# Supplementary material for: Metabolic sensing in AgRP neurons integrates homeostatic state with dopamine signalling in the striatum
Source: eLife journal article supplement (doi:10.7554/elife.72668), 2022-01-12
Supplement: fig1-data1 [file Fig1a.xlsx]

## Sheet: Sheet1
WT	KO
-46	-43
-40	-44
-49	-54
-50	-45
-49	-46
-40	-35
-44	-43
-41	-39
-47	-39
-44	-48
-50	-52
-43	-40
-37	-33
-39	-46
-47	-40
-38	-52
-40	-43
-44	-39
-37	-37
-45	-38
-37	-40
-42	-38
	-43
