# Supplementary material for: Metabolic sensing in AgRP neurons integrates homeostatic state with dopamine signalling in the striatum
Source: eLife journal article supplement (doi:10.7554/elife.72668), 2022-01-12
Supplement: fig1-data1 [file Fig1B.xlsx]

## Sheet: Sheet1
WT	KO
1098.57	1933.33
1425.71	715.455
699.167	876.364
1550	3645
2090	582.5
1343.33	1550
2045	1081.43
2000	1207.14
1830	1160
1142.86	1908.33
1435	1824
1368.57	3886.67
3030	3179.17
	1747.5
	2335
	2112.5
