# Supplementary material for: Metabolic sensing in AgRP neurons integrates homeostatic state with dopamine signalling in the striatum
Source: eLife journal article supplement (doi:10.7554/elife.72668), 2022-01-12
Supplement: fig1-data1 [file Fig1C.xlsx]

## Sheet: Sheet1
WT	KO
0.71754	0.130584
1.05307	0.939597
0.939746	0.16731
0.132248	0.45393
0.228063	0.170604
0.434783	1.87838
0.058824	0.1
0.898246	0.9
1.82469	0.630631
1.24795	0.27027
3.31481	0.883281
0.134529	1.83601
2.26286	1.02485
0.918919	1.86416
	1.72932
	1.57983
