# Supplementary material for: Metabolic sensing in AgRP neurons integrates homeostatic state with dopamine signalling in the striatum
Source: eLife journal article supplement (doi:10.7554/elife.72668), 2022-01-12
Supplement: fig1-data1 [file Fig1EF.xlsx]

## Sheet: Sheet1
		WT	KO
excitation		10	7
inhibition		7	4
no response		4	14
