# Supplementary material for: Metabolic sensing in AgRP neurons integrates homeostatic state with dopamine signalling in the striatum
Source: eLife journal article supplement (doi:10.7554/elife.72668), 2022-01-12
Supplement: fig1-data1 [file Fig1G.xlsx]

## Sheet: Sheet1
Agrp GCamp								Agrp Crat
0.756	-0.137	1.2	2.01	1.12	-1.15	0.429		0.663	-0.267	0.0485	-0.455	1.8
0.719	-0.0432	-0.151	1.85	0.598	-1.24	-0.289		0.953	-1.8	0.0315	0.0429	1.21
0.732	0.0881	1.09	2.37	1.37	-0.868	-0.483		0.411	-0.525	-0.0614	-0.303	0.909
0.694	0.168	0.699	1.63	0.59	-0.849	-0.155		-0.395	-1.49	-0.0877	-0.165	0.965
0.691	0.173	0.579	1.85	0.264	-0.542	-0.434		0.865	-1.06	-0.065	-0.0568	1.92
0.639	0.297	0.622	1.5	-0.0105	-0.00226	-0.249		0.398	-1.38	-0.492	0.8	2.61
0.609	0.245	-0.389	3.24	0.477	-0.92	0.00977		-0.513	-1.71	-0.146	0.366	2.06
0.704	0.395	-0.47	1.86	0.648	-0.472	0.422		-0.325	-1.35	-0.485	0.704	3.48
0.909	0.629	0.978	2.01	1.83	-1.07	0.177		0.516	-1.68	-0.365	0.0581	2.3
0.982	0.702	-0.336	2.12	0.544	-0.956	-0.663		0.521	-1	-0.358	0.739	0.502
0.97	0.855	0.469	2.23	1.01	-1.23	-0.202		0.983	-1.54	-0.164	0.745	0.778
0.929	0.854	1.36	2.15	0.597	-0.884	-0.568		-0.34	-2.01	-0.146	0.483	1.23
0.911	0.768	1.45	2.24	0.879	-0.729	-1.18		-0.261	-2.56	-0.213	-0.446	1.8
0.836	0.784	0.95	2.36	1.26	-0.668	-1.03		0.772	0.115	-0.468	-0.3	1.54
0.869	1.1	-0.541	1.97	0.158	-1.1	-1.1		0.787	-0.902	0.228	-0.624	1.23
0.743	0.964	0.529	1.89	1.3	-1.37	-0.512		-0.0541	-2.25	0.135	0.389	0.429
0.866	0.776	0.32	1.72	0.136	-1.24	-0.235		-0.0215	-1.47	0.2	-0.22	0.928
0.889	1.04	0.85	2.7	1.11	-1.53	0.365		0.73	-1.64	0.332	0.0867	1.74
0.871	0.957	1.64	2.78	1.6	-1.37	-0.0577		-0.639	0.433	0.383	0.477	1.51
0.86	0.49	1.37	2.54	1.19	-1.26	0.124		-0.522	-1.98	0.923	0.709	1.19
0.71	0.72	0.253	1.94	0.653	-1.16	0.929		-0.587	-1.06	0.151	0.341	0.614
0.689	0.688	0.656	1.8	0.554	-0.927	-0.433		-0.507	-2.42	-0.291	0.885	0.0619
0.634	0.65	0.0747	1.95	0.376	-1.93	0.152		-0.711	-1.27	0.255	1.5	0.268
0.537	0.819	1.02	1.4	-0.365	-1.89	0.375		-0.534	-0.825	-0.445	0.216	0.0148
0.449	0.588	-0.0018	1.22	1.25	-1.21	-0.586		0.393	-1.45	-0.114	1.02	-0.511
0.411	0.397	0.0595	1.3	-0.557	-1.23	-0.0418		-0.801	-1.2	0.172	0.175	0.33
0.55	0.139	0.645	1.1	1.32	-0.713	-0.0486		1.29	-0.965	-0.219	-0.573	0.181
0.508	0.431	-0.0202	1.19	0.806	-1.28	-0.0104		0.117	-0.981	-0.0256	0.242	-1.3
0.505	0.291	-0.405	1.09	1.12	-0.919	0.323		-0.122	-1.55	0.114	0.776	-1.4
0.65	0.353	0.609	1.02	0.404	-1.2	0.481		0.177	-0.531	-0.0943	0.327	-0.0594
0.61	0.135	0.984	0.823	1.23	-1.65	0.00471		-0.19	-2.41	0.134	-0.311	1.23
0.563	-0.0698	-0.399	0.733	0.739	-0.979	0.038		-0.287	-1.25	0.413	-0.103	1.3
0.564	0.245	-0.255	0.893	1.01	-1.8	0.0691		-0.631	-2.02	0.0816	-0.386	1.39
0.523	0.112	-0.432	1.02	0.16	-0.579	0.0245		-1.44	-2.65	0.127	0.167	-1.37
0.499	0.0269	0.918	0.573	-0.507	-1.57	0.32		-1.54	-2.1	0.193	0.283	0.804
0.546	0.0841	0.87	0.565	-0.729	-1.26	-0.188		-0.0735	-1.13	-0.00554	0.119	0.224
0.523	0.398	0.555	0.697	0.764	-1.12	0.167		0.739	-2.05	-0.431	-0.103	0.837
0.414	0.0326	1.48	0.73	-0.905	-1.29	0.466		-0.202	-1.77	0.445	-0.173	1.66
0.359	-0.515	0.0728	1	1.64	-1.83	0.148		-0.153	-1.86	0.046	-0.603	0.507
0.39	-0.712	-0.235	1.52	0.896	-1.02	0.484		-0.197	-1.7	-0.0359	-0.921	-1.12
0.323	-0.447	-1.02	1.49	-0.195	-0.209	1.26		0.178	-1.08	-0.139	-0.669	0.192
0.359	-0.407	0.162	0.93	-0.0382	0.356	0.196		1.57	-2.93	-0.0473	-0.0245	0.526
0.217	-0.683	0.865	1.08	-0.923	0.902	1.28		1.04	-1.46	-0.589	-0.672	2.03
0.243	-0.471	0.726	1.18	-0.157	1.32	0.851		0.27	-0.906	-0.381	-0.92	1.66
0.296	-0.751	1.16	1.25	-0.114	0.383	0.894		-0.118	-1.02	-0.337	-0.533	1.08
0.254	-0.768	1.1	1.31	-0.191	1.1	0.87		0.702	-0.12	-0.742	-1.56	-0.00825
0.322	-0.555	-0.0606	0.927	0.734	0.778	1.09		0.263	-0.688	-0.363	-1.47	-0.626
0.298	-0.307	0.815	1.48	-0.344	0.225	0.87		-0.712	-1.28	-0.142	-1.2	0.565
0.251	-0.475	0.233	1.15	-0.419	0.622	1.36		1.07	-1.55	0.192	-1.4	2.05
0.298	-0.554	-0.933	1.15	-0.401	0.659	0.834		0.576	-1.13	0.411	-1.24	2.02
0.434	-0.581	0.225	1.62	0.631	0.0559	0.633		1.35	-1.07	-0.361	-1.48	1.55
0.36	-0.495	0.795	1.68	-0.207	-0.15	1.06		0.877	-1.93	-0.103	-1.41	1.65
0.401	-0.503	0.583	1.82	0.101	-0.0387	0.716		0.792	-1.92	-0.236	-1.57	-0.561
0.473	-0.345	0.631	2.31	-0.855	-0.184	0.71		-0.121	-1.36	-0.0738	-1.01	-1.63
0.553	-0.273	0.643	2.23	-0.582	0.574	1.02		1.07	-1.17	-0.377	-1.15	0.353
0.531	-0.259	0.723	2.21	-1.16	-0.666	0.92		0.472	-1.91	0.567	-0.777	1.46
0.546	-0.138	1.02	1.81	-0.476	-0.228	0.882		0.205	-1.3	0.132	-0.868	-0.405
0.715	0.0436	0.788	1.36	0.295	-0.00174	0.998		0.692	-1.02	0.0674	-1.36	-1.33
0.699	-0.428	1.02	1.48	-0.522	0.655	1.19		-0.534	-0.638	0.0848	-1.29	-1.19
0.645	-0.128	1.26	1.94	-0.872	0.779	1.62		0.954	-0.945	0.293	-1.67	-1.95
0.729	-0.184	0.243	2.93	-1.46	-0.364	1.43		0.552	-0.958	0.432	-1.01	-2.77
0.811	-0.653	-0.732	1.74	-3.66	0.207	0.832		1.29	-1.52	-0.0265	-0.213	-3.2
0.753	-0.646	0.257	1.16	-0.895	-0.0273	0.421		1.33	-1.2	0.129	0.904	-2.3
0.665	-0.177	-0.0532	1.8	-1.16	-0.246	0.992		0.922	-1.01	-0.611	1.01	-2.48
0.674	-0.424	-0.0191	2.03	-2.65	0.394	-0.0837		0.0294	-1.39	-0.35	0.218	-1.62
0.703	-0.262	-0.636	1.74	-1.79	0.476	0.857		0.207	-1.09	0.0319	-0.221	-1.86
0.595	-0.37	1.02	1.8	-1.94	2.75	1.05		0.718	-1.27	0.349	-0.238	-1.66
0.575	-0.408	0.669	1.29	-1.86	1.89	1.79		0.305	-0.443	-0.481	0.215	-2.89
0.635	-0.393	0.386	1.51	-2.72	2.2	1.53		1.3	0.478	-0.241	-0.305	-2.97
0.641	-0.0624	-0.397	1.87	-2.42	2.63	1.79		0.731	-1.3	-0.421	0.157	-1.11
0.586	0.172	0.394	1.84	-1.14	2.32	1.46		1	-1.14	-0.269	0.128	-0.259
0.589	0.507	1.42	1.08	-1.79	2.27	0.743		1.38	-0.317	-0.394	-0.261	0.717
0.632	0.318	-0.542	0.983	-2.51	2.37	1.14		1.25	-0.803	-0.311	-0.668	1.1
0.627	-0.253	0.232	1.75	-2.17	2.11	1.03		1.17	-1.64	-0.368	-0.649	-0.0169
0.63	-0.447	-0.163	1.45	-3.28	2.22	1.22		0.791	-0.321	0.298	0.0528	0.117
0.504	-0.52	-0.24	1.37	-3.44	1.85	1.35		0.365	-2.21	0.227	0.476	-0.54
0.478	-0.324	0.325	1.04	-2.05	1.29	0.893		0.466	-0.72	-0.0215	-0.0176	-0.263
0.475	0.0544	0.295	0.639	-1.89	1.37	1.3		0.63	-1.21	-0.266	-0.0597	-0.00742
0.448	0.0272	0.491	0.372	-2.76	1.34	1.35		0.138	-1.99	-0.0269	0.0214	1.36
0.533	-0.287	0.118	0.373	-1.76	1.38	1.22		0.725	-0.942	-0.0491	0.0335	-0.124
0.45	-0.135	-0.945	0.939	-1.81	1.11	1.89		1.43	-0.259	-0.163	-0.765	-0.228
0.513	-0.354	-0.203	1.55	-2.2	0.579	1.36		0.371	-0.925	0.0053	-0.164	0.442
0.53	-0.17	0.126	1.5	-2.29	0.101	1.39		0.00891	-1.23	0.0733	-1.58	1.1
0.558	-0.308	-0.175	1.5	-2.24	0.98	1.11		1.06	-1.83	-0.21	-1.41	0.861
0.622	-0.444	0.308	0.509	-2.78	0.0495	1.48		1.12	-2.03	0.00359	-0.471	1.26
0.461	-0.355	0.401	1.15	-0.78	-0.314	0.777		0.427	-2	-0.0899	-1.12	2.09
0.4	-0.342	0.0688	0.637	0.952	0.215	0.465		1.11	-1.51	0.208	-0.632	1.52
0.578	-0.884	0.0543	0.173	-0.63	0.293	0.759		0.849	-1.55	0.0485	-0.954	1.44
0.563	-1.1	0.159	0.152	-0.0403	0.412	0.0521		1.69	-2.02	0.242	-0.0421	0.635
0.81	-1.05	1.4	0.916	0.508	0.432	0.138		3.43	-1.58	-0.235	0.415	0.398
0.665	-0.409	-0.0681	0.666	0.979	1.08	-0.122		3.85	-0.017	-0.256	-0.0683	1.35
0.539	-0.279	-0.71	-0.445	1.13	0.957	-0.991		3.28	-1.49	0.0373	-0.0386	0.911
0.677	-0.714	0.253	-0.0223	0.259	1.93	-0.165		2.22	-2.25	0.287	0.303	1.26
0.695	-0.416	-0.678	-0.547	0.564	2	0.335		2.38	-1.44	-0.509	-0.404	1.05
0.685	-0.206	-0.575	0.23	0.79	1.99	0.449		2.1	-0.906	-0.366	-0.192	0.602
0.669	-0.416	-1.16	-0.394	1.89	0.625	-0.528		2.42	-1.85	0.0909	-0.457	-0.656
0.727	-0.561	0.552	0.47	0.277	0.221	0.49		1.7	-1.56	-0.821	-0.0544	-0.0108
0.766	-0.602	0.00151	0.368	0.766	0.798	0.0613		0.93	-1.61	-0.733	0.0924	-1.13
0.909	-0.56	0.17	-0.0206	1.44	1.13	-0.203		2.08	-1.77	-0.715	0.535	-0.0525
1.01	-0.484	0.351	-0.639	0.624	2.58	-0.849		2.34	-1.49	-0.547	0.0768	0.262
0.915	-0.304	0.789	0.214	-0.769	1.88	-0.286		1.66	0.916	-0.658	0.267	0.45
0.827	-0.336	0.571	-0.635	0.583	2.26	-0.193		1.14	0.609	-1.07	0.205	0.614
0.855	-0.153	1.13	-0.867	1.6	2.3	-0.0307		0.951	0.346	-0.72	-0.0246	1
0.864	-0.251	-1.19	0.193	2.22	1.93	-0.463		2.01	0.199	-0.25	-0.163	0.711
0.798	-0.184	0.15	-0.566	0.371	1.44	0.483		1.98	1.5	-0.804	0.026	-0.523
0.866	-0.502	0.7	-0.489	0.621	1.7	-0.224		1	0.514	-0.755	0.154	1.38
0.808	-0.403	0.59	-0.0896	0.893	1.56	-0.0608		2.03	0.335	-0.207	-0.149	0.596
0.648	-0.0558	0.532	-0.484	0.353	1.65	0.51		1.5	-0.148	-0.364	-0.384	0.46
0.799	-0.196	0.426	0.355	-0.944	0.759	0.48		0.977	0.691	-0.418	1.09	1.58
0.835	-0.672	0.523	0.622	0.276	0.818	1.12		1.71	0.874	-0.0548	1.73	1.91
0.867	-0.327	1.25	0.12	0.129	0.384	1.77		1.98	-0.198	-0.000873	2.11	1.46
0.799	-0.763	0.497	-0.65	0.243	0.109	0.812		1.24	-0.141	0.153	1.53	0.52
0.716	-0.764	1.06	-1.21	0.219	0.591	0.658		1.1	-0.302	-0.0657	0.495	-0.681
0.747	-0.437	-0.937	-0.0805	0.368	0.505	-0.183		1.07	-1.81	0.092	0.427	0.364
0.687	-0.194	-0.82	-0.0933	-0.418	0.835	-0.175		1.5	0.128	-0.597	0.0118	-0.669
0.745	-0.655	0.362	0.128	-0.825	0.707	-0.315		1.08	0.541	-0.194	-0.0403	0.59
0.786	-0.646	0.0712	-0.00736	-0.53	0.331	-0.821		1.96	1.9	-0.0733	0.00702	0.932
0.843	-0.836	0.603	0.015	0.374	0.14	-0.171		2.23	0.139	-0.422	0.65	-0.134
0.833	-0.757	0.483	-0.566	0.779	0.148	0.478		1.19	0.384	-0.422	0.38	-0.209
0.91	-0.713	0.415	-0.2	0.578	-0.352	-0.176		2.26	0.419	-0.492	-0.12	-0.0902
0.935	-0.326	0.409	-0.632	0.262	-0.301	-0.216		1.98	0.948	-0.61	0.243	-0.0737
0.973	-0.542	0.4	-0.364	0.0613	-0.334	-0.162		1.18	0.56	-0.522	0.351	0.54
0.787	-0.349	1.39	-0.34	1.96	-0.707	-0.159		0.596	-0.124	-0.417	0.713	0.128
0.619	-0.554	0.243	-0.0339	0.288	0.181	-0.584		1.17	-0.295	-0.533	0.555	0.285
0.758	-1.16	-0.0721	-0.324	0.305	0.129	0.116		0.69	0.639	-0.507	0.629	0.107
0.751	-1.03	0.956	-0.755	0.294	-0.248	-0.421		0.405	1.39	-0.401	0.00208	0.147
0.719	-0.706	-0.478	-0.0939	1.87	-0.769	0.152		0.783	0.884	-0.295	1.06	-0.381
0.625	-0.907	-0.479	-1.06	2.37	-1.13	-0.445		1.74	0.262	-0.724	0.916	1.28
0.58	-0.795	1.24	-0.456	0.268	-0.106	0.0347		2.49	-0.453	-0.562	0.356	0.322
0.51	-0.708	0.571	-0.447	-0.837	-0.405	-0.351		1.5	0.879	-0.489	0.661	-0.216
0.567	-0.844	0.263	-0.383	-0.183	-0.172	0.499		1.26	-0.285	-0.822	1.08	-0.0379
0.541	-0.735	0.315	-0.455	-1.06	0.162	-0.0262		0.102	0.798	-0.865	0.777	0.00681
0.579	-1.15	0.00649	-0.48	-0.0185	-0.00323	-0.303		-0.308	1	-0.548	1.15	-1.06
0.539	-1.03	0.0935	-0.373	0.0113	0.00941	0.291		0.35	-0.602	-0.334	-0.229	0.624
0.427	-0.596	0.505	-0.0651	1.08	-0.948	0.452		-0.305	-0.585	-0.535	-0.379	0.28
0.483	-0.42	-0.58	-0.186	0.0334	-0.0932	-0.498		0.216	0.371	-0.382	0.449	-0.0194
0.403	-0.579	-0.691	0.0422	-0.214	-0.519	-0.311		0.237	0.686	-0.47	0.429	-0.538
0.386	-1.2	0.166	-0.451	1.17	0.265	0.00598		0.0506	0.133	-0.536	0.822	-0.536
0.464	-0.99	-0.653	-1.08	0.669	-0.536	0.162		0.658	-1.92	-0.608	0.48	0.463
0.595	-1.18	0.691	-0.429	0.146	0.409	-0.43		0.164	0.196	-0.151	-0.259	-0.411
0.598	-1.01	-0.562	-0.49	-0.213	0.604	0.00498		0.0718	1.02	0.0889	-0.596	0.903
0.621	-0.806	-0.639	-0.199	-0.786	0.262	0.516		0.0248	0.245	0.672	-0.476	0.0874
0.548	-0.975	-0.571	-0.432	-0.422	0.00114	-0.109		1.05	-0.825	0.277	-0.605	-0.945
0.331	-0.93	-0.28	-0.169	0.155	0.31	0.756		1.08	0.558	0.733	-0.254	-0.439
0.342	-1.12	-1.06	0.0988	0.874	-0.141	-0.281		1.07	1.94	0.64	-0.00911	-0.319
0.231	-1.19	-0.839	-0.0667	1.74	0.559	0.06		0.291	1	0.302	0.179	0.166
0.214	-0.995	0.135	-0.154	-0.53	0.212	0.391		0.436	0.703	0.285	0.0858	-0.863
0.25	-1.06	-0.46	0.0689	-0.0269	0.477	-0.058		1.12	1.13	0.424	0.00143	-0.939
0.243	-1.02	-1.2	-0.418	-0.601	1.02	-0.0223		1.8	-0.784	-0.131	-0.0801	-0.828
0.205	-1.18	-0.546	0.0123	0.457	0.939	0.0195		1.76	-0.614	0.692	-0.697	0.699
0.222	-0.697	-1.02	-0.0422	0.00691	0.543	0.647		0.803	0.0431	-0.251	-0.425	0.0987
0.11	-0.807	0.746	-0.113	-0.106	-0.173	0.516		-0.0464	0.909	-0.463	0.0632	0.811
0.0653	-0.767	-0.0165	0.0602	0.654	0.386	0.482		1.34	0.263	-0.622	-0.855	1.18
0.024	-0.967	0.184	0.124	1.01	0.204	-0.127		0.903	-0.0643	-0.401	-1.01	0.0236
-0.0437	-1.14	0.377	0.229	0.259	0.515	0.214		-0.63	0.278	-1.25	-1.08	-0.223
0.0452	-1.6	0.198	0.0818	-0.485	0.726	0.4		-0.268	-0.57	-0.804	-1.03	1.52
0.0285	-1.29	-0.911	0.538	0.091	0.563	0.0688		-0.873	0.201	-0.123	-0.8	0.12
0.123	-1.19	0.47	-0.062	-0.46	0.759	0.203		-0.521	0.752	0.0445	-0.924	0.302
0.117	-1.21	-0.471	0.687	0.641	-0.17	0.486		-0.51	1.03	0.334	-0.41	0.312
0.15	-1.42	-0.391	-0.467	-0.417	-0.395	-0.462		-0.489	1.04	0.172	-0.904	0.891
0.173	-1.4	-0.442	-0.421	0.868	-1.1	-0.312		-1.58	0.93	0.0505	-0.739	0.13
0.228	-1.16	-1.76	-0.245	0.719	-0.00143	0.158		-0.602	0.801	-0.148	-1.66	-0.426
0.246	-0.782	-1.17	-0.0693	0.16	-0.394	-0.0672		-0.879	1.31	0.076	-1.46	-0.301
0.271	-0.695	-0.187	-0.354	0.539	0.108	1.16		-0.743	0.0382	-0.995	-0.815	-1.04
0.339	-0.878	-1.17	-0.281	-0.469	0.39	1.65		1.35	-0.259	-0.987	-0.869	0.767
0.301	-0.766	-1.27	0.181	-0.335	1.01	1.44		0.682	-0.0728	-0.583	-0.316	0.108
0.25	-0.932	0.871	-0.493	0.589	0.811	1.21		1.46	0.959	-0.337	-0.546	0.349
0.147	-0.701	0.382	-1.39	0.529	0.43	0.788		0.397	0.838	-0.674	-1.39	0.588
0.166	-0.8	0.47	-0.847	0.299	0.563	0.799		0.0466	0.364	-0.766	-1.2	1.32
0.238	-0.449	-0.834	-0.608	2.13	0.738	0.752		0.214	0.74	-0.577	-0.439	-0.855
0.373	-0.916	-0.655	-0.417	1.49	0.494	1.66		0.833	-0.153	-0.39	-0.627	-0.743
0.61	-0.705	-0.576	-0.811	0.843	1.47	0.498		0.289	0.976	-0.175	-0.272	0.0926
0.724	-0.857	-0.184	-0.642	0.26	0.672	0.783		-0.519	0.377	-0.436	-0.699	-0.556
0.847	-0.717	-0.601	-0.462	1.06	0.0648	1.65		-0.335	-0.0555	-0.413	-1.16	-0.069
0.853	-0.966	-0.65	-1.85	1	-0.117	1.3		1.29	0.225	-0.0827	-1.39	-0.481
0.771	-1.06	-1.37	-1.46	-0.0758	0.53	1.93		0.62	0.522	0.122	-1.25	0.485
0.734	-0.771	-0.13	-0.963	-0.531	-0.0848	2.29		1.45	-0.157	0.683	-1	-0.53
0.796	-0.844	-0.401	-0.849	0.762	-0.187	1.78		0.424	0.867	0.439	-0.0824	0.624
0.744	-0.563	-0.112	-0.377	0.399	-0.0156	1.55		0.93	-1.22	0.875	-0.619	0.202
0.668	-0.778	-0.62	-0.917	0.981	0.199	1.3		-0.191	-0.95	0.596	-0.566	0.708
0.612	-0.821	-1.07	-0.164	-0.592	-0.332	1.66		-0.703	1.18	0.525	-0.855	0.585
0.709	-1.22	-0.656	-0.0579	1.54	-1.25	1.74		-0.307	0.682	0.44	-1.56	0.504
0.781	-1.22	-1.03	-1.27	1.22	-1.19	0.604		0.364	0.0374	0.519	-0.48	-0.875
0.723	-0.919	-0.251	-0.0967	0.937	-1.88	0.571		0.883	-1.55	0.703	0.0233	-0.209
0.621	-0.804	-0.665	-1.55	0.836	-0.457	0.928		-0.0145	0.271	0.618	0.175	-0.966
0.554	-1.26	-0.751	-0.668	0.568	-1.31	0.38		-0.0236	0.899	0.659	0.903	-0.407
0.458	-0.987	0.0535	-0.169	1.35	-0.881	-0.125		-0.312	-0.0583	0.566	-0.0159	0.935
0.589	-0.732	1.01	0.127	0.834	-0.102	0.639		0.453	-0.141	0.509	-0.239	0.0117
0.48	-1.05	-1.45	-0.749	1.64	0.0998	0.801		0.605	-0.0329	0.627	-0.76	-0.443
0.535	-0.877	0.0375	-0.834	1.56	-1.29	0.895		0.727	0.98	0.683	-0.783	0.243
0.541	-0.806	-1.64	0.293	-0.522	-0.226	1.02		0.52	-0.412	0.597	-1.13	-0.0867
0.539	-0.804	-1.6	1.48	0.27	-0.0532	1.09		0.184	0.964	0.979	-1.06	0.825
0.395	-1.05	-0.774	0.384	-0.274	0.0128	1.06		0.172	-0.137	0.869	-0.773	-0.655
0.372	-0.984	-0.0976	1.08	0.743	-0.439	0.289		0.296	-1.31	0.864	-0.683	0.363
0.359	-0.841	-1.24	0.518	1.03	-0.609	-0.085		-0.0677	-2.34	1.05	-0.787	0.734
0.43	-1.14	-0.538	0.366	0.955	-0.341	0.238		0.307	1.33	0.852	-0.911	1.49
0.363	-0.98	-0.401	0.294	-0.912	-0.209	0.014		0.896	-0.572	0.447	1.11	-0.88
0.392	-0.849	-0.311	-0.342	0.978	-0.43	0.529		0.0615	-0.372	0.671	1.56	0.557
0.395	-1.04	-1.08	-0.311	0.587	-0.0224	0.0698		-0.0905	-1.12	0.309	1.12	0.6
0.345	-0.827	0.408	0.837	0.53	0.0783	1.25		0.0084	1.25	0.423	1.38	0.74
0.392	-0.23	0.148	0.745	0.241	-0.301	1.11		0.151	-0.218	0.418	0.38	1.28
0.711	-0.432	-0.181	0.0514	0.441	-0.507	-0.0865		0.403	0.36	0.41	-0.297	-0.248
0.632	-0.53	-0.591	-0.129	-0.24	-0.114	0.588		-1.73	1.05	0.286	0.448	0.0676
0.761	-0.698	0.15	-1.14	0.319	-0.106	0.971		-0.43	-0.846	0.205	0.15	0.413
0.914	-0.549	-0.531	-0.666	0.69	-0.225	0.329		0.227	-0.578	0.605	0.292	0.591
1.15	-0.547	-1.1	0.00638	-0.0978	-0.261	0.285		-0.306	-0.0828	0.854	0.52	1.08
1.43	-0.109	-0.253	0.383	0.714	-0.153	1.69		-0.994	-0.216	0.598	-0.581	-0.0423
1.86	-0.193	0.112	0.673	1.09	-0.401	1.51		-0.11	-0.528	0.559	-0.381	0.148
2.37	-0.162	-0.0103	1.06	0.343	-0.288	1.05		-0.143	-1.04	0.488	-0.649	0.467
2.66	0.285	-0.497	-0.451	-0.274	-0.657	1.83		-0.536	-0.37	0.748	-0.00482	0.56
2.68	0.117	0.481	0.625	0.201	-0.869	1.78		-0.677	-0.456	0.294	0.0267	0.849
2.52	0.0306	-0.35	0.106	0.729	-0.342	2.4		-0.287	0.322	0.865	0.0857	-0.464
2.47	0.0278	-1.23	-0.261	1.69	-0.37	1.43		-0.386	-0.629	1.35	1.73	-0.543
2.48	0.00604	-0.499	0.647	0.668	0.156	1.39		0.538	-1.12	-0.0483	0.808	0.0103
2.42	0.0829	-0.00362	-0.16	1.35	-0.517	2.2		0.503	-0.6	0.102	0.602	0.135
2.46	-0.0489	-0.408	-0.533	-0.814	-0.804	1.14		0.558	-0.895	0.0922	0.421	1.08
2.37	0.422	-0.556	-0.529	0.284	-0.648	1.29		-0.477	0.191	-0.000351	0.319	1.34
2.31	0.186	0.156	-0.818	0.259	-0.982	0.837		-0.0667	0.27	-0.0959	0.27	0.00438
2.3	0.309	-1.83	0.0489	-0.273	-1.72	1.3		0.817	1.17	-0.403	0.227	-2.08
2.18	0.247	-0.893	1.25	-0.663	-1.58	0.7		1.34	0.438	-0.458	0.527	-0.621
2.32	0.298	-0.337	0.214	-0.435	-0.813	1.29		0.998	-0.345	-0.937	-0.153	-0.942
2.25	0.0244	-0.496	-0.158	-0.968	-1.14	1.3		0.394	0.152	-1.36	-0.279	-1.78
2.22	0.302	-0.735	0.21	-0.387	-0.606	1.54		-0.141	0.929	-0.907	0.33	-0.818
2.17	-0.0243	0.892	-0.2	0.569	-1.15	1.48		1.25	-0.0417	-0.475	0.645	0.962
2.06	-0.243	0.443	0.183	1.11	-0.794	1.37		-0.018	0.895	-0.801	0.633	0.204
2.11	0.0022	-0.53	0.29	0.329	0.0482	1.48		-0.581	0.361	-1.1	0.777	0.628
2.06	-0.331	-0.53	0.0406	0.698	0.185	1.61		-0.957	0.311	-0.787	0.828	-0.452
1.98	-0.338	-0.28	-0.511	-0.573	0.0741	1.25		-0.407	-0.159	-0.636	-0.122	-0.117
1.92	-0.592	0.125	0.496	0.0845	0.489	0.652		-0.36	0.8	-0.95	-0.187	-0.0338
1.92	-0.553	-0.906	-0.24	-0.122	0.208	0.373		0.271	0.095	-0.956	0.175	0.494
1.78	-0.408	-0.406	-0.223	0.235	0.173	1.11		-1.38	0.608	-0.701	0.522	0.468
1.82	-0.558	0.293	-0.683	0.521	-0.0227	0.869		-1.43	0.532	-0.877	-0.0911	-1.58
1.69	-0.534	-0.399	-0.592	0.768	0.567	1.63		-1.8	0.88	-0.739	0.481	-0.942
1.58	-0.616	-1.1	-0.0718	-0.233	2.25	1.55		-1.3	0.203	-1.03	-0.0676	-1.3
1.59	-0.734	0.252	-0.275	-0.43	2.3	1.15		-1.32	0.725	-1.22	-0.777	-1.98
1.56	-0.554	-0.668	-0.136	0.103	2.32	2.73		-1.03	0.996	-1.24	-1.32	-0.786
1.62	-0.631	-1.04	-0.68	0.856	2.89	3.55		-0.899	0.0169	-1.01	-0.626	-1.48
1.63	-0.571	-0.136	-1.19	0.465	2.3	3.78		-0.718	-0.0814	-1.18	-0.852	-1.31
1.53	-0.631	-1.12	-0.52	-0.12	2.39	3.71		-1.32	0.265	-1.02	-0.0461	-1.47
1.52	-0.51	-0.0361	0.165	1.25	1.86	3.44		-1.72	-0.0683	-1.07	0.423	-0.0798
1.58	-0.079	-0.104	-0.0892	0.241	2.02	2.32		-0.336	-2.14	-1.38	0.286	-1.24
1.56	-0.241	-0.214	-0.399	0.957	2.49	2.64		-0.211	-0.392	-1.6	0.175	-1.81
1.53	-0.218	-0.121	-0.222	-0.165	1.82	2.59		0.308	1.44	-1.4	-0.851	-0.89
1.47	-0.405	0.173	0.0346	-0.533	1.87	2.26		-0.323	0.784	-1.72	-0.504	0.316
1.42	-0.472	-0.71	0.121	0.476	1.72	2.13		-0.862	0.424	-1.56	-0.598	-0.529
1.24	-0.478	0.249	-0.979	1.14	1.92	1.55		-1.2	1.04	-1.5	0.221	0.506
1.17	-0.35	-1.07	-0.126	0.898	1.42	0.641		-2.29	1.48	-1.68	0.0516	-0.231
1.17	-0.342	-0.832	-0.337	1.05	1.19	0.888		-1.07	-0.818	-1.58	-0.774	2.27
1.14	-0.393	-1.56	-0.573	-0.53	0.854	0.673		-1.92	0.0453	-1.14	-1.19	1.21
1.09	-0.553	-1.12	0.39	0.0869	1.19	0.279		-1.04	0.573	-1.11	-0.764	2.02
1.01	-0.756	-0.462	-0.718	1.54	1.36	0.178		-1.67	-0.362	-1.03	-0.186	0.204
1.05	-0.729	-0.0836	-0.338	1.89	2.09	-0.075		-1.47	0.801	-0.602	-0.541	-1.02
0.947	-0.839	-1.01	-1.26	0.466	2.13	-0.0351		-1.62	1.17	-0.49	-0.785	-1.68
0.972	-0.558	0.0581	-1.09	-0.23	1.32	-0.842		-1.64	-0.0791	-0.374	-0.471	-1.33
1.01	-0.627	-1.5	-0.388	-0.762	0.732	-0.123		-1.55	0.762	-0.338	-0.961	-1.71
0.907	-0.834	-0.526	0.26	0.939	1.12	-0.912		0.131	-0.48	-0.591	-0.515	0.011
0.884	-0.448	-1.01	0.136	0.543	0.94	-0.752		0.177	-0.698	-0.574	-0.876	0.103
0.799	-0.193	-0.812	-0.283	0.454	1.45	-0.204		-1.26	0.661	-0.522	-0.12	-0.257
0.747	-0.789	0.335	-0.225	0.15	0.937	-1.09		-2.03	0.126	-0.752	-0.0102	-1.59
0.676	-0.882	-0.484	-0.433	-1.52	0.318	0.118		-1.91	0.0926	-0.865	-0.334	-0.614
0.833	-0.635	0.11	0.205	0.577	-0.0689	-0.369		-1.22	0.537	-1.12	-0.516	0.221
0.748	-0.606	-0.185	0.271	0.268	0.856	-0.6		-1.51	1.15	-0.496	-0.766	0.65
0.722	-0.758	-0.85	0.97	0.245	0.532	-0.992		-0.801	-0.69	-0.642	-1.21	0.83
0.628	-0.889	-0.28	0.256	0.119	0.475	-1.16		-0.238	0.643	-0.45	-0.382	-0.821
0.61	-1.21	0.693	0.184	-0.214	0.942	-0.409		-0.608	-0.0738	-1.01	-0.333	-0.665
0.593	-1.19	-0.156	-0.092	0.711	-0.118	-0.601		-0.966	-1.34	-0.724	-0.393	-1.11
0.44	-1.02	-0.678	-0.294	0.934	-0.209	-0.163		-2.19	0.434	-0.853	-0.225	-1.25
0.393	-1.04	-0.107	0.201	0.753	0.138	-0.259		-0.96	-0.68	-1.01	-0.561	-1.39
0.519	-0.992	-0.598	-0.393	-1.88	-0.0775	-0.693		0.382	-0.822	-0.942	-1.26	-0.713
0.43	-1.21	-1.18	0.0573	-0.86	1.22	-0.56		0.761	-0.201	-1.45	-1.57	-0.729
0.464	-1.15	-0.857	0.501	-1.07	0.467	-0.811		-0.423	-2.06	-1.06	-1.3	0.142
0.437	-1.12	-0.265	-0.319	-0.42	-0.469	-0.987		-1.13	1.23	-0.721	-0.805	-0.304
0.34	-1.2	0.964	-0.5	-1.16	0.313	-1.17		-0.116	1.42	-0.682	-0.412	0.156
0.3	-0.7	-0.526	0.244	-0.167	0.276	-0.859		-1.16	1.52	-0.864	-0.0337	0.149
0.284	-0.871	-0.236	0.264	-1.64	0.88	-0.753		-1.14	-0.319	-0.515	-0.551	1.23
0.244	-1.1	-0.053	0.704	0.117	0.336	-1.14		-0.982	-0.836	-1.03	-0.425	0.92
0.234	-1	0.0533	1.39	-1.81	0.0894	-1.1		-0.676	1.5	-0.851	0.57	0.0227
0.241	-1.06	-0.474	0.778	1.7	0.0976	-1.61		-1.85	1.22	-0.655	-0.5	-0.274
0.231	-0.946	-0.0222	0.202	1.01	-0.0884	-0.844		-1.55	0.556	-0.529	0.0443	0.25
0.184	-0.877	-1.06	0.736	0.64	-0.135	-1.13		-0.946	1.64	-0.731	-0.124	0.521
0.111	-0.845	-0.924	0.74	1.49	-0.292	-0.929		-1.29	-0.549	-0.433	-0.466	0.0807
0.122	-0.75	-1.73	1.14	0.379	-0.63	-0.939		-1.97	-0.404	-0.399	-0.343	0.167
0.0749	-1.64	-1.22	0.63	1.08	-0.344	-1.21		-0.851	0.682	-0.678	-0.439	0.138
0.134	-1.27	-0.703	0.713	1.39	-0.171	-1.32		-1.14	-0.309	-0.601	0.169	0.263
0.0391	-1.41	-1.12	0.682	0.53	0.166	-1.14		-2.48	-0.0115	-0.684	1.52	-0.318
0.0426	-1.01	-0.0968	0.945	-0.256	0.955	-1.34		-0.949	-1.75	-1.02	0.825	-0.967
-0.0134	-1.93	-0.00407	0.0686	0.933	1.4	-1.52		-0.887	-0.355	-1.06	0.793	-0.149
-0.0196	-1.36	0.105	0.325	0.0691	1.57	-1.31		-1.4	-0.606	-1.2	0.545	-1.53
-0.0736	-1.28	0.327	0.656	0.359	1.12	-1.65		-0.74	0.427	-1.21	0.365	-0.698
-0.12	-0.936	0.577	-0.671	0.957	0.61	-1.3		-0.856	-0.102	-1.25	-0.118	-0.701
-0.0226	-1.29	0.692	1.01	-0.114	-0.174	-0.884		-0.469	-0.0575	-0.973	0.0245	-0.00987
-0.155	-1.39	-1.45	0.85	0.308	-0.664	-1.72		0.383	-1.01	-1.37	0.391	-0.504
-0.127	-1.64	-0.639	0.314	0.584	-0.51	-1.15		-0.575	0.155	-1.09	-0.0203	0.278
-0.0842	-1.51	0.553	0.488	0.484	0.166	-0.881		-0.974	-0.0786	-1.38	0.591	1.27
-0.12	-1.07	-0.869	-0.132	-0.168	0.536	-1.75		-0.431	-0.297	-0.426	0.725	0.39
-0.204	-1.39	-0.65	1.26	0.0678	-1.22	-1.41		-0.751	-1.71	-0.739	0.525	0.675
-0.247	-1.17	-0.201	1.39	0.487	-0.819	-1.14		-0.857	0.197	-0.603	-0.0614	-0.185
-0.336	-1.06	-0.861	0.561	0.713	-0.443	-1.4		-0.0906	-0.297	-0.861	0.207	-0.437
-0.329	-0.707	-1.6	-0.0846	0.859	0.217	-1.47		-0.52	0.504	-1.33	0.385	-0.33
-0.256	-1.07	-0.92	0.43	0.54	-0.385	-1.97		-0.139	-1.15	-1.32	0.813	-0.674
-0.28	-0.906	0.773	0.377	-0.136	-0.168	-2.17		-0.0891	0.0625	-1.17	2.01	-0.319
-0.281	-0.662	0.668	0.739	-0.488	-0.852	-1.97		-0.0107	-0.924	-0.754	3.79	-0.957
-0.257	-0.862	-0.263	1.11	0.536	-1.16	-1.51		-0.747	-0.212	-1.13	3.7	-0.094
-0.368	-0.988	-0.791	1.28	-0.119	-0.481	-1.5		-0.732	-0.254	-1.24	3.14	-0.9
-0.309	-0.385	-0.397	0.992	0.0501	-1.03	-1.24		-0.459	-0.64	-0.837	3.6	0.0816
-0.39	-0.566	0.128	1.21	1.29	-1.27	-2.54		-0.166	-0.538	-1.19	2.51	0.115
-0.357	-0.548	0.135	0.562	-0.16	-0.585	-1.77		0.194	0.00886	-0.868	1.91	-0.205
-0.411	-0.693	-0.796	0.798	0.237	-0.854	-1.13		0.629	1.12	-1.47	2.52	0.0215
-0.383	-0.563	-1.09	1.05	0.377	-1.17	-0.914		0.639	0.868	-1.53	1.71	0.253
-0.33	-0.5	-0.758	0.153	0.46	-1.45	-1.22		0.363	1.72	-1.23	1.23	0.657
-0.308	-0.455	-1.2	0.251	0.168	-0.436	-0.906		-0.0963	-0.384	-1.26	1.59	0.631
-0.374	-0.563	-1.19	0.0876	-0.0635	-1.11	-1.06		0.518	0.21	-1.88	0.675	-0.402
-0.304	-0.649	-0.955	0.514	0.367	-1.32	-1.41		0.11	-0.728	-1.47	0.557	-0.364
-0.456	-0.772	-1.62	0.283	-1.26	-1.93	-1.69		0.548	-0.873	-1.48	0.626	0.222
-0.511	-0.66	-1	-0.506	-0.377	-1.63	-0.965		0.0736	0.186	-1.64	0.432	-0.464
-0.485	-0.61	-1.78	0.14	0.492	-0.775	-0.671		0.332	0.149	-1.33	0.00623	-1.18
-0.502	-0.631	-1.29	0.767	0.0224	-0.918	-1.57		-1.64	-0.327	-1.72	0.432	-1.15
-0.474	-0.666	-1.45	-0.724	0.516	-1.28	-1.24		-1.38	-0.873	-0.954	0.79	-0.442
-0.426	-1.07	-0.877	0.925	1.01	-0.418	-1.54		-1.06	0.462	-1.23	0.24	0.722
-0.574	-0.561	-0.729	0.472	-0.0348	-0.526	-1.66		-1.09	0.615	-1.15	0.329	0.264
-0.41	-0.852	-1.07	-0.497	-0.243	-1.42	-1.34		-1.1	0.512	-1.69	0.647	0.533
-0.481	-1.03	-0.252	-0.0499	0.768	-1.26	-1.84		-1.18	0.988	-1.55	0.332	-0.011
-0.514	-0.744	-1.2	-0.134	0.591	-2.3	-0.682		-1.59	0.64	-1.39	0.0256	0.0162
-0.621	-0.599	-0.0427	-0.12	0.523	-1.75	-1.32		-1.12	0.149	-1.27	-0.0706	0.0588
-0.569	-0.954	-0.198	-0.168	1.14	-1.72	-1.51		-0.858	1.21	-2.18	0.202	0.453
-0.533	-0.816	-0.349	-0.0954	0.659	-1.38	-1.92		-0.908	-0.784	-1.75	-0.21	-0.132
-0.541	-0.649	-1.12	0.743	2.75	-1.35	-1.58		-0.378	1.64	-1.14	-0.013	0.0581
-0.663	-0.433	-0.664	0.0111	0.0246	-1.83	-1.21		-0.442	0.703	-1.48	-0.0538	-0.289
-0.676	-0.346	-1.66	-0.542	1.02	-1.47	-1.75		-0.632	0.759	-0.482	0.553	-0.811
-0.644	0.254	-1.62	-0.89	0.902	-1.12	-0.32		-0.129	-0.0854	-0.72	0.762	-1.42
-0.67	0.143	-1.22	-0.749	0.125	-0.966	-1.64		0.364	0.857	-0.403	2.1	-0.393
-0.641	0.292	-0.542	-0.564	0.302	-0.73	-0.764		-0.579	1.32	-0.546	2.75	0.0195
-0.703	-0.525	-1.06	0.438	-0.713	-0.727	-1.62		-1.33	-0.165	-0.821	3.28	0.494
-0.732	-1.8	-0.224	0.294	0.373	0.675	-1.4		-1.04	0.058	-0.393	2.09	0.686
-0.706	-1.41	-0.532	0.32	2.04	-0.286	-1.43		-0.199	-0.41	-0.276	1.79	-0.0631
-0.714	-0.823	-0.218	0.175	0.853	-0.479	-0.632		-0.399	-0.0655	-0.198	1.96	-1.24
-0.654	-0.643	-0.729	-0.121	-0.239	-0.349	-0.735		0.602	0.409	0.575	2.12	0.1
-0.731	-0.873	-0.354	-0.783	0.0397	-0.384	-0.804		0.0309	1.07	0.0241	2.41	0.845
-0.702	-0.963	-1.7	-0.495	-0.234	-0.363	0.116		-0.0566	1.4	0.00149	2.03	-0.231
-0.699	-0.635	-1.53	-0.898	1.2	-0.389	-0.0917		-0.622	0.774	0.18	0.799	0.531
-0.693	-0.544	-1.49	0.503	0.836	-0.489	-0.598		-0.395	1.22	0.174	0.00476	-0.159
-0.771	-0.675	-0.693	-0.854	-0.164	-0.923	-0.49		-0.769	0.963	0.175	0.493	0.0744
-0.72	-0.449	-0.117	0.408	-0.542	-0.0536	-0.266		-0.0834	0.454	0.229	0.619	-0.34
-0.644	-0.685	-0.581	-0.6	0.741	-0.381	-0.281		1.3	1.68	-0.0103	0.288	-0.811
-0.681	-0.368	-1.18	-0.695	-0.0222	-1.04	-0.437		0.45	0.961	0.144	0.361	-0.747
-0.705	0.208	-1.07	-1.25	0.959	-1.49	0.087		-0.231	1.27	0.306	0.226	0.769
-0.68	0.227	-1.21	-0.395	1.24	-0.742	0.52		-0.967	0.0939	-0.347	0.474	1.43
-0.673	0.362	-2.14	-0.0293	-0.965	-0.685	0.478		-1.05	1.67	-0.39	-0.495	1.16
-0.718	0.233	-0.24	0.162	0.844	-0.468	-0.0361		-1.83	0.0387	-0.61	0.147	-0.0358
-0.742	0.406	-0.756	0.767	1.37	0.306	-1.04		0.212	0.86	0.205	-0.48	-0.353
-0.767	0.0398	0.183	-0.0973	0.862	0.61	-0.617		-0.619	0.975	-0.276	-0.448	-0.0463
-0.872	-0.0232	-0.894	-0.313	0.372	0.152	-0.132		-1.13	1.86	-0.391	-0.744	-1.05
-0.828	0.473	-2.24	0.0503	1.18	-0.258	-0.909		0.108	1.79	-0.622	-0.455	-0.441
-0.801	0.405	-0.526	0.599	-0.0422	0.544	0.444		-0.541	0.62	-0.42	-0.934	0.959
-0.811	-0.844	-1.43	0.488	-0.034	-0.64	0.753		-0.834	-0.434	0.0575	-0.614	0.891
-0.83	-0.265	-0.776	0.375	0.0096	-0.207	0.224		-0.731	1.04	-0.0558	-0.481	0.53
-0.808	-0.66	-2.07	0.765	0.656	-0.342	0.168		-0.879	0.239	-0.274	-0.325	0.258
-0.869	-0.59	-0.899	-0.0685	1.28	-0.434	0.667		0.425	0.386	-0.279	-0.303	-1.69
-0.849	0.0692	-1.53	0.714	-0.284	-0.337	0.771		0.213	1.18	-0.417	-0.204	-0.035
-0.93	0.33	-0.893	0.422	0.104	-1	0.374		-0.975	0.104	-0.568	0.173	-1.36
-0.868	0.29	-1.56	-0.387	-1.03	-1.37	-0.568		-0.578	-0.597	-0.374	-0.736	0.633
-0.811	0.0486	-0.325	0.366	1.44	-1.48	-0.483		-0.0699	-0.246	-0.308	-0.569	1.38
-0.851	0.267	-0.717	-0.302	1.33	-1.53	0.101		-1.79	1.97	-0.26	-0.0618	-0.0116
-0.89	0.244	-0.717	-0.33	1.11	-1.34	0.389		-1.91	0.486	-0.131	-0.551	-0.547
-0.797	0.337	0.4	0.065	-0.522	-0.386	0.0857		-1.15	1.29	0.506	-1.18	-0.254
-0.903	0.269	0.167	-0.06	0.198	-0.932	0.273		-0.804	1.06	0.331	-0.891	0.299
-0.94	0.307	-1.48	-0.865	-1.47	-1.39	0.142		-1.36	-0.364	0.623	-0.783	0.558
-0.881	0.331	-0.587	-0.312	-0.585	-1.49	-0.243		-1.07	0.998	0.804	-1.11	-1.27
-0.863	0.698	-1.64	-0.0335	-1.5	-0.602	0.116		-0.831	0.0441	0.66	-0.395	-0.623
-0.935	0.168	-0.712	-0.0758	-1.17	-1.75	0.0155		-0.291	0.431	0.418	-0.0518	-0.591
-0.939	0.324	-1.19	-0.107	-1.49	-0.737	-0.348		-0.696	0.41	0.636	-0.024	0.271
-0.886	0.26	-1.15	0.00265	-0.706	-0.796	0.0295		-0.727	-0.19	0.523	-0.243	0.877
-0.871	0.359	-0.631	0.474	-1.53	-0.26	-0.471		-0.031	0.941	0.385	-0.548	0.287
-0.95	0.346	0.108	-0.612	-1.74	-0.608	-0.943		-0.41	1.81	0.621	-0.684	0.113
-0.979	0.261	-1.28	-0.645	-0.762	-0.25	-0.524		-0.323	1.43	-0.0388	-1.13	-0.764
-1.04	-0.182	-1.89	0.484	-1.82	0.0185	-1.45		-0.921	-0.381	0.314	-0.679	-0.101
-0.874	0.353	-0.699	-0.273	-0.891	-0.962	-1.54		-0.531	1.22	0.029	-0.483	0.71
-1.01	-0.0972	0.139	0.313	-0.92	-1.01	-2.19		-0.908	1.5	-0.708	-0.896	0.848
-0.987	-0.0689	-0.978	0.646	-0.588	-0.61	-1.21		0.138	0.973	-0.0576	-1.05	0.218
-1.03	-0.102	-1.67	-0.0992	-1.7	-1.69	-0.887		0.605	0.797	-0.0657	-0.587	1.58
-0.973	0.0962	-0.0149	-0.424	-1.94	-1.62	-0.562		0.244	0.459	0.165	-0.0146	0.725
-1.03	-0.0828	-0.482	-0.327	-1.42	-0.192	-0.289		0.324	-1.16	0.489	1.42	-1.13
-1	0.764	-1.02	0.19	-0.928	-0.465	-1.88		-0.0434	0.158	0.192	1.77	-1.49
-1.01	0.297	-0.167	0.845	-0.831	-0.326	-2.27		-0.996	0.773	-0.339	1.58	-0.648
-1.07	0.402	-1.69	0.759	0.392	-1.5	-0.744		-0.557	-1.02	-0.313	1.08	-0.239
-0.984	1.01	-0.847	0.671	-1.09	-1.5	-0.0623		-1.48	0.943	-0.218	0.28	0.25
-1.07	0.518	-0.59	0.167	-2.07	-3.2	-0.246		-1.58	1.62	-0.0895	-0.307	0.226
-1.05	0.567	-0.613	-0.142	-1.48	-2.99	-0.379		-0.246	0.776	-0.271	-0.798	-1.35
-1.06	0.997	-0.0405	0.0414	-2.8	-1.28	0.115		-2.21	0.238	0.118	-0.653	-1.85
-1.11	1.06	-0.157	0.347	-1.57	-2.04	-0.317		-1.2	0.244	-0.65	-0.368	-1.04
-1.04	1.26	-0.349	-0.11	-0.702	-0.464	-0.0156		-0.789	0.284	-1.14	0.619	-1.09
-1	1.44	-0.786	-0.268	-1.94	0.0316	-0.531		-0.834	0.663	-0.456	1.95	-0.542
-1.09	1.71	0.17	0.101	-1.5	-0.402	-0.0878		-0.306	1.91	-0.869	2.97	-0.822
-1.09	1.36	-0.542	-0.695	-1.8	-0.873	-1.06		-0.232	1.44	-0.755	3.07	-1.05
-1.06	1.61	0.329	-0.905	-1.06	-1.1	-1.29		-0.133	0.757	-0.91	2.93	-0.79
-0.945	2.17	-0.632	-0.193	-2.06	-0.776	-0.977		-0.339	0.675	-1.13	2.52	-1.42
-1.06	1.92	-0.324	0.143	-0.93	-0.69	-0.58		-1.13	0.47	-1.01	2.39	-2.36
-1.09	2.14	1.66	-0.0216	-2.57	-1.15	-0.594		-0.398	0.211	-1.04	2.33	-2.53
-1.05	2.8	0.847	-0.52	-1.16	-0.767	-0.792		-0.568	-0.966	-0.806	1.77	-0.717
-1.06	2.15	-0.377	0.147	-1.33	-1.11	-0.47		-0.723	0.272	-0.968	1.64	-0.208
-1.06	2.33	-0.158	-0.521	-1.27	-0.835	-0.23		-0.0969	1.77	-1.02	1.16	-0.596
-1.05	2.44	0.186	-0.244	-1.36	-0.831	-1.13		-0.176	1.96	-0.785	0.373	-0.499
-1.07	2.3	0.339	-0.0576	-1.97	-0.36	-0.616		-0.184	1.25	-0.908	-0.38	-0.698
-1.02	2.81	0.888	-1.17	-2.13	-0.643	-0.625		0.315	0.638	-0.747	1.28	1.04
-1.01	2.57	-0.382	-1.2	-1.46	-0.535	-0.722		0.527	0.295	-0.952	2.31	-0.201
-1.02	2.78	0.923	-1.02	-0.776	0.311	-0.348		1.29	0.969	-0.707	1.6	-0.359
-1.04	2.5	-0.264	-0.686	-2.25	-0.847	-0.211		2.87	0.0368	-0.518	1.45	0.143
-1.16	2.46	0.764	-0.782	-0.405	-1.34	-1.22		1.95	0.932	-0.388	1.22	-0.0676
-1.06	2.61	1.32	-0.786	-0.324	-0.946	-0.173		1.98	0.753	-0.926	1.25	-0.632
-1.12	2.29	1.32	-0.939	-0.842	-1.03	-0.787		0.369	-0.24	-1.06	1.03	0.759
-1.01	2.15	0.538	-1.02	-0.563	-0.758	-0.385		0.845	0.53	-0.556	0.996	-0.209
-1.05	2.54	0.818	-0.978	-1.02	-0.21	-0.141		1.18	0.866	-0.426	1.43	-0.446
-1.07	1.64	0.688	-1.31	-0.273	-0.987	-0.506		1.26	0.27	0.211	1.05	1.46
-1.01	1.41	2.93	-0.908	-0.243	-0.197	0.257		0.649	0.599	0.0615	1.15	-1.12
-1.03	0.824	2.38	-1.22	0.538	-1.37	0.0302		0.45	-0.864	-0.222	0.847	0.129
-1.02	0.99	1.38	-0.98	-1.02	-1.75	-0.229		1.71	1.34	-0.597	1.1	1.48
-1.1	1.07	1.94	-1.86	0.0699	-1.11	-0.865		1.78	0.0155	-0.189	1.39	1.27
-1.2	1.09	1.8	-0.869	-0.652	-0.545	-1.35		1.6	0.589	0.324	1.96	0.532
-1.07	0.663	1.43	-1.24	-0.958	-0.551	0.355		2.22	1.53	1.53	0.818	-1.05
-1.08	1.11	1.88	-0.497	-1.7	0.136	-0.162		1.1	0.692	2.78	0.165	-1.15
-1.16	1.3	1.98	-1.29	-0.589	0.167	0.0582		0.737	0.447	3.27	0.558	-2.35
-1.12	0.778	0.917	-0.931	-0.426	0.0454	-0.555		0.22	1.02	3.59	0.609	-1.89
-1.16	1.02	1.22	-1.35	-0.674	0.367	-0.0956		-0.0387	-0.262	3.16	0.988	0.333
-1.23	1.31	0.771	-0.768	-0.785	0.828	0.118		0.487	0.394	3	0.51	1.16
-1.11	1.71	0.908	-1.08	-0.084	1.01	-0.158		0.99	-0.0534	2.68	0.11	3.56
-1.13	1.44	0.818	-0.56	1.77	0.427	0.187		-0.14	0.0326	2.79	-0.157	1.29
-1.05	1.44	2.22	-1.18	0.213	0.737	0.474		-1.26	-0.303	2.83	-0.311	-0.938
-1.17	1.2	0.764	-0.954	-0.29	0.203	0.377		0.152	0.303	3.06	-0.0863	0.736
-1.17	1.7	2.15	-0.323	-0.741	0.248	0.329		0.408	0.553	2.4	0.185	0.498
-1.15	1.54	1.33	0.183	-0.431	-0.302	0.71		0.384	0.0957	2.37	-0.264	-0.285
-1.18	1.79	1.67	-0.82	0.251	-0.638	0.0783		1.06	1.12	2.15	0.00406	2.17
-1.18	1.67	0.785	-1.17	0.284	-0.605	-0.104		0.737	1.21	1.76	0.264	0.985
-1.21	1.58	1.82	-1.62	-0.432	0.578	-0.351		-0.527	1.42	2.19	0.285	1.74
-1.26	1.71	1.44	-1.8	0.827	0.612	-0.0861		0.977	0.803	1.63	1.17	0.531
-1.26	1.7	1.01	-1.16	0.281	0.375	-0.165		0.498	0.533	1.79	1.28	0.997
-1.32	1.36	0.966	-1.07	-0.175	1.15	-0.51		0.303	0.183	1.13	1.43	2
-1.3	1.21	1.29	-1.28	-0.363	0.605	0.14		0.35	0.215	1.72	0.591	1.36
-1.24	1.13	1.76	-0.573	-0.811	0.236	-0.144		-0.0971	1.35	1.74	0.0327	-0.246
-1.33	1.52	1.73	-1.52	1.1	0.517	-0.118		0.814	-0.379	1.56	0.286	-0.974
-1.33	1.31	2.39	-2.04	-0.727	0.484	-0.127		-0.622	1.01	1.3	-0.1	-1.37
-1.33	1.44	1.89	-1.28	-0.138	0.537	0.202		-0.164	-0.498	1.51	-0.207	-1.33
-1.33	0.811	1.23	-1.3	0.803	0.107	0.537		-0.507	1.01	1.56	0.399	-1.3
-1.29	1.18	1.65	-1.84	0.251	0.663	-0.297		-0.759	-0.33	1.53	0.212	-0.624
-1.32	1.5	2.54	-1.64	-1.63	0.512	-0.065		-0.975	-0.0886	1.25	-0.0644	0.521
-1.3	1.76	2.81	-1.48	-0.0721	0.515	0.193		-1.09	-0.452	1.28	-0.335	0.676
-1.28	1.67	1.45	-1.53	0.474	0.393	-0.21		-0.843	0.387	1.53	-1.2	-1.27
-1.21	1.37	2.46	-1.32	0.347	0.31	-0.244		-0.238	0.744	1.7	-0.913	-2.15
-1.23	1.33	1.38	-1.73	-0.813	0.411	0.0298		-0.234	-0.541	1.61	-0.731	-2.01
-1.25	1.35	2.1	-1.88	0.217	1.23	-0.399		0.579	0.474	1.87	-0.722	-0.496
-1.25	1.31	0.682	-2.39	0.188	-0.394	0.514		-0.281	-0.213	1.47	-1.5	-0.128
-1.24	1.15	0.363	-1.81	0.385	0.331	0.385		0.191	-0.0684	1.21	-1.19	0.106
-1.35	1.44	0.648	-2.03	0.301	-0.517	0.551		-0.748	0.371	1.02	-1.68	0.374
-1.26	1.17	0.512	-1.05	-0.393	0.0752	0.417		-0.46	-0.19	0.652	-1.59	-0.0229
-1.31	1.22	2.2	-0.733	0.541	0.495	0.244		-0.318	0.726	0.945	-1.75	-0.484
-1.39	1.28	1.45	-1.31	-0.379	-0.615	0.0908		-0.354	0.956	0.768	-2.2	-1.52
-1.39	1.43	1.28	-1.63	0.409	-0.0425	0.00191		-0.901	1.1	0.262	-1.28	-2.47
-1.39	1.02	0.118	-1.95	-0.935	1.02	0.187		-1.46	-0.98	0.554	-1.71	-2.09
-1.29	0.984	1.34	-1.64	-0.329	0.498	0.935		-1.03	1.53	0.128	-1.63	-1.99
-1.38	1.01	1.06	-2.09	0.541	-0.187	0.193		-0.974	-0.847	0.938	-1.17	0.344
-1.33	1.5	2.16	-1.99	-0.92	0.96	-0.224		0.442	0.362	1.52	-1.33	0.487
-1.32	1.33	1.72	-1.88	1.27	1.47	-0.475		-0.00308	1.04	0.961	-1.02	-0.828
-1.4	1.54	1.9	-1.42	0.786	1.45	-0.0034		0.12	1.07	1.33	-1.56	-0.796
-1.41	1.69	1.35	-1.64	-0.441	2.22	0.353		2.14	0.68	1.23	-1.3	-0.919
-1.37	1.5	0.511	-2.12	-0.824	1.09	-1.18		0.133	-0.377	1.39	-1.71	-1.07
-1.41	1.65	1.94	-1.8	-0.391	0.814	0.0928		1.02	1.16	0.989	-1.22	-0.708
-1.57	1.47	2.91	-1.63	-0.0963	0.993	0.0973		-0.153	1.59	0.947	-1.48	-0.11
-1.46	1.54	2.09	-2.84	-0.388	0.182	0.0401		-0.14	1.32	0.904	-2.1	-1.28
-1.38	1.67	1.3	-1.67	0.395	0.434	-0.422		-0.412	0.0445	0.789	-1.78	-0.702
-1.39	1.71	1.89	-1.04	0.708	0.0408	-1.02		-0.842	0.222	0.641	-0.875	0.692
-1.38	1.69	1.61	-1.08	-1.16	0.338	-1.29		-0.0802	0.18	0.101	-1.13	-1.16
-1.4	1.85	0.758	-1.46	-0.201	0.626	0.0142		-0.524	0.231	0.281	-0.954	-0.755
-1.38	2.04	1.23	-1.51	-0.0555	0.737	-0.586		-0.179	0.823	-0.177	-1.31	0.516
-1.44	1.96	1.65	-2.17	-0.988	1.1	-0.318		0.913	0.908	0.198	-1.35	-0.946
-1.31	2.21	1.5	-1.48	-0.595	0.464	-0.652		1.35	0.382	0.263	-1.32	0.705
-1.42	2.05	1.84	-1.78	0.00416	0.178	0.09		-0.478	0.368	0.0915	-0.796	-0.512
-1.48	1.97	1.4	-1.33	-0.991	0.958	-0.545		0.953	0.841	-0.146	-1.87	1.56
-1.48	2.31	1.68	-0.835	0.342	0.0559	-0.0771		0.00377	1.56	0.176	-0.707	0.0136
-1.43	2.11	0.73	-1.37	0.232	0.594	0.309		-0.313	0.929	0.717	0.0286	0.115
-1.4	2.34	3.52	-1.06	-0.471	0.933	-0.578		-0.807	1.58	1.14	-0.202	0.927
-1.47	1.4	1.72	-0.827	-0.172	0.636	-0.516		-0.0976	1.89	2.31	-0.581	1.21
-1.38	1.63	1.76	-0.804	-1.39	0.138	-0.86		-0.236	1.46	3.47	-1.28	0.873
-1.5	1.68	2.73	-0.966	0.0743	0.744	-1.24		-0.444	0.204	3.33	-1.39	0.127
-1.52	1.75	1.05	-1.81	-0.118	0.678	-1.33		-0.479	-0.117	2.96	-0.991	-1.14
-1.49	1.7	1.03	-0.835	0.786	0.362	-0.944		-0.328	0.306	3.17	-0.65	0.524
-1.41	1.82	2.91	-0.751	0.172	0.921	-1.37		-0.156	0.788	2.85	-0.375	-0.471
-1.42	1.84	0.148	-1.11	0.034	0.838	-1.16		-0.475	1.36	2.77	-0.588	0.328
-1.42	1.7	0.35	-0.699	1.26	0.908	-1.19		-0.937	0.189	2.47	-1.51	1.12
-1.51	1.64	0.0561	-0.0664	0.109	1.36	-1.11		-0.0232	0.451	2.09	-1.72	0.224
-1.44	1.14	-0.139	-0.295	-0.422	1.21	-1.8		-0.205	-0.987	2.03	-1.13	-0.455
-1.48	1.21	-0.779	-0.162	0.535	0.709	-1.47		-0.762	0.399	1.77	-0.603	-0.2
-1.43	1.24	-1.15	-0.745	0.54	0.46	-1.2		-0.779	0.903	1.93	-0.844	0.31
-1.52	1.3	0.285	-0.46	-0.145	0.154	-0.956		-0.982	1.06	1.86	-1.43	-0.227
-1.52	1.34	-1.13	-0.606	0.53	0.113	-1.3		-0.0842	0.166	2.14	-1.63	-0.712
-1.6	1.39	-1.25	-0.535	1.07	-0.221	-0.863		-0.848	1.29	1.76	-1.55	0.392
-1.53	0.88	-1.93	-1.2	-0.0347	0.287	-0.914		-0.377	0.284	1.67	-1.37	0.232
-1.53	0.761	-0.07	-0.765	0.28	0.57	-1.14		-0.885	1.08	1.56	-1.26	0.0417
-1.53	1.25	-0.168	-1.21	-1.13	0.0845	-0.985		-1.51	-0.269	1.61	-0.836	1.09
-1.56	1.28	-0.55	-0.939	-1.72	-0.226	-1.25		-1.15	-0.716	1.95	-0.00369	0.374
-1.5	0.909	-1.29	-0.798	1.87	-0.363	-1.25		-0.848	0.535	1.58	0.952	-1.07
-1.59	0.775	-1.44	-1.05	0.903	0.25	-0.77		-0.607	0.933	1.29	0.93	-1.29
-1.63	0.415	-0.845	-0.367	-0.135	-0.279	-1.24		-0.0155	-0.188	1.49	1.56	-2.04
-1.65	-0.224	-2.21	-0.0197	0.556	-0.157	-0.698		-1.06	0.0177	1.32	1.91	0.297
-1.56	-0.412	-1.36	0.0677	0.0514	0.192	-0.88		-1.67	-0.56	1.35	1.3	0.0158
-1.5	-0.502	-0.899	0.256	-0.0321	0.104	-0.445		-1.81	0.961	1.67	1.58	-0.014
-1.41	-0.58	-0.844	-0.245	-0.237	1.25	-0.219		-1.13	-0.785	1.87	1	-0.0204
-1.49	-0.552	-0.959	0.626	-0.478	0.487	-1		-1.04	-0.732	1.94	1.26	-0.242
-1.42	-0.782	-1.49	-0.346	-1.1	0.446	-1.07		-1.65	0.581	1.25	0.461	0.459
-1.48	-0.619	-1.84	0.497	0.861	0.848	-0.788		-1.02	-0.135	1.03	0.605	0.813
-1.44	-0.885	-1.43	0.00664	-0.11	0.8	-0.491		-2.09	0.0749	1.41	0.424	0.38
-1.38	-0.849	-1.25	0.616	0.489	0.232	-1.02		-2.01	-0.0305	1.41	0.0545	0.964
-1.34	-0.737	-1.44	1.25	1.02	0.946	-0.752		-1.72	-0.434	1.39	-0.616	0.764
-1.43	-0.595	-1.13	0.409	0.315	0.529	-0.293		-1.95	0.704	1.24	-0.294	0.412
-1.46	-0.215	-0.17	0.983	-0.734	0.661	-0.379		-0.7	0.77	0.581	-0.544	1.09
-1.44	-0.682	-0.366	0.612	0.177	0.722	-0.587		-1.41	0.409	0.694	-0.0505	0.621
-1.46	-1.07	-0.934	0.806	0.425	0.109	-0.466		-1.39	-0.0871	0.409	-0.605	-0.702
-1.58	-0.796	-1.81	0.813	0.464	1.41	0.488		-1.14	0.633	0.698	-0.283	-0.659
-1.5	-0.447	-1.98	0.337	-0.593	0.456	-0.0848		-1.13	-0.0462	1.35	-0.354	-1.55
-1.45	-0.736	-1.93	1.17	0.236	0.623	-0.415		-0.934	-0.672	1.45	-0.097	-0.891
-1.46	-0.956	-1.41	1.59	-0.859	0.283	-0.581		-0.34	0.241	1.53	0.0347	-0.749
-1.6	-0.786	-1.95	0.731	0.194	0.289	-0.736		-1.15	0.0268	0.753	-0.0789	-0.671
-1.54	-0.851	-1.32	0.432	-0.175	0.412	-0.174		-1.76	0.428	0.768	-0.413	0.0856
-1.57	-0.602	-1.34	1.22	-0.676	-0.178	-0.545		-1.33	0.597	0.616	-1.45	0.0315
-1.57	0.117	-1.9	1.35	-0.0253	-0.819	-0.627		-0.795	0.642	0.753	-1.45	-1.56
-1.59	-0.229	-1.52	1.26	-0.541	-0.033	-0.829		-1.52	0.502	0.675	-0.603	-0.483
-1.56	-0.261	-1.04	2.03	0.18	0.54	-0.119		-0.582	-0.932	0.642	0.621	-0.422
-1.5	-0.295	-1.9	1.62	0.00275	0.278	-0.14		-1.51	0.456	0.76	0.159	0.567
-1.53	-0.561	0.0527	0.473	-0.528	0.203	-0.641		-1.43	-0.152	1.24	-0.25	-0.614
-1.63	-0.409	-1.05	0.638	0.829	0.183	-0.169		-0.922	-0.338	1.1	0.308	-0.514
-1.54	-0.345	-0.332	0.591	-0.645	0.0663	-0.24		-0.911	-0.012	0.772	-0.191	-0.449
-1.51	-0.441	-1.91	1.95	0.608	0.142	-0.649		-1.6	-0.632	1.32	0.282	-0.234
-1.57	-0.256	-0.506	1.89	0.667	-0.187	-0.192		-1.17	-0.472	0.7	0.0224	-0.391
-1.59	-0.477	-0.134	2.38	0.629	-0.0305	0.156		-1.53	-0.146	0.898	-0.904	-0.713
-1.57	-0.424	-1.32	2.11	0.605	-0.356	-0.215		-1.41	-0.454	0.545	-0.369	-0.823
-1.63	0.36	-1.06	2	0.547	0.319	-1.11		-0.769	1.24	0.52	-1.02	0.129
-1.5	-0.203	-1.59	2.23	-0.113	-0.175	-0.697		-1.55	-1.09	0.562	-0.594	1.01
-1.48	0.137	-0.874	1.75	-0.168	0.0275	-1.25		-1.31	0.884	0.36	-0.953	-0.0577
-1.56	-0.155	-0.986	1.58	-0.0224	0.131	-0.192		-1.17	0.0416	0.454	-0.852	-1.65
-1.52	0.0529	-1.57	2.26	-0.975	0.67	-0.235		-1	1.32	0.676	-0.404	0.955
-1.62	-0.152	-2.39	1.55	0.286	0.527	-0.694		-2.56	0.322	0.333	-0.564	-0.894
-1.44	0.175	-1.57	1.54	-0.506	-0.701	0.202		-1.43	-0.402	0.583	-0.354	0.253
-1.48	0.0758	-1.91	1.09	-1.85	-0.616	-0.214		-1.15	1.21	0.731	0.00333	-0.69
-1.47	0.0471	-0.745	0.782	-0.577	-0.753	-0.368		-1.81	1.52	0.46	0.382	-0.631
-1.45	0.213	-0.361	0.19	-0.34	-1.19	-0.236		-1.99	-0.00579	-0.119	-0.0882	-0.0586
-1.44	-0.272	-1.81	0.05	-0.274	-0.869	0.111		-1.48	-0.513	0.192	-0.397	0.503
-1.47	-0.391	-1.84	1.92	-0.827	-1.19	-0.544		-1.04	0.37	0.742	0.123	-0.751
-1.38	-0.428	-1.64	1.02	-0.714	-0.726	-0.39		-0.482	-0.372	0.3	-0.313	-0.679
-1.37	0.00212	-1.93	0.553	-0.754	0.221	-0.533		-1.61	-0.779	0.607	0.204	-0.641
-1.51	0.0808	-0.115	0.435	-0.0824	-0.0871	-0.375		-1.98	0.718	0.976	-0.551	-0.343
-1.47	-0.323	-1.7	0.458	-0.539	-0.0891	-0.697		-1.24	0.226	0.588	-0.65	-1.6
-1.43	0.0662	-1.3	0.443	-0.195	-0.236	-1.27		-1.05	-0.172	0.161	-1.25	-0.199
-1.35	-0.358	-2.29	0.505	0.383	0.107	-1.15		-1.03	-0.937	-0.0313	-0.939	-0.173
-1.38	-0.505	0.329	0.896	-0.245	-0.437	-1.59		-1.03	0.809	0.239	-1.03	-0.209
-1.42	-0.711	-0.459	0.47	-1.08	-0.299	-2.12		-2.9	-0.454	0.429	-1.02	0.934
-1.4	-0.553	-0.202	0.7	-0.309	-0.506	-1.98		-2.75	-0.269	-0.11	-0.761	0.701
-1.35	-1.37	-1.41	0.372	0.161	-0.948	-1.43		-2.81	1.89	-0.0566	-0.431	-0.216
-1.26	-1.01	-2.23	-0.104	1.61	-0.257	-1.88		-1.67	1.78	0.337	-0.139	-1.52
-1.31	-0.751	-1.1	0.249	-0.634	-0.391	-1.14		-1.47	0.0432	0.306	-0.351	0.091
-1.27	-1.21	-0.489	0.243	-0.638	0.00445	-2.24		-1.56	0.00564	0.178	-0.293	-0.591
-1.28	-1.11	-1.13	0.547	-1.41	-0.82	-1.39		-2.35	0.0682	-0.155	0.0456	0.0568
-1.36	-1.08	-0.35	0.163	-0.0968	-0.442	-2.16		-2.13	0.894	-0.267	0.174	0.827
-1.39	-0.999	-0.806	0.128	-1.66	-0.574	-1		-1.62	-0.461	-0.461	0.262	-1.93
-1.41	-0.855	-0.619	0.878	-0.534	0.611	-1.63		-2.14	0.0576	-0.611	1.19	-1.26
-1.45	-0.831	-0.574	0.251	0.265	0.159	-1.39		-2.45	0.612	-0.0989	0.692	-1.75
-1.36	-1.24	-0.515	0.419	-0.326	-0.377	-2.43		-1.04	0.126	-0.398	0.325	-0.854
-1.37	-1.08	0.235	-0.303	0.0997	-0.585	-1.68		-1.21	0.658	-0.412	0.577	-1.84
-1.35	-0.918	-0.971	-0.0825	0.136	-0.421	-1.7		-1.61	0.447	-0.446	0.712	-2.2
-1.37	-0.679	-0.243	0.801	-0.426	-0.76	-1.93		-2.39	0.0787	-0.453	0.181	0.268
-1.48	-0.676	-0.995	0.431	0.204	-0.596	-1.73		-2.78	0.34	-0.342	0.369	-0.386
-1.44	-0.192	1.27	0.803	-0.00714	-1.44	-1.7		-2	-0.263	-0.852	1.28	0.186
-1.45	-0.306	1.24	1.35	-0.718	-1.05	-1.85		-0.328	-0.123	-0.696	0.771	-0.417
-1.41	-0.642	-0.235	0.597	0.16	-1.09	-1.96		-1.15	-0.354	-0.952	1.48	-0.156
-1.4	-0.424	0.0823	0.0966	0.224	-0.493	-2.29		-0.844	-0.156	-0.206	2.22	-0.445
-1.46	-0.111	1.84	-0.182	-0.0441	-1.21	-1.88		-0.767	0.483	-0.373	3.15	0.905
-1.4	-0.193	2.21	-0.567	0.848	-1.64	-2.05		-2.02	0.711	0.159	3.77	0.768
-1.48	-0.243	3.6	-0.213	0.28	-2.48	-2.11		-1.21	-1.48	0.576	4.25	-0.858
-1.32	-0.196	4.22	-0.629	-0.211	-1.92	-2.34		-0.913	0.419	1.76	2.92	-0.908
-1.26	0.0815	2.94	-0.496	0.623	-1.66	-1.38		-1.95	-1.66	1.2	2.08	-0.165
-1.31	0.321	2.41	-0.201	0.183	-1.83	-0.4		-1.78	0.454	0.39	2.44	-0.933
-1.3	0.431	3.52	-0.105	-0.806	-1.18	-1.16		-2.34	-0.271	0.478	1.91	-0.624
-1.31	0.34	3.75	-0.459	-0.179	-1.29	-1.31		-1.97	-0.0707	0.129	2.57	-0.167
-1.4	0.481	3.51	0.17	-1.75	-1.32	-0.606		-1.72	-1	0.00909	2.39	-0.314
-1.36	0.443	1.96	-0.225	-0.759	-1.81	0.0301		-1.77	-0.183	0.211	2.94	0.371
-1.39	0.385	2.99	-0.186	1.22	-1.92	-0.00851		-2.41	-2.58	-0.263	2.55	-0.56
-1.3	0.523	3.1	-0.742	0.733	-1.64	0.351		-1.63	-1.66	0.115	2.53	-0.719
-1.36	0.472	5	-0.73	0.108	-1.26	0.594		-1.91	-1.37	0.0439	3.04	-0.687
-1.39	0.452	3.01	-0.862	0.523	-1.44	0.528		-1.97	-0.427	-0.136	2.81	0.547
-1.35	0.352	2.5	-0.851	-0.425	-0.99	0.556		-2.66	-1.73	-0.213	2.57	-1.31
-1.25	0.467	3.95	-0.214	-0.0629	-2.15	0.327		-2.21	-1.52	-0.283	2.05	-1.38
-1.2	0.159	2.84	0.0251	-0.000964	-2.11	0.499		-2.12	-0.336	-0.235	2.6	-0.53
-1.28	0.28	3.04	-0.539	-0.4	-1.81	0.32		-1.22	-1.17	-0.644	2.33	-0.503
-1.3	0.285	2.98	-0.125	0.629	-1.5	0.695		-1.98	-1.1	-0.44	2.3	0.391
-1.22	0.799	2.65	-0.179	-0.439	-1.74	0.858		-1.28	0.496	-0.06	2.58	-0.421
-1.3	0.696	2.62	-0.401	0.172	-2.29	0.666		-2.78	-0.284	0.362	3.34	-0.689
-1.29	0.475	1.24	-0.974	0.976	-1.63	0.791		-2.04	-1.49	0.305	3.74	0.0787
-1.27	0.531	2.23	-0.0889	0.118	-1.89	1.02		-1.08	-0.494	0.00221	3.52	0.626
-1.3	0.195	1.15	-0.492	0.819	-0.837	0.939		-0.825	-0.187	0.236	3.64	-1.07
-1.25	0.276	0.935	-0.88	-0.266	-1.85	1.83		-1.16	-1.98	0.0483	4.01	-1.52
-1.25	0.634	0.388	-1.02	-1.14	-1.45	1.73		-1	-0.0437	0.512	3.91	0.504
-1.26	0.916	1.04	-1.18	-0.285	-1.68	1.4		0.174	0.707	0.255	3.37	0.413
-1.25	0.899	1.2	-0.816	-0.598	-1.51	1.49		-1.01	-0.533	0.658	3.59	-0.603
-1.31	1.04	1.5	-0.582	-0.361	-2.37	1.52		-0.204	-0.266	0.527	3.45	-0.985
-1.36	0.732	2.64	-0.737	0.808	-2.47	1.35		-1.64	-0.618	0.564	3.48	-0.218
-1.45	0.998	1.11	-1.15	0.499	-2.8	1.99		-0.431	-1.14	0.298	3.02	-0.618
-1.42	0.739	0.413	-0.419	-0.393	-2.33	1.74		-0.682	-0.128	0.518	3.33	0.125
-1.41	0.366	1.45	-0.579	0.929	-2.48	1.54		-1.28	-0.297	0.352	3.17	-0.485
-1.3	0.554	0.869	-1.07	0.0428	-2.6	1.48		-0.544	0.136	-0.237	4.28	-0.0544
-1.28	-0.052	1.09	-0.955	0.633	-2.4	0.929		-1.71	-1.14	0.453	3.53	0.459
-1.35	0.0175	0.407	-0.542	1.89	-2.57	1.2		-1.45	-0.528	0.29	2.32	0.227
-1.32	-0.00258	0.499	-0.117	1.21	-2.29	1.94		-1.68	0.0503	0.371	2.46	0.562
-1.27	-0.0364	1.13	-0.842	1.81	-2.52	1.82		-0.598	-0.125	0.333	2.09	0.36
-1.32	-0.0261	1.97	-0.716	1.39	-2.75	1.58		-1.94	0.0898	0.817	1.62	0.349
-1.37	0.103	2.37	-0.272	0.676	-2.73	1.96		-2	0.347	0.323	0.952	-0.0938
-1.36	0.329	0.05	-0.228	1.44	-2.13	2.04		-0.802	-0.716	0.444	1.25	0.743
-1.43	0.0224	1.47	0.11	-0.258	-2.76	1.49		-1.44	0.486	0.524	1.18	0.582
-1.42	0.163	0.723	0.15	0.0667	-2.19	1.58		-1.94	-0.187	0.513	1.16	-0.676
-1.58	0.162	0.617	0.512	-0.756	-2.84	1.92		-2.15	-0.525	-0.0485	1.8	1.46
-1.46	0.119	1.34	0.0926	0.331	-2.61	1.88		-1.56	-0.832	0.388	3.82	1
-1.37	0.0513	0.251	-0.159	0.199	-2.62	1.69		-1.48	-0.117	0.378	3.14	-0.0916
-1.27	0.347	1.07	0.188	0.593	-2.18	1.46		-0.882	0.961	0.436	3.93	-0.0943
-1.3	0.791	-0.00021	0.31	0.259	-2.47	1.13		-1.02	-1.13	0.137	4.29	1.05
-1.38	0.402	1.03	-0.304	0.401	-2.88	2.05		-0.579	-0.207	0.317	4.92	0.516
-1.41	0.367	-0.342	-0.0767	1.56	-2.32	0.762		-0.39	-0.314	0.132	5.23	0.271
-1.53	0.608	1.23	0.0707	2.3	-2.62	0.289		-0.301	-0.0676	0.125	5.01	0.704
-1.4	0.446	0.781	-0.206	1.08	-2.47	1.32		-0.364	-1.5	0.216	4.82	-0.246
-1.41	0.352	-0.408	-0.123	1.57	-2.56	0.769		-0.939	-0.543	-0.0542	5.78	0.933
-1.35	0.417	0.281	0.0756	3.14	-2.14	0.287		-1.72	1.04	-0.17	5.27	0.649
-1.22	0.608	-0.0108	-0.188	2.36	-1.04	0.0447		-1.55	-0.467	-0.177	5.52	0.167
-1.15	0.677	0.585	-0.526	1.65	-1.9	0.734		-2.06	0.705	0.16	4.32	0.0529
-1.12	0.332	-0.361	-0.565	1.03	-2.21	0.131		-1.41	-0.224	-0.546	4.69	-0.158
-1.33	0.675	-0.404	0.177	1.97	-2.26	0.467		-2	-1.29	0.442	4.04	0.187
-1.36	0.792	0.174	0.22	1.71	-2.85	0.416		-2.97	-0.643	-0.138	3.28	-0.672
-1.4	0.716	1.15	0.491	0.0274	-2	-0.0389		-1.87	0.704	-0.168	3.57	0.844
-1.38	1.04	1.08	0.287	1.99	-2.27	-0.269		-2.46	0.718	-0.45	3.63	-1.15
-1.31	1.14	0.471	0.748	0.22	-2.31	-0.106		-2.34	1.34	-0.444	3.9	0.398
-1.2	0.878	1.07	-0.221	0.535	-2.37	-0.421		-2.52	1.13	-0.432	3.14	0.33
-1.26	0.89	0.103	-0.129	1.43	-2.17	-0.147		-2.42	0.781	-0.31	3.24	-0.311
-1.34	0.989	0.878	-0.134	1.11	-1.41	-0.197		-0.437	-0.809	-0.309	3.38	-0.906
-1.38	1.18	2.62	-0.209	0.103	-2.45	-0.125		-1.83	-0.285	-0.365	2.97	-0.79
-1.29	1.19	1.86	-1.14	1.18	-2.39	0.072		-1.6	-0.451	-0.478	2.48	-0.109
-1.41	0.497	0.533	0.116	0.799	-2.91	0.509		-2.24	-1.55	-0.628	2.87	-1.39
-1.39	1.15	1.81	0.163	0.947	-2.83	0.362		-2.71	-0.318	-0.768	2.29	-0.105
-1.39	1.05	0.408	-0.877	0.693	-2.34	-0.315		-2.23	-0.826	-0.397	1.59	-0.452
-1.41	1.22	1.45	-1.34	1.87	-2.67	0.455		-2.25	0.436	-0.684	1.94	-0.384
-1.33	1.35	2.03	-0.239	1.97	-3.37	-0.00574		-1.83	-0.714	-0.372	1.94	0.586
-1.32	1.32	1.27	0.215	1.47	-2.89	0.446		-2.02	-0.0985	-0.35	1.93	0.0259
-1.44	1.1	1.47	0.0456	1.73	-1.21	-0.033		-1.18	0.655	-0.8	1.74	0.276
-1.42	1.39	1.2	0.521	1.89	-1.43	0.416		-2.75	1.33	-0.743	1.35	0.69
-1.5	1.19	0.984	0.39	0.734	-1.15	0.76		-2.32	-0.806	-0.449	2.21	1.49
-1.44	1.48	1.01	0.608	1.15	-1.02	1.39		-1.75	-1.56	-0.294	3.67	0.0817
-1.29	1.35	2.24	0.277	1.9	-0.829	1.63		-2.53	0.293	-0.57	4.46	0.581
-1.32	1.36	1.26	-0.143	1.36	-0.491	2.31		-1.85	0.957	-0.314	4.6	1.18
-1.32	1.48	0.0691	0.314	1.43	-0.176	1.93		-1.56	0.241	-0.597	4.73	-0.115
-1.33	1.44	0.836	0.243	1.95	-0.348	1.54		-1.78	-0.25	-0.689	4.11	-0.406
-1.4	1.34	1.73	-0.216	0.778	-1.01	1.1		-2.46	0.18	-0.816	4.17	-0.25
-1.23	1.38	1.03	-0.491	0.705	-1.14	1.04		-2.16	-0.921	-0.5	3.89	-0.583
-1.37	1.59	2.44	-0.0481	0.184	-1.08	1.02		-2.32	0.105	-1.18	3.81	-0.627
-1.39	1.63	0.714	-0.922	0.557	-2.2	1.87		-2.28	-0.801	-0.971	3.37	0.257
-1.29	1.54	-0.197	-0.0673	1.83	-2.25	1.02		-2.02	1.17	-0.845	3.38	-1.46
-1.34	1.59	1.43	0.264	1.55	-1.74	1.58		-2.12	0.0376	-0.869	2.41	-0.471
-1.4	1.36	0.959	0.0376	-0.0905	-1.48	0.161		-2.1	0.258	-1.02	3.18	-0.567
-1.43	1.53	0.319	0.00622	1.44	-2.26	0.247		-2.88	-0.914	-1.05	3.13	-0.184
-1.46	1.25	-0.428	-0.658	0.665	-1.2	0.34		-1.92	0.911	-1.18	2.26	-0.397
-1.6	1.16	1.26	-0.452	1.36	-1.5	0.601		-2.3	0.383	-1.17	2.35	0.0046
-1.51	0.655	1.59	-0.752	2.4	-2.1	1.01		-1.81	-0.653	-1.12	1.66	0.48
-1.56	0.86	1.64	-0.845	1.35	-1.34	0.495		-2.84	0.234	-1	1.47	-0.413
-1.53	0.845	0.688	-0.409	0.0454	-1.32	0.184		-2.38	-0.278	-0.994	1.56	0.0775
-1.55	1.05	0.642	-1.28	0.823	-2.01	0.347		-2.32	-0.508	-1.26	1.25	-1.21
-1.4	1.09	1.94	-0.711	0.137	-0.987	0.236		-1.9	-0.0453	-1.23	1.13	-2.1
-1.48	1.08	1.27	-1.4	0.928	-1.7	-0.231		-3.09	-0.218	-1.65	0.449	-0.578
-1.64	0.881	0.227	-0.43	0.463	-1.59	0.807		-2.66	-0.764	-1.13	0.786	-0.328
-1.55	0.828	0.398	-0.423	-0.438	-0.788	0.122		-1.94	0.289	-1.11	0.451	-0.845
-1.6	0.759	1.1	-1.24	0.357	-1.71	0.339		-2.53	0.435	-1.15	-0.211	-0.118
-1.52	0.945	1.16	-1.55	0.894	-2.09	0.79		-2.72	-0.126	-0.506	-0.336	-1
-1.43	0.859	1.78	-0.671	0.353	-1.68	0.345		-2.2	-0.277	-0.987	0.362	-0.959
-1.38	0.788	1.14	-0.609	1.57	-1.57	0.294		-2.72	-0.386	-1.3	0.306	0.32
-1.48	0.605	1.23	-0.654	0.632	-1.69	0.111		-2.06	-0.273	-1.06	-0.205	0.297
-1.53	1.04	0.789	-0.697	1.14	-2.83	-0.0456		-2.75	0.295	-1.17	-0.365	-0.876
-1.54	0.498	0.723	-0.995	0.601	-2.62	0.148		-2.03	-0.375	-1.08	-0.203	-1.27
-1.62	1.05	0.854	-0.303	0.753	-2.18	0.503		-2.76	0.231	-0.71	-0.415	-1.11
-1.51	0.505	2.32	-0.891	0.833	-2.3	0.867		-2.26	-0.538	-1.28	-0.0704	-1.33
-1.54	0.877	0.132	-0.792	-1.47	-2.29	0.813		-2.91	-1.45	-1.55	-0.416	-1.58
-1.51	1.68	0.538	-0.765	1.62	-2.5	0.844		-2.42	-0.464	-1.28	-0.289	-1.83
-1.58	1.37	1.44	-0.663	1.31	-2.63	0.48		-2.23	-0.384	-1.72	-0.568	-1.23
-1.61	1.12	1.05	-0.783	0.175	-2.14	-0.0125		-3.3	-0.458	-1.59	-0.246	-0.711
-1.5	1.02	0.376	-0.578	-0.207	-2.85	1.01		-3.21	1.01	-1.5	-0.0556	-0.43
-1.38	0.895	0.121	-1.26	2.04	-2.24	0.596		-2.43	-0.571	-1.38	-0.492	-0.853
-1.35	0.699	0.428	-0.406	1.79	-2.3	0.143		-1.61	0.465	-1.16	-0.879	-0.625
-1.32	1.09	1.23	-0.349	-0.285	-2.45	0.511		-4.35	-0.092	-1.15	-0.642	-1.64
-1.56	0.788	1.93	-0.325	0.0114	-2.29	0.724		-3.16	0.374	-1.34	-0.498	-1.68
-1.54	0.731	0.364	-1.02	0.979	-2.45	0.499		-2.53	0.443	-1.06	-0.635	-2.08
-1.51	0.769	1.66	-1.77	0.126	-2.51	0.475		-2.6	-0.37	-1.32	-0.213	-0.435
-1.52	0.683	0.618	-1.06	2.21	-2.23	0.819		-2.54	-0.643	-1.61	-0.754	-1.04
-1.61	0.573	0.395	-0.548	1.37	-2.56	-0.263		-2.47	-1	-1.29	-0.899	-1.59
-1.66	0.576	0.58	-0.872	0.37	-2.33	-0.105		-2.99	-0.93	-1.69	0.265	-1.24
-1.65	0.453	-0.396	-1.77	1.51	-2.41	0.332		-2.41	0.838	-1.16	-1.04	-1.22
-1.67	0.499	1.08	-2.02	1.02	-2.61	0.541		-2.76	-0.288	-1.33	-0.522	-2.48
-1.75	0.235	0.195	-1.42	0.57	-3.15	-0.19		-2.42	0.927	-1.44	-0.961	-0.509
-1.63	0.161	0.115	-1.07	0.753	-2.6	-0.536		-2.38	-0.743	-1.73	-0.578	-1.02
-1.58	0.51	-0.376	-1.69	-0.682	-2.81	-0.596		-2.18	1.16	-1.3	-0.894	-1.18
-1.58	0.126	0.903	-0.469	0.383	-2.84	-0.507		-2.3	-0.453	-1.78	-1.25	-0.861
-1.63	0.0646	-0.00587	-1.55	1.37	-2.8	-0.561		-2.3	-0.933	-1.22	-0.52	-1.06
-1.64	-0.0798	0.281	-1.6	-0.419	-3.45	-0.387		-3.07	-1.13	-1.31	-0.786	-1.11
-1.51	-0.0298	0.827	-1.8	0.773	-2.85	-0.0362		-1.91	0.87	-1.3	-1.12	-2.19
-1.6	-0.118	0.797	-1.81	0.785	-3.36	-0.0526		-2.48	0.0531	-1.92	-1.54	-0.959
-1.49	-0.127	0.78	-1.89	0.00953	-2.41	-0.97		-2.1	-0.00451	-1.42	-1.27	-0.821
-1.59	-0.0164	0.993	-1.59	-0.607	-2.86	-0.344		-2.23	-0.0551	-1.54	-0.915	-0.403
-1.46	-0.00948	-0.0762	-1.81	1.37	-3.09	-1.07		-2.97	-0.3	-1.47	-0.358	-0.852
-1.56	-0.0147	0.299	-2.16	1.51	-2.31	-1.24		-2.63	0.881	-1.5	0.411	-1.59
-1.55	0.11	0.441	-1.68	0.384	-2.76	-1.53		-2.4	-0.96	-1.97	0.694	-1.01
-1.57	-0.322	0.0165	-1.1	1.34	-3.15	-1.01		-2.19	0.374	-1.59	0.753	-1.64
-1.52	0.311	0.883	-1.61	-0.0581	-3.17	-0.659		-3.38	-0.584	-1.22	0.966	-1.83
-1.6	0.187	0.824	-1.48	1.04	-3.65	-1.58		-2.2	-0.0737	-1.32	0.786	-1.31
-1.57	0.455	-1.18	-1.67	0.497	-3.44	-1.43		-0.865	-0.419	-1.89	0.66	-0.213
-1.58	0.435	0.686	-1.86	1.25	-2.85	-1.63		-1.45	0.147	-2.27	0.321	0.202
-1.55	0.268	0.0866	-2.39	0.394	-3.35	-1.61		-0.928	0.318	-2.06	0.05	-0.485
-1.53	0.61	0.488	-2.27	0.305	-3.43	-2.62		-1.76	0.475	-2	0.581	-1.3
-1.48	0.456	-0.551	-2.42	-0.83	-3.78	-2.16		-1.8	-0.105	-2.08	0.102	-2
-1.54	0.689	0.325	-2.27	0.492	-3.63	-1.07		-1.61	0.369	-2.01	0.194	-1.54
-1.52	0.746	0.722	-2.27	1.29	-3.87	-1.06		-2.81	0.24	-2.36	-0.506	-2.42
-1.55	0.637	0.519	-2.11	1.92	-2.69	-0.791		-1.3	0.341	-2.04	-0.843	-1.77
-1.6	1.08	-1.11	-1.88	-0.445	-3.83	-1.22		-3.01	-1.34	-1.55	-0.81	-0.781
-1.7	1.27	0.0884	-3.05	0.0247	-3.78	-0.9		-2.46	-0.167	-1.59	-0.628	-1.1
-1.63	1.07	0.571	-1.94	1.05	-3.75	-1.09		-3.18	0.137	-1.48	-0.573	-1.35
-1.59	0.885	0.0823	-1.92	0.372	-3.11	-0.796		-2.26	-1.14	-1.63	-0.664	-0.778
-1.62	1.43	-0.529	-1.95	0.118	-3.2	-0.21		-2.91	-1.22	-1.6	-1.04	-0.425
-1.52	0.964	0.404	-2.37	-0.282	-3.12	-0.539		-3.03	0.307	-1.59	-1.15	-1.02
-1.51	1.26	0.109	-2	0.984	-3.23	-0.725		-2.5	0.271	-1.57	-1.49	0.221
-1.55	0.977	0.438	-2.59	-0.457	-3.03	-0.439		-2.72	-0.677	-1.91	-0.749	-1.28
-1.59	1.12	0.822	-2.33	-0.183	-3.36	0.0929		-1.61	0.247	-1.74	-0.594	-0.725
-1.53	0.97	-0.686	-2.18	-0.258	-3.14	0.655		-2.47	-0.477	-1.59	-0.699	-2.39
-1.47	0.334	0.625	-2.08	0.491	-3.47	1.74		-2.72	-0.287	-1.83	-0.965	-2.41
-1.43	0.206	1.1	-2.05	0.807	-3.36	2.4		-2.81	0.156	-1.84	-1.12	-0.954
-1.46	0.297	0.198	-2.08	0.0295	-3.37	3.46		-2.61	-0.127	-1.92	-1.09	-1.26
-1.37	-0.0806	-0.338	-2.49	1.34	-3.83	2.61		-2.23	-0.0998	-1.66	-1.13	-1.82
-1.4	-0.414	-0.141	-2.9	-0.208	-3.49	2.54		-2.12	-0.00663	-1.8	-1.3	-1.03
-1.39	-0.196	0.466	-2.88	-0.0255	-3.61	1.94		-3.08	0.141	-1.73	-2.12	-1.2
-1.45	-0.431	0.345	-2.27	0.712	-2.77	1.77		-3.05	1.01	-1.46	-1.24	-1.28
-1.38	-1.35	0.0487	-2.79	0.294	-3.78	2.07		-2.99	-0.0762	-1.28	-1.02	-1.48
-1.33	-0.844	0.927	-2.96	2.86	-3.05	1.08		-2.38	0.679	-1.55	-1.84	-0.598
-1.4	-0.731	-0.217	-2.18	-0.58	-3.18	1.1		-3.15	-0.935	-1.28	-1.74	-0.891
-1.09	-0.841	1.05	-3.19	0.103	-3.55	2.04		-2.54	-1.05	-2.03	-1.33	-0.964
-0.888	-0.9	0.292	-2.87	1.29	-4.01	1.22		-3.41	-1.51	-1.75	-1.63	-1.81
-0.784	-0.449	1.96	-2.65	2.12	-3.74	1.59		-2.32	-0.394	-1.92	-1.05	-1.98
-0.883	-0.424	1.1	-2.91	1.36	-3.63	0.89		-2.61	-0.574	-1.89	-1.38	-1.04
-0.832	-0.564	0.281	-2.43	0.0447	-4.32	0.22		-2.27	-0.739	-1.84	-1.19	-0.735
-0.877	-0.124	0.0663	-3.28	0.414	-3.79	0.593		-2.13	-0.485	-1.9	-0.774	-1.62
-0.878	-0.0281	0.482	-2.14	-0.187	-3.98	0.405		-2.44	0.405	-1.8	-1.44	-1.68
-0.858	-0.297	-0.178	-2.27	0.131	-4.48	0.657		-3.37	-0.802	-1.93	-1.38	-2.12
-0.823	-0.907	-0.396	-2.14	0.304	-4.37	0.0766		-3.3	-0.983	-1.91	-0.681	-1.61
-0.909	-1.13	1.73	-2.46	1.05	-4.3	0.27		-3.11	0.727	-1.79	0.249	-1.42
-0.945	-1.01	0.266	-3.05	0.399	-3.89	-0.338		-2.1	-0.276	-1.44	0.579	-1.23
-1.05	-1.75	1.52	-2.84	-0.117	-3.79	-0.103		-3.05	-0.0199	-1.25	0.00922	-1.21
-1.08	-1.84	-0.0886	-3.48	0.63	-3.19	0.128		-3.31	-0.968	-1.32	-0.0571	-1.17
-1.06	-1.21	-1.02	-2.72	0.697	-3.75	0.422		-3.11	-0.384	-1.63	0.00115	-1.13
-0.961	-1.62	-0.758	-2.83	1.72	-3.39	0.364		-2.56	-0.16	-1.54	-0.546	-1.72
-1.08	-1.82	0.148	-2.61	1.1	-3.4	0.964		-2.54	-0.172	-1.68	-0.0068	-1.96
-1.14	-1.74	0.417	-3.29	-0.0282	-3.75	0.377		-3.72	-0.764	-1.35	-0.864	-1.54
-1.24	-1.88	-0.0305	-3.1	-0.559	-4.02	0.321		-2.71	-0.255	-1.6	-0.539	-1.95
-1.18	-1.19	0.942	-2.76	0.702	-4.22	-0.307		-3.54	-0.728	-1.82	-1.08	-2.11
-1.2	-1.32	0.769	-2.87	0.715	-4.26	0.123		-3.4	-0.48	-1.76	-0.924	-2.47
-1.21	-1.71	0.64	-2.63	-0.371	-4.2	-0.391		-3.16	-0.299	-1.86	-1.28	-2.22
-1.15	-1.13	0.642	-2.15	0.654	-4.31	0.0394		-3.29	-0.277	-2.25	-1.4	-0.938
-1.28	-1.03	0.158	-2.81	0.844	-3.79	0.604		-3.15	0.0265	-2.17	-1.57	-2.1
-1.26	-1.22	-0.00162	-3.18	2.29	-4.08	-0.432		-3.43	-1.07	-1.75	-1.11	-2.1
-1.14	-1.19	0.0609	-3.25	-0.266	-3.56	-0.807		-2.92	-1.63	-1.49	-0.786	-1.66
-1.05	-1.56	0.16	-2.42	-0.375	-4.23	-0.646		-3.44	0.157	-2.12	-0.66	-1.03
-1.15	-1.17	-0.434	-3.07	0.617	-3.61	-0.555		-3.59	-0.194	-2.34	-0.917	-1.74
-1.17	-1.04	0.095	-2.55	0.552	-4.2	0.0803		-2.61	-0.669	-1.86	-1.28	-2.72
-1.11	-1.2	-0.219	-2.89	1.47	-3.85	-0.352		-3	-2.31	-2.15	-1.1	-1.61
-1.06	-0.972	1.15	-2.62	0.382	-4.09	-0.786		-2.59	-0.221	-2.09	-1.57	-1.37
-1.12	-0.996	-0.737	-3.1	1.07	-4.19	-0.814		-2.84	0.447	-2.05	-1.21	-1.93
-1.14	-1.42	1.06	-2.77	0.262	-4.67	-0.35		-2.38	-0.0493	-2.05	-1.66	-2.16
-1.16	-1.83	-0.174	-2.57	2.53	-4.07	-0.944		-3.08	-1.41	-1.97	-1.89	-2.93
-1.29	-1.69	0.954	-3.33	0.902	-4.1	-1.01		-3.31	-1.32	-1.91	-1.72	-1.59
-1.21	-1.71	0.156	-2.63	0.732	-4.24	-1.18		-3.02	-2.22	-2.02	-1.84	-1.25
-1.22	-1.3	0.338	-3.14	-0.0678	-4.03	-1.15		-3.65	-0.448	-1.95	-1.44	-1.26
-1.24	-1.93	-1.85	-2.89	0.964	-4.02	-0.545		-3.01	0.317	-1.83	-1.95	-2.24
-1.21	-1.62	0.919	-3.06	0.675	-3.96	-0.867		-3.63	-1.86	-1.6	-1.59	-2.4
-1.14	-1.86	-0.673	-3.36	0.0283	-4.03	-0.468		-3.35	-0.926	-2.04	-1.27	-1.99
-1.22	-1.44	0.152	-3.67	0.941	-3.7	-0.508		-2	-1.1	-1.64	-1.61	-3.2
-1.24	-0.962	-0.221	-3.3	-0.453	-4.52	-0.322		-2.24	-2.53	-2.13	-2.11	-2.33
-1.24	-1.17	-0.411	-3.69	1.46	-4.28	-0.199		-1.58	-0.959	-2.19	-2.18	-0.604
-1.32	-0.781	0.714	-2.92	0.847	-3.92	-0.431		-0.858	-0.629	-2.13	-1.72	-1.95
-1.31	-0.839	0.389	-3.18	1.2	-3.96	-0.551		-0.454	-0.542	-1.77	-1.85	-0.925
-1.18	-0.843	1.69	-2.61	1.16	-4.12	-0.277		-1.53	-1.01	-1.66	-1.22	-0.865
-1.23	-0.687	0.905	-3.42	1.74	-3.8	0.165		-2.39	-1.14	-1.88	-1.18	-0.023
-1.26	-0.948	1.65	-2.79	2.07	-4.43	-0.149		-1.73	-0.504	-2	-1.84	-1.77
-1.28	-0.862	0.403	-2.78	1.21	-4.01	-0.509		-1.48	-0.601	-2.24	-2.21	-0.733
-1.24	-0.979	0.0629	-3.3	0.0685	-3.98	-0.666		-1.01	-1.06	-1.85	-2.12	-0.274
-1.13	-0.43	0.315	-2.94	-0.44	-4.22	-0.514		-0.61	0.233	-2.14	-1.88	-0.541
-1.05	-0.0904	-1.22	-3.13	0.104	-4.14	-0.789		-0.652	-0.498	-1.96	-1.15	-0.908
-0.834	-0.553	-0.253	-2.79	0.961	-4.67	-1.14		-0.898	-0.94	-1.99	-1.73	-0.0993
-0.911	-0.447	0.078	-3.95	1.92	-4.81	-0.887		-1.3	-0.888	-1.87	-1.84	-1.55
-0.952	-0.279	0.22	-2.61	0.493	-4.48	-1.34		-1.67	1.09	-1.65	-1.72	-1.37
-1.01	-0.402	-0.542	-2.48	-0.104	-4.69	-1.13		-2.09	-0.229	-1.93	-2.04	-1.05
-1.02	-0.794	0.449	-3.26	1.47	-4.02	-1.18		-1.63	-0.818	-2.16	-2.52	-1.67
-1.01	-0.335	0.715	-3.58	1.26	-4.8	-0.787		-1.37	-1.02	-1.2	-2.44	-0.827
-1.05	-0.276	-0.355	-2.95	1.02	-4.69	-1.29		-1.8	-0.0864	-1.55	-2.34	-1.06
-1.04	-0.4	-1.22	-3.8	0.179	-4.97	-1.3		-1.9	-1.03	-1.62	-2.72	1.11
-1.09	-0.268	0.776	-3.08	-0.686	-4.2	-1.17		-1.84	-0.402	-1.97	-2.01	-0.824
-1.12	-0.33	0.124	-3.09	0.3	-4.34	-0.987		-2.3	-0.414	-1.88	-2.06	-0.209
-1.09	-0.375	-0.352	-3.12	0.814	-4.19	-1.19		-1.82	-0.707	-2.02	-2.35	-0.471
-1.08	-0.157	-0.754	-3.29	0.339	-4.16	-1.34		-1.82	-0.868	-2.12	-2.41	0.0567
-1.09	-0.236	-0.54	-3.99	1.7	-4.06	-1.42		-1.23	-0.359	-1.87	-2.25	-1.23
-1.13	-0.252	1.23	-3.91	1.11	-4.93	-2.23		-1.58	-1.2	-2.2	-2.24	-2.58
-1.2	-0.33	-0.754	-3.57	0.861	-4.48	-1.56		-1.55	-0.593	-2.01	-2.09	-0.396
-1.14	-0.345	-0.204	-2.42	0.38	-4.12	-0.601		-1.38	0.0144	-2.09	-2.41	-0.816
-1.23	-0.175	-0.36	-3.66	0.805	-4.56	-0.913		-1.01	-0.936	-2.04	-2.08	-0.645
-1.1	-0.303	-0.332	-3.3	0.339	-4.67	-0.767		-1.33	-0.0417	-2.21	-2.48	-1.52
-0.998	-0.487	0.513	-3.35	1.26	-4.64	-0.817		-1.46	-1.35	-1.95	-1.63	-2.21
-0.999	-0.585	-0.308	-3.18	1.28	-4.69	-0.826		-0.93	-0.33	-2.07	-2.38	-1.22
-0.997	-0.349	0.393	-2.9	0.768	-4.14	-0.167		-1.05	-1.96	-1.8	-2.08	-1.04
-0.936	-0.603	-0.776	-3.01	0.917	-4.7	-1.27		-0.752	-0.287	-2.27	-1.92	-0.662
-0.887	-0.29	-0.598	-4.05	1.09	-4.55	-0.736		-1.02	0.36	-2.14	-2.05	-0.812
-1.01	-0.4	-0.403	-3.48	0.665	-4.81	-0.99		-0.258	-0.837	-2.4	-1.75	-0.92
-0.957	-0.532	-0.694	-3.56	0.845	-4.54	-1.07		-1.09	-0.863	-2.08	-2.26	-2.22
-0.913	-0.433	-0.501	-3.49	0.27	-4.11	-1.38		-0.838	-0.477	-2.05	-2.41	-1.44
-1.03	-0.604	0.66	-3.25	0.309	-4.08	-0.937		-0.263	-0.575	-2.37	-1.06	-2.09
-1.07	-0.641	-0.668	-3.39	0.43	-4.4	-0.796		-0.928	-0.0968	-2.23	-0.363	-0.3
-1.09	-0.743	0.0275	-3.89	0.619	-4.13	-0.852		-1.61	-1.78	-2.13	-0.261	-0.992
-1.02	-0.607	-1.53	-2.73	0.748	-4.92	-0.593		-0.807	0.528	-1.92	-0.579	-1.38
-1	-0.809	0.341	-2.66	0.24	-4.37	-0.854		-0.626	-1.04	-1.79	-0.665	-1.6
-1.04	-0.719	-0.812	-4.51	0.303	-4.18	-1.17		0.0617	1.02	-1.59	-0.427	-1.8
-1.07	-0.925	-0.798	-3.33	0.459	-4.59	-1.43		-1.23	-0.0952	-1.98	-1.31	-2.25
-1.02	-0.814	-0.592	-3.96	-0.698	-4.22	-1.6		-1.05	-1.11	-1.89	-0.688	-2.09
-1.03	-1.05	-0.314	-2.62	-0.732	-4.86	-2.21		-0.513	-0.145	-2.14	-0.952	-0.028
-1.03	-0.85	0.0497	-3.21	0.832	-4.01	-1.33		-1.88	-0.421	-1.26	-0.9	-1.51
-1.08	-1.05	0.594	-3.28	0.111	-4.98	-0.818		-1.19	0.188	-1.77	-1.01	-2.17
-1.09	-0.782	0.416	-3.76	-0.909	-4.4	-1.29		-1.62	0.286	-1.68	-0.721	-0.792
-1.1	-0.842	-0.464	-3.65	-0.256	-4.38	-1.34		-0.911	-0.272	-1.25	-0.87	-0.408
-1.13	-0.801	0.278	-4.01	0.299	-4.29	-1.31		-1.29	-0.753	-1.44	-1.02	-1.55
-1.08	-0.86	-0.895	-4.03	-0.228	-4.56	-0.85		-1.23	-1.52	-1.48	-1.46	-1.21
-1.13	-0.792	0.404	-3.34	0.36	-4.35	-0.94		-1.99	-0.268	-1.69	-0.843	-2.22
-1.06	-0.822	-0.422	-3.31	0.183	-3.57	-1.55		-2.52	-0.55	-1.47	-1.34	-0.391
-0.993	-0.905	0.0356	-3.02	0.208	-3.03	-1.26		-1.85	-0.0157	-1.36	-2.1	-1.52
-1.01	-0.695	-0.791	-3.09	0.328	-4.11	-1.52		-1.9	0.287	-1.77	-1.87	-0.494
-0.933	-0.717	-0.428	-3.45	0.614	-3.4	-1.15		-2.14	-0.733	-1.25	-1.61	-1.68
-0.905	-0.581	0.665	-3.53	0.629	-4.1	-1.34		-1.77	-0.843	-1.31	-1.76	-3.07
-0.687	-0.634	0.473	-3.7	-0.193	-3.79	-2.15		-2.61	-0.208	-0.983	-1.8	-1.51
-0.717	-0.585	-0.855	-4.51	0.851	-4.47	-1.52		-2.69	-1.75	-1.11	-1.66	-1.51
-0.555	-0.427	-0.184	-3.41	0.823	-4.74	-1.9		-2.25	0.523	-1.15	-2.01	-1.7
-0.692	-0.165	0.235	-3.81	0.768	-4.38	-1.6		-1.99	0.703	-1.2	-2.33	-2.07
-0.568	-0.254	0.423	-3.59	-0.51	-4.16	-1.87		-2.3	1.31	-1.1	-2.24	-1.33
-0.729	-0.606	-0.283	-3.4	-0.221	-3.85	-1.7		-1.8	0.822	-1.45	-2.06	-2.86
-0.673	-0.497	0.143	-3.5	0.595	-4.35	-1.31		-2.08	0.528	-1.33	-1.99	-1.05
-0.636	-0.608	-0.232	-4.39	1.46	-4.05	-2.27		-2.78	-0.278	-1.43	-1.78	-0.755
-0.56	-0.333	1.25	-3.76	0.754	-4.31	-1.31		-2.24	-0.348	-1.48	-1.61	-1.83
-0.617	-0.399	-1.05	-3.46	1.67	-4.1	-1.72		-2.06	-0.231	-1.26	-2.29	-1.14
-0.699	-0.267	-0.337	-3.58	-0.0964	-3.92	-0.706		-2.03	-0.335	-1.55	-2.19	-0.623
-0.585	-0.497	0.146	-3.12	0.186	-4.44	-1.05		-1.94	-0.955	-1.6	-2.42	-0.285
-0.693	-0.345	-0.679	-3.9	0.731	-4.62	-1.32		-1.38	0.37	-1.7	-1.63	-1.03
-0.701	-0.582	0.214	-3.44	0.191	-4.79	-1.69		-2.04	0.528	-2.23	-1.8	0.202
-0.703	-0.445	0.238	-3.6	1.6	-4.08	-1.6		-2.29	0.201	-1.8	-2.24	-0.877
-0.656	-0.721	-0.181	-3.67	1.96	-4.22	-1.72		-1.7	-0.143	-1.56	-2.4	-0.579
-0.728	-0.602	-0.217	-3.38	0.019	-4.73	-1.71		-2.41	0.628	-1.69	-1.95	-1.05
-0.704	-0.731	-1.22	-3.45	0.19	-4.62	-1.49		-2.9	0.631	-1.63	-1.99	-1.04
-0.663	-0.806	-0.568	-3.31	0.354	-3.97	-1.81		-2.61	0.48	-2.23	-1.92	-0.871
-0.675	-0.827	-0.271	-3.57	1.4	-4.11	-1.63		-2.64	0.221	-2.36	-1.96	-0.653
-0.709	-0.64	0.163	-3.62	0.405	-4.37	-1.57		-2.91	1.59	-2.6	-1.7	-0.945
-0.807	-1.03	-0.541	-3.81	0.831	-4.96	-1.94		-2.54	-0.201	-1.99	-1.98	0.478
-0.727	-0.62	0.00399	-3.12	0.193	-4.37	-1.28		-3.65	0.221	-1.98	-2.2	1.61
-0.835	-0.806	0.245	-3.52	0.924	-5.11	-1.52		-3.32	-0.826	-2.01	-2	-0.0394
-0.792	-0.428	0.166	-3.72	0.154	-4.26	-1.39		-1.87	-0.197	-1.89	-1.95	0.582
-0.866	-0.405	-0.174	-3.04	1.03	-4.3	-1.37		-0.606	0.18	-1.51	-1.41	1.04
-0.939	-0.537	0.48	-3.5	0.468	-4.49	-1.83		-1.25	0.67	-1.98	-1.95	-0.283
-0.842	-0.273	0.33	-3.58	0.745	-4.82	-1.34		-1.02	-0.772	-1.49	-1.99	0.985
-0.778	-0.387	-0.0814	-3.83	1.03	-4.91	-1.86		-1.1	0.661	-1.79	-1.93	-0.575
-0.831	-0.313	-0.863	-3.51	0.531	-4.55	-1.66		-1.15	0.472	-1.44	-2.16	-0.452
-0.9	-0.203	0.159	-3.64	0.707	-4.71	-2.27		-1.45	-0.831	-1.76	-1.58	1.45
-0.802	-0.526	-0.235	-3.55	0.233	-4.15	-1.62		-1.51	-0.366	-1.83	-2.33	0.145
-0.815	-0.203	-0.438	-3.64	0.299	-4.45	-1.74		-0.521	-0.313	-1.34	-1.62	-1.07
-0.72	-0.174	1.55	-3.83	-0.165	-4.96	-1.73		-1.08	-1.38	-1.7	-1.79	-1.17
-0.77	0.0843	-0.685	-4.16	-0.0791	-4.62	-1.69		-1.34	0.459	-1.55	-2.27	0.529
-0.724	-0.332	-0.642	-3.87	1.77	-4.47	-0.844		-2.11	-0.0204	-1.89	-1.99	-1.65
-0.631	-0.196	0.708	-4.3	0.696	-5.17	-0.792		-1.36	0.135	-2.31	-2.06	-1.17
-0.628	-0.356	0.662	-3.9	1.13	-5.08	-0.815		-1.69	-0.19	-2.12	-2.46	-0.0224
-0.676	-0.561	-0.42	-3.43	0.265	-5.09	-1.15		-1.82	0.286	-2.12	-2.44	0.16
-0.686	-0.354	-0.456	-3.86	1.05	-4.89	-1.17		-2.19	1.03	-1.78	-2.11	-0.993
-0.629	-0.233	-0.898	-3.66	0.982	-4.76	-0.857		-1.73	1.19	-1.9	-2.1	-1.41
-0.795	-0.166	-0.173	-3.4	1.66	-4.81	-1.31		-2.75	-0.0843	-1.84	-2.07	-1.06
-0.677	-0.187	-1.11	-3.67	1.37	-4.43	-1.33		-2.74	0.279	-1.67	-2.5	-1.29
-0.689	-0.208	-0.33	-2.92	0.608	-4.25	-0.879		-3.29	1.64	-1.24	-2.57	1.24
-0.621	-0.0419	-0.481	-3.84	0.659	-3.98	-0.759		-3.35	5.59e-06	-1.31	-2.38	-0.308
-0.611	0.108	-1.34	-3.37	1.17	-4.72	-1.02		-2.71	0.0774	-1.06	-2.61	0.0129
-0.694	0.219	-0.493	-3.73	1.78	-4.3	-0.981		-2.24	1.4	-1.17	-3.06	-0.999
-0.813	0.129	-0.56	-3.79	0.226	-4.43	-1.77		-2.97	-0.622	-1.73	-2.56	-1.05
-0.729	0.0727	0.0284	-3.81	0.771	-4.81	-1.89		-3.37	-0.477	-1.55	-2.72	-1.43
-0.743	0.319	-0.378	-2.95	0.256	-4.46	-1.11		-3.46	0.117	-1.57	-2.44	-1.83
-0.69	-0.12	-1.32	-3.9	-1.58	-4.31	-1.27		-3.4	-0.0745	-1.81	-2.89	-1.56
-0.658	-0.172	-0.565	-3.1	-0.626	-4.43	-1.92		-2.96	0.0322	-1.26	-2.41	-1.42
-0.679	-0.0154	-0.858	-4.12	-0.491	-4.52	-1.86		-3.16	1.31	-1.28	-2	-0.387
-0.644	0.0877	-1.53	-3.55	0.832	-3.9	-1.65		-3.11	-0.884	-1.16	-2.05	-1.46
-0.468	0.141	0.222	-4.15	-0.103	-4.39	-1.71		-2.89	0.483	-1.22	-2.2	-1.65
-0.583	0.511	-0.26	-3.67	-0.00451	-4.05	-1.85		-3.03	0.0278	-1.81	-2.46	-2
-0.613	0.474	-0.731	-3.83	-0.0965	-3.75	-1.6		-3.24	0.748	-1.84	-1.67	-2.11
-0.669	0.747	-0.702	-3.97	0.172	-4.75	-1.55		-4.33	0.489	-1.95	-2.12	-1.26
-0.699	0.487	-0.168	-3.41	-0.0245	-3.95	-1.86		-2.98	0.469	-1.65	-2.17	-1.25
-0.707	0.373	-0.282	-3.49	0.0502	-4.16	-1.73		-2.37	0.855	-1.5	-2.04	-1.7
-0.811	1.01	-1.81	-4.13	-0.446	-4.38	-1.82		-2.64	0.973	-2	-1.72	-0.971
-0.537	0.841	-0.243	-4.37	1.29	-3.65	-1.3		-3.15	0.239	-1.9	-2.29	-2.89
-0.564	0.905	-0.806	-4.18	-0.698	-3.83	-1.25		-3.08	-1.28	-1.58	-2.3	-2.77
-0.476	0.721	-0.482	-3.92	-0.616	-4.75	-1.13		-2.46	1.09	-1.84	-2.8	-0.834
-0.488	0.648	-0.417	-3.79	0.666	-3.82	-1.3		-3.28	0.805	-1.53	-2.67	-1.98
-0.446	1.16	-0.666	-3.87	1.11	-4.06	-1.44		-3.13	-1.27	-1.79	-2.33	-0.0718
-0.309	0.944	-0.242	-3.32	1.77	-4.17	-1.25		-4.04	-0.128	-1.64	-2.92	-1.59
-0.359	0.79	-1.09	-3.7	0.506	-4.05	-1.91		-3.67	0.233	-1.7	-2.35	-1.23
-0.34	0.963	-0.441	-3.2	1.02	-4.18	-1.5		-3.7	1.16	-1.61	-2.35	0.199
-0.325	1.42	-0.196	-2.97	0.343	-3.91	-2.05		-3.56	1.13	-1.87	-2.23	-0.634
-0.396	1.41	0.375	-3.34	0.233	-4.43	-1.71		-3.75	1.05	-1.47	-2.52	-1.98
-0.297	1.05	-1.22	-3.73	0.944	-3.62	-1.81		-2.76	-0.986	-1.8	-2.42	-0.196
-0.133	0.907	-1.35	-3.85	0.144	-4.67	-1.58		-1.64	-0.0343	-1.33	-2.35	-0.353
-0.239	0.951	-0.374	-3.12	0.108	-4.02	-1.29		-0.789	-0.411	-1.27	-2.22	-1.27
-0.312	1.21	-0.709	-4.24	0.718	-4.08	-1.35		-1.81	0.858	-1.41	-2.65	-0.13
-0.37	1.01	-0.273	-2.79	0.801	-5.09	-1.15		-1.31	0.111	-1.64	-2.71	-0.982
-0.4	1.09	-0.094	-3.93	0.644	-4.96	-1.02		-2.24	0.61	-1.89	-3.03	-2.27
-0.541	0.924	-0.425	-3.7	1.42	-4.16	-1.8		-3.4	1.7	-1.34	-2.31	-0.479
-0.503	1.3	-0.454	-4.25	-0.128	-4.6	-2		-3.43	-0.244	-1.32	-2.68	0.488
-0.576	0.924	0.594	-3.7	-0.0931	-4.05	-1.73		-4.5	-0.429	-1.36	-1.99	-0.632
-0.436	0.696	-0.769	-3.71	1.24	-4	-0.922		-2.74	0.526	-1.47	-2.83	-1.22
-0.55	0.604	-0.291	-3.85	1.87	-4.41	-0.992		-1.52	-1.97	-1.41	-2.48	-1.58
-0.586	0.594	-0.435	-3.31	0.944	-3.92	-1.08		-2.41	-0.932	-2.08	-2.66	-1.7
-0.724	0.757	-0.483	-3.8	0.73	-4.07	-0.774		-2.29	-0.952	-1.67	-2.15	-0.385
-0.782	0.216	-0.576	-3.17	0.247	-3.96	-1.15		-2.35	-0.512	-1.6	-2.6	-2.09
-0.839	0.622	-0.347	-4.02	0.048	-3.95	-1.11		-3.07	-0.224	-1.6	-2.9	-1.06
-0.77	0.715	-1.77	-4.44	-0.732	-3.94	-1.17		-2.29	-0.131	-1.95	-2.21	0.454
-0.784	0.583	0.0472	-3.46	-0.215	-4.4	-1.88		-2.23	-0.428	-1.43	-2.68	-0.597
-0.598	0.523	0.274	-3.36	0.437	-3.78	-1.56		-1.93	0.555	-1.8	-2.33	-0.885
-0.739	0.383	0.495	-3.62	0.878	-3.93	-1.26		-2.08	0.142	-1.65	-2.7	-0.136
-0.719	0.375	-0.0433	-3.88	1.32	-4.25	-1.84		-2.13	-0.243	-1.9	-2.47	-1.94
-0.824	0.248	-1.51	-3.64	0.915	-4.74	-1.79		-3.05	-0.128	-1.44	-2.67	-0.419
-0.714	0.292	-0.79	-3.62	0.0401	-4.88	-1.55		-2.69	0.246	-1.4	-2.56	-0.464
-0.776	0.21	0.0865	-3.48	-1.14	-4.63	-2.23		-3.3	-0.239	-1.59	-2.67	-2.38
-0.818	0.505	-0.612	-3.19	0.928	-3.86	-1.6		-2.58	-0.554	-1.24	-2.01	-1.98
-0.767	0.0421	-0.565	-3.8	0.898	-4.33	-1.86		-3.25	-0.628	-1.59	-2.49	-2.05
-0.726	0.497	0.255	-3.64	-0.312	-4.97	-2.13		-4.04	-0.637	-1.74	-2.35	-1.34
-0.834	0.313	0.296	-3.5	1.21	-4.58	-1.71		-3.11	-0.858	-1.53	-2.93	-2.27
-0.908	0.322	-0.0228	-3.84	1.39	-4.46	-1.86		-2.28	1.14	-1.4	-3.03	-1.46
-0.807	0.341	0.163	-3.49	1.35	-4.58	-2.08		-3.35	-0.315	-1.51	-3	-2.26
-0.832	0.402	-1.53	-3.7	0.445	-4.82	-1.77		-3.44	0.83	-1.42	-2.1	-0.349
-0.754	0.442	-0.895	-4.41	0.00784	-4.36	-1.81		-2.72	-0.602	-1.28	-2.04	-1.95
-0.832	0.166	-0.86	-3.92	0.405	-4.61	-1.48		-4.01	-0.467	-1.59	-2.42	-1.84
-0.825	0.208	-0.0803	-4.34	-0.365	-4.42	-1.54		-2.57	-0.176	-1.84	-2.4	-2.47
-0.778	-0.125	-0.766	-3.82	0.169	-4.35	-1.46		-2.58	-1.27	-1.68	-2.99	-1.39
-0.785	-0.0745	-1.27	-3.93	0.509	-4.93	-1.81		-2.86	-0.218	-2.51	-2.94	-1.1
-0.747	-0.00621	-0.0276	-4.19	0.726	-4.65	-1.65		-4.08	0.11	-2.44	-3.02	-2.27
-0.779	0.00699	0.593	-3.7	0.0681	-4.56	-2		-3.49	-1.06	-2.07	-3.17	-1.33
-0.75	0.118	-0.398	-3.44	-0.262	-4.12	-2.34		-2.99	0.261	-1.64	-2.95	-0.45
-0.726	0.206	-1.13	-3.88	-0.333	-4.36	-1.35		-3.64	-0.594	-1.56	-2.66	-2.64
-0.776	0.172	-0.499	-3.72	0.393	-4.42	-2.19		-3.21	-0.262	-1.45	-1.49	-1.02
-0.882	0.0576	-0.328	-3.43	1.07	-4.56	-2.21		-3.17	-0.338	-1.73	-1.77	0.254
-0.795	-0.064	-0.414	-4.06	0.342	-4.69	-1.96		-3.22	-0.526	-1.59	-1.51	-1.85
-0.91	0.176	-1.18	-2.93	1.45	-5.1	-1.64		-4.56	-0.514	-1.93	-1.78	-0.228
-0.823	0.294	-0.403	-3.74	-0.044	-4.16	-2.66		-2.66	-1.25	-1.88	-2.43	-0.965
-0.816	0.0615	-0.3	-3.73	-0.52	-4.19	-2.53		-2.8	-1.24	-2.08	-2.46	-2.07
-0.627	0.372	-0.343	-3.55	-0.796	-4.44	-1.58		-3.57	0.451	-1.56	-2.64	-1.44
-0.561	0.065	0.719	-3.05	-0.251	-4.11	-1.88		-2.77	-1.06	-1.6	-2.32	-0.947
-0.49	0.295	-0.656	-3.79	0.213	-4.14	-2.35		-1.63	-0.306	-1.27	-2.11	-1.83
-0.565	0.0988	0.0883	-3.41	-0.362	-4.48	-2.19		-3.63	-1.59	-1.35	-2.44	-1.41
-0.611	0.135	0.0228	-2.78	0.337	-4.16	-2.34		-2.72	-0.304	-1.57	-2.61	-0.611
-0.527	0.0951	-0.61	-2.79	-0.319	-3.94	-2.2		-3.26	0.702	-1.63	-2.39	-1.51
-0.495	0.147	0.321	-3.31	0.662	-3.82	-1.97		-2.82	0.883	-1.72	-2.63	-1.63
-0.543	-0.0836	-0.0206	-3.09	0.109	-3.54	-1.48		-2.76	0.0162	-1.59	-2.34	-1.51
-0.61	-0.146	-0.189	-3.5	0.464	-3.83	-1.79		-2.83	-0.968	-2.07	-2.46	-0.784
-0.713	-0.118	-0.664	-3.56	0.0347	-3.57	-2.38		-1.69	-1.4	-2.11	-2.53	-1.52
-0.726	-0.499	-0.402	-3.42	0.194	-4.07	-1.74		-2.3	-0.575	-2.34	-2.6	-0.684
-0.682	-0.458	-0.624	-4	0.079	-3.7	-2.34		-0.928	0.0761	-2.06	-2.83	-1.06
-0.692	-0.263	0.124	-3.86	0.714	-3.36	-2.19		-1.36	-0.57	-1.65	-2.35	-1.74
-0.761	-0.448	-0.231	-3.35	0.495	-3.75	-2.32		-2.78	-0.53	-2.06	-2.07	-1.04
-0.882	-0.306	-0.385	-4.02	0.382	-4.01	-2.11		-2.61	-0.902	-1.62	-2.17	-1.39
-0.71	-0.304	-0.166	-3.42	0.852	-3.65	-1.71		-2.35	-1.2	-1.98	-2.39	-1.74
-0.885	-0.438	0.168	-3.59	1.12	-4	-1.99		-2.23	-1.04	-1.96	-2.26	-0.176
-0.88	-0.647	0.809	-3.6	-0.585	-3.62	-2.51		-1.6	-0.109	-2.28	-2.41	-0.171
-0.872	-0.721	0.903	-3	0.903	-4.33	-1.94		-3.05	-0.473	-3.01	-2.79	-1.84
-0.922	-1.11	1.05	-3.02	-0.35	-4.46	-1.62		-1.89	-0.361	-2.41	-2.29	-1.79
-0.867	-0.585	0.924	-3.34	-0.622	-3.87	-1.84		-2.38	-0.464	-2.17	-2.53	-1.92
-0.883	-0.822	0.861	-3.52	0.489	-4.38	-2.06		-2.38	-1.44	-2.16	-2.6	-1.74
-0.803	-0.73	0.868	-3.81	0.29	-4.4	-1.8		-2.32	-1.02	-2.49	-2.61	-1.49
-0.9	-0.976	0.0583	-4.16	0.377	-3.49	-2.03		-1.32	-1.33	-2.69	-2.27	-1.75
-0.853	-0.955	1.5	-3.92	0.238	-3.91	-2.04		-1.64	0.967	-2.26	-2.64	-1.99
-0.962	-0.349	1.44	-3.7	-0.0353	-3.87	-1.97		-1.84	-0.0975	-2.36	-2.41	-1.79
-1.01	-0.255	1.4	-3.09	-0.333	-4.66	-1.72		-1.9	0.028	-2.13	-2.75	-0.625
-0.974	-0.627	0.726	-3.61	0.7	-4.42	-2.05		-2.81	-0.561	-2.05	-2.79	-0.553
-0.877	-0.569	1.2	-3.7	0.291	-3.38	-1.71		-2.43	-1.73	-1.95	-2.23	-0.0753
-0.883	-0.514	1.62	-3.62	0.824	-4.64	-1.85		-3.55	-0.316	-1.85	-1.92	-0.644
-0.843	-0.488	1.91	-3.48	-0.909	-3.7	-1.86		-3.49	0.304	-2.07	-2.12	-1.72
-0.752	-0.454	1.48	-3.29	0.148	-4.02	-2.74		-3.03	-0.324	-1.47	-1.93	-0.858
-0.78	-0.552	1.76	-3.99	0.682	-3.43	-2.63		-2.02	-0.218	-1.44	-2.46	-0.574
-0.831	-0.717	2.32	-3.97	0.369	-3.65	-2.45		-2.2	-0.0293	-1.49	-1.92	0.225
-0.932	-0.729	0.272	-3.5	0.788	-4.49	-2.76		-1.59	-1.8	-1.61	-2.08	-1.26
-0.971	-0.62	0.565	-4.23	0.418	-4.36	-1.4		-2.13	-0.765	-1.3	-1.9	-0.489
-1.03	-0.534	1.63	-3.32	0.573	-3.73	-1.74		-2.31	0.423	-1.54	-2.19	0.199
-1.04	-0.624	1.22	-4.3	0.616	-4.2	-1.83		-1.84	-0.147	-2.27	-2.59	-0.638
-1.09	-0.822	2.66	-3.52	0.67	-3.7	-1.53		-2.05	-0.573	-1.9	-1.73	-2.58
-1.13	-0.806	2.08	-3.2	0.7	-3.94	-1.39		-1.03	0.1	-1.97	-1.7	-1.12
-1.14	-0.35	2.37	-3.11	0.798	-2.97	-1.76		-1.16	0.617	-1.75	-1.73	-0.638
-1.16	-0.525	1.31	-3.5	-0.327	-2.74	-1.82		-1.95	-0.337	-1.93	-2.28	-0.906
-1.14	-0.842	1.06	-3.07	0.608	-3.74	-1.86		-2.7	-0.237	-1.97	-1.98	-0.951
-1.2	-1.01	0.714	-3.39	1.25	-3.19	-1.47		-2.6	-0.787	-1.21	-2.2	-1.12
-1.17	-0.696	0.306	-3.41	0.454	-3.56	-2.2		-3.89	-0.246	-1.34	-2.32	-1.01
-1.28	-1.02	1.65	-3.78	0.245	-2.81	-1.95		-3.76	0.348	-1.28	-2.01	-0.0447
-1.18	-0.918	0.668	-3.75	0.3	-2.28	-2.27		-3.19	-0.566	-0.464	-2.72	-0.301
-1.11	-0.902	1.12	-3.77	-0.656	-2.81	-2.2		-2.01	0.0147	-0.582	-2.41	-0.865
-1.2	-1.13	0.354	-3.54	1.24	-2.57	-1.51		-1.65	-0.0716	0.0945	-2.47	-0.162
-1.23	-0.813	1.03	-3.56	0.0879	-2.49	-1.82		-2.49	-0.412	-0.663	-2.9	-1.2
-1.23	-0.989	0.664	-3.29	1.12	-2.49	-1.83		-2.48	0.0378	-0.119	-2.68	-1.41
-1.22	-0.905	0.414	-3.32	-0.055	-2.94	-1.65		-2.58	-0.225	-0.0544	-2.38	-0.935
-1.21	-0.945	0.352	-3.81	1.32	-2.08	-2.06		-2.84	0.952	-0.038	-2.79	-1.82
-1.21	-0.906	1.65	-3.3	0.539	-2.14	-1.2		-3.43	0.509	-0.256	-2.27	-1.13
-1.17	-0.486	-0.0773	-3.28	-0.507	-2.72	-1.2		-2	-0.344	-0.506	-2.7	-0.679
-1.08	-0.412	0.653	-4.02	-0.316	-2.34	-1.07		-0.584	0.59	-0.485	-2.52	-1.3
-1.2	-0.599	1.15	-4.31	0.653	-2.98	-1.35		-1.73	-0.177	-0.405	-2.85	0.218
-1.19	-0.551	0.995	-4.19	1.76	-2.87	-1.18		-1.57	-0.422	-0.491	-2.42	-0.557
-1.23	-0.739	-0.464	-3.72	1.15	-2.63	-0.864		-2.89	-0.634	-0.634	-2.67	-1.23
-1.13	-0.814	-0.354	-3.85	0.863	-1.45	-1.43		-2.79	-0.134	-0.979	-2.44	-0.781
-0.989	-0.683	0.698	-3.53	-0.605	-0.983	-1.03		-3.03	2.41	-1.09	-1.87	-0.819
-0.844	-0.736	0.76	-3.79	0.171	-1.74	-1.09		-3.15	0.0242	-0.911	-2.36	-0.71
-0.929	-0.76	-0.703	-3.83	1.19	-1.36	-0.92		-2.9	0.557	-1.02	-2.71	-1.35
-0.697	-1.03	0.435	-3.46	1.24	-1.42	-1.19		-1.33	0.495	-1.14	-2.55	-1.19
-0.715	-0.983	1.1	-3.08	-0.686	-1.51	-1.27		-2.6	0.904	-1.28	-2.91	0.138
-0.747	-0.69	0.592	-3.33	-0.0801	-2.4	-0.841		-4.16	0.783	-1.22	-3.06	-0.518
-0.672	-0.579	-0.458	-3.45	0.05	-1.7	-0.973		-3.8	0.883	-1.1	-2.82	-1.26
-0.815	-0.476	-1.17	-3.7	-0.609	-3.2	-1.06		-3.38	0.357	-0.773	-2.64	-0.975
-0.757	-0.757	-0.469	-3.77	0.436	-2.65	-0.974		-2.45	-0.145	-1.11	-1.97	0.851
-0.745	-0.247	-1.57	-3.36	-0.287	-2.45	-1.59		-1.22	-0.0176	-1.05	-2.31	-0.184
-0.691	-0.472	-1.83	-3.72	0.032	-1.91	-1.5		-1.43	0.137	-1.02	-2.56	-0.0356
-0.717	-0.18	-0.751	-4.12	1.36	-1.75	-1.08		-1.25	1.13	-0.913	-2.69	-0.226
-0.815	0.545	-0.932	-4.19	0.831	-2.47	-1.66		-2.4	0.848	-0.921	-2.7	-0.794
-0.846	0.00403	-0.036	-3.51	0.939	-2.46	-1.04		-3.4	0.537	-0.216	-2.34	-1.23
-0.849	0.173	-0.481	-3.64	2.37	-1.97	-1.1		-2.2	-0.143	-1.34	-2.74	-0.793
-0.867	0.049	-0.819	-4.27	-0.0527	-2.57	-1.33		-2.01	0.897	-1.14	-3.08	0.784
-0.798	0.135	-0.885	-3.29	0.0909	-2.33	-1.03		-2.01	1.27	-1.16	-2.73	-0.588
-0.842	0.0455	-1.4	-3.52	0.853	-3.12	-0.752		-2.11	-0.0869	-0.898	-2.16	-0.495
-0.71	0.0815	-1.1	-3.93	0.0708	-2.93	-1.03		-2.51	-0.257	-1.16	-2.96	-0.617
-0.411	0.00238	-1.17	-4.16	0.914	-2.84	-1.06		-3.04	-0.198	-1.22	-2.47	-1.04
-0.505	-0.0233	-0.821	-3.9	1.07	-2.55	-0.5		-3.55	0.00644	-0.996	-2.99	-1.46
-0.517	0.0875	-0.0814	-3.55	0.15	-2.41	-0.537		-3.01	0.191	-0.846	-2.79	-0.476
-0.568	0.372	-0.636	-4.19	0.000752	-2.54	-0.654		-2.08	0.254	-1.1	-3.14	-0.598
-0.536	-0.056	-1.04	-3.93	1.33	-3.44	-1.48		-2.88	0.453	-1.07	-2.42	-0.479
-0.419	0.0699	-0.427	-4.13	0.437	-2.63	-1.11		-2.33	1.42	-0.622	-2.88	-1.06
-0.505	0.0266	0.348	-3.78	0.848	-3.03	-1.11		-1.54	1.95	-0.992	-3.21	-2.34
-0.503	0.22	-1.11	-3.66	-0.0134	-3.23	-1.24		-1.78	0.267	-1	-2.9	-1.57
-0.641	0.0103	-1.38	-4.23	0.386	-3.52	-1.49		-0.275	-0.461	-0.986	-2.5	-0.981
-0.743	0.193	0.131	-3.71	0.397	-3.73	-0.444		-1.85	0.865	-0.896	-3.05	-0.897
-0.796	-0.0816	-1.07	-4.09	0.651	-4.23	-0.892		-1.46	-0.368	-1.22	-3.21	-1.14
-0.813	0.171	-0.0657	-3.35	-0.339	-3.11	-0.211		-1.23	-1.14	-1.18	-3.06	-1.25
-0.768	0.973	-0.566	-3.64	0.115	-2.46	-0.703		-2.62	-0.358	-1.41	-3.26	-0.888
-0.753	1.11	-0.633	-3.16	-0.514	-3.64	-0.569		-1.17	-1.11	-1.3	-2.87	0.0118
-0.795	0.533	-1.08	-3.75	0.0435	-3.15	-1.01		-1.95	0.244	-1.5	-2.85	-0.891
-0.678	0.844	-0.845	-3.47	-0.113	-3.16	-0.472		-1.51	-0.877	-1.53	-2.91	-0.992
-0.449	0.717	-1.35	-3.82	-1.38	-3.36	-0.169		-2.03	0.319	-1.62	-2.61	-0.9
-0.492	0.451	-0.261	-3.54	0.199	-3.23	-0.363		-1.36	-1.04	-1.79	-2.8	-0.159
-0.422	0.492	-0.992	-4.01	0.543	-3.35	-0.636		-3.1	0.864	-1.77	-2.61	-0.448
-0.524	0.835	-0.861	-2.69	0.552	-2.99	-0.658		-1.6	-0.101	-1.6	-2.77	0.000596
-0.551	0.586	-1.76	-3.35	-0.404	-2.84	0.231		-1.46	-0.214	-1.73	-2.42	-0.573
-0.522	0.527	-2	-3.3	0.678	-3.32	-0.143		-2	0.0995	-1.7	-3.14	-1.16
-0.557	0.542	-1.6	-3.26	-0.361	-3.04	-0.208		-2.32	0.594	-1.71	-2.79	-0.259
-0.586	0.213	-0.14	-4.06	0.667	-3.33	-0.351		-2.11	0.0196	-1.3	-2.82	0.632
-0.573	0.459	-0.73	-3.82	-0.492	-2.87	-0.166		-1.83	0.298	-1.15	-2.33	-0.653
-0.611	0.425	-1.05	-3.99	1.29	-3.39	-0.129		-1.5	-0.353	-1.04	-2.88	-0.0304
-0.611	0.19	-1.91	-4.12	-0.695	-2.98	0.0797		-2.06	-0.629	-1.14	-2.99	-0.606
-0.593	0.444	-1.75	-3.77	0.459	-3.44	-0.0581		-1.93	0.195	-1.14	-3.4	-0.804
-0.462	0.454	-1.14	-4.23	-0.362	-3.34	0.467		-2.74	-0.497	-1.08	-3.12	-0.45
-0.54	0.272	0.869	-4.38	0.801	-3.54	0.122		-3.24	0.502	-1.04	-3.43	-1.32
-0.646	0.0758	-0.795	-3.49	-0.911	-3.79	0.0379		-1.41	-0.436	-1.34	-2.61	-1.63
-0.596	0.0155	-0.105	-3.97	0.334	-3.99	0.25		-1.46	-0.598	-1.45	-2.67	-0.826
-0.628	0.169	-0.351	-4.01	0.23	-3.62	0.713		-1.93	-1.49	-1.17	-3.01	-1.32
-0.636	0.127	-0.692	-3.79	-0.14	-3.29	-0.0255		-1.71	-0.23	-0.959	-2.5	-0.827
-0.557	0.221	-0.222	-3.48	0.965	-3.26	0.531		-2.11	-0.904	-0.773	-3.04	0.571
-0.698	0.0454	-1.04	-3.99	-0.158	-2.97	0.324		-2.72	-0.315	-0.717	-2.75	-0.105
-0.602	-0.0687	-1.02	-3.53	0.427	-3.4	0.505		-2.03	-1.28	-1.03	-2.63	0.438
-0.724	-0.167	0.265	-4.11	0.103	-2.9	0.307		-2.35	0.195	-0.747	-2.56	0.258
-0.677	-0.0573	-1.13	-4.2	-0.763	-3.35	0.761		-1.58	-0.646	-0.944	-2.95	-0.6
-0.654	1.14	-0.196	-3.55	0.467	-2.65	0.231		-1.99	-1.87	-1.29	-1.93	-1.05
-0.736	0.102	0.632	-3.85	0.836	-3.3	0.164		-1.82	-0.217	-0.922	-3.13	-1.37
-0.759	0.128	-1.23	-4.52	-0.298	-3.48	1.27		-2.21	0.59	-1.45	-3.21	-1.28
-0.792	0.278	-0.863	-3.98	0.0353	-3.23	0.671		-2.13	-0.413	-1.26	-2.99	-1.06
-0.848	0.444	0.309	-3.96	0.366	-2.24	0.437		-2.39	-0.583	-1.1	-2.67	0.0964
-0.893	0.115	-0.883	-3.72	-0.378	-1.95	0.878		-1.87	0.527	-1.81	-2.4	0.698
-0.878	-0.0862	-0.379	-3.43	-0.538	-1.94	0.659		-2.57	-0.325	-1.53	-2.65	-0.198
-0.864	0.0496	0.286	-3.45	-0.887	-2.16	0.17		-1.79	0.618	-1.5	-2.65	0.266
-0.89	0.133	-1.27	-3.76	0.715	-1.74	1.35		-3.25	0.466	-0.992	-2.28	0.15
-0.933	0.168	-0.272	-3.58	-0.444	-2.39	1.11		-2.34	-1.28	-1.58	-2.89	-0.206
-0.876	0.0696	-0.429	-3.76	1.43	-2.31	0.787		-2.37	0.0409	-1.13	-2.54	0.351
-0.899	0.134	-0.74	-3.05	0.762	-2.95	1.56		-2.01	-0.556	-0.852	-2.42	-0.0014
-0.952	-0.0587	-1.01	-3.69	0.0592	-3.03	1.25		-1.66	0.494	-0.692	-2.6	-1.86
-0.945	-0.132	-0.36	-2.85	-0.0148	-2.53	1.54		-2.47	0.495	-0.814	-2.65	0.173
-0.994	0.0455	-1.8	-3.26	0.857	-2.23	0.985		-2.58	-1.3	-0.757	-2.84	-0.414
-0.995	0.122	-0.444	-2.99	0.277	-2.7	0.952		-2.19	-1.39	-1.08	-2.46	0.0881
-0.967	-0.202	0.142	-3.16	0.395	-2.52	0.964		-1.94	0.438	-1.36	-2.52	-0.2
-0.923	0.121	0.244	-2.85	0.0454	-1.98	1.31		-2.56	-1.04	-1.1	-2.56	-0.171
-0.906	0.115	-0.57	-3.09	-0.366	-1.94	0.884		-2.21	-0.148	-1.68	-2.46	-0.642
-0.971	-0.0542	-0.484	-2.97	0.4	-2.49	1.77		-1.88	0.831	-1.69	-3.42	-0.109
-0.949	0.0395	-1.34	-2.8	0.797	-2.53	0.528		-2.32	1.18	-1.3	-3.09	1.24
-1.03	0.855	-1.56	-2.89	-0.782	-2.63	1.79		-1.93	-0.634	-1.6	-3.34	-0.219
-1.03	0.554	-0.456	-3.06	0.044	-2.41	1.54		-2.42	-1.46	-1.71	-3.51	0.43
-0.992	0.178	-0.474	-3.49	0.603	-2.27	2.06		-1.67	-1.39	-1.45	-2.83	0.434
-0.909	0.487	-1.12	-3.55	-0.439	-3.48	2.27		-2.02	0.0439	-1.98	-2.39	0.686
-0.894	0.682	-1.13	-3.21	0.0341	-2.43	1.16		-2.05	-1.03	-1.42	-2.37	-0.689
-0.996	0.438	-1.03	-3.99	0.0142	-2.18	2.51		-0.977	0.333	-1.15	-2.49	0.981
-0.813	0.525	-0.196	-3.01	0.139	-2.85	0.917		0.17	-0.832	-1.07	-2.61	-0.374
-0.85	0.195	-1	-3.2	-0.303	-2.84	1.54		-0.619	-0.722	-1.26	-2.83	-0.0373
-0.767	0.389	-1.44	-3.07	0.944	-2.36	2.2		-1.17	-1.09	-1.45	-3.12	-1.93
-0.791	0.0658	-0.0133	-3	0.197	-2.55	1.48		-0.575	-0.334	-0.915	-3.18	0.105
-0.752	0.359	-1.18	-2.28	0.561	-2.94	1.65		-0.254	-0.588	-0.792	-2.81	0.545
-0.691	0.632	-0.0813	-2.53	0.598	-2.19	2.17		-1.01	-0.874	-0.373	-2.95	-0.326
-0.636	0.57	-0.618	-3.05	0.369	-3.26	1.9		-2	-0.723	-0.602	-2.62	0.0964
-0.694	1.92	-1.06	-2.81	0.149	-3.66	1.62		-1.92	-0.492	-0.339	-2.62	0.051
-0.861	1.17	1.22	-2.59	-0.347	-2.76	2.35		-0.95	-0.0287	-0.521	-3.18	0.0697
-0.91	1.48	0.701	-2.46	0.0803	-3.81	2.03		-1.32	-0.284	-0.612	-2.94	-1.18
-0.992	1.14	-1.04	-3.29	-0.697	-3.23	1.98		-0.894	-1.12	-0.544	-2.74	-0.618
-0.97	1.64	0.388	-2.47	-0.989	-3.29	2.86		-0.996	-1.04	-1.02	-2.44	-0.204
-0.913	1.56	-0.119	-2.85	-0.974	-2.64	3.06		-1.97	0.132	-1.47	-3.33	-0.59
-0.902	1.7	0.157	-3.26	0.507	-3.08	2.38		-1.51	0.679	-1.65	-3.18	-1.63
-0.883	1.42	-0.527	-2.8	0.661	-2.97	2.93		-1.2	-0.739	-1.45	-2.68	-0.035
-0.809	1.81	-0.928	-2.77	1.22	-2.41	2.97		-1.97	-0.344	-1.45	-3.06	-0.171
-0.897	2.27	0.774	-2.4	0.945	-2.81	2.2		-0.843	0.463	-1.41	-3.36	-0.287
-0.878	2.19	0.0171	-2.09	-0.971	-3.15	1.84		-1.23	-0.407	-1.54	-3.28	-1.24
-0.901	2.34	-0.861	-1.97	-0.0288	-3.02	1.8		-0.904	-1.14	-1.47	-3.88	-0.00336
-0.903	2.18	-0.651	-2.37	-0.266	-2.42	2.05		-2.18	-1.32	-1.49	-3.63	0.0956
-0.925	1.99	0.0419	-3.52	0.608	-3	1.41		-1.04	-0.673	-1.79	-2.84	-0.383
-0.978	2.27	0.281	-2.47	-0.351	-3.22	1.64		-0.886	-0.527	-1.99	-3.51	-0.0735
-0.87	1.75	-0.512	-2.09	-0.885	-3.58	1.48		-1.91	-0.812	-1.52	-3.76	-1.76
-0.907	1.94	1.02	-1.62	-0.424	-2.33	1.41		-0.809	-1.84	-1.26	-2.65	-1.19
-0.815	2.88	-0.119	-2.43	0.206	-2.52	1.6		-0.969	-0.932	-1.4	-2.89	-0.253
-0.802	2.54	-0.215	-1.65	-0.147	-2.99	0.839		-0.979	-0.205	-1.4	-2.7	-1.5
-0.812	1.79	0.769	-2.03	-0.0479	-2.5	0.694		-1.01	0.546	-1.73	-3.14	-0.364
-0.867	1.79	1.28	-1.84	0.304	-2.61	1.26		-1.63	-0.298	-1.72	-3.06	-0.184
-0.828	1.99	-0.398	-1.94	0.688	-2.65	0.976		-0.917	-0.936	-1.86	-2.84	-1.7
-0.867	1.93	-0.125	-1.21	0.647	-1.98	1.1		-0.508	-0.228	-1.24	-2.82	-0.883
-0.822	2.05	0.556	-2.19	0.392	-1.08	0.937		-1.47	-1.11	-1.49	-3.19	-0.518
-0.875	1.93	0.111	-2.33	0.848	-1.14	0.804		-0.979	0.118	-1.24	-2.74	0.536
-0.784	1.59	1.61	-2.08	-0.837	-1.32	0.371		-0.778	-1.11	-1.23	-3.75	1.25
-0.81	1.77	0.376	-3.08	-0.0828	-1.89	0.615		-1.63	-0.687	-1.17	-3.39	-0.148
-0.782	1.52	0.49	-1.87	0.155	-1.71	1.29		-0.543	-0.654	-1.15	-2.91	0.0254
-0.664	1.58	-1.23	-2	0.0219	-1.29	0.847		-1.4	0.977	-1.26	-3.96	-1.09
-0.611	1.32	1.67	-1.92	-1.12	-1.44	1.44		-1.92	-1.67	-1.55	-3.84	-1.54
-0.724	1.32	1.56	-1.82	-0.276	-1.88	1.39		-2.4	-0.298	-1.62	-3.78	0.501
-0.639	1.26	0.525	-1.17	0.862	-2.02	1.73		-1.76	-0.341	-1.57	-3.11	-0.308
-0.702	0.934	0.993	-1.28	1.04	-2.69	1.7		-1.37	0.115	-1.07	-3.55	-0.495
-0.77	0.96	0.0752	-1.35	1.24	-2.72	2.18		-2.36	-1.26	-0.986	-3.87	0.213
-0.844	0.926	-0.454	-1.86	0.0306	-2.77	1.41		-3.09	0.679	-1	-2.85	-0.448
-0.813	0.808	-1.2	-1.96	-0.289	-1.4	1.59		-2.52	-0.692	-0.817	-3.15	-0.0066
-0.786	0.605	0.695	-1.98	0.382	-0.391	1.5		-2.14	-0.643	-1.19	-3.07	0.882
-0.867	0.359	0.177	-1.17	0.677	-1.34	1.08		-3	-0.646	-0.517	-3.61	0.268
-0.738	0.529	0.0228	-0.789	-0.548	-0.817	1.11		-2.68	0.0528	-0.584	-2.95	-0.347
-0.708	0.382	2.01	-1.39	0.474	-0.748	0.855		-1.58	-0.998	-0.351	-2.98	0.139
-0.688	0.266	3.54	-1.14	0.0705	-0.948	0.773		-2.07	-0.482	-0.972	-3.27	0.371
-0.629	0.435	2.41	-0.838	-0.657	-1.06	0.726		-1.84	-0.773	-0.751	-3.2	0.686
-0.694	0.463	2.84	-1.32	0.538	-1.24	0.544		-1.35	0.899	-0.748	-3.2	1.54
-0.676	0.291	4	-0.963	-0.359	-1.29	0.817		-1.95	-0.832	-0.996	-2.76	0.374
-0.706	0.427	3.6	-1.14	0.361	-1.07	0.942		-2.27	-0.147	-0.908	-2.72	-0.245
-0.714	0.199	2.88	-0.848	-0.525	-1	1.92		-1.68	-0.528	-0.789	-3.18	0.571
-0.736	0.317	1.51	-0.425	0.136	-0.665	1.2		-1.61	-1.5	-0.704	-3.42	0.29
-0.722	0.0351	2.58	-0.368	0.504	-1.42	1.53		-3.08	-0.00171	-0.685	-2.94	-0.146
-0.72	0.12	2.57	-1.74	-0.315	-1.14	1.51		-3.33	-0.439	-0.232	-3.17	-0.566
-0.635	0.916	3.76	-1.87	-0.0647	-0.986	1.38		-2.74	-0.824	-0.717	-3.49	-0.0705
-0.747	0.246	3.36	-1.02	0.613	-0.215	1.45		-1.84	-0.674	-0.88	-3.48	-0.702
-0.757	0.351	4.61	-0.538	1.69	-0.425	1.14		-2.13	0.249	-1.51	-3.58	-0.543
-0.717	-0.132	2.42	-0.593	0.115	-1.15	1.5		-0.704	-2.17	-1.18	-3.45	-0.63
-0.671	0.0373	2.46	-1.02	-0.513	-1.48	2.06		-1.33	0.0374	-1.48	-3.76	-1.47
-0.66	-0.257	2.27	-0.853	0.926	-1.02	1.39		-0.955	-0.992	-1.13	-3.25	-1.2
-0.602	-0.107	2.93	-1.21	0.994	-0.879	1.27		-1.28	-0.777	-0.815	-3.27	-0.312
-0.625	0.0284	2.15	-0.951	0.627	-0.829	0.935		-2.16	-0.582	-1.25	-3.33	-0.718
-0.634	-0.0138	2.44	-1.66	-0.208	-1.47	1.42		-2.05	-0.987	-0.993	-2.99	0.0294
-0.766	-0.0578	2.94	-0.714	1.62	-0.377	1.9		-3.14	-1.73	-0.709	-3.16	-0.751
-0.656	-0.153	3.36	-1.23	-0.0233	-1.08	1.13		-1.67	-2.73	-0.682	-3.09	-0.597
-0.698	0.0237	3.45	-1.01	-0.139	-0.49	1.38		-2.3	-0.181	-0.532	-3.32	0.068
-0.791	-0.168	2.06	-1.17	0.862	-0.487	0.94		-3.23	-1.77	-0.641	-3.61	-0.105
-0.76	-0.183	3.38	-1.9	0.309	-0.923	0.849		-2.65	-0.824	-0.487	-3.31	0.573
-0.946	-0.283	2.16	-1.59	0.75	-1.2	0.702		-2.27	-0.663	-0.951	-3.28	0.115
-0.937	-0.201	3.67	-1.41	0.55	-1.05	0.62		-1.6	-0.265	-0.455	-3.33	-0.0177
-0.952	-0.294	2.42	-0.787	0.0928	-1.45	0.85		-2.14	-1.2	0.0202	-3.12	-0.145
-0.771	0.0265	2.97	-1.16	0.125	-1.48	1.71		-2.51	-0.482	-0.231	-3.5	-1.22
-0.913	0.59	2.9	-0.338	0.241	-1.64	1.03		-2.44	-0.531	-0.166	-3.52	-0.378
-1.03	-0.335	3.79	-0.334	-0.476	-2.04	1.52		-2.89	-0.207	-0.606	-3.09	-1.39
-0.859	-0.182	2.87	-0.838	0.0483	-1.87	0.993		-3.6	-1.95	-0.262	-2.88	-0.0159
-0.791	-0.22	2.14	-1.87	0.0616	-1.49	1.22		-3.27	-0.603	-0.525	-2.77	-0.645
-0.809	-0.15	3.35	-1.72	-0.297	-1.46	0.408		-2.95	-2	-0.335	-3.1	-0.989
-0.827	-0.249	3.29	-1.48	0.281	-1.87	0.772		-2.5	0.0608	-0.446	-2.92	1.39
-0.808	-0.188	3.68	-1.4	0.718	-1.27	0.521		-2.25	-1.33	-0.739	-3.13	-0.0152
-0.673	0.0298	2.89	-1.68	1.02	-1.94	0.44		-1.18	-1.18	-0.662	-2.89	-0.0761
-0.759	0.0046	2.58	-1.52	-0.521	-3.58	0.348		-1.78	-0.299	-0.62	-3.35	-0.164
-0.53	-0.496	2.63	-0.964	-0.217	-3.95	0.011		-1.58	-1.77	-0.431	-2.03	-1.24
-0.245	-0.103	2.48	-1.06	0.512	-3.73	0.274		-1.66	-1.8	-0.159	-2.73	-0.342
-0.302	-0.377	3.29	-1.82	-0.287	-3.08	0.032		-1.95	-1.47	-0.154	-2.95	-0.428
-0.398	-0.39	3.64	-2.51	1.29	-2.46	0.616		-1.32	0.116	-0.244	-2.96	-0.276
-0.368	-0.135	3.3	-1.58	0.72	-3.4	1.25		-1.38	-1.56	-0.137	-3.3	0.324
-0.386	-0.195	2.94	-1.29	1.04	-2.56	1.78		-1.34	0.374	-0.296	-2.67	0.514
-0.432	-0.286	2.52	-1.53	0.295	-3.44	1.22		-1.48	-0.0889	-0.0818	-3.08	-1.14
-0.615	-0.125	2.86	-0.947	0.656	-2.99	1.46		-2.78	0.278	0.123	-3.13	0.247
-0.589	-0.134	2.36	-1.28	1.09	-3.25	0.654		-1.68	-0.257	-0.321	-3	-0.986
-0.561	-0.0199	2.16	-1.95	1.03	-2.55	0.795		-2.89	-1.15	0.244	-3.49	-1.27
-0.671	1.07	2.86	-1.42	0.0795	-2.52	0.98		-2.83	-0.834	-0.89	-3.35	-2.41
-0.757	0.0102	3.19	-1.15	0.813	-3.11	0.544		-2.7	0.226	-0.694	-3.57	-1.32
-0.732	0.365	2.28	-0.523	-0.239	-3.06	0.348		-1.86	-0.505	-0.715	-3.34	-0.733
-0.543	0.0384	2.17	-1.08	1	-2.81	0.118		-1.94	-0.568	-0.595	-3.27	-0.93
-0.566	0.0248	2.34	-1.02	0.387	-2.44	0.799		-2.53	1.11	-0.614	-3.21	-0.419
-0.533	-0.0804	3	-0.903	0.346	-2.03	0.41		-1.61	-0.387	-0.223	-2.94	-1.38
-0.731	-0.0915	2.14	-1.04	0.383	-2.91	0.348		-2.36	-0.696	-0.14	-3.71	-2.01
-0.687	-0.0869	3.58	-1.54	0.341	-2.95	0.689		-2.6	-0.177	0.0788	-2.94	-2.38
-0.624	0.0418	2.39	-0.789	-0.347	-2.67	0.216		-2.96	-0.642	-0.00318	-3.23	-1.24
-0.552	-0.168	3.01	-0.946	0.524	-2.92	0.456		-2.94	1.06	0.499	-3.22	-1.69
-0.478	-0.014	3.46	-0.589	1.8	-3.05	0.332		-3.23	-0.867	0.535	-3.56	-1.47
-0.57	0.00851	2.29	-0.872	-0.875	-2.41	-0.00499		-3	-0.539	0.637	-3.28	-0.862
-0.677	-0.031	2.52	-0.858	0.957	-2.98	-0.0895		-2.21	0.425	1.24	-3.82	-0.16
-0.709	0.17	2.59	-1.03	0.305	-3.22	0.0549		-0.992	-1.32	1.26	-3.47	-1.53
-0.755	-0.0609	1.45	-0.999	-0.295	-2.06	-0.137		-2.15	-0.0509	1.82	-3.25	-1.79
-0.784	-0.0819	3.07	-2.19	-1.03	-2.68	0.292		-2.55	-0.217	1.49	-3.48	-0.683
-0.664	0.372	3.54	-1.03	1.51	-2.45	0.564		-4.01	0.0772	1.4	-3.52	-0.557
-0.593	0.0921	0.757	-1.3	0.829	-3.08	0.363		-3.84	-1.44	0.971	-3.49	-0.593
-0.696	0.242	2.22	-1.63	0.955	-2.85	0.227		-2.44	0.0151	0.83	-3.48	-0.404
-0.686	0.562	2.15	-0.421	0.385	-2.63	0.275		-2.81	-0.574	0.861	-3.54	0.384
-0.711	0.216	2.64	-1.57	0.193	-2.79	-0.738		-2.57	-0.00433	0.73	-3.72	0.262
-0.676	0.331	2.24	-0.67	-0.236	-3.64	-0.172		-2.6	3.19	0.83	-3.59	-1.26
-0.65	1.55	2.67	-0.706	-0.234	-3.15	-0.0434		-2.75	0.301	0.85	-3.81	-1.4
-0.666	0.822	0.836	-0.559	0.349	-2.47	-0.416		-2.22	-0.0493	1.1	-3.62	-2.39
-0.445	0.59	0.774	-1.38	-0.714	-2.4	0.287		-2.29	-0.77	0.656	-3.18	0.029
-0.146	0.818	1.66	-0.78	-0.768	-1.88	-0.0543		-3.88	-0.341	1.51	-3.91	-1.01
-0.0297	0.74	2.22	-1.01	1.05	-1.56	-0.208		-3.25	-0.851	1.72	-3.39	0.11
-0.0589	1.25	1.63	-1.32	1.71	-1.75	0.361		-3.3	-0.765	1.59	-3.97	-0.97
-0.223	1.27	3.3	-1.04	0.045	-2.11	0.0574		-3.18	0.641	1.28	-3.52	0.000178
