# Supplementary material for: Metabolic sensing in AgRP neurons integrates homeostatic state with dopamine signalling in the striatum
Source: eLife journal article supplement (doi:10.7554/elife.72668), 2022-01-12
Supplement: fig1-data1 [file Fig1H.xlsx]

## Sheet: Sheet1
	Agrp GCamp								Agrp Crat
-60 to -10	-0.0027967	-0.0017659	-0.0028128	6.721e-05	-0.0002771	0.00162945	-0.0008746		-0.0039994	0.00018165	0.00268706	0.00082389	0.00076768
-10 to 0	-1.40755	-0.17153	0.186853	0.356607	-0.0299682	-0.773798	-0.388963		-1.48125	-0.117344	0.343556	1.03353	-0.320805
0 to10	-1.44845	0.74388	0.84018	-0.567279	0.911853	-2.19902	0.46039		-2.1472	-0.110497	-0.782114	1.64034	-0.455263
10 to 30	-0.969688	-0.341516	-0.0671114	-3.2001	0.556641	-4.14956	-0.852067		-2.21671	-0.210588	-1.76016	-1.6164	-1.15484
10 to 60	-0.848021	-0.0062498	0.320692	-2.9645	0.389829	-3.38899	-0.442786		-2.22003	-0.281856	-1.33939	-2.34375	-0.87374
