# Supplementary material for: Metabolic sensing in AgRP neurons integrates homeostatic state with dopamine signalling in the striatum
Source: eLife journal article supplement (doi:10.7554/elife.72668), 2022-01-12
Supplement: fig1-data1 [file Fig1J.xlsx]

## Sheet: Sheet1
Agrp GCamp														Agrp Crat
0.551	-0.598	1.97	-0.0075	-1.62	1.94	-1.46	0.19	0.255	1.45	1.6	-1.17	0.844	2.94	0.572	0.0716	0.293	0.755	-0.128	-0.208	0.574	-0.579	-0.463	-0.639	0.984	0.384
0.494	0.0212	1.87	0.292	-1.24	1.41	-0.978	-0.204	0.0669	2.39	2	-0.766	0.215	2.44	0.438	-0.0309	0.481	-0.332	0.812	-0.708	0.0122	-0.811	-0.896	-0.716	0.826	-0.00594
0.39	-0.287	1.92	-0.0602	-1.03	0.916	-2.37	0.313	-0.107	2.07	1.1	-1.41	-0.193	1	0.542	0.382	1.28	-0.468	0.283	-0.779	0.914	-0.78	-0.687	-0.846	0.864	0.221
0.213	-0.384	1.72	-0.274	-1.33	0.772	-1.63	1.85	-0.00921	2.81	1.73	0.469	0.121	2.47	0.402	0.436	0.636	0.201	-1.41	-0.229	1.3	-0.536	-0.811	-0.615	0.705	0.537
0.315	0.468	1.6	-0.677	-1.38	0.321	-1.93	-0.196	-0.267	2.29	1.5	-1.37	-0.547	1.71	0.686	-0.451	-0.148	0.0357	-0.623	-0.0386	0.599	-0.582	-0.758	-0.893	0.679	0.361
0.697	-0.43	1.43	-0.361	-1.37	0.547	-0.751	0.403	0.447	3.83	3.88	-1.41	-0.526	2.03	0.592	-0.353	0.0409	0.655	-0.2	-0.228	-0.256	-0.743	-0.868	-0.875	0.86	0.483
0.783	0.342	1.62	0.328	-1.51	0.473	-0.548	0.0663	-0.0622	2.17	2.09	-1.59	-0.52	2.53	0.176	-0.181	-0.423	0.573	-0.0694	-0.21	-0.141	-0.741	-0.738	-0.601	0.739	0.687
0.603	0.275	1.45	0.717	-1.66	0.662	-0.271	-0.00503	0.374	2.62	1.95	-0.773	-1.31	2.01	-0.0188	-0.147	-0.601	0.055	-1.02	0.453	0.13	-0.682	-0.751	-0.991	0.626	-0.143
1.65	-0.301	1.56	0.182	-1.5	1	-0.354	1.19	0.00494	2.23	0.334	-1.57	-1.06	0.773	0.53	-0.0256	-0.912	0.0465	0.807	0.543	0.38	-0.821	-0.987	-1.02	0.983	0.513
0.942	-0.143	1.85	0.256	-1.17	1.26	-1.77	0.703	-0.362	1.7	-0.997	-1.89	-0.139	1.3	0.861	0.0252	-1.38	0.395	0.415	-0.271	-0.0325	-0.925	-0.958	-0.957	0.962	1.12
0.729	-0.159	1.91	0.244	-0.409	0.888	-0.0992	-0.0557	-0.141	1.92	0.257	-0.851	0.0666	1.42	0.564	-0.471	-0.366	0.0232	0.405	-0.313	1.12	-0.806	-0.952	-1.21	0.558	0.592
0.394	0.0549	1.79	-0.309	-0.904	1.1	-1.93	-0.28	-0.137	1.56	1.4	-0.39	-0.183	1.04	0.519	0.106	-0.429	0.72	0.81	-0.102	1.41	-1.05	-0.783	-1.06	0.679	0.749
1.04	0.611	1.85	-0.546	-0.768	0.519	-1.42	1.81	-0.053	0.476	1.4	-2.43	-0.157	0.785	0.373	-0.422	-0.321	1.2	0.415	-0.476	1.33	-0.959	-0.837	-0.979	0.266	0.685
0.228	-0.0346	1.65	-0.205	-0.848	0.62	-0.659	0.548	-0.115	0.769	1.12	-2.12	-0.417	1.35	0.187	-0.0783	-0.7	1.64	0.924	-0.578	1.36	-0.899	-0.673	-0.19	0.375	0.0747
-0.211	-0.0946	1.77	0.0564	-0.25	0.362	-0.581	1.04	0.266	2.15	0.521	0.221	-0.256	1.23	0.287	-0.687	0.458	1.5	0.296	-0.209	0.842	-0.163	-0.425	-0.768	0.693	-0.224
0.11	-0.0104	1.39	0.106	-0.156	0.558	-0.283	0.367	-0.244	0.997	0.795	-1.76	-0.538	0.852	0.145	-0.713	0.242	1.66	0.0335	-0.477	0.586	0.418	-0.575	-0.471	0.269	-0.328
-0.0595	0.495	1.28	0.22	-0.107	0.872	-0.583	1.65	-0.266	1.57	0.529	-0.188	0.163	1.24	0.352	-1.3	0.193	0.97	0.292	-0.638	0.768	0.582	-0.622	0.499	0.484	-0.691
0.133	0.573	1.25	0.427	0.236	1.01	-0.789	-0.456	-1.01	1.56	0.587	-1.85	0.452	2	0.229	-0.977	0.286	0.64	-0.579	-0.346	0.31	0.148	-0.426	0.634	0.202	0.379
0.339	0.619	1.6	-0.0631	-0.517	0.612	-0.315	-0.938	-0.864	0.821	0.568	-1.27	1.08	1.84	1.03	-0.678	0.0657	0.963	-0.482	-0.197	-0.0859	-0.125	-0.488	0.372	0.343	0.468
0.991	-0.0655	1.44	0.449	-0.406	0.451	-0.58	0.706	-0.941	1.14	0.053	-0.791	1.21	0.788	0.831	-1.18	0.599	1.01	0.221	-0.338	-0.622	-0.264	-0.432	0.316	0.316	0.753
1.06	0.509	1.23	0.693	-1.1	-0.0322	-0.461	0.287	-0.503	0.229	-0.1	0.0811	1.55	1.32	0.914	-0.93	-0.00264	1.14	-0.707	-0.941	-0.281	-0.242	-0.656	0.436	0.997	0.259
1.27	-0.131	1.3	-0.0346	-1.03	-0.497	-1.44	0.187	-0.649	1.32	-0.985	-0.474	1.25	1.83	0.516	-0.619	0.568	0.832	0.0184	-0.565	0.727	-0.524	-0.715	-0.0221	0.971	-0.556
0.676	-0.347	1.5	0.0445	-0.1	-0.525	-1.71	0.256	-0.807	1.02	-0.727	-0.973	1.29	0.249	0.516	-0.845	-0.829	1.06	-0.723	-0.419	-0.234	-0.469	-0.862	-0.0424	0.961	-0.68
0.722	-0.259	1.31	-0.2	0.047	-0.196	-0.896	1.18	-0.301	1.46	0.327	-1.22	1.59	1.06	0.769	-0.676	-0.0141	1.11	-0.182	-0.0405	-0.751	-0.253	-1.18	-0.11	0.654	-0.81
0.59	-0.483	1.05	-0.355	-0.154	0.28	0.258	0.639	-0.756	0.721	-0.608	-1.01	1.43	1.27	1.01	-0.465	-0.277	1.17	-0.345	-0.526	0.606	-0.408	-0.487	-0.265	0.477	-0.354
0.905	0.434	0.778	-0.181	-0.0417	0.719	-1.37	0.205	-0.174	0.965	0.834	-0.352	1.51	2	0.722	-0.891	0.135	1.09	-0.297	0.0374	-0.081	-0.601	-0.731	0.202	1.04	0.0948
0.532	0.335	0.843	-0.337	-0.611	0.199	-1.09	-0.248	-0.0465	0.916	0.617	-0.775	0.811	1.28	0.631	-0.946	0.756	0.882	0.0352	0.443	0.422	-0.497	-0.544	-0.219	0.736	-0.348
0.537	0.306	0.801	0.00948	-0.976	0.00566	-0.903	0.175	-0.0569	1.71	1.28	-1.2	0.586	0.939	-0.00702	-1.06	0.481	1.26	-1.24	-0.111	-0.0467	-0.768	-0.789	0.0851	0.868	-0.17
0.521	0.433	0.942	-0.69	-1.62	0.128	-1.11	0.68	-0.127	0.334	0.63	-0.503	-0.275	0.369	0.912	-1.46	0.423	0.612	-0.627	-0.207	0.515	-0.732	-1.12	0.108	0.437	0.252
0.464	1.26	1.03	-0.62	-1.02	-0.501	-1.71	0.91	-0.22	1.55	0.204	-0.763	0.929	0.313	0.487	-1.35	0.634	0.854	0.0358	0.276	-0.0837	-0.719	-1.06	-0.171	0.664	0.274
0.696	0.519	0.735	-0.873	-0.542	0.283	-2.04	-0.359	-0.371	1.19	0.479	0.191	0.964	0.378	0.397	-1.02	0.311	0.642	-1.34	0.214	0.148	-0.7	-1.24	-0.252	0.412	0.0758
0.34	0.722	0.961	-1.43	-1.36	1.1	-1.69	-0.907	-0.0308	1.03	-0.0227	-0.644	0.264	0.408	-0.255	-1.49	0.406	0.987	-1.16	0.564	0.403	-0.676	-1.47	-0.0379	0.627	-0.465
0.262	0.258	0.923	-1.1	-1.35	1.21	-1.53	-0.775	-0.0433	0.812	1.02	-1.37	0.584	0.682	-0.128	-1.73	0.491	1.49	-1.74	0.25	0.475	-0.811	-1.19	0.0057	0.507	0.291
0.579	0.199	0.92	-0.735	-0.625	0.94	-1.22	0.307	-0.34	1.21	0.286	1.11	0.594	0.282	-0.0974	-2.05	0.502	1.25	-0.811	0.732	0.375	-0.791	-0.901	-0.425	0.635	0.572
0.526	-0.113	1.11	-0.312	-1.16	0.913	-1.31	0.0175	0.0735	1.77	-0.0675	-0.634	0.142	0.142	0.741	-2.45	1.21	-0.483	-0.872	0.25	0.294	-0.583	-0.404	-0.231	0.141	0.945
0.414	-0.591	1.27	-0.441	-1.16	0.506	-0.873	-0.335	-0.17	1.34	-0.148	-0.83	-0.0124	0.269	-0.674	-2.26	0.579	-0.579	-1.19	0.609	1.16	-0.409	-0.583	-0.313	0.163	0.758
0.71	-0.0508	1.21	-0.91	-1.01	-0.137	-0.62	-0.181	0.142	0.251	0.191	-0.161	-0.431	-0.0756	0.154	-2.2	0.978	-0.196	-1.02	0.142	1.15	-0.673	-0.869	-0.221	0.0427	-6.95e-05
0.557	-0.227	1.39	-0.897	-1.04	-0.338	-0.977	0.331	-0.146	1.02	1.24	0.31	0.773	-1.42	-0.192	-2.43	1.33	0.284	-0.688	0.288	-0.615	-0.744	-0.928	0.104	0.0518	0.42
0.346	0.292	1.09	-1.1	-1.09	-0.375	-1.11	1.06	-0.295	0.253	1.16	-1.13	2	-0.53	0.14	-2.4	1.15	0.162	-0.951	0.199	0.752	-0.793	-1.17	0.0599	-0.0393	0.731
0.269	-0.418	1.07	-0.649	-1.05	0.0794	-0.945	1.32	-0.463	0.554	1.08	-0.572	1.46	-1.24	0.113	-1.59	0.739	-0.159	-0.914	-0.346	-0.525	-0.693	-1.45	0.0338	-0.0594	0.982
0.366	0.167	1.15	-0.764	-1.36	0.0733	-1.48	0.286	-0.505	0.0857	1.58	-0.0752	1.45	-0.0192	0.389	-1.82	0.537	0.243	0.223	0.253	0.739	-0.671	-1.03	-0.0025	0.122	0.772
0.268	0.733	1.18	-0.375	-1.6	-0.237	-0.678	0.0564	-0.735	0.134	1.44	0.744	1.46	-0.011	0.383	-1.12	0.484	0.198	0.0441	-0.0872	0.524	-0.727	-1.25	0.128	0.105	0.543
0.435	0.595	1.02	0.0039	-1.97	-0.583	-0.543	0.531	-0.284	0.119	1.01	-0.584	1.27	-0.213	0.388	-1.2	1.17	0.454	0.0493	-0.476	-0.155	-0.875	-1.62	-0.25	-0.0438	0.4
0.239	0.584	1.32	-0.48	-1.77	-0.62	-1.11	1.18	-0.801	-0.855	1.68	-1.3	1.82	-0.0968	0.576	-2.06	1.15	0.203	-0.259	-0.899	0.045	-0.788	-1.06	0.131	0.0384	0.177
0.282	0.451	1.06	-0.802	-1.16	-1	-1.19	0.538	-1.25	0.386	1.74	0.137	1.58	0.995	0.249	-2.23	0.73	0.299	0.422	-1.22	0.711	-0.818	-1.02	-0.0461	0.408	0.105
0.598	-0.135	0.912	-1.02	-1.36	-0.879	-0.584	0.527	-0.65	0.872	2.25	0.454	1.42	1.76	0.33	-1.96	1.61	-0.104	-0.704	-0.785	-0.789	-0.681	-0.682	-0.18	0.0177	0.4
0.349	-0.323	0.82	-1.31	-1.48	-1.02	-1.19	0.334	-0.243	0.376	1.72	-0.18	1.7	1.19	-0.214	-1.1	1.76	0.232	-0.0135	-0.909	-0.967	-0.751	-0.761	-0.426	0.04	-0.135
0.634	-0.594	1.25	-0.39	-1.07	-1.56	-0.225	0.236	-0.153	0.172	1.9	-0.558	1.61	-0.067	-0.422	-1.05	1.12	-0.149	0.122	-0.972	-0.775	-0.682	-0.796	-0.522	0.233	-0.161
0.933	-0.706	0.824	-1.28	-1.98	-1.32	-1.31	0.778	-0.24	0.493	1.76	-0.00448	0.0321	-1.11	0.114	-1.3	1.46	-0.126	-0.181	-1.24	-1.28	-0.959	-0.777	-0.266	-0.0341	0.131
0.542	-0.187	0.781	-0.916	-1.93	-1.78	-0.127	0.0136	-0.493	0.761	0.624	-0.921	1	-1.19	0.54	-1.41	1.1	0.313	0.106	-1.22	0.427	-1.05	-0.619	-0.522	0.0328	-0.499
0.543	-0.336	0.559	-1.57	-1.28	-1.56	-0.901	0.493	-0.317	0.366	-0.0728	-0.502	1.17	0.535	0.267	-1.59	0.487	-0.253	-0.0937	-1.27	-0.229	-1.08	-0.403	-0.356	-0.197	-0.318
0.598	-0.291	0.671	-1.46	-1.59	-0.993	-0.763	0.193	-0.462	0.909	-0.19	-0.252	-0.174	0.36	0.393	-1.2	1.04	0.375	-0.54	-1.33	1.5	-0.889	-0.859	-0.0973	-0.17	0.695
0.866	-0.58	0.66	-1.01	-1.42	-1.62	-0.887	0.297	-1.06	1.07	1.67	-0.398	0.12	-0.296	0.445	-1.27	0.987	0.00202	-0.989	-1.37	0.225	-0.903	-0.73	-0.229	-0.237	0.0743
0.966	-0.357	0.539	-0.851	-1.36	-1.51	-0.124	0.442	0.374	1.54	2.36	-1.5	-0.394	-0.762	-0.129	-1.41	0.623	-0.197	-1.28	-0.868	-0.241	-0.636	-0.939	-0.785	-0.187	1.18
0.735	-0.123	0.579	-1.07	-1.62	-1.48	-0.358	0.0216	-0.415	1.29	2.44	-0.47	-0.16	-0.803	0.919	-1.36	0.109	-0.259	-0.63	-1.29	-0.887	-0.676	-0.891	-0.467	-0.4	0.619
0.452	0.936	0.771	-1.75	-1.98	-1.76	-0.213	0.225	-0.53	0.288	2.88	-1.04	-0.442	-1.86	0.341	-0.87	-0.124	-0.117	-1.32	-0.747	0.833	-1.04	-0.806	-0.824	-0.366	0.731
1.17	0.955	0.751	-0.54	-2.19	-1.58	-0.68	-0.0397	-0.388	1.02	1.59	-0.306	-0.384	-1.85	0.5	0.0233	-0.516	0.486	-0.507	-0.822	0.863	-0.799	-1.24	-0.592	-0.709	0.358
1	0.561	0.381	-0.76	-1.83	-1.18	-0.197	0.587	0.104	0.45	0.735	-1.6	-0.176	-1.41	1.32	0.295	-1.52	0.0867	-0.401	-1.28	-0.119	-0.195	-0.936	-0.793	-0.722	-0.00271
0.99	-0.00385	0.712	-0.291	-1.14	-1.46	-0.654	-0.712	-0.168	0.899	0.771	0.119	-0.688	-0.146	1.03	0.696	-0.686	0.13	-0.635	-0.949	0.59	1.16	-0.739	-0.611	-0.98	-0.00727
1.06	-0.0195	0.552	-0.515	-0.962	-1.44	-0.523	-0.657	0.457	1.23	0.72	-1.23	-0.95	0.296	0.851	0.439	-0.875	-0.102	-0.715	-1.22	0.704	1.84	-0.65	-0.676	-0.824	0.78
1.1	1.04	0.611	-0.661	-1.48	-1.4	-0.893	1.18	0.194	0.571	2.56	-0.412	-0.405	0.502	0.739	0.32	-0.388	0.175	-0.907	-1.2	-0.604	1.74	-0.734	-0.696	-0.643	2.82
1.07	1.65	0.585	-0.619	-1.83	-1.87	-0.989	1.18	0.281	0.3	0.438	-0.333	0.105	0.284	0.468	-0.468	-0.904	-0.221	-0.77	-1.69	-0.00379	1.53	-1.03	-0.443	-0.514	3.21
0.939	0.72	0.564	-0.616	-1.98	-1.2	-0.415	0.775	-0.216	-0.0787	1.57	-0.39	0.918	-0.851	0.127	-0.21	-0.123	0.269	-0.74	-1.09	-0.344	1.42	-0.775	-0.536	-0.572	4.21
0.954	-0.84	0.644	-0.669	-2.53	-1.54	0.578	0.977	0.0689	0.88	0.06	0.979	-0.11	-1.13	0.506	-0.285	-0.404	0.426	-0.0193	-1.04	-1.94	1.32	-0.755	-0.828	-0.737	3.67
1.06	-0.631	0.327	-0.284	-2.24	-1.52	0.704	0.748	0.0868	0.463	0.799	0.163	0.783	-0.155	0.475	-0.425	1.1	0.223	-1.05	-0.978	-2.57	1.25	-1.21	-0.123	-0.694	2.66
0.472	-0.845	0.0574	-0.417	-1.8	-1.35	-0.736	1.19	-0.246	0.0707	1.3	0.136	0.248	0.0952	0.679	-0.897	1.99	0.172	-1.06	-1.12	-1.87	1.24	-1.25	0.148	-1.18	2.41
0.575	-0.439	0.605	-0.807	-1.86	-1.08	-0.81	1.73	0.0215	-0.319	0.446	-0.324	1.39	-0.249	0.451	-0.173	0.864	0.323	-0.321	-1.18	-1.35	1.13	-1.35	-0.143	-0.578	2.44
0.764	-0.425	0.747	-1.33	-1.42	-1.09	-0.903	1.01	-0.244	0.0773	-0.755	-0.336	0.573	0.0879	0.201	-0.294	0.498	0.281	0.886	-0.739	0.0812	1.44	-1.35	-0.0517	0.353	2.05
0.935	0.546	0.639	-1.65	-1.94	-1.29	-1.21	0.352	-0.108	0.311	-0.296	0.0869	1.08	-1.03	-0.31	-0.407	0.193	0.367	-0.085	-1.18	-0.998	1.19	-1.03	-0.255	0.121	1.68
0.293	0.0789	0.716	-1.98	-1.62	-1.56	-1.33	0.166	-0.545	0.907	-0.0133	0.578	0.94	0.334	-0.22	-0.109	0.929	0.144	-0.828	-1.6	-1.22	0.807	-0.966	-0.441	0.12	1.43
0.0357	0.256	0.663	-2.24	-1.11	-0.852	-0.351	-0.296	-0.384	-0.219	0.323	-0.0544	0.695	-0.12	-0.251	-0.542	1.07	0.216	-0.661	-1.21	-1.2	0.732	-0.895	-0.351	0.0118	1.85
-0.179	0.153	0.431	-1.91	-1.01	-1.04	-1.16	-0.0878	0.0154	0.323	-0.131	0.685	1.19	0.6	-0.144	-0.56	0.847	-0.365	-0.0462	-1.49	-1.8	0.575	-0.805	-0.533	0.111	1.1
-0.563	0.318	0.414	-1.48	-0.447	-1.49	-1.04	0.199	-0.404	-0.543	0.559	2.31	0.852	1.64	0.0115	-0.566	0.631	-0.213	-0.413	-1.55	-2.37	0.284	-0.681	-0.643	-0.0343	0.761
-0.627	-0.00641	0.199	-1.24	-0.487	-1.24	-0.87	0.396	0.371	-0.0996	0.481	0.557	0.756	1.2	-0.147	-0.681	1.22	0.122	-1.66	-1.17	-1.61	0.442	-0.765	-0.554	0.144	1.74
-0.783	-1.29	0.367	-1.54	-0.435	-1.25	-0.682	1.37	0.669	0.403	0.687	-0.153	0.968	0.844	0.193	-0.101	1.44	-0.366	-0.163	-1.53	-1.27	0.395	-1.36	-0.585	0.0489	1.2
-0.666	0.699	0.00526	-1.57	-0.433	-1.4	-0.899	2.69	0.145	-0.243	-0.583	-1	1.39	1.01	0.0569	0.413	1.28	0.519	-0.211	-1.66	-2.66	0.374	-1.63	-0.773	-0.31	1.4
-0.381	0.465	-0.896	-1.29	-0.69	-1.18	-1.55	1.69	0.381	-0.303	-0.0828	0.634	0.446	0.613	-0.169	0.47	0.811	-0.124	-0.428	-1.2	-2.28	0.741	-1.72	-0.561	-0.0538	1.78
-0.0583	-0.147	-0.825	-1.26	-1.12	-0.846	-1.54	0.568	0.238	-0.157	-0.321	1.98	-0.00729	-0.197	-0.206	-0.439	1.37	-0.4	0.0422	-1.57	-1.9	0.37	-1.75	-0.0708	-0.563	1.05
0.0552	-0.409	-0.915	-1.07	-0.749	-0.378	-2.51	1.5	-0.232	0.37	0.879	-0.267	0.0541	-0.847	-0.641	-0.104	0.278	-0.964	-0.856	-1.51	-1.73	-0.129	-1.28	-0.0474	-0.228	0.924
-0.177	-0.545	-1.18	-1.03	-0.246	-0.319	-1.64	1.08	0.449	-0.287	0.652	0.365	-0.593	-0.389	-0.797	-0.507	-1.42	-0.62	-0.24	-1.04	0.364	-0.376	-1.29	0.265	-0.174	1.53
-0.106	-0.511	-0.973	-0.675	-0.409	-0.425	0.369	1.37	0.212	-0.548	0.442	0.345	-0.832	0.559	-0.219	-1.18	-0.0688	-0.613	-0.3	-1.27	0.715	0.0835	-0.444	0.256	-0.0359	1.51
-0.527	-0.0659	-0.711	-0.621	-0.6	-0.517	-0.371	1.04	0.367	-0.151	-1.07	1.18	-1.01	0.685	0.686	-0.276	-0.0674	-0.585	0.0907	-1.7	0.425	-0.165	-0.564	0.149	-0.193	1.42
-0.681	0.518	-0.816	-0.792	-0.633	-0.482	-1.08	1.1	0.729	-0.306	-1.27	2.01	-0.762	1.02	0.669	-0.765	-0.415	-0.997	0.431	-1.52	0.0115	0.609	-0.812	-0.252	-0.194	0.536
0.426	0.578	-0.683	-0.269	-0.959	-1.07	-1.87	0.768	0.165	0.0763	-1.09	1.8	-0.271	0.662	0.603	-0.661	-1.32	-0.522	-0.295	-1.58	0.713	0.544	-0.57	0.113	0.000883	0.443
0.437	-0.0162	-0.0345	-0.302	-1.11	-0.903	-1.14	-0.833	0.726	0.554	0.0865	0.352	-0.65	0.561	0.684	-0.347	-0.635	-0.417	-0.723	-1.74	1.44	0.387	-0.785	-0.354	-0.0794	0.122
0.701	-0.13	-0.205	-0.513	-1.51	-0.039	-1.23	1.34	0.612	1.06	-0.451	-0.211	-0.57	0.0617	0.202	-0.977	0.129	-0.412	-0.649	-2.36	1.19	0.111	-1.3	-0.6	-0.0562	0.544
0.787	0.443	0.0355	0.105	-1.12	-0.531	-0.933	1.93	0.367	0.452	-0.0889	1.13	-0.952	0.746	0.344	-0.591	0.514	-0.324	0.326	-1.53	1.14	0.22	-1.43	-0.602	-0.321	0.483
1.36	0.0393	-0.129	-0.725	-0.898	-0.532	-0.621	1.42	1.2	1.09	-1.01	0.531	-1.23	0.841	-0.176	-0.509	0.465	0.233	-0.236	-2	0.853	-0.123	-1.65	-0.584	0.0753	0.75
1.51	-1.14	-0.333	-0.619	-1.23	-0.952	-0.666	0.635	1.02	0.788	0.812	0.82	-1.08	0.809	0.00333	-0.557	0.755	-0.3	0.273	-1.51	0.165	-0.22	-1.62	-0.458	-0.0492	0.366
1.35	-0.575	-0.271	-0.445	-1.01	-0.59	-1.3	0.746	0.587	0.468	-0.0441	-0.034	-0.78	0.341	0.0828	-0.146	1.33	-0.644	0.21	-1.73	-0.679	-0.126	-1.25	-0.177	-0.332	0.813
0.728	0.0501	-0.291	-0.118	-1.1	-0.963	-0.636	2.12	0.303	0.847	-0.381	0.526	-1.6	-0.66	0.183	-0.393	1.25	-0.634	0.453	-1.41	-1.39	-0.141	-1.55	-0.27	-0.467	0.464
0.72	-0.205	-0.356	-0.369	-0.664	0.06	-0.527	1.36	1.01	0.768	0.131	0.181	-0.842	-0.692	0.586	-0.359	1.01	-0.687	0.0212	-1.73	-0.282	-0.234	-1.28	0.0403	-0.464	0.826
0.0557	-0.00581	-0.419	0.217	-0.906	0.339	-0.379	2.63	0.719	1.62	0.275	1.35	0.077	-0.501	1.4	-0.614	1.81	-0.853	0.248	-1.74	-0.231	-0.0832	-1.42	0.477	-0.569	0.775
-0.105	-0.885	-0.183	0.0489	-0.852	-0.379	-0.892	2.14	0.613	1.25	-0.735	0.15	-0.309	-0.375	1.14	-0.395	1.24	-0.745	0.737	-1.78	-0.154	-0.0711	-1.53	0.727	-0.546	0.364
0.101	-0.842	-0.674	-0.223	-0.636	-1.03	-0.552	1.82	0.803	1.39	0.587	1.84	1.24	0.406	1.09	-0.414	0.872	-0.705	0.044	-1.43	0.231	-0.0464	-1.34	0.517	-0.558	1.13
0.554	-1.62	-0.504	-0.054	-0.834	-1.35	-0.992	0.682	0.955	0.768	-0.578	0.861	0.926	0.66	1.37	-0.348	0.0331	-0.127	-0.327	-1.72	0.528	-0.204	-0.971	0.234	-0.59	1.07
-0.28	-2.01	-0.469	0.0501	-0.702	0.0272	-2.13	-0.309	0.731	1.19	-0.698	0.33	0.841	0.696	1.51	-0.299	0.154	-0.505	-0.123	-1.62	-0.025	-0.228	-0.283	0.625	-0.607	1.14
-0.05	-1.44	-0.278	0.211	-0.943	0.0347	-1.63	0.341	1.12	1.02	-0.601	0.852	1.5	-0.776	1.32	-0.00448	-0.0445	-0.46	-0.0286	-1.33	0.353	-0.241	0.0667	0.399	-0.0137	1.06
0.55	-1.24	-0.541	0.721	-0.668	-0.0968	-2.05	0.337	1.19	0.951	-0.265	0.258	1.74	-0.00153	1.66	-0.175	-0.209	-0.565	0.124	-0.665	1.74	-0.537	-0.272	0.169	0.307	1.05
0.62	0.591	-0.804	0.514	-0.457	0.124	-1.18	-0.548	0.704	0.638	0.0802	1.06	1.72	-0.399	1.48	-0.96	0.357	-0.218	-0.0828	-0.901	-0.111	-0.928	-0.619	0.346	0.383	0.858
0.682	-0.00814	-0.643	0.343	-1.04	-0.296	-1.63	0.242	1.01	0.463	-1.32	-0.48	1.77	0.534	1.73	-1.03	-0.333	-0.184	-1.29	-1.04	0.73	-0.791	-0.842	0.386	0.311	0.769
0.647	0.846	-1.01	0.562	-1.39	-0.193	-0.31	0.4	0.468	-0.0181	0.0573	1.16	1.59	0.435	1.72	-0.67	0.503	0.00502	-0.909	-1.55	1.32	-0.61	-0.908	0.268	0.824	0.348
0.132	0.995	-1.01	0.345	-1.57	0.102	-1.05	0.414	-0.0787	-0.527	-0.797	-0.279	1.84	0.334	1.1	-0.361	0.195	-0.37	-1.83	-1.17	1.22	-0.606	-0.839	0.872	1.43	0.271
-0.335	1.36	-0.595	0.117	-1.35	0.84	-0.416	-0.641	0.827	-0.0535	0.251	2.46	1.32	0.589	1.82	-0.0651	-0.508	-0.396	-1.31	-0.654	0.943	-0.444	-0.581	0.305	1.62	0.472
-0.267	0.845	-1.07	0.183	-1.4	0.6	0.128	0.457	0.132	0.429	-0.685	0.532	-0.287	0.491	0.922	0.24	0.405	-0.206	-1.51	-1.46	2.15	-0.293	-0.67	0.571	1.11	0.652
0.371	0.556	-1.35	0.406	-1.08	-0.0468	0.285	-0.0626	0.574	1.69	0.0406	0.351	0.706	0.463	1.22	0.384	0.619	-0.71	-1.09	-1.72	1.85	-0.422	-1.05	0.427	0.813	0.894
2.23	1.18	-1.41	0.484	-1.51	0.152	-1.14	1.57	1.06	1.2	-0.537	0.725	2	0.181	0.628	0.0502	1.07	-1.14	-0.748	-1.12	1.8	-0.464	-1.38	0.793	1.02	0.338
2.77	0.916	-1.29	0.119	-1.24	0.772	-1.06	0.202	0.912	1.39	1.72	0.641	1.79	-0.247	1.24	0.378	0.93	-0.795	-1.24	-1.38	1.45	-0.432	-1.44	2.13	1.4	0.103
2.37	0.72	-1.43	-0.384	-1.2	0.591	-0.67	0.793	1.07	1.17	1.06	0.808	1.13	0.201	0.913	0.364	0.637	-0.907	-0.913	-1.2	2.02	-0.345	-1.02	2.66	1.26	0.0725
1.95	1.13	-1.01	-0.352	-1	0.959	-0.906	0.915	0.866	0.725	0.998	-0.364	1.57	0.11	0.281	0.183	-0.112	-0.907	-1.43	-1.05	1.73	-0.273	-0.936	2.15	1.22	-0.68
1.69	0.934	-1.22	-0.0845	-0.33	1.79	0.084	0.323	0.758	0.245	-0.0278	0.379	1.33	0.21	-0.12	-0.156	-0.285	-0.835	-0.944	-1.06	1.75	-0.572	-0.739	2.03	0.795	0.278
1.31	0.855	-0.971	-0.543	0.282	2.8	0.487	0.631	0.582	0.951	0.633	-0.0902	1.6	0.15	0.257	-0.128	-0.122	-0.894	-1.03	-1.63	2.66	-0.526	-0.902	1.97	0.712	-0.57
1.72	0.319	-0.577	-0.652	-0.184	3.04	-0.336	0.0384	0.434	1.31	-0.371	0.519	2.63	-0.759	0.46	0.464	-0.128	-0.77	-0.369	-1.67	1.65	-0.712	-1.33	1.62	0.94	0.0734
1.94	-0.289	-0.442	-0.702	-0.451	2.51	-0.147	0.081	0.294	1.21	1.13	-0.0906	3.67	-0.394	0.611	0.478	0.439	-0.853	-0.861	-2.08	1.18	-0.799	-1.7	1.65	0.965	-1.01
1.65	0.528	-0.538	-0.882	-0.689	2.37	-1.66	1.55	0.203	1.2	0.583	0.486	2.59	-0.143	0.573	0.23	0.0152	-1.16	-0.161	-1.33	1.45	-0.704	-1.59	1.3	0.297	-0.462
1.79	-0.121	-0.547	-0.56	-0.966	1.95	-0.284	1.91	0.0183	0.0037	-0.19	1.19	2.95	1.07	-0.0789	-0.21	-0.285	-0.769	-0.676	-1.51	0.891	-0.651	-0.881	1.73	0.41	-1.01
1.83	0.446	-0.474	-0.0608	-0.668	1.85	-0.24	1.2	0.598	-0.00796	-0.231	1.23	1.91	1.48	-0.644	-0.465	0.0941	-0.399	-0.431	-0.863	0.906	-0.504	-1.29	1.16	0.0637	-0.444
1.18	-0.287	-0.717	-0.124	-0.788	1.63	-1.29	-0.579	0.589	0.843	-0.54	1.01	1.06	1.9	0.366	-0.404	-0.0745	-0.521	-0.00323	-0.936	0.579	-0.471	-1.15	1.5	0.301	-0.196
1.25	-1.05	-0.891	-1.08	-1.27	1.65	-0.597	1.01	0.234	0.867	-0.56	0.343	1.74	1.02	2.01	-0.0943	-1.18	-0.536	0.089	-1.3	-0.235	-0.303	-0.689	1.54	0.347	-0.361
1.33	-0.503	-0.663	-1.01	-1.1	1.59	-0.489	1.2	0.588	0.749	-0.639	-0.577	1.92	1.42	2.39	-0.074	-0.0839	-0.457	-0.253	-1.81	0.486	-0.627	-0.786	1.69	0.645	-0.983
0.98	0.0171	-0.554	-0.453	-1.14	1.33	0.0647	-0.273	0.805	0.484	0.0655	0.743	1.1	1.44	2.67	-0.0347	-1.18	0.0111	-0.489	-1.48	0.878	-0.759	-0.919	2.03	0.651	-0.602
0.874	0.0346	-0.827	-0.0434	-1.19	1.23	-1.16	0.383	0.944	-0.553	-0.205	2.58	0.878	2.03	3.01	0.107	-0.151	-0.356	0.266	-1.46	0.166	-0.495	-1.01	2.37	0.248	-0.212
0.367	-0.274	-0.718	-0.345	-1.28	0.75	-1.1	0.623	0.502	0.223	0.369	1.35	1.02	2.19	3.1	-0.161	-1.03	-0.551	-0.693	-1.3	-0.751	-0.569	-1.07	2.3	0.372	-0.447
0.104	-0.347	-0.882	-0.849	-1.26	0.502	-1.73	0.39	0.0338	-0.947	0.309	0.775	1.42	1.99	1.54	0.0153	0.286	-0.771	-0.147	-0.656	0.511	-0.468	-1.34	2.55	0.234	-0.63
0.216	-0.409	-0.867	-1.53	-0.782	0.741	-0.511	0.402	-0.473	-1.26	0.482	0.673	0.761	1.12	0.992	-0.114	-0.0948	-0.591	-0.481	-1.3	-0.451	-0.734	-1.44	2.36	0.351	-0.0425
0.584	-0.171	-0.575	-0.886	-1.07	0.883	0.0857	0.819	-0.0186	-1.4	1.73	-0.126	0.895	0.32	1.69	-0.314	1.15	0.0212	-0.575	-1.29	-0.7	-0.336	-1.51	2.24	0.379	-0.412
1.46	0.172	-0.311	-0.125	-0.466	0.338	0.143	0.0874	-0.389	-0.943	-0.416	0.286	1.22	-0.0644	1.43	-0.454	0.594	-0.676	-0.679	-1.5	-0.511	-0.786	-1.34	1.92	0.626	-0.0755
1.22	0.538	0.0705	-0.0516	-0.232	0.757	0.194	1.16	-0.387	-0.157	-0.32	1.34	0.941	-0.0307	1.2	0.157	-0.145	-0.431	-1.32	-1.06	-1.41	-0.849	-1.22	1.79	1.92	-0.796
1.17	0.169	0.203	0.0226	-0.583	0.505	-0.115	0.784	-0.384	-0.3	-1.12	0.245	1.38	1.39	0.906	-0.0862	-0.826	-0.221	-1.35	-1.47	0.85	-0.823	-1.34	2.38	2.91	-1.65
1.34	-0.313	0.239	-0.828	-0.585	0.742	-0.753	0.908	-0.175	-0.148	-0.531	-0.659	1.35	0.933	1.1	0.749	0.109	-0.0885	-0.674	-1.82	0.207	-0.865	-0.976	2.55	3.37	-1.77
1.15	0.0104	0.295	-0.0838	0.155	0.257	-1.02	-0.0729	-0.26	-1.23	-0.657	1.55	1.35	-0.665	0.77	0.544	-0.315	-0.688	-0.00291	-1.5	-0.573	-1.01	-1.2	2.25	2.9	-0.177
0.804	0.252	0.273	-0.841	0.0137	-0.138	-1.6	0.921	-0.23	-0.61	-1.46	0.54	1.58	-1.21	0.578	0.57	0.371	-0.357	-1.22	-1.21	-0.0961	-1.11	-1.04	2.07	2.8	-0.767
1.24	0.358	0.127	-0.12	0.12	0.916	-0.807	-0.495	-0.148	-1.12	-0.798	1.95	2.41	-2.16	0.234	0.559	0.149	-0.159	-1.09	-0.997	-1.02	-1.06	-1.42	2.27	2.88	-1.22
1.07	-0.205	0.11	0.352	-0.137	2.17	-0.598	0.612	-0.416	-0.952	0.404	0.187	1.28	-0.446	0.408	0.786	-0.0852	-0.0387	-0.438	-0.00182	1.24	-0.468	-1.39	1.84	2.39	-0.45
1.01	-0.249	0.245	1	-0.669	2.72	-0.902	2.07	-0.121	-0.0775	-0.176	0.39	2.19	-0.0919	0.342	0.811	-0.929	-0.38	0.237	0.437	0.441	0.0921	-1.41	2.16	2.05	0.652
0.738	0.374	0.0232	0.824	-0.12	2.18	-1.06	1.77	0.0992	0.311	-1.1	0.0501	2.94	-0.0221	0.209	0.836	-0.762	-0.572	-0.954	1.49	-0.321	0.204	-1.64	1.89	2.04	-0.0295
0.763	-0.139	-0.265	0.828	-0.664	1.75	-0.855	1.02	-0.343	-0.356	-0.419	1.29	2.31	-0.302	-0.478	0.177	-0.273	-0.684	0.0103	1.23	-0.356	-0.0644	-1.7	1.69	2.09	-0.124
0.759	-0.69	0.112	1.65	-1.05	1.25	-0.0769	1.64	0.0582	0.013	0.462	1.03	1.69	-0.574	-0.0381	-0.598	-0.253	-1.05	-0.0173	1.2	-1.87	-0.119	-1.62	1.55	2.2	0.204
0.758	-0.436	-0.0919	1.59	-0.326	0.931	-0.601	1.05	0.139	-0.922	-0.169	0.429	1.68	-0.279	-0.279	-0.511	-0.721	-0.889	-0.553	0.915	-1.84	0.0134	-1.39	1.46	1.85	-0.118
0.778	-0.0193	-0.296	1.43	0.2	0.812	-0.0337	1.85	0.216	-0.791	0.266	0.911	2.4	-0.213	0.108	-0.467	-1.03	-1.05	-0.691	0.376	-1.14	-0.293	-1.47	1.41	1.72	0.526
0.324	0.00827	-0.252	1.35	-0.514	-0.0361	0.745	-0.00555	0.304	-0.298	-1.53	0.966	2.15	0.11	-0.31	-1.3	-1.14	-0.627	-0.207	0.423	-2.29	-0.37	-1.4	1.68	1.42	0.414
0.142	0.875	0.11	1.55	0.00253	0.484	-0.43	-0.16	0.112	0.248	0.0417	1.12	2.1	-0.428	0.0915	-1.4	0.563	0.0477	-0.126	0.427	-1.06	-0.342	-1.22	1.84	1.66	0.775
0.655	0.429	0.0176	1.66	-0.308	1.88	-0.146	1.08	-0.109	-0.647	0.114	0.551	1.64	0.261	0.393	-1.11	0.234	-0.0967	0.491	-0.0959	-0.489	-0.375	-1.25	1.87	1.55	-0.0446
0.69	-0.161	-0.118	1.14	-0.509	1.23	-0.0177	0.389	0.166	0.09	0.442	0.769	1.94	-0.241	0.224	-1.41	0.263	-0.125	-0.318	-0.391	-0.891	-0.261	-1.09	1.9	1.62	-0.704
0.194	-0.0801	0.0918	0.707	0.356	0.823	-0.363	-0.051	0.989	-0.555	-0.335	0.944	1.74	0.0613	-0.207	-1.57	0.0669	-0.399	-0.221	-0.0782	-1.14	-0.449	-1.29	2.03	1.4	0.134
0.327	-0.139	0.287	0.151	0.613	0.786	0.0032	-1.37	0.811	-0.431	0.187	-0.55	1.47	-0.608	-0.162	-0.723	0.249	-0.539	-0.339	-0.277	-0.411	-0.617	-1.37	1.67	1.82	-0.138
0.45	-0.268	0.204	0.339	0.87	1.38	0.0836	-0.784	0.271	-0.45	0.67	0.483	1.21	-1.17	-0.717	-1.44	0.854	-0.853	-0.164	-0.196	0.136	-0.458	-0.747	1.64	2.56	-0.16
0.312	-0.212	0.0144	0.392	0.823	1.53	0.00388	0.808	-0.476	-0.979	-0.741	-0.552	0.394	-0.585	-0.588	-1.13	1.42	-0.304	0.735	-0.59	-0.995	-0.0826	-0.956	1.42	2.4	-0.678
0.0308	-0.531	-0.0316	0.388	0.887	1.63	1.11	-0.328	-0.302	-0.483	-0.548	-0.609	1.17	0.424	-0.654	-1.1	1.18	-0.32	0.282	-0.24	-1.24	0.33	-0.481	1.56	2.31	-0.859
-0.105	-0.421	-0.0625	0.387	0.668	1.85	0.574	-0.597	-0.305	0.184	-0.856	0.716	-0.0396	-0.177	-0.1	-1.09	1.22	-0.35	0.435	-0.592	-0.594	0.49	0.16	1.42	2.03	-0.324
0.229	-0.241	-0.452	0.981	0.53	1.67	1.22	-0.669	-0.149	0.0749	0.223	0.155	0.781	-0.821	-0.555	-0.912	1.87	0.559	0.952	-0.0932	-0.321	0.101	0.284	0.921	2.3	0.512
0.156	-0.479	-0.133	1.28	0.0356	2.28	0.909	-0.137	0.14	-0.402	-0.118	0.322	0.398	-0.677	-0.53	-1.81	1.4	0.0505	0.397	1.23	-0.261	0.158	0.0436	1.16	2.16	-0.201
0.014	-0.257	-0.134	2.09	0.0236	0.695	1.16	0.0594	-0.27	-0.111	0.814	0.438	1.49	-1.48	-0.0447	-1.35	1.21	0.176	-0.109	2.19	-0.872	0.015	0.239	1.34	1.85	-0.418
0.464	-0.00443	0.0883	3.43	-0.263	1.44	0.141	0.0854	-0.169	1.21	0.377	-0.69	0.66	-2	-0.0333	-0.993	0.427	0.23	0.366	1.72	0.246	-0.0481	-0.19	0.97	1.85	-0.854
0.606	-1.21	0.371	4.13	-0.295	0.744	-0.21	-0.395	0.436	0.35	-1.24	-0.0356	0.112	-1.8	-0.696	-1.28	-0.161	-0.208	-0.147	1.96	-1.04	-0.3	0.113	1.46	1.92	-0.587
0.58	-1.15	0.123	4.84	-0.197	0.145	-0.182	-0.364	0.0168	-0.179	0.0161	-0.192	0.0859	-1.91	-0.241	-0.569	0.578	0.205	0.181	1.62	0.0125	-0.315	0.206	1.42	1.94	-0.102
0.352	-0.396	0.0649	4.07	-0.338	0.799	0.284	0.0258	1.01	0.691	-0.373	-0.0866	-0.211	-1.22	0.397	-0.708	-0.476	0.517	-0.227	1.45	-0.875	-0.363	-0.125	1.09	2.8	-0.719
0.18	-0.375	-0.176	4.21	0.013	0.667	0.258	-1.08	1.09	1.02	0.448	-3.45e-06	-0.123	-1.04	0.249	-0.541	-0.219	0.428	-0.0804	1.55	-0.319	-0.201	0.309	1.04	3.06	-0.44
-0.298	-0.346	0.0105	4.37	-0.384	0.764	-0.192	0.196	0.879	0.442	0.59	0.515	-0.111	-0.937	0.0796	-1.06	-0.684	0.597	0.438	1.11	-0.0603	-0.263	0.48	0.855	3.17	-0.707
-0.582	-1.42	0.361	3.35	-0.301	0.342	-0.105	-0.314	1.36	-0.374	0.488	-0.578	0.374	-1.4	0.785	-0.909	-0.349	0.706	0.277	0.639	-0.647	-0.448	0.317	0.944	2.67	-0.917
-0.551	-0.616	0.3	2.93	-0.0811	0.647	0.837	0.0757	1.47	-0.785	1.21	-0.716	0.414	-1.54	0.447	-0.876	-0.511	0.365	0.404	0.544	-1.33	-0.347	-0.246	0.759	2.71	-1.39
-0.543	-0.723	0.24	2.76	0.193	0.0733	-0.305	-0.707	1.52	0.237	-0.618	-0.351	-0.261	-2.2	0.489	-0.737	-0.244	0.831	0.141	0.339	-1.35	-0.127	-0.602	0.512	2.31	-1.41
0.14	-0.325	0.25	2.31	0.137	0.577	-0.439	-0.886	1.09	1.25	-0.0971	0.596	-0.399	-1.5	0.566	-0.751	0.142	0.148	-0.354	0.805	-1.44	-0.139	-0.605	0.744	2.62	-0.644
0.0871	-0.664	0.324	2.07	-0.439	-0.0137	-0.871	-0.973	1.48	1.87	0.433	1.59	-0.199	-0.863	0.397	-0.654	0.365	-0.222	-0.764	0.49	-0.393	-0.27	-0.437	0.661	2.22	-1.58
-0.352	-1.17	0.238	2.08	-0.351	0.313	-0.766	-0.211	1.36	1.25	-0.73	1.11	-0.436	-1.22	0.343	-0.734	1.1	0.271	-0.766	0.587	-1.36	-0.229	-0.498	0.683	2.51	-1.12
-0.875	-0.152	0.155	1.51	0.284	0.171	-0.684	-0.882	0.642	1.28	0.176	-0.083	0.00943	-1.02	-0.0355	-0.683	0.964	0.636	-0.342	0.18	-1.16	-0.508	-0.00811	0.992	2.19	-1.45
-0.774	-0.868	-0.00348	1.6	0.0825	1.09	-0.301	-0.156	1.38	2.07	1.19	0.221	-0.311	-1.37	0.63	-1.21	0.277	0.418	-1.1	0.0573	-0.19	-0.275	-0.329	0.644	1.94	-1.59
-1.19	-0.906	-0.0306	0.991	-0.534	0.193	0.458	-0.305	0.971	2.32	0.352	-0.256	-0.585	-0.514	-0.298	-1.05	0.284	-0.105	-1.25	0.0322	-1.58	-0.525	-0.267	0.354	1.36	-1.01
-1.43	-0.481	-0.0817	0.581	-0.536	-0.0102	1	-0.706	0.94	2.06	0.571	0.222	0.515	-1.19	0.23	-1.05	0.944	0.136	-1.41	0.264	-0.279	-0.341	-0.303	0.451	0.992	-1.34
-1.19	-0.539	-0.00523	0.819	0.158	-0.0453	1.1	-0.661	0.596	0.726	0.469	-0.04	0.0689	-0.82	-0.346	-0.764	0.228	0.582	-1.34	0.54	-0.563	-0.239	-0.527	0.734	1.43	-1.17
-1.1	-0.176	-0.211	1.66	0.274	-0.798	1.36	0.124	1.08	0.749	-0.747	-0.152	-0.276	-0.846	-0.00746	-0.926	0.547	-0.0344	-0.854	0.406	-1.43	-0.293	-0.477	0.588	1.21	-1.05
-1.33	-0.136	-0.2	0.789	0.557	0.563	1.11	-1.09	1.21	0.437	-0.337	0.505	-0.175	-1.58	0.208	-1.35	0.203	0.16	-1.21	0.683	-1.67	-0.338	-0.24	0.237	1.12	-1.1
-0.856	0.126	0.27	0.758	0.103	0.196	1.11	-1.11	1.52	-0.372	-0.711	0.502	-0.518	-1.13	-0.133	-1.23	-0.0792	0.194	-1.77	-0.0155	-2.15	-0.29	-0.495	0.471	1.13	-0.862
-0.594	-0.0744	-0.0985	0.469	0.347	0.0387	1.31	-0.826	0.849	-0.272	0.163	1.51	-0.728	-1.31	-0.248	-1.78	0.0393	0.582	-1.96	0.712	-3.12	-0.245	-0.391	0.57	1.06	-1.09
-0.566	0.173	-0.131	0.945	-0.0186	-0.42	1.11	-1.43	1.12	-0.97	-0.282	-0.508	-0.399	-1.28	-0.471	-1.12	0.0235	0.638	-1.03	0.52	-2.52	-0.427	-0.214	0.908	0.982	-0.854
-1.33	-0.987	-0.093	0.0424	0.361	-0.759	0.204	-1.41	1.44	-0.378	0.234	-0.32	-0.526	-0.905	-0.594	-0.939	0.371	0.27	-1.77	0.324	-1.94	-0.293	-0.59	0.887	0.8	-0.52
-0.553	-0.997	-0.291	-0.416	-0.353	0.0461	1.37	-0.485	1.33	0.699	0.185	-0.341	-0.537	-1.51	-0.115	-1.28	-0.373	0.245	-1.05	-0.607	-0.318	-0.283	-0.346	1.11	0.866	-0.816
-0.6	-0.719	-0.657	0.692	-0.166	-1.33	0.33	-1.56	0.691	-1.09	0.108	1.63	-0.691	-0.62	-0.0765	-0.963	0.581	-0.0731	-1.19	0.0126	-0.541	-0.292	-0.415	1.15	0.806	-1.41
-0.208	-1.48	-0.126	1.01	-0.328	-0.565	1.21	-2.28	0.953	-1.78	0.845	0.218	-0.965	-0.128	0.0638	-0.136	0.39	-0.0621	-1.43	-0.559	-1.92	-0.438	-0.328	0.894	0.467	-0.508
-0.439	-0.652	-0.179	0.9	-0.204	-0.513	0.772	-1.58	0.942	-0.854	-0.496	-0.184	0.148	-1.03	-0.0308	-0.417	0.425	0.716	-0.746	-0.321	-0.17	-0.765	-0.0865	1.03	0.551	-1.07
-0.362	-1.21	-0.0889	0.199	-0.041	-1.31	1.58	-0.572	0.928	0.171	-0.617	0.352	0.173	-0.838	-0.0186	-0.278	0.314	0.248	-0.618	-0.207	-0.377	-0.964	-0.206	0.661	0.575	-1.57
-0.715	-0.773	-0.537	0.492	0.187	-1.89	0.947	-0.503	1.01	0.285	-0.36	-0.527	0.911	-0.314	-0.175	-0.311	-0.111	0.628	-0.832	-0.285	-0.567	-0.914	-0.439	0.832	0.639	-1.5
-0.246	-0.376	-0.197	1.23	0.812	-1.1	0.634	-0.759	1.12	0.455	-0.0258	-0.43	0.996	0.338	-0.178	-0.274	-0.34	0.322	-0.991	-0.263	-1.85	-0.868	-0.71	0.578	0.468	-1.79
-0.275	-0.348	-0.0556	0.221	0.788	-0.372	-0.276	-1.25	1.28	0.744	0.755	-1.38	0.26	-0.636	-0.185	0.21	-0.221	0.396	-0.655	-0.0585	-1.25	-0.174	-0.133	0.558	0.807	-1.86
-0.887	-0.811	0.281	0.478	0.956	0.662	0.839	-0.026	1.51	-0.388	1.02	-0.437	-0.472	0.0251	-0.386	0.342	0.153	-0.0735	0.283	-0.083	-1.51	-0.0796	0.427	0.351	0.484	-1.31
-0.845	-0.694	0.537	-0.214	0.28	1.4	1.88	-0.906	1.68	-0.16	0.44	-0.434	0.0327	-1.06	-0.228	0.0394	-0.435	-0.428	0.644	-0.188	-2.39	-0.215	0.541	0.643	0.313	-1.12
-1.36	-0.904	0.364	-0.341	0.117	1.07	2.1	-0.518	1.62	0.287	0.933	-0.852	-0.678	-0.305	-0.463	-0.472	-0.45	-0.515	0.271	-0.405	-1.52	-0.53	0.355	0.69	0.451	-1.5
-1.07	-0.435	0.609	-0.0454	-0.174	0.504	1.63	-0.673	1.8	-0.361	0.674	-0.763	0.0824	-0.641	-0.291	-0.554	-1.32	-0.987	-0.251	-0.211	-2.41	-0.539	0.248	0.599	0.0898	-1.43
-0.605	-0.432	0.802	-0.7	-0.525	0.156	1.63	-0.316	1.79	-0.108	0.0801	-1.96	0.537	-0.929	-0.908	-0.496	-0.79	-0.655	-1.08	0.536	-0.379	-0.402	-0.000241	0.573	-0.13	-1.03
-0.616	-1.2	1.67	-0.61	-1	0.955	1.58	-1.08	1.19	-0.839	-0.479	-0.911	0.276	-0.145	-0.36	-0.342	-1.23	-0.327	-0.375	0.209	-0.0106	-0.308	-0.234	0.534	0.185	-1.53
-0.649	-1.37	2.24	-0.542	-0.206	1.9	2.2	-0.429	0.934	-1.1	0.374	0.119	0.173	0.184	-0.523	-0.674	-0.966	-0.694	-0.0633	0.0487	0.777	-0.401	-0.444	0.599	0.0483	-1.56
-0.861	-1.52	1.89	-0.0916	0.187	1.33	1.86	-1.28	1.34	-0.237	1	-0.355	0.0835	-0.119	-0.258	-0.0782	-1.34	-0.64	-0.192	0.225	1.53	-0.504	-0.464	0.579	-0.275	-1.18
-1.08	-2.09	1.93	0.0743	-0.017	1.2	1.71	-1.35	1.23	0.324	-0.727	0.225	-0.162	-0.0886	-0.497	0.0392	-0.447	-0.784	0.22	0.612	-0.374	-0.605	-0.22	0.622	-0.329	-1.64
-0.98	-0.817	2.14	0.0378	0.382	1.43	2.07	-2.11	1.17	0.698	0.451	-0.333	-0.0879	-0.346	-0.602	0.306	-0.929	-0.702	-0.875	1.63	-0.712	-0.767	-0.357	0.741	-0.326	-1.22
-0.604	-1.66	2.07	-0.322	0.376	2.6	1.09	-1.99	1.27	-0.263	-0.116	-0.6	0.0985	0.207	-0.669	0.0386	-0.283	-0.393	-1.24	1.64	-0.819	-0.781	-0.0397	0.478	-0.573	-1.82
-0.0783	-0.422	2.1	-0.535	-0.0838	2.54	0.989	-0.992	1.04	-0.0255	0.025	-2.33	0.0503	-0.254	-0.201	0.152	-0.245	-0.278	-1.19	1.93	-0.271	-0.81	-0.182	0.482	-0.776	-1.69
-0.202	-0.776	1.91	-0.184	0.381	2.61	0.646	-2.63	1.27	0.344	0.259	-1.24	-0.127	0.703	-0.769	0.351	-0.656	0.0535	-1.35	1.15	0.379	-0.51	-0.557	0.682	-0.505	-1.22
-0.766	-1.74	1.93	-0.285	0.514	2.2	1.17	-2.02	0.959	-0.199	1.55	-2.42	-0.0514	0.327	-1.15	0.0859	-0.833	-0.203	-1.35	1.19	-0.676	-0.867	-0.227	0.561	-0.402	-1.51
-0.908	-1.77	1.91	-0.4	1.46	2.56	0.666	-1.53	0.107	0.418	0.79	0.157	-1.4	-0.091	-1.12	0.836	-1.22	0.171	-0.233	1.32	-0.923	-0.785	-0.245	0.399	-0.356	-1.24
-0.272	-0.776	1.64	-0.64	1.08	2.14	0.0424	-0.598	0.619	0.144	1.16	1.45	-0.552	0.0036	-0.705	0.109	-1.88	0.00755	-0.793	0.966	-0.91	-0.909	-0.292	0.517	-0.404	-1.63
0.306	-1.35	1.58	-0.643	0.971	1.97	0.736	-0.726	0.431	0.226	0.702	-0.0623	0.207	-0.563	-0.966	0.803	-1.65	-1.17	-1.08	1.14	-0.17	-0.555	-0.758	0.589	-0.374	-1.37
0.0374	-2.04	1.8	-0.251	0.754	1.46	1.32	-0.113	0.752	0.967	-1.18	-0.489	0.186	-0.19	-1.02	0.978	-0.922	-1.24	-0.457	0.725	-0.00234	-0.728	-0.461	0.361	-0.37	-1.42
-0.122	-1.79	1.64	-0.469	0.222	1.46	1.34	-1.08	0.095	-0.659	-0.719	0.528	-0.448	-1.54	-0.786	0.482	-1.02	-0.579	-0.00889	0.893	-0.443	-0.746	-0.619	0.475	-0.25	-1.7
-0.49	-1.56	1.59	-0.77	0.129	1.12	1.3	-0.621	-0.0519	0.000914	0.475	-1.19	-0.801	-1.66	-0.477	0.826	-0.976	-0.533	0.0784	0.68	-0.737	-0.77	-0.0747	0.148	-0.407	-1.65
-0.549	-1.19	1.36	-0.363	0.118	0.411	-0.148	-0.113	0.346	-0.63	-0.683	0.181	-0.272	-1.42	-0.125	0.245	-1.97	0.063	-0.301	0.506	-0.614	-0.849	0.00847	0.152	-0.426	-2.01
-0.42	-0.538	1.15	-0.425	0.256	-0.376	0.437	-0.895	0.306	0.282	1.26	1.67	-0.305	-1.72	0.502	0.195	-0.944	0.516	0.462	0.666	0.44	-0.973	0.662	0.0542	-0.581	-2.05
-0.648	-0.384	1.1	-0.332	0.595	-0.702	-0.0213	-0.0775	0.447	-0.788	0.839	-0.247	-0.287	-1.41	-0.259	-0.245	-1.49	0.851	-0.965	0.291	0.0151	-0.97	0.646	0.164	0.243	-2.32
-0.721	0.427	1.22	-1.04	0.626	-0.332	-0.206	0.123	0.85	-1.07	2.7	0.0983	-0.132	-1.86	-0.323	-0.017	-0.673	0.883	-0.716	0.0495	0.324	-0.91	0.762	0.321	-0.0493	-1.53
-0.327	-1.14	1.23	-0.987	0.373	-1	-0.024	-0.392	0.231	0.0339	1.23	0.24	0.394	-1.53	-0.789	0.0535	-1.31	0.133	-0.572	0.638	0.868	-0.964	1.44	0.549	-0.461	-1.05
-0.703	-0.525	1.04	-0.145	0.0252	-1.31	-1.43	0.397	0.566	-0.455	1.78	-0.861	0.0544	-1.35	-0.0968	-0.823	-1.33	0.418	-0.344	0.263	-0.957	-1.19	2.17	0.292	-0.789	-0.887
0.159	-0.741	0.893	-0.337	-0.0455	0.657	-0.892	-0.371	1.01	-0.585	1.09	-1.28	0.617	-1.66	-0.0742	-0.29	-0.826	0.384	-0.201	0.757	-1.27	-1.24	3.41	0.225	-0.613	-1.58
0.665	-0.392	0.847	-0.162	-0.167	1.28	-1.19	-0.172	0.636	-0.909	-0.566	-0.508	1.49	-0.857	-0.11	0.347	-1.83	0.412	0.178	0.171	-0.0366	-1.3	3.17	0.263	-0.832	-1.6
0.661	-0.315	1.11	-0.0635	0.944	1.79	-0.638	-1.23	-0.331	-0.655	-0.188	-0.727	1.36	-0.103	-0.433	0.36	-1.25	0.544	-0.69	0.163	-0.836	-1.12	3.12	0.15	-0.137	-1.16
0.827	-0.672	1.32	0.141	0.722	0.845	-0.943	-1.76	0.495	-0.296	-0.274	0.167	2.19	0.0434	-0.212	-0.155	-1.48	0.922	-0.622	-0.308	-0.224	-0.889	2.54	0.214	0.747	-0.425
0.602	-1.54	0.991	1.1	0.645	1.53	0.332	-0.833	0.27	-0.844	1.36	-0.165	1.28	-0.0836	-0.783	0.0349	-1.21	0.933	-0.239	-0.468	-0.872	-0.786	2.42	0.248	1.27	-0.518
0.261	-1.38	1.13	0.86	0.434	1.59	-0.56	0.332	0.0842	-0.779	-0.874	-1.01	0.637	-0.212	-0.324	-0.669	-0.276	0.983	0.0613	-0.343	-0.471	-0.817	2.16	0.121	1.35	-0.952
0.672	-1.3	1.2	0.204	0.6	0.571	0.0302	1.93	-0.408	-1.03	0.921	-1.67	0.521	-0.799	-0.852	-0.684	-1.13	1.07	-0.681	-0.192	0.106	-0.694	1.93	0.262	0.946	-1.01
0.811	-0.886	0.906	0.712	0.0336	1.32	0.0715	0.975	-0.723	-0.778	-0.512	0.0991	0.649	-1.39	0.506	-0.951	-1.3	0.918	-0.0362	-0.197	-1.26	-1.08	1.73	0.533	0.662	-1.04
0.524	-0.159	0.775	0.551	0.317	1.42	-1.01	-0.142	0.098	0.0968	-1.18	0.728	0.778	-1.73	1.09	-0.964	-0.838	0.984	-0.169	-0.99	-0.484	-1.33	2	0.364	0.607	-0.744
0.0532	-0.509	0.816	0.505	-0.0356	1.05	-0.573	-0.309	0.58	-1.09	-0.457	-0.232	0.435	-1.01	1.19	-0.796	-1.44	0.682	0.344	-0.703	-0.395	-1.21	1.8	0.389	0.136	-0.693
0.0309	0.00148	1.32	0.263	0.521	1.05	-0.869	0.371	1.02	-1.23	-0.285	-0.487	0.753	-0.558	1.1	-0.923	-0.932	1.72	0.692	-0.644	-0.312	-1.04	1.41	0.515	0.421	-1.2
0.396	-0.696	1.38	0.0615	0.603	1.77	-1.09	0.729	0.851	-1.71	0.687	-0.0254	-0.203	0.223	0.498	-1.57	-1.09	2.13	0.216	-0.461	-0.0976	-0.819	0.902	0.46	0.0548	-1.2
0.46	-1.1	1.44	-0.0154	1.05	1.66	-0.302	-0.155	1.79	-0.976	0.845	0.163	-0.00279	0.35	0.477	-1.17	-0.931	2.6	-0.442	-1.15	-0.121	-1.08	1	0.149	0.0522	-0.72
0.276	-1.68	1.28	0.228	0.922	1.27	-0.558	0.838	1.3	-1.31	0.195	-0.00629	-0.0527	-0.239	0.412	-1.12	-1.39	2.45	1.21	-0.611	-0.478	-1.04	1.01	0.37	0.0787	-1.42
-0.101	-1.29	1.05	0.307	1	1.73	-1.1	-0.29	1.69	-2.58	-0.153	-0.65	0.0886	-0.633	0.747	-0.741	-1.78	1.65	-0.476	-0.698	-0.00378	-1.05	0.94	0.325	0.0531	-1.07
0.37	-2.12	0.978	0.255	0.651	0.926	-1.44	0.485	2.15	-1.94	-0.413	0.489	-0.0196	-1.22	0.557	-0.936	-1.59	1.23	0.00174	-1.12	0.191	-1.22	0.684	0.144	-0.108	-0.757
0.546	-1.63	1.08	0.175	0.619	1.11	0.221	-0.00392	2.02	-0.776	0.579	-1.04	0.441	-0.786	0.543	-0.957	-1.95	0.789	0.797	-0.951	-0.198	-1.04	1.29	-0.263	0.119	-0.925
0.518	-1.7	1.3	0.195	0.981	0.987	0.224	0.665	1.81	-1.16	-0.362	0.571	-0.193	-1.84	-0.00535	-0.667	-1.61	0.859	-0.223	-1.52	-0.462	-1.25	1.34	-0.314	0.0621	-1.29
0.66	-1.29	1.24	0.64	1.83	0.782	1.1	0.788	1.35	-1.45	-0.0471	0.383	0.396	-0.898	0.262	-0.823	-1.44	0.935	-1.05	-1.48	0.685	-1.17	1.14	-0.324	0.0794	-0.344
0.23	-1.33	1.41	0.469	1.12	0.904	-0.279	0.91	0.214	-1.45	-0.325	-0.658	0.255	-1.61	-0.28	-0.311	-1.28	1.23	-0.452	-1.16	-0.553	-0.997	1.41	-0.16	0.393	0.137
0.502	-1.13	1.63	-0.137	0.942	1.06	0.176	0.209	-0.246	-1.35	0.176	0.24	0.345	-0.837	-0.197	-0.332	-1.11	0.597	0.0276	-1.28	0.108	-0.8	2.41	-0.535	0.326	0.406
0.691	0.0657	1.35	0.266	0.656	-0.0569	-0.404	-0.439	-0.427	-1.03	0.274	-0.931	1.03	-1.15	-0.151	-0.306	-1	0.79	0.832	-1.16	0.188	-0.679	2.61	-0.26	0.175	0.000782
0.705	-1.64	1.1	-0.0973	0.784	-0.585	0.029	0.154	-0.495	-1.33	0.477	-0.38	1.08	-0.123	0.0729	-0.677	-1.63	1.15	0.687	-0.71	0.61	-0.849	2.36	-0.281	0.145	0.404
0.683	-1.94	1.03	-0.572	0.464	-0.365	-0.544	-0.138	-0.264	-1.7	-1.02	-1.71	0.41	-0.136	-0.182	-0.759	-1.82	1.3	0.304	-0.424	1.09	-0.971	2.24	-0.155	-0.0614	0.261
0.581	-1.1	1.17	-0.2	0.931	0.345	1.31	-0.232	-0.501	-2.48	-0.442	-0.262	0.398	-0.124	0.709	-0.182	-1.09	0.921	-0.47	-0.00881	0.849	-1.02	1.9	-0.397	0.126	-0.284
0.791	0.0727	1.09	-0.693	0.581	-0.163	0.368	0.246	-0.314	-1.31	1.18	-0.46	0.332	-0.206	0.909	-0.54	-1.66	1.5	0.0525	0.00773	-0.799	-1.27	1.53	-0.423	0.339	-0.742
0.755	-0.246	0.83	-0.926	0.0853	-0.49	-0.293	-0.466	0.333	-1.43	1.06	-0.357	0.04	-1.02	1.04	-0.402	-1.51	0.905	-0.98	0.0123	0.0649	-1.1	1.18	-0.213	0.866	-1.08
0.328	-0.852	0.635	-1.03	0.245	-1.2	0.318	-0.17	0.0348	-1.95	-0.199	-0.388	-0.904	-1.38	0.779	-0.417	-1.45	1.27	-0.857	0.106	1	-0.726	1.41	-0.336	1.01	-0.732
0.393	0.0696	0.602	-1.3	0.0491	-2.07	0.521	-1.33	0.687	-2.29	-1.87	-1.06	0.621	-0.624	1.16	-0.568	-1.09	0.57	-0.323	-0.336	0.0844	-1.05	1.53	-0.233	0.893	-0.514
0.705	-0.626	0.725	-1.33	-0.144	-0.928	0.0362	-0.769	0.849	-2.41	0.465	1.02	-0.0917	-0.519	1.79	-0.811	-1.14	0.852	0.145	-0.243	-0.422	-1.09	1.32	-0.461	0.922	-0.968
0.246	-0.566	0.728	-0.322	0.0158	-1.36	0.524	0.471	0.544	-1.14	1.26	-0.319	-0.368	0.671	2.1	-0.61	-0.631	1.25	-0.000415	-0.113	-1.79	-0.765	0.972	-0.526	0.983	-1.51
0.931	-0.273	0.874	-0.566	-1.03	-1.13	0.185	0.198	1.31	-1.75	-0.0163	-1.17	-0.563	0.0953	1.78	-0.859	-0.888	1.57	-0.44	-0.191	-1.1	-0.82	1.23	-0.337	0.661	-1.29
0.426	-0.958	0.881	-0.552	-0.499	-0.438	-0.359	-0.158	0.856	-2.07	1.04	-1.74	-0.79	0.379	1.83	-1.24	-1.34	1.9	0.126	-0.306	-2.51	-1.14	1.16	-0.424	0.571	-0.541
0.261	-0.343	0.849	-0.681	0.84	-0.456	0.22	0.564	0.478	-1.96	2.14	-0.968	-0.443	-0.873	1.7	-1.46	-1.15	1.51	-0.663	-0.29	-1.92	-1.3	1.59	-0.906	0.638	-1.2
0.17	-0.504	0.371	-0.351	1.23	-0.321	0.332	1.19	0.493	-0.834	0.218	-1.4	-0.113	0.322	1.67	-0.944	-0.956	1.59	-0.605	-0.335	-1.11	-1.39	1.27	-0.895	0.44	-0.64
0.17	-0.759	0.545	-1.34	1.18	0.284	-0.248	0.671	-0.388	-0.637	0.521	0.238	0.533	0.365	1.86	-0.498	-1.49	1.49	-0.173	-0.975	-1.12	-1.13	1.46	-0.497	0.573	-1.15
0.3	-0.727	0.576	-0.676	0.666	-0.764	-0.484	0.709	-0.314	-0.473	-1.67	-0.769	0.526	0.196	1.44	0.512	-1.49	1.5	-0.514	-0.646	-1.03	-1.12	1.38	-0.14	0.164	-1.64
0.334	-1.27	0.443	-0.656	0.757	-0.82	0.607	0.132	-0.18	-1.2	-0.568	-0.503	0.401	-0.356	1.91	-0.334	-0.571	1.15	-0.6	-1.04	-1.28	-1.11	1.1	0.108	0.0887	-1.53
0.438	-0.684	0.78	-0.813	1.7	-0.944	0.851	-0.094	-0.229	-1.27	1.48	-0.478	0.898	-1.11	1.45	0.187	-0.419	1.26	-0.645	-0.199	-0.903	-0.988	0.959	0.327	0.108	-1.19
0.921	-0.517	1.03	-0.642	1.42	-1.29	0.106	-0.265	0.106	-1.06	0.989	0.281	0.277	-0.308	1.71	-0.165	-0.653	0.918	-0.0498	-0.984	0.421	-0.919	1.04	0.537	0.167	-0.91
0.949	-0.102	0.59	-0.583	0.427	-1.08	0.199	-0.134	0.372	-1.54	0.24	-0.919	-0.421	-0.0707	1.3	-0.0306	-1.16	0.825	-0.679	-0.88	0.506	0.439	0.937	0.481	0.43	-0.42
0.798	-0.756	0.707	-0.638	0.61	-1.03	0.308	0.622	0.498	-1.78	0.227	-0.484	-0.424	-0.119	0.968	-0.353	-0.565	1.05	-0.314	-0.423	1.48	1.24	1.09	0.379	0.232	-0.413
0.495	-0.782	0.629	-0.0347	0.384	-0.976	1.38	0.196	0.275	-1.75	0.422	-1.04	-0.27	-0.119	1.15	0.0984	-0.888	1.22	-0.0814	-0.393	0.945	1.21	1.13	-0.041	0.352	1.55
0.898	-1.2	0.867	1.55	0.0382	-1.45	1.39	0.237	0.014	-2.16	-0.664	-1.06	-0.47	0.121	1.01	0.0112	-0.691	0.876	-0.0164	0.784	1.74	1.09	1.15	0.493	0.31	-1.93
0.663	-0.791	0.745	1.37	0.0597	-1.27	0.873	0.484	0.537	-1.6	0.813	-0.695	-0.493	-1.41	0.633	-0.535	-1.09	1.16	-0.791	2.75	0.433	1.36	0.825	0.0913	0.314	-1.93
0.0283	-1.22	0.87	1.3	-0.0613	-1.5	0.281	-0.282	0.205	-1.87	2.12	-1.71	-0.631	-0.693	0.857	-0.471	-0.869	0.954	-0.153	2.93	-0.161	1.38	0.53	0.307	0.227	-1.84
0.274	-1.23	0.77	0.746	0.159	-1.9	-0.843	1.13	-0.0527	-0.749	1.81	-1.35	-0.314	0.268	0.684	-0.736	-0.93	1.77	-1.01	2.99	1.75	1.53	0.368	0.163	0.281	-0.554
0.715	-0.0185	0.57	0.637	0.872	-0.472	-0.0781	1.14	0.564	-1.33	1.22	-1.11	-0.163	0.844	0.354	-0.607	-0.37	2.26	-0.688	2.7	1.93	1.59	0.575	0.0693	0.372	-0.851
0.524	-0.523	0.342	-0.134	0.408	0.395	-0.175	1.1	0.191	-0.495	1.46	-0.561	-0.277	0.336	0.56	-0.503	-0.529	2.57	-0.561	2.39	1.9	1.19	0.438	0.0511	0.175	-1.17
0.951	0.331	0.453	-0.083	0.803	0.754	0.736	1.8	0.251	0.453	0.437	-0.211	-0.234	0.674	0.815	0.232	-1.34	2.4	-0.63	2.43	1.75	1.2	0.701	-0.0579	0.404	-1.87
0.973	-0.848	0.639	-0.577	0.246	0.844	-0.57	0.78	0.578	-0.425	-0.21	0.0574	-0.705	0.832	0.665	0.656	-1.16	1.97	-1.77	2.19	1.81	1.12	0.602	0.143	0.00219	-1.14
0.858	-1.49	0.498	-0.482	0.325	0.981	-0.307	0.567	0.87	-0.363	1.01	0.291	0.306	-0.309	0.495	0.836	-0.563	1.44	-0.99	1.68	2.02	1.32	0.33	0.275	0.0411	-1.26
0.794	-1.4	0.53	-1.01	0.201	0.112	0.52	0.971	0.933	-0.21	1.41	-0.83	-0.62	-1.18	0.247	0.568	-0.849	2	-0.999	1.41	1.06	1.09	0.478	-0.0406	0.122	-0.609
0.316	-1.38	0.338	-0.767	0.128	-0.123	0.97	1.23	0.883	-0.0666	1.88	-1.8	0.0794	-1.26	-0.338	0.186	-0.78	1.47	-0.398	0.901	0.944	0.975	0.74	0.261	-0.275	-1.64
0.873	-1.72	0.42	-0.781	0.0709	0.174	1.24	0.00996	0.955	0.881	0.136	-0.894	-0.0932	0.153	-0.183	-0.172	-0.21	1.23	-1.31	1.27	1.92	1.12	0.446	0.13	0.103	-0.284
0.467	-1.24	0.567	-0.0461	-0.344	0.0995	1.28	0.376	1.06	0.554	0.384	-0.047	-0.528	-0.711	-0.264	0.0244	-1.24	0.819	-0.861	1.02	1.61	0.913	0.345	0.0615	0.239	-1.43
0.736	-0.924	0.644	-0.234	-0.488	0.964	0.825	1.38	1.22	-0.308	-0.756	-2.4	-0.376	-0.821	-0.567	-0.0893	-1.83	0.356	0.841	1.5	1.37	0.706	0.564	-0.242	0.131	-1.26
0.766	-0.605	0.855	-0.0516	-0.992	0.96	0.605	1.42	1.05	-0.94	-0.129	-1.65	-0.663	-0.752	-0.2	0.0192	-1.05	0.564	0.0957	1.23	1.07	1.18	1.09	0.0846	-0.0935	-1.54
0.563	-0.253	1.09	-0.115	-0.737	0.361	1.07	0.264	0.588	0.656	-0.147	-0.419	-1.15	-1.32	-0.294	-0.0895	-1.38	0.285	-0.686	1.77	1.56	2.75	1.75	0.0722	-0.474	-0.497
0.955	-0.637	1.09	0.144	-0.174	0.341	1.13	0.14	0.655	1.16	-0.471	0.233	0.412	-1.64	0.195	-0.0966	-1.94	0.727	-0.0175	1.34	0.283	3.05	1.78	0.23	-0.532	-0.589
1.81	-1.59	1.09	0.697	1.04	0.801	0.178	0.328	0.722	0.112	0.503	-1.08	-0.619	-1.65	-0.363	-1.01	-1.48	0.676	0.516	1.26	0.147	3.1	1.29	0.0457	-0.47	-0.883
3.37	-1.01	0.57	0.0806	1.48	0.0593	0.367	0.246	0.557	1.35	0.146	-1.1	-0.17	0.204	0.268	-1	-0.986	1.18	0.44	0.775	-0.171	3.17	1.32	-0.0097	-0.331	-0.638
3.41	-1.07	0.992	-0.435	1.15	-0.561	0.771	1.23	1.15	-0.156	0.412	0.654	-0.567	0.267	0.0884	0.0271	-1.73	1.07	0.63	0.568	0.182	3.38	1.08	0.186	-0.389	-0.784
2.9	-1.46	0.532	0.0823	0.363	0.294	1.01	0.264	1.36	0.994	0.105	-1.18	-1.45	0.312	0.242	-0.16	-1.79	0.788	-0.651	0.358	-1.23	3.31	1.08	-0.126	-0.309	-0.641
3.14	-0.918	0.804	0.399	-0.366	-0.338	0.98	-0.591	1.91	0.234	0.496	-1.98	-0.667	0.78	0.234	0.262	-1.31	0.971	0.61	0.539	-0.313	3.06	1.04	-0.229	0.384	-1.09
2.98	-0.26	0.536	1.21	-0.0716	-0.274	1.05	-0.608	2.01	0.429	-0.198	-1.49	-0.809	0.288	0.261	0.97	-1.02	1.13	0.39	1.34	-0.343	3.12	0.877	-0.286	-0.0424	-1.19
1.89	-0.801	0.922	1.62	-0.211	-0.297	0.464	-0.548	2.41	1.2	0.57	-1.23	-0.68	1.24	0.204	1.49	-1.36	1.31	0.507	1.21	-0.448	3.06	0.921	-0.348	-0.201	-0.804
1.59	0.182	0.989	1.72	-0.00237	-0.66	0.503	-1.34	2.34	-0.141	0.833	0.161	-0.536	0.388	0.473	2	-1.9	1.41	0.271	1.41	-0.35	3.5	0.668	-0.215	-0.0196	-0.736
1.43	-0.515	1.24	1.04	-0.348	-1.18	0.283	-0.926	2.01	1.03	1.8	-0.689	-1.08	-0.379	-0.0831	2.23	-1.42	1.38	-1.11	1.05	1.13	3.37	0.53	-0.0864	0.343	-0.796
0.715	0.323	1.23	0.904	0.339	-0.646	1.5	0.452	1.2	1.28	0.674	-0.521	-1.51	0.0465	0.158	1.59	-1.92	0.502	-1.17	1.27	0.956	3.34	0.0982	-0.269	0.0355	-0.678
0.809	-0.313	1.07	1.05	0.641	0.122	0.785	-0.965	1.31	1.81	0.838	-0.289	-1.02	0.145	0.0144	1.8	-0.85	0.859	-0.801	2.54	0.652	3.23	0.466	-0.583	0.408	-0.867
1.66	-0.759	1.2	1.01	0.448	0.792	-0.00455	0.335	0.787	1.76	1.33	1.07	-1.64	0.464	0.197	2.1	-0.819	0.972	-0.355	2.57	1.15	3.22	0.736	-0.405	0.219	-0.705
0.617	-0.252	1.32	0.911	0.394	1.58	0.78	1.15	0.96	0.00934	-0.554	-0.0379	-0.463	1.19	0.216	1.88	-1.33	1.23	-0.506	1.94	1.1	2.88	0.955	-0.482	0.576	-1.16
0.791	-0.699	1.3	0.728	0.569	0.544	0.955	1.16	0.664	0.249	-1.8	-0.577	-1.12	1.96	0.206	1.62	-1.56	0.974	-0.386	1.97	1.38	3.09	0.733	-0.597	0.361	-0.688
1.3	-1.31	1.16	0.811	1.32	0.618	1.03	1.82	0.532	1.03	-0.618	-2.38	-1.08	1.13	-0.105	1.22	-0.147	0.876	-0.17	1.64	1.4	3.1	0.689	-0.751	0.254	-0.356
1.01	-1.06	1.06	0.911	0.685	0.177	0.937	-0.0206	0.685	1.28	-0.155	-1.4	-1.24	0.916	-0.262	0.554	-0.577	1.07	1.07	1.29	2.07	2.82	0.35	-0.643	-0.255	-0.337
0.606	-1.33	1.35	1.63	0.747	0.18	0.552	0.596	0.413	0.0119	0.308	-1.19	-1.87	0.941	-0.202	0.451	-1.46	0.944	0.0312	1.43	1.83	2.8	0.643	-0.52	-0.0446	-0.189
0.713	0.131	1.31	1.39	0.62	-0.291	0.551	1.34	0.895	0.445	0.818	-0.769	-0.866	-0.328	-0.417	0.863	-1.48	1.13	0.58	1.42	1.87	2.82	0.823	-0.391	0.0837	-0.458
0.26	-0.649	1.4	0.604	0.666	-0.727	1.04	-0.549	1.01	0.906	0.127	-0.869	-1.42	0.185	0.259	0.54	-1.07	0.886	-0.175	1.22	0.781	2.42	0.78	-0.539	0.521	-1.46
0.634	0.442	1.32	0.0536	0.116	-1.1	1.57	-0.297	0.865	0.423	-0.536	-2.24	-1.49	0.185	0.386	-0.553	-1.55	1.31	0.115	0.84	0.862	2.58	0.975	-0.482	0.0669	0.0418
1.02	-0.136	1.26	0.849	0.633	-0.754	1.42	-0.479	0.0914	1.74	-0.854	-1.15	-1.63	0.0358	0.278	-0.772	-0.482	1.76	-0.352	0.606	0.747	2.26	0.418	-0.406	-0.211	-0.51
0.92	0.145	1.43	1.13	0.611	-1.41	1.75	0.162	0.51	1.11	0.717	-1.39	-1	-0.196	0.373	-0.686	-0.55	1.76	0.259	1.01	1.8	2.3	0.452	-0.299	0.019	0.342
0.643	-0.674	1.03	0.914	-0.000661	-0.755	1.37	0.162	1.26	0.37	-0.976	-2.16	-0.678	-0.942	-0.0413	-0.298	-0.907	1.85	-0.0419	0.762	1.03	2.51	0.428	-0.518	-0.285	-0.578
0.56	-0.879	1.21	1.01	0.339	-0.493	0.839	-1.07	1.56	1.47	-0.188	-1.08	-0.652	-0.872	0.301	-0.595	-1.41	1.62	-0.586	0.944	1.55	2.36	0.316	-0.458	-0.109	0.184
0.832	1.1	0.941	0.868	0.477	-0.412	0.47	-0.77	1.54	1.62	1.75	0.37	-0.82	-0.642	-0.0987	-0.207	-0.963	2.08	0.37	0.776	1.02	2.23	0.421	0.28	-0.443	-0.27
0.688	-0.426	0.675	0.611	-0.288	-0.926	0.709	0.0599	0.926	1.29	1.14	-1.05	-1.19	-0.617	0.483	0.356	-2	1.65	0.323	0.724	1.09	2.08	0.647	1.53	-0.3	-0.131
0.246	-0.719	0.753	0.85	-0.597	-1.14	0.981	0.107	1.41	1.6	0.251	-1.39	-1.13	-0.00206	-0.241	0.403	-1.64	2.06	-0.029	1.02	0.493	1.96	0.785	2.16	-0.333	-0.731
0.284	-0.754	0.86	0.451	-0.813	-2.41	0.934	-0.914	1.65	2.23	0.234	-1.78	-0.884	0.343	-0.593	0.971	-1.19	2.24	-0.153	0.858	2.06	2.03	0.646	2.14	0.324	-0.626
0.0434	-0.686	0.936	0.42	-0.644	-2.72	1.37	0.574	1	0.8	1.36	-1.2	-0.713	0.00646	-0.718	0.687	-1.59	2.71	-0.147	1.19	0.29	2.12	0.56	2.21	0.211	0.0239
0.0117	-0.775	1.01	0.891	-0.283	-1.93	0.0868	1.05	1.23	1.55	0.0204	-2.04	-0.451	-0.049	-1.04	0.628	-0.982	2.67	-0.705	1.27	-0.907	1.94	0.5	1.75	0.122	-0.305
-0.558	-0.209	1.07	1.13	0.201	-0.544	1	-0.974	0.392	1.31	-0.304	-1.65	-0.955	-0.389	-1.01	0.801	-1.29	2.52	-0.761	1.2	-1.19	1.78	-0.0304	1.85	0.185	-0.442
-0.881	-0.071	0.96	1.04	0.334	-0.343	0.558	0.0404	0.725	1.29	-0.657	-1.92	0.0209	-0.831	-0.141	0.38	-0.82	2.74	-0.568	0.0889	-0.837	1.5	-0.253	2.41	-0.0746	-1.05
-0.375	-0.24	1.13	1.05	0.117	-0.669	1.29	-0.217	0.0298	-0.332	-0.407	-1.53	0.0143	-1.38	0.201	0.956	-0.889	1.73	0.348	0.722	-0.407	1.82	-0.312	2.35	-0.0531	-0.468
0.41	0.268	1.45	0.601	0.0288	-1.28	1.9	-2.16	-0.515	-0.486	0.502	-1.43	0.529	-1.16	0.488	0.644	-1	1.95	-0.00636	0.799	-0.264	1.49	-0.227	2.41	-0.14	-0.405
0.211	0.161	1.52	0.697	-0.0947	-1.84	0.582	-1.85	-0.0986	-1.31	0.1	-1.76	0.316	-0.888	0.0608	1.37	-0.616	1.93	-0.532	0.269	0.316	1.39	0.0933	1.81	0.318	0.219
-0.0977	-0.00072	1.45	1.28	-0.284	-2.32	0.381	-1.26	-0.403	-0.034	-0.161	-0.584	-0.343	-0.995	0.565	1.56	-0.981	2.05	-0.633	0.34	0.75	1.15	0.779	1.54	0.818	0.283
-0.0835	-0.309	1.23	0.209	-0.639	-2.18	-0.588	-0.278	-0.571	-0.0101	-0.0917	-2.42	-0.673	-0.622	0.314	1.82	-0.929	2.32	-0.215	0.694	1.16	1.02	1.96	1.66	0.986	1.28
0.44	1.24	1.1	0.327	-0.662	-1.78	0.769	-0.379	-0.492	0.0605	-1.55	-1.12	-1.01	-1.53	0.44	1.5	-0.704	1.64	0.0716	1.17	0.879	1.02	2.52	1.43	0.498	0.853
0.0349	-0.138	1.14	0.876	-1.09	-1.15	0.27	-0.146	-0.458	0.236	-0.434	0.044	-0.828	-0.949	0.686	1.06	-0.391	1.84	-0.803	0.766	0.69	1.51	2.46	1.64	0.0665	1.6
-0.589	0.0509	0.978	1.02	-0.859	-0.318	0.372	0.0744	-0.22	-0.0749	-0.185	-0.442	-1.05	0.129	0.804	0.841	-0.349	1.22	-0.833	0.983	0.108	1.24	2.56	1.3	0.383	1.17
-1.09	-0.314	1.19	0.433	-0.691	-1.04	-0.555	0.175	-0.11	-0.228	0.994	-0.354	-0.977	0.0875	0.599	0.751	-0.287	1.57	-0.267	0.727	-0.546	1.28	2.48	1.4	0.272	-0.0688
-0.0267	0.493	0.761	0.761	-0.73	-1.4	0.0375	0.101	-0.232	0.793	1.87	-0.545	-1.53	0.123	0.931	0.387	-0.917	2.29	0.509	0.784	-0.29	1.03	2	1.35	0.134	0.255
0.268	0.287	0.914	1.11	-0.871	-1.33	-0.531	1.1	-0.646	-0.0408	1.36	-0.232	-1.24	-0.623	0.549	0.321	-0.858	1.94	0.277	0.492	-0.218	0.517	1.84	1.18	0.316	-0.258
0.484	0.0404	0.928	1.2	1.3	0.226	-0.779	0.517	0.183	-0.885	1.17	-1.02	0.0992	-0.439	0.647	0.211	-0.867	0.949	-0.196	0.528	-1.43	0.977	1.8	1.37	0.165	-0.011
-0.215	0.682	0.816	0.795	2.27	0.416	-0.761	0.285	-0.408	-0.862	0.735	-0.969	0.947	-0.172	0.491	0.267	-0.584	0.714	0.768	0.159	0.816	1.28	1.64	1.02	0.13	-0.328
-0.446	0.233	0.673	0.652	1.95	0.04	0.0673	-0.502	-0.514	0.427	0.302	-0.748	2.15	1.15	0.107	0.211	-1.13	0.863	0.478	-0.0417	1.96	1.11	1.33	1.4	-0.11	0.256
0.133	0.54	0.262	0.961	2.5	0.366	-0.983	-0.574	-0.919	-0.579	0.0737	-0.915	1.81	0.496	0.2	0.758	-0.555	0.745	-1.26	0.454	2.48	0.621	1.44	1.23	-0.011	0.0933
-0.0545	0.388	0.235	0.0224	2.15	0.285	0.158	-0.26	-0.826	-0.255	0.992	-0.94	0.11	0.816	0.264	-0.0686	-0.694	0.406	-1.48	0.405	1.51	0.556	1.11	1.14	0.338	-0.0414
-0.159	0.191	0.0839	0.22	1.76	0.61	-0.323	-1.3	-0.443	0.77	-0.334	-1.19	-0.216	0.645	1.02	-0.0733	-1.73	-0.087	-0.112	0.816	0.195	0.665	1.59	1.24	0.312	-0.0405
0.0763	-0.857	0.0594	-0.345	0.838	-0.894	-0.713	-0.701	0.648	0.275	-0.858	-0.681	-0.512	0.233	1.54	-0.0932	-0.463	-0.24	-0.412	0.718	-1.57	0.551	1.53	0.994	0.72	0.197
0.262	-1.04	-0.298	-0.686	1.27	-0.0323	-0.211	-0.563	0.436	1.01	0.966	-1.19	0.0387	-0.589	1.24	-0.104	-0.607	0.193	-0.486	0.641	-1.11	0.384	1.47	0.898	0.327	0.536
0.115	-1.79	-0.126	-0.786	1.18	0.535	-0.523	1.77	0.196	0.952	-0.247	0.269	0.087	-0.771	1.14	0.68	-0.341	0.513	-0.768	0.839	0.0191	0.321	1.32	1.16	0.727	1.53
0.177	-1.34	-0.0436	-1.31	0.793	0.0864	-0.925	0.645	0.446	0.313	-0.71	-0.00714	0.022	-0.409	1.2	0.683	-0.396	0.638	-0.936	1.36	0.462	0.332	1.54	0.958	-0.076	1.58
-0.337	0.0781	-0.302	-0.862	0.707	-0.177	-0.567	0.704	0.739	0.939	-0.438	-0.77	-0.611	0.853	1.12	0.914	0.147	1.16	-0.745	0.833	0.218	0.315	1.53	0.906	0.019	1.42
-0.712	-0.676	-0.235	-0.529	1.44	0.0741	-0.675	0.789	0.607	0.383	0.536	0.134	-0.0854	1.06	1.23	2.21	-0.0824	0.67	-0.253	0.86	0.507	0.498	1.21	0.472	0.0073	1.09
-0.766	-1.01	-0.335	-0.507	2.78	-0.136	-0.689	0.539	0.857	0.566	-0.555	-0.404	-0.362	1.09	0.501	2.7	-0.559	0.879	-1.21	1.69	1.62	0.81	1.02	0.67	-0.0875	1.06
-0.65	-0.652	-0.314	-0.213	3.74	-0.0852	-1.83	2.27	1.09	0.363	1.13	-0.596	-0.404	0.594	0.898	2.3	-0.581	0.9	-0.46	2.34	-0.0869	0.742	1.22	0.737	-0.183	0.779
-0.0502	0.156	-0.391	-0.579	3.29	-0.18	-1.32	1.46	0.965	0.461	0.0335	-1.79	-0.449	0.727	0.792	1.99	-0.965	0.504	0.0824	2.6	-0.503	0.654	1.44	0.662	-0.275	1.13
-0.494	-0.294	-0.242	-0.651	2.56	-0.157	0.328	1.37	0.518	-0.972	0.327	-1.29	0.199	-0.466	1.32	1.71	-0.287	0.541	0.146	2.41	-0.279	-0.0979	1.53	0.389	-0.0421	1.02
-0.557	-1.16	-0.473	-0.848	2.63	0.392	-0.465	0.507	0.99	-0.658	-0.633	-2.1	0.373	0.72	0.883	1.28	-0.47	0.449	-0.372	2.17	0.578	-0.0518	1.37	0.385	-0.128	1.13
-0.651	-0.782	-0.684	-1.67	2.02	-0.0654	-0.323	1.67	0.477	-1.56	0.55	-0.371	-0.0137	0.383	0.956	1.06	-0.0934	0.484	0.477	2.24	0.79	0.0434	1.35	0.23	-0.336	0.87
-1.24	-0.47	-0.588	-1.67	1.92	0.444	-0.177	0.0651	0.256	0.603	0.0361	-0.317	-0.465	-0.045	0.865	0.711	-0.495	0.37	0.619	2.05	0.58	0.114	1.29	0.583	-0.328	0.673
-1.63	-0.599	-0.226	-1.39	1.76	0.382	-0.993	0.374	-0.0814	2.69	-0.775	-0.0897	-0.929	1.46	0.856	0.681	-0.735	1.01	-0.715	1.72	0.759	0.0844	1.13	0.59	-0.431	0.3
-1.73	0.111	-0.76	-1.53	1.77	0.456	-1.36	-0.658	0.0269	1.88	-0.456	-1.98	-0.765	1.08	0.489	0.531	-0.764	0.986	-0.368	1.15	-0.14	0.129	0.638	0.556	-0.295	0.494
-1.39	0.0268	-0.818	-1.73	2.13	0.743	-1.59	-0.744	-0.065	-0.279	0.767	-0.616	-1.17	0.853	0.738	1.1	-0.486	0.421	-0.441	0.831	0.22	0.241	0.632	0.46	-0.521	0.129
-1.65	-0.62	-1.05	-1.19	2.34	0.947	-1.27	0.266	0.512	0.774	0.973	-0.598	-0.791	0.00363	0.333	1.13	-1.29	0.542	-0.13	0.867	-0.429	0.41	0.986	0.598	-0.619	-0.0381
-1.71	-0.509	-0.961	-0.243	2.02	0.742	-1.29	-0.269	1.09	0.102	-1.48	0.544	-0.105	-0.618	0.599	0.674	0.0501	0.748	0.369	0.475	0.0631	0.13	0.854	0.23	-0.849	0.366
-1.89	-0.986	-1.02	-0.232	1.57	1.01	-1.1	-0.271	0.694	0.664	1.52	-0.048	-1.04	0.0445	0.486	0.994	-0.436	0.413	0.103	0.308	0.825	0.239	0.895	0.0386	-0.672	-0.0841
-1.66	-0.497	-0.548	0.223	1.53	0.128	-0.872	-0.842	0.716	0.178	0.11	-1.65	-0.809	1.38	0.256	1.09	-0.573	0.411	1.02	0.685	1.4	-0.204	1.21	0.0518	-0.873	-0.531
-1.64	0.179	-1.01	0.47	1.73	-1.1	-1	0.024	0.192	0.323	-0.831	-0.989	-2.21	2.7	0.418	1.07	-0.273	0.147	-0.362	0.321	0.276	0.232	1.26	0.46	-0.724	-0.988
-1.8	-0.2	-0.743	0.142	1.81	-0.26	-0.949	1.48	0.22	0.312	-0.215	-0.779	-1.45	3.25	0.175	0.969	-0.32	0.624	0.705	0.527	-0.688	-0.132	1.19	0.219	-0.322	-0.0383
-1.26	-0.00388	-0.924	0.677	1.58	-0.302	-0.554	-0.726	-0.118	-0.198	0.119	1.1	-1.68	2.88	-0.26	1.19	-0.248	0.742	0.0625	0.0164	-1.31	0.0653	1.28	0.632	-0.695	0.694
-1.85	-0.425	-0.449	0.335	1.35	0.264	-0.778	-0.0318	0.995	-0.0958	0.581	-1.58	-1.05	2.03	-0.316	0.611	-0.0447	0.805	0.431	0.389	-1.59	0.0273	1.04	1.12	-0.482	-0.117
-2.57	-0.836	-0.967	0.046	1.3	-0.313	-0.382	-0.743	0.236	-1.47	0.634	-0.913	-0.922	1.36	-0.129	0.839	0.476	0.174	1.27	0.295	-0.148	0.171	1.1	0.836	-0.551	0.025
-2.68	0.0711	-0.897	-0.0246	0.94	-0.0299	-0.00279	-0.612	0.565	-0.349	0.834	0.702	-1.3	2.05	-0.44	1.25	0.0856	0.276	0.301	0.156	0.537	0.392	0.96	0.612	-0.503	0.0853
-1.41	-0.0655	-1.15	-0.374	0.631	-0.579	-0.761	-0.717	0.495	0.442	0.625	0.919	-1.06	2.14	-0.239	1.04	-0.51	0.323	0.395	-0.471	0.085	0.0735	1.14	0.41	-0.63	-0.655
-0.435	1.64	-1.07	-0.557	0.853	-0.695	-1.81	-0.128	1.2	-0.641	1.14	0.314	-1.12	2.13	-0.435	0.535	-0.618	-0.167	0.0741	-0.841	-1.29	0.178	0.82	0.319	-0.445	-0.243
-0.324	0.719	-1.3	-0.595	0.743	-0.853	-2.03	-0.983	0.958	0.773	1.9	0.764	-1.1	1.63	-0.591	0.564	-0.516	-0.322	0.532	-0.325	-1.66	0.1	0.908	0.187	-0.908	0.448
-0.86	0.795	-1.07	-0.544	0.654	-0.199	-1.35	0.331	0.709	0.332	0.394	0.232	-0.911	0.121	-0.129	0.862	-1.08	-0.81	-0.0322	-0.189	-1.12	0.134	1.55	0.187	-0.595	1.04
-0.865	0.531	-1.06	-0.434	1.63	0.554	-1.5	-1.16	1.01	0.482	-0.507	0.904	-0.851	0.285	0.34	0.489	-0.681	-0.5	0.256	-0.211	-1.63	-0.14	2.19	0.228	-0.786	1.09
-0.53	-0.509	-0.799	-0.413	1.47	0.345	-1.08	-0.264	0.765	-0.482	-0.713	-0.217	-0.267	0.106	0.284	0.354	-0.677	0.466	-0.417	0.188	-2.04	-0.0431	2.04	-0.0605	-0.723	1.24
-0.604	-1.73	-0.597	-0.137	0.843	0.13	-0.691	-0.671	0.379	-0.577	-0.496	0.295	-0.364	0.875	0.153	-0.353	-0.669	0.1	-0.487	-0.0438	-1.54	-0.0384	1.5	-0.0118	-0.735	1.06
-0.507	-0.428	-0.814	-0.409	0.659	-0.167	-0.462	-1.14	0.387	-0.402	1.28	0.16	-0.641	1.51	-0.105	-0.438	0.281	0.202	0.0396	-0.00849	-1.55	-0.117	1.51	-0.321	-0.705	0.395
-0.744	0.345	-1.05	-0.446	1.08	0.238	-1.43	-0.122	0.684	-1.02	1.01	-0.0053	-0.506	1.2	-0.361	-0.511	1.58	-0.0519	-0.654	0.261	-0.689	-0.262	1.47	0.0909	-0.874	-0.231
-0.52	1.49	-0.853	-0.284	1.02	-0.253	-1.73	0.798	0.115	-0.278	0.728	-0.237	-0.923	1.77	-0.0831	-0.747	0.868	-0.373	-0.32	-0.0213	-0.613	-0.282	1.38	0.362	-0.933	0.52
-0.646	0.944	-1.02	-0.881	0.88	-0.345	-1.14	0.349	0.278	-0.979	0.154	-0.397	-0.281	0.365	-0.168	-0.432	0.597	-0.627	0.524	0.0282	-0.705	-0.378	1.38	0.329	-1.26	0.718
-0.821	0.0462	-1.19	-1.02	1.05	-0.506	-0.838	-0.855	0.633	-0.578	-0.161	-0.322	0.105	-0.126	-0.451	-0.659	-0.134	-0.587	-0.281	0.224	-1.33	-0.506	1.15	0.631	-1.05	0.808
-1.04	0.691	-1.28	-0.831	1.43	-0.708	0.306	-0.292	0.761	-0.817	-0.695	0.259	-0.169	0.152	-0.138	-0.339	0.993	-0.636	0.92	-0.482	-1.2	-0.381	1.01	0.682	-1.19	0.672
-1.19	0.788	-1.32	-0.692	0.977	-1.11	-0.596	0.177	0.426	-1.33	-0.316	0.677	0.323	0.0755	-0.303	-0.628	0.373	-0.43	0.869	-0.651	-0.141	-0.134	0.863	0.451	-0.781	-0.00812
-1.07	0.231	-0.793	-0.245	0.778	-0.567	-1.37	-0.722	0.278	-1.99	-0.687	1.35	0.34	0.0594	-0.402	-0.16	-0.218	0.356	0.506	-0.247	-0.351	-0.154	0.584	0.188	-0.903	-0.408
-1.03	0.292	-1.12	0.0708	0.28	-1.16	-1.87	1.86	0.362	-1.44	0.00646	0.525	-0.294	0.672	-0.846	-0.357	0.356	0.0283	1.15	-0.556	-0.453	-0.18	0.64	0.171	-0.939	-0.627
-1.05	0.944	-1.4	0.435	0.463	-0.715	-1.12	0.53	-0.358	-1.25	0.269	-0.737	-0.271	-0.121	-0.314	-0.29	0.83	-0.109	1.34	0.0202	-1.44	-0.201	0.813	0.317	-1.04	0.191
-1.03	0.953	-1.25	0.565	0.64	-0.728	-0.94	0.608	0.071	-0.9	-0.49	-0.332	0.0305	-0.313	-0.422	-0.506	0.905	0.311	1.18	-0.58	-0.438	0.159	0.754	0.0924	-1.16	-0.143
-0.732	0.929	-0.804	1.28	0.408	-0.902	-1.19	0.883	-0.502	0.216	0.0852	0.233	-0.109	0.523	0.0537	-0.85	0.246	-0.227	2	-0.843	-1.99	0.162	0.805	0.193	-1.17	-0.456
-0.813	0.0563	-0.811	0.889	0.334	-1.67	-0.631	0.323	0.315	-0.0766	-0.0631	0.141	-0.0326	0.427	-0.302	-0.836	0.426	-0.202	0.468	-0.305	-0.809	0.316	0.895	-0.0056	-1.11	0.00136
-0.667	-0.884	-0.551	1.22	0.17	-0.975	-1.17	0.3	0.285	-1.72	0.884	1.02	0.235	0.846	-0.184	-0.751	-0.258	-0.547	0.156	1.59	-0.988	0.271	0.862	-0.0523	-1.49	-0.786
-0.686	0.181	-0.595	0.949	0.596	-1.05	-0.473	2.22	0.633	-0.787	0.801	1.36	0.0819	0.877	-0.0977	-0.282	1.4	-0.286	0.268	2.44	-1.26	-0.0621	0.891	-0.0217	-1.23	-0.447
-1.05	-0.45	-0.684	1.26	-0.352	-0.859	-0.972	1.18	0.925	-1.4	0.512	1.5	-0.303	1.24	-0.493	-0.403	2.82	0.19	1.28	2.26	-0.78	0.0548	0.702	-0.0628	-1.24	-0.303
-1.42	-0.591	-1.21	1.21	-0.677	-1.09	-1.48	0.322	0.56	-1.18	0.446	1.66	-0.694	1.17	-1.03	-0.158	1.87	-0.376	-0.206	1.83	-0.766	0.123	0.528	0.0941	-1.39	-0.3
-1.63	-0.315	-0.952	0.663	-1.17	-1.26	-0.392	1.15	0.981	-0.575	1.36	0.901	-1.46	0.871	-0.931	-0.254	2.45	0.0998	0.119	1.82	-1.29	-0.319	0.363	-0.112	-1.24	1.18
-1.47	-1.05	-1.05	0.387	-0.72	-1.15	-0.86	1	1.53	-1.59	0.603	0.106	-1.3	1.19	-0.804	-0.765	1.88	-0.00732	0.161	0.74	-0.97	-0.625	0.114	-0.152	-0.942	1.54
-1.38	-0.516	-0.559	0.666	-0.322	-1.59	0.29	0.5	0.539	-0.877	-0.0872	-0.395	-1.28	1.12	-1.21	-0.409	1.78	-0.201	0.249	1.51	-0.325	-0.455	-0.0454	-0.258	0.0341	1.51
-1.3	-0.489	-0.632	0.66	-0.522	-1.06	0.0723	0.112	0.238	-0.782	1.4	2.34	-1.68	0.677	-1.39	0.552	1.93	-0.717	0.716	1.27	0.366	-0.252	0.241	-0.0955	-0.218	1.14
-0.634	-0.78	-0.751	0.845	1.12	-0.63	0.377	0.332	0.332	-0.393	0.323	1.24	-1.12	0.467	-1.11	0.68	2.02	-0.372	0.341	1.23	-0.119	-0.291	0.324	-0.387	-0.18	1.8
-0.306	0.505	-0.997	0.868	1.94	-0.372	0.64	0.805	0.221	-0.373	0.839	1.33	-1.45	0.692	-1.19	0.74	1.23	-0.403	0.0902	1.06	-0.11	-0.469	0.117	-0.143	-0.161	1.75
-0.862	-1.63	-1.06	0.828	2.17	-0.36	-0.136	1.29	-0.0321	0.254	-0.221	0.198	-0.841	0.118	-0.851	0.406	0.516	-0.426	-0.82	1.4	0.337	-0.374	-0.238	-0.442	-0.483	1.21
-0.707	-0.481	-1.01	0.923	1.88	-0.806	-0.313	0.532	0.106	0.132	0.457	0.328	-0.699	0.379	-1.13	-0.366	1.4	-0.494	-0.117	0.573	0.0187	-0.321	-0.0956	-0.133	-0.528	0.773
-0.571	-0.086	-0.944	1.2	1.51	-0.445	-0.43	1.2	0.063	-0.444	-0.429	0.282	-0.928	0.101	-0.979	-0.292	1.92	-0.998	0.0253	0.499	-0.0916	-0.484	-0.197	-0.54	-0.637	0.0972
-0.796	-0.0946	-0.695	0.714	1.71	-0.374	0.173	1.83	-0.233	-0.977	0.545	1.65	-0.41	-0.927	-1	-0.492	0.953	-1.04	0.203	0.531	-0.805	-0.532	-0.239	-0.477	-0.212	-0.295
-1.36	-0.399	-0.56	0.323	0.7	-0.848	0.619	0.734	-0.108	-0.518	-1.7	-0.568	-0.48	-0.928	-1.3	-0.785	2.18	-1.36	0.583	0.812	-1.48	-0.304	-0.151	-0.337	-0.0511	1.34
-2.05	-0.261	-0.796	0.294	0.947	-0.907	1.35	0.702	0.0596	-0.463	-1.57	0.296	-1.24	-0.679	-0.376	-1.26	1.56	-1.48	0.356	0.707	0.164	-0.19	-0.228	-0.0222	-0.136	1.48
-1.59	-1.1	-0.755	0.0875	0.738	-0.417	-0.309	1.65	0.0695	0.176	-1.79	0.106	-1.55	-1.42	0.0299	-0.74	1.65	-0.993	0.954	0.439	-1.36	-0.0506	-0.515	-0.0932	-0.086	1.02
-1.06	-0.118	-1.22	-0.319	0.786	-0.188	1.49	2.18	0.295	0.489	0.652	1.4	-1.17	-1.87	-0.163	-0.711	1.04	-0.694	0.817	-0.173	-0.707	-0.0318	-0.349	-0.07	-0.201	0.926
-1.25	1.01	-0.906	0.00508	0.492	-0.487	1.31	1.78	0.631	0.691	-0.0735	0.0152	-1.39	-1.53	-0.0652	-1.31	1.57	-0.731	0.74	-0.488	-1.08	-0.0801	-0.339	-0.6	-0.263	0.55
-0.922	-0.27	-0.792	0.706	1.54	-0.132	0.689	0.917	1.04	0.612	0.832	-0.612	-1.13	-1.57	0.0588	-0.624	0.737	-0.494	0.349	-0.699	0.257	-0.107	-0.234	-0.407	-0.67	1.46
-0.989	0.164	-0.887	0.83	1.32	-0.898	1.76	1.15	1.39	0.43	0.564	1.34	-1.35	-1.11	0.205	-1.05	0.774	-0.828	0.327	-0.457	-0.176	-0.293	-0.348	-0.391	-0.656	2.01
-0.935	1.23	-1.01	1.24	1.36	-0.392	2.47	-0.551	1.73	0.163	0.455	1.36	-0.961	-1.13	0.538	-0.85	0.85	-0.535	1.05	-0.631	0.584	-0.11	-0.181	-0.0773	-0.669	0.991
-1.03	0.124	-1.07	0.894	1.81	-0.34	1.74	-0.139	1.26	-0.173	0.772	-0.101	-2.28	-0.569	1.96	-1.44	0.858	-1.25	0.154	-0.659	0.0299	-0.192	-0.129	-0.399	-0.59	1.08
-1.64	0.287	-1.05	0.815	1.07	-0.781	0.33	-1.25	0.892	0.185	-1.18	0.83	-1.05	-0.959	1.78	-0.784	1.22	-0.985	-0.127	0.223	0.065	-0.316	0.0542	-0.316	-0.709	0.373
-2.28	-0.0287	-1.15	1.32	0.771	0.254	1.05	-1.53	0.974	-0.286	-0.268	1.93	-0.594	-0.45	1.63	-0.0867	0.824	-1.15	0.193	0.323	-0.484	-0.0722	-0.183	-0.421	-0.951	-0.414
-1.78	-0.318	-1.2	0.92	0.456	0.641	1.67	-0.452	1.06	-0.0702	-0.336	1.62	-0.782	-0.316	1.12	-0.442	0.186	-1.14	-0.214	0.471	-1.16	-0.319	-0.431	-0.278	-0.913	-0.209
-1.77	0.274	-1.23	0.508	-0.106	0.718	2.13	-0.954	0.989	-0.35	-0.0773	0.0124	-0.801	-1.38	1.29	-0.425	-0.116	-1.25	0.693	0.549	-1.27	-0.111	-0.614	-0.554	-0.698	-0.268
-2.5	0.188	-1.19	0.416	-0.284	0.0887	2.32	-1.68	0.764	0.17	-0.183	0.203	-1.13	0.225	1.22	-1.35	-0.0338	-1.29	0.353	0.516	-0.794	-0.354	-0.697	-0.621	-0.563	1.01
-2.92	0.785	-0.948	0.564	-0.151	-0.56	1.12	-1.46	0.272	-0.522	-1.14	0.122	-1.32	0.54	0.732	-1.18	0.038	-1.83	0.289	0.027	-0.539	-0.356	-0.683	-0.3	-0.633	-0.0711
-3.05	1.31	-0.951	2.07	-0.0351	-0.563	0.665	-1.31	0.267	-1.1	-0.574	1.54	-0.365	0.82	0.586	-1.33	-0.289	-1.6	-0.216	0.158	0.241	-0.482	-0.822	-0.233	-0.94	0.266
-3.11	0.644	-0.994	1.62	0.0648	-1.28	0.552	-1.81	-0.13	-0.111	-0.351	1.09	-0.379	1.76	0.249	-0.841	-0.233	-2.04	-0.698	0.216	0.335	-0.45	-0.9	-0.535	-0.897	-0.255
-2.45	-0.157	-0.838	2.01	0.213	-0.882	1.01	-2.03	-0.187	-0.137	-0.311	1.64	-0.229	1.02	0.233	-0.127	0.094	-1.54	-0.971	0.425	0.0835	-0.61	-0.509	-0.491	-0.767	-0.686
-2.83	0.0927	-0.753	1.08	0.422	-0.742	0.489	-1.25	-0.672	0.524	-1.09	0.947	-0.143	0.17	0.19	1.29	0.622	-1.14	-0.0391	0.483	1.2	-0.713	-0.548	-0.612	-0.808	-0.588
-2.71	-0.0352	-0.935	0.489	-0.075	-1.06	-0.284	-1.31	-0.293	0.116	-0.77	0.542	-0.174	1.03	0.455	1.7	0.0151	-2.16	-0.137	0.525	0.896	-0.853	-0.256	-0.494	-1.29	-1.27
-2.93	-0.253	-1.02	0.725	0.0669	-1.38	0.69	-1.85	-0.475	-0.0618	-0.783	1.58	-0.268	0.764	0.63	2.09	0.409	-1.43	-0.685	0.799	0.258	-1.47	-0.397	-0.626	-1.03	-0.0958
-3	0.355	-1.18	0.966	-0.852	-1.45	2.1	-3.23	-0.791	-0.484	-0.0312	0.156	-0.878	0.892	0.786	2.34	0.658	-1.29	0.107	0.374	-1.57	-0.961	-0.518	-0.76	-1.31	0.00815
-2.91	0.162	-1.28	1.58	-0.47	-2.05	1.62	-2.41	-0.731	-0.218	-1.05	1.92	-0.523	1.09	1.15	2.09	-0.0167	-1.55	0.0806	-0.237	0.185	-0.624	-0.635	-0.696	-1.18	0.165
-2.29	-0.266	-1.24	1.02	-0.361	-2.28	1.68	-3.32	-0.65	-0.533	-1.03	1.69	-0.589	0.885	1.75	2.01	-0.0328	-1.18	0.0172	-0.566	0.307	-0.761	-0.651	-0.913	-0.993	-0.418
-1.33	-0.0477	-1.41	0.966	-0.451	-1.99	1.39	-2.74	-0.89	-0.643	-0.608	2.14	-1.08	0.22	1.29	1.55	0.544	-0.881	0.327	-0.338	0.176	-0.991	-0.788	-0.861	-1.04	0.307
-1.62	1.11	-1.21	1.22	-0.898	-2.29	2.13	-2.51	-1.23	-0.637	-0.213	0.982	-0.929	-0.433	1.08	1.08	-0.411	-1.4	0.661	0.225	-0.814	-0.957	-0.889	-0.735	-1.37	0.61
-1.12	-0.45	-1.17	1.05	-0.294	-1.45	0.582	-1.37	-1.07	-0.288	-1.2	0.837	-1.15	-0.355	1.27	0.436	-0.139	-1.31	-0.268	-0.653	-0.224	-0.761	-0.919	-1.02	-1.48	1.1
-1.01	-0.996	-1.33	0.765	-0.779	-0.509	0.826	-1.46	-1.34	0.358	-1.25	-0.509	-0.733	0.272	0.856	0.44	-1.04	-1.74	0.64	-0.806	0.701	-0.527	-0.726	-0.777	-0.971	1.14
-0.972	0.47	-1.17	0.52	-1.09	-0.454	1.42	-2.18	-1.5	0.467	-0.98	0.31	-1.12	0.454	1.36	0.488	-0.327	-1.27	0.169	-0.551	0.0539	-0.708	-1	-0.596	-1.11	1.59
-1.15	0.285	-1.41	0.166	-0.728	-0.513	2.07	-2.12	-1.24	0.862	-0.659	1.62	-0.832	-0.62	1.46	0.996	-0.0395	-1.71	0.693	-0.394	0.0654	-0.504	-0.236	-0.84	-1.2	0.248
-0.764	0.701	-1.22	0.205	-1.01	0.854	2.47	-1.69	-1.82	0.196	-2.14	1.49	-0.702	0.612	0.628	1.41	0.591	-1.1	-0.217	-0.166	0.141	-0.737	-0.583	-0.882	-1.17	-0.418
-0.721	0.0432	-1.23	-0.139	-1.5	1.42	1.2	-1.66	-1.62	0.113	-0.496	0.648	-0.546	1.17	-0.24	1.85	0.273	-0.885	-0.209	-0.0689	0.994	-0.772	-0.294	-0.999	-1.27	-0.505
-0.862	-0.395	-1.26	0.518	-1.11	0.71	0.451	-1.03	-1.06	0.703	-1.82	1.4	-0.423	0.266	0.0522	1.75	0.31	-1.46	0.435	0.346	0.429	-0.805	-0.833	-1.03	-1.46	-0.202
-0.902	-0.554	-1.37	0.29	-1.05	0.636	1.31	-0.5	-2.06	-0.501	-1.82	0.24	-0.672	0.772	-0.0564	1.8	-1.17	-1.5	0.929	0.798	0.597	-0.73	-0.914	-0.78	-1.48	0.732
-1.05	-0.272	-1.26	0.0782	-1	0.61	2.08	-0.838	-2.05	-0.4	-2.17	0.273	-0.467	0.432	0.107	1.78	-0.59	-1.22	0.483	0.122	0.101	-0.581	-1.01	-0.839	-1.43	0.618
-1.09	0.554	-1.15	-0.37	-1.61	-0.528	1.98	-0.494	-1.94	0.128	-0.9	0.226	0.209	0.725	0.0313	0.91	-0.73	-1.36	1.71	-0.12	0.0839	0.539	-1.12	-0.994	-1.64	0.197
-1.14	-1.46	-1.06	-0.322	-1.32	-0.0185	1.9	-2.13	-2.17	-0.0229	-2.69	2.02	0.317	-0.485	0.385	0.791	0.794	-1.05	0.372	0.259	0.195	0.769	-1.06	-1.15	-1.59	-0.0529
-1.24	-1.37	-1.12	0.0681	-1.76	0.291	1.71	-1.79	-1.96	0.0176	-0.554	0.272	0.245	-0.959	0.302	0.903	0.538	-0.832	1.27	-0.25	0.2	0.981	-0.594	-1.13	-1.57	-0.211
-1.32	-0.437	-1.1	-0.331	-1.76	1.21	1.08	-0.728	-1.64	-0.761	-1.61	-0.25	-0.796	-1.29	0.156	1.05	1.04	-2.31	0.432	0.119	0.368	0.434	-0.638	-1.01	-1.32	-0.143
-0.98	-0.513	-1.4	-0.997	-1.34	1.3	1.03	-1.33	-2.51	-0.067	-0.734	0.0994	-0.909	-0.248	0.562	0.282	0.46	-2.63	0.538	0.62	-0.0846	0.636	-0.988	-1.02	-1.37	-0.372
-1.08	1.29	-1.36	-1.55	-0.962	0.607	0.663	-0.85	-1.8	-0.508	-1.7	0.831	-0.503	0.0432	0.684	0.255	-0.00445	-1.65	-0.00233	0.281	-0.184	0.468	-1.03	-1.28	-1.78	-0.0176
-0.849	1.33	-1.34	-1.21	-0.715	-0.0182	1.01	-1.44	-1.95	-1.13	-2.06	1.34	-0.519	-0.48	0.63	-0.0639	0.276	-1.94	0.388	0.736	-0.0617	0.727	-1.11	-1.16	-1.78	-0.0363
-0.415	0.338	-1.39	-1.46	-1	0.384	1.32	-1.63	-1.61	-0.446	-1.11	1.54	-0.901	-0.98	0.872	-0.294	0.529	-1.45	0.585	1.07	0.912	0.705	-0.988	-1.18	-1.68	-0.06
-0.724	0.729	-1.37	-0.745	-1.1	-0.396	0.877	-0.644	-1.86	-0.266	-0.998	0.519	-0.119	0.0495	0.493	-0.123	0.606	-1.39	0.109	1.23	1.66	0.582	-0.682	-1.15	-1.72	-0.729
-1.19	0.726	-1.1	-0.459	-1.5	-0.294	0.915	-1.78	-2.02	-0.446	-0.54	0.747	0.0125	-0.196	0.136	-0.608	1.15	-1.01	1.57	0.629	1.33	0.707	-0.627	-1.18	-1.98	-1.62
-1.34	0.169	-1.16	-0.313	-1.67	-0.498	0.623	-2.16	-2.04	-0.36	-1.96	1.63	1.05	0.337	0.293	-0.229	0.884	-1.2	1.38	0.649	1.72	0.42	-0.396	-1.24	-1.9	-1.17
-1.19	-0.452	-1.36	-1.06	-1.54	-0.58	-0.134	-1.75	-1.9	-0.0246	-0.7	1.84	2.26	0.74	-0.0744	-0.255	1.19	-1.02	1.62	0.807	1.01	0.481	-0.584	-1.29	-1.82	-0.166
-0.863	0.367	-1.54	-1.32	-0.716	-0.78	0.74	-0.809	-1.61	1.38	-0.956	1.02	2.75	0.809	0.0104	-0.325	0.00565	-1.3	0.895	0.699	1.34	0.462	-0.685	-1.22	-1.55	-0.35
-0.704	0.0853	-1.55	-0.749	-0.0226	-0.672	0.937	-1.04	-2.23	1.28	-1.57	0.31	2.92	0.543	-0.0703	-0.42	0.4	-1.29	1.23	0.146	0.619	0.369	-0.229	-1.29	-1.66	0.0948
-0.882	1.82	-1.43	-0.487	0.0481	-0.651	0.808	-0.833	-2.17	-1.33	-1.87	2.13	1.89	-0.815	-0.88	-0.182	-0.113	-1.64	0.495	0.678	1.41	0.351	0.274	-1.12	-1.88	-0.373
-1	3.67	-0.61	-0.0294	-0.189	-0.938	1.01	-0.746	-1.99	-0.198	-2.64	0.725	0.917	-0.125	-0.343	-0.415	0.218	-1.39	1.22	0.447	1.01	0.323	0.647	-1.44	-1.83	-0.537
-1.17	2.51	-0.137	0.0867	-0.311	-0.654	0.344	-1.37	-2.21	-1	-0.359	1.44	0.859	-1.54	-0.965	-0.127	1.66	-1	0.105	0.683	-0.097	0.244	0.355	-1.39	-1.91	-0.722
-1.23	2.8	0.231	0.665	-0.713	-0.296	0.936	-1.09	-2.13	-1.59	-0.874	0.608	1.18	-2.55	-0.573	0.257	3.09	-0.936	0.347	0.522	-0.581	-0.126	0.49	-1.42	-1.88	0.00306
-1.04	2.8	-0.0297	0.577	-0.341	0.379	0.808	-0.823	-2.14	-0.681	-1.05	-0.183	0.934	-1.52	-0.443	0.746	2.26	-0.612	0.351	-0.36	0.271	-0.135	0.548	-1.64	-1.79	-0.501
-0.929	2.42	-0.0177	-0.324	-0.126	-0.303	0.54	-1.43	-1.4	-0.268	-0.566	0.788	1.42	-1.76	0.0668	0.728	2.52	-1.01	0.567	-0.0206	-0.329	-0.328	0.889	-1.01	-1.28	-0.376
-1.6	2.34	0.00845	-0.444	-0.0783	-0.724	1.18	-0.382	-1.62	-1.78	-1.96	1.16	1.65	-1.5	0.0223	0.874	2.53	-0.91	0.131	0.104	0.19	-0.0267	0.859	-1.11	-0.977	-0.906
-1.49	2.95	-0.528	-0.675	-0.198	-0.808	1.74	0.19	-1.64	-1.88	-0.445	1.07	0.645	-1.16	-0.539	1.03	2.92	-0.457	0.0733	0.314	0.0674	-0.07	0.889	-1.33	-1.24	-0.247
-1.27	1.94	-0.0348	-0.522	-0.169	-0.766	1.33	-1.82	-1.18	-1.83	-0.217	-0.427	0.85	-1.09	-0.841	0.999	2.64	-0.315	0.00401	0.749	0.352	-0.0668	0.417	-1.35	-1.13	-0.44
-1.52	1.44	0.0653	-0.837	-0.524	0.0242	0.875	-1.89	-1.09	-1.56	-1.33	1.36	1.64	-1.56	-0.683	0.792	3.66	-0.117	0.52	-0.0415	0.102	0.0114	0.508	-1.41	-1.07	0.471
-0.877	1.76	-0.138	-1.24	-0.143	0.104	0.969	-2.07	-1.39	-0.597	-1.64	1.23	0.062	-0.43	-0.405	1.18	3.4	-0.303	0.699	0.654	-0.0396	-0.313	0.524	-1.43	-1.12	0.117
-0.607	1.26	-0.32	-1.57	-0.555	-0.0482	1.65	-0.371	-1.7	0.152	-1.69	1.44	0.604	-0.465	-0.374	0.879	2.21	-1.16	-0.00388	1.16	1.19	-0.36	0.591	-1.2	-1.16	0.0481
-0.44	2.93	-0.431	-1.59	-0.25	-0.278	1.65	-0.765	-1.93	-0.223	-0.689	1.78	1.08	-1.02	-0.694	1.06	2.07	-1.11	0.733	0.719	0.83	-0.351	0.533	-1.17	-1.01	-0.0684
-0.533	3.1	-0.782	-1.83	-0.0803	-0.486	1.7	-1.24	-1.9	0.617	-1.27	0.806	0.959	-0.451	-1.15	0.768	1.25	-1.24	0.984	0.293	-0.506	-0.39	0.208	-1.24	-1.21	0.535
-0.818	1.63	-0.685	-1.85	1.14	-0.909	1.44	-2.21	-2.39	0.634	0.221	0.893	0.226	-0.0962	-1.33	0.541	0.258	-0.495	-0.101	0.487	0.271	-0.423	0.273	-1.01	-1.31	0.578
-0.673	1.79	-0.338	-1.84	2.06	-0.503	1.78	-0.872	-1.83	0.264	-2.06	1.11	0.43	-1.23	-1.52	0.682	0.345	-0.348	-0.23	0.546	-0.0127	-0.666	0.233	-0.954	-1.12	0.73
-1.04	2.74	-0.599	-2.27	2.14	0.0551	0.868	-1.35	-2.04	-1.51	-2.13	1.02	0.447	-0.646	-1.33	0.669	0.887	0.00979	0.916	-0.146	0.156	-0.425	0.147	-1.29	-1.13	-1.53
-0.695	1.9	-0.582	-2.14	2.15	-0.394	0.797	-0.37	-2.12	-0.618	-1.97	-0.553	-0.379	-0.769	-1.42	0.0952	0.902	-0.295	0.202	0.496	-0.525	-0.319	0.112	-1.6	-1.32	-0.831
-0.405	2.33	-0.869	-1.85	2	0.366	2.7	-0.432	-1.81	-0.872	-1.37	-0.11	0.424	-0.0159	-1.25	0.091	0.787	-0.675	-0.155	-0.0839	-0.793	-0.343	-0.0631	-1.15	-1.59	-0.745
-0.294	2.65	-0.762	-2.25	1.74	-0.0434	1.35	-1.55	-2.17	0.36	-1.31	0.642	0.471	0.429	-1.21	-0.228	1.36	-0.942	0.655	-0.631	-0.505	-0.506	-0.149	-1.3	-1.21	0.32
0.0299	3.45	-0.945	-1.75	1.43	-0.184	1.49	-2.17	-1.66	-0.193	-1.93	1.74	0.485	0.57	-1.6	0.081	1.09	-0.711	0.928	-0.852	0.636	-0.399	-0.00972	-1.18	-1.11	-0.00956
0.464	2.32	-1.01	-1.86	1.72	0.929	0.668	-0.949	-1.37	0.606	0.13	-0.388	0.0251	0.415	-0.911	0.112	1.31	-0.242	0.97	-0.952	0.714	-0.621	-0.319	-1.44	-1.24	-1.02
0.375	3.27	-1.01	-2.4	1.07	0.387	1.86	-0.703	-1.87	-0.543	-0.951	0.817	0.575	0.164	-1.56	-0.19	1.03	-0.878	0.767	-0.57	0.727	-0.59	-0.162	-1.33	-1.37	-0.455
0.421	2.01	-0.874	-1.8	0.457	0.791	0.0146	-0.373	-1.19	-0.577	-1.9	1.35	-0.341	0.454	-0.978	-0.621	2.07	-0.693	1.44	-0.623	-0.529	-0.617	-0.458	-1.35	-1.25	-0.0277
0.786	2.94	-0.851	-1.37	0.719	0.00524	0.253	-0.182	-1.24	-1.43	-2.09	0.26	-0.0151	1.42	-1.13	0.198	2.46	-1.25	0.62	-0.0975	-0.555	-0.431	-0.531	-1.05	-1.38	0.0204
0.934	2.92	-1.16	-0.782	0.44	0.0212	-0.586	0.0502	-0.583	-1.76	-1.06	0.0768	0.00429	2.25	-0.991	-0.18	1.72	-1.51	0.604	-0.182	-0.0923	-0.471	-0.22	-1.41	-1.5	-0.325
0.887	3.04	-1.22	-0.865	-0.175	0.309	0.626	-0.15	-1.43	-0.993	-0.708	-0.42	-0.155	1.85	-1.65	-0.386	1.69	-1.42	1.59	-0.171	0.347	-0.391	-0.466	-1.23	-1.53	-0.537
0.491	3.16	-1.28	-0.545	0.514	0.496	0.451	-0.845	-1.07	-1.24	-0.321	1.35	-0.22	2.3	-1.87	0.156	1.7	-1.68	0.898	-0.872	1.16	-0.319	-0.146	-1.26	-1.38	0.405
0.562	2.86	-1.46	-0.613	0.845	0.329	0.806	-0.894	-1.88	-0.141	-1.26	2.44	-0.165	1.32	-1.8	-0.203	0.874	-1.64	2.01	-1.08	1.96	-0.439	-0.697	-1.37	-1.27	0.54
1.05	2.48	-1.28	-0.488	1.26	0.391	0.112	-0.111	-2.1	0.443	-0.965	1.43	0.577	1.25	-1.74	-0.00908	0.3	-0.929	1.74	-0.612	0.933	-0.587	-0.21	-1.39	-1.06	-0.173
0.829	2.2	-1.19	-1.07	1.5	0.591	0.863	-0.167	-1.19	-0.565	-1.76	0.656	0.0278	0.482	-1.16	-2e-05	0.721	-0.621	0.959	-0.786	1.59	-0.711	-0.475	-1.54	-1.41	-0.453
0.503	2.38	-1.23	-0.275	0.828	-0.0731	0.791	0.302	-0.958	-0.113	-1.44	1.46	-0.919	0.485	-1.78	0.196	0.549	-1.37	1.26	-1.23	0.524	-0.829	-0.448	-1.65	-1.09	1.31
0.334	1.67	-1.43	-0.42	0.969	-0.28	0.611	-1.43	-1.29	-0.258	-0.339	0.568	0.0358	1.2	-1.84	0.717	0.272	-1.41	1.26	-0.62	-0.846	-0.806	-0.593	-1.6	-1.1	1.13
0.0495	1.32	-1.41	-0.343	0.982	0.653	1.16	-0.749	-0.987	0.619	-1.38	0.546	-0.22	-0.373	-1.9	0.659	-0.00553	-1.14	0.42	-0.905	-0.0531	-0.841	-0.437	-1.36	-0.593	1.31
-0.0925	2.4	-1.42	-0.506	0.935	1.09	1.7	-0.707	-0.985	-1.01	-1.3	0.84	-0.187	-0.502	-1.57	0.086	0.649	-1.17	0.923	-0.757	-0.528	-0.671	-0.12	-1.37	-1.29	1.71
0.113	1.59	-1.47	-0.449	0.944	0.63	0.541	0.927	-1.16	0.125	-1.73	-0.349	-0.417	0.44	-2.01	-0.16	0.446	-1.38	0.365	-0.724	0.272	-0.823	-0.327	-1.19	-1.02	1.02
0.711	0.863	-1.28	-0.581	0.323	0.215	-0.159	0.686	-1.27	-0.45	-1.88	1.53	-0.927	-0.374	-2.4	0.0619	0.965	-1.23	-0.0688	-0.631	-0.301	-0.887	-0.502	-1.33	-1.25	1.1
0.627	1.01	-1.32	-0.626	0.419	0.625	-0.222	0.0481	-1.54	-0.546	-0.848	0.584	-0.824	0.287	-2.4	0.683	0.139	-0.994	0.0268	-0.554	0.76	-0.932	-0.635	-1.36	-1.14	0.805
0.933	1.83	-1.29	-0.347	0.113	0.0861	0.328	-0.528	-1.4	-1.64	0.356	1.54	-0.777	0.915	-1.5	1.25	-0.745	-1.1	-0.424	-0.268	0.953	-1.07	-0.874	-1.57	-1.48	1.25
1.07	1.59	-1.23	-0.887	-0.263	0.245	0.402	0.683	-1.14	-2.14	-0.638	1.79	-0.537	0.872	-1.98	1.04	1.02	-1.24	0.401	-0.942	0.685	-1.29	-0.63	-1.63	-1.3	1.7
1.63	0.838	-1.21	-1.26	-0.0691	-0.293	-0.293	0.0488	-1.08	0.195	-1.24	-1.19	-0.46	0.947	-1.73	1.43	0.202	-1.3	0.637	-0.947	0.888	-1.28	-0.919	-1.73	-1.31	1.48
1.18	0.97	-1.42	-1.35	-0.15	-0.91	0.0331	-0.223	-1.34	-1.52	-1.17	1.06	-0.622	-0.164	-1.39	0.62	0.662	-1.89	0.0868	-1.23	-0.67	-1.31	-0.285	-1.77	-1.27	1.84
0.795	1.09	-1.38	-1.46	0.0831	-0.617	-0.168	0.0622	-1.45	-1.62	-1.29	0.529	-0.647	-0.149	-1.86	0.999	0.351	-1.49	-0.818	-1.09	-0.518	-1.26	-0.158	-1.52	-1.55	1.94
0.309	0.512	-1.23	-1.38	0.123	-1.04	0.916	0.414	-1.2	-1.17	-0.734	0.182	-0.73	-0.206	-2.44	1.66	0.764	-1.05	-0.691	-1.1	-0.399	-1.54	-0.0287	-1.49	-1.18	2.54
0.187	0.873	-1.54	-1.04	-0.0747	0.154	-0.549	0.901	-1.26	-1.44	-1.19	0.847	-1.7	-1.84	-2.26	1.19	-0.613	-1.24	-0.712	-0.62	0.277	-1.21	0.0982	-1.42	-1.22	2.48
0.117	0.997	-1.41	-0.87	-0.0962	-0.487	0.0129	0.323	-1.35	-1.06	0.0683	1.97	-1.37	-1.42	-1.68	1.83	0.493	-1.5	-0.349	0.102	0.342	-1.26	-0.298	-1.7	-1.18	2.39
-0.0959	0.904	-1.14	-0.942	-0.208	-0.372	0.654	0.316	-1.68	-1.41	-0.36	1.27	-1.74	0.528	-1.76	2.59	0.334	-1.08	-0.599	-0.239	-0.559	-1.08	-0.282	-1.81	-1.67	2
-0.268	1.04	-1.04	-0.888	-0.306	-1.12	0.472	0.422	-1.7	-0.912	0.959	0.566	-0.882	0.694	-1.64	3.06	-0.427	-0.929	-0.277	-0.417	-0.466	-0.973	-0.104	-1.83	-1.6	2.08
-0.665	1.07	-1.18	-0.904	-0.374	-0.198	0.344	1.28	-1.46	-0.546	-0.625	-1.17	-0.948	0.38	-1.85	2.95	0.0616	-0.979	-0.394	-0.573	0.751	-0.608	-0.0649	-1.71	-1.66	1.82
-0.356	0.395	-1.09	-1.1	-0.217	0.31	0.414	1.21	-1.37	-0.573	-1.14	0.0163	-1.42	-0.218	-1.97	3.01	-0.272	-1.1	-0.882	-1.19	0.764	0.33	-0.0471	-1.63	-1.65	2.23
0.367	-0.00509	-1.07	-0.924	0.487	0.455	-0.268	0.283	-1.69	-1.1	-1.41	-0.248	-0.829	1.05	-2.01	3.28	0.219	-1.04	0.17	-1.12	-0.00292	0.482	-0.323	-1.42	-1.23	2.05
0.502	0.104	-1.23	-0.352	0.571	1.24	0.609	-0.5	-0.878	-2.03	-0.179	-0.08	-0.645	-0.0902	-1.24	3.62	0.793	-1.31	-0.0923	-1	0.269	0.545	-0.432	-1.38	-0.952	1.86
0.434	0.114	-1.13	-0.392	0.314	1.65	0.0202	0.668	-0.939	-1.46	-1.11	0.779	-1.16	0.282	-2.35	2.73	0.371	-0.93	0.0381	-1.01	0.228	0.399	0.00979	-1.38	-0.608	1.72
-0.299	0.758	-1.06	0.392	0.564	1.18	0.13	0.552	-1.13	-1.43	0.146	-0.908	-1.14	1.28	-1.2	2.52	0.901	-1.08	-0.745	-1.02	0.358	0.637	0.719	-1.28	-0.979	1.43
-0.779	0.293	-1.09	0.437	0.429	0.599	-0.643	0.186	-1.08	-0.892	-0.282	0.867	-1.01	1.08	-1.88	2.25	0.703	-1.07	-0.649	-0.369	0.25	0.852	0.904	-1.4	-0.278	0.669
-0.511	-0.0287	-1.29	0.931	0.393	0.906	-0.157	-0.78	-1.15	-1.41	-1.35	0.677	-1.47	0.946	-1.47	2.21	0.202	-1.48	-0.918	-0.746	-0.353	0.816	0.527	-1.46	0.463	0.683
-0.521	-0.305	-1.18	1.28	0.561	1.21	-0.474	0.115	-0.534	-0.283	-2.42	0.752	-1.42	0.71	-1.79	1.97	0.579	-1.2	-0.879	-1.13	0.0112	0.974	0.677	-1.15	1.04	0.342
0.145	0.284	-1.17	1.01	0.876	0.613	0.105	-0.377	-0.465	-0.0718	-0.995	-0.698	-1.04	0.187	-2.34	1.88	0.132	-1.28	-0.487	-0.518	-1.24	1	0.602	-1.38	1.13	0.82
0.35	-0.304	-1.27	0.362	1	0.928	0.391	0.73	-1.45	-0.968	-0.856	0.554	-1.38	-0.221	-1.86	2.1	0.132	-0.724	3.87	-0.962	0.348	0.758	0.397	-1.35	1.17	0.479
0.742	-0.409	-1.28	0.072	0.743	0.228	0.661	0.484	-1.32	-0.888	-0.359	2.08	-1.66	-0.0987	-2.47	2.43	0.527	-1.16	6.26	-0.909	-0.622	1.34	0.574	-1.34	1.01	0.547
0.217	0.0759	-1.2	-0.644	0.398	0.484	-0.275	1.34	-1.2	-0.936	-0.887	1.08	-0.657	0.0499	-2.27	2.17	0.264	-1.18	6.1	-1.02	-0.0247	1.2	0.211	-1.57	0.742	1.05
0.949	0.0247	-1.25	-0.134	-0.204	-0.437	-0.0749	-0.602	-1.34	-0.866	1.29	0.205	-1.04	0.0575	-2.18	2.61	0.22	-1.26	4.86	-0.356	-0.762	1.16	0.516	-1.33	0.842	0.252
0.894	0.715	-1.38	0.466	-0.162	0.169	0.296	0.116	-1.26	-0.893	1.16	1.05	-0.704	0.488	-2.26	2.47	-0.945	-0.969	5.05	-0.414	-0.262	0.897	0.196	-1.26	0.486	0.61
1.03	0.221	-1.1	0.0837	0.223	0.021	-0.0605	1.25	-1.65	-0.429	0.567	1.09	-0.938	-0.0401	-2.32	1.51	-0.488	-0.6	4.62	0.343	0.928	0.91	0.45	-1.52	0.689	0.609
0.791	0.14	-1.25	0.0929	0.251	-0.044	-0.777	1.5	-1.52	0.58	-0.712	0.447	-0.0403	-0.238	-2.34	1.19	-0.518	-0.852	3.68	0.224	0.235	0.78	0.121	-1.1	0.153	0.643
0.797	0.68	-1.52	0.332	-0.167	0.296	-1.51	0.208	-1.07	-0.179	-1.46	0.301	-0.541	-0.0186	-2.52	1.14	-0.233	-0.865	3.08	0.755	1.26	0.974	0.196	-1.39	0.315	1.29
0.739	1.73	-1.19	0.421	0.153	0.638	-0.147	0.166	-0.69	-0.172	-1.7	-0.392	-1.6	0.404	-2.48	0.43	-0.477	-0.885	3.82	0.201	-0.64	0.546	0.0416	-1.4	0.482	0.812
0.335	1.08	-1.06	0.829	0.0958	0.0259	-1.11	0.742	-1.06	-0.904	-0.148	-1.43	-2.22	0.388	-1.84	0.723	-0.371	-0.566	2.73	0.105	0.413	0.364	-0.187	-1.42	0.411	0.632
0.486	0.973	-1.02	0.63	0.522	-0.14	-0.557	-0.661	-1.05	0.165	0.25	-1.96	-1.61	-0.114	-2.18	0.362	0.662	-0.801	3.57	0.413	1.35	0.237	-0.0407	-1.51	0.0505	0.136
0.385	1.53	-0.976	0.738	0.734	0.228	-1.01	-0.209	-1.2	0.861	0.678	0.299	-0.308	-0.931	-2	-0.173	1.01	-0.732	2.67	0.217	0.506	0.269	-0.324	-1.38	0.206	0.185
0.12	1.29	-1.21	-0.111	0.732	0.735	-0.0119	1.04	-2.02	1.25	-0.96	-0.451	-1.37	-0.966	-2.08	0.19	0.3	-0.775	3.35	-0.193	0.797	0.0653	-0.695	-1.26	0.32	-0.196
0.0897	0.387	-1.31	0.408	0.877	0.459	0.24	0.482	-1.33	1.53	-0.97	-0.351	-1.26	-2.13	-2.11	-0.14	0.766	-0.562	3.07	0.182	0.47	0.137	-0.478	-1.37	0.335	0.773
-0.297	0.322	-1.14	0.215	0.404	-0.454	0.0938	-0.373	-1.65	1.26	-2.59	-0.942	-1.45	-1.98	-2.28	-0.268	0.401	-0.459	2.1	0.775	0.771	0.172	-0.646	-1.58	0.24	-0.11
-0.195	0.881	-1.34	0.222	0.5	-0.705	-0.0968	-0.461	-0.653	1.34	-0.832	0.938	-1.74	-0.539	-1.87	-0.148	0.528	-0.926	1.75	-0.187	0.392	0.409	-0.349	-1.76	-0.00979	0.225
-0.206	0.874	-1.31	0.377	0.0495	-0.708	-0.601	0.451	-2.01	0.553	-0.132	0.319	-0.788	-0.609	-2.29	-0.281	-0.0355	-0.863	1.54	-0.207	1.39	0.319	-0.2	-1.57	0.155	-0.15
-0.23	1.21	-1.46	0.206	0.0505	-0.558	-1.19	0.0916	-1.53	0.0195	1.33	0.453	-0.355	-1.35	-2.34	-0.154	0.734	-1.04	1.62	0.191	1.65	0.197	-0.283	-1.39	-0.1	-0.0122
-0.164	1.39	-1.33	1.04	0.765	0.152	0.0653	0.635	-1.89	0.512	-0.0677	-0.41	-0.0505	-1.69	-2.64	-0.894	0.688	-0.946	1.09	0.0235	1.31	0.159	-0.62	-1.39	0.256	-0.393
-0.27	0.424	-1.1	0.42	0.545	0.261	-0.707	-0.49	-1.65	0.108	-1.61	0.154	0.548	-1.47	-2.44	0.0659	0.451	-1.08	1.03	0.278	0.657	0.221	-0.563	-1.63	-0.0144	-0.531
-0.293	0.404	-0.996	0.0246	-0.424	0.0591	-0.768	1.02	-2.15	0.386	-0.596	-0.766	-0.268	-2.32	-2.62	0.306	0.6	-1.4	1.14	0.299	0.276	0.197	-0.48	-1.69	-0.218	0.394
-0.256	-0.201	-0.933	-0.38	-0.587	-0.0923	-0.0703	1.19	-2.79	0.652	-1.31	-0.408	-0.299	-0.98	-2.67	-0.328	0.853	-1.05	1.29	0.677	1.73	-0.0924	-0.372	-1.36	0.0615	0.698
-0.13	0.63	-1.03	-0.634	-0.196	0.0511	0.0897	1.32	-2.21	0.393	-1.35	1.1	0.233	0.195	-2.42	0.41	1.28	-0.961	0.971	0.745	0.743	-0.00674	-0.797	-1.72	-0.167	0.547
-0.0271	0.43	-1.2	-0.189	0.0391	-0.199	-0.68	-0.117	-1.74	-0.02	-1.66	0.257	-0.583	0.856	-2.07	0.575	0.346	-1.09	0.369	0.558	-0.176	-0.169	-0.752	-1.39	-0.292	0.436
-0.214	0.856	-1.43	-0.59	-0.454	0.122	-0.283	0.359	-2.23	1.12	-0.431	0.646	-0.904	0.77	-1.49	0.145	0.698	-0.76	2.32	0.93	-0.237	-0.0647	-0.828	-1.67	-0.338	-0.291
-0.686	0.907	-1.45	-0.728	-0.0371	0.542	-0.509	0.552	-2.43	1.84	-0.677	0.102	-0.397	0.272	-1.55	-0.0255	0.233	-1.06	1.72	0.823	0.377	-0.295	-0.543	-1.71	-0.51	-0.0178
-0.649	0.3	-1.47	-1.15	0.199	0.0877	-0.573	1.26	-2.55	1.74	-0.262	-0.513	-0.703	0.993	-1.68	-0.0952	1.33	-0.874	0.232	0.204	0.825	-0.348	-0.658	-1.8	-0.659	0.138
-0.649	0.262	-1.61	-0.865	-0.215	-0.12	0.199	1.73	-2.47	0.382	-0.554	-0.273	-0.503	0.285	-1.97	-0.365	0.975	-0.807	0.498	0.336	0.496	-0.207	-0.6	-2	-0.694	0.0639
-0.533	-0.766	-1.95	-0.833	-0.123	0.388	-0.715	1.16	-2.57	0.249	0.0418	0.42	-0.596	0.749	-2.34	-0.28	0.651	-0.88	1.32	0.456	-0.299	-0.0222	-0.387	-1.38	-0.484	0.278
-0.154	0.0777	-1.92	-1.48	-0.0258	-0.0948	-0.441	1.82	-2.6	-0.0471	0.238	-0.487	-1.14	0.362	-2.39	-0.632	0.667	-0.605	1.54	0.385	-1.26	0.194	-0.741	-1.67	-0.242	-0.0623
0.0511	-0.25	-1.92	-1.63	-0.186	-0.356	-0.975	1.52	-2.41	0.706	-0.757	-1.09	-0.757	0.635	-1.76	-0.924	0.637	-0.455	0.574	0.453	0.509	-0.212	-0.656	-1.72	-0.345	-0.0623
1.09	-0.287	-2.11	-1.84	-0.405	0.0188	-0.236	1.56	-2.11	1.37	-0.797	0.263	-1.47	0.33	-1.58	-0.709	0.355	-0.703	0.45	0.521	0.571	-0.0636	-0.762	-1.63	-0.568	-0.321
1.19	-0.583	-1.99	-1.81	-1.01	-0.161	0.461	0.47	-2.2	0.479	-0.647	-0.466	-1.33	0.245	-1.88	-0.985	0.157	-0.792	1.22	0.471	-1.28	-0.197	-0.399	-1.42	-0.808	-0.123
1.7	0.11	-2.04	-1.92	-0.809	-0.0315	0.404	1.75	-1.87	1.14	-0.984	-0.0623	-1.51	-0.766	-1.64	-0.783	0.773	-0.963	0.649	0.515	-1.01	-0.457	-0.724	-1.73	-0.619	0.188
1.95	-0.416	-1.94	-2.11	-1.33	-0.317	0.537	1.92	-1.56	1.69	-0.257	1.56	-0.167	-1.79	-2.18	-1.01	0.708	-0.682	0.679	0.448	-0.797	-0.427	-0.422	-1.76	-0.671	0.0817
1.98	-0.492	-1.99	-1.72	-1.25	-0.247	0.643	2.02	-2.18	1.35	-0.946	-0.00969	-0.993	-3.07	-2.53	-0.559	-0.189	-0.865	0.783	0.473	-1.58	-0.234	-0.744	-1.56	-0.931	-0.76
1.71	0.142	-1.71	-1.78	-1.38	-0.681	0.611	2.43	-2.37	1.41	-0.189	-0.481	-0.553	-2.36	-2.38	-0.748	-0.355	-1.01	0.0217	0.518	-1.55	-0.0279	-0.692	-1.5	-1.07	-0.97
1.38	0.316	-2.07	-1.83	-0.596	-1.31	1.21	2.42	-2.1	1.77	-0.365	-0.949	-0.998	-1.3	-2.04	-0.884	-0.706	-0.806	0.394	-0.21	-1.22	-0.284	-0.887	-1.7	-1.11	-1.43
1.91	0.15	-2.12	-1.77	-0.392	-0.0695	0.854	1.23	-2.35	3.53	-0.407	-0.132	-1.29	-1.09	-1.77	-1.09	-0.0949	-0.893	0.534	-0.439	-0.871	-0.361	-0.742	-1.41	-0.837	-0.653
1.74	0.0277	-2.13	-1.69	-0.366	-0.829	0.415	0.894	-2.44	2.79	-0.754	-0.282	-1.98	-1.73	-1.85	-0.498	-0.269	-1.15	-0.379	-1.33	-1.24	-0.421	-0.667	-1.69	-0.856	-0.159
1.56	0.0293	-1.69	-2.06	-0.487	-0.299	0.312	1.32	-2.46	1.63	-0.266	-0.366	-0.435	-1.6	-1.42	-1.05	0.148	-1.09	-0.639	-0.849	-1.49	-0.54	-0.745	-1.78	-1.2	-0.662
1.74	-0.0301	-1.32	-2.38	-1.13	-0.684	0.28	1.31	-1.76	1.82	-0.555	0.162	0.472	-2.14	-1.25	-1.28	-0.749	-0.576	-0.834	-0.713	-2.85	-0.619	-0.713	-1.01	-0.872	-0.558
1.87	0.139	-1.4	-2.11	-1.07	-0.333	-0.172	0.256	-1.27	1.18	-0.417	-0.577	1.17	-1.46	-1.2	-0.921	-0.106	-0.96	-0.247	-0.471	-2.11	-0.275	-0.998	-0.258	-1.22	-1.08
1.93	-0.29	-1.29	-2.21	-0.739	0.0492	-0.211	1.38	-1.37	2.77	-1.17	-0.219	1.21	-2.62	-1.47	-1.31	0.291	-0.74	-0.357	-0.75	-1.71	-0.28	-0.631	-0.324	-1.54	-0.926
2.13	-0.218	-1.53	-2.18	-0.82	0.655	0.0692	0.414	-2.26	1.86	-2.14	-1.48	1.33	-2.41	-2.1	-0.891	-1.09	-1.06	-0.505	-0.409	-2.4	-0.222	-0.614	-0.384	-1.24	-0.498
2.25	-0.00871	-1.53	-2.62	-1.12	0.518	0.199	2.01	-2.04	1.14	-1.6	-0.182	1.67	-3.56	-2.21	-1.36	-0.535	-1.01	-1.12	-0.463	-0.592	-0.285	-0.313	-0.59	-1.18	-0.415
1.89	0.823	-1.41	-2.18	-1	0.574	-0.0143	0.0844	-2.17	1.63	-1.2	0.567	1.43	-3.06	-1.97	-1.51	-0.0502	-1.03	-0.133	-1.29	-1.56	-0.219	-0.512	-0.393	-1.21	-0.00283
1.62	0.72	-1.52	-2.12	-1.42	0.345	-0.562	0.368	-2.06	1.82	-0.605	-1.04	0.793	-2.96	-1.98	-1.35	1.22	-1.14	-0.24	-1.9	-2.06	-0.263	-0.432	-0.789	-0.966	0.156
1.45	0.00415	-1.81	-2.23	-1.12	0.127	0.469	0.827	-1.95	0.939	0.168	-1.48	1.43	-1.98	-2.04	-1.62	0.21	-0.695	0.522	-0.578	-3.05	-0.285	-0.349	-0.473	-1.1	-0.348
1.43	0.737	-2.01	-2.59	-1.3	-0.835	0.65	1.65	-2.31	2.12	-0.724	0.761	1.22	-1.56	-1.79	-1.98	-0.912	-0.526	0.109	-0.671	-1.21	-0.154	-0.723	-0.501	-1.3	-1.12
1.45	0.196	-1.72	-2.4	-1.04	-0.0804	-0.0299	2.04	-2.24	2.03	-2.96	0.413	1.72	-2.37	-1.8	-2.19	0.336	-0.586	0.525	-0.215	-1.5	-0.0338	-0.608	-0.634	-0.931	-0.266
1.63	0.131	-1.68	-2.09	-0.992	-0.945	-0.101	0.812	-2.46	2.25	-1.2	-0.864	0.577	-1.8	-2.14	-2.35	0.0964	-0.722	0.744	-1.65	-0.171	1	-0.742	-0.62	-1.12	-1.12
1.74	-0.208	-1.73	-2.23	-0.988	-1.23	-1.11	0.635	-2.63	2.53	-0.892	0.217	0.92	-1.91	-2.43	-1.63	-0.375	-0.458	0.652	-0.421	-1.27	0.876	-0.312	-0.919	-1.49	-2.37
2.26	-0.302	-1.78	-2.28	-1.25	-0.95	-0.645	1.97	-2.65	2.41	-0.596	1.21	0.728	-0.928	-1.97	-2	0.157	-0.275	0.0482	-1.42	-0.734	0.817	-0.451	-0.876	-1.15	-1.03
1.6	-0.42	-1.87	-2.2	-1.03	-1.26	0.22	1.52	-2.04	2.25	-0.809	-1.15	0.729	-1.67	-1.84	-2.15	-0.403	-0.633	-0.0878	-1.21	-1.37	0.3	-0.58	-0.162	-0.786	-1.25
2.04	-0.584	-1.83	-2.84	-0.863	-0.193	0.333	-0.0673	-2.36	1.31	-1.89	-0.117	0.918	-1.94	-1.88	-1.69	-0.794	-0.654	-0.483	-1.17	-1.64	0.153	-0.503	-0.122	-0.662	-1.73
1.57	-0.261	-1.91	-2.53	-0.93	0.0936	-0.979	0.212	-2.45	1.47	-0.145	-1.1	0.361	-2.01	-1.37	-1.83	-0.829	-0.598	-0.49	-1.28	-1.02	0.168	-0.29	-0.294	-0.789	-1.92
1.25	-0.673	-1.61	-2.31	-1.48	-0.811	-0.56	0.188	-1.95	2.44	-0.423	-1.38	0.456	-1.28	-2.3	-1.64	0.313	-0.431	-0.0211	-0.926	-0.335	0.0141	0.728	-0.367	-0.636	-1.6
0.923	-0.00379	-1.74	-2.46	-1.58	-0.882	-0.398	1.3	-2.12	1.86	-0.107	-1.27	-0.367	-1.95	-1.73	-1.84	0.416	-0.647	-0.578	-0.583	-2.13	-0.161	1.66	-0.705	-0.56	-1.31
0.899	-0.862	-1.75	-2.45	-1.55	0.63	0.274	0.693	-1.7	2.29	1.38	1.07	0.171	-2.69	-2.04	-1.95	-0.278	-0.757	-1.08	-0.897	-1.37	-0.0563	1.81	-0.6	-0.663	-1.07
0.841	-0.561	-1.69	-2.18	-1.86	0.638	-0.632	0.433	-2.42	2.44	0.385	0.414	0.511	-3.66	-1.86	-2.04	-0.254	-0.497	-0.429	-0.776	-0.564	-0.0483	1.93	-0.96	-0.441	-1.6
0.841	-0.202	-1.84	-2.04	-1.46	0.362	0.252	0.000949	-2	2.15	0.0491	-0.382	1.13	-3.71	-1.91	-1.92	-0.621	-0.257	-1.05	-1.52	-1.91	0.0846	1.91	-0.444	-0.777	-1.67
1.02	0.371	-1.57	-2.17	-1.85	0.328	0.107	0.837	-2.03	1.62	0.59	-0.69	1.17	-3.28	-0.889	-1.87	-0.682	-0.24	-0.878	-1.24	-1.27	-0.332	1.6	-0.518	-0.679	-1.94
0.881	-0.748	-1.8	-1.89	-2.04	0.242	-0.223	-0.193	-1.25	0.728	1.13	-1.38	0.255	-2.95	-1.06	-1.85	-0.654	-0.754	-1.47	-0.686	-1.88	-0.459	1.36	-0.287	-0.61	-2.2
0.855	-0.0182	-1.76	-1.57	-1.9	-0.124	-0.475	0.038	-1.43	0.564	-0.258	-1.6	-0.0992	-2.05	-1.3	-2.22	-0.388	-0.494	-1.44	-0.829	-1.62	-0.23	1.22	-0.584	-1.21	-1.9
1.25	0.23	-1.86	-1.34	-1.97	0.379	-0.0302	-0.751	-0.907	0.314	0.0557	-0.321	0.123	-2.07	-1.51	-2.27	0.304	-0.563	-0.2	-1.47	-2.76	-0.469	0.982	-0.78	-1.08	-1.74
0.922	-0.0847	-1.62	-1.87	-2.15	-0.323	0.47	0.154	-1.36	1.17	-0.796	0.315	-0.263	-2.6	-0.83	-2.2	0.119	-0.384	-0.156	-0.928	-1.18	-0.088	1.08	-0.643	-0.934	-1.64
1.36	0.686	-1.71	-2.11	-2.62	0.295	0.365	0.261	-1.68	1.36	-0.89	0.814	0.06	-1.35	-1.44	-1.93	-0.409	-0.555	-0.691	-0.208	-1.65	-0.475	1.15	-0.665	-1.04	-2.37
1.34	0.664	-1.88	-2	-2.97	-1.12	0.902	0.712	-1.77	2.31	-0.684	0.838	0.53	-1.73	-1.88	-2.27	-0.765	-0.586	-0.999	-0.904	-1.44	-0.166	1.12	-0.416	-1.4	-2.41
1.24	-0.607	-1.87	-1.93	-2.26	-0.314	0.55	-0.695	-2.13	1.59	0.416	0.339	0.0421	-3.66	-1.49	-2.35	-1.04	-0.187	-0.372	-1.09	-0.593	-0.458	1.57	-0.694	-1.25	-1.91
1.32	-0.881	-1.9	-2.55	-2.38	-0.374	0.111	1.08	-2.23	1.19	-0.0384	0.907	-0.234	-3.71	-1.61	-2.63	-1.36	-0.805	-1.16	-0.859	-1.61	-0.483	2.43	-1.01	-1.22	-1.93
0.93	-0.00363	-1.82	-2.77	-2.18	-0.21	-0.416	0.465	-2.39	2.51	-0.745	-0.626	0.232	-2.11	-0.661	-2.47	-0.925	-0.768	-1.69	-0.273	-0.996	-0.402	2.14	-1.01	-1.26	-2.57
0.761	1.77	-1.94	-2.47	-2.17	-0.24	0.0457	0.314	-2.69	3.31	-0.609	0.52	0.221	-2.16	-1.28	-2.29	-0.965	0.11	-1.65	-0.84	-1.13	-0.608	2.09	-0.945	-1.77	-1.92
0.363	2.53	-1.45	-2.31	-2.64	0.0119	-0.34	-0.907	-2.48	1.67	-0.135	-0.0821	-0.401	-2.19	-1.07	-2.1	-0.515	-0.15	-1.46	-1.16	-1.29	-0.573	2.07	-1.16	-1.22	-1.92
0.817	1.78	-1.66	-2.79	-2.81	0.295	0.066	0.358	-2.09	2.13	-0.259	2.32	-0.49	-1.81	-1.6	-2.52	-0.0594	-0.728	-2.05	-1.22	-0.982	-0.681	1.93	-0.87	-1.44	-1.94
0.359	0.757	-1.24	-2.03	-2.39	0.229	-1.18	-0.68	-2.86	1.5	0.958	1.15	-0.565	-1.96	-1.76	-2.49	0.107	-0.198	-1.15	-1.6	-1.55	-0.67	2.37	-0.955	-1.25	-1.66
0.142	0.14	-1.11	-2.12	-2.84	0.499	0.372	-1.59	-2.66	1.89	0.23	-0.302	-0.676	-1.02	-1.72	-2.38	-0.931	-0.378	-1.4	-1.27	-1.84	-0.93	2.27	-0.599	-1.39	-1.89
-0.0435	1.72	-1.17	-2.43	-3.19	0.946	0.404	0.619	-2.7	2.35	0.23	-1.8	-0.626	-0.7	-1.75	-2.48	-0.591	-0.505	-1.7	-0.728	-1.81	-0.822	2.27	-1.07	-1.56	-1.73
-0.211	-0.202	-1.11	-2.65	-2.86	0.763	-0.226	0.143	-2.45	2.22	-1.25	-1.29	-0.448	-1.25	-1.48	-2.55	-1.21	-1.03	-1.23	-1.18	-0.955	-0.984	2.11	-1.05	-2.17	-2.1
-0.268	1.03	-1.49	-2.21	-2.01	0.588	-0.865	-0.529	-1.51	2.46	-1.82	1.39	-0.681	-0.197	-1.25	-2.47	-0.122	-1.12	-1.24	-0.957	-0.613	-0.948	2.01	-1.23	-1.6	-1.81
-0.499	0.755	-1.61	-2.54	-2.34	-0.0249	-0.409	-0.551	-1.64	1.6	-0.752	1.02	-1.48	-0.734	-1.55	-2.86	-0.156	-1.33	-1.59	-0.375	-1.35	-0.91	1.9	-1.13	-1.53	-1.04
-0.247	0.245	-1.53	-2.85	-2.07	0.66	-0.122	-1.38	-1.47	1.51	0.151	1.32	-0.887	0.00459	-1.83	-2.5	-0.503	-1.07	-1.56	-0.59	-1.86	-1.18	1.77	-1.31	-1.59	-0.948
-0.244	-0.38	-1.58	-2.81	-2.38	0.378	0.00865	0.794	-1.73	1.67	0.331	-1.43	-0.758	-1.02	-1.82	-2.43	-0.524	-1.8	-1.78	0.307	-1.59	-1.01	1.74	-0.915	-1.62	-1.33
-0.546	-1.2	-1.69	-2.29	-2.74	0.0706	0.047	-0.872	-2.29	2.65	0.643	-1.21	-1.08	-2.27	-1.63	-2.72	0.747	-1.76	-1.5	-0.12	-1.58	-0.985	1.31	-0.774	-1.47	-0.399
-0.726	0.618	-1.59	-2.77	-2.66	0.111	-1.26	-1.11	-2.8	2.51	-0.191	-0.936	-1.72	-3.12	-1.19	-2.54	0.136	-1.64	-1.81	-0.296	-0.628	-0.894	1.45	-1.28	-1.76	-1.09
-0.939	-0.566	-1.56	-2.73	-3.33	-0.405	-1.16	-0.51	-3.25	3.37	-0.45	-0.766	-1.3	-3.35	-0.843	-2.6	1.09	-1.87	-1.68	-0.064	-1.07	-0.926	1.37	-1.46	-1.76	-0.965
-0.515	-0.55	-1.64	-3.03	-2.97	-0.75	-0.397	-1.22	-3.51	1.95	-1.79	0.279	-1.27	-3.32	-1.73	-2.42	-0.32	-0.963	-2.24	-0.0151	-0.812	-1.14	1.16	-1.38	-2.11	-0.673
-0.554	-0.676	-1.94	-2.95	-3.23	-1.15	-0.659	-0.463	-2.98	1.24	-0.677	-0.857	-1.2	-4.49	-2.12	-2.16	-0.468	-1.13	-1.4	0.465	-0.334	-1.08	1.23	-1.41	-1.65	-1.23
-0.325	0.11	-1.82	-2.49	-2.56	-1.25	-1.24	0.00624	-1.58	0.437	-0.732	-0.9	-1.1	-3.6	-1.99	-2.25	-1.16	-1.25	-0.925	0.51	-0.753	-1.24	0.8	-1.03	-1.38	-0.456
-0.529	-0.376	-1.98	-2.66	-2.33	-1.91	0.0628	-0.02	-0.939	1.63	0.232	0.0989	-1	-3.6	-1.8	-2.09	-0.379	-1.01	-1.53	0.365	-1.45	-1.27	1.1	-1.13	-1.3	-0.682
-0.589	0.325	-1.98	-2.17	-2.93	-1.31	-0.0508	0.929	-1.6	1.24	1.14	-0.136	-1.11	-2.85	-1.62	-2.27	1.21	-1.33	-1.48	0.347	-1.67	-1.12	1.48	-1	-1.48	-0.925
-0.525	-0.333	-2.05	-2.59	-2.75	-0.929	-1.03	1.04	-2.1	2.15	0.465	-0.82	-1.68	-3.74	-1.97	-1.87	0.792	-1.45	-2.42	-0.34	-1.12	-1.32	1.64	-0.892	-1.44	-1.27
-0.432	-0.149	-2.22	-2.59	-3	-0.84	-1.82	-0.414	-2.69	2.39	-1.18	-1.16	-1.95	-4.01	-2.24	-2.48	0.114	-1.38	-1.97	-0.14	-0.679	-1.26	1.05	-1.35	-1.36	-1.08
-0.451	-0.169	-2.21	-3.56	-2.84	-1.97	-1.51	-1.8	-2.68	1.99	-1.78	-1.22	-1.43	-3.54	-2.28	-1.84	0.329	-1.16	-2.6	0.323	-0.838	-1.24	0.884	-1.19	-1.15	-1.16
-0.432	-0.533	-2.32	-2.73	-2.72	-1.94	-1.92	-0.58	-2.29	0.78	-0.371	0.853	-1.6	-3.36	-1.98	-2.11	-0.706	-1.36	-2.38	0.0344	-1.31	-1.13	1.22	-1.11	-1.36	-1.51
-0.478	-0.318	-2.34	-3.08	-3.09	-1.48	-2	-0.309	-1.55	0.51	-0.18	0.327	-1.67	-3.07	-2.31	-2.66	-0.761	-1.43	-1.98	0.586	-1.03	-1.19	1.39	-1.39	-1.86	-1.33
-0.573	-0.754	-2.34	-2.52	-2.86	-1.07	-3.07	-0.769	-1.88	1.01	0.509	0.74	-2	-3.54	-2.6	-2.26	-0.385	-1.15	-1.63	0.304	-0.689	-1.08	1.34	-1.35	-1.93	-1.77
-0.515	-0.738	-2.69	-2.62	-3.28	-0.286	-2.5	-1.1	-1.72	1.25	-0.374	1.4	-2.36	-3.32	-2.34	-2.67	-0.705	-0.673	-2.14	0.839	-0.638	-1.21	0.792	-1.17	-1.49	-1
-0.534	-0.53	-3.17	-2.76	-2.92	-0.727	-1.75	-1.38	-1.36	1.27	1.67	0.409	-1.85	-2.72	-2.4	-2.92	-0.827	-0.673	-0.521	0.456	-1.12	-1.44	0.666	-1.03	-1.56	-1.99
-0.381	-1.02	-3.09	-2.92	-2.52	-0.811	-1.68	-2.13	-1.43	1.29	0.949	0.426	-2.08	-3.81	-2.14	-2.27	-0.815	-0.399	-0.22	1.38	-1.18	-1.33	0.206	-1	-1.78	-2.22
-0.496	-1.11	-3.14	-2.81	-2.68	-1.3	-2.48	-1.66	-2.19	1.92	-0.7	-0.266	-2.13	-3.7	-2.38	-2.28	-1.59	-0.535	-1.08	2.03	-0.927	-1.04	0.288	-0.921	-1.96	-1.52
-0.658	-0.823	-3.12	-2.46	-2.07	-0.784	-2.55	-2.71	-1.89	1.78	-1.11	-0.0518	-2.54	-2.21	-2.02	-2.29	-0.942	-0.839	-0.922	2.04	-1.35	-0.895	0.323	-0.627	-1.84	-1.18
-1.07	-0.992	-2.95	-2.3	-2.57	-0.877	-2.47	-0.863	-2	2.31	-0.794	-0.588	-2.05	-1.23	-2.29	-2.45	-0.254	-0.867	-0.941	2.11	-2.05	-1.12	0.332	-0.848	-1.89	-1.01
-1.09	-0.615	-2.55	-2.89	-2.68	-0.771	-1.91	-0.845	-2.15	0.973	-0.605	-0.732	-2.34	-1.34	-2.04	-2.26	-1.15	-1.11	-1.34	2.18	-0.291	-1.07	0.387	-0.691	-1.52	-1.72
-1.64	-0.707	-2.64	-2.23	-2.56	-0.608	-3.79	0.276	-1.79	1.62	-0.843	-0.493	-2	-1.4	-2.05	-1.83	-0.833	-1.33	-0.836	1.89	-1.67	-1.44	0.696	-0.901	-1.35	-1.31
-0.916	-0.586	-2.68	-2.34	-2.83	-0.0471	-2.39	0.317	-1.89	1.63	-1.08	-0.928	-1.15	-0.642	-2.23	-1.97	-0.892	-1.07	-0.234	1.84	-1.1	-1.18	0.174	-0.88	-1.13	-1.36
-0.611	-0.683	-2.59	-2.46	-3.15	-0.774	-2.71	-0.0364	-2.45	1.23	-0.318	-0.686	-1.98	-0.506	-2.32	-1.95	0.18	-1.02	-0.157	1.78	-1.65	-1.39	0.485	-0.873	-1.38	-1.03
-0.712	-1.27	-2.46	-2.75	-2.79	-1	-3.2	0.0114	-1.99	1.91	-0.424	-1.94	-3.02	-0.99	-2.67	-2.65	-0.198	-1.4	-0.0319	1.33	-1.25	-1.2	0.238	-0.82	-1.29	-1.14
-0.687	-1.01	-2.62	-3.41	-2.12	-1.16	-2.9	0.472	-2.16	1.71	0.616	-1.66	-1.93	-1.98	-2.33	-2.25	-1.18	-1.4	-0.336	1.26	-0.21	-1.22	0.433	-1.11	-1.14	-0.971
-0.794	-1.81	-2.65	-2.63	-2.49	-1.78	-2.3	-0.0824	-2.41	1.14	0.289	-0.19	-2.04	-2.8	-1.83	-1.64	-1.04	-1.12	-0.0224	0.822	-0.604	-1.1	0.384	-0.695	-1.49	-0.752
-1.29	-0.902	-2.43	-2.76	-1.99	-2.16	-2.84	-0.0267	-3.41	0.867	0.255	0.434	-1.62	-2.51	-2.13	-1.74	-0.168	-1.33	-0.83	0.0667	-1.84	-1.28	0.274	-0.897	-1.33	-0.495
-1.19	-0.932	-2.6	-3.18	-1.71	-2.62	-2.17	-1.4	-3.13	0.34	-0.667	0.732	-2.33	-2.46	-1.56	-2.16	-0.41	-1.43	-0.625	0.383	-1.39	-1.09	-0.045	-0.956	-1.83	-0.2
-0.808	-0.828	-2.57	-2.91	-1.85	-2.53	-3.38	-1.42	-3.1	0.432	-0.273	0.0531	-2.03	-3.36	-1.76	-1.92	-1.62	-1.43	-0.277	0.388	-1.13	-1.16	0.0981	-0.433	-1.56	-0.763
-0.787	-0.957	-2.67	-3.22	-1.88	-2.54	-2.37	-0.796	-3.42	0.0176	-1.02	-0.661	-2.26	-3.22	-1.5	-2.17	-0.666	-1.58	0.00399	0.086	-0.505	-1.4	0.228	-0.392	-1.5	-0.982
-0.794	-0.88	-2.77	-3.53	-2.63	-2.81	-3.04	-0.425	-3.05	0.735	-0.698	0.313	-2.41	-2.72	-1.97	-1.96	-1.19	-1.7	-1.07	0.00696	-2.25	-1.45	0.276	-0.404	-1.33	-0.67
-0.774	-0.607	-3.04	-3.5	-2.75	-3.46	-3.06	-0.778	-2.93	1.54	-0.0445	-0.169	-2.53	-2.19	-2.13	-2.03	-1.68	-1.56	-1.03	0.305	-1.95	-1.51	0.54	-0.396	-1.5	-0.472
-1.04	-0.509	-3.01	-3.54	-3.09	-3.5	-2.88	-1.22	-2.48	2	0.493	-0.359	-2.37	-2.17	-2.33	-2.19	-2.14	-1.55	-1.05	1.02	-1.03	-1.19	0.00664	-0.75	-1.41	0.253
-1.24	-0.921	-2.94	-3.47	-2.8	-3.8	-3.83	-1.85	-3.06	1.76	-0.298	-0.798	-2.72	-3.49	-2.55	-2.32	-1.49	-0.703	-1.89	0.0605	-0.535	-1.32	0.246	-0.423	-1.46	-0.85
-0.589	-0.422	-2.92	-3.39	-2.88	-3.37	-4.09	-1.15	-3.24	1.6	-0.655	-0.488	-2.86	-4.55	-2.81	-2.61	-1.93	-0.969	-1.53	1.11	-1.75	-1.2	-0.273	-0.636	-1.69	0.013
-0.974	-1.49	-2.69	-2.77	-3.68	-3.28	-3.86	-1.34	-2.93	0.575	-0.989	-1.36	-2.95	-4.58	-2.66	-1.68	-0.824	-0.748	-2.03	1.13	-0.914	-1.28	-0.174	-0.691	-1.46	-0.839
-0.846	-2.02	-2.93	-3.38	-3.27	-3.53	-4.34	-1.69	-2.75	0.88	-0.824	-1.49	-2.69	-4.61	-2.13	-2	-1.63	-0.837	-1.05	0.541	-1.12	-1.22	-0.0759	-1.1	-1.45	-0.654
-1.11	-0.88	-3.08	-3.65	-3.4	-3.33	-3.67	-2.5	-3.26	0.479	-0.874	-1.08	-2.36	-5.21	-2.55	-2.58	-1.79	-0.327	-1.37	1.08	-0.154	-1.41	0.0817	-1.01	-1.47	0.372
-1.01	-0.537	-2.89	-3.26	-3.57	-3.22	-3.93	-3.42	-3.46	0.853	-0.193	-1.04	-2.28	-3.6	-2.01	-2.35	-1.76	-0.543	-1.64	1.1	-1.23	-1.6	0.184	-1.05	-1.78	-0.41
-0.892	0.289	-2.91	-3.11	-3.38	-3.75	-3.32	-2.74	-3.25	-0.225	-0.86	-0.495	-2.16	-4.18	-2.21	-2.44	-2.18	-0.841	-1.35	0.411	-2.04	-1.7	0.0955	-0.99	-1.82	0.00308
-1.17	1.14	-2.72	-3.6	-3.53	-3.88	-4.03	-1.77	-3.39	-0.546	0.343	-1.59	-2.97	-4.74	-2.9	-2.46	-1.31	-1.09	-1.63	0.448	-1.19	-1.69	-0.183	-0.985	-1.61	-0.45
-0.955	1.39	-2.64	-3.17	-3.45	-3.92	-3.66	-1.24	-3.36	-0.0945	-0.393	0.911	-3.24	-3.89	-2.41	-2.26	-2.18	-1.61	-1.68	0.148	-1.34	-1.4	-0.0644	-0.877	-1.86	-0.0245
-1.08	0.349	-2.23	-3.41	-3.6	-3.93	-4.33	-2.67	-3.3	-0.68	-1.34	-0.0398	-2.58	-4.59	-3.1	-2.39	-1.51	-1.75	-1.88	-0.368	-1.15	-1.23	0.00533	-0.928	-1.83	-0.521
-0.948	0.614	-2.27	-2.74	-3.93	-3.4	-5.03	-2.37	-3.06	-1.56	-1.08	-1.04	-2.78	-4.01	-1.9	-2.27	-1.44	-1.51	-2.07	-0.238	-1.23	-1.22	-0.114	-1.18	-1.97	0.0108
-0.779	0.0568	-2.22	-2.78	-3.7	-4.31	-3.6	-2.51	-3.17	-1.4	-0.256	-1.1	-3.02	-4.29	-2.04	-2.19	-1.4	-1.15	-1.3	-0.396	-1.88	-1.49	-0.142	-1.18	-1.92	0.103
-0.695	-0.112	-2.46	-2.68	-4.27	-3.96	-4.13	-2.05	-3.08	-2.35	-0.674	-0.312	-3.75	-5.2	-2.56	-3.08	-1.27	-1.28	-1.81	-0.219	-1.86	-1.42	-0.201	-1.02	-1.87	-0.189
-0.736	0.388	-2.6	-3.09	-4.42	-3.73	-4.39	-1.47	-3.23	-2.48	-1.22	0.0778	-3.23	-3.88	-1.87	-2.53	-1.24	-1.38	-1.02	-0.178	-2.28	-1.36	-0.0724	-1.08	-1.9	-0.272
-0.843	0.0593	-2.69	-3.36	-4.36	-4.03	-4.04	-2.34	-3.6	-2.88	-0.579	0.255	-3.49	-3.82	-1.74	-2.51	-1.76	-1.39	-2.18	0.225	-1.63	-1.55	-0.134	-0.952	-1.75	0.294
-0.724	-0.292	-2.65	-3.02	-4.34	-4.2	-4.4	-1.62	-3.52	-1.77	-1.42	-0.764	-2.81	-3.93	-1.86	-2.58	-1.41	-1.21	-1.18	-0.248	-1.84	-1.68	-0.101	-1.26	-2.12	-0.18
-0.353	-0.967	-2.64	-2.96	-4.19	-4.09	-4.15	-0.724	-3.02	-2.94	-0.375	-0.313	-3.35	-3.79	-1.82	-2.57	-0.963	-1.44	-1.33	-0.0413	-1.43	-1.27	-0.323	-0.929	-2.03	-0.113
-0.0524	-1.1	-2.59	-3.22	-4.72	-4.43	-5.09	-2.23	-3.53	-2.29	-0.514	0.61	-2.95	-4.6	-2.04	-2.57	-0.623	-0.94	-1.73	-0.0348	-1.93	-1.15	-0.188	-1.02	-2.3	-0.16
-0.186	-0.654	-2.71	-3.71	-4.39	-3.73	-4.57	-2.3	-3.23	-2.34	-1.58	1.44	-3.4	-4.65	-2.74	-2.17	-1.26	-1.24	-1.48	-0.238	-1.99	-1.42	-0.139	-1.4	-2.01	-0.291
0.00676	-0.0987	-2.67	-3.25	-4.39	-4.13	-4.89	-2.58	-2.95	-2.22	-0.925	-1.01	-2.99	-5.06	-2.55	-2.03	-1.35	-0.793	-1.3	0.0322	-2.07	-1.27	-0.239	-1.35	-2.05	-0.219
-0.321	0.135	-2.87	-3.04	-4.1	-4.28	-4.31	-3	-3.24	-2.9	-0.764	0.0238	-3.27	-5.86	-2.53	-2.26	-1.54	-1.2	-1.48	-0.0156	-2.72	-1.4	-0.415	-1.5	-1.82	-0.965
-0.424	-0.171	-2.91	-3.01	-4.32	-4.04	-4.78	-1.27	-3.44	-1.46	-1.11	-0.307	-2.56	-5.23	-1.93	-2.69	-1.25	-1.24	-1.38	0.559	-2.65	-1.26	-0.124	-1.52	-1.96	-0.00994
-0.251	0.14	-2.76	-2.64	-4.42	-4.19	-4.39	-2.29	-3.07	-2.39	-2.12	-0.257	-3.93	-4.75	-2.09	-2.31	-1.48	-1	-2.26	1.32	-1.72	-1.29	-0.39	-1.36	-2.15	-0.169
-0.517	0.381	-2.84	-3.1	-4.55	-4.35	-4.66	-1.87	-3.28	-1.97	-1.13	0.285	-2.97	-5.08	-1.85	-2.1	-1.6	-0.77	-1.67	2.72	-1.84	-1.05	-0.0686	-1.61	-2.31	-0.303
-0.638	-0.822	-2.99	-3.24	-4.72	-4.23	-4.31	-2.39	-3.23	-1.05	-1.74	-0.106	-3.31	-4.72	-1.79	-2.5	-1.6	-0.434	-1.31	3.38	-1.68	-1.07	-0.304	-1.81	-2.25	-0.223
-1.01	0.00364	-2.99	-3.1	-4.46	-4.5	-4.56	-2.9	-3.13	-2.14	-0.64	0.347	-2.96	-5.45	-2.06	-2.66	-1.07	-1.07	-1.57	2.95	-2.36	-1.11	-0.331	-1.41	-2.08	-0.129
-1.1	-0.642	-3.04	-3.03	-4.17	-4.45	-4.61	-2.81	-3.04	-2.84	-1.31	-0.267	-3.68	-5.12	-2.19	-2.38	-1.22	-1.01	-0.442	3.52	-1.29	-1.24	-0.753	-1.53	-2.29	-0.541
-0.882	-0.401	-3.02	-2.86	-4.68	-4.03	-4.53	-1.8	-3.15	-2.1	-0.886	0.449	-2.87	-6.13	-2.04	-2.15	-1.84	-0.538	-1.07	3.4	-0.832	-1.03	-0.76	-1.46	-2.46	-1.39
-0.8	-0.864	-3.35	-3.1	-4.69	-4.28	-3.89	-1.88	-2.54	-3.13	-1.05	-0.308	-3.06	-6.38	-2.34	-2.51	-1.4	-0.544	-1.95	4.23	-0.528	-1.23	-0.478	-1.42	-2.56	-1.26
-0.822	-0.282	-3.14	-3.3	-4.81	-4.31	-4.08	-3.12	-3.06	-1.84	-2.09	0.26	-3.2	-6.26	-2.5	-2.26	-1.06	-1.32	-2.16	5.28	-1.67	-1.19	-0.649	-1.48	-2.3	-1.6
-0.906	-0.472	-3.31	-3.12	-4.44	-4.28	-4.57	-2.55	-3.26	-2.66	-2.19	0.884	-2.95	-5.43	-2.58	-1.71	-0.897	-1.08	-2.8	5.26	-2.79	-1.19	-0.411	-1.67	-2.34	-1.34
-0.553	-0.275	-3.3	-3.52	-4.62	-3.82	-4.45	-1.22	-3.01	-3.51	-0.326	-0.712	-3.62	-5.52	-2.1	-2.65	-1.04	-1.05	-1.62	4.94	-2.59	-1.15	-0.53	-1.35	-2.43	-1.9
-0.611	-0.541	-3.14	-3.31	-5.02	-3.75	-4.82	-2.18	-3.15	-2.59	-1.55	0.335	-3.79	-5.04	-1.93	-2.82	-1.09	-1.13	-2.58	4.53	-1.32	-1.44	-0.714	-0.936	-2.49	-2.66
-0.563	-0.87	-3.36	-3.26	-5.26	-4.16	-5.17	-3.49	-3.06	-2.99	-1.37	-0.0709	-3.1	-6.04	-2.12	-2.24	-0.888	-0.804	-2.43	4.03	-2.36	-1.55	-0.646	-1.26	-2.65	-2.04
-0.139	-0.597	-3.29	-3.42	-5	-4.23	-4.44	-2.88	-3.13	-2.69	-1.61	0.012	-3.37	-5	-2.15	-2.71	-1.41	-1.13	-2.45	3.87	-2.44	-1.39	-0.305	-1.23	-2.44	-2.19
-0.365	-0.597	-3.48	-3.38	-5.11	-4.22	-4.94	-2.48	-2.99	-3.34	-1.57	0.158	-3.7	-5.46	-2.15	-2.68	-2.11	-1.39	-2.39	3.59	-2.09	-1.28	-0.277	-1.23	-2.32	-1.79
-0.666	-0.855	-3.38	-3.41	-5.01	-4.37	-4.51	-1.89	-3.47	-3.08	-1.23	0.296	-3.21	-5.7	-2.28	-3.07	-1.13	-0.975	-1.9	3.19	-2.44	-1.58	-0.278	-1.6	-2.43	-1.32
-0.862	-0.837	-3.38	-3.37	-4.91	-4.38	-5.23	-3.8	-3.17	-3.86	-1.19	-1.14	-3.61	-5.26	-2.39	-2.7	-1.04	-1.32	-1.72	3.25	-2.65	-1.54	-0.262	-1.41	-2.48	-1.24
-0.515	-1.12	-3.37	-3.35	-5.28	-4.67	-5.96	-3.2	-3.05	-2.84	-0.939	-0.861	-3.48	-5.15	-2.29	-2.96	-0.814	-1.38	-2.09	3.28	-3.47	-1.56	-0.311	-1.4	-2.45	-1.55
-0.852	-0.821	-3.41	-3.7	-5.47	-4.89	-4.22	-2.79	-3.38	-3.82	-1.23	-1.12	-3.72	-6.35	-2.02	-2.75	-0.72	-1.28	-1.96	3.46	-3.28	-1.51	-0.169	-1.31	-2.42	-1.76
-0.708	-0.722	-3.46	-3.4	-5.08	-4.6	-5.24	-2.28	-3.2	-3.16	-1.14	-0.461	-3.29	-6.14	-2.2	-2.9	-0.62	-0.818	-2.57	3.28	-2.7	-1.55	-0.413	-1.38	-2.2	-1.31
-0.843	-1.81	-3.35	-3.97	-4.81	-4.75	-4.61	-2.14	-3.43	-2.83	-1.82	-0.28	-3.88	-6	-2.2	-2.61	-0.939	-1.19	-2.2	3.13	-1.98	-1.56	-0.442	-1.33	-2.03	-1.33
-0.913	-0.985	-3.4	-3.25	-4.96	-4.61	-4.97	-3.42	-2.82	-3.47	-1.3	1.3	-4.13	-5.74	-2.21	-2.34	-0.624	-0.916	-1.95	4.12	-1.96	-1.33	-0.667	-1.22	-2.23	-0.593
-1.06	-1.87	-3.61	-3.18	-5.05	-4.53	-5.15	-3.81	-2.93	-3.75	-1.59	-0.234	-3.37	-6.57	-2.81	-2.42	-0.87	-1.02	-1.19	4.99	-2.26	-1.47	-0.486	-1.51	-2.45	-0.166
-0.69	-0.985	-3.6	-3.2	-5.09	-4.67	-4.41	-4.19	-3.35	-3.22	-1.97	-0.707	-3.85	-5.35	-2.7	-2.64	-0.776	-1.01	-2.17	5.29	-1.39	-1.73	-0.158	-1.22	-2.18	0.273
-1.09	-0.791	-3.59	-3.38	-5.44	-5.46	-5.45	-3.13	-3.77	-3.37	-0.798	0.435	-3.69	-6.04	-2.28	-2.77	-1.18	-1.26	-2.15	5.02	-1.81	-1.37	-0.515	-1.19	-1.99	0.0926
-1.03	-2.17	-3.61	-3.33	-5.39	-5.06	-5.16	-3.35	-3.51	-3.82	-1.73	-0.667	-4.34	-5.86	-2.29	-2.69	-1.62	-1	-2.37	4.95	-1.72	-1.49	-0.631	-1.36	-2.32	-0.0362
-1.31	-1.4	-3.44	-3.39	-5.19	-4.73	-4.83	-2.61	-3.27	-3.4	-1.92	-0.362	-3.74	-6.4	-2.68	-2.59	-1.4	-0.872	-1.88	4.15	-1.58	-1.64	-0.676	-1.37	-2.09	-0.629
-1.09	-1.53	-3.58	-3.33	-5.83	-4.61	-4.8	-3.26	-3.27	-3.66	-0.477	-0.337	-3.9	-6.7	-2.81	-2.5	-0.7	-0.849	-2.02	4.43	-2.57	-1.36	-1.1	-1.32	-2.39	-0.412
-1.2	-1.82	-3.88	-4.05	-5.47	-4.83	-5.03	-2.74	-3.47	-3.16	-1.85	-0.849	-4.1	-6.8	-2.72	-2.63	-1.53	-1.15	-1.46	4.69	-2.27	-1.56	-0.733	-0.991	-2.23	-0.752
-1.18	-1.35	-3.75	-3.61	-5.91	-3.88	-5.44	-2.81	-4.02	-3.63	-0.307	-1.28	-3.84	-6.41	-2.65	-2.45	-2.4	-0.78	-2.08	5.38	-2.42	-1.63	-0.659	-1.65	-2.45	0.0545
-1.22	-1.58	-3.5	-3.14	-5.57	-5	-5.71	-3.19	-3.9	-2.52	-1	-0.704	-3.89	-6.17	-2.09	-2.39	-1.96	-1.19	-1.96	4.55	-2.07	-1.5	-0.678	-1.73	-2.18	-0.613
-1.41	-1.99	-3.61	-3.72	-5.66	-5.04	-5.27	-2.59	-4.04	-3.27	-1.45	-1.54	-3.82	-6.35	-1.88	-2.37	-2.36	-0.976	-1.89	4.8	-2.79	-1.41	-0.527	-1.38	-2.46	-0.739
-1.54	-1.41	-3.66	-3.32	-5.82	-5.2	-5.57	-3.8	-3.36	-4.25	-2.15	-1.34	-4.67	-5.87	-2.85	-2.54	-1.78	-0.807	-2.04	3.63	-3.38	-1.53	-0.886	-1.58	-2.09	-0.746
-1.72	-1.05	-3.8	-3.13	-5.61	-4.83	-5.87	-2.77	-3.67	-3.83	-1.65	0.0473	-4.73	-6.41	-2.77	-2.67	-2.1	-0.745	-2.98	3.51	-2.48	-1.52	-0.908	-1.62	-2.38	-1.7
-1.77	-0.949	-3.83	-3.23	-5.51	-4.8	-5.34	-2.86	-3.04	-3.64	-0.106	-0.788	-3.85	-6.82	-2.39	-2.69	-1.59	-0.769	-1.1	4.33	-1.95	-1.59	-0.527	-1.57	-2.29	-0.969
-1.51	-0.837	-3.74	-3.43	-5.54	-5.05	-5.12	-1.88	-3.57	-3.48	-0.828	-1.56	-3.57	-6.71	-2.49	-3.05	-1.4	-1.22	-1.96	4.01	-2.18	-1.63	-0.903	-1.5	-2.39	-1.2
-1.53	-0.664	-3.74	-3.47	-5.57	-5.22	-4.28	-3.34	-3.5	-3.43	-1.51	-0.977	-3.72	-6.8	-2.84	-2.75	-1.74	-0.903	-1.57	3.99	-1.44	-1.47	-1.14	-1.74	-2.27	-1.57
-1.31	-1.2	-3.73	-3.3	-5.53	-4.87	-5.39	-3.45	-3.22	-2.74	-0.913	-0.772	-4.35	-6.3	-2.57	-2.62	-1.36	-1.61	-1.81	3.44	-1.65	-1.42	-1.2	-1.95	-2.62	-0.38
-1.28	-1.37	-3.67	-2.81	-5.7	-5.41	-5.27	-2.86	-2.57	-3.34	-2.19	-1.23	-4.35	-7.22	-2.64	-3.13	-1.68	-1.37	-1.64	4.21	-2	-1.26	-0.926	-1.87	-2.56	-1.37
-1.47	-0.791	-3.8	-3.29	-5.85	-5.03	-5.21	-2.91	-2.12	-3.01	-0.901	-1.46	-4.21	-7.13	-2.63	-2.9	-1.14	-1.2	-2.7	3.15	-1.57	-0.741	-1.17	-1.7	-2.37	-2.02
-1.32	-1.8	-3.82	-3.15	-5.96	-5.93	-5.24	-3.42	-2.28	-3.39	-1.25	-1.49	-3.44	-7.34	-2.98	-2.77	-1.29	-1.27	-2.5	3.3	-2.82	-0.719	-1.05	-1.68	-2.59	-2
-1.55	-1.48	-3.86	-3.32	-5.7	-4.95	-5.69	-3.18	-2.53	-3.33	-1.29	-0.922	-3.62	-7.44	-2.17	-3.28	-1.48	-0.915	-2.14	2.71	-1.97	-0.779	-0.977	-1.43	-2.36	-2.16
-1.32	-1.5	-3.72	-3.03	-5.95	-5.38	-5.42	-2.32	-2.39	-2.39	-1.82	-0.781	-3.25	-7.13	-2.08	-3.01	-1.68	-1.14	-2.22	2.24	-1.88	-1.08	-1.11	-1.6	-2.58	-1.34
-1.35	-1.18	-3.77	-3.36	-5.69	-5.31	-5.61	-3.14	-2.81	-3.17	-1.12	-0.14	-4.37	-7.46	-2.64	-2.37	-1.41	-0.998	-2.11	1.93	-2.05	-0.98	-1.23	-1.66	-2.77	0.408
-1.41	-1.67	-3.85	-3.27	-5.84	-5.47	-5.53	-3.95	-2.88	-3.28	-0.733	0.231	-3.66	-7.07	-2.52	-2.57	-1.37	-1.25	-2.25	1.65	-3.24	-1.09	-1.07	-1.81	-2.68	0.0488
-1.63	-2.38	-3.94	-3.41	-6.06	-5.38	-5.76	-3.17	-2.59	-3.2	-0.818	-1.54	-3.52	-7.39	-2.3	-2.39	-1.24	-1.16	-3.03	1.13	-1.82	-0.99	-0.841	-1.6	-2.76	0.107
-1.57	-1.8	-4.06	-3.22	-6.08	-5.28	-4.95	-3.15	-2.56	-4.08	-1.18	-0.774	-4.08	-6.81	-2.33	-2.49	-1.74	-1.14	-2.08	1.26	-2.04	-1.08	-1.13	-1.62	-2.77	-0.332
-1.8	-1.51	-3.94	-3.45	-6.16	-5.1	-5	-3.52	-1.71	-3.42	-1.96	-2.03	-3.81	-7.6	-2.53	-2.74	-0.938	-1.14	-2.23	1.37	-2.93	-0.915	-1.13	-1.6	-2.64	-0.385
-1.98	-2.2	-4.07	-3.53	-5.92	-5.47	-4.98	-3.23	-0.556	-3.29	-1.43	-0.855	-4.3	-7.66	-2.81	-2.31	-1.97	-1.32	-2.69	1.48	-3.01	-0.96	-1.05	-1.82	-2.58	-1.71
-1.78	-1.96	-4.06	-3.47	-5.97	-5.31	-3.96	-3.31	-0.715	-3.17	-0.924	-0.978	-4.17	-7.44	-2.79	-2.2	-1.25	-1.5	-1.69	1.97	-2.84	-1.06	-1.01	-1.85	-2.84	-1.8
-1.83	-2.62	-4.11	-3.54	-5.44	-5.81	-4.57	-3.17	-1.14	-3.7	-0.833	-1.26	-4.5	-7.46	-2.94	-2.45	-1.72	-0.772	-1.7	1.11	-2.2	-1.29	-1.09	-1.82	-2.53	-1.15
-2.06	-1.78	-4.15	-2.64	-5.56	-5.67	-5.76	-2.97	-0.958	-4.15	-0.585	-1.03	-4.59	-7.49	-2.43	-2.75	-2.04	-1.55	-2.3	1.48	-3.35	-1.08	-1.4	-1.99	-2.79	-1.3
-2.28	-1.07	-3.99	-2.56	-5.53	-5.58	-5.38	-3.05	-1.48	-3.37	-1.67	-0.758	-3.68	-7.22	-2.73	-2.45	-1.13	-1.36	-2.92	1.36	-3.48	-1.21	-1.58	-2.1	-2.76	-0.838
-2.09	-1.44	-4.01	-3.39	-5.64	-5.95	-4.24	-3.36	-1.91	-3.95	-1.46	-2.5	-4.43	-7.32	-2.74	-3.04	-1.29	-1.68	-2.33	1.21	-1.76	-1.22	-1.51	-1.91	-2.8	-1.14
-2.08	-1.31	-4.19	-3.33	-5.66	-5.93	-4.62	-3.91	-2.04	-4.46	-1.4	-0.976	-4.19	-7.54	-2.59	-3.04	-1.04	-1.25	-2.42	0.877	-2.16	-1.24	-1.76	-2.12	-2.68	-1.66
-1.99	-2.78	-4.17	-2.8	-5.47	-6.07	-4.67	-3.65	-2.14	-4.48	-0.26	-0.934	-5.04	-7.99	-2.49	-2.15	-1.99	-1.31	-2.45	1.14	-1.87	-1.45	-2.13	-2.02	-2.85	-1.53
-2.08	-1.59	-4.22	-2.55	-5.47	-5.99	-4.57	-4	-2.49	-4.5	-1.01	-1.23	-4.85	-7.83	-2.28	-2.51	-1.49	-1.34	-2.37	1.11	-1.89	-1.52	-1.54	-2.26	-2.8	-1.75
-1.96	-1.45	-4.19	-2.2	-5.53	-5.97	-5.19	-3.64	-2.31	-4.78	-1.8	-1.57	-4.46	-7.14	-2.56	-2.42	-2.17	-0.777	-2.07	0.689	-2.44	-1.58	-1.6	-2.37	-2.81	-1.42
-2.11	-1.84	-4.16	-2.89	-5.82	-6.07	-5.06	-4.25	-1.97	-3.81	-0.962	-0.678	-4.41	-7.9	-2.45	-2.55	-1.4	-0.487	-2.26	0.438	-2.17	-1.23	-1.72	-2.26	-2.3	-1.01
-1.95	-2.02	-4.27	-2.36	-5.77	-6.17	-5.27	-3.1	-2.4	-2.95	-2.5	-0.223	-4.35	-7.55	-2.81	-2.74	-1.88	-1.05	-2.4	0.673	-2.36	-1.37	-1.77	-2.12	-2.55	-0.951
-2.15	-1.96	-4.37	-2.87	-5.6	-6.11	-5.61	-2.79	-2.06	-4.52	-1.91	-1.34	-4.02	-7.92	-2.96	-2.67	-2.35	-0.897	-2	-0.00397	-1.45	-1.28	-1.63	-2.21	-2.74	-1.31
-2.17	-1.54	-4.28	-2.57	-5.88	-6.08	-4.43	-3.47	-2.61	-3.9	-2.18	-0.668	-3.96	-7.86	-2.87	-2.69	-1.44	-1.09	-1.97	0.438	-2.03	-1.62	-1.72	-1.87	-2.8	-2.19
-2.22	-1.87	-4.16	-2.25	-5.73	-6.21	-5.49	-3.8	-2.48	-3.71	-1.34	-1.27	-4.32	-7.84	-2.8	-2.78	-1.69	-0.731	-2.03	0.581	-1.94	-1.45	-1.9	-2.08	-3.04	-1.78
-2.31	-1.84	-4.23	-2.67	-5.92	-6.16	-6.08	-3.07	-2.27	-4.83	-1.47	0.427	-4.7	-7.64	-2.81	-3.11	-1.84	-1.39	-1.39	0.4	-1.97	-1.33	-1.88	-2.01	-2.8	-1.76
-2.11	-1.66	-4.26	-2.53	-5.65	-6.43	-5.05	-2.9	-2.32	-4.54	0.101	0.223	-4.46	-7.72	-2.99	-2.44	-1.83	-0.905	-1.96	-0.0741	-1.91	-1.42	-1.65	-2.13	-2.96	-1.32
-2.55	-1.88	-4.19	-2.63	-5.92	-6.77	-5.2	-3.53	-2.67	-4.04	-1.38	-0.552	-4.03	-7.44	-2.52	-2.46	-1.61	-1.38	-2.52	0.316	-1.08	-1.1	-1.58	-2.02	-2.68	-1.68
-2.34	-2.52	-4.24	-2.51	-5.97	-6.22	-5	-2.59	-2.32	-4.75	-1.15	-1.68	-4.24	-8.11	-2.55	-2.6	-1.25	-1.26	-2.46	0.154	-1.2	-1.19	-1.66	-2.33	-2.92	-1.8
-2.54	-2.24	-4.3	-2.95	-5.95	-6.71	-4.96	-4.11	-2.44	-4.74	-1.18	-1.36	-4.24	-7.35	-2.75	-2.61	-1.08	-1.3	-2.15	0.789	-1.53	-0.886	-1.53	-2.19	-2.95	-1.94
-2.52	-2.12	-4.12	-2.68	-6.15	-6.71	-5.24	-3.17	-2.56	-4.03	-1.57	-1.86	-4.31	-7.72	-2.67	-2.65	-0.933	-1.08	-2.53	1.17	-2.95	-0.87	-1.86	-2.21	-2.9	-1.99
-2.5	-0.946	-4.3	-2.8	-6	-6.54	-5.46	-3.4	-2.61	-5.11	-1.97	-1.02	-4.78	-8.01	-2.9	-3.28	-1.59	-1.16	-1.59	0.891	-1.54	-0.886	-2.17	-2.01	-2.97	-2.38
-2.27	-1.18	-4.41	-2.93	-6.18	-6.69	-5.15	-4.17	-2.14	-5.29	-1.7	-0.374	-5.18	-8.56	-2.05	-2.99	-1.63	-1.72	-1.19	0.853	-2.1	-0.911	-1.95	-1.92	-3.08	-2.76
-2.56	-1.57	-4.26	-3.79	-6.06	-6	-4.7	-3.18	-2.63	-4.33	-2.1	-0.000328	-4.7	-8.15	-2.39	-2.77	-1.84	-1.13	-1.89	1.52	-1.86	-1.2	-2	-2.06	-3.07	-1.64
-2.39	-1.74	-4.31	-3.46	-6.22	-6.42	-5.36	-4.07	-2.51	-4.38	-0.31	-2.29	-4.59	-8.42	-2.35	-2.58	-1.52	-1.33	-1.57	0.874	-2.2	-1.05	-1.7	-2.1	-2.97	-1.06
-2.42	-0.0336	-4.34	-3.79	-5.79	-6.24	-5.12	-3.03	-2.76	-4.42	-0.5	-3.02	-5.02	-8.72	-2.87	-2.14	-1.29	-1.21	-1.94	1.65	-2.27	-1.1	-1.72	-2.19	-2.9	-1.51
-2.44	-1	-4.34	-3.51	-5.87	-6.31	-5.82	-3.01	-2.82	-4	-0.223	-1.72	-5.06	-8.86	-2.92	-2.93	-0.914	-1.31	-1.43	1.63	-3.22	-1.15	-2.02	-2.19	-2.51	-1.55
-2	-1.62	-4.26	-2.88	-5.82	-6.1	-4.7	-4.08	-3.3	-4.17	-1.14	-2.24	-4.77	-8.33	-2.95	-2.6	-0.7	-1.06	-1.57	0.807	-2.8	-1.14	-2.42	-2.08	-2.85	-1.16
-1.88	-1.59	-4.34	-3.05	-5.85	-6.28	-4.71	-3.87	-3.31	-3.53	-0.666	-0.981	-4.45	-8.74	-3.05	-2.72	-1.41	-1.63	-1.42	1.76	-1.31	-1.16	-2.06	-1.66	-2.88	-1.75
-1.53	-1.2	-4.48	-2.99	-5.92	-6.26	-5.12	-3.86	-3.23	-5.92	-1.52	-1.39	-4.18	-8.49	-2.4	-2.43	-1.24	-1.22	-1.1	2.61	-2.15	-1.11	-2.35	-1.49	-2.76	-1.14
-1.64	-1.2	-4.38	-3.19	-6.14	-6.3	-5.28	-3.4	-2.89	-4.43	-1.22	-1.1	-5.17	-7.87	-3.23	-2.39	-1.36	-0.785	-1.48	2.57	-1.23	-1.27	-2	-1.33	-2.73	-1.79
-1.31	-1.61	-4.08	-2.9	-5.56	-6.47	-5.26	-3.04	-3.08	-5.29	-1.33	-1.8	-4.29	-7.56	-3.51	-2.73	-0.699	-0.859	-2.67	2.62	-1.32	-1.3	-2.22	-1.43	-2.89	-1.55
-1.82	-1.65	-4.41	-3.13	-5.31	-6.61	-5.55	-2.8	-3.18	-5.15	-1.37	-1.52	-4.64	-7.73	-3.01	-2.42	-1.24	-1.08	-2.1	1.9	-1.29	-1.36	-1.99	-1.64	-3.01	-1.84
-1.61	-2.22	-4.24	-3.16	-4.95	-6.73	-5.63	-3.56	-2.97	-5.53	-0.633	-0.926	-4.62	-8.03	-3.38	-2.72	-1.2	-1.1	-1.67	2.15	-2.09	-1.21	-2.09	-1.49	-2.89	-1.85
-1.76	-2.02	-4.26	-2.96	-5.01	-6.6	-5.36	-4.07	-3.21	-5.43	-1.34	-2.09	-4.68	-7.87	-3.3	-2.59	-0.832	-1.15	-2.2	2.08	-2.21	-1.4	-2.13	-1.97	-2.92	-2.34
-1.98	-1.54	-4.25	-2.92	-5.37	-6.61	-5.59	-4.13	-3.29	-5.43	-0.49	-1.49	-4.08	-7.97	-2.67	-2.67	-1.68	-0.71	-1.45	2.41	-2.18	-1.37	-2.4	-1.86	-2.62	-2.12
-1.91	-0.938	-4.26	-3.29	-5.16	-7.03	-5.25	-3.7	-3.13	-5.21	-1.71	-2.25	-4.75	-7.76	-3.26	-2.6	-0.834	-0.979	-2.15	2.37	-2.65	-1.55	-2.77	-1.68	-2.88	-2.1
-1.97	-1.58	-4.4	-3.3	-5.45	-7	-5.09	-3.85	-2.84	-4.78	-1.28	-2.23	-5	-7.08	-3.1	-2.47	-1.78	-1.06	-2.71	2.41	-2.72	-1.5	-2.27	-1.48	-3.03	-2.22
-1.78	-2.23	-4.5	-3.38	-5.62	-7.15	-6.07	-3.27	-3.03	-5.07	-1.47	-0.966	-5.03	-7.63	-2.99	-2.89	-1.34	-1.11	-2.07	2.05	-1.95	-1.45	-2.23	-1.85	-2.84	-1.93
-1.7	-1.96	-4.4	-2.94	-5.41	-6.97	-4.67	-3.35	-3.58	-5.27	-2.1	-1.04	-4.46	-7.89	-2.99	-2.65	-0.981	-1.38	-2.43	2.47	-2.59	-1.46	-2.06	-1.78	-2.78	-2
-1.92	-1.44	-4.51	-2.81	-5.43	-6.79	-5.13	-2.81	-3.26	-5.83	-0.895	-2.28	-4.29	-8.01	-3.01	-3.19	-1.76	-1.33	-1.84	2.13	-1.85	-1.57	-1.72	-2.1	-2.92	-1.84
-1.94	-1.92	-4.37	-3.23	-5.56	-6.8	-4.95	-3.37	-3.19	-4.97	-1.5	-0.455	-4.45	-8.29	-3.18	-2.83	-1.95	-1.2	-2.71	1.84	-2.77	-1.75	-1.6	-1.9	-3.03	-1.71
-1.98	-1.89	-4.29	-3.63	-5.55	-6.79	-5.3	-3.86	-3.52	-5.12	-3.42	-2.21	-4.83	-8.59	-2.86	-3.13	-2.08	-1.46	-2.28	1.34	-1.51	-1.5	-1.95	-2.26	-2.76	-1.71
-2.28	-1.71	-4.29	-3.27	-5.68	-7.06	-4.96	-3.14	-3.18	-6.27	-0.864	-1.9	-4.46	-8	-3.23	-2.66	-1.74	-1.22	-2.24	1.7	-3.02	-1.51	-0.713	-2.21	-2.74	-2.83
-2.47	-1.85	-4.39	-3.47	-5.9	-7.02	-5.05	-3.02	-3.34	-4.84	-1.64	-2.66	-4.22	-8.21	-2.81	-2.69	-1.97	-1.25	-1.8	1.57	-2.36	-1.75	-0.444	-2.17	-2.63	-2.44
-2.02	-1.55	-4.58	-3.16	-5.88	-6.78	-5.34	-3.33	-3.7	-4.86	-1.26	0.0428	-4.43	-7.71	-3.05	-2.91	-2.02	-1.4	-2.02	1.14	-2.16	-1.79	-0.325	-1.97	-2.71	-1.28
-1.72	-1.89	-4.24	-3.68	-5.83	-7.18	-5.2	-3.17	-3.17	-4.98	-1.4	0.337	-5.26	-8.84	-2.67	-2.97	-2.53	-1.68	-2.06	1.97	-1.42	-1.72	-0.188	-2.13	-3.02	-1.03
-2	-1.73	-4.34	-3.33	-6.09	-7.15	-4.75	-3.55	-3.74	-5.47	-1.33	-2.59	-4.69	-8.14	-2.47	-3.1	-2.19	-1.59	-1.9	1.89	-2.27	-1.51	-0.223	-2.2	-3.24	-1.97
-2.21	-1.74	-4.45	-3.62	-5.95	-6.87	-4.44	-3.45	-4.06	-6.52	-1.75	-1	-5.25	-8.51	-2.56	-2.9	-1.93	-1.19	-2.16	1.3	-2.3	-1.48	-0.346	-1.98	-2.97	-2.05
-2.21	-0.656	-4.39	-4.49	-5.7	-6.81	-5.97	-3.7	-3.55	-5.5	-0.619	-2.45	-5.25	-7.41	-2.84	-2.65	-1.47	-0.796	-2.13	1.55	-2.73	-1.93	-0.685	-2.35	-3.33	-1.89
-2.3	-1.01	-4.54	-3.63	-6.06	-6.87	-5.38	-3.71	-3.33	-5.19	0.107	-2.12	-4.56	-8.37	-2.84	-2.57	-2.45	-1.06	-2.3	1.57	-1.9	-1.58	-0.565	-2.16	-3.33	-1.38
-1.85	-0.126	-4.56	-4.16	-5.91	-7.33	-6.22	-4.48	-3.83	-5.11	-1.03	-1.99	-4.64	-8.46	-3.37	-3.09	-1.99	-0.941	-2.1	1.94	-2.22	-1.75	-1.16	-2.14	-3.14	-2.1
-2.08	-1.8	-4.33	-3.83	-6.13	-7.09	-4.34	-4.61	-3.72	-5.31	-1.41	-0.876	-5.25	-8.72	-2.53	-2.92	-1.52	-0.646	-2.03	2.27	-2.17	-1.61	-1.15	-2.01	-3.37	-2.52
-2.17	-1.61	-4.61	-3.78	-5.85	-6.88	-4.49	-3.16	-3.61	-4.87	-1.18	-2.11	-5.28	-8.34	-2.61	-3.39	-1.17	-1	-1.56	1.65	-2.71	-1.79	-1.25	-1.96	-3.18	-1.09
-2.14	-0.856	-4.51	-3.99	-5.87	-7.06	-5.83	-2.56	-3.54	-5.13	-0.823	-2.34	-4.81	-8.54	-2.53	-3.15	-1.05	-1.15	-1.63	1.12	-1.59	-1.99	-0.867	-2.16	-3.36	-1.3
-2.19	-2.18	-4.28	-4.09	-5.93	-7.45	-5.73	-3.93	-3.3	-6.83	-1.3	-0.863	-4.93	-8.63	-2.63	-2.94	-1.42	-1.19	-1.22	0.137	-1.49	-1.81	-1.46	-2.29	-3.29	-0.956
-2.26	-1.49	-4.48	-3.33	-5.58	-6.95	-4.58	-4.25	-3.51	-5.53	-1.76	-0.88	-4.32	-8.46	-2.7	-2.93	-1.97	-1.44	-2.39	0.0433	-2.67	-2	-1.26	-2.18	-3.29	-2.13
-2.42	-2.02	-4.5	-3.54	-5.79	-7.46	-4.97	-3.35	-3.56	-5.82	-1.58	-2.09	-4.92	-8.39	-3.12	-2.72	-2.05	-1.33	-1.57	0.547	-2.48	-1.67	-1.12	-2.09	-3.42	-1.6
-2.41	-1.34	-4.52	-3.9	-6.3	-7.22	-5.08	-4.37	-3.4	-5.98	-1.28	-0.948	-4.6	-8.18	-2.96	-2.82	-1.66	-1.65	-1.34	1.56	-2.6	-1.76	-1.54	-2.22	-3.32	-1.37
-2.3	-1.92	-4.31	-3.75	-5.86	-7.09	-6.14	-3.54	-3.27	-6	-0.93	-1.56	-5.32	-8.29	-3	-2.77	-1.54	-1.14	-1.86	0.756	-1.77	-1.71	-1.32	-2.22	-3.35	-1.63
-2.45	-1.54	-4.36	-3.19	-6.19	-6.84	-5.84	-3.98	-3.24	-5.64	-1.96	-1.1	-4.45	-8.31	-3.12	-2.94	-2.58	-1.11	-1.76	0.204	-2.08	-1.59	-1.32	-2.39	-3.14	-2.2
-2.2	-1.27	-4.64	-3.93	-6.14	-6.95	-4.63	-4.65	-2.78	-5.73	-1.25	-1.79	-5.15	-8.42	-2.87	-2.42	-1.9	-1.28	-1.92	0.104	-2.66	-1.49	-1.31	-2.3	-3.06	-2.35
-2.44	-1.62	-4.72	-3.33	-5.98	-6.39	-5.14	-3.57	-2.64	-6.13	-2.21	-1.89	-4.94	-8.46	-2.9	-2.42	-1.55	-1.33	-2.31	-0.233	-2.6	-1.64	-0.974	-2.32	-3.04	-1.77
-2.05	-1.67	-4.57	-3.66	-6	-7.32	-4.98	-4.27	-3.43	-5.86	-1.78	-2.53	-4.48	-7.79	-2.58	-2.12	-1.87	-1.24	-2.02	0.168	-3.01	-1.54	-1.44	-2.17	-3.02	-1.39
-2.5	-1.7	-4.43	-4.24	-5.78	-6.42	-4.95	-4.32	-2.87	-6.21	-0.858	-2.34	-4.95	-8.97	-2.59	-2.35	-1.41	-1.52	-2.45	0.372	-2.72	-1.37	-1.13	-2.15	-2.78	-1.48
-2.06	-1.18	-4.61	-3.96	-6.02	-7.41	-4.33	-3.68	-3.31	-5.59	-2.56	-1.39	-4.27	-8.67	-2.88	-2.96	-2.49	-1.29	-2.15	0.517	-2.83	-1.56	-1.08	-2.07	-2.77	-1.82
-1.97	-1.35	-4.41	-4.08	-6.01	-7.25	-3.87	-3.61	-3.69	-6.05	-2.02	-2.96	-4.45	-8.75	-2.67	-2.07	-1.75	-1.67	-2.02	1.09	-2.14	-1.59	-1.3	-2.51	-2.75	-2.62
-2.29	-1.33	-4.48	-4.01	-6.12	-6.28	-5.32	-2.97	-3.27	-5.94	-1.45	-1.3	-5.69	-8.12	-3.28	-1.93	-0.959	-1.44	-2.14	1.73	-1.97	-1.62	-1.44	-2.39	-2.85	-2.15
-2.43	-2.28	-4.54	-4.27	-5.98	-6.46	-5.58	-4.57	-3.81	-5.51	-2.35	-2.59	-4.69	-8.7	-2.99	-1.74	-2.3	-1.52	-2.41	0.811	-2.03	-1.62	-1.53	-2.47	-3.04	-1.65
-2.12	-2.23	-4.43	-3.23	-6.28	-6	-5.63	-3.78	-3.52	-5.3	-2.37	-1.78	-4.93	-8.1	-2.63	-2.83	-1.85	-1.32	-2.62	0.682	-2.08	-1.53	-1.52	-2.56	-2.91	-1.38
-2.36	-1.8	-4.68	-3.1	-6.16	-6.72	-5.3	-3.54	-3.33	-5.02	-2.32	-1.37	-5.06	-8.54	-1.99	-2.52	-1.19	-1.14	-1.65	0.304	-2.24	-1.59	-1.16	-2.38	-2.93	-1.25
-2.31	-2.95	-4.71	-3.78	-5.94	-6.4	-4.98	-3.76	-3.69	-5.05	-2.4	-2.14	-5.28	-8.86	-1.42	-2.77	-2.11	-1.56	-2.28	0.0689	-1.71	-1.65	-1.2	-2.43	-2.89	-1.49
-2.23	-2.82	-4.63	-3.63	-6.17	-6.27	-5.67	-3.52	-3.67	-5.97	-1.28	-1.49	-5.41	-8.66	-1.25	-2.53	-2.1	-1.23	-2.59	-0.457	-1.9	-1.56	-1.65	-2.54	-2.96	-1.46
-2.27	-2.16	-4.73	-3.6	-6.59	-5.98	-5.07	-4.37	-3.39	-5.81	-2	-1.73	-4.66	-8.47	-1.59	-2.15	-2.41	-1.34	-2.71	-0.132	-1.81	-1.72	-1.59	-2.2	-2.64	-2.08
-2.45	-1.79	-4.69	-3.69	-6.02	-6.02	-5.4	-4.09	-3.5	-5.9	-2.03	-1.93	-5.33	-8.61	-1.84	-2.16	-1.85	-0.909	-1.75	0.421	-1.65	-1.64	-1.71	-2.63	-2.84	-1.59
-2.49	-1.92	-4.56	-4.16	-6.3	-6.47	-4.88	-4.2	-3.06	-5.82	-2.32	-1.12	-5.06	-7.74	-2.25	-2.56	-0.336	-1.29	-2.55	0.572	-2.23	-1.6	-1.88	-2.44	-2.59	-1.67
-2.28	-1.25	-4.15	-3.65	-6.39	-6.57	-5.19	-3.55	-3.01	-5.02	-2.17	-0.969	-4.93	-7.89	-2.09	-2.88	-0.517	-1.37	-2.26	-0.0213	-2.86	-1.72	-2.11	-2.44	-2.85	-1.83
-2.46	-1.67	-4.26	-3.63	-6.4	-6.56	-4.21	-4.08	-3.58	-5.2	-2.16	-1.36	-4.54	-7.85	-1.94	-2.54	-1.55	-1.35	-1.54	0.375	-2.86	-1.53	-1.62	-2.53	-2.97	-1.62
-2.64	-1.71	-4.08	-3.28	-6.39	-6.27	-4.81	-3.87	-3.91	-5.76	-1.22	-2	-5.37	-8.59	-2.24	-2.07	-0.492	-1.26	-1.93	0.67	-2.54	-1.71	-1.59	-2.31	-3.09	-0.789
-2.46	-1.29	-4.19	-3.12	-6.53	-6.83	-4.09	-3.63	-3.63	-6.37	-2.3	-3.14	-4.84	-8.26	-2.59	-2.58	-0.574	-1.15	-1.98	0.531	-1.9	-1.54	-1.67	-2.37	-2.87	-0.365
-2.33	-1.91	-4.03	-3.17	-6.87	-6.53	-5.7	-4.35	-3.23	-5.43	-0.56	-2.7	-4.89	-8.31	-2.13	-2.15	-1.04	-1.27	-1.68	0.112	-1.03	-1.63	-1.92	-2.59	-2.74	-1.16
-2.28	-1.8	-4	-3.74	-6.6	-6.83	-4.69	-3.16	-3.14	-5.47	-1.71	-1.71	-4.79	-8.47	-2.52	-2.12	-0.599	-1.32	-1.06	1.16	-1.28	-1.5	-1.65	-2.54	-3.04	-1.51
-2.82	-2.24	-4.07	-3.85	-6.67	-6.19	-5.5	-3.33	-3.38	-6.3	-2.95	-1.27	-5.48	-8.63	-2.38	-1.85	-0.993	-1.58	-2.18	0.499	-1.09	-1.64	-1.74	-2.68	-2.93	-1.4
-2.71	-1.47	-4.09	-3.61	-6.69	-6.77	-5.26	-3.37	-3.36	-6.8	-2.58	-1.83	-4.95	-8.47	-2.28	-2.05	-0.661	-1.57	-1.42	0.531	-0.482	-1.49	-1.49	-2.71	-2.75	-0.893
-2.76	-1.02	-4.1	-3.49	-6.63	-6.43	-5.95	-2.89	-3.02	-6.36	-1.99	-2	-4.62	-8.63	-2.08	-2.07	-0.668	-1.3	-1.06	0.117	-0.696	-1.36	-1.13	-2.56	-2.73	-0.782
-2.62	-0.179	-4.22	-3.36	-6.41	-6.75	-5.71	-3.05	-2.76	-6.34	-2.38	-2.19	-5.49	-8.01	-2.68	-2.01	-1.19	-1.64	-1.55	0.459	-0.206	-1.61	-1.14	-2.54	-2.92	-2.58
-2.53	-0.508	-4.13	-4.06	-6.23	-6.62	-5.3	-3.68	-3.03	-6.7	-1.64	-0.904	-4.79	-8.62	-2.23	-2.11	-1.32	-1.29	-2.42	-0.457	-1.46	-1.33	-1.12	-2.63	-3.64	-1.05
-2.62	-0.47	-4	-3.64	-6.16	-6.25	-4.77	-3.48	-2.96	-6.71	-1.14	-2.29	-4.97	-8.36	-2.59	-2.56	-0.941	-1.29	-2.04	-0.156	-1.37	-1.64	-1.17	-2.57	-3.43	-1.53
-2.82	0.0172	-3.7	-3.35	-6.34	-6.17	-6.14	-4.7	-3.47	-6.28	-1.53	-2.57	-4.98	-8.16	-2.51	-2.53	-1.08	-1.15	-2.59	-0.326	-1.9	-1.43	-1.68	-2.6	-3.09	-1.57
-2.41	-1.08	-3.94	-3.63	-6.4	-6.19	-4.69	-4.12	-2.46	-6.34	-1.63	-1.69	-4.83	-7.55	-2.64	-2.33	-0.863	-1.16	-2.24	-0.0303	-2.59	-1.56	-1.68	-2.98	-3.08	-1.56
-2.61	-0.923	-4	-3.31	-6.34	-6.34	-4.73	-3.93	-2.74	-6.98	-2.03	-2.34	-4.65	-8.44	-2.67	-2.65	-0.658	-1.34	-2.04	-0.338	-2.48	-1.67	-1.68	-3.03	-3.07	-0.772
-2.79	-0.913	-3.98	-3.47	-6.31	-6.64	-4.66	-3.95	-2.59	-6.33	-2.19	-1.41	-4.97	-8.36	-2.56	-2.92	-1.57	-1.22	-2.32	0.0331	-0.844	-1.81	-1.91	-2.49	-3.36	-0.989
-2.81	-0.994	-3.89	-3.52	-6.49	-6.75	-5.01	-3.85	-2.94	-7.19	-1.65	-2.07	-4.53	-7.73	-2.46	-2.42	-0.958	-1.09	-2.21	0.0518	-1.23	-1.71	-1.99	-2.22	-3.07	-1.62
-2.4	-1.79	-3.92	-3.67	-6.11	-6.92	-5.64	-4.61	-2.72	-7.1	-1.39	-2.01	-4.83	-8.64	-2.52	-2.15	-1.41	-0.676	-1.73	0.298	-2.55	-1.85	-1.28	-2.16	-3.04	-1.93
-2.64	-1.22	-4.22	-3.97	-6.08	-6.85	-5.66	-4.05	-2.8	-7.69	-0.985	-0.322	-5.59	-8.07	-2.75	-2.7	-1.83	-0.738	-1.5	0.248	-2.35	-1.76	-2.02	-2.51	-3.48	-1.69
-2.59	-1.4	-3.95	-3.79	-5.76	-6.65	-5.65	-4.72	-2.42	-7.42	-3.2	-2.67	-5.21	-8.33	-3.02	-2.41	-1.74	-0.433	-1.68	-0.205	-1.36	-1.86	-1.74	-2.63	-3.06	-1.37
-2.61	-0.807	-4.13	-3.39	-5.52	-6.8	-5.55	-4.6	-2.47	-6.82	-3.39	-1.33	-4.98	-8	-2.92	-2.34	-1.39	-0.963	-2.25	0.248	-1.76	-1.71	-1.98	-2.53	-3.21	-2.54
-2.65	-1.57	-4.2	-3.15	-5.87	-6.61	-4.99	-4.61	-3.08	-7.27	-2.1	-2.23	-4.52	-8.35	-2.37	-2.67	-0.594	-0.657	-1.94	-0.575	-1.89	-1.95	-2.1	-2.51	-3.07	-2.55
-3.01	-2.04	-4.02	-3.52	-5.87	-6.62	-4.76	-3.9	-3.08	-6.42	-2.18	-1.86	-5.26	-8.16	-2.38	-3.03	-1.34	-0.209	-1.5	-0.979	-2.18	-1.86	-2.55	-2.57	-3.09	-2.28
-3.03	-1.37	-3.69	-3.11	-5.99	-6.91	-5.17	-4.03	-2.89	-6.03	-2.17	-1.56	-5.59	-8.48	-2.45	-2.07	-0.878	0.378	-1.77	-1	-1.6	-2.06	-2.54	-2.61	-3.25	-1.72
-2.63	-1.19	-3.27	-3.32	-6.05	-6.31	-5.15	-4.14	-2.79	-6.84	-2.32	-0.956	-5.31	-8.91	-2.71	-2.48	-0.665	0.084	-2.47	-0.969	-0.431	-1.97	-2.34	-2.23	-2.76	-1.38
-2.61	-1.63	-3.14	-3.58	-6.14	-6.61	-5.05	-3.59	-3.22	-7.48	-2.59	-0.903	-5.18	-8.89	-2.72	-2.35	-0.685	-0.214	-1.82	-0.266	-2.33	-1.88	-2.06	-2.58	-2.91	-2.06
-2.94	-2.12	-3.22	-3.01	-5.93	-6.53	-5.5	-4.22	-3.31	-6.72	-2.09	-1.97	-4.75	-9.04	-3.06	-2.5	-0.905	-0.597	-1.46	-0.565	-1.5	-1.99	-2.13	-2.24	-2.98	-1.81
-2.66	-2.08	-3.27	-3.4	-6.22	-6.77	-5.66	-4.09	-3.75	-6.95	-1.86	-1.15	-4.86	-8.73	-2.97	-2.59	-0.0572	-0.659	-1.93	-0.113	-2.04	-1.92	-2.01	-2.4	-3.4	-1.67
-2.62	-1.38	-3.38	-3.2	-5.77	-6.31	-4.84	-3.33	-3.39	-7.59	-3.35	-2.53	-4.73	-8.87	-3.23	-2.88	-0.456	-0.715	-1.92	0.203	-2.26	-1.76	-2.22	-2.58	-3.1	-2.26
-2.73	-2.04	-3.55	-3.02	-6.09	-6.6	-3.67	-3.96	-3.64	-8.02	-2.16	-1.87	-5.63	-8.82	-2.94	-2.95	-0.513	-0.604	-1.31	0.929	-1.13	-2.08	-2.47	-2.29	-3.55	-2.12
-2.91	-1.71	-3.48	-2.96	-6.37	-6.25	-4.37	-4.25	-3.57	-7.42	-1.5	-2.61	-5.67	-8.47	-3.19	-2.45	-0.715	-0.862	-1.08	1.06	-1.38	-2.07	-2.45	-2.43	-3.06	-1.93
-3.02	-1.16	-3.37	-3.1	-6.1	-6.56	-4.98	-3.24	-2.97	-7.41	-2.22	-2.17	-5.4	-8.52	-2.33	-2.81	-0.461	-0.408	-1.26	1.23	-1.55	-2.08	-2.13	-2.56	-3.37	-2.25
-3.17	-1.15	-3.64	-2.21	-6.48	-6.71	-5.2	-3.83	-3.51	-6.84	-1.19	-1.52	-5.59	-8.93	-2.88	-2.78	-1.25	0.00712	-1.26	1.26	-1.12	-2.07	-1.94	-2.42	-3.07	-2.74
-2.92	-1.42	-3.42	-2.84	-6.54	-6.6	-5.13	-4.49	-3.3	-7.54	-1.44	-2.37	-5.47	-8.35	-2.65	-2.81	-0.538	-0.689	-0.865	0.804	-2.13	-1.89	-2.26	-2.37	-3	-1.85
-2.98	-1.85	-3.64	-2.91	-6.21	-6.69	-5.81	-4.68	-3.97	-6.66	-1.8	-1.62	-5.06	-8.51	-3.18	-2.62	-1.42	-0.493	-0.504	0.594	-1.49	-1.95	-2.13	-2.67	-3.04	-2.19
-2.75	-1.47	-3.79	-3.44	-5.92	-6.06	-5.19	-4.13	-3.92	-6.6	-1.79	-1.98	-5.29	-8.39	-2.93	-2.89	-1.2	-0.286	-1.39	0.783	-2.63	-2.25	-2.29	-2.9	-3.52	-2.14
-2.67	-1.85	-3.7	-3.32	-6.43	-6.6	-5.4	-3.34	-3.97	-6.88	-0.671	-1.44	-4.49	-8.65	-2.71	-3.52	-0.896	-0.666	-1.64	0.422	-2.32	-2.09	-1.95	-2.77	-3.45	-1.91
-2.65	-0.706	-3.71	-3.43	-6.28	-6.68	-4.34	-3.98	-3.67	-7.58	-1.35	-2.2	-4.74	-8.2	-2.95	-3.05	-1.2	-0.969	-2.13	-0.296	-2.44	-2.11	-1.61	-2.71	-3.38	-1.12
-2.87	-0.697	-3.7	-3.66	-6.43	-6.57	-3.95	-3.72	-3.83	-6.77	-2.26	-1.45	-5.21	-8.01	-2.76	-3.66	-1.18	-0.759	-2.34	0.0319	-4.2	-2.33	-1.92	-2.61	-3.51	-1.7
-2.64	-1.55	-3.8	-3.42	-6.11	-6.42	-4.57	-3.36	-3.35	-6.54	-2.4	-1.6	-5.72	-8.22	-2.4	-2.87	-0.858	-0.769	-1.75	-0.456	-3.39	-2.1	-2.02	-2.56	-3.28	-2
-2.8	-1.83	-3.58	-3.32	-5.84	-6.43	-5.25	-4.13	-3.56	-6.72	-2.45	-1.74	-4.94	-8.68	-3.12	-2.97	-1.84	-0.892	-2.41	-0.218	-2.55	-2.15	-1.78	-2.57	-3.33	-2.28
-2.74	-1.8	-3.64	-3.34	-5.98	-7.21	-5.19	-4.3	-3.36	-7.42	-0.959	-2.49	-5.19	-8.78	-3.42	-3.25	-1.23	-1.01	-1.69	0.192	-1.97	-2.24	-2.17	-2.78	-3.64	-1.85
-2.64	-1.18	-3.72	-3.66	-6.01	-6.47	-5.11	-4.1	-3.93	-7.81	-2.51	-1.12	-4.62	-8.02	-3.6	-2.9	-2.26	-1.26	-2.21	1.23	-2.42	-2.57	-1.95	-2.82	-3.44	-1.15
-2.73	-1.6	-3.64	-3.54	-5.77	-6.98	-4.99	-4.33	-4.04	-7.58	-1.57	-2.15	-5.28	-8.91	-2.99	-3.04	-1.11	-1.27	-2.52	0.94	-1.57	-2.41	-2.29	-2.83	-3.11	-2.61
-2.81	-1.94	-3.89	-3.9	-6.09	-6.94	-4.99	-3.55	-3.67	-6.88	-1.86	-1.53	-5.2	-8.73	-3.06	-3.05	-1.14	-1.26	-2.47	0.484	-2.6	-2.32	-2.11	-2.63	-3.81	-2.71
-3.02	-1.84	-4	-3.82	-5.83	-6.61	-3.89	-4.22	-3.58	-6.64	-1.63	-1.36	-5.56	-9.34	-2.64	-3.2	-0.37	-1.41	-2.69	1.03	-3.01	-2.05	-2.43	-2.53	-3.55	-1.83
-3.01	-1.26	-4.07	-3.78	-5.9	-6.72	-4.62	-4.63	-3.75	-6.36	-1.78	-2.52	-5.11	-8.33	-2.91	-3.27	-0.629	-1.52	-2.81	0.957	-1.92	-2.01	-2.25	-2.73	-3.82	-2.54
-2.94	-2.08	-3.9	-3.96	-6.36	-6.68	-5.26	-4.11	-3.04	-6.55	-1.34	-0.629	-4.55	-8.55	-2.57	-2.84	-0.664	-0.862	-2.79	0.576	-2.12	-1.97	-2.44	-2.74	-3.74	-2.53
-3.11	-1.53	-4.05	-3.17	-6.47	-6.99	-4.69	-4.22	-2.38	-6.72	-2.16	-1.97	-4.95	-9.1	-2.95	-2.78	-0.75	-0.827	-2.5	-0.802	-2.55	-2.02	-2.75	-2.65	-3.77	-3.37
-3.08	-1.12	-3.94	-3.52	-6.48	-7.17	-4.42	-3.65	-2.82	-6.79	-2.24	-1.6	-5.55	-8.56	-2.68	-2.68	-0.612	-1.36	-3.17	0.0555	-2.02	-2.25	-2.48	-2.99	-3.5	-2.39
-2.9	-1.07	-4.23	-2.97	-6.3	-6.38	-5.02	-4.97	-2.81	-6.84	-2.61	-2.4	-5.78	-8.66	-2.96	-2.83	-0.927	-0.906	-2.29	-0.555	-2.24	-2.24	-2.34	-2.92	-3.73	-1.93
-3.14	-0.856	-3.97	-3.67	-6.3	-6.72	-4.78	-4.09	-3.13	-6.13	-1.95	-0.71	-5.49	-8.43	-3.08	-3.25	-0.715	-1	-2.13	-0.896	-2.26	-2.15	-2.63	-2.94	-3.93	-1.47
-3.19	0.24	-4.11	-3.85	-6.06	-6.38	-3.76	-4.7	-2.74	-7.33	-1.73	-1.82	-5.27	-9.27	-2.66	-2.94	-1.09	-0.806	-2.62	0.0824	-1.14	-2.18	-2.52	-2.66	-3.58	-2.2
-3.1	-0.624	-3.89	-3.31	-6.12	-6.59	-4.66	-4.29	-2.7	-7.07	-2.43	-0.649	-5.69	-8.7	-2.78	-3.09	-0.818	-0.378	-2.6	0.0772	-1.69	-1.95	-2.69	-2.53	-3.98	-1.96
-3.16	-1.05	-3.96	-3.63	-5.96	-6.29	-4.54	-4.76	-2.93	-6.27	-1.91	-1.38	-5.51	-8.86	-2.67	-2.87	-0.863	-0.68	-2.39	0.194	-2.65	-2.24	-2.41	-2.81	-3.84	-2.06
-3.26	-1.91	-4.02	-3.51	-6.11	-6.93	-5.7	-4.51	-2.96	-6.06	-1.71	-1.98	-5.11	-8.69	-2.7	-3	-1.25	-1.01	-2.07	0.82	-2.28	-2.48	-2.64	-2.79	-3.79	-2.2
-3.15	-1.76	-3.89	-3.67	-6.1	-6.45	-5.3	-4.25	-2.67	-6.67	-0.0761	-2.81	-4.95	-8.59	-2.76	-2.78	-1.44	-1.21	-2.53	0.919	-3.34	-2.47	-2.51	-2.68	-3.7	-1.86
-3.06	-1.57	-3.95	-3.35	-6.35	-5.88	-5.72	-3.44	-2.08	-6.79	-1.77	-1.53	-5.22	-7.24	-3.16	-2.29	-1.72	-1.01	-1.79	0.482	-2.36	-2.38	-2.76	-2.74	-3.6	-1.95
-3.04	-2.19	-3.84	-3.08	-6.15	-5.63	-5.22	-4.26	-2.14	-7	-1.99	-0.872	-5.53	-6.86	-2.78	-2.28	-0.801	-0.943	-1.78	0.823	-2.58	-2.35	-2.64	-2.33	-3.75	-2.87
-3.06	-0.917	-4.03	-3.22	-6.25	-6.04	-5.69	-3.98	-2.21	-6.49	-0.748	-1.38	-5.16	-7.64	-2.65	-2.85	-1.1	-0.91	-1.89	0.837	-3.36	-2.64	-2.33	-2.88	-3.57	-2.54
-2.97	-1.75	-4.2	-3.61	-6.08	-6.76	-5.08	-4.79	-2.23	-6.19	-1.94	-1.77	-5.25	-7.66	-2.6	-2.25	-1.2	-1.23	-1.79	0.575	-2.26	-2.64	-2.33	-2.56	-3.68	-2.18
-2.77	-1.52	-4.07	-3.92	-6.5	-6.54	-5.36	-4.66	-2.44	-6.72	-0.843	-2.36	-4.85	-8.29	-2.72	-2.32	-2.22	-1.32	-1.48	0.617	-2.16	-2.49	-2.33	-2.59	-3.43	-2.35
-3.06	-1.15	-4.15	-3.68	-6.37	-6	-5.97	-4.22	-2.74	-7.06	-2.29	-2.04	-4.91	-7.68	-2.59	-2.1	-1.61	-1.31	-2.21	0.53	-2.93	-2.6	-2.4	-2.91	-3.4	-2.51
-3.01	-1.29	-4.21	-3.76	-5.86	-6.65	-6.02	-3.94	-2.49	-7.37	-1.77	-2.07	-5.1	-8.49	-2.5	-2.45	-1.73	-1.15	-2.03	1.03	-2.52	-2.86	-2.29	-2.74	-3.65	-1.75
-3.22	-0.763	-4.13	-3.22	-6.21	-6.5	-5.25	-3.63	-2.85	-5.98	-1.71	-3.29	-5.77	-8.36	-2.84	-2.73	-1.25	-1.28	-2.2	1.07	-2.99	-2.81	-2.16	-3.03	-3.4	-2.19
-3.35	-1.03	-4.24	-3.02	-6.02	-7.04	-5.81	-3.32	-3.39	-6.77	-2.11	-1.8	-5.4	-7.86	-2.71	-2.39	-1.82	-1.2	-1.84	0.607	-2.32	-2.44	-2.27	-2.94	-3.05	-1.52
-3.07	-0.594	-4.18	-2.75	-6.28	-6.93	-5.08	-3.85	-3.28	-7.3	-0.751	-1.27	-5.74	-8.07	-2.63	-2.87	-0.925	-0.777	-2.05	0.378	-1.77	-2.07	-2.08	-2.48	-3.23	-1.66
-3.23	-0.931	-4.26	-3.89	-6.3	-6.97	-5.75	-3.56	-3.47	-6.67	-0.949	-1.59	-4.91	-9.28	-2.28	-2.29	-1.38	-0.856	-1.4	0.82	-2.09	-2	-1.92	-2.3	-3.07	-1.03
-3.23	-1.93	-4.15	-3.84	-6.43	-6.95	-6.39	-4.31	-2.89	-6.67	-1.16	-3.26	-4.85	-9.09	-2.03	-2.59	-1.21	-0.896	-2.84	0.785	-2.74	-2.05	-1.97	-2.21	-3.25	-1.56
-3.47	-1.16	-4.3	-3.74	-6.74	-7.08	-6.08	-4.62	-3.08	-6.88	-1.29	-2.21	-5.42	-8.93	-1.78	-2.62	-1.16	-0.994	-2.43	1.32	-1.79	-2.08	-2.29	-2.8	-3.23	-1.52
-3.22	-1.27	-4.52	-3.85	-6.65	-6.61	-5.81	-5.08	-2.57	-6.27	-1.63	-1.58	-5.22	-8.8	-2.12	-2.69	-0.725	-0.404	-2.82	0.603	-2.44	-2.03	-2.48	-2.69	-3.25	-2.39
-3.58	-0.552	-4.6	-4.27	-6.81	-6.72	-6.3	-4.66	-2.85	-6.85	-1.01	-1.92	-5.66	-9.15	-2.44	-2.77	-0.116	-0.587	-1.84	1.42	-2.05	-1.94	-2.41	-2.59	-3.75	-1.49
-3.2	-0.969	-4.47	-4.17	-6.24	-7.19	-5.33	-4.38	-2.69	-7.16	-1.7	-1.4	-5.4	-8.37	-1.57	-3.01	-0.981	-1.24	-2.75	0.756	-2.48	-1.9	-2.11	-2.38	-3.21	-1.06
-3.18	-0.68	-4.4	-3.73	-6.4	-6.89	-5.69	-3.77	-2.5	-7.41	-1.98	-1.16	-5.4	-8.4	-1.92	-2.85	-0.142	-0.689	-3.3	0.407	-3.17	-1.87	-2.03	-2.67	-3.57	-1
-2.89	-0.928	-4.6	-4.01	-6	-7.05	-5.98	-4.5	-2.1	-7.59	-0.86	-1.7	-4.81	-8.13	-2.45	-2.73	-0.962	-0.607	-3.09	0.606	-2.06	-1.79	-2.02	-2.3	-3.43	-1.89
-2.96	-1.19	-4.29	-3.92	-6.07	-7.24	-6.12	-2.85	-2.76	-7.39	-1.05	-2.46	-5.17	-8.69	-2.2	-2.86	-1.45	-0.77	-2.83	0.843	-2.2	-1.65	-1.86	-2.42	-3.78	-1.48
-2.59	-1.14	-4.27	-4.07	-6.31	-7	-4.76	-4.32	-2.98	-6.72	-1.75	-1.37	-5.39	-8.84	-2.59	-3.11	-1.61	-0.662	-2.4	0.7	-1.86	-1.22	-1.74	-2.57	-4.04	-1.79
-2.72	-1.21	-4.28	-3.61	-6.13	-6.46	-4.89	-4.1	-2.64	-7.19	-2.58	-0.519	-5.38	-8.42	-2.91	-2.54	-1.11	-0.743	-2.64	1.15	-1.92	-1.17	-2.05	-2.34	-3.73	-1.64
-3.01	-0.79	-4.12	-3.27	-5.82	-7.04	-5.12	-4.32	-2.04	-7.52	-2.5	-1.94	-5.37	-7.72	-2.35	-2.49	-1.03	-0.879	-2.83	1.32	-2.26	-1.15	-1.84	-2.52	-3.71	-1.9
-2.68	-1.32	-4.13	-3.69	-6.02	-6.62	-4.71	-4.88	-2.27	-6.42	-1.64	-2.74	-5.31	-8.04	-2.74	-2.47	-1.83	-0.959	-3.03	1.24	-2.91	-1.16	-2.26	-2.9	-3.34	-1.86
-2.9	-1.27	-4.24	-2.9	-5.95	-7.38	-5.78	-4.22	-2.86	-6.51	-1.7	-2.28	-5.47	-9.17	-2.91	-2.98	-1.79	-1.18	-1.57	0.386	-2.88	-1.41	-2.64	-2.82	-3.25	-1.49
-2.9	-0.673	-4.27	-3.63	-6.02	-7.26	-5.09	-3.74	-3.19	-5.72	-0.463	-2.78	-5.04	-8.55	-2.7	-2.46	-1.18	-0.726	-1.91	-0.0773	-2.59	-1.35	-2.09	-3.07	-3.57	-2.18
-3.52	-0.941	-4.27	-3.78	-6.26	-6.97	-4.87	-4.59	-2.97	-6.48	-1.92	-2.9	-4.6	-9.11	-3.46	-2.77	-1.69	-1.16	-3.13	-0.716	-3.56	-1.3	-2.09	-2.39	-3.84	-2.44
-3.09	-1.74	-4.39	-3.33	-6.49	-7.53	-3.53	-4.21	-3.26	-6.86	-0.778	-0.895	-5.32	-9.81	-3.74	-2.92	-2.06	-1.05	-2.83	-0.0716	-2.5	-1.68	-2.19	-2.49	-3.74	-2.57
-3.26	-1.8	-4.5	-3.71	-6.47	-8.12	-4.08	-4.26	-3.21	-7.21	-2.3	-0.717	-5.74	-9	-2.85	-3.1	-2.39	-1.12	-1.41	-0.312	-2.39	-1.64	-2.07	-2.95	-3.59	-2.54
-3.33	-1.86	-4.42	-3.19	-6.21	-7.67	-4.54	-4.59	-2.73	-7.24	-2.65	-1.76	-5.26	-7.87	-3.05	-2.99	-1.62	-1.02	-2.27	-0.356	-2.72	-1.56	-2.02	-2.7	-3.52	-1.68
-3.15	-2.38	-4.72	-3.77	-6.27	-7.51	-4.56	-4.21	-2.95	-6.72	-1.86	-1.36	-5.95	-8.32	-3.49	-2.53	-1.85	-1.07	-1.95	-0.517	-3.21	-1.77	-1.89	-3.09	-3.89	-1.77
-3.21	-2.64	-4.59	-3.83	-6.54	-7.14	-3.76	-4.49	-2.68	-7.63	-2.51	-2.18	-5.97	-8.87	-2.93	-2.2	-2.1	-1.41	-2.35	-0.224	-3.2	-1.98	-1.33	-2.86	-3.46	-2.03
-3.03	-1.68	-4.76	-2.83	-6.33	-7.32	-3.81	-3.99	-3.04	-6.59	-2.91	-1.23	-5.99	-9.17	-3.07	-2.35	-2.03	-0.717	-2.19	-1.02	-2.19	-1.88	0.527	-2.75	-3.44	-2.43
-3.37	-1.19	-4.63	-2.96	-6.17	-7.94	-4.55	-3.93	-3.39	-7.11	-1.77	-2.24	-5.48	-8.15	-3.17	-2.3	-1.83	-0.676	-1.75	-0.505	-2	-1.84	-0.0441	-2.61	-3.56	-1.95
-3.04	-1.48	-4.58	-3.26	-6.2	-7.61	-5.02	-4.02	-2.77	-6.71	-1.11	-2.12	-5.15	-9.07	-3.49	-2.48	-2.55	-1.22	-1.67	0.124	-2.6	-1.87	0.296	-2.65	-3.67	-1.27
-2.81	-2.26	-4.56	-2.77	-6.9	-7.89	-4.91	-3.63	-2.8	-7.61	-1.88	-1.44	-5.11	-8.58	-2.87	-2.2	-2.11	-1.22	-2.12	0.103	-2.91	-1.88	-0.259	-2.93	-3.41	-1.62
-2.4	-1.73	-4.67	-3.57	-6.61	-6.95	-3.96	-4.91	-2.77	-7.72	-1.48	-1.38	-4.54	-9.45	-3.82	-2.63	-2	-1.05	-0.964	1.32	-3.7	-1.59	-0.442	-2.85	-3.58	-1.28
-2.62	-1.3	-4.58	-3.45	-6.37	-7.71	-4.52	-4.89	-2.59	-7.38	-1.2	-2.22	-4.89	-9.39	-3.32	-2.83	-1.6	-1.5	-1.21	1.02	-4.53	-1.63	-0.448	-2.62	-3.67	-2.27
-2.87	-0.612	-4.55	-3.52	-6.51	-7.22	-3.92	-4.71	-3.29	-6.46	-3.1	-2.94	-5.18	-9.57	-3.24	-2.7	-1.99	-1.1	-0.692	0.991	-2.77	-1.7	-0.468	-2.63	-3.56	-2.35
-2.31	-1.27	-4.61	-3.65	-6.75	-7.62	-4.16	-4.67	-2.33	-7.14	-1.77	-2.43	-5.47	-9.19	-3.02	-2.17	-1.23	-0.749	-1.28	0.493	-3.75	-1.75	-0.86	-2.9	-3.7	-2.03
-2.48	-1.49	-4.6	-3.17	-6.65	-7.49	-4.55	-5.08	-2.62	-7.11	-2.04	-3.08	-5.32	-8.55	-2.74	-3.02	-0.292	-1.21	-1.45	0.206	-3.2	-1.63	-0.491	-2.64	-3.96	-2.01
-2.64	-2.2	-4.44	-3.6	-6.7	-7.57	-5.01	-5.31	-2.62	-6.52	-2.02	-2.19	-5.79	-7.92	-2.99	-3.3	-0.106	-1.61	-2.01	-0.00374	-2.89	-1.88	-0.622	-2.85	-4.05	-1.48
-2.52	-2.78	-4.45	-3.37	-6.97	-7.76	-5.89	-4.42	-3.7	-6.54	-2.36	-2	-5.06	-8.14	-2.96	-2.71	-0.922	-1.37	-1.8	-0.00653	-3.43	-1.81	-0.639	-2.85	-4.37	-1.77
-2.83	-3.3	-4.25	-3.13	-6.77	-7.46	-5.03	-4.15	-3.12	-7.23	-3.1	-2.8	-4.67	-8.82	-3.45	-2.63	-1.26	-1.45	-2.15	-0.211	-3.29	-1.83	-0.888	-2.87	-4.08	-2.09
-2.77	-2.62	-4.44	-3.22	-6.23	-7.56	-4.47	-4.13	-2.71	-6.71	-1.54	-2.75	-4.89	-8.85	-3.14	-2.9	-1.42	-1.02	-2.17	-1.09	-3.61	-1.95	-1.52	-2.86	-4.16	-1.76
-3.23	-2.67	-4.18	-2.88	-6.51	-7.73	-4.46	-4.63	-2.62	-7.68	-1.64	-1.84	-4.95	-9.33	-2.86	-2.43	-2.44	-1.15	-1.76	-0.657	-2.9	-1.89	-1.41	-2.97	-4	-2.15
-2.95	-2.13	-4.68	-2.75	-6.62	-7.32	-4.89	-4.23	-2.41	-6.95	-1.66	-2.14	-4.4	-8.7	-2.89	-2.99	-1.34	-1.12	-2.12	-0.458	-1.75	-1.62	-1.53	-3.14	-3.97	-1.38
-3.08	-1.59	-4.63	-2.86	-6.49	-7.55	-3.9	-4.2	-2.72	-7.93	-1.21	-2.26	-5.14	-9.44	-3.05	-2.63	-2.01	-0.98	-2.33	-0.276	-2.34	-1.66	-1.45	-3.02	-4.17	-2.29
-3.15	-1.23	-4.56	-3.11	-6.07	-7.19	-3.9	-3.59	-2.71	-7.4	-0.653	-1.78	-4.89	-9.6	-3.01	-2.12	-1.82	-1.45	-2.2	-0.0762	-1.52	-1.64	-1.31	-3.09	-3.86	-2.37
-3.06	-2.09	-4.69	-2.42	-6.05	-7.89	-4.29	-4.44	-2.28	-6.94	-0.967	-1.23	-5.11	-9.06	-2.88	-2.81	-2.01	-0.991	-2.28	0.121	-0.734	-1.67	-1.38	-2.91	-3.26	-2.72
-2.85	-1.26	-4.55	-3	-6.01	-7.77	-3.17	-4.01	-1.86	-7.05	-3.07	-2.96	-4.38	-8.17	-2.97	-2.56	-1.82	-1.01	-1.58	0.226	-2.04	-1.92	-1.11	-2.86	-3.21	-2.53
-2.69	-0.912	-4.67	-2.89	-6.04	-7.76	-4.97	-4.48	-2.09	-6.98	-2.02	-1.87	-5.64	-9.18	-2.74	-2.47	-1.59	-1.63	-2.65	0.823	-2.44	-1.72	-1.2	-2.67	-3.12	-2.05
-2.84	-0.297	-4.8	-3.35	-5.88	-7.76	-3.93	-3.73	-2.16	-6.77	-0.376	-2.2	-5.27	-8.93	-3.2	-2.66	-1.61	-1.69	-1.78	0.456	-1.81	-1.63	-1.21	-2.58	-3.62	-2.38
-2.72	-1.25	-4.76	-2.91	-6.04	-7.48	-3.63	-4.32	-2.07	-7.71	-3.46	-1.78	-5.5	-9.08	-3.18	-2.86	-2.01	-1.58	-1.82	0.737	-2.22	-1.8	-1.37	-2.9	-3.71	-2.62
-3.06	-2.59	-4.98	-3.21	-6.19	-7.81	-3.5	-4.9	-2.19	-7.05	-2.55	-1.75	-5.94	-8.56	-3.73	-2.99	-1.71	-1.2	-3.14	0.733	-2.26	-1.95	-1.06	-2.68	-3.85	-2.72
-3.08	-2.36	-4.63	-2.58	-5.85	-7.43	-3.78	-4.65	-2.39	-6.79	-3.01	-2.04	-5.34	-8.5	-3.72	-2.13	-1.58	-1.08	-3.52	0.606	-1.8	-1.56	-1.39	-2.69	-3.73	-2.06
-3.25	-1.86	-4.82	-2.93	-5.89	-7.28	-4.65	-4.6	-2.87	-8.05	-2.52	-3.48	-5.23	-8.18	-3.26	-2.79	-1.59	-0.913	-3.45	0.271	-1.09	-1.79	-1.2	-2.91	-4.13	-2.43
-3.14	-1.41	-4.82	-3.46	-6.01	-7.63	-4.22	-4.64	-2.11	-7.21	-1.6	-1.91	-5.4	-8.25	-3.22	-2.93	-2	-1.53	-3.45	0.323	-2.13	-1.64	-1.33	-2.86	-4.1	-2.21
-3.19	-1.15	-4.72	-3.05	-6.18	-7.39	-2.83	-5.31	-2.47	-8.59	-2.03	-1.99	-5.09	-7.98	-2.68	-2.68	-1.71	-1.49	-3.18	0.501	-1.95	-1.8	-1.55	-2.98	-3.62	-2.16
-3.09	-1.71	-4.74	-3.16	-5.56	-7.2	-3.18	-4.9	-2.56	-7.63	-2.48	-1.91	-5.81	-8.37	-3.07	-2.31	-1.04	-1.38	-2.74	0.82	-1.62	-1.48	-1.65	-2.74	-3.52	-2.59
-2.69	-1.99	-4.92	-3.23	-5.54	-7.18	-4.05	-4.9	-2.23	-8.2	-2.97	-1.37	-5.09	-9.12	-3.41	-3.29	-2.34	-1.14	-3.34	0.497	-2.24	-1.71	-1.53	-2.87	-3.96	-2.26
-2.36	-2.76	-4.8	-2.94	-5.68	-7.23	-4.17	-4.52	-2.14	-7.08	-2.76	-1.12	-4.74	-8.94	-3.76	-3.18	-2.13	-1.35	-2.87	0.614	-1.32	-1.74	-1.7	-2.85	-3.72	-3.04
-2.38	-1.82	-4.53	-3.6	-5.51	-7.63	-4.08	-4.65	-2.87	-7.06	-3.21	-2.21	-5.01	-8.24	-3.68	-2.99	-2.56	-1.25	-3.14	0.361	-2.28	-1.6	-1.71	-2.61	-3.31	-2.9
-2.58	-2.86	-4.74	-3.16	-5.54	-7.59	-3.26	-4.46	-2.92	-5.88	-1.9	-1.85	-5.48	-8.83	-3.82	-2.76	-3.26	-1.2	-3.9	0.337	-1.85	-1.72	-1.57	-2.69	-3.67	-3
-2.73	-1.99	-4.75	-3.34	-5.78	-7.17	-4.81	-4.67	-2.49	-6.34	-2.18	-1.96	-5.36	-8.65	-3.71	-3.29	-2.2	-1.27	-3.52	1.36	-2.23	-1.54	-1.58	-2.55	-3.51	-3.28
-2.82	-2.81	-4.5	-3.26	-5.98	-7.29	-4.27	-5.34	-3.05	-7.52	-2.5	-1.83	-5.31	-8.91	-3.39	-2.81	-2.19	-1.36	-3.13	0.546	-2.1	-1.48	-1.7	-2.44	-3.41	-3.3
-2.9	-1.7	-4.5	-2.77	-5.98	-7.6	-4.69	-5.04	-2.79	-7.15	-2.73	-1.39	-4.85	-8.31	-3.3	-2.92	-2.23	-1.27	-2.53	0.246	-1.94	-1.41	-1.56	-2.63	-3.39	-3.61
-2.82	-1.54	-4.49	-2.73	-5.72	-7.25	-4.26	-4.71	-3.49	-7.04	-2.32	-2.28	-5.25	-9.25	-3.32	-3.14	-1.83	-1.44	-3.17	0.386	-1.29	-1.44	-1.38	-2.83	-3.31	-2.46
-2.93	-1.74	-4.56	-2.82	-6.02	-7.12	-3.66	-4.75	-2.93	-7.78	-1.06	-1.09	-5.27	-8.96	-3.32	-2.88	-2.71	-1.02	-2.26	0.618	-2.73	-1.79	-1.74	-2.97	-3.47	-2.24
-2.88	-0.573	-4.49	-2.72	-5.67	-7.3	-4.44	-4.76	-3.06	-7.41	-2.89	-3.4	-5.02	-8.99	-2.89	-2.78	-1.78	-0.221	-3.06	0.237	-1.09	-1.66	-1.6	-2.66	-3.57	-2.79
-3.03	-1.56	-4.76	-2.87	-5.5	-7.48	-3.64	-4.82	-3.1	-7.65	-1.68	-2.74	-4.62	-9.11	-3.21	-2.89	-1.9	-0.791	-3.02	0.0224	-2.21	-1.99	-1.61	-2.87	-3.73	-2.03
-2.93	-2.21	-4.49	-3.41	-5.36	-7.45	-4.9	-5.72	-3.24	-7.18	-2.67	-2.32	-5.09	-8.57	-3.11	-2.73	-1.53	-0.214	-2.56	-0.231	-2.45	-2.02	-1.88	-2.7	-4.03	-2.18
-2.95	-2.38	-4.61	-3.69	-5.7	-7.48	-4.2	-4.66	-3.36	-7.4	-3.43	-2.71	-4.73	-8.85	-3.29	-2.77	-1.54	-0.617	-3.18	-0.156	-2.04	-1.91	-1.79	-2.42	-3.24	-3.12
-2.9	-1.36	-4.67	-3.87	-5.62	-7.51	-3.21	-4.42	-3.24	-7.14	-1.74	-2.54	-4.81	-9.41	-2.83	-2.74	-1.1	-0.821	-2.28	-0.668	-2.18	-1.74	-1.56	-2.28	-3.35	-1.59
-2.81	-2.07	-4.68	-3.94	-5.39	-7.68	-4.1	-4.63	-3.19	-7.71	-1.84	-2.33	-5.81	-9.82	-3.06	-2.99	-1.96	-1.28	-2.8	0.148	-2.61	-1.94	-1.55	-2.09	-3.54	-1.97
-2.93	-2.21	-4.69	-3.98	-5.51	-7.69	-4.49	-3.95	-2.55	-7.27	-2.04	-1.42	-5.17	-9.64	-3.17	-2.95	-1.81	-0.973	-3.47	-0.42	-2.05	-1.71	-1.3	-2.41	-3.75	-2.23
-2.96	-2.29	-4.67	-3.62	-5.81	-7.34	-3.79	-3.91	-1.49	-6.77	-1.26	-1.92	-5.48	-8.59	-3.56	-3.4	-1.38	-1.41	-3.73	-0.648	-1.62	-1.81	-1.35	-2.58	-3.3	-2.44
-2.9	-1.4	-4.51	-3.27	-6.22	-7.27	-3.36	-4.07	-1.4	-5.73	-2.66	-2.58	-4.86	-8.54	-4.43	-2.93	-1.74	-1.01	-3.83	-0.331	-2.73	-2.03	-1.44	-2.39	-3.28	-2.09
-3.04	-1.88	-4.52	-3.32	-6.14	-7.05	-3.05	-4.19	-1.38	-6.68	-1.78	-2.14	-5.02	-8.99	-3.85	-2.75	-1.07	-1.27	-2.73	-0.0237	-1.43	-2.11	-1.47	-2.94	-3.29	-2.63
-3.42	-2.24	-4.31	-3.75	-5.92	-7	-2.45	-4.57	-1.3	-7.57	-1.1	-2.57	-5.17	-9.25	-4.01	-2.83	-1.87	-1.28	-3.23	-0.609	-2.25	-1.94	-1.48	-2.36	-3.26	-2.64
-3.36	-1.6	-4.35	-4.07	-6.55	-6.98	-3.92	-4.49	-1.04	-7.43	-0.54	-2.46	-4.98	-8.71	-3.68	-3.45	-1.87	-1.24	-2.47	-0.176	-3.15	-1.76	-1.34	-2.56	-3.3	-2.27
-2.85	-1.12	-4.54	-3.66	-6.41	-6.5	-4.69	-4.3	-0.942	-7.21	-1.54	-2.86	-5.64	-8.13	-3.5	-3.52	-1.43	-1.08	-3.05	-0.597	-3.03	-1.77	-1.4	-2.65	-3.4	-2.71
-3.06	-1.6	-4.63	-2.98	-6.69	-6.73	-4.11	-4.95	-1.09	-7.55	-0.883	-1.65	-5.52	-8.7	-4.04	-3.46	-1.18	-1.18	-2.35	-0.267	-1.58	-1.84	-1.66	-2.57	-3.54	-2.6
-2.72	-2.42	-4.67	-3.43	-6.55	-7.15	-4.26	-4.7	-1.23	-6.77	-1.95	-2.62	-5.23	-9.15	-4.03	-3.69	-0.953	-0.973	-2.66	0.0203	-2.04	-1.92	-1.43	-2.64	-3.82	-2.82
-3.15	-2.27	-4.5	-2.98	-6.73	-6.7	-3.58	-5.17	-0.791	-7.66	-2	-0.959	-5.73	-8.7	-3.84	-3.66	-1.45	-1.11	-2.99	0.516	-2.68	-2.15	-0.101	-2.88	-3.69	-2.48
-3.17	-3.81	-4.8	-3.01	-6.22	-6.95	-3.55	-4.63	-1.31	-7.02	-1.76	-0.889	-4.76	-8.63	-3.51	-3.33	-1.68	-0.723	-1.66	0.389	-2.06	-1.97	0.728	-2.81	-3.59	-2.25
-3.34	-3.1	-4.6	-2.8	-6.57	-6.78	-4.99	-4.86	-1.4	-6.8	-1.83	-1.61	-5.05	-9.48	-3.39	-3.59	-1.76	-0.969	-1.61	-0.34	-1.93	-1.89	0.548	-2.82	-3.61	-2.1
-3.1	-0.869	-4.6	-3.62	-6.33	-6.52	-4.72	-5.29	-1.2	-6.41	-3.82	-2.09	-4.75	-8.82	-2.58	-3.95	-2.18	-0.161	-2.5	-0.584	-1.49	-2.08	1.53	-2.6	-3.37	-1.64
-3.03	-0.0539	-4.34	-3.68	-6.12	-6.72	-4.92	-5.14	-1.37	-5.56	-1.55	-1.31	-5.79	-9.43	-2.78	-3.36	-1.98	-0.0745	-1.99	-0.37	-1.92	-2.01	2.62	-2.92	-3.48	-2.17
-3.02	-0.0916	-4.34	-2.79	-6.21	-6.22	-5.35	-4.4	-1.23	-6.6	-3.28	-3.28	-5.9	-8.81	-3.05	-3.3	-3.26	-0.413	-2.15	-0.292	-3.07	-1.85	2.24	-2.9	-3.74	-2.54
-3.11	-1.52	-4.39	-3.35	-6.26	-6.9	-4.15	-5.26	-1.51	-7.96	-2.01	-1.61	-5.44	-9.08	-2.8	-3.21	-1.47	-0.855	-2.44	-0.215	-1.29	-1.89	2.52	-2.5	-3.67	-1.82
-3.22	-2.02	-4.48	-3.74	-5.92	-6.67	-3.75	-5.21	-1.37	-6.66	-2.38	-2.98	-5.37	-8.33	-3.2	-3.82	-1.82	-0.56	-2.29	-0.517	-2.63	-1.98	2.42	-2.69	-3.62	-2.33
-3.2	-1.62	-4.51	-3.58	-6.23	-6.32	-4.13	-4.63	-1.75	-6.77	-1.32	-1.69	-4.98	-8.49	-3.35	-3.36	-2.08	-0.907	-1.86	-0.547	-2.63	-1.71	2.37	-2.65	-3.35	-1.99
-3.21	-1.47	-4.32	-3.22	-5.84	-6.6	-4.06	-4.91	-1.85	-5.93	-1.71	-2.89	-5.66	-9.4	-3.14	-3.46	-2.5	-0.968	-2.57	-1.21	-2.37	-1.93	2.51	-2.63	-3.48	-2.45
-3.06	-1.47	-4.62	-3.45	-5.84	-6.64	-3.79	-4.52	-1.93	-7.13	-2.22	-1.53	-5.5	-8.49	-3.06	-3.25	-2.77	-1.38	-2.4	0.0285	-2.24	-1.77	2.53	-2.19	-3.44	-1.41
-2.71	-1.51	-4.52	-3.44	-4.98	-6.71	-4.3	-4.38	-1.97	-6.97	-2.54	-1.34	-5.57	-7.99	-3.25	-3.82	-1.68	-1.23	-2.42	-0.738	-1.76	-1.89	2.48	-2.22	-3.64	-1.76
-2.79	-0.417	-4.31	-3.26	-4.37	-6.43	-3.96	-4.1	-0.732	-7.2	-2.41	-3.58	-4.83	-7.69	-3.17	-3.14	-2.09	-1.02	-2.1	-0.331	-2.94	-1.86	2.25	-2.1	-3.76	-1.47
-2.8	-1.63	-4.54	-2.92	-4.52	-6.35	-3.56	-3.88	-0.774	-8.94	-2.46	-1.83	-5.2	-7.91	-2.84	-3.16	-2.27	-1.01	-2.29	-0.259	-1.53	-1.5	2.18	-2.4	-3.64	-1.4
-2.62	-0.85	-4.14	-2.7	-4.5	-5.89	-3.91	-4.08	-0.42	-7.36	-2.93	-1.79	-4.95	-7.19	-2.97	-3.36	-2.49	-0.663	-2.82	0.248	-1.4	-1.26	2.29	-2.49	-3.87	-2.43
-2.63	-0.976	-4.42	-3.34	-4.8	-6.19	-2.97	-4.77	-1.16	-6.9	-1.16	-2.75	-4.89	-8.75	-3.34	-3.11	-1.12	-0.594	-1.81	0.678	-2.4	-1.24	1.78	-2.48	-3.37	-1.51
-2.85	-1.7	-4.41	-3.38	-5.09	-6.7	-3.79	-2.95	-1.05	-7.49	-1.69	-3.48	-5.05	-8.94	-3.43	-3.31	-0.638	-0.42	-2.61	0.688	-1.69	-1.46	1.2	-2.37	-3.86	-2.09
-3.14	-2.22	-4.03	-3.43	-4.51	-5.93	-3.8	-4.89	-1.46	-8.48	-2.23	-2.03	-5.49	-8.02	-3.96	-3.29	-1.53	-0.935	-3.02	0.232	-1.89	-1.58	1.64	-2.43	-3.88	-1.98
-2.75	-1.58	-3.81	-3.39	-3.19	-6.5	-3.96	-4.83	-1.56	-7.67	-3.21	-1.96	-5.12	-8.31	-3.44	-3.32	-1.46	-0.735	-2.45	-0.0928	-3.42	-1.64	1.2	-2.37	-3.59	-2.2
-2.91	-1.39	-3.97	-4.15	-2.93	-6.41	-3.19	-4.91	-1.48	-6.6	-2.44	-3.21	-5.06	-7.87	-2.98	-3.66	-0.953	-0.0466	-1.95	-0.62	-2.43	-1.86	1.48	-2.65	-3.59	-1.79
-2.74	-1.12	-4.03	-3.18	-2.75	-6.39	-3.24	-3.96	-1.53	-7.6	-2.61	-1.13	-4.99	-7.74	-2.41	-3.32	-1.97	-0.652	-1.91	-0.261	-1.79	-1.81	1.61	-2.76	-3.65	-2.16
-2.98	-1.03	-4.11	-3.7	-3.14	-6.35	-3.55	-4.78	-1.26	-7.52	-1.63	-2.43	-5.45	-8.09	-2.39	-3.2	-1.52	-0.661	-1.53	-0.478	-3.15	-1.73	1.06	-2.62	-3.65	-1.9
-2.63	-0.0049	-4.06	-3.11	-3.04	-7.17	-2.51	-4.69	-0.87	-7.67	-0.739	-3.38	-5.42	-7.99	-2.92	-2.78	-1.46	-1.01	-2.07	-1.08	-3.3	-1.73	0.991	-2.35	-3.72	-1.89
-2.82	-0.149	-4.33	-3.48	-3.09	-7.12	-3.91	-3.68	-0.977	-7.63	-1.79	-2.73	-5.71	-8.02	-3.17	-3.13	-1.85	-1.41	-2.8	-1.04	-2.73	-1.76	1.3	-2.55	-3.94	-1.91
-2.76	-0.508	-4.46	-2.54	-3.49	-6.71	-3.78	-4.45	-0.808	-7.44	-2.41	-0.967	-5.83	-7.53	-3.64	-3.19	-1.87	-0.372	-1.76	0.244	-3.31	-1.99	1.49	-2.52	-3.79	-1.87
-3.08	0.538	-4.37	-3.65	-3.99	-7.23	-4.11	-4.17	0.163	-8.1	-2	-2.72	-5.12	-8.6	-2.88	-3.48	-1.46	-0.857	-2.03	0.908	-3.16	-1.42	1.52	-2.3	-3.5	-1.61
-3.07	-0.439	-4.43	-3.26	-3.79	-7.6	-4.5	-4.49	1.13	-7.15	-2.52	-2.16	-5.48	-7.73	-2.71	-3.13	-1.77	-1.17	-2.21	0.656	-2.82	-0.842	1.05	-2.24	-3.67	-1.99
-3.14	0.063	-4.35	-3.27	-3.34	-5.9	-4.43	-4.26	0.881	-7.74	-2.31	-3.54	-5.32	-6.97	-2.35	-2.83	-2.17	-1.11	-1.74	-0.168	-3.7	-0.659	0.813	-2.48	-3.52	-2.16
-3.01	-0.316	-4.41	-2.7	-4.07	-6.37	-2.36	-4.66	0.803	-7.45	-2.15	-1.13	-4.9	-7	-2.75	-3.28	-2.02	-1.15	-1.52	-0.693	-3.05	-0.505	0.931	-2.07	-3.64	-1.73
-3.1	-0.369	-4.42	-2.19	-4.29	-6.25	-3.04	-3.88	0.355	-8.26	-2.62	-1.9	-5.17	-7.25	-3.02	-3.73	-2.62	-1.11	-1.63	-1.21	-3.24	-0.278	0.701	-2.17	-3.8	-1.95
-2.72	-0.356	-4.38	-2.79	-4.27	-6.83	-3.99	-5.13	0.708	-7.47	-2.95	-1.37	-5.25	-7.3	-3.45	-3.46	-2.32	-0.814	-1.96	-0.18	-2.91	-0.583	0.814	-1.73	-3.47	-1.17
-3.17	-0.937	-4.19	-2.8	-4.47	-6.24	-2.64	-4.15	0.142	-7.54	-1.75	-1.24	-5.37	-7.36	-2.89	-3.44	-2.58	-0.585	-1.85	-0.113	-3.97	-0.426	0.871	-1.82	-3.69	-1.71
-3.22	-0.549	-4.28	-2.75	-4.08	-6.82	-2.93	-4.84	-0.157	-7.49	-1.91	-1.59	-4.86	-8.45	-2.62	-3.44	-2.22	-1.29	-2.72	0.581	-3.42	-0.628	1.26	-1.94	-3.17	-1.59
-3.07	-1.09	-4.34	-2.32	-4.74	-6.09	-4.23	-5.23	-0.686	-7.82	-1.53	-3.28	-5.03	-7.3	-3.21	-3.19	-1.4	-1.33	-3.69	-0.139	-3.15	-0.551	1.57	-1.49	-3.85	-1.53
-3.03	-1.32	-4.15	-2.93	-4.77	-5.98	-4	-4.7	-0.135	-7.36	-1.37	-2.74	-5.33	-7.09	-3.12	-3.06	-1.56	-0.698	-4.36	-0.00622	-3.35	-0.782	1.29	-2.05	-3.38	-1.78
-2.81	-1.69	-4.29	-3.2	-4.52	-6.02	-3.75	-2.88	0.314	-7.36	-1.35	-2.24	-5.64	-7.63	-3.18	-2.85	-0.614	-0.896	-3.93	-0.49	-3.25	-0.712	1.51	-1.63	-3.29	-2.23
-2.57	-1.1	-4.13	-2.83	-4.44	-5.85	-2.62	-3.47	-0.429	-7.17	-0.743	-2.94	-5.06	-7.19	-3.44	-3.11	-1.59	-1.04	-3.02	-0.713	-3.18	-0.926	1.23	-1.95	-3.2	-1.57
-2.8	-1.72	-4.23	-3.05	-4.36	-5.77	-3.95	-3.34	-0.301	-7.76	-3.12	-2.36	-5.3	-7.05	-2.88	-3.15	-2.35	-0.978	-1.92	-0.312	-3.94	-0.979	1.24	-1.72	-3.15	-1.99
-2.6	-1.78	-4.19	-3.2	-4.34	-6.28	-3.14	-3.57	0.287	-7.29	-1.99	-1.59	-4.91	-6.87	-3.08	-2.94	-1.98	-0.572	-2.54	-0.826	-2.71	-0.67	1.36	-1.85	-3.42	-1.74
-2.59	-2.14	-4.28	-3.37	-3.97	-6.28	-3.22	-4.22	-0.132	-7.55	-1.72	-1.77	-4.9	-7.59	-2.68	-3.35	-1.47	-0.552	-2.4	-0.205	-3.53	-0.903	1.26	-1.73	-3.27	-1.89
-2.87	-2.18	-4.25	-3.38	-4.08	-5.81	-3.74	-3.83	-0.0134	-7.63	-1	-3.71	-5.18	-7.73	-2.74	-3.47	-0.957	-0.307	-2.96	0.278	-4.08	-0.777	1.2	-1.66	-3.63	-1.45
-2.78	-1.45	-4.49	-2.52	-4.44	-5.85	-3.31	-3.53	-0.238	-6.81	-2.47	-3.31	-4.89	-7.73	-3.08	-3.27	-1.07	0.103	-3.97	0.0358	-4.03	-0.976	1.6	-1.91	-3.6	-2.03
-2.45	-1.53	-4.17	-3.5	-3.97	-5.31	-3.35	-3.03	-0.359	-5.92	-2.09	-1.83	-5.14	-7.75	-2.97	-3.05	-1.8	-0.351	-3	0.0529	-2.94	-0.976	1.63	-1.82	-3.07	-1.4
-2.28	-1.05	-4.17	-2.91	-4	-5.7	-2.52	-2.71	-0.426	-6.58	-1.73	-0.904	-5.37	-7.6	-3.12	-2.9	-2.15	-0.0498	-2.31	0.803	-2.68	-1.03	1.11	-1.94	-3.63	-1.29
-2.29	-1.95	-3.85	-3.04	-4.23	-5.9	-2.7	-3.13	-0.487	-6.5	-1.45	-1.32	-4.81	-7.88	-3.16	-2.84	-1.82	-0.295	-2.07	0.786	-2.33	-0.936	0.901	-1.85	-3.46	-2.17
-2.18	-1.97	-3.86	-2.89	-4.12	-6.17	-2.65	-3.25	-0.933	-6.29	-1.63	-0.64	-5.22	-8.23	-3.61	-3.01	-1.31	-0.534	-1.54	0.483	-2.28	-1.05	1.01	-0.962	-3.99	-2.52
-2.56	-2.27	-3.92	-3.11	-3.99	-6.58	-3.34	-2.71	-0.565	-6.97	-2.5	-3.57	-5.18	-7.8	-3.35	-2.76	-0.68	-1.23	-1.85	1.03	-2.56	-1.09	0.996	-0.0458	-3.89	-2.36
-2.7	-1.26	-4.2	-3.2	-4.46	-5.43	-3.14	-3.51	-0.75	-7	-2.59	-1.25	-5.89	-7.81	-3.15	-2.98	-0.634	-0.996	-2.62	0.395	-3.19	-1.2	1.47	0.619	-3.75	-2.21
-2.76	-1.78	-4.31	-3	-4.45	-6.49	-3.62	-2.93	-0.458	-6.66	-3.07	-2.3	-5.05	-7.3	-3.25	-2.67	-0.865	-0.682	-3.34	-0.0878	-2.8	-1.2	0.954	0.243	-3.54	-1.97
-2.85	-1.41	-4.32	-3.28	-4.28	-6.38	-2.99	-2.81	-0.192	-7	-2.69	-3.91	-4.49	-6.91	-3.27	-2.88	-1.4	-0.91	-2.43	-0.445	-3.01	-1.2	0.995	0.14	-3.51	-1.67
-2.78	0.158	-4.32	-2.35	-4.17	-6.35	-3.35	-3.34	-0.644	-7.27	-2.2	-3.08	-4.55	-7.03	-2.8	-2.32	-1.41	-1.29	-2.75	-0.997	-3.69	-1.46	0.768	0.00116	-3.72	-2.5
-2.62	-0.604	-4.21	-3	-4.32	-5.86	-3.74	-3.96	-0.263	-6.9	-1.13	-3.19	-4.21	-7.26	-2.79	-1.82	-2.3	-1.53	-1.88	-0.504	-3.47	-1.24	0.518	-0.0943	-3.54	-1.57
-2.77	-0.93	-4.3	-2.77	-4.2	-4.99	-2.8	-3.53	-0.417	-6.47	-2.46	-2.26	-5	-7.98	-2.6	-2.41	-2.5	-1.65	-2.13	-0.818	-2.32	-1.62	0.963	-0.0297	-3.33	-1.98
-2.76	-0.5	-4.38	-2.66	-4.37	-5.47	-3.24	-3.55	-0.316	-6.69	-2.15	-1.13	-5.02	-8.01	-2.31	-2.16	-2.04	-1.15	-0.91	-0.382	-2.36	-1.32	1.92	-0.351	-3.4	-1.97
-2.68	-0.201	-4.68	-2.72	-4.46	-5.83	-3.38	-3.64	-0.514	-5.92	-1.51	-3.94	-4.82	-7.77	-2.54	-2.66	-1.43	-0.898	-0.475	-0.141	-2.79	-1.17	1.69	-0.163	-3.44	-1.5
-2.97	-0.733	-4.91	-2.96	-4.76	-6.47	-3.36	-3.96	-0.151	-6.46	-2.6	-1.6	-4.17	-8.1	-2.77	-3.1	-1.54	-1.44	-0.649	0.139	-3.12	-1.43	1.79	-0.339	-3.7	-2.34
-2.67	-0.866	-4.8	-2.66	-4.76	-5.29	-2.6	-4.44	-0.208	-7.41	-2.56	-1.91	-4.79	-7.57	-3.32	-2.69	-1.64	-1.51	-2.28	0.215	-3.4	-1.54	1.95	-0.312	-3.28	-1.9
-2.88	-1.64	-4.4	-2.83	-5.43	-6.23	-3.25	-3.62	-0.359	-6.83	-1.44	-2.66	-5.31	-7.91	-3.12	-2.99	-1.53	-1.26	-1.61	1.03	-2.98	-1.67	1.64	-0.829	-3.43	-2.39
-2.78	-1.73	-4.13	-2.41	-4.85	-6.12	-2.94	-5.05	-0.251	-7.14	-1.47	-3.53	-5.25	-8.32	-3.25	-3.24	-1.88	-0.888	-1.46	0.848	-2.78	-1.47	1.52	-0.433	-3.61	-2.53
-2.58	-1.61	-4.17	-2.9	-5	-5.27	-3.5	-4.99	-0.308	-6.48	-2.24	-1.96	-4.96	-8.43	-2.48	-2.79	-1.97	-0.978	-1.35	-0.31	-2.33	-1.81	1.11	-0.681	-3.58	-2.51
-2.81	-2.03	-4.01	-3.12	-4.85	-6.06	-2.43	-4.78	-0.839	-7.37	-1.7	-1.25	-5.67	-8.32	-2.71	-2.85	-1.21	-0.952	-1.74	0.757	-2.42	-1.75	0.859	-0.8	-3.63	-2.93
-3.02	-1.12	-4.52	-2.99	-4.91	-6.05	-3.46	-4.34	-1.07	-7.68	-2.16	-1.57	-5.38	-7.35	-2.82	-3.04	-1.24	-1.53	-1.48	1.75	-2.71	-1.58	1.13	-1.05	-3.65	-2.98
-3.29	-1.31	-4.81	-3.11	-4.51	-5.77	-3.7	-4.65	-1.02	-6.86	-1.98	-2.77	-4.91	-8.65	-2.65	-3.01	-1.74	-0.591	-2.85	1.86	-2.74	-1.79	1.18	-0.978	-3.73	-2.06
-3.06	-1.73	-4.88	-3.3	-4.79	-5.84	-4.21	-4.95	-1.72	-6.39	-1.69	-2.88	-4.53	-8.42	-2.9	-2.89	-1.81	-0.738	-1.72	2.25	-3.18	-1.8	1.15	-1.46	-3.47	-1.69
-3.18	-1	-4.93	-2.71	-4.37	-6.51	-4.29	-4.41	-1.65	-7.88	-0.662	-2.61	-5.2	-8.04	-3.39	-3.29	-2.01	-1.43	-2.22	0.968	-3.18	-1.7	1.27	-0.908	-3.59	-1.9
-3.31	-1.57	-4.95	-3.05	-4.93	-5.96	-4.15	-4.58	-0.95	-7.13	-2.2	-2.45	-5.91	-8.23	-3.15	-3.55	-2.3	-1.75	-1.53	1.25	-2.57	-1.5	0.91	-1.04	-4.2	-2.67
-3.39	-1.5	-5	-3.04	-5.23	-6.77	-3.7	-4.66	-0.904	-7.92	-1.41	-2.67	-5.57	-8.39	-3.32	-3.2	-1.79	-1.01	-1.14	0.249	-2.5	-1.76	0.834	-0.606	-4.03	-2.32
-3.31	-0.401	-4.81	-3.56	-4.62	-6.77	-3.72	-4.78	-0.655	-7.24	-1.64	-1.28	-5.01	-8.06	-2.84	-2.84	-3.02	-1.21	-1	0.436	-3.13	-1.76	0.946	-0.753	-3.21	-2.05
-3.41	-0.953	-4.25	-3.38	-4.73	-6.78	-3.37	-5.79	-1.36	-7.97	-2.21	-0.195	-4.88	-7.7	-2.99	-1.57	-2.49	-1.01	-0.232	0.117	-2.89	-1.61	0.429	-0.59	-2.85	-1.93
-3.13	-1.23	-4.84	-3.16	-4.79	-6.43	-4.19	-4.7	-0.785	-7.33	-1.83	-1.67	-5.67	-7.35	-2.5	-2.14	-2.24	-1.09	-0.586	-0.0434	-3.32	-1.74	0.741	-0.705	-3.15	-2.3
-2.68	-1.31	-4.81	-2.69	-5.09	-5.69	-4.59	-4.71	-1.36	-7.15	-2.57	-0.438	-5.07	-8.36	-3.02	-1.98	-2.01	-1.49	-0.685	0.021	-2.69	-1.5	0.347	-0.681	-2.96	-1.4
-3.18	-0.856	-4.94	-3.35	-4.9	-5.27	-4.57	-4.24	-1.44	-7.84	-2.73	-1.04	-6.07	-7.92	-3.66	-2.59	-0.998	-1.57	-2.77	0.427	-3.29	-1.67	0.312	-0.709	-2.85	-2.06
-3.41	-0.717	-4.63	-2.97	-4.26	-5.08	-4.07	-4.37	-1.38	-7.47	-1.57	-0.916	-5.97	-8.27	-3.74	-2.48	-0.792	-1.49	-3.24	0.857	-2.35	-1.64	1.41	-0.45	-2.93	-2.68
-3.32	-0.251	-4.45	-2.81	-4.72	-5.54	-5.15	-5.15	-1.68	-6.48	-1.9	-0.993	-5.35	-8.17	-3.34	-2.9	-1.22	-1.26	-2.8	0.278	-3.16	-1.86	2.39	-0.0452	-2.65	-2.29
-3.09	-0.234	-4.76	-3.51	-4.57	-5.75	-4.7	-4.91	-2.2	-6.82	-1.65	-1.86	-5.36	-8.09	-3.24	-2.57	-1.11	-1.03	-2.84	-0.726	-3.34	-1.9	2.55	-0.168	-2.55	-1.73
-3.24	-1.13	-4.73	-3.16	-4.49	-6.49	-5.25	-4.84	-2.65	-5.97	-2.24	-1.66	-5.91	-7.44	-2.81	-2.22	-1.61	-1.16	-2.34	-1.56	-2.84	-2	2.4	-0.282	-2.66	-1.67
-3	-0.937	-4.98	-2.87	-4.82	-6.96	-4.7	-5.08	-2.19	-6.4	-1.05	-1.18	-5	-8.78	-2.55	-1.86	-1.17	-1.63	-0.888	-0.527	-3.06	-1.69	2.69	-0.338	-2.96	-1.58
-3.24	-0.918	-5.22	-3.41	-4.52	-8.14	-4.25	-5.31	-2.18	-6.73	-1.67	-2.03	-4.72	-8.99	-2.46	-2.91	-2.26	-1.03	-0.595	0.296	-1.63	-1.41	2.57	-0.287	-3.25	-1.59
-3.61	-0.152	-4.77	-2.82	-4.58	-6.81	-4.13	-4.92	-2.07	-6.22	-1.48	-1.82	-5.66	-8.7	-2.66	-2.92	-1.94	-0.999	-1.17	-0.22	-2.96	-1.67	2.83	-0.564	-2.91	-1.63
-3.69	-0.255	-4.65	-3.24	-4.59	-6.58	-3.56	-4.96	-2.24	-6.99	-1.92	-2.06	-5.26	-8.2	-2.54	-2.76	-2.37	-1.63	-1.46	0.329	-1.95	-1.99	3.07	-0.307	-1.97	-2.05
-3.58	-0.0451	-4.86	-3.11	-4.13	-6.63	-3.87	-5.03	-2.17	-7.29	-3.46	-2.23	-5.93	-8.67	-3.24	-2.86	-2.15	-1.33	-1.85	-0.164	-3.4	-1.8	2.72	-0.501	-2.46	-2.18
-3.23	-0.949	-4.94	-2.6	-3.97	-6.91	-2.73	-4.42	-1.42	-8.19	-2.24	-1.16	-5.52	-8.72	-3.16	-2.9	-2.12	-0.958	-1.98	-0.607	-2.85	-1.89	2.51	-0.79	-2.55	-2.19
-3.64	-0.381	-4.98	-2.57	-3.89	-7.05	-2.54	-3.85	-0.727	-7.41	-1.41	-0.834	-6.14	-9.1	-3.14	-2.87	-2.26	-1.36	-1.51	0.139	-3.4	-2.11	2.53	-0.79	-2.24	-1.95
-3.3	-0.577	-5.28	-1.93	-3.91	-7	-2.35	-4.23	-0.705	-8.27	-1.15	-1.18	-5.36	-7.78	-3.13	-3.29	-2.4	-1.61	-1.41	0.239	-3.14	-2.01	2.12	-0.698	-2.42	-2.01
-3.05	-1.96	-5.22	-2.21	-4.27	-6.96	-2.26	-4.61	-1.26	-7.11	-2.86	-1.95	-6.09	-8.38	-3.37	-2.81	-2.55	-1.74	-0.977	0.0911	-2.54	-1.91	2.36	-0.842	-2.77	-2.61
-3.09	-1.3	-4.87	-2.94	-4	-6.74	-2.75	-4.5	-1.36	-6.81	-1.74	-1.49	-5.97	-8.23	-2.72	-3.04	-1.85	-1.5	-0.398	0.0945	-2.72	-1.95	2.34	-0.791	-2.62	-2.54
-3.21	-0.325	-5.35	-2.52	-4.37	-6.2	-2.16	-4.13	-1.09	-7.9	-1.2	0.938	-5.74	-8.16	-2.41	-2.85	-1.39	-1.56	-1.15	0.323	-2.17	-1.96	2.33	-1.16	-2.67	-2.15
-3.1	-0.634	-5.1	-2.4	-4.55	-6.21	-3.4	-3.56	-0.89	-6.98	-2.14	-0.441	-5.32	-7.65	-2.41	-2.87	-1.48	-1.34	-1.58	0.132	-2.19	-1.98	2.32	-1.2	-3.04	-1.77
-3.62	-1.77	-4.99	-2.54	-3.91	-6.39	-4.05	-4.84	-1.4	-7.23	-1.09	-2.11	-4.87	-8.3	-2.17	-2.82	-2.34	-1.15	-2.68	0.122	-1.99	-1.72	2.19	-1.08	-3.13	-1.1
-3.79	-1.23	-5.42	-2.82	-3.71	-6.71	-3.92	-3.87	-1.41	-7.41	-2.04	-2.38	-5.97	-8.97	-1.94	-2.79	-1.5	-0.856	-2.25	-0.291	-2.72	-2.16	2.01	-1.17	-3.01	-1.21
-3.79	-1.34	-5.43	-3.43	-3.91	-7.38	-3.35	-3.98	-1.91	-7.02	-1.33	-2.04	-6.19	-8.43	-1.92	-3.3	-1.96	-0.764	-2.05	-0.735	-2.85	-1.76	1.38	-1.15	-3.01	-1.37
-3.36	-1.16	-5.36	-4.08	-4.03	-6.5	-3.2	-3.1	-1.47	-6.76	-2.16	-1.07	-6.12	-7.55	-2.17	-3.32	-2.75	-0.426	-1.63	-0.731	-2.51	-1.81	1.78	-0.959	-3.44	-1.11
-3.24	-1.79	-5.24	-3.44	-3.81	-7.38	-3.92	-3.31	-2.12	-7.42	-2.07	-3.22	-5.7	-7.66	-2.46	-3.28	-2.66	-0.37	-1.71	-0.504	-2.5	-2.06	1.67	-0.659	-2.83	-1.61
-3.27	-0.942	-5.13	-3.47	-4.47	-6.74	-3.1	-3.39	-2.49	-6.99	-2.83	-2.38	-5.43	-7.27	-3.42	-2.93	-3.21	-0.621	-0.957	-0.746	-2.2	-2.13	1.53	-0.829	-3.07	-1.14
-3.23	-1.48	-5.12	-3.65	-4.34	-7.5	-2.71	-2.12	-2.35	-7.19	-2.6	-1.9	-5.15	-7.7	-2.7	-2.91	-2.02	-0.236	-1.41	-0.109	-2.83	-2.13	1.61	-0.615	-3.02	-1.3
-3.78	-1.26	-5.17	-2.95	-4.45	-8.24	-2.9	-3.61	-3.21	-7.06	-1.86	-1.32	-5.5	-7.84	-2.38	-3.03	-2.64	-0.228	-2.98	-0.348	-2.55	-2.01	1.38	-0.805	-2.99	-1.77
-3.72	-0.905	-5.16	-3	-4.3	-8.01	-3.28	-3.61	-2.99	-7.97	-1.93	-1.87	-5.43	-8.35	-2.78	-3.04	-2.06	-0.1	-2.84	-0.744	-3.53	-2.03	1.41	-1.07	-3.23	-2.14
-3.84	-1.71	-5.3	-2.85	-3.87	-7.71	-2.38	-3.17	-2.44	-7.18	-2.33	-1.1	-5.4	-8.27	-2.66	-2.51	-1.21	-0.0958	-3.12	-0.283	-2.63	-1.98	1.41	-0.705	-3.14	-2.57
-3.73	-2.37	-5.13	-3.24	-4.19	-7.27	-2.44	-4.1	-1.7	-8.21	-2.43	-1.47	-5.41	-7.3	-3.15	-1.96	-1.67	-0.364	-1.1	-0.785	-3.07	-2.11	1.18	-1.03	-3.16	-2.65
-3.48	-2.42	-5.15	-3.33	-3.56	-6.71	-2.86	-3.51	-2.12	-6.77	-2.22	-1.38	-5.73	-7.12	-3.89	-2.72	-1.56	-0.5	-0.756	-0.465	-3.09	-2.22	1.22	-0.975	-3.02	-2.62
-3.35	-1.84	-5.64	-3.08	-4.07	-6.56	-4.06	-3.08	-1.88	-8.32	-1.57	-2.2	-5.07	-7.5	-3.34	-2.47	-0.596	-0.502	-2.25	-1.05	-3.07	-1.77	1.35	-1.02	-3.43	-1.92
-3.74	-1.35	-5.31	-3.26	-4.12	-7.26	-3.65	-3.69	-1.4	-7.64	-2.06	-2.79	-5.57	-7.92	-2.29	-2.54	-0.329	-0.184	-2.11	-1.03	-2.15	-1.86	1.06	-1.25	-3.58	-1.8
-3.59	-0.637	-5.36	-3.06	-4.38	-7.07	-3.72	-2.34	-2.03	-7.99	-2.06	-3.91	-5.6	-7.61	-2.42	-2.81	-1.03	-0.362	-2.56	-0.677	-1.83	-2.18	1.32	-1.27	-3.06	-2.08
-2.95	-1.19	-5.26	-3.24	-4.26	-6.21	-3.8	-3.51	-2.45	-7.48	-3.03	-1.4	-5.87	-7.51	-2.96	-2.87	-0.711	-0.373	-2.82	-0.0873	-3.19	-2.21	0.977	-0.992	-2.64	-1.7
-3.11	-1.66	-4.72	-3.34	-4.21	-5.65	-3.57	-2.89	-2.34	-7.65	-1.52	-2.02	-4.66	-7.78	-2.48	-2.39	-0.722	-0.48	-2.91	-0.353	-3.2	-2.22	1.04	-1.52	-2.33	-2.71
-3.04	-2.16	-4.9	-3.48	-4.65	-5.66	-3.13	-4.69	-2.44	-7.43	-2.02	-1.74	-4.91	-7.14	-3.23	-2.23	-1.67	-0.212	-3.71	-0.193	-3.01	-2.37	1.03	-1	-2.68	-1.7
-3.61	-0.775	-5.24	-3.23	-4.35	-4.9	-3.82	-4.29	-1.82	-6.6	-1.67	-0.512	-5.13	-7.4	-2.95	-1.73	-1.32	-0.231	-1.81	0.368	-2.72	-2.17	0.67	-1.25	-2.83	-1.23
-3.54	-1.75	-5.24	-3.22	-4.54	-5.41	-4.44	-3.97	-2.03	-6.37	-0.737	-1.69	-5.63	-7.87	-3.18	-2.51	-0.511	-0.67	-0.961	0.593	-3.74	-2.14	1.05	-1.53	-3	-1.74
-2.98	-1.77	-5.3	-3.16	-5.01	-5.58	-4.04	-3.53	-2.38	-6.53	-1.89	-1.67	-6.03	-8.62	-2.66	-2.63	-0.393	-0.334	-0.147	0.195	-2.89	-2.28	0.869	-1.31	-2.93	-1.68
-3.21	-1.84	-5.03	-3.31	-4.93	-6.18	-3.49	-3.32	-2.78	-6.31	-2.04	-1.45	-5.53	-8.64	-2.16	-2.7	-1.36	-0.385	-0.409	0.217	-3.24	-2.09	0.893	-1.61	-2.99	-2.06
-3	-1.44	-4.64	-3.54	-4.49	-6.46	-3.89	-3.61	-3.08	-6.59	-1.61	-2	-5.08	-8.52	-2.29	-2.04	-1.57	-0.127	-0.288	-0.109	-3.41	-1.75	0.759	-1.32	-3.11	-1.73
-2.65	-1.75	-5.04	-3.26	-4.18	-6.59	-3.96	-2.79	-3.82	-6.75	-2.04	-2.12	-5.25	-8.55	-1.99	-2.35	-0.379	-0.458	-0.851	-0.706	-3.03	-1.53	0.258	-1.39	-3.01	-1.42
-2.74	-1.13	-5.17	-3.19	-4.59	-6.33	-4.18	-1.98	-3.01	-6.57	-2.35	-2.06	-5.53	-8.16	-2.53	-2.55	-0.557	-0.679	-0.292	-0.622	-4.14	-1.73	-0.139	-1.4	-2.56	-1.23
-2.82	-1.11	-5.21	-2.96	-4.45	-6.04	-3.66	-2.28	-2.26	-6.23	-2.51	-1.13	-4.95	-8.48	-3.34	-1.97	-0.934	-1.33	-1.02	-0.932	-3.1	-1.5	-0.218	-1.19	-2.53	-1.9
-3.1	-1.33	-5.42	-2.74	-4.37	-6.69	-3.83	-2.48	-2.63	-6.41	-1.29	-1.64	-5.24	-8.61	-2.58	-2.2	-1.07	-1.44	-0.666	-1.48	-3.44	-1.57	0.125	-1.68	-2.64	-1.84
-2.77	-1.22	-5.77	-2.87	-4.6	-6.91	-3.61	-3.27	-2.27	-7.29	-2	-0.983	-5.61	-8.52	-2.45	-2.23	-0.96	-1.33	-0.654	-1.52	-3.11	-1.73	0.354	-1.27	-2.92	-1.45
-2.75	-1.91	-5.36	-3	-4.04	-6.63	-4.11	-3.29	-2.34	-7.66	-0.448	-2.96	-5.62	-7.43	-2.2	-2.19	-0.808	-1.13	-1.72	-0.924	-2.59	-1.61	-0.00776	-1.16	-2.73	-2.22
-3.01	-0.885	-5.39	-2.63	-4.27	-6.56	-3.98	-3.07	-2.45	-5.96	-1.33	-2.14	-5.04	-8.47	-2.23	-2.24	-0.463	-1.28	-1.64	-1.42	-2.33	-1.75	-0.0611	-1.54	-3.01	-1.9
-3.14	-0.892	-4.8	-2.72	-4.45	-6.7	-3.8	-1.97	-2.63	-6.7	-1.8	-1.83	-4.89	-8.7	-2.24	-3.04	-1.16	-0.904	-1.64	-1.25	-3.01	-1.68	0.167	-1.63	-2.92	-1.83
-2.64	-0.749	-4.72	-3.11	-4.21	-6.81	-3.33	-2.76	-2.59	-6.18	-2.45	-1.78	-5.29	-8.21	-2.64	-2.22	-1.48	-0.819	-1.33	-1.54	-2.63	-1.74	0.11	-1.7	-2.72	-1.52
-2.51	-1.18	-4.97	-3.57	-4.35	-6.9	-3.19	-2.36	-2.66	-6.47	-3.16	-1.39	-5.33	-8.09	-2.87	-2.6	-1.32	-1.23	-1.59	-0.949	-3.73	-1.61	-0.0859	-1.33	-2.72	-2.18
-3.13	-0.653	-4.68	-3.67	-4.68	-6	-2.65	-1.61	-2.24	-6.94	-2.17	-1.75	-4.75	-7.89	-3.23	-2.93	-1.44	-1.21	-1.09	-1.07	-4.1	-1.74	0.176	-1.57	-3.05	-2.05
-3.12	-0.949	-4.28	-3.34	-4.75	-5.3	-3.07	-2.47	-2.89	-5.93	-0.416	-1.18	-5.5	-9.39	-3.32	-2.09	-1.42	-1.37	-1.03	-1.21	-3.51	-1.61	-0.168	-1.65	-3.14	-1.91
-3	-2.02	-4.31	-3.56	-4.23	-6.04	-3.13	-2.24	-3.04	-5.92	-1.49	-1.63	-5.43	-8.8	-3.14	-2.2	-1.45	-1.34	-1.42	-0.846	-3.62	-1.71	-0.121	-1.5	-3.18	-2.07
-2.79	-1.61	-4.22	-2.88	-4.17	-7.45	-3.52	-3.21	-2.7	-6.87	-3.03	-2.33	-5.23	-8.36	-2.73	-2.54	-1.84	-0.956	-1.63	-0.00168	-3.62	-1.83	-0.44	-1.59	-3.09	-1.63
-2.69	-2.46	-4.49	-2.61	-4.37	-7.52	-3.12	-2.07	-2.19	-6.2	-1.16	-2.11	-4.77	-8.11	-2.02	-2.76	-2.06	-1.72	-1.93	-0.281	-4.86	-1.77	-0.583	-1.51	-3	-1.75
-3.14	-3.21	-4.49	-2.79	-4.69	-6.38	-3.21	-3.44	-2.19	-6.39	-2.37	-1.87	-4.69	-7.9	-2.94	-2.47	-1.62	-0.978	-2.25	-0.362	-3.21	-1.54	-0.724	-1.46	-2.77	-1.28
-3.19	-2.43	-4.53	-2.9	-4.29	-6.15	-2.36	-3.9	-1.87	-6.34	-1.32	-0.669	-4.23	-8.3	-2.68	-2.22	-2.59	-0.967	-2.75	-0.222	-2.94	-1.76	-0.716	-1.78	-2.65	-1.67
-3.4	-2.23	-4.53	-2.38	-4.66	-6.1	-2.98	-2.92	-2.22	-6.39	-2.04	-0.455	-4.29	-8.34	-2.49	-2.56	-2.34	-0.937	-1.54	-0.782	-4.09	-1.6	-0.523	-1.92	-2.9	-2
-3.22	-1.35	-4.35	-2.06	-4.84	-6.03	-3.08	-2.95	-2.18	-7.2	-2.43	-1.69	-4.76	-7.82	-2.8	-2.2	-1.71	-0.704	-2.19	-0.622	-3.47	-1.68	-0.0413	-1.84	-2.66	-2.07
-3.61	-1.09	-4.53	-2.28	-4.35	-6.45	-3.25	-2.73	-2.68	-6.97	-2.13	-1.85	-4.65	-8.09	-2.43	-1.94	-2	-0.65	-1.44	-0.382	-3.45	-1.27	-0.502	-1.79	-3.06	-1.24
-3.47	-2	-4.57	-2.09	-4.41	-6.19	-4.03	-1.96	-2.33	-7.06	-1.87	-2.07	-4.41	-8.18	-2.21	-2.59	-2	-0.903	-2.38	-0.221	-2.71	-0.79	-0.618	-1.91	-2.24	-1.84
-3.41	-1.65	-4.4	-2.23	-4.24	-6.02	-4.93	-2.16	-3.02	-6.24	-3.3	-1.59	-4.53	-8.01	-2.3	-2.62	-1.28	-1.42	-1.72	-0.551	-2.81	0.563	-0.57	-1.67	-2.98	-2.29
-2.86	-2.36	-4.32	-2.6	-4.41	-5.79	-4.99	-2.38	-2.38	-7.1	-2	-1.98	-4.22	-7.91	-2.66	-2.49	-0.523	-0.807	-2.5	-0.265	-1.84	1.67	0.0172	-1.71	-2.85	-2.38
-2.89	-2.24	-4.06	-2.39	-4.38	-5.7	-3.69	-2.68	-2.4	-6.8	-0.55	-1.47	-3.93	-8.04	-2.65	-2.38	-0.314	-1.1	-1.96	0.0167	-1.36	1.58	-0.131	-1.2	-3.03	-1.34
-2.85	-2.42	-3.87	-2.85	-4.24	-5.85	-4.52	-2.7	-2.48	-6.78	-1.77	-2.41	-4.33	-8.06	-2.98	-1.58	0.241	-1.53	-1.56	-0.213	-2.74	1.48	0.00199	-1.7	-2.92	-1.65
-3.06	-3.13	-4.02	-2.78	-4.38	-5.13	-2.35	-2.21	-2.36	-6.44	-1.04	-1.97	-3.58	-7.7	-2.49	-1.17	0.226	-1.28	-1.03	0.243	-3.06	1.55	-0.0239	-1.74	-2.66	-2.1
-2.99	-2.97	-3.91	-2.91	-4.37	-6.43	-3.04	-3.36	-2.18	-6.99	-1.63	-1.08	-3.63	-7.44	-2.43	-0.649	-0.327	-0.79	-1.49	-0.29	-1.98	1.35	-0.205	-0.962	-2.57	-1.23
-2.94	-1.61	-4.08	-2.57	-4.35	-6.77	-3.27	-2.92	-2.17	-6.64	-2.31	-0.274	-3.72	-7.94	-2.08	-0.994	0.114	-0.449	-2.57	-0.662	-3.51	1.35	-0.232	-0.254	-2.92	-1.57
-2.52	-0.534	-4.44	-3.63	-4.38	-6.61	-3.85	-1.74	-2.51	-6.7	-2.12	-0.284	-4.01	-8.86	-1.79	-0.994	0.806	-0.42	-4.5	-0.522	-3.22	1.16	-0.35	0.0331	-2.94	-2.59
-2.78	-1.79	-4.56	-3.63	-4.67	-6.01	-3.26	-2.07	-2.56	-6.57	-2.61	-0.77	-3.45	-8.12	-1.9	-1.47	-0.347	-0.871	-3.09	-0.466	-3	0.979	-0.0632	0.495	-3.01	-1.29
-2.88	-0.374	-4.42	-2.51	-4.95	-5.59	-2.82	-2.67	-2.09	-6.36	-2.63	-1.28	-3.72	-7.76	-2.01	-1.88	0.38	-1.07	-2.74	-0.442	-3.15	0.806	-0.316	0.201	-2.9	-1.61
-3.31	-1.21	-4.92	-3.04	-4.95	-6.09	-3.13	-2.74	-2.49	-6.24	-3.92	-1.02	-4.09	-7.7	-2.36	-1.83	-0.639	-1.46	-2.51	0.303	-3.21	0.565	-0.269	-0.152	-2.75	-2.53
-3.13	-2.57	-4.87	-2.83	-4.76	-5.78	-2.99	-2.13	-2.69	-6.04	-2.01	-1.86	-4.27	-7.63	-2.87	-1.42	-0.517	-1.14	-3.6	0.129	-3.15	0.284	-0.397	-0.483	-2.9	-2.3
-2.8	-2.18	-4.77	-2.7	-4.28	-6.27	-4.09	-2.83	-2.54	-6.82	-2.31	-1.02	-4.05	-7.75	-3.13	-2.12	-1.46	-0.619	-2.49	0.201	-4.75	0.128	-0.652	-0.629	-2.92	-1.84
-3.01	-1.18	-4.7	-2.37	-3.8	-6.56	-3.68	-2.05	-2.36	-6.7	-1.48	-1.59	-4.63	-7.56	-2.32	-2.49	-0.974	-0.523	-2.87	-0.166	-3.54	0.14	-0.465	-0.258	-2.68	-0.883
-3.17	-1.49	-4.75	-2.37	-3.74	-6.68	-4.04	-2.3	-2.31	-5.52	-2.85	-2.06	-3.77	-7.73	-3.16	-1.84	-1.47	-0.608	-1.72	0.0276	-2.69	0.155	-0.736	-0.49	-2.75	-0.738
-2.93	-1.46	-4.26	-2.49	-3.78	-6.66	-4.1	-2.62	-2.46	-5.78	-2.59	-1.16	-4.3	-8	-3.04	-1.51	-1.56	-1.13	-1.7	-0.457	-2.32	0.393	-0.727	-0.37	-2.92	-1.55
-2.82	-1.21	-3.73	-2.51	-4.24	-6.12	-3.64	-2.78	-2.33	-5.75	-2.68	-0.456	-3.87	-8.61	-2.65	-1.56	-0.99	-0.59	-1.29	0.306	-3.78	0.293	-0.688	-0.63	-2.88	-1.68
-2.29	-1.5	-3.9	-2.48	-4.41	-6.35	-3.75	-1.26	-1.23	-5.66	-3.1	-1.52	-2.73	-7.65	-2.53	-0.536	-1.45	-1.28	-1.28	-0.0688	-3.17	0.408	-0.443	-0.434	-3.05	-2.28
-2.36	-2.03	-3.88	-2.16	-4.28	-5.56	-3.5	-1.63	-1.8	-6.27	-2.52	-1.71	-2.77	-7.96	-3.2	-1.28	-2.04	-1.23	-0.264	-0.0543	-2.97	0.655	0.0854	-0.576	-2.92	-1.92
-2.67	-1.55	-3.66	-2.4	-4.74	-5.82	-4.26	-2.56	-2.23	-7.25	-1.96	-0.465	-2.65	-7.29	-3.51	-1.34	-1.5	-0.686	0.171	0.188	-2.38	0.245	-0.129	-0.664	-2.79	-1.73
-2.95	-0.467	-3.58	-1.56	-4.71	-6.14	-3.5	-2	-2.2	-5.99	-2.32	-1.86	-2.39	-7.18	-2.73	-1.1	-1.26	-0.759	0.0365	1.05	-2.93	0.358	-0.576	-0.53	-2.45	-1.72
-3.3	-1.31	-3.62	-2.02	-4.28	-6.47	-3.74	-2.45	-2.4	-6.69	-1.76	-2.99	-3.1	-6.75	-2.74	-1.47	-1.16	-0.0736	-1.1	0.773	-2.87	0.339	-0.474	-0.989	-2.96	-1.91
-3.22	-1.35	-3.72	-2.29	-4.26	-5.81	-3.29	-1.15	-2.51	-6.87	-2.61	-0.0665	-2.8	-7.19	-2.51	-1.47	-1.31	-1.13	-2.31	0.0648	-2.04	0.156	-0.582	-0.673	-2.8	-1.46
-2.9	-2.25	-3.78	-2.71	-4.31	-5.28	-3.85	-1.69	-2.71	-7.6	-3.05	-1.2	-3.18	-7.09	-2.55	-1.82	-1.62	-0.8	-1.58	0.863	-3.19	0.131	-0.777	-0.692	-2.68	-0.962
-2.46	-1.61	-3.98	-2.79	-3.8	-6.19	-2.61	-2.24	-2.56	-7.12	-1.63	0.136	-3.51	-7.15	-2.18	-2.02	-0.699	-1.09	-1.61	0.975	-1.97	0.135	-0.714	-0.871	-2.96	-1.41
-2.3	-1.43	-3.7	-2.75	-3.69	-6.02	-3.06	-1.83	-2.44	-7.12	-1.99	-2.06	-3.62	-7.25	-2.42	-2.31	-1.19	-0.941	-1.1	0.611	-2.79	0.122	-0.325	-1.17	-2.79	-2
-2.22	-1.21	-3.93	-2.5	-3.58	-6.02	-3.79	-1.72	-2.86	-7.7	-2.28	-1.43	-3.97	-7.1	-2.37	-2.48	-1.42	-1.05	-0.755	0.632	-2.61	-0.0256	-0.843	-0.888	-2.89	-1.23
-1.99	-1.19	-3.82	-2.68	-3.77	-5.65	-3.97	-2.19	-2.51	-7.1	-1.75	-1.65	-3.87	-7.39	-2.57	-2	0.372	-0.82	-2.45	0.213	-2.52	-0.233	-1.03	-1.34	-2.9	-1.02
-2.4	-2.08	-3.78	-2.98	-4.1	-5.7	-3.69	-2.33	-2.47	-7.17	-0.903	-2.6	-3.99	-7.99	-2.53	-1.94	0.286	-0.872	-1.29	-0.387	-2.1	-0.185	-1.07	-1.18	-3.06	-1.12
-2.47	-1.39	-4.14	-2.77	-4.22	-5.47	-3.08	-1.94	-2.78	-6.68	-1	-1.79	-4.37	-7.16	-2.19	-2.12	1.19	-0.602	-1.48	-0.143	-3.36	-0.186	-1.05	-1.31	-3	-0.907
-2.37	-1.19	-4.21	-2.85	-4.24	-4.99	-3.67	-2.01	-2.75	-7	-1.64	-0.935	-4.15	-5.94	-2.58	-1.87	0.826	-0.492	-0.0365	0.425	-1.54	-0.0933	-0.932	-1.4	-3.11	-1.2
-2.44	-1.55	-4.28	-2.29	-3.67	-4.96	-2.85	-1.43	-2.66	-7.72	-2.34	-1.82	-4.44	-6.36	-2.32	-2.34	1.11	-0.698	-1.26	-0.451	-2.17	-0.178	-1.11	-1.1	-3.07	-1.02
-2.48	-1.89	-3.94	-2.02	-4.11	-5.24	-2.91	-1.01	-2.47	-7.33	-2.63	-2.24	-4.17	-5.14	-2.41	-2.62	1.23	-1.01	0.043	-0.191	-2.72	-0.15	-1.19	-1.2	-2.92	-1.58
-2.37	-2.22	-3.72	-2.84	-3.91	-5.29	-3.33	-0.873	-2.23	-6.81	-2.73	-1.77	-3.36	-5.41	-3.19	-2.75	1.64	-0.794	-0.443	-0.00548	-3.88	-0.45	-1.07	-1	-3.03	-1.18
-2.23	-2.22	-3.6	-3.29	-3.74	-5.32	-2.45	-2.27	-1.83	-5.92	-3.88	-0.215	-2.33	-5.03	-3.5	-2.09	1.07	-0.332	-1.32	0.266	-2.3	-0.495	-1.18	-1.17	-3.03	-1.5
-2.49	-1.15	-3.67	-3.22	-4.04	-5.44	-3.28	-1.96	-1.64	-6.54	-3.13	-0.704	-2.04	-5.17	-3.36	-2.08	0.717	-0.238	-1.52	-0.22	-2.01	-0.611	-1.02	-0.983	-2.73	-0.939
-2.52	-1.27	-3.51	-3.02	-3.97	-5.91	-2.93	-1.86	-1.43	-5.75	-0.722	-1.61	-1.81	-5.5	-2.73	-1.88	1.34	-0.877	-1.64	-0.674	-2.1	-0.276	-1.38	-1.19	-2.76	-1.55
-2.44	-1.71	-3.62	-2.93	-4.15	-5.15	-3.73	-2.38	-2.03	-5	-1.26	-1.97	-2.32	-5.91	-2.34	-2.46	0.839	-1.53	-1.27	-0.0548	-2.47	-0.628	-1.2	-1.11	-2.83	-1.98
-2.1	-1.32	-3.34	-3.31	-3.57	-5.04	-3.29	-2.94	-2.12	-5.84	-1.27	-1.47	-2.73	-6.06	-2.14	-2.54	0.825	-1.33	-1.69	-0.401	-2.53	-0.664	-0.843	-1.42	-2.82	-1.47
-2.31	-2	-3.33	-3.18	-3.57	-4.96	-3.28	-2.08	-1.76	-6.29	-0.61	-0.181	-3.44	-5.99	-2.15	-2.49	1.76	-1.01	-2.87	-0.224	-2.93	-0.453	-0.804	-1.26	-3.19	-1.71
-2.82	-2.28	-3.33	-3.43	-3.38	-5.1	-3.33	-2.33	-0.888	-6.56	-2.45	-0.823	-2.27	-6.88	-2.28	-2.17	0.804	-1.2	-2.39	0.259	-1.39	-0.552	-0.629	-1.07	-2.62	-2.3
-2.41	-2.03	-3.73	-3.27	-3.93	-5.17	-3.96	-2.73	-0.844	-7.3	-1.29	-0.911	-2.39	-7.66	-2.33	-2.4	0.875	-1.18	-2.03	0.256	-2.29	-0.844	-0.318	-1.21	-2.75	-2.09
-2.54	-1.29	-3.52	-3.54	-3.57	-5.17	-3.77	-2.83	-0.746	-6.43	-1.03	-1.55	-2.43	-7.41	-2.29	-2.49	1.29	-1	-1.8	0.556	-3.28	-0.868	-0.97	-1.12	-2.88	-1.28
-2.98	-0.96	-3.63	-3.09	-3.33	-4.99	-3.12	-1.88	-1.1	-6.54	-1.99	-2.06	-2.32	-6.93	-1.89	-1.77	1.11	-0.977	-0.904	1.28	-2.75	-0.844	-0.876	-1.41	-2.96	-0.772
-2.65	-0.438	-3.52	-3.27	-3.28	-4.8	-3.75	-1.68	-1.62	-6.18	-1.41	-2.5	-2.43	-8.01	-2.62	-2.31	1.2	-0.801	-2.29	0.422	-2.63	-0.988	-0.623	-1.45	-2.82	-1.47
-2.95	-1.36	-3.52	-2.47	-3.59	-4.84	-2.88	-2.52	-1.5	-6.51	-0.944	-1.94	-2.56	-8.23	-2.69	-2.09	1.01	-1.3	-1.76	-0.144	-1.95	-0.971	-0.327	-1.34	-2.84	-1.64
-2.98	-2.23	-3.56	-2.68	-3.25	-4.37	-3.25	-2.47	-1.71	-6.59	-1.41	-2.1	-2.01	-7.77	-3.15	-2.02	0.478	-0.913	-2.8	-0.592	-1.64	-1.08	-0.193	-1.39	-3.24	-1.63
-2.91	-2.45	-3.5	-2.59	-3.51	-4.58	-2.14	-2.95	-2.29	-6.8	-2.12	-1.9	-2.17	-7.97	-1.95	-2.46	0.629	-0.637	-3.03	-0.386	-2.2	-1.03	-0.933	-1.51	-2.76	-1.67
-2.69	-2.37	-2.9	-2.94	-3.6	-4.28	-2.63	-1.24	-2.49	-6.84	-2.04	-2.2	-1.71	-7.54	-2.52	-1.87	1.28	-0.978	-3.07	-0.124	-3.21	-1.2	-0.581	-1.42	-2.96	-1.13
-2.84	-1.53	-3.45	-2.83	-3.32	-4.95	-2.95	-2.62	-2	-6.52	-3	-0.733	-1.94	-6.87	-2.29	-1.92	0.654	-0.778	-2.52	0.281	-3.8	-1.16	-0.624	-1.6	-3.39	-1.07
-2.93	-1.86	-3.21	-3.03	-3.3	-4.83	-2.39	-2.42	-1.69	-7.49	-3.14	-1.63	-3.18	-7.55	-2.59	-1.63	0.662	-0.971	-1.86	0.233	-2.87	-1.07	-0.56	-1.94	-2.92	-1.15
-2.78	-1.65	-2.98	-2.9	-3.9	-5.53	-3.13	-2.32	-1.97	-7.69	-1.72	-1.8	-3.28	-7.12	-2.51	-1.78	-0.0387	-0.325	-1.62	-0.307	-1.76	-1.35	-0.845	-1.81	-3.03	-1.16
-2.85	-1.15	-3.37	-2.45	-3.47	-5.37	-3.19	-2.71	-2.02	-7.69	-2.49	-2.17	-3.47	-6.39	-2.73	-1.59	0.0847	-0.49	-0.806	0.2	-3.51	-1.33	-0.73	-1.97	-2.88	-1.72
-3.09	-0.667	-3.44	-2.62	-3.33	-5.17	-3.84	-3.03	-2.49	-7.14	-0.703	-1.17	-3.59	-6.52	-2.51	-1.89	-0.646	-0.609	-1.81	0.0396	-3.57	-1.58	-0.431	-1.75	-3.28	-1.67
-3.17	-0.214	-3.4	-2.89	-3.35	-5.15	-3.91	-2.57	-2.48	-7.68	-1.83	-2.46	-3.37	-6.09	-2.91	-2.34	-0.128	-1.06	-2.34	-0.0186	-3.17	-1.64	-0.638	-2.01	-3.09	-2.46
-3.4	0.323	-3.3	-2.74	-3.11	-5.4	-3.53	-3.34	-1.75	-8.08	-0.879	-1.66	-2.69	-5.93	-2.87	-1.68	0.815	-1.57	-2.67	-1.21	-2.7	-1.53	-0.419	-1.87	-2.7	-2.16
-3.43	-0.0801	-3.45	-2.11	-3.69	-4.81	-3.81	-3.23	-1.86	-7.13	-1.66	-1.84	-3.35	-6.48	-2.41	-2.46	0.375	-0.747	-2.05	-1.02	-2.98	-1.39	-0.513	-1.78	-2.96	-2.01
-2.8	0.0877	-3.27	-2.6	-3.69	-4.43	-3.71	-2.98	-1.96	-6.97	-2.61	-0.586	-3.07	-6.28	-2.76	-2.45	0.424	-0.88	-1.48	-0.493	-1.79	-1.44	-0.911	-1.83	-3.25	-2.34
-2.64	0.676	-3.38	-2.61	-2.83	-3.61	-2.96	-2.77	-2.25	-6.68	-1.28	-1.75	-3.65	-6.94	-2.25	-2.49	0.661	-1.05	-1.02	-0.434	-1.78	-1.45	-0.903	-2.15	-3.23	-2.22
-2.84	0.343	-3.33	-2.1	-2.85	-4	-3.18	-2.76	-1.75	-6.45	-2.25	-1.72	-3.79	-7.3	-1.95	-2.42	0.742	-1.31	-1.89	-0.365	-1.78	-1.61	-1.15	-1.93	-3.38	-1.98
-3.1	-0.27	-3.56	-2.68	-3.16	-4.62	-3.38	-2.03	-1.71	-6.15	-2.05	-0.173	-2.98	-6.44	-2.66	-2.16	0.115	-1.28	-1.42	0.0415	-2.1	-1.26	-0.917	-1.86	-3.18	-1.88
-3.1	-0.326	-3.38	-2.62	-2.99	-4.8	-3.92	-1.71	-2.07	-6.77	-1.58	-1.97	-2.99	-5.77	-2.93	-1.97	0.428	-0.447	-2.1	-0.0944	-2.2	-0.976	-1.18	-1.63	-3.32	-2.31
-3.26	-0.375	-3.36	-2.82	-3.24	-4.22	-3.48	-1.66	-2.14	-6.83	-0.905	-2.02	-3.23	-5.93	-2.08	-2.49	-0.0332	-0.766	-2.16	-0.0169	-2.2	-1.16	-0.994	-1.81	-2.89	-1.87
-3.04	-0.658	-3.28	-2.6	-3.55	-4.4	-2.64	-1.6	-1.77	-7.35	-1.89	-1.32	-3.97	-6.1	-2.19	-2.75	0.972	-1.06	-2.47	-0.359	-2.78	-1.37	-1.09	-1.76	-2.14	-1.66
-2.77	-0.218	-3.38	-2.12	-3.23	-4.3	-3.07	-2.98	-1.75	-5.87	-1.94	-1.73	-4.14	-6.18	-2.76	-2.42	0.829	-0.406	-1.69	0.403	-2.33	-1.25	-0.684	-1.84	-2.16	-2.12
-2.8	0.218	-3.31	-2.78	-3.37	-4.27	-4.07	-2.64	-1.46	-6.88	-1.96	-1.97	-4.28	-6.19	-2.72	-2.27	-0.0364	-0.643	-1.66	0.566	-1.33	-1.19	-0.675	-1.69	-1.9	-2.49
-3.05	0.119	-3.39	-2.5	-2.91	-3.72	-4.01	-2.96	-1.26	-7	-0.972	-2.6	-4.07	-6.89	-2.62	-2.69	0.587	-0.917	-2.24	0.193	-1.55	-1.42	-0.632	-1.51	-2.18	-2.01
-2.73	0.165	-2.9	-2.57	-3.2	-4.05	-2.83	-3.45	-1.39	-7.55	-1.61	-1.29	-4.08	-7.04	-2.06	-2.91	-0.129	-0.759	-1.3	0.195	-1.69	-1.43	-0.643	-1.48	-1.95	-1.84
-2.4	-0.11	-2.92	-2.26	-3.3	-4.27	-3.57	-3.38	-1.58	-7.7	-1.15	-0.644	-4.48	-7.08	-2.55	-3	-0.033	-0.849	-1.96	0.722	-1.29	-1.44	-0.649	-1.59	-2.13	-2.03
-2.66	-0.569	-2.89	-2.32	-3.23	-4.01	-2.67	-3.58	-1.52	-7.66	-2.55	-0.88	-3.59	-5.99	-2.54	-2.99	-0.617	-1.29	-2.13	0.422	-2.07	-1.39	-1.17	-1.77	-2.1	-2.23
-2.51	0.0335	-2.89	-2.02	-3.73	-4.51	-3.03	-2.5	-0.966	-7.65	-0.975	-0.742	-3.86	-6.25	-2.51	-2.76	-0.356	-0.991	-1.69	0.364	-1.79	-1.39	-1.24	-1.81	-2.31	-2.28
-2.2	0.339	-2.94	-2.42	-3.42	-4.79	-2.13	-1.43	-0.677	-7.22	-1.6	-0.753	-4.08	-5.84	-2.04	-2.86	0.176	-1.07	-2.12	-0.675	-2.97	-1.24	-1.25	-1.5	-2.66	-2.29
-2.45	0.394	-2.89	-3.29	-3.29	-4.99	-3.34	-1.96	-0.823	-6.82	-2.05	-1.66	-4.9	-6.53	-2.1	-3.32	0.0837	-1.52	-2.3	-0.38	-2.6	-1.41	-0.883	-1.95	-2.64	-2.49
-2.46	-0.683	-3.15	-3.56	-3.31	-4.45	-2.49	-1.37	-1.02	-6.62	-1.74	-2.57	-4.78	-8.08	-2.78	-2.95	-1.38	-1.33	-2.53	-0.497	-2.77	-1.51	-0.974	-1.76	-2.75	-2.37
-2.15	-0.959	-3.02	-2.31	-3.39	-4.36	-3.72	-1.65	-1.26	-6.54	-1.75	-2.23	-4.19	-7.47	-2.53	-2.56	-0.661	-1.55	-2.02	-0.216	-2.71	-1.47	-1.03	-1.55	-2.84	-2.6
-2.3	-1.02	-3.4	-2.18	-3.74	-4.35	-4.13	-2.61	-1.1	-7.11	-3.16	-1.7	-4.36	-6.1	-2.43	-2.12	-0.999	-1.18	-1.73	-0.801	-2.5	-1.44	-1.29	-1.63	-2.49	-2.58
-2.38	-0.993	-3.25	-2.67	-3.6	-4.89	-2.89	-1.51	-0.793	-5.88	-2.52	-0.884	-4.26	-6.21	-2.64	-2.56	-1.8	-0.893	-1.93	-0.534	-2.23	-1.52	-1.05	-1.76	-2.58	-2.61
-1.99	-0.985	-2.95	-2.05	-4.1	-4.38	-3.86	-2.32	-1.12	-6.8	-1.98	-1.01	-4.32	-6.7	-3	-2.16	-1.07	-1.51	-3.04	0.0997	-3.79	-1.54	-0.661	-1.74	-2.62	-2.26
-2.16	-0.986	-3.37	-2.37	-4.02	-5.41	-3.37	-1.13	-1.02	-6.01	-3.38	-1.42	-3.53	-6.73	-2.67	-1.95	-1.07	-1.37	-1.74	0.31	-1.99	-1.48	-0.701	-1.91	-3.14	-2.07
-2.55	-0.849	-3.59	-2.54	-4.33	-5.39	-3.63	-2.68	-1.18	-6	-3.06	-2.12	-4.46	-7.14	-2.92	-2.57	-1.33	-1.36	-1.32	0.417	-1.87	-1.64	-0.868	-1.61	-2.77	-2.22
-2.59	-0.439	-3.76	-2.64	-4.25	-5.07	-4.14	-2.06	-1.34	-6.9	-2.57	-2.73	-3.78	-6.72	-3.02	-2.81	-1.08	-1.37	-1.73	0.0272	-2.41	-1.67	-1.04	-2.12	-2.69	-1.68
-2.45	-0.0919	-3.17	-2.73	-3.63	-4.94	-4.23	-2.18	-1.85	-7.19	-1.24	-2.41	-3.59	-5.88	-2.5	-2.6	-1.6	-1.1	-2.32	-0.148	-2.43	-1.69	-1.35	-1.75	-2.33	-1.71
-2.97	-0.83	-3.29	-1.96	-3.22	-5.62	-2.96	-2.27	-2	-7.73	-2.2	-1.44	-4.04	-6.58	-3.22	-2.52	-1.06	-1.08	-1.44	0.438	-2.41	-1.78	-0.923	-1.94	-2.42	-1.38
-2.77	-0.968	-3.5	-2.27	-2.93	-4.5	-2.7	-1.42	-1.55	-6.94	-2.68	-1.97	-4.5	-7.16	-2.41	-2.64	-0.621	-1.76	-2.74	0.125	-2.31	-1.45	-1.01	-1.86	-2.82	-2.08
-3.01	-0.822	-3.3	-2.3	-3.01	-5.06	-2.39	-1.66	-1.49	-6.83	-2.49	-1.45	-4.52	-7.2	-2.07	-2.76	0.526	-1.48	-1.62	0.033	-3.04	-1.2	-1.37	-1.94	-2.83	-2.42
-2.71	-0.272	-3.28	-2	-3.01	-5.31	-3.92	-2.39	-1.71	-6.56	-2.02	-2.03	-4.67	-6.37	-1.97	-3.01	-0.883	-1.87	-1.67	-0.411	-3.39	-1.43	-0.575	-1.54	-3.23	-1.77
-2.62	-1.51	-3.24	-1.58	-3.05	-5.7	-3.2	-3.09	-1.74	-6.53	-2.59	-2.28	-4.66	-6.42	-2.65	-2.35	-0.789	-1.44	-2.5	-0.659	-2.69	-1.23	0.505	-1.9	-2.71	-2.84
-2.98	-0.966	-3.18	-2.01	-3.21	-5.3	-2.77	-2.58	-1.55	-6.89	-2.56	-2.4	-4.7	-5.7	-1.97	-2.39	-0.613	-1.54	-3.08	-0.0555	-2.36	-1.23	1.32	-1.7	-2.64	-3.19
-2.87	-1.07	-3.52	-2.16	-3.54	-4.85	-3.38	-2.7	-1.64	-7.06	-2	-3.47	-4.75	-5.89	-2.27	-2.08	-1.79	-1.54	-3.18	0.838	-2.07	-1.51	2.01	-1.34	-2.62	-2.13
-2.89	-1.08	-3.37	-2.76	-3.16	-4.72	-2.35	-2.44	-1.79	-5.61	-1.11	-3.34	-4.99	-6.47	-2.91	-2.5	-1.7	-1.81	-2.42	-0.0769	-0.797	-1.69	1.6	-0.448	-2.34	-0.722
-2.95	-0.335	-3.65	-2.38	-3.52	-5.12	-3.06	-2	-2.02	-6.43	-1.28	-3.38	-4.73	-7.34	-2.5	-2.55	-1.63	-1.17	-2.84	-0.363	-0.417	-1.47	1.41	-0.691	-1.39	-1.52
-3.18	-1.33	-3.54	-1.96	-3.35	-5.11	-3.42	-1.42	-2.1	-6.59	-1.58	-0.876	-4.16	-6.29	-2.47	-3.06	-1.61	-1.45	-2.8	-0.322	-2.5	-1.72	1.28	-0.912	-1.25	-1.43
-3.25	-1.69	-3.52	-1.66	-3.41	-4.68	-3.6	-2.27	-1.59	-6.17	-3.43	-1.38	-4.01	-6.39	-2.78	-3.22	-1.03	-1.87	-2.37	-0.382	-2.43	-1.57	0.98	-0.935	-1.58	-1.84
-3.38	-1.96	-3.57	-1.71	-3.37	-4.65	-3.15	-2.71	-1.54	-5.23	-3.25	-1.44	-4.45	-7.53	-3.28	-1.81	-1.67	-1.66	-2.87	-0.317	-2.2	-1.55	0.866	-0.718	-1.11	-1.9
-3.24	-1.79	-3.72	-1.95	-4.2	-4.5	-3.88	-2.76	-1.49	-6.24	-2.53	-1.7	-4.61	-7.6	-2.54	-2.31	-1.86	-1.48	-2.71	-0.225	-2.42	-1.58	0.68	-1.11	-1.09	-1.61
-3.11	-0.606	-3.48	-1.81	-4.38	-4.48	-3.19	-3.15	-1.5	-6.51	-3.63	-3.57	-5.62	-7.03	-2.67	-2.42	-1.56	-1.43	-2.23	-0.889	-1.47	-1.56	0.838	-1.05	-0.969	-0.229
-3.37	-0.683	-3.71	-1.8	-4.27	-3.97	-3.73	-2.86	-1.45	-6.26	-1.69	-2.52	-5.23	-7.05	-2.44	-2.08	-1.79	-1.25	-2.2	-0.189	-1.61	-1.48	0.844	-1.13	-1.15	-0.562
-2.86	-1.36	-4.12	-2.24	-4.51	-3.79	-3.25	-3.68	-1.93	-6.84	0.211	-3.04	-5.76	-6.45	-2.36	-2.38	-1.97	-0.819	-2.14	-0.136	-2.29	-1.48	1.06	-1.24	-1.47	-0.418
-3.26	-1.36	-3.58	-2.2	-4.63	-4.37	-3.01	-4.2	-2.16	-6.9	-1.09	-2.7	-4.49	-6.01	-2.58	-3.52	-2.03	-0.825	-1.24	-0.0855	-1.81	-1.69	0.495	-1.37	-1.73	-0.204
-2.9	-1.77	-3.48	-2.83	-3.92	-4.62	-4.76	-3.75	-1.97	-5.62	-2.55	-1.57	-4.58	-6.39	-2.79	-2.55	-1.24	-0.717	-0.895	-0.613	-1.35	-1.41	0.515	-1.27	-1.44	-0.475
-3.02	-2.18	-3.08	-1.98	-4.25	-4.4	-3.74	-3.54	-1.52	-5.81	-3.61	-1.24	-4.34	-6.53	-3.3	-2.44	-1.21	-0.501	-1.22	0.0211	-1.57	-1.41	0.42	-1.32	-1.64	-0.691
-2.8	-1.59	-2.77	-2.14	-4.08	-4.02	-3.46	-3.09	-1.94	-6.14	-2.46	-2.58	-3.05	-7.05	-3.15	-2.29	-1.13	-0.409	-1.61	-0.298	-1.36	-1.53	0.566	-1.23	-1.32	-0.914
-3.06	-1.12	-2.78	-3.23	-3.85	-3.71	-3.62	-2.52	-2.18	-6.62	-0.506	-2.99	-3.64	-7.74	-2.53	-2.1	-1.76	-0.91	-0.946	-0.15	-2.03	-1.5	0.431	-1.41	-1.23	-1.09
-2.82	-1.06	-2.93	-2.61	-4.29	-3.55	-3.34	-3.4	-2.63	-5.25	-1.49	-1.63	-3.26	-7.6	-2.56	-1.73	-2.25	-0.95	-0.887	0.433	-2.25	-1.33	0.599	-1.25	-1.21	-1.13
-2.4	-0.0684	-3.02	-2.46	-4.52	-3.37	-3.29	-2.98	-1.91	-5.74	0.01	-1.82	-3.4	-6.69	-2.84	-1.83	-1.88	-1.22	0.483	-0.331	-3.36	-1.5	0.557	-1.34	-1.45	-0.537
-2.15	-0.482	-3.3	-2.69	-5	-4.48	-3.37	-3.54	-2.34	-6.35	-0.257	-1.99	-3.91	-7.25	-2.79	-1.94	-1.99	-1.46	-0.808	-0.139	-2.29	-1.6	0.195	-1.32	-2	-1.82
-2.21	-0.533	-3.14	-2.53	-4.91	-4.9	-2.65	-4.49	-2.06	-5.72	-0.48	-1.06	-3.79	-6.14	-3.1	-2.07	-2.1	-0.483	-0.83	-0.0259	-2.44	-1.46	0.18	-1.2	-2.05	-1.56
-2.49	-1.11	-3.15	-2.8	-4.13	-4.9	-3.38	-3.5	-2.07	-6.22	-0.69	-1.4	-3.71	-5.33	-3.1	-1.77	-1.69	-0.776	0.104	-0.304	-1.53	-1.47	0.528	-1.19	-2.16	-0.767
-2.34	-1.23	-3.1	-2.25	-3.5	-4.51	-3.61	-4.83	-1.63	-6.93	-1.69	-2.03	-4.09	-5.65	-2.98	-2	-1.47	-0.972	0.0303	-0.409	-1.38	-1.5	0.125	-0.802	-2.01	-0.743
-2.26	-1.9	-3.24	-2.14	-3.43	-4.43	-3.56	-4.52	-1.36	-7.45	-0.623	-1.67	-4.53	-6.24	-3.4	-2.12	-1.8	-0.891	-0.878	-0.282	-1.94	-1.34	0.386	0.373	-2.46	-0.808
-2.53	-0.716	-3.46	-3.01	-3.91	-4.46	-4.16	-3.86	-1.77	-6.56	-0.359	-0.71	-4.69	-6.32	-2.85	-2.69	-1.86	-0.874	-0.325	0.341	-0.707	-1.49	0.297	0.322	-2.13	-1.16
-2.48	-1.35	-3.34	-3.03	-3.85	-3.96	-4.03	-3.89	-2.11	-7.41	-0.319	-1.73	-3.49	-6.27	-3.24	-2.41	-1.45	-0.677	-0.397	0.524	-3.04	-1.58	0.13	0.0816	-1.9	0.486
-2.21	-0.995	-3.54	-3.15	-3.92	-4.56	-4.25	-4.51	-1.65	-7.71	-2.67	-0.816	-4.01	-6.56	-2.83	-1.97	-0.737	-0.838	-0.693	-0.0287	-2.98	-1.54	0.0561	-0.0223	-1.71	-0.349
-2.26	-1.31	-3.58	-3.01	-3.82	-4.34	-2.8	-4.65	-1.94	-7	-2.64	0.0967	-4.35	-6.81	-2.72	-1.62	-1.17	-0.804	-1.28	-0.319	-2.33	-1.5	-0.411	0.0147	-1.71	-0.808
-2.21	-1.55	-3.31	-3.68	-4.32	-4.74	-2.7	-5.16	-1.87	-6.73	-2.43	-1.28	-4.17	-6.22	-2.47	-1.96	-1.04	-0.616	-0.338	-0.23	-2.16	-1.7	-0.548	0.352	-1.72	-1.1
-2.43	-1.91	-3.29	-3.14	-3.89	-4.58	-2.46	-4.87	-1.31	-7.36	-0.629	-2.52	-4.05	-6.46	-2.93	-2.42	0.153	-0.914	-1.14	0.106	-1.74	-1.63	-0.704	0.22	-2.24	-1.73
-2.78	-1.4	-3.18	-3.08	-3.65	-4.73	-3.31	-3.45	-1.9	-6.72	-1.9	-2.75	-3.88	-6.67	-3.63	-2.27	-0.958	-0.86	-1.48	0.937	-2.27	-1.58	-0.621	0.187	-2.28	-1.14
-2.68	-1.43	-3.3	-2.52	-3.99	-5.08	-4.06	-4.69	-2.56	-8.01	-2.16	-1.85	-4.26	-6.67	-3.19	-2.14	-0.963	-0.844	-2.36	1.52	-1.61	-1.31	-0.893	0.225	-2.37	-1.49
-2.75	-1.47	-3.42	-2.51	-3.55	-4.91	-3.23	-4.85	-2.62	-6.9	-3.32	-2.2	-3.94	-5.71	-3.05	-2.03	-0.631	-0.821	-2.03	0.879	-1.66	-1.32	-0.745	0.182	-2.4	-1.36
-2.27	-0.943	-3.45	-2.77	-3.55	-5.62	-1.66	-5.49	-2.69	-6.98	-2.23	-2.37	-4.81	-4.96	-2.94	-2.04	-0.849	-1.02	-2.63	0.346	-3.64	-1.26	-1.01	-0.28	-2.23	-1.46
-2.64	-1.19	-3.46	-2.79	-4.23	-5.02	-2.71	-5.82	-3.04	-6.84	-1.54	-1.56	-4.35	-4.12	-2.47	-2.05	-0.793	-0.392	-2.78	0.625	-2.26	-1.26	-0.77	-0.437	-2.26	-1.16
-2.36	-1.78	-3.29	-2.67	-4.47	-3.68	-2.31	-5.29	-2.36	-6.15	-1.82	-0.967	-4.54	-4.55	-2.42	-1.72	-1.17	-0.476	-1.36	-0.733	-3.01	-1.09	-1.08	-0.164	-2.23	-1.68
-2.68	-0.641	-3.32	-2.36	-4.59	-2.25	-2.41	-3.37	-1.88	-6.67	-0.971	-2.07	-4.79	-5.53	-1.98	-2.79	-1.46	-0.824	-1.49	-0.157	-1.54	-1.26	-1.22	-0.0202	-2.32	-1.18
-2.81	-0.284	-3.48	-2.67	-4.43	-2.75	-2.78	-3.5	-2.35	-6.02	-2.37	-1.82	-3.98	-5.87	-3.05	-2.36	-1.14	-1.19	-0.288	-0.626	-1.76	-1.38	-1.27	-0.248	-2.56	-1.69
-2.65	-1.2	-3.37	-2.65	-4.46	-2.35	-2.22	-4.21	-2.85	-6.18	-2.76	-1.55	-4.48	-6.54	-3.55	-2.23	-2.01	-1.4	-0.919	-0.635	-2.27	-1.54	-0.938	-0.405	-2.46	-1.49
-2.57	-0.753	-3.37	-2.84	-4.11	-2.78	-2.48	-5.25	-3.59	-6.74	-2.02	-2.21	-5.01	-5.13	-3.64	-2.09	-1.95	-1.07	-1.3	-0.661	-3.5	-1.53	-0.922	-0.513	-2.62	-1.84
-1.97	0.0183	-3.65	-2.64	-4.06	-3.24	-2.66	-3.18	-3.5	-6.11	-1.31	-2.5	-4.17	-5.21	-3.86	-2.14	-2.48	-0.105	-1.95	-0.394	-3.35	-1.19	-0.658	-0.481	-2.41	-1.48
-2.42	-0.973	-3.12	-2.91	-4.58	-2.96	-1.9	-2.41	-3.03	-5.31	-1.56	-1.36	-5.04	-6.23	-3.37	-2.11	-2.71	-0.508	-1.81	-0.186	-2.42	-1.52	-1.02	-0.789	-2.04	-1.61
-2.21	-1.97	-2.53	-2.92	-4.66	-2.94	-1.36	-3.21	-3.19	-6.1	-1.42	-1.98	-4.55	-7.02	-3.53	-2.4	-2.39	-0.652	-3.04	0.359	-2.85	-1.67	-0.795	-0.896	-2.58	-1.6
-2.25	-0.625	-2.32	-2.77	-4.87	-2.59	-0.886	-3.77	-2.06	-6.4	-1.24	-1.56	-3.76	-6.41	-3.62	-2.87	-2.27	-0.355	-2.45	0.323	-2.68	-1.6	-0.891	-0.894	-2.51	-1.09
-2.14	-1.02	-2.37	-2.1	-4.56	-2.93	-2.34	-3.94	-1.45	-6.51	-2.73	-1.06	-3.8	-6.21	-2.52	-3.13	-2.55	-0.342	-3.09	0.179	-1.65	-1.46	-0.603	-0.942	-2.44	-1.53
-2.01	-0.889	-2.43	-1.71	-4.67	-3.62	-2.42	-3.72	-1.61	-5.61	-1.39	-2.17	-4.06	-5.8	-2.68	-3.23	-3.22	-0.31	-0.824	0.314	-1.64	-1.64	-0.782	-0.693	-2.71	-1.67
-2.32	-0.889	-2.47	-2.49	-4.42	-3.52	-1.6	-3.72	-2.11	-5.92	-1.07	-2.63	-4.09	-4.23	-3.38	-2.28	-3.18	-0.925	-0.0864	0.288	-1.23	-1.2	-0.641	-0.613	-2.66	-1.65
-2.05	-1.56	-2.55	-1.81	-4.33	-4.07	-2.75	-3.25	-2.25	-6.92	-1.22	-2.56	-4.11	-3.95	-3.07	-2.42	-2.04	-0.49	-0.42	0.428	-2.5	-1.62	-0.906	-0.54	-2.42	-1.81
-2.06	-0.0446	-2.54	-2.43	-4.6	-3.15	-2.87	-1.91	-2.26	-6.16	-1.58	-2.71	-3.88	-4.79	-2.99	-2.3	-1.8	-0.505	-0.528	0.296	-1.53	-1.73	-0.97	-0.867	-2.41	-1.78
-2.13	-0.475	-2.74	-2.43	-4.78	-4.21	-3.03	-3.19	-2.29	-6.88	-2.23	-1.98	-4.39	-4.18	-3.04	-3.07	-1.43	-0.865	0.0125	0.0734	-2.27	-2.03	-1.35	-0.68	-2.37	-1.67
-1.68	-0.418	-2.76	-2.79	-4.29	-4.51	-2.26	-3.23	-2.25	-5.96	-1.47	-1.72	-4.7	-4.09	-2.45	-2.44	-1.47	-0.853	-1.05	0.264	-2.19	-1.98	-0.592	-0.966	-2.11	-1.01
-2.19	-0.788	-2.85	-3.58	-4.15	-4.41	-2.47	-2.64	-1.56	-6.5	-1.14	-2.63	-4.57	-4.81	-2.89	-2.82	-2.26	-0.628	-0.774	0.596	-1.48	-1.75	-0.891	-0.959	-2.11	-1.28
-1.99	0.938	-2.94	-3.39	-4.34	-4.85	-0.771	-3.93	-1.74	-5.6	-2.23	-1.53	-4.76	-4.35	-2.81	-2.38	-2.11	-0.936	-1.18	0.815	-1.41	-1.56	-0.73	-0.854	-2.52	-1.36
-2.22	-0.437	-2.71	-2.93	-4.57	-4.76	-1.57	-3.3	-2.19	-6.14	-0.862	-2.1	-5.12	-5.5	-2.92	-2.5	-2.35	-0.7	-1.79	-0.229	-1.44	-1.92	-0.973	-0.852	-2.32	-1.28
-2.21	0.16	-2.96	-2.66	-4.76	-4.44	-2.27	-2.7	-2.39	-6.79	-0.592	-2.18	-4.57	-5	-2.95	-3.07	-1.45	-0.73	-1.88	0.285	-3.4	-1.72	-1.01	-1.12	-2.19	-1.55
-1.32	0.447	-2.88	-2.95	-4.28	-4.45	-1.34	-1.98	-2.07	-5.92	-2.59	-1.4	-4.56	-6.05	-2.4	-3.15	-2.42	-0.857	-2.27	0.279	-3.07	-1.57	-0.759	-1.04	-1.87	-1.77
-1.77	0.434	-3.03	-3.26	-4.24	-4.61	-1.32	-0.41	-2.52	-6.3	-2.48	-0.632	-4.75	-5.79	-2.76	-2.01	-2.45	-1.01	-1.09	0.141	-2.19	-1.09	-0.923	-1.17	-1.88	-1.71
-1.72	0.892	-3.24	-3.28	-4.31	-5.07	-1.97	-0.834	-1.99	-4.97	-1.92	-1.74	-4.05	-5.27	-3.09	-2.19	-2.47	-0.808	-0.443	-0.0395	-2.15	-1	-0.702	-0.544	-1.91	-1.68
-2.43	-0.733	-3.2	-2.8	-4.36	-4.11	-1.46	-2.33	-2.9	-6	-1.22	-0.559	-4.8	-4.71	-3.45	-2.7	-2.51	-1.08	-0.269	-0.244	-1.62	-1.08	-1.02	-0.58	-2.22	-1.75
-1.82	-0.128	-3.23	-2.66	-4.33	-4.3	-1.65	-2.57	-2.63	-4.66	-1.32	-2.62	-4.24	-4.21	-3.14	-2.85	-2.66	-0.819	-0.427	0.0695	-1.76	-1.22	-0.89	-0.519	-2.17	-1.95
-1.35	1.25	-3.24	-2.55	-5.01	-3.76	-2.57	-2.52	-2.56	-5.62	-2.09	-2.03	-3.79	-5.16	-3.05	-2.56	-2.05	-1.02	-1.75	-0.147	-2.5	-1.17	-0.807	-0.497	-2.2	-2.14
-1.64	-0.41	-3.49	-3.17	-5.06	-3.54	-1.81	-1.72	-2.54	-6.3	-1.51	-3.22	-4.19	-5.66	-3.01	-2.69	-1.94	-1.08	-1.34	-0.299	-2.04	-1.1	-0.925	-0.504	-2.46	-2.09
-1.82	-0.48	-2.9	-2.61	-4.95	-3.6	-2	-1.89	-2.52	-6.54	-2.05	-1.55	-4.44	-4.76	-3.1	-3.18	-1.6	-0.967	-1.48	-0.23	-2.41	-1.17	-1.01	-1.04	-2.36	-2.12
-1.69	-0.203	-3.21	-2.39	-5.02	-3.75	-1.03	-2.12	-1.46	-6.36	-1.93	-0.905	-4.66	-5.03	-1.72	-2.69	-1.75	-0.584	-0.973	0.0911	-1.5	-1.09	-0.913	-0.575	-2.11	-1.53
-1.5	-0.464	-3.01	-2.12	-3.97	-4.65	-1.42	-2.61	-1.73	-6.41	-1.74	-2.19	-3.79	-4.01	-1.33	-2.55	-2.27	-0.762	-1.11	0.0421	-2.32	-1.28	-0.814	-0.997	-2.37	-1.19
-1.71	0.157	-2.91	-2.22	-3.11	-4.43	-1.83	-4.2	-2.85	-5.98	-1.74	-0.593	-3.81	-3.39	-1.6	-1.89	-2.27	-0.95	-0.737	-0.114	-2.95	-0.835	-1.15	-0.727	-2.02	-1.28
-1.34	0.293	-3.06	-1.97	-3.92	-4.56	-1.37	-3.86	-2.4	-6	-1.43	-2.09	-4.24	-2.72	-1.73	-2.22	-3.13	-0.489	-0.707	0.0251	-1.9	-0.804	-1.18	-1.01	-1.75	-1.39
-1.67	-0.722	-3.05	-1.94	-3.82	-5.11	-2.24	-4.14	-2.7	-6.62	-1.44	-1.8	-4.08	-4.15	-1.88	-2.25	-2.02	0.0997	-0.467	-1.36	-2.07	-0.746	-1.15	-0.714	-1.95	-1.47
-1.27	-0.365	-3.05	-2.02	-3.46	-4.94	-2.9	-2.68	-2.81	-5.64	-0.981	-2.91	-4.25	-4.24	-1.85	-3.27	-2.08	0.114	-1.51	-1.51	-1.36	-0.772	-1.83	-0.81	-1.67	-1.49
-1.19	-0.863	-3.05	-2.49	-3.53	-4.57	-1.9	-2.46	-2.91	-5.86	0.0677	-1.84	-4.41	-4.87	-1.93	-2.4	-1.92	-0.15	-1.78	-1.44	-1.28	-0.708	-1.71	-0.712	-0.564	-2
-1.1	0.448	-3.17	-2.56	-3.6	-5.34	-1.95	-3.11	-2.45	-5.29	-1.56	-2.67	-4.41	-3.89	-2.04	-3.35	-2.44	-0.285	-1.57	-1.85	-2.17	-0.727	-1.9	-1.06	-0.319	-1.19
-0.827	0.0578	-3.13	-2.67	-3.92	-6.15	-1.82	-2.52	-2.72	-5.79	-0.596	-2.87	-4.16	-4.55	-2.39	-2.92	-2.07	-0.116	-1.05	-1.46	-1.07	-0.957	-1.5	-0.845	-0.607	-2.54
-1.27	0.705	-3.22	-3.17	-4.25	-6.02	-1.49	-2.35	-2.41	-6.22	-0.674	-3.49	-4.27	-5.29	-1.79	-3.53	-2.09	-0.222	-0.597	-1.02	-1.38	-1.02	-1.63	-0.906	-0.594	-1.98
-1.27	-0.693	-3.17	-3.15	-4.61	-5.61	-0.675	-2.46	-2.03	-6.33	-1.81	-1.71	-3.74	-5.03	-2.43	-3.63	-2.65	-0.472	-0.432	-0.966	-1.18	-0.907	-1.48	-0.827	-0.796	-2.6
-1.54	-0.0206	-3.67	-3.25	-4.79	-4.14	-1.39	-3.5	-2.36	-5.68	-0.68	-1.16	-4.14	-5.45	-2.41	-3.37	-1.89	-0.643	-0.386	-0.964	-1.69	-0.783	-0.677	-1.13	-0.854	-2
-2.09	0.0224	-3.67	-3.29	-4.57	-4.4	-1.43	-3.75	-1.26	-5.21	-2.41	-2.02	-4.17	-3	-2.17	-2.35	-1.75	-1.08	-1.23	-0.0342	-2.41	-0.925	-1.18	-1.13	-1.03	-1.94
-1.95	-1.55	-3.46	-2.95	-4.26	-4.51	-0.658	-2.06	-1.19	-4.36	-1.99	-0.804	-3.66	1.29	-1.98	-2.59	-2.43	-0.86	-1.43	-0.265	-0.604	-0.95	-1.05	-0.954	-1.07	-2.27
-2.08	-0.789	-3.58	-2.66	-3.45	-5.52	-1.47	-2.38	-1.73	-5.65	-2.29	-1.77	-4.06	1.54	-1.81	-2.14	-2.11	-0.888	-0.192	-0.11	-1.72	-0.981	-1.11	-1.12	-0.981	-2.26
-1.39	-1.37	-3.61	-2.86	-3.55	-5.03	-2.38	-2.06	-1.65	-5.28	-1.22	-2.25	-4.18	1.49	-2.11	-2.11	-1.93	-0.955	-0.666	-0.666	-0.799	-1.12	-0.874	-1.15	-0.895	-2.88
-1.14	-0.669	-3.76	-3.83	-3.98	-4.33	-0.531	-1.52	-1.2	-5.06	-1.51	-1.56	-4.16	1.72	-2.12	-2.59	-2.4	-0.946	-0.893	-0.892	-1.91	-1.29	-0.882	-1.01	-0.8	-2.33
-1.3	-1.13	-3.72	-3.03	-4.61	-4.46	-1.02	-1.8	-0.834	-5.31	-0.565	-2.1	-3.85	-0.303	-2.38	-2.58	-1.56	-0.645	-0.83	-1.28	-2.06	-1.34	-0.601	-1.36	-0.849	-2.86
-1.63	-1.81	-3.53	-3.78	-4.05	-4.84	-2.19	-2.85	-0.931	-5.79	-0.782	-1.29	-3.19	0.619	-2.84	-2.35	-2.16	-0.533	-1.16	-0.545	-1.68	-1.3	-1.12	-1.05	-0.87	-3.13
-1.56	-0.708	-3.55	-4.07	-4.24	-5.02	-2.7	-1.47	-1.16	-5.8	-0.737	-1.42	-3.91	-1.24	-2.93	-1.75	-2.23	-0.463	-0.782	-0.577	-2	-1.23	-0.664	-0.789	-1.09	-3.01
-1.43	-1.18	-3.44	-3.96	-4.06	-5.23	-1.63	-1.55	-1.42	-5.4	-0.921	-2.02	-3.75	-0.975	-3.02	-1.58	-2.12	-0.543	-1.1	-0.293	-1.66	-0.677	-0.523	-1.31	-1.2	-2.69
-1.23	-0.747	-3.67	-3.78	-4.06	-5.66	-1.99	-2.88	-1.25	-5.59	-2.05	-0.578	-4.57	-0.207	-2.97	-2.09	-1.87	-0.612	-0.949	-0.404	-1.84	-0.736	-0.945	-1.18	-1.34	-2.8
-1.93	-0.583	-3.04	-3.48	-3.94	-5.09	-1.09	-3.07	-1.73	-4.56	-1.27	-0.685	-4.52	-1.76	-2.28	-2.04	-1.96	-0.512	-0.622	-0.477	-1.79	-0.651	-0.391	-1.41	-1.06	-2.56
-1.78	-0.823	-3.23	-3.56	-3.33	-5.79	-1.49	-3.28	-0.82	-5.85	-1.13	-1.68	-4.64	-2.25	-2.04	-1.87	-1.86	-0.185	-0.173	-0.814	-1.95	-0.575	-1.12	-1.39	-1.48	-2.47
-0.864	-1.37	-3.23	-3.92	-3.44	-4.94	-2.07	-2.71	-0.785	-5.52	-1.97	-1.55	-5.19	-1.97	-2.24	-2.25	-2.52	-0.587	-0.498	-0.0197	-0.718	-0.17	-0.946	-1.51	-1.87	-2.74
-0.351	-0.533	-3.52	-3.1	-4.34	-4.24	-1.94	-2.27	-1.08	-6.42	-2.91	-0.818	-4.48	-2.32	-2.51	-2.63	-2.12	-1.1	-0.292	0.227	-0.797	-0.426	-0.918	-1.35	-1.29	-2.83
-1.05	-1.37	-3.67	-3.67	-4.3	-3.75	-1.82	-2.49	-1.31	-5.47	-3.18	-0.607	-4.61	-1.23	-2.67	-2.3	-3.42	-0.858	-1.27	-0.353	-1.2	-0.561	-0.989	-1.41	-1.82	-2.33
-1.08	-1.41	-3.39	-3.9	-3.93	-4.66	-2.47	-2.25	-2.02	-5.11	-1.61	-0.677	-4.8	-0.828	-2.66	-2.25	-2.92	-0.797	-1.5	0.0418	-1.21	-0.535	-1.07	-1.57	-1.7	-2.62
-0.83	-1.54	-3.23	-3.54	-3.9	-4.03	-2.97	-3.62	-2.06	-5.95	-1.25	0.0864	-4.72	-0.351	-2.73	-2.66	-3.09	-1.59	-1.75	-0.607	-1.93	-0.361	-1.34	-1.76	-1.78	-2.3
-1.05	-1.98	-3.69	-3.33	-3.87	-3.81	-2.68	-3.08	-1.91	-5.41	-0.598	-1.72	-5.02	-0.674	-2.46	-2.92	-2.91	-1.46	-1.06	-0.00787	-0.565	-0.494	-0.849	-1.73	-1.86	-2.3
-1.58	-1.95	-3.91	-3.7	-4.19	-3.99	-2.27	-3.5	-1.96	-5.97	-0.0801	-1.88	-4.76	-1.67	-2.14	-3.17	-2.29	-1.73	-1.3	0.242	-2.16	-0.323	-0.976	-1.46	-2.22	-2.46
-1.61	-1.04	-3.73	-3.42	-4.46	-4.83	-2.66	-3.84	-2.06	-4.78	-0.477	-0.786	-4.73	-2.47	-1.64	-3	-3.49	-1.76	-0.608	0.504	-2.66	-0.662	-1.09	-1.36	-1.93	-2.19
-1.18	-1.53	-3.79	-2.99	-4.92	-4.55	-2.56	-2.75	-1.16	-5.5	-0.826	-0.422	-4.66	-2.29	-1.89	-2.82	-3.04	-1.62	-1.22	0.215	-3.18	-0.554	-0.976	-1.42	-1.98	-2.59
-1.12	-0.972	-3.92	-1.96	-4.93	-4.17	-2.28	-3	-1.41	-5.53	-0.242	-1.41	-4.49	-2.28	-1.78	-2.97	-3.14	-1.37	-1.23	0.462	-2.61	-0.519	-1.12	-1.15	-2.01	-2.4
-1.3	-1.2	-3.96	-2.27	-4.53	-3.74	-2.51	-3.1	-1.65	-4.53	-0.812	-0.358	-4.79	-2.9	-1.97	-2.43	-3.16	-1.22	-0.596	-0.46	-3.45	-0.374	-1.12	-1.27	-1.89	-2.45
-1.09	-0.956	-3.61	-3.09	-4.51	-3.92	-1.9	-3.22	-2	-4.89	-2.28	-0.515	-4.51	-1.69	-2.47	-2.59	-3.34	-1.01	-1.29	-0.747	-2.1	-0.24	-1.42	-1.25	-2.12	-2.98
-1.2	-1.52	-2.9	-2.89	-4.36	-3.97	-1.71	-3	-1.78	-5.32	-0.275	-1.73	-5.37	-3.23	-2.67	-2.67	-1.39	-0.168	-0.954	-0.603	-2.8	-0.577	-1.35	-1.52	-2.06	-2.65
-1	-2.35	-2.92	-3.35	-4.24	-4.45	-2.33	-0.976	-1.13	-4.37	-0.995	-0.685	-5.13	-2.64	-2.77	-2.03	-2.39	0.584	-1.11	-0.812	-2.03	-0.597	-1.34	-1.64	-1.93	-2.65
-1.45	-2.03	-3	-2.46	-4.07	-4.1	-1.89	-2.25	-1.82	-5.36	-0.385	-0.205	-5.58	-1.89	-2.78	-1.58	-2.54	-0.373	-0.645	-0.299	-2.62	-0.787	-1.4	-1.9	-2.23	-2.35
-1.6	-1.55	-2.82	-1.82	-4.38	-4.06	-3.24	-2.31	-1.72	-4.72	-1.74	-2.82	-5.28	-2.49	-1.9	-1.62	-2.2	-0.468	-2.14	-0.18	-2.66	-0.867	-1.62	-1.82	-1.88	-1.99
-0.964	-1.79	-3.12	-1.25	-3.88	-4.41	-1.73	-1.86	-1.96	-5.05	-2.94	-0.692	-5.11	-2.53	-2.38	-2.05	-2.57	-0.598	-2.89	-0.15	-1.27	-1.09	-1.52	-1.64	-1.82	-2.83
-0.985	-1.41	-3.03	-2.66	-3.59	-4.14	-2.18	-1.57	-2.13	-5.83	-0.0948	-0.821	-4.48	-2.68	-2.07	-2.55	-2.59	-0.609	-2.27	0.464	-2.19	-0.973	-1.41	-1.67	-1.64	-2.18
-1.46	-1.12	-3.03	-2.84	-3.8	-4.69	-2.04	-1.88	-1.92	-4.8	-0.374	0.0854	-4.62	-2.71	-2.52	-1.99	-0.943	-1.21	-1.51	0.0922	-1.94	-0.914	-1.25	-1.81	-1.85	-2.41
-1.3	-1.83	-3.14	-3.16	-3.71	-3.87	-1.99	-2.25	-0.694	-4.35	-1.21	-1.4	-5.05	-2.44	-2.46	-1.49	-2.12	-0.78	-1.19	0.557	-2.26	-0.899	-1.53	-2	-2.11	-2.16
-1.53	-1.23	-3.17	-3.27	-3.9	-4.36	-2.35	-2.42	-1.25	-4.89	-0.967	-0.411	-4.92	-1.3	-2.41	-1.37	-3.05	-0.0286	-1.26	0.533	-2.48	-0.76	-1.33	-1.97	-2.21	-2.03
-1.52	-1.24	-3.13	-2.59	-4.38	-3.61	-2.38	-2.75	-1.4	-6.4	-1.22	-0.809	-4.48	-2.46	-2.44	-1.43	-2.48	-0.304	-1.65	-0.197	-3.23	-0.572	-1.05	-1.94	-2.15	-2.83
-1.14	-0.848	-3.08	-2.47	-4.15	-3.9	-3.16	-3.19	-1.66	-5.53	-1.48	-0.473	-4.23	-2.57	-2.24	-1.34	-1.99	-0.84	-1.7	0.148	-2.51	-0.2	-0.377	-2.07	-2.18	-1.89
-1.17	-2.14	-3.19	-2.36	-4.05	-3.67	-2.62	-2.81	-1.33	-4.76	0.0989	-2.27	-4.75	-2.52	-2.28	-1.93	-2.37	-0.987	-1.52	-0.14	-1.25	-0.435	-0.358	-2.19	-2.36	-2.17
-0.879	-2.33	-3.06	-2.39	-4.04	-4.22	-2.5	-2.4	-1.39	-4.63	-1.49	-1.65	-4.94	-2.19	-2.2	-1.9	-2.51	-0.632	-2.08	0.4	-1.46	-0.409	-0.846	-2.32	-1.61	-2.48
-1.23	-2.26	-3.14	-2.57	-4.65	-4.05	-1.71	-2.01	-1.62	-4.47	0.0119	-0.912	-4.5	-2.15	-2.18	-2.08	-2.57	-0.265	-1.91	0.471	-1.19	-0.556	-0.828	-2.1	-1.19	-3.11
-1.49	-1.99	-3.04	-2.17	-4.53	-4.21	-1.47	-3.58	-1.58	-4.64	-1.08	-0.661	-5.18	-3.31	-2.74	-1.72	-2.13	-0.626	-2.08	0.331	-2.65	-0.557	-0.725	-1.81	-1.44	-2.87
-1.86	-1.76	-3.01	-2.78	-4.05	-4.07	-2.12	-2.01	-1.5	-5.11	-1.05	-2.6	-5.08	-2.21	-2.32	-1.91	-2.54	-0.539	-1.83	0.868	-2.53	-0.629	-0.832	-1.99	-1.46	-2.53
