# Supplementary material for: Metabolic sensing in AgRP neurons integrates homeostatic state with dopamine signalling in the striatum
Source: eLife journal article supplement (doi:10.7554/elife.72668), 2022-01-12
Supplement: fig1-data1 [file Fig1K.xlsx]

## Sheet: Sheet1
	Agrp GCamp														Agrp Crat
-60 to -10	-0.000268	0.00118138	-0.0019232	-0.0013354	-0.0003399	9.5874e-05	0.00032857	0.00265631	-0.0042072	0.00086462	-0.0026174	0.00208622	0.00062994	0.0002947	-0.0047648	0.00079729	0.00245566	-0.001795	0.00199123	0.00150886	0.00148108	-6.216e-05	-0.0014161	-0.003356	-0.0003185	0.00108975
-10 to 0	0.270181	-0.183699	-2.01863	-2.36352	-1.93466	-0.730199	-0.957315	0.0546587	-2.25055	1.52589	-0.434827	-0.227381	-0.819824	-2.1332	-1.87885	-1.82294	-0.366344	-0.893137	-0.664003	-0.0274563	-1.14564	-0.655195	0.47052	-0.970059	-1.2184	-0.998447
0 to10	-1.38444	-1.13162	-3.65631	-3.1533	-5.26184	-5.21942	-4.93786	-2.97645	-2.88028	-3.42355	-1.21043	-0.739807	-3.91087	-6.56699	-2.51631	-2.58854	-1.39306	-1.12009	-1.94817	2.17105	-2.08515	-1.30327	-1.04834	-1.60901	-2.48204	-1.1153
10 to 30	-2.77366	-1.49769	-4.29234	-3.4299	-5.94668	-6.89263	-4.70566	-4.19	-2.69937	-6.73054	-1.87606	-1.91874	-5.13459	-8.52083	-2.89424	-2.80171	-1.49198	-1.02953	-2.21076	0.326882	-2.24065	-1.80561	-1.19014	-2.56298	-3.40854	-1.97388
10 to 60	-2.64124	-1.27222	-4.0358	-3.04925	-4.86016	-5.92682	-3.70986	-3.51361	-2.13972	-6.61557	-1.8242	-1.78427	-4.72375	-7.18221	-2.761	-2.57769	-1.40284	-0.951494	-1.87063	0.0628374	-2.4026	-1.39925	-0.510776	-1.69957	-2.89509	-1.8867
