# Supplementary material for: Metabolic sensing in AgRP neurons integrates homeostatic state with dopamine signalling in the striatum
Source: eLife journal article supplement (doi:10.7554/elife.72668), 2022-01-12
Supplement: fig1-data1 [file Fig1L.xlsx]

## Sheet: Sheet1
	Agrp GCamp														Agrp Crat
first	-0.848021	-0.0062498	0.320692	-2.9645	0.389829	-3.38899	-0.442786								-2.22003	-0.281856	-1.33939	-2.34375	-0.87374
repeated	-2.64124	-1.27222	-4.0358	-3.04925	-4.86016	-5.92682	-3.70986	-3.51361	-2.13972	-6.61557	-1.8242	-1.78427	-4.72375	-7.18221	-2.761	-2.57769	-1.40284	-0.951494	-1.87063	0.0628374	-2.4026	-1.39925	-0.510776	-1.69957	-2.89509	-1.8867
