# Supplementary material for: Metabolic sensing in AgRP neurons integrates homeostatic state with dopamine signalling in the striatum
Source: eLife journal article supplement (doi:10.7554/elife.72668), 2022-01-12
Supplement: fig1-data1 [file Fig1M.xlsx]

## Sheet: Sheet1
Agrp GCamp														Agrp Crat
0.969	0.48	-1.3	0.708	-0.465	-1.92	0.5	-0.633							0.922	0.909	0.0962	0.886	3.06	0.321	-0.944
0.883	0.653	-1.31	0.524	0.644	-0.18	1.22	-0.586							0.696	-0.0415	0.0105	0.738	2.7	-0.0314	-0.251
1.01	0.937	-1.14	0.57	0.717	-0.308	0.157	-0.11							1.15	0.996	-0.0152	0.288	2.2	-0.793	-0.751
1.33	0.91	-1.28	0.971	-0.316	-0.175	0.824	0.439							0.274	0.912	0.588	0.533	1.1	1.03	-0.586
1.71	0.18	-1.9	0.777	-0.123	0.285	1.06	1.05							-0.126	2.27	0.491	1.48	0.211	0.481	-0.528
1.62	-0.166	-1.6	1.5	-1.14	0.0886	1.45	1.23							-0.271	0.224	0.476	1.05	0.421	-0.873	0.902
1.5	-0.281	-0.0776	0.478	-0.827	-0.616	2.27	1.01							0.112	0.461	0.492	0.928	0.313	-0.462	1.81
1.25	-0.0521	0.677	0.489	-0.728	-0.192	2.15	0.772							-0.543	1.83	0.566	0.583	1.07	-0.678	0.509
1.52	-0.856	0.395	0.851	-0.21	-1.16	2.2	0.672							-0.166	1.75	-0.101	0.618	1.94	0.61	0.783
1.41	-0.105	-0.505	-0.661	-0.427	-0.91	1.7	0.727							0.0671	-0.278	0.00417	0.0604	2.08	0.459	-0.391
1.83	0.312	0.196	-0.443	-0.19	-1.11	1.36	0.486							0.814	0.837	0.037	0.529	1.58	1.16	0.186
2.13	0.0837	0.206	0.016	-0.869	-1.32	0.839	0.644							0.198	1.51	-0.263	0.797	1.36	1.62	-0.42
2.29	-1.18	-0.885	0.259	-0.2	-1.19	0.483	0.393							0.344	-0.536	0.0642	0.796	0.833	0.677	-0.132
1.67	-1.01	-0.767	-0.333	-0.991	-0.962	-0.153	0.621							0.25	1.04	-0.227	0.355	-0.263	-0.347	-0.72
1.97	-0.137	0.192	0.359	-0.883	-0.977	0.539	-0.0978							-0.0552	0.399	-0.267	0.374	0.34	0.115	0.44
1.8	0.254	0.269	-0.0309	-0.904	-1.12	0.297	0.116							-1.1	1.2	-0.0283	0.322	0.477	0.684	0.405
1.97	0.223	-0.139	-0.0878	-0.834	-1.62	0.856	0.322							-0.563	1.83	0.036	0.54	0.126	-1.23	0.262
1.25	0.0829	-0.855	0.427	-1.51	0.26	0.804	0.702							-0.771	1.79	-0.362	0.324	0.393	0.104	-0.913
1.66	-0.811	-0.61	0.154	-1.36	-0.00554	1.38	0.935							-0.518	0.589	-0.826	0.347	0.218	-0.0325	0.797
1.47	-0.286	-0.555	0.148	-1.26	-1.28	1.44	1.81							-1.03	2.16	-0.446	0.58	-0.0122	0.62	0.844
1.52	1.39	-1.17	0.488	-0.522	-0.452	1.24	1.68							-0.953	1.46	-0.412	0.635	0.33	0.747	0.646
1.05	0.556	-1.32	1.17	-0.0818	-2.69	2.06	1.94							-0.245	-0.14	-0.189	1.4	1.12	0.842	-0.713
1.36	0.73	-0.94	0.973	0.54	-2.87	1.71	1.39							-0.524	0.48	-0.725	2.04	1.12	-0.731	-0.00342
1.29	-0.299	-1.29	0.71	0.308	-1.42	2.22	1.25							-0.0364	1.13	-1.12	1.88	2.31	-1.34	-0.495
1.54	-0.262	-0.0242	0.94	-0.427	-1.75	0.927	1.29							-0.284	1.2	-1.12	0.991	2.22	-0.273	-0.583
0.796	-0.325	-0.349	0.378	0.101	-1.34	0.891	1.13							-0.382	1.09	-0.761	0.469	1.27	-0.879	0.0265
1.22	1.04	-0.612	-0.0847	-0.49	-1.47	1.35	0.498							-1.57	-0.857	-0.556	0.883	2.17	1.67	0.776
1.37	1.01	-0.642	-0.863	0.593	-1.58	1.81	0.531							-1.37	1.16	-1.1	0.733	1.72	1.24	0.27
1.06	1.15	-0.729	-0.889	-0.103	-1.34	1.65	0.161							-1.35	0.673	-0.582	0.816	1.14	0.963	0.554
1	-0.136	-1.26	-0.176	0.133	-0.146	2.09	-0.787							-1.5	1.06	-0.507	0.643	1.29	0.653	0.0164
0.987	0.172	-0.824	-0.427	1.36	-0.208	2.32	-0.398							-0.438	0.293	-1.03	0.823	1.19	0.648	1.59
1.16	0.46	-0.274	-0.28	0.79	0.333	3.17	-0.676							-0.0205	2.79	-1.2	0.385	0.943	2.5	2.1
0.855	1.31	-0.361	-0.0928	0.0275	0.341	2.61	-0.291							-1.05	2.58	-0.947	0.486	0.795	0.206	1.59
0.719	1.04	-0.26	-0.657	-0.146	-1.3	1.42	-0.251							-1.3	2.66	-0.664	0.693	0.537	0.67	2.01
0.911	0.91	-1.07	-0.102	0.685	0.199	1.59	-0.365							-0.0773	0.999	-0.429	0.688	-0.634	0.877	1.53
1.41	1.97	-0.251	-1.53	0.599	-0.0106	2.48	-0.54							-1.07	1.39	-0.725	0.774	0.299	1.04	0.269
1.19	1.03	-0.567	-1.24	0.197	0.837	0.56	-0.581							0.0025	1.88	-0.434	0.746	0.557	-1.32	0.793
1.01	1.46	-0.577	-0.722	-0.295	-0.223	1.25	0.333							-0.424	0.661	-0.482	0.632	-0.404	-0.109	0.696
0.967	1.36	-0.0623	-1.02	-0.0275	0.103	1.05	0.539							0.609	0.0996	-0.378	0.431	1.01	0.544	1.14
0.589	0.803	-0.478	-0.66	-0.462	0.307	1.41	0.19							0.267	1.44	-1.2	-0.334	1.66	0.81	1.39
0.655	1.77	-1.06	-0.83	-0.615	-1.03	1.15	0.346							0.0207	0.761	-1.31	0.34	1.41	1.28	0.334
0.148	1.63	-1.4	-0.376	-0.596	-1.59	1.52	1.45							-0.133	0.721	-1.31	0.662	1.4	-0.218	0.054
-0.133	2.38	-1.01	-1.12	-0.347	-1.81	0.696	1.41							0.69	0.632	-1.63	0.215	0.802	0.133	0.497
-0.262	0.911	-1.6	-0.838	-0.69	-1.57	1.75	1.61							-0.0532	0.223	-1.71	0.885	0.858	-0.893	0.618
-0.428	0.132	-0.903	-0.842	-0.415	-1.83	1.61	1.58							0.394	1.04	-2	0.139	0.772	0.399	0.98
-0.124	1.02	-0.543	-1.09	-1.45	-2.16	2.11	1.74							1.22	0.389	-2.42	0.543	0.946	1.2	0.786
-0.0875	0.167	-0.995	-0.609	-1.26	0.192	1.25	1.27							1.88	1.81	-1.48	0.849	0.357	0.348	0.627
0.737	1.41	-0.494	-1.11	-0.696	0.043	1.71	1.17							1.78	1.66	-0.926	0.818	0.751	1.38	0.533
0.833	1.05	-0.454	-1.23	-0.566	1.22	1.27	1.46							1.41	1.92	-0.722	0.549	-0.0973	1.02	0.701
0.895	2.31	-0.948	-0.922	-1.26	1.19	1.43	0.968							0.639	0.563	-0.88	-0.539	-0.107	2.64	1.55
1.33	2.02	-0.227	-1.92	-0.442	0.967	-0.136	1.22							1.04	0.678	-0.455	0.405	-0.0364	-0.866	1.61
2.3	1.84	-0.876	-2.01	-1.15	0.183	0.296	0.336							0.49	1.12	-0.6	0.322	0.638	-0.858	1.65
2.5	2.42	-1.26	-0.888	-0.487	2.01	-0.584	0.198							0.276	1.24	-0.834	0.174	0.455	1.04	0.658
3.06	1.25	-1.05	-1.29	-1.03	0.55	0.54	0.539							0.328	1.85	-0.959	-0.141	0.198	0.596	0.644
3.29	1.55	-0.56	-0.559	-1.5	0.872	0.176	0.45							0.416	1.15	-0.807	0.754	-0.757	-0.713	0.212
3.08	2.31	-0.759	-1.11	-0.478	-0.761	-0.156	0.851							-0.0378	0.743	-0.879	-0.221	-0.568	-0.141	1.04
2.61	1.47	-0.255	-1.04	-1.01	-0.174	0.895	1.02							-0.389	-0.0731	-1.1	-0.258	-0.918	1.25	0.33
2.26	2.78	-1.21	-0.785	-0.722	-0.869	1.8	1.21							-0.73	0.16	-1.24	0.148	-0.915	1.06	0.0954
2.2	2.38	-0.2	-1.06	-0.546	-0.451	2.05	0.804							-0.145	0.4	-1.07	-0.618	0.337	-0.0451	0.0807
2.23	1.73	-0.75	-1.28	-1.01	0.109	0.573	0.273							0.226	-1.34	-1.58	0.0502	-0.038	1.15	-0.48
2.35	2.03	-0.624	-0.605	-0.91	-0.556	0.25	0.133							0.118	0.154	-1.51	-0.482	-0.404	0.723	-0.28
2.36	1.56	0.116	-0.117	-0.809	-0.0541	0.986	0.292							-0.494	0.0461	-1.42	-0.364	-0.863	0.143	0.448
1.96	1.1	-0.857	-0.749	-0.103	0.985	1.11	-0.264							-0.358	1.49	-1.3	-0.864	-0.789	-0.0146	0.0401
2.23	0.318	-0.295	-2	0.0564	0.861	1.23	0.2							0.182	0.369	-1.05	0.305	0.206	0.485	0.123
1.99	0.825	-0.665	-1.9	0.274	-0.918	1.67	0.193							0.348	-0.462	-1.14	-0.153	0.371	0.53	0.612
1.74	-0.3	-1.45	-1.15	0.554	1.49	1.11	0.586							1.6	-0.098	-0.815	-0.739	0.0141	1.63	-0.341
1.59	-0.195	-0.589	-1.25	-0.277	0.0752	0.137	0.0718							2.47	-0.79	-1.09	-0.734	0.0331	1.57	1.92
1.8	0.131	-0.416	-1.45	1.23	-0.249	0.624	-0.0466							2.12	-0.674	-1.16	-0.606	-0.543	0.993	1.54
1.59	-0.0942	-0.711	-1.01	0.13	1.5	-0.532	-0.104							0.982	0.164	-0.983	-0.312	-0.581	0.278	1.12
1.32	0.381	-1.33	-1.69	0.829	1.52	0.13	0.404							0.852	-0.757	-0.97	-0.619	-0.665	0.425	0.775
1.37	-0.0232	-0.751	-0.859	0.463	0.898	-0.707	0.534							1.57	-0.839	-0.908	-0.352	-0.697	0.577	2.27
1.41	-1.12	-1.05	-1.03	-0.0943	1.45	-0.102	0.559							0.799	-0.738	-0.956	-0.0443	-0.725	0.516	2.22
0.93	-0.177	-0.718	-0.385	1.23	1.45	1.85	0.365							0.966	-1.1	-1.09	-0.561	-1.27	0.0433	1.71
0.472	0.497	-0.782	-0.553	1.73	1.71	-1.45	0.0541							0.519	-1.49	-1.13	0.0111	-0.512	-0.547	1.62
-0.332	-0.254	-0.746	-0.931	1.39	0.978	-0.965	-0.0699							0.417	-0.857	-0.559	-0.814	-0.461	-1.29	0.859
-0.939	0.0519	-0.143	-0.557	1.57	0.268	-0.74	-0.0168							0.115	-0.225	-1.14	-0.537	-1.01	-0.963	1.47
-0.491	0.349	-1.69	-0.527	1.7	1.46	-1.02	-0.428							0.319	-1.89	-0.75	-0.541	-0.552	-0.742	1.29
0.284	-0.0862	-2.14	-0.914	0.522	0.616	-2.37	0.155							0.0935	-0.221	-0.611	-0.287	-0.799	0.0111	1.45
0.71	-0.786	-1.73	0.419	0.883	1.34	-1.47	-0.113							0.662	-1.16	-0.049	-0.385	-1.57	1.02	0.254
1.09	-0.0736	-2.12	0.657	1.75	1.73	-0.833	-0.771							-0.0223	-0.894	0.643	0.177	-1.04	0.939	0.0167
0.954	0.0493	-1.75	0.396	0.766	0.833	-0.672	0.17							-0.058	0.0018	0.568	-0.351	-0.631	0.826	0.953
1.09	0.121	-2.06	-0.204	0.685	1.7	-0.967	0.0901							0.17	0.504	0.319	-0.416	-1.56	-0.756	-0.16
1.29	-0.054	-1.98	-0.605	0.961	0.132	0.0655	-0.323							0.0144	-0.609	0.619	-0.615	-0.401	-0.0868	0.746
0.827	0.564	-2.1	0.0656	0.83	0.825	0.119	-0.205							1.34	-0.0134	0.661	-0.146	0.947	0.234	1.04
0.397	-0.786	-1.95	0.205	0.738	0.139	0.107	-0.232							0.915	-0.965	0.779	-0.715	0.167	-0.601	1.67
0.674	-0.382	-2.06	0.462	1.58	0.557	-0.00621	0.0673							1.73	-0.297	0.931	-0.985	-0.122	-0.499	1.24
1.26	-0.832	-1.64	-0.0952	2.46	0.757	-0.613	-0.622							0.42	1.02	0.498	-0.952	1.37	0.811	0.305
1.4	-0.00472	-0.795	-0.861	1.94	-0.218	-0.214	-0.401							0.109	-0.922	0.49	-0.736	1.59	2.09	1.15
1.6	-0.168	-1.43	-0.391	2.06	-0.229	-0.559	-0.5							-1.47	1.22	0.636	-0.732	1.44	2.26	0.417
1.54	0.365	-0.15	-0.367	1.45	-0.387	-1.75	-0.596							-0.0428	-0.803	0.285	-0.782	1.77	-0.116	0.863
1.62	-0.053	-1.06	-0.101	0.476	0.172	-1.28	-0.252							-0.673	-0.1	0.632	-0.848	1.36	0.932	0.656
1.29	0.304	-1.07	0.0843	0.348	0.304	-0.568	-0.601							0.188	-1.37	0.649	-0.671	1.4	-0.257	0.116
0.954	-0.182	-1.91	-0.45	0.667	-0.669	-1.09	-0.944							0.746	-1.22	0.433	-0.277	1.5	-0.198	0.269
0.307	-0.211	-1.62	-0.525	0.557	0.737	-1.22	-1.22							1.18	-0.711	0.425	-0.822	0.385	-0.25	-0.0672
0.343	0.0572	-2.13	0.0454	0.355	1.75	-1.55	-1.41							0.681	-0.329	0.412	0.46	-0.332	0.595	0.0129
1.14	-0.685	-1.68	-0.35	0.461	0.954	-1.01	-0.751							-0.228	0.257	0.232	-1.03	0.798	0.365	-0.0901
0.0247	-0.738	-1.69	-1.38	0.184	0.0125	-0.83	-0.503							0.132	-0.922	0.828	-0.323	0.0661	-0.287	-0.442
-0.19	-0.64	-0.961	-0.597	-0.122	0.27	-1.46	-1.09							0.0796	-0.562	0.352	-0.244	0.125	-0.876	0.0527
0.317	-0.902	-1.78	-0.649	-0.337	0.181	0.424	-0.879							0.263	-0.534	0.0113	0.159	0.284	-0.39	-1.04
0.211	-0.233	-1.54	-0.468	-0.399	-0.488	0.362	-0.863							-0.382	-0.352	-0.314	-0.617	-0.148	-1.07	0.456
0.133	-0.661	-0.849	-0.346	-1.36	0.19	0.384	-1.33							-0.569	-0.481	0.312	-0.435	-0.288	-0.712	-1.44
0.0025	0.414	-0.857	-1.64	-1.38	-0.303	-0.695	-1.42							-0.384	0.659	-0.0825	-0.162	0.125	-1.53	0.112
-0.472	-0.126	-0.871	-2.05	-0.416	-2.21	-0.325	-0.718							0.0247	0.0707	0.0792	0.0956	-0.105	0.109	0.422
-0.963	0.363	-1.28	-1.54	0.221	-1.07	-0.00603	-1.3							0.906	0.128	0.108	-0.529	-0.672	-0.0608	0.155
-1	-0.777	-0.752	-1.08	0.465	-0.869	-0.567	-0.711							2.75	0.0334	0.928	-0.784	-0.19	0.147	0.123
-1.4	-1.1	-1.4	-0.285	0.659	-0.0721	0.139	-0.0688							1.91	0.76	0.67	-1.56	-0.209	-0.363	-0.902
-0.413	-0.621	-1.29	-0.941	-0.0474	-0.74	-0.975	-0.38							1.95	-0.35	0.499	-0.749	-0.806	0.0394	-0.584
-0.674	-1.95	-1.11	-0.81	0.311	0.44	-0.746	-0.441							2.04	-0.623	0.196	-0.579	0.278	0.845	0.111
-0.632	-0.866	-1.65	-1.18	-0.0108	0.729	-1.5	0.537							1.91	-1.71	0.347	-0.429	0.531	1.1	0.432
0.183	-0.807	-0.391	-0.756	-0.701	1.16	-1.72	0.834							2.26	-0.517	0.146	-0.579	1.35	1.34	0.721
-0.393	-1.25	-0.189	-1.15	-0.0788	1.42	-1.22	0.395							2	-0.107	0.51	-0.606	0.945	1.63	-0.795
-0.465	-1.11	-0.471	-1.42	0.259	1.36	-0.944	-0.0935							0.802	-0.302	-0.414	-0.635	0.652	0.578	-0.272
0.105	0.376	-0.169	-1.37	0.342	0.841	-1.74	-0.338							0.646	-0.0387	-0.224	-0.983	-0.094	-1.1	-0.722
0.252	-0.996	-0.089	-1.09	0.627	1.16	0.107	0.157							1.27	-0.909	0.313	-0.455	0.289	-0.106	-0.81
0.393	-0.666	0.204	-0.89	0.13	0.717	-0.265	-0.114							1.51	-0.817	0.222	-0.0959	1.88	1.26	0.495
-0.278	-1.03	-0.784	-1.34	-0.49	2.6	-0.0827	-0.993							1.38	-0.154	0.16	-0.143	0.879	1.5	-1.05
0.288	-0.951	-0.569	-0.66	0.148	1.14	-0.105	-1.14							1.39	-1.79	0.6	-0.107	2.18	1.9	-0.47
0.0872	-0.292	-0.774	-0.79	-0.107	1.41	0.395	-0.624							0.881	-0.655	1.27	-0.61	2.43	0.513	-0.649
0.804	-0.856	-1.49	-0.657	-0.194	1.48	-0.549	-0.541							-0.0174	-1.49	2.76	-1.02	1.8	0.732	-0.252
1.32	0.134	-1.69	-0.668	0.542	1.81	0.556	-0.827							0.846	0.0855	3.43	-0.842	1.41	-0.865	-0.709
0.91	-0.0373	-1.36	-0.918	0.335	2.12	-0.326	-1.02							1.09	-1.25	2.89	-0.354	1.25	0.317	0.487
1.15	-1.08	0.0207	-1.31	-0.538	0.605	-0.82	-0.212							0.72	-0.54	2.52	-0.139	1.77	-0.688	-0.289
0.121	-0.686	-0.429	-0.791	0.0634	0.717	0.329	-0.573							0.923	-0.979	2.06	-0.552	1.59	-0.242	-1.47
0.286	0.391	-0.48	-1.6	-0.529	0.572	-0.493	-1.21							0.587	-0.302	2.36	-0.853	1.34	-0.269	-1.04
-0.387	1.09	-0.527	-1.54	-1.05	0.174	-0.0684	-1.75							0.329	-0.435	2.06	-0.0442	1.8	0.0677	-0.654
-0.763	1.5	-0.0295	-0.682	-1.55	0.122	-0.00547	-1.35							1.01	-1.05	2	-0.719	0.446	-1	-0.873
-0.488	0.57	-0.709	-1.12	-1.44	-0.454	0.159	-0.724							1.15	-0.697	1.75	-0.36	0.758	-1.58	-0.411
0.337	0.638	-0.21	-1.24	-0.983	-0.726	0.229	-0.881							1.09	-1.49	1.49	-0.343	1.12	-0.523	-0.233
0.254	1.8	0.372	-1.09	-0.906	-0.218	-0.667	-1.17							0.402	-1	0.902	-0.701	0.749	0.751	-0.651
-0.253	0.972	0.0378	-0.97	-0.585	0.903	0.267	-0.887							0.943	-0.482	1.52	-0.658	0.24	0.738	0.16
-0.282	0.268	-0.495	-1.61	-0.996	-0.00705	-0.621	-1.32							1.63	-0.752	1.43	-0.627	0.096	0.114	0.0102
-0.373	1.03	-1.56	-0.706	-0.0161	-0.362	-0.635	-1.16							2.45	-1.22	1.28	-0.346	0.176	1.17	-0.526
0.0817	-0.708	-1.77	-1.61	-0.38	0.19	0.458	-0.526							3.85	-0.568	0.945	-0.505	-0.184	1.75	-0.868
0.687	0.0978	-0.713	-1	-0.528	0.635	0.257	-0.0582							3.91	-1.48	0.811	-1.34	0.227	1.95	-1.17
0.46	-0.779	-1.14	-0.53	0.301	-0.503	-0.0196	-0.643							2.27	-0.0382	0.429	-1.36	-0.145	0.688	-0.07
0.0996	-0.12	-0.735	0.378	0.774	0.379	0.0507	-0.552							2.32	-0.0968	0.601	-1.11	0.113	0.925	-0.148
-0.464	0.24	-0.479	0.271	1.22	-0.743	1.05	-0.235							1.91	0.19	-0.167	-0.89	-0.269	-0.798	-0.236
0.109	0.225	-0.432	0.632	1.42	-0.353	0.93	-0.378							1.36	0.312	-0.659	-0.486	-0.247	0.0431	-0.923
0.278	-0.288	-1.27	-0.0698	0.382	0.484	0.704	0.488							0.638	-0.518	-0.899	-0.232	0.189	0.186	0.336
0.683	-0.333	-1.27	0.624	0.926	-0.413	0.516	-0.1							1.23	0.594	-0.401	-0.688	-0.0367	-1.8	0.422
0.38	-0.94	-1.98	-0.214	0.681	-0.9	1.39	0.196							1.05	-0.053	-0.241	-1.03	-0.306	0.0619	-0.542
0.207	-0.206	-1.24	0.623	0.741	-1.14	0.701	-0.421							0.518	1.45	0.367	-0.905	-0.912	0.935	-0.344
0.081	-0.744	-1.12	0.309	0.422	-0.917	-0.576	-0.424							0.769	0.957	0.0235	-1.69	0.428	1.21	-0.578
-0.104	0.692	-1.74	0.718	0.27	0.162	1.2	-0.848							0.877	0.563	0.56	-1.35	0.176	0.339	0.82
-0.752	-0.171	-2.11	1.02	0.787	0.298	0.464	-0.682							0.226	0.406	-0.0216	-0.738	0.0279	0.189	-0.321
-0.837	1.03	-1.98	0.145	0.343	0.586	0.0319	-1.26							0.847	1.11	-0.383	-0.745	-0.132	-0.262	-0.136
-0.812	0.446	-1.99	0.0363	0.748	-1.15	-0.0885	-1.12							0.261	0.95	-0.0264	-0.795	0.357	0.289	-0.0359
-0.486	0.755	-1.77	0.0196	0.2	-0.643	0.624	-0.509							1.32	-0.348	0.29	-0.927	-0.195	1.73	0.423
-0.931	1.07	-1.93	0.523	-0.0125	-1.68	0.209	-0.165							0.896	-0.0594	0.0695	-0.466	-0.767	-0.122	0.236
-0.522	0.712	-1.71	-0.0779	0.323	-0.758	-0.0347	-0.0848							0.695	-1.49	0.551	-0.624	-0.993	0.00688	-0.561
-0.826	-0.254	-0.81	0.599	0.974	-0.312	0.353	0.483							0.625	0.669	0.65	-0.871	-0.386	0.285	-1.12
-0.386	-0.0182	-1.09	-0.22	0.394	-0.986	1.41	-0.136							0.125	-1.18	0.692	-1.41	-0.712	0.395	-0.6
0.104	-0.372	-1.13	-0.792	1.18	0.541	1.52	-0.832							-0.555	1.1	0.383	-0.264	0.463	0.344	0.0802
-0.4	1.09	-0.691	-1.19	1.05	0.654	1.06	-1.1							-0.598	0.266	0.921	-1.12	0.162	-0.0144	-1.14
0.0821	0.343	-0.73	-0.798	1.61	0.902	1.14	-0.919							-0.787	-0.225	0.383	-1.23	0.489	0.253	-1.12
0.0168	1.1	-0.515	-0.159	1.07	0.218	1.47	-0.778							0.226	-0.217	0.171	-0.827	0.501	1.96	-1.45
0.0779	2.07	-0.614	-0.0534	-0.206	-0.709	0.996	-0.703							-1.99	1.16	0.543	-1.65	0.605	0.0498	0.539
-0.348	0.846	0.163	-0.74	-0.05	-0.973	0.845	-0.0144							-1.23	-0.525	0.258	-1.02	-0.353	0.000902	0.822
-0.445	0.644	-0.696	-0.723	0.284	-2.1	1.27	0.256							-2.05	-0.701	0.191	-1.07	0.0301	0.575	0.513
-0.219	0.691	-0.403	-1.26	-0.361	-1.96	1.07	0.016							-1.69	-0.361	-0.181	-1.19	-0.0663	0.0322	-0.59
0.118	0.66	-0.323	-1.72	-0.0213	-1.39	1.62	-1.11							-1.52	-0.786	-0.398	-1.3	-0.534	-1.26	0.125
-0.0941	0.622	-1.14	-1.71	-0.209	-2.3	0.303	-1.99							-1.45	0.208	-0.265	-0.61	0.744	0.303	-0.906
0.151	1.56	-1.89	-0.978	-0.158	-1.22	1.55	-1.07							-1.43	-0.0853	0.316	-0.676	0.293	0.0987	-0.549
-0.332	0.807	-0.559	-0.917	-0.442	-0.0996	1.09	-0.905							-1.66	-0.805	0.23	-0.546	-0.388	1.08	0.301
0.00801	0.845	-0.781	-0.635	-0.0988	-0.752	0.696	-0.905							-2.28	-0.631	-0.156	0.287	0.00173	0.474	-0.362
-0.45	1.73	0.185	-1.41	0.656	-1.85	0.186	-0.86							-1.55	0.661	-0.371	0.658	-1.12	1.16	-0.565
-0.637	2.85	0.0221	-1.83	1.24	-2.09	-0.591	-1.17							-1.08	-0.687	-0.0304	0.102	-0.498	-0.128	-0.918
-1.02	1.97	0.191	-1.66	1.21	-0.948	0.0639	-1.26							-1.07	0.288	0.198	0.242	-0.385	-0.326	-0.878
-0.788	2.53	0.373	-0.9	0.776	-1.26	0.26	-0.778							-0.769	-1.04	-0.251	0.438	0.677	0.669	-0.978
-0.823	1.88	0.234	-0.681	0.762	-0.0653	0.367	-0.711							-0.83	-0.677	0.252	0.102	-0.332	-0.243	-0.0137
-0.619	2.59	0.26	-1.3	1.06	0.159	0.498	-0.864							-0.895	0.448	-0.0808	0.262	-0.538	-1.41	-0.334
7.42e-05	2.98	0.86	-1.79	0.597	1.38	0.891	-0.83							-0.456	-0.0202	-0.0516	0.259	-0.536	-0.445	0.153
-0.174	2.39	-0.285	-1.02	0.69	-1.41	0.503	-0.636							-1.44	-0.872	-0.646	0.143	0.277	0.615	-0.781
-0.912	2.21	-0.755	-0.965	-0.917	-1.12	0.869	-1.33							-0.679	-0.225	-0.688	-0.11	-0.927	1.95	-0.289
-1.88	1.84	-0.109	-1.14	0.052	-0.341	1.38	-0.964							0.206	-0.748	-0.67	0.657	-0.76	0.621	0.232
-1.48	2.04	-0.237	-1.14	-0.726	0.402	0.897	-0.457							-0.174	-0.617	-0.512	0.458	0.634	-0.0341	0.97
-1.28	1.38	0.286	-1.29	-0.629	0.165	1.49	-0.026							-0.455	-0.177	-0.623	-0.362	0.235	-0.925	-0.0446
-1.24	1.39	0.714	-0.736	-0.704	0.5	0.445	-0.115							-0.508	1.3	-0.929	0.429	0.664	-1.16	-0.0283
-0.241	1.34	0.23	-0.198	0.237	0.642	0.594	-0.235							-1.08	-1.02	-0.427	-0.22	0.266	-0.107	-0.959
1.08	1.04	-0.916	0.154	0.176	0.251	1.28	-0.241							-0.11	-0.129	-0.655	0.187	-0.511	1.81	0.576
0.37	0.274	-0.714	-0.548	1.04	0.911	0.129	-0.898							0.776	0.659	-0.557	-0.0812	0.615	2.22	-0.608
0.282	1.03	-0.426	0.325	0.2	0.618	0.808	-1.07							-0.166	0.102	-0.848	0.416	0.272	1.61	-1.46
-0.16	0.872	-0.591	-0.181	0.95	0.0956	-0.426	-1.23							-0.109	-1.16	-0.516	0.548	-0.305	-0.699	-0.734
0.211	1.18	-0.0955	-1.32	0.585	-0.427	-0.0365	-0.459							0.202	0.107	-0.303	-0.205	-0.859	-1.05	-0.488
0.155	1.49	-0.0669	-0.801	0.25	-0.85	1.1	-0.664							1.29	0.736	-0.339	0.00394	-0.921	-1.35	-0.668
0.679	0.691	-0.428	0.00479	0.39	-0.67	1.27	-1.12							1.81	0.305	-0.504	-0.0681	0.345	0.801	-0.371
0.832	-0.61	0.289	-0.149	-0.874	-0.0539	0.756	-1.21							0.922	0.152	-0.421	0.00161	-0.437	0.718	-0.789
1.37	1.56	-0.125	0.223	0.018	0.164	1.46	-0.874							0.365	0.177	-0.398	-0.0708	0.851	1.17	-1.2
0.738	0.737	-0.106	0.39	0.242	-0.537	1.49	-1.14							-0.442	1.03	0.0709	-0.663	0.756	1.15	-0.653
1.11	1.15	-0.437	0.0198	0.49	-0.505	0.033	-0.426							0.595	-0.284	-0.26	-0.177	0.14	1.18	-0.498
0.232	1.47	-0.65	-0.73	0.692	-1.16	0.891	-0.417							0.895	0.86	-0.43	-1.04	0.643	0.146	-0.438
0.515	0.478	-1.25	-1.2	-0.777	-0.384	1.17	-0.646							0.19	0.594	-0.459	0.0608	-0.397	1.52	-0.898
0.573	1.35	-0.352	-0.853	-0.389	0.918	0.539	-0.477							0.427	-0.998	-0.35	0.265	-0.0357	1.64	-0.632
0.0927	1.81	-0.119	-0.583	0.276	-0.0296	0.0757	-0.35							-0.636	0.554	-0.725	-0.23	-0.0336	-0.773	-0.323
0.615	2.19	-0.586	-0.0393	0.286	0.792	0.893	-0.536							-1.4	0.798	-0.545	-1.52	-0.255	0.397	-1.79
0.318	1.32	0.329	-0.849	0.327	1.41	1.35	-1.14							-1.6	0.127	-0.335	-0.304	-0.445	-0.784	-0.836
-0.198	0.875	-0.0826	-0.612	0.547	0.941	-0.977	-0.942							-0.819	0.416	-0.336	-0.147	-0.729	-0.304	-1.12
0.386	-0.0157	0.182	-0.573	0.727	-0.0942	-0.0457	-0.837							-0.276	0.2	-0.528	-0.912	-0.122	0.329	-1.53
0.512	-0.282	-0.502	-0.635	0.0559	-0.672	0.433	-1.34							-0.776	2.03	-0.523	-0.442	0.222	1.36	-0.617
0.0299	1.14	-0.545	-1.18	0.771	-0.503	-0.318	-1.86							-1.56	0.808	-0.344	0.0786	-0.35	0.291	0.00171
-0.0843	0.232	-0.581	0.139	1.34	0.665	-0.0903	-1.35							-2.16	0.226	0.306	-0.321	0.756	0.917	-1.04
0.838	1.71	-0.617	-0.281	0.981	-0.635	-0.31	-2.13							-1.11	0.828	0.299	-0.515	-0.464	-0.108	-1.72
0.388	1.47	-0.167	-0.746	0.691	-0.476	-0.0578	-1.81							-1.68	1.38	0.326	-0.969	0.0152	0.776	0.0796
-0.126	1.43	0.144	0.0304	0.795	-1	0.219	-1.54							-1.81	0.948	1.18	-0.164	-0.424	0.758	0.0081
0.0963	-0.252	1.06	-0.0303	1.66	0.171	-0.666	-1.46							-1.38	0.409	2.94	-0.445	-0.175	1.3	-0.67
0.0117	0.0374	0.396	-0.28	1.24	0.293	-0.192	-1.79							-1.4	-0.459	3.71	0.33	-0.63	0.7	-1
-0.865	1.01	0.525	-0.0446	0.953	0.708	0.668	-1.58							-1.36	0.475	4.13	-0.202	-0.892	0.767	-0.981
-0.757	-0.182	-0.0971	0.113	0.632	0.393	1.48	-1.31							-0.168	0.558	3.78	-0.197	-1	1.94	0.333
-0.522	0.125	-0.747	-0.0897	0.824	0.961	1.82	-1.84							-0.381	1.96	3.88	0.6	-0.206	0.0615	-1.73
-0.698	-0.162	-0.0654	-0.192	-0.14	0.0623	0.454	-1.76							-0.719	1.32	3.44	-0.0161	-0.688	1.65	-1.02
-0.471	0.545	-0.72	0.257	-1.44	0.17	0.00821	-1.69							-0.0565	0.283	2.97	-0.627	-0.013	0.982	-0.208
-0.491	-0.00505	0.133	0.306	-2.13	0.504	1.31	-1.9							-0.478	0.182	3.18	-0.0581	2.57	1.6	-0.363
-0.718	0.913	-0.836	0.318	-1.38	0.529	1.2	-2.06							0.279	1.84	2.31	0.12	2.6	0.561	-0.732
-0.52	-0.0175	-0.123	0.0461	-1.63	1.15	1.86	-2							-0.656	0.684	2.4	-0.519	2.36	-0.532	-0.61
-0.249	0.769	-0.736	-0.48	-1.01	0.261	1.54	-1.79							-0.0574	0.0723	2.43	-0.757	1.97	-0.519	-1.77
-0.484	0.0589	-0.36	0.484	-1.21	0.445	1.19	-1.57							-0.838	0.897	1.91	-0.338	1.55	1.45	-2.55
-0.0185	-0.113	-0.411	0.122	-1.3	-0.211	1.36	-1.23							-1.4	0.796	1.88	-0.861	1.81	1.26	-1.81
-0.372	0.563	0.16	-0.691	-0.53	-1.22	1.81	-1.54							-0.414	0.945	2.04	-0.73	1.65	-0.509	-0.803
-0.805	1.45	-1.14	-0.674	-0.393	-1.39	0.639	-0.883							-0.508	1.83	1.71	-0.749	2.02	0.728	-1.14
-1.01	2.28	-0.537	0.298	0.245	-1.89	0.748	-1.05							-0.111	0.853	1.28	-0.519	2.31	-0.0765	-2.34
-0.786	2.04	0.722	-0.638	-0.598	-0.133	-0.605	-1.17							1.64	0.601	1.58	-0.0631	1.62	0.86	-1.92
-0.546	0.515	0.238	0.0339	-0.706	-1.54	-0.0662	-1.66							2.1	0.485	1.07	-0.678	1.42	1.01	-1.64
-0.082	0.248	0.984	-0.0696	-0.492	0.458	-0.689	-1.18							1.45	0.978	1.35	-0.678	2.03	-0.0243	-1.73
0.543	-0.342	0.728	-0.297	-0.535	0.263	-0.512	-1.27							1.68	0.628	0.596	-0.714	1.32	-0.746	-1.3
0.121	-0.0382	0.909	-1.5	-0.387	0.135	-0.68	-0.999							0.966	0.0272	0.984	-0.605	0.688	-0.529	-1
-0.204	0.845	0.646	-0.376	0.333	0.715	-0.654	-1.43							1.08	0.775	1.26	-0.234	0.966	-0.0204	-0.66
-0.852	-0.437	0.434	0.419	0.00983	0.21	-2.26	-1.04							0.529	0.847	1.19	-0.314	1.53	1.46	0.577
-0.721	0.759	1.14	1.02	0.465	0.046	-1.65	-0.562							0.131	0.485	0.897	0.119	0.695	0.699	0.537
-0.641	1.19	1.44	1.05	-0.338	-0.654	-0.158	-0.788							0.186	0.571	1.21	-0.514	0.455	1.75	-0.247
-0.708	1.9	0.968	0.62	-0.232	-2.09	0.519	-0.52							-0.426	-0.763	1.72	-0.974	0.287	-0.312	-0.451
-0.673	0.738	1.04	0.0121	-0.3	-1.32	0.374	-0.689							-0.0571	-0.339	0.669	-0.842	-0.0131	-1.41	-1.33
-0.885	-0.181	0.862	-0.302	0.0468	-0.834	0.205	0.252							-0.00467	0.359	0.619	-0.369	0.332	0.14	-1.37
-0.916	-0.0527	1.19	-0.137	-1.3	-0.77	1.09	0.181							-0.352	-0.424	0.442	-0.641	0.0513	1.21	-0.418
-0.745	1.15	0.839	0.281	-0.572	-0.03	1.37	0.373							-0.346	-0.269	-0.0759	-0.37	0.409	0.314	-1.32
-0.38	1.85	-0.201	0.385	-0.7	-0.234	1.35	-0.111							0.574	-0.684	0.291	-0.657	0.0651	2.28	-1.13
-0.72	2.1	0.587	-0.325	-1.03	-0.875	0.594	-0.478							-0.68	0.296	0.477	0.103	0.42	0.806	-1.84
-0.875	0.991	0.788	-0.691	-1.71	-0.781	0.246	-0.451							-0.721	0.289	0.715	-0.452	-0.918	0.723	-2.04
-1.08	1.02	-0.0871	0.29	-1.64	-0.705	0.873	-1.05							-1.22	-1.38	0.158	-0.662	-0.97	-1.55	-1.56
-1.58	1.18	0.00607	0.793	-0.968	-0.946	-0.403	-0.799							-1.23	1.36	-0.26	-0.0131	-0.371	-1.43	-1.97
-1.52	0.052	-0.437	1.39	-1.17	-0.533	-0.146	-0.516							0.165	1.88	-0.479	-0.506	-0.361	0.426	-1.31
-0.633	-0.0251	-0.259	1.13	-1.49	0.191	0.102	-0.751							-0.188	-0.765	-0.161	-0.275	0.151	1.83	-0.644
-1.2	-0.736	0.365	3.1	-1.11	-0.883	0.683	0.144							0.25	-1.36	0.368	-0.534	0.59	0.852	0.274
-1.33	0.617	0.151	4.44	-0.511	-0.927	0.762	0.803							-0.000986	0.826	0.445	-0.916	0.467	2.33	1.5
-0.929	-0.232	0.775	4.05	-0.353	-0.927	0.294	1.33							-0.826	-0.36	0.502	-1.11	0.535	0.618	0.781
-0.444	-0.0103	0.561	3.71	0.0533	1.56	0.313	1.24							-0.0931	0.362	0.0708	-1.17	-0.205	0.76	-0.194
-0.41	0.155	0.795	2.13	-0.249	1.34	0.541	1.17							0.636	-1.49	0.162	-0.76	0.706	-1.31	0.35
-0.628	-0.233	1.44	1.71	-0.707	2.36	-1.24	0.566							1.91	-1.2	0.306	-0.6	0.591	-0.0578	0.313
-0.29	0.17	0.211	2.36	-1.27	0.825	0.0178	0.521							1.57	-0.758	1.04	-0.212	0.264	-0.219	-0.144
-0.338	-0.704	1.2	1.84	-0.452	1.27	-0.25	0.979							1.05	0.947	0.73	-0.399	0.537	0.43	-0.58
-0.766	-0.0166	0.56	1.41	-0.961	0.975	0.712	0.404							0.972	-0.636	0.716	-0.0882	-0.014	0.363	-0.577
-1.01	-0.428	1.61	1.44	-0.647	-0.00418	0.864	1.45							1.04	-0.22	0.755	-0.768	-0.309	0.124	0.14
-1.12	0.415	0.439	0.918	-0.362	0.429	0.0129	1.22							0.318	-0.0325	0.395	-0.681	0.319	1.13	0.61
-1.83	0.138	0.203	1.12	-0.087	0.156	-0.519	0.992							-0.817	-0.882	0.533	-1.31	0.163	-1.79	-0.205
-1.48	-0.0501	0.284	0.951	0.227	0.903	0.799	0.691							-0.102	-0.466	0.289	-1.24	0.712	-1.06	1.71
-1.46	0.4	0.228	1.22	-0.0945	1.9	-0.329	1.26							-0.993	-0.651	0.607	-0.932	0.288	-1.23	1.37
-1.22	0.445	1.25	1.05	0.0738	1.34	-0.379	0.686							-0.0631	0.193	0.751	-0.683	0.757	-0.0873	0.928
-2.03	-0.315	0.00162	0.889	-0.233	0.84	0.395	0.983							0.482	0.356	1.52	-0.584	1.19	-0.193	1.16
-1.53	0.635	0.00953	0.331	-0.744	-1.01	0.707	0.651							-1.07	-1.3	1.38	-0.966	0.709	1.73	0.579
-0.593	0.128	-0.00782	0.827	0.0314	0.039	0.532	0.492							-0.245	-1.37	1.92	-1.35	1.11	0.395	0.787
-0.978	1.71	1.4	-0.516	-0.293	-0.755	-0.0779	0.647							0.378	0.0864	1.47	-1.1	0.823	0.976	1.09
-1.37	-0.0568	0.67	0.0485	0.0651	0.578	0.36	0.825							-0.0393	0.197	1.71	-0.177	0.836	1.06	0.391
-1.94	-0.83	0.681	1.18	-0.0476	-0.809	1.7	0.166							-0.958	-0.194	1.29	-0.593	0.26	-0.468	0.982
-1.43	0.0941	0.245	0.782	0.000383	0.813	0.386	0.533							-1.37	-0.961	1.44	-0.63	0.237	-0.148	0.778
-1.78	-0.766	0.546	0.727	0.161	1.06	-0.644	0.355							0.125	0.505	0.788	0.182	1.55	-0.825	1.29
-2.11	-0.155	-0.634	1.45	0.716	0.644	-0.271	1.11							0.061	-0.129	1.35	-0.595	0.33	0.945	1.03
-1.81	-0.371	0.925	0.466	1.14	0.747	-0.21	0.832							-0.0405	0.316	1.41	-0.821	0.307	-1.36	0.0447
-1.85	-0.163	-0.229	0.695	0.35	2.12	0.372	0.815							-1.22	1.18	1.51	-0.656	0.796	0.846	-0.239
-1.73	1.04	0.499	1.63	-1.14	0.93	0.5	0.683							-0.223	-0.104	2.13	-0.766	1.13	-0.924	0.876
-1.57	0.254	0.53	0.87	-0.621	0.457	1.16	1.11							-0.0525	-0.476	1.22	-0.498	1.83	-1.38	0.191
-1.15	0.335	0.454	1.33	-0.406	0.602	0.645	1.03							-0.107	-0.328	1.25	-1.38	1.49	-0.615	-0.232
-0.959	-1.78	-0.583	2.11	-1.14	1.49	1.62	0.441							-0.0545	-0.689	1.41	-0.966	2.3	-0.285	0.284
-1.11	-0.105	-0.0055	2.09	-0.922	1.08	1.33	0.358							0.248	-0.399	0.972	-1.01	2.16	0.552	-0.71
-1.4	-0.341	-0.304	1.98	-1.29	0.484	0.927	0.629							-0.231	0.0884	1.11	-1.49	1.91	1.35	-0.171
-1.54	0.514	-0.509	1.23	-0.455	0.205	1.4	0.271							-0.765	-0.00476	1.18	-1.12	2.03	-0.795	-0.868
-1.83	-0.211	-1.4	0.799	0.101	-0.151	0.924	0.735							-0.56	0.578	1.37	-1.47	1.78	-0.167	0.137
-1.85	1.7	-1.01	0.674	0.171	0.964	1.61	1.14							-0.671	0.894	1.26	-1.5	0.933	-1.11	-0.399
-1.27	0.658	-0.442	1.03	0.489	0.016	1.18	0.965							0.0943	-0.0321	1.19	-1.77	0.796	-0.0818	0.26
-0.681	-0.446	0.735	0.878	0.46	-0.248	0.579	1.18							-0.515	0.141	1.29	-1.2	0.827	0.342	-1.85
-0.763	-0.458	0.485	1.61	0.089	0.426	-0.171	0.911							-0.224	0.0327	0.499	-1.6	0.489	-1.21	-1.1
-0.8	-0.458	-0.218	0.296	0.571	0.838	-0.188	0.855							-0.428	-0.567	0.634	-1.61	0.293	0.11	-0.283
-0.399	0.132	0.0749	0.0934	-0.309	0.205	-0.453	0.979							-0.216	2.06	0.851	-1.66	0.618	-0.325	0.309
-0.297	-0.811	0.133	0.317	-0.251	1.4	-0.423	0.971							-0.781	0.585	1.03	-1.68	0.557	-0.686	-0.854
-0.823	-0.139	0.23	0.345	-0.4	-0.113	-0.787	0.703							-0.717	1.02	1.13	-0.743	1.28	-2.19	-0.612
-0.393	-0.14	-0.387	-0.162	-1.44	-1.34	-1.34	0.741							-0.19	-0.237	1.37	-1.99	0.671	-0.412	-0.185
-0.907	-0.332	-0.546	0.443	-1.65	-0.051	-1.07	1.64							-0.575	0.928	0.885	-1.42	1.86	-1.15	0.378
-1.4	-0.193	0.266	0.846	-1.85	-0.613	-1.56	0.919							-0.563	0.679	0.518	-0.822	1.16	-1.75	-0.451
-1.43	-1.59	0.695	-0.229	-2.23	0.0346	0.089	1.14							-1.85	1.9	0.512	-0.535	0.282	-0.868	1.32
-1.22	-2.07	-0.323	-0.456	-2.43	-1.31	-0.682	0.807							-0.888	1.94	0.453	-1.2	0.263	0.555	0.581
-1.1	-1.53	-0.392	-1.13	-2.24	-2.04	0.902	0.96							0.794	1.04	0.381	-1.43	0.917	-0.397	0.0554
-0.96	-1.52	0.988	0.0195	-1.92	-2.48	-0.4	1.37							1.05	0.561	0.354	-0.939	0.33	-1.03	-0.34
-1.2	-1.33	-0.491	-0.565	-1.04	-0.411	-0.247	1.99							1.89	-0.869	0.641	-1.46	0.294	-1.28	1.92
-0.666	-1.14	-0.0931	-0.708	-0.742	-0.854	-0.661	1.56							0.73	-0.407	1.21	-1.1	-0.00986	-1.4	-0.522
-0.313	-0.716	0.498	0.829	-1.28	-0.244	-0.206	2.13							0.407	-0.39	0.361	-0.513	0.0821	0.106	0.569
-0.185	-0.735	0.638	0.958	-1.85	0.0139	0.425	2.23							0.718	0.164	0.194	-1.54	-0.519	0.524	-0.334
-0.249	-1.71	1.11	-0.0118	-2.15	-0.296	0.13	2.13							1.15	1.25	0.131	-0.816	0.126	1.62	0.507
0.0127	-2	0.84	-0.38	-1.65	-0.106	0.596	2.09							1.12	0.0869	0.273	-1.47	0.145	-1.16	0.277
0.011	-1.18	0.233	0.235	-2.19	-0.257	-0.077	2							0.447	-1.13	-0.0398	-0.947	1.21	0.338	1.3
-1.1	-1.57	-0.402	0.576	-2.1	0.638	0.0636	1.9							-0.33	-0.719	0.194	-0.989	0.443	-0.344	0.625
-0.456	-1.87	1.25	0.414	-1.87	0.94	0.353	2.86							0.36	0.667	-0.129	-1.08	0.613	-0.363	0.908
-0.952	-1.68	0.628	0.589	-1.75	2.28	-0.101	3.1							0.592	-1.08	0.0573	-1.45	-0.103	0.717	-0.562
-1.01	-0.673	0.574	-0.0159	-2.24	0.489	0.479	2.47							1.07	-0.627	-0.141	-0.793	-0.197	0.644	-0.367
-0.945	-0.8	0.576	-1.01	-2.43	2.11	0.249	2.42							0.268	2.81	-0.255	-1.49	-0.841	0.234	0.389
-0.744	-0.0523	-0.585	0.24	-3.1	1.15	-0.436	2.71							1.45	1.42	-0.539	-1.21	-0.654	1.08	-0.328
-0.802	-1.12	0.336	1.21	-3.8	-0.0318	-0.432	2.16							0.259	2.5	0.162	-1.17	0.261	0.857	-0.837
-1.27	-0.903	0.568	1.26	-2.74	0.659	-0.305	2.24							0.757	1.94	0.418	-0.786	0.103	1.34	-0.493
-1.88	-1.51	-0.485	0.418	-2.49	0.345	-0.997	2.12							0.0552	2.81	0.573	-1.55	-0.446	-1.43	-0.282
-1.7	-1.36	0.352	0.164	-2.77	-0.238	-0.534	2.27							0.16	2.27	0.558	-1.28	0.284	1.15	0.179
-1.5	-2.01	-0.258	0.0157	-2.85	-0.448	-1.29	1.53							-0.0595	1.27	0.837	-1.3	0.199	0.131	-0.388
-1.16	-1.31	-0.712	0.109	-2.81	0.465	-0.983	1.71							0.615	2.07	0.734	-0.971	-0.295	0.223	-0.178
-0.795	-0.433	-0.126	-0.0959	-1.42	0.496	-0.199	1.63							1.78	2.48	1.08	-0.775	0.503	-0.312	0.5
-0.926	-0.344	-0.062	-0.284	-1.94	-0.201	-1.15	1.04							1.47	1.71	0.778	-0.643	0.887	-1.34	0.311
-1.06	-1.12	0.259	0.688	-1.47	0.658	0.124	0.439							0.883	0.177	0.59	-0.568	0.272	-0.726	-0.148
-0.476	-1.25	0.323	-0.0445	-0.666	0.833	-0.0481	0.647							0.296	0.0426	0.482	-0.669	-0.0847	-0.708	-0.52
-0.617	-0.933	-0.303	0.515	-1.04	1.15	-0.0127	0.608							0.946	0.561	0.627	-1.62	-0.353	-0.428	0.114
-1.1	-1.27	0.158	-0.0135	-2.39	0.555	0.445	0.948							1.11	2.35	0.527	-0.798	-0.337	0.263	0.179
-0.755	-0.607	0.0121	0.202	-1.71	-0.199	0.326	1.36							1.23	1.39	0.314	-0.58	0.109	-0.772	-1.04
-0.399	-0.286	0.0998	0.101	-0.516	0.118	0.878	1.39							0.8	2.88	0.726	-1.4	-0.0861	0.816	-1.32
-0.247	-0.425	0.000574	-0.258	-0.377	1.82	-0.349	1.13							0.662	0.889	0.66	-0.555	0.0953	0.711	-1.74
-1.05	-0.848	-0.353	-0.467	-0.744	1.77	-0.084	1.07							0.406	0.0947	0.647	-0.473	-0.134	-0.611	-2.23
-1.26	-1.15	0.613	-0.83	-0.915	1.38	-1.37	1.67							-0.391	0.192	0.341	-0.67	-0.246	-1.73	-1.25
-0.643	-1.31	0.028	-0.0981	0.322	0.708	-0.661	1.73							0.526	0.331	0.621	-0.586	0.656	-0.403	-0.8
-1.19	-0.46	-0.523	0.0131	0.785	0.237	-0.949	1.48							0.288	1.47	0.281	-1.26	2.11	0.0396	-1.75
-1.42	-1.31	-0.782	0.163	0.641	0.626	-0.814	1.42							0.0161	0.998	0.0381	-1.28	1.31	1.09	-1.82
-1.39	-1.07	-0.157	-0.204	1.22	-0.599	-1.05	1.66							0.448	1.48	-0.132	-1.57	1.59	-0.201	-2.32
-1.26	-0.854	-0.156	0.172	0.819	-0.46	-0.351	1.45							0.377	0.627	0.513	-0.87	1.2	-0.694	-1.13
-1.25	-0.85	-0.32	-0.767	1.4	2.01	-0.939	0.739							-0.155	0.307	0.299	-0.746	1.09	-1.64	-1.31
-1.2	0.0648	0.46	-0.229	0.776	2.37	-1.1	0.963							0.318	1.35	-0.271	-0.6	0.48	-0.124	0.405
-1.48	-0.699	-0.0637	-0.721	-0.0293	2.97	0.0992	0.559							-0.687	-0.0741	-0.342	-0.658	0.926	0.911	0.557
-1.29	0.126	0.0815	-0.115	-0.643	1.03	-0.647	-0.0709							-0.212	1.85	-0.135	-1.05	0.904	-0.762	0.789
-1.04	-0.159	-0.0495	0.375	-0.702	1.13	-0.504	0.107							0.559	1.71	-0.244	-0.0746	1.36	-1.28	-1.16
-1.35	-0.47	-0.486	-0.0964	-0.804	1.1	0.194	-0.089							-0.183	1.1	-0.106	-0.547	0.418	-0.616	-0.78
-1.16	0.0583	0.379	0.807	0.681	-0.059	0.0803	0.685							-0.584	0.261	-0.21	0.0841	-0.039	0.74	-0.438
-0.856	0.161	-0.469	0.917	-0.0786	0.687	-0.694	0.772							-0.663	-0.117	-0.102	-0.113	-0.386	0.514	0.679
-0.425	-0.424	-0.432	0.475	-0.192	0.25	-0.552	0.147							0.0903	0.082	-0.0128	0.467	-0.904	0.857	-0.845
-0.873	0.122	-0.233	1.1	-0.58	0.708	-0.962	-0.225							0.609	0.42	-0.418	-0.547	-0.479	1.03	-0.31
-0.656	0.0822	-0.702	1.42	-0.597	-0.157	-1.02	-0.0408							0.162	1.28	-0.368	0.666	-0.269	1.15	-0.47
-0.518	0.0161	-1.12	-0.194	-0.6	0.463	0.401	-0.373							-0.32	0.969	-0.684	0.477	0.051	0.239	0.232
-0.601	0.239	-1.29	1.23	-0.735	1.5	-0.265	-0.28							-0.999	0.442	-0.769	0.972	0.314	0.039	-0.516
-0.72	1.41	-0.564	1.69	-0.313	0.514	-0.62	0.276							-1.1	0.369	-0.996	0.504	-1.41	-1.51	-0.879
-0.211	-0.0793	-0.058	1.14	0.302	0.0923	0.134	1.24							-0.814	-0.0925	-0.943	1.08	-0.605	0.0259	-1.85
0.114	-0.196	-0.00865	1.59	0.588	-0.585	-0.845	1.95							0.133	0.959	-0.888	0.918	0.638	1.04	0.187
0.128	-0.185	2.71	1.32	0.0483	-0.175	0.46	1.88							-0.917	0.391	-0.757	1.01	0.85	0.439	-0.637
0.568	-1.12	0.707	1.59	-0.0135	-1.36	-0.423	1.6							-1.03	0.634	-0.898	0.89	0.305	1.58	-0.307
0.0237	-0.477	0.259	0.742	0.26	-2.07	-0.28	1.94							-1.39	1.72	-0.959	2	0.53	0.753	-1.17
0.372	-0.666	0.803	1.66	0.0891	-0.456	-0.331	1.69							-0.754	0.98	-0.847	2.58	0.381	0.16	-0.641
-0.16	-0.0115	0.846	2.21	0.0686	0.493	-0.824	1.76							-0.968	1.66	-0.565	1.96	-0.232	-1.47	-0.893
-0.227	-0.23	0.452	2.79	-0.417	-0.411	-1.65	1.11							-0.574	-1.13	-0.679	2.2	-0.403	-0.336	-1.12
0.332	0.128	0.235	2.78	-0.227	-0.067	-1.45	1.4							-1.17	-0.0134	-0.942	2.25	-0.492	1	-1.57
-0.296	0.913	-0.152	3.03	0.5	-1.07	-1.12	0.971							0.455	0.3	-0.327	2.14	0.191	0.937	-1.48
-0.0781	-0.33	1.42	2.38	0.148	-0.661	-0.928	1.15							2.02	0.279	-0.732	1.61	-0.189	0.693	-0.541
-0.432	-1.16	2.2	2.73	0.282	-1.17	-1.63	1.4							3.07	0.713	-0.589	2.04	0.696	0.507	0.933
-0.805	0.8	1.88	2.18	0.493	-1.36	-0.551	0.944							1.81	0.605	-0.826	1.72	0.945	-0.578	0.28
-0.821	0.589	0.641	2.05	-0.172	-0.843	-0.734	1.41							1.99	0.698	-0.699	1.79	-0.462	-1.03	0.625
1.11	0.474	1.19	2.07	0.497	-1.56	-1.41	0.986							0.953	-0.839	-0.531	1.48	-0.609	-0.878	0.144
1.12	1.17	0.808	0.964	0.692	-0.614	-1.33	1.17							1.14	0.281	-0.709	2.78	-0.288	-0.467	-0.916
1.03	0.44	1.89	1.74	0.607	-1.62	0.0555	1.92							0.446	0.752	-0.602	2.61	-0.616	0.558	-0.601
0.321	0.281	1.01	2.07	0.647	0.203	0.547	2.19							0.101	1.71	-0.617	2.2	-1.02	0.25	-0.832
0.466	0.114	0.434	1.67	0.772	-0.156	0.66	1.38							-0.214	-0.201	-0.716	3.18	-1.46	-0.948	0.343
0.127	0.111	-0.0438	2.09	0.134	0.772	0.142	1.39							0.74	0.123	-0.611	2.64	-0.773	-0.514	0.276
0.136	0.19	0.118	2.16	0.337	-0.0707	0.352	1.44							1.3	-0.129	-0.434	1.83	-1.01	1.16	-1.47
0.385	0.457	0.826	2.08	0.257	-0.551	0.119	1.26							0.116	0.975	-0.447	1.92	-1.06	-0.21	-1.07
0.0935	0.402	0.764	1.49	0.247	0.924	-0.764	1.56							1.07	-1.16	-0.265	2.13	-1.18	0.865	-1.31
-0.175	0.501	0.0571	1.33	0.64	-1.13	-0.623	0.852							1.1	0.568	-0.576	1.71	-1.26	0.901	-0.297
-0.323	0.0561	0.27	1.28	0.149	-1.13	-0.0289	0.474							0.909	-0.317	-0.416	1.86	-1.23	0.352	-0.671
-0.574	0.523	0.558	0.889	0.727	-0.039	-1.17	0.454							0.175	-0.574	-0.812	1.36	-1.06	-0.882	-0.953
-0.525	0.612	0.568	0.541	-0.155	0.952	-0.897	0.847							0.852	-0.937	-0.618	1.63	-0.467	-2.15	-0.21
0.354	0.524	0.629	0.306	0.241	0.563	-0.242	0.962							0.294	0.258	0.0314	1.85	-1.15	-0.805	0.0771
0.465	0.00989	0.0787	0.645	0.202	0.698	-0.145	0.393							0.796	0.0593	0.0344	2.02	-0.717	-1.43	-0.531
0.0937	1.18	0.196	0.941	0.634	0.892	-0.121	0.761							-0.193	-0.84	-0.0782	1.61	-1.15	-2.73	1.23
0.313	0.305	-0.264	0.282	0.3	-0.357	-1.01	0.901							-0.318	-0.478	-0.173	0.641	-0.553	-2.64	1.15
0.576	0.47	0.0376	0.108	-0.271	0.215	-1.08	1.44							0.744	-0.635	-0.277	1.69	0.00378	-1.95	0.0794
0.348	0.305	0.346	-0.161	-0.229	-0.151	-1.1	0.638							0.275	-0.384	0.174	1.81	-0.497	-1.56	0.832
-0.256	0.83	0.581	0.349	-0.184	1.21	-0.914	0.613							-0.408	-1.32	0.956	2.16	-0.649	-1.7	0.623
0.678	-0.352	0.183	0.136	0.567	0.918	-0.433	1.01							-0.327	-1.51	0.686	1.83	-0.469	-1.91	0.307
0.812	0.378	-0.695	0.152	1.12	-0.97	-1.57	1.11							0.031	0.00304	0.812	1.57	-0.333	-2.73	-0.67
1.01	-1.21	-0.476	-0.276	0.792	-0.0626	-1.62	0.82							0.13	-1.36	0.474	2.11	-0.163	-1.38	-1.25
1.22	-0.418	-0.393	0.096	0.836	-1.69	-1.45	0.353							0.229	-1.29	0.562	1.68	-0.181	-1.07	-0.835
2.12	-0.836	0.341	0.669	0.701	-0.027	-1.63	0.567							0.384	-1.55	0.45	1.39	-0.339	-2.38	-0.0348
1.92	-0.699	-0.319	0.193	-0.293	-0.548	-0.502	0.42							1.05	-1.36	0.57	1.38	-0.258	-2.54	-0.259
1.97	-0.646	-0.279	0.0375	0.505	0.453	-1.26	0.121							0.987	-0.952	0.46	2	-0.567	0.154	0.715
1.84	0.0748	0.732	-0.0202	0.299	0.445	-1.46	-0.302							1.39	-0.263	0.286	1.15	-1	-1.13	0.298
1.43	-0.558	0.675	0.548	-0.286	-1.26	-2.19	0.247							-0.0512	-0.562	0.162	1.51	-0.186	-1.27	0.289
1.41	0.0016	-0.0422	0.516	0.331	-0.0325	-1.32	0.382							0.507	-0.588	0.423	0.786	-0.311	-1.36	0.595
1.75	-0.114	0.184	0.657	0.457	-1.08	-1.09	-0.228							1.03	-1.3	0.531	1.29	-0.147	-1.12	0.0516
1.59	0.0706	1.06	0.487	0.304	-0.92	-1.45	-0.0881							0.0249	-1.98	-0.0179	0.947	-0.353	0.055	-0.757
1.2	-0.77	0.65	0.725	-0.0858	-0.355	-0.0943	-0.201							-0.145	-1.25	-0.274	1.18	-0.0979	-0.642	0.529
1.13	-0.704	-0.244	0.497	0.913	-1.31	-1.58	-1.35							-0.33	-0.741	-0.556	1.61	-0.837	-0.671	0.636
0.932	-0.75	0.665	0.248	0.889	-0.396	-0.932	-1.08							-0.00291	-1.14	-0.495	1.82	-0.866	0.103	-0.654
0.779	-0.56	1.27	-0.561	0.476	-1.11	-1.51	-0.13							-0.68	0.913	-0.209	1.9	-1.18	-0.951	-0.282
0.428	-0.489	-0.107	-0.644	0.566	-0.513	-0.216	0.511							0.127	0.688	-0.242	2.36	-0.773	-0.386	-0.651
0.0845	-0.659	0.141	-0.194	0.28	-1.72	-1.28	0.504							-0.0538	-1.28	-0.645	1.66	-1.01	-0.305	-0.14
-0.188	-0.738	-0.442	0.27	-0.087	-0.487	-1.3	0.83							-0.269	-1.2	-0.288	1.57	-0.0187	-0.617	-0.471
0.626	-0.332	-0.758	-0.713	0.361	1.42	-1.61	0.495							-0.395	-0.822	-0.362	1.97	-0.454	-0.647	0.448
1.06	-0.603	0.00414	-0.533	-0.023	-0.205	-1.61	0.415							-0.362	0.0594	-0.326	2.08	-1.06	-0.516	0.398
0.979	-1.02	-1.16	0.871	-0.0286	-0.345	-2.5	0.184							-1.16	0.0259	-0.489	0.996	-0.302	-0.851	-0.0925
1.18	-0.36	-0.364	0.737	0.542	0.0626	-2.08	0.0792							-0.681	-0.518	-0.347	1.01	-0.642	-2.09	-1.06
0.864	0.247	-0.524	0.825	-0.192	0.8	-2.17	-0.0227							-0.752	-1.07	-0.812	1.73	0.41	-1.28	-1.13
0.831	-0.0424	0.526	0.883	0.496	-0.763	-1.51	0.606							-0.688	0.241	-0.665	0.931	-0.176	-0.0446	-0.86
1.2	-0.611	-0.364	-0.5	0.0163	-0.13	-1	0.0659							-0.232	-1.62	-0.734	2.1	-0.326	-0.813	-1.19
1.17	-1.25	0.242	0.385	0.27	-0.115	-1.05	-0.211							-0.592	-1.45	-0.759	1.5	-0.421	-0.213	-0.0745
1.05	-1.61	0.361	1.29	-0.214	0.659	-1.71	0.229							-0.46	1.09	-1.49	1.64	-0.978	-0.625	0.972
1.07	-2.32	-0.575	0.467	-0.0938	1.13	-0.721	-0.476							-0.466	-0.409	-1.4	1.36	-0.969	-1.5	1.69
1.23	-1.51	-0.802	1.23	0.638	-0.428	-1.35	-0.415							-1.42	-0.548	-1.59	2.03	-0.344	-1.78	0.819
1.32	-0.223	-0.179	1.63	0.586	0.319	-0.664	0.562							-0.621	-1.47	-1.19	2.27	-1.12	-0.174	-0.746
1.52	-0.89	0.229	1.32	0.999	0.11	-0.0584	-0.452							-0.548	-1.94	-1.82	2.3	0.187	-0.139	-0.601
1.27	-1.15	-0.00959	1.35	1.09	0.113	-0.862	-0.715							0.162	1.46	-1.43	1.85	-0.0436	-0.297	-0.504
1.08	-1.99	-0.574	1.5	-0.141	0.128	-1.1	-0.757							-1.23	-0.668	-1.27	1.49	-0.761	-1.32	-1.23
0.708	-1.08	-0.591	0.572	-0.127	0.489	-0.114	-0.708							-0.59	-0.48	-1.27	2.19	-1.73	-0.887	0.477
1.04	-1.3	-0.416	1.1	-0.128	0.77	-1.54	-0.44							-0.707	-0.726	-0.869	1.4	-0.943	-0.766	0.278
1.16	-0.573	0.0587	0.216	0.904	-0.0393	-0.555	-0.174							-0.299	-1.29	-0.623	1.28	-1.1	0.307	0.28
0.826	-1.16	1.08	0.683	0.563	0.014	-1.19	-0.496							-0.451	-1.43	-0.682	2.47	-0.425	0.155	-0.435
0.491	-1.98	1.56	-0.0801	0.802	0.953	0.0901	-0.98							-0.746	-0.435	-1.33	1.37	-0.716	-0.418	-0.383
0.696	-3.06	0.259	-0.226	0.929	-0.285	-0.0939	-0.727							-0.831	-1.43	-1.93	1.79	-0.988	-1.05	-0.525
0.554	-1.98	-0.427	-0.15	1.21	1.22	0.22	-0.844							0.178	-0.862	-1.29	1.38	-0.305	-0.862	-0.945
0.309	-1.17	0.232	0.717	2.23	1.24	-0.696	0.217							-0.882	-0.671	-1.01	1.2	0.262	0.334	-0.669
0.429	-1.66	0.0679	0.527	2.41	1.77	-0.504	-0.168							-0.827	0.0848	-1.37	1.14	0.381	-0.866	-0.286
0.0439	-1.94	0.509	0.275	1.85	2.14	-0.14	-0.784							-0.114	-1.23	-1.12	0.861	-0.23	-1.45	-0.034
0.315	-0.915	-0.19	0.266	2.1	1.3	0.344	0.0539							0.131	-0.705	-0.997	0.896	-0.64	-0.385	0.828
0.4	-1.48	-0.25	-0.527	2.94	3.31	-0.196	-0.274							0.62	-0.533	-1.49	1.46	-0.932	-0.426	-0.456
0.286	-1.71	0.506	-0.78	2.33	2.58	0.0685	-0.124							0.0136	-0.912	-1.69	1.62	-0.146	1.3	-0.0117
-0.23	-1.53	-0.225	0.291	2.37	1.86	-0.0545	-0.31							0.0877	-1.86	-1.86	1.28	-0.63	0.151	-0.254
-0.48	-1.27	-0.283	0.484	2.47	0.907	0.00943	0.368							-0.202	-0.753	-1.75	1.17	-0.525	-0.62	-1.07
-0.45	-1.1	-0.376	1.62	2.09	0.192	0.276	0.0959							0.135	-1.13	-2	1.47	-0.142	-0.755	-1.11
-0.119	-0.52	0.914	1.72	2.29	0.0753	-0.427	-0.201							0.138	-0.0429	-1.83	1.55	-0.545	-0.443	-0.328
-0.955	-1.04	0.793	1.41	2.12	-0.148	-0.624	0.0747							0.0263	-2.17	-1.51	0.852	-0.765	1.19	-0.392
-0.7	-0.578	0.233	1.09	1.97	1.32	-0.144	-0.39							-0.515	-1.6	-2.01	1.69	-0.395	-0.364	-0.296
-0.372	-0.869	0.684	1.52	2.82	0.863	-0.206	0.0191							-0.56	-1.01	-2.04	0.781	-0.493	-1.06	-0.672
-0.356	-1.34	1.83	1.54	2.35	0.292	-0.499	-0.356							-1.19	-1.48	-1.74	1.62	-0.441	-1.73	-0.476
-0.0376	-1.6	1.4	0.479	1.6	0.0521	-0.982	-0.0269							-1.5	-0.113	-1.96	1.02	-0.637	-1.72	0.00226
-0.139	-1.29	0.0274	0.958	1.51	1.22	-1.01	0.23							-0.699	-1.2	-1.86	0.544	-0.46	0.785	-0.547
-0.471	-1.03	0.11	1.01	0.758	1.07	-0.45	-0.473							-0.242	-0.627	-1.47	0.74	-0.396	0.649	-0.217
-0.337	-0.593	0.94	0.704	0.237	0.462	-0.498	-0.55							-1.55	-0.975	-1.39	1.37	-0.25	-0.264	-0.89
-0.33	-0.207	1.02	-0.577	0.205	-0.0523	-1.55	-0.757							-0.0833	-1.05	-0.926	0.34	-0.306	-1.44	0.107
-0.515	-0.871	0.83	0.056	1.31	0.0594	-2.18	0.0494							-0.0479	-0.966	-1.5	0.269	-1.55	-0.382	-0.301
-0.427	-1.16	0.191	-0.393	1.97	-0.365	-2.3	-0.494							-0.368	-0.97	-1.61	0.415	-0.798	-0.342	0.881
0.823	-1.35	0.393	-0.336	1.39	-1.16	-0.735	-0.325							-0.362	0.999	-1.62	0.715	-0.273	-0.496	0.423
0.25	-1.49	-0.281	-0.681	0.0388	-1.25	-0.503	-0.548							-0.443	0.402	-1.49	0.0955	-0.285	-0.505	0.952
-0.64	-1.1	-0.817	-0.505	0.206	-0.656	-0.634	-0.239							-0.338	0.751	-1.09	0.0531	-0.546	0.698	0.971
-0.254	-1.09	-0.39	0.638	1.61	0.235	-1.45	-0.369							-0.399	-0.53	-0.906	0.663	-0.695	0.434	1.52
0.127	-1.02	0.826	0.0203	1.43	1.54	-0.803	-0.393							-0.212	0.386	-0.684	0.282	-1.04	-0.134	0.822
-0.136	-0.172	0.685	-0.071	0.958	1.25	-1.04	0.0211							-0.0725	-0.942	-0.713	-0.259	-0.658	-0.136	0.838
0.0547	-1.42	0.419	-0.434	1.68	1.34	-1.66	0.32							-0.903	-0.862	-0.395	-0.367	-1.03	-0.13	0.757
-0.353	-0.598	0.987	-1.47	1.18	1.19	0.00265	-0.507							-1.52	0.436	-0.904	0.84	-0.543	-0.526	0.176
-0.604	-0.987	0.891	-1.18	0.347	0.36	-0.182	-0.879							-1.27	-1.72	-0.834	0.561	-1.14	-1.46	0.775
-0.184	-0.819	1.02	-0.425	-0.173	0.401	-0.154	-0.399							-1.53	-1.23	-1.37	0.254	-1.52	-1.97	-0.364
0.0513	-1.27	0.967	-0.844	0.525	0.304	-0.291	-0.805							-0.883	-0.384	-1.59	0.106	-2.36	-1.05	-0.226
-0.229	-1.58	2.72	-0.488	0.377	0.475	-0.451	-0.651							-0.727	-0.979	-1.46	-0.0123	-2.25	-0.0707	0.1
-0.571	-0.453	2.43	-0.0991	0.467	0.0306	-1.58	-1.06							-1.33	-2.28	-1.64	-0.173	-1.1	0.363	0.925
-1.02	-1.64	1.84	0.433	-0.306	-0.927	-2.28	-0.644							-1.5	-1.01	-0.522	0.47	-0.463	-0.0903	0.368
-0.315	-1.3	1.17	0.0798	0.395	0.171	-2.11	-0.728							-1.56	-0.959	-0.336	1.05	0.0237	-0.436	1.02
-0.326	-0.856	1.03	0.781	0.179	-2.24	-1.98	-0.557							-0.457	-0.704	-0.339	0.219	-0.811	-0.757	1.12
-0.595	-1.05	0.816	0.333	-0.204	-1.21	-2.32	-0.608							-1.33	-1.88	-0.675	0.601	-1.55	-0.469	3.34
-2.19	0.152	-0.0306	-0.369	0.161	0.51	-1.3	-0.653							-1.28	-0.183	-0.351	-0.383	-1.31	-0.0514	3.47
-1.65	0.188	0.284	-0.723	0.683	0.746	-0.905	-0.465							-1.83	-1.3	-0.0757	0.304	-0.737	0.216	4.49
-0.00578	-0.835	1.17	-0.144	0.617	0.306	-0.96	-0.79							-0.964	0.588	-0.0912	0.139	-1.2	0.175	3.41
0.919	-0.0415	0.918	0.332	0.928	0.193	0.311	-1.21							-1.53	-0.822	-0.0468	0.326	-0.54	-0.0122	4.71
0.795	0.159	1.89	-0.225	0.0517	0.309	0.527	-1.13							-2.18	-1.14	-0.568	-0.241	-1.69	-1.17	3.59
0.718	0.246	0.464	-0.0838	-0.298	0.557	-0.0753	-1.13							-1.82	1.03	-0.25	-0.0343	-1.39	-1.04	3.89
0.379	0.49	1.13	-0.639	0.155	1.79	0.149	-0.992							-1.99	-1.03	-0.563	-0.568	-1.91	0.213	2.67
0.0338	-0.187	0.997	-0.276	-0.432	0.0807	0.681	-0.274							-1.75	-0.492	-0.788	-0.269	-1.56	-0.85	1.98
0.555	0.364	1.47	0.619	0.0542	-0.129	0.384	-0.325							-2.01	-0.37	-0.433	-0.0815	-1.55	-0.00958	1.44
-0.0562	0.518	1.35	-0.276	-0.234	-1.01	0.793	-1.2							-1.63	-1.13	-0.555	-0.419	-1.38	1.04	2.94
-0.566	0.757	1.8	-0.183	-0.278	-0.351	0.384	-1.11							-2.19	-0.271	-0.146	-0.544	-0.542	0.546	1.84
-0.337	1.45	2.17	0.753	-0.433	-0.209	0.394	-1							-1.49	0.0973	-0.734	-0.183	-1.75	-1.52	1.69
-0.521	-0.00633	1.98	-0.38	-0.173	-0.0395	-0.253	-1.31							-1.87	-1.12	-0.376	0.0367	-1.25	-1.91	1.71
0.256	-1.08	1.44	-0.349	-0.0659	0.124	-1.16	-1.01							-1.37	-0.567	0.125	-0.0866	-2.41	-2.44	1.25
0.562	0.58	1.26	-0.353	-0.247	0.162	-0.322	-0.646							-1.87	-1.65	0.000705	-0.721	-1.93	0.646	0.442
-0.276	0.0379	2.46	-0.295	-0.845	-0.156	-1.06	-0.42							-0.931	-0.762	0.299	-0.681	-1.79	1.13	0.459
-0.461	-0.824	1.7	-0.808	-0.36	-0.645	-0.346	-0.87							-1.27	-0.702	0.265	-0.398	-1.66	1.28	0.978
-0.412	-0.359	1.73	0.31	-0.809	-0.0252	-0.565	-0.575							-0.563	-1.52	0.368	-0.716	-1.77	0.982	0.756
-0.839	-0.827	1.69	-0.157	-0.889	1.59	-0.436	-0.721							-0.0189	-1.09	-0.133	-1.33	-1.31	-0.411	-0.256
-0.566	-0.271	1.74	-0.0286	-0.596	1.08	0.144	-0.276							-0.547	-1.12	0.0695	-0.412	-1.81	-0.542	-0.0516
-1.03	-1.37	1.32	-0.32	-1.22	0.487	0.614	-0.659							-1.84	-1.43	0.431	-0.623	-1.72	0.29	-0.782
-0.162	0.0166	1.07	-0.144	-0.717	0.593	0.0509	-0.215							-1.27	-1.66	0.0152	-0.445	-1.1	-0.314	-0.405
-0.388	-1.08	1.31	0.049	0.0109	0.392	1.21	-0.363							-1	-1.01	0.3	-0.47	-1.85	-0.582	0.88
-0.713	-1.44	1.72	-0.0215	-1.05	0.0399	-0.611	-0.458							-0.214	-0.425	0.55	-1.11	-1.37	0.73	0.0584
-0.809	-1.36	0.459	-1.42	-0.761	-0.0553	-0.586	-1.11							0.079	-1.42	0.265	-0.89	-1.31	0.723	-0.574
-0.882	-0.458	1.69	-0.998	-0.478	-0.429	-0.35	-1.04							-0.581	-1.63	0.474	-0.324	-0.712	0.621	0.46
-0.919	-0.524	0.793	-0.19	0.19	0.276	-0.482	-0.835							-0.518	-0.418	0.151	-0.492	-0.0851	-0.11	-0.385
-1.2	-2.02	1.65	0.0917	-0.977	-0.442	0.435	-0.604							-0.812	-1.02	-0.178	-0.0658	-0.202	-1.67	0.307
-0.68	-0.697	0.538	-0.514	-1.66	-0.636	-0.955	-1.11							-0.64	-0.567	-0.0173	-0.415	0.667	-0.487	0.0882
-0.614	-0.921	1.97	-1.12	-0.977	-1.28	-1.25	-0.958							-0.776	-0.466	0.205	-0.633	-0.674	-1.01	0.934
-0.902	-0.813	1.49	-0.905	-0.827	-0.912	-0.66	-0.697							-0.959	-0.585	0.0521	-0.563	-0.633	0.308	0.163
-1.22	-0.615	1.2	-1.36	-0.465	-1.9	0.0944	-0.462							-1.28	0.106	-0.295	-1.1	-1.72	1.36	0.658
-1.15	-1.54	1.09	-1.34	-0.289	-1.7	-0.538	-0.104							-1.07	0.267	-0.141	-0.565	-0.544	-0.0051	1.14
-1.8	-0.129	1.95	-0.804	-2.2	-1.2	-0.598	-0.365							-1.02	0.405	-0.309	-0.53	-1.69	-1.17	0.458
-1.46	0.00309	2.64	-0.98	-1.03	-0.851	-0.786	-0.24							-0.689	0.486	-0.262	0.0682	-1.13	-2.48	0.308
-1.16	0.419	2.57	-0.892	-0.944	-2.27	-1.33	-0.801							-0.864	-1.64	-0.326	0.255	-0.758	-1.23	-0.347
-0.642	0.551	1.74	-0.585	-0.132	-2.34	-1.02	-1.78							-0.687	-0.983	-0.563	-0.77	-1.34	-1.53	-0.23
-1.17	-0.251	1.87	0.369	0.914	-1.93	-0.549	-1.74							-1.57	0.237	-0.441	0.245	-1.55	-0.387	-0.102
-0.495	0.19	2.61	-0.305	0.125	-1.27	-0.109	-2.11							-0.874	-0.0963	-0.281	-0.29	-1.2	0.197	0.339
-0.332	-0.0956	1.75	-0.133	-0.11	-0.133	0.365	-1.62							-0.25	-0.771	0.048	0.41	-2.19	0.859	0.952
0.357	-0.153	1.85	-0.635	0.212	-0.362	-0.422	-1.22							-0.215	-0.476	-0.2	-0.313	-2.88	0.503	0.0152
0.0104	-0.137	1.99	0.0461	0.00505	0.237	0.881	-1.13							1.28	-1.4	-0.77	-0.805	-2.41	-2.46	1.03
-0.26	0.074	2.51	-1.26	0.0574	-0.512	0.335	-1.58							2.23	-1.15	-1.13	-1.25	-1.93	-2.05	0.591
-0.377	0.0762	1.5	-1.37	0.498	-0.459	-0.259	-1.18							1.65	-1.87	-0.971	-0.517	-2.57	-0.309	1.22
0.108	0.748	1.85	-1.26	0.938	-1.15	-0.193	-0.802							1.47	-0.604	-0.328	-0.524	-2.33	0.0497	0.66
-0.322	-0.0611	1.36	-0.426	0.871	-0.312	-0.971	-0.472							1.63	-1.2	0.0391	-0.484	-1.88	-0.929	0.434
-0.855	-0.317	2.25	-0.653	0.765	0.458	-0.355	-0.722							1.29	0.132	0.294	0.101	-1.44	-1.32	1.39
-0.563	1.1	2.16	-0.914	1.6	-0.313	0.0455	-0.603							1.64	-1.83	0.0319	-0.345	-1.52	-0.203	0.534
-0.392	-0.622	0.936	-0.0556	0.976	-0.659	-0.964	-0.798							0.823	-0.0706	-0.0228	-0.85	-0.92	-0.911	0.318
-0.485	-0.684	1.36	-1.86	1.47	-1.37	-1.12	-1.34							1.01	-0.793	-0.148	-0.484	-0.917	0.765	0.853
-1.17	0.00666	1.82	-1.59	1.24	-1.42	-0.419	-1.03							0.739	0.412	0.0839	-0.874	-1.53	0.548	0.286
-0.876	-0.37	2.2	-0.658	1.3	-0.5	0.889	-1.45							0.444	0.132	-0.0497	-0.329	-1.49	1.36	-0.576
-0.832	-0.588	1.74	-1.9	1.21	-0.991	1.05	-1.15							0.252	0.2	-0.147	-0.353	-1.2	2.86	-0.946
-0.895	-0.279	2.28	-1.37	2.04	-1.3	1.46	-0.822							0.381	0.674	0.0885	-0.929	-1.67	1.33	-1.09
-0.763	-0.471	2.26	-1.58	2.11	-1.59	2.52	-1.12							0.197	-0.303	0.191	0.105	-0.303	1.54	-1.42
-0.679	-0.866	1.8	-2.03	1.26	-0.76	1.04	-0.36							0.00141	0.019	-0.299	-0.966	1.34	0.0914	-2.21
-1.29	-0.698	1.69	-1.81	1.67	-0.195	1.33	-0.862							0.576	-1.16	-0.218	-1.23	4.16	0.614	-1.59
-1.15	0.192	1.61	-0.931	1.8	-1.88	0.193	-1.14							0.207	0.982	-0.299	-0.793	3.08	0.261	-1.33
-1.05	0.0321	1.43	-0.682	0.87	-0.882	-0.656	-0.973							0.133	0.333	0.0197	-1.07	4.12	0.876	-1.58
-1.34	-0.419	0.682	-0.771	0.643	-1.15	0.189	-1.56							-0.293	1.26	-0.359	-0.489	3.68	0.0756	-2.67
-1.25	-0.286	1.25	-0.51	1.14	-1.49	-1.52	-1.83							-0.213	1.22	-0.901	-0.405	3.04	0.128	-3.05
-0.892	0.215	0.4	-0.391	0.0482	-0.412	-1.11	-1.56							-1.38	0.861	-0.447	-0.861	2.7	1.05	-1.8
-0.668	-0.138	0.694	-0.348	0.689	-0.318	-1.65	-1.73							-0.927	0.579	-0.684	-0.652	2.54	0.0543	-1.77
-0.282	0.15	0.22	-1.05	0.173	0.0494	-0.492	-2.19							-1.02	0.483	-0.948	-0.987	2.35	-0.417	-2.98
-1.24	-0.902	1.03	-1.09	0.9	-0.949	0.617	-1.59							-0.844	-0.691	-0.975	-0.0825	2.25	-0.688	-2.04
-1.18	-0.464	1.07	-1.82	1.44	-0.379	1.2	0.256							-0.366	1.1	-0.458	-0.156	2.76	-0.608	-0.902
-0.917	-0.276	1.23	-2.25	1.71	0.92	1.65	0.224							-0.268	0.255	-1.14	0.291	1.97	-0.263	-2.61
-0.513	-0.753	2.34	-1.26	1.46	-0.767	0.963	0.0596							-0.948	0.398	-0.876	-0.416	1.85	0.0426	-2.46
-0.924	-0.652	2.22	-1.66	1.81	-1.47	1.49	-0.00973							-0.0541	0.843	-0.881	-0.996	1.44	-1.01	-2.32
-0.76	-1.11	1.56	-1.52	1.56	-1.44	0.42	0.0129							-1.16	0.209	-1.18	-0.37	1.69	-1.04	-1.92
-1.6	-0.512	1.02	-1.28	1.47	0.442	0.738	-0.939							-1.09	-0.0136	-0.974	-0.413	1.3	0.636	-2.52
-1.51	-0.957	1.19	-2.09	1.24	0.423	0.521	-0.836							-0.887	0.158	-0.925	-0.221	1.07	-0.156	-1.38
-1.53	-1.66	0.734	-2.99	0.717	-1.34	0.0112	-1.11							-0.119	-0.394	-0.399	-0.145	1.14	0.675	-1.06
-1.45	-1.96	0.659	-0.757	0.574	-1.26	0.301	-1.11							-0.631	0.707	-0.46	-0.869	1.54	0.199	-1.28
-1.49	-1.43	1.34	-2.53	0.551	-0.699	0.0556	-0.392							-0.436	-0.326	-0.714	-0.282	1.18	0.567	-1.76
-1.41	-0.876	1.6	-1.7	1.24	-1.13	-0.154	-0.482							-0.316	-0.856	-0.504	-0.246	1.44	-0.472	-2.24
-1.85	-1.39	1.04	-0.914	0.656	-2.14	0.766	-0.5							-0.786	-1.27	-0.242	-0.503	1.02	0.0363	-2.44
-2.01	-2	0.251	-0.854	1.39	-0.925	-1.47	-0.625							-0.0999	-1.07	0.0199	-0.178	0.237	0.112	-1.65
-0.796	-0.709	0.584	-0.784	1.62	-0.933	-1.24	0.00731							0.0137	-0.47	-0.3	-1.23	-0.697	-0.797	-1.8
-0.134	-2.21	0.547	0.61	1.81	-0.403	0.15	-0.676							-0.256	0.0455	0.0006	-0.331	0.168	0.106	-0.945
-0.653	-2.56	1.09	-0.831	2.7	-1.15	0.8	-0.897							-0.921	0.071	0.0371	-0.73	0.723	-0.648	-1.09
-1.67	-2.79	1.4	-1.16	2.06	-1.19	-0.389	-0.642							-2.2	1.34	0.273	-0.515	0.248	0.463	-1.32
-1.23	-2.3	0.183	-1.48	2.41	0.329	-0.34	-0.688							-1.49	-0.283	0.0828	-0.96	-0.281	-0.49	-1.6
-1.22	-2.11	0.0645	-0.719	1.88	-1.83	0.0859	-0.327							0.0377	-1.43	0.643	-0.564	0.00339	-0.107	-2.78
-2.02	-2.6	0.356	0.918	1.99	-1.4	-1.42	-0.461							0.863	-0.518	0.15	-0.671	-0.534	0.129	-1.79
-1.82	-2.69	0.893	-0.00125	2.1	-1.7	-0.422	-0.655							0.499	0.0575	0.142	-0.635	-1.2	-0.48	-3.01
-1.52	-2.08	0.931	-1.01	2.21	-2.95	-0.368	-0.702							-0.828	0.0412	-0.502	-0.611	-0.698	0.437	-2.3
-1.5	-2.18	1.57	-1.19	2.13	-2.85	0.223	-0.856							-0.469	0.88	-0.264	-0.611	-0.74	-0.107	-2.15
-1.23	-2.58	1.58	-1.37	1.47	-2.4	-0.805	-0.604							0.86	0.0278	-0.098	-0.193	-0.551	-0.254	-2.04
-0.899	-2.3	0.981	-1.42	1.53	-0.322	-1.17	-0.448							0.542	-0.415	-0.254	-0.0567	-0.53	0.847	-2.13
-0.631	-1.7	0.974	-0.423	1.23	0.381	-2.24	-0.517							0.913	-0.729	-0.113	-0.753	-0.639	-0.0669	-1.79
-0.821	-2.37	1.51	-0.279	0.809	-0.949	-2.18	-0.639							0.668	-0.737	-0.0952	0.157	-1.46	-1.01	-1.87
-1.35	-2.05	0.768	-1.14	0.471	0.279	-1.98	-0.831							-0.202	0.053	-0.428	-0.121	-0.533	-1.75	-1.88
-1.3	-1.45	0.12	-1.82	0.823	1.19	-1.22	-1.16							-0.976	-0.158	-0.66	-0.551	-1.03	-0.867	-1.94
-1.55	-2.09	0.324	-0.966	0.431	-1.46	-1.12	-1.53							-0.0739	-2.57	-0.467	-0.277	-1.07	-0.184	-1.36
-1.23	-1.99	0.651	-0.969	1.05	-0.362	-2.26	-1.43							-0.176	-1.28	-0.659	-0.479	-1.59	-0.806	-1.64
-1.61	-2.02	0.572	-0.986	0.7	-0.13	-2.39	-1.75							-0.376	-1.5	-0.606	-0.261	-1.37	0.00281	-1.1
-1.95	-2.06	-0.0667	-1.35	0.671	0.374	-2.69	-1.43							-0.675	-0.831	-0.904	-0.215	-1.02	0.319	-0.789
-1.98	-1.77	-0.251	-1.55	1.07	0.71	-2.31	-1.36							-0.327	-0.746	-0.8	-0.148	-0.654	0.0502	-0.921
-1.99	-2.18	0.61	-0.496	1.16	1.42	-2.68	-1.93							-0.613	-1.36	-0.762	-0.732	-0.933	-1.64	-1.46
-2.06	-2.57	0.667	-1.27	1.37	0.697	-1.85	-1.83							-0.905	-2.13	-0.992	-0.335	-0.919	-2.06	-1.4
-2.31	-1.56	-0.0857	-1.46	1.09	0.746	-2.94	-1.69							0.099	-1.63	-0.546	-0.241	-0.327	0.717	-1.06
-2.17	-1.49	0.213	-0.804	0.657	1.6	-1.01	-1.57							-0.171	-0.393	-0.741	0.0851	-0.197	-0.197	-0.955
-2.26	-1.89	0.142	-0.756	0.481	1.19	-1.18	-1.48							-0.632	-0.239	-1.3	0.284	1.08	-0.71	-1.49
-2.35	-1.83	-0.224	-1.74	0.108	-0.307	-2.2	-1.42							-0.404	-1.2	-1.41	-0.0708	0.787	0.358	-1.86
-2.73	-1.57	-0.128	-2.31	0.872	1.21	-2.88	-1.26							-1.46	-1.18	-1.2	-0.235	0.00948	0.129	-1.73
-2.81	-1.38	0.0973	-1.21	0.849	0.813	-1.5	-1.05							-0.554	-1.12	-1.38	-0.123	0.499	0.0248	-2.46
-3.08	-1.1	-0.678	-0.887	0.479	1.25	-2.11	-1.37							0.983	-1.24	-1.39	-0.377	0.208	-0.576	-2.01
-2.81	-1.76	0.437	-0.835	0.992	1.66	-1.62	-1.44							0.858	-1.44	-1.09	-0.146	0.994	-0.294	-2.41
-2.11	-1.52	-0.0593	-1.07	0.999	0.549	-0.681	-1.19							1.08	-1.39	-1.33	-0.504	-0.527	-0.137	-2.55
-2.09	-2.25	-0.368	-1.92	1.36	1.1	-2	-1.53							0.847	-2.02	-0.891	-0.705	-0.267	0.467	-1.24
-2.5	-2.45	-0.299	-0.929	0.345	0.575	-1.85	-1.47							1.12	-0.329	-1.18	-0.227	-0.64	0.43	-0.923
-1.98	-1.51	-0.863	-0.996	0.647	2.21	-2.93	-0.991							0.554	-2.37	-0.631	-0.333	-0.0219	0.267	-0.916
-1.87	-1.9	-0.713	-1.23	0.809	0.562	-2.72	-1.92							0.365	-0.283	-0.821	0.156	0.459	0.722	-2.19
-2.18	-1.86	-0.786	-0.833	0.983	1.83	-0.864	-2.22							-0.126	-2.01	-0.822	0.682	-0.507	0.846	-0.812
-2.21	-2.34	0.0552	-1.04	0.26	2.92	-0.0417	-1.16							-0.353	-1.4	-0.674	-0.377	-0.578	-0.278	-1.5
-2.58	-2.66	-0.268	-1.36	0.526	3.16	0.0132	-1.76							0.0419	-2.26	-1.03	-0.155	-0.991	0.221	-1.5
-2.63	-1.92	-0.853	-1.48	0.552	2.53	-0.903	-1.29							-0.0437	-2.08	-1.58	-0.276	-0.36	0.487	-1.8
-2.94	-2.84	-0.304	-1.73	0.841	3.37	0.148	-1.43							-0.484	-0.588	-1.04	0.321	-0.0432	-0.0621	-0.915
-2.45	-2.34	-0.137	-0.998	0.922	1.47	-0.291	-1.71							-0.194	-1.34	-1.06	-0.0956	-1.08	0.447	-2.03
-2.27	-2.19	-0.128	-1.5	1.32	1.3	-1.06	-2.16							-0.271	0.0992	-0.826	-0.643	-1.1	1.6	-2
-2.58	-2.67	-0.82	-1.56	1.23	1.7	-0.843	-1.99							-0.292	-1.05	-0.698	-0.839	-0.682	0.416	-3.17
-2.29	-2.8	-0.885	-1.79	0.889	0.807	-0.324	-2.03							-1.43	0.358	-0.595	-0.191	-1.24	0.206	-2.06
-2.44	-1.46	-0.75	-1.63	0.692	-0.00822	-1.97	-1.66							-1.02	-1.8	-0.755	-1.27	-1.31	1.53	-0.435
-2.81	-1.52	-0.334	-0.908	0.904	0.415	-2.41	-1.77							-1	-1.54	-1.21	-0.53	-0.606	1.5	0.208
-2.6	-1.97	-0.0358	-1.53	1.25	0.831	-1.95	-0.934							-1.22	-1.14	-0.786	-0.396	-0.955	1.24	0.229
-2.95	-1.92	-0.0654	-1.49	0.535	0.663	-1.21	-1.18							-0.631	-1.51	-0.841	-0.607	-0.984	1.68	-0.123
-2.84	-1.24	-0.705	-1.96	0.905	0.287	-1.67	-1.47							-1.1	-1.29	-0.826	-1.13	-1.37	0.0952	-0.646
-2.91	-1.79	-0.236	-2.07	0.718	-1.63	-0.62	-1.6							-1.39	-2.3	-1.05	-1.33	-1.39	-0.0232	-0.476
-2.5	-0.862	-0.00574	-2.26	0.999	-1.6	-0.174	-1.69							-0.45	-1.88	-0.553	-1.21	-1.35	0.289	-0.535
-2.76	-1.74	-0.687	-1.85	0.862	-0.0394	-0.8	-1.47							-0.473	-1.77	-0.98	-1.13	-1.65	0.0836	0.302
-3.22	-2.16	-1.36	-1.8	0.784	-0.961	-0.576	-1.22							-1.11	-0.108	-1.03	-1.51	-2.24	1.01	-0.517
-2.62	-2.46	-0.934	-1.72	1.71	-1.59	-0.457	-0.919							-1.34	-1.23	-1	-1.44	-1.76	-0.368	-0.534
-2.3	-1.85	-1.36	-1.14	0.859	-2.5	-0.855	-0.983							-1.38	-1.27	-0.795	-1.04	-2.16	0.907	-0.84
-1.86	-2.62	-1.54	-1.03	0.274	-2.87	-1.84	-1.47							-1.31	-1.7	-1.01	-1.05	-1.92	0.785	-1.04
-2.09	-2.81	-1.68	-2.72	0.323	-3.96	-1.65	-1.07							-1.88	-2.36	-0.981	-0.242	-1.92	0.539	-0.999
-2.61	-2.57	-1.04	-2.63	0.357	-4.4	-1.08	-0.849							-1.72	-1.43	-0.791	-1.27	-3.15	-0.285	-1.43
-3.19	-2.82	-1.08	-3.3	0.841	-3.26	-0.413	-0.983							-1.85	-1.67	-0.54	-0.772	-2.93	0.361	-1.03
-3.28	-2.78	-1.24	-3.7	0.238	-2.88	-1.15	-0.441							-1.08	-1.55	-0.608	-1.61	-2.22	1.74	-1.26
-3.19	-1.89	-1.18	-3.42	0.528	-1.43	-0.673	-0.37							-1.41	-1.25	-0.692	-0.345	-3.14	0.227	-2.35
-3.15	-2.63	-1.49	-2.92	0.971	-1.69	-1.67	-0.906							-1.77	-1.6	-0.633	-0.761	-2.41	1.27	-2.09
-2.88	-3.17	-0.679	-2.84	0.405	-2.45	-1.23	-0.942							-1.16	-2.61	-0.377	-0.89	-3.08	0.937	-1.67
-3.5	-2.29	-1.22	-2.75	0.514	-2.03	-0.783	-0.997							-1.99	-1.89	-0.689	-1.31	-2.44	0.313	-0.0104
-3.46	-4.04	-1.28	-2.9	0.645	-1.55	-1.42	-0.735							-1.51	-1.83	-0.331	-1.31	-2.22	0.652	-1.5
-3.56	-2.81	-0.314	-3.15	0.383	-2.58	-1.26	-0.786							-2.11	-1.93	-0.898	-1.26	-1.92	-0.522	-1.64
-3.84	-3.37	-1.21	-3.06	0.337	-1.65	0.092	-0.562							-1.62	-2.18	-0.406	-1.27	-2.11	0.639	-2.18
-3.58	-3.87	-1	-2.91	0.378	-2.11	-0.79	-0.747							-1.51	-0.789	-0.744	-0.915	-2.42	-0.356	-1.42
-3.37	-3.57	-1.76	-3.13	0.615	-2.11	-1	-0.982							-2.14	-1.92	-1.19	-1.27	-2.73	-0.422	-1.05
-3.3	-3.58	-1.84	-2.62	0.73	-1.64	-1.7	-0.942							-2.11	-1.04	-1.22	-1.45	-2.26	-0.464	-1.01
-3.96	-3.22	-1.9	-3.68	-0.124	-3.28	-0.747	-0.988							-2.31	-0.753	-1.5	-1.26	-2.93	-0.27	-2.57
-3.94	-3.3	-1.83	-3.17	-0.0841	-2.38	-0.564	-1.77							-2.4	-1.2	-0.953	-1.62	-2.76	0.93	-2.42
-3.59	-3.14	-2.49	-3.21	-0.448	-1.94	-0.952	-1.66							-2.73	-1.1	-0.934	-1.04	-3.09	1.39	-3.09
-4.15	-3.51	-3.52	-3.41	-0.281	-3.62	-1.63	-1.71							-1.72	-1.39	-0.945	-0.859	-3.21	0.749	-2.78
-4.3	-2.88	-2.24	-2.99	-0.375	-2.58	-1.24	-1.52							-2.43	-2.02	-1.69	-1.71	-2.79	-1.54	-2.28
-4.27	-3.73	-1.64	-2.8	-0.942	-3.19	-1.93	-1.96							-2.18	-1.67	-2.14	-1.15	-3.74	0.1	-2.76
-4.58	-3.76	-1.52	-3.38	-0.287	-3.81	-1.42	-1.8							-1.97	-1.83	-2.06	-1.11	-3.18	-0.328	-3.99
-4.63	-3.39	-1.83	-3.83	-0.183	-3.46	-1.44	-1.68							-2.09	-2.67	-1.6	-0.819	-2.34	0.0951	-3.7
-4.49	-3.15	-1.46	-3.81	-0.51	-3.66	-1.29	-1.92							-2.45	-1.69	-1.62	-1.3	-3.57	0.684	-3.59
-4.31	-2.76	-2.62	-4.38	-0.481	-2.7	-0.991	-2.21							-2.47	-0.556	-1.18	-0.902	-2.4	1.35	-2.3
-4.53	-2.9	-2.19	-3.31	-0.277	-2.93	-1.19	-2.39							-2.56	-0.473	-1.84	-1.27	-2.61	-0.117	-3.11
-4.39	-2.53	-2.92	-3.55	-0.412	-2.17	-3.13	-2							-2.04	-1.54	-2.29	-1.63	-2.8	0.725	-3.41
-4.56	-3.74	-2.26	-3.84	-0.818	-2.45	-2.48	-1.94							-1.95	-1.48	-1.96	-0.789	-2.18	0.177	-3.62
-4.43	-2.68	-2.48	-3.9	-0.264	-2.52	-3.44	-2.46							-1.91	-2.53	-2.02	-1.31	-3	-0.797	-3.61
-4.46	-2.89	-2.66	-3.58	-0.679	-3.52	-1.92	-2.56							-1.45	-1.76	-1.71	-1.31	-3.02	0.0574	-3.25
-4.46	-3.13	-2.27	-3.55	-0.636	-4.69	-2.63	-2.49							-2.51	-1.19	-1.95	-1.35	-2.8	1.26	-2.68
-5.03	-3.72	-2.93	-3.47	-0.426	-3.68	-2.22	-2.73							-2.32	-2.72	-2.09	-1.61	-3.16	0.72	-2.82
-4.6	-3.71	-2.12	-3.82	-0.348	-2.46	-3.02	-2.2							-2.73	-1.87	-2.04	-0.69	-2.75	1.31	-3.7
-4.86	-2.18	-2.4	-3.67	-0.648	-2.06	-2.85	-2.58							-2.15	-1.39	-1.94	-1.07	-2.89	-0.511	-3.25
-4.42	-3.06	-3.52	-4.04	-1.4	-1.88	-2.07	-2.57							-2.55	-1.22	-2.31	-1.22	-3.32	0.246	-2.11
-4.17	-3.11	-3.05	-3.39	-1.16	-3.52	-2.17	-2.72							-2.56	-1.56	-2.2	-1.46	-2.92	-0.589	-3.27
-4.36	-3.55	-2.1	-3.65	-1.61	-2.13	-2.07	-3.04							-2.58	-2.45	-2.2	-1.17	-3.54	-0.486	-3.54
-4.53	-3.52	-3.38	-4.35	-1.68	-1.74	-2.33	-2.72							-2.83	-1.49	-1.88	-1.69	-2.85	0.364	-3.55
-4.49	-3.51	-2.89	-4.08	-0.757	-0.994	-3.1	-2.67							-2.4	-1.22	-2.08	-1.33	-3.44	-0.734	-4.58
-4.19	-3.66	-2.45	-3.71	-0.592	-2.31	-3.96	-2.6							-2.52	-0.151	-2.16	-1.57	-3.11	0.398	-3.53
-3.92	-2.84	-3.07	-3.57	-1.33	-2.89	-4.01	-2.98							-3.09	-1.66	-1.92	-0.866	-3.47	-0.345	-3.24
-3.94	-2.92	-2.93	-3.54	-1.52	-2.87	-3.03	-2.07							-2.62	-1.73	-1.84	-0.748	-3.73	-0.628	-3.08
-4.17	-2.93	-2.45	-4.63	-0.843	-1.96	-2.99	-2.71							-2.98	-2.11	-2.26	-2.15	-2.3	-1.22	-2.8
-4.12	-3.15	-3.15	-4.01	-1.31	-2.43	-2.54	-2.51							-2.4	-1.3	-1.75	-0.822	-2.49	-1.55	-2.84
-4.01	-4.12	-2.86	-3.61	-1.58	-1.47	-2.6	-3.07							-3.06	-1.96	-2.26	-1.53	-1.72	-0.805	-3.24
-3.98	-3.54	-2.85	-4.1	-1.21	-2.99	-3.81	-2.99							-2.82	-1.34	-2.79	-1.22	-1.66	0.114	-3.69
-4	-3.79	-3.29	-4.51	-1.76	-3.67	-3.45	-3.02							-2.75	-1.41	-2.76	-1.45	-2.55	-1.27	-3.67
-3.63	-4.55	-2.94	-3.48	-1.48	-4.5	-3.22	-2.81							-2.97	-0.194	-2.31	-1.24	-3.03	-0.379	-4.34
-3.78	-3.56	-2.65	-3.94	-1.31	-3.2	-3.3	-2.7							-1.89	-1.83	-2.19	-1.37	-3.38	-1.31	-4.25
-3.67	-3.88	-2.38	-3.81	-0.758	-3.61	-3.73	-2.71							-2.02	-1.69	-2.43	-0.976	-2.53	-0.936	-4.13
-3.61	-3.64	-1.99	-4.27	-1.7	-2.91	-3.62	-2.56							-2.47	-1.38	-2.56	-1.29	-2.83	0.891	-3.79
-3.75	-3.97	-2.51	-4.05	-1.44	-3.36	-3.11	-2.67							-2.67	-0.653	-2.48	-1.27	-2.75	-0.948	-4.8
-3.85	-3.92	-3.1	-4.27	-1.65	-4.37	-2.51	-2.89							-2.86	-0.127	-2.24	-0.843	-3.21	-0.709	-4.13
-4.04	-2.57	-3.51	-3.8	-2.29	-3.47	-3.44	-2.97							-2.68	-1.77	-2.09	-1.26	-3.01	-1.52	-3.87
-4.25	-4.77	-2.92	-3.95	-1.21	-3.99	-3.39	-2.97							-3.01	-1.47	-2.41	-1.14	-3.57	0.685	-4.23
-4.02	-3.6	-2.8	-4.13	-1.26	-3.82	-4.24	-2.19							-3.19	-0.393	-2.2	-0.661	-3.44	-0.131	-3.45
-3.46	-3.31	-3.45	-4.13	-1.45	-3.61	-3.9	-2.82							-2.95	-1.45	-1.94	-1.21	-3.45	0.573	-3.42
-2.83	-3.45	-2.91	-3.57	-1.63	-3.83	-4.19	-3							-2.4	-0.86	-1.66	-1.1	-3.19	0.0148	-3.45
-2.85	-4.47	-3.12	-3.65	-2.72	-3.78	-3.38	-3.06							-2.36	-1.15	-1.78	-1.06	-3.08	-1.42	-3.13
-2.87	-3.29	-2.99	-3.24	-1.88	-5.4	-3.5	-3.02							-3.1	-1.45	-2.08	-1.48	-2.49	-0.0355	-3.37
-3.58	-3.36	-2.77	-3.48	-1.6	-3.76	-3.29	-2.83							-2.5	-0.844	-1.79	-1.29	-3.36	-0.586	-3.2
-3.42	-3.98	-2.93	-4.03	-1.61	-4.42	-3.66	-2.7							-2.65	-0.541	-2.05	-1.79	-3.91	-0.282	-3.15
-3.68	-3.81	-2.37	-3.63	-2.19	-4.29	-2.96	-3.18							-2.91	-1.46	-1.83	-1.72	-2.89	0.0357	-3.92
-3.7	-4.52	-2.76	-3.44	-1.73	-5.3	-3.57	-3.22							-3.01	-0.165	-2.09	-0.736	-3.16	-1.71	-3.2
-3.83	-3.61	-3.43	-3.65	-1.68	-5.62	-3.73	-3.5							-2.99	-0.767	-1.96	-1.29	-2.58	-0.454	-3.13
-3.48	-4.88	-1.86	-3.63	-1.85	-4.55	-3.76	-3.46							-3.32	-1.31	-1.94	-1.39	-3.07	-0.857	-3.15
-3.56	-4.48	-2.41	-3.24	-1.43	-4.7	-4.05	-3.46							-2.78	-1.1	-1.74	-1.37	-2.96	1.1	-3.53
-3.56	-4.32	-3.11	-3.6	-1.34	-4.98	-3.62	-3.68							-3.57	-0.0656	-1.74	-0.826	-3.24	0.689	-3.87
-3.46	-4.05	-3.31	-3.22	-1.67	-4.05	-3.55	-3.48							-2.92	-0.813	-1.38	-0.63	-4.06	-0.176	-4.1
-3.64	-3.22	-3.65	-3.27	-1.97	-4.43	-3.67	-3.8							-2.37	-1.48	-1.37	-0.343	-3.16	-0.863	-3.02
-3.47	-3.38	-3.26	-3.34	-1.84	-3.84	-4.35	-3.29							-2.06	-1.04	-1.49	-1.18	-3.62	-0.403	-3.59
-3.82	-4.29	-3.1	-3.77	-1.72	-4.03	-3.98	-3.18							-2.06	-0.552	-1.5	-0.746	-3.3	0.444	-3.89
-3.37	-3.64	-3.03	-3.47	-1.19	-3.26	-3.84	-4.07							-2.69	-1.95	-1.53	-0.603	-3.71	-1.24	-4.89
-3.63	-3.54	-3.39	-4.32	-1.46	-3.99	-3.85	-3.8							-2.76	-0.621	-2.14	-0.675	-2.77	-1.42	-4.12
-3.27	-4.21	-3.13	-3.6	-1.81	-4.74	-3.97	-3.52							-2.86	-0.857	-2.09	-0.746	-2.38	-0.0708	-4.04
-4.05	-4.18	-3.83	-3.92	-1.52	-4.83	-4.33	-3.71							-2.72	-1.48	-2.47	-1.44	-3.22	-1.13	-4.07
-4.14	-4.56	-3.63	-4.62	-1.69	-5.83	-3.9	-3.75							-2.28	-1.97	-2.34	-1.92	-3.65	-0.599	-5.18
-3.98	-4.43	-3.15	-4.39	-1.61	-3.83	-3.47	-3.67							-2.62	-1.04	-2.23	-1.5	-3.54	-0.235	-4.98
-4.28	-4.4	-3.98	-3.14	-1.89	-4.1	-3.19	-3.57							-2.74	-1.21	-2.14	-1.32	-2.76	0.045	-4.73
-4.12	-3.63	-2.8	-4.37	-1.39	-4.51	-4.48	-3.41							-2.3	-0.901	-2.07	-1.36	-2.52	-0.0251	-4.85
-4.5	-4.07	-3.17	-3.64	-1.39	-4.58	-4.01	-3.5							-2.7	-0.967	-2.65	-0.95	-2.49	-0.0615	-4.42
-4.3	-3.71	-4.3	-3.18	-0.871	-5.41	-4.54	-3.9							-2.16	0.111	-2.41	-1.78	-3.72	-0.253	-3.76
-4.41	-4.03	-3.36	-3.04	-1.83	-4.92	-3.61	-3.8							-3.87	-0.321	-2.08	-1.02	-2.58	0.557	-4.56
-4.64	-2.97	-4.28	-3.1	-2.29	-5.18	-3.71	-3.91							-2.34	-1.17	-2.22	-1.19	-2.81	0.944	-4.83
-4.83	-4.13	-3.61	-3.62	-2.09	-5.79	-3.9	-3.73							-2.94	-1.25	-2.02	-1.4	-2.83	-0.643	-4.78
-5.04	-3.02	-4.15	-3.49	-2.01	-5.87	-3.73	-3.86							-2.95	-1.17	-2.31	-1.26	-2.69	-1.44	-4.95
-4.95	-4.08	-3.51	-3.48	-2.27	-4.67	-3.79	-3.72							-2.07	-1.8	-2.64	-0.83	-2.18	-0.741	-2.12
-5.26	-2.45	-2.63	-3.33	-1.38	-6.1	-4.26	-3.71							-3.28	-0.482	-2.49	-1.45	-3.23	-0.778	-0.779
-4.56	-3.39	-3.56	-3.33	-2.11	-6.09	-3.56	-3.86							-2.85	-1.31	-2.42	-1.44	-2.28	-0.317	-0.742
-5.01	-4.37	-3.29	-4.17	-1.44	-4.9	-4.04	-3.74							-3.18	-3.31	-2.37	-0.965	-3.28	-0.313	-1.1
-5.05	-4.71	-3.37	-3.29	-1.45	-6.21	-3.56	-3.45							-3.51	-1.75	-2.64	-1.29	-2.98	-0.401	-1.09
-4.76	-3.16	-3.52	-3.99	-2.09	-5.11	-3.53	-3.78							-3.18	-1.27	-2.74	-1.25	-3.14	-1.01	-1.26
-5.03	-4.12	-3.28	-3.27	-1.41	-4.69	-3.95	-3.99							-3.3	-1.63	-2.81	-1.81	-3.31	0.208	-1.3
-5.18	-3.15	-3.33	-4.05	-2.21	-6.13	-3.9	-3.3							-3.14	-1.47	-2.57	-1.06	-3.13	-0.581	-2.38
-5.33	-3.59	-3.55	-3.57	-2.67	-5.7	-3.61	-3.81							-3.21	-1.69	-2.69	-1.17	-3.46	-0.935	-1.51
-5.76	-3.03	-3.96	-4.32	-2.09	-4.14	-4.59	-4							-3.24	-1.1	-2.69	-1.07	-2.98	0.16	-2.16
-5.72	-2.81	-3.73	-4.02	-1.25	-6.05	-3.54	-3.55							-3.8	-1.26	-2.45	-1.09	-4.06	0.173	-2.27
-5.85	-3.23	-4.04	-3.91	-1.43	-5.94	-4.36	-4.27							-4.08	-2.22	-2.1	-1.59	-2.7	0.75	-2.01
-6.16	-4.95	-3.96	-3.69	-2.07	-6.36	-4.56	-4.16							-3.68	-2.54	-2.27	-1.7	-2.81	1.21	-2.68
-5.9	-3.86	-4.17	-4.52	-1.33	-5.73	-4.85	-3.72							-3.6	-2.42	-2.26	-1.66	-3.24	0.513	-3.46
-5.78	-4.29	-4.25	-4.06	-1.96	-6.15	-3.88	-4.02							-4.32	-2.53	-2.82	-1.49	-2.74	-1.17	-2.79
-6.2	-5.26	-3.88	-4.49	-1.74	-6.44	-4	-3.56							-3.53	-1.54	-2.42	-1.52	-2.74	-0.0472	-3.35
-6.16	-4.33	-4.08	-4.65	-2.04	-6.27	-3.8	-4.15							-4.36	-3.13	-1.84	-1.27	-2.37	-0.9	-2.82
-6.36	-4.63	-3.13	-3.96	-2.24	-5.51	-4.15	-3.73							-3.78	-1.97	-0.991	-1.77	-2.8	-0.729	-3.84
-6.36	-2.67	-3.46	-4.4	-1.97	-6.11	-4.32	-3.59							-3.54	-1.94	-1.14	-1.6	-2.36	0.208	-3.91
-6.03	-3.96	-3.66	-4.09	-1.44	-6.3	-3.77	-3.59							-4.11	-1.88	-0.938	-1.61	-3.04	-0.136	-3.86
-6.49	-4.23	-4.53	-3.68	-2.48	-6.39	-4.61	-3.96							-3.63	-0.789	-1.4	-2.09	-2.23	-0.436	-3.25
-6.33	-3.82	-3.87	-4.31	-1.83	-6.28	-3.12	-3.88							-3.71	-2.08	-1.19	-1.48	-2.84	-0.863	-3.26
-6.39	-3.87	-3.74	-3.97	-2.41	-6.16	-4.68	-3.78							-3.97	-2.66	-1.7	-1.64	-3.18	-0.84	-4.27
-6.4	-3.71	-2.97	-4.46	-2.4	-6.13	-4.8	-3.83							-3.26	-2.96	-1.51	-2.56	-3.23	-0.296	-3.98
-6.16	-3.91	-3.52	-4.33	-2.14	-6.74	-4.8	-4.1							-4.1	-1.69	-1.64	-1.66	-3.82	-0.614	-3.98
-6.2	-3.27	-3.41	-4.6	-2.59	-6.45	-4.67	-4.03							-3.56	-0.97	-1.71	-1.73	-3.37	-1.64	-3.99
-6.27	-4.06	-3.75	-5.07	-2.82	-6.71	-4.26	-3.5							-3.62	-2.42	-1.53	-1.44	-3.21	0.201	-3.28
-6.24	-3.77	-3.21	-4.41	-2.54	-7.3	-4.3	-3.27							-3.16	-3.04	-1.99	-1.92	-3.59	-0.876	-4
-5.9	-3.39	-3.76	-4.39	-3.02	-7.22	-3.98	-2.45							-3.67	-1.72	-1.77	-1.86	-2.34	-0.828	-2.74
-5.59	-3.69	-3.9	-4.3	-2.04	-7.88	-4.3	-2.75							-3.71	-0.859	-2.11	-1.98	-2.69	-0.0821	-3.26
-5.71	-4.38	-4.19	-4.76	-2.87	-6.4	-4.75	-3.36							-2.76	-0.72	-2.03	-1.02	-3.49	0.504	-2.55
-5.92	-3.88	-3.88	-4.99	-3.13	-7.97	-5.12	-3.27							-3.91	-2.38	-1.84	-1.64	-2.6	-0.811	-4.53
-5.81	-3.96	-4.45	-5	-2.69	-5.83	-4.55	-3.31							-3.01	-1.86	-1.77	-1.7	-3.56	-0.492	-3.6
-6.46	-3.54	-4.13	-4.8	-2.25	-7.03	-4.33	-3.33							-3.31	-1.58	-1.8	-1.24	-3.26	0.329	-4.79
-6.11	-4.07	-3.82	-3.98	-2.12	-6.19	-4.32	-3.18							-3.78	-2.33	-2.08	-1.64	-3.64	-0.404	-4.26
-6.37	-3.34	-5.02	-4.08	-2.32	-6.61	-3.9	-3.74							-3.24	-1.1	-1.76	-1.27	-3.95	-0.526	-3.45
-6.17	-3.55	-4.39	-4.27	-2.06	-7.31	-3.95	-3.73							-3.28	-1.02	-2.21	-1.24	-3.53	-1.12	-4.17
-6.23	-3.14	-4.68	-4.41	-2.8	-6.94	-3.93	-3.74							-3.17	-1.85	-2.08	-1.58	-3.19	-0.562	-3.67
-6.33	-3.46	-4.19	-4.85	-2.87	-7.18	-5.08	-3.57							-3.54	-2.5	-2.08	-1.09	-2.67	-1.03	-4.28
-6.39	-3.42	-4.18	-4.59	-2.25	-7.29	-4.66	-4.05							-3.9	-2.46	-2.37	-1.45	-2.83	-2.86	-3.05
-6	-3.57	-4.07	-3.97	-2.6	-7.4	-4.62	-3.88							-3.65	-1.99	-2.54	-1.28	-3.31	-0.788	-4.19
-6.27	-3.57	-3.35	-4.75	-2.93	-7.4	-4.56	-4.04							-3.56	-2.36	-2.61	-1.53	-3.35	-0.792	-4.31
-6.33	-3.14	-3.4	-4.21	-2.87	-5.94	-5.29	-3.97							-3.24	-2.58	-2.61	-1.71	-2.96	-0.634	-3.53
-6.05	-2.98	-3.46	-4.18	-2.96	-7.6	-4.19	-3.92							-4.16	-2.23	-2.26	-1.8	-3.35	-0.899	-5.22
-6.02	-3.05	-4.38	-4.47	-2.67	-6.66	-4.64	-3.75							-3.66	-2.87	-2.41	-1.25	-3.9	1	-3.62
-6.18	-4.35	-3.73	-4.05	-2.79	-8.74	-5.37	-3.66							-3.05	-2.13	-2.17	-1.07	-2.87	-0.17	-3.34
-6.09	-3.54	-4.71	-5.07	-2.81	-7.99	-4.68	-3.45							-2.97	-1.79	-2.43	-1.51	-2.91	-0.184	-1.94
-6.45	-4.26	-4.63	-4.17	-3.57	-7.67	-5.36	-3.9							-2.74	-2.13	-2.23	-1.92	-3.8	-0.803	-3.88
-6.54	-3.49	-3.86	-4.25	-3.16	-7.84	-4.49	-4.06							-3.04	-2.08	-1.68	-2.38	-3.44	-1.89	-3.44
-6.42	-2.63	-3.92	-4.55	-4.26	-7.56	-4.79	-3.81							-3.01	-2.02	-1.77	-1.45	-3.89	-1.32	-3.79
-6.57	-3.47	-3.8	-3.77	-3.49	-7.7	-4.66	-3.89							-3.65	-2.01	-1.99	-2.12	-3.51	-1.11	-3.45
-6.87	-3.06	-3.9	-4.35	-3.41	-6.42	-5.29	-3.75							-3.31	-2.26	-1.74	-1.88	-3.44	-0.0309	-3.76
-6.77	-4.07	-4.29	-4.69	-3.17	-6.71	-5.03	-4.21							-4.28	-1.81	-1.81	-2.05	-3.5	-0.528	-3.6
-6.42	-3.38	-3.53	-5.1	-3.2	-7.24	-4.08	-4.57							-4.45	-2.16	-2.1	-1.55	-3.14	-0.468	-4.26
-6.45	-3.18	-4.46	-4.34	-3.11	-7.56	-3.3	-4.18							-3.68	-1.52	-1.7	-1.44	-4.03	-1.28	-3.32
-6.37	-2.39	-4.31	-4.84	-2.75	-6.19	-5.22	-3.79							-4	-2.84	-2.08	-1.76	-3.94	0.316	-3.75
-6.15	-2.1	-4.83	-4.01	-3.24	-7.09	-5.09	-4.25							-3.95	-1.2	-1.9	-1.92	-3.7	-1.04	-3.87
-6.38	-3.16	-4.48	-3.86	-3.41	-8.37	-5.39	-3.92							-3.38	-1.83	-2	-1.63	-2.79	0.113	-3.77
-6.69	-2.81	-4.14	-3.97	-3.41	-6.57	-5.13	-3.67							-3.19	-2.11	-2.03	-1.2	-1.86	-1.17	-4.34
-6.65	-2.98	-4.72	-4.38	-3.85	-7.7	-5.37	-3.71							-3.47	-1.42	-2.2	-1.55	-2.94	-1.22	-3.62
-6.91	-4.22	-4.21	-4.42	-2.98	-6.7	-6	-3.8							-3.64	-1.94	-2.16	-1.43	-2.19	-0.369	-4.08
-6.91	-3.53	-4.74	-3.87	-2.79	-7.23	-4.88	-4.12							-3.89	-1.21	-2.2	-1.54	-3.38	0.13	-5.41
-6.93	-2.63	-4.17	-4.11	-3	-7.45	-5.44	-4.1							-3.75	-2.05	-2.4	-1.55	-3.24	-0.304	-3.76
-7.04	-3.41	-4.62	-3.97	-3.21	-7.97	-5.06	-4.03							-3.7	-1.74	-2.18	-1.86	-2.09	0.279	-4.26
-7.02	-2.91	-3.74	-4.72	-2.31	-7.5	-4.95	-4.03							-3.98	-3.34	-2.24	-1.66	-3.18	-0.936	-4.27
-6.93	-3.07	-5.17	-4.09	-1.73	-7.8	-4.83	-4.01							-4.36	-1.87	-2.38	-0.935	-2.59	-0.249	-5.45
-6.87	-3.3	-4.91	-4.78	-1.9	-8.34	-5.14	-4.05							-4.1	-3	-2.01	-2.22	-2.71	-0.788	-4.25
-6.81	-2.69	-4.72	-4.23	-1.69	-8.17	-4.08	-4.11							-3.93	-3.49	-2.24	-2.27	-2.95	-0.0708	-4.65
-7.03	-2.9	-4.59	-4.22	-1.92	-8.02	-5.26	-3.87							-3.9	-3.44	-2.22	-1.96	-2.41	-0.625	-4.91
-7.4	-2.74	-4.49	-4.44	-1.87	-7.65	-4.39	-3.93							-4.41	-3.07	-2.35	-1.64	-3.03	-0.319	-4.1
-7.22	-2.21	-4.29	-3.82	-2.25	-7.8	-3.99	-3.59							-4.06	-3.03	-2.84	-1.37	-3.1	-0.393	-4.4
-7.16	-2.84	-4.51	-3.21	-1.16	-8.03	-4.14	-4.01							-4.63	-2.58	-2.37	-1.64	-3.51	-1.41	-4.89
-7.46	-1.38	-4.62	-3.67	-1.92	-7.45	-4.9	-3.74							-3.57	-4.07	-2.45	-1.75	-2.99	-1.37	-4.26
-6.93	-2.63	-5.26	-3.29	-2.65	-7.65	-6.01	-3.83							-4.17	-1.64	-2.46	-1.69	-3.66	0.538	-4.73
-7.12	-1.89	-4.5	-4.45	-2.16	-8.88	-5.64	-3.76							-3.96	-2.24	-2.74	-1.75	-2.5	-0.646	-4.37
-7.19	-2.41	-4.87	-4	-2.51	-8.9	-4.07	-3.26							-3.38	-2.63	-2.37	-1.46	-2.89	-1.56	-5.5
-7.28	-2.54	-4.76	-4.51	-2.52	-8.33	-4.64	-3.49							-3.89	-2.96	-2.6	-1.88	-3.65	-1.16	-4.16
-7.02	-2.72	-4.23	-4.84	-3.26	-8.01	-5.82	-3.31							-3.35	-2.85	-2.56	-2.26	-3.5	-0.963	-5.62
-6.74	-1.52	-4.36	-4.29	-3.08	-8.27	-3.96	-3.94							-3.94	-2.53	-2.41	-1.62	-3.55	-1.55	-4.47
-6.23	-2.34	-4.04	-3.86	-2.27	-8.21	-5.61	-3.42							-3.34	-2.04	-2.28	-2.17	-3.79	-0.755	-4.82
-7.01	-3.16	-3.68	-4.41	-1.2	-8.06	-4.61	-3.58							-3.09	-2.46	-2.41	-1.77	-3.19	-1.22	-3.78
-6.85	-2.82	-3.81	-4.2	-1.62	-7.87	-5.07	-3.46							-4.27	-2.57	-2.51	-1.48	-3.63	0.591	-4.48
-6.9	-4.41	-3.99	-4.75	-1.95	-8.75	-4	-3.28							-4.23	-2.67	-2.39	-2.1	-2.72	-2.4	-3.99
-7.08	-3.64	-3.44	-4.77	-2.18	-8.16	-4.8	-3.14							-3.83	-2.95	-2.49	-2.11	-4.04	-0.46	-4.79
-6.52	-3.82	-3.19	-5.02	-2.1	-7.91	-4.8	-3.08							-3.26	-2.57	-2.18	-2.6	-3.56	0.0886	-4.75
-6.39	-3.23	-3.52	-4.41	-1.34	-7.3	-4.82	-2.85							-3.61	-3.15	-2.8	-1.92	-3.66	0.179	-4.76
-6.63	-3.84	-3.68	-4.4	-2.7	-7.8	-4.72	-3.62							-3.51	-2.18	-2.79	-1.95	-4.08	-0.374	-3.8
-6.08	-3.23	-3.84	-5.49	-2.86	-7.25	-5.02	-3.19							-3.07	-3.24	-2.89	-2.32	-3.94	-0.449	-5
-6.25	-3.61	-3.75	-4.97	-0.993	-7.56	-5.26	-3.12							-3.41	-3.14	-2.78	-2.22	-3.66	-0.538	-4.98
-6.45	-3.98	-4.58	-5.27	-1.05	-7.89	-5.34	-2.99							-3.52	-2.5	-2.8	-2.8	-2.39	0.0435	-5.11
-5.99	-4.07	-4.07	-4.67	-1.28	-7.29	-5.78	-2.39							-3.12	-2.85	-2.45	-1.61	-2.59	0.0256	-4.79
-5.98	-3.38	-4.23	-4.55	-1.81	-7.37	-5.35	-2.99							-3.47	-3.09	-2.22	-2.2	-3.57	-0.681	-4.03
-5.94	-4.25	-3.61	-4.98	-1.53	-8.76	-5.57	-2.74							-3.62	-1.65	-2.07	-2.11	-3.39	-0.168	-3.25
-6.19	-3.29	-3.8	-5.22	-1.11	-8.66	-5.15	-2.15							-4.08	-2.18	-2.9	-2.28	-3.68	-0.00411	-2.64
-6.44	-3.36	-3.86	-5.05	-0.636	-8.21	-5.43	-2.58							-4.25	-2.31	-2.47	-2.19	-3.63	-0.452	-2.71
-6.64	-4.76	-4.3	-5.27	-0.455	-8.29	-5.51	-2.97							-3.48	-1.8	-2.47	-1.75	-3.3	-0.44	-2.74
-6.69	-4.41	-3.71	-4.73	-1.81	-7.32	-5.91	-2.64							-5.01	-1.87	-2.22	-2.49	-2.75	-1.11	-3.49
-6.38	-3.7	-3	-3.94	-2.59	-7.96	-5.98	-2.37							-4.74	-2.39	-2.82	-2.31	-2.61	-1.59	-2.7
-6.49	-3.33	-3.16	-4.31	-1.72	-7.46	-5.56	-2.1							-4.41	-2.6	-2.8	-2.16	-2.75	-0.733	-3.31
-6.7	-3.34	-3.57	-4.69	-1.67	-7.52	-6.01	-2.58							-3.68	-2.15	-3.07	-1.98	-2.39	0.004	-3.48
-6.52	-4.14	-4.13	-4.16	-0.728	-8.88	-4.43	-2.22							-4.76	-0.671	-2.89	-1.98	-2.95	-0.937	-2.65
-6.42	-2.86	-3.42	-4.29	-0.792	-8.85	-5.86	-1.99							-4.39	-2.66	-3.15	-1.95	-2.76	-0.788	-3.34
-6.75	-3.66	-3.3	-4.35	-1.53	-8.84	-5.19	-2.66							-4.03	-1.66	-3.13	-1.43	-3.2	-1.14	-2.17
-6.74	-3.6	-3.56	-4.37	-1.41	-8.86	-5.29	-2.52							-3.77	-3.49	-2.78	-2.2	-3.18	-1.49	-2.48
-6.65	-2.82	-4.32	-5.35	-0.611	-8.4	-4.9	-2.6							-4.36	-3.72	-2.92	-1.45	-3.74	-1.13	-2.88
-6.81	-3.52	-3.7	-3.38	-2.04	-8.34	-5.16	-2.89							-3.87	-1.35	-2.74	-2.05	-2.78	-1.63	-2.22
-6.62	-3.43	-4.68	-4.51	-1.7	-7.94	-5.79	-3.08							-4.39	-2.53	-2.81	-1.85	-3.23	-0.985	-3.55
-6.53	-3.35	-4.29	-4.67	-1.18	-7.72	-6.04	-3.04							-3.8	-1.69	-2.71	-2.41	-3.11	0.0815	-3.38
-6.53	-2.27	-3.87	-5.23	-0.483	-8.3	-5.32	-3.45							-4.29	-2.8	-3.11	-1.99	-3.27	0.135	-2.37
-6.68	-2.81	-3.97	-4.62	-1.17	-8.12	-4.97	-3.69							-3.98	-2.67	-2.89	-1.64	-2.42	0.315	-2.47
-6.79	-3.07	-4.47	-4.25	-1.41	-7.62	-5.84	-3.78							-4.39	-3.74	-2.36	-1.62	-2.21	-0.25	-3.23
-6.87	-3.48	-4.12	-4.32	-1.12	-8.09	-5	-3.27							-3.69	-3.5	-2.16	-2.09	-1.74	0.294	-3.52
-6.67	-3.35	-4.09	-4.44	-0.349	-7.4	-5.71	-3.51							-4.79	-3.4	-2.9	-1.18	-1.93	0.703	-3.91
-6.9	-3.8	-4.3	-4.08	-0.568	-8.63	-4.9	-3.5							-4.26	-3.18	-2.77	-1.61	-2.68	-0.148	-2.23
-6.68	-4.07	-4.47	-4.58	-1.73	-7.9	-4.46	-3.75							-3.03	-2.72	-3.02	-1.55	-2.53	-0.262	-2.42
-6.91	-3.73	-4.15	-4.03	-1.54	-7.47	-4.29	-3.27							-4.3	-3.36	-2.95	-2.16	-2.47	-1.83	-3.19
-7.15	-2.87	-4.86	-3.9	-1.01	-8.71	-5.42	-3.17							-3.56	-3.43	-2.86	-1.63	-2.18	-1.2	-3.34
-6.91	-3.17	-4.84	-4.9	-0.215	-8.21	-4.44	-3.37							-3.73	-2.63	-3.07	-1.79	-2.83	-0.822	-2.8
-6.87	-2.54	-5.11	-3.88	0.0101	-7.72	-5.45	-3.18							-3.75	-3.28	-2.63	-1.4	-2.92	-0.966	-2.69
-6.54	-2.42	-4.64	-4.6	-0.446	-8.42	-4.84	-2.8							-3.9	-2.27	-2.5	-0.92	-2.85	-1.71	-2.45
-6.39	-2.93	-4.82	-4.06	-0.912	-7.77	-5.97	-3.48							-4.34	-2.71	-2.58	-0.954	-2.49	-0.859	-1.72
-6.73	-3.03	-5.02	-4.29	-1.86	-7.89	-6.03	-3.09							-4.32	-2.78	-3.16	-1.79	-3.16	-1.18	-3.22
-7	-3.33	-4.46	-3.95	-0.912	-7.66	-5.37	-3.42							-3.82	-2.73	-2.92	-1.91	-3.34	-1	-2.62
-7.09	-2.8	-4.41	-4.61	-1.95	-8.26	-4.72	-3.53							-3.48	-2.09	-3.05	-1.89	-2.8	-1.53	-3.48
-6.98	-2.97	-3.67	-4.26	-2.28	-8.86	-4.77	-3.89							-3.23	-2.88	-2.88	-2.4	-3.94	-1.39	-3.31
-6.55	-4.09	-4.12	-3.9	-2.78	-8.58	-4.97	-3.84							-3.88	-3.42	-2.86	-2.3	-3.57	-0.895	-3.42
-6.53	-1.65	-3.97	-3.9	-1.93	-8.03	-4.31	-3.5							-4.34	-3.29	-2.69	-2.03	-3.13	0.146	-3.26
-6.85	-3.44	-4.42	-3.6	-2.92	-8.1	-5.04	-3.73							-4.14	-2.89	-2.89	-1.56	-4.8	0.483	-3.29
-6.79	-2.89	-4.15	-3.93	-2.62	-7.66	-5.15	-3.57							-4.55	-1.74	-3.42	-2.53	-3.9	-1.95	-4.01
-6.69	-4.15	-3.95	-3.65	-2.74	-8.22	-5.2	-4.11							-4.04	-4.06	-3.38	-1.61	-3.96	-0.796	-4.37
-6.87	-4.54	-4.72	-3.73	-1.91	-8.28	-5.48	-3.69							-4.02	-3.33	-2.83	-2.13	-2.95	-2.25	-3.54
-6.63	-4.31	-4.58	-4.17	-1.6	-8.54	-3.95	-3.52							-4.05	-3.19	-2.44	-1.79	-4.19	-0.611	-4.74
-7.23	-4.11	-4.69	-3.76	-1.24	-7.32	-4.53	-3.55							-3.85	-3.96	-2.72	-1.9	-4.36	-0.0335	-4.74
-6.56	-3.84	-4.49	-4.46	-1.59	-7.02	-5.79	-3.72							-3.85	-4.05	-2.89	-2.24	-3.12	-0.0157	-4.2
-6.53	-4.42	-5.09	-3.92	-1.92	-7.4	-4.74	-3.27							-4.38	-2.6	-2.94	-2.29	-2.68	-1.13	-4.59
-6.31	-4.23	-4.5	-3.98	-1.46	-8.96	-5.78	-3.96							-3.33	-2.91	-3.2	-2.53	-2.35	-0.786	-3.61
-6.09	-4.22	-4.69	-3.23	-2.11	-9.13	-5.85	-3.52							-2.75	-3.15	-3.49	-1.93	-2.58	-1.11	-4.39
-6.56	-3.14	-4.58	-3.93	-1.81	-8.24	-5.84	-3.06							-3.67	-3.5	-2.92	-2.44	-3.12	0.389	-4.71
-5.99	-3.27	-4.4	-3.44	-1.31	-7.91	-5.39	-3.43							-3.63	-3.43	-2.83	-2.36	-3.21	-0.777	-4.02
-6.32	-4.6	-4.75	-3.71	-1.35	-8.45	-5.01	-3.3							-4	-3.45	-2.49	-2.13	-3.33	-1.24	-2.8
-5.99	-3.61	-4.74	-4.1	-0.825	-8.21	-4.49	-3.43							-4.33	-3.45	-2.65	-1.76	-3	-0.0544	-3.76
-6.07	-4	-5.08	-4.37	-1.25	-7.59	-5.61	-3							-3.9	-2.79	-2.77	-2.3	-3.27	0.585	-4.06
-5.79	-4.51	-4.56	-4.93	-1.11	-8.08	-5.02	-3.69							-4.09	-3.81	-2.7	-1.96	-3.68	1.57	-4.2
-5.62	-4.35	-4.32	-3.91	-0.739	-8.45	-4.56	-3.34							-3.89	-4.66	-3.06	-2.39	-3.18	-0.557	-3.82
-5.94	-2.92	-4.82	-3.51	-1.25	-8.76	-4.94	-3.18							-2.55	-4.85	-2.95	-1.99	-3.35	1.35	-2.66
-6.07	-3.79	-4.56	-3.27	-2	-8.47	-5.54	-3.16							-2.16	-4.03	-3.24	-1.89	-3.13	0.23	-2.57
-5.93	-3.26	-4.71	-3.83	-1.5	-9.02	-5.57	-3.03							-2.36	-3.19	-2.98	-2.3	-2.79	0.793	-3.34
-5.93	-3.38	-5	-3.67	-1.32	-9.36	-4.84	-3.77							-2.28	-4.66	-3.36	-1.36	-4.17	-0.0977	-2.52
-5.89	-3.87	-4.4	-4.08	-1.66	-8.9	-4.75	-3.85							-2.77	-4.06	-2.93	-1.97	-3.94	-0.18	-2.82
-6.06	-3.5	-4.47	-4.27	-1.16	-7.63	-5.48	-3.59							-2.5	-3.78	-2.98	-1.72	-4.09	-0.673	-3.59
-5.63	-3.8	-5.22	-4.79	-0.715	-8.16	-5.89	-3.85							-2.92	-2.73	-2.74	-1.79	-4.54	-0.902	-3
-5.97	-2.3	-4.83	-4.26	-1.43	-8.33	-5.29	-3.22							-2.97	-3.34	-2.27	-2.21	-4.3	-0.809	-2.74
-5.96	-3.31	-4.95	-4.65	-0.721	-7.67	-5.76	-3.16							-3.77	-2.45	-3.23	-2.21	-3.91	-2.2	-3.57
-5.63	-4.56	-4.9	-4.08	-0.685	-8.43	-4.54	-3.26							-4.15	-3.74	-2.05	-2.38	-3.7	-0.589	-2.61
-5.87	-3.49	-4.55	-4.04	-2.07	-8.28	-5.69	-3.21							-3.46	-3.39	-2.27	-2.41	-3.3	0.108	-2.55
-6.04	-3.5	-4.41	-3.54	-2.93	-8.37	-4.68	-3.27							-3.88	-3.19	-2.42	-2.38	-2.97	-0.149	-1.94
-6.3	-2.83	-4.93	-3.83	-3.48	-7.92	-4.94	-3.24							-3.67	-4.53	-2.61	-1.99	-2.84	-0.85	-2.81
-6.27	-3.34	-4.92	-3.79	-2.88	-7.83	-4.01	-3.37							-3.65	-3.19	-2.57	-1.66	-4.46	-0.599	-3.39
-6.03	-2.32	-4.46	-3.55	-2.71	-7.08	-4.87	-3.54							-3.68	-2.85	-2.55	-1.95	-4.15	0.312	-3.69
-6.27	-3.39	-4.73	-3.8	-2.61	-9.2	-3.81	-3.72							-3.51	-3.93	-3.03	-2.07	-3.46	-0.608	-3.23
-6.3	-2.28	-5.02	-4.6	-2.89	-8.29	-4.14	-3.89							-3.36	-3.97	-2.8	-1.86	-3.13	-1.1	-3.69
-6.64	-2.43	-4.8	-4.95	-1.93	-7.78	-5.37	-3.2							-3.95	-3.54	-2.67	-2.07	-4.06	-0.71	-2.87
-6.2	-2.78	-5.42	-4.31	-1.93	-7.8	-4.85	-3.16							-4.55	-3.27	-2.29	-1.92	-2.77	-0.961	-3.33
-6.94	-2.64	-5.18	-4.58	-1.41	-6.53	-4.2	-3.69							-4.16	-3.66	-2.29	-1.94	-2.68	-0.541	-2.14
-6.74	-3.38	-4.34	-4.76	-1.71	-6.39	-3.85	-4.06							-3.62	-3.85	-2.18	-2.52	-3.45	1.81	-1.54
-6.68	-3.34	-4.7	-4.68	-2.06	-6.92	-5.51	-4.11							-4.45	-3.63	-2.13	-1.92	-3.24	0.778	-1.95
-6.52	-3.65	-4.85	-4.41	-2.82	-6.84	-5.23	-3.95							-4.67	-2.81	-2.06	-2.5	-4.27	-1.17	-1.99
-6.8	-2.47	-5.25	-4.33	-2.26	-7.02	-4.58	-3.92							-4.15	-4.37	-2.33	-1.83	-3.28	-1.04	-2.17
-6.18	-2.01	-4.86	-3.71	-2.26	-6.87	-4.39	-3.88							-5.04	-2.75	-2.08	-2.03	-2.42	-0.399	-2.38
-6.02	-3.04	-5	-5.33	-2.57	-7.83	-4.8	-4.25							-5.19	-3.92	-2.36	-2.53	-3.48	0.768	-3.11
-5.68	-3.93	-5.34	-5.23	-2.65	-7.46	-5.31	-4.63							-6.33	-3.66	-2.59	-1.49	-2.79	-0.172	-3.43
-5.11	-3.37	-5.11	-6.08	-2.81	-7.06	-5.56	-4.11							-5.5	-3.39	-2.56	-2.18	-1.27	0.49	-2.3
-4.87	-3.17	-4.71	-4.78	-2.4	-7.01	-5.53	-4.04							-4.73	-3.24	-2.78	-1.89	-1.81	0.186	-2.96
-4.71	-3.06	-5.76	-4.07	-2.52	-7.74	-6.31	-4.06							-4.12	-4.09	-2.42	-2.44	-1.94	-2.13	-1.85
-4.78	-3.12	-4.87	-4.53	-2.5	-7.62	-5.42	-3.82							-4.29	-4.41	-2.81	-2.44	-2.11	-0.635	-2.08
-4.88	-2.24	-4.69	-4.49	-2.64	-6.27	-5.34	-3.4							-4.9	-3.68	-1.94	-2.14	-1.96	0.346	-1.79
-4.87	-3.47	-4.77	-4.82	-3.26	-6.45	-5.21	-3.53							-5.69	-3.05	-1.96	-2.06	-2.31	0.424	-2.02
-5.12	-2.68	-4.71	-4.41	-2.41	-7.02	-5.36	-3.07							-5.2	-4.47	-2	-1.83	-3.16	1	-2.66
-5.05	-3.86	-4.97	-5.22	-2.66	-6.83	-5.97	-3.79							-5.19	-3.67	-2.11	-2.36	-2.92	0.663	-3.25
-4.66	-3.11	-5.5	-5.4	-2.4	-7.05	-6.12	-3.48							-4.07	-3.63	-2.02	-2.23	-2.65	0.0672	-2.26
-5.09	-3.47	-5.08	-4.87	-1.37	-6.7	-5.76	-3.41							-4.32	-3.83	-1.74	-2.28	-1.82	-0.0638	-3.86
-5.55	-3.26	-5.25	-4.8	-1.53	-5.91	-6.39	-3.49							-4.36	-4.96	-2.51	-2.05	-2.7	0.866	-3.31
-5.48	-2.54	-4.81	-4.55	-1.64	-7.59	-5.55	-3.38							-3.95	-3.18	-2.26	-1.79	-1.81	-0.232	-2.81
-5.74	-4.29	-5.45	-3.81	-1.66	-6.49	-5.51	-3.4							-4.66	-3.09	-1.89	-1.37	-2.01	0.0391	-2.66
-5.65	-4.72	-5.61	-3.22	-1.44	-7.02	-5.64	-3.01							-4.18	-3.86	-1.5	-2	-1.42	-0.643	-2.95
-6.11	-4.21	-5.24	-4.45	-1.74	-7.27	-4.81	-3.33							-3.19	-4.04	-1.86	-2.11	-0.377	-0.562	-3.7
-5.8	-2.96	-5.63	-3.91	-1.95	-7.52	-4.41	-3.47							-3.67	-4.71	-2.27	-2.06	-0.538	-0.65	-3.3
-5.89	-2.68	-5.45	-4.38	-1.39	-7.67	-5.13	-3.19							-3.3	-4.03	-2.32	-1.81	-1.51	-0.182	-3.19
-6.04	-3.08	-5.84	-4.61	-1.92	-6.95	-4.41	-3.01							-3.24	-4.15	-2.06	-2	-1.51	-0.828	-2.13
-5.82	-3.63	-5.46	-4.11	-2.54	-6.7	-4.34	-2.53							-3.78	-3.69	-2.12	-1.98	-0.252	-0.536	-2.48
-6.13	-3.77	-5.26	-3.84	-3.41	-7.1	-4.48	-2.76							-3.92	-3.77	-2.43	-2.06	-0.494	-1.32	-3.36
-6.34	-2.36	-5.24	-4.96	-3.27	-6.85	-4.54	-2.99							-3.33	-4.39	-1.99	-1.84	-1.02	-0.381	-3.16
-6.26	-2.82	-5.03	-4.03	-3.07	-5.94	-4.95	-3.08							-3.49	-2.36	-2.3	-2.49	-1.34	-0.699	-2.9
-6.34	-2.77	-5.59	-4.25	-2.02	-7.72	-5.83	-3.64							-3.66	-2.64	-2.24	-2.22	0.643	-0.194	-2.82
-6.28	-1.63	-5.44	-3.8	-2.3	-7.08	-5.04	-3.26							-3.95	-4	-2.35	-1.87	0.656	0.225	-2.16
-5.8	-1.4	-5.15	-4.17	-2.36	-7.21	-5.69	-3.33							-4.12	-3.64	-2.28	-1.94	1.13	0.674	-2.56
-5.99	-1.86	-5.05	-5	-1.68	-8.01	-4.88	-2.94							-3.81	-4.29	-2.8	-2.08	0.779	-1.01	-2.82
-5.8	-3.44	-5.44	-6.11	-1.85	-6.7	-5	-3.41							-4.98	-2.53	-3.06	-2.28	0.654	0.671	-2.53
-5.42	-3.01	-5.73	-5.26	-3.09	-7.82	-5.34	-3.28							-3.7	-3.63	-2.81	-1.89	0.203	0.536	-2.11
-5.33	-1.94	-5.39	-4.98	-2.98	-7.78	-6.19	-3.21							-3.51	-3.59	-2.59	-2.08	-0.927	0.715	-1.4
-4.97	-1.54	-5.03	-4.5	-2.19	-7.13	-5.94	-3.35							-3.15	-3.82	-1.93	-2.14	-1.03	-0.0296	-1.44
-4.13	-2.09	-5.57	-5.15	-2.68	-7.35	-6.68	-3.84							-4.67	-2.78	-1.52	-1.95	-0.35	0.246	-1.82
-4.48	-0.788	-5	-4.19	-3.06	-6.78	-5.67	-2.84							-3.77	-3.96	-2.4	-2.18	-1.04	-0.271	-1.44
-4.45	-1.62	-4.63	-4.24	-3.11	-5.77	-4.9	-3.83							-4.23	-3.31	-2.16	-2.07	-1.12	0.155	-0.947
-4.33	-1.82	-4.88	-3.93	-3.92	-4.9	-5.36	-3.86							-3.4	-3.09	-2.29	-2	-0.636	-1.11	-0.609
-4.78	-0.903	-5.2	-4.41	-2.96	-6.01	-4.8	-3.94							-2.91	-4.29	-2.58	-2.06	-1.3	0.349	-1.64
-4.69	-1.24	-4.89	-3.73	-3.73	-5.9	-5.47	-3.53							-3.45	-3.98	-2.35	-2.12	-0.424	0.806	-1.62
-4.54	-2.17	-5.07	-4.02	-2.82	-5.91	-5.36	-3.41							-2.63	-3.14	-2.47	-2.3	0.00891	0.66	-1.39
-4.6	-2.36	-5.08	-3.89	-2.63	-6.9	-5.35	-3.71							-3.2	-4.2	-2.46	-1.69	-0.334	-2.03	-1.45
-4.78	-2.4	-5.16	-4.33	-2.36	-6.48	-5.15	-3.37							-3.3	-3.97	-2.45	-2.57	0.621	-1.15	-2.04
-4.77	-2.14	-4.82	-4.1	-2.52	-6.35	-5.38	-3.52							-3.57	-4.67	-2.93	-2.56	0.561	-1.01	-1.7
-4.48	-2.48	-4.93	-4.33	-2.55	-6.58	-5.15	-3.37							-3.75	-5.14	-2.89	-2.07	1.2	-1.11	-2.67
-4.91	-2.11	-5.28	-4.24	-2.46	-6.1	-6.16	-3.51							-3.68	-4.22	-2.62	-2.16	0.756	-0.401	-3.01
-5.28	-1.95	-5.56	-3.84	-2.29	-7.09	-6.15	-3.04							-3.95	-3.11	-2.15	-1.74	-0.154	0.174	-1.76
-5.11	-1.4	-5.13	-4.3	-2.08	-6.69	-5.86	-2.9							-2.95	-2.84	-2.39	-1.29	-0.93	-1.3	-2.66
-4.93	-2.14	-5.66	-3.92	-2.02	-7.78	-5.76	-3.4							-2.8	-3.36	-2.28	-1.45	-0.565	-0.614	-3.07
-5.07	-2.98	-5.06	-3.39	-2.51	-6.86	-5.3	-3.61							-3.18	-2.88	-2.41	-2.28	-1.02	-1.21	-2.88
-5.33	-2.26	-5.33	-3.55	-2.39	-8.65	-5.65	-3.42							-3.28	-2.71	-2.49	-1.54	-0.593	-0.521	-2.54
-5.22	-1.69	-5.73	-3.57	-2.1	-7.53	-3.93	-3.34							-3.88	-2.78	-2.39	-2.3	-0.428	1.2	-2.36
-4.98	-1.32	-4.94	-3.53	-1.98	-6.15	-4.23	-3.82							-3.38	-3.91	-1.87	-1.33	-0.936	1.88	-2.65
-4.97	-2.44	-4.63	-3.59	-2.38	-5.71	-4.74	-4.14							-3.51	-3.29	-2.11	-1.64	-1.03	-0.634	-3.12
-4.97	-2.03	-5.37	-3.61	-2.11	-7.49	-4.53	-3.6							-3.83	-4.38	-2.46	-2.04	-0.36	-1.57	-4.15
-4.99	-1.3	-5.25	-3.26	-1.38	-7.18	-4.41	-4.11							-3.96	-3.73	-2.1	-2.45	-1.04	-0.92	-3.76
-4.89	-1.66	-4.46	-4.09	-2.49	-7.86	-4.27	-3.74							-3.18	-5.28	-2.34	-1.74	-0.591	-1.86	-2.79
-4.81	-2.99	-4.56	-4.46	-3.4	-7	-5.33	-3.25							-3.95	-4.58	-2.18	-2.33	0.375	-0.761	-3.45
-4.54	-3.22	-5.02	-4.61	-3.77	-6.11	-5.43	-3.13							-3.91	-3.69	-2.4	-2.39	-0.678	-0.0572	-2.26
-5.18	-3.97	-4.91	-4.11	-3.31	-6.88	-5.2	-2.05							-4.03	-3.51	-2.32	-2.45	-0.482	0.419	-2.9
-5.04	-2.82	-4.5	-4.74	-2.28	-7.39	-5.46	-2.18							-3.58	-2.67	-2.54	-1.76	-0.594	-1.3	-2.32
-4.63	-2.41	-5.01	-5.24	-2.02	-8.12	-5.61	-3.01							-3.69	-3.82	-1.98	-1.89	-0.615	-1.98	-1.84
-4.5	-3.75	-4.89	-4.54	-2.37	-6.83	-4.84	-3.1							-3.75	-3.68	-1.91	-1.65	-1.32	-0.0718	-2.2
-4.3	-2.85	-4.54	-4.44	-2.32	-5.71	-5.01	-2.43							-3.7	-4.05	-1.5	-1.95	-1.44	-1.17	-1.7
-4.73	-3.26	-4.58	-4.9	-2.77	-6.49	-5.27	-2.02							-3.96	-4.03	-1.95	-2.49	-1.12	-0.641	-2.63
-4.97	-2.93	-4.56	-3.6	-2.89	-6.45	-4.29	0.285							-3.17	-4.28	-2.1	-2.22	-1.52	0.935	-2.99
-4.39	-2.99	-4.9	-5.02	-3.29	-6.96	-3.88	1.46							-3.54	-2.77	-2.1	-2	-0.154	0.198	-1.66
-4.49	-2.7	-5.84	-4.53	-4.55	-6.86	-3.33	2.08							-3.43	-3.77	-2.12	-2.45	-0.135	0.205	-2.95
-4.91	-2.53	-5.03	-4.73	-3.7	-5.83	-4.5	0.628							-3.54	-3.68	-2.37	-2.22	-0.357	-0.77	-3.28
-5.38	-2.76	-4.8	-4.23	-3.04	-6.54	-5.67	0.58							-3.84	-3.34	-2.12	-2.2	-0.593	-0.744	-3.27
-5.02	-2.43	-5.67	-4.27	-2.67	-6.74	-5.62	0.323							-3.29	-2	-2.21	-2.01	-1.01	-1.65	-3.78
-5.31	-1.58	-5.56	-4.38	-3.2	-6.07	-5.74	0.268							-4.26	-3.75	-2.54	-0.84	-0.739	1.18	-2.38
-4.94	-2.25	-5.13	-5.13	-2.42	-5.23	-5.77	0.719							-3.72	-3.85	-2.61	-0.862	-0.957	-0.696	-2.45
-5	-2.42	-5.5	-4.95	-2.07	-6.75	-5.85	-0.104							-3.12	-4.06	-2.76	-1.24	-1.5	-1.62	-2.57
-4.76	-3.6	-5.61	-4.77	-2.79	-7.5	-5.11	-0.45							-2.6	-3.22	-2.71	-1.05	-0.729	-0.87	-2.68
-4.97	-2.39	-4.89	-4.64	-2.65	-7.23	-6.05	-0.289							-3.02	-4.37	-2.06	-1.6	-1.42	-2.27	-2.5
-4.82	-2.88	-4.79	-4.91	-2.84	-6.9	-6.61	-0.638							-2.8	-2.83	-1.57	-1.39	-0.948	-0.98	-2.3
-4.71	-2.75	-5.49	-4.03	-2.26	-5.77	-5.95	-0.185							-3.63	-3.63	-1.87	-1.57	-0.157	-1.39	-2.7
-4.6	-2.74	-5.65	-4.43	-2.86	-6.24	-5.77	-0.211							-3.77	-4.08	-1.84	-1.96	-1.01	-0.135	-2.74
-4.79	-2.67	-5.56	-4.09	-3.02	-6.53	-5.4	-0.266							-5.02	-4.26	-2.14	-1.61	-1.29	1.32	-1.97
-4.39	-3.08	-6.02	-4.05	-3.03	-6.69	-6.25	-1.24							-4.59	-3.63	-1.87	-1.72	-1.15	0.594	-2.1
-4.71	-2.4	-5.54	-4.58	-2.74	-6.38	-5.26	-1.48							-3.84	-3.13	-2.14	-1.87	-0.879	-0.61	-2.03
-4.81	-2.89	-5.04	-4.24	-3.07	-6.94	-5.46	-1.28							-3.66	-3.13	-2.41	-1.46	-0.174	-1.79	-1.75
-4.64	-2.93	-5.82	-3.87	-3.25	-5.73	-6.25	-0.863							-3.94	-4.08	-2.09	-2.17	0.0913	-1.7	-1.71
-4.68	-3.67	-5.58	-3.95	-2.96	-6.38	-5.77	-1.11							-3.52	-4.95	-2.35	-1.54	-0.0819	-1.69	-1.62
-4.82	-3.64	-5.05	-3.68	-2.66	-5.85	-5.42	-1							-3.08	-4.54	-2.56	-1.42	0.573	0.244	-0.912
-4.56	-3.23	-5.8	-3.22	-4.08	-7.77	-6.07	-0.952							-4.07	-3.9	-2.37	-1.51	-0.318	-1.1	-0.547
-4.7	-2.29	-5.71	-4.56	-2.6	-6.28	-5.36	-1.03							-4.54	-3.8	-2.4	-1.62	-0.191	0.372	-0.826
-4.29	-2.43	-4.65	-3.14	-2.06	-6.35	-5.49	-1.39							-3.53	-3.1	-2.34	-2.12	-0.127	-0.258	-1.46
-4.04	-1.4	-5.32	-3.88	-2.21	-6.39	-5.51	-1.42							-3.37	-4.25	-2.45	-1.6	-0.182	-0.879	-1.34
-3.9	-2.03	-4.89	-3.69	-2.11	-6.13	-4.68	-1.61							-3.66	-3.61	-2.46	-2.02	-0.439	-0.838	-0.781
-3.68	-1.44	-5.35	-3.23	-3.12	-6.66	-4.12	-1.68							-4.68	-4.53	-2.44	-1.6	-0.936	0.26	-1.26
-3.4	-2.41	-5.12	-3.75	-2.49	-5.34	-4.18	-1.84							-3.28	-3.14	-2.88	-1.71	-0.663	-0.168	-1.67
-4.33	-2.98	-4.9	-3.95	-2.81	-4.93	-3.54	-2.39							-3.26	-3.35	-2.51	-1.62	-0.582	1.03	-0.93
-4.32	-3.14	-5.28	-3.44	-2.92	-5.59	-4.6	-2.17							-3.7	-3.47	-2.27	-2.13	-0.846	1.14	-2.15
-4.58	-3.07	-5.61	-4.54	-3.47	-4.89	-4.52	-1.95							-4.05	-3.97	-2.62	-1.6	-1.32	1.27	-3.38
-4.93	-1.87	-5.45	-4.69	-2.74	-5.63	-4.97	-2.24							-3.21	-4.11	-2.42	-1.69	-1.03	-0.11	-2.19
-4.98	-2.54	-5.28	-4.37	-2.09	-4.72	-4.59	-1.43							-3.38	-3.98	-2.29	-1.86	-1.01	-1.06	-2.07
-5.18	-3.24	-4.97	-3.82	-3.1	-6.33	-4.41	-1.05							-4.42	-4.67	-2.22	-1.99	-1.35	-0.181	-2.12
-5.17	-3.23	-5.05	-4.99	-2.52	-5.73	-4.64	-0.954							-3.36	-4.11	-2.24	-1.36	-1.2	0.398	-1.39
-4.95	-2.88	-5.34	-4.6	-2.99	-6.29	-4.56	-1.14							-3	-4.61	-2.49	-1.57	-2.7	2.11	-0.833
-5.09	-3.21	-5.38	-5.4	-3.09	-5.59	-4.32	-1.04							-3.85	-4.32	-2.86	-1.76	-2.73	0.621	-0.741
-4.98	-2.18	-5.31	-4.09	-2.69	-5.48	-3.93	-1.43							-4.28	-4.4	-2.42	-1.48	-2.13	-0.607	-0.76
-4.6	-2.36	-5.5	-4.24	-2.44	-5.45	-5.45	-1.33							-3.99	-3.75	-1.69	-1.29	-2.4	-0.187	-0.34
-4.91	-2.75	-4.97	-4.33	-1.82	-6.7	-4.81	-1.48							-3.62	-4.28	-2.65	-1.75	-1.74	-0.898	-0.912
-4.87	-3.34	-5.23	-4.4	-2.76	-6.2	-4.43	-1.12							-4.34	-3.78	-2.62	-1.97	-1.79	0.079	-1.83
-5.09	-2.48	-5.03	-4.49	-2.39	-6.26	-5.09	-1.5							-3.72	-4.48	-2.55	-2.21	-1.64	-0.831	-1.85
-4.65	-2.76	-5.3	-4.39	-1.33	-6.46	-4.77	-2.46							-4.09	-4.86	-2.77	-1.79	-1.38	-0.444	-2.47
-4.75	-3.22	-5.3	-5.17	-1.63	-5.67	-3.86	-2.25							-3.65	-4.63	-2.84	-2.05	-0.794	0.404	-1.38
-4.63	-2.83	-5.33	-4.37	-1.27	-6.31	-4.98	-1.87							-2.91	-4.43	-3.36	-1.98	-1.88	0.667	-1.21
-4.55	-3.11	-5.1	-5.43	-1.61	-6.17	-4.68	-1.93							-2.96	-4.35	-2.94	-1.94	-1.49	-0.466	-1.63
-4.99	-3.52	-5.7	-4.82	-1.57	-7.35	-4.66	-1.58							-3.39	-4.27	-2.89	-1.02	-1.03	-0.425	-0.757
-4.91	-3.04	-5.72	-5.05	-1.91	-6.41	-5.38	-1.74							-3.47	-3.26	-2.78	-1.36	-1.21	-1.71	-0.939
-5	-2.78	-5.12	-4.11	-1.63	-5.82	-4.48	-2.06							-4.21	-4.12	-2.57	-0.802	-0.098	-1.13	-1.74
-5.08	-3.9	-5.29	-4.78	-1.58	-5.31	-5.97	-1.9							-3.11	-4.27	-2.51	-1.89	-1.34	0.0288	-1.45
-5.1	-3.45	-5.9	-5.54	-1.07	-4.63	-6.06	-2							-3.37	-4.81	-2.29	-1.45	-0.881	-0.285	-2.01
-5.25	-3.82	-5.48	-4.7	-1.05	-6.14	-5.07	-2.32							-3.75	-3.99	-1.86	-1.78	-1.35	-1.81	-1.73
-4.93	-3.12	-4.96	-4.41	-1.16	-6.75	-5.28	-1.67							-3.85	-4.09	-2.51	-1.92	-0.765	-0.896	-1.53
-4.47	-3.96	-5.3	-5.11	-1.26	-7.27	-4.91	-2.39							-4.03	-3.76	-2.28	-1.66	-1.37	-0.725	-1.02
-4.61	-4.81	-5.58	-4.99	-2.05	-6.68	-5.62	-1.82							-4.08	-4.15	-2.39	-1.83	-1.15	-0.197	-0.384
-4.96	-4.91	-5.36	-4.31	-1.93	-6.35	-5.07	-2.26							-3.28	-4.41	-2.52	-1.56	-0.536	1.27	-1.54
-4.85	-4.59	-5.7	-4.22	-1.25	-6.17	-4.75	-2.55							-3.8	-4.75	-2.81	-1.55	-0.639	-0.602	-1.35
-4.54	-4	-5.78	-4.34	-1.46	-6.26	-5.65	-2.83							-3.8	-3.69	-2.49	-1.49	-0.624	-0.835	-1.77
-4.58	-3.13	-5.72	-4.83	-1.21	-5.85	-4.91	-2.35							-3.22	-4.21	-2.69	-1.63	-0.846	-0.114	-1.04
-4.58	-3.23	-5.56	-4.89	-1.35	-6.28	-6.04	-2.73							-3.49	-3.97	-2.36	-1.73	-1.43	-0.496	-2.36
-4.83	-4.2	-5.74	-4.73	-2	-5.12	-6.2	-2.44							-3.58	-3.76	-2.68	-1.62	-1.02	0.158	-1.73
-4.55	-3.68	-5.41	-5.13	-2.34	-5.89	-5.39	-1.84							-3.97	-4.2	-2.82	-2.15	-1.24	0.184	-2.47
-4.81	-4.05	-6.02	-4.8	-2.31	-4.99	-5.33	-1.95							-3.47	-3.59	-2.49	-1.99	-0.745	-0.32	-2.29
-4.46	-4.29	-5.28	-5.38	-2.56	-5.36	-5.51	-2.2							-3.85	-4.61	-2.74	-1.77	-1.6	0.203	-1.51
-4.66	-4	-5.87	-4.42	-3.7	-5.3	-4.53	-1.7							-2.97	-3.44	-2.72	-1.93	-1.98	-0.109	-1.74
-5.17	-4.9	-6.09	-4.99	-3.2	-5.23	-5.6	-1.93							-3.64	-4.36	-2.53	-1.77	-2.11	-0.348	-1.71
-5.58	-3.62	-5.8	-5.52	-2.55	-4.59	-5.47	-1.95							-3.28	-4.22	-2.61	-1.45	-1.71	-0.0298	-2.42
-4.92	-4.5	-5.56	-5.68	-2.3	-5.81	-5.35	-2.54							-2.87	-3.82	-2.62	-1.34	-1.31	-0.656	-2.45
-4.79	-3.69	-5.69	-4.43	-2.71	-5.89	-5.7	-2.26							-3.34	-4.67	-2.7	-1.61	-1.75	0.0754	-1.55
-4.34	-3.74	-6.26	-4.28	-3.29	-6.5	-6.52	-2.12							-2.35	-4.5	-2.2	-2.18	-2.19	-1.12	-2.97
-4.85	-3.72	-6.63	-3.61	-2.25	-5.58	-6.98	-2.33							-2.73	-4.3	-2.41	-1.7	-1.77	0.322	-2.23
-4.54	-4.33	-5.72	-4.65	-2.06	-5.48	-5.88	-2.55							-2.9	-3.85	-2.23	-2.21	-1.57	0.123	-2.81
-4.38	-2.72	-5.86	-4.88	-2.03	-5.27	-4.73	-2.64							-2.52	-4.24	-2.29	-2.18	-2.59	0.388	-2.66
-4.52	-3.32	-6.02	-4.87	-2.07	-4.88	-4.5	-1.81							-3.37	-4.37	-1.68	-2.7	-1.23	0.143	-2.05
-3.69	-3.63	-5.07	-4.7	-2.99	-5.04	-4.97	-2.06							-4.1	-3.67	-1.15	-2.04	-1.82	0.0232	-2.12
-4.01	-3.76	-5.54	-4.99	-2.58	-4.68	-4.37	-1.55							-3.18	-4.38	-0.285	-1.46	-1.82	-0.188	-2.27
-3.89	-2.83	-5.61	-4.73	-2.12	-4.72	-4.85	-1.64							-3.62	-4.22	-0.737	-1.14	-2.07	0.667	-1.56
-4.43	-3.59	-5.17	-3.98	-2.29	-3.84	-4.2	-1.38							-4.05	-4.96	-0.628	-1.12	-1.95	-0.418	-1.99
-4.47	-3.49	-5.34	-3.93	-2.25	-4.07	-4.96	-1.28							-3.08	-4.12	-0.54	-1.57	-3.01	-0.389	-2.31
-4.84	-2.67	-5.44	-4.63	-2.84	-4.78	-4.16	-1.71							-3.23	-5.01	-1.05	-1.57	-2.27	-1.27	-2.6
-4.79	-3.42	-5.59	-4.24	-2.29	-4.16	-4.56	-1.09							-3.68	-4.13	-1.27	-0.917	-2.92	-2.26	-3.12
-4.5	-2.88	-5.72	-4.94	-2.42	-5.75	-4.27	-0.314							-4.08	-4.21	-0.947	-0.69	-2.34	-0.409	-2.59
-4.21	-2.5	-5.82	-4.86	-2.53	-4.85	-4.95	0.534							-3.73	-3.64	-1.59	-1.73	-0.854	0.32	-3.17
-4.72	-2.76	-5.32	-4.28	-2.6	-4.38	-4.47	0.726							-3.67	-2.77	-0.624	-1.3	-2.68	-0.575	-4.21
-4.5	-2.64	-5.76	-4.42	-2.84	-4.73	-3.89	0.58							-3.03	-3.77	-0.747	-1.38	-2.21	0.845	-3.48
-4.73	-4.02	-5.07	-4.19	-2.28	-5.17	-4.58	0.885							-3.18	-3.98	-0.697	-2.05	-2.57	-0.284	-3.45
-5.01	-3.96	-5.74	-4.57	-3.17	-4.4	-4.58	-0.0254							-3.84	-4.39	-0.875	-2	-2.91	-1.39	-2.72
-5.38	-3.58	-5.67	-4.37	-2.39	-4.53	-4.88	-0.36							-4.2	-3.51	-0.947	-2.14	-2.66	-1.09	-2.9
-6.1	-4.05	-5.4	-4.4	-3.23	-5.03	-4.2	-0.514							-3.48	-4.09	-1.23	-1.8	-1.92	-0.174	-2.44
-6.42	-4.19	-4.7	-4.25	-2.78	-5.79	-4.55	-0.452							-3.35	-3.77	-0.808	-2.11	-1.14	0.388	-1.9
-6.27	-3.51	-4.98	-4.62	-3.62	-5.7	-4.27	-1.02							-3.15	-3.62	-0.446	-1.71	-1.32	-1.05	-2.44
-5.79	-4.56	-5.74	-4.82	-3.22	-5.27	-4.09	-1.01							-3.84	-3.77	-0.839	-1.35	-0.271	-1.94	-1.62
-6.52	-3.52	-4.9	-4.16	-2.41	-5.41	-3.64	-0.768							-3.57	-4.02	-0.649	-1.57	-0.527	-0.0365	-1.1
-6.26	-3.33	-5.44	-3.89	-1.95	-4.89	-4.71	-0.917							-2.78	-4.5	-0.477	-1.73	-1.72	-0.638	-2.36
-5.42	-3.03	-5.75	-3.48	-2.81	-3.88	-3.95	-1.25							-3.04	-4.15	-0.219	-2.18	-1.67	-0.477	-2.23
-4.81	-3.19	-4.9	-4.26	-3.13	-5.04	-4.06	-0.701							-2.75	-4.01	-0.549	-2.09	-0.737	-0.986	-1.83
-4.82	-3.18	-5.58	-4.35	-1.72	-4.45	-3.46	-1.23							-2.88	-4.24	-0.917	-1.83	-0.563	-0.614	-1.02
-4.55	-3.66	-5.79	-4.07	-2.17	-4.95	-3.97	-0.887							-3.18	-3.01	-0.776	-2.39	-0.349	0.195	-1.36
-4.52	-3.58	-5.43	-5.06	-2.58	-5.25	-4.1	-0.592							-3.22	-4.82	-0.595	-2.04	-0.619	-0.0305	-0.245
-4.26	-3.43	-6.23	-4.2	-4.01	-5.28	-4.98	0.514							-3.23	-4.33	-0.937	-1.71	-0.855	0.582	-1.92
-3.78	-4.1	-4.97	-3.52	-2.88	-6.03	-4	0.723							-3.11	-4.6	-0.854	-2.15	-0.854	-1.99	-1.2
-3.46	-3.57	-5.41	-2.7	-2.34	-5.62	-3.56	0.649							-3.27	-4.32	-1.05	-1.84	-1.3	-0.953	-0.593
-2.99	-3.6	-4.93	-2.88	-1.88	-5.46	-3.86	0.274							-3.95	-4.2	-1.01	-1.7	-1.06	-1.47	-0.839
-2.48	-2.98	-5.96	-3.58	-2.37	-5.86	-4.83	0.774							-3.31	-4	-1.22	-1.24	-1.31	-1.03	-1.31
-2.45	-3.77	-5.65	-2.68	-2.84	-4.72	-5.01	0.714							-1.78	-3.91	-1.28	-1.84	-0.991	-1.44	-0.951
-2.76	-3.96	-5.25	-3.12	-2.7	-4.56	-5.81	0.366							-0.954	-3.1	-1.55	-1.83	-0.535	-0.277	-1.57
-2.88	-3.82	-5.02	-3.22	-1.76	-4.98	-4.89	0.585							-1.27	-3.83	-1.26	-1.66	-1.49	-1.47	-1.3
-2.86	-3.46	-5.68	-2.29	-1.42	-4.87	-5.16	0.668							-1.1	-3.96	-1.36	-2.11	-1.13	-0.0323	0.0111
-2.97	-2.75	-5.57	-2.95	-1.59	-6.64	-5.34	0.436							-1.13	-4.44	-1.03	-2.36	-1.1	-0.356	-1.52
-3.12	-2.44	-5.33	-3.72	-2.28	-5.19	-4.62	0.291							-1.57	-2.97	-1.47	-2.18	-1.36	-1.31	-0.942
-3.7	-2.41	-5.1	-4.51	-1.9	-5.23	-4.79	0.355							-2.31	-3.49	-1.14	-2.18	-0.253	-1.03	-0.895
-3.09	-1.66	-5.59	-3.07	-1.96	-5.65	-4.3	0.431							-2.09	-2.8	-1.5	-2.42	-0.299	-0.912	0.552
-2.37	-3.13	-5.02	-2.9	-2.29	-5.23	-5	0.424							-2.06	-5.39	-2.22	-2.05	0.523	-0.692	0.41
-2.63	-1.98	-5.85	-2.86	-2.4	-5.67	-4	0.0507							-1.83	-4.75	-1.44	-1.9	1	-0.624	0.272
-3.29	-3.38	-5.98	-2.35	-4.22	-6.6	-4.84	-0.283							-2.35	-5.23	-1.39	-2.35	0.693	-0.119	0.313
-2.73	-2.98	-5.53	-3.04	-4.52	-6.39	-3.81	0.0932							-2.38	-4.84	-0.958	-1.91	2.07	-0.915	-0.608
-3.66	-2.8	-5.46	-3.78	-3.26	-6.67	-5.5	0.153							-2.46	-4.08	-1.51	-1.97	1.48	0.497	-1.63
-2.99	-2.96	-5.73	-3.69	-2.3	-5.98	-7.01	0.426							-2.15	-5.22	-0.83	-1.86	1.72	-0.437	-1.92
-2.45	-3.63	-5.85	-3.67	-2.4	-5.62	-5.17	0.315							-2.48	-4.67	-0.0892	-1.85	1.81	0.468	-0.552
-2.22	-3.16	-5.58	-3.16	-2.11	-5.2	-4.45	0.34							-1.73	-3.75	-1.31	-2.27	2.18	0.0496	-0.735
-2.68	-2.96	-5.87	-3.94	-2.12	-5.03	-4.46	0.401							-2.39	-3.58	-1.15	-1.74	1.2	0.522	-0.771
-3.34	-3.76	-5.49	-4.39	-1.96	-4.81	-4.54	0.466							-2.59	-4.17	-0.853	-1.97	1.03	-0.812	-0.323
-3.21	-3.22	-5.7	-4.63	-2.61	-5.63	-4.72	0.346							-1.72	-4.62	-1.19	-2.45	0.305	-0.91	-1.01
-3.43	-3.32	-5.84	-3.88	-2.09	-4.99	-5.48	-0.558							-2.35	-2.76	-0.37	-2.08	0.319	0.433	-0.54
-4.08	-3.68	-6.02	-4	-2.04	-4.82	-4.33	-0.188							-2.53	-5.25	-0.637	-1.71	0.0363	0.144	-1.22
-4.22	-4	-5.28	-3.8	-1.2	-5.38	-4.48	-0.0569							-2.49	-4.64	-0.224	-2.15	-0.134	-0.114	-0.935
-3.49	-3.74	-4.85	-4.09	-1.41	-5.32	-4.2	-0.245							-3.06	-4.73	-0.864	-2.09	0.247	-0.242	-0.243
-2.9	-4.49	-5.69	-4.61	-1.53	-6.39	-5.59	-1.06							-3.22	-4.05	-1.06	-1.69	0.288	-0.332	-1.27
-3.03	-2.63	-5.95	-4.39	-1.68	-6.09	-4.98	-0.545							-3.3	-4.86	-1.7	-1.88	0.124	-1.24	-0.939
-3.02	-3.72	-5.42	-4.49	-1.71	-5.94	-4.8	-0.222							-3.23	-3.78	-1.94	-1.74	-0.131	-0.79	-1.11
-3.88	-3.85	-5.47	-4.56	-2.05	-5.84	-4.91	-0.549							-4.13	-3.91	-1.54	-1.92	-0.78	0.105	-2.04
-3.41	-3.32	-5.5	-5.05	-0.956	-5.1	-5.12	-0.934							-2.8	-4.08	-1.69	-2.14	-0.769	0.419	-2.79
-4.13	-3.29	-5.63	-4.06	-1.63	-6.8	-4.99	-0.142							-2.33	-3.69	-1.39	-2.3	0.101	0.19	-2.36
-4.03	-2.95	-4.99	-3.27	-1.85	-4.89	-5.74	-0.504							-3.1	-4.2	-1.57	-2.33	0.179	-0.589	-0.445
-4.03	-3.13	-5.66	-4.43	-1.32	-6.37	-5.13	-0.144							-3.22	-4.11	-1.13	-2.59	-0.385	-0.0333	-1.65
-3.72	-2.87	-5.58	-3.31	-1.57	-5.09	-5.21	0.158							-3.04	-3.88	-1.48	-1.83	-1.59	-0.697	-2.26
-3.96	-4.04	-4.95	-3.55	-1.75	-5.77	-4.77	-0.409							-2.32	-4.9	-1.29	-2.5	-1.01	-0.0195	-2.24
-4.42	-3.65	-5.64	-3.66	-2.02	-6	-5.61	0.7							-1.81	-4.14	-1.25	-1.91	-0.547	-0.806	-2.27
-4.46	-3.72	-5.42	-4.5	-0.93	-5.94	-5.41	1.34							-2.19	-4.11	-1.3	-1.93	-0.685	-0.00679	-1.52
-4.57	-3.93	-5.57	-4.06	-0.96	-6.2	-6.02	1.5							-2.59	-3.88	-1.36	-2.22	-0.35	-1.1	-1.95
-4.34	-3.87	-5.45	-4.06	-1.09	-6.18	-6.48	1.03							-2.69	-4.09	-1.33	-1.98	0.299	0.0186	-2.21
-4.56	-3.61	-5.2	-4.06	-0.745	-6.45	-4.59	0.27							-2.21	-3.5	-1.32	-1.67	-0.0136	-1.25	-2.23
-4.45	-3.21	-6.07	-3.64	-0.831	-6.72	-5.45	-0.892							-3.24	-3.89	-1.84	-2.21	-0.832	-1.37	-2.21
-4.45	-4.04	-5.96	-3.65	-1.04	-6.82	-5.39	-0.978							-2.77	-4.45	-2.22	-1.93	-0.84	-1.46	-2.21
-4.99	-3.69	-5.81	-3.97	-0.738	-5.99	-5.93	-0.392							-2.99	-3.3	-2.3	-2.14	-0.672	-1.98	-2
-5.18	-2.53	-5	-4.2	-0.975	-6.07	-5.86	-0.574							-2.69	-2.89	-1.8	-1.9	-1.98	-0.426	-2.83
-5.64	-3.84	-4.71	-4.36	-1.21	-7.11	-4.64	-0.549							-2.71	-3.58	-1.65	-1.68	-1.21	-1.65	-2.73
-5.11	-4.02	-5.6	-4.65	-0.903	-6.66	-5.52	-0.305							-2.65	-3.15	-1.48	-1.99	-1.59	-0.369	-2.9
-4.82	-2.67	-5.36	-5.15	-1.33	-6.71	-5.93	-0.108							-3.1	-4.06	-1.73	-2.31	-1.29	-0.714	-2.6
-4.18	-4.03	-4.65	-4.39	-1.64	-5.99	-5.62	0.0768							-2.55	-3.65	-1.51	-2.79	-1.25	-0.173	-2.5
-4.18	-2.95	-5.74	-4.14	-1.96	-5.96	-4.97	-0.317							-2.78	-4.51	-0.918	-2.71	-1.71	-0.326	-1.88
-5.21	-2.01	-5.7	-4.42	-1.64	-5.49	-4.22	-0.451							-2.68	-4.54	-1.08	-2.54	-1.22	-0.0962	-2.35
-5.77	-3.87	-5.65	-5.24	-1.56	-6.98	-5	-0.305							-2.55	-3.85	-1.33	-2.55	-1.94	0.324	-2.02
-5.66	-3.1	-5.42	-3.87	-2.03	-5.99	-4.69	-0.25							-2.36	-3.7	-1.14	-1.96	-1.02	-0.704	-2.22
-5.13	-3.4	-5.3	-4.44	-1.31	-5.43	-4.15	-1.12							-1.94	-3.85	-1.58	-1.43	-1.61	-0.85	-2.21
-5.24	-3.24	-5.62	-3.38	-1.91	-5.8	-4.12	-1.07							-1.96	-2.98	-1.07	-1.63	-1.67	0.428	-1.19
-5.23	-2.88	-5.18	-3.54	-2.37	-4.98	-3.61	-0.898							-3.77	-3.69	-1.49	-1.98	-1.44	0.369	-1.96
-5.33	-3.71	-4.94	-3.05	-1.8	-5.59	-3.19	-1.1							-2.9	-4.32	-1.76	-1.41	-0.934	0.152	-1.95
-5.59	-4.5	-5.12	-3.21	-2.85	-4.49	-3.86	-1.1							-3.88	-4.39	-2.11	-1.95	-1.54	-0.544	-1.8
-4.93	-3.1	-5.12	-3.7	-2.34	-5.19	-3.55	-0.247							-2.81	-4.45	-1.7	-1.88	-2.19	-0.373	-1.65
-4.46	-3.42	-6.1	-3.06	-3.31	-5.3	-3.43	-0.471							-2.01	-3.1	-1.73	-2.26	-1.42	-0.281	-1.43
-4.9	-3.45	-5.86	-2.91	-3.14	-5.09	-3.06	-0.495							-1.52	-3.75	-1.73	-2.09	-2.41	-1.16	-1.98
-5.32	-3.63	-6.19	-3.1	-2.86	-7	-3.3	-1.02							-2.07	-4.47	-1.82	-1.98	-1.77	0.483	-2.16
-5.32	-3.02	-6.15	-2.66	-2.64	-5.34	-4.05	-0.571							-2.38	-5.28	-1.8	-1.84	-1.95	-0.313	-1.24
-5	-3.34	-6.59	-2.41	-2.78	-4.47	-3.67	-0.0895							-3.56	-4.55	-1.95	-1.38	-1.32	-0.795	-1.67
-4.92	-1.64	-5.56	-3.24	-2.71	-6.22	-3.49	-0.132							-1.82	-3.01	-1.44	-2.34	-1.68	-1.33	-1.36
-5.14	-2.63	-5.57	-3.22	-2.01	-5.31	-3.72	0.0667							-2.5	-4.26	-2.02	-1.75	-0.793	-3.47	-1.61
-5.06	-2.47	-5.94	-2.51	-1.86	-5.25	-3.34	0.0878							-2.55	-4.54	-2.12	-1.75	-1.91	-1.48	-2.35
-4.92	-4.04	-5.31	-2.79	-3.03	-5.34	-3.2	-0.346							-3	-4.73	-2.03	-1.98	-1.57	0.428	-2.51
-3.79	-3.41	-5.09	-3.2	-1.72	-4.95	-3.95	-0.429							-2.47	-4.19	-1.82	-1.72	-1.09	0.349	-2.62
-3.71	-3.39	-5.16	-3.34	-2.54	-4.98	-4.06	-0.401							-2.58	-3.02	-2.23	-2.27	-2.03	0.109	-3.19
-3.66	-4.42	-5.1	-3.81	-2.52	-3.96	-4.01	-0.314							-2.23	-3.69	-2.38	-1.99	-2.15	-0.156	-2.29
-4.29	-3.57	-5.12	-4.12	-2.8	-4.59	-3.21	-0.183							-2.42	-4.58	-1.94	-1.23	-2.54	-0.124	-1.68
-4.98	-2.36	-4.82	-3.62	-1.89	-5.2	-3.04	-0.0748							-2.6	-3.07	-2.11	-1.93	-2.04	-0.407	-2.06
-4.82	-3.66	-5.13	-4.75	-1.87	-4.76	-3.56	-0.995							-2.58	-4.86	-2.48	-2.02	-2.46	0.502	-1.56
-4.63	-3.74	-5.69	-3.88	-2.24	-4.26	-3.47	-1.07							-2.63	-4.45	-2.46	-1.82	-2	-0.132	-1.54
-5.12	-3.3	-4.79	-3.63	-1.91	-3.86	-3.51	-1.14							-2.51	-3.57	-1.88	-2.1	-2.12	-0.687	-1.65
-4.98	-3.57	-5.23	-3.15	-1.87	-4.21	-3.9	-0.324							-3.17	-3.73	-2.07	-1.79	-2.48	-0.583	-1.16
-4.96	-4.19	-5.71	-3.34	-1.4	-4.38	-3.07	-0.27							-3.27	-3.91	-2.21	-1.97	-2.2	0.0559	-1.6
-4.69	-2.76	-5.32	-3.56	-1.19	-4.84	-1.78	-0.0718							-3.32	-2.98	-2.42	-2.35	-2.75	-0.732	-1.02
-4.75	-1.64	-5.52	-2.92	-1.64	-4.95	-2.98	0.287							-2.51	-4.12	-2.31	-2.5	-2.07	-0.464	-2.09
-4.63	-2.08	-5.59	-3.51	-3.04	-4.08	-2.72	-0.0867							-2.09	-4.15	-2.49	-1.34	-2.63	-1.37	-1.06
-4.4	-1.81	-5.48	-3.62	-3.41	-4.6	-2.94	-0.626							-2.02	-3.5	-2.66	-2.22	-2.75	-0.96	-0.661
-3.52	-2.31	-5.23	-3.02	-3.79	-3.69	-3.24	-0.607							-2.36	-3.1	-2.36	-2.36	-3.04	-0.257	-1.32
-2.81	-2.33	-4.33	-3.56	-3.87	-4	-3.46	-0.771							-2.54	-4.23	-2.57	-2.51	-1.76	-0.118	-1.41
-3.67	-2.16	-4.03	-4.22	-3.18	-5.53	-3.29	-1.05							-3	-3.64	-2.45	-2.36	-2.9	0.419	-1.57
-4.24	-1.8	-4.75	-4.32	-3.46	-4.42	-3.2	-0.603							-2.53	-3.23	-2.18	-1.83	-2.68	1.68	-2.21
-4.58	-2.13	-4.57	-3.49	-2.97	-4.96	-3.96	-1.01							-3.43	-4.41	-2.46	-2.61	-2.47	0.407	-1.58
-4.58	-2.15	-4.38	-4.05	-2.63	-5.8	-3.84	-0.528							-3.22	-3.69	-1.83	-1.92	-2.9	-1.06	-2.24
-3.39	-1.82	-4.84	-3.83	-2.39	-4.49	-4.85	-0.78							-3.19	-4	-2.35	-1.93	-2.4	-0.858	-2.2
-2.79	-1.37	-3.99	-3.71	-2.1	-4.35	-4.51	-0.933							-3.88	-3.51	-2.73	-2.46	-1.61	0.569	-1.26
-2.58	-0.831	-4.13	-3.92	-2.46	-2.54	-4.48	-1.82							-3.85	-3.06	-2.68	-2.12	-2.09	1.02	-1.21
-2.91	-1.42	-4.54	-3.81	-2.44	-4.62	-4.12	-1.8							-3.4	-3.65	-2.44	-1.45	-2.18	0.0345	-3.05
-3.3	-2.13	-4.26	-4.01	-2.47	-4.58	-4.57	-1.17							-4.44	-3.68	-2.83	-2.07	-2.02	-0.171	-2.55
-2.72	-1.32	-5.28	-3.89	-2.63	-4.91	-4.58	-1.43							-4.55	-4.48	-2.37	-1.62	-1.88	-0.0294	-1.99
-3.05	-2.14	-4.38	-3.23	-2.12	-5.1	-4.61	-1.65							-4.13	-3.61	-2.4	-2.2	-1.99	-0.963	-2.95
-3.26	-0.624	-5.12	-2.77	-2.67	-6.41	-4.42	-1.6							-4.01	-3.76	-2.5	-2.36	-2.24	-0.609	-2.71
-3.11	-2.32	-4.52	-3.7	-1.35	-5.46	-4.7	-1.13							-3.18	-4.71	-2.38	-2.21	-2.11	-0.379	-2.18
-3.54	-1.75	-4.83	-4	-1.82	-4.39	-4.71	-1.55							-3.29	-4.44	-2.41	-2.19	-2.7	0.232	-1.74
-4.46	-1.86	-3.93	-3.38	-2.09	-5.28	-4.28	-1.35							-4.51	-4.32	-2.79	-2.11	-1.72	0.684	-1.18
-4.18	-1.72	-3.95	-3.93	-2.35	-5.14	-4.23	-1.35							-3.89	-3.65	-2.36	-2.14	-1.09	0.945	-2.03
-3.97	-1.75	-5.28	-3.19	-2.13	-6.23	-4.62	-1.57							-3.25	-3.79	-2.94	-1.7	-1.44	0.568	-1.44
-3.36	-1.29	-4.21	-2.95	-2.2	-4.55	-5.75	-1.32							-3.81	-4.79	-2.46	-1.44	-1.35	0.465	-1.48
-3.13	-2.24	-3.86	-3.68	-1.87	-4.57	-5.4	-1.55							-3.89	-4.85	-2.43	-2.31	-1.74	-1.32	-2.39
-3.95	-2.2	-3.67	-4.15	-1.49	-3.96	-5.4	-1.57							-3.27	-5.3	-2.75	-2.3	-1.86	-1.19	-1.71
-4.87	-1.48	-4.06	-3.64	-2.52	-4.18	-4.5	-1.29							-3	-5.4	-1.76	-2.08	-0.984	-0.635	-2.37
-4.9	-1.42	-3.9	-3.58	-2.09	-4.46	-4.78	-1.04							-3.51	-3.5	-2.59	-2.12	-1.7	0.574	-2.59
-4.26	-1.75	-4.19	-3.57	-2.87	-3.52	-4.66	-1.65							-3.86	-3.51	-2.32	-2.19	-2.05	0.911	-1.75
-3.82	-2.65	-4.59	-3.69	-2.27	-4.36	-4.34	-1.26							-2.85	-3.76	-2.72	-3.3	-1.36	0.209	-2.19
-4.43	-3.16	-4.88	-4.15	-2.58	-4.12	-6.22	-1.01							-3.53	-3.71	-2.66	-2.44	-1.75	0.519	-2.56
-4.47	-2.43	-5.03	-3.91	-2.45	-3.64	-5.98	-0.552							-4.27	-3.26	-2.61	-2.4	-2.01	-0.323	-1.91
-4.38	-1.89	-5.24	-4.36	-2.43	-1.84	-5.72	-1.12							-3.94	-3.24	-2.76	-2.11	-2.16	0.358	-0.733
-4.24	-2.2	-4.46	-4.07	-1.85	-2.99	-5.42	-0.571							-4.29	-2.63	-2.73	-2.24	-1.4	-1.21	-0.624
-2.86	-1.56	-4.87	-3.9	-2.3	-3.95	-5.9	-0.773							-4.41	-4.04	-2.41	-1.8	-2.42	-0.41	0.054
-2.06	-2.77	-4.43	-4.17	-3.03	-3.43	-5.95	-0.805							-4.2	-3.56	-2.42	-2.05	-2.69	-0.33	-0.471
-2.02	-2.14	-4.82	-3.14	-3.07	-4.3	-5.79	-1.09							-3.52	-4.08	-2.86	-2.34	-2.54	-0.498	-0.852
-1.99	-1.99	-5.05	-4.34	-2.76	-5.06	-5.54	-1.17							-3.39	-3.98	-2.67	-2.58	-2.18	-0.0614	-0.766
-2.93	-2.32	-5.38	-3.94	-2.85	-3.35	-5.78	-0.984							-3.39	-3.43	-2.88	-2.21	-2.35	-1.33	-0.866
-2.97	-2.35	-4.76	-3.88	-3.38	-3	-5.15	-1.23							-3.5	-3.78	-2.85	-2.15	-1.9	-1.67	-1.3
-3.39	-1.81	-4.66	-4.24	-3.33	-2.26	-4.6	-2.25							-3.03	-4.6	-2.57	-1.52	-0.88	-2.96	-0.714
-3.84	-1.66	-5.02	-3.13	-3.12	-4.16	-6.15	-1.66							-3.13	-2.06	-2.46	-1.71	-0.789	-2.66	-0.605
-3.45	-2.08	-4.62	-3.07	-3.67	-4.41	-4.54	-1.53							-2.31	-4.22	-2.68	-1.54	-1.05	-1.82	-1.06
-3.73	-1.38	-4.01	-3.22	-2.65	-3.81	-5.42	-1.24							-3.09	-4.35	-2.27	-1.84	-0.435	-0.0574	-2.21
-3.73	-0.864	-5.3	-3.48	-1.46	-2.59	-5.7	-0.767							-2.76	-4.13	-2.49	-2.17	-0.956	1.28	-1.09
-4.14	-0.854	-4.8	-3.66	-2.25	-3.82	-5.73	0.0491							-3.1	-2.59	-2.7	-1.94	-1.32	-0.606	-1.03
-4.46	-0.744	-5.58	-4.22	-3.06	-4.56	-4.53	-0.0822							-3.82	-2.41	-2.48	-2.23	-1.67	-0.0649	-0.0462
-3.86	-0.13	-5.62	-3.2	-2.97	-4.17	-4.32	-0.949							-3.71	-3.81	-2.56	-1.94	-1.51	-1.16	-1.01
-2.87	-1.7	-5.07	-3.3	-3.13	-4.93	-4.66	-1.12							-2.63	-4.08	-2.59	-1.71	-1.37	-1.7	-1.42
-3.31	-1.72	-5.84	-3.51	-2.37	-4.23	-4.19	-0.765							-3.25	-2.7	-3.25	-1.72	-0.552	-1.99	-1.02
-3.79	-0.838	-5.72	-3.01	-2.42	-2.34	-4.84	-1.48							-3.12	-2.66	-2.81	-1.32	-0.658	0.0664	-1.1
-4.52	-2.1	-5.17	-2.78	-2.15	-2.58	-4.13	-1.06							-2.69	-3.52	-2.44	-1.72	-0.667	0.12	-1.29
-4.74	-1.56	-4.94	-3.45	-2.55	-3.79	-4.08	-1.59							-2.39	-3.54	-2.84	-1.57	-0.739	-1.28	-0.946
-4.79	-1.54	-4.59	-3.52	-3.46	-2.16	-4.11	-1.85							-3.13	-3.02	-2.74	-2.29	-1.85	-0.178	-1.23
-4.44	-0.933	-4.54	-3.26	-3.31	-1.19	-5.02	-1.37							-2.88	-3.31	-2.98	-2.43	-0.992	-1.78	-1.71
-3.71	-1.23	-5.3	-4.45	-3.7	-2.73	-3.63	-1.72							-2.54	-2.75	-2.63	-1.14	-1.46	-3.3	-2.49
-3.54	-1.1	-4.5	-3.61	-2.63	-2.43	-4.22	-1.75							-1.94	-3.27	-2.81	-1.79	-1.01	-1.34	-2.31
-3.57	-0.922	-4.71	-3.81	-3.19	-2.87	-4.6	-1.28							-1.34	-4.09	-2.55	-1.59	-0.616	-1.73	-2.66
-3.09	-1.21	-4.93	-3.89	-3.39	-3.2	-4.15	-1.45							-0.916	-4.26	-2.75	-2.1	-0.508	0.0962	-2.07
-3.72	-1.08	-4.88	-4.37	-3.49	-3.71	-3.99	-1.85							-1.35	-3.36	-2.09	-2.54	0.449	0.803	-2.8
-4.33	-1.85	-4.83	-4.81	-4.05	-3.75	-4	-1.16							-1.96	-3.11	-2.01	-1.85	0.524	-0.386	-2.59
-4.72	-1.06	-5.16	-3.47	-4.26	-3.17	-3.55	-1.52							-1.83	-3.6	-1.8	-2.48	-0.481	0.316	-1.88
-4.22	-0.903	-5.3	-3.81	-4.28	-2.86	-4.23	-1.46							-1.91	-3.75	-2.26	-1.53	0.0898	-1.65	-1.51
-4.18	-2.06	-5.38	-4.35	-4.17	-2.29	-4.18	-1.22							-2.86	-3.47	-2.03	-1.99	-0.444	-2.17	-2.78
-4.27	-2.6	-5.88	-4.06	-3.61	-3.05	-3.42	-1.38							-2.24	-3.2	-1.95	-1.49	-1.36	-1.92	-2.36
-4.13	-1.86	-5	-4.74	-3.71	-1.54	-4.16	-1.09							-2.81	-3.5	-2.21	-1.98	-0.59	-0.851	-2.19
-3.84	-1.55	-5.99	-4.29	-2.79	-1.65	-3.58	-1.29							-2.43	-2.63	-2.44	-1.98	-0.799	-0.944	-2.08
-4.18	-1.42	-5.71	-4.87	-2.92	-2.6	-4.21	-1.51							-2.59	-3.41	-2.06	-2.01	-0.744	-0.164	-2.04
-4.25	-1.68	-5.82	-4.85	-3.21	-1.84	-4.17	-1.44							-2.33	-4.51	-2.05	-1.86	-0.452	-0.422	-2.01
-4.25	-1.13	-4.91	-4.3	-3.41	-1.9	-4.15	-1.42							-2.34	-3.71	-2.06	-1.61	-0.764	-2.12	-1.48
-4.09	-2.34	-5.39	-4.11	-3.19	-3.77	-4.26	-1.7							-1.05	-3.66	-1.93	-1.68	-1.47	-2.27	-1.94
-3.39	-1.72	-5.73	-4.93	-2.86	-3.81	-5.02	-1.63							-1.82	-3.46	-1.59	-2.22	-0.689	-0.28	-1.54
-3.27	-1.98	-5.52	-4.07	-3.7	-2.46	-4.88	-1.77							-1.49	-3.21	-2.18	-2	-1.38	-0.133	-1.38
-3.5	-2.47	-5.45	-4.4	-4	-3.18	-5.07	-1.38							-2.94	-1.8	-2.2	-2.53	-0.588	-0.555	-1.81
-3.34	-2.56	-5.5	-3.99	-3.68	-3.54	-3.99	-1.88							-3.04	-2.88	-1.97	-2.32	0.045	-0.531	-2.47
-3.82	-2.88	-6.3	-4.56	-3.65	-3.04	-5.01	-1.75							-4.81	-2.83	-1.7	-2.53	-0.429	-1.04	-3.64
-3.86	-1.92	-6.58	-4.52	-3.55	-3.28	-3.93	-2.28							-3.57	-2.38	-2.27	-2.39	0.219	-1.13	-3.31
-3.61	-1.95	-5.77	-4.29	-3.92	-3.98	-3.92	-2.38							-2.24	-3.57	-2.17	-2.67	-1.12	-1.01	-2.63
-3.28	-2.88	-5.64	-4.09	-2.96	-4.53	-4.46	-2.5							-2.51	-3.01	-2.13	-2.24	-0.786	-0.815	-3.22
-3.69	-3.45	-6.19	-3.91	-3.39	-3.59	-4.71	-2.37							-2.22	-2.94	-2.34	-2.08	-0.984	-0.751	-3.9
-3.91	-2.39	-5.87	-4.42	-2.97	-3.1	-3.73	-2.13							-3.42	-2.95	-2.51	-2.21	-1.04	0.287	-2.72
-4.22	-2.21	-6	-4.4	-3.28	-4.54	-4	-2.04							-4.52	-3.39	-2.36	-2.21	-0.935	0.832	-2.65
-4.19	-2.23	-5.45	-4.28	-2.97	-3.11	-3.47	-2.13							-4.11	-2.49	-2.06	-2	-0.696	-0.247	-3.02
-3.35	-2.21	-5.99	-4.39	-3	-3.61	-4.25	-2.51							-3.28	-2.73	-1.82	-1.97	-0.343	-0.23	-1.85
-3.33	-2.61	-6.07	-3.71	-2.66	-3	-4.77	-2.35							-1.64	-3.1	-2.11	-2.91	-0.643	0.123	-2.59
-3.46	-2.44	-5.84	-4.13	-3.25	-3.61	-3.21	-1.9							-2.1	-3.15	-2.19	-1.75	-0.861	1.49	-2.73
-3.58	-1.42	-6.13	-4.23	-2.99	-3.73	-3.32	-2.3							-1.94	-3.1	-1.82	-2.1	-1.45	1.12	-3.06
-3.9	-2.44	-6.32	-3.71	-3.51	-4.36	-3.05	-2.05							-1.47	-3.04	-2.09	-2.36	-1.03	0.251	-3.48
-3.95	-2.74	-5.48	-3.64	-2.89	-3.88	-3.34	-2.22							-1.41	-3.62	-2.44	-1.7	-1.71	0.105	-2.9
-3.76	-2.71	-5.07	-3.7	-3.15	-4.25	-3.98	-2.51							-2.87	-2.9	-2.19	-2.47	-1.72	0.975	-3.06
-3.94	-1.67	-5.57	-3.26	-2.78	-5.06	-4.08	-3.55							-2.56	-3.81	-2.23	-1.45	-0.21	-1.3	-3.31
-3.94	-3.02	-6.11	-4.09	-2.34	-5.6	-3.98	-3.51							-3.09	-3.75	-2.31	-2.41	0.291	-0.479	-2.78
-4.54	-1.89	-5.07	-4.16	-1.85	-4.19	-3.79	-3.05							-2.58	-4.06	-1.86	-1.6	-0.137	0.118	-3.77
-4.69	-1.9	-4.85	-4.36	-2.73	-5.06	-3.45	-2.59							-3	-3.44	-2.84	-1.73	-1.44	0.514	-4.17
-4.84	-2.93	-4.97	-4.25	-2.46	-4.16	-4.59	-2.36							-2.35	-3.7	-2.62	-2.25	-1.85	0.308	-3.2
-5.05	-2.32	-5.25	-2.55	-2.6	-3.53	-5.5	-2.28							-1.67	-3.13	-2.6	-2.07	-1.76	-0.574	-4.12
-4.85	-1.8	-5.44	-3.22	-1.86	-3.9	-4.25	-2.93							-2.93	-3	-2.41	-1.84	-1.64	0.0353	-3.66
-4.81	-2.55	-4.96	-3.62	-1.19	-3.87	-4.47	-2.63							-3.69	-2.94	-2.18	-1.35	-2.07	-0.265	-1.71
-4.67	-2.37	-6.07	-4.66	-1.04	-5.23	-3.85	-2.77							-3.37	-3.43	-2.17	-1.49	-1.85	-0.817	-2.12
-4.48	-1.44	-4.93	-4.11	-1.78	-4.27	-4.88	-2.33							-4.07	-2.63	-2.48	-2.1	-1.19	-0.149	-2.64
-3.27	-2.06	-5.41	-3.82	-1.4	-4.01	-4.46	-2.74							-3.17	-3.89	-2.16	-1.69	-0.636	0.114	-1.56
-3.55	-1.66	-5.39	-3.48	-1.03	-4.64	-4.38	-4.04							-3.86	-4.54	-2.59	-2.24	-1.05	0.606	-2.41
-3.41	-2.47	-5.27	-3.15	-1.02	-3.55	-4.57	-3.43							-3.19	-4.18	-1.86	-2.47	-1.03	-0.238	-1.81
-3.27	-2.54	-5.52	-3.72	-0.839	-2.99	-3.17	-3.84							-2.1	-3.64	-1.86	-1.96	-1.86	0.245	-2.23
-3.93	-2.2	-4.85	-3.67	-1.26	-2.43	-3.98	-3.59							-3.09	-3.14	-1.48	-1.8	-1.77	-1.19	-3.08
-3.49	-3.94	-5.31	-4.28	-1.97	-3.4	-4.02	-3.58							-2.19	-3.74	-1.69	-2.19	-2.14	-0.0119	-2.26
-3.05	-2.71	-5.09	-3.93	-1.64	-3.79	-3.97	-2.96							-2.17	-5.12	-1.88	-2.63	-2.48	0.203	-2.13
-3.78	-1.82	-5.65	-4.03	-1.82	-2.94	-4.13	-2.2							-1.99	-3.98	-1.9	-2.67	-1.14	-0.601	-2.53
-4.15	-2.02	-5.05	-2.21	-1.35	-3.91	-4.57	-1.97							-2.34	-4.03	-1.77	-2.46	-0.984	-1.97	-2.92
-3.68	-2.1	-5.34	-2.75	-1.33	-4.47	-3.96	-2.21							-2.59	-3.96	-2.37	-1.95	0.0877	-0.206	-4.59
-3.75	-3.13	-5.67	-2.58	-1.86	-4.21	-4.54	-2.07							-2.06	-4.66	-2.09	-2.8	-0.403	0.619	-3.68
-4.21	-2.55	-5.04	-3.48	-2.34	-4.22	-4.62	-2.86							-1.94	-3.62	-2.14	-2.69	-0.167	-0.533	-3.4
-4.31	-2.69	-5.41	-3.46	-2.08	-4.51	-3.21	-2.64							-2.86	-4.88	-2.43	-2.51	-0.615	0.0735	-2.21
-3.99	-2.41	-5.41	-3.7	-1.88	-4.83	-4.19	-2.52							-2.98	-4.92	-2.48	-2.38	-0.615	-0.293	-1.37
-4.22	-0.752	-5.47	-3.96	-2.24	-5.86	-3.51	-3.06							-1.97	-4.71	-2.35	-2.4	-1.81	-0.356	0.119
-4.69	-1.59	-5.39	-3.43	-2.4	-3.24	-4.3	-2.7							-3.27	-4.56	-1.95	-2.01	-1.83	-0.262	2.09
-4.87	-2.71	-5.71	-3.56	-2.94	-4.24	-4.25	-2.54							-2.89	-4.78	-2.28	-2.07	-0.653	-0.0774	0.567
-4.86	-2.46	-5.26	-4.46	-2.27	-3.57	-3.7	-2.68							-2.63	-4.49	-2.32	-2.26	0.88	-0.0607	0.853
-4.22	-3.11	-5.36	-4.12	-3.03	-3.6	-4.36	-2.73							-3.72	-4.58	-2.08	-2.45	1	-0.933	0.309
-4.05	-3.17	-4.96	-4.21	-2.73	-5.12	-3.59	-2.37							-3.46	-3.8	-2.07	-2.27	0.848	-1.64	-0.101
-3.78	-2.37	-6.11	-3.17	-3.48	-6.17	-4.43	-2.82							-2.96	-4.54	-2.09	-2.47	-0.216	-2.77	-0.126
-4.33	-2.32	-6.03	-4.13	-2.3	-5.23	-3.65	-2.4							-2.21	-4.52	-2.19	-2.26	0.142	-2.31	0.113
-5	-1.81	-5.17	-3.73	-3.22	-4.62	-3.58	-1.81							-2.15	-5.37	-1.95	-2.52	-1.46	-1.85	-0.738
-4.75	-3.26	-5.51	-5.05	-3.64	-4.46	-3.75	-1.95							-2.42	-4.59	-2.36	-2.18	-0.38	-1.09	0.306
-4.74	-2.5	-5.89	-4.78	-3.03	-4.25	-4.98	-2.2							-3.13	-4.57	-2.63	-2.29	-1.01	0.079	-0.948
-4.63	-2.72	-5.51	-3.78	-4.27	-4.28	-3.3	-1.89							-3.44	-3.82	-2.32	-2.03	-1.31	-0.603	-1.52
-4.59	-2.11	-6.37	-4.6	-3.27	-5	-3.73	-2.56							-3.04	-5	-2.78	-2.29	-0.121	-0.0563	-0.474
-4.27	-2.72	-5.56	-4.61	-3.81	-5.61	-3.66	-2.91							-1.83	-3.95	-2.3	-2.88	-1.5	-0.183	-1.8
-3.81	-1.82	-4.82	-4.46	-3.45	-5.96	-4.18	-2.71							-2.66	-4.15	-2.71	-2.49	-1.16	-0.771	-1.51
-4.35	-2.19	-4.84	-4	-3.93	-6.77	-3.9	-3.33							-2.88	-4.51	-2.5	-2.17	-1.1	-1.1	-1.53
-4.58	-1.96	-5.05	-3.98	-2.95	-5.64	-3.7	-3							-3.14	-4.26	-2.37	-2.42	-1.49	1.33	-1.89
-4.9	-3.23	-5.53	-4.22	-3.38	-4.15	-4.64	-3.34							-4.07	-3.19	-3.09	-2.58	-0.19	0.0055	-0.697
-4.75	-2.87	-5.1	-3.5	-3.29	-5.82	-3.51	-3.34							-3.59	-3.83	-3.59	-2.83	-0.769	-0.622	-1.85
-4.12	-3.6	-5.54	-3.11	-3.84	-4.71	-3.86	-3.44							-2.49	-4.28	-2.86	-2.06	0.215	-0.408	-2.05
-3.9	-2.7	-5.14	-3.26	-3.7	-5.29	-3.65	-4.18							-2.49	-4.81	-3.09	-2.52	-0.582	-0.862	-2.18
-3.93	-3.35	-5.5	-4.83	-2.76	-5.07	-2.45	-3.78							-2.67	-4.01	-3.09	-2.23	-1.1	-0.75	-1.49
-4.08	-2.66	-5.31	-4.79	-2.35	-5.8	-3.89	-3.53							-1.92	-4.43	-2.62	-2.52	-1.45	-0.253	-1.92
-4.56	-3.89	-5.24	-3.96	-1.99	-3.97	-3.49	-2.99							-1.56	-4.06	-2.87	-1.83	-1.35	0.785	-1.46
