# Supplementary material for: Metabolic sensing in AgRP neurons integrates homeostatic state with dopamine signalling in the striatum
Source: eLife journal article supplement (doi:10.7554/elife.72668), 2022-01-12
Supplement: fig1-data1 [file Fig1N.xlsx]

## Sheet: Sheet1
	Agrp GCamp														Agrp Crat
-60 to -10	-0.0026202	-0.0013881	0.00334297	-0.0034933	0.00341113	-0.0005084	0.00255517	-0.0017145							0.00114881	-0.0022372	-0.0004902	-0.002486	0.00824411	0.00132495	-0.0032139
-10 to 0	-2.20971	-1.98975	-0.0862024	-1.65736	0.874315	-0.686845	-0.928243	-1.14764							-0.725924	-0.882827	-0.752285	-0.628358	-0.524796	0.117758	-1.67906
0 to10	-4.73466	-3.67951	-3.28437	-3.92621	-1.67884	-4.70839	-3.64729	-3.26243							-2.96495	-1.46001	-2.04717	-1.31745	-3.02204	-0.32609	-3.44215
10 to 30	-6.02098	-3.0463	-4.6342	-4.33088	-2.17724	-7.51893	-5.12141	-3.21521							-3.79483	-3.13952	-2.46712	-1.92586	-2.37133	-0.489737	-3.19413
10 to 60	-4.94031	-2.86909	-5.05522	-4.11808	-2.3431	-5.94482	-4.77276	-2.06818							-3.31776	-3.603	-2.20715	-1.95535	-1.63216	-0.446136	-2.34342
