# Supplementary material for: Metabolic sensing in AgRP neurons integrates homeostatic state with dopamine signalling in the striatum
Source: eLife journal article supplement (doi:10.7554/elife.72668), 2022-01-12
Supplement: fig1-data1 [file Fig1O.xlsx]

## Sheet: Sheet1
	WT														KO
fed	-2.64124	-1.27222	-4.0358	-3.04925	-4.86016	-5.92682	-3.70986	-3.51361	-2.13972	-6.61557	-1.8242	-1.78427	-4.72375	-7.18221	-2.761	-2.57769	-1.40284	-0.951494	-1.87063	0.0628374	-2.4026	-1.39925	-0.510776	-1.69957	-2.89509	-1.8867
fast	-4.94031	-2.86909	-5.05522	-4.11808	-2.3431	-5.94482	-4.77276	-2.06818							-3.31776	-3.603	-2.20715	-1.95535	-1.63216	-0.446136	-2.34342
