# Supplementary material for: Metabolic sensing in AgRP neurons integrates homeostatic state with dopamine signalling in the striatum
Source: eLife journal article supplement (doi:10.7554/elife.72668), 2022-01-12
Supplement: fig1-figsupp1-data1 [file elife-72668-fig1-figsupp1-data1-v2.zip]

## Sheet: Sheet1
WT fed						WT fast
-1.11	2.63	-0.504	-0.617	-1.11		-0.737	-0.44	-1.22	-0.291	-1.21
-0.84	1.71	-1.09	-0.797	-1.18		-0.0245	-0.744	-1.4	-0.0479	-1.17
-0.439	1.98	1.35	-0.748	-1.32		-0.107	-0.1	-0.945	0.0476	-1.46
-0.735	1.1	1.03	-0.644	-1.26		0.353	-0.399	-0.732	0.0663	-1.11
-0.698	1.97	0.154	-0.376	-1.12		0.267	-0.205	-1.06	0.0251	-1.6
-0.809	1.16	-0.025	-0.425	-1.23		-0.185	0.43	-1.17	0.0589	-1.8
-0.788	1.9	0.331	-0.712	-1.1		-0.45	-0.343	-1.18	0.0702	-1.5
-0.879	1.38	-0.254	-1.15	-1.01		-0.489	-0.724	-1.45	0.0338	-1.99
-0.418	2.03	-0.218	-0.57	-1.11		-0.396	0.282	-1.43	0.174	-1.99
-0.146	2.18	1.37	-1.13	-1.22		-0.504	-0.189	-1.28	-0.0141	-1.77
-0.224	1.21	0.0573	-1.73	-1.14		-0.225	0.208	-1.81	0.00652	-1.57
-0.0536	1.09	0.202	-1.11	-1.1		-0.274	0.382	-1.26	-0.203	-1.47
0.225	0.844	-0.545	-0.308	-1.04		0.204	1.39	-1.53	0.237	-1.6
0.652	0.989	-1.88	-0.0264	-1.16		-0.611	1.35	-1.57	0.218	-1.4
0.46	0.828	0.248	-0.804	-0.989		-1.18	1.35	-1.1	0.154	-1.18
0.588	0.363	-0.253	-0.62	-0.95		-0.925	0.624	-1.16	0.154	-1.46
0.326	0.551	-1.66	-0.313	-1.1		-0.974	0.539	-0.762	-0.115	-1.4
0.504	0.517	-1.48	-0.58	-1.27		-0.63	1.18	-0.816	0.146	-1.68
0.517	1.26	-1.01	-0.722	-1.33		-1.03	0.00245	-0.527	0.128	-1.5
0.208	0.134	-1.02	-1.33	-1.22		-1.25	0.389	-0.662	0.587	-1.83
0.512	0.69	0.115	-1.19	-1.14		-1.05	-0.0277	-0.81	0.77	-1.66
0.341	1.25	-0.75	-0.839	-1.09		-0.667	0.88	-0.626	0.594	-1.42
0.152	0.659	0.653	-1.17	-0.911		-0.102	0.589	-0.49	0.911	-1
0.249	1.57	-0.148	-1.12	-1.09		-0.29	0.0123	-0.781	0.872	-0.908
0.427	1.18	-0.851	-1.76	-1.4		0.265	0.194	-1.04	0.943	-0.883
0.55	1.67	0.466	-1.31	-1.47		0.124	0.552	-0.773	0.926	-1.14
0.448	1.88	0.283	-1.12	-1.38		0.366	0.695	-1.01	0.835	-0.804
0.173	1.51	1.52	-0.674	-1.22		0.18	0.587	-0.8	0.547	-1.15
-0.0555	1.76	1.71	-1.18	-1.42		0.0434	0.7	-0.917	0.478	-1.42
0.0569	1.44	0.529	-0.812	-1.55		0.0145	0.803	-0.807	0.518	-1.76
0.653	1.35	0.583	-0.811	-1.76		0.173	0.682	-0.613	0.485	-1.57
0.787	1.11	1.22	-0.667	-1.8		0.668	0.665	-0.605	0.289	-1.24
0.772	0.959	1.55	-0.719	-1.37		1.86	-0.441	-1.04	0.32	-0.557
0.542	1.42	1.29	-1.12	-1.29		2.15	0.111	-0.745	-0.07	-0.265
0.476	1.27	0.514	-1.17	-1.1		2.4	0.667	-0.826	-0.123	-0.613
0.726	1.21	2.44	-0.891	-0.946		1.37	1.44	-0.78	-0.339	0.0729
0.387	1.18	2.26	-0.998	-0.809		1.14	-0.388	-0.973	-0.147	-0.161
0.215	0.747	2.05	-1.07	-0.699		1.1	-0.598	-1.03	-0.602	-0.396
0.537	0.426	1.92	-1.37	-0.56		1	0.881	-1.15	-0.896	-0.27
0.405	0.793	0.998	-1.12	-0.555		1.16	0.279	-0.881	-0.484	-0.111
0.578	0.562	0.8	-0.887	-0.682		1.1	1.02	-0.719	-0.477	-0.516
0.526	0.332	0.636	-1.18	-0.873		1.1	0.622	-0.832	-0.497	-0.779
0.398	0.648	0.641	-0.276	-0.794		0.971	0.788	-0.804	-0.737	-0.313
0.165	0.73	0.725	-0.563	-0.859		0.536	1.35	-1.04	-0.924	-0.657
0.659	-0.105	0.537	-1.08	-0.694		0.48	-1.23	-0.921	-0.796	-0.665
0.242	0.811	-0.45	-0.669	-0.934		1.15	0.573	-0.777	-0.795	-0.329
0.239	0.584	0.589	-0.896	-0.954		1.53	-0.0537	-0.938	-0.895	-0.0491
0.409	0.432	1.28	-1.04	-0.997		1.97	0.928	-1.09	-1.11	-0.404
0.391	0.576	-0.0674	-1.12	-0.935		2.19	0.254	-0.877	-0.759	-0.105
0.356	0.885	1.56	-1.51	-0.997		2.64	0.0121	-0.691	-0.727	-0.209
0.317	0.118	2.25	-1.3	-0.997		2.65	0.457	-0.936	-0.373	-0.138
0.291	0.0262	0.43	-1.09	-1.02		3.32	1.19	-0.784	-0.29	-0.497
0.615	0.559	0.304	-1.26	-1.07		3.39	0.308	-0.982	-0.227	-0.0485
0.36	-0.145	0.248	-1.69	-1.08		3.39	0.627	-1.29	-0.386	-0.154
0.282	-0.605	2.42	-1.45	-1.05		2.97	0.594	-1.67	-0.178	-0.736
0.372	-1.34	0.156	-0.995	-0.865		2.86	0.536	-1.38	-0.346	-0.573
0.14	-1.3	1.85	-1.42	-1.12		2.54	0.397	-1.31	-0.189	-0.398
0.189	-0.527	1.51	-1.82	-1.09		2.61	0.011	-1.15	-0.0712	-0.243
0.0606	-0.863	2.47	-2.22	-1.26		2.43	-0.256	-0.943	-0.296	-0.13
0.599	-0.346	2.92	-0.958	-1.34		2.56	0.674	-0.937	-0.44	-0.00344
0.683	0.977	1.17	-1.31	-1.29		2.25	0.199	-1.22	-0.0891	0.0798
0.804	0.917	0.14	-1.34	-1.1		2.14	0.643	-1.09	-0.443	0.197
0.299	0.467	0.944	-1.62	-1.08		2.1	-0.162	-1.08	-0.37	-0.0806
0.206	0.367	0.54	-1.44	-1.05		1.72	-0.303	-1.44	-0.392	0.0706
0.288	-0.756	0.613	-1.41	-1.09		1.84	0.157	-1.36	-0.94	0.151
0.289	-1.4	0.0455	-1.08	-1.32		1.55	0.0453	-1.32	-0.505	0.452
0.156	-0.297	-0.15	-1.58	-1.25		1.29	-0.0856	-1.31	-0.785	0.209
0.441	-0.236	-0.492	-1.2	-1.45		1.18	-0.154	-1.38	-0.62	0.206
0.541	-0.0135	-0.775	-1.27	-1.49		0.776	-0.255	-1.36	-0.793	0.247
0.594	0.708	-0.359	-0.736	-1.4		0.964	-0.227	-1.41	-0.576	0.78
0.778	0.0584	0.78	-1.01	-1.31		0.659	0.852	-2.08	-0.152	0.744
0.713	0.311	0.783	-1.58	-1.38		0.57	0.0731	-1.95	-0.259	1.02
0.508	0.709	0.0258	-1.07	-1.4		0.684	-0.0284	-2.05	-0.55	0.392
0.89	0.153	0.158	-0.887	-1.35		0.812	-0.317	-1.78	-0.274	0.559
0.747	-0.788	-0.684	-0.758	-1.14		0.809	0.328	-1.89	-0.122	0.88
0.511	-1.02	-0.539	-0.24	-1.23		0.931	-0.39	-2.38	-0.106	0.904
0.384	-1.3	0.485	-1.01	-1.1		0.958	0.29	-2.75	-0.141	0.92
0.257	-1.32	-0.814	-1.36	-1.07		0.713	-0.299	-2.24	-0.0795	0.604
0.373	-0.745	-0.281	-0.882	-1.09		0.679	1.25	-1.72	-0.216	0.592
0.0442	-0.321	0.219	-1.29	-1.16		0.968	0.377	-1.77	-0.156	0.65
0.134	-0.596	0.513	-0.542	-1.14		0.407	-0.288	-1.68	-0.432	0.664
0.583	-0.642	0.778	-1.23	-1.34		0.67	-0.443	-1.63	-0.587	0.814
0.342	-0.579	-0.016	-0.488	-1.22		1.02	-0.0724	-1.66	-0.218	0.622
0.634	-0.234	-0.125	-0.681	-1.12		1.27	-0.135	-1.65	-0.0724	0.784
0.336	-0.369	0.264	-1.1	-1.04		0.783	-0.262	-1.54	-0.493	0.292
0.233	-0.326	-1.18	0.0536	-0.949		0.661	-0.614	-1.51	-0.241	0.663
0.221	-0.707	-1.91	-0.115	-0.659		0.845	0.197	-1.61	-0.375	0.399
0.316	-0.834	-0.769	-0.0978	-0.0538		0.476	-0.405	-1.27	-0.461	-0.0245
0.397	-0.105	-0.137	-0.738	-0.295		0.872	-0.0578	-1.46	-0.763	0.733
0.943	-0.211	-0.261	-0.595	-0.215		0.985	-0.582	-1.41	-0.325	0.752
0.652	-0.292	0.656	-0.692	-0.271		1.16	0.0979	-1.46	-0.459	0.486
0.661	-0.0928	0.684	-0.646	-0.276		0.916	-0.592	-1.02	-0.514	-0.321
0.805	-0.298	0.554	-0.913	-0.17		1.16	-0.124	-1.46	-0.466	-0.407
1.03	-0.511	0.808	-1.05	-0.162		0.932	-0.764	-1.35	-0.633	-0.201
0.453	-0.415	0.856	-0.603	-0.337		1.37	-0.155	-1.1	-0.582	-0.0333
0.419	-0.418	0.608	-0.0189	-0.264		1.44	0.607	-1.52	-0.754	-0.424
0.465	-0.733	0.546	-0.432	-0.227		1.33	-0.532	-1.75	-0.737	-0.347
0.483	-0.8	0.0586	-0.0577	-0.191		1.04	-0.613	-1.37	-0.806	-0.537
0.0547	-0.709	0.321	0.418	-0.0764		1.1	-0.435	-1.76	-0.831	0.0548
0.0789	-0.435	0.448	-0.17	-0.00987		0.607	-0.0862	-1.13	-0.722	0.171
0.018	-0.342	0.0514	0.134	-0.0643		0.647	-0.242	-1.31	-0.146	0.561
-0.252	-0.717	0.0411	-0.186	0.0743		0.669	-0.766	-1.29	-0.105	0.766
-0.178	-0.15	0.532	0.00516	0.163		0.0847	-0.00305	-0.945	0.108	0.299
-0.267	-0.469	0.47	0.0625	-0.0543		0.397	-0.486	-1.08	-0.194	0.0022
-0.176	-1.12	0.269	-0.0629	-0.18		0.558	-0.329	-1	-0.212	-0.314
-0.179	-1.33	1.61	-0.0192	-0.422		0.191	0.811	-1.12	-0.216	-0.392
-0.232	-1.45	0.163	-0.0951	-0.543		0.372	-1.46	-1.05	-0.166	-0.388
0.221	-1.11	-0.547	-0.409	-0.478		0.0904	-0.385	-1.42	-0.12	-0.189
0.553	-1.71	-0.0778	0.125	-0.556		0.295	-0.504	-1.57	0.00227	0.363
0.557	-1.17	0.339	0.109	-0.472		0.348	0.399	-1.56	-0.511	0.0522
1.09	-1.54	0.564	-0.129	-0.534		1.16	-0.483	-1.21	-0.63	0.621
0.881	-1.08	1.09	0.122	-0.733		2.57	-0.257	-1.67	-0.416	0.223
0.435	-0.947	1.54	-0.715	-0.621		3.57	-1.41	-1.78	-0.281	-0.163
0.426	-0.851	0.524	-0.362	-0.838		4.23	-0.631	-2.03	-0.642	-0.165
0.411	-1.15	0.726	-1.17	-0.992		4.36	-0.00285	-1.57	-0.649	-0.709
0.761	-1.49	1.56	-0.682	-0.987		4.1	0.208	-1.18	-0.435	-0.599
0.357	-0.896	2.17	-0.379	-0.962		3.89	0.0347	-1.41	-0.287	-0.273
0.0719	-1.62	0.265	-0.491	-1.02		3.85	-1.45	-1.47	-0.519	0.126
0.309	-1.37	1.47	-0.209	-0.953		3.44	-1.42	-1.71	-0.00279	-0.554
0.599	-1.71	0.532	-0.329	-1.18		2.69	-0.659	-1.79	0.111	-0.897
0.639	-1.71	1.48	-0.148	-1.05		2.86	0.759	-1.62	-0.112	-0.697
0.745	-0.938	0.865	-0.424	-1.16		2.78	-0.274	-1.46	-0.118	-0.512
0.547	-1.56	0.734	-0.165	-0.798		2.29	-0.767	-1.35	-0.08	-0.789
0.655	-1.41	1.44	-0.17	-0.827		2.25	-0.264	-1.69	-0.397	-1.18
0.706	-1.88	1.47	-0.698	-0.808		2.51	0.19	-1.25	-0.218	-1.25
0.346	-1.08	2.24	-0.915	-0.838		1.87	-1.24	-1.66	-0.614	-0.667
0.309	-0.0392	1.62	-0.746	-0.875		2.59	-0.527	-1.25	-0.253	-0.786
0.37	-1.21	2.23	-0.703	-0.807		2.19	-0.689	-1.48	-0.489	-1.36
0.271	-1.1	1.13	-0.591	-1.01		1.98	-0.249	-1.57	-0.0603	-1.53
0.514	-0.388	-0.546	-0.251	-1.18		1.99	-1.74	-1.76	-0.606	-1.46
0.00503	0.809	0.489	-0.733	-1.05		1.82	0.156	-1.64	-0.55	-1.49
0.151	-0.298	2.09	-0.581	-1.23		1.48	0.319	-1.63	-0.46	-0.536
-0.173	-0.819	1.5	-0.223	-1.39		1.42	-0.344	-1.58	-0.857	-0.314
0.0517	-0.478	0.627	0.129	-1.25		1.02	-0.723	-1.31	-0.877	-0.461
-0.0939	-0.305	0.14	-0.553	-1.24		0.912	0.159	-1.59	-0.862	-0.643
0.189	-0.358	2.17	-0.21	-1.3		0.886	0.516	-1.43	-0.893	-0.956
0.0318	0.616	1.68	-0.454	-1.5		1.01	-1.02	-1.59	-0.7	-0.624
0.201	0.56	0.97	-0.598	-1.62		1.29	-1.36	-1.47	-0.395	-0.719
0.102	0.75	1.71	-0.0121	-1.31		2.14	-2.47	-1.52	-0.496	-0.128
0.148	0.208	1.49	-0.572	-1.23		1.08	-0.392	-1.48	-0.46	-0.464
0.138	0.345	2.46	-0.00971	-1.16		1.61	0.489	-1.48	-0.22	0.0592
-0.0355	0.538	1.74	0.763	-1.04		1.97	-0.182	-1.62	-0.809	-0.326
0.392	-0.109	1.66	0.145	-1.13		1.99	-0.647	-1.86	-0.728	-0.403
0.144	0.104	1	-0.105	-1.29		1.7	-0.076	-1.85	-0.568	-0.11
-0.0368	-0.0968	1.24	-0.253	-1.47		1.65	-0.0552	-1.52	-0.197	-0.974
-0.269	0.142	1.6	0.212	-1.2		1.71	-1.4	-1.48	-0.923	-1.25
-0.19	-0.049	1.08	-0.0601	-1.01		2.08	-0.777	-1.35	-0.956	-1.36
-0.318	-0.417	1.65	-0.0906	-1.09		2.39	-0.648	-1.93	-0.853	-0.654
-0.0743	-0.0697	1.28	0.122	-1.06		2.22	0.161	-1.84	-0.595	-1.74
-0.0593	-0.211	0.353	0.0995	-1.1		1.9	0.18	-1.85	-0.828	-1.14
0.273	-0.261	1.17	0.364	-1.27		2.36	-0.096	-2.16	-0.781	-1.27
-0.00848	-0.702	1.23	0.0952	-1.3		2.45	-1.38	-1.81	-0.585	-0.746
-0.0292	-0.327	0.274	-0.128	-1.25		1.96	-1.57	-1.88	-0.496	-0.489
0.0417	-0.0593	1.51	0.304	-1.27		1.45	-1.08	-1.93	-0.396	-0.366
-0.149	-0.528	0.4	0.592	-1.5		1.87	-1.47	-1.9	-0.0562	-0.503
-0.0334	0.42	0.788	0.177	-1.55		1.42	-0.468	-2.11	-0.0605	-0.393
-0.141	0.146	0.82	0.00979	-1.47		1.08	-2.27	-2.26	-0.192	-0.16
-0.00256	0.984	0.871	-0.156	-1.41		1.47	-0.293	-1.77	-0.288	-0.299
-0.589	0.794	0.568	0.0456	-1.52		1.27	-2.04	-1.52	-0.205	0.00995
-0.127	0.801	1.53	-0.302	-1.53		1.45	-0.445	-1.69	-0.446	-0.234
0.453	0.964	-0.0158	0.079	-1.53		1.1	-0.605	-1.81	-0.27	-0.45
0.775	0.675	1.11	0.355	-1.57		1.15	-0.323	-1.57	-0.364	-0.447
0.85	0.814	-0.839	0.304	-1.7		1.12	-1.46	-1.25	-0.283	-0.513
0.924	0.47	-0.161	-0.135	-1.84		1.06	-0.247	-1.76	-0.529	-0.369
0.692	1.24	0.381	-0.417	-1.7		1.09	-1.04	-1.83	-0.835	-0.4
0.432	0.479	0.641	-0.429	-1.66		0.54	-1.15	-1.58	-0.574	-0.424
0.677	0.79	0.528	-0.452	-1.41		0.761	-1.36	-1.05	-0.329	-0.33
0.274	0.42	0.408	-0.383	-1.45		0.24	-1.04	-1.18	-0.103	-0.309
0.154	0.0935	-0.457	-0.181	-1.47		0.459	-1.09	-1.05	-0.263	-0.674
0.183	-0.232	-0.227	-0.227	-1.62		0.155	-1.21	-1.03	-0.274	-0.922
0.8	-0.334	0.177	-0.268	-1.43		-0.127	-0.108	-0.969	-0.18	-1.2
0.864	-0.106	-0.526	-0.174	-1.65		0.382	-0.949	-0.998	-0.498	-1.38
0.842	-0.212	0.223	-0.636	-1.89		0.0638	-0.846	-0.758	-0.23	-1.66
0.909	-0.0893	0.968	0.104	-1.84		0.164	-1.32	-0.983	-0.408	-1.37
0.642	-0.154	-0.0758	-0.27	-1.94		0.14	0.153	-0.524	-0.857	-1.15
0.238	-0.0743	0.532	-0.587	-1.67		0.48	-1.5	-0.309	-0.673	-1.43
0.0933	0.0668	-0.00671	-0.671	-1.76		0.582	-0.191	-0.656	-0.131	-1.21
0.0901	0.228	-1.37	-0.446	-1.79		0.883	-0.187	-0.654	0.144	-1.05
0.0735	-0.328	0.462	-0.789	-1.8		1.09	-1.21	-0.519	-0.271	-1.76
0.257	-0.729	-0.768	-0.584	-1.82		0.916	-1.43	-0.531	-0.0442	-1.89
0.247	-0.111	0.0423	-0.262	-1.94		1.1	-0.805	-0.679	-0.0279	-1.87
0.302	-0.0742	-1.04	-0.386	-1.63		0.79	-0.31	-0.356	-0.198	-1.38
0.121	-0.164	-0.272	-0.342	-1.43		0.614	0.289	-0.604	-0.386	-1.56
0.474	-1.54	-1.15	-0.788	-1.27		0.214	-0.12	-0.492	-0.558	-0.85
0.447	-0.435	-0.822	-0.281	-1.18		0.272	-0.472	-0.641	-0.429	-1.16
0.162	-0.269	0.387	-0.658	-1.39		0.168	-2.58	-0.516	-0.667	-1.17
0.402	-0.324	0.204	-0.703	-1.37		-0.16	-1.61	-0.68	-0.721	-1.25
0.446	-0.495	-0.0469	-0.957	-1.23		0.129	-0.499	-0.476	-0.646	-1.25
0.159	0.468	0.345	-1.19	-1.58		0.0448	-0.691	-0.467	-0.788	-1.49
0.185	0.314	0.905	-1.34	-1.44		0.0652	0.391	-0.59	-0.693	-1.13
-0.171	0.476	0.658	-1.64	-1.39		0.0938	-1.36	-0.908	-0.482	-1.14
-0.299	0.281	-0.0271	-1.48	-1.38		0.363	-0.0519	-0.899	-0.737	-1.29
0.0792	0.11	0.386	-1.58	-1.53		-0.182	-1.51	-0.933	-0.481	-1.35
0.0136	-0.145	0.414	-1.34	-1.52		-0.695	-1.06	-0.838	-1.05	-1.38
-0.0707	-0.228	-0.299	-0.89	-1.55		-0.0631	-0.653	-0.896	-0.649	-0.848
0.0589	-0.174	-0.476	-0.847	-1.73		0.165	-0.74	-0.526	-0.869	-1.27
0.0411	0.384	-0.903	-0.91	-1.97		-0.335	-1.11	-0.63	-0.458	-1.3
0.00586	-0.466	-1.03	-0.664	-1.88		-0.27	-1.42	-0.78	-0.525	-1.29
-0.0842	-0.195	-1.67	-1.3	-1.96		-0.872	0.303	-0.573	-0.7	-1.3
-0.0285	-0.0131	0.574	-1.37	-2		-0.549	-0.867	-0.491	-0.598	-1.57
0.0301	-1.13	0.427	-1.54	-1.76		-0.949	-1.21	-0.739	-0.836	-0.73
0.438	-0.932	-0.546	-0.765	-1.72		-0.653	-1.72	-0.674	-0.0429	-0.526
0.0714	-0.935	0.524	-0.684	-1.75		-0.768	-0.634	-0.634	-0.254	-0.272
-0.108	-0.763	0.607	-0.871	-1.81		-0.785	-0.246	-0.701	-0.25	-0.693
-0.183	-0.96	-0.632	-0.944	-1.83		-0.464	-1.5	-0.434	-0.319	-0.532
-0.00977	-1.24	-0.447	-0.707	-1.91		-0.362	0.00998	-0.166	-0.538	-0.58
-0.0109	-1.21	-1.16	-0.981	-1.96		-0.274	-0.793	-0.917	-0.611	-0.839
0.0564	-0.994	-1.14	-1.36	-2		-0.027	0.431	-0.999	-0.746	-0.837
-0.33	-0.425	-0.262	-0.639	-1.86		0.162	-0.703	-1	-0.983	-0.173
-0.406	-0.264	-0.0146	-0.144	-1.94		0.669	0.633	-1.32	-1.02	-0.313
-0.433	-0.24	0.0902	-0.516	-2		0.82	-1.03	-1.15	-0.827	-0.629
-0.338	0.0932	-0.704	-0.404	-2.11		1.02	-0.419	-1.2	-1.02	-0.341
-0.42	0.509	-0.397	-0.731	-2.06		0.847	-0.38	-1.24	-0.716	-0.165
-0.269	-0.634	-0.603	-0.455	-1.88		0.596	0.00548	-1.56	-0.783	-0.23
-0.253	-0.473	-0.0278	-0.252	-1.79		0.605	-0.44	-1.2	-1.06	-0.109
-0.0124	0.259	0.247	-0.433	-1.84		0.0612	-0.414	-0.779	-1.03	-0.0963
0.135	-1.09	1.19	-0.318	-1.68		0.0319	-0.274	-1.23	-0.791	-0.0556
-0.399	-0.412	-0.573	-0.728	-1.72		0.576	-0.201	-0.592	-0.392	-0.109
-0.181	0.458	0.745	-0.532	-1.85		0.376	-1.63	-0.702	-0.924	-0.117
-0.381	0.273	1.22	-0.435	-1.75		0.551	-0.673	-0.653	-1.06	-0.44
-0.571	-0.245	-0.0964	-0.484	-1.87		0.399	-0.699	-0.615	-1.09	0.463
-0.706	0.641	0.608	-0.258	-1.83		0.168	0.443	-0.792	-1.21	0.468
-0.941	1.27	-0.197	-0.702	-1.74		0.562	-1.82	-0.628	-0.915	0.844
-1.11	-0.0154	1.3	-1.1	-1.76		1.31	0.364	-0.285	-1.2	0.41
-0.642	0.093	-0.0871	-0.332	-1.85		0.911	0.0339	-0.796	-1.74	0.388
-0.416	-0.0214	-1.26	-0.0674	-1.79		0.674	-1.42	-0.824	-2.01	0.222
-0.717	0.0384	-0.285	0.23	-1.8		0.79	-0.529	-1.16	-1.77	1.16
-0.334	-0.498	0.719	0.0974	-1.82		0.154	-0.412	-1.26	-1.77	0.927
-0.448	-0.763	0.797	-0.214	-1.98		0.575	-0.699	-1.02	-1.62	0.492
-0.142	-0.689	0.452	-0.116	-1.98		0.511	-0.218	-0.939	-1.41	1.29
-0.381	-0.568	0.788	0.062	-2.07		0.22	-0.377	-1.22	-1.58	1.38
-0.211	-0.663	0.446	0.124	-2		-0.0155	-0.388	-0.971	-1.64	1.29
-0.0729	-0.92	-0.42	0.0468	-1.99		0.161	1.04	-0.75	-1.71	1.45
-0.43	-0.622	1.02	0.117	-1.78		0.445	-0.401	-0.815	-1.75	2.09
-0.197	-0.394	-0.404	-0.219	-1.62		0.766	-0.776	-0.777	-1.94	1.87
-0.429	-0.695	-0.568	0.395	-1.71		0.241	-0.747	-0.777	-1.86	1.3
-0.231	-0.251	-0.728	-0.253	-1.75		0.347	-0.788	-0.432	-1.81	1.3
-0.773	-0.685	-1.15	-0.545	-1.6		0.541	0.0863	-0.495	-1.81	1.36
-0.56	-0.845	0.161	-0.42	-1.71		0.756	-1.33	-0.572	-1.95	1.52
-0.656	-0.229	0.167	0.723	-1.66		0.344	-0.356	-0.817	-1.91	1.51
-0.508	-0.361	0.196	0.537	-1.51		0.298	-0.743	-0.847	-1.62	1.17
0.05	-0.0798	-0.33	1.04	-1.4		0.166	0.927	-0.861	-1.98	1.31
0.108	-0.876	-0.803	0.479	-1.47		0.179	-1.44	-0.825	-1.52	1.32
0.336	-0.681	-0.405	0.521	-1.35		0.242	-0.326	-1.03	-1.6	0.522
0.183	-1.19	-2.19	0.247	-1.17		0.472	-1.72	-0.962	-1.87	0.373
0.32	-0.927	-1.47	-0.0929	-1.27		0.721	-1.52	-0.851	-1.71	0.624
0.36	0.083	-1.81	0.19	-1.27		0.592	-0.354	-0.832	-1.85	0.539
-0.0614	-0.285	-1.93	-0.124	-1.21		0.189	-0.389	-1.12	-1.76	0.752
-0.208	-0.959	-2.32	-0.343	-1.36		0.7	-1.28	-0.952	-1.78	1.02
-0.225	-0.604	-0.547	-0.379	-1.51		0.0972	-2.24	-1.02	-2.03	1.38
0.0418	-0.948	-0.0038	-0.0458	-1.43		0.249	-0.0269	-0.663	-2.02	1.09
0.0533	0.691	-1.28	-0.00191	-1.41		-0.306	-0.407	-0.728	-1.9	0.921
0.186	0.196	-1.38	0.463	-1.51		-0.131	-0.0621	-0.542	-2.12	0.736
-0.0785	-0.438	-0.984	0.236	-1.45		-0.251	0.164	-0.643	-2.3	1.09
0.0928	-1.23	-1.63	0.369	-1.39		-0.435	0.245	-0.466	-2.17	1.18
-0.173	-0.895	0.0563	0.527	-1.49		-0.0206	-1.86	-0.665	-2.12	1.66
-0.0861	-1.21	-0.254	0.214	-1.4		-0.122	-0.193	-0.501	-1.9	1.12
-0.119	-0.0489	0.419	0.546	-1.41		-0.522	-1.48	-0.657	-2.29	1.31
0.181	-0.351	-1.79	0.432	-1.34		-0.157	-0.16	-0.7	-1.77	0.606
0.0662	-0.473	-0.546	0.398	-1.32		-0.232	0.376	-0.762	-2	0.909
0.0294	-0.161	-0.541	0.533	-1.26		0.0899	-1.16	-0.406	-2.08	0.875
-0.306	-0.881	-1.73	0.0837	-0.675		0.189	-1.28	-0.657	-2.16	0.808
-0.0399	-1.48	-0.199	0.126	-0.575		0.0795	-1.4	-0.614	-1.83	1.17
0.249	-1	0.0418	0.303	-0.45		-0.715	-0.675	-0.77	-1.81	0.544
-0.0912	-1.15	0.0716	0.494	-0.527		-0.246	-0.649	-0.608	-2	1.21
-0.293	-0.718	-0.0203	0.0394	-0.476		0.113	0.273	-0.752	-1.86	1.3
-0.256	-0.776	0.1	-0.156	-0.646		0.127	-0.373	-0.751	-1.96	1.1
-0.467	-0.295	0.393	-0.291	-0.741		0.245	-1.05	-0.985	-1.96	0.427
-0.495	-0.516	-0.0056	-0.151	-0.671		0.592	0.0174	-1.23	-1.68	0.331
0.0655	-0.0241	0.578	-0.579	-0.59		0.437	-0.0511	-1.1	-1.93	0.189
0.0919	-0.45	-0.262	-0.0874	-0.592		0.928	-0.6	-0.851	-1.93	0.716
-0.106	-0.969	-1.17	-0.863	-0.752		0.0798	-0.788	-1.27	-2	-0.0743
0.131	0.447	0.461	-0.787	-0.631		0.207	-1.18	-1.3	-1.97	0.928
0.155	1.37	0.0777	-0.298	-0.704		0.944	0.493	-1.07	-1.45	1.1
-0.0346	2.09	1.38	-0.501	-0.684		0.84	-0.18	-0.904	-1.68	0.711
-0.304	1.62	0.459	-0.431	-0.454		0.648	-1.19	-0.892	-1.8	1.24
-0.481	0.3	0.358	-0.351	-0.539		0.457	-0.95	-1.13	-1.51	1.23
-0.0458	1.47	-1.06	0.329	-0.627		0.343	-1.02	-1.01	-1.55	0.915
-0.116	0.266	0.127	0.439	-0.943		0.58	0.0805	-0.609	-1.22	0.633
0.0285	-0.115	-0.706	0.777	-0.998		0.313	0.332	-0.891	-1.18	0.934
0.2	0.442	-0.24	0.618	-1.06		-0.0299	-0.501	-0.758	-1.39	0.326
0.703	-0.131	-0.885	0.785	-0.831		-0.0256	-1.13	-0.794	-1.4	0.739
0.528	0.262	-1.33	0.234	-0.683		0.501	-0.289	-1.07	-1.34	0.383
0.704	-0.0772	-1.4	0.199	-0.816		0.983	0.0372	-0.646	-1.27	0.35
0.607	-0.23	-1.05	0.297	-0.75		0.613	-0.282	-1.09	-1.41	-0.247
0.592	-0.451	-0.973	-0.0926	-0.897		0.749	0.125	-0.978	-1.38	-0.242
0.735	0.368	-0.605	0.0754	-1.07		0.26	-0.833	-0.92	-1.73	-0.0246
0.161	0.703	-0.619	0.853	-0.879		0.25	-0.132	-0.911	-1.36	-0.251
0.0908	0.372	-0.883	0.581	-0.919		0.484	-0.115	-1.08	-1.09	-0.0674
-0.00797	-0.549	-1.47	1.5	-1.01		0.478	-0.806	-1.04	-1.42	-0.307
0.168	-0.375	-1.35	1.17	-0.911		0.2	-1.44	-0.685	-1.24	-0.142
0.212	-0.625	-0.958	1.41	-0.686		0.0581	1.67	-1.12	-1.33	0.372
0.442	-0.901	-0.541	1.56	-0.509		0.432	-0.434	-1.07	-1.25	0.142
0.175	-1.54	0.897	1.62	-0.591		0.259	-0.0679	-1.2	-1.1	0.34
0.63	-0.682	0.352	1.75	-0.542		1.04	0.171	-0.445	-1.36	0.673
0.239	-0.677	0.0883	1.87	-0.499		0.986	0.794	-0.589	-1.27	0.77
-0.0892	0.182	-0.154	2.27	-0.344		1.38	0.0551	-0.692	-1.16	-0.0237
0.295	0.489	-0.954	1.38	-0.198		1.79	-0.641	-0.673	-1.59	0.62
1.09	-0.207	-1.17	1.42	-0.358		1.74	0.173	-0.727	-1.42	0.503
0.702	-0.0578	-0.761	1.22	-0.386		1.91	0.84	-0.662	-1.44	-0.0551
1.07	0.784	-0.62	1.01	-0.392		1.96	0.368	-0.495	-1.48	0.0542
0.469	-0.368	-0.00213	1.25	-0.22		1.47	-0.508	-0.689	-1.32	-0.0916
0.0942	0.753	-0.608	1.21	0.124		1.47	0.468	-0.905	-0.916	-0.315
0.0553	0.445	1.21	1.26	-0.0186		1.73	-0.189	-0.475	-0.553	0.127
0.341	0.848	0.343	1.08	0.0133		1.42	0.993	-1.06	-0.881	0.0176
0.23	-0.237	0.616	1.27	0.211		1.26	0.423	-0.648	-1.07	-1.16
0.233	-0.264	-1.01	1.52	-0.218		1.86	0.0981	-0.633	-0.789	-0.613
0.256	-0.04	-0.864	1.49	-0.296		1.7	0.319	-1.12	-1	-0.0988
0.111	0.407	-0.677	2.2	-0.162		2.14	-0.557	-1.4	-1.4	0.185
-0.0306	0.947	-1.81	4.46	-0.158		2.03	-0.351	-1.34	-0.813	0.277
0.0255	0.919	-2.04	5.16	0.173		3.38	1.33	-0.947	-1.48	0.372
0.0555	0.143	-0.911	6.15	0.6		3.55	0.13	-0.983	-1.11	-0.0518
-0.114	0.391	-1.86	5.52	0.597		3.5	0.164	-0.806	-1.12	-0.236
-0.44	0.223	-1.47	5.15	0.506		3.27	0.144	-1.05	-1.22	0.227
-0.303	-0.512	-1.09	4.1	0.307		2.79	-0.919	-1.33	-1.33	-0.519
-0.363	-0.402	-0.843	3.78	0.198		3.21	0.877	-1.14	-1.23	-0.319
-0.288	-0.594	-0.831	3.38	0.192		2.54	0.134	-1.28	-1.29	-0.00321
0.0935	-0.568	-1.29	3.84	0.111		2.06	0.895	-1.73	-1.4	0.377
0.143	-0.478	-1.51	3.09	-0.046		2.01	0.756	-1.24	-1.57	0.274
-0.252	-0.337	-0.367	3.25	0.197		2.15	1.02	-1.29	-1.37	0.562
-0.0793	-0.63	-2.39	2.72	-0.111		1.94	-0.809	-1.4	-1.57	0.363
-0.0964	-0.53	-1.43	2.52	0.0465		1.74	-0.978	-1.24	-1.56	-0.137
-0.386	-0.288	-0.908	2.63	-0.0828		1.82	1.34	-1.52	-1.35	-0.285
-0.32	0.000333	-1.03	2.53	-0.205		2.15	-0.562	-1.39	-1.48	-0.152
-0.788	0.433	-0.699	3.11	-0.28		2.42	0.606	-1.24	-1.51	-0.0673
-0.537	1.34	-0.531	3.02	-0.369		2.86	-0.171	-1.12	-1.64	0.244
-0.428	0.938	-1.1	2.85	-0.214		2.58	-0.0835	-1.15	-1.39	0.31
-0.84	0.886	-2.31	2.48	-0.383		2.59	-0.237	-1.01	-1.18	0.361
-0.778	0.709	-0.276	2.64	-0.298		2.45	0.209	-1.03	-1.63	0.627
-1.02	0.447	-1.32	2.49	-0.407		2.04	-0.862	-1.06	-1.33	0.662
-0.624	0.0353	-1.6	2.65	-0.322		2.11	0.127	-1.04	-1.34	1.03
-0.591	0.363	-0.675	2.23	-0.552		2.55	1.22	-1.08	-1.58	0.831
-0.468	0.479	-0.653	2.46	-0.448		2.33	1.5	-1.09	-1.61	1.46
0.018	0.828	-2.03	2.29	-0.323		2.24	-0.236	-1.22	-1.41	1.12
-0.354	0.15	-3.36	2.18	-0.482		2.48	0.487	-1.21	-1.79	1.04
-0.349	-0.0991	-2.53	1.83	-0.601		1.83	-0.359	-1.36	-1.08	1.46
-0.128	-0.5	-0.329	2.07	-0.635		2.08	-0.235	-1.44	-1.4	0.732
-0.308	-0.69	-1.26	1.23	-0.578		2.21	-0.0996	-1.38	-1.39	0.923
0.00198	-0.631	-2.06	2.03	-0.652		1.66	1.22	-1.13	-1.12	1.24
0.114	0.0287	-1.22	1.05	-0.627		1.89	1.77	-0.995	-1.03	0.946
-0.0122	0.682	-1.45	1.41	-0.55		1.41	0.654	-1.08	-1.09	0.631
-0.00378	-0.0533	-1.29	1.46	-0.509		1.02	0.509	-0.66	-1.48	1.01
-0.17	0.145	-1.28	1.22	-0.645		1.01	-0.616	-0.32	-0.941	0.499
-0.38	0.341	-1.16	1.03	-0.796		0.551	0.48	0.0492	-1.14	0.203
-0.677	0.656	-1.08	1.28	-0.713		0.664	0.999	-0.199	-1.3	-0.318
-0.331	0.523	-2.05	0.947	-0.465		0.564	-0.693	-0.51	-1.26	0.227
-0.229	-1.64	-0.0638	1.17	-0.561		1.13	0.819	-0.0865	-1.35	0.025
-0.264	-1.18	-0.506	0.534	-0.496		1.34	0.394	-0.5	-1.6	1.46
-0.237	-0.0701	-2.54	0.764	-0.615		1.19	1.16	-0.677	-1.46	1.01
-0.247	0.0696	-2.54	0.286	-0.571		1.72	0.795	-0.405	-1.47	0.553
0.0289	-0.59	-2.27	0.556	-0.281		1.78	-0.549	-0.543	-1.5	0.943
-0.343	-0.554	-1.64	0.682	-0.384		1.41	-1.2	-0.174	-1.46	1.06
-0.425	-1.92	-0.632	0.822	-0.408		1.39	0.905	-0.238	-1.62	1.23
-0.311	-1.67	-1.91	1.18	-0.661		2.07	0.0195	-0.495	-1.57	1.43
-0.219	-0.903	-1.25	1.15	-0.522		2.66	1.14	-0.673	-1.66	0.639
-0.646	-1.35	-1.56	1.06	-0.61		3.2	0.523	-0.534	-1.57	0.355
-0.584	-0.938	-1.17	1.09	-0.668		2.31	0.488	-0.244	-1.63	0.845
-0.369	-0.59	-0.705	0.929	-0.732		2.82	0.0349	-0.532	-1.76	0.152
-0.577	0.0997	-0.634	0.654	-0.758		2.42	1.06	-0.641	-1.8	-0.292
-0.303	-0.315	-0.322	1.63	-0.863		2.16	-0.26	-0.67	-1.69	-0.0699
-0.37	-0.377	-1.01	1.05	-0.814		2	0.487	-0.68	-1.84	-0.5
-0.29	-1.18	0.343	1.46	-0.81		2.45	-0.00333	-0.393	-1.71	-0.59
-0.377	-2.18	-0.441	1.92	-0.658		2.29	0.937	-0.613	-1.44	-0.481
-0.227	-1.61	0.712	1.82	-0.153		1.94	-0.207	-0.765	-1.51	-0.942
-0.489	-1.53	-0.946	1.26	0.112		1.78	0.133	-0.695	-1.4	-0.526
-0.242	-0.662	-1.78	0.589	0.209		1.43	0.141	-0.724	-1.41	-0.463
-0.239	-0.275	-0.687	1.08	0.384		0.923	0.768	-0.748	-1.36	-0.495
-0.165	0.213	-1.04	0.981	0.475		0.85	1.06	-0.684	-1.2	-0.21
-0.132	-0.144	-0.669	0.577	0.458		0.421	1.2	-0.74	-1.52	-0.198
-0.132	0.224	-0.0821	1.1	0.262		0.916	2.02	-0.815	-1.17	-0.513
-0.211	0.432	-0.0464	0.456	0.128		0.996	0.622	-0.704	-1.55	-0.896
0.186	-0.722	-0.0497	0.937	0.0938		0.377	0.332	-0.529	-1.71	-1.22
0.375	-0.81	-0.522	1.12	0.0107		0.207	0.379	-0.488	-2.02	-1.25
-0.167	-0.92	-0.321	1.18	-0.127		0.428	0.68	-0.179	-1.83	-1.27
0.26	-1.44	0.0565	0.772	-0.0822		0.27	-0.461	-0.706	-2.04	-1.33
-0.0603	-1.75	-0.189	0.487	0.0169		0.159	0.0223	-0.256	-2.21	-1.42
0.0318	-1.75	-0.783	0.942	0.258		-0.526	0.97	-0.376	-1.88	-1.36
-0.199	-1.74	-0.977	0.427	0.37		0.689	0.498	-0.413	-2.12	-1.35
0.368	-1.27	-1.26	-0.0656	0.389		0.938	-0.143	-0.379	-2.26	-1.31
0.323	-0.944	-1.44	0.58	0.472		0.878	0.554	-0.0919	-2.14	-1.15
0.256	-1.17	-1.76	-0.317	0.604		1.01	-0.671	0.512	-2.05	-0.771
0.36	-1.15	-1.81	0.2	0.513		1.16	1.25	0.704	-2.48	-0.704
0.119	-1.55	-1.33	0.496	0.397		1.31	0.0676	0.642	-1.93	-0.171
0.0199	-1.47	-1.36	0.119	0.377		0.747	-0.462	0.539	-1.87	-0.372
0.003	-2.01	-1.11	0.313	0.292		1.12	1.22	0.502	-1.84	-0.309
0.148	-1.76	0.11	0.242	0.333		0.816	1.68	0.467	-2.15	-1.33
0.0575	-1.24	-0.831	0.916	0.334		0.836	1.3	0.512	-2.34	-1.33
0.115	-1.51	-0.674	0.41	0.495		0.744	1.11	0.456	-1.81	-1.11
-0.256	-1.01	-1	0.939	1.45		0.11	2	0.116	-1.73	-1.24
-0.0293	-1.37	0.101	0.487	2.33		0.506	0.849	0.188	-2.09	-2.4
0.272	-1.29	-0.0646	0.586	2.29		0.506	1.09	0.0511	-1.94	-1.87
-0.191	-0.964	-0.875	0.523	2.39		0.285	0.683	-0.107	-1.87	-1.63
-0.189	-1.3	-0.29	0.455	2		0.25	1.3	-0.326	-1.71	-1.38
-0.2	-1.18	-0.192	0.372	1.86		0.24	1.22	-0.296	-1.94	-1.04
-0.112	-1.17	-0.768	1.04	1.71		-0.394	1.55	0.0723	-1.92	-0.799
-0.181	-1.83	-0.531	1.04	1.64		-0.43	0.91	0.165	-1.78	-0.581
-0.111	-0.738	-1.26	0.771	1.54		-0.0177	0.363	-0.0161	-1.65	0.0917
-0.211	-0.792	-2.41	0.66	1.51		0.347	1.49	0.126	-1.62	-0.183
-0.301	-0.302	-1.12	0.741	1.4		0.522	2.2	-0.03	-1.92	-1.1
-0.246	-0.877	-1.06	0.652	1.29		0.208	0.785	0.0884	-1.55	-0.902
-0.636	0.687	0.0816	0.732	0.968		0.72	0.871	-0.189	-1.65	-0.824
-0.469	0.209	-2.04	0.836	1.1		0.657	0.801	0.0313	-2.33	-1.31
-0.706	0.0597	-2.22	0.916	1.03		0.428	1.62	-0.485	-1.92	-1.2
-0.581	0.291	-0.995	0.626	0.979		0.697	0.382	-0.767	-1.77	-1.88
-0.323	0.149	-1.28	1.21	0.93		0.569	1.68	-0.605	-2.03	-1.2
-0.305	-0.983	-0.714	0.399	0.786		0.816	1.37	-0.483	-2.23	-2.05
-0.311	0.545	-0.297	0.694	0.906		0.454	0.994	-0.266	-2.04	-1.91
-0.404	-0.0952	-1.15	0.582	0.873		0.209	1.17	-0.406	-2.01	-1.71
-0.226	-0.637	-1.81	0.557	0.856		0.395	0.873	-0.519	-1.7	-1.84
-0.166	-0.739	-0.711	0.619	0.889		0.156	0.401	-0.318	-2.07	-1.2
-0.449	-0.0793	-0.694	0.481	0.778		0.587	1.74	-0.588	-1.98	-1.53
-0.532	-0.243	-1.88	1.22	0.827		1.79	1.12	-0.56	-2.05	-1.78
-0.465	0.416	-1.17	1.15	0.696		2.45	0.86	-0.493	-1.67	-1.7
-0.532	-0.153	0.0673	1.36	0.37		2.36	0.523	-0.522	-2.04	-1.81
-0.702	-0.588	0.0317	0.96	0.275		2.05	0.421	-0.558	-2.11	-1.76
-0.804	-0.447	0.053	1.83	0.124		2.26	0.97	-0.878	-1.5	-1.98
-0.403	-0.9	-1.32	1.03	0.346		2.22	0.465	-1.02	-1.74	-1.75
-0.0453	-0.629	0.186	0.992	0.169		2.59	-0.384	-0.74	-1.71	-2.14
-0.284	-1.17	0.624	1.01	0.0798		2.07	0.127	-0.614	-1.26	-1.88
-0.304	-0.182	-0.295	0.869	-0.0158		2.12	1.19	-0.448	-1.2	-1.78
-0.111	0.00855	0.57	0.293	0.0948		1.9	1.69	-1.02	-1.83	-1.94
-0.477	0.0841	-0.7	0.562	0.25		1.32	1.59	-0.905	-1.69	-2.11
-0.445	-0.124	-0.748	0.534	0.351		1.27	1.3	-1.2	-1.99	-1.9
-0.395	0.162	-1.01	1.06	0.718		0.974	0.647	-0.831	-1.95	-1.53
-0.0102	-0.718	-0.613	0.484	0.948		1.23	1.4	-0.887	-1.94	-0.863
0.261	-0.373	-0.18	0.202	0.92		0.87	1.78	-0.823	-1.91	-0.714
0.124	-0.0734	0.894	0.185	0.675		0.746	0.333	-0.476	-1.86	-0.457
-0.201	-0.593	-0.199	0.355	0.766		0.839	1.71	-0.9	-2.01	-0.549
-0.378	-1.2	0.408	0.628	0.757		0.0642	2.36	-0.939	-1.47	-0.613
-0.223	-0.18	0.233	0.889	0.647		0.5	1.14	-0.915	-1.89	-0.235
-0.0811	-1.02	0.0367	0.872	0.357		0.374	0.425	-0.611	-2.33	-0.202
0.0778	-0.224	0.398	0.713	0.546		-0.025	0.095	-0.479	-2.1	-1.03
0.587	-0.692	-0.457	0.83	0.418		0.0986	1.16	-0.638	-2.12	-1.06
0.65	-0.569	0.847	0.775	0.332		0.162	0.72	-0.326	-2.22	-0.789
0.566	-0.0403	-0.522	1.25	0.228		-0.0234	-0.0636	0.0151	-2.14	0.241
0.252	-0.311	-0.986	1.54	0.241		-0.011	0.294	-0.131	-2.38	0.565
0.546	0.23	-0.605	1.21	0.121		-0.307	-0.0115	0.227	-2.15	0.103
0.462	0.142	-0.732	1.42	0.104		-0.549	-0.0566	0.0796	-2.15	0.129
0.236	-0.446	-1.59	1.52	0.0947		-0.275	0.877	0.00427	-2.24	0.346
0.222	-0.115	-0.249	1.01	0.302		-0.714	0.842	0.000444	-1.94	-0.172
0.0146	-0.363	0.866	1.06	0.221		-0.356	1.24	-0.0355	-2.23	0.0157
-0.0687	-0.754	0.122	1.11	0.163		-0.687	1.11	0.0406	-2.28	-0.112
0.158	-0.522	1.53	0.497	-0.0143		-0.223	-0.58	0.00741	-1.97	-0.397
-0.101	-1.04	0.849	0.66	-0.165		-0.782	0.263	-0.522	-2.19	-0.473
0.757	-1.5	0.551	0.211	0.215		-0.214	0.278	-0.535	-1.93	0.0544
0.77	-0.225	-0.245	0.65	0.336		-0.252	0.509	-0.43	-1.77	-0.138
0.624	-0.783	-1.57	-0.0199	0.284		-0.0156	-0.241	-0.723	-1.77	-0.109
0.324	-0.733	-0.57	-0.112	0.108		-0.0838	0.806	-0.649	-1.9	-0.356
0.0104	-1.09	0.188	-0.191	0.0864		-0.318	1.06	-1.09	-1.79	-0.461
0.753	-0.551	0.107	-0.115	0.301		-0.746	0.659	-0.991	-1.78	-0.514
0.187	-1.37	-0.896	-0.245	0.479		-0.299	0.316	-1.05	-1.66	-0.418
0.0203	-1.13	-0.421	-0.334	0.468		-1.01	0.423	-1.04	-2.08	-0.457
-0.071	0.424	-0.571	-0.363	0.542		-1.06	0.757	-0.933	-2.04	-0.0795
-0.291	0.284	0.195	-0.239	0.662		-0.902	0.806	-1.09	-1.76	-0.405
-0.193	0.547	-0.954	-0.429	0.523		-1.1	0.973	-0.738	-1.69	-0.299
-0.12	0.17	-1.11	-0.531	0.756		-0.509	1.22	-0.844	-1.83	-0.856
-0.333	-0.23	-0.542	-0.156	0.794		-1.09	0.903	-0.578	-2.19	-1.21
-0.291	-0.506	-0.643	-0.291	0.639		-0.931	0.953	-0.424	-1.91	-0.891
-0.647	-0.41	-1.24	-0.0902	0.551		-0.483	0.97	-0.781	-1.54	-0.956
-0.695	0.792	-0.106	0.153	0.412		-0.55	1.74	-0.301	-1.68	-0.677
-0.588	0.35	0.0554	-0.0119	0.443		-0.475	0.608	-0.726	-1.44	-0.539
-0.672	1.83	0.583	-0.551	0.332		-0.399	0.509	-0.279	-1.63	-1.56
-0.51	0.511	0.28	-0.42	0.417		-0.444	-0.583	-0.755	-1.76	-0.8
-1.18	1.22	-0.444	-0.322	0.0554		-0.842	0.232	-0.751	-1.69	-0.647
-1.21	0.962	0.457	-0.288	0.124		-0.928	1.14	-1.17	-1.99	0.033
-1.06	0.581	-0.9	0.019	0.161		-1	0.925	-1.2	-1.79	-0.157
-0.878	0.638	-0.0612	-0.0951	0.321		-0.905	-1.23	-1.24	-1.83	0.162
-0.891	0.87	-0.72	-0.022	0.0985		-1.05	0.712	-1.37	-1.67	-0.762
-0.981	2.17	0.0361	-0.31	-0.00576		-1.03	0.521	-1.15	-1.62	-0.578
-0.918	1.73	0.431	-0.0567	0.165		-1.16	0.254	-1.64	-1.71	-0.634
-0.259	0.82	0.953	-0.249	-0.116		-1.3	0.471	-1.4	-1.89	-0.809
-0.227	1.26	-0.361	-0.000603	-0.144		-1.22	1.67	-1.02	-1.85	-1.69
-0.241	0.697	-0.201	0.273	-0.259		-0.757	1.42	-0.896	-1.85	-1.41
0.0939	0.988	-0.651	0.533	-0.209		-1.28	-0.805	-1.2	-1.46	-0.849
0.084	0.758	-0.64	0.000129	-0.403		-0.851	0.089	-1.55	-1.76	-0.918
0.00999	0.517	-1.23	0.0771	-0.489		-0.62	-0.509	-1.2	-1.94	-0.892
-0.166	-0.0505	-0.308	-0.242	-0.603		-0.952	-0.15	-1.45	-1.77	-0.486
-0.581	0.0787	-1.2	0.101	-0.517		-1.12	0.306	-1.61	-1.72	-0.894
-0.205	-0.443	-0.105	-0.296	-0.518		-1.37	-0.423	-1.62	-1.36	-0.903
-0.462	0.355	-0.559	0.523	-0.587		-0.953	-0.265	-0.791	-1.86	-1.11
-0.395	0.351	-0.492	0.345	-0.725		-0.955	0.619	-1.06	-1.7	-1.25
-0.0752	0.816	0.207	0.119	-0.746		-0.3	0.204	-1.1	-1.78	-1.63
-0.204	0.966	0.569	-0.183	-0.833		-0.493	-1.1	-0.735	-1.82	-0.844
-0.193	0.87	-0.724	0.156	-1.03		-0.858	0.398	-0.429	-1.67	-1.27
0.0812	-0.00507	1.03	0.0288	-0.913		-1.38	0.456	-0.766	-1.83	-1.03
-0.336	0.396	0.696	0.0168	-0.956		-0.742	0.753	-0.776	-1.79	-0.929
-0.152	0.482	0.641	-0.0598	-0.846		-0.711	0.286	-0.466	-1.62	-1.29
-0.28	0.496	0.563	0.0164	-0.899		-0.41	-0.386	-0.652	-1.5	-0.816
-0.496	0.27	0.707	0.05	-0.667		-0.0704	-0.531	-0.794	-1.55	-1.27
-0.315	0.619	1.95	-0.364	-0.598		-0.297	0.178	-1.14	-1.68	-1.16
-0.407	0.345	0.106	-0.201	-0.687		-0.564	0.825	-0.964	-1.43	-0.171
-0.183	-0.398	-0.321	-0.584	-0.652		-1.08	0.764	-0.642	-1.29	-0.653
-0.419	-0.555	0.401	0.206	-0.471		-1.03	-0.987	-0.755	-1.79	-0.692
-0.38	0.485	0.464	-0.0422	-0.658		-1	0.903	-0.677	-1.82	-0.169
-0.704	0.151	0.784	-0.378	-0.683		-1.4	0.771	-1.25	-1.84	0.343
-0.392	0.858	-0.604	-0.225	-0.879		-1.27	-0.677	-1.43	-1.91	0.183
-0.545	1.06	0.0976	0.121	-0.876		-1.25	-0.294	-1.35	-1.64	-0.566
-0.613	1.89	0.727	0.0079	-0.793		-0.838	-0.698	-1.68	-1.67	-0.37
-0.689	2.34	-0.679	-0.292	-1.07		-1.26	0.762	-1.66	-1.44	-0.154
-0.958	1	0.328	0.00854	-1.09		-1.17	0.388	-1.45	-1.25	-0.4
-1.08	1.57	-0.773	-0.077	-1.14		-1.38	0.314	-1.38	-1.03	-0.439
-1.32	0.555	0.293	0.00334	-0.851		-0.921	0.719	-1.25	-1.19	-0.657
-1.35	0.194	0.722	0.0406	-0.789		-1.13	-0.319	-1.52	-1.32	-0.54
-0.544	1.15	-0.888	-0.124	-0.864		-0.847	0.615	-1.61	-1.24	-0.544
-0.0813	0.533	0.0236	-0.568	-0.99		-0.405	1.05	-1.39	-0.803	-0.955
-0.203	1.66	-0.568	0.456	-1.06		-0.828	0.0928	-1.31	-1.19	-0.475
-0.504	1.59	1.09	-0.236	-0.926		-0.568	0.893	-1.35	-1.34	-0.599
-0.14	1	-0.67	-0.186	-1.33		-1.57	0.461	-1.69	-1.12	-0.846
-0.13	1.63	0.176	-0.428	-1.17		-1.19	-0.305	-1.46	-1.19	-0.223
-0.332	1.03	0.67	-0.119	-1.16		-1.48	0.551	-1.77	-1.35	-0.462
-0.161	1.57	-0.292	-0.25	-1.08		-1.1	0.78	-1.23	-1.06	-0.0731
-0.802	2.16	-0.554	-0.357	-1.21		-1.16	0.121	-1.17	-1.2	0.0684
-0.503	2.15	0.597	-0.536	-1.18		-1.18	0.587	-0.957	-0.931	0.0193
-0.52	1.64	-0.207	0.104	-0.997		-1.26	1.67	-1.04	-1.55	-0.448
-0.469	1.58	-0.291	-0.337	-0.77		-1.32	0.229	-1.08	-0.856	-0.134
-0.468	2.19	0.383	-0.478	-0.712		-1.2	1.08	-1.31	-1.14	0.368
-0.731	1.59	-0.375	-0.355	-0.736		-0.74	0.616	-1.21	-1.23	-0.0747
-0.51	2.21	-1.08	-0.701	-0.713		-1.14	0.77	-0.98	-1.2	-0.0168
-0.412	1.53	-0.763	-0.166	-0.906		-0.563	1.02	-1.15	-1.06	-0.124
-0.713	1.17	-0.763	0.194	-0.947		-0.278	0.23	-1.28	-1.32	-0.892
-0.574	1.72	-1.22	0.183	-1.1		-0.835	1.91	-1.32	-1.16	-0.758
-0.28	2.14	-1.43	0.726	-1.01		-1.29	1.51	-1.25	-1.21	-0.874
-0.475	2.36	0.00139	0.397	-0.933		-1.17	-0.0229	-1.37	-1.43	-1.42
-0.645	2.02	-1.67	0.0758	-1.04		-0.802	0.571	-1.02	-1.63	-0.911
-0.589	2.22	-2.02	0.0152	-1.08		-0.537	0.413	-1.76	-1.2	-1.58
-0.493	0.842	-1.6	-0.0684	-1.3		-0.749	1.43	-1.3	-1.18	-2.01
0.378	0.24	-0.622	0.419	-1.29		-0.59	0.626	-1.11	-1.08	-1.68
0.752	0.578	-0.995	0.59	-1.34		-0.502	0.448	-1.29	-1.18	-1.58
0.885	0.661	-0.101	0.427	-1.28		-0.468	0.186	-1.2	-1.06	-1.52
1.02	0.683	-0.976	-0.14	-1.27		-0.0706	-0.451	-1.33	-1.32	-1.37
0.999	1.13	-1.01	0.436	-1.2		-0.259	1.74	-1.51	-1.43	-0.981
1.08	0.645	0.248	0.655	-1.27		0.013	1.4	-1.68	-1.33	-1.11
1	0.862	0.57	0.93	-1.44		-0.00841	-0.19	-2.05	-1.48	1.13
1.28	-0.277	-0.802	0.335	-1.45		0.698	0.409	-1.85	-1.61	0.401
0.851	0.937	0.962	1.1	-1.43		0.243	-0.00967	-1.86	-1.16	0.058
0.658	0.884	0.444	1.2	-1.39		0.195	0.757	-1.92	-1.1	0.272
0.634	0.93	-1.09	1.11	-1.3		-0.368	0.17	-1.34	-1.27	0.313
0.605	0.924	-0.0907	0.665	-1.25		-0.0359	1.25	-1.97	-1.26	-0.227
0.699	0.585	0.335	0.77	-1.16		-0.0563	1.98	-2.18	-1.1	-0.273
0.625	0.65	-0.222	1.31	-0.767		-0.338	1.27	-1.98	-1.45	-0.0606
0.601	0.963	2.1	1.42	-0.62		-0.646	0.707	-1.86	-1.56	0.236
0.52	1.7	-0.159	1.46	-0.613		-0.284	1.01	-1.74	-1.22	-0.445
0.712	2.2	0.0929	1.23	-0.372		-0.246	1.11	-1.52	-1.74	-0.818
0.831	1.23	-0.278	0.847	-0.535		-0.177	0.565	-1.91	-1.79	-0.808
0.924	1.49	0.128	1.16	-0.519		-0.335	1.35	-1.39	-1.85	-0.469
0.968	2.04	-0.225	0.977	-0.647		0.0252	1.31	-1.39	-1.42	-0.492
0.892	1.94	-0.426	0.526	-0.559		-0.00356	0.643	-1.14	-1.68	-0.26
0.92	1.38	-0.476	0.973	-0.396		-0.271	-0.235	-1.15	-1.64	-0.426
0.975	2.06	0.262	1.19	-0.401		-0.667	-0.375	-1.24	-1.71	-0.189
0.728	1.13	-0.00297	0.265	-0.282		-0.488	0.473	-1.29	-1.58	0.214
0.535	0.921	0.22	0.493	0.0543		-0.271	1.06	-1.28	-1.44	0.0194
0.628	0.545	-0.163	0.761	0.0685		-0.529	1.89	-1.24	-1.22	-0.264
0.696	0.843	-0.598	0.643	0.373		-0.174	0.149	-1.19	-0.945	0.242
0.252	1.17	-1.14	1.21	0.551		-0.52	0.797	-1.34	-1.31	-0.125
0.166	1.56	-1.21	0.713	0.574		-0.315	1.31	-1.31	-1.12	-0.124
0.322	1.54	0.337	1.41	0.536		-0.672	0.539	-1.42	-0.891	-0.825
0.334	1.8	-0.931	2.78	0.245		-0.463	0.354	-1.46	-1.19	-1.04
-0.0198	0.907	-0.027	1.56	0.264		-0.182	0.748	-1.3	-1.17	-1.75
-0.118	0.901	0.0425	1.44	0.271		0.0945	1.91	-1.55	-1.15	-1.76
-0.226	1.1	0.153	1.73	0.311		-0.104	0.0469	-1.57	-1.11	-1.91
0.0659	0.393	0.253	1.18	0.346		7.84e-05	-0.902	-1.25	-1.5	-1.32
-0.228	1.39	-0.0174	1.14	0.381		0.0238	0.662	-1.39	-1.44	-1.19
-0.209	0.909	0.593	1.38	0.413		0.397	-0.0977	-1.46	-1.19	-0.82
0.0787	1.17	-0.0131	2.24	0.767		0.0911	1.86	-1.57	-1.31	-0.627
0.0376	0.41	0.863	2.15	0.808		0.424	1.14	-1.25	-1.38	-0.471
-0.0395	0.754	-0.888	2.09	0.639		0.0413	0.424	-1.47	-1.61	-0.987
0.164	0.771	0.424	1.69	0.61		0.0144	1.21	-1.36	-1.47	-1.43
-0.149	0.794	-0.259	2.47	0.622		0.124	0.672	-1.65	-1.18	-1.06
-0.324	0.389	0.562	1.96	0.571		-0.388	1.36	-1.54	-1.15	-1.01
-0.168	0.787	-0.938	1.76	0.477		0.378	2.01	-1.4	-1.06	-1.85
-0.026	0.744	-0.271	1.62	0.425		0.237	1.58	-1.45	-0.667	-1.71
0.12	0.66	1.17	1.23	0.433		0.277	1.54	-1.39	-0.956	-1.83
0.0815	0.0666	0.885	1.03	0.252		0.244	1.41	-1.29	-1.05	-1.58
-0.154	-0.461	0.619	2.14	0.182		-0.09	2.12	-1.51	-1.18	-2.06
-0.451	-0.637	0.425	1.04	-0.0307		-0.436	0.701	-1.51	-1.26	-2.03
-0.506	-0.666	1.49	1.13	-0.166		0.466	0.0267	-1.14	-1.11	-1.33
-0.624	-0.229	0.16	1.09	-0.397		0.126	2.07	-1.1	-0.933	-1.46
-1.21	-0.886	1.28	1.44	-0.291		-0.507	0.824	-0.613	-0.753	-0.383
-0.831	0.119	1.1	0.907	0.00428		-0.148	1.67	-0.947	-0.876	-0.435
-0.495	0.431	0.337	1.07	0.0898		-0.63	0.364	-0.76	-0.915	-0.366
-0.596	0.369	0.872	1.27	0.211		0.0687	1.52	-0.719	-1.34	-0.756
-0.536	0.376	1.49	1.29	0.432		-0.0332	1.88	-0.837	-1.63	-0.684
-0.85	0.923	0.253	0.429	0.3		-0.346	0.91	-1.13	-1.38	-0.471
-0.41	0.782	0.34	1.23	0.482		0.365	1.86	-0.822	-1.78	-1.03
0.204	0.812	0.124	1.21	0.582		0.315	1.95	-0.89	-1.37	-0.861
0.54	-0.044	0.808	1.09	0.548		0.295	1.48	-0.896	-1.52	-1.19
0.245	-0.119	2.04	1.26	0.589		0.211	0.831	-0.801	-1.52	-0.993
0.556	1.1	0.971	1.41	0.629		0.879	1.73	-0.423	-1.68	-0.937
0.317	1.21	0.443	0.903	0.377		0.642	1.4	-0.344	-1.34	-0.446
-0.0185	1.04	1.34	1.48	0.483		0.479	0.107	-0.431	-1.43	-0.0891
0.451	0.536	-0.375	1.29	0.456		0.286	0.528	-0.572	-1.44	-0.547
0.122	1.06	-0.323	1.76	0.44		0.591	0.31	-0.112	-1.3	-0.295
-0.151	0.801	0.819	1.04	0.366		0.58	0.853	-0.149	-1.31	-0.648
-0.51	-0.68	-0.402	1.56	0.3		0.769	1.59	0.337	-1.35	-0.797
0.224	0.909	-0.00995	1.55	0.326		0.906	0.968	0.884	-1.13	-1.5
0.224	1.16	0.9	2.01	0.18		0.436	2.03	1.92	-0.927	-1.72
0.5	1.12	0.476	1.34	0.249		0.638	1.17	1.65	-1.1	-1.65
0.284	0.553	-1.01	1.13	0.0684		0.425	1.1	1.07	-1.37	-0.703
0.163	1.11	-1.39	1.03	0.0211		0.245	0.458	1.17	-0.982	-0.893
0.185	0.703	-0.527	0.861	0.063		0.107	0.000431	1.09	-1.3	-0.834
0.257	0.749	-0.224	1.47	0.0054		0.417	-0.406	0.895	-1.39	-1.62
0.009	1.36	-0.171	1.66	-0.205		-0.13	-0.245	0.79	-1.41	-1.63
0.182	1.37	-0.185	1.35	-0.337		0.346	-0.251	0.666	-1.71	-1.7
0.565	0.945	0.688	1.55	-0.408		0.49	0.794	1	-2.03	-1.69
0.502	0.0439	1.84	1.66	-0.155		0.936	0.434	0.734	-1.44	-2.23
0.373	0.901	0.759	2.02	-0.23		0.433	-0.0554	0.686	-1.56	-2.38
0.538	-0.276	1.14	2.92	-0.355		0.636	1.45	0.733	-0.99	-2.47
0.333	0.145	1.59	3.45	-0.309		0.243	-0.289	1.01	-0.984	-1.73
0.0731	-0.0662	1.37	3.15	-0.187		0.522	0.0265	0.973	-1.42	-1.25
-0.06	-0.401	0.729	3.07	-0.139		0.61	2.13	0.679	-1.27	-1.5
0.00634	0.128	0.871	2.17	-0.29		0.0234	0.989	1	-1.29	-0.772
-0.0653	-0.393	1.42	1.99	-0.258		0.0529	0.94	0.581	-1.25	-0.975
-0.362	-0.479	0.367	1.9	0.0196		0.112	0.657	0.776	-1.15	-1.16
-0.197	-0.434	1.48	2.43	0.0232		0.39	-0.346	0.634	-1.11	-1.13
0.105	-0.781	-0.607	2.06	0.331		-0.143	-0.833	0.874	-1.02	-1.64
0.00433	-0.283	0.794	1.79	0.163		-0.17	0.656	0.685	-0.871	-1.46
-0.0219	-0.601	0.249	1.59	0.171		-0.386	0.134	0.435	-1.1	-1.73
-0.539	-0.814	1.55	1.31	0.182		0.26	0.61	0.709	-1.45	-1.88
-0.28	-0.754	0.311	1.27	0.0732		1.22	0.841	0.649	-1.23	-1.32
0.161	-0.123	1.44	0.706	-0.0309		1.29	0.593	0.985	-1.67	-1.51
0.131	0.0165	0.269	1.19	0.0242		1.28	0.175	0.418	-1.4	-0.846
0.145	0.189	2.51	0.829	-0.0718		1.72	-1.34	0.389	-1.65	-0.728
-0.361	-0.713	0.998	0.86	-0.31		1.26	-0.0584	0.579	-1.63	-0.909
-0.278	-0.355	2.13	0.122	-0.274		1.23	0.758	0.249	-1.43	-1.35
-0.379	-0.681	1.35	0.135	-0.374		1.06	0.28	0.142	-1.76	-1.28
-0.321	-0.118	1.15	-0.05	-0.432		0.302	0.176	-0.11	-1.27	-1.11
-0.289	-0.0882	1.58	0.669	-0.539		0.782	-0.24	0.241	-1.23	-1.36
-0.118	-0.639	1.33	0.381	-0.384		0.595	-0.105	0.283	-1.06	-1.72
-0.365	-0.557	1.58	0.909	-0.459		0.107	0.241	0.5	-0.962	-2.1
-0.41	-0.554	1.9	1.09	-0.463		0.132	-0.572	0.103	-0.594	-2.42
-0.0857	-0.00345	-0.587	1.53	-0.358		-0.0419	-0.194	0.1	-0.732	-2.05
-0.104	-1.58	1.48	0.909	-0.432		0.0755	0.738	-0.0779	-0.596	-1.57
-0.53	-0.679	1.86	1.64	-0.562		0.178	-0.334	-0.0537	-0.689	-1.65
-0.347	-0.606	1.19	2.03	-0.557		0.135	0.116	-0.0958	-0.832	-1.28
-0.281	-0.332	0.91	2.72	-0.403		-0.289	0.79	-0.208	-0.933	-1.56
-0.403	-0.784	0.54	2.94	-0.526		-0.112	-0.499	-0.154	-0.959	-1.56
-0.0421	-0.778	1.1	2.46	-0.486		0.0458	0.0374	-0.324	-1.12	-1.52
-0.0987	-0.0878	0.792	2.7	-0.696		-0.157	-0.121	-0.165	-0.747	-1.57
-0.401	-0.569	1.24	2.75	-0.523		-0.358	0.626	-0.62	-0.789	-1.77
-0.68	-0.522	0.277	2.23	-0.116		0.145	0.391	-0.631	-0.733	-1.33
-0.269	-0.484	1.41	2.17	-0.104		-0.572	-0.334	-0.924	-0.989	-1.3
-0.411	-0.843	0.721	1.28	-0.0651		-0.404	-1.13	-0.735	-1.35	-1.16
-0.259	-0.805	0.958	1.61	-0.0674		0.124	-0.45	-0.717	-1.07	-1.26
0.11	-0.357	0.896	1.69	-0.253		0.0339	-0.412	-1.02	-1.28	-1.24
0.0824	-0.164	0.602	1.49	-0.203		0.0977	0.518	-0.94	-1.23	-1.13
0.149	-0.463	0.634	1.4	-0.226		-0.28	-0.973	-0.693	-1.29	-1.68
0.16	-0.514	1.04	1.11	-0.299		-0.34	0.0701	-0.754	-1.42	-1.42
0.364	-0.338	0.91	1.05	-0.401		-0.711	-0.344	-0.951	-1.52	-1.65
0.172	-1.04	1.28	1.72	-0.337		-0.458	-0.532	-0.743	-1.11	-1.89
-0.0523	-0.319	1.95	1.35	-0.416		0.0917	0.0809	-0.402	-0.865	-1.4
0.245	-0.0155	0.753	1.24	-0.362		-0.266	0.909	-1.15	-1.01	-2.11
-0.243	0.712	1.44	0.775	-0.557		-0.0348	-0.148	-1.01	-0.869	-1.72
-0.37	0.536	1.21	1.11	-0.966		-0.0505	0.283	-1.27	-0.954	-2.38
-0.14	0.328	-0.327	0.392	-0.779		-0.0743	1.64	-0.91	-0.971	-2.31
-0.043	0.0833	-0.206	1.14	-0.649		-0.5	0.804	-0.752	-0.826	-2.48
0.0572	-0.253	-0.0495	0.581	-0.605		-0.629	-0.996	-0.584	-1.21	-2.27
0.058	0.665	1.16	0.847	-0.395		-0.388	0.133	-0.394	-0.967	-1.47
-0.279	0.387	0.953	0.444	-0.295		-0.68	-0.0306	-0.494	-1.19	-1.28
-0.189	0.37	-0.0278	0.745	-0.25		-0.27	-0.743	-0.324	-1.63	-1.56
-0.365	-0.0276	0.668	0.466	-0.309		-0.479	0.0947	-0.126	-1.31	-1.56
-0.127	-0.618	0.466	0.356	-0.293		-1.02	0.019	-0.353	-1.75	-1.84
-0.348	-0.285	1.43	0.513	-0.486		-1.11	-1.1	-0.0707	-2	-1.81
-0.241	0.493	1.24	-0.0684	-0.505		-0.738	0.349	-0.068	-1.47	-1.72
-0.617	1.35	1.35	0.274	-0.608		-0.828	-1.29	-0.0385	-1.22	-1.72
-0.0987	1.03	0.0581	0.381	-0.576		-0.842	-1.33	0.451	-1.06	-1.78
0.237	1.54	0.993	0.824	-0.737		-0.899	0.653	-0.114	-0.987	-0.84
1.27	1.07	2	0.945	-0.83		-0.583	-1.23	-0.541	-1.01	-0.557
0.99	0.658	0.704	0.742	-0.917		-1.28	0.0377	-0.562	-1.22	-0.928
0.92	0.848	0.414	0.64	-0.977		-1.25	-0.573	-0.555	-0.941	-0.833
0.883	0.678	-0.0971	0.415	-0.524		-1.5	0.233	-0.745	-0.666	0.26
0.649	0.538	0.555	0.459	-0.327		-1.47	-0.332	-1.12	-0.884	0.707
1.15	0.556	1.46	1.08	-0.184		-1.04	-0.48	-0.919	-0.813	0.93
0.66	0.118	0.675	1.16	-0.346		-1.2	-0.569	-0.0123	-0.356	0.232
0.863	-0.126	3.21	2.09	-0.418		-1.34	-1.15	-0.139	-0.47	0.313
0.75	0.166	0.544	1.97	-0.538		-1.34	-0.928	-0.0399	-0.7	0.857
1.2	-0.0221	0.871	2.04	-0.716		-1.43	-1.05	0.238	-0.541	0.832
1.44	-0.625	1.9	1.62	-0.721		-1	-1.06	0.247	-0.455	0.337
1.26	-0.64	0.372	1.51	-0.799		-0.639	-1.08	0.345	-0.474	0.739
1.15	-0.205	1.73	1.97	-0.613		-0.947	-0.158	0.255	-0.606	0.475
0.824	-0.78	2.23	1.35	-0.568		-0.56	-0.379	0.292	-0.525	0.381
0.564	-0.606	1.92	1.26	-0.799		-1.08	-0.222	0.0575	-0.544	0.489
0.519	-0.67	1.06	1.13	-0.794		-0.606	-0.887	0.203	-0.911	0.499
0.646	-1.02	0.163	1.31	-1		-0.505	-1.7	0.288	-0.756	0.544
0.802	-1.45	2.18	0.721	-0.683		-0.893	-1.03	0.262	-0.867	1.18
0.481	0.0232	2.79	1.55	-0.925		-0.917	-0.177	0.0675	-0.711	1.11
0.0965	0.0267	2.13	1.81	-0.968		-0.709	-0.936	0.258	-0.938	0.586
0.367	-0.398	1.35	1.36	-1.06		-0.428	-0.381	0.112	-0.65	0.894
0.435	-0.384	2.27	1.33	-0.98		0.3	-0.496	0.106	-0.517	1.07
0.295	-1.27	1.04	1.15	-0.798		1.01	-0.848	0.068	-0.768	0.76
0.417	-1.42	1.99	1.2	-0.777		0.627	-0.688	-0.105	-0.862	0.339
0.626	-2.7	0.563	0.953	-0.745		1.1	-0.731	0.622	-1.03	-0.236
0.551	-2.85	1.63	0.358	-0.621		0.704	-1.64	1.68	-1.61	0.504
0.374	-3.11	1.69	0.846	-0.5		1.12	-1.75	1.52	-1.16	-0.118
0.166	-1.95	0.489	0.803	-0.42		0.622	0.0675	1.17	-1.15	-0.477
0.965	-0.385	2.12	1.35	-0.672		0.75	-0.71	1.03	-1.07	-0.428
1.04	-0.685	-0.159	1.19	-0.617		0.916	-0.146	0.501	-0.992	0.261
0.814	-1.29	0.839	1.43	-0.579		0.925	-1.61	0.574	-0.984	-0.135
0.242	-2.08	0.824	1.04	-0.556		0.903	-1.5	0.69	-0.895	-0.511
0.289	-2.09	1.38	1.49	-0.523		1.11	-0.364	0.653	-0.804	-0.521
0.328	-1.58	0.909	1.26	-0.677		0.139	-0.0815	0.639	-0.493	-0.346
0.112	-1.09	0.75	0.455	-0.951		0.137	0.39	1.01	-0.754	-0.0868
0.0365	0.395	0.824	0.956	-0.783		0.299	-0.698	0.639	-0.485	0.0421
0.00661	0.134	0.517	1.05	-1.02		0.142	-1.9	1.04	-0.664	-0.0936
-0.0332	-0.183	0.475	0.633	-0.967		0.156	-2.1	0.947	-0.653	-0.0525
0.126	0.183	1.09	0.658	-0.928		-0.00777	-0.461	0.506	-0.644	0.623
-0.241	0.267	1.04	0.981	-0.97		0.141	-0.86	0.765	-0.626	0.0927
0.0287	-0.595	2.46	0.797	-1.02		-0.424	-1.2	0.28	-0.425	0.139
0.367	-0.57	0.857	0.761	-0.897		-0.662	-1.43	0.152	-0.838	0.197
0.411	-0.663	0.965	1.51	-0.843		-0.62	-0.846	0.355	-0.779	-0.016
0.72	0.0703	1.28	1.05	-1.07		-0.687	-0.283	0.0315	-0.897	-0.452
0.151	-0.332	0.656	1.03	-1.06		-0.443	-0.0372	-0.294	-0.912	-0.0981
0.451	0.305	-0.567	0.878	-0.881		-0.219	-0.886	0.0772	-1.1	-0.561
0.258	-0.318	0.0855	0.8	-0.914		-0.498	-0.431	0.46	-0.809	-0.0223
0.179	-0.907	0.906	0.0326	-0.88		-0.0256	0.0168	0.524	-0.662	0.144
0.239	-0.677	0.452	0.0891	-0.593		-0.464	-0.589	0.579	-0.887	0.288
0.361	-2.05	0.272	0.473	-0.465		-0.706	-0.423	0.679	-1.32	0.139
0.0732	-1.55	0.246	0.253	-0.572		-0.964	-1.33	0.327	-0.95	-0.106
-0.113	-1.7	0.282	0.274	-0.696		-0.386	-0.318	0.844	-1.03	0.205
-0.467	-1.78	0.42	0.749	-0.607		-0.788	-1.46	0.561	-0.928	-0.0863
0.0113	-1.22	0.0567	1.49	-0.674		-0.394	-1.7	0.651	-1.02	-0.499
-0.639	-1.14	0.225	1.46	-0.623		-0.438	-1.24	0.131	-1.59	-0.0392
-0.435	-1.71	-0.16	1.59	-0.703		-0.775	0.592	0.228	-1.3	-0.0383
-0.516	-1	-0.815	1.2	-0.601		-0.598	0.2	0.58	-0.987	-0.00559
-0.423	-0.912	0.494	1.08	-0.682		-0.533	0.593	0.243	-1.09	-0.0587
-0.148	-0.0958	-0.0203	0.854	-0.507		-0.088	-0.498	0.303	-0.589	-0.626
-0.0909	-0.506	0.692	1.27	-0.416		0.0118	-0.329	0.37	-1.17	-0.676
-0.54	-1.17	-1.43	0.741	-0.505		0.0865	-1.41	0.308	-1.01	-1.03
-0.408	-1.97	0.197	0.569	-0.64		-0.28	-0.828	0.483	-1.21	-0.491
-0.587	-1.67	0.69	0.401	-0.893		-0.038	-0.762	0.274	-1.14	-0.608
-0.338	-0.838	-0.376	1.2	-0.911		-0.0791	-1.65	-0.0128	-0.9	-0.8
-0.0268	-0.394	0.0465	1.5	-1.01		0.182	-1.04	0.102	-1.13	-0.55
0.0854	-0.199	-0.174	1.5	-1.03		-0.457	-0.386	0.656	-0.753	0.381
-0.0487	-0.851	0.933	1.96	-1.06		-0.985	0.575	0.203	-0.936	-0.508
-0.382	-0.68	0.434	2.18	-1.14		-0.977	-0.857	-0.012	-1.04	-0.315
-0.164	-1.61	0.909	1.84	-1.02		-0.637	0.585	0.291	-0.845	0.54
-0.123	-1.43	-1.07	1.71	-1.2		-0.71	-0.127	0.277	-1.15	0.887
0.0847	-1.08	0.0122	0.945	-1.05		-0.487	-1.18	0.0717	-1.01	1.05
-0.325	-0.682	-0.33	1.51	-1.24		-0.144	-0.482	0.0889	-1.28	0.939
-0.407	-1.56	0.222	1.28	-1.22		-0.621	0.301	0.382	-0.971	1.12
-0.388	-1.46	-0.544	1.51	-1.01		-0.797	0.414	0.37	-1.17	0.409
-0.291	-0.609	-1.1	1.08	-1.05		-0.799	-0.645	0.495	-1.11	0.668
-0.346	-1.37	-0.843	1.46	-1.18		-0.685	-1.12	0.205	-1.19	0.723
-0.0755	-1.96	0.586	1.35	-1.11		-0.88	-1.19	0.174	-1.25	0.294
0.0475	-1.07	0.577	1.18	-1.15		-1.19	-0.442	0.292	-0.983	0.371
0.193	-1.12	0.857	0.76	-0.957		-1.31	0.0533	0.359	-1.31	0.838
-0.0786	-0.208	0.222	0.986	-0.907		-1.19	0.114	0.00885	-1.41	0.767
-0.0985	-1.05	1.21	0.264	-0.88		-0.95	0.228	0.388	-1.24	0.431
-0.354	-1.03	0.819	0.265	-0.933		-0.876	-0.524	-0.0039	-1.06	0.187
-0.463	-0.821	-0.183	-0.21	-0.974		-0.312	-0.272	0.184	-1.18	-0.318
-0.363	-1.42	-0.788	0.421	-0.924		-0.572	-0.455	0.026	-1.27	0.108
-0.554	-1.14	0.57	0.03	-1.29		-0.0942	-0.0602	0.0947	-1.32	1.75
-0.353	-2.26	-0.393	0.606	-1.01		-0.246	0.0336	-0.0433	-1.08	1.31
-0.439	-1.61	0.79	0.195	-0.929		-0.128	-1.06	0.0956	-0.7	1.43
-0.352	-1.82	-0.459	0.417	-0.837		-0.464	0.412	0.294	-1	0.97
-0.568	-1.12	-0.033	0.276	-0.925		-0.385	0.899	0.545	-1.2	1.05
-0.414	-0.624	-0.375	-0.166	-1.01		-0.212	0.0662	0.367	-1.33	0.496
-0.507	-0.645	-0.437	0.0645	-0.611		-0.647	-0.0783	0.413	-0.863	0.757
-0.317	-0.494	-0.0573	0.0603	-0.558		-0.285	0.662	0.169	-0.792	0.769
-0.401	-1.44	-1.25	0.102	-0.622		-0.0879	0.822	0.407	-0.993	0.763
-0.457	-1.7	-1.68	-0.109	-0.61		-0.404	0.615	0.525	-0.654	0.736
-0.608	-1.33	-0.953	0.0597	-0.465		-0.531	-0.804	0.56	-0.442	0.92
-0.564	-1.89	-0.392	-0.0227	-0.389		-0.662	-0.0941	0.684	-0.446	0.623
-0.704	-1.39	-0.682	-0.19	-0.428		-0.554	0.452	0.199	-0.487	0.582
-0.476	-1.4	-0.044	0.116	-0.554		-0.401	1.15	0.433	-0.379	1.38
-0.572	-1.14	0.00329	-0.369	-0.604		-0.351	1.11	0.453	-0.545	1.54
-0.641	-0.943	-0.444	-0.524	-0.864		-0.77	1.03	0.885	-0.364	0.913
-0.444	-1.16	-0.637	-0.541	-1		0.161	0.803	0.881	-0.651	-0.223
-0.0813	-1.27	0.295	-0.71	-1.01		-0.175	1.71	0.675	-0.566	0.15
-0.139	-1.4	0.917	-0.792	-0.953		-0.165	-0.11	0.332	-0.902	0.461
-0.288	-1.77	0.857	-0.539	-0.899		-0.251	1.84	0.528	-1.06	-0.0716
-0.538	-2.78	-0.645	-0.28	-0.936		-0.429	0.438	0.472	-0.818	0.497
-0.25	-2.22	-0.518	-0.37	-1.03		-0.474	0.574	0.424	-0.672	0.467
-0.176	-1.63	0.577	-0.8	-1.01		0.0136	0.929	0.673	-0.728	0.71
-0.152	-1.12	1.45	-0.575	-1.05		0.223	0.813	0.197	-0.384	0.655
-0.448	-1.44	0.17	-0.28	-1.13		0.306	-0.44	0.284	-0.368	0.413
-0.296	-3.07	-0.423	-0.269	-1.4		-0.00413	1.01	0.185	-0.269	0.34
-0.242	-2.11	0.517	-0.504	-1.18		0.0163	3.45	0.157	-0.0242	0.342
-0.156	-1.61	-0.471	-0.647	-1.26		-0.0243	2.15	0.263	-0.0315	0.363
-0.19	-1.13	0.634	-0.73	-1.21		0.2	1.73	0.307	-0.216	0.717
-0.124	-0.628	1.39	-0.613	-1.16		0.949	3.16	0.123	-0.0814	0.683
-0.132	-0.627	2.24	-1.05	-1.29		0.581	2.91	0.269	-0.36	0.965
-0.322	-0.974	0.472	-0.754	-1.31		0.206	2.24	0.193	0.0416	0.468
-0.179	-1.77	-0.664	0.103	-1.25		0.384	2.26	0.493	0.249	0.345
-0.235	-2.11	-0.451	-0.4	-1.31		0.183	2.54	0.523	-0.241	0.797
-0.287	-2	-1.11	-0.455	-1.53		0.812	2.87	0.44	-0.356	1.32
-0.446	-1.51	1.11	0.349	-1.34		0.392	2.59	0.274	-0.37	1.01
-0.547	-0.807	0.314	0.844	-1.38		0.468	2.28	0.326	-0.18	1.51
-0.342	-0.332	-1.45	1.78	-1.35		0.297	3.24	0.187	-0.338	0.758
-0.622	-1.09	0.97	1.53	-1.38		0.306	3.27	0.443	-0.257	0.576
-0.57	-0.0826	0.163	1.32	-1.38		-0.036	2.17	0.234	-0.225	1.21
-0.258	-0.508	0.962	1.66	-1.34		-0.11	3.79	0.528	-0.133	1.02
-0.532	-0.222	-0.621	1.44	-1.4		-0.738	2.79	0.695	-0.154	1.22
-0.686	0.0124	0.199	1.48	-1.52		0.00765	1.72	0.648	-0.224	0.979
-0.834	0.0836	-0.191	1.36	-1.28		-0.00724	2.76	0.738	-0.051	0.385
-0.957	0.268	0.985	1.68	-1.44		-0.178	0.981	1.12	-0.311	1.09
-1.13	-0.0948	0.408	1.25	-1.53		-0.267	2.46	0.813	-0.103	0.697
-0.874	-0.946	0.304	1.19	-1.33		0.0233	2.08	0.692	-0.55	0.517
-0.82	-0.696	-0.434	1.39	-1.3		-0.168	2.03	0.486	-0.0462	-0.12
-0.705	-0.657	0.413	0.979	-1.31		-0.515	2.23	0.689	-0.276	-0.228
-0.641	-0.975	-0.424	0.877	-1.37		-0.215	0.944	0.811	-0.218	0.876
-0.582	0.49	0.268	0.61	-1.41		0.123	1.34	0.634	-0.484	0.186
-1.08	0.961	-0.46	0.553	-1.38		0.31	0.71	0.205	-0.34	0.0658
-0.919	0.407	0.152	0.732	-1.25		0.219	1.19	0.406	-0.5	0.161
-0.658	0.78	-0.557	0.942	-1.46		-0.397	0.889	0.261	-0.284	0.39
-0.932	0.336	0.264	0.889	-1.42		-0.0124	1.82	0.17	-0.551	0.225
-0.38	0.514	-0.883	0.44	-1.58		-0.21	1.19	0.373	-0.155	-0.441
-0.528	0.157	-0.0646	0.484	-1.47		-0.184	1.95	0.0827	-0.586	-0.6
-0.738	0.0454	-0.246	0.512	-1.47		0.0029	1.18	0.243	-0.636	-0.301
-0.7	0.133	0.397	0.339	-1.51		0.188	1.65	0.131	-0.552	0.634
-0.39	0.759	-0.0957	0.457	-1.49		0.333	-0.826	-0.411	-0.3	0.433
-0.681	-0.0834	0.501	0.0472	-1.48		0.369	0.946	-0.479	-0.574	0.237
-0.459	0.0963	0.0509	0.816	-1.38		0.677	0.311	-0.588	-0.665	-0.00618
-0.807	0.0796	0.407	0.469	-1.44		0.165	0.575	-1.03	-0.645	0.142
-0.565	-0.646	1.4	1.25	-1.22		0.104	0.453	-0.981	-0.745	-0.107
-0.74	-0.303	0.564	1.79	-1.29		0.538	1.63	-0.348	-0.455	-0.578
-0.953	0.489	-0.243	3.1	-1.16		0.908	1.05	-0.329	-0.65	-0.514
-0.811	0.517	1.25	2.58	-1.23		0.693	1.27	-0.29	-0.181	-0.404
-0.927	0.769	1	2.03	-1.32		0.81	0.891	-0.151	-0.325	0.0733
-0.963	0.253	0.6	1.87	-1.24		0.855	0.384	-0.159	-0.328	-0.556
-0.742	-0.0187	-0.225	1.7	-0.876		0.875	0.862	-0.00802	-0.689	-0.359
-0.945	-0.495	1.03	1.31	-0.584		0.493	-1.49	0.122	-0.508	0.0338
-0.6	0.174	0.304	2.11	-0.471		0.647	0.259	0.285	-0.303	-0.612
-0.633	0.262	-0.172	1.64	-0.448		0.448	-0.133	0.271	-0.452	-0.713
-0.729	-0.209	0.825	1.77	-0.463		-0.0942	0.281	0.127	-0.498	-0.712
-0.763	0.411	1.26	1.05	-0.435		0.482	0.922	-0.0511	-0.357	-1.01
-0.745	-0.032	-0.0374	0.769	-0.146		-0.162	0.754	-0.193	-0.518	-0.739
-1.09	0.00745	1.25	0.632	0.377		-0.757	-1.13	-0.097	-0.721	-0.916
-0.821	-0.998	0.603	1.07	0.71		0.0726	0.557	-0.211	-0.479	-1.09
-0.78	-0.699	0.486	0.642	0.472		-0.166	0.963	-0.26	-0.386	-0.805
-0.388	-0.829	0.383	0.929	0.427		0.029	0.0357	-0.247	-0.238	-1.1
-0.163	-0.798	0.767	0.9	0.202		-0.0468	0.524	-0.417	-0.203	-1.35
-0.601	-0.436	0.915	1.1	0.218		0.574	-0.246	-0.064	-0.491	-1.2
-0.666	-0.181	1.58	1.12	0.0274		-0.037	0.773	-0.257	-0.405	-0.756
-0.763	-0.553	0.73	1.44	0.178		0.648	0.359	-0.551	-0.386	-0.802
-0.502	-0.649	0.766	1.6	0.765		0.332	1.22	-0.159	-0.627	-0.484
-0.537	-1.72	-0.486	1.27	0.731		0.799	0.617	-0.51	-0.365	-0.706
-0.573	-1.68	0.346	0.845	0.541		0.938	0.842	-0.18	-0.343	-0.65
-0.653	-0.784	-0.0483	0.993	0.479		0.892	-0.148	-0.492	-0.365	-0.475
-1.2	-0.774	-0.622	1.01	0.0639		0.714	0.565	-0.416	-0.363	-0.858
-1.02	-0.932	-0.0485	0.686	0.384		0.915	0.616	-0.478	-0.645	-0.516
-0.918	-1.67	0.28	0.703	0.487		0.576	-0.544	-0.297	-0.682	-0.636
-1.07	-1.73	-1.23	0.504	0.195		1.01	0.663	-0.549	-0.322	-0.613
-0.954	-1.53	-0.404	0.39	0.19		0.887	0.882	-0.259	-0.546	-0.818
-1.01	-1.59	0.235	0.752	-0.156		0.567	-0.379	-0.0889	-0.116	-0.877
-1.33	-2.07	-0.503	0.885	-0.297		0.631	-0.226	-0.462	-0.282	-1.31
-1.04	-1.53	0.262	1.09	-0.479		0.623	0.276	-0.518	-0.196	-1.23
-1.64	-0.884	-1.02	0.957	-0.603		0.379	0.293	-0.306	-0.182	-1.58
-1.53	-0.792	-1.38	0.639	-0.4		0.343	1.18	-0.497	-0.507	-1.52
-1.34	-0.514	-1.16	0.949	-0.328		0.271	0.0532	-0.305	-0.4	-0.888
-1.14	0.371	-0.19	0.497	-0.677		-0.286	0.829	-0.458	-0.31	-1.46
-1.34	0.061	-1.33	0.545	-0.626		0.287	0.111	-0.336	-0.603	-1.19
-1.36	0.741	-1.47	0.732	-0.569		0.0062	0.3	-0.592	-0.229	-0.855
-0.929	0.39	-1.16	0.611	-0.575		0.187	0.747	-0.931	-0.0584	-0.467
-1.17	0.985	-1.42	0.923	-0.746		0.664	1.21	-1.02	0.255	-0.285
-0.792	0.714	-0.779	0.619	-0.818		0.133	0.316	-1.21	0.08	-0.0664
-1.06	0.698	-0.465	0.609	-0.69		0.589	0.294	-0.735	0.153	-0.598
-0.985	0.749	-0.589	1.17	-0.728		0.201	0.143	-0.58	-0.00556	-0.435
-1.15	0.777	-0.232	1.42	-0.706		0.093	-0.618	-0.243	0.217	0.228
-1.22	1.41	-1.6	1.86	-0.782		0.127	0.559	-0.176	-0.204	-0.821
-0.998	1.7	-1.58	1.42	-1.11		0.0698	0.891	-0.241	-0.342	-0.248
-0.675	2.35	-0.736	1.08	-1.04		-0.248	1.69	0.565	-0.379	-0.0473
-0.975	2.38	-1.64	1.4	-0.939		-0.339	0.191	0.146	-0.538	-0.634
-1.01	2.33	-0.578	1.68	-1.12		0.0595	1.24	-0.105	-0.172	-0.234
-1.33	1.87	0.979	1.7	-1.04		-0.578	0.306	0.479	0.139	0.32
-1.33	1.66	0.525	1.37	-1.3		-0.242	0.803	0.485	-0.347	0.537
-0.952	1.96	-0.479	0.808	-1.22		-0.377	0.856	0.376	-0.293	-0.0494
-0.957	1.52	-0.412	0.967	-1.47		0.113	0.597	0.192	-0.179	0.4
-0.796	1.45	0.118	1.09	-1.47		-0.497	1.26	0.366	-0.0202	0.297
-0.529	1.39	1.35	0.611	-1.3		-0.381	0.233	0.188	-0.399	0.26
-0.83	1.16	-2.04	0.253	-1.25		0.047	-0.754	0.422	-0.596	0.714
-0.942	0.999	0.224	1.4	-1		0.299	0.39	0.648	-0.552	0.283
-0.95	0.357	-1.8	1.38	-0.975		0.482	0.786	0.691	-0.322	0.284
-0.366	1.29	-0.291	1.41	-1.01		0.254	-0.511	0.76	-0.789	-0.301
-0.326	0.905	0.0209	1.16	-0.975		0.724	-0.344	0.627	-0.521	0.732
-0.347	1.2	-0.138	1.26	-1.03		0.603	-0.822	0.626	-0.368	0.785
-0.186	1.95	-0.901	1.39	-0.943		0.476	-0.762	0.835	-0.694	1.07
-0.404	1.56	-1.14	1.34	-0.686		0.23	1.19	0.568	-1.03	1.07
-0.784	1.74	0.0597	1.31	-0.646		0.265	-0.755	0.423	-0.869	0.202
-0.858	1.52	0.0501	1.65	-0.782		-0.135	-0.291	0.574	-0.735	1.29
-0.825	1.62	0.782	1.65	-0.855		0.221	-0.0163	0.641	-0.75	0.247
-0.9	2.29	0.629	1.51	-0.993		-0.0491	1.24	0.572	-0.626	-0.0239
-0.845	2.18	-0.25	1.21	-0.925		-0.144	0.547	-0.0677	-0.704	0.446
-1.05	1.23	-0.679	0.277	-1.04		0.299	-0.299	-0.196	-0.791	0.832
-0.937	1.68	-0.22	0.95	-1.03		0.34	0.251	0.338	-0.298	1.3
-1.2	1.62	-0.855	0.787	-0.789		0.546	0.5	0.0542	-0.288	0.9
-1.27	1.12	-0.00759	0.734	-0.831		-0.187	1.29	-0.274	-0.467	0.636
-1.33	1.41	1.05	1	-0.981		0.0947	1.97	-0.372	-0.352	0.36
-1.03	0.94	1.42	1.24	-0.846		-0.467	0.982	0.0515	-0.211	0.946
-1.49	0.55	1.06	0.896	-0.837		-0.0667	1.34	0.152	-0.31	1.52
-1.52	0.303	0.892	1.65	-0.978		-0.0974	0.669	0.108	0.542	1.01
-1.36	0.839	0.737	1.47	-1.09		-0.0823	1.33	-0.348	0.554	0.529
-1.33	0.185	-0.371	1.68	-1.1		-0.134	-1.14	-0.12	0.55	0.195
-1.36	0.283	0.705	1.67	-1.23		-0.432	-0.226	-0.0102	0.509	-0.205
-1.62	-0.264	0.461	1.85	-1.31		-0.381	0.21	-0.191	0.448	-0.0311
-1.11	0.798	0.318	1.5	-1.5		-0.21	0.265	-0.129	-0.00489	-0.338
-0.653	0.908	0.436	1.03	-1.44		-0.421	1.32	-0.119	0.0314	-0.0238
-1.25	-0.118	0.88	1.03	-1.53		-0.839	1.23	0.0535	-0.128	0.442
-1.2	-0.164	0.257	0.686	-1.55		-0.715	-0.12	0.706	0.283	0.346
-1.46	0.557	1.05	1.15	-1.35		-0.347	-0.606	0.253	0.258	0.542
-1.61	-0.633	0.0995	1.11	-1.16		0.0698	1.02	0.258	0.298	0.238
-1.63	0.248	0.712	0.957	-1.14		-0.488	1.23	0.141	0.107	0.625
-1.64	-0.179	0.656	1.61	-1.08		-0.39	0.619	-0.339	0.038	0.936
-1.52	0.0504	1.21	1.67	-0.978		-0.449	1.41	-0.632	0.0932	0.359
-1.66	0.272	0.782	1.05	-1.02		-0.822	1.49	-0.288	0.0969	0.958
-1.59	0.0181	-0.0603	0.722	-1.18		-0.338	1.09	-0.634	0.0275	0.767
-1.78	-0.565	0.173	1.26	-1.35		-0.399	0.302	-0.653	-0.177	0.483
-1.81	-0.371	0.782	0.709	-1.44		-0.345	0.287	-1.08	-0.339	1.28
-1.41	0.329	0.842	0.203	-1.43		-0.382	1.46	-1.48	-0.145	1.07
-1.43	1.22	-0.55	0.693	-1.21		0.0426	-0.389	-1.09	0.217	1.19
-1.42	1.11	0.43	0.455	-1.32		-0.256	-0.144	0.034	0.563	1.16
-1.74	0.786	-0.143	0.619	-1.31		-0.565	2.01	0.834	0.432	1.06
-1.53	0.28	0.359	0.676	-1.34		-0.489	0.596	0.9	0.41	0.935
-1.58	0.819	-1.32	0.923	-1.35		-1.04	-0.00513	1.71	0.749	1.38
-1.58	0.555	-0.517	0.602	-1.34		-0.216	0.503	1.22	0.631	1.06
-1.73	-0.542	-0.39	-0.145	-1.08		-0.0833	1.09	1.24	0.733	0.737
-1.68	-0.578	-0.501	0.156	-1.17		-0.255	-0.451	1.44	0.518	0.68
-1.35	-0.0254	-0.574	-0.00796	-1.17		-0.408	0.54	0.647	0.814	-0.0333
-1.45	-0.424	-0.834	0.48	-0.928		-0.746	0.514	1.03	0.713	-0.00691
-1.29	0.359	-0.161	0.47	-0.962		-0.89	0.477	0.965	0.789	-0.0479
-0.926	0.254	-0.389	0.361	-0.703		-0.711	0.813	1.18	0.883	1.12
-0.535	-0.57	-0.843	0.467	-0.211		0.104	-0.42	1.21	0.872	1.22
-0.916	0.115	-1.68	0.359	-0.0796		-0.389	0.328	0.653	1.07	1.26
-0.534	0.591	-0.231	1.15	0.0195		-0.403	0.731	0.856	1.01	0.948
-0.42	0.534	-1.34	1.98	0.203		-0.295	-0.181	0.725	0.595	0.561
0.116	0.216	-0.259	1.89	0.0733		-0.255	0.658	1.33	1.05	0.0855
-0.37	-0.0768	0.0577	2.45	0.0597		-0.773	-0.605	1.05	0.617	0.211
-0.146	-0.349	0.561	2.11	-0.124		-0.743	0.402	1.14	0.4	-0.0732
0.259	-0.395	0.0838	2.21	-0.199		-0.951	-0.355	0.95	0.496	-0.191
-0.14	-0.635	0.69	1.9	-0.0761		-0.397	-1.39	0.76	0.555	-0.22
-0.0633	-0.415	0.309	1.67	0.278		-0.626	0.00284	0.615	0.514	1.21
-0.2	-0.363	-0.561	1.24	0.0206		-0.85	0.0383	0.802	0.112	1.21
-0.0546	0.137	0.107	0.981	0.0872		-0.936	-0.716	0.642	0.0639	1.14
-0.347	-0.666	0.207	0.331	-0.0348		-1.2	-0.977	0.946	0.259	1.01
-0.0137	-0.541	-0.361	0.628	0.0451		-0.896	-0.9	0.597	0.576	0.663
0.0372	-0.611	-0.111	0.71	-0.102		-0.81	0.471	0.591	0.511	1.18
-0.0698	-0.187	0.844	0.829	-0.0509		-0.753	-0.398	0.486	0.398	0.843
0.225	-0.232	0.835	1.19	-0.157		-0.951	-0.694	0.142	0.587	0.626
0.421	-0.444	0.123	1.16	-0.267		-0.901	0.182	0.165	0.371	0.862
0.558	-0.756	0.199	1.19	-0.167		-0.829	-0.76	0.377	0.629	0.741
0.475	-0.457	-0.668	1.32	-0.348		-1.31	0.383	0.611	0.279	0.885
0.152	-1.59	-0.429	1.58	-0.344		-0.431	0.0296	0.44	0.611	0.957
0.236	-0.279	-2.36	1.59	-0.427		-1.27	0.293	0.674	0.619	0.627
0.118	-1.09	-0.974	0.973	-0.351		-1.19	0.628	0.332	0.446	0.607
-0.262	-0.706	-1.19	1.1	-0.149		-1.14	-0.738	0.577	0.734	1.25
0.229	-0.375	0.0777	1.2	-0.272		-1.48	0.067	0.382	0.431	1.11
-0.0288	-0.327	0.374	1.12	-0.266		-0.79	-1.37	0.528	0.307	0.919
0.073	0.742	-0.0202	0.511	-0.409		-0.86	-0.256	0.098	0.139	1.19
0.048	0.168	0.187	0.762	-0.5		-0.446	0.308	0.204	0.0616	0.82
-0.0473	-0.117	0.253	0.839	-0.642		-0.428	-0.0219	0.41	0.125	1.3
-0.00268	-1.46	0.118	1.07	-0.897		-0.0959	0.0828	0.391	0.0598	1.4
0.0558	-1.28	-0.38	1.42	-0.886		-0.657	0.877	0.56	0.345	1.3
-0.0735	-1.02	1.45	0.773	-0.884		-0.192	-0.00616	0.5	-0.0188	1.01
-0.0554	-1.54	0.502	0.922	-1.05		-0.803	0.11	0.75	0.0832	0.9
0.146	-1.09	0.266	0.707	-1.14		-0.996	-0.354	0.638	-0.019	1.22
0.198	0.185	-0.479	0.735	-1.09		-0.171	0.0505	1.19	-0.178	0.765
0.0644	-0.563	-1.2	1.26	-1.04		-0.243	-0.482	1.23	0.12	0.528
0.646	-0.748	-0.751	0.385	-1.04		-0.785	-0.563	1.68	0.295	1.22
0.617	-1.07	-0.0949	0.736	-1.13		-1.01	0.804	1.58	0.56	1.4
0.576	-1.2	-0.501	1.1	-0.894		-0.535	-0.53	2.13	0.322	1.48
0.284	-1.14	-1.28	0.328	-0.915		-1.02	-0.342	2.37	0.105	1.37
0.471	-0.501	-1.25	0.44	-1.01		-0.773	-0.672	1.73	0.131	1.34
0.225	-1.11	-0.48	0.896	-0.885		-0.853	-0.46	1.67	0.213	1.49
0.259	-1.62	1.22	0.433	-0.551		-0.891	1.25	1.37	-0.374	1.21
0.0231	-1.9	-0.523	0.422	-0.717		-0.828	0.2	1.62	0.323	1.54
0.262	-1.26	0.17	0.4	-0.489		-1.01	0.956	1.41	0.306	1.48
-0.138	-0.512	-0.0472	0.0263	-0.388		-1.03	-0.315	1.6	0.298	1.45
-0.0556	0.443	-0.42	0.168	-0.443		-0.823	-0.556	1.48	0.101	1.66
-0.271	0.313	0.0344	-0.111	-0.427		-0.894	0.248	1.24	0.0138	1.36
-0.132	0.355	-0.345	0.453	-0.414		-0.914	-0.032	1.32	-0.0275	0.992
0.101	0.989	-0.466	0.231	-0.483		-0.557	0.00362	1.45	-0.204	1.08
0.0433	-0.0306	-0.941	-0.284	-0.653		-0.395	0.118	1.4	-0.244	1.11
-0.205	-0.214	-0.47	0.124	-0.455		-0.451	0.549	1.61	-0.131	1.33
-0.313	0.142	0.724	-0.149	-0.311		-0.616	1.27	1.48	0.112	0.506
-0.576	-0.476	-1.02	0.357	-0.133		-0.789	-0.0653	1.36	-0.138	0.632
-0.613	-1.03	0.11	-0.357	-0.279		-0.979	-0.325	1.43	0.206	0.432
-0.109	-0.00754	-0.359	0.00768	-0.244		-0.595	0.598	1.13	0.482	1.28
-0.144	-0.0657	0.141	0.184	-0.363		-1.41	0.119	1.25	0.664	1.18
0.221	1.1	-0.207	0.482	-0.166		-1.05	-0.573	0.934	0.833	1.35
-0.287	1.98	-0.916	-0.0201	-0.394		-0.706	0.365	0.68	0.71	1.2
-0.615	1.52	0.213	0.47	-0.347		-0.789	-0.423	1.05	0.759	1.29
-0.217	1.24	-1.96	-0.502	-0.483		-0.771	-0.574	1.53	0.886	1.11
-0.7	0.466	-0.455	-0.436	-0.629		-0.935	0.841	1.48	0.619	1.33
-1.07	0.832	-0.724	0.049	-0.293		-1.1	0.343	1.47	0.308	0.767
-1.16	0.836	-1.29	-0.0605	-0.0232		-0.184	-1.29	1.62	0.419	0.573
-0.574	0.754	-0.966	-0.187	0.552		-0.722	-1.27	1.14	0.229	1.13
-0.865	0.468	-0.65	-0.222	0.846		-0.465	-1.65	1.36	0.38	1.04
-1.14	0.106	-1.57	-0.0123	0.706		-0.587	-1.62	0.958	0.471	1.57
-0.976	-0.87	-0.581	0.612	0.807		0.0511	-0.219	1.16	0.588	1.24
-1.26	0.116	-0.695	0.216	0.667		-0.376	0.108	1.04	1.1	1.2
-1.13	0.528	0.211	0.243	0.438		-0.458	-1.79	1.04	1.03	1.15
-1.06	-0.365	0.233	0.162	0.349		-0.449	-0.637	1.13	0.846	1.31
-1.16	-0.752	0.409	0.0975	0.341		-0.363	-1.1	0.898	0.66	2
-1.11	-0.583	0.592	0.0245	0.25		-0.543	-0.306	0.909	0.976	1.12
-1.14	-0.559	-0.397	0.313	0.0696		-0.611	-0.252	0.978	0.727	0.643
-1.12	-0.384	0.353	0.637	0.151		-0.624	-1.26	1.48	0.702	0.809
-0.988	-1.07	0.41	0.673	0.0317		-0.453	-2	1.13	0.812	1.01
-0.826	-0.959	-1.64	0.402	-0.145		-0.497	-0.981	0.985	0.734	0.787
-0.971	-1.07	-0.259	0.121	-0.114		-0.229	0.0692	1.23	0.996	0.543
-1.04	-0.824	-0.71	0.165	-0.261		-0.587	-0.219	0.911	1.17	0.377
-1.24	-0.509	-0.172	0.0227	-0.235		-0.301	-0.27	0.686	1.38	0.749
-0.853	-0.942	-0.281	0.489	-0.44		-0.745	-0.718	0.73	1.26	0.165
-1.2	-0.324	0.828	1.19	-0.419		-0.688	-1.51	0.982	1.31	-0.049
-1.2	0.0376	1.05	1.13	-0.243		-0.826	-0.889	1.03	1.26	-0.185
-1.05	-0.269	1.22	1.25	-0.418		-0.515	-1.73	0.872	1.32	-0.0778
-0.952	-0.996	-0.498	1.2	-0.375		-0.152	-0.312	0.768	1.48	0.0814
-1.36	-0.425	-0.151	1.16	-0.203		0.0715	-1.43	0.478	1.05	0.544
-0.968	-1.32	-0.287	1.02	-0.262		0.0253	-1.82	-0.0167	1.08	1.02
-1.22	-0.805	0.656	1.06	-0.319		0.00837	-2.23	-0.249	0.812	1.02
-1.1	-1.23	0.563	0.88	-0.554		-0.177	0.557	0.0838	0.868	0.501
-1.16	-1.26	-0.994	1.27	-0.708		-0.5	-1.03	0.0164	0.776	1.05
-1.21	-0.8	-1.18	0.87	-0.447		-0.494	-0.998	-0.356	0.499	0.0888
-1.35	-0.243	-1.41	0.624	-0.315		-0.908	-1.64	-0.125	0.278	0.171
-0.487	-1.29	-2.15	0.352	-0.562		-0.228	0.00244	-0.0299	0.516	-0.44
-0.669	-0.807	-1.56	-0.113	-0.606		0.272	-0.839	0.263	0.63	-0.584
-0.688	-1.79	-1.59	0.0989	-0.446		0.191	-1.4	0.0953	0.637	-0.488
-1.01	-0.719	-0.438	0.296	-0.465		0.311	-0.902	-0.0527	0.489	-0.167
-0.508	-0.918	-2.06	-0.153	-0.67		-0.0255	-0.509	0.17	0.303	0.495
-0.649	-0.94	-0.816	-0.271	-0.6		-0.187	-0.617	-0.145	0.332	0.172
-0.258	-0.454	-1.84	-0.398	-0.544		-0.157	-0.787	0.405	0.38	0.679
-0.134	-0.418	-1.35	-0.128	-0.605		0.214	-1.6	0.301	0.466	0.142
-0.406	-0.533	-1.86	-0.657	-0.69		0.441	-0.674	0.528	0.466	0.317
-0.293	-0.842	-1.25	-0.574	-0.704		0.744	-2.35	0.736	0.907	0.905
-0.611	-0.973	-1.42	-0.15	-0.812		0.544	0.33	0.725	1.3	0.776
-0.685	-0.52	-0.847	-0.296	-0.99		1.26	0.0703	0.458	0.981	0.498
-0.771	-0.523	-2.96	-0.101	-1.04		0.131	0.307	0.469	1.38	1.2
-0.928	-0.602	-1.68	-0.371	-0.909		0.292	-0.0409	0.342	1.11	0.386
-1.17	-0.348	-0.00927	-0.817	-1		0.153	0.263	0.436	1.09	0.0103
-0.993	0.116	-1.62	-0.954	-1.16		0.0682	-0.126	1.1	1.08	1.18
-1.2	0.0509	-1.63	-0.343	-1.14		0.598	-0.385	0.651	0.92	1.49
-0.847	-0.371	-2.02	-0.685	-1.04		0.499	-0.589	1	0.553	0.958
-0.921	-0.501	-1.37	-0.46	-1.05		0.631	0.293	1.2	0.558	0.994
-0.563	-0.966	-1.12	-0.146	-1.01		0.846	-0.0885	1.85	0.758	0.434
-0.936	0.0938	-1.58	-0.765	-0.934		0.167	0.946	2.28	0.589	0.576
-1	0.498	-2.04	-0.762	-0.791		0.465	-1.28	2	0.878	0.989
-0.848	0.381	-1.1	-0.767	-0.654		0.101	0.13	2.11	0.424	1.29
-1.44	0.208	-1.44	-0.93	-0.823		-0.124	0.0379	2.11	0.7	0.657
-1.31	1.97	-1.34	-0.168	-0.892		0.411	1.09	1.58	0.575	0.791
-1.08	2.38	-1.17	-0.794	-0.969		0.472	-0.781	1.79	0.584	0.776
-1.09	2.33	-2.03	-0.607	-0.934		0.437	-0.281	1.47	0.776	0.895
-1.3	2.6	-2.14	-0.301	-0.872		0.0362	0.628	1.63	0.949	1.16
-1.32	1.79	-0.997	-0.484	-0.907		0.148	-0.793	1.58	0.655	1.29
-1.43	2.07	-0.881	0.714	-0.814		0.623	0.81	1.53	0.719	1.72
-1.2	2.01	-1.77	0.758	-0.634		0.946	-0.0176	1.7	0.961	0.962
-1.17	1.78	-1.98	0.206	-0.463		0.711	-0.216	2.17	0.548	1.58
-1.22	1.9	-1.91	0.0345	-0.377		0.814	1.03	2.02	0.804	0.933
-0.992	1.04	-0.71	-0.118	-0.271		0.851	0.607	2.01	0.428	1.7
-1.27	1.56	-0.101	-0.0481	-0.487		0.578	0.138	1.98	0.604	1.14
-1.56	1.12	-1.42	-0.128	-0.57		0.502	0.399	1.98	0.792	1.33
-1.36	1.17	-0.778	-0.539	-0.675		0.708	0.743	1.94	0.975	0.589
-1.33	0.668	-1.06	-0.0653	-0.631		0.255	0.52	1.66	0.601	0.239
-1.38	0.896	-2.39	0.115	-0.442		0.396	0.622	1.68	0.61	0.811
-1.1	0.975	-2.22	-0.259	-0.3		0.479	-0.252	1.51	0.753	-0.0642
-1.47	-0.0118	-1.57	-0.909	-0.191		0.403	-0.121	1.47	1	0.275
-1.13	1.35	-1.94	-0.31	-0.124		0.884	0.614	1.63	0.92	0.275
-1.56	0.613	-0.168	-0.204	-0.111		0.444	1.27	1.25	1.03	0.671
-1.61	0.361	-1.49	-0.602	-0.0897		0.356	0.877	1.46	1.23	1.04
-1.8	-0.98	-0.45	-0.483	-0.336		0.266	0.324	1.36	1.52	1.47
-1.77	-0.799	-1.65	-0.259	-0.476		0.357	0.931	1.55	1.04	1.4
-1.28	-0.316	-1.36	-0.407	-0.541		-0.34	0.988	1.74	1.38	0.797
-1.23	-0.459	-0.0854	-0.379	-0.569		-0.195	0.638	2.05	0.945	0.741
-1.58	-0.0313	-1.34	-0.471	-0.454		-0.0975	1.17	2.42	0.989	1.15
-1.25	0.406	-1.17	-0.773	0.048		0.235	1.13	2.4	0.655	0.647
-1.57	1.21	-2.11	-0.677	0.0234		0.388	2.03	2.45	0.677	0.809
-1.65	1.11	-1.81	-0.451	-0.0516		0.37	1.83	2.31	0.466	1.07
-1.77	0.661	-2.5	-0.202	0.00257		0.521	0.768	2	-0.0501	1.65
-1.64	0.435	-2.12	-0.601	0.189		-0.0353	0.994	2.03	-0.0306	1.33
-1.48	0.563	-1.12	-0.372	-0.0343		0.431	1.77	1.73	0.145	0.942
-1.2	0.35	-1.16	-0.486	0.00208		0.0334	1.04	1.86	-0.405	1.62
-1.37	0.196	-2.32	0.322	0.0239		-0.197	1.98	1.57	-0.0732	1.12
-1.43	0.268	-1.75	-0.1	0.194		-0.503	1.9	1.48	-0.0395	0.536
-1.28	-0.379	-2.11	-0.13	0.339		-0.0412	1.37	1.58	0.0222	0.322
-0.973	-0.731	-1.53	0.735	0.231		-0.593	1.27	1.55	0.0477	0.232
-0.887	-0.872	-0.297	-0.0524	0.254		-0.32	0.784	1.6	0.000998	0.372
-0.905	-0.644	-1.73	0.229	0.303		-0.447	1.8	1.33	-0.0451	0.352
-0.721	-0.542	-2.92	0.341	0.535		-0.611	1.68	1.76	-0.498	1.08
-0.693	0.5	-2.65	0.524	0.703		-0.396	0.759	1.47	-0.689	1.47
-1.04	0.0989	-2.79	0.534	1.49		-1.25	1.04	1.46	-0.0566	1.22
-1.06	0.608	-2.05	0.941	2.4		-1.11	1.37	1.73	0.127	1.18
-0.608	0.71	-2.25	0.418	2.35		-0.425	0.296	1.4	0.271	1.32
-0.374	0.502	-1.81	0.124	2.32		-0.881	1.09	1.52	0.0489	1.2
-0.543	0.174	-0.694	0.422	2.11		-0.385	1.6	1.86	0.471	1.48
-0.018	0.283	-1.47	0.194	2.03		-0.00189	1.58	1.52	0.44	1.37
-0.261	0.00927	-1.01	0.295	1.88		-0.312	1.72	1.48	0.306	1.64
-0.31	-0.0713	-0.718	0.056	1.77		-0.362	1.76	1.61	-0.26	1.17
-0.409	0.243	-1.3	-0.0756	1.79		-0.0602	1.43	1.31	-0.0138	1.48
-0.662	-1.37	-1.13	-0.0318	1.34		-0.612	1.95	1.6	0.0639	0.0915
-0.288	-0.686	-2.04	0.245	1.17		-0.603	1.49	1.46	0.0441	0.103
-0.615	-0.929	-2.23	-0.00623	1.22		-0.369	1.93	1.63	-0.125	-0.109
-0.691	-0.669	-2.4	-0.105	1.55		0.194	3.68	1.8	-0.0131	0.14
-0.488	-0.482	-1.63	-0.0428	1.55		-0.169	2.34	1.17	-0.0435	0.488
-0.786	-0.0881	-1.21	-0.0854	1.37		0.331	2.64	1.25	-0.217	0.777
-0.555	0.298	-1.98	-0.178	1.42		0.0166	3.15	1.02	-0.0417	0.192
-0.783	1	-1.84	0.0467	1.52		0.452	1.21	0.957	0.19	-0.371
-0.567	0.543	-2	0.211	1.02		-0.228	1.47	0.499	0.371	-0.187
-0.856	0.0856	-2.18	-0.00508	1.07		-0.274	2.12	0.825	0.285	-0.193
-0.783	-0.752	-2.92	0.255	1.26		0.0483	2.33	0.989	0.196	-0.227
-0.637	-0.245	-2.94	0.413	1.08		-0.224	1.21	0.846	0.124	-0.319
-0.473	0.0191	-1.77	-0.135	0.928		-0.192	0.808	0.761	0.195	-0.0664
-0.207	0.257	0.226	0.0458	0.897		0.652	1.52	0.589	0.431	0.191
-0.59	-0.0544	-0.794	0.0577	0.832		-0.268	1.99	0.516	0.295	0.0721
-0.422	0.146	-2.37	-0.241	0.868		0.0151	2.67	0.522	0.243	-0.475
-0.975	-0.198	-1.9	0.157	0.993		-0.34	1.76	0.292	0.293	-0.0586
-0.643	0.0357	-2.1	-0.131	1.02		-0.166	1.47	0.0932	0.269	-0.447
-0.501	0.168	-1.64	-0.455	0.987		0.0662	1.06	0.057	0.438	-0.414
0.343	0.37	-2.1	-0.429	0.821		0.151	2.42	0.622	0.61	-0.373
0.137	0.596	-1.03	-0.0515	0.786		0.863	1.32	0.4	0.537	0.132
0.244	-0.38	-1.52	-0.633	1.03		0.303	1.81	0.667	0.374	0.13
0.164	-0.603	-0.681	-0.568	1.11		-0.147	2.33	0.588	0.438	-0.581
0.067	-0.354	-2.96	-0.517	1.08		0.552	1.66	0.736	0.299	-1.05
0.0377	-0.366	-2.44	-0.349	0.871		0.108	1	0.451	0.206	-1.16
0.00558	-1.15	-1.86	-0.462	1.08		-0.0353	1.41	0.358	0.298	-1.19
-0.158	-0.974	-1.91	-0.369	1.24		-0.0626	1.19	0.825	0.499	-0.893
-0.387	-1.07	-2.75	-0.908	1.52		0.352	1.96	0.702	0.205	-0.858
-0.412	-0.852	-1.48	-0.31	1.35		0.465	1.33	0.337	0.392	-0.613
-0.602	-1.29	-1.25	-0.554	1.27		-0.202	0.364	0.641	0.364	0.0724
-0.344	-1.03	-1.23	-0.39	1.25		0.506	0.755	0.69	-0.0793	0.788
-0.0746	-0.977	-2.41	-0.212	1.11		1.05	1.73	0.438	-0.199	0.518
-0.368	-0.917	-2.46	-0.412	1.01		0.598	1.97	0.462	-0.0616	0.756
-0.299	-1.16	-1.65	-0.205	0.953		0.627	2.01	0.639	-0.0935	1.11
-0.531	-0.655	-1.04	-0.247	0.653		0.344	2.55	0.343	-0.0691	0.858
-0.534	-1.84	-1.37	0.184	0.652		0.185	2.19	0.444	-0.228	0.368
-0.923	-2.17	-1.34	0.774	0.776		0.453	3.16	0.468	0.224	0.397
-0.997	-1.64	-2.08	0.788	0.711		-0.0309	2.63	0.313	0.464	0.956
-0.826	-1.7	-2.12	0.632	0.596		-0.43	2.6	-0.145	0.541	0.932
-0.464	-1.15	-1.57	0.979	0.376		0.308	2.76	0.225	0.386	1.03
-0.808	-1.62	-1.29	0.827	0.4		0.278	2.74	0.0631	-0.0295	0.155
-1.02	-1.18	-1.81	0.355	0.422		0.894	2.42	0.203	1.18	0.0483
-0.929	-0.88	-1.72	0.251	0.4		0.641	2.03	0.0996	1.07	0.271
-1.13	-0.966	-0.499	0.159	0.363		0.798	2.12	-0.206	1.16	0.637
-0.457	-1.21	-2.52	0.278	0.454		0.975	2.68	-0.0523	1.05	1.01
-0.638	-1.91	-1.02	0.383	0.557		1.18	2.05	0.285	0.616	0.379
-0.494	-1.32	-0.979	-0.0809	0.546		0.913	2.36	0.088	0.808	0.902
-0.824	-1.2	-2.14	0.279	0.489		1.19	2.32	0.0421	1	1.18
-0.633	-0.922	-2.74	0.123	0.31		1.18	1.94	0.0488	0.791	1.18
-0.871	-0.764	-0.608	0.713	0.488		1.25	1.2	0.0966	0.77	0.641
-1.1	-1.32	-1.05	0.251	0.678		1.19	1.8	0.0463	0.827	0.225
-1.28	-1.32	-1.44	0.404	0.618		1.36	1.05	0.103	0.565	0.736
-1.68	-1.34	-1.18	0.56	0.535		1.04	2.25	0.00526	0.643	1.32
-1.17	-1.36	-0.646	1.09	0.44		0.767	1.66	-0.45	0.578	1.25
-0.765	-2.39	-2.32	0.714	0.269		0.721	0.703	-0.344	0.461	1.5
-0.552	-2.37	-1.84	0.508	0.255		0.714	2.29	0.253	0.286	1.82
-0.624	-2.26	-0.716	0.895	0.265		0.346	2.64	0.0613	0.067	2.24
-0.301	-2.44	-0.743	0.76	0.264		0.501	3.06	-0.296	0.381	1.99
-0.344	-2.64	-0.484	1.26	0.57		0.26	3.83	-0.705	0.622	1.71
-0.363	-1.72	-1.02	0.96	0.553		0.721	4.21	-0.652	0.579	2.11
-0.266	-1.61	-0.513	1.46	0.752		0.713	2.95	-0.919	0.309	2.09
-0.427	-2.19	-1.92	1.46	0.778		0.707	3.71	-1.05	-0.178	1.78
-0.236	-1.51	-0.998	1.35	0.585		0.412	3.71	-0.421	0.26	1.74
-0.432	-1.16	-0.92	1.68	0.618		0.769	2.53	-0.0653	-0.182	1.66
-0.00294	-1.57	-0.495	1.49	0.646		0.869	3	-0.105	-0.193	1.77
-0.412	-1.37	-0.375	1.48	0.579		0.745	3.02	0.343	-0.211	2.25
-0.32	-0.918	-0.79	0.865	0.362		0.418	2.6	-0.128	-0.307	2.51
-0.28	-0.809	-0.536	0.917	0.509		0.353	1.31	0.0496	-0.356	2.14
-0.184	-0.393	-1.61	0.703	0.692		-0.101	2.71	-0.424	-0.61	1.86
-0.503	-0.551	-0.9	0.342	0.707		-0.161	2.66	-0.194	-0.805	2.01
-0.413	-0.526	-0.64	0.227	0.605		0.837	1.95	-0.622	-0.519	2.36
-0.357	-0.407	-0.105	0.311	0.863		0.177	2.67	-0.629	-0.604	1.89
-0.463	-0.324	-0.817	-0.217	0.622		0.531	1.44	-0.209	-0.796	1.49
-0.167	-0.517	-0.153	0.889	0.534		0.77	2.45	-0.00149	-0.39	1.73
-0.315	-0.501	-0.223	1.38	0.57		1.03	2.4	-0.2	-0.272	1.87
-0.162	0.0033	0.136	1.21	0.527		0.654	1.93	0.429	-0.231	1.83
-0.334	0.166	-0.057	1.89	0.31		0.927	2.97	0.343	-0.154	1.86
-0.4	0.58	-0.241	1.28	0.289		0.516	2.44	0.264	-0.217	1.51
-0.52	0.23	0.36	0.442	0.397		0.922	2.3	0.0439	-0.362	1.76
-0.655	0.558	-0.217	0.483	0.424		1.15	2.49	-0.197	-0.503	2
-0.569	0.113	0.178	0.629	0.474		0.935	2.63	-0.225	-0.358	2
-0.306	0.243	0.402	-0.491	0.571		0.763	2.13	0.0751	0.0042	1.71
-0.554	0.142	-0.689	-0.414	0.762		0.669	2.37	0.303	-0.26	1.88
-0.527	0.1	-1.5	-0.118	0.721		0.918	2.02	0.292	-0.238	2.14
-0.745	-0.57	-0.248	0.167	0.649		0.595	0.676	-0.0488	-0.0481	1.86
-0.634	-0.466	0.224	0.0737	0.708		0.508	2.5	0.19	-0.141	1.36
-0.838	-0.491	0.592	0.139	0.423		0.327	2.09	0.014	-0.08	1.5
-1.12	-0.222	0.983	0.182	0.299		0.458	1.46	-0.197	-0.202	0.94
-0.822	-0.55	-0.708	0.269	0.346		0.637	2.18	-0.577	-0.612	1.96
-1.03	0.432	-0.442	0.248	0.424		0.669	1.25	-0.747	0.191	1.67
-0.911	0.404	0.546	-0.258	0.151		0.498	1.26	-0.516	-0.0706	1.57
-1.02	0.474	0.419	-0.298	-0.0265		0.348	1.02	-0.443	-0.455	1.18
-0.907	1.06	1.08	0.258	0.105		0.398	1.64	-0.847	-0.465	1.52
-0.39	1.05	1.35	0.56	0.0442		0.613	1.39	-0.594	-0.34	1.36
0.721	1.62	0.477	0.254	0.189		0.751	0.265	-0.333	-0.312	1.57
0.793	1.9	-0.683	0.973	0.361		1.39	1.39	-0.0411	-0.271	1.51
0.864	1.45	-0.657	1.94	0.249		1.48	-0.0404	-0.385	0.0582	1.39
0.772	1.22	-0.873	2.1	0.266		1.58	0.877	-0.606	-0.692	1.92
0.375	1.22	-1.16	1.91	0.371		1.54	0.242	-0.112	-0.216	1.61
0.23	1.23	-1.05	2.25	0.31		1.77	1.76	-0.454	-0.175	1.27
0.147	1.29	-0.592	2.13	0.225		1.84	0.488	-0.514	-0.61	0.914
0.232	1.16	-0.0961	1.17	0.0689		2	0.524	-0.436	-0.3	1.46
0.00604	0.868	0.937	0.89	0.157		2.01	0.0932	-0.162	-0.0736	0.398
0.239	0.546	0.178	0.721	-0.106		1.48	0.678	-0.0888	-0.303	0.981
0.422	0.818	-1.28	0.877	-0.152		1.4	1.64	-0.492	-0.635	0.376
1.1	0.47	-0.944	1.13	-0.0595		0.967	1.28	0.255	-0.111	0.807
0.486	0.208	-1.9	0.844	-0.229		1.35	1.13	1.15	-0.219	0.598
0.387	0.57	-1.25	1.5	-0.247		1.68	1.84	0.959	-0.168	0.945
0.0947	0.28	-0.966	1.04	-0.367		1.61	1.33	0.77	-0.0521	1.3
0.315	0.87	-0.814	1.06	0.0226		1.33	1.24	0.627	0.0718	1.29
0.723	0.869	-1.94	0.72	0.226		1.05	1.42	0.577	-0.228	0.905
0.146	2.08	-1.32	0.665	0.556		0.554	0.624	0.554	-0.0367	1.08
0.225	1.05	0.384	0.742	0.528		0.483	0.0571	0.34	-0.592	1.35
-0.00556	0.863	-1.68	0.446	0.482		1.13	0.961	0.495	-0.37	1.42
-0.282	0.424	-1.96	0.263	0.381		0.91	0.658	0.487	-0.628	1.57
-0.187	0.305	-1.47	0.775	0.548		0.518	0.793	-0.0156	-0.757	1.51
0.363	0.539	-1.4	0.217	0.563		1.05	0.681	-0.0927	-0.636	1.93
0.544	0.252	-2.12	0.529	0.535		1.39	0.693	0.0245	-0.411	1.51
0.534	0.134	-0.614	0.417	0.637		0.852	1.8	-0.0212	-0.426	1.47
0.0119	-0.586	0.873	0.268	0.836		0.85	1.56	-0.568	-0.16	1.64
0.0871	-0.224	0.247	-0.139	0.837		0.356	1.81	-0.616	0.102	1.22
-0.0334	0.523	-1.24	0.129	0.888		-0.156	1.15	-0.799	0.0782	1.48
-0.326	0.587	-0.908	0.205	0.871		0.33	1.85	-0.107	0.323	1.22
-0.22	1.78	-1.15	0.334	0.689		0.399	0.349	-0.0508	0.831	1.36
-0.135	2.37	-0.517	0.742	0.73		0.1	1.52	0.204	0.814	1.32
0.204	2.03	-0.209	0.529	0.556		0.41	1.29	0.267	0.981	0.877
0.244	1.61	-0.41	0.723	0.581		0.443	0.942	0.112	0.895	1.33
-0.0455	1.07	-0.567	1.26	0.29		0.818	0.936	0.0826	0.736	0.743
-0.074	1.48	0.3	0.726	0.388		1.23	0.992	0.0975	0.821	1.18
-0.207	1.73	-1.04	0.991	0.311		2.11	1.23	-0.00301	0.486	1.48
-0.505	1.59	0.422	0.808	0.0505		2.81	0.655	0.0492	0.717	0.974
-0.312	1.63	-0.589	0.321	-0.0265		3.13	0.053	0.11	0.552	0.635
0.0258	1.37	0.283	-0.00673	-0.0454		3.56	-0.168	0.112	0.109	1.17
-0.372	1.97	0.215	0.532	0.179		3.06	-0.00402	0.215	0.462	0.73
-0.416	2.54	0.464	0.373	0.265		3.18	0.251	0.00034	0.201	1.31
-0.461	1.82	-0.404	0.421	0.423		2.6	0.34	0.256	-0.134	0.798
-0.505	1.11	0.965	-0.0622	0.565		2.67	0.61	-0.467	-0.314	1.13
-0.233	0.404	-0.47	-0.62	0.735		2.29	0.83	-0.744	0.108	0.86
-0.33	0.785	-0.441	-0.336	0.753		2.21	1.69	-0.658	0.134	0.633
-0.0517	1.19	-0.508	-0.471	0.799		1.82	-0.0796	-0.793	-0.0493	0.799
-0.0331	0.344	-0.865	-0.324	0.72		1.7	0.644	-1.06	-0.151	1.01
-0.358	1.28	0.616	-1.01	0.636		1.3	0.642	-0.645	0.0337	1.79
-0.159	0.434	-1.12	-0.469	0.66		1.61	1.49	-0.415	0.256	2.34
-0.271	0.49	-1.23	-0.493	0.525		2.17	0.804	-0.732	0.0561	2.73
-0.413	0.409	-0.713	-0.3	0.815		2.21	1.12	-0.59	0.285	2.5
-1.06	0.556	-1.06	0.564	0.8		1.7	1.63	-0.773	0.516	2.56
-0.672	-0.00132	-0.451	1.9	0.738		1.29	1.29	-0.658	0.145	2.3
-0.503	0.24	0.21	1.83	0.708		1.45	1.05	-0.471	-0.0673	2.41
-0.377	0.207	0.377	1.19	0.598		1.31	0.691	-0.522	0.0741	1.77
-0.263	0.379	-0.226	1.55	0.547		1.35	0.692	-0.827	0.0165	1.95
-0.569	-0.482	-0.452	0.805	0.401		1.36	1.86	-0.763	-0.228	1.86
-0.624	0.36	0.545	0.684	0.298		1.15	0.147	-0.409	-0.146	2.71
-0.37	0.855	-0.634	0.861	0.192		0.997	-0.253	-0.657	-0.11	2.31
-0.444	0.743	0.664	0.921	0.245		0.685	-1.02	-0.702	-0.224	2.1
-0.706	0.883	0.81	0.408	0.0895		1.09	0.497	-0.839	-0.499	1.73
-0.968	0.688	0.63	0.314	0.0779		0.336	1.02	-0.73	-0.178	1.87
-0.744	-0.00117	0.0659	0.561	0.291		0.34	-0.505	-0.813	-0.264	2.3
-0.464	-0.212	-1.01	0.954	0.244		-0.091	0.196	-0.923	-0.15	2.27
-0.323	0.127	-0.736	1.32	0.434		-0.0504	0.595	-0.713	-0.139	2.36
-0.511	0.9	-1.29	0.888	0.462		0.00629	0.0604	-0.755	0.0288	2.59
-0.309	1.11	-1.01	0.656	0.513		-0.143	-0.418	-0.851	0.454	2.07
-0.214	1.21	0.626	0.872	0.397		-0.133	1.55	-0.531	0.17	2.06
-0.479	0.862	-1.57	1.07	0.585		-0.269	0.925	-0.375	0.388	2.65
-0.525	-0.0416	0.245	0.76	0.627		-0.743	1.07	-0.378	0.0338	2.1
-0.515	0.355	0.258	0.582	0.491		-1.13	1.79	-0.313	0.354	2.23
-0.369	0.534	0.0285	0.501	0.549		-0.553	1.48	-0.249	0.463	1.96
-0.568	0.159	-0.638	0.645	0.774		-0.883	2.22	-0.0554	1.15	2.22
-0.561	-0.0757	-0.409	0.673	0.608		-0.903	-0.0543	0.025	1.04	1.9
-0.622	0.43	0.777	0.799	0.401		-0.641	-0.0361	-0.247	0.776	1.7
-0.739	0.64	0.718	0.941	0.499		-0.448	1.1	-0.305	0.659	2.27
-0.83	1.05	1.01	1.23	0.406		-0.911	0.183	0.0612	0.638	2.73
-0.814	0.577	1.95	1.47	0.281		-0.695	1.15	0.269	0.782	3.03
-0.951	0.618	-0.545	0.526	0.359		-0.632	0.559	0.287	0.813	2.69
-0.967	0.683	0.51	-0.0227	0.165		-0.721	-0.538	0.24	0.819	3.24
-1.21	0.216	0.835	0.627	0.0724		-0.382	0.274	0.0186	0.569	2.85
-1.17	0.346	0.868	0.304	0.146		-0.4	0.198	-0.0485	0.59	3.16
-1.41	0.234	1.98	-0.172	0.0718		-0.666	-0.893	-0.105	0.136	2.73
-1.4	0.791	1.93	-0.0865	0.175		-0.846	0.274	0.0441	0.448	2.93
-1.19	0.866	1.49	0.105	0.0322		-0.864	1.02	-0.32	-0.418	2.85
-0.987	0.164	0.937	-0.318	-0.0359		-0.308	0.00646	-0.0596	-0.384	2.82
-1.39	0.474	0.0598	0.0362	-0.0853		-0.952	0.845	-0.268	0.0988	2.56
-1.18	-0.235	1.2	-0.274	0.0105		-1.19	1.64	0.0268	-0.244	2.67
-1.67	0.637	1.8	0.41	-0.0498		-1.27	1.88	0.194	-0.232	2.16
-1.49	1	1.24	-0.212	-0.0663		-0.938	0.21	-0.219	-0.449	2.07
-1.35	1.08	2.34	0.252	-0.0279		-0.412	0.808	-0.205	-0.597	2.3
-1.55	0.936	1.41	-0.415	-0.192		-0.727	-0.678	-0.426	-0.395	2.03
-1.96	0.764	1.01	0.0856	0.0161		-0.399	1.11	-0.633	-0.0796	1.62
-1.25	0.9	1.7	-0.178	-0.182		-0.56	0.504	-1.06	0.121	1.91
-0.943	0.929	1.74	-0.066	-0.198		-0.741	0.511	-1.12	-0.0926	1.65
0.939	-0.646	0.499	0.22	-0.256		-0.653	1.58	-0.899	-0.253	0.966
1.09	0.302	0.242	0.139	-0.522		-0.626	0.476	-0.649	-0.139	1.12
0.963	0.602	1.06	0.316	-0.539		-0.911	0.034	-0.628	-0.358	0.795
0.8	0.482	0.98	0.329	-0.252		-1.91	1	-0.98	-0.301	1.51
0.929	0.742	0.984	-0.0655	-0.362		-1.19	1.06	-0.472	0.0744	1.41
0.329	-0.325	0.813	-0.148	-0.562		-1.15	1.43	-0.835	-0.0268	1.19
0.29	0.26	0.566	-0.348	-0.687		-1.04	1.23	-1	-0.132	1.47
0.345	0.225	0.609	-0.891	-0.53		-1.19	0.0961	-0.594	-0.513	1.62
0.401	-0.157	1.35	-0.517	-0.651		-1.33	0.902	-0.822	-0.407	1.34
0.353	-0.489	0.409	-0.144	-0.782		-1.39	2.24	-1.01	-0.391	1.45
0.251	0.175	1.22	-0.255	-0.791		-1.58	1.78	-1.06	-0.604	1.39
-0.0303	0.329	-0.587	-0.576	-0.612		-2.15	1.41	-1.12	-0.734	1.52
0.115	-0.0553	-0.33	-1.08	-0.4		-1.7	0.334	-0.84	-0.542	1.97
-0.207	-0.0497	0.694	-0.803	-0.477		-1.25	1.02	-1.27	-0.0437	1.2
-0.796	0.268	-0.256	-0.634	-0.38		-1.54	-0.631	-0.797	-0.0361	1.12
-0.894	-0.139	0.098	-1.03	-0.583		-1.85	0.713	-0.952	-0.42	0.994
-0.445	-0.192	0.544	-0.248	-0.434		-1.56	1.32	-0.961	-0.478	1.14
-0.76	-0.597	-0.53	-0.365	-0.459		-1.45	0.148	-0.878	-0.226	1.65
-0.653	-0.553	-0.178	-0.0766	-0.455		-1.14	0.989	-1	-0.545	1.24
-0.505	0.06	-0.0214	0.284	-0.478		-0.913	-0.0645	-1.26	-0.623	1.09
0.294	-0.0101	1.15	-0.339	-0.494		-0.946	0.93	-0.715	-0.264	1.04
0.411	0.0354	0.237	-0.205	-0.391		-1.24	1.39	-0.172	-0.344	1.22
0.163	-0.33	0.35	-0.249	-0.429		-0.938	0.397	-0.399	-0.391	1.28
0.0508	-0.498	-0.417	0.125	-0.409		-1.13	0.699	-0.607	-0.679	0.355
-0.395	-0.654	0.177	0.833	-0.56		-1.48	1.16	-0.836	-0.871	0.283
-0.369	-0.376	0.122	0.247	-0.7		-1.4	0.311	-0.95	-0.723	0.913
-0.514	-1.25	-0.078	0.142	-0.439		-1.15	0.54	-0.857	-0.788	0.624
-0.572	-0.613	0.758	0.537	-0.297		-1.38	1.08	-1.11	-0.763	0.856
0.037	-0.419	-0.975	1.2	-0.315		-1.3	0.859	-1.26	-0.442	1.17
-0.0651	-0.285	0.777	2.19	-0.366		-1.37	0.2	-0.975	-0.202	1.52
0.0711	-0.779	-0.428	2.06	-0.318		-0.874	1.16	-0.956	-0.491	0.678
-0.113	-0.984	0.389	2.31	-0.304		-1.3	-0.205	-1.15	-0.333	0.84
-0.17	-0.917	0.311	1.91	-0.464		-0.69	1.01	-1.27	-0.413	0.867
-0.132	-0.533	-0.284	2.75	-0.437		-0.559	-0.174	-1.37	-0.273	0.415
0.115	-0.62	0.678	1.98	-0.502		-0.97	1.83	-1.31	-0.688	0.493
-0.0864	-0.816	0.25	1.96	-0.291		-0.735	1.76	-0.938	-0.741	1.05
0.00547	-0.123	0.287	1.98	-0.178		-0.777	0.958	-1.24	-0.518	0.949
-0.503	-0.518	0.746	2.24	-0.294		-1.16	1.72	-0.564	-0.512	0.664
-0.118	-0.84	0.366	1.49	-0.269		-0.319	-0.0808	-0.765	-0.496	0.315
-0.427	-0.983	-0.233	1.38	-0.382		-0.645	0.127	-0.865	-0.89	0.665
-0.156	0.388	0.737	1.48	-0.509		-0.0151	0.407	-1.16	-0.441	1.1
-0.241	-0.49	0.374	0.793	-0.493		-0.277	1.63	-0.802	-0.627	0.905
-0.264	-0.316	0.522	1.5	-0.561		-0.901	0.373	-0.907	-0.325	1.11
-0.779	-0.382	0.0146	0.663	-0.491		-0.878	0.533	-1.11	-0.616	0.348
-0.0858	-0.454	0.461	0.512	-0.516		-0.313	-0.422	-1	-0.398	0.193
0.0439	-0.39	0.485	-0.0415	-0.758		-0.648	-0.619	-1.28	-0.185	0.0903
-0.143	-0.259	0.0386	0.932	-0.749		-0.921	-0.0647	-0.871	-0.578	-0.195
0.00562	-0.427	0.144	1.08	-0.653		-1.12	0.843	-0.868	-0.102	0.0306
-0.318	-0.216	0.21	0.811	-0.759		-1.18	1.15	-1.07	-0.0572	0.501
-0.0383	-0.196	-0.593	1.15	-0.815		-0.594	-0.421	-1.01	-0.295	0.258
0.0586	-0.592	0.473	1.29	-0.733		-0.907	1.21	-1.27	-0.358	0.71
0.156	-0.38	-0.125	1.43	-0.788		-1.27	1.55	-0.752	-0.091	0.176
-0.0256	-0.169	-0.0799	0.708	-0.841		-1.44	0.163	-0.783	-0.0211	0.162
0.017	0.00898	0.801	1.12	-1.05		-1.05	-0.0403	-0.407	-0.124	-0.493
0.198	0.466	-1.24	0.968	-0.858		-1.43	0.718	-0.404	-0.56	0.0622
-0.225	0.242	-0.264	0.415	-0.999		-1.35	0.349	-0.496	-0.534	0.394
-0.566	0.153	0.588	1.2	-1.17		-1.01	0.165	-0.172	-0.431	0.522
-0.158	-0.0943	1.39	1.06	-1.17		-0.63	0.511	-0.426	-0.194	0.547
-0.254	-0.212	0.767	0.863	-1.2		-0.863	1.12	-0.479	-0.78	0.815
-0.493	0.352	-0.519	0.566	-1.27		-1.3	-1.07	-0.534	-0.394	0.609
-0.38	-0.322	0.731	0.698	-1.28		-0.271	-0.622	-0.292	-0.528	0.38
-0.448	-0.269	0.718	0.537	-1.23		-0.193	-0.524	-0.11	-0.39	0.385
-0.279	0.178	-0.542	0.631	-1.13		-0.694	0.0543	-0.241	-0.647	0.122
-0.442	0.0942	-1.73	0.698	-1.28		-0.751	0.417	-0.582	-0.627	0.382
-0.299	0.874	-1.8	0.512	-1.09		-0.59	-0.188	-0.637	-0.589	0.389
-0.297	-0.0824	0.132	0.757	-0.999		-0.777	0.295	-0.186	-0.344	0.302
-0.793	-1.42	-1.09	1.56	-0.641		-0.702	0.211	-0.623	-0.123	0.00765
-0.464	-0.0631	-2.13	0.303	-0.53		-0.0461	-0.759	-0.799	-0.293	0.0668
-0.748	-0.14	-0.571	0.964	-0.371		-0.386	-0.022	-0.855	-0.326	-0.193
-0.645	-0.239	-1.1	1.05	-0.516		-0.53	-1.11	-0.525	-0.367	-0.0352
-0.905	0.0357	-0.743	0.571	-0.431		-0.487	0.45	-0.865	-0.36	0.125
-0.826	-0.799	-1.62	0.449	-0.476		0.375	-0.838	-0.675	-0.453	0.0179
-0.988	-1.52	-0.99	0.721	-0.418		-0.646	0.14	-0.611	-0.423	0.757
-0.898	-0.746	-0.828	0.442	-0.625		-0.543	-0.833	-0.237	-0.583	0.778
-0.782	-0.767	-1.56	0.447	-0.382		-0.684	-1.26	0.0335	-0.513	0.454
-1.12	-0.656	-0.651	0.648	-0.23		-0.548	-0.195	-0.137	-0.525	0.173
-0.951	-0.998	-1.38	0.584	-0.126		-0.193	0.513	-0.219	-0.335	0.416
-0.839	-0.244	-0.539	0.361	0.498		-0.44	-0.112	-0.803	-0.715	0.785
-1.01	-0.455	-1.7	0.323	0.635		-0.751	0.46	-0.922	-0.461	0.574
-1.19	-0.579	-2.79	-0.212	0.717		-0.808	-0.483	-0.753	-0.591	0.616
-1.44	-0.395	-0.907	-0.0947	0.75		-0.938	-0.019	-0.461	-0.867	0.216
-1.55	0.576	-0.711	-0.311	0.652		-0.933	-0.398	-0.666	-0.903	0.607
-1.19	0.0259	-0.526	-0.105	0.378		-0.912	-0.822	-0.568	-0.791	0.722
-0.905	-0.394	-1.21	-0.581	0.547		-0.899	-0.432	-0.0698	-0.811	0.986
-0.329	0.222	-0.157	-0.28	0.703		-0.533	0.418	-0.201	-0.735	1.71
-0.292	-0.525	-0.0772	-0.262	0.574		-1.2	1.03	-0.212	-0.867	1.13
-0.652	0.106	0.357	0.265	0.361		-1.15	0.453	0.0993	-0.891	1.34
-0.298	0.0182	-0.608	0.162	0.246		-1.3	-0.0818	0.0346	-0.384	1.15
-0.387	-0.685	-0.291	0.791	0.0184		-1.19	0.304	0.215	-0.36	1.26
-0.302	-0.446	-0.0474	0.7	0.00436		-1.31	-0.207	0.189	-0.546	1.25
-0.52	-0.344	0.198	0.862	-0.00689		-1.66	-0.565	0.198	-0.793	1.35
-0.458	0.0496	0.441	0.636	0.00167		-1.55	-0.366	0.505	-0.454	1.3
-0.59	-0.382	-0.179	0.394	0.0697		-1.72	0.0957	0.237	-0.51	1.4
-0.629	-0.829	-0.484	0.327	0.283		-1.88	0.816	0.255	-0.636	1.39
-0.815	-0.474	0.615	0.0924	0.146		-2.24	-0.26	0.299	-0.393	1.42
-0.767	-0.177	-0.291	-0.457	0.127		-1.54	-0.696	0.714	-0.261	0.915
-0.776	-0.899	-0.667	0.0322	0.334		-1.85	-0.442	0.389	-0.386	0.777
-1.2	-0.907	-0.29	-0.258	1.15		-1.52	0.882	0.465	-0.157	-0.375
-0.798	-1.09	-0.39	-0.353	1.46		-1.63	-0.481	0.019	-0.442	-0.201
-0.686	-0.612	0.377	-0.758	1.4		-1.05	0.778	0.19	-0.162	-0.223
-0.544	-0.948	-0.837	-0.154	1.3		-1.44	0.0166	-0.029	-0.497	-0.0841
-0.697	-0.351	-1.09	-0.596	1.41		-1.22	0.516	0.162	-0.554	0.254
-0.838	-0.212	-0.836	-0.605	1.15		-1.33	-0.591	0.135	-0.732	0.384
-0.747	0.231	-1.26	-0.898	0.909		-1.29	0.655	0.0548	-0.436	-0.289
-0.547	-1.04	-0.195	-0.0466	0.946		-1.4	-0.632	0.0492	-0.851	-0.545
-0.347	-0.834	-1.59	-0.676	0.872		-1.44	0.108	0.0174	-0.444	-0.0947
-0.422	-0.45	-0.959	0.0594	0.708		-1.09	0.704	-0.0426	-0.514	-0.32
-0.442	-1.28	-1.38	0.531	0.832		-1.04	0.72	0.219	-0.576	-0.177
-0.464	-1.06	-1.07	-0.189	0.667		-1.38	-0.232	0.306	-0.284	-0.246
-0.655	-1.69	-0.889	0.558	0.619		-1.52	0.179	0.353	-0.401	0.019
-0.553	0.275	0.0564	0.429	0.545		-1.56	-1.31	0.471	-0.0325	-0.0495
-0.79	-0.704	-1.47	0.397	0.548		-1.88	0.219	0.559	0.131	0.192
-0.738	-0.455	-1.91	0.854	0.332		-1.34	-0.146	0.248	0.265	-0.00836
-0.355	-0.283	0.299	1.25	0.27		-1.25	-0.185	0.723	0.176	-0.299
-0.0568	-0.447	-0.492	1.91	0.0682		-1.58	-0.588	0.336	0.257	-0.335
-0.389	-0.739	-0.989	2.38	0.11		-1.19	-0.154	0.421	0.115	-0.126
-0.631	-0.358	0.456	1.82	0.292		-1.55	0.188	0.347	0.165	-0.543
-0.0801	-0.499	0.0158	1.49	0.449		-1.77	0.348	0.538	0.198	-0.118
-0.3	-0.275	-0.000478	0.934	0.393		-1.67	-0.163	0.411	-0.161	-0.556
-0.506	-0.199	0.0172	0.38	0.471		-1.72	-0.0947	0.231	-0.135	-0.534
0.416	-0.397	-0.522	0.502	0.817		-1.38	-0.711	-0.23	-0.356	-0.656
0.379	0.33	-1.27	0.0396	0.631		-1.39	0.889	-0.471	-0.264	-0.368
0.274	0.399	-0.555	0.301	0.656		-1.58	-0.183	-0.532	0.326	-0.809
-0.0379	-0.458	0.11	0.234	0.713		-1.17	-0.12	-0.4	0.211	-0.651
0.132	0.327	-0.377	-0.0632	0.74		-1.86	-0.555	-0.486	-0.149	-0.429
0.14	0.666	-0.731	-0.211	0.776		-2.21	-0.541	-0.161	0.412	-0.655
-0.319	0.88	-1.53	-0.0488	0.415		-2.35	0.947	0.0425	0.351	0.189
0.053	0.585	-0.735	-0.161	0.408		-1.82	-0.523	-0.0121	-0.0832	-0.0563
0.737	0.107	0.218	0.309	0.264		-1.54	0.511	-0.534	-0.105	0.754
0.765	-0.132	-0.297	0.138	0.23		-1.38	1.18	0.0224	-0.0277	0.47
0.961	-0.755	0.511	0.515	0.305		-1.58	0.154	-0.359	-0.235	0.371
1.14	-0.74	-0.875	0.624	0.383		-1.51	-0.176	-0.389	-0.097	0.658
0.541	0.0156	-0.84	0.0919	0.528		-1.27	-0.0932	-0.269	-0.105	0.102
0.861	0.093	-0.929	0.28	0.666		-0.477	-0.278	-0.424	-0.0599	0.145
1.35	-0.624	-0.776	-0.205	1		-0.651	-0.168	-0.288	0.258	0.301
0.834	-0.857	-0.861	-0.259	1.09		0.672	-0.307	-0.21	0.037	0.223
1.05	-0.237	-0.796	-0.139	1.04		0.307	0.048	-0.183	0.252	0.328
0.92	-0.0554	-0.852	0.335	1.11		0.912	-0.605	-0.0947	0.0992	-0.0459
1.25	-0.761	-1.02	0.0896	0.913		0.695	-1.14	-0.148	0.0279	0.395
1.39	-0.0081	-0.411	0.309	0.798		0.192	-1.37	0.198	0.238	0.109
1.2	0.108	-0.128	0.62	0.746		-9.55e-05	-0.505	0.142	0.0629	0.293
1.32	-0.344	-1.93e-05	0.306	0.639		-0.0433	0.0669	0.186	0.37	0.0336
0.913	0.34	-0.487	0.89	0.694		0.298	1.04	-0.114	0.17	0.452
0.418	0.308	-0.00834	0.852	0.662		0.252	-0.688	0.287	0.108	0.262
0.615	0.755	-0.0915	0.911	0.53		0.591	1.33	0.192	0.176	0.621
-0.0377	0.284	-1.26	0.574	0.499		0.103	0.0876	0.325	0.281	1.79
0.28	0.629	-0.906	0.182	0.549		-0.187	0.0402	-0.00298	-0.0756	2.43
0.238	-0.161	0.508	0.401	0.473		0.123	-0.544	-0.169	0.106	1.15
-0.508	0.0326	-0.303	0.395	0.478		-0.136	-0.127	0.363	0.238	1
-0.101	0.101	-0.835	0.626	0.303		-0.517	0.354	0.29	0.235	1.76
0.451	0.622	-0.795	0.399	0.34		-0.328	0.501	-0.0326	0.0238	1.53
0.28	-0.208	-1.06	0.679	0.654		-1.03	0.0561	0.643	0.0168	1.01
0.385	-0.619	-1.34	0.154	1.04		-0.618	-0.979	0.469	0.0709	0.834
0.263	0.366	-2.06	0.292	1.21		0.337	-0.274	0.427	1.05	0.978
0.104	0.452	0.192	-0.513	1.13		0.838	-0.38	0.574	1.05	0.965
-0.209	0.152	-1.55	-0.271	1.19		0.494	0.655	0.563	0.28	0.712
0.202	1.34	-1.46	-0.36	0.929		0.635	-0.832	0.679	0.279	0.742
-0.0352	0.995	-1.11	0.312	0.852		1.1	-0.229	0.358	0.448	0.708
0.0767	0.91	-0.754	-0.737	0.844		1.35	-0.0231	0.222	0.306	0.948
0.0102	0.495	-1.86	-0.846	0.645		1.14	-0.344	-0.0752	0.351	0.821
-0.328	0.506	-1.16	-0.455	0.61		1.01	0.342	-0.17	0.00765	0.802
-0.617	-0.202	-0.216	-0.321	0.538		1.1	-0.427	-0.333	0.399	1.03
-0.321	-0.57	-1.89	-0.687	0.364		0.364	-0.683	-0.0573	0.222	0.879
-0.489	-1.02	-0.129	-0.164	0.335		0.437	-0.839	-0.013	0.024	1.25
-0.0951	-0.504	-1.15	-0.589	0.279		0.029	0.489	-0.032	0.134	0.953
0.025	0.117	-0.504	-0.928	0.286		0.00378	-0.0568	0.324	0.277	1.22
-0.0784	-0.0691	-1.35	-0.943	0.124		0.277	-0.204	-0.0339	0.631	1.21
-0.035	-1.18	-0.965	-0.561	-0.08		0.0433	-0.906	0.227	0.724	1.74
0.438	-1.42	0.218	-0.156	-0.11		-0.173	-0.541	0.538	0.513	1.42
0.18	-1.64	-0.725	-0.365	-0.207		-0.234	0.265	0.337	0.368	1.36
0.298	-1.24	-0.107	-0.359	-0.212		-0.461	-0.781	0.09	0.247	1.09
-0.0196	-0.909	1.49	-0.252	-0.161		-0.683	-1.53	0.404	0.556	1.06
0.0231	-0.805	-0.254	-0.343	-0.0378		-0.186	-1.46	0.422	0.247	1.19
-0.335	-0.764	-0.446	-0.00373	-0.0719		-0.409	-0.174	-0.0847	0.348	0.978
-0.63	-0.787	-1.23	-0.222	-0.387		-0.303	-1.36	-0.426	0.498	0.754
-0.423	-1.4	-0.046	-0.00477	-0.45		-0.573	-0.272	0.232	0.353	0.959
-0.592	-1.02	-0.504	-0.236	-0.379		-0.307	-0.405	-0.436	0.422	1.1
-0.54	-0.996	-1.07	-0.124	-0.311		-0.618	-0.411	-0.511	0.477	1.68
-0.419	-1.26	0.0593	0.388	-0.318		-0.587	-0.0976	-0.196	0.666	1.26
0.0247	-0.986	0.524	0.415	-0.314		-0.372	-1.06	-0.454	0.502	0.962
-0.494	-1.03	0.643	0.266	-0.239		-1.31	-0.789	-0.0247	0.429	0.629
-0.578	-0.634	0.712	0.278	-0.101		-0.756	-1.46	0.239	0.505	0.528
-0.862	0.21	0.162	0.257	-0.219		-1.28	-0.424	0.44	0.187	0.604
-0.435	0.278	-0.32	1.17	-0.173		-1.5	-0.231	0.000325	0.498	0.636
0.139	0.38	-1.1	1.38	-0.279		-1.36	1.85	-0.0227	0.373	0.751
0.199	0.712	0.567	1.68	-0.284		-1.12	-0.295	-0.0634	0.381	0.568
0.187	1.69	-0.392	1.18	-0.222		-0.875	-1.42	0.44	0.614	0.334
0.277	1.05	-1.02	1.04	-0.293		-0.986	-1.5	0.591	0.653	0.372
0.142	1.67	-1.2	0.409	-0.307		-1.18	-0.0828	0.415	0.718	0.69
0.0448	0.976	0.544	1.01	-0.296		-0.264	-0.37	0.359	0.291	0.498
0.496	0.26	1.12	1.24	-0.304		-0.822	-0.822	0.689	0.33	0.653
0.312	0.604	0.381	1.33	-0.158		-0.399	0.00419	0.391	0.432	0.548
0.0238	0.889	0.813	1.32	-0.386		-0.635	-0.731	0.277	0.561	0.534
0.107	0.654	0.107	0.621	-0.323		-0.699	-0.673	0.386	0.284	0.733
-0.0234	1.09	0.231	0.00777	-0.263		-1.01	-0.655	-0.118	0.113	1.23
0.0966	0.808	2.25	-0.0514	-0.0655		-0.922	-0.719	-0.104	0.258	1.03
0.137	1.05	2.2	-0.322	-0.41		-0.308	-0.448	0.192	0.462	1.22
-0.0573	0.615	0.853	0.405	-0.51		-0.525	-0.317	-0.0354	0.0986	1.31
0.354	0.228	1.54	-0.36	-0.553		0.176	0.117	-0.0617	0.31	1.18
-0.223	0.154	1.44	0.229	-0.39		0.00925	-0.396	-0.153	0.421	1.12
-0.19	0.217	-0.225	-0.389	-0.628		-0.501	0.0335	-0.0696	-0.179	1.47
-0.0311	0.0616	2.57	0.235	-0.715		0.0717	-1.18	-0.0984	0.0538	1.42
-0.17	0.219	0.508	-0.0582	-0.701		1	-1.34	0.559	0.0988	0.875
-0.0889	0.399	0.751	-0.803	-0.726		0.99	-0.804	0.31	0.203	0.56
-0.0739	0.349	0.706	-0.43	-0.481		0.608	-0.278	-0.115	-0.232	0.996
0.0525	-0.0061	-0.52	0.162	-0.656		0.368	0.156	0.337	-0.246	0.715
0.106	-0.989	-0.705	-0.604	-0.547		0.798	-0.292	0.261	-0.448	0.651
-0.307	-0.512	-0.00187	-0.572	-0.724		0.215	0.305	0.429	0.126	0.606
-0.27	-0.377	-1.12	-0.338	-0.71		0.332	-0.147	0.635	-0.319	0.261
0.11	0.598	0.531	-0.353	-0.494		0.26	-1.09	0.566	-0.434	0.662
0.00974	0.538	-0.945	-0.653	-0.175		0.00603	-1.82	0.243	-0.444	0.602
0.314	1.26	-1.42	-0.436	-0.487		-0.00822	0.608	0.544	-0.12	0.346
-0.00116	0.577	-0.715	0.0731	-0.481		0.474	-1.1	0.221	-0.268	0.474
-0.102	-0.369	-0.474	-0.0705	-0.662		0.0904	-0.596	0.164	-0.258	1.55
-0.00669	1.2	-1.14	0.471	-0.633		-0.0296	-1.51	0.000898	-0.673	1.65
-0.139	1.51	-0.114	0.58	-0.506		0.228	-1.14	0.19	-0.739	1.13
-0.19	1.94	-0.667	0.504	-0.588		0.404	-0.47	0.0982	-0.793	0.482
-0.137	-0.013	-0.459	0.47	-0.531		-0.209	-0.528	0.139	-0.661	0.821
-0.271	0.675	0.813	-0.155	-0.564		-0.0725	-0.436	0.149	-0.419	0.878
-0.531	0.449	-0.427	0.012	-0.56		-0.445	-0.643	0.207	-0.322	0.0205
-0.46	0.658	1.34	-0.127	-0.657		-0.756	0.451	0.0495	-0.319	-0.0895
-0.29	0.2	2.11	-0.446	-0.519		-0.62	-1.58	0.373	-0.219	0.311
-0.416	0.499	0.777	-0.781	-0.0464		-0.265	-0.895	0.504	-0.268	0.264
-0.695	0.549	0.552	-0.0266	0.065		-0.734	-0.652	0.627	-0.347	-0.297
-0.875	-0.375	0.343	-0.372	0.615		-0.261	-0.311	0.436	-0.341	-0.29
-0.509	-0.114	0.83	-0.689	1.1		-0.491	-0.213	0.773	0.00639	0.14
0.076	-1.01	0.871	-0.704	1.19		-0.472	-0.551	0.317	-0.315	-0.16
0.2	-0.439	1.09	-0.506	0.969		-0.734	-0.675	0.523	0.2	0.231
-0.341	-0.082	-0.0557	-0.519	0.914		-0.525	-0.763	0.374	-0.145	0.562
-0.231	0.274	0.243	-0.431	0.949		0.182	-1.24	0.372	-0.345	0.0506
-0.528	-0.612	0.579	-1.01	1.01		0.107	-0.995	0.272	0.0951	-0.0711
0.0626	-0.96	0.816	-0.0206	0.911		0.213	0.00412	0.452	0.0862	-0.14
-0.101	-1.14	0.176	-0.0598	0.974		-0.394	-0.651	0.501	-0.122	-0.0925
0.234	-0.485	0.913	0.0164	0.794		0.0556	0.503	0.441	-0.143	-0.359
0.546	0.321	-0.0324	-0.00299	0.929		-0.497	-0.297	0.976	0.215	0.158
0.249	1.15	0.489	-0.587	0.945		-0.57	0.0982	1.34	0.178	0.443
0.249	0.835	-0.264	0.304	0.786		-0.443	0.487	1.33	0.216	1.25
0.507	0.334	-0.33	0.138	0.531		-0.411	0.276	1.52	0.198	1.18
0.495	1.35	0.256	-0.543	0.297		-1.04	0.397	1.09	-0.0131	1.15
0.522	0.507	-0.421	-0.693	0.118		-0.982	0.132	1.13	0.0516	1.2
0.312	-0.052	-0.572	-0.56	0.122		-1.14	-1.44	1.15	-0.126	1.09
0.775	-0.17	0.0915	-1.38	-0.00182		-0.36	0.283	1.56	0.0971	0.919
0.812	-0.146	0.23	-1.34	0.13		-0.469	-0.229	1.48	-0.122	0.953
1.07	-1.23	0.628	-1.05	0.0722		-0.503	-0.401	0.951	-0.124	1.26
0.587	-0.347	0.127	-1.02	-0.102		-0.686	0.312	1.09	0.0216	0.831
0.546	-0.622	0.745	-0.678	-0.0995		-0.796	0.915	0.689	0.0477	0.822
0.692	-0.385	0.495	-0.501	-0.212		-1.29	-0.263	1.11	-0.331	0.571
0.515	-0.092	0.35	-0.578	-0.0961		-0.959	-0.748	0.88	-0.311	0.338
0.249	0.818	-0.181	-0.869	-0.322		-1.25	-0.863	0.837	-0.205	0.482
0.516	0.846	0.315	-0.794	-0.07		-1.37	0.0928	0.818	-0.212	1.13
0.742	1.14	0.825	-0.692	0.0714		-1.47	-0.581	0.964	-0.274	1.32
0.311	0.00741	1.07	-0.618	0.0368		-1.36	-0.637	0.628	-0.564	1.06
0.239	-0.231	1.14	-0.347	-0.0403		-1.55	-0.255	0.831	-0.612	0.219
0.479	-0.236	0.778	-0.646	0.0512		-1.24	0.339	0.259	-0.315	0.578
0.134	0.0393	1.57	-0.842	-0.262		-1.42	-0.316	0.832	-0.223	0.647
0.00241	-0.0962	-0.328	-0.692	-0.189		-1.81	-0.417	1.08	0.106	1.05
0.722	-0.431	-0.601	-0.966	-0.235		-1.76	-0.757	0.625	0.38	0.311
0.706	0.159	0.853	-0.563	-0.365		-1.83	-0.57	0.412	0.434	0.763
0.281	1.37	0.937	-0.552	-0.316		-1.9	0.729	0.497	0.19	0.951
0.301	0.573	1.91	-0.583	-0.257		-1.79	0.318	0.496	0.222	0.521
0.429	0.594	0.773	-0.521	-0.358		-2.22	0.315	0.687	0.535	0.448
0.0876	0.458	-0.428	-0.328	-0.37		-2.03	-0.902	0.5	-0.181	0.731
-0.0848	1.28	-0.0335	-0.577	-0.442		-2.37	-1.67	0.411	-0.0582	0.66
0.076	0.992	0.332	-0.585	-0.19		-2.08	-0.154	0.531	0.347	0.964
-0.0307	0.897	0.868	0.00917	-0.121		-2.32	-0.163	0.92	0.0264	0.266
-0.389	1.37	2.4	0.0595	-0.223		-1.76	-0.243	0.697	-0.322	-0.176
-0.422	1.19	1.38	-0.194	-0.161		-2.2	0.539	1.05	0.0956	-0.688
-0.233	1.88	0.946	0.0833	-0.139		-1.96	-0.174	1.16	0.261	-0.0848
-0.686	1.35	1.4	0.0329	0.461		-1.52	0.361	1.34	0.438	0.297
-0.327	2.45	0.19	-0.346	0.536		-1.87	0.23	1.26	0.421	-0.0628
-0.407	2.9	0.0884	-0.135	0.313		-1.27	-0.0244	1.25	0.281	-0.044
0.138	2.68	-0.438	-0.0865	0.379		-2.15	-0.363	1.19	0.0708	-0.927
-0.147	2.29	0.88	-0.232	0.309		-1.95	0.712	1.05	0.0472	-0.254
-0.25	1.07	0.788	-0.637	0.255		-2.14	0.0508	1.11	0.327	-0.287
-0.114	1.27	-0.296	-0.655	0.292		-2.28	-0.434	1.38	0.16	-0.895
-0.484	1.72	0.0542	-0.06	0.267		-2.09	-0.944	0.934	0.219	-0.76
-0.571	1.15	0.887	-0.532	0.376		-2.2	-0.533	0.637	0.596	-0.465
-0.142	1.46	0.212	-1.07	0.113		-2.28	-0.826	1.36	0.309	-0.407
-0.137	0.353	1.26	-1.34	0.0722		-2.38	-0.752	1.24	0.431	-0.0708
-0.477	-0.0456	1.1	-1.25	0.134		-2.77	-0.335	1.34	0.292	-0.179
-0.141	0.165	-0.197	-0.609	0.0276		-2.54	0.914	1.33	0.15	-0.482
-0.131	0.25	-0.324	-0.915	-0.0568		-2.79	0.297	1.12	0.308	-0.0911
-0.295	-0.0204	-0.55	-0.798	-0.0395		-3.16	-0.344	1.42	0.449	-0.373
-0.319	0.74	-0.297	0.193	-0.0993		-3.7	-1.05	1.18	0.275	-0.05
-0.585	-0.776	-1.02	0.188	-0.256		-3.36	-0.277	1	0.539	-0.324
-0.764	-0.26	1.09	0.0727	-0.417		-2.71	1.55	0.77	0.479	-0.237
-0.91	-0.0458	1.03	0.1	-0.34		-2.73	0.215	0.0736	0.42	-0.702
-0.924	0.34	0.0574	-0.51	-0.0198		-3	0.882	0.693	0.327	-0.225
-0.76	0.333	-0.964	-0.599	0.309		-2.75	1.25	0.608	0.348	-0.0271
-0.497	0.37	-0.656	-0.961	0.322		-2.44	0.396	0.862	-0.015	-0.26
-0.543	1.64	-0.412	-0.868	0.4		-2.48	0.436	0.774	-0.0139	-0.359
-1.03	2.25	-0.318	-0.573	0.453		-2.95	-0.473	0.836	-0.0669	-0.557
-1.01	2.15	0.591	-0.493	0.313		-2.78	0.825	0.551	0.577	-0.124
-0.891	3.19	-0.59	-0.923	0.285		-2.81	0.653	0.788	0.149	-0.133
-0.401	3.98	-1.01	-0.382	0.0872		-2.59	0.242	0.724	0.543	-0.672
-0.604	3.12	-0.42	-0.498	-0.0204		-2.37	0.989	0.145	0.446	-1.37
-0.731	2	-0.85	-0.229	-0.0654		-2.33	1.73	0.383	-0.00203	-0.5
-0.838	0.751	-1.62	-0.601	-0.0835		-1.41	0.701	0.336	0.245	-0.478
-1.02	0.559	-0.0443	-0.799	0.127		-0.973	1.19	0.241	0.255	-0.487
-1.27	0.841	-1.01	-1.2	0.0603		-0.466	1.24	0.2	-0.167	-0.49
-1.22	0.9	-0.624	-0.689	0.291		-1.13	0.023	0.531	0.281	-0.577
-0.917	0.902	-0.671	-0.597	0.219		-1.29	0.303	0.541	0.253	-0.651
-1.07	0.596	-0.186	-0.0129	0.385		-0.823	0.559	0.59	0.303	-0.233
-1.08	-0.195	-1.16	-0.221	0.313		0.0917	0.0752	0.00837	0.489	-0.382
-1.14	0.235	-0.368	-0.0933	0.273		-0.282	0.068	0.178	0.444	0.314
-1.17	0.387	-0.139	-0.387	0.262		0.152	0.732	0.197	0.143	0.12
-1.22	-0.319	-1.41	-0.46	0.207		-0.259	0.2	-0.275	0.275	0.0599
-1.31	0.672	1.12	-0.17	0.155		0.372	-0.126	-0.436	0.337	0.151
-1.77	-0.217	0.499	-0.687	0.0485		-0.239	0.0889	-0.58	0.214	-0.294
-1.73	0.0713	-0.353	-0.124	-0.0042		-0.143	0.248	-0.18	0.129	-0.0545
-1.63	-0.182	0.879	-0.625	-0.0595		0.0168	-0.816	-0.00851	0.252	-0.565
-1.76	-0.432	0.659	-0.407	-0.151		-0.249	-0.603	0.108	0.0276	-0.0054
-1.26	-0.363	-0.0426	-0.681	-0.153		-0.0816	0.747	0.291	-0.272	-0.476
-1.09	-0.906	0.413	-0.64	-0.0376		-0.521	0.607	0.121	0.114	-0.224
-0.828	-1.08	0.848	-1	0.283		-0.299	0.819	0.108	0.484	-0.291
-0.994	-1.43	1.34	-0.695	0.211		0.427	-0.132	0.176	0.234	-0.382
-1.1	-0.447	0.307	-1.11	0.255		0.702	0.0512	0.556	0.0429	-0.176
-1.05	-0.00518	-0.97	-0.327	0.415		0.532	-0.0199	0.198	0.216	-0.165
-0.795	-0.112	-0.551	-1.15	0.395		0.371	0.185	0.64	0.0941	-0.143
-0.445	0.357	-0.0412	-0.627	0.453		-0.00799	0.154	0.34	0.09	-0.513
-0.34	1.4	-0.737	-1.17	0.471		0.21	0.553	0.378	0.345	-0.645
-0.6	2.46	-0.00397	-0.586	0.536		-0.0558	0.132	0.231	0.285	-0.422
-0.596	1.61	0.93	-1.52	0.589		-0.191	-0.793	-0.0307	0.0562	-0.613
-0.695	1.33	0.304	-0.918	0.487		-0.0126	-0.0572	-0.139	0.564	-0.387
-0.473	0.951	-0.131	-1.27	0.426		-0.473	-0.258	-0.257	0.771	-0.169
-0.391	0.494	0.177	-1.23	0.523		0.171	-0.789	0.345	0.709	0.412
-0.338	0.916	0.127	-1.2	0.404		0.682	0.36	0.826	0.595	0.166
-0.567	1.85	0.625	-0.904	0.408		1.34	-0.237	0.269	1.07	0.14
-0.612	1.38	1.1	-0.404	0.207		0.805	-0.569	0.649	0.903	-0.184
-0.828	1.06	0.264	-0.396	-0.0656		0.771	0.0567	0.893	0.85	-0.53
-0.925	1.55	0.571	-0.342	-0.0307		0.372	-0.359	0.797	0.88	-0.6
-0.865	1.64	0.248	-0.868	-0.214		0.615	-0.373	0.747	1.11	-0.0607
-0.566	1.14	0.282	-1.21	-0.158		0.278	-0.681	0.811	0.912	-0.311
-1.16	1.88	-0.968	-0.895	-0.225		0.319	-0.26	0.474	0.837	0.187
-0.917	2	0.309	-1.12	-0.212		0.206	0.283	0.636	0.965	0.236
-0.712	1.84	-0.196	-1.19	-0.439		0.144	0.984	0.604	1.22	0.438
-0.832	1.55	0.541	-1.41	-0.415		0.12	-0.843	0.366	1.01	0.888
-0.961	1.64	-0.177	-1.27	-0.281		-0.133	1.01	0.245	0.773	0.24
-1.03	1.58	1.56	-1.31	-0.316		-0.034	0.518	0.231	0.816	0.484
-1.33	1.4	1.19	-1.11	-0.243		-0.477	-0.564	0.257	0.511	0.103
-1.62	0.553	0.133	-0.933	-0.334		-0.281	-0.619	0.0142	0.244	0.644
-1.54	0.574	0.861	-1.09	-0.215		-0.593	-0.0457	0.77	0.429	-0.0917
-1.83	-0.437	0.747	-1.03	-0.199		-0.0444	-0.423	0.972	0.0967	0.204
-1.43	-0.297	0.863	-1.34	0.0549		-0.674	-0.028	0.583	0.358	-0.12
-0.899	-0.979	0.698	-1.44	0.577		-0.982	0.188	0.492	0.37	-0.112
-1.02	-0.29	0.446	-1.04	0.7		-1.24	-0.297	0.546	-0.0121	-0.0743
-1.38	-0.222	0.302	-1.59	0.639		-1.37	-0.681	0.863	0.221	0.379
-1.43	-0.171	0.581	-1.39	0.585		-1.48	-0.991	0.535	0.158	0.303
-1.3	-0.292	0.773	-0.907	0.414		-1.33	-0.49	0.403	0.531	0.381
-1.02	-0.876	0.405	-0.476	0.39		-1.45	0.465	0.867	0.782	0.303
-0.513	-0.875	0.573	-1.22	0.187		-1.68	0.279	1.17	0.643	0.572
-0.863	0.0265	0.913	-1.11	0.211		-1.55	-0.743	1.36	0.425	0.0534
-0.674	-0.12	0.902	-1.26	-0.00367		-1.37	0.327	1.44	0.547	0.193
-0.396	-0.445	-0.493	-1.03	-0.0552		-1.28	0.298	1.39	0.863	0.0599
-0.636	-0.427	1.06	-0.897	-0.276		-1.26	0.295	1.48	0.729	-0.308
-0.764	-0.85	0.874	-0.697	-0.424		-1.46	0.174	1.35	0.731	0.827
-0.722	-0.204	1.7	-0.631	-0.445		-0.998	0.0836	1.17	0.846	1
-0.749	-1.17	1.11	-0.752	-0.525		-1.12	1.2	0.333	0.63	1.59
-1	-0.484	1.86	-1.41	-0.511		-1.36	1.03	-0.425	0.519	1.23
-0.659	-0.516	-0.424	-1.19	-0.402		-1.7	0.0302	-0.0361	0.371	0.831
-0.639	-0.735	-0.227	-2.07	-0.489		-1.6	-0.21	0.739	0.226	1.03
-0.956	-0.252	-0.996	-1.72	-0.634		-1.81	-0.253	0.932	0.113	0.751
-0.805	-0.715	1.61	-1.39	-0.542		-1.14	-0.136	0.777	0.425	0.949
-0.688	-0.368	2.31	-1.15	-0.321		-1.05	0.721	0.6	0.396	0.495
-0.533	-0.842	0.548	-0.765	-0.323		-1.07	0.245	0.724	0.189	0.668
-0.982	-0.602	0.632	-0.935	-0.406		-1.21	0.577	0.772	0.662	0.364
-0.914	-1.19	1.33	-1.18	-0.306		-1.29	-0.226	0.517	0.631	-0.0133
-0.903	-0.666	1.7	-0.775	-0.211		-0.996	0.68	0.382	0.564	0.818
-0.701	-0.771	1.56	-0.826	-0.46		-0.685	0.4	0.27	0.213	0.448
-0.442	-0.0826	1.54	-0.766	-0.505		-0.712	0.207	0.488	0.374	1.05
-0.784	1.21	1.37	-1.13	-0.601		-0.655	-0.694	0.28	0.287	0.511
-0.979	1.44	-0.524	-0.962	-0.45		-0.317	-0.122	0.162	0.0672	1.09
-0.653	2.48	-0.063	-0.449	-0.614		-0.205	0.636	0.343	-0.0559	0.896
-0.761	2.07	-1.27	-0.603	-0.495		-0.625	0.318	0.747	0.0118	0.827
-0.542	2.23	-1.03	-0.654	-0.517		-0.821	1.36	0.712	0.383	0.688
-0.58	1.87	-0.789	-0.886	-0.721		-1.33	1.01	0.691	0.435	0.198
-0.612	1.18	0.0785	-1.16	-0.708		-1	0.161	0.538	0.985	0.944
-0.505	0.639	0.863	-0.332	-0.777		-0.311	0.519	-0.201	0.651	0.561
-0.642	-0.246	-0.53	-1.14	-0.737		-0.562	-0.22	-0.17	0.899	0.553
-0.258	0.59	0.113	-0.86	-0.777		-0.348	-0.166	-0.435	0.842	0.199
-0.821	-0.0215	-0.0558	-0.908	-0.654		-0.607	-0.409	-0.0974	0.898	0.108
-0.522	-0.784	-0.683	-0.869	-0.65		-0.991	-0.0885	0.0615	1	0.92
-0.682	-1.01	-0.566	-0.833	-0.752		-0.886	-0.469	0.139	0.82	0.739
-1.17	-0.608	0.718	-1.28	-0.838		-0.811	-1.52	-0.385	1.06	0.569
-0.798	-0.22	1.04	-1.22	-0.916		-1.06	0.0419	0.092	0.728	0.747
-0.67	0.425	0.666	-1.19	-0.869		-0.549	-0.824	0.499	0.775	0.599
-0.818	0.231	1.27	-1.37	-0.83		-0.483	-0.863	0.724	1.02	0.416
-0.62	-0.972	0.308	-1.32	-0.852		-0.736	-1.51	0.498	1.11	0.92
-0.782	-0.52	0.0714	-1.51	-0.916		-1.3	-1.66	0.392	1.1	0.46
-0.916	-0.263	1.15	-1.02	-1.06		-1.19	-0.656	0.364	1.04	-0.133
-1.28	-0.158	0.744	-0.285	-1.01		-1	-0.919	0.593	1.23	-0.348
-1.45	1.59	1.15	-0.703	-0.753		-0.712	-0.0749	0.481	1.3	-0.0896
-1.21	3.25	-0.0232	-0.882	-0.703		-1.3	-0.22	0.45	1.28	0.248
-1.3	2.63	-0.24	-0.976	-0.764		-1.56	0.45	0.555	1.13	0.896
-1.39	2.5	1.27	-0.383	-0.851		-1.71	0.433	0.638	1.1	0.865
-1.3	1.4	-0.393	-0.656	-0.566		-1.21	-1.6	0.361	0.996	0.576
-1.18	2.25	-0.257	-0.632	-0.717		-1.57	-0.418	0.204	1.11	0.721
-1.71	2.67	0.479	-0.24	-0.64		-1.64	-0.54	0.238	1.12	0.427
-1.91	2.56	0.753	-0.547	-0.63		-1.11	0.0654	0.246	0.809	1.27
-1.62	3.26	0.936	-0.277	-0.658		-0.902	1.26	0.236	0.933	1.21
-1.9	2.43	-0.114	-0.938	-1.03		-0.87	-0.00336	0.268	1.09	1.64
-2.14	1.87	-0.0828	-0.948	-1.1		-0.641	0.818	0.363	0.95	0.941
-1.77	1.81	-0.357	-0.835	-1.12		-0.744	-0.408	0.199	1.1	1.42
-1.62	1.7	0.357	-0.768	-1.17		-1.11	-0.649	0.137	1.38	1.22
-1.28	1.86	-0.876	-0.297	-0.949		-0.957	-1.02	0.107	0.628	1.3
-1.93	2.3	0.705	-1.39	-1.2		-0.895	-0.89	-0.0752	0.662	1.12
-2.14	1.79	0.981	-1.05	-1.22		-1.13	-0.354	-0.0518	0.749	1.12
-2.37	1.32	-0.216	-1.13	-1.15		-1.26	-0.753	0.208	0.862	0.769
-2.28	1.3	0.878	-1.2	-1.02		-0.87	-0.461	0.147	0.785	0.194
-1.8	0.932	0.194	-1.03	-1.18		-1.1	-0.75	0.458	0.802	0.275
-1.19	1.38	0.266	-1.56	-1.27		-1.2	-0.305	0.279	0.544	0.0011
-1.53	1.18	0.143	-0.734	-1.17		-1.09	-0.745	0.334	0.879	0.163
-1.4	0.299	0.483	-1.27	-1.33		-1.23	-0.789	0.0243	0.641	-0.598
-1.73	0.932	-0.0141	-1.37	-1.15		-1.6	-0.815	-0.408	0.98	-0.333
-1.64	1.54	0.619	-1.45	-0.557		-1.33	-0.0921	-0.443	0.263	0.237
-1.94	1.5	0.0963	-1.8	-0.6		-1.45	-0.567	0.759	0.628	-0.0232
-1.19	0.709	1.35	-1.6	-0.434		-1.37	-0.574	0.681	0.482	-0.114
-1.05	0.491	0.468	-1.15	-0.259		-1.12	-0.345	0.811	0.266	-0.19
-1.07	0.893	0.562	-1.01	-0.306		-1.67	-0.505	0.644	0.449	0.196
-1.52	1.04	-0.679	-0.517	-0.404		-1.33	-0.635	1.06	0.698	-0.178
-1.57	0.942	0.0084	-0.81	-0.223		-1.36	0.147	1.25	0.305	0.233
-1.38	-0.122	0.593	-0.844	-0.251		-1.21	-0.738	1.47	0.375	0.689
-1.87	0.325	-1.06	-1.03	-0.471		-1.55	0.581	2.08	0.321	0.741
-1.64	-0.0546	-1.18	-1.28	-0.626		-1.34	-0.741	2.56	0.368	0.66
-1.82	0.322	-1.94	-1.18	-0.749		-1.84	-1.81	2.84	0.6	0.674
-1.78	0.278	0.675	-0.971	-0.758		-1.67	-0.964	2.6	0.843	0.682
-1.1	0.238	0.854	-0.959	-0.521		-1.07	-0.106	2.7	0.83	0.704
-1.11	0.757	-0.0473	-1.16	-0.802		-1.17	-1.26	2.78	0.294	1.66
-1.08	0.666	0.126	-0.966	-0.822		-1.26	-0.606	2.85	0.415	0.998
-1.18	0.533	-0.561	-1.75	-0.747		-0.636	0.554	2.87	0.419	0.605
-1.45	-0.316	0.863	-1.2	-0.587		-0.428	0.284	2.53	0.439	0.903
-1.5	0.455	1.43	-1.22	-0.55		0.0247	0.389	2.08	0.721	0.667
-1.22	0.248	-0.2	-1.62	-0.457		0.471	-0.534	2.22	0.748	0.499
-1.6	0.0315	-0.557	-1.35	-0.589		0.523	0.589	1.77	0.639	0.554
-1.38	0.197	0.5	-1.21	-0.359		0.321	-0.42	1.76	1.1	0.6
-0.961	0.0687	0.989	-1.54	-0.475		0.207	-0.278	2.11	0.822	0.761
-0.85	-0.187	0.797	-2.29	-0.442		0.249	-0.711	1.6	0.859	0.712
-0.772	-0.088	-0.833	-2.1	-0.679		0.122	-0.703	1.73	0.928	0.654
-1.08	0.425	0.394	-2.14	-0.622		-0.316	-0.408	1.06	0.993	0.679
-1.07	0.638	0.937	-2.2	-0.741		-0.222	0.0585	0.881	0.784	0.488
-1.35	-0.339	0.893	-1.72	-0.676		0.00331	-0.639	0.619	0.892	0.832
-1.17	0.158	0.358	-1.46	-0.758		-0.266	-1.8	0.624	0.892	1.11
-1.19	1.57	0.624	-1.77	-0.926		-0.485	-0.374	0.372	0.84	0.822
-1.55	0.384	0.923	-1.84	-0.828		-0.382	-0.808	0.685	0.677	0.626
-1.58	0.469	0.724	-1.34	-0.709		-0.427	-0.786	0.823	0.793	0.616
-1.16	1.55	0.462	-1.65	-0.651		-0.647	0.255	0.8	0.662	0.661
-0.964	1.03	1.45	-1.81	-0.499		-0.465	-0.574	1.09	0.728	0.573
-1.37	0.709	1.84	-1.66	-0.533		-0.347	-1.61	1.18	0.766	0.883
-0.659	1.18	1.03	-1.28	-0.464		-0.853	-1.12	0.954	0.323	0.555
-0.936	1.01	-0.0796	-1.73	-0.396		-0.53	-1.5	0.666	0.309	-0.163
-0.971	0.412	0.348	-1.89	-0.584		-0.659	-1.1	1.05	0.667	-0.391
-0.994	0.905	-0.277	-1.19	-0.389		-1.14	-1.79	1.21	0.537	-0.326
-1.18	0.48	-0.134	-0.966	-0.543		-0.888	-0.991	1.11	0.7	-0.707
-1.16	-0.451	0.289	-0.675	-0.416		-0.582	-0.93	1.79	0.367	-0.0215
-1.29	0.455	-0.822	-1.53	-0.468		-0.993	-0.685	1.66	0.664	0.57
-1.06	0.347	-0.83	-0.962	-0.639		-1.12	-1.38	1.43	0.52	0.621
-1.37	0.515	-1.07	-0.754	-0.611		-1.19	0.224	1.57	0.409	0.387
-1.02	-0.00719	-0.414	-1.27	-0.519		-0.934	-0.0496	1.44	0.53	0.406
-1.47	-0.0342	-0.318	-0.947	-0.677		-0.701	-0.714	1.53	0.693	0.595
-1.29	0.144	0.328	-1.35	-0.715		-0.779	-0.632	1.32	0.758	0.0261
-1.32	0.302	-0.425	-1.13	-0.522		-0.87	-0.738	1.93	0.68	-0.322
-1.02	-0.0446	-1.24	-0.951	-0.489		-0.867	0.433	2.74	0.65	0.201
-0.521	0.588	-1.45	-0.964	-0.595		-0.404	-1.29	2.7	0.802	0.404
-0.515	0.168	-0.019	-1.04	-0.653		-0.937	-0.719	2.31	0.687	0.716
-0.47	0.061	0.86	-0.817	-0.674		-0.608	-0.309	2.02	0.855	0.388
-0.46	0.159	0.0394	-0.528	-0.708		-0.783	-0.343	2.67	0.675	-0.581
-0.535	0.327	-1.42	-0.53	-0.78		-1.02	-1.45	2.41	0.707	0.00314
-0.276	0.561	-0.882	-0.507	-1.02		-1.12	-1.84	2	0.407	-0.608
-0.125	0.924	-0.53	-0.893	-1.08		-1.11	-2.23	2.16	0.868	-0.682
0.309	1.04	0.308	-0.579	-0.977		-1.32	-2.06	2.01	0.506	-0.196
0.491	-0.278	-0.855	-0.266	-1.14		-1.38	-1	2.1	0.836	0.362
-0.108	-0.649	-0.602	-0.954	-0.965		-1.58	-1.54	1.72	0.334	-0.181
-0.166	-0.18	-0.459	-1.16	-0.824		-1.5	-2.02	1.71	0.61	0.0489
-0.337	-0.78	0.427	-1.04	-0.676		-0.985	-1.96	1.68	0.309	-0.0111
-0.298	-0.309	0.0174	-0.857	-0.764		-1.38	0.587	2.04	0.44	-0.17
-0.263	0.758	0.999	-1.38	-0.701		-1.24	-1.71	1.13	0.44	-0.0737
-0.566	0.0283	-1.05	-1.73	-0.686		-1.4	-1.23	1.59	0.562	0.00752
-0.203	-0.328	-0.8	-1.55	-0.757		-1.51	-0.955	1.57	0.527	-0.000266
-0.344	-0.435	-0.0261	-1.5	-0.632		-1.84	-1.46	1.56	0.626	-0.395
-0.582	0.0281	1.55	-1.75	-0.829		-1.74	-0.393	1.18	0.189	0.216
-0.864	0.052	-0.219	-1.58	-0.774		-1.6	-1.89	1.35	0.0534	0.247
-0.573	-0.204	0.341	-1.19	-0.699		-1.64	-2.23	1.8	-0.0668	0.104
-0.382	1.07	0.0738	-0.48	-0.726		-1.14	-1.03	2.03	0.378	0.584
-0.689	-0.0516	-0.963	-0.803	-0.864		-0.787	-1.17	1.27	0.394	0.494
-0.28	-0.214	-1.05	-1.57	-0.946		-0.788	-1.93	1.33	0.395	0.622
-0.727	0.164	-1.73	-1.09	-0.907		-0.944	-0.82	1.61	0.919	0.133
-0.493	0.0564	0.0428	-1.25	-1.01		-0.786	-1.59	2.04	0.87	0.312
-0.522	-0.431	0.417	-1.19	-0.931		-0.869	-1.21	1.9	0.499	0.577
-1.12	0.336	0.107	-1.34	-0.88		-0.237	-1.82	1.89	0.72	0.252
-0.863	0.898	1.1	-1.4	-0.782		-0.284	-1.43	1.79	0.632	0.677
-0.857	1.13	0.0712	-0.861	-0.843		-0.796	-1.08	1.5	0.351	0.144
-0.602	0.865	-0.105	-1.17	-0.633		-0.342	-1.74	0.996	0.454	0.302
-0.948	1.47	0.517	-1.22	-0.68		-0.113	-0.967	0.693	0.151	0.653
-0.832	0.964	0.574	-1.62	-0.78		0.3	-0.74	1.34	0.294	0.594
-0.618	1.13	-0.0746	-1.31	-0.867		-0.497	-1.27	2.15	0.106	0.522
-0.73	1.91	-0.839	-1.25	-0.884		0.357	-0.582	2.55	0.286	0.211
-0.819	0.884	-0.926	-1.21	-0.905		0.741	-0.788	2.46	0.103	0.513
-1.12	2.25	0.542	-1.26	-0.91		0.837	-0.627	2.7	0.365	0.296
-0.778	2.86	0.988	-1.19	-0.792		0.157	-1.06	2.48	-0.0519	0.299
-0.793	2.61	0.39	-0.904	-0.826		0.842	-0.149	2.5	-0.0808	0.5
-0.995	1.5	-0.377	-1.27	-0.889		0.429	-1.12	1.78	0.00938	0.67
-0.719	1.98	-1.1	-1.61	-0.99		-0.0512	-0.605	1.89	-0.106	1.15
-0.502	1.93	-0.304	-1.7	-1.07		-0.65	0.183	1.69	0.201	1.12
-0.458	1.41	-0.903	-1.55	-0.931		-0.406	-0.707	1.5	-0.12	0.762
-0.731	1.66	0.0992	-1.42	-1		0.116	-0.834	0.867	0.128	1.3
-0.513	1.83	-0.937	-1.09	-1.04		-0.276	-0.364	0.719	0.486	0.954
-0.637	1.34	-0.167	-1.63	-0.855		-0.51	1.02	1.09	0.113	1.28
-0.897	0.921	0.144	-1.82	-1.01		-0.683	-1.81	1.22	0.637	1.04
-0.526	1.34	0.221	-2.2	-0.96		-0.606	-0.302	1.03	0.0498	0.677
-0.366	1.83	1.05	-1.7	-0.62		-0.393	-1.2	0.999	0.268	1.32
-0.177	1.58	0.316	-1.74	-0.803		-0.535	-1.84	0.889	0.333	1.01
-0.0678	1.05	0.283	-1.26	-0.648		-0.432	-0.87	1.41	0.69	0.697
-0.0375	0.517	0.301	-1.78	-0.548		-0.762	-0.285	1.22	0.715	1.08
-0.419	0.654	-1.41	-1.35	-0.508		-0.552	-1.46	0.991	0.752	0.654
-0.468	0.354	1.28	-1.73	-0.291		-0.208	-0.924	1.08	0.962	0.734
-0.756	-0.396	0.681	-1.48	-0.362		-0.802	0.433	1.14	1.18	0.465
-0.362	0.0654	0.146	-1.63	-0.408		-0.385	0.0935	1.31	0.795	0.604
-0.563	0.359	1.23	-1.36	-0.596		-0.958	0.583	1.37	0.931	0.464
-0.629	0.632	0.759	-1.19	-0.686		-0.123	-1.06	1.32	0.792	0.489
-0.845	0.682	-0.224	-1.19	-0.836		-0.921	0.281	0.722	1.05	0.647
-0.814	0.298	-0.473	-0.783	-0.737		-0.925	-0.826	0.225	0.848	0.657
-1.44	-0.143	0.771	-1.21	-0.493		-1.41	0.00787	0.0722	1.12	-0.13
-0.977	-0.165	0.743	-0.765	-0.44		-0.894	-0.734	0.367	1.29	0.139
-0.889	0.169	-0.247	-1.64	-0.566		-0.872	-1.19	-0.219	0.865	-0.589
-1.15	0.0662	1.4	-0.999	-0.407		-0.815	-0.633	-0.369	1.33	-0.53
-1.54	-0.0882	1.87	-1.14	-0.7		-1.02	-1.34	0.256	1.12	-0.476
-0.83	-0.0524	1.39	-1.81	-0.879		-1.26	-1.2	0.303	1.14	-0.51
-0.732	-0.158	0.277	-2.68	-0.885		-1.35	-0.881	0.993	1.32	-1.1
-0.704	-0.653	0.492	-2.04	-0.884		-1.66	-1.4	1.04	1.21	-1.22
-1.05	-0.735	1.68	-1.77	-0.924		-1.16	-0.524	1.25	1.03	0.469
-0.945	0.273	1.68	-2.11	-0.997		-1.24	0.0886	1.16	1.23	0.962
-0.958	1.37	1.09	-1.83	-1.01		-0.806	-0.531	1.08	1.19	0.856
-0.924	0.643	-0.247	-1.84	-0.974		-0.566	-0.0796	0.906	0.73	0.992
-1.06	0.525	1.19	-1.26	-1		-0.941	-0.63	0.913	0.692	0.452
-1.62	0.909	2.05	-1.25	-1.15		-1.32	-1.07	0.96	0.477	0.0113
-1.03	0.625	2.57	-1.26	-1.1		-1.48	-1.6	0.64	0.407	0.342
-1.11	0.886	2.55	-1.78	-1.08		-1.09	-1.18	0.438	0.386	0.691
-1.35	1.4	2.28	-1.75	-1.31		-1.38	-0.785	0.875	0.349	0.319
-1.35	1.39	0.613	-1.37	-1.14		-1.14	0.254	0.828	0.46	0.544
-1.07	0.41	1.04	-1.71	-1.46		-1.12	-0.579	1.01	0.366	1.23
-0.777	0.726	0.402	-1.67	-0.971		-0.652	-0.257	1.08	0.765	0.568
-0.994	0.986	0.603	-1.79	-0.868		-0.42	0.348	1.15	1.18	0.604
-0.781	0.526	0.546	-1.79	-0.787		0.246	-0.32	0.88	1.14	0.515
-1.05	0.281	1.4	-1.14	-0.605		-0.0703	-1.11	0.816	1.31	0.553
-1.09	0.674	2	-1.04	-0.397		-0.662	-0.369	0.916	1.16	0.123
-0.559	1.3	2.89	-1.67	-0.544		-0.547	-0.115	1.03	1.43	0.726
-0.585	0.767	1.36	-1.03	-0.475		0.000933	0.059	0.534	1.05	1.13
-0.456	0.948	1.58	-0.51	-0.397		-0.212	-0.658	0.0404	1.14	0.681
-0.488	1.03	1.67	-0.707	-0.438		0.411	-1.14	-0.0677	1.2	0.548
-0.224	1.06	2.36	-1.36	-0.186		0.532	-0.107	0.38	0.922	1.08
-0.493	0.471	3.02	-1.34	-0.324		1.06	-0.347	1.81	1.18	1.14
-0.402	0.351	2.23	-2	-0.353		0.76	-0.397	1.43	1.12	1.7
-0.538	0.712	2.12	-1.79	-0.45		0.764	-1.55	1.68	1.09	1.74
-0.584	-0.185	1.21	-2.28	-0.704		0.91	-0.136	1.62	1.4	1.99
-0.82	-0.119	1.57	-1.68	-0.547		0.787	-1.29	2.17	1.15	1.14
-0.642	0.0681	0.48	-1.98	-0.553		0.729	-1.04	1.75	1.13	0.963
-0.72	0.173	0.897	-1.23	-0.393		0.492	0.685	1.71	1.21	0.926
-1.02	0.214	1.34	-1.07	-0.181		0.615	-0.597	1.7	1.13	0.667
-0.505	-0.279	0.531	-0.863	-0.108		1.21	-1.61	1.62	1.3	0.516
-0.139	0.404	1.71	-1.96	0.112		0.341	-0.74	1.86	1.23	1.01
-0.575	0.428	1.02	-1.44	-0.0142		0.137	0.0142	1.55	1.21	1.09
-0.902	0.278	0.0267	-1.18	-0.155		-0.0772	-0.933	1.37	0.941	0.67
-0.607	-0.0522	0.622	-1.36	-0.0734		0.117	-0.272	1.21	0.658	0.935
0.541	0.306	0.911	-0.876	0.0489		0.561	-1.51	1.42	0.589	0.447
0.261	-0.441	1.28	-1.1	-0.114		0.947	-0.803	1.48	0.777	0.511
0.318	0.535	0.719	-1.66	-0.348		0.932	0.28	1.34	0.981	0.139
-0.116	-0.0488	-0.268	-2.43	-0.341		0.432	1.16	1.38	0.899	0.521
-0.325	-0.313	-0.122	-2.01	-0.447		0.0133	0.363	1.44	0.617	0.242
-0.246	0.591	-0.247	-1.04	-0.391		-0.369	-0.768	1.46	0.9	0.0121
-0.661	0.101	-0.194	-1.11	-0.239		-0.308	-0.833	1.54	0.623	-0.0506
-0.42	0.378	-0.599	-1.24	-0.447		-0.213	-1.11	1.77	0.696	-0.639
-0.707	0.275	-0.041	-0.651	-0.494		-0.211	-1.41	1.94	0.763	-0.389
-0.943	0.187	-0.327	-0.933	-0.549		0.0106	-0.353	1.59	0.906	-0.18
-1.11	0.227	-0.664	-0.608	-0.712		-0.297	-0.304	1.98	0.958	-0.631
-1.02	1.84	1.51	-1.05	-0.694		-0.659	-1.33	2.12	0.473	0.0128
-0.747	1.42	0.00481	-0.323	-0.685		-0.644	-0.934	1.37	0.482	-0.221
-1.39	0.9	0.785	-1.36	-0.281		-0.685	-1.88	1.11	0.641	-0.393
-0.697	1.21	0.383	-0.581	-0.283		-0.345	-1.94	0.655	0.59	0.373
-0.793	1.2	-0.728	-0.718	-0.15		-0.379	-0.904	0.574	0.232	0.042
-0.592	1.73	-0.31	-0.832	-0.0709		-0.49	-1.38	0.637	0.252	0.853
-0.325	0.975	1.75	-1.17	-0.00729		-0.11	-1.42	0.325	0.508	0.668
-0.289	1	1.21	-0.97	-0.0186		-0.326	-1.33	0.453	0.335	0.46
0.242	0.838	0.675	-1.16	-0.162		0.105	-1.11	0.418	0.469	0.0138
-0.335	0.133	-0.609	-1.64	0.0225		0.383	-0.933	0.686	0.509	-0.0621
-0.374	0.461	-0.905	-1.38	0.034		-0.157	-0.246	0.575	0.254	0.119
-0.399	0.285	0.675	-0.839	0.0814		0.137	-0.831	0.895	0.0215	0.229
-0.289	0.326	-0.0238	-0.759	0.0127		0.439	-0.63	0.99	0.0608	0.19
-0.394	-0.116	0.145	-0.538	0.0448		0.00203	-1.51	0.991	0.259	0.489
0.491	0.458	0.478	-0.688	-0.0697		0.0783	-1.41	1.06	0.342	0.455
0.272	0.71	0.543	-0.543	0.089		-0.0734	-1.09	1.13	0.144	-0.0877
0.267	0.0388	0.758	-0.426	0.425		-0.546	-1.66	0.776	0.163	0.281
-0.00495	0.552	0.867	-0.54	0.514		-0.0557	-1.57	1.04	-0.0386	-0.177
0.327	0.785	1.5	-0.406	0.714		-0.0993	-1.43	0.721	0.353	-0.703
-0.0605	0.847	1.02	-0.551	0.754		0.272	-1.2	-0.0627	0.321	-0.524
0.17	1.1	1.75	-0.599	0.911		0.0619	0.355	0.724	0.46	-0.483
0.236	0.755	1	-0.367	0.913		-0.16	-1.32	1.71	0.024	-0.213
0.016	1.11	0.00103	-1.05	1.24		-0.191	-0.465	1.7	0.066	-0.193
0.16	0.242	1.63	-0.359	1.43		0.315	-0.7	1.11	-0.136	-0.191
0.979	0.0954	1.02	-0.635	2.06		0.324	-1.18	1.54	0.463	-0.38
1.69	-0.317	-0.355	-0.477	2.46		0.323	-1.53	2.44	0.169	-0.638
1.61	-0.33	-0.0732	-0.721	2.84		0.511	-0.98	1.97	0.179	-0.195
1.22	-0.0481	1.5	-0.638	2.93		0.342	-0.568	1.94	0.0165	0.471
0.663	0.359	1.02	-0.423	3.1		0.0692	-0.351	1.78	0.366	0.529
0.972	0.112	0.43	-0.821	3.03		0.0988	-0.917	1.86	0.448	0.529
0.816	0.275	0.0148	-0.603	3.11		0.317	-0.969	2.07	0.444	0.171
0.971	2.21	0.593	-1.03	3.05		0.316	0.206	1.58	0.58	0.0152
0.869	1.19	1.63	-1.13	3.04		0.11	-1.52	1.43	0.387	0.538
0.634	0.506	1.02	-0.587	3.12		0.115	-0.806	1.54	0.264	0.123
0.659	1.19	-0.388	-1.03	3.2		-0.585	-0.126	0.908	0.395	0.209
0.625	1.26	0.626	-0.533	3.16		-0.348	-0.642	1.04	0.217	0.623
0.662	1.6	0.166	-1.12	2.84		-0.56	-1.66	0.749	0.225	0.382
0.62	1.77	0.109	-0.605	2.64		0.0194	-0.0654	0.434	0.241	0.294
0.433	1.74	0.651	-1.21	2.46		0.652	-1.48	0.762	0.175	0.124
0.344	0.341	0.359	-0.681	2.59		0.383	-1.5	1.11	-0.0933	0.245
0.793	-0.173	-0.489	-0.906	2.42		0.236	-0.235	0.993	0.0115	0.15
0.994	0.175	0.124	-1.02	2.36		0.782	-1.03	1.35	0.126	0.651
1.15	0.166	0.909	-0.636	2.2		0.527	0.379	0.958	0.374	-0.235
0.871	0.615	0.873	-0.67	2.12		0.294	-1.46	0.771	0.236	0.248
1.27	0.837	0.752	-0.849	1.92		0.493	-1.4	1.02	-0.0623	0.266
1.31	0.658	0.471	-0.462	1.79		0.319	0.158	1.1	0.641	0.273
0.971	0.684	1.2	-0.127	1.65		0.457	-2.09	0.98	0.601	0.139
1.45	1.18	-1.03	-0.338	1.63		0.107	-1.43	0.828	0.669	0.463
1.94	1.01	0.739	-0.238	1.64		-0.335	-1.27	1.03	0.536	0.09
2.18	0.89	-0.449	0.339	1.55		0.248	-1.41	0.863	0.563	0.184
1.68	0.118	-0.442	-0.157	1.38		0.0134	-0.859	0.639	0.468	-0.244
1.88	1.48	-0.467	-0.524	1.3		-0.483	-2.17	0.655	0.622	-0.0947
1.51	1.67	-0.505	0.0139	1.12		0.252	-1.3	0.604	0.69	-0.0936
1.07	1.62	0.864	-0.74	1.08		0.0797	0.433	0.881	0.646	0.224
1.09	0.482	-0.00958	-0.61	1.12		0.0176	-0.449	0.378	0.5	0.264
1.26	0.8	0.772	-0.563	1.1		-0.101	-1.13	0.0831	0.5	0.385
1.33	0.873	-0.392	-0.287	1.23		0.264	-1.72	0.627	0.605	0.212
1	0.41	-0.268	-0.688	1.33		-0.247	-2.06	0.118	0.6	0.48
1.42	-0.419	-0.869	-1.2	1.31		-0.349	-0.955	0.0945	0.681	0.71
1.18	0.287	-2.16	-0.0401	1.32		-0.304	-1.16	0.0612	0.729	0.0262
1.32	-0.0439	-2.47	-0.241	1.27		-0.74	-1.44	-0.129	0.67	0.00488
0.982	-0.128	-0.135	-0.294	1.48		-0.788	-0.187	0.153	0.567	0.143
1.02	0.538	-0.542	-1.12	1.22		-0.616	-0.73	-0.0369	0.597	0.213
0.81	0.901	-0.412	-0.994	1.16		-0.894	-0.624	0.0629	0.362	0.534
1.07	1.66	-0.48	-0.396	1.04		-0.477	0.192	-0.161	-0.0054	0.463
0.667	1.74	-1.14	0.349	0.988		-0.752	0.842	0.199	0.0714	0.501
0.845	1.87	-0.475	-0.197	1.3		-0.133	-0.573	0.0815	0.025	0.544
1.01	0.862	-1.55	-0.117	1.24		-0.43	-1.02	0.107	-0.123	-0.05
1.06	1.14	0.131	-0.315	1.23		-0.997	-0.966	0.187	-0.0974	1.03
1.12	1.01	0.249	-0.74	1.46		-1.24	-1.43	0.545	0.213	0.797
0.899	1.31	-0.352	-0.85	1.94		-0.835	-1.09	0.566	0.523	0.395
1	1.76	-0.722	-1.19	2.18		-0.707	-1.47	0.275	0.537	0.423
0.808	0.00892	-0.439	-0.856	2.52		-0.201	-0.419	0.663	0.826	0.255
0.935	0.906	-0.473	-1.03	2.85		0.109	-0.737	0.0552	0.781	-0.195
1.6	0.847	-0.922	-0.858	3.02		-0.377	-2.45	-0.0633	0.876	-0.247
1.73	0.656	-0.162	-0.437	2.9		-0.214	-0.278	-0.523	1.07	-0.0508
2.95	0.797	-1.03	-0.371	2.72		-0.1	-0.189	-0.291	1.17	-0.268
2.98	1.73	-1.3	-0.437	2.71		-0.393	-1.37	-0.109	0.914	-0.385
2.61	2.23	-1.35	-1.03	2.81		0.291	-1.45	-0.21	1.03	-0.229
2.48	2.04	-0.914	-0.936	2.76		0.122	-1.66	0.113	1.07	0.11
2.51	2.09	-0.0452	-0.547	2.55		0.123	-1.51	0.119	0.826	-0.0334
2.59	1.81	-0.141	-0.386	2.59		-0.232	-1.37	-0.135	1.04	-0.542
2.02	1.84	1.7	-0.61	2.58		0.105	-0.81	-0.212	0.845	-0.676
2.58	1.59	0.198	-0.55	2.76		-0.152	-0.448	-0.174	0.881	-0.837
2.41	0.884	0.465	-1.17	2.71		0.287	-1.76	-0.657	1.03	-0.279
2.49	0.681	0.915	-0.56	2.69		-0.66	-0.403	-1.07	0.963	-0.159
2.45	1.61	0.307	-0.571	2.59		-0.0983	-0.84	-1.45	0.691	-0.398
2.65	0.784	-0.29	-0.542	2.67		-0.41	-0.505	-0.77	0.642	-0.587
2.33	0.13	0.894	0.0333	2.43		-0.618	0.032	-0.554	0.306	-0.0486
2.37	0.029	2.03	-0.485	2.44		-0.65	-0.476	-0.406	0.405	-0.389
1.55	-0.168	0.012	-0.115	2.29		-0.808	-0.457	-0.375	0.428	-1.01
2.12	0.686	0.13	-0.488	2.28		-0.768	-0.465	-0.565	0.111	-0.931
2.09	0.994	0.394	-0.335	2.38		-0.821	-1.33	-0.874	0.421	-0.735
2.46	0.0697	-0.487	-0.632	2.02		-0.782	-1.4	-1.22	0.396	-0.449
2.13	-0.0851	0.874	-0.384	2.02		-0.447	-1.57	-1.05	0.718	-0.883
2.34	0.506	0.203	-0.422	2.08		-0.943	-1.13	-1.2	0.272	-0.565
2.39	1.44	1.55	-0.392	1.93		-0.855	-0.0776	-0.729	0.436	-0.949
2.86	0.66	1.24	-1.66	1.75		-0.899	-0.865	-0.743	0.238	-0.665
2.64	0.471	0.0631	-1.66	1.96		-0.874	-0.437	-1.14	0.564	-0.756
2.36	1.11	1.45	-1.76	2.06		-0.638	-0.391	-0.998	0.148	-0.578
1.71	1.44	1.18	-1.72	2.05		-0.584	-1.29	-0.951	-0.208	-0.972
2.17	1.83	2.87	-0.997	2.06		-0.644	-0.467	-1.55	0.0943	-0.679
2.49	1.1	1.6	-1.26	1.84		-0.566	-1.14	-1.5	0.347	0.675
2.78	1.44	0.854	-1.41	1.57		-0.772	-0.0248	-1.94	0.37	0.367
2.52	1.5	0.423	-0.939	1.41		-1.14	-1.04	-2.57	0.257	0.252
1.96	1.62	1.97	-1.04	1.46		-0.021	-1.17	-2.27	0.513	0.516
2.07	2.25	-0.515	-1.02	1.39		-0.405	-1.13	-1.91	0.481	0.466
1.95	1.8	1.41	-1.67	1.18		0.138	-1.31	-1.97	0.293	0.706
2.18	1.48	2.11	-1.47	1.01		-0.255	0.148	-2.47	0.0747	0.772
2.43	1.8	1.57	-1.37	1.11		-0.196	0.226	-2.26	-0.0252	0.749
3.17	2.71	0.805	-1.37	1.02		-0.944	-0.907	-2.47	0.063	0.0915
3.06	1.42	1.93	-1.43	0.909		-0.464	-0.371	-2.35	0.182	0.406
3.18	1.39	1.52	-0.851	0.784		-0.845	-0.514	-2.34	0.0768	-0.483
2.99	1.78	2.77	-1.07	0.786		-1.16	-0.506	-3.13	-0.157	0.161
3.01	2.15	1.92	-1.94	0.989		-1.18	-0.477	-3.37	0.00972	0.253
3.04	2.06	1.73	-1.46	1.17		-1.29	-0.37	-2.95	0.122	0.356
2.71	2.6	1.41	-1.47	1.14		-1.21	-0.978	-2.69	0.847	0.488
2.62	2.13	1.8	-0.892	1.04		-1.17	-0.406	-2.8	1.29	0.321
2.61	1.34	0.4	-1.63	1.1		-0.974	-1.48	-2.49	0.681	0.148
2.51	1.42	0.205	-1.95	1.13		-0.0722	-0.746	-2.1	0.708	0.271
2.49	1.55	-0.799	-1.66	1.1		0.516	-0.505	-2.57	0.541	-0.14
1.94	1.21	0.0897	-1.78	1.09		-0.16	-0.806	-3.17	0.806	-0.275
2.12	1.84	0.664	-1.74	0.873		0.452	-1.02	-2.92	1.09	0.0573
2.43	1.54	1.91	-1.43	0.71		0.695	-1.73	-1.84	1.29	-0.305
1.94	1.51	1.42	-1.37	0.635		0.626	-1	-1.05	0.639	0.691
2.5	1.36	0.751	-1.58	0.716		0.341	-1.25	-0.376	0.355	0.616
1.95	1.09	1.37	-1.37	0.534		1.2	-1.47	-0.386	1.04	0.7
2.2	0.659	1.24	-1.51	0.523		0.596	-1.93	-1.19	1.17	0.371
1.62	0.316	1.63	-1.26	0.497		0.65	-1.23	-1.54	0.979	0.339
2.03	1.12	1.39	-1.17	0.527		0.395	-1.04	-0.348	1.35	0.194
2.13	1.53	0.174	-0.845	0.487		0.036	-0.266	-0.338	1.23	0.414
3.44	0.693	0.973	-0.564	0.349		-0.629	0.221	-0.452	1.06	0.264
3.66	0.74	0.985	-0.253	0.423		-0.875	-0.375	-0.417	1.22	0.0928
4.23	0.502	0.185	-0.554	0.465		-0.778	-1.15	-0.527	0.942	0.551
3.63	0.407	0.428	-0.831	0.355		-0.479	-0.569	-0.623	0.348	0.00555
3.14	0.191	0.846	-1.43	0.253		-0.277	0.0405	-1.08	0.468	0.375
3.7	0.0389	1	-0.9	0.251		-0.69	-1.88	-0.94	0.521	0.0795
4.4	0.685	1.72	-0.87	0.0947		-0.417	-0.0555	-1.2	0.279	-0.0768
5.76	0.889	0.842	-1.13	0.0771		-0.77	-0.114	-0.861	0.325	-0.415
5.42	0.481	0.27	-0.801	0.183		-0.953	-0.675	-0.676	0.708	-0.278
4.88	0.926	0.309	-0.961	-0.0315		-0.34	0.0703	-0.52	0.391	0.0403
5.1	0.402	0.546	-0.94	-0.00341		-0.537	-1.05	-0.645	0.56	0.0622
4.93	-0.0204	1.55	-1.14	-0.251		-0.37	-0.932	-0.949	0.67	0.324
5.01	-0.0779	0.741	-1.52	-0.282		-0.115	-0.792	-0.925	0.58	-0.127
4.99	-0.0779	1.12	-1.4	-0.398		-0.656	-0.366	-0.744	0.885	-0.397
4.6	-0.0797	1.42	-0.898	-0.246		-0.629	-0.375	-0.0813	1.03	-0.00794
4.06	-0.159	0.69	-1.17	-0.277		-1.27	-1.47	0.262	1.33	-0.225
4.28	-1.16	1.34	-0.824	-0.354		-0.322	-1.28	0.383	1.14	-0.372
4.37	-0.664	0.529	-0.533	-0.156		-0.791	0.0504	0.266	1.11	-0.129
4.88	-0.867	0.0677	-0.482	-0.0984		-1.29	-0.83	0.527	0.833	-0.199
4.57	-1	0.824	-0.756	0.128		-0.489	-1.62	0.377	0.782	-0.449
[truncated: 7,151 more rows]
