# Supplementary material for: Metabolic sensing in AgRP neurons integrates homeostatic state with dopamine signalling in the striatum
Source: eLife journal article supplement (doi:10.7554/elife.72668), 2022-01-12
Supplement: fig1-figsupp1-data1 [file FigS1A.xlsx]

## Sheet: Sheet1
	wt																																											ko
2mM	0.284143	0.74224	0.598456	0.253425	0.176586	1.44246	0.647866	2.08305	0.233693	0.608289	0.441558	1.1592	0.576497	0.583893	0.35976	0.408163	1.01785	0.158184	0.474198	0.42191	0.826558	0.586133	1.08089	0.440957	0.533151	0.4314	0.439863	1.19945	0.675287	0.991379	0.649526	0.575636	0.446809	0.264346										0.489914	0.305768	0.45929	0.528121	0.335387	0.744536
5mM	0.26204	0.503546	0.286299	0.160565	0.207191	1.19745	0.694904	1.52331	0.397213	0.715619	0.507837	0.767591	0.43662	0.379333	0.266134	0.381056	0.777778	0.147849	0.442779	0.391766	0.44137	0.517956	0.893673	1.1176	0.471822	0.809883	0.485502	1.61222	1.01582	0.922087	0.448718	0.37182	0.457614	0.75										0.381212	0.201389	0.479211	0.417219	0.930233	0.393152
[truncated: 37 more columns]
