# Supplementary material for: Metabolic sensing in AgRP neurons integrates homeostatic state with dopamine signalling in the striatum
Source: eLife journal article supplement (doi:10.7554/elife.72668), 2022-01-12
Supplement: fig1-figsupp1-data1 [file FigS1E.xlsx]

## Sheet: Sheet1
Agrp GCamp naive														Agrp GCamp 2nd exposure
0.756	-0.137	1.2	2.01	1.12	-1.15	0.429								0.551	-0.598	1.97	-0.0075	-1.62	1.94	-1.46	0.19	0.255	1.45	1.6	-1.17	0.844	2.94
0.719	-0.0432	-0.151	1.85	0.598	-1.24	-0.289								0.494	0.0212	1.87	0.292	-1.24	1.41	-0.978	-0.204	0.0669	2.39	2	-0.766	0.215	2.44
0.732	0.0881	1.09	2.37	1.37	-0.868	-0.483								0.39	-0.287	1.92	-0.0602	-1.03	0.916	-2.37	0.313	-0.107	2.07	1.1	-1.41	-0.193	1
0.694	0.168	0.699	1.63	0.59	-0.849	-0.155								0.213	-0.384	1.72	-0.274	-1.33	0.772	-1.63	1.85	-0.00921	2.81	1.73	0.469	0.121	2.47
0.691	0.173	0.579	1.85	0.264	-0.542	-0.434								0.315	0.468	1.6	-0.677	-1.38	0.321	-1.93	-0.196	-0.267	2.29	1.5	-1.37	-0.547	1.71
0.639	0.297	0.622	1.5	-0.0105	-0.00226	-0.249								0.697	-0.43	1.43	-0.361	-1.37	0.547	-0.751	0.403	0.447	3.83	3.88	-1.41	-0.526	2.03
0.609	0.245	-0.389	3.24	0.477	-0.92	0.00977								0.783	0.342	1.62	0.328	-1.51	0.473	-0.548	0.0663	-0.0622	2.17	2.09	-1.59	-0.52	2.53
0.704	0.395	-0.47	1.86	0.648	-0.472	0.422								0.603	0.275	1.45	0.717	-1.66	0.662	-0.271	-0.00503	0.374	2.62	1.95	-0.773	-1.31	2.01
0.909	0.629	0.978	2.01	1.83	-1.07	0.177								1.65	-0.301	1.56	0.182	-1.5	1	-0.354	1.19	0.00494	2.23	0.334	-1.57	-1.06	0.773
0.982	0.702	-0.336	2.12	0.544	-0.956	-0.663								0.942	-0.143	1.85	0.256	-1.17	1.26	-1.77	0.703	-0.362	1.7	-0.997	-1.89	-0.139	1.3
0.97	0.855	0.469	2.23	1.01	-1.23	-0.202								0.729	-0.159	1.91	0.244	-0.409	0.888	-0.0992	-0.0557	-0.141	1.92	0.257	-0.851	0.0666	1.42
0.929	0.854	1.36	2.15	0.597	-0.884	-0.568								0.394	0.0549	1.79	-0.309	-0.904	1.1	-1.93	-0.28	-0.137	1.56	1.4	-0.39	-0.183	1.04
0.911	0.768	1.45	2.24	0.879	-0.729	-1.18								1.04	0.611	1.85	-0.546	-0.768	0.519	-1.42	1.81	-0.053	0.476	1.4	-2.43	-0.157	0.785
0.836	0.784	0.95	2.36	1.26	-0.668	-1.03								0.228	-0.0346	1.65	-0.205	-0.848	0.62	-0.659	0.548	-0.115	0.769	1.12	-2.12	-0.417	1.35
0.869	1.1	-0.541	1.97	0.158	-1.1	-1.1								-0.211	-0.0946	1.77	0.0564	-0.25	0.362	-0.581	1.04	0.266	2.15	0.521	0.221	-0.256	1.23
0.743	0.964	0.529	1.89	1.3	-1.37	-0.512								0.11	-0.0104	1.39	0.106	-0.156	0.558	-0.283	0.367	-0.244	0.997	0.795	-1.76	-0.538	0.852
0.866	0.776	0.32	1.72	0.136	-1.24	-0.235								-0.0595	0.495	1.28	0.22	-0.107	0.872	-0.583	1.65	-0.266	1.57	0.529	-0.188	0.163	1.24
0.889	1.04	0.85	2.7	1.11	-1.53	0.365								0.133	0.573	1.25	0.427	0.236	1.01	-0.789	-0.456	-1.01	1.56	0.587	-1.85	0.452	2
0.871	0.957	1.64	2.78	1.6	-1.37	-0.0577								0.339	0.619	1.6	-0.0631	-0.517	0.612	-0.315	-0.938	-0.864	0.821	0.568	-1.27	1.08	1.84
0.86	0.49	1.37	2.54	1.19	-1.26	0.124								0.991	-0.0655	1.44	0.449	-0.406	0.451	-0.58	0.706	-0.941	1.14	0.053	-0.791	1.21	0.788
0.71	0.72	0.253	1.94	0.653	-1.16	0.929								1.06	0.509	1.23	0.693	-1.1	-0.0322	-0.461	0.287	-0.503	0.229	-0.1	0.0811	1.55	1.32
0.689	0.688	0.656	1.8	0.554	-0.927	-0.433								1.27	-0.131	1.3	-0.0346	-1.03	-0.497	-1.44	0.187	-0.649	1.32	-0.985	-0.474	1.25	1.83
0.634	0.65	0.0747	1.95	0.376	-1.93	0.152								0.676	-0.347	1.5	0.0445	-0.1	-0.525	-1.71	0.256	-0.807	1.02	-0.727	-0.973	1.29	0.249
0.537	0.819	1.02	1.4	-0.365	-1.89	0.375								0.722	-0.259	1.31	-0.2	0.047	-0.196	-0.896	1.18	-0.301	1.46	0.327	-1.22	1.59	1.06
0.449	0.588	-0.0018	1.22	1.25	-1.21	-0.586								0.59	-0.483	1.05	-0.355	-0.154	0.28	0.258	0.639	-0.756	0.721	-0.608	-1.01	1.43	1.27
0.411	0.397	0.0595	1.3	-0.557	-1.23	-0.0418								0.905	0.434	0.778	-0.181	-0.0417	0.719	-1.37	0.205	-0.174	0.965	0.834	-0.352	1.51	2
0.55	0.139	0.645	1.1	1.32	-0.713	-0.0486								0.532	0.335	0.843	-0.337	-0.611	0.199	-1.09	-0.248	-0.0465	0.916	0.617	-0.775	0.811	1.28
0.508	0.431	-0.0202	1.19	0.806	-1.28	-0.0104								0.537	0.306	0.801	0.00948	-0.976	0.00566	-0.903	0.175	-0.0569	1.71	1.28	-1.2	0.586	0.939
0.505	0.291	-0.405	1.09	1.12	-0.919	0.323								0.521	0.433	0.942	-0.69	-1.62	0.128	-1.11	0.68	-0.127	0.334	0.63	-0.503	-0.275	0.369
0.65	0.353	0.609	1.02	0.404	-1.2	0.481								0.464	1.26	1.03	-0.62	-1.02	-0.501	-1.71	0.91	-0.22	1.55	0.204	-0.763	0.929	0.313
0.61	0.135	0.984	0.823	1.23	-1.65	0.00471								0.696	0.519	0.735	-0.873	-0.542	0.283	-2.04	-0.359	-0.371	1.19	0.479	0.191	0.964	0.378
0.563	-0.0698	-0.399	0.733	0.739	-0.979	0.038								0.34	0.722	0.961	-1.43	-1.36	1.1	-1.69	-0.907	-0.0308	1.03	-0.0227	-0.644	0.264	0.408
0.564	0.245	-0.255	0.893	1.01	-1.8	0.0691								0.262	0.258	0.923	-1.1	-1.35	1.21	-1.53	-0.775	-0.0433	0.812	1.02	-1.37	0.584	0.682
0.523	0.112	-0.432	1.02	0.16	-0.579	0.0245								0.579	0.199	0.92	-0.735	-0.625	0.94	-1.22	0.307	-0.34	1.21	0.286	1.11	0.594	0.282
0.499	0.0269	0.918	0.573	-0.507	-1.57	0.32								0.526	-0.113	1.11	-0.312	-1.16	0.913	-1.31	0.0175	0.0735	1.77	-0.0675	-0.634	0.142	0.142
0.546	0.0841	0.87	0.565	-0.729	-1.26	-0.188								0.414	-0.591	1.27	-0.441	-1.16	0.506	-0.873	-0.335	-0.17	1.34	-0.148	-0.83	-0.0124	0.269
0.523	0.398	0.555	0.697	0.764	-1.12	0.167								0.71	-0.0508	1.21	-0.91	-1.01	-0.137	-0.62	-0.181	0.142	0.251	0.191	-0.161	-0.431	-0.0756
0.414	0.0326	1.48	0.73	-0.905	-1.29	0.466								0.557	-0.227	1.39	-0.897	-1.04	-0.338	-0.977	0.331	-0.146	1.02	1.24	0.31	0.773	-1.42
0.359	-0.515	0.0728	1	1.64	-1.83	0.148								0.346	0.292	1.09	-1.1	-1.09	-0.375	-1.11	1.06	-0.295	0.253	1.16	-1.13	2	-0.53
0.39	-0.712	-0.235	1.52	0.896	-1.02	0.484								0.269	-0.418	1.07	-0.649	-1.05	0.0794	-0.945	1.32	-0.463	0.554	1.08	-0.572	1.46	-1.24
0.323	-0.447	-1.02	1.49	-0.195	-0.209	1.26								0.366	0.167	1.15	-0.764	-1.36	0.0733	-1.48	0.286	-0.505	0.0857	1.58	-0.0752	1.45	-0.0192
0.359	-0.407	0.162	0.93	-0.0382	0.356	0.196								0.268	0.733	1.18	-0.375	-1.6	-0.237	-0.678	0.0564	-0.735	0.134	1.44	0.744	1.46	-0.011
0.217	-0.683	0.865	1.08	-0.923	0.902	1.28								0.435	0.595	1.02	0.0039	-1.97	-0.583	-0.543	0.531	-0.284	0.119	1.01	-0.584	1.27	-0.213
0.243	-0.471	0.726	1.18	-0.157	1.32	0.851								0.239	0.584	1.32	-0.48	-1.77	-0.62	-1.11	1.18	-0.801	-0.855	1.68	-1.3	1.82	-0.0968
0.296	-0.751	1.16	1.25	-0.114	0.383	0.894								0.282	0.451	1.06	-0.802	-1.16	-1	-1.19	0.538	-1.25	0.386	1.74	0.137	1.58	0.995
0.254	-0.768	1.1	1.31	-0.191	1.1	0.87								0.598	-0.135	0.912	-1.02	-1.36	-0.879	-0.584	0.527	-0.65	0.872	2.25	0.454	1.42	1.76
0.322	-0.555	-0.0606	0.927	0.734	0.778	1.09								0.349	-0.323	0.82	-1.31	-1.48	-1.02	-1.19	0.334	-0.243	0.376	1.72	-0.18	1.7	1.19
0.298	-0.307	0.815	1.48	-0.344	0.225	0.87								0.634	-0.594	1.25	-0.39	-1.07	-1.56	-0.225	0.236	-0.153	0.172	1.9	-0.558	1.61	-0.067
0.251	-0.475	0.233	1.15	-0.419	0.622	1.36								0.933	-0.706	0.824	-1.28	-1.98	-1.32	-1.31	0.778	-0.24	0.493	1.76	-0.00448	0.0321	-1.11
0.298	-0.554	-0.933	1.15	-0.401	0.659	0.834								0.542	-0.187	0.781	-0.916	-1.93	-1.78	-0.127	0.0136	-0.493	0.761	0.624	-0.921	1	-1.19
0.434	-0.581	0.225	1.62	0.631	0.0559	0.633								0.543	-0.336	0.559	-1.57	-1.28	-1.56	-0.901	0.493	-0.317	0.366	-0.0728	-0.502	1.17	0.535
0.36	-0.495	0.795	1.68	-0.207	-0.15	1.06								0.598	-0.291	0.671	-1.46	-1.59	-0.993	-0.763	0.193	-0.462	0.909	-0.19	-0.252	-0.174	0.36
0.401	-0.503	0.583	1.82	0.101	-0.0387	0.716								0.866	-0.58	0.66	-1.01	-1.42	-1.62	-0.887	0.297	-1.06	1.07	1.67	-0.398	0.12	-0.296
0.473	-0.345	0.631	2.31	-0.855	-0.184	0.71								0.966	-0.357	0.539	-0.851	-1.36	-1.51	-0.124	0.442	0.374	1.54	2.36	-1.5	-0.394	-0.762
0.553	-0.273	0.643	2.23	-0.582	0.574	1.02								0.735	-0.123	0.579	-1.07	-1.62	-1.48	-0.358	0.0216	-0.415	1.29	2.44	-0.47	-0.16	-0.803
0.531	-0.259	0.723	2.21	-1.16	-0.666	0.92								0.452	0.936	0.771	-1.75	-1.98	-1.76	-0.213	0.225	-0.53	0.288	2.88	-1.04	-0.442	-1.86
0.546	-0.138	1.02	1.81	-0.476	-0.228	0.882								1.17	0.955	0.751	-0.54	-2.19	-1.58	-0.68	-0.0397	-0.388	1.02	1.59	-0.306	-0.384	-1.85
0.715	0.0436	0.788	1.36	0.295	-0.00174	0.998								1	0.561	0.381	-0.76	-1.83	-1.18	-0.197	0.587	0.104	0.45	0.735	-1.6	-0.176	-1.41
0.699	-0.428	1.02	1.48	-0.522	0.655	1.19								0.99	-0.00385	0.712	-0.291	-1.14	-1.46	-0.654	-0.712	-0.168	0.899	0.771	0.119	-0.688	-0.146
0.645	-0.128	1.26	1.94	-0.872	0.779	1.62								1.06	-0.0195	0.552	-0.515	-0.962	-1.44	-0.523	-0.657	0.457	1.23	0.72	-1.23	-0.95	0.296
0.729	-0.184	0.243	2.93	-1.46	-0.364	1.43								1.1	1.04	0.611	-0.661	-1.48	-1.4	-0.893	1.18	0.194	0.571	2.56	-0.412	-0.405	0.502
0.811	-0.653	-0.732	1.74	-3.66	0.207	0.832								1.07	1.65	0.585	-0.619	-1.83	-1.87	-0.989	1.18	0.281	0.3	0.438	-0.333	0.105	0.284
0.753	-0.646	0.257	1.16	-0.895	-0.0273	0.421								0.939	0.72	0.564	-0.616	-1.98	-1.2	-0.415	0.775	-0.216	-0.0787	1.57	-0.39	0.918	-0.851
0.665	-0.177	-0.0532	1.8	-1.16	-0.246	0.992								0.954	-0.84	0.644	-0.669	-2.53	-1.54	0.578	0.977	0.0689	0.88	0.06	0.979	-0.11	-1.13
0.674	-0.424	-0.0191	2.03	-2.65	0.394	-0.0837								1.06	-0.631	0.327	-0.284	-2.24	-1.52	0.704	0.748	0.0868	0.463	0.799	0.163	0.783	-0.155
0.703	-0.262	-0.636	1.74	-1.79	0.476	0.857								0.472	-0.845	0.0574	-0.417	-1.8	-1.35	-0.736	1.19	-0.246	0.0707	1.3	0.136	0.248	0.0952
0.595	-0.37	1.02	1.8	-1.94	2.75	1.05								0.575	-0.439	0.605	-0.807	-1.86	-1.08	-0.81	1.73	0.0215	-0.319	0.446	-0.324	1.39	-0.249
0.575	-0.408	0.669	1.29	-1.86	1.89	1.79								0.764	-0.425	0.747	-1.33	-1.42	-1.09	-0.903	1.01	-0.244	0.0773	-0.755	-0.336	0.573	0.0879
0.635	-0.393	0.386	1.51	-2.72	2.2	1.53								0.935	0.546	0.639	-1.65	-1.94	-1.29	-1.21	0.352	-0.108	0.311	-0.296	0.0869	1.08	-1.03
0.641	-0.0624	-0.397	1.87	-2.42	2.63	1.79								0.293	0.0789	0.716	-1.98	-1.62	-1.56	-1.33	0.166	-0.545	0.907	-0.0133	0.578	0.94	0.334
0.586	0.172	0.394	1.84	-1.14	2.32	1.46								0.0357	0.256	0.663	-2.24	-1.11	-0.852	-0.351	-0.296	-0.384	-0.219	0.323	-0.0544	0.695	-0.12
0.589	0.507	1.42	1.08	-1.79	2.27	0.743								-0.179	0.153	0.431	-1.91	-1.01	-1.04	-1.16	-0.0878	0.0154	0.323	-0.131	0.685	1.19	0.6
0.632	0.318	-0.542	0.983	-2.51	2.37	1.14								-0.563	0.318	0.414	-1.48	-0.447	-1.49	-1.04	0.199	-0.404	-0.543	0.559	2.31	0.852	1.64
0.627	-0.253	0.232	1.75	-2.17	2.11	1.03								-0.627	-0.00641	0.199	-1.24	-0.487	-1.24	-0.87	0.396	0.371	-0.0996	0.481	0.557	0.756	1.2
0.63	-0.447	-0.163	1.45	-3.28	2.22	1.22								-0.783	-1.29	0.367	-1.54	-0.435	-1.25	-0.682	1.37	0.669	0.403	0.687	-0.153	0.968	0.844
0.504	-0.52	-0.24	1.37	-3.44	1.85	1.35								-0.666	0.699	0.00526	-1.57	-0.433	-1.4	-0.899	2.69	0.145	-0.243	-0.583	-1	1.39	1.01
0.478	-0.324	0.325	1.04	-2.05	1.29	0.893								-0.381	0.465	-0.896	-1.29	-0.69	-1.18	-1.55	1.69	0.381	-0.303	-0.0828	0.634	0.446	0.613
0.475	0.0544	0.295	0.639	-1.89	1.37	1.3								-0.0583	-0.147	-0.825	-1.26	-1.12	-0.846	-1.54	0.568	0.238	-0.157	-0.321	1.98	-0.00729	-0.197
0.448	0.0272	0.491	0.372	-2.76	1.34	1.35								0.0552	-0.409	-0.915	-1.07	-0.749	-0.378	-2.51	1.5	-0.232	0.37	0.879	-0.267	0.0541	-0.847
0.533	-0.287	0.118	0.373	-1.76	1.38	1.22								-0.177	-0.545	-1.18	-1.03	-0.246	-0.319	-1.64	1.08	0.449	-0.287	0.652	0.365	-0.593	-0.389
0.45	-0.135	-0.945	0.939	-1.81	1.11	1.89								-0.106	-0.511	-0.973	-0.675	-0.409	-0.425	0.369	1.37	0.212	-0.548	0.442	0.345	-0.832	0.559
0.513	-0.354	-0.203	1.55	-2.2	0.579	1.36								-0.527	-0.0659	-0.711	-0.621	-0.6	-0.517	-0.371	1.04	0.367	-0.151	-1.07	1.18	-1.01	0.685
0.53	-0.17	0.126	1.5	-2.29	0.101	1.39								-0.681	0.518	-0.816	-0.792	-0.633	-0.482	-1.08	1.1	0.729	-0.306	-1.27	2.01	-0.762	1.02
0.558	-0.308	-0.175	1.5	-2.24	0.98	1.11								0.426	0.578	-0.683	-0.269	-0.959	-1.07	-1.87	0.768	0.165	0.0763	-1.09	1.8	-0.271	0.662
0.622	-0.444	0.308	0.509	-2.78	0.0495	1.48								0.437	-0.0162	-0.0345	-0.302	-1.11	-0.903	-1.14	-0.833	0.726	0.554	0.0865	0.352	-0.65	0.561
0.461	-0.355	0.401	1.15	-0.78	-0.314	0.777								0.701	-0.13	-0.205	-0.513	-1.51	-0.039	-1.23	1.34	0.612	1.06	-0.451	-0.211	-0.57	0.0617
0.4	-0.342	0.0688	0.637	0.952	0.215	0.465								0.787	0.443	0.0355	0.105	-1.12	-0.531	-0.933	1.93	0.367	0.452	-0.0889	1.13	-0.952	0.746
0.578	-0.884	0.0543	0.173	-0.63	0.293	0.759								1.36	0.0393	-0.129	-0.725	-0.898	-0.532	-0.621	1.42	1.2	1.09	-1.01	0.531	-1.23	0.841
0.563	-1.1	0.159	0.152	-0.0403	0.412	0.0521								1.51	-1.14	-0.333	-0.619	-1.23	-0.952	-0.666	0.635	1.02	0.788	0.812	0.82	-1.08	0.809
0.81	-1.05	1.4	0.916	0.508	0.432	0.138								1.35	-0.575	-0.271	-0.445	-1.01	-0.59	-1.3	0.746	0.587	0.468	-0.0441	-0.034	-0.78	0.341
0.665	-0.409	-0.0681	0.666	0.979	1.08	-0.122								0.728	0.0501	-0.291	-0.118	-1.1	-0.963	-0.636	2.12	0.303	0.847	-0.381	0.526	-1.6	-0.66
0.539	-0.279	-0.71	-0.445	1.13	0.957	-0.991								0.72	-0.205	-0.356	-0.369	-0.664	0.06	-0.527	1.36	1.01	0.768	0.131	0.181	-0.842	-0.692
0.677	-0.714	0.253	-0.0223	0.259	1.93	-0.165								0.0557	-0.00581	-0.419	0.217	-0.906	0.339	-0.379	2.63	0.719	1.62	0.275	1.35	0.077	-0.501
0.695	-0.416	-0.678	-0.547	0.564	2	0.335								-0.105	-0.885	-0.183	0.0489	-0.852	-0.379	-0.892	2.14	0.613	1.25	-0.735	0.15	-0.309	-0.375
0.685	-0.206	-0.575	0.23	0.79	1.99	0.449								0.101	-0.842	-0.674	-0.223	-0.636	-1.03	-0.552	1.82	0.803	1.39	0.587	1.84	1.24	0.406
0.669	-0.416	-1.16	-0.394	1.89	0.625	-0.528								0.554	-1.62	-0.504	-0.054	-0.834	-1.35	-0.992	0.682	0.955	0.768	-0.578	0.861	0.926	0.66
0.727	-0.561	0.552	0.47	0.277	0.221	0.49								-0.28	-2.01	-0.469	0.0501	-0.702	0.0272	-2.13	-0.309	0.731	1.19	-0.698	0.33	0.841	0.696
0.766	-0.602	0.00151	0.368	0.766	0.798	0.0613								-0.05	-1.44	-0.278	0.211	-0.943	0.0347	-1.63	0.341	1.12	1.02	-0.601	0.852	1.5	-0.776
0.909	-0.56	0.17	-0.0206	1.44	1.13	-0.203								0.55	-1.24	-0.541	0.721	-0.668	-0.0968	-2.05	0.337	1.19	0.951	-0.265	0.258	1.74	-0.00153
1.01	-0.484	0.351	-0.639	0.624	2.58	-0.849								0.62	0.591	-0.804	0.514	-0.457	0.124	-1.18	-0.548	0.704	0.638	0.0802	1.06	1.72	-0.399
0.915	-0.304	0.789	0.214	-0.769	1.88	-0.286								0.682	-0.00814	-0.643	0.343	-1.04	-0.296	-1.63	0.242	1.01	0.463	-1.32	-0.48	1.77	0.534
0.827	-0.336	0.571	-0.635	0.583	2.26	-0.193								0.647	0.846	-1.01	0.562	-1.39	-0.193	-0.31	0.4	0.468	-0.0181	0.0573	1.16	1.59	0.435
0.855	-0.153	1.13	-0.867	1.6	2.3	-0.0307								0.132	0.995	-1.01	0.345	-1.57	0.102	-1.05	0.414	-0.0787	-0.527	-0.797	-0.279	1.84	0.334
0.864	-0.251	-1.19	0.193	2.22	1.93	-0.463								-0.335	1.36	-0.595	0.117	-1.35	0.84	-0.416	-0.641	0.827	-0.0535	0.251	2.46	1.32	0.589
0.798	-0.184	0.15	-0.566	0.371	1.44	0.483								-0.267	0.845	-1.07	0.183	-1.4	0.6	0.128	0.457	0.132	0.429	-0.685	0.532	-0.287	0.491
0.866	-0.502	0.7	-0.489	0.621	1.7	-0.224								0.371	0.556	-1.35	0.406	-1.08	-0.0468	0.285	-0.0626	0.574	1.69	0.0406	0.351	0.706	0.463
0.808	-0.403	0.59	-0.0896	0.893	1.56	-0.0608								2.23	1.18	-1.41	0.484	-1.51	0.152	-1.14	1.57	1.06	1.2	-0.537	0.725	2	0.181
0.648	-0.0558	0.532	-0.484	0.353	1.65	0.51								2.77	0.916	-1.29	0.119	-1.24	0.772	-1.06	0.202	0.912	1.39	1.72	0.641	1.79	-0.247
0.799	-0.196	0.426	0.355	-0.944	0.759	0.48								2.37	0.72	-1.43	-0.384	-1.2	0.591	-0.67	0.793	1.07	1.17	1.06	0.808	1.13	0.201
0.835	-0.672	0.523	0.622	0.276	0.818	1.12								1.95	1.13	-1.01	-0.352	-1	0.959	-0.906	0.915	0.866	0.725	0.998	-0.364	1.57	0.11
0.867	-0.327	1.25	0.12	0.129	0.384	1.77								1.69	0.934	-1.22	-0.0845	-0.33	1.79	0.084	0.323	0.758	0.245	-0.0278	0.379	1.33	0.21
0.799	-0.763	0.497	-0.65	0.243	0.109	0.812								1.31	0.855	-0.971	-0.543	0.282	2.8	0.487	0.631	0.582	0.951	0.633	-0.0902	1.6	0.15
0.716	-0.764	1.06	-1.21	0.219	0.591	0.658								1.72	0.319	-0.577	-0.652	-0.184	3.04	-0.336	0.0384	0.434	1.31	-0.371	0.519	2.63	-0.759
0.747	-0.437	-0.937	-0.0805	0.368	0.505	-0.183								1.94	-0.289	-0.442	-0.702	-0.451	2.51	-0.147	0.081	0.294	1.21	1.13	-0.0906	3.67	-0.394
0.687	-0.194	-0.82	-0.0933	-0.418	0.835	-0.175								1.65	0.528	-0.538	-0.882	-0.689	2.37	-1.66	1.55	0.203	1.2	0.583	0.486	2.59	-0.143
0.745	-0.655	0.362	0.128	-0.825	0.707	-0.315								1.79	-0.121	-0.547	-0.56	-0.966	1.95	-0.284	1.91	0.0183	0.0037	-0.19	1.19	2.95	1.07
0.786	-0.646	0.0712	-0.00736	-0.53	0.331	-0.821								1.83	0.446	-0.474	-0.0608	-0.668	1.85	-0.24	1.2	0.598	-0.00796	-0.231	1.23	1.91	1.48
0.843	-0.836	0.603	0.015	0.374	0.14	-0.171								1.18	-0.287	-0.717	-0.124	-0.788	1.63	-1.29	-0.579	0.589	0.843	-0.54	1.01	1.06	1.9
0.833	-0.757	0.483	-0.566	0.779	0.148	0.478								1.25	-1.05	-0.891	-1.08	-1.27	1.65	-0.597	1.01	0.234	0.867	-0.56	0.343	1.74	1.02
0.91	-0.713	0.415	-0.2	0.578	-0.352	-0.176								1.33	-0.503	-0.663	-1.01	-1.1	1.59	-0.489	1.2	0.588	0.749	-0.639	-0.577	1.92	1.42
0.935	-0.326	0.409	-0.632	0.262	-0.301	-0.216								0.98	0.0171	-0.554	-0.453	-1.14	1.33	0.0647	-0.273	0.805	0.484	0.0655	0.743	1.1	1.44
0.973	-0.542	0.4	-0.364	0.0613	-0.334	-0.162								0.874	0.0346	-0.827	-0.0434	-1.19	1.23	-1.16	0.383	0.944	-0.553	-0.205	2.58	0.878	2.03
0.787	-0.349	1.39	-0.34	1.96	-0.707	-0.159								0.367	-0.274	-0.718	-0.345	-1.28	0.75	-1.1	0.623	0.502	0.223	0.369	1.35	1.02	2.19
0.619	-0.554	0.243	-0.0339	0.288	0.181	-0.584								0.104	-0.347	-0.882	-0.849	-1.26	0.502	-1.73	0.39	0.0338	-0.947	0.309	0.775	1.42	1.99
0.758	-1.16	-0.0721	-0.324	0.305	0.129	0.116								0.216	-0.409	-0.867	-1.53	-0.782	0.741	-0.511	0.402	-0.473	-1.26	0.482	0.673	0.761	1.12
0.751	-1.03	0.956	-0.755	0.294	-0.248	-0.421								0.584	-0.171	-0.575	-0.886	-1.07	0.883	0.0857	0.819	-0.0186	-1.4	1.73	-0.126	0.895	0.32
0.719	-0.706	-0.478	-0.0939	1.87	-0.769	0.152								1.46	0.172	-0.311	-0.125	-0.466	0.338	0.143	0.0874	-0.389	-0.943	-0.416	0.286	1.22	-0.0644
0.625	-0.907	-0.479	-1.06	2.37	-1.13	-0.445								1.22	0.538	0.0705	-0.0516	-0.232	0.757	0.194	1.16	-0.387	-0.157	-0.32	1.34	0.941	-0.0307
0.58	-0.795	1.24	-0.456	0.268	-0.106	0.0347								1.17	0.169	0.203	0.0226	-0.583	0.505	-0.115	0.784	-0.384	-0.3	-1.12	0.245	1.38	1.39
0.51	-0.708	0.571	-0.447	-0.837	-0.405	-0.351								1.34	-0.313	0.239	-0.828	-0.585	0.742	-0.753	0.908	-0.175	-0.148	-0.531	-0.659	1.35	0.933
0.567	-0.844	0.263	-0.383	-0.183	-0.172	0.499								1.15	0.0104	0.295	-0.0838	0.155	0.257	-1.02	-0.0729	-0.26	-1.23	-0.657	1.55	1.35	-0.665
0.541	-0.735	0.315	-0.455	-1.06	0.162	-0.0262								0.804	0.252	0.273	-0.841	0.0137	-0.138	-1.6	0.921	-0.23	-0.61	-1.46	0.54	1.58	-1.21
0.579	-1.15	0.00649	-0.48	-0.0185	-0.00323	-0.303								1.24	0.358	0.127	-0.12	0.12	0.916	-0.807	-0.495	-0.148	-1.12	-0.798	1.95	2.41	-2.16
0.539	-1.03	0.0935	-0.373	0.0113	0.00941	0.291								1.07	-0.205	0.11	0.352	-0.137	2.17	-0.598	0.612	-0.416	-0.952	0.404	0.187	1.28	-0.446
0.427	-0.596	0.505	-0.0651	1.08	-0.948	0.452								1.01	-0.249	0.245	1	-0.669	2.72	-0.902	2.07	-0.121	-0.0775	-0.176	0.39	2.19	-0.0919
0.483	-0.42	-0.58	-0.186	0.0334	-0.0932	-0.498								0.738	0.374	0.0232	0.824	-0.12	2.18	-1.06	1.77	0.0992	0.311	-1.1	0.0501	2.94	-0.0221
0.403	-0.579	-0.691	0.0422	-0.214	-0.519	-0.311								0.763	-0.139	-0.265	0.828	-0.664	1.75	-0.855	1.02	-0.343	-0.356	-0.419	1.29	2.31	-0.302
0.386	-1.2	0.166	-0.451	1.17	0.265	0.00598								0.759	-0.69	0.112	1.65	-1.05	1.25	-0.0769	1.64	0.0582	0.013	0.462	1.03	1.69	-0.574
0.464	-0.99	-0.653	-1.08	0.669	-0.536	0.162								0.758	-0.436	-0.0919	1.59	-0.326	0.931	-0.601	1.05	0.139	-0.922	-0.169	0.429	1.68	-0.279
0.595	-1.18	0.691	-0.429	0.146	0.409	-0.43								0.778	-0.0193	-0.296	1.43	0.2	0.812	-0.0337	1.85	0.216	-0.791	0.266	0.911	2.4	-0.213
0.598	-1.01	-0.562	-0.49	-0.213	0.604	0.00498								0.324	0.00827	-0.252	1.35	-0.514	-0.0361	0.745	-0.00555	0.304	-0.298	-1.53	0.966	2.15	0.11
0.621	-0.806	-0.639	-0.199	-0.786	0.262	0.516								0.142	0.875	0.11	1.55	0.00253	0.484	-0.43	-0.16	0.112	0.248	0.0417	1.12	2.1	-0.428
0.548	-0.975	-0.571	-0.432	-0.422	0.00114	-0.109								0.655	0.429	0.0176	1.66	-0.308	1.88	-0.146	1.08	-0.109	-0.647	0.114	0.551	1.64	0.261
0.331	-0.93	-0.28	-0.169	0.155	0.31	0.756								0.69	-0.161	-0.118	1.14	-0.509	1.23	-0.0177	0.389	0.166	0.09	0.442	0.769	1.94	-0.241
0.342	-1.12	-1.06	0.0988	0.874	-0.141	-0.281								0.194	-0.0801	0.0918	0.707	0.356	0.823	-0.363	-0.051	0.989	-0.555	-0.335	0.944	1.74	0.0613
0.231	-1.19	-0.839	-0.0667	1.74	0.559	0.06								0.327	-0.139	0.287	0.151	0.613	0.786	0.0032	-1.37	0.811	-0.431	0.187	-0.55	1.47	-0.608
0.214	-0.995	0.135	-0.154	-0.53	0.212	0.391								0.45	-0.268	0.204	0.339	0.87	1.38	0.0836	-0.784	0.271	-0.45	0.67	0.483	1.21	-1.17
0.25	-1.06	-0.46	0.0689	-0.0269	0.477	-0.058								0.312	-0.212	0.0144	0.392	0.823	1.53	0.00388	0.808	-0.476	-0.979	-0.741	-0.552	0.394	-0.585
0.243	-1.02	-1.2	-0.418	-0.601	1.02	-0.0223								0.0308	-0.531	-0.0316	0.388	0.887	1.63	1.11	-0.328	-0.302	-0.483	-0.548	-0.609	1.17	0.424
0.205	-1.18	-0.546	0.0123	0.457	0.939	0.0195								-0.105	-0.421	-0.0625	0.387	0.668	1.85	0.574	-0.597	-0.305	0.184	-0.856	0.716	-0.0396	-0.177
0.222	-0.697	-1.02	-0.0422	0.00691	0.543	0.647								0.229	-0.241	-0.452	0.981	0.53	1.67	1.22	-0.669	-0.149	0.0749	0.223	0.155	0.781	-0.821
0.11	-0.807	0.746	-0.113	-0.106	-0.173	0.516								0.156	-0.479	-0.133	1.28	0.0356	2.28	0.909	-0.137	0.14	-0.402	-0.118	0.322	0.398	-0.677
0.0653	-0.767	-0.0165	0.0602	0.654	0.386	0.482								0.014	-0.257	-0.134	2.09	0.0236	0.695	1.16	0.0594	-0.27	-0.111	0.814	0.438	1.49	-1.48
0.024	-0.967	0.184	0.124	1.01	0.204	-0.127								0.464	-0.00443	0.0883	3.43	-0.263	1.44	0.141	0.0854	-0.169	1.21	0.377	-0.69	0.66	-2
-0.0437	-1.14	0.377	0.229	0.259	0.515	0.214								0.606	-1.21	0.371	4.13	-0.295	0.744	-0.21	-0.395	0.436	0.35	-1.24	-0.0356	0.112	-1.8
0.0452	-1.6	0.198	0.0818	-0.485	0.726	0.4								0.58	-1.15	0.123	4.84	-0.197	0.145	-0.182	-0.364	0.0168	-0.179	0.0161	-0.192	0.0859	-1.91
0.0285	-1.29	-0.911	0.538	0.091	0.563	0.0688								0.352	-0.396	0.0649	4.07	-0.338	0.799	0.284	0.0258	1.01	0.691	-0.373	-0.0866	-0.211	-1.22
0.123	-1.19	0.47	-0.062	-0.46	0.759	0.203								0.18	-0.375	-0.176	4.21	0.013	0.667	0.258	-1.08	1.09	1.02	0.448	-3.45e-06	-0.123	-1.04
0.117	-1.21	-0.471	0.687	0.641	-0.17	0.486								-0.298	-0.346	0.0105	4.37	-0.384	0.764	-0.192	0.196	0.879	0.442	0.59	0.515	-0.111	-0.937
0.15	-1.42	-0.391	-0.467	-0.417	-0.395	-0.462								-0.582	-1.42	0.361	3.35	-0.301	0.342	-0.105	-0.314	1.36	-0.374	0.488	-0.578	0.374	-1.4
0.173	-1.4	-0.442	-0.421	0.868	-1.1	-0.312								-0.551	-0.616	0.3	2.93	-0.0811	0.647	0.837	0.0757	1.47	-0.785	1.21	-0.716	0.414	-1.54
0.228	-1.16	-1.76	-0.245	0.719	-0.00143	0.158								-0.543	-0.723	0.24	2.76	0.193	0.0733	-0.305	-0.707	1.52	0.237	-0.618	-0.351	-0.261	-2.2
0.246	-0.782	-1.17	-0.0693	0.16	-0.394	-0.0672								0.14	-0.325	0.25	2.31	0.137	0.577	-0.439	-0.886	1.09	1.25	-0.0971	0.596	-0.399	-1.5
0.271	-0.695	-0.187	-0.354	0.539	0.108	1.16								0.0871	-0.664	0.324	2.07	-0.439	-0.0137	-0.871	-0.973	1.48	1.87	0.433	1.59	-0.199	-0.863
0.339	-0.878	-1.17	-0.281	-0.469	0.39	1.65								-0.352	-1.17	0.238	2.08	-0.351	0.313	-0.766	-0.211	1.36	1.25	-0.73	1.11	-0.436	-1.22
0.301	-0.766	-1.27	0.181	-0.335	1.01	1.44								-0.875	-0.152	0.155	1.51	0.284	0.171	-0.684	-0.882	0.642	1.28	0.176	-0.083	0.00943	-1.02
0.25	-0.932	0.871	-0.493	0.589	0.811	1.21								-0.774	-0.868	-0.00348	1.6	0.0825	1.09	-0.301	-0.156	1.38	2.07	1.19	0.221	-0.311	-1.37
0.147	-0.701	0.382	-1.39	0.529	0.43	0.788								-1.19	-0.906	-0.0306	0.991	-0.534	0.193	0.458	-0.305	0.971	2.32	0.352	-0.256	-0.585	-0.514
0.166	-0.8	0.47	-0.847	0.299	0.563	0.799								-1.43	-0.481	-0.0817	0.581	-0.536	-0.0102	1	-0.706	0.94	2.06	0.571	0.222	0.515	-1.19
0.238	-0.449	-0.834	-0.608	2.13	0.738	0.752								-1.19	-0.539	-0.00523	0.819	0.158	-0.0453	1.1	-0.661	0.596	0.726	0.469	-0.04	0.0689	-0.82
0.373	-0.916	-0.655	-0.417	1.49	0.494	1.66								-1.1	-0.176	-0.211	1.66	0.274	-0.798	1.36	0.124	1.08	0.749	-0.747	-0.152	-0.276	-0.846
0.61	-0.705	-0.576	-0.811	0.843	1.47	0.498								-1.33	-0.136	-0.2	0.789	0.557	0.563	1.11	-1.09	1.21	0.437	-0.337	0.505	-0.175	-1.58
0.724	-0.857	-0.184	-0.642	0.26	0.672	0.783								-0.856	0.126	0.27	0.758	0.103	0.196	1.11	-1.11	1.52	-0.372	-0.711	0.502	-0.518	-1.13
0.847	-0.717	-0.601	-0.462	1.06	0.0648	1.65								-0.594	-0.0744	-0.0985	0.469	0.347	0.0387	1.31	-0.826	0.849	-0.272	0.163	1.51	-0.728	-1.31
0.853	-0.966	-0.65	-1.85	1	-0.117	1.3								-0.566	0.173	-0.131	0.945	-0.0186	-0.42	1.11	-1.43	1.12	-0.97	-0.282	-0.508	-0.399	-1.28
0.771	-1.06	-1.37	-1.46	-0.0758	0.53	1.93								-1.33	-0.987	-0.093	0.0424	0.361	-0.759	0.204	-1.41	1.44	-0.378	0.234	-0.32	-0.526	-0.905
0.734	-0.771	-0.13	-0.963	-0.531	-0.0848	2.29								-0.553	-0.997	-0.291	-0.416	-0.353	0.0461	1.37	-0.485	1.33	0.699	0.185	-0.341	-0.537	-1.51
0.796	-0.844	-0.401	-0.849	0.762	-0.187	1.78								-0.6	-0.719	-0.657	0.692	-0.166	-1.33	0.33	-1.56	0.691	-1.09	0.108	1.63	-0.691	-0.62
0.744	-0.563	-0.112	-0.377	0.399	-0.0156	1.55								-0.208	-1.48	-0.126	1.01	-0.328	-0.565	1.21	-2.28	0.953	-1.78	0.845	0.218	-0.965	-0.128
0.668	-0.778	-0.62	-0.917	0.981	0.199	1.3								-0.439	-0.652	-0.179	0.9	-0.204	-0.513	0.772	-1.58	0.942	-0.854	-0.496	-0.184	0.148	-1.03
0.612	-0.821	-1.07	-0.164	-0.592	-0.332	1.66								-0.362	-1.21	-0.0889	0.199	-0.041	-1.31	1.58	-0.572	0.928	0.171	-0.617	0.352	0.173	-0.838
0.709	-1.22	-0.656	-0.0579	1.54	-1.25	1.74								-0.715	-0.773	-0.537	0.492	0.187	-1.89	0.947	-0.503	1.01	0.285	-0.36	-0.527	0.911	-0.314
0.781	-1.22	-1.03	-1.27	1.22	-1.19	0.604								-0.246	-0.376	-0.197	1.23	0.812	-1.1	0.634	-0.759	1.12	0.455	-0.0258	-0.43	0.996	0.338
0.723	-0.919	-0.251	-0.0967	0.937	-1.88	0.571								-0.275	-0.348	-0.0556	0.221	0.788	-0.372	-0.276	-1.25	1.28	0.744	0.755	-1.38	0.26	-0.636
0.621	-0.804	-0.665	-1.55	0.836	-0.457	0.928								-0.887	-0.811	0.281	0.478	0.956	0.662	0.839	-0.026	1.51	-0.388	1.02	-0.437	-0.472	0.0251
0.554	-1.26	-0.751	-0.668	0.568	-1.31	0.38								-0.845	-0.694	0.537	-0.214	0.28	1.4	1.88	-0.906	1.68	-0.16	0.44	-0.434	0.0327	-1.06
0.458	-0.987	0.0535	-0.169	1.35	-0.881	-0.125								-1.36	-0.904	0.364	-0.341	0.117	1.07	2.1	-0.518	1.62	0.287	0.933	-0.852	-0.678	-0.305
0.589	-0.732	1.01	0.127	0.834	-0.102	0.639								-1.07	-0.435	0.609	-0.0454	-0.174	0.504	1.63	-0.673	1.8	-0.361	0.674	-0.763	0.0824	-0.641
0.48	-1.05	-1.45	-0.749	1.64	0.0998	0.801								-0.605	-0.432	0.802	-0.7	-0.525	0.156	1.63	-0.316	1.79	-0.108	0.0801	-1.96	0.537	-0.929
0.535	-0.877	0.0375	-0.834	1.56	-1.29	0.895								-0.616	-1.2	1.67	-0.61	-1	0.955	1.58	-1.08	1.19	-0.839	-0.479	-0.911	0.276	-0.145
0.541	-0.806	-1.64	0.293	-0.522	-0.226	1.02								-0.649	-1.37	2.24	-0.542	-0.206	1.9	2.2	-0.429	0.934	-1.1	0.374	0.119	0.173	0.184
0.539	-0.804	-1.6	1.48	0.27	-0.0532	1.09								-0.861	-1.52	1.89	-0.0916	0.187	1.33	1.86	-1.28	1.34	-0.237	1	-0.355	0.0835	-0.119
0.395	-1.05	-0.774	0.384	-0.274	0.0128	1.06								-1.08	-2.09	1.93	0.0743	-0.017	1.2	1.71	-1.35	1.23	0.324	-0.727	0.225	-0.162	-0.0886
0.372	-0.984	-0.0976	1.08	0.743	-0.439	0.289								-0.98	-0.817	2.14	0.0378	0.382	1.43	2.07	-2.11	1.17	0.698	0.451	-0.333	-0.0879	-0.346
0.359	-0.841	-1.24	0.518	1.03	-0.609	-0.085								-0.604	-1.66	2.07	-0.322	0.376	2.6	1.09	-1.99	1.27	-0.263	-0.116	-0.6	0.0985	0.207
0.43	-1.14	-0.538	0.366	0.955	-0.341	0.238								-0.0783	-0.422	2.1	-0.535	-0.0838	2.54	0.989	-0.992	1.04	-0.0255	0.025	-2.33	0.0503	-0.254
0.363	-0.98	-0.401	0.294	-0.912	-0.209	0.014								-0.202	-0.776	1.91	-0.184	0.381	2.61	0.646	-2.63	1.27	0.344	0.259	-1.24	-0.127	0.703
0.392	-0.849	-0.311	-0.342	0.978	-0.43	0.529								-0.766	-1.74	1.93	-0.285	0.514	2.2	1.17	-2.02	0.959	-0.199	1.55	-2.42	-0.0514	0.327
0.395	-1.04	-1.08	-0.311	0.587	-0.0224	0.0698								-0.908	-1.77	1.91	-0.4	1.46	2.56	0.666	-1.53	0.107	0.418	0.79	0.157	-1.4	-0.091
0.345	-0.827	0.408	0.837	0.53	0.0783	1.25								-0.272	-0.776	1.64	-0.64	1.08	2.14	0.0424	-0.598	0.619	0.144	1.16	1.45	-0.552	0.0036
0.392	-0.23	0.148	0.745	0.241	-0.301	1.11								0.306	-1.35	1.58	-0.643	0.971	1.97	0.736	-0.726	0.431	0.226	0.702	-0.0623	0.207	-0.563
0.711	-0.432	-0.181	0.0514	0.441	-0.507	-0.0865								0.0374	-2.04	1.8	-0.251	0.754	1.46	1.32	-0.113	0.752	0.967	-1.18	-0.489	0.186	-0.19
0.632	-0.53	-0.591	-0.129	-0.24	-0.114	0.588								-0.122	-1.79	1.64	-0.469	0.222	1.46	1.34	-1.08	0.095	-0.659	-0.719	0.528	-0.448	-1.54
0.761	-0.698	0.15	-1.14	0.319	-0.106	0.971								-0.49	-1.56	1.59	-0.77	0.129	1.12	1.3	-0.621	-0.0519	0.000914	0.475	-1.19	-0.801	-1.66
0.914	-0.549	-0.531	-0.666	0.69	-0.225	0.329								-0.549	-1.19	1.36	-0.363	0.118	0.411	-0.148	-0.113	0.346	-0.63	-0.683	0.181	-0.272	-1.42
1.15	-0.547	-1.1	0.00638	-0.0978	-0.261	0.285								-0.42	-0.538	1.15	-0.425	0.256	-0.376	0.437	-0.895	0.306	0.282	1.26	1.67	-0.305	-1.72
1.43	-0.109	-0.253	0.383	0.714	-0.153	1.69								-0.648	-0.384	1.1	-0.332	0.595	-0.702	-0.0213	-0.0775	0.447	-0.788	0.839	-0.247	-0.287	-1.41
1.86	-0.193	0.112	0.673	1.09	-0.401	1.51								-0.721	0.427	1.22	-1.04	0.626	-0.332	-0.206	0.123	0.85	-1.07	2.7	0.0983	-0.132	-1.86
2.37	-0.162	-0.0103	1.06	0.343	-0.288	1.05								-0.327	-1.14	1.23	-0.987	0.373	-1	-0.024	-0.392	0.231	0.0339	1.23	0.24	0.394	-1.53
2.66	0.285	-0.497	-0.451	-0.274	-0.657	1.83								-0.703	-0.525	1.04	-0.145	0.0252	-1.31	-1.43	0.397	0.566	-0.455	1.78	-0.861	0.0544	-1.35
2.68	0.117	0.481	0.625	0.201	-0.869	1.78								0.159	-0.741	0.893	-0.337	-0.0455	0.657	-0.892	-0.371	1.01	-0.585	1.09	-1.28	0.617	-1.66
2.52	0.0306	-0.35	0.106	0.729	-0.342	2.4								0.665	-0.392	0.847	-0.162	-0.167	1.28	-1.19	-0.172	0.636	-0.909	-0.566	-0.508	1.49	-0.857
2.47	0.0278	-1.23	-0.261	1.69	-0.37	1.43								0.661	-0.315	1.11	-0.0635	0.944	1.79	-0.638	-1.23	-0.331	-0.655	-0.188	-0.727	1.36	-0.103
2.48	0.00604	-0.499	0.647	0.668	0.156	1.39								0.827	-0.672	1.32	0.141	0.722	0.845	-0.943	-1.76	0.495	-0.296	-0.274	0.167	2.19	0.0434
2.42	0.0829	-0.00362	-0.16	1.35	-0.517	2.2								0.602	-1.54	0.991	1.1	0.645	1.53	0.332	-0.833	0.27	-0.844	1.36	-0.165	1.28	-0.0836
2.46	-0.0489	-0.408	-0.533	-0.814	-0.804	1.14								0.261	-1.38	1.13	0.86	0.434	1.59	-0.56	0.332	0.0842	-0.779	-0.874	-1.01	0.637	-0.212
2.37	0.422	-0.556	-0.529	0.284	-0.648	1.29								0.672	-1.3	1.2	0.204	0.6	0.571	0.0302	1.93	-0.408	-1.03	0.921	-1.67	0.521	-0.799
2.31	0.186	0.156	-0.818	0.259	-0.982	0.837								0.811	-0.886	0.906	0.712	0.0336	1.32	0.0715	0.975	-0.723	-0.778	-0.512	0.0991	0.649	-1.39
2.3	0.309	-1.83	0.0489	-0.273	-1.72	1.3								0.524	-0.159	0.775	0.551	0.317	1.42	-1.01	-0.142	0.098	0.0968	-1.18	0.728	0.778	-1.73
2.18	0.247	-0.893	1.25	-0.663	-1.58	0.7								0.0532	-0.509	0.816	0.505	-0.0356	1.05	-0.573	-0.309	0.58	-1.09	-0.457	-0.232	0.435	-1.01
2.32	0.298	-0.337	0.214	-0.435	-0.813	1.29								0.0309	0.00148	1.32	0.263	0.521	1.05	-0.869	0.371	1.02	-1.23	-0.285	-0.487	0.753	-0.558
2.25	0.0244	-0.496	-0.158	-0.968	-1.14	1.3								0.396	-0.696	1.38	0.0615	0.603	1.77	-1.09	0.729	0.851	-1.71	0.687	-0.0254	-0.203	0.223
2.22	0.302	-0.735	0.21	-0.387	-0.606	1.54								0.46	-1.1	1.44	-0.0154	1.05	1.66	-0.302	-0.155	1.79	-0.976	0.845	0.163	-0.00279	0.35
2.17	-0.0243	0.892	-0.2	0.569	-1.15	1.48								0.276	-1.68	1.28	0.228	0.922	1.27	-0.558	0.838	1.3	-1.31	0.195	-0.00629	-0.0527	-0.239
2.06	-0.243	0.443	0.183	1.11	-0.794	1.37								-0.101	-1.29	1.05	0.307	1	1.73	-1.1	-0.29	1.69	-2.58	-0.153	-0.65	0.0886	-0.633
2.11	0.0022	-0.53	0.29	0.329	0.0482	1.48								0.37	-2.12	0.978	0.255	0.651	0.926	-1.44	0.485	2.15	-1.94	-0.413	0.489	-0.0196	-1.22
2.06	-0.331	-0.53	0.0406	0.698	0.185	1.61								0.546	-1.63	1.08	0.175	0.619	1.11	0.221	-0.00392	2.02	-0.776	0.579	-1.04	0.441	-0.786
1.98	-0.338	-0.28	-0.511	-0.573	0.0741	1.25								0.518	-1.7	1.3	0.195	0.981	0.987	0.224	0.665	1.81	-1.16	-0.362	0.571	-0.193	-1.84
1.92	-0.592	0.125	0.496	0.0845	0.489	0.652								0.66	-1.29	1.24	0.64	1.83	0.782	1.1	0.788	1.35	-1.45	-0.0471	0.383	0.396	-0.898
1.92	-0.553	-0.906	-0.24	-0.122	0.208	0.373								0.23	-1.33	1.41	0.469	1.12	0.904	-0.279	0.91	0.214	-1.45	-0.325	-0.658	0.255	-1.61
1.78	-0.408	-0.406	-0.223	0.235	0.173	1.11								0.502	-1.13	1.63	-0.137	0.942	1.06	0.176	0.209	-0.246	-1.35	0.176	0.24	0.345	-0.837
1.82	-0.558	0.293	-0.683	0.521	-0.0227	0.869								0.691	0.0657	1.35	0.266	0.656	-0.0569	-0.404	-0.439	-0.427	-1.03	0.274	-0.931	1.03	-1.15
1.69	-0.534	-0.399	-0.592	0.768	0.567	1.63								0.705	-1.64	1.1	-0.0973	0.784	-0.585	0.029	0.154	-0.495	-1.33	0.477	-0.38	1.08	-0.123
1.58	-0.616	-1.1	-0.0718	-0.233	2.25	1.55								0.683	-1.94	1.03	-0.572	0.464	-0.365	-0.544	-0.138	-0.264	-1.7	-1.02	-1.71	0.41	-0.136
1.59	-0.734	0.252	-0.275	-0.43	2.3	1.15								0.581	-1.1	1.17	-0.2	0.931	0.345	1.31	-0.232	-0.501	-2.48	-0.442	-0.262	0.398	-0.124
1.56	-0.554	-0.668	-0.136	0.103	2.32	2.73								0.791	0.0727	1.09	-0.693	0.581	-0.163	0.368	0.246	-0.314	-1.31	1.18	-0.46	0.332	-0.206
1.62	-0.631	-1.04	-0.68	0.856	2.89	3.55								0.755	-0.246	0.83	-0.926	0.0853	-0.49	-0.293	-0.466	0.333	-1.43	1.06	-0.357	0.04	-1.02
1.63	-0.571	-0.136	-1.19	0.465	2.3	3.78								0.328	-0.852	0.635	-1.03	0.245	-1.2	0.318	-0.17	0.0348	-1.95	-0.199	-0.388	-0.904	-1.38
1.53	-0.631	-1.12	-0.52	-0.12	2.39	3.71								0.393	0.0696	0.602	-1.3	0.0491	-2.07	0.521	-1.33	0.687	-2.29	-1.87	-1.06	0.621	-0.624
1.52	-0.51	-0.0361	0.165	1.25	1.86	3.44								0.705	-0.626	0.725	-1.33	-0.144	-0.928	0.0362	-0.769	0.849	-2.41	0.465	1.02	-0.0917	-0.519
1.58	-0.079	-0.104	-0.0892	0.241	2.02	2.32								0.246	-0.566	0.728	-0.322	0.0158	-1.36	0.524	0.471	0.544	-1.14	1.26	-0.319	-0.368	0.671
1.56	-0.241	-0.214	-0.399	0.957	2.49	2.64								0.931	-0.273	0.874	-0.566	-1.03	-1.13	0.185	0.198	1.31	-1.75	-0.0163	-1.17	-0.563	0.0953
1.53	-0.218	-0.121	-0.222	-0.165	1.82	2.59								0.426	-0.958	0.881	-0.552	-0.499	-0.438	-0.359	-0.158	0.856	-2.07	1.04	-1.74	-0.79	0.379
1.47	-0.405	0.173	0.0346	-0.533	1.87	2.26								0.261	-0.343	0.849	-0.681	0.84	-0.456	0.22	0.564	0.478	-1.96	2.14	-0.968	-0.443	-0.873
1.42	-0.472	-0.71	0.121	0.476	1.72	2.13								0.17	-0.504	0.371	-0.351	1.23	-0.321	0.332	1.19	0.493	-0.834	0.218	-1.4	-0.113	0.322
1.24	-0.478	0.249	-0.979	1.14	1.92	1.55								0.17	-0.759	0.545	-1.34	1.18	0.284	-0.248	0.671	-0.388	-0.637	0.521	0.238	0.533	0.365
1.17	-0.35	-1.07	-0.126	0.898	1.42	0.641								0.3	-0.727	0.576	-0.676	0.666	-0.764	-0.484	0.709	-0.314	-0.473	-1.67	-0.769	0.526	0.196
1.17	-0.342	-0.832	-0.337	1.05	1.19	0.888								0.334	-1.27	0.443	-0.656	0.757	-0.82	0.607	0.132	-0.18	-1.2	-0.568	-0.503	0.401	-0.356
1.14	-0.393	-1.56	-0.573	-0.53	0.854	0.673								0.438	-0.684	0.78	-0.813	1.7	-0.944	0.851	-0.094	-0.229	-1.27	1.48	-0.478	0.898	-1.11
1.09	-0.553	-1.12	0.39	0.0869	1.19	0.279								0.921	-0.517	1.03	-0.642	1.42	-1.29	0.106	-0.265	0.106	-1.06	0.989	0.281	0.277	-0.308
1.01	-0.756	-0.462	-0.718	1.54	1.36	0.178								0.949	-0.102	0.59	-0.583	0.427	-1.08	0.199	-0.134	0.372	-1.54	0.24	-0.919	-0.421	-0.0707
1.05	-0.729	-0.0836	-0.338	1.89	2.09	-0.075								0.798	-0.756	0.707	-0.638	0.61	-1.03	0.308	0.622	0.498	-1.78	0.227	-0.484	-0.424	-0.119
0.947	-0.839	-1.01	-1.26	0.466	2.13	-0.0351								0.495	-0.782	0.629	-0.0347	0.384	-0.976	1.38	0.196	0.275	-1.75	0.422	-1.04	-0.27	-0.119
0.972	-0.558	0.0581	-1.09	-0.23	1.32	-0.842								0.898	-1.2	0.867	1.55	0.0382	-1.45	1.39	0.237	0.014	-2.16	-0.664	-1.06	-0.47	0.121
1.01	-0.627	-1.5	-0.388	-0.762	0.732	-0.123								0.663	-0.791	0.745	1.37	0.0597	-1.27	0.873	0.484	0.537	-1.6	0.813	-0.695	-0.493	-1.41
0.907	-0.834	-0.526	0.26	0.939	1.12	-0.912								0.0283	-1.22	0.87	1.3	-0.0613	-1.5	0.281	-0.282	0.205	-1.87	2.12	-1.71	-0.631	-0.693
0.884	-0.448	-1.01	0.136	0.543	0.94	-0.752								0.274	-1.23	0.77	0.746	0.159	-1.9	-0.843	1.13	-0.0527	-0.749	1.81	-1.35	-0.314	0.268
0.799	-0.193	-0.812	-0.283	0.454	1.45	-0.204								0.715	-0.0185	0.57	0.637	0.872	-0.472	-0.0781	1.14	0.564	-1.33	1.22	-1.11	-0.163	0.844
0.747	-0.789	0.335	-0.225	0.15	0.937	-1.09								0.524	-0.523	0.342	-0.134	0.408	0.395	-0.175	1.1	0.191	-0.495	1.46	-0.561	-0.277	0.336
0.676	-0.882	-0.484	-0.433	-1.52	0.318	0.118								0.951	0.331	0.453	-0.083	0.803	0.754	0.736	1.8	0.251	0.453	0.437	-0.211	-0.234	0.674
0.833	-0.635	0.11	0.205	0.577	-0.0689	-0.369								0.973	-0.848	0.639	-0.577	0.246	0.844	-0.57	0.78	0.578	-0.425	-0.21	0.0574	-0.705	0.832
0.748	-0.606	-0.185	0.271	0.268	0.856	-0.6								0.858	-1.49	0.498	-0.482	0.325	0.981	-0.307	0.567	0.87	-0.363	1.01	0.291	0.306	-0.309
0.722	-0.758	-0.85	0.97	0.245	0.532	-0.992								0.794	-1.4	0.53	-1.01	0.201	0.112	0.52	0.971	0.933	-0.21	1.41	-0.83	-0.62	-1.18
0.628	-0.889	-0.28	0.256	0.119	0.475	-1.16								0.316	-1.38	0.338	-0.767	0.128	-0.123	0.97	1.23	0.883	-0.0666	1.88	-1.8	0.0794	-1.26
0.61	-1.21	0.693	0.184	-0.214	0.942	-0.409								0.873	-1.72	0.42	-0.781	0.0709	0.174	1.24	0.00996	0.955	0.881	0.136	-0.894	-0.0932	0.153
0.593	-1.19	-0.156	-0.092	0.711	-0.118	-0.601								0.467	-1.24	0.567	-0.0461	-0.344	0.0995	1.28	0.376	1.06	0.554	0.384	-0.047	-0.528	-0.711
0.44	-1.02	-0.678	-0.294	0.934	-0.209	-0.163								0.736	-0.924	0.644	-0.234	-0.488	0.964	0.825	1.38	1.22	-0.308	-0.756	-2.4	-0.376	-0.821
0.393	-1.04	-0.107	0.201	0.753	0.138	-0.259								0.766	-0.605	0.855	-0.0516	-0.992	0.96	0.605	1.42	1.05	-0.94	-0.129	-1.65	-0.663	-0.752
0.519	-0.992	-0.598	-0.393	-1.88	-0.0775	-0.693								0.563	-0.253	1.09	-0.115	-0.737	0.361	1.07	0.264	0.588	0.656	-0.147	-0.419	-1.15	-1.32
0.43	-1.21	-1.18	0.0573	-0.86	1.22	-0.56								0.955	-0.637	1.09	0.144	-0.174	0.341	1.13	0.14	0.655	1.16	-0.471	0.233	0.412	-1.64
0.464	-1.15	-0.857	0.501	-1.07	0.467	-0.811								1.81	-1.59	1.09	0.697	1.04	0.801	0.178	0.328	0.722	0.112	0.503	-1.08	-0.619	-1.65
0.437	-1.12	-0.265	-0.319	-0.42	-0.469	-0.987								3.37	-1.01	0.57	0.0806	1.48	0.0593	0.367	0.246	0.557	1.35	0.146	-1.1	-0.17	0.204
0.34	-1.2	0.964	-0.5	-1.16	0.313	-1.17								3.41	-1.07	0.992	-0.435	1.15	-0.561	0.771	1.23	1.15	-0.156	0.412	0.654	-0.567	0.267
0.3	-0.7	-0.526	0.244	-0.167	0.276	-0.859								2.9	-1.46	0.532	0.0823	0.363	0.294	1.01	0.264	1.36	0.994	0.105	-1.18	-1.45	0.312
0.284	-0.871	-0.236	0.264	-1.64	0.88	-0.753								3.14	-0.918	0.804	0.399	-0.366	-0.338	0.98	-0.591	1.91	0.234	0.496	-1.98	-0.667	0.78
0.244	-1.1	-0.053	0.704	0.117	0.336	-1.14								2.98	-0.26	0.536	1.21	-0.0716	-0.274	1.05	-0.608	2.01	0.429	-0.198	-1.49	-0.809	0.288
0.234	-1	0.0533	1.39	-1.81	0.0894	-1.1								1.89	-0.801	0.922	1.62	-0.211	-0.297	0.464	-0.548	2.41	1.2	0.57	-1.23	-0.68	1.24
0.241	-1.06	-0.474	0.778	1.7	0.0976	-1.61								1.59	0.182	0.989	1.72	-0.00237	-0.66	0.503	-1.34	2.34	-0.141	0.833	0.161	-0.536	0.388
0.231	-0.946	-0.0222	0.202	1.01	-0.0884	-0.844								1.43	-0.515	1.24	1.04	-0.348	-1.18	0.283	-0.926	2.01	1.03	1.8	-0.689	-1.08	-0.379
0.184	-0.877	-1.06	0.736	0.64	-0.135	-1.13								0.715	0.323	1.23	0.904	0.339	-0.646	1.5	0.452	1.2	1.28	0.674	-0.521	-1.51	0.0465
0.111	-0.845	-0.924	0.74	1.49	-0.292	-0.929								0.809	-0.313	1.07	1.05	0.641	0.122	0.785	-0.965	1.31	1.81	0.838	-0.289	-1.02	0.145
0.122	-0.75	-1.73	1.14	0.379	-0.63	-0.939								1.66	-0.759	1.2	1.01	0.448	0.792	-0.00455	0.335	0.787	1.76	1.33	1.07	-1.64	0.464
0.0749	-1.64	-1.22	0.63	1.08	-0.344	-1.21								0.617	-0.252	1.32	0.911	0.394	1.58	0.78	1.15	0.96	0.00934	-0.554	-0.0379	-0.463	1.19
0.134	-1.27	-0.703	0.713	1.39	-0.171	-1.32								0.791	-0.699	1.3	0.728	0.569	0.544	0.955	1.16	0.664	0.249	-1.8	-0.577	-1.12	1.96
0.0391	-1.41	-1.12	0.682	0.53	0.166	-1.14								1.3	-1.31	1.16	0.811	1.32	0.618	1.03	1.82	0.532	1.03	-0.618	-2.38	-1.08	1.13
0.0426	-1.01	-0.0968	0.945	-0.256	0.955	-1.34								1.01	-1.06	1.06	0.911	0.685	0.177	0.937	-0.0206	0.685	1.28	-0.155	-1.4	-1.24	0.916
-0.0134	-1.93	-0.00407	0.0686	0.933	1.4	-1.52								0.606	-1.33	1.35	1.63	0.747	0.18	0.552	0.596	0.413	0.0119	0.308	-1.19	-1.87	0.941
-0.0196	-1.36	0.105	0.325	0.0691	1.57	-1.31								0.713	0.131	1.31	1.39	0.62	-0.291	0.551	1.34	0.895	0.445	0.818	-0.769	-0.866	-0.328
-0.0736	-1.28	0.327	0.656	0.359	1.12	-1.65								0.26	-0.649	1.4	0.604	0.666	-0.727	1.04	-0.549	1.01	0.906	0.127	-0.869	-1.42	0.185
-0.12	-0.936	0.577	-0.671	0.957	0.61	-1.3								0.634	0.442	1.32	0.0536	0.116	-1.1	1.57	-0.297	0.865	0.423	-0.536	-2.24	-1.49	0.185
-0.0226	-1.29	0.692	1.01	-0.114	-0.174	-0.884								1.02	-0.136	1.26	0.849	0.633	-0.754	1.42	-0.479	0.0914	1.74	-0.854	-1.15	-1.63	0.0358
-0.155	-1.39	-1.45	0.85	0.308	-0.664	-1.72								0.92	0.145	1.43	1.13	0.611	-1.41	1.75	0.162	0.51	1.11	0.717	-1.39	-1	-0.196
-0.127	-1.64	-0.639	0.314	0.584	-0.51	-1.15								0.643	-0.674	1.03	0.914	-0.000661	-0.755	1.37	0.162	1.26	0.37	-0.976	-2.16	-0.678	-0.942
-0.0842	-1.51	0.553	0.488	0.484	0.166	-0.881								0.56	-0.879	1.21	1.01	0.339	-0.493	0.839	-1.07	1.56	1.47	-0.188	-1.08	-0.652	-0.872
-0.12	-1.07	-0.869	-0.132	-0.168	0.536	-1.75								0.832	1.1	0.941	0.868	0.477	-0.412	0.47	-0.77	1.54	1.62	1.75	0.37	-0.82	-0.642
-0.204	-1.39	-0.65	1.26	0.0678	-1.22	-1.41								0.688	-0.426	0.675	0.611	-0.288	-0.926	0.709	0.0599	0.926	1.29	1.14	-1.05	-1.19	-0.617
-0.247	-1.17	-0.201	1.39	0.487	-0.819	-1.14								0.246	-0.719	0.753	0.85	-0.597	-1.14	0.981	0.107	1.41	1.6	0.251	-1.39	-1.13	-0.00206
-0.336	-1.06	-0.861	0.561	0.713	-0.443	-1.4								0.284	-0.754	0.86	0.451	-0.813	-2.41	0.934	-0.914	1.65	2.23	0.234	-1.78	-0.884	0.343
-0.329	-0.707	-1.6	-0.0846	0.859	0.217	-1.47								0.0434	-0.686	0.936	0.42	-0.644	-2.72	1.37	0.574	1	0.8	1.36	-1.2	-0.713	0.00646
-0.256	-1.07	-0.92	0.43	0.54	-0.385	-1.97								0.0117	-0.775	1.01	0.891	-0.283	-1.93	0.0868	1.05	1.23	1.55	0.0204	-2.04	-0.451	-0.049
-0.28	-0.906	0.773	0.377	-0.136	-0.168	-2.17								-0.558	-0.209	1.07	1.13	0.201	-0.544	1	-0.974	0.392	1.31	-0.304	-1.65	-0.955	-0.389
-0.281	-0.662	0.668	0.739	-0.488	-0.852	-1.97								-0.881	-0.071	0.96	1.04	0.334	-0.343	0.558	0.0404	0.725	1.29	-0.657	-1.92	0.0209	-0.831
-0.257	-0.862	-0.263	1.11	0.536	-1.16	-1.51								-0.375	-0.24	1.13	1.05	0.117	-0.669	1.29	-0.217	0.0298	-0.332	-0.407	-1.53	0.0143	-1.38
-0.368	-0.988	-0.791	1.28	-0.119	-0.481	-1.5								0.41	0.268	1.45	0.601	0.0288	-1.28	1.9	-2.16	-0.515	-0.486	0.502	-1.43	0.529	-1.16
-0.309	-0.385	-0.397	0.992	0.0501	-1.03	-1.24								0.211	0.161	1.52	0.697	-0.0947	-1.84	0.582	-1.85	-0.0986	-1.31	0.1	-1.76	0.316	-0.888
-0.39	-0.566	0.128	1.21	1.29	-1.27	-2.54								-0.0977	-0.00072	1.45	1.28	-0.284	-2.32	0.381	-1.26	-0.403	-0.034	-0.161	-0.584	-0.343	-0.995
-0.357	-0.548	0.135	0.562	-0.16	-0.585	-1.77								-0.0835	-0.309	1.23	0.209	-0.639	-2.18	-0.588	-0.278	-0.571	-0.0101	-0.0917	-2.42	-0.673	-0.622
-0.411	-0.693	-0.796	0.798	0.237	-0.854	-1.13								0.44	1.24	1.1	0.327	-0.662	-1.78	0.769	-0.379	-0.492	0.0605	-1.55	-1.12	-1.01	-1.53
-0.383	-0.563	-1.09	1.05	0.377	-1.17	-0.914								0.0349	-0.138	1.14	0.876	-1.09	-1.15	0.27	-0.146	-0.458	0.236	-0.434	0.044	-0.828	-0.949
-0.33	-0.5	-0.758	0.153	0.46	-1.45	-1.22								-0.589	0.0509	0.978	1.02	-0.859	-0.318	0.372	0.0744	-0.22	-0.0749	-0.185	-0.442	-1.05	0.129
-0.308	-0.455	-1.2	0.251	0.168	-0.436	-0.906								-1.09	-0.314	1.19	0.433	-0.691	-1.04	-0.555	0.175	-0.11	-0.228	0.994	-0.354	-0.977	0.0875
-0.374	-0.563	-1.19	0.0876	-0.0635	-1.11	-1.06								-0.0267	0.493	0.761	0.761	-0.73	-1.4	0.0375	0.101	-0.232	0.793	1.87	-0.545	-1.53	0.123
-0.304	-0.649	-0.955	0.514	0.367	-1.32	-1.41								0.268	0.287	0.914	1.11	-0.871	-1.33	-0.531	1.1	-0.646	-0.0408	1.36	-0.232	-1.24	-0.623
-0.456	-0.772	-1.62	0.283	-1.26	-1.93	-1.69								0.484	0.0404	0.928	1.2	1.3	0.226	-0.779	0.517	0.183	-0.885	1.17	-1.02	0.0992	-0.439
-0.511	-0.66	-1	-0.506	-0.377	-1.63	-0.965								-0.215	0.682	0.816	0.795	2.27	0.416	-0.761	0.285	-0.408	-0.862	0.735	-0.969	0.947	-0.172
-0.485	-0.61	-1.78	0.14	0.492	-0.775	-0.671								-0.446	0.233	0.673	0.652	1.95	0.04	0.0673	-0.502	-0.514	0.427	0.302	-0.748	2.15	1.15
-0.502	-0.631	-1.29	0.767	0.0224	-0.918	-1.57								0.133	0.54	0.262	0.961	2.5	0.366	-0.983	-0.574	-0.919	-0.579	0.0737	-0.915	1.81	0.496
-0.474	-0.666	-1.45	-0.724	0.516	-1.28	-1.24								-0.0545	0.388	0.235	0.0224	2.15	0.285	0.158	-0.26	-0.826	-0.255	0.992	-0.94	0.11	0.816
-0.426	-1.07	-0.877	0.925	1.01	-0.418	-1.54								-0.159	0.191	0.0839	0.22	1.76	0.61	-0.323	-1.3	-0.443	0.77	-0.334	-1.19	-0.216	0.645
-0.574	-0.561	-0.729	0.472	-0.0348	-0.526	-1.66								0.0763	-0.857	0.0594	-0.345	0.838	-0.894	-0.713	-0.701	0.648	0.275	-0.858	-0.681	-0.512	0.233
-0.41	-0.852	-1.07	-0.497	-0.243	-1.42	-1.34								0.262	-1.04	-0.298	-0.686	1.27	-0.0323	-0.211	-0.563	0.436	1.01	0.966	-1.19	0.0387	-0.589
-0.481	-1.03	-0.252	-0.0499	0.768	-1.26	-1.84								0.115	-1.79	-0.126	-0.786	1.18	0.535	-0.523	1.77	0.196	0.952	-0.247	0.269	0.087	-0.771
-0.514	-0.744	-1.2	-0.134	0.591	-2.3	-0.682								0.177	-1.34	-0.0436	-1.31	0.793	0.0864	-0.925	0.645	0.446	0.313	-0.71	-0.00714	0.022	-0.409
-0.621	-0.599	-0.0427	-0.12	0.523	-1.75	-1.32								-0.337	0.0781	-0.302	-0.862	0.707	-0.177	-0.567	0.704	0.739	0.939	-0.438	-0.77	-0.611	0.853
-0.569	-0.954	-0.198	-0.168	1.14	-1.72	-1.51								-0.712	-0.676	-0.235	-0.529	1.44	0.0741	-0.675	0.789	0.607	0.383	0.536	0.134	-0.0854	1.06
-0.533	-0.816	-0.349	-0.0954	0.659	-1.38	-1.92								-0.766	-1.01	-0.335	-0.507	2.78	-0.136	-0.689	0.539	0.857	0.566	-0.555	-0.404	-0.362	1.09
-0.541	-0.649	-1.12	0.743	2.75	-1.35	-1.58								-0.65	-0.652	-0.314	-0.213	3.74	-0.0852	-1.83	2.27	1.09	0.363	1.13	-0.596	-0.404	0.594
-0.663	-0.433	-0.664	0.0111	0.0246	-1.83	-1.21								-0.0502	0.156	-0.391	-0.579	3.29	-0.18	-1.32	1.46	0.965	0.461	0.0335	-1.79	-0.449	0.727
-0.676	-0.346	-1.66	-0.542	1.02	-1.47	-1.75								-0.494	-0.294	-0.242	-0.651	2.56	-0.157	0.328	1.37	0.518	-0.972	0.327	-1.29	0.199	-0.466
-0.644	0.254	-1.62	-0.89	0.902	-1.12	-0.32								-0.557	-1.16	-0.473	-0.848	2.63	0.392	-0.465	0.507	0.99	-0.658	-0.633	-2.1	0.373	0.72
-0.67	0.143	-1.22	-0.749	0.125	-0.966	-1.64								-0.651	-0.782	-0.684	-1.67	2.02	-0.0654	-0.323	1.67	0.477	-1.56	0.55	-0.371	-0.0137	0.383
-0.641	0.292	-0.542	-0.564	0.302	-0.73	-0.764								-1.24	-0.47	-0.588	-1.67	1.92	0.444	-0.177	0.0651	0.256	0.603	0.0361	-0.317	-0.465	-0.045
-0.703	-0.525	-1.06	0.438	-0.713	-0.727	-1.62								-1.63	-0.599	-0.226	-1.39	1.76	0.382	-0.993	0.374	-0.0814	2.69	-0.775	-0.0897	-0.929	1.46
-0.732	-1.8	-0.224	0.294	0.373	0.675	-1.4								-1.73	0.111	-0.76	-1.53	1.77	0.456	-1.36	-0.658	0.0269	1.88	-0.456	-1.98	-0.765	1.08
-0.706	-1.41	-0.532	0.32	2.04	-0.286	-1.43								-1.39	0.0268	-0.818	-1.73	2.13	0.743	-1.59	-0.744	-0.065	-0.279	0.767	-0.616	-1.17	0.853
-0.714	-0.823	-0.218	0.175	0.853	-0.479	-0.632								-1.65	-0.62	-1.05	-1.19	2.34	0.947	-1.27	0.266	0.512	0.774	0.973	-0.598	-0.791	0.00363
-0.654	-0.643	-0.729	-0.121	-0.239	-0.349	-0.735								-1.71	-0.509	-0.961	-0.243	2.02	0.742	-1.29	-0.269	1.09	0.102	-1.48	0.544	-0.105	-0.618
-0.731	-0.873	-0.354	-0.783	0.0397	-0.384	-0.804								-1.89	-0.986	-1.02	-0.232	1.57	1.01	-1.1	-0.271	0.694	0.664	1.52	-0.048	-1.04	0.0445
-0.702	-0.963	-1.7	-0.495	-0.234	-0.363	0.116								-1.66	-0.497	-0.548	0.223	1.53	0.128	-0.872	-0.842	0.716	0.178	0.11	-1.65	-0.809	1.38
-0.699	-0.635	-1.53	-0.898	1.2	-0.389	-0.0917								-1.64	0.179	-1.01	0.47	1.73	-1.1	-1	0.024	0.192	0.323	-0.831	-0.989	-2.21	2.7
-0.693	-0.544	-1.49	0.503	0.836	-0.489	-0.598								-1.8	-0.2	-0.743	0.142	1.81	-0.26	-0.949	1.48	0.22	0.312	-0.215	-0.779	-1.45	3.25
-0.771	-0.675	-0.693	-0.854	-0.164	-0.923	-0.49								-1.26	-0.00388	-0.924	0.677	1.58	-0.302	-0.554	-0.726	-0.118	-0.198	0.119	1.1	-1.68	2.88
-0.72	-0.449	-0.117	0.408	-0.542	-0.0536	-0.266								-1.85	-0.425	-0.449	0.335	1.35	0.264	-0.778	-0.0318	0.995	-0.0958	0.581	-1.58	-1.05	2.03
-0.644	-0.685	-0.581	-0.6	0.741	-0.381	-0.281								-2.57	-0.836	-0.967	0.046	1.3	-0.313	-0.382	-0.743	0.236	-1.47	0.634	-0.913	-0.922	1.36
-0.681	-0.368	-1.18	-0.695	-0.0222	-1.04	-0.437								-2.68	0.0711	-0.897	-0.0246	0.94	-0.0299	-0.00279	-0.612	0.565	-0.349	0.834	0.702	-1.3	2.05
-0.705	0.208	-1.07	-1.25	0.959	-1.49	0.087								-1.41	-0.0655	-1.15	-0.374	0.631	-0.579	-0.761	-0.717	0.495	0.442	0.625	0.919	-1.06	2.14
-0.68	0.227	-1.21	-0.395	1.24	-0.742	0.52								-0.435	1.64	-1.07	-0.557	0.853	-0.695	-1.81	-0.128	1.2	-0.641	1.14	0.314	-1.12	2.13
-0.673	0.362	-2.14	-0.0293	-0.965	-0.685	0.478								-0.324	0.719	-1.3	-0.595	0.743	-0.853	-2.03	-0.983	0.958	0.773	1.9	0.764	-1.1	1.63
-0.718	0.233	-0.24	0.162	0.844	-0.468	-0.0361								-0.86	0.795	-1.07	-0.544	0.654	-0.199	-1.35	0.331	0.709	0.332	0.394	0.232	-0.911	0.121
-0.742	0.406	-0.756	0.767	1.37	0.306	-1.04								-0.865	0.531	-1.06	-0.434	1.63	0.554	-1.5	-1.16	1.01	0.482	-0.507	0.904	-0.851	0.285
-0.767	0.0398	0.183	-0.0973	0.862	0.61	-0.617								-0.53	-0.509	-0.799	-0.413	1.47	0.345	-1.08	-0.264	0.765	-0.482	-0.713	-0.217	-0.267	0.106
-0.872	-0.0232	-0.894	-0.313	0.372	0.152	-0.132								-0.604	-1.73	-0.597	-0.137	0.843	0.13	-0.691	-0.671	0.379	-0.577	-0.496	0.295	-0.364	0.875
-0.828	0.473	-2.24	0.0503	1.18	-0.258	-0.909								-0.507	-0.428	-0.814	-0.409	0.659	-0.167	-0.462	-1.14	0.387	-0.402	1.28	0.16	-0.641	1.51
-0.801	0.405	-0.526	0.599	-0.0422	0.544	0.444								-0.744	0.345	-1.05	-0.446	1.08	0.238	-1.43	-0.122	0.684	-1.02	1.01	-0.0053	-0.506	1.2
-0.811	-0.844	-1.43	0.488	-0.034	-0.64	0.753								-0.52	1.49	-0.853	-0.284	1.02	-0.253	-1.73	0.798	0.115	-0.278	0.728	-0.237	-0.923	1.77
-0.83	-0.265	-0.776	0.375	0.0096	-0.207	0.224								-0.646	0.944	-1.02	-0.881	0.88	-0.345	-1.14	0.349	0.278	-0.979	0.154	-0.397	-0.281	0.365
-0.808	-0.66	-2.07	0.765	0.656	-0.342	0.168								-0.821	0.0462	-1.19	-1.02	1.05	-0.506	-0.838	-0.855	0.633	-0.578	-0.161	-0.322	0.105	-0.126
-0.869	-0.59	-0.899	-0.0685	1.28	-0.434	0.667								-1.04	0.691	-1.28	-0.831	1.43	-0.708	0.306	-0.292	0.761	-0.817	-0.695	0.259	-0.169	0.152
-0.849	0.0692	-1.53	0.714	-0.284	-0.337	0.771								-1.19	0.788	-1.32	-0.692	0.977	-1.11	-0.596	0.177	0.426	-1.33	-0.316	0.677	0.323	0.0755
-0.93	0.33	-0.893	0.422	0.104	-1	0.374								-1.07	0.231	-0.793	-0.245	0.778	-0.567	-1.37	-0.722	0.278	-1.99	-0.687	1.35	0.34	0.0594
-0.868	0.29	-1.56	-0.387	-1.03	-1.37	-0.568								-1.03	0.292	-1.12	0.0708	0.28	-1.16	-1.87	1.86	0.362	-1.44	0.00646	0.525	-0.294	0.672
-0.811	0.0486	-0.325	0.366	1.44	-1.48	-0.483								-1.05	0.944	-1.4	0.435	0.463	-0.715	-1.12	0.53	-0.358	-1.25	0.269	-0.737	-0.271	-0.121
-0.851	0.267	-0.717	-0.302	1.33	-1.53	0.101								-1.03	0.953	-1.25	0.565	0.64	-0.728	-0.94	0.608	0.071	-0.9	-0.49	-0.332	0.0305	-0.313
-0.89	0.244	-0.717	-0.33	1.11	-1.34	0.389								-0.732	0.929	-0.804	1.28	0.408	-0.902	-1.19	0.883	-0.502	0.216	0.0852	0.233	-0.109	0.523
-0.797	0.337	0.4	0.065	-0.522	-0.386	0.0857								-0.813	0.0563	-0.811	0.889	0.334	-1.67	-0.631	0.323	0.315	-0.0766	-0.0631	0.141	-0.0326	0.427
-0.903	0.269	0.167	-0.06	0.198	-0.932	0.273								-0.667	-0.884	-0.551	1.22	0.17	-0.975	-1.17	0.3	0.285	-1.72	0.884	1.02	0.235	0.846
-0.94	0.307	-1.48	-0.865	-1.47	-1.39	0.142								-0.686	0.181	-0.595	0.949	0.596	-1.05	-0.473	2.22	0.633	-0.787	0.801	1.36	0.0819	0.877
-0.881	0.331	-0.587	-0.312	-0.585	-1.49	-0.243								-1.05	-0.45	-0.684	1.26	-0.352	-0.859	-0.972	1.18	0.925	-1.4	0.512	1.5	-0.303	1.24
-0.863	0.698	-1.64	-0.0335	-1.5	-0.602	0.116								-1.42	-0.591	-1.21	1.21	-0.677	-1.09	-1.48	0.322	0.56	-1.18	0.446	1.66	-0.694	1.17
-0.935	0.168	-0.712	-0.0758	-1.17	-1.75	0.0155								-1.63	-0.315	-0.952	0.663	-1.17	-1.26	-0.392	1.15	0.981	-0.575	1.36	0.901	-1.46	0.871
-0.939	0.324	-1.19	-0.107	-1.49	-0.737	-0.348								-1.47	-1.05	-1.05	0.387	-0.72	-1.15	-0.86	1	1.53	-1.59	0.603	0.106	-1.3	1.19
-0.886	0.26	-1.15	0.00265	-0.706	-0.796	0.0295								-1.38	-0.516	-0.559	0.666	-0.322	-1.59	0.29	0.5	0.539	-0.877	-0.0872	-0.395	-1.28	1.12
-0.871	0.359	-0.631	0.474	-1.53	-0.26	-0.471								-1.3	-0.489	-0.632	0.66	-0.522	-1.06	0.0723	0.112	0.238	-0.782	1.4	2.34	-1.68	0.677
-0.95	0.346	0.108	-0.612	-1.74	-0.608	-0.943								-0.634	-0.78	-0.751	0.845	1.12	-0.63	0.377	0.332	0.332	-0.393	0.323	1.24	-1.12	0.467
-0.979	0.261	-1.28	-0.645	-0.762	-0.25	-0.524								-0.306	0.505	-0.997	0.868	1.94	-0.372	0.64	0.805	0.221	-0.373	0.839	1.33	-1.45	0.692
-1.04	-0.182	-1.89	0.484	-1.82	0.0185	-1.45								-0.862	-1.63	-1.06	0.828	2.17	-0.36	-0.136	1.29	-0.0321	0.254	-0.221	0.198	-0.841	0.118
-0.874	0.353	-0.699	-0.273	-0.891	-0.962	-1.54								-0.707	-0.481	-1.01	0.923	1.88	-0.806	-0.313	0.532	0.106	0.132	0.457	0.328	-0.699	0.379
-1.01	-0.0972	0.139	0.313	-0.92	-1.01	-2.19								-0.571	-0.086	-0.944	1.2	1.51	-0.445	-0.43	1.2	0.063	-0.444	-0.429	0.282	-0.928	0.101
-0.987	-0.0689	-0.978	0.646	-0.588	-0.61	-1.21								-0.796	-0.0946	-0.695	0.714	1.71	-0.374	0.173	1.83	-0.233	-0.977	0.545	1.65	-0.41	-0.927
-1.03	-0.102	-1.67	-0.0992	-1.7	-1.69	-0.887								-1.36	-0.399	-0.56	0.323	0.7	-0.848	0.619	0.734	-0.108	-0.518	-1.7	-0.568	-0.48	-0.928
-0.973	0.0962	-0.0149	-0.424	-1.94	-1.62	-0.562								-2.05	-0.261	-0.796	0.294	0.947	-0.907	1.35	0.702	0.0596	-0.463	-1.57	0.296	-1.24	-0.679
-1.03	-0.0828	-0.482	-0.327	-1.42	-0.192	-0.289								-1.59	-1.1	-0.755	0.0875	0.738	-0.417	-0.309	1.65	0.0695	0.176	-1.79	0.106	-1.55	-1.42
-1	0.764	-1.02	0.19	-0.928	-0.465	-1.88								-1.06	-0.118	-1.22	-0.319	0.786	-0.188	1.49	2.18	0.295	0.489	0.652	1.4	-1.17	-1.87
-1.01	0.297	-0.167	0.845	-0.831	-0.326	-2.27								-1.25	1.01	-0.906	0.00508	0.492	-0.487	1.31	1.78	0.631	0.691	-0.0735	0.0152	-1.39	-1.53
-1.07	0.402	-1.69	0.759	0.392	-1.5	-0.744								-0.922	-0.27	-0.792	0.706	1.54	-0.132	0.689	0.917	1.04	0.612	0.832	-0.612	-1.13	-1.57
-0.984	1.01	-0.847	0.671	-1.09	-1.5	-0.0623								-0.989	0.164	-0.887	0.83	1.32	-0.898	1.76	1.15	1.39	0.43	0.564	1.34	-1.35	-1.11
-1.07	0.518	-0.59	0.167	-2.07	-3.2	-0.246								-0.935	1.23	-1.01	1.24	1.36	-0.392	2.47	-0.551	1.73	0.163	0.455	1.36	-0.961	-1.13
-1.05	0.567	-0.613	-0.142	-1.48	-2.99	-0.379								-1.03	0.124	-1.07	0.894	1.81	-0.34	1.74	-0.139	1.26	-0.173	0.772	-0.101	-2.28	-0.569
-1.06	0.997	-0.0405	0.0414	-2.8	-1.28	0.115								-1.64	0.287	-1.05	0.815	1.07	-0.781	0.33	-1.25	0.892	0.185	-1.18	0.83	-1.05	-0.959
-1.11	1.06	-0.157	0.347	-1.57	-2.04	-0.317								-2.28	-0.0287	-1.15	1.32	0.771	0.254	1.05	-1.53	0.974	-0.286	-0.268	1.93	-0.594	-0.45
-1.04	1.26	-0.349	-0.11	-0.702	-0.464	-0.0156								-1.78	-0.318	-1.2	0.92	0.456	0.641	1.67	-0.452	1.06	-0.0702	-0.336	1.62	-0.782	-0.316
-1	1.44	-0.786	-0.268	-1.94	0.0316	-0.531								-1.77	0.274	-1.23	0.508	-0.106	0.718	2.13	-0.954	0.989	-0.35	-0.0773	0.0124	-0.801	-1.38
-1.09	1.71	0.17	0.101	-1.5	-0.402	-0.0878								-2.5	0.188	-1.19	0.416	-0.284	0.0887	2.32	-1.68	0.764	0.17	-0.183	0.203	-1.13	0.225
-1.09	1.36	-0.542	-0.695	-1.8	-0.873	-1.06								-2.92	0.785	-0.948	0.564	-0.151	-0.56	1.12	-1.46	0.272	-0.522	-1.14	0.122	-1.32	0.54
-1.06	1.61	0.329	-0.905	-1.06	-1.1	-1.29								-3.05	1.31	-0.951	2.07	-0.0351	-0.563	0.665	-1.31	0.267	-1.1	-0.574	1.54	-0.365	0.82
-0.945	2.17	-0.632	-0.193	-2.06	-0.776	-0.977								-3.11	0.644	-0.994	1.62	0.0648	-1.28	0.552	-1.81	-0.13	-0.111	-0.351	1.09	-0.379	1.76
-1.06	1.92	-0.324	0.143	-0.93	-0.69	-0.58								-2.45	-0.157	-0.838	2.01	0.213	-0.882	1.01	-2.03	-0.187	-0.137	-0.311	1.64	-0.229	1.02
-1.09	2.14	1.66	-0.0216	-2.57	-1.15	-0.594								-2.83	0.0927	-0.753	1.08	0.422	-0.742	0.489	-1.25	-0.672	0.524	-1.09	0.947	-0.143	0.17
-1.05	2.8	0.847	-0.52	-1.16	-0.767	-0.792								-2.71	-0.0352	-0.935	0.489	-0.075	-1.06	-0.284	-1.31	-0.293	0.116	-0.77	0.542	-0.174	1.03
-1.06	2.15	-0.377	0.147	-1.33	-1.11	-0.47								-2.93	-0.253	-1.02	0.725	0.0669	-1.38	0.69	-1.85	-0.475	-0.0618	-0.783	1.58	-0.268	0.764
-1.06	2.33	-0.158	-0.521	-1.27	-0.835	-0.23								-3	0.355	-1.18	0.966	-0.852	-1.45	2.1	-3.23	-0.791	-0.484	-0.0312	0.156	-0.878	0.892
-1.05	2.44	0.186	-0.244	-1.36	-0.831	-1.13								-2.91	0.162	-1.28	1.58	-0.47	-2.05	1.62	-2.41	-0.731	-0.218	-1.05	1.92	-0.523	1.09
-1.07	2.3	0.339	-0.0576	-1.97	-0.36	-0.616								-2.29	-0.266	-1.24	1.02	-0.361	-2.28	1.68	-3.32	-0.65	-0.533	-1.03	1.69	-0.589	0.885
-1.02	2.81	0.888	-1.17	-2.13	-0.643	-0.625								-1.33	-0.0477	-1.41	0.966	-0.451	-1.99	1.39	-2.74	-0.89	-0.643	-0.608	2.14	-1.08	0.22
-1.01	2.57	-0.382	-1.2	-1.46	-0.535	-0.722								-1.62	1.11	-1.21	1.22	-0.898	-2.29	2.13	-2.51	-1.23	-0.637	-0.213	0.982	-0.929	-0.433
-1.02	2.78	0.923	-1.02	-0.776	0.311	-0.348								-1.12	-0.45	-1.17	1.05	-0.294	-1.45	0.582	-1.37	-1.07	-0.288	-1.2	0.837	-1.15	-0.355
-1.04	2.5	-0.264	-0.686	-2.25	-0.847	-0.211								-1.01	-0.996	-1.33	0.765	-0.779	-0.509	0.826	-1.46	-1.34	0.358	-1.25	-0.509	-0.733	0.272
-1.16	2.46	0.764	-0.782	-0.405	-1.34	-1.22								-0.972	0.47	-1.17	0.52	-1.09	-0.454	1.42	-2.18	-1.5	0.467	-0.98	0.31	-1.12	0.454
-1.06	2.61	1.32	-0.786	-0.324	-0.946	-0.173								-1.15	0.285	-1.41	0.166	-0.728	-0.513	2.07	-2.12	-1.24	0.862	-0.659	1.62	-0.832	-0.62
-1.12	2.29	1.32	-0.939	-0.842	-1.03	-0.787								-0.764	0.701	-1.22	0.205	-1.01	0.854	2.47	-1.69	-1.82	0.196	-2.14	1.49	-0.702	0.612
-1.01	2.15	0.538	-1.02	-0.563	-0.758	-0.385								-0.721	0.0432	-1.23	-0.139	-1.5	1.42	1.2	-1.66	-1.62	0.113	-0.496	0.648	-0.546	1.17
-1.05	2.54	0.818	-0.978	-1.02	-0.21	-0.141								-0.862	-0.395	-1.26	0.518	-1.11	0.71	0.451	-1.03	-1.06	0.703	-1.82	1.4	-0.423	0.266
-1.07	1.64	0.688	-1.31	-0.273	-0.987	-0.506								-0.902	-0.554	-1.37	0.29	-1.05	0.636	1.31	-0.5	-2.06	-0.501	-1.82	0.24	-0.672	0.772
-1.01	1.41	2.93	-0.908	-0.243	-0.197	0.257								-1.05	-0.272	-1.26	0.0782	-1	0.61	2.08	-0.838	-2.05	-0.4	-2.17	0.273	-0.467	0.432
-1.03	0.824	2.38	-1.22	0.538	-1.37	0.0302								-1.09	0.554	-1.15	-0.37	-1.61	-0.528	1.98	-0.494	-1.94	0.128	-0.9	0.226	0.209	0.725
-1.02	0.99	1.38	-0.98	-1.02	-1.75	-0.229								-1.14	-1.46	-1.06	-0.322	-1.32	-0.0185	1.9	-2.13	-2.17	-0.0229	-2.69	2.02	0.317	-0.485
-1.1	1.07	1.94	-1.86	0.0699	-1.11	-0.865								-1.24	-1.37	-1.12	0.0681	-1.76	0.291	1.71	-1.79	-1.96	0.0176	-0.554	0.272	0.245	-0.959
-1.2	1.09	1.8	-0.869	-0.652	-0.545	-1.35								-1.32	-0.437	-1.1	-0.331	-1.76	1.21	1.08	-0.728	-1.64	-0.761	-1.61	-0.25	-0.796	-1.29
-1.07	0.663	1.43	-1.24	-0.958	-0.551	0.355								-0.98	-0.513	-1.4	-0.997	-1.34	1.3	1.03	-1.33	-2.51	-0.067	-0.734	0.0994	-0.909	-0.248
-1.08	1.11	1.88	-0.497	-1.7	0.136	-0.162								-1.08	1.29	-1.36	-1.55	-0.962	0.607	0.663	-0.85	-1.8	-0.508	-1.7	0.831	-0.503	0.0432
-1.16	1.3	1.98	-1.29	-0.589	0.167	0.0582								-0.849	1.33	-1.34	-1.21	-0.715	-0.0182	1.01	-1.44	-1.95	-1.13	-2.06	1.34	-0.519	-0.48
-1.12	0.778	0.917	-0.931	-0.426	0.0454	-0.555								-0.415	0.338	-1.39	-1.46	-1	0.384	1.32	-1.63	-1.61	-0.446	-1.11	1.54	-0.901	-0.98
-1.16	1.02	1.22	-1.35	-0.674	0.367	-0.0956								-0.724	0.729	-1.37	-0.745	-1.1	-0.396	0.877	-0.644	-1.86	-0.266	-0.998	0.519	-0.119	0.0495
-1.23	1.31	0.771	-0.768	-0.785	0.828	0.118								-1.19	0.726	-1.1	-0.459	-1.5	-0.294	0.915	-1.78	-2.02	-0.446	-0.54	0.747	0.0125	-0.196
-1.11	1.71	0.908	-1.08	-0.084	1.01	-0.158								-1.34	0.169	-1.16	-0.313	-1.67	-0.498	0.623	-2.16	-2.04	-0.36	-1.96	1.63	1.05	0.337
-1.13	1.44	0.818	-0.56	1.77	0.427	0.187								-1.19	-0.452	-1.36	-1.06	-1.54	-0.58	-0.134	-1.75	-1.9	-0.0246	-0.7	1.84	2.26	0.74
-1.05	1.44	2.22	-1.18	0.213	0.737	0.474								-0.863	0.367	-1.54	-1.32	-0.716	-0.78	0.74	-0.809	-1.61	1.38	-0.956	1.02	2.75	0.809
-1.17	1.2	0.764	-0.954	-0.29	0.203	0.377								-0.704	0.0853	-1.55	-0.749	-0.0226	-0.672	0.937	-1.04	-2.23	1.28	-1.57	0.31	2.92	0.543
-1.17	1.7	2.15	-0.323	-0.741	0.248	0.329								-0.882	1.82	-1.43	-0.487	0.0481	-0.651	0.808	-0.833	-2.17	-1.33	-1.87	2.13	1.89	-0.815
-1.15	1.54	1.33	0.183	-0.431	-0.302	0.71								-1	3.67	-0.61	-0.0294	-0.189	-0.938	1.01	-0.746	-1.99	-0.198	-2.64	0.725	0.917	-0.125
-1.18	1.79	1.67	-0.82	0.251	-0.638	0.0783								-1.17	2.51	-0.137	0.0867	-0.311	-0.654	0.344	-1.37	-2.21	-1	-0.359	1.44	0.859	-1.54
-1.18	1.67	0.785	-1.17	0.284	-0.605	-0.104								-1.23	2.8	0.231	0.665	-0.713	-0.296	0.936	-1.09	-2.13	-1.59	-0.874	0.608	1.18	-2.55
-1.21	1.58	1.82	-1.62	-0.432	0.578	-0.351								-1.04	2.8	-0.0297	0.577	-0.341	0.379	0.808	-0.823	-2.14	-0.681	-1.05	-0.183	0.934	-1.52
-1.26	1.71	1.44	-1.8	0.827	0.612	-0.0861								-0.929	2.42	-0.0177	-0.324	-0.126	-0.303	0.54	-1.43	-1.4	-0.268	-0.566	0.788	1.42	-1.76
-1.26	1.7	1.01	-1.16	0.281	0.375	-0.165								-1.6	2.34	0.00845	-0.444	-0.0783	-0.724	1.18	-0.382	-1.62	-1.78	-1.96	1.16	1.65	-1.5
-1.32	1.36	0.966	-1.07	-0.175	1.15	-0.51								-1.49	2.95	-0.528	-0.675	-0.198	-0.808	1.74	0.19	-1.64	-1.88	-0.445	1.07	0.645	-1.16
-1.3	1.21	1.29	-1.28	-0.363	0.605	0.14								-1.27	1.94	-0.0348	-0.522	-0.169	-0.766	1.33	-1.82	-1.18	-1.83	-0.217	-0.427	0.85	-1.09
-1.24	1.13	1.76	-0.573	-0.811	0.236	-0.144								-1.52	1.44	0.0653	-0.837	-0.524	0.0242	0.875	-1.89	-1.09	-1.56	-1.33	1.36	1.64	-1.56
-1.33	1.52	1.73	-1.52	1.1	0.517	-0.118								-0.877	1.76	-0.138	-1.24	-0.143	0.104	0.969	-2.07	-1.39	-0.597	-1.64	1.23	0.062	-0.43
-1.33	1.31	2.39	-2.04	-0.727	0.484	-0.127								-0.607	1.26	-0.32	-1.57	-0.555	-0.0482	1.65	-0.371	-1.7	0.152	-1.69	1.44	0.604	-0.465
-1.33	1.44	1.89	-1.28	-0.138	0.537	0.202								-0.44	2.93	-0.431	-1.59	-0.25	-0.278	1.65	-0.765	-1.93	-0.223	-0.689	1.78	1.08	-1.02
-1.33	0.811	1.23	-1.3	0.803	0.107	0.537								-0.533	3.1	-0.782	-1.83	-0.0803	-0.486	1.7	-1.24	-1.9	0.617	-1.27	0.806	0.959	-0.451
-1.29	1.18	1.65	-1.84	0.251	0.663	-0.297								-0.818	1.63	-0.685	-1.85	1.14	-0.909	1.44	-2.21	-2.39	0.634	0.221	0.893	0.226	-0.0962
-1.32	1.5	2.54	-1.64	-1.63	0.512	-0.065								-0.673	1.79	-0.338	-1.84	2.06	-0.503	1.78	-0.872	-1.83	0.264	-2.06	1.11	0.43	-1.23
-1.3	1.76	2.81	-1.48	-0.0721	0.515	0.193								-1.04	2.74	-0.599	-2.27	2.14	0.0551	0.868	-1.35	-2.04	-1.51	-2.13	1.02	0.447	-0.646
-1.28	1.67	1.45	-1.53	0.474	0.393	-0.21								-0.695	1.9	-0.582	-2.14	2.15	-0.394	0.797	-0.37	-2.12	-0.618	-1.97	-0.553	-0.379	-0.769
-1.21	1.37	2.46	-1.32	0.347	0.31	-0.244								-0.405	2.33	-0.869	-1.85	2	0.366	2.7	-0.432	-1.81	-0.872	-1.37	-0.11	0.424	-0.0159
-1.23	1.33	1.38	-1.73	-0.813	0.411	0.0298								-0.294	2.65	-0.762	-2.25	1.74	-0.0434	1.35	-1.55	-2.17	0.36	-1.31	0.642	0.471	0.429
-1.25	1.35	2.1	-1.88	0.217	1.23	-0.399								0.0299	3.45	-0.945	-1.75	1.43	-0.184	1.49	-2.17	-1.66	-0.193	-1.93	1.74	0.485	0.57
-1.25	1.31	0.682	-2.39	0.188	-0.394	0.514								0.464	2.32	-1.01	-1.86	1.72	0.929	0.668	-0.949	-1.37	0.606	0.13	-0.388	0.0251	0.415
-1.24	1.15	0.363	-1.81	0.385	0.331	0.385								0.375	3.27	-1.01	-2.4	1.07	0.387	1.86	-0.703	-1.87	-0.543	-0.951	0.817	0.575	0.164
-1.35	1.44	0.648	-2.03	0.301	-0.517	0.551								0.421	2.01	-0.874	-1.8	0.457	0.791	0.0146	-0.373	-1.19	-0.577	-1.9	1.35	-0.341	0.454
-1.26	1.17	0.512	-1.05	-0.393	0.0752	0.417								0.786	2.94	-0.851	-1.37	0.719	0.00524	0.253	-0.182	-1.24	-1.43	-2.09	0.26	-0.0151	1.42
-1.31	1.22	2.2	-0.733	0.541	0.495	0.244								0.934	2.92	-1.16	-0.782	0.44	0.0212	-0.586	0.0502	-0.583	-1.76	-1.06	0.0768	0.00429	2.25
-1.39	1.28	1.45	-1.31	-0.379	-0.615	0.0908								0.887	3.04	-1.22	-0.865	-0.175	0.309	0.626	-0.15	-1.43	-0.993	-0.708	-0.42	-0.155	1.85
-1.39	1.43	1.28	-1.63	0.409	-0.0425	0.00191								0.491	3.16	-1.28	-0.545	0.514	0.496	0.451	-0.845	-1.07	-1.24	-0.321	1.35	-0.22	2.3
-1.39	1.02	0.118	-1.95	-0.935	1.02	0.187								0.562	2.86	-1.46	-0.613	0.845	0.329	0.806	-0.894	-1.88	-0.141	-1.26	2.44	-0.165	1.32
-1.29	0.984	1.34	-1.64	-0.329	0.498	0.935								1.05	2.48	-1.28	-0.488	1.26	0.391	0.112	-0.111	-2.1	0.443	-0.965	1.43	0.577	1.25
-1.38	1.01	1.06	-2.09	0.541	-0.187	0.193								0.829	2.2	-1.19	-1.07	1.5	0.591	0.863	-0.167	-1.19	-0.565	-1.76	0.656	0.0278	0.482
-1.33	1.5	2.16	-1.99	-0.92	0.96	-0.224								0.503	2.38	-1.23	-0.275	0.828	-0.0731	0.791	0.302	-0.958	-0.113	-1.44	1.46	-0.919	0.485
-1.32	1.33	1.72	-1.88	1.27	1.47	-0.475								0.334	1.67	-1.43	-0.42	0.969	-0.28	0.611	-1.43	-1.29	-0.258	-0.339	0.568	0.0358	1.2
-1.4	1.54	1.9	-1.42	0.786	1.45	-0.0034								0.0495	1.32	-1.41	-0.343	0.982	0.653	1.16	-0.749	-0.987	0.619	-1.38	0.546	-0.22	-0.373
-1.41	1.69	1.35	-1.64	-0.441	2.22	0.353								-0.0925	2.4	-1.42	-0.506	0.935	1.09	1.7	-0.707	-0.985	-1.01	-1.3	0.84	-0.187	-0.502
-1.37	1.5	0.511	-2.12	-0.824	1.09	-1.18								0.113	1.59	-1.47	-0.449	0.944	0.63	0.541	0.927	-1.16	0.125	-1.73	-0.349	-0.417	0.44
-1.41	1.65	1.94	-1.8	-0.391	0.814	0.0928								0.711	0.863	-1.28	-0.581	0.323	0.215	-0.159	0.686	-1.27	-0.45	-1.88	1.53	-0.927	-0.374
-1.57	1.47	2.91	-1.63	-0.0963	0.993	0.0973								0.627	1.01	-1.32	-0.626	0.419	0.625	-0.222	0.0481	-1.54	-0.546	-0.848	0.584	-0.824	0.287
-1.46	1.54	2.09	-2.84	-0.388	0.182	0.0401								0.933	1.83	-1.29	-0.347	0.113	0.0861	0.328	-0.528	-1.4	-1.64	0.356	1.54	-0.777	0.915
-1.38	1.67	1.3	-1.67	0.395	0.434	-0.422								1.07	1.59	-1.23	-0.887	-0.263	0.245	0.402	0.683	-1.14	-2.14	-0.638	1.79	-0.537	0.872
-1.39	1.71	1.89	-1.04	0.708	0.0408	-1.02								1.63	0.838	-1.21	-1.26	-0.0691	-0.293	-0.293	0.0488	-1.08	0.195	-1.24	-1.19	-0.46	0.947
-1.38	1.69	1.61	-1.08	-1.16	0.338	-1.29								1.18	0.97	-1.42	-1.35	-0.15	-0.91	0.0331	-0.223	-1.34	-1.52	-1.17	1.06	-0.622	-0.164
-1.4	1.85	0.758	-1.46	-0.201	0.626	0.0142								0.795	1.09	-1.38	-1.46	0.0831	-0.617	-0.168	0.0622	-1.45	-1.62	-1.29	0.529	-0.647	-0.149
-1.38	2.04	1.23	-1.51	-0.0555	0.737	-0.586								0.309	0.512	-1.23	-1.38	0.123	-1.04	0.916	0.414	-1.2	-1.17	-0.734	0.182	-0.73	-0.206
-1.44	1.96	1.65	-2.17	-0.988	1.1	-0.318								0.187	0.873	-1.54	-1.04	-0.0747	0.154	-0.549	0.901	-1.26	-1.44	-1.19	0.847	-1.7	-1.84
-1.31	2.21	1.5	-1.48	-0.595	0.464	-0.652								0.117	0.997	-1.41	-0.87	-0.0962	-0.487	0.0129	0.323	-1.35	-1.06	0.0683	1.97	-1.37	-1.42
-1.42	2.05	1.84	-1.78	0.00416	0.178	0.09								-0.0959	0.904	-1.14	-0.942	-0.208	-0.372	0.654	0.316	-1.68	-1.41	-0.36	1.27	-1.74	0.528
-1.48	1.97	1.4	-1.33	-0.991	0.958	-0.545								-0.268	1.04	-1.04	-0.888	-0.306	-1.12	0.472	0.422	-1.7	-0.912	0.959	0.566	-0.882	0.694
-1.48	2.31	1.68	-0.835	0.342	0.0559	-0.0771								-0.665	1.07	-1.18	-0.904	-0.374	-0.198	0.344	1.28	-1.46	-0.546	-0.625	-1.17	-0.948	0.38
-1.43	2.11	0.73	-1.37	0.232	0.594	0.309								-0.356	0.395	-1.09	-1.1	-0.217	0.31	0.414	1.21	-1.37	-0.573	-1.14	0.0163	-1.42	-0.218
-1.4	2.34	3.52	-1.06	-0.471	0.933	-0.578								0.367	-0.00509	-1.07	-0.924	0.487	0.455	-0.268	0.283	-1.69	-1.1	-1.41	-0.248	-0.829	1.05
-1.47	1.4	1.72	-0.827	-0.172	0.636	-0.516								0.502	0.104	-1.23	-0.352	0.571	1.24	0.609	-0.5	-0.878	-2.03	-0.179	-0.08	-0.645	-0.0902
-1.38	1.63	1.76	-0.804	-1.39	0.138	-0.86								0.434	0.114	-1.13	-0.392	0.314	1.65	0.0202	0.668	-0.939	-1.46	-1.11	0.779	-1.16	0.282
-1.5	1.68	2.73	-0.966	0.0743	0.744	-1.24								-0.299	0.758	-1.06	0.392	0.564	1.18	0.13	0.552	-1.13	-1.43	0.146	-0.908	-1.14	1.28
-1.52	1.75	1.05	-1.81	-0.118	0.678	-1.33								-0.779	0.293	-1.09	0.437	0.429	0.599	-0.643	0.186	-1.08	-0.892	-0.282	0.867	-1.01	1.08
-1.49	1.7	1.03	-0.835	0.786	0.362	-0.944								-0.511	-0.0287	-1.29	0.931	0.393	0.906	-0.157	-0.78	-1.15	-1.41	-1.35	0.677	-1.47	0.946
-1.41	1.82	2.91	-0.751	0.172	0.921	-1.37								-0.521	-0.305	-1.18	1.28	0.561	1.21	-0.474	0.115	-0.534	-0.283	-2.42	0.752	-1.42	0.71
-1.42	1.84	0.148	-1.11	0.034	0.838	-1.16								0.145	0.284	-1.17	1.01	0.876	0.613	0.105	-0.377	-0.465	-0.0718	-0.995	-0.698	-1.04	0.187
-1.42	1.7	0.35	-0.699	1.26	0.908	-1.19								0.35	-0.304	-1.27	0.362	1	0.928	0.391	0.73	-1.45	-0.968	-0.856	0.554	-1.38	-0.221
-1.51	1.64	0.0561	-0.0664	0.109	1.36	-1.11								0.742	-0.409	-1.28	0.072	0.743	0.228	0.661	0.484	-1.32	-0.888	-0.359	2.08	-1.66	-0.0987
-1.44	1.14	-0.139	-0.295	-0.422	1.21	-1.8								0.217	0.0759	-1.2	-0.644	0.398	0.484	-0.275	1.34	-1.2	-0.936	-0.887	1.08	-0.657	0.0499
-1.48	1.21	-0.779	-0.162	0.535	0.709	-1.47								0.949	0.0247	-1.25	-0.134	-0.204	-0.437	-0.0749	-0.602	-1.34	-0.866	1.29	0.205	-1.04	0.0575
-1.43	1.24	-1.15	-0.745	0.54	0.46	-1.2								0.894	0.715	-1.38	0.466	-0.162	0.169	0.296	0.116	-1.26	-0.893	1.16	1.05	-0.704	0.488
-1.52	1.3	0.285	-0.46	-0.145	0.154	-0.956								1.03	0.221	-1.1	0.0837	0.223	0.021	-0.0605	1.25	-1.65	-0.429	0.567	1.09	-0.938	-0.0401
-1.52	1.34	-1.13	-0.606	0.53	0.113	-1.3								0.791	0.14	-1.25	0.0929	0.251	-0.044	-0.777	1.5	-1.52	0.58	-0.712	0.447	-0.0403	-0.238
-1.6	1.39	-1.25	-0.535	1.07	-0.221	-0.863								0.797	0.68	-1.52	0.332	-0.167	0.296	-1.51	0.208	-1.07	-0.179	-1.46	0.301	-0.541	-0.0186
-1.53	0.88	-1.93	-1.2	-0.0347	0.287	-0.914								0.739	1.73	-1.19	0.421	0.153	0.638	-0.147	0.166	-0.69	-0.172	-1.7	-0.392	-1.6	0.404
-1.53	0.761	-0.07	-0.765	0.28	0.57	-1.14								0.335	1.08	-1.06	0.829	0.0958	0.0259	-1.11	0.742	-1.06	-0.904	-0.148	-1.43	-2.22	0.388
-1.53	1.25	-0.168	-1.21	-1.13	0.0845	-0.985								0.486	0.973	-1.02	0.63	0.522	-0.14	-0.557	-0.661	-1.05	0.165	0.25	-1.96	-1.61	-0.114
-1.56	1.28	-0.55	-0.939	-1.72	-0.226	-1.25								0.385	1.53	-0.976	0.738	0.734	0.228	-1.01	-0.209	-1.2	0.861	0.678	0.299	-0.308	-0.931
-1.5	0.909	-1.29	-0.798	1.87	-0.363	-1.25								0.12	1.29	-1.21	-0.111	0.732	0.735	-0.0119	1.04	-2.02	1.25	-0.96	-0.451	-1.37	-0.966
-1.59	0.775	-1.44	-1.05	0.903	0.25	-0.77								0.0897	0.387	-1.31	0.408	0.877	0.459	0.24	0.482	-1.33	1.53	-0.97	-0.351	-1.26	-2.13
-1.63	0.415	-0.845	-0.367	-0.135	-0.279	-1.24								-0.297	0.322	-1.14	0.215	0.404	-0.454	0.0938	-0.373	-1.65	1.26	-2.59	-0.942	-1.45	-1.98
-1.65	-0.224	-2.21	-0.0197	0.556	-0.157	-0.698								-0.195	0.881	-1.34	0.222	0.5	-0.705	-0.0968	-0.461	-0.653	1.34	-0.832	0.938	-1.74	-0.539
-1.56	-0.412	-1.36	0.0677	0.0514	0.192	-0.88								-0.206	0.874	-1.31	0.377	0.0495	-0.708	-0.601	0.451	-2.01	0.553	-0.132	0.319	-0.788	-0.609
-1.5	-0.502	-0.899	0.256	-0.0321	0.104	-0.445								-0.23	1.21	-1.46	0.206	0.0505	-0.558	-1.19	0.0916	-1.53	0.0195	1.33	0.453	-0.355	-1.35
-1.41	-0.58	-0.844	-0.245	-0.237	1.25	-0.219								-0.164	1.39	-1.33	1.04	0.765	0.152	0.0653	0.635	-1.89	0.512	-0.0677	-0.41	-0.0505	-1.69
-1.49	-0.552	-0.959	0.626	-0.478	0.487	-1								-0.27	0.424	-1.1	0.42	0.545	0.261	-0.707	-0.49	-1.65	0.108	-1.61	0.154	0.548	-1.47
-1.42	-0.782	-1.49	-0.346	-1.1	0.446	-1.07								-0.293	0.404	-0.996	0.0246	-0.424	0.0591	-0.768	1.02	-2.15	0.386	-0.596	-0.766	-0.268	-2.32
-1.48	-0.619	-1.84	0.497	0.861	0.848	-0.788								-0.256	-0.201	-0.933	-0.38	-0.587	-0.0923	-0.0703	1.19	-2.79	0.652	-1.31	-0.408	-0.299	-0.98
-1.44	-0.885	-1.43	0.00664	-0.11	0.8	-0.491								-0.13	0.63	-1.03	-0.634	-0.196	0.0511	0.0897	1.32	-2.21	0.393	-1.35	1.1	0.233	0.195
-1.38	-0.849	-1.25	0.616	0.489	0.232	-1.02								-0.0271	0.43	-1.2	-0.189	0.0391	-0.199	-0.68	-0.117	-1.74	-0.02	-1.66	0.257	-0.583	0.856
-1.34	-0.737	-1.44	1.25	1.02	0.946	-0.752								-0.214	0.856	-1.43	-0.59	-0.454	0.122	-0.283	0.359	-2.23	1.12	-0.431	0.646	-0.904	0.77
-1.43	-0.595	-1.13	0.409	0.315	0.529	-0.293								-0.686	0.907	-1.45	-0.728	-0.0371	0.542	-0.509	0.552	-2.43	1.84	-0.677	0.102	-0.397	0.272
-1.46	-0.215	-0.17	0.983	-0.734	0.661	-0.379								-0.649	0.3	-1.47	-1.15	0.199	0.0877	-0.573	1.26	-2.55	1.74	-0.262	-0.513	-0.703	0.993
-1.44	-0.682	-0.366	0.612	0.177	0.722	-0.587								-0.649	0.262	-1.61	-0.865	-0.215	-0.12	0.199	1.73	-2.47	0.382	-0.554	-0.273	-0.503	0.285
-1.46	-1.07	-0.934	0.806	0.425	0.109	-0.466								-0.533	-0.766	-1.95	-0.833	-0.123	0.388	-0.715	1.16	-2.57	0.249	0.0418	0.42	-0.596	0.749
-1.58	-0.796	-1.81	0.813	0.464	1.41	0.488								-0.154	0.0777	-1.92	-1.48	-0.0258	-0.0948	-0.441	1.82	-2.6	-0.0471	0.238	-0.487	-1.14	0.362
-1.5	-0.447	-1.98	0.337	-0.593	0.456	-0.0848								0.0511	-0.25	-1.92	-1.63	-0.186	-0.356	-0.975	1.52	-2.41	0.706	-0.757	-1.09	-0.757	0.635
-1.45	-0.736	-1.93	1.17	0.236	0.623	-0.415								1.09	-0.287	-2.11	-1.84	-0.405	0.0188	-0.236	1.56	-2.11	1.37	-0.797	0.263	-1.47	0.33
-1.46	-0.956	-1.41	1.59	-0.859	0.283	-0.581								1.19	-0.583	-1.99	-1.81	-1.01	-0.161	0.461	0.47	-2.2	0.479	-0.647	-0.466	-1.33	0.245
-1.6	-0.786	-1.95	0.731	0.194	0.289	-0.736								1.7	0.11	-2.04	-1.92	-0.809	-0.0315	0.404	1.75	-1.87	1.14	-0.984	-0.0623	-1.51	-0.766
-1.54	-0.851	-1.32	0.432	-0.175	0.412	-0.174								1.95	-0.416	-1.94	-2.11	-1.33	-0.317	0.537	1.92	-1.56	1.69	-0.257	1.56	-0.167	-1.79
-1.57	-0.602	-1.34	1.22	-0.676	-0.178	-0.545								1.98	-0.492	-1.99	-1.72	-1.25	-0.247	0.643	2.02	-2.18	1.35	-0.946	-0.00969	-0.993	-3.07
-1.57	0.117	-1.9	1.35	-0.0253	-0.819	-0.627								1.71	0.142	-1.71	-1.78	-1.38	-0.681	0.611	2.43	-2.37	1.41	-0.189	-0.481	-0.553	-2.36
-1.59	-0.229	-1.52	1.26	-0.541	-0.033	-0.829								1.38	0.316	-2.07	-1.83	-0.596	-1.31	1.21	2.42	-2.1	1.77	-0.365	-0.949	-0.998	-1.3
-1.56	-0.261	-1.04	2.03	0.18	0.54	-0.119								1.91	0.15	-2.12	-1.77	-0.392	-0.0695	0.854	1.23	-2.35	3.53	-0.407	-0.132	-1.29	-1.09
-1.5	-0.295	-1.9	1.62	0.00275	0.278	-0.14								1.74	0.0277	-2.13	-1.69	-0.366	-0.829	0.415	0.894	-2.44	2.79	-0.754	-0.282	-1.98	-1.73
-1.53	-0.561	0.0527	0.473	-0.528	0.203	-0.641								1.56	0.0293	-1.69	-2.06	-0.487	-0.299	0.312	1.32	-2.46	1.63	-0.266	-0.366	-0.435	-1.6
-1.63	-0.409	-1.05	0.638	0.829	0.183	-0.169								1.74	-0.0301	-1.32	-2.38	-1.13	-0.684	0.28	1.31	-1.76	1.82	-0.555	0.162	0.472	-2.14
-1.54	-0.345	-0.332	0.591	-0.645	0.0663	-0.24								1.87	0.139	-1.4	-2.11	-1.07	-0.333	-0.172	0.256	-1.27	1.18	-0.417	-0.577	1.17	-1.46
-1.51	-0.441	-1.91	1.95	0.608	0.142	-0.649								1.93	-0.29	-1.29	-2.21	-0.739	0.0492	-0.211	1.38	-1.37	2.77	-1.17	-0.219	1.21	-2.62
-1.57	-0.256	-0.506	1.89	0.667	-0.187	-0.192								2.13	-0.218	-1.53	-2.18	-0.82	0.655	0.0692	0.414	-2.26	1.86	-2.14	-1.48	1.33	-2.41
-1.59	-0.477	-0.134	2.38	0.629	-0.0305	0.156								2.25	-0.00871	-1.53	-2.62	-1.12	0.518	0.199	2.01	-2.04	1.14	-1.6	-0.182	1.67	-3.56
-1.57	-0.424	-1.32	2.11	0.605	-0.356	-0.215								1.89	0.823	-1.41	-2.18	-1	0.574	-0.0143	0.0844	-2.17	1.63	-1.2	0.567	1.43	-3.06
-1.63	0.36	-1.06	2	0.547	0.319	-1.11								1.62	0.72	-1.52	-2.12	-1.42	0.345	-0.562	0.368	-2.06	1.82	-0.605	-1.04	0.793	-2.96
-1.5	-0.203	-1.59	2.23	-0.113	-0.175	-0.697								1.45	0.00415	-1.81	-2.23	-1.12	0.127	0.469	0.827	-1.95	0.939	0.168	-1.48	1.43	-1.98
-1.48	0.137	-0.874	1.75	-0.168	0.0275	-1.25								1.43	0.737	-2.01	-2.59	-1.3	-0.835	0.65	1.65	-2.31	2.12	-0.724	0.761	1.22	-1.56
-1.56	-0.155	-0.986	1.58	-0.0224	0.131	-0.192								1.45	0.196	-1.72	-2.4	-1.04	-0.0804	-0.0299	2.04	-2.24	2.03	-2.96	0.413	1.72	-2.37
-1.52	0.0529	-1.57	2.26	-0.975	0.67	-0.235								1.63	0.131	-1.68	-2.09	-0.992	-0.945	-0.101	0.812	-2.46	2.25	-1.2	-0.864	0.577	-1.8
-1.62	-0.152	-2.39	1.55	0.286	0.527	-0.694								1.74	-0.208	-1.73	-2.23	-0.988	-1.23	-1.11	0.635	-2.63	2.53	-0.892	0.217	0.92	-1.91
-1.44	0.175	-1.57	1.54	-0.506	-0.701	0.202								2.26	-0.302	-1.78	-2.28	-1.25	-0.95	-0.645	1.97	-2.65	2.41	-0.596	1.21	0.728	-0.928
-1.48	0.0758	-1.91	1.09	-1.85	-0.616	-0.214								1.6	-0.42	-1.87	-2.2	-1.03	-1.26	0.22	1.52	-2.04	2.25	-0.809	-1.15	0.729	-1.67
-1.47	0.0471	-0.745	0.782	-0.577	-0.753	-0.368								2.04	-0.584	-1.83	-2.84	-0.863	-0.193	0.333	-0.0673	-2.36	1.31	-1.89	-0.117	0.918	-1.94
-1.45	0.213	-0.361	0.19	-0.34	-1.19	-0.236								1.57	-0.261	-1.91	-2.53	-0.93	0.0936	-0.979	0.212	-2.45	1.47	-0.145	-1.1	0.361	-2.01
-1.44	-0.272	-1.81	0.05	-0.274	-0.869	0.111								1.25	-0.673	-1.61	-2.31	-1.48	-0.811	-0.56	0.188	-1.95	2.44	-0.423	-1.38	0.456	-1.28
-1.47	-0.391	-1.84	1.92	-0.827	-1.19	-0.544								0.923	-0.00379	-1.74	-2.46	-1.58	-0.882	-0.398	1.3	-2.12	1.86	-0.107	-1.27	-0.367	-1.95
-1.38	-0.428	-1.64	1.02	-0.714	-0.726	-0.39								0.899	-0.862	-1.75	-2.45	-1.55	0.63	0.274	0.693	-1.7	2.29	1.38	1.07	0.171	-2.69
-1.37	0.00212	-1.93	0.553	-0.754	0.221	-0.533								0.841	-0.561	-1.69	-2.18	-1.86	0.638	-0.632	0.433	-2.42	2.44	0.385	0.414	0.511	-3.66
-1.51	0.0808	-0.115	0.435	-0.0824	-0.0871	-0.375								0.841	-0.202	-1.84	-2.04	-1.46	0.362	0.252	0.000949	-2	2.15	0.0491	-0.382	1.13	-3.71
-1.47	-0.323	-1.7	0.458	-0.539	-0.0891	-0.697								1.02	0.371	-1.57	-2.17	-1.85	0.328	0.107	0.837	-2.03	1.62	0.59	-0.69	1.17	-3.28
-1.43	0.0662	-1.3	0.443	-0.195	-0.236	-1.27								0.881	-0.748	-1.8	-1.89	-2.04	0.242	-0.223	-0.193	-1.25	0.728	1.13	-1.38	0.255	-2.95
-1.35	-0.358	-2.29	0.505	0.383	0.107	-1.15								0.855	-0.0182	-1.76	-1.57	-1.9	-0.124	-0.475	0.038	-1.43	0.564	-0.258	-1.6	-0.0992	-2.05
-1.38	-0.505	0.329	0.896	-0.245	-0.437	-1.59								1.25	0.23	-1.86	-1.34	-1.97	0.379	-0.0302	-0.751	-0.907	0.314	0.0557	-0.321	0.123	-2.07
-1.42	-0.711	-0.459	0.47	-1.08	-0.299	-2.12								0.922	-0.0847	-1.62	-1.87	-2.15	-0.323	0.47	0.154	-1.36	1.17	-0.796	0.315	-0.263	-2.6
-1.4	-0.553	-0.202	0.7	-0.309	-0.506	-1.98								1.36	0.686	-1.71	-2.11	-2.62	0.295	0.365	0.261	-1.68	1.36	-0.89	0.814	0.06	-1.35
-1.35	-1.37	-1.41	0.372	0.161	-0.948	-1.43								1.34	0.664	-1.88	-2	-2.97	-1.12	0.902	0.712	-1.77	2.31	-0.684	0.838	0.53	-1.73
-1.26	-1.01	-2.23	-0.104	1.61	-0.257	-1.88								1.24	-0.607	-1.87	-1.93	-2.26	-0.314	0.55	-0.695	-2.13	1.59	0.416	0.339	0.0421	-3.66
-1.31	-0.751	-1.1	0.249	-0.634	-0.391	-1.14								1.32	-0.881	-1.9	-2.55	-2.38	-0.374	0.111	1.08	-2.23	1.19	-0.0384	0.907	-0.234	-3.71
-1.27	-1.21	-0.489	0.243	-0.638	0.00445	-2.24								0.93	-0.00363	-1.82	-2.77	-2.18	-0.21	-0.416	0.465	-2.39	2.51	-0.745	-0.626	0.232	-2.11
-1.28	-1.11	-1.13	0.547	-1.41	-0.82	-1.39								0.761	1.77	-1.94	-2.47	-2.17	-0.24	0.0457	0.314	-2.69	3.31	-0.609	0.52	0.221	-2.16
-1.36	-1.08	-0.35	0.163	-0.0968	-0.442	-2.16								0.363	2.53	-1.45	-2.31	-2.64	0.0119	-0.34	-0.907	-2.48	1.67	-0.135	-0.0821	-0.401	-2.19
-1.39	-0.999	-0.806	0.128	-1.66	-0.574	-1								0.817	1.78	-1.66	-2.79	-2.81	0.295	0.066	0.358	-2.09	2.13	-0.259	2.32	-0.49	-1.81
-1.41	-0.855	-0.619	0.878	-0.534	0.611	-1.63								0.359	0.757	-1.24	-2.03	-2.39	0.229	-1.18	-0.68	-2.86	1.5	0.958	1.15	-0.565	-1.96
-1.45	-0.831	-0.574	0.251	0.265	0.159	-1.39								0.142	0.14	-1.11	-2.12	-2.84	0.499	0.372	-1.59	-2.66	1.89	0.23	-0.302	-0.676	-1.02
-1.36	-1.24	-0.515	0.419	-0.326	-0.377	-2.43								-0.0435	1.72	-1.17	-2.43	-3.19	0.946	0.404	0.619	-2.7	2.35	0.23	-1.8	-0.626	-0.7
-1.37	-1.08	0.235	-0.303	0.0997	-0.585	-1.68								-0.211	-0.202	-1.11	-2.65	-2.86	0.763	-0.226	0.143	-2.45	2.22	-1.25	-1.29	-0.448	-1.25
-1.35	-0.918	-0.971	-0.0825	0.136	-0.421	-1.7								-0.268	1.03	-1.49	-2.21	-2.01	0.588	-0.865	-0.529	-1.51	2.46	-1.82	1.39	-0.681	-0.197
-1.37	-0.679	-0.243	0.801	-0.426	-0.76	-1.93								-0.499	0.755	-1.61	-2.54	-2.34	-0.0249	-0.409	-0.551	-1.64	1.6	-0.752	1.02	-1.48	-0.734
-1.48	-0.676	-0.995	0.431	0.204	-0.596	-1.73								-0.247	0.245	-1.53	-2.85	-2.07	0.66	-0.122	-1.38	-1.47	1.51	0.151	1.32	-0.887	0.00459
-1.44	-0.192	1.27	0.803	-0.00714	-1.44	-1.7								-0.244	-0.38	-1.58	-2.81	-2.38	0.378	0.00865	0.794	-1.73	1.67	0.331	-1.43	-0.758	-1.02
-1.45	-0.306	1.24	1.35	-0.718	-1.05	-1.85								-0.546	-1.2	-1.69	-2.29	-2.74	0.0706	0.047	-0.872	-2.29	2.65	0.643	-1.21	-1.08	-2.27
-1.41	-0.642	-0.235	0.597	0.16	-1.09	-1.96								-0.726	0.618	-1.59	-2.77	-2.66	0.111	-1.26	-1.11	-2.8	2.51	-0.191	-0.936	-1.72	-3.12
-1.4	-0.424	0.0823	0.0966	0.224	-0.493	-2.29								-0.939	-0.566	-1.56	-2.73	-3.33	-0.405	-1.16	-0.51	-3.25	3.37	-0.45	-0.766	-1.3	-3.35
-1.46	-0.111	1.84	-0.182	-0.0441	-1.21	-1.88								-0.515	-0.55	-1.64	-3.03	-2.97	-0.75	-0.397	-1.22	-3.51	1.95	-1.79	0.279	-1.27	-3.32
-1.4	-0.193	2.21	-0.567	0.848	-1.64	-2.05								-0.554	-0.676	-1.94	-2.95	-3.23	-1.15	-0.659	-0.463	-2.98	1.24	-0.677	-0.857	-1.2	-4.49
-1.48	-0.243	3.6	-0.213	0.28	-2.48	-2.11								-0.325	0.11	-1.82	-2.49	-2.56	-1.25	-1.24	0.00624	-1.58	0.437	-0.732	-0.9	-1.1	-3.6
-1.32	-0.196	4.22	-0.629	-0.211	-1.92	-2.34								-0.529	-0.376	-1.98	-2.66	-2.33	-1.91	0.0628	-0.02	-0.939	1.63	0.232	0.0989	-1	-3.6
-1.26	0.0815	2.94	-0.496	0.623	-1.66	-1.38								-0.589	0.325	-1.98	-2.17	-2.93	-1.31	-0.0508	0.929	-1.6	1.24	1.14	-0.136	-1.11	-2.85
-1.31	0.321	2.41	-0.201	0.183	-1.83	-0.4								-0.525	-0.333	-2.05	-2.59	-2.75	-0.929	-1.03	1.04	-2.1	2.15	0.465	-0.82	-1.68	-3.74
-1.3	0.431	3.52	-0.105	-0.806	-1.18	-1.16								-0.432	-0.149	-2.22	-2.59	-3	-0.84	-1.82	-0.414	-2.69	2.39	-1.18	-1.16	-1.95	-4.01
-1.31	0.34	3.75	-0.459	-0.179	-1.29	-1.31								-0.451	-0.169	-2.21	-3.56	-2.84	-1.97	-1.51	-1.8	-2.68	1.99	-1.78	-1.22	-1.43	-3.54
-1.4	0.481	3.51	0.17	-1.75	-1.32	-0.606								-0.432	-0.533	-2.32	-2.73	-2.72	-1.94	-1.92	-0.58	-2.29	0.78	-0.371	0.853	-1.6	-3.36
-1.36	0.443	1.96	-0.225	-0.759	-1.81	0.0301								-0.478	-0.318	-2.34	-3.08	-3.09	-1.48	-2	-0.309	-1.55	0.51	-0.18	0.327	-1.67	-3.07
-1.39	0.385	2.99	-0.186	1.22	-1.92	-0.00851								-0.573	-0.754	-2.34	-2.52	-2.86	-1.07	-3.07	-0.769	-1.88	1.01	0.509	0.74	-2	-3.54
-1.3	0.523	3.1	-0.742	0.733	-1.64	0.351								-0.515	-0.738	-2.69	-2.62	-3.28	-0.286	-2.5	-1.1	-1.72	1.25	-0.374	1.4	-2.36	-3.32
-1.36	0.472	5	-0.73	0.108	-1.26	0.594								-0.534	-0.53	-3.17	-2.76	-2.92	-0.727	-1.75	-1.38	-1.36	1.27	1.67	0.409	-1.85	-2.72
-1.39	0.452	3.01	-0.862	0.523	-1.44	0.528								-0.381	-1.02	-3.09	-2.92	-2.52	-0.811	-1.68	-2.13	-1.43	1.29	0.949	0.426	-2.08	-3.81
-1.35	0.352	2.5	-0.851	-0.425	-0.99	0.556								-0.496	-1.11	-3.14	-2.81	-2.68	-1.3	-2.48	-1.66	-2.19	1.92	-0.7	-0.266	-2.13	-3.7
-1.25	0.467	3.95	-0.214	-0.0629	-2.15	0.327								-0.658	-0.823	-3.12	-2.46	-2.07	-0.784	-2.55	-2.71	-1.89	1.78	-1.11	-0.0518	-2.54	-2.21
-1.2	0.159	2.84	0.0251	-0.000964	-2.11	0.499								-1.07	-0.992	-2.95	-2.3	-2.57	-0.877	-2.47	-0.863	-2	2.31	-0.794	-0.588	-2.05	-1.23
-1.28	0.28	3.04	-0.539	-0.4	-1.81	0.32								-1.09	-0.615	-2.55	-2.89	-2.68	-0.771	-1.91	-0.845	-2.15	0.973	-0.605	-0.732	-2.34	-1.34
-1.3	0.285	2.98	-0.125	0.629	-1.5	0.695								-1.64	-0.707	-2.64	-2.23	-2.56	-0.608	-3.79	0.276	-1.79	1.62	-0.843	-0.493	-2	-1.4
-1.22	0.799	2.65	-0.179	-0.439	-1.74	0.858								-0.916	-0.586	-2.68	-2.34	-2.83	-0.0471	-2.39	0.317	-1.89	1.63	-1.08	-0.928	-1.15	-0.642
-1.3	0.696	2.62	-0.401	0.172	-2.29	0.666								-0.611	-0.683	-2.59	-2.46	-3.15	-0.774	-2.71	-0.0364	-2.45	1.23	-0.318	-0.686	-1.98	-0.506
-1.29	0.475	1.24	-0.974	0.976	-1.63	0.791								-0.712	-1.27	-2.46	-2.75	-2.79	-1	-3.2	0.0114	-1.99	1.91	-0.424	-1.94	-3.02	-0.99
-1.27	0.531	2.23	-0.0889	0.118	-1.89	1.02								-0.687	-1.01	-2.62	-3.41	-2.12	-1.16	-2.9	0.472	-2.16	1.71	0.616	-1.66	-1.93	-1.98
-1.3	0.195	1.15	-0.492	0.819	-0.837	0.939								-0.794	-1.81	-2.65	-2.63	-2.49	-1.78	-2.3	-0.0824	-2.41	1.14	0.289	-0.19	-2.04	-2.8
-1.25	0.276	0.935	-0.88	-0.266	-1.85	1.83								-1.29	-0.902	-2.43	-2.76	-1.99	-2.16	-2.84	-0.0267	-3.41	0.867	0.255	0.434	-1.62	-2.51
-1.25	0.634	0.388	-1.02	-1.14	-1.45	1.73								-1.19	-0.932	-2.6	-3.18	-1.71	-2.62	-2.17	-1.4	-3.13	0.34	-0.667	0.732	-2.33	-2.46
-1.26	0.916	1.04	-1.18	-0.285	-1.68	1.4								-0.808	-0.828	-2.57	-2.91	-1.85	-2.53	-3.38	-1.42	-3.1	0.432	-0.273	0.0531	-2.03	-3.36
-1.25	0.899	1.2	-0.816	-0.598	-1.51	1.49								-0.787	-0.957	-2.67	-3.22	-1.88	-2.54	-2.37	-0.796	-3.42	0.0176	-1.02	-0.661	-2.26	-3.22
-1.31	1.04	1.5	-0.582	-0.361	-2.37	1.52								-0.794	-0.88	-2.77	-3.53	-2.63	-2.81	-3.04	-0.425	-3.05	0.735	-0.698	0.313	-2.41	-2.72
-1.36	0.732	2.64	-0.737	0.808	-2.47	1.35								-0.774	-0.607	-3.04	-3.5	-2.75	-3.46	-3.06	-0.778	-2.93	1.54	-0.0445	-0.169	-2.53	-2.19
-1.45	0.998	1.11	-1.15	0.499	-2.8	1.99								-1.04	-0.509	-3.01	-3.54	-3.09	-3.5	-2.88	-1.22	-2.48	2	0.493	-0.359	-2.37	-2.17
-1.42	0.739	0.413	-0.419	-0.393	-2.33	1.74								-1.24	-0.921	-2.94	-3.47	-2.8	-3.8	-3.83	-1.85	-3.06	1.76	-0.298	-0.798	-2.72	-3.49
-1.41	0.366	1.45	-0.579	0.929	-2.48	1.54								-0.589	-0.422	-2.92	-3.39	-2.88	-3.37	-4.09	-1.15	-3.24	1.6	-0.655	-0.488	-2.86	-4.55
-1.3	0.554	0.869	-1.07	0.0428	-2.6	1.48								-0.974	-1.49	-2.69	-2.77	-3.68	-3.28	-3.86	-1.34	-2.93	0.575	-0.989	-1.36	-2.95	-4.58
-1.28	-0.052	1.09	-0.955	0.633	-2.4	0.929								-0.846	-2.02	-2.93	-3.38	-3.27	-3.53	-4.34	-1.69	-2.75	0.88	-0.824	-1.49	-2.69	-4.61
-1.35	0.0175	0.407	-0.542	1.89	-2.57	1.2								-1.11	-0.88	-3.08	-3.65	-3.4	-3.33	-3.67	-2.5	-3.26	0.479	-0.874	-1.08	-2.36	-5.21
-1.32	-0.00258	0.499	-0.117	1.21	-2.29	1.94								-1.01	-0.537	-2.89	-3.26	-3.57	-3.22	-3.93	-3.42	-3.46	0.853	-0.193	-1.04	-2.28	-3.6
-1.27	-0.0364	1.13	-0.842	1.81	-2.52	1.82								-0.892	0.289	-2.91	-3.11	-3.38	-3.75	-3.32	-2.74	-3.25	-0.225	-0.86	-0.495	-2.16	-4.18
-1.32	-0.0261	1.97	-0.716	1.39	-2.75	1.58								-1.17	1.14	-2.72	-3.6	-3.53	-3.88	-4.03	-1.77	-3.39	-0.546	0.343	-1.59	-2.97	-4.74
-1.37	0.103	2.37	-0.272	0.676	-2.73	1.96								-0.955	1.39	-2.64	-3.17	-3.45	-3.92	-3.66	-1.24	-3.36	-0.0945	-0.393	0.911	-3.24	-3.89
-1.36	0.329	0.05	-0.228	1.44	-2.13	2.04								-1.08	0.349	-2.23	-3.41	-3.6	-3.93	-4.33	-2.67	-3.3	-0.68	-1.34	-0.0398	-2.58	-4.59
-1.43	0.0224	1.47	0.11	-0.258	-2.76	1.49								-0.948	0.614	-2.27	-2.74	-3.93	-3.4	-5.03	-2.37	-3.06	-1.56	-1.08	-1.04	-2.78	-4.01
-1.42	0.163	0.723	0.15	0.0667	-2.19	1.58								-0.779	0.0568	-2.22	-2.78	-3.7	-4.31	-3.6	-2.51	-3.17	-1.4	-0.256	-1.1	-3.02	-4.29
-1.58	0.162	0.617	0.512	-0.756	-2.84	1.92								-0.695	-0.112	-2.46	-2.68	-4.27	-3.96	-4.13	-2.05	-3.08	-2.35	-0.674	-0.312	-3.75	-5.2
-1.46	0.119	1.34	0.0926	0.331	-2.61	1.88								-0.736	0.388	-2.6	-3.09	-4.42	-3.73	-4.39	-1.47	-3.23	-2.48	-1.22	0.0778	-3.23	-3.88
-1.37	0.0513	0.251	-0.159	0.199	-2.62	1.69								-0.843	0.0593	-2.69	-3.36	-4.36	-4.03	-4.04	-2.34	-3.6	-2.88	-0.579	0.255	-3.49	-3.82
-1.27	0.347	1.07	0.188	0.593	-2.18	1.46								-0.724	-0.292	-2.65	-3.02	-4.34	-4.2	-4.4	-1.62	-3.52	-1.77	-1.42	-0.764	-2.81	-3.93
-1.3	0.791	-0.00021	0.31	0.259	-2.47	1.13								-0.353	-0.967	-2.64	-2.96	-4.19	-4.09	-4.15	-0.724	-3.02	-2.94	-0.375	-0.313	-3.35	-3.79
-1.38	0.402	1.03	-0.304	0.401	-2.88	2.05								-0.0524	-1.1	-2.59	-3.22	-4.72	-4.43	-5.09	-2.23	-3.53	-2.29	-0.514	0.61	-2.95	-4.6
-1.41	0.367	-0.342	-0.0767	1.56	-2.32	0.762								-0.186	-0.654	-2.71	-3.71	-4.39	-3.73	-4.57	-2.3	-3.23	-2.34	-1.58	1.44	-3.4	-4.65
-1.53	0.608	1.23	0.0707	2.3	-2.62	0.289								0.00676	-0.0987	-2.67	-3.25	-4.39	-4.13	-4.89	-2.58	-2.95	-2.22	-0.925	-1.01	-2.99	-5.06
-1.4	0.446	0.781	-0.206	1.08	-2.47	1.32								-0.321	0.135	-2.87	-3.04	-4.1	-4.28	-4.31	-3	-3.24	-2.9	-0.764	0.0238	-3.27	-5.86
-1.41	0.352	-0.408	-0.123	1.57	-2.56	0.769								-0.424	-0.171	-2.91	-3.01	-4.32	-4.04	-4.78	-1.27	-3.44	-1.46	-1.11	-0.307	-2.56	-5.23
-1.35	0.417	0.281	0.0756	3.14	-2.14	0.287								-0.251	0.14	-2.76	-2.64	-4.42	-4.19	-4.39	-2.29	-3.07	-2.39	-2.12	-0.257	-3.93	-4.75
-1.22	0.608	-0.0108	-0.188	2.36	-1.04	0.0447								-0.517	0.381	-2.84	-3.1	-4.55	-4.35	-4.66	-1.87	-3.28	-1.97	-1.13	0.285	-2.97	-5.08
-1.15	0.677	0.585	-0.526	1.65	-1.9	0.734								-0.638	-0.822	-2.99	-3.24	-4.72	-4.23	-4.31	-2.39	-3.23	-1.05	-1.74	-0.106	-3.31	-4.72
-1.12	0.332	-0.361	-0.565	1.03	-2.21	0.131								-1.01	0.00364	-2.99	-3.1	-4.46	-4.5	-4.56	-2.9	-3.13	-2.14	-0.64	0.347	-2.96	-5.45
-1.33	0.675	-0.404	0.177	1.97	-2.26	0.467								-1.1	-0.642	-3.04	-3.03	-4.17	-4.45	-4.61	-2.81	-3.04	-2.84	-1.31	-0.267	-3.68	-5.12
-1.36	0.792	0.174	0.22	1.71	-2.85	0.416								-0.882	-0.401	-3.02	-2.86	-4.68	-4.03	-4.53	-1.8	-3.15	-2.1	-0.886	0.449	-2.87	-6.13
-1.4	0.716	1.15	0.491	0.0274	-2	-0.0389								-0.8	-0.864	-3.35	-3.1	-4.69	-4.28	-3.89	-1.88	-2.54	-3.13	-1.05	-0.308	-3.06	-6.38
-1.38	1.04	1.08	0.287	1.99	-2.27	-0.269								-0.822	-0.282	-3.14	-3.3	-4.81	-4.31	-4.08	-3.12	-3.06	-1.84	-2.09	0.26	-3.2	-6.26
-1.31	1.14	0.471	0.748	0.22	-2.31	-0.106								-0.906	-0.472	-3.31	-3.12	-4.44	-4.28	-4.57	-2.55	-3.26	-2.66	-2.19	0.884	-2.95	-5.43
-1.2	0.878	1.07	-0.221	0.535	-2.37	-0.421								-0.553	-0.275	-3.3	-3.52	-4.62	-3.82	-4.45	-1.22	-3.01	-3.51	-0.326	-0.712	-3.62	-5.52
-1.26	0.89	0.103	-0.129	1.43	-2.17	-0.147								-0.611	-0.541	-3.14	-3.31	-5.02	-3.75	-4.82	-2.18	-3.15	-2.59	-1.55	0.335	-3.79	-5.04
-1.34	0.989	0.878	-0.134	1.11	-1.41	-0.197								-0.563	-0.87	-3.36	-3.26	-5.26	-4.16	-5.17	-3.49	-3.06	-2.99	-1.37	-0.0709	-3.1	-6.04
-1.38	1.18	2.62	-0.209	0.103	-2.45	-0.125								-0.139	-0.597	-3.29	-3.42	-5	-4.23	-4.44	-2.88	-3.13	-2.69	-1.61	0.012	-3.37	-5
-1.29	1.19	1.86	-1.14	1.18	-2.39	0.072								-0.365	-0.597	-3.48	-3.38	-5.11	-4.22	-4.94	-2.48	-2.99	-3.34	-1.57	0.158	-3.7	-5.46
-1.41	0.497	0.533	0.116	0.799	-2.91	0.509								-0.666	-0.855	-3.38	-3.41	-5.01	-4.37	-4.51	-1.89	-3.47	-3.08	-1.23	0.296	-3.21	-5.7
-1.39	1.15	1.81	0.163	0.947	-2.83	0.362								-0.862	-0.837	-3.38	-3.37	-4.91	-4.38	-5.23	-3.8	-3.17	-3.86	-1.19	-1.14	-3.61	-5.26
-1.39	1.05	0.408	-0.877	0.693	-2.34	-0.315								-0.515	-1.12	-3.37	-3.35	-5.28	-4.67	-5.96	-3.2	-3.05	-2.84	-0.939	-0.861	-3.48	-5.15
-1.41	1.22	1.45	-1.34	1.87	-2.67	0.455								-0.852	-0.821	-3.41	-3.7	-5.47	-4.89	-4.22	-2.79	-3.38	-3.82	-1.23	-1.12	-3.72	-6.35
-1.33	1.35	2.03	-0.239	1.97	-3.37	-0.00574								-0.708	-0.722	-3.46	-3.4	-5.08	-4.6	-5.24	-2.28	-3.2	-3.16	-1.14	-0.461	-3.29	-6.14
-1.32	1.32	1.27	0.215	1.47	-2.89	0.446								-0.843	-1.81	-3.35	-3.97	-4.81	-4.75	-4.61	-2.14	-3.43	-2.83	-1.82	-0.28	-3.88	-6
-1.44	1.1	1.47	0.0456	1.73	-1.21	-0.033								-0.913	-0.985	-3.4	-3.25	-4.96	-4.61	-4.97	-3.42	-2.82	-3.47	-1.3	1.3	-4.13	-5.74
-1.42	1.39	1.2	0.521	1.89	-1.43	0.416								-1.06	-1.87	-3.61	-3.18	-5.05	-4.53	-5.15	-3.81	-2.93	-3.75	-1.59	-0.234	-3.37	-6.57
-1.5	1.19	0.984	0.39	0.734	-1.15	0.76								-0.69	-0.985	-3.6	-3.2	-5.09	-4.67	-4.41	-4.19	-3.35	-3.22	-1.97	-0.707	-3.85	-5.35
-1.44	1.48	1.01	0.608	1.15	-1.02	1.39								-1.09	-0.791	-3.59	-3.38	-5.44	-5.46	-5.45	-3.13	-3.77	-3.37	-0.798	0.435	-3.69	-6.04
-1.29	1.35	2.24	0.277	1.9	-0.829	1.63								-1.03	-2.17	-3.61	-3.33	-5.39	-5.06	-5.16	-3.35	-3.51	-3.82	-1.73	-0.667	-4.34	-5.86
-1.32	1.36	1.26	-0.143	1.36	-0.491	2.31								-1.31	-1.4	-3.44	-3.39	-5.19	-4.73	-4.83	-2.61	-3.27	-3.4	-1.92	-0.362	-3.74	-6.4
-1.32	1.48	0.0691	0.314	1.43	-0.176	1.93								-1.09	-1.53	-3.58	-3.33	-5.83	-4.61	-4.8	-3.26	-3.27	-3.66	-0.477	-0.337	-3.9	-6.7
-1.33	1.44	0.836	0.243	1.95	-0.348	1.54								-1.2	-1.82	-3.88	-4.05	-5.47	-4.83	-5.03	-2.74	-3.47	-3.16	-1.85	-0.849	-4.1	-6.8
-1.4	1.34	1.73	-0.216	0.778	-1.01	1.1								-1.18	-1.35	-3.75	-3.61	-5.91	-3.88	-5.44	-2.81	-4.02	-3.63	-0.307	-1.28	-3.84	-6.41
-1.23	1.38	1.03	-0.491	0.705	-1.14	1.04								-1.22	-1.58	-3.5	-3.14	-5.57	-5	-5.71	-3.19	-3.9	-2.52	-1	-0.704	-3.89	-6.17
-1.37	1.59	2.44	-0.0481	0.184	-1.08	1.02								-1.41	-1.99	-3.61	-3.72	-5.66	-5.04	-5.27	-2.59	-4.04	-3.27	-1.45	-1.54	-3.82	-6.35
-1.39	1.63	0.714	-0.922	0.557	-2.2	1.87								-1.54	-1.41	-3.66	-3.32	-5.82	-5.2	-5.57	-3.8	-3.36	-4.25	-2.15	-1.34	-4.67	-5.87
-1.29	1.54	-0.197	-0.0673	1.83	-2.25	1.02								-1.72	-1.05	-3.8	-3.13	-5.61	-4.83	-5.87	-2.77	-3.67	-3.83	-1.65	0.0473	-4.73	-6.41
-1.34	1.59	1.43	0.264	1.55	-1.74	1.58								-1.77	-0.949	-3.83	-3.23	-5.51	-4.8	-5.34	-2.86	-3.04	-3.64	-0.106	-0.788	-3.85	-6.82
-1.4	1.36	0.959	0.0376	-0.0905	-1.48	0.161								-1.51	-0.837	-3.74	-3.43	-5.54	-5.05	-5.12	-1.88	-3.57	-3.48	-0.828	-1.56	-3.57	-6.71
-1.43	1.53	0.319	0.00622	1.44	-2.26	0.247								-1.53	-0.664	-3.74	-3.47	-5.57	-5.22	-4.28	-3.34	-3.5	-3.43	-1.51	-0.977	-3.72	-6.8
-1.46	1.25	-0.428	-0.658	0.665	-1.2	0.34								-1.31	-1.2	-3.73	-3.3	-5.53	-4.87	-5.39	-3.45	-3.22	-2.74	-0.913	-0.772	-4.35	-6.3
-1.6	1.16	1.26	-0.452	1.36	-1.5	0.601								-1.28	-1.37	-3.67	-2.81	-5.7	-5.41	-5.27	-2.86	-2.57	-3.34	-2.19	-1.23	-4.35	-7.22
-1.51	0.655	1.59	-0.752	2.4	-2.1	1.01								-1.47	-0.791	-3.8	-3.29	-5.85	-5.03	-5.21	-2.91	-2.12	-3.01	-0.901	-1.46	-4.21	-7.13
-1.56	0.86	1.64	-0.845	1.35	-1.34	0.495								-1.32	-1.8	-3.82	-3.15	-5.96	-5.93	-5.24	-3.42	-2.28	-3.39	-1.25	-1.49	-3.44	-7.34
-1.53	0.845	0.688	-0.409	0.0454	-1.32	0.184								-1.55	-1.48	-3.86	-3.32	-5.7	-4.95	-5.69	-3.18	-2.53	-3.33	-1.29	-0.922	-3.62	-7.44
-1.55	1.05	0.642	-1.28	0.823	-2.01	0.347								-1.32	-1.5	-3.72	-3.03	-5.95	-5.38	-5.42	-2.32	-2.39	-2.39	-1.82	-0.781	-3.25	-7.13
-1.4	1.09	1.94	-0.711	0.137	-0.987	0.236								-1.35	-1.18	-3.77	-3.36	-5.69	-5.31	-5.61	-3.14	-2.81	-3.17	-1.12	-0.14	-4.37	-7.46
-1.48	1.08	1.27	-1.4	0.928	-1.7	-0.231								-1.41	-1.67	-3.85	-3.27	-5.84	-5.47	-5.53	-3.95	-2.88	-3.28	-0.733	0.231	-3.66	-7.07
-1.64	0.881	0.227	-0.43	0.463	-1.59	0.807								-1.63	-2.38	-3.94	-3.41	-6.06	-5.38	-5.76	-3.17	-2.59	-3.2	-0.818	-1.54	-3.52	-7.39
-1.55	0.828	0.398	-0.423	-0.438	-0.788	0.122								-1.57	-1.8	-4.06	-3.22	-6.08	-5.28	-4.95	-3.15	-2.56	-4.08	-1.18	-0.774	-4.08	-6.81
-1.6	0.759	1.1	-1.24	0.357	-1.71	0.339								-1.8	-1.51	-3.94	-3.45	-6.16	-5.1	-5	-3.52	-1.71	-3.42	-1.96	-2.03	-3.81	-7.6
-1.52	0.945	1.16	-1.55	0.894	-2.09	0.79								-1.98	-2.2	-4.07	-3.53	-5.92	-5.47	-4.98	-3.23	-0.556	-3.29	-1.43	-0.855	-4.3	-7.66
-1.43	0.859	1.78	-0.671	0.353	-1.68	0.345								-1.78	-1.96	-4.06	-3.47	-5.97	-5.31	-3.96	-3.31	-0.715	-3.17	-0.924	-0.978	-4.17	-7.44
-1.38	0.788	1.14	-0.609	1.57	-1.57	0.294								-1.83	-2.62	-4.11	-3.54	-5.44	-5.81	-4.57	-3.17	-1.14	-3.7	-0.833	-1.26	-4.5	-7.46
-1.48	0.605	1.23	-0.654	0.632	-1.69	0.111								-2.06	-1.78	-4.15	-2.64	-5.56	-5.67	-5.76	-2.97	-0.958	-4.15	-0.585	-1.03	-4.59	-7.49
-1.53	1.04	0.789	-0.697	1.14	-2.83	-0.0456								-2.28	-1.07	-3.99	-2.56	-5.53	-5.58	-5.38	-3.05	-1.48	-3.37	-1.67	-0.758	-3.68	-7.22
-1.54	0.498	0.723	-0.995	0.601	-2.62	0.148								-2.09	-1.44	-4.01	-3.39	-5.64	-5.95	-4.24	-3.36	-1.91	-3.95	-1.46	-2.5	-4.43	-7.32
-1.62	1.05	0.854	-0.303	0.753	-2.18	0.503								-2.08	-1.31	-4.19	-3.33	-5.66	-5.93	-4.62	-3.91	-2.04	-4.46	-1.4	-0.976	-4.19	-7.54
-1.51	0.505	2.32	-0.891	0.833	-2.3	0.867								-1.99	-2.78	-4.17	-2.8	-5.47	-6.07	-4.67	-3.65	-2.14	-4.48	-0.26	-0.934	-5.04	-7.99
-1.54	0.877	0.132	-0.792	-1.47	-2.29	0.813								-2.08	-1.59	-4.22	-2.55	-5.47	-5.99	-4.57	-4	-2.49	-4.5	-1.01	-1.23	-4.85	-7.83
-1.51	1.68	0.538	-0.765	1.62	-2.5	0.844								-1.96	-1.45	-4.19	-2.2	-5.53	-5.97	-5.19	-3.64	-2.31	-4.78	-1.8	-1.57	-4.46	-7.14
-1.58	1.37	1.44	-0.663	1.31	-2.63	0.48								-2.11	-1.84	-4.16	-2.89	-5.82	-6.07	-5.06	-4.25	-1.97	-3.81	-0.962	-0.678	-4.41	-7.9
-1.61	1.12	1.05	-0.783	0.175	-2.14	-0.0125								-1.95	-2.02	-4.27	-2.36	-5.77	-6.17	-5.27	-3.1	-2.4	-2.95	-2.5	-0.223	-4.35	-7.55
-1.5	1.02	0.376	-0.578	-0.207	-2.85	1.01								-2.15	-1.96	-4.37	-2.87	-5.6	-6.11	-5.61	-2.79	-2.06	-4.52	-1.91	-1.34	-4.02	-7.92
-1.38	0.895	0.121	-1.26	2.04	-2.24	0.596								-2.17	-1.54	-4.28	-2.57	-5.88	-6.08	-4.43	-3.47	-2.61	-3.9	-2.18	-0.668	-3.96	-7.86
-1.35	0.699	0.428	-0.406	1.79	-2.3	0.143								-2.22	-1.87	-4.16	-2.25	-5.73	-6.21	-5.49	-3.8	-2.48	-3.71	-1.34	-1.27	-4.32	-7.84
-1.32	1.09	1.23	-0.349	-0.285	-2.45	0.511								-2.31	-1.84	-4.23	-2.67	-5.92	-6.16	-6.08	-3.07	-2.27	-4.83	-1.47	0.427	-4.7	-7.64
-1.56	0.788	1.93	-0.325	0.0114	-2.29	0.724								-2.11	-1.66	-4.26	-2.53	-5.65	-6.43	-5.05	-2.9	-2.32	-4.54	0.101	0.223	-4.46	-7.72
-1.54	0.731	0.364	-1.02	0.979	-2.45	0.499								-2.55	-1.88	-4.19	-2.63	-5.92	-6.77	-5.2	-3.53	-2.67	-4.04	-1.38	-0.552	-4.03	-7.44
-1.51	0.769	1.66	-1.77	0.126	-2.51	0.475								-2.34	-2.52	-4.24	-2.51	-5.97	-6.22	-5	-2.59	-2.32	-4.75	-1.15	-1.68	-4.24	-8.11
-1.52	0.683	0.618	-1.06	2.21	-2.23	0.819								-2.54	-2.24	-4.3	-2.95	-5.95	-6.71	-4.96	-4.11	-2.44	-4.74	-1.18	-1.36	-4.24	-7.35
-1.61	0.573	0.395	-0.548	1.37	-2.56	-0.263								-2.52	-2.12	-4.12	-2.68	-6.15	-6.71	-5.24	-3.17	-2.56	-4.03	-1.57	-1.86	-4.31	-7.72
-1.66	0.576	0.58	-0.872	0.37	-2.33	-0.105								-2.5	-0.946	-4.3	-2.8	-6	-6.54	-5.46	-3.4	-2.61	-5.11	-1.97	-1.02	-4.78	-8.01
-1.65	0.453	-0.396	-1.77	1.51	-2.41	0.332								-2.27	-1.18	-4.41	-2.93	-6.18	-6.69	-5.15	-4.17	-2.14	-5.29	-1.7	-0.374	-5.18	-8.56
-1.67	0.499	1.08	-2.02	1.02	-2.61	0.541								-2.56	-1.57	-4.26	-3.79	-6.06	-6	-4.7	-3.18	-2.63	-4.33	-2.1	-0.000328	-4.7	-8.15
-1.75	0.235	0.195	-1.42	0.57	-3.15	-0.19								-2.39	-1.74	-4.31	-3.46	-6.22	-6.42	-5.36	-4.07	-2.51	-4.38	-0.31	-2.29	-4.59	-8.42
-1.63	0.161	0.115	-1.07	0.753	-2.6	-0.536								-2.42	-0.0336	-4.34	-3.79	-5.79	-6.24	-5.12	-3.03	-2.76	-4.42	-0.5	-3.02	-5.02	-8.72
-1.58	0.51	-0.376	-1.69	-0.682	-2.81	-0.596								-2.44	-1	-4.34	-3.51	-5.87	-6.31	-5.82	-3.01	-2.82	-4	-0.223	-1.72	-5.06	-8.86
-1.58	0.126	0.903	-0.469	0.383	-2.84	-0.507								-2	-1.62	-4.26	-2.88	-5.82	-6.1	-4.7	-4.08	-3.3	-4.17	-1.14	-2.24	-4.77	-8.33
-1.63	0.0646	-0.00587	-1.55	1.37	-2.8	-0.561								-1.88	-1.59	-4.34	-3.05	-5.85	-6.28	-4.71	-3.87	-3.31	-3.53	-0.666	-0.981	-4.45	-8.74
-1.64	-0.0798	0.281	-1.6	-0.419	-3.45	-0.387								-1.53	-1.2	-4.48	-2.99	-5.92	-6.26	-5.12	-3.86	-3.23	-5.92	-1.52	-1.39	-4.18	-8.49
-1.51	-0.0298	0.827	-1.8	0.773	-2.85	-0.0362								-1.64	-1.2	-4.38	-3.19	-6.14	-6.3	-5.28	-3.4	-2.89	-4.43	-1.22	-1.1	-5.17	-7.87
-1.6	-0.118	0.797	-1.81	0.785	-3.36	-0.0526								-1.31	-1.61	-4.08	-2.9	-5.56	-6.47	-5.26	-3.04	-3.08	-5.29	-1.33	-1.8	-4.29	-7.56
-1.49	-0.127	0.78	-1.89	0.00953	-2.41	-0.97								-1.82	-1.65	-4.41	-3.13	-5.31	-6.61	-5.55	-2.8	-3.18	-5.15	-1.37	-1.52	-4.64	-7.73
-1.59	-0.0164	0.993	-1.59	-0.607	-2.86	-0.344								-1.61	-2.22	-4.24	-3.16	-4.95	-6.73	-5.63	-3.56	-2.97	-5.53	-0.633	-0.926	-4.62	-8.03
-1.46	-0.00948	-0.0762	-1.81	1.37	-3.09	-1.07								-1.76	-2.02	-4.26	-2.96	-5.01	-6.6	-5.36	-4.07	-3.21	-5.43	-1.34	-2.09	-4.68	-7.87
-1.56	-0.0147	0.299	-2.16	1.51	-2.31	-1.24								-1.98	-1.54	-4.25	-2.92	-5.37	-6.61	-5.59	-4.13	-3.29	-5.43	-0.49	-1.49	-4.08	-7.97
-1.55	0.11	0.441	-1.68	0.384	-2.76	-1.53								-1.91	-0.938	-4.26	-3.29	-5.16	-7.03	-5.25	-3.7	-3.13	-5.21	-1.71	-2.25	-4.75	-7.76
-1.57	-0.322	0.0165	-1.1	1.34	-3.15	-1.01								-1.97	-1.58	-4.4	-3.3	-5.45	-7	-5.09	-3.85	-2.84	-4.78	-1.28	-2.23	-5	-7.08
-1.52	0.311	0.883	-1.61	-0.0581	-3.17	-0.659								-1.78	-2.23	-4.5	-3.38	-5.62	-7.15	-6.07	-3.27	-3.03	-5.07	-1.47	-0.966	-5.03	-7.63
-1.6	0.187	0.824	-1.48	1.04	-3.65	-1.58								-1.7	-1.96	-4.4	-2.94	-5.41	-6.97	-4.67	-3.35	-3.58	-5.27	-2.1	-1.04	-4.46	-7.89
-1.57	0.455	-1.18	-1.67	0.497	-3.44	-1.43								-1.92	-1.44	-4.51	-2.81	-5.43	-6.79	-5.13	-2.81	-3.26	-5.83	-0.895	-2.28	-4.29	-8.01
-1.58	0.435	0.686	-1.86	1.25	-2.85	-1.63								-1.94	-1.92	-4.37	-3.23	-5.56	-6.8	-4.95	-3.37	-3.19	-4.97	-1.5	-0.455	-4.45	-8.29
-1.55	0.268	0.0866	-2.39	0.394	-3.35	-1.61								-1.98	-1.89	-4.29	-3.63	-5.55	-6.79	-5.3	-3.86	-3.52	-5.12	-3.42	-2.21	-4.83	-8.59
-1.53	0.61	0.488	-2.27	0.305	-3.43	-2.62								-2.28	-1.71	-4.29	-3.27	-5.68	-7.06	-4.96	-3.14	-3.18	-6.27	-0.864	-1.9	-4.46	-8
-1.48	0.456	-0.551	-2.42	-0.83	-3.78	-2.16								-2.47	-1.85	-4.39	-3.47	-5.9	-7.02	-5.05	-3.02	-3.34	-4.84	-1.64	-2.66	-4.22	-8.21
-1.54	0.689	0.325	-2.27	0.492	-3.63	-1.07								-2.02	-1.55	-4.58	-3.16	-5.88	-6.78	-5.34	-3.33	-3.7	-4.86	-1.26	0.0428	-4.43	-7.71
-1.52	0.746	0.722	-2.27	1.29	-3.87	-1.06								-1.72	-1.89	-4.24	-3.68	-5.83	-7.18	-5.2	-3.17	-3.17	-4.98	-1.4	0.337	-5.26	-8.84
-1.55	0.637	0.519	-2.11	1.92	-2.69	-0.791								-2	-1.73	-4.34	-3.33	-6.09	-7.15	-4.75	-3.55	-3.74	-5.47	-1.33	-2.59	-4.69	-8.14
-1.6	1.08	-1.11	-1.88	-0.445	-3.83	-1.22								-2.21	-1.74	-4.45	-3.62	-5.95	-6.87	-4.44	-3.45	-4.06	-6.52	-1.75	-1	-5.25	-8.51
-1.7	1.27	0.0884	-3.05	0.0247	-3.78	-0.9								-2.21	-0.656	-4.39	-4.49	-5.7	-6.81	-5.97	-3.7	-3.55	-5.5	-0.619	-2.45	-5.25	-7.41
-1.63	1.07	0.571	-1.94	1.05	-3.75	-1.09								-2.3	-1.01	-4.54	-3.63	-6.06	-6.87	-5.38	-3.71	-3.33	-5.19	0.107	-2.12	-4.56	-8.37
-1.59	0.885	0.0823	-1.92	0.372	-3.11	-0.796								-1.85	-0.126	-4.56	-4.16	-5.91	-7.33	-6.22	-4.48	-3.83	-5.11	-1.03	-1.99	-4.64	-8.46
-1.62	1.43	-0.529	-1.95	0.118	-3.2	-0.21								-2.08	-1.8	-4.33	-3.83	-6.13	-7.09	-4.34	-4.61	-3.72	-5.31	-1.41	-0.876	-5.25	-8.72
-1.52	0.964	0.404	-2.37	-0.282	-3.12	-0.539								-2.17	-1.61	-4.61	-3.78	-5.85	-6.88	-4.49	-3.16	-3.61	-4.87	-1.18	-2.11	-5.28	-8.34
-1.51	1.26	0.109	-2	0.984	-3.23	-0.725								-2.14	-0.856	-4.51	-3.99	-5.87	-7.06	-5.83	-2.56	-3.54	-5.13	-0.823	-2.34	-4.81	-8.54
-1.55	0.977	0.438	-2.59	-0.457	-3.03	-0.439								-2.19	-2.18	-4.28	-4.09	-5.93	-7.45	-5.73	-3.93	-3.3	-6.83	-1.3	-0.863	-4.93	-8.63
-1.59	1.12	0.822	-2.33	-0.183	-3.36	0.0929								-2.26	-1.49	-4.48	-3.33	-5.58	-6.95	-4.58	-4.25	-3.51	-5.53	-1.76	-0.88	-4.32	-8.46
-1.53	0.97	-0.686	-2.18	-0.258	-3.14	0.655								-2.42	-2.02	-4.5	-3.54	-5.79	-7.46	-4.97	-3.35	-3.56	-5.82	-1.58	-2.09	-4.92	-8.39
-1.47	0.334	0.625	-2.08	0.491	-3.47	1.74								-2.41	-1.34	-4.52	-3.9	-6.3	-7.22	-5.08	-4.37	-3.4	-5.98	-1.28	-0.948	-4.6	-8.18
-1.43	0.206	1.1	-2.05	0.807	-3.36	2.4								-2.3	-1.92	-4.31	-3.75	-5.86	-7.09	-6.14	-3.54	-3.27	-6	-0.93	-1.56	-5.32	-8.29
-1.46	0.297	0.198	-2.08	0.0295	-3.37	3.46								-2.45	-1.54	-4.36	-3.19	-6.19	-6.84	-5.84	-3.98	-3.24	-5.64	-1.96	-1.1	-4.45	-8.31
-1.37	-0.0806	-0.338	-2.49	1.34	-3.83	2.61								-2.2	-1.27	-4.64	-3.93	-6.14	-6.95	-4.63	-4.65	-2.78	-5.73	-1.25	-1.79	-5.15	-8.42
-1.4	-0.414	-0.141	-2.9	-0.208	-3.49	2.54								-2.44	-1.62	-4.72	-3.33	-5.98	-6.39	-5.14	-3.57	-2.64	-6.13	-2.21	-1.89	-4.94	-8.46
-1.39	-0.196	0.466	-2.88	-0.0255	-3.61	1.94								-2.05	-1.67	-4.57	-3.66	-6	-7.32	-4.98	-4.27	-3.43	-5.86	-1.78	-2.53	-4.48	-7.79
-1.45	-0.431	0.345	-2.27	0.712	-2.77	1.77								-2.5	-1.7	-4.43	-4.24	-5.78	-6.42	-4.95	-4.32	-2.87	-6.21	-0.858	-2.34	-4.95	-8.97
-1.38	-1.35	0.0487	-2.79	0.294	-3.78	2.07								-2.06	-1.18	-4.61	-3.96	-6.02	-7.41	-4.33	-3.68	-3.31	-5.59	-2.56	-1.39	-4.27	-8.67
-1.33	-0.844	0.927	-2.96	2.86	-3.05	1.08								-1.97	-1.35	-4.41	-4.08	-6.01	-7.25	-3.87	-3.61	-3.69	-6.05	-2.02	-2.96	-4.45	-8.75
-1.4	-0.731	-0.217	-2.18	-0.58	-3.18	1.1								-2.29	-1.33	-4.48	-4.01	-6.12	-6.28	-5.32	-2.97	-3.27	-5.94	-1.45	-1.3	-5.69	-8.12
-1.09	-0.841	1.05	-3.19	0.103	-3.55	2.04								-2.43	-2.28	-4.54	-4.27	-5.98	-6.46	-5.58	-4.57	-3.81	-5.51	-2.35	-2.59	-4.69	-8.7
-0.888	-0.9	0.292	-2.87	1.29	-4.01	1.22								-2.12	-2.23	-4.43	-3.23	-6.28	-6	-5.63	-3.78	-3.52	-5.3	-2.37	-1.78	-4.93	-8.1
-0.784	-0.449	1.96	-2.65	2.12	-3.74	1.59								-2.36	-1.8	-4.68	-3.1	-6.16	-6.72	-5.3	-3.54	-3.33	-5.02	-2.32	-1.37	-5.06	-8.54
-0.883	-0.424	1.1	-2.91	1.36	-3.63	0.89								-2.31	-2.95	-4.71	-3.78	-5.94	-6.4	-4.98	-3.76	-3.69	-5.05	-2.4	-2.14	-5.28	-8.86
-0.832	-0.564	0.281	-2.43	0.0447	-4.32	0.22								-2.23	-2.82	-4.63	-3.63	-6.17	-6.27	-5.67	-3.52	-3.67	-5.97	-1.28	-1.49	-5.41	-8.66
-0.877	-0.124	0.0663	-3.28	0.414	-3.79	0.593								-2.27	-2.16	-4.73	-3.6	-6.59	-5.98	-5.07	-4.37	-3.39	-5.81	-2	-1.73	-4.66	-8.47
-0.878	-0.0281	0.482	-2.14	-0.187	-3.98	0.405								-2.45	-1.79	-4.69	-3.69	-6.02	-6.02	-5.4	-4.09	-3.5	-5.9	-2.03	-1.93	-5.33	-8.61
-0.858	-0.297	-0.178	-2.27	0.131	-4.48	0.657								-2.49	-1.92	-4.56	-4.16	-6.3	-6.47	-4.88	-4.2	-3.06	-5.82	-2.32	-1.12	-5.06	-7.74
-0.823	-0.907	-0.396	-2.14	0.304	-4.37	0.0766								-2.28	-1.25	-4.15	-3.65	-6.39	-6.57	-5.19	-3.55	-3.01	-5.02	-2.17	-0.969	-4.93	-7.89
-0.909	-1.13	1.73	-2.46	1.05	-4.3	0.27								-2.46	-1.67	-4.26	-3.63	-6.4	-6.56	-4.21	-4.08	-3.58	-5.2	-2.16	-1.36	-4.54	-7.85
-0.945	-1.01	0.266	-3.05	0.399	-3.89	-0.338								-2.64	-1.71	-4.08	-3.28	-6.39	-6.27	-4.81	-3.87	-3.91	-5.76	-1.22	-2	-5.37	-8.59
-1.05	-1.75	1.52	-2.84	-0.117	-3.79	-0.103								-2.46	-1.29	-4.19	-3.12	-6.53	-6.83	-4.09	-3.63	-3.63	-6.37	-2.3	-3.14	-4.84	-8.26
-1.08	-1.84	-0.0886	-3.48	0.63	-3.19	0.128								-2.33	-1.91	-4.03	-3.17	-6.87	-6.53	-5.7	-4.35	-3.23	-5.43	-0.56	-2.7	-4.89	-8.31
-1.06	-1.21	-1.02	-2.72	0.697	-3.75	0.422								-2.28	-1.8	-4	-3.74	-6.6	-6.83	-4.69	-3.16	-3.14	-5.47	-1.71	-1.71	-4.79	-8.47
-0.961	-1.62	-0.758	-2.83	1.72	-3.39	0.364								-2.82	-2.24	-4.07	-3.85	-6.67	-6.19	-5.5	-3.33	-3.38	-6.3	-2.95	-1.27	-5.48	-8.63
-1.08	-1.82	0.148	-2.61	1.1	-3.4	0.964								-2.71	-1.47	-4.09	-3.61	-6.69	-6.77	-5.26	-3.37	-3.36	-6.8	-2.58	-1.83	-4.95	-8.47
-1.14	-1.74	0.417	-3.29	-0.0282	-3.75	0.377								-2.76	-1.02	-4.1	-3.49	-6.63	-6.43	-5.95	-2.89	-3.02	-6.36	-1.99	-2	-4.62	-8.63
-1.24	-1.88	-0.0305	-3.1	-0.559	-4.02	0.321								-2.62	-0.179	-4.22	-3.36	-6.41	-6.75	-5.71	-3.05	-2.76	-6.34	-2.38	-2.19	-5.49	-8.01
-1.18	-1.19	0.942	-2.76	0.702	-4.22	-0.307								-2.53	-0.508	-4.13	-4.06	-6.23	-6.62	-5.3	-3.68	-3.03	-6.7	-1.64	-0.904	-4.79	-8.62
-1.2	-1.32	0.769	-2.87	0.715	-4.26	0.123								-2.62	-0.47	-4	-3.64	-6.16	-6.25	-4.77	-3.48	-2.96	-6.71	-1.14	-2.29	-4.97	-8.36
-1.21	-1.71	0.64	-2.63	-0.371	-4.2	-0.391								-2.82	0.0172	-3.7	-3.35	-6.34	-6.17	-6.14	-4.7	-3.47	-6.28	-1.53	-2.57	-4.98	-8.16
-1.15	-1.13	0.642	-2.15	0.654	-4.31	0.0394								-2.41	-1.08	-3.94	-3.63	-6.4	-6.19	-4.69	-4.12	-2.46	-6.34	-1.63	-1.69	-4.83	-7.55
-1.28	-1.03	0.158	-2.81	0.844	-3.79	0.604								-2.61	-0.923	-4	-3.31	-6.34	-6.34	-4.73	-3.93	-2.74	-6.98	-2.03	-2.34	-4.65	-8.44
-1.26	-1.22	-0.00162	-3.18	2.29	-4.08	-0.432								-2.79	-0.913	-3.98	-3.47	-6.31	-6.64	-4.66	-3.95	-2.59	-6.33	-2.19	-1.41	-4.97	-8.36
-1.14	-1.19	0.0609	-3.25	-0.266	-3.56	-0.807								-2.81	-0.994	-3.89	-3.52	-6.49	-6.75	-5.01	-3.85	-2.94	-7.19	-1.65	-2.07	-4.53	-7.73
-1.05	-1.56	0.16	-2.42	-0.375	-4.23	-0.646								-2.4	-1.79	-3.92	-3.67	-6.11	-6.92	-5.64	-4.61	-2.72	-7.1	-1.39	-2.01	-4.83	-8.64
-1.15	-1.17	-0.434	-3.07	0.617	-3.61	-0.555								-2.64	-1.22	-4.22	-3.97	-6.08	-6.85	-5.66	-4.05	-2.8	-7.69	-0.985	-0.322	-5.59	-8.07
-1.17	-1.04	0.095	-2.55	0.552	-4.2	0.0803								-2.59	-1.4	-3.95	-3.79	-5.76	-6.65	-5.65	-4.72	-2.42	-7.42	-3.2	-2.67	-5.21	-8.33
-1.11	-1.2	-0.219	-2.89	1.47	-3.85	-0.352								-2.61	-0.807	-4.13	-3.39	-5.52	-6.8	-5.55	-4.6	-2.47	-6.82	-3.39	-1.33	-4.98	-8
-1.06	-0.972	1.15	-2.62	0.382	-4.09	-0.786								-2.65	-1.57	-4.2	-3.15	-5.87	-6.61	-4.99	-4.61	-3.08	-7.27	-2.1	-2.23	-4.52	-8.35
-1.12	-0.996	-0.737	-3.1	1.07	-4.19	-0.814								-3.01	-2.04	-4.02	-3.52	-5.87	-6.62	-4.76	-3.9	-3.08	-6.42	-2.18	-1.86	-5.26	-8.16
-1.14	-1.42	1.06	-2.77	0.262	-4.67	-0.35								-3.03	-1.37	-3.69	-3.11	-5.99	-6.91	-5.17	-4.03	-2.89	-6.03	-2.17	-1.56	-5.59	-8.48
-1.16	-1.83	-0.174	-2.57	2.53	-4.07	-0.944								-2.63	-1.19	-3.27	-3.32	-6.05	-6.31	-5.15	-4.14	-2.79	-6.84	-2.32	-0.956	-5.31	-8.91
-1.29	-1.69	0.954	-3.33	0.902	-4.1	-1.01								-2.61	-1.63	-3.14	-3.58	-6.14	-6.61	-5.05	-3.59	-3.22	-7.48	-2.59	-0.903	-5.18	-8.89
-1.21	-1.71	0.156	-2.63	0.732	-4.24	-1.18								-2.94	-2.12	-3.22	-3.01	-5.93	-6.53	-5.5	-4.22	-3.31	-6.72	-2.09	-1.97	-4.75	-9.04
-1.22	-1.3	0.338	-3.14	-0.0678	-4.03	-1.15								-2.66	-2.08	-3.27	-3.4	-6.22	-6.77	-5.66	-4.09	-3.75	-6.95	-1.86	-1.15	-4.86	-8.73
-1.24	-1.93	-1.85	-2.89	0.964	-4.02	-0.545								-2.62	-1.38	-3.38	-3.2	-5.77	-6.31	-4.84	-3.33	-3.39	-7.59	-3.35	-2.53	-4.73	-8.87
-1.21	-1.62	0.919	-3.06	0.675	-3.96	-0.867								-2.73	-2.04	-3.55	-3.02	-6.09	-6.6	-3.67	-3.96	-3.64	-8.02	-2.16	-1.87	-5.63	-8.82
-1.14	-1.86	-0.673	-3.36	0.0283	-4.03	-0.468								-2.91	-1.71	-3.48	-2.96	-6.37	-6.25	-4.37	-4.25	-3.57	-7.42	-1.5	-2.61	-5.67	-8.47
-1.22	-1.44	0.152	-3.67	0.941	-3.7	-0.508								-3.02	-1.16	-3.37	-3.1	-6.1	-6.56	-4.98	-3.24	-2.97	-7.41	-2.22	-2.17	-5.4	-8.52
-1.24	-0.962	-0.221	-3.3	-0.453	-4.52	-0.322								-3.17	-1.15	-3.64	-2.21	-6.48	-6.71	-5.2	-3.83	-3.51	-6.84	-1.19	-1.52	-5.59	-8.93
-1.24	-1.17	-0.411	-3.69	1.46	-4.28	-0.199								-2.92	-1.42	-3.42	-2.84	-6.54	-6.6	-5.13	-4.49	-3.3	-7.54	-1.44	-2.37	-5.47	-8.35
-1.32	-0.781	0.714	-2.92	0.847	-3.92	-0.431								-2.98	-1.85	-3.64	-2.91	-6.21	-6.69	-5.81	-4.68	-3.97	-6.66	-1.8	-1.62	-5.06	-8.51
-1.31	-0.839	0.389	-3.18	1.2	-3.96	-0.551								-2.75	-1.47	-3.79	-3.44	-5.92	-6.06	-5.19	-4.13	-3.92	-6.6	-1.79	-1.98	-5.29	-8.39
-1.18	-0.843	1.69	-2.61	1.16	-4.12	-0.277								-2.67	-1.85	-3.7	-3.32	-6.43	-6.6	-5.4	-3.34	-3.97	-6.88	-0.671	-1.44	-4.49	-8.65
-1.23	-0.687	0.905	-3.42	1.74	-3.8	0.165								-2.65	-0.706	-3.71	-3.43	-6.28	-6.68	-4.34	-3.98	-3.67	-7.58	-1.35	-2.2	-4.74	-8.2
-1.26	-0.948	1.65	-2.79	2.07	-4.43	-0.149								-2.87	-0.697	-3.7	-3.66	-6.43	-6.57	-3.95	-3.72	-3.83	-6.77	-2.26	-1.45	-5.21	-8.01
-1.28	-0.862	0.403	-2.78	1.21	-4.01	-0.509								-2.64	-1.55	-3.8	-3.42	-6.11	-6.42	-4.57	-3.36	-3.35	-6.54	-2.4	-1.6	-5.72	-8.22
-1.24	-0.979	0.0629	-3.3	0.0685	-3.98	-0.666								-2.8	-1.83	-3.58	-3.32	-5.84	-6.43	-5.25	-4.13	-3.56	-6.72	-2.45	-1.74	-4.94	-8.68
-1.13	-0.43	0.315	-2.94	-0.44	-4.22	-0.514								-2.74	-1.8	-3.64	-3.34	-5.98	-7.21	-5.19	-4.3	-3.36	-7.42	-0.959	-2.49	-5.19	-8.78
-1.05	-0.0904	-1.22	-3.13	0.104	-4.14	-0.789								-2.64	-1.18	-3.72	-3.66	-6.01	-6.47	-5.11	-4.1	-3.93	-7.81	-2.51	-1.12	-4.62	-8.02
-0.834	-0.553	-0.253	-2.79	0.961	-4.67	-1.14								-2.73	-1.6	-3.64	-3.54	-5.77	-6.98	-4.99	-4.33	-4.04	-7.58	-1.57	-2.15	-5.28	-8.91
-0.911	-0.447	0.078	-3.95	1.92	-4.81	-0.887								-2.81	-1.94	-3.89	-3.9	-6.09	-6.94	-4.99	-3.55	-3.67	-6.88	-1.86	-1.53	-5.2	-8.73
-0.952	-0.279	0.22	-2.61	0.493	-4.48	-1.34								-3.02	-1.84	-4	-3.82	-5.83	-6.61	-3.89	-4.22	-3.58	-6.64	-1.63	-1.36	-5.56	-9.34
-1.01	-0.402	-0.542	-2.48	-0.104	-4.69	-1.13								-3.01	-1.26	-4.07	-3.78	-5.9	-6.72	-4.62	-4.63	-3.75	-6.36	-1.78	-2.52	-5.11	-8.33
-1.02	-0.794	0.449	-3.26	1.47	-4.02	-1.18								-2.94	-2.08	-3.9	-3.96	-6.36	-6.68	-5.26	-4.11	-3.04	-6.55	-1.34	-0.629	-4.55	-8.55
-1.01	-0.335	0.715	-3.58	1.26	-4.8	-0.787								-3.11	-1.53	-4.05	-3.17	-6.47	-6.99	-4.69	-4.22	-2.38	-6.72	-2.16	-1.97	-4.95	-9.1
-1.05	-0.276	-0.355	-2.95	1.02	-4.69	-1.29								-3.08	-1.12	-3.94	-3.52	-6.48	-7.17	-4.42	-3.65	-2.82	-6.79	-2.24	-1.6	-5.55	-8.56
-1.04	-0.4	-1.22	-3.8	0.179	-4.97	-1.3								-2.9	-1.07	-4.23	-2.97	-6.3	-6.38	-5.02	-4.97	-2.81	-6.84	-2.61	-2.4	-5.78	-8.66
-1.09	-0.268	0.776	-3.08	-0.686	-4.2	-1.17								-3.14	-0.856	-3.97	-3.67	-6.3	-6.72	-4.78	-4.09	-3.13	-6.13	-1.95	-0.71	-5.49	-8.43
-1.12	-0.33	0.124	-3.09	0.3	-4.34	-0.987								-3.19	0.24	-4.11	-3.85	-6.06	-6.38	-3.76	-4.7	-2.74	-7.33	-1.73	-1.82	-5.27	-9.27
-1.09	-0.375	-0.352	-3.12	0.814	-4.19	-1.19								-3.1	-0.624	-3.89	-3.31	-6.12	-6.59	-4.66	-4.29	-2.7	-7.07	-2.43	-0.649	-5.69	-8.7
-1.08	-0.157	-0.754	-3.29	0.339	-4.16	-1.34								-3.16	-1.05	-3.96	-3.63	-5.96	-6.29	-4.54	-4.76	-2.93	-6.27	-1.91	-1.38	-5.51	-8.86
-1.09	-0.236	-0.54	-3.99	1.7	-4.06	-1.42								-3.26	-1.91	-4.02	-3.51	-6.11	-6.93	-5.7	-4.51	-2.96	-6.06	-1.71	-1.98	-5.11	-8.69
-1.13	-0.252	1.23	-3.91	1.11	-4.93	-2.23								-3.15	-1.76	-3.89	-3.67	-6.1	-6.45	-5.3	-4.25	-2.67	-6.67	-0.0761	-2.81	-4.95	-8.59
-1.2	-0.33	-0.754	-3.57	0.861	-4.48	-1.56								-3.06	-1.57	-3.95	-3.35	-6.35	-5.88	-5.72	-3.44	-2.08	-6.79	-1.77	-1.53	-5.22	-7.24
-1.14	-0.345	-0.204	-2.42	0.38	-4.12	-0.601								-3.04	-2.19	-3.84	-3.08	-6.15	-5.63	-5.22	-4.26	-2.14	-7	-1.99	-0.872	-5.53	-6.86
-1.23	-0.175	-0.36	-3.66	0.805	-4.56	-0.913								-3.06	-0.917	-4.03	-3.22	-6.25	-6.04	-5.69	-3.98	-2.21	-6.49	-0.748	-1.38	-5.16	-7.64
-1.1	-0.303	-0.332	-3.3	0.339	-4.67	-0.767								-2.97	-1.75	-4.2	-3.61	-6.08	-6.76	-5.08	-4.79	-2.23	-6.19	-1.94	-1.77	-5.25	-7.66
-0.998	-0.487	0.513	-3.35	1.26	-4.64	-0.817								-2.77	-1.52	-4.07	-3.92	-6.5	-6.54	-5.36	-4.66	-2.44	-6.72	-0.843	-2.36	-4.85	-8.29
-0.999	-0.585	-0.308	-3.18	1.28	-4.69	-0.826								-3.06	-1.15	-4.15	-3.68	-6.37	-6	-5.97	-4.22	-2.74	-7.06	-2.29	-2.04	-4.91	-7.68
-0.997	-0.349	0.393	-2.9	0.768	-4.14	-0.167								-3.01	-1.29	-4.21	-3.76	-5.86	-6.65	-6.02	-3.94	-2.49	-7.37	-1.77	-2.07	-5.1	-8.49
-0.936	-0.603	-0.776	-3.01	0.917	-4.7	-1.27								-3.22	-0.763	-4.13	-3.22	-6.21	-6.5	-5.25	-3.63	-2.85	-5.98	-1.71	-3.29	-5.77	-8.36
-0.887	-0.29	-0.598	-4.05	1.09	-4.55	-0.736								-3.35	-1.03	-4.24	-3.02	-6.02	-7.04	-5.81	-3.32	-3.39	-6.77	-2.11	-1.8	-5.4	-7.86
-1.01	-0.4	-0.403	-3.48	0.665	-4.81	-0.99								-3.07	-0.594	-4.18	-2.75	-6.28	-6.93	-5.08	-3.85	-3.28	-7.3	-0.751	-1.27	-5.74	-8.07
-0.957	-0.532	-0.694	-3.56	0.845	-4.54	-1.07								-3.23	-0.931	-4.26	-3.89	-6.3	-6.97	-5.75	-3.56	-3.47	-6.67	-0.949	-1.59	-4.91	-9.28
-0.913	-0.433	-0.501	-3.49	0.27	-4.11	-1.38								-3.23	-1.93	-4.15	-3.84	-6.43	-6.95	-6.39	-4.31	-2.89	-6.67	-1.16	-3.26	-4.85	-9.09
-1.03	-0.604	0.66	-3.25	0.309	-4.08	-0.937								-3.47	-1.16	-4.3	-3.74	-6.74	-7.08	-6.08	-4.62	-3.08	-6.88	-1.29	-2.21	-5.42	-8.93
-1.07	-0.641	-0.668	-3.39	0.43	-4.4	-0.796								-3.22	-1.27	-4.52	-3.85	-6.65	-6.61	-5.81	-5.08	-2.57	-6.27	-1.63	-1.58	-5.22	-8.8
-1.09	-0.743	0.0275	-3.89	0.619	-4.13	-0.852								-3.58	-0.552	-4.6	-4.27	-6.81	-6.72	-6.3	-4.66	-2.85	-6.85	-1.01	-1.92	-5.66	-9.15
-1.02	-0.607	-1.53	-2.73	0.748	-4.92	-0.593								-3.2	-0.969	-4.47	-4.17	-6.24	-7.19	-5.33	-4.38	-2.69	-7.16	-1.7	-1.4	-5.4	-8.37
-1	-0.809	0.341	-2.66	0.24	-4.37	-0.854								-3.18	-0.68	-4.4	-3.73	-6.4	-6.89	-5.69	-3.77	-2.5	-7.41	-1.98	-1.16	-5.4	-8.4
-1.04	-0.719	-0.812	-4.51	0.303	-4.18	-1.17								-2.89	-0.928	-4.6	-4.01	-6	-7.05	-5.98	-4.5	-2.1	-7.59	-0.86	-1.7	-4.81	-8.13
-1.07	-0.925	-0.798	-3.33	0.459	-4.59	-1.43								-2.96	-1.19	-4.29	-3.92	-6.07	-7.24	-6.12	-2.85	-2.76	-7.39	-1.05	-2.46	-5.17	-8.69
-1.02	-0.814	-0.592	-3.96	-0.698	-4.22	-1.6								-2.59	-1.14	-4.27	-4.07	-6.31	-7	-4.76	-4.32	-2.98	-6.72	-1.75	-1.37	-5.39	-8.84
-1.03	-1.05	-0.314	-2.62	-0.732	-4.86	-2.21								-2.72	-1.21	-4.28	-3.61	-6.13	-6.46	-4.89	-4.1	-2.64	-7.19	-2.58	-0.519	-5.38	-8.42
-1.03	-0.85	0.0497	-3.21	0.832	-4.01	-1.33								-3.01	-0.79	-4.12	-3.27	-5.82	-7.04	-5.12	-4.32	-2.04	-7.52	-2.5	-1.94	-5.37	-7.72
-1.08	-1.05	0.594	-3.28	0.111	-4.98	-0.818								-2.68	-1.32	-4.13	-3.69	-6.02	-6.62	-4.71	-4.88	-2.27	-6.42	-1.64	-2.74	-5.31	-8.04
-1.09	-0.782	0.416	-3.76	-0.909	-4.4	-1.29								-2.9	-1.27	-4.24	-2.9	-5.95	-7.38	-5.78	-4.22	-2.86	-6.51	-1.7	-2.28	-5.47	-9.17
-1.1	-0.842	-0.464	-3.65	-0.256	-4.38	-1.34								-2.9	-0.673	-4.27	-3.63	-6.02	-7.26	-5.09	-3.74	-3.19	-5.72	-0.463	-2.78	-5.04	-8.55
-1.13	-0.801	0.278	-4.01	0.299	-4.29	-1.31								-3.52	-0.941	-4.27	-3.78	-6.26	-6.97	-4.87	-4.59	-2.97	-6.48	-1.92	-2.9	-4.6	-9.11
-1.08	-0.86	-0.895	-4.03	-0.228	-4.56	-0.85								-3.09	-1.74	-4.39	-3.33	-6.49	-7.53	-3.53	-4.21	-3.26	-6.86	-0.778	-0.895	-5.32	-9.81
-1.13	-0.792	0.404	-3.34	0.36	-4.35	-0.94								-3.26	-1.8	-4.5	-3.71	-6.47	-8.12	-4.08	-4.26	-3.21	-7.21	-2.3	-0.717	-5.74	-9
-1.06	-0.822	-0.422	-3.31	0.183	-3.57	-1.55								-3.33	-1.86	-4.42	-3.19	-6.21	-7.67	-4.54	-4.59	-2.73	-7.24	-2.65	-1.76	-5.26	-7.87
-0.993	-0.905	0.0356	-3.02	0.208	-3.03	-1.26								-3.15	-2.38	-4.72	-3.77	-6.27	-7.51	-4.56	-4.21	-2.95	-6.72	-1.86	-1.36	-5.95	-8.32
-1.01	-0.695	-0.791	-3.09	0.328	-4.11	-1.52								-3.21	-2.64	-4.59	-3.83	-6.54	-7.14	-3.76	-4.49	-2.68	-7.63	-2.51	-2.18	-5.97	-8.87
-0.933	-0.717	-0.428	-3.45	0.614	-3.4	-1.15								-3.03	-1.68	-4.76	-2.83	-6.33	-7.32	-3.81	-3.99	-3.04	-6.59	-2.91	-1.23	-5.99	-9.17
-0.905	-0.581	0.665	-3.53	0.629	-4.1	-1.34								-3.37	-1.19	-4.63	-2.96	-6.17	-7.94	-4.55	-3.93	-3.39	-7.11	-1.77	-2.24	-5.48	-8.15
-0.687	-0.634	0.473	-3.7	-0.193	-3.79	-2.15								-3.04	-1.48	-4.58	-3.26	-6.2	-7.61	-5.02	-4.02	-2.77	-6.71	-1.11	-2.12	-5.15	-9.07
-0.717	-0.585	-0.855	-4.51	0.851	-4.47	-1.52								-2.81	-2.26	-4.56	-2.77	-6.9	-7.89	-4.91	-3.63	-2.8	-7.61	-1.88	-1.44	-5.11	-8.58
-0.555	-0.427	-0.184	-3.41	0.823	-4.74	-1.9								-2.4	-1.73	-4.67	-3.57	-6.61	-6.95	-3.96	-4.91	-2.77	-7.72	-1.48	-1.38	-4.54	-9.45
-0.692	-0.165	0.235	-3.81	0.768	-4.38	-1.6								-2.62	-1.3	-4.58	-3.45	-6.37	-7.71	-4.52	-4.89	-2.59	-7.38	-1.2	-2.22	-4.89	-9.39
-0.568	-0.254	0.423	-3.59	-0.51	-4.16	-1.87								-2.87	-0.612	-4.55	-3.52	-6.51	-7.22	-3.92	-4.71	-3.29	-6.46	-3.1	-2.94	-5.18	-9.57
-0.729	-0.606	-0.283	-3.4	-0.221	-3.85	-1.7								-2.31	-1.27	-4.61	-3.65	-6.75	-7.62	-4.16	-4.67	-2.33	-7.14	-1.77	-2.43	-5.47	-9.19
-0.673	-0.497	0.143	-3.5	0.595	-4.35	-1.31								-2.48	-1.49	-4.6	-3.17	-6.65	-7.49	-4.55	-5.08	-2.62	-7.11	-2.04	-3.08	-5.32	-8.55
-0.636	-0.608	-0.232	-4.39	1.46	-4.05	-2.27								-2.64	-2.2	-4.44	-3.6	-6.7	-7.57	-5.01	-5.31	-2.62	-6.52	-2.02	-2.19	-5.79	-7.92
-0.56	-0.333	1.25	-3.76	0.754	-4.31	-1.31								-2.52	-2.78	-4.45	-3.37	-6.97	-7.76	-5.89	-4.42	-3.7	-6.54	-2.36	-2	-5.06	-8.14
-0.617	-0.399	-1.05	-3.46	1.67	-4.1	-1.72								-2.83	-3.3	-4.25	-3.13	-6.77	-7.46	-5.03	-4.15	-3.12	-7.23	-3.1	-2.8	-4.67	-8.82
-0.699	-0.267	-0.337	-3.58	-0.0964	-3.92	-0.706								-2.77	-2.62	-4.44	-3.22	-6.23	-7.56	-4.47	-4.13	-2.71	-6.71	-1.54	-2.75	-4.89	-8.85
-0.585	-0.497	0.146	-3.12	0.186	-4.44	-1.05								-3.23	-2.67	-4.18	-2.88	-6.51	-7.73	-4.46	-4.63	-2.62	-7.68	-1.64	-1.84	-4.95	-9.33
-0.693	-0.345	-0.679	-3.9	0.731	-4.62	-1.32								-2.95	-2.13	-4.68	-2.75	-6.62	-7.32	-4.89	-4.23	-2.41	-6.95	-1.66	-2.14	-4.4	-8.7
-0.701	-0.582	0.214	-3.44	0.191	-4.79	-1.69								-3.08	-1.59	-4.63	-2.86	-6.49	-7.55	-3.9	-4.2	-2.72	-7.93	-1.21	-2.26	-5.14	-9.44
-0.703	-0.445	0.238	-3.6	1.6	-4.08	-1.6								-3.15	-1.23	-4.56	-3.11	-6.07	-7.19	-3.9	-3.59	-2.71	-7.4	-0.653	-1.78	-4.89	-9.6
-0.656	-0.721	-0.181	-3.67	1.96	-4.22	-1.72								-3.06	-2.09	-4.69	-2.42	-6.05	-7.89	-4.29	-4.44	-2.28	-6.94	-0.967	-1.23	-5.11	-9.06
-0.728	-0.602	-0.217	-3.38	0.019	-4.73	-1.71								-2.85	-1.26	-4.55	-3	-6.01	-7.77	-3.17	-4.01	-1.86	-7.05	-3.07	-2.96	-4.38	-8.17
-0.704	-0.731	-1.22	-3.45	0.19	-4.62	-1.49								-2.69	-0.912	-4.67	-2.89	-6.04	-7.76	-4.97	-4.48	-2.09	-6.98	-2.02	-1.87	-5.64	-9.18
-0.663	-0.806	-0.568	-3.31	0.354	-3.97	-1.81								-2.84	-0.297	-4.8	-3.35	-5.88	-7.76	-3.93	-3.73	-2.16	-6.77	-0.376	-2.2	-5.27	-8.93
-0.675	-0.827	-0.271	-3.57	1.4	-4.11	-1.63								-2.72	-1.25	-4.76	-2.91	-6.04	-7.48	-3.63	-4.32	-2.07	-7.71	-3.46	-1.78	-5.5	-9.08
-0.709	-0.64	0.163	-3.62	0.405	-4.37	-1.57								-3.06	-2.59	-4.98	-3.21	-6.19	-7.81	-3.5	-4.9	-2.19	-7.05	-2.55	-1.75	-5.94	-8.56
-0.807	-1.03	-0.541	-3.81	0.831	-4.96	-1.94								-3.08	-2.36	-4.63	-2.58	-5.85	-7.43	-3.78	-4.65	-2.39	-6.79	-3.01	-2.04	-5.34	-8.5
-0.727	-0.62	0.00399	-3.12	0.193	-4.37	-1.28								-3.25	-1.86	-4.82	-2.93	-5.89	-7.28	-4.65	-4.6	-2.87	-8.05	-2.52	-3.48	-5.23	-8.18
-0.835	-0.806	0.245	-3.52	0.924	-5.11	-1.52								-3.14	-1.41	-4.82	-3.46	-6.01	-7.63	-4.22	-4.64	-2.11	-7.21	-1.6	-1.91	-5.4	-8.25
-0.792	-0.428	0.166	-3.72	0.154	-4.26	-1.39								-3.19	-1.15	-4.72	-3.05	-6.18	-7.39	-2.83	-5.31	-2.47	-8.59	-2.03	-1.99	-5.09	-7.98
-0.866	-0.405	-0.174	-3.04	1.03	-4.3	-1.37								-3.09	-1.71	-4.74	-3.16	-5.56	-7.2	-3.18	-4.9	-2.56	-7.63	-2.48	-1.91	-5.81	-8.37
-0.939	-0.537	0.48	-3.5	0.468	-4.49	-1.83								-2.69	-1.99	-4.92	-3.23	-5.54	-7.18	-4.05	-4.9	-2.23	-8.2	-2.97	-1.37	-5.09	-9.12
-0.842	-0.273	0.33	-3.58	0.745	-4.82	-1.34								-2.36	-2.76	-4.8	-2.94	-5.68	-7.23	-4.17	-4.52	-2.14	-7.08	-2.76	-1.12	-4.74	-8.94
-0.778	-0.387	-0.0814	-3.83	1.03	-4.91	-1.86								-2.38	-1.82	-4.53	-3.6	-5.51	-7.63	-4.08	-4.65	-2.87	-7.06	-3.21	-2.21	-5.01	-8.24
-0.831	-0.313	-0.863	-3.51	0.531	-4.55	-1.66								-2.58	-2.86	-4.74	-3.16	-5.54	-7.59	-3.26	-4.46	-2.92	-5.88	-1.9	-1.85	-5.48	-8.83
-0.9	-0.203	0.159	-3.64	0.707	-4.71	-2.27								-2.73	-1.99	-4.75	-3.34	-5.78	-7.17	-4.81	-4.67	-2.49	-6.34	-2.18	-1.96	-5.36	-8.65
-0.802	-0.526	-0.235	-3.55	0.233	-4.15	-1.62								-2.82	-2.81	-4.5	-3.26	-5.98	-7.29	-4.27	-5.34	-3.05	-7.52	-2.5	-1.83	-5.31	-8.91
-0.815	-0.203	-0.438	-3.64	0.299	-4.45	-1.74								-2.9	-1.7	-4.5	-2.77	-5.98	-7.6	-4.69	-5.04	-2.79	-7.15	-2.73	-1.39	-4.85	-8.31
-0.72	-0.174	1.55	-3.83	-0.165	-4.96	-1.73								-2.82	-1.54	-4.49	-2.73	-5.72	-7.25	-4.26	-4.71	-3.49	-7.04	-2.32	-2.28	-5.25	-9.25
-0.77	0.0843	-0.685	-4.16	-0.0791	-4.62	-1.69								-2.93	-1.74	-4.56	-2.82	-6.02	-7.12	-3.66	-4.75	-2.93	-7.78	-1.06	-1.09	-5.27	-8.96
-0.724	-0.332	-0.642	-3.87	1.77	-4.47	-0.844								-2.88	-0.573	-4.49	-2.72	-5.67	-7.3	-4.44	-4.76	-3.06	-7.41	-2.89	-3.4	-5.02	-8.99
-0.631	-0.196	0.708	-4.3	0.696	-5.17	-0.792								-3.03	-1.56	-4.76	-2.87	-5.5	-7.48	-3.64	-4.82	-3.1	-7.65	-1.68	-2.74	-4.62	-9.11
-0.628	-0.356	0.662	-3.9	1.13	-5.08	-0.815								-2.93	-2.21	-4.49	-3.41	-5.36	-7.45	-4.9	-5.72	-3.24	-7.18	-2.67	-2.32	-5.09	-8.57
-0.676	-0.561	-0.42	-3.43	0.265	-5.09	-1.15								-2.95	-2.38	-4.61	-3.69	-5.7	-7.48	-4.2	-4.66	-3.36	-7.4	-3.43	-2.71	-4.73	-8.85
-0.686	-0.354	-0.456	-3.86	1.05	-4.89	-1.17								-2.9	-1.36	-4.67	-3.87	-5.62	-7.51	-3.21	-4.42	-3.24	-7.14	-1.74	-2.54	-4.81	-9.41
-0.629	-0.233	-0.898	-3.66	0.982	-4.76	-0.857								-2.81	-2.07	-4.68	-3.94	-5.39	-7.68	-4.1	-4.63	-3.19	-7.71	-1.84	-2.33	-5.81	-9.82
-0.795	-0.166	-0.173	-3.4	1.66	-4.81	-1.31								-2.93	-2.21	-4.69	-3.98	-5.51	-7.69	-4.49	-3.95	-2.55	-7.27	-2.04	-1.42	-5.17	-9.64
-0.677	-0.187	-1.11	-3.67	1.37	-4.43	-1.33								-2.96	-2.29	-4.67	-3.62	-5.81	-7.34	-3.79	-3.91	-1.49	-6.77	-1.26	-1.92	-5.48	-8.59
-0.689	-0.208	-0.33	-2.92	0.608	-4.25	-0.879								-2.9	-1.4	-4.51	-3.27	-6.22	-7.27	-3.36	-4.07	-1.4	-5.73	-2.66	-2.58	-4.86	-8.54
-0.621	-0.0419	-0.481	-3.84	0.659	-3.98	-0.759								-3.04	-1.88	-4.52	-3.32	-6.14	-7.05	-3.05	-4.19	-1.38	-6.68	-1.78	-2.14	-5.02	-8.99
-0.611	0.108	-1.34	-3.37	1.17	-4.72	-1.02								-3.42	-2.24	-4.31	-3.75	-5.92	-7	-2.45	-4.57	-1.3	-7.57	-1.1	-2.57	-5.17	-9.25
-0.694	0.219	-0.493	-3.73	1.78	-4.3	-0.981								-3.36	-1.6	-4.35	-4.07	-6.55	-6.98	-3.92	-4.49	-1.04	-7.43	-0.54	-2.46	-4.98	-8.71
-0.813	0.129	-0.56	-3.79	0.226	-4.43	-1.77								-2.85	-1.12	-4.54	-3.66	-6.41	-6.5	-4.69	-4.3	-0.942	-7.21	-1.54	-2.86	-5.64	-8.13
-0.729	0.0727	0.0284	-3.81	0.771	-4.81	-1.89								-3.06	-1.6	-4.63	-2.98	-6.69	-6.73	-4.11	-4.95	-1.09	-7.55	-0.883	-1.65	-5.52	-8.7
-0.743	0.319	-0.378	-2.95	0.256	-4.46	-1.11								-2.72	-2.42	-4.67	-3.43	-6.55	-7.15	-4.26	-4.7	-1.23	-6.77	-1.95	-2.62	-5.23	-9.15
-0.69	-0.12	-1.32	-3.9	-1.58	-4.31	-1.27								-3.15	-2.27	-4.5	-2.98	-6.73	-6.7	-3.58	-5.17	-0.791	-7.66	-2	-0.959	-5.73	-8.7
-0.658	-0.172	-0.565	-3.1	-0.626	-4.43	-1.92								-3.17	-3.81	-4.8	-3.01	-6.22	-6.95	-3.55	-4.63	-1.31	-7.02	-1.76	-0.889	-4.76	-8.63
-0.679	-0.0154	-0.858	-4.12	-0.491	-4.52	-1.86								-3.34	-3.1	-4.6	-2.8	-6.57	-6.78	-4.99	-4.86	-1.4	-6.8	-1.83	-1.61	-5.05	-9.48
-0.644	0.0877	-1.53	-3.55	0.832	-3.9	-1.65								-3.1	-0.869	-4.6	-3.62	-6.33	-6.52	-4.72	-5.29	-1.2	-6.41	-3.82	-2.09	-4.75	-8.82
-0.468	0.141	0.222	-4.15	-0.103	-4.39	-1.71								-3.03	-0.0539	-4.34	-3.68	-6.12	-6.72	-4.92	-5.14	-1.37	-5.56	-1.55	-1.31	-5.79	-9.43
-0.583	0.511	-0.26	-3.67	-0.00451	-4.05	-1.85								-3.02	-0.0916	-4.34	-2.79	-6.21	-6.22	-5.35	-4.4	-1.23	-6.6	-3.28	-3.28	-5.9	-8.81
-0.613	0.474	-0.731	-3.83	-0.0965	-3.75	-1.6								-3.11	-1.52	-4.39	-3.35	-6.26	-6.9	-4.15	-5.26	-1.51	-7.96	-2.01	-1.61	-5.44	-9.08
-0.669	0.747	-0.702	-3.97	0.172	-4.75	-1.55								-3.22	-2.02	-4.48	-3.74	-5.92	-6.67	-3.75	-5.21	-1.37	-6.66	-2.38	-2.98	-5.37	-8.33
-0.699	0.487	-0.168	-3.41	-0.0245	-3.95	-1.86								-3.2	-1.62	-4.51	-3.58	-6.23	-6.32	-4.13	-4.63	-1.75	-6.77	-1.32	-1.69	-4.98	-8.49
-0.707	0.373	-0.282	-3.49	0.0502	-4.16	-1.73								-3.21	-1.47	-4.32	-3.22	-5.84	-6.6	-4.06	-4.91	-1.85	-5.93	-1.71	-2.89	-5.66	-9.4
-0.811	1.01	-1.81	-4.13	-0.446	-4.38	-1.82								-3.06	-1.47	-4.62	-3.45	-5.84	-6.64	-3.79	-4.52	-1.93	-7.13	-2.22	-1.53	-5.5	-8.49
-0.537	0.841	-0.243	-4.37	1.29	-3.65	-1.3								-2.71	-1.51	-4.52	-3.44	-4.98	-6.71	-4.3	-4.38	-1.97	-6.97	-2.54	-1.34	-5.57	-7.99
-0.564	0.905	-0.806	-4.18	-0.698	-3.83	-1.25								-2.79	-0.417	-4.31	-3.26	-4.37	-6.43	-3.96	-4.1	-0.732	-7.2	-2.41	-3.58	-4.83	-7.69
-0.476	0.721	-0.482	-3.92	-0.616	-4.75	-1.13								-2.8	-1.63	-4.54	-2.92	-4.52	-6.35	-3.56	-3.88	-0.774	-8.94	-2.46	-1.83	-5.2	-7.91
-0.488	0.648	-0.417	-3.79	0.666	-3.82	-1.3								-2.62	-0.85	-4.14	-2.7	-4.5	-5.89	-3.91	-4.08	-0.42	-7.36	-2.93	-1.79	-4.95	-7.19
-0.446	1.16	-0.666	-3.87	1.11	-4.06	-1.44								-2.63	-0.976	-4.42	-3.34	-4.8	-6.19	-2.97	-4.77	-1.16	-6.9	-1.16	-2.75	-4.89	-8.75
-0.309	0.944	-0.242	-3.32	1.77	-4.17	-1.25								-2.85	-1.7	-4.41	-3.38	-5.09	-6.7	-3.79	-2.95	-1.05	-7.49	-1.69	-3.48	-5.05	-8.94
-0.359	0.79	-1.09	-3.7	0.506	-4.05	-1.91								-3.14	-2.22	-4.03	-3.43	-4.51	-5.93	-3.8	-4.89	-1.46	-8.48	-2.23	-2.03	-5.49	-8.02
-0.34	0.963	-0.441	-3.2	1.02	-4.18	-1.5								-2.75	-1.58	-3.81	-3.39	-3.19	-6.5	-3.96	-4.83	-1.56	-7.67	-3.21	-1.96	-5.12	-8.31
-0.325	1.42	-0.196	-2.97	0.343	-3.91	-2.05								-2.91	-1.39	-3.97	-4.15	-2.93	-6.41	-3.19	-4.91	-1.48	-6.6	-2.44	-3.21	-5.06	-7.87
-0.396	1.41	0.375	-3.34	0.233	-4.43	-1.71								-2.74	-1.12	-4.03	-3.18	-2.75	-6.39	-3.24	-3.96	-1.53	-7.6	-2.61	-1.13	-4.99	-7.74
-0.297	1.05	-1.22	-3.73	0.944	-3.62	-1.81								-2.98	-1.03	-4.11	-3.7	-3.14	-6.35	-3.55	-4.78	-1.26	-7.52	-1.63	-2.43	-5.45	-8.09
-0.133	0.907	-1.35	-3.85	0.144	-4.67	-1.58								-2.63	-0.0049	-4.06	-3.11	-3.04	-7.17	-2.51	-4.69	-0.87	-7.67	-0.739	-3.38	-5.42	-7.99
-0.239	0.951	-0.374	-3.12	0.108	-4.02	-1.29								-2.82	-0.149	-4.33	-3.48	-3.09	-7.12	-3.91	-3.68	-0.977	-7.63	-1.79	-2.73	-5.71	-8.02
-0.312	1.21	-0.709	-4.24	0.718	-4.08	-1.35								-2.76	-0.508	-4.46	-2.54	-3.49	-6.71	-3.78	-4.45	-0.808	-7.44	-2.41	-0.967	-5.83	-7.53
-0.37	1.01	-0.273	-2.79	0.801	-5.09	-1.15								-3.08	0.538	-4.37	-3.65	-3.99	-7.23	-4.11	-4.17	0.163	-8.1	-2	-2.72	-5.12	-8.6
-0.4	1.09	-0.094	-3.93	0.644	-4.96	-1.02								-3.07	-0.439	-4.43	-3.26	-3.79	-7.6	-4.5	-4.49	1.13	-7.15	-2.52	-2.16	-5.48	-7.73
-0.541	0.924	-0.425	-3.7	1.42	-4.16	-1.8								-3.14	0.063	-4.35	-3.27	-3.34	-5.9	-4.43	-4.26	0.881	-7.74	-2.31	-3.54	-5.32	-6.97
-0.503	1.3	-0.454	-4.25	-0.128	-4.6	-2								-3.01	-0.316	-4.41	-2.7	-4.07	-6.37	-2.36	-4.66	0.803	-7.45	-2.15	-1.13	-4.9	-7
-0.576	0.924	0.594	-3.7	-0.0931	-4.05	-1.73								-3.1	-0.369	-4.42	-2.19	-4.29	-6.25	-3.04	-3.88	0.355	-8.26	-2.62	-1.9	-5.17	-7.25
-0.436	0.696	-0.769	-3.71	1.24	-4	-0.922								-2.72	-0.356	-4.38	-2.79	-4.27	-6.83	-3.99	-5.13	0.708	-7.47	-2.95	-1.37	-5.25	-7.3
-0.55	0.604	-0.291	-3.85	1.87	-4.41	-0.992								-3.17	-0.937	-4.19	-2.8	-4.47	-6.24	-2.64	-4.15	0.142	-7.54	-1.75	-1.24	-5.37	-7.36
-0.586	0.594	-0.435	-3.31	0.944	-3.92	-1.08								-3.22	-0.549	-4.28	-2.75	-4.08	-6.82	-2.93	-4.84	-0.157	-7.49	-1.91	-1.59	-4.86	-8.45
-0.724	0.757	-0.483	-3.8	0.73	-4.07	-0.774								-3.07	-1.09	-4.34	-2.32	-4.74	-6.09	-4.23	-5.23	-0.686	-7.82	-1.53	-3.28	-5.03	-7.3
-0.782	0.216	-0.576	-3.17	0.247	-3.96	-1.15								-3.03	-1.32	-4.15	-2.93	-4.77	-5.98	-4	-4.7	-0.135	-7.36	-1.37	-2.74	-5.33	-7.09
-0.839	0.622	-0.347	-4.02	0.048	-3.95	-1.11								-2.81	-1.69	-4.29	-3.2	-4.52	-6.02	-3.75	-2.88	0.314	-7.36	-1.35	-2.24	-5.64	-7.63
-0.77	0.715	-1.77	-4.44	-0.732	-3.94	-1.17								-2.57	-1.1	-4.13	-2.83	-4.44	-5.85	-2.62	-3.47	-0.429	-7.17	-0.743	-2.94	-5.06	-7.19
-0.784	0.583	0.0472	-3.46	-0.215	-4.4	-1.88								-2.8	-1.72	-4.23	-3.05	-4.36	-5.77	-3.95	-3.34	-0.301	-7.76	-3.12	-2.36	-5.3	-7.05
-0.598	0.523	0.274	-3.36	0.437	-3.78	-1.56								-2.6	-1.78	-4.19	-3.2	-4.34	-6.28	-3.14	-3.57	0.287	-7.29	-1.99	-1.59	-4.91	-6.87
-0.739	0.383	0.495	-3.62	0.878	-3.93	-1.26								-2.59	-2.14	-4.28	-3.37	-3.97	-6.28	-3.22	-4.22	-0.132	-7.55	-1.72	-1.77	-4.9	-7.59
-0.719	0.375	-0.0433	-3.88	1.32	-4.25	-1.84								-2.87	-2.18	-4.25	-3.38	-4.08	-5.81	-3.74	-3.83	-0.0134	-7.63	-1	-3.71	-5.18	-7.73
-0.824	0.248	-1.51	-3.64	0.915	-4.74	-1.79								-2.78	-1.45	-4.49	-2.52	-4.44	-5.85	-3.31	-3.53	-0.238	-6.81	-2.47	-3.31	-4.89	-7.73
-0.714	0.292	-0.79	-3.62	0.0401	-4.88	-1.55								-2.45	-1.53	-4.17	-3.5	-3.97	-5.31	-3.35	-3.03	-0.359	-5.92	-2.09	-1.83	-5.14	-7.75
-0.776	0.21	0.0865	-3.48	-1.14	-4.63	-2.23								-2.28	-1.05	-4.17	-2.91	-4	-5.7	-2.52	-2.71	-0.426	-6.58	-1.73	-0.904	-5.37	-7.6
-0.818	0.505	-0.612	-3.19	0.928	-3.86	-1.6								-2.29	-1.95	-3.85	-3.04	-4.23	-5.9	-2.7	-3.13	-0.487	-6.5	-1.45	-1.32	-4.81	-7.88
-0.767	0.0421	-0.565	-3.8	0.898	-4.33	-1.86								-2.18	-1.97	-3.86	-2.89	-4.12	-6.17	-2.65	-3.25	-0.933	-6.29	-1.63	-0.64	-5.22	-8.23
-0.726	0.497	0.255	-3.64	-0.312	-4.97	-2.13								-2.56	-2.27	-3.92	-3.11	-3.99	-6.58	-3.34	-2.71	-0.565	-6.97	-2.5	-3.57	-5.18	-7.8
-0.834	0.313	0.296	-3.5	1.21	-4.58	-1.71								-2.7	-1.26	-4.2	-3.2	-4.46	-5.43	-3.14	-3.51	-0.75	-7	-2.59	-1.25	-5.89	-7.81
-0.908	0.322	-0.0228	-3.84	1.39	-4.46	-1.86								-2.76	-1.78	-4.31	-3	-4.45	-6.49	-3.62	-2.93	-0.458	-6.66	-3.07	-2.3	-5.05	-7.3
-0.807	0.341	0.163	-3.49	1.35	-4.58	-2.08								-2.85	-1.41	-4.32	-3.28	-4.28	-6.38	-2.99	-2.81	-0.192	-7	-2.69	-3.91	-4.49	-6.91
-0.832	0.402	-1.53	-3.7	0.445	-4.82	-1.77								-2.78	0.158	-4.32	-2.35	-4.17	-6.35	-3.35	-3.34	-0.644	-7.27	-2.2	-3.08	-4.55	-7.03
-0.754	0.442	-0.895	-4.41	0.00784	-4.36	-1.81								-2.62	-0.604	-4.21	-3	-4.32	-5.86	-3.74	-3.96	-0.263	-6.9	-1.13	-3.19	-4.21	-7.26
-0.832	0.166	-0.86	-3.92	0.405	-4.61	-1.48								-2.77	-0.93	-4.3	-2.77	-4.2	-4.99	-2.8	-3.53	-0.417	-6.47	-2.46	-2.26	-5	-7.98
-0.825	0.208	-0.0803	-4.34	-0.365	-4.42	-1.54								-2.76	-0.5	-4.38	-2.66	-4.37	-5.47	-3.24	-3.55	-0.316	-6.69	-2.15	-1.13	-5.02	-8.01
-0.778	-0.125	-0.766	-3.82	0.169	-4.35	-1.46								-2.68	-0.201	-4.68	-2.72	-4.46	-5.83	-3.38	-3.64	-0.514	-5.92	-1.51	-3.94	-4.82	-7.77
-0.785	-0.0745	-1.27	-3.93	0.509	-4.93	-1.81								-2.97	-0.733	-4.91	-2.96	-4.76	-6.47	-3.36	-3.96	-0.151	-6.46	-2.6	-1.6	-4.17	-8.1
-0.747	-0.00621	-0.0276	-4.19	0.726	-4.65	-1.65								-2.67	-0.866	-4.8	-2.66	-4.76	-5.29	-2.6	-4.44	-0.208	-7.41	-2.56	-1.91	-4.79	-7.57
-0.779	0.00699	0.593	-3.7	0.0681	-4.56	-2								-2.88	-1.64	-4.4	-2.83	-5.43	-6.23	-3.25	-3.62	-0.359	-6.83	-1.44	-2.66	-5.31	-7.91
-0.75	0.118	-0.398	-3.44	-0.262	-4.12	-2.34								-2.78	-1.73	-4.13	-2.41	-4.85	-6.12	-2.94	-5.05	-0.251	-7.14	-1.47	-3.53	-5.25	-8.32
-0.726	0.206	-1.13	-3.88	-0.333	-4.36	-1.35								-2.58	-1.61	-4.17	-2.9	-5	-5.27	-3.5	-4.99	-0.308	-6.48	-2.24	-1.96	-4.96	-8.43
-0.776	0.172	-0.499	-3.72	0.393	-4.42	-2.19								-2.81	-2.03	-4.01	-3.12	-4.85	-6.06	-2.43	-4.78	-0.839	-7.37	-1.7	-1.25	-5.67	-8.32
-0.882	0.0576	-0.328	-3.43	1.07	-4.56	-2.21								-3.02	-1.12	-4.52	-2.99	-4.91	-6.05	-3.46	-4.34	-1.07	-7.68	-2.16	-1.57	-5.38	-7.35
-0.795	-0.064	-0.414	-4.06	0.342	-4.69	-1.96								-3.29	-1.31	-4.81	-3.11	-4.51	-5.77	-3.7	-4.65	-1.02	-6.86	-1.98	-2.77	-4.91	-8.65
-0.91	0.176	-1.18	-2.93	1.45	-5.1	-1.64								-3.06	-1.73	-4.88	-3.3	-4.79	-5.84	-4.21	-4.95	-1.72	-6.39	-1.69	-2.88	-4.53	-8.42
-0.823	0.294	-0.403	-3.74	-0.044	-4.16	-2.66								-3.18	-1	-4.93	-2.71	-4.37	-6.51	-4.29	-4.41	-1.65	-7.88	-0.662	-2.61	-5.2	-8.04
-0.816	0.0615	-0.3	-3.73	-0.52	-4.19	-2.53								-3.31	-1.57	-4.95	-3.05	-4.93	-5.96	-4.15	-4.58	-0.95	-7.13	-2.2	-2.45	-5.91	-8.23
-0.627	0.372	-0.343	-3.55	-0.796	-4.44	-1.58								-3.39	-1.5	-5	-3.04	-5.23	-6.77	-3.7	-4.66	-0.904	-7.92	-1.41	-2.67	-5.57	-8.39
-0.561	0.065	0.719	-3.05	-0.251	-4.11	-1.88								-3.31	-0.401	-4.81	-3.56	-4.62	-6.77	-3.72	-4.78	-0.655	-7.24	-1.64	-1.28	-5.01	-8.06
-0.49	0.295	-0.656	-3.79	0.213	-4.14	-2.35								-3.41	-0.953	-4.25	-3.38	-4.73	-6.78	-3.37	-5.79	-1.36	-7.97	-2.21	-0.195	-4.88	-7.7
-0.565	0.0988	0.0883	-3.41	-0.362	-4.48	-2.19								-3.13	-1.23	-4.84	-3.16	-4.79	-6.43	-4.19	-4.7	-0.785	-7.33	-1.83	-1.67	-5.67	-7.35
-0.611	0.135	0.0228	-2.78	0.337	-4.16	-2.34								-2.68	-1.31	-4.81	-2.69	-5.09	-5.69	-4.59	-4.71	-1.36	-7.15	-2.57	-0.438	-5.07	-8.36
-0.527	0.0951	-0.61	-2.79	-0.319	-3.94	-2.2								-3.18	-0.856	-4.94	-3.35	-4.9	-5.27	-4.57	-4.24	-1.44	-7.84	-2.73	-1.04	-6.07	-7.92
-0.495	0.147	0.321	-3.31	0.662	-3.82	-1.97								-3.41	-0.717	-4.63	-2.97	-4.26	-5.08	-4.07	-4.37	-1.38	-7.47	-1.57	-0.916	-5.97	-8.27
-0.543	-0.0836	-0.0206	-3.09	0.109	-3.54	-1.48								-3.32	-0.251	-4.45	-2.81	-4.72	-5.54	-5.15	-5.15	-1.68	-6.48	-1.9	-0.993	-5.35	-8.17
-0.61	-0.146	-0.189	-3.5	0.464	-3.83	-1.79								-3.09	-0.234	-4.76	-3.51	-4.57	-5.75	-4.7	-4.91	-2.2	-6.82	-1.65	-1.86	-5.36	-8.09
-0.713	-0.118	-0.664	-3.56	0.0347	-3.57	-2.38								-3.24	-1.13	-4.73	-3.16	-4.49	-6.49	-5.25	-4.84	-2.65	-5.97	-2.24	-1.66	-5.91	-7.44
-0.726	-0.499	-0.402	-3.42	0.194	-4.07	-1.74								-3	-0.937	-4.98	-2.87	-4.82	-6.96	-4.7	-5.08	-2.19	-6.4	-1.05	-1.18	-5	-8.78
-0.682	-0.458	-0.624	-4	0.079	-3.7	-2.34								-3.24	-0.918	-5.22	-3.41	-4.52	-8.14	-4.25	-5.31	-2.18	-6.73	-1.67	-2.03	-4.72	-8.99
-0.692	-0.263	0.124	-3.86	0.714	-3.36	-2.19								-3.61	-0.152	-4.77	-2.82	-4.58	-6.81	-4.13	-4.92	-2.07	-6.22	-1.48	-1.82	-5.66	-8.7
-0.761	-0.448	-0.231	-3.35	0.495	-3.75	-2.32								-3.69	-0.255	-4.65	-3.24	-4.59	-6.58	-3.56	-4.96	-2.24	-6.99	-1.92	-2.06	-5.26	-8.2
-0.882	-0.306	-0.385	-4.02	0.382	-4.01	-2.11								-3.58	-0.0451	-4.86	-3.11	-4.13	-6.63	-3.87	-5.03	-2.17	-7.29	-3.46	-2.23	-5.93	-8.67
-0.71	-0.304	-0.166	-3.42	0.852	-3.65	-1.71								-3.23	-0.949	-4.94	-2.6	-3.97	-6.91	-2.73	-4.42	-1.42	-8.19	-2.24	-1.16	-5.52	-8.72
-0.885	-0.438	0.168	-3.59	1.12	-4	-1.99								-3.64	-0.381	-4.98	-2.57	-3.89	-7.05	-2.54	-3.85	-0.727	-7.41	-1.41	-0.834	-6.14	-9.1
-0.88	-0.647	0.809	-3.6	-0.585	-3.62	-2.51								-3.3	-0.577	-5.28	-1.93	-3.91	-7	-2.35	-4.23	-0.705	-8.27	-1.15	-1.18	-5.36	-7.78
-0.872	-0.721	0.903	-3	0.903	-4.33	-1.94								-3.05	-1.96	-5.22	-2.21	-4.27	-6.96	-2.26	-4.61	-1.26	-7.11	-2.86	-1.95	-6.09	-8.38
-0.922	-1.11	1.05	-3.02	-0.35	-4.46	-1.62								-3.09	-1.3	-4.87	-2.94	-4	-6.74	-2.75	-4.5	-1.36	-6.81	-1.74	-1.49	-5.97	-8.23
-0.867	-0.585	0.924	-3.34	-0.622	-3.87	-1.84								-3.21	-0.325	-5.35	-2.52	-4.37	-6.2	-2.16	-4.13	-1.09	-7.9	-1.2	0.938	-5.74	-8.16
-0.883	-0.822	0.861	-3.52	0.489	-4.38	-2.06								-3.1	-0.634	-5.1	-2.4	-4.55	-6.21	-3.4	-3.56	-0.89	-6.98	-2.14	-0.441	-5.32	-7.65
-0.803	-0.73	0.868	-3.81	0.29	-4.4	-1.8								-3.62	-1.77	-4.99	-2.54	-3.91	-6.39	-4.05	-4.84	-1.4	-7.23	-1.09	-2.11	-4.87	-8.3
-0.9	-0.976	0.0583	-4.16	0.377	-3.49	-2.03								-3.79	-1.23	-5.42	-2.82	-3.71	-6.71	-3.92	-3.87	-1.41	-7.41	-2.04	-2.38	-5.97	-8.97
-0.853	-0.955	1.5	-3.92	0.238	-3.91	-2.04								-3.79	-1.34	-5.43	-3.43	-3.91	-7.38	-3.35	-3.98	-1.91	-7.02	-1.33	-2.04	-6.19	-8.43
-0.962	-0.349	1.44	-3.7	-0.0353	-3.87	-1.97								-3.36	-1.16	-5.36	-4.08	-4.03	-6.5	-3.2	-3.1	-1.47	-6.76	-2.16	-1.07	-6.12	-7.55
-1.01	-0.255	1.4	-3.09	-0.333	-4.66	-1.72								-3.24	-1.79	-5.24	-3.44	-3.81	-7.38	-3.92	-3.31	-2.12	-7.42	-2.07	-3.22	-5.7	-7.66
-0.974	-0.627	0.726	-3.61	0.7	-4.42	-2.05								-3.27	-0.942	-5.13	-3.47	-4.47	-6.74	-3.1	-3.39	-2.49	-6.99	-2.83	-2.38	-5.43	-7.27
-0.877	-0.569	1.2	-3.7	0.291	-3.38	-1.71								-3.23	-1.48	-5.12	-3.65	-4.34	-7.5	-2.71	-2.12	-2.35	-7.19	-2.6	-1.9	-5.15	-7.7
-0.883	-0.514	1.62	-3.62	0.824	-4.64	-1.85								-3.78	-1.26	-5.17	-2.95	-4.45	-8.24	-2.9	-3.61	-3.21	-7.06	-1.86	-1.32	-5.5	-7.84
-0.843	-0.488	1.91	-3.48	-0.909	-3.7	-1.86								-3.72	-0.905	-5.16	-3	-4.3	-8.01	-3.28	-3.61	-2.99	-7.97	-1.93	-1.87	-5.43	-8.35
-0.752	-0.454	1.48	-3.29	0.148	-4.02	-2.74								-3.84	-1.71	-5.3	-2.85	-3.87	-7.71	-2.38	-3.17	-2.44	-7.18	-2.33	-1.1	-5.4	-8.27
-0.78	-0.552	1.76	-3.99	0.682	-3.43	-2.63								-3.73	-2.37	-5.13	-3.24	-4.19	-7.27	-2.44	-4.1	-1.7	-8.21	-2.43	-1.47	-5.41	-7.3
-0.831	-0.717	2.32	-3.97	0.369	-3.65	-2.45								-3.48	-2.42	-5.15	-3.33	-3.56	-6.71	-2.86	-3.51	-2.12	-6.77	-2.22	-1.38	-5.73	-7.12
-0.932	-0.729	0.272	-3.5	0.788	-4.49	-2.76								-3.35	-1.84	-5.64	-3.08	-4.07	-6.56	-4.06	-3.08	-1.88	-8.32	-1.57	-2.2	-5.07	-7.5
-0.971	-0.62	0.565	-4.23	0.418	-4.36	-1.4								-3.74	-1.35	-5.31	-3.26	-4.12	-7.26	-3.65	-3.69	-1.4	-7.64	-2.06	-2.79	-5.57	-7.92
-1.03	-0.534	1.63	-3.32	0.573	-3.73	-1.74								-3.59	-0.637	-5.36	-3.06	-4.38	-7.07	-3.72	-2.34	-2.03	-7.99	-2.06	-3.91	-5.6	-7.61
-1.04	-0.624	1.22	-4.3	0.616	-4.2	-1.83								-2.95	-1.19	-5.26	-3.24	-4.26	-6.21	-3.8	-3.51	-2.45	-7.48	-3.03	-1.4	-5.87	-7.51
-1.09	-0.822	2.66	-3.52	0.67	-3.7	-1.53								-3.11	-1.66	-4.72	-3.34	-4.21	-5.65	-3.57	-2.89	-2.34	-7.65	-1.52	-2.02	-4.66	-7.78
-1.13	-0.806	2.08	-3.2	0.7	-3.94	-1.39								-3.04	-2.16	-4.9	-3.48	-4.65	-5.66	-3.13	-4.69	-2.44	-7.43	-2.02	-1.74	-4.91	-7.14
-1.14	-0.35	2.37	-3.11	0.798	-2.97	-1.76								-3.61	-0.775	-5.24	-3.23	-4.35	-4.9	-3.82	-4.29	-1.82	-6.6	-1.67	-0.512	-5.13	-7.4
-1.16	-0.525	1.31	-3.5	-0.327	-2.74	-1.82								-3.54	-1.75	-5.24	-3.22	-4.54	-5.41	-4.44	-3.97	-2.03	-6.37	-0.737	-1.69	-5.63	-7.87
-1.14	-0.842	1.06	-3.07	0.608	-3.74	-1.86								-2.98	-1.77	-5.3	-3.16	-5.01	-5.58	-4.04	-3.53	-2.38	-6.53	-1.89	-1.67	-6.03	-8.62
-1.2	-1.01	0.714	-3.39	1.25	-3.19	-1.47								-3.21	-1.84	-5.03	-3.31	-4.93	-6.18	-3.49	-3.32	-2.78	-6.31	-2.04	-1.45	-5.53	-8.64
-1.17	-0.696	0.306	-3.41	0.454	-3.56	-2.2								-3	-1.44	-4.64	-3.54	-4.49	-6.46	-3.89	-3.61	-3.08	-6.59	-1.61	-2	-5.08	-8.52
-1.28	-1.02	1.65	-3.78	0.245	-2.81	-1.95								-2.65	-1.75	-5.04	-3.26	-4.18	-6.59	-3.96	-2.79	-3.82	-6.75	-2.04	-2.12	-5.25	-8.55
-1.18	-0.918	0.668	-3.75	0.3	-2.28	-2.27								-2.74	-1.13	-5.17	-3.19	-4.59	-6.33	-4.18	-1.98	-3.01	-6.57	-2.35	-2.06	-5.53	-8.16
-1.11	-0.902	1.12	-3.77	-0.656	-2.81	-2.2								-2.82	-1.11	-5.21	-2.96	-4.45	-6.04	-3.66	-2.28	-2.26	-6.23	-2.51	-1.13	-4.95	-8.48
-1.2	-1.13	0.354	-3.54	1.24	-2.57	-1.51								-3.1	-1.33	-5.42	-2.74	-4.37	-6.69	-3.83	-2.48	-2.63	-6.41	-1.29	-1.64	-5.24	-8.61
-1.23	-0.813	1.03	-3.56	0.0879	-2.49	-1.82								-2.77	-1.22	-5.77	-2.87	-4.6	-6.91	-3.61	-3.27	-2.27	-7.29	-2	-0.983	-5.61	-8.52
-1.23	-0.989	0.664	-3.29	1.12	-2.49	-1.83								-2.75	-1.91	-5.36	-3	-4.04	-6.63	-4.11	-3.29	-2.34	-7.66	-0.448	-2.96	-5.62	-7.43
-1.22	-0.905	0.414	-3.32	-0.055	-2.94	-1.65								-3.01	-0.885	-5.39	-2.63	-4.27	-6.56	-3.98	-3.07	-2.45	-5.96	-1.33	-2.14	-5.04	-8.47
-1.21	-0.945	0.352	-3.81	1.32	-2.08	-2.06								-3.14	-0.892	-4.8	-2.72	-4.45	-6.7	-3.8	-1.97	-2.63	-6.7	-1.8	-1.83	-4.89	-8.7
-1.21	-0.906	1.65	-3.3	0.539	-2.14	-1.2								-2.64	-0.749	-4.72	-3.11	-4.21	-6.81	-3.33	-2.76	-2.59	-6.18	-2.45	-1.78	-5.29	-8.21
-1.17	-0.486	-0.0773	-3.28	-0.507	-2.72	-1.2								-2.51	-1.18	-4.97	-3.57	-4.35	-6.9	-3.19	-2.36	-2.66	-6.47	-3.16	-1.39	-5.33	-8.09
-1.08	-0.412	0.653	-4.02	-0.316	-2.34	-1.07								-3.13	-0.653	-4.68	-3.67	-4.68	-6	-2.65	-1.61	-2.24	-6.94	-2.17	-1.75	-4.75	-7.89
-1.2	-0.599	1.15	-4.31	0.653	-2.98	-1.35								-3.12	-0.949	-4.28	-3.34	-4.75	-5.3	-3.07	-2.47	-2.89	-5.93	-0.416	-1.18	-5.5	-9.39
-1.19	-0.551	0.995	-4.19	1.76	-2.87	-1.18								-3	-2.02	-4.31	-3.56	-4.23	-6.04	-3.13	-2.24	-3.04	-5.92	-1.49	-1.63	-5.43	-8.8
-1.23	-0.739	-0.464	-3.72	1.15	-2.63	-0.864								-2.79	-1.61	-4.22	-2.88	-4.17	-7.45	-3.52	-3.21	-2.7	-6.87	-3.03	-2.33	-5.23	-8.36
-1.13	-0.814	-0.354	-3.85	0.863	-1.45	-1.43								-2.69	-2.46	-4.49	-2.61	-4.37	-7.52	-3.12	-2.07	-2.19	-6.2	-1.16	-2.11	-4.77	-8.11
-0.989	-0.683	0.698	-3.53	-0.605	-0.983	-1.03								-3.14	-3.21	-4.49	-2.79	-4.69	-6.38	-3.21	-3.44	-2.19	-6.39	-2.37	-1.87	-4.69	-7.9
-0.844	-0.736	0.76	-3.79	0.171	-1.74	-1.09								-3.19	-2.43	-4.53	-2.9	-4.29	-6.15	-2.36	-3.9	-1.87	-6.34	-1.32	-0.669	-4.23	-8.3
-0.929	-0.76	-0.703	-3.83	1.19	-1.36	-0.92								-3.4	-2.23	-4.53	-2.38	-4.66	-6.1	-2.98	-2.92	-2.22	-6.39	-2.04	-0.455	-4.29	-8.34
-0.697	-1.03	0.435	-3.46	1.24	-1.42	-1.19								-3.22	-1.35	-4.35	-2.06	-4.84	-6.03	-3.08	-2.95	-2.18	-7.2	-2.43	-1.69	-4.76	-7.82
-0.715	-0.983	1.1	-3.08	-0.686	-1.51	-1.27								-3.61	-1.09	-4.53	-2.28	-4.35	-6.45	-3.25	-2.73	-2.68	-6.97	-2.13	-1.85	-4.65	-8.09
-0.747	-0.69	0.592	-3.33	-0.0801	-2.4	-0.841								-3.47	-2	-4.57	-2.09	-4.41	-6.19	-4.03	-1.96	-2.33	-7.06	-1.87	-2.07	-4.41	-8.18
-0.672	-0.579	-0.458	-3.45	0.05	-1.7	-0.973								-3.41	-1.65	-4.4	-2.23	-4.24	-6.02	-4.93	-2.16	-3.02	-6.24	-3.3	-1.59	-4.53	-8.01
-0.815	-0.476	-1.17	-3.7	-0.609	-3.2	-1.06								-2.86	-2.36	-4.32	-2.6	-4.41	-5.79	-4.99	-2.38	-2.38	-7.1	-2	-1.98	-4.22	-7.91
-0.757	-0.757	-0.469	-3.77	0.436	-2.65	-0.974								-2.89	-2.24	-4.06	-2.39	-4.38	-5.7	-3.69	-2.68	-2.4	-6.8	-0.55	-1.47	-3.93	-8.04
-0.745	-0.247	-1.57	-3.36	-0.287	-2.45	-1.59								-2.85	-2.42	-3.87	-2.85	-4.24	-5.85	-4.52	-2.7	-2.48	-6.78	-1.77	-2.41	-4.33	-8.06
-0.691	-0.472	-1.83	-3.72	0.032	-1.91	-1.5								-3.06	-3.13	-4.02	-2.78	-4.38	-5.13	-2.35	-2.21	-2.36	-6.44	-1.04	-1.97	-3.58	-7.7
-0.717	-0.18	-0.751	-4.12	1.36	-1.75	-1.08								-2.99	-2.97	-3.91	-2.91	-4.37	-6.43	-3.04	-3.36	-2.18	-6.99	-1.63	-1.08	-3.63	-7.44
-0.815	0.545	-0.932	-4.19	0.831	-2.47	-1.66								-2.94	-1.61	-4.08	-2.57	-4.35	-6.77	-3.27	-2.92	-2.17	-6.64	-2.31	-0.274	-3.72	-7.94
-0.846	0.00403	-0.036	-3.51	0.939	-2.46	-1.04								-2.52	-0.534	-4.44	-3.63	-4.38	-6.61	-3.85	-1.74	-2.51	-6.7	-2.12	-0.284	-4.01	-8.86
-0.849	0.173	-0.481	-3.64	2.37	-1.97	-1.1								-2.78	-1.79	-4.56	-3.63	-4.67	-6.01	-3.26	-2.07	-2.56	-6.57	-2.61	-0.77	-3.45	-8.12
-0.867	0.049	-0.819	-4.27	-0.0527	-2.57	-1.33								-2.88	-0.374	-4.42	-2.51	-4.95	-5.59	-2.82	-2.67	-2.09	-6.36	-2.63	-1.28	-3.72	-7.76
-0.798	0.135	-0.885	-3.29	0.0909	-2.33	-1.03								-3.31	-1.21	-4.92	-3.04	-4.95	-6.09	-3.13	-2.74	-2.49	-6.24	-3.92	-1.02	-4.09	-7.7
-0.842	0.0455	-1.4	-3.52	0.853	-3.12	-0.752								-3.13	-2.57	-4.87	-2.83	-4.76	-5.78	-2.99	-2.13	-2.69	-6.04	-2.01	-1.86	-4.27	-7.63
-0.71	0.0815	-1.1	-3.93	0.0708	-2.93	-1.03								-2.8	-2.18	-4.77	-2.7	-4.28	-6.27	-4.09	-2.83	-2.54	-6.82	-2.31	-1.02	-4.05	-7.75
-0.411	0.00238	-1.17	-4.16	0.914	-2.84	-1.06								-3.01	-1.18	-4.7	-2.37	-3.8	-6.56	-3.68	-2.05	-2.36	-6.7	-1.48	-1.59	-4.63	-7.56
-0.505	-0.0233	-0.821	-3.9	1.07	-2.55	-0.5								-3.17	-1.49	-4.75	-2.37	-3.74	-6.68	-4.04	-2.3	-2.31	-5.52	-2.85	-2.06	-3.77	-7.73
-0.517	0.0875	-0.0814	-3.55	0.15	-2.41	-0.537								-2.93	-1.46	-4.26	-2.49	-3.78	-6.66	-4.1	-2.62	-2.46	-5.78	-2.59	-1.16	-4.3	-8
-0.568	0.372	-0.636	-4.19	0.000752	-2.54	-0.654								-2.82	-1.21	-3.73	-2.51	-4.24	-6.12	-3.64	-2.78	-2.33	-5.75	-2.68	-0.456	-3.87	-8.61
-0.536	-0.056	-1.04	-3.93	1.33	-3.44	-1.48								-2.29	-1.5	-3.9	-2.48	-4.41	-6.35	-3.75	-1.26	-1.23	-5.66	-3.1	-1.52	-2.73	-7.65
-0.419	0.0699	-0.427	-4.13	0.437	-2.63	-1.11								-2.36	-2.03	-3.88	-2.16	-4.28	-5.56	-3.5	-1.63	-1.8	-6.27	-2.52	-1.71	-2.77	-7.96
-0.505	0.0266	0.348	-3.78	0.848	-3.03	-1.11								-2.67	-1.55	-3.66	-2.4	-4.74	-5.82	-4.26	-2.56	-2.23	-7.25	-1.96	-0.465	-2.65	-7.29
-0.503	0.22	-1.11	-3.66	-0.0134	-3.23	-1.24								-2.95	-0.467	-3.58	-1.56	-4.71	-6.14	-3.5	-2	-2.2	-5.99	-2.32	-1.86	-2.39	-7.18
-0.641	0.0103	-1.38	-4.23	0.386	-3.52	-1.49								-3.3	-1.31	-3.62	-2.02	-4.28	-6.47	-3.74	-2.45	-2.4	-6.69	-1.76	-2.99	-3.1	-6.75
-0.743	0.193	0.131	-3.71	0.397	-3.73	-0.444								-3.22	-1.35	-3.72	-2.29	-4.26	-5.81	-3.29	-1.15	-2.51	-6.87	-2.61	-0.0665	-2.8	-7.19
-0.796	-0.0816	-1.07	-4.09	0.651	-4.23	-0.892								-2.9	-2.25	-3.78	-2.71	-4.31	-5.28	-3.85	-1.69	-2.71	-7.6	-3.05	-1.2	-3.18	-7.09
-0.813	0.171	-0.0657	-3.35	-0.339	-3.11	-0.211								-2.46	-1.61	-3.98	-2.79	-3.8	-6.19	-2.61	-2.24	-2.56	-7.12	-1.63	0.136	-3.51	-7.15
-0.768	0.973	-0.566	-3.64	0.115	-2.46	-0.703								-2.3	-1.43	-3.7	-2.75	-3.69	-6.02	-3.06	-1.83	-2.44	-7.12	-1.99	-2.06	-3.62	-7.25
-0.753	1.11	-0.633	-3.16	-0.514	-3.64	-0.569								-2.22	-1.21	-3.93	-2.5	-3.58	-6.02	-3.79	-1.72	-2.86	-7.7	-2.28	-1.43	-3.97	-7.1
-0.795	0.533	-1.08	-3.75	0.0435	-3.15	-1.01								-1.99	-1.19	-3.82	-2.68	-3.77	-5.65	-3.97	-2.19	-2.51	-7.1	-1.75	-1.65	-3.87	-7.39
-0.678	0.844	-0.845	-3.47	-0.113	-3.16	-0.472								-2.4	-2.08	-3.78	-2.98	-4.1	-5.7	-3.69	-2.33	-2.47	-7.17	-0.903	-2.6	-3.99	-7.99
-0.449	0.717	-1.35	-3.82	-1.38	-3.36	-0.169								-2.47	-1.39	-4.14	-2.77	-4.22	-5.47	-3.08	-1.94	-2.78	-6.68	-1	-1.79	-4.37	-7.16
-0.492	0.451	-0.261	-3.54	0.199	-3.23	-0.363								-2.37	-1.19	-4.21	-2.85	-4.24	-4.99	-3.67	-2.01	-2.75	-7	-1.64	-0.935	-4.15	-5.94
-0.422	0.492	-0.992	-4.01	0.543	-3.35	-0.636								-2.44	-1.55	-4.28	-2.29	-3.67	-4.96	-2.85	-1.43	-2.66	-7.72	-2.34	-1.82	-4.44	-6.36
-0.524	0.835	-0.861	-2.69	0.552	-2.99	-0.658								-2.48	-1.89	-3.94	-2.02	-4.11	-5.24	-2.91	-1.01	-2.47	-7.33	-2.63	-2.24	-4.17	-5.14
-0.551	0.586	-1.76	-3.35	-0.404	-2.84	0.231								-2.37	-2.22	-3.72	-2.84	-3.91	-5.29	-3.33	-0.873	-2.23	-6.81	-2.73	-1.77	-3.36	-5.41
-0.522	0.527	-2	-3.3	0.678	-3.32	-0.143								-2.23	-2.22	-3.6	-3.29	-3.74	-5.32	-2.45	-2.27	-1.83	-5.92	-3.88	-0.215	-2.33	-5.03
-0.557	0.542	-1.6	-3.26	-0.361	-3.04	-0.208								-2.49	-1.15	-3.67	-3.22	-4.04	-5.44	-3.28	-1.96	-1.64	-6.54	-3.13	-0.704	-2.04	-5.17
-0.586	0.213	-0.14	-4.06	0.667	-3.33	-0.351								-2.52	-1.27	-3.51	-3.02	-3.97	-5.91	-2.93	-1.86	-1.43	-5.75	-0.722	-1.61	-1.81	-5.5
-0.573	0.459	-0.73	-3.82	-0.492	-2.87	-0.166								-2.44	-1.71	-3.62	-2.93	-4.15	-5.15	-3.73	-2.38	-2.03	-5	-1.26	-1.97	-2.32	-5.91
-0.611	0.425	-1.05	-3.99	1.29	-3.39	-0.129								-2.1	-1.32	-3.34	-3.31	-3.57	-5.04	-3.29	-2.94	-2.12	-5.84	-1.27	-1.47	-2.73	-6.06
-0.611	0.19	-1.91	-4.12	-0.695	-2.98	0.0797								-2.31	-2	-3.33	-3.18	-3.57	-4.96	-3.28	-2.08	-1.76	-6.29	-0.61	-0.181	-3.44	-5.99
-0.593	0.444	-1.75	-3.77	0.459	-3.44	-0.0581								-2.82	-2.28	-3.33	-3.43	-3.38	-5.1	-3.33	-2.33	-0.888	-6.56	-2.45	-0.823	-2.27	-6.88
-0.462	0.454	-1.14	-4.23	-0.362	-3.34	0.467								-2.41	-2.03	-3.73	-3.27	-3.93	-5.17	-3.96	-2.73	-0.844	-7.3	-1.29	-0.911	-2.39	-7.66
-0.54	0.272	0.869	-4.38	0.801	-3.54	0.122								-2.54	-1.29	-3.52	-3.54	-3.57	-5.17	-3.77	-2.83	-0.746	-6.43	-1.03	-1.55	-2.43	-7.41
-0.646	0.0758	-0.795	-3.49	-0.911	-3.79	0.0379								-2.98	-0.96	-3.63	-3.09	-3.33	-4.99	-3.12	-1.88	-1.1	-6.54	-1.99	-2.06	-2.32	-6.93
-0.596	0.0155	-0.105	-3.97	0.334	-3.99	0.25								-2.65	-0.438	-3.52	-3.27	-3.28	-4.8	-3.75	-1.68	-1.62	-6.18	-1.41	-2.5	-2.43	-8.01
-0.628	0.169	-0.351	-4.01	0.23	-3.62	0.713								-2.95	-1.36	-3.52	-2.47	-3.59	-4.84	-2.88	-2.52	-1.5	-6.51	-0.944	-1.94	-2.56	-8.23
-0.636	0.127	-0.692	-3.79	-0.14	-3.29	-0.0255								-2.98	-2.23	-3.56	-2.68	-3.25	-4.37	-3.25	-2.47	-1.71	-6.59	-1.41	-2.1	-2.01	-7.77
-0.557	0.221	-0.222	-3.48	0.965	-3.26	0.531								-2.91	-2.45	-3.5	-2.59	-3.51	-4.58	-2.14	-2.95	-2.29	-6.8	-2.12	-1.9	-2.17	-7.97
-0.698	0.0454	-1.04	-3.99	-0.158	-2.97	0.324								-2.69	-2.37	-2.9	-2.94	-3.6	-4.28	-2.63	-1.24	-2.49	-6.84	-2.04	-2.2	-1.71	-7.54
-0.602	-0.0687	-1.02	-3.53	0.427	-3.4	0.505								-2.84	-1.53	-3.45	-2.83	-3.32	-4.95	-2.95	-2.62	-2	-6.52	-3	-0.733	-1.94	-6.87
-0.724	-0.167	0.265	-4.11	0.103	-2.9	0.307								-2.93	-1.86	-3.21	-3.03	-3.3	-4.83	-2.39	-2.42	-1.69	-7.49	-3.14	-1.63	-3.18	-7.55
-0.677	-0.0573	-1.13	-4.2	-0.763	-3.35	0.761								-2.78	-1.65	-2.98	-2.9	-3.9	-5.53	-3.13	-2.32	-1.97	-7.69	-1.72	-1.8	-3.28	-7.12
-0.654	1.14	-0.196	-3.55	0.467	-2.65	0.231								-2.85	-1.15	-3.37	-2.45	-3.47	-5.37	-3.19	-2.71	-2.02	-7.69	-2.49	-2.17	-3.47	-6.39
-0.736	0.102	0.632	-3.85	0.836	-3.3	0.164								-3.09	-0.667	-3.44	-2.62	-3.33	-5.17	-3.84	-3.03	-2.49	-7.14	-0.703	-1.17	-3.59	-6.52
-0.759	0.128	-1.23	-4.52	-0.298	-3.48	1.27								-3.17	-0.214	-3.4	-2.89	-3.35	-5.15	-3.91	-2.57	-2.48	-7.68	-1.83	-2.46	-3.37	-6.09
-0.792	0.278	-0.863	-3.98	0.0353	-3.23	0.671								-3.4	0.323	-3.3	-2.74	-3.11	-5.4	-3.53	-3.34	-1.75	-8.08	-0.879	-1.66	-2.69	-5.93
-0.848	0.444	0.309	-3.96	0.366	-2.24	0.437								-3.43	-0.0801	-3.45	-2.11	-3.69	-4.81	-3.81	-3.23	-1.86	-7.13	-1.66	-1.84	-3.35	-6.48
-0.893	0.115	-0.883	-3.72	-0.378	-1.95	0.878								-2.8	0.0877	-3.27	-2.6	-3.69	-4.43	-3.71	-2.98	-1.96	-6.97	-2.61	-0.586	-3.07	-6.28
-0.878	-0.0862	-0.379	-3.43	-0.538	-1.94	0.659								-2.64	0.676	-3.38	-2.61	-2.83	-3.61	-2.96	-2.77	-2.25	-6.68	-1.28	-1.75	-3.65	-6.94
-0.864	0.0496	0.286	-3.45	-0.887	-2.16	0.17								-2.84	0.343	-3.33	-2.1	-2.85	-4	-3.18	-2.76	-1.75	-6.45	-2.25	-1.72	-3.79	-7.3
-0.89	0.133	-1.27	-3.76	0.715	-1.74	1.35								-3.1	-0.27	-3.56	-2.68	-3.16	-4.62	-3.38	-2.03	-1.71	-6.15	-2.05	-0.173	-2.98	-6.44
-0.933	0.168	-0.272	-3.58	-0.444	-2.39	1.11								-3.1	-0.326	-3.38	-2.62	-2.99	-4.8	-3.92	-1.71	-2.07	-6.77	-1.58	-1.97	-2.99	-5.77
-0.876	0.0696	-0.429	-3.76	1.43	-2.31	0.787								-3.26	-0.375	-3.36	-2.82	-3.24	-4.22	-3.48	-1.66	-2.14	-6.83	-0.905	-2.02	-3.23	-5.93
-0.899	0.134	-0.74	-3.05	0.762	-2.95	1.56								-3.04	-0.658	-3.28	-2.6	-3.55	-4.4	-2.64	-1.6	-1.77	-7.35	-1.89	-1.32	-3.97	-6.1
-0.952	-0.0587	-1.01	-3.69	0.0592	-3.03	1.25								-2.77	-0.218	-3.38	-2.12	-3.23	-4.3	-3.07	-2.98	-1.75	-5.87	-1.94	-1.73	-4.14	-6.18
-0.945	-0.132	-0.36	-2.85	-0.0148	-2.53	1.54								-2.8	0.218	-3.31	-2.78	-3.37	-4.27	-4.07	-2.64	-1.46	-6.88	-1.96	-1.97	-4.28	-6.19
-0.994	0.0455	-1.8	-3.26	0.857	-2.23	0.985								-3.05	0.119	-3.39	-2.5	-2.91	-3.72	-4.01	-2.96	-1.26	-7	-0.972	-2.6	-4.07	-6.89
-0.995	0.122	-0.444	-2.99	0.277	-2.7	0.952								-2.73	0.165	-2.9	-2.57	-3.2	-4.05	-2.83	-3.45	-1.39	-7.55	-1.61	-1.29	-4.08	-7.04
-0.967	-0.202	0.142	-3.16	0.395	-2.52	0.964								-2.4	-0.11	-2.92	-2.26	-3.3	-4.27	-3.57	-3.38	-1.58	-7.7	-1.15	-0.644	-4.48	-7.08
-0.923	0.121	0.244	-2.85	0.0454	-1.98	1.31								-2.66	-0.569	-2.89	-2.32	-3.23	-4.01	-2.67	-3.58	-1.52	-7.66	-2.55	-0.88	-3.59	-5.99
-0.906	0.115	-0.57	-3.09	-0.366	-1.94	0.884								-2.51	0.0335	-2.89	-2.02	-3.73	-4.51	-3.03	-2.5	-0.966	-7.65	-0.975	-0.742	-3.86	-6.25
-0.971	-0.0542	-0.484	-2.97	0.4	-2.49	1.77								-2.2	0.339	-2.94	-2.42	-3.42	-4.79	-2.13	-1.43	-0.677	-7.22	-1.6	-0.753	-4.08	-5.84
-0.949	0.0395	-1.34	-2.8	0.797	-2.53	0.528								-2.45	0.394	-2.89	-3.29	-3.29	-4.99	-3.34	-1.96	-0.823	-6.82	-2.05	-1.66	-4.9	-6.53
-1.03	0.855	-1.56	-2.89	-0.782	-2.63	1.79								-2.46	-0.683	-3.15	-3.56	-3.31	-4.45	-2.49	-1.37	-1.02	-6.62	-1.74	-2.57	-4.78	-8.08
-1.03	0.554	-0.456	-3.06	0.044	-2.41	1.54								-2.15	-0.959	-3.02	-2.31	-3.39	-4.36	-3.72	-1.65	-1.26	-6.54	-1.75	-2.23	-4.19	-7.47
-0.992	0.178	-0.474	-3.49	0.603	-2.27	2.06								-2.3	-1.02	-3.4	-2.18	-3.74	-4.35	-4.13	-2.61	-1.1	-7.11	-3.16	-1.7	-4.36	-6.1
-0.909	0.487	-1.12	-3.55	-0.439	-3.48	2.27								-2.38	-0.993	-3.25	-2.67	-3.6	-4.89	-2.89	-1.51	-0.793	-5.88	-2.52	-0.884	-4.26	-6.21
-0.894	0.682	-1.13	-3.21	0.0341	-2.43	1.16								-1.99	-0.985	-2.95	-2.05	-4.1	-4.38	-3.86	-2.32	-1.12	-6.8	-1.98	-1.01	-4.32	-6.7
-0.996	0.438	-1.03	-3.99	0.0142	-2.18	2.51								-2.16	-0.986	-3.37	-2.37	-4.02	-5.41	-3.37	-1.13	-1.02	-6.01	-3.38	-1.42	-3.53	-6.73
-0.813	0.525	-0.196	-3.01	0.139	-2.85	0.917								-2.55	-0.849	-3.59	-2.54	-4.33	-5.39	-3.63	-2.68	-1.18	-6	-3.06	-2.12	-4.46	-7.14
-0.85	0.195	-1	-3.2	-0.303	-2.84	1.54								-2.59	-0.439	-3.76	-2.64	-4.25	-5.07	-4.14	-2.06	-1.34	-6.9	-2.57	-2.73	-3.78	-6.72
-0.767	0.389	-1.44	-3.07	0.944	-2.36	2.2								-2.45	-0.0919	-3.17	-2.73	-3.63	-4.94	-4.23	-2.18	-1.85	-7.19	-1.24	-2.41	-3.59	-5.88
-0.791	0.0658	-0.0133	-3	0.197	-2.55	1.48								-2.97	-0.83	-3.29	-1.96	-3.22	-5.62	-2.96	-2.27	-2	-7.73	-2.2	-1.44	-4.04	-6.58
-0.752	0.359	-1.18	-2.28	0.561	-2.94	1.65								-2.77	-0.968	-3.5	-2.27	-2.93	-4.5	-2.7	-1.42	-1.55	-6.94	-2.68	-1.97	-4.5	-7.16
-0.691	0.632	-0.0813	-2.53	0.598	-2.19	2.17								-3.01	-0.822	-3.3	-2.3	-3.01	-5.06	-2.39	-1.66	-1.49	-6.83	-2.49	-1.45	-4.52	-7.2
-0.636	0.57	-0.618	-3.05	0.369	-3.26	1.9								-2.71	-0.272	-3.28	-2	-3.01	-5.31	-3.92	-2.39	-1.71	-6.56	-2.02	-2.03	-4.67	-6.37
-0.694	1.92	-1.06	-2.81	0.149	-3.66	1.62								-2.62	-1.51	-3.24	-1.58	-3.05	-5.7	-3.2	-3.09	-1.74	-6.53	-2.59	-2.28	-4.66	-6.42
-0.861	1.17	1.22	-2.59	-0.347	-2.76	2.35								-2.98	-0.966	-3.18	-2.01	-3.21	-5.3	-2.77	-2.58	-1.55	-6.89	-2.56	-2.4	-4.7	-5.7
-0.91	1.48	0.701	-2.46	0.0803	-3.81	2.03								-2.87	-1.07	-3.52	-2.16	-3.54	-4.85	-3.38	-2.7	-1.64	-7.06	-2	-3.47	-4.75	-5.89
-0.992	1.14	-1.04	-3.29	-0.697	-3.23	1.98								-2.89	-1.08	-3.37	-2.76	-3.16	-4.72	-2.35	-2.44	-1.79	-5.61	-1.11	-3.34	-4.99	-6.47
-0.97	1.64	0.388	-2.47	-0.989	-3.29	2.86								-2.95	-0.335	-3.65	-2.38	-3.52	-5.12	-3.06	-2	-2.02	-6.43	-1.28	-3.38	-4.73	-7.34
-0.913	1.56	-0.119	-2.85	-0.974	-2.64	3.06								-3.18	-1.33	-3.54	-1.96	-3.35	-5.11	-3.42	-1.42	-2.1	-6.59	-1.58	-0.876	-4.16	-6.29
-0.902	1.7	0.157	-3.26	0.507	-3.08	2.38								-3.25	-1.69	-3.52	-1.66	-3.41	-4.68	-3.6	-2.27	-1.59	-6.17	-3.43	-1.38	-4.01	-6.39
-0.883	1.42	-0.527	-2.8	0.661	-2.97	2.93								-3.38	-1.96	-3.57	-1.71	-3.37	-4.65	-3.15	-2.71	-1.54	-5.23	-3.25	-1.44	-4.45	-7.53
-0.809	1.81	-0.928	-2.77	1.22	-2.41	2.97								-3.24	-1.79	-3.72	-1.95	-4.2	-4.5	-3.88	-2.76	-1.49	-6.24	-2.53	-1.7	-4.61	-7.6
-0.897	2.27	0.774	-2.4	0.945	-2.81	2.2								-3.11	-0.606	-3.48	-1.81	-4.38	-4.48	-3.19	-3.15	-1.5	-6.51	-3.63	-3.57	-5.62	-7.03
-0.878	2.19	0.0171	-2.09	-0.971	-3.15	1.84								-3.37	-0.683	-3.71	-1.8	-4.27	-3.97	-3.73	-2.86	-1.45	-6.26	-1.69	-2.52	-5.23	-7.05
-0.901	2.34	-0.861	-1.97	-0.0288	-3.02	1.8								-2.86	-1.36	-4.12	-2.24	-4.51	-3.79	-3.25	-3.68	-1.93	-6.84	0.211	-3.04	-5.76	-6.45
-0.903	2.18	-0.651	-2.37	-0.266	-2.42	2.05								-3.26	-1.36	-3.58	-2.2	-4.63	-4.37	-3.01	-4.2	-2.16	-6.9	-1.09	-2.7	-4.49	-6.01
-0.925	1.99	0.0419	-3.52	0.608	-3	1.41								-2.9	-1.77	-3.48	-2.83	-3.92	-4.62	-4.76	-3.75	-1.97	-5.62	-2.55	-1.57	-4.58	-6.39
-0.978	2.27	0.281	-2.47	-0.351	-3.22	1.64								-3.02	-2.18	-3.08	-1.98	-4.25	-4.4	-3.74	-3.54	-1.52	-5.81	-3.61	-1.24	-4.34	-6.53
-0.87	1.75	-0.512	-2.09	-0.885	-3.58	1.48								-2.8	-1.59	-2.77	-2.14	-4.08	-4.02	-3.46	-3.09	-1.94	-6.14	-2.46	-2.58	-3.05	-7.05
-0.907	1.94	1.02	-1.62	-0.424	-2.33	1.41								-3.06	-1.12	-2.78	-3.23	-3.85	-3.71	-3.62	-2.52	-2.18	-6.62	-0.506	-2.99	-3.64	-7.74
-0.815	2.88	-0.119	-2.43	0.206	-2.52	1.6								-2.82	-1.06	-2.93	-2.61	-4.29	-3.55	-3.34	-3.4	-2.63	-5.25	-1.49	-1.63	-3.26	-7.6
-0.802	2.54	-0.215	-1.65	-0.147	-2.99	0.839								-2.4	-0.0684	-3.02	-2.46	-4.52	-3.37	-3.29	-2.98	-1.91	-5.74	0.01	-1.82	-3.4	-6.69
-0.812	1.79	0.769	-2.03	-0.0479	-2.5	0.694								-2.15	-0.482	-3.3	-2.69	-5	-4.48	-3.37	-3.54	-2.34	-6.35	-0.257	-1.99	-3.91	-7.25
-0.867	1.79	1.28	-1.84	0.304	-2.61	1.26								-2.21	-0.533	-3.14	-2.53	-4.91	-4.9	-2.65	-4.49	-2.06	-5.72	-0.48	-1.06	-3.79	-6.14
-0.828	1.99	-0.398	-1.94	0.688	-2.65	0.976								-2.49	-1.11	-3.15	-2.8	-4.13	-4.9	-3.38	-3.5	-2.07	-6.22	-0.69	-1.4	-3.71	-5.33
-0.867	1.93	-0.125	-1.21	0.647	-1.98	1.1								-2.34	-1.23	-3.1	-2.25	-3.5	-4.51	-3.61	-4.83	-1.63	-6.93	-1.69	-2.03	-4.09	-5.65
-0.822	2.05	0.556	-2.19	0.392	-1.08	0.937								-2.26	-1.9	-3.24	-2.14	-3.43	-4.43	-3.56	-4.52	-1.36	-7.45	-0.623	-1.67	-4.53	-6.24
-0.875	1.93	0.111	-2.33	0.848	-1.14	0.804								-2.53	-0.716	-3.46	-3.01	-3.91	-4.46	-4.16	-3.86	-1.77	-6.56	-0.359	-0.71	-4.69	-6.32
-0.784	1.59	1.61	-2.08	-0.837	-1.32	0.371								-2.48	-1.35	-3.34	-3.03	-3.85	-3.96	-4.03	-3.89	-2.11	-7.41	-0.319	-1.73	-3.49	-6.27
-0.81	1.77	0.376	-3.08	-0.0828	-1.89	0.615								-2.21	-0.995	-3.54	-3.15	-3.92	-4.56	-4.25	-4.51	-1.65	-7.71	-2.67	-0.816	-4.01	-6.56
-0.782	1.52	0.49	-1.87	0.155	-1.71	1.29								-2.26	-1.31	-3.58	-3.01	-3.82	-4.34	-2.8	-4.65	-1.94	-7	-2.64	0.0967	-4.35	-6.81
-0.664	1.58	-1.23	-2	0.0219	-1.29	0.847								-2.21	-1.55	-3.31	-3.68	-4.32	-4.74	-2.7	-5.16	-1.87	-6.73	-2.43	-1.28	-4.17	-6.22
-0.611	1.32	1.67	-1.92	-1.12	-1.44	1.44								-2.43	-1.91	-3.29	-3.14	-3.89	-4.58	-2.46	-4.87	-1.31	-7.36	-0.629	-2.52	-4.05	-6.46
-0.724	1.32	1.56	-1.82	-0.276	-1.88	1.39								-2.78	-1.4	-3.18	-3.08	-3.65	-4.73	-3.31	-3.45	-1.9	-6.72	-1.9	-2.75	-3.88	-6.67
-0.639	1.26	0.525	-1.17	0.862	-2.02	1.73								-2.68	-1.43	-3.3	-2.52	-3.99	-5.08	-4.06	-4.69	-2.56	-8.01	-2.16	-1.85	-4.26	-6.67
-0.702	0.934	0.993	-1.28	1.04	-2.69	1.7								-2.75	-1.47	-3.42	-2.51	-3.55	-4.91	-3.23	-4.85	-2.62	-6.9	-3.32	-2.2	-3.94	-5.71
-0.77	0.96	0.0752	-1.35	1.24	-2.72	2.18								-2.27	-0.943	-3.45	-2.77	-3.55	-5.62	-1.66	-5.49	-2.69	-6.98	-2.23	-2.37	-4.81	-4.96
-0.844	0.926	-0.454	-1.86	0.0306	-2.77	1.41								-2.64	-1.19	-3.46	-2.79	-4.23	-5.02	-2.71	-5.82	-3.04	-6.84	-1.54	-1.56	-4.35	-4.12
-0.813	0.808	-1.2	-1.96	-0.289	-1.4	1.59								-2.36	-1.78	-3.29	-2.67	-4.47	-3.68	-2.31	-5.29	-2.36	-6.15	-1.82	-0.967	-4.54	-4.55
-0.786	0.605	0.695	-1.98	0.382	-0.391	1.5								-2.68	-0.641	-3.32	-2.36	-4.59	-2.25	-2.41	-3.37	-1.88	-6.67	-0.971	-2.07	-4.79	-5.53
-0.867	0.359	0.177	-1.17	0.677	-1.34	1.08								-2.81	-0.284	-3.48	-2.67	-4.43	-2.75	-2.78	-3.5	-2.35	-6.02	-2.37	-1.82	-3.98	-5.87
-0.738	0.529	0.0228	-0.789	-0.548	-0.817	1.11								-2.65	-1.2	-3.37	-2.65	-4.46	-2.35	-2.22	-4.21	-2.85	-6.18	-2.76	-1.55	-4.48	-6.54
-0.708	0.382	2.01	-1.39	0.474	-0.748	0.855								-2.57	-0.753	-3.37	-2.84	-4.11	-2.78	-2.48	-5.25	-3.59	-6.74	-2.02	-2.21	-5.01	-5.13
-0.688	0.266	3.54	-1.14	0.0705	-0.948	0.773								-1.97	0.0183	-3.65	-2.64	-4.06	-3.24	-2.66	-3.18	-3.5	-6.11	-1.31	-2.5	-4.17	-5.21
-0.629	0.435	2.41	-0.838	-0.657	-1.06	0.726								-2.42	-0.973	-3.12	-2.91	-4.58	-2.96	-1.9	-2.41	-3.03	-5.31	-1.56	-1.36	-5.04	-6.23
-0.694	0.463	2.84	-1.32	0.538	-1.24	0.544								-2.21	-1.97	-2.53	-2.92	-4.66	-2.94	-1.36	-3.21	-3.19	-6.1	-1.42	-1.98	-4.55	-7.02
-0.676	0.291	4	-0.963	-0.359	-1.29	0.817								-2.25	-0.625	-2.32	-2.77	-4.87	-2.59	-0.886	-3.77	-2.06	-6.4	-1.24	-1.56	-3.76	-6.41
-0.706	0.427	3.6	-1.14	0.361	-1.07	0.942								-2.14	-1.02	-2.37	-2.1	-4.56	-2.93	-2.34	-3.94	-1.45	-6.51	-2.73	-1.06	-3.8	-6.21
-0.714	0.199	2.88	-0.848	-0.525	-1	1.92								-2.01	-0.889	-2.43	-1.71	-4.67	-3.62	-2.42	-3.72	-1.61	-5.61	-1.39	-2.17	-4.06	-5.8
-0.736	0.317	1.51	-0.425	0.136	-0.665	1.2								-2.32	-0.889	-2.47	-2.49	-4.42	-3.52	-1.6	-3.72	-2.11	-5.92	-1.07	-2.63	-4.09	-4.23
-0.722	0.0351	2.58	-0.368	0.504	-1.42	1.53								-2.05	-1.56	-2.55	-1.81	-4.33	-4.07	-2.75	-3.25	-2.25	-6.92	-1.22	-2.56	-4.11	-3.95
-0.72	0.12	2.57	-1.74	-0.315	-1.14	1.51								-2.06	-0.0446	-2.54	-2.43	-4.6	-3.15	-2.87	-1.91	-2.26	-6.16	-1.58	-2.71	-3.88	-4.79
-0.635	0.916	3.76	-1.87	-0.0647	-0.986	1.38								-2.13	-0.475	-2.74	-2.43	-4.78	-4.21	-3.03	-3.19	-2.29	-6.88	-2.23	-1.98	-4.39	-4.18
-0.747	0.246	3.36	-1.02	0.613	-0.215	1.45								-1.68	-0.418	-2.76	-2.79	-4.29	-4.51	-2.26	-3.23	-2.25	-5.96	-1.47	-1.72	-4.7	-4.09
-0.757	0.351	4.61	-0.538	1.69	-0.425	1.14								-2.19	-0.788	-2.85	-3.58	-4.15	-4.41	-2.47	-2.64	-1.56	-6.5	-1.14	-2.63	-4.57	-4.81
-0.717	-0.132	2.42	-0.593	0.115	-1.15	1.5								-1.99	0.938	-2.94	-3.39	-4.34	-4.85	-0.771	-3.93	-1.74	-5.6	-2.23	-1.53	-4.76	-4.35
-0.671	0.0373	2.46	-1.02	-0.513	-1.48	2.06								-2.22	-0.437	-2.71	-2.93	-4.57	-4.76	-1.57	-3.3	-2.19	-6.14	-0.862	-2.1	-5.12	-5.5
-0.66	-0.257	2.27	-0.853	0.926	-1.02	1.39								-2.21	0.16	-2.96	-2.66	-4.76	-4.44	-2.27	-2.7	-2.39	-6.79	-0.592	-2.18	-4.57	-5
-0.602	-0.107	2.93	-1.21	0.994	-0.879	1.27								-1.32	0.447	-2.88	-2.95	-4.28	-4.45	-1.34	-1.98	-2.07	-5.92	-2.59	-1.4	-4.56	-6.05
-0.625	0.0284	2.15	-0.951	0.627	-0.829	0.935								-1.77	0.434	-3.03	-3.26	-4.24	-4.61	-1.32	-0.41	-2.52	-6.3	-2.48	-0.632	-4.75	-5.79
-0.634	-0.0138	2.44	-1.66	-0.208	-1.47	1.42								-1.72	0.892	-3.24	-3.28	-4.31	-5.07	-1.97	-0.834	-1.99	-4.97	-1.92	-1.74	-4.05	-5.27
-0.766	-0.0578	2.94	-0.714	1.62	-0.377	1.9								-2.43	-0.733	-3.2	-2.8	-4.36	-4.11	-1.46	-2.33	-2.9	-6	-1.22	-0.559	-4.8	-4.71
-0.656	-0.153	3.36	-1.23	-0.0233	-1.08	1.13								-1.82	-0.128	-3.23	-2.66	-4.33	-4.3	-1.65	-2.57	-2.63	-4.66	-1.32	-2.62	-4.24	-4.21
-0.698	0.0237	3.45	-1.01	-0.139	-0.49	1.38								-1.35	1.25	-3.24	-2.55	-5.01	-3.76	-2.57	-2.52	-2.56	-5.62	-2.09	-2.03	-3.79	-5.16
-0.791	-0.168	2.06	-1.17	0.862	-0.487	0.94								-1.64	-0.41	-3.49	-3.17	-5.06	-3.54	-1.81	-1.72	-2.54	-6.3	-1.51	-3.22	-4.19	-5.66
-0.76	-0.183	3.38	-1.9	0.309	-0.923	0.849								-1.82	-0.48	-2.9	-2.61	-4.95	-3.6	-2	-1.89	-2.52	-6.54	-2.05	-1.55	-4.44	-4.76
-0.946	-0.283	2.16	-1.59	0.75	-1.2	0.702								-1.69	-0.203	-3.21	-2.39	-5.02	-3.75	-1.03	-2.12	-1.46	-6.36	-1.93	-0.905	-4.66	-5.03
-0.937	-0.201	3.67	-1.41	0.55	-1.05	0.62								-1.5	-0.464	-3.01	-2.12	-3.97	-4.65	-1.42	-2.61	-1.73	-6.41	-1.74	-2.19	-3.79	-4.01
-0.952	-0.294	2.42	-0.787	0.0928	-1.45	0.85								-1.71	0.157	-2.91	-2.22	-3.11	-4.43	-1.83	-4.2	-2.85	-5.98	-1.74	-0.593	-3.81	-3.39
-0.771	0.0265	2.97	-1.16	0.125	-1.48	1.71								-1.34	0.293	-3.06	-1.97	-3.92	-4.56	-1.37	-3.86	-2.4	-6	-1.43	-2.09	-4.24	-2.72
-0.913	0.59	2.9	-0.338	0.241	-1.64	1.03								-1.67	-0.722	-3.05	-1.94	-3.82	-5.11	-2.24	-4.14	-2.7	-6.62	-1.44	-1.8	-4.08	-4.15
-1.03	-0.335	3.79	-0.334	-0.476	-2.04	1.52								-1.27	-0.365	-3.05	-2.02	-3.46	-4.94	-2.9	-2.68	-2.81	-5.64	-0.981	-2.91	-4.25	-4.24
-0.859	-0.182	2.87	-0.838	0.0483	-1.87	0.993								-1.19	-0.863	-3.05	-2.49	-3.53	-4.57	-1.9	-2.46	-2.91	-5.86	0.0677	-1.84	-4.41	-4.87
-0.791	-0.22	2.14	-1.87	0.0616	-1.49	1.22								-1.1	0.448	-3.17	-2.56	-3.6	-5.34	-1.95	-3.11	-2.45	-5.29	-1.56	-2.67	-4.41	-3.89
-0.809	-0.15	3.35	-1.72	-0.297	-1.46	0.408								-0.827	0.0578	-3.13	-2.67	-3.92	-6.15	-1.82	-2.52	-2.72	-5.79	-0.596	-2.87	-4.16	-4.55
-0.827	-0.249	3.29	-1.48	0.281	-1.87	0.772								-1.27	0.705	-3.22	-3.17	-4.25	-6.02	-1.49	-2.35	-2.41	-6.22	-0.674	-3.49	-4.27	-5.29
-0.808	-0.188	3.68	-1.4	0.718	-1.27	0.521								-1.27	-0.693	-3.17	-3.15	-4.61	-5.61	-0.675	-2.46	-2.03	-6.33	-1.81	-1.71	-3.74	-5.03
-0.673	0.0298	2.89	-1.68	1.02	-1.94	0.44								-1.54	-0.0206	-3.67	-3.25	-4.79	-4.14	-1.39	-3.5	-2.36	-5.68	-0.68	-1.16	-4.14	-5.45
-0.759	0.0046	2.58	-1.52	-0.521	-3.58	0.348								-2.09	0.0224	-3.67	-3.29	-4.57	-4.4	-1.43	-3.75	-1.26	-5.21	-2.41	-2.02	-4.17	-3
-0.53	-0.496	2.63	-0.964	-0.217	-3.95	0.011								-1.95	-1.55	-3.46	-2.95	-4.26	-4.51	-0.658	-2.06	-1.19	-4.36	-1.99	-0.804	-3.66	1.29
-0.245	-0.103	2.48	-1.06	0.512	-3.73	0.274								-2.08	-0.789	-3.58	-2.66	-3.45	-5.52	-1.47	-2.38	-1.73	-5.65	-2.29	-1.77	-4.06	1.54
-0.302	-0.377	3.29	-1.82	-0.287	-3.08	0.032								-1.39	-1.37	-3.61	-2.86	-3.55	-5.03	-2.38	-2.06	-1.65	-5.28	-1.22	-2.25	-4.18	1.49
-0.398	-0.39	3.64	-2.51	1.29	-2.46	0.616								-1.14	-0.669	-3.76	-3.83	-3.98	-4.33	-0.531	-1.52	-1.2	-5.06	-1.51	-1.56	-4.16	1.72
-0.368	-0.135	3.3	-1.58	0.72	-3.4	1.25								-1.3	-1.13	-3.72	-3.03	-4.61	-4.46	-1.02	-1.8	-0.834	-5.31	-0.565	-2.1	-3.85	-0.303
-0.386	-0.195	2.94	-1.29	1.04	-2.56	1.78								-1.63	-1.81	-3.53	-3.78	-4.05	-4.84	-2.19	-2.85	-0.931	-5.79	-0.782	-1.29	-3.19	0.619
-0.432	-0.286	2.52	-1.53	0.295	-3.44	1.22								-1.56	-0.708	-3.55	-4.07	-4.24	-5.02	-2.7	-1.47	-1.16	-5.8	-0.737	-1.42	-3.91	-1.24
-0.615	-0.125	2.86	-0.947	0.656	-2.99	1.46								-1.43	-1.18	-3.44	-3.96	-4.06	-5.23	-1.63	-1.55	-1.42	-5.4	-0.921	-2.02	-3.75	-0.975
-0.589	-0.134	2.36	-1.28	1.09	-3.25	0.654								-1.23	-0.747	-3.67	-3.78	-4.06	-5.66	-1.99	-2.88	-1.25	-5.59	-2.05	-0.578	-4.57	-0.207
-0.561	-0.0199	2.16	-1.95	1.03	-2.55	0.795								-1.93	-0.583	-3.04	-3.48	-3.94	-5.09	-1.09	-3.07	-1.73	-4.56	-1.27	-0.685	-4.52	-1.76
-0.671	1.07	2.86	-1.42	0.0795	-2.52	0.98								-1.78	-0.823	-3.23	-3.56	-3.33	-5.79	-1.49	-3.28	-0.82	-5.85	-1.13	-1.68	-4.64	-2.25
-0.757	0.0102	3.19	-1.15	0.813	-3.11	0.544								-0.864	-1.37	-3.23	-3.92	-3.44	-4.94	-2.07	-2.71	-0.785	-5.52	-1.97	-1.55	-5.19	-1.97
-0.732	0.365	2.28	-0.523	-0.239	-3.06	0.348								-0.351	-0.533	-3.52	-3.1	-4.34	-4.24	-1.94	-2.27	-1.08	-6.42	-2.91	-0.818	-4.48	-2.32
-0.543	0.0384	2.17	-1.08	1	-2.81	0.118								-1.05	-1.37	-3.67	-3.67	-4.3	-3.75	-1.82	-2.49	-1.31	-5.47	-3.18	-0.607	-4.61	-1.23
-0.566	0.0248	2.34	-1.02	0.387	-2.44	0.799								-1.08	-1.41	-3.39	-3.9	-3.93	-4.66	-2.47	-2.25	-2.02	-5.11	-1.61	-0.677	-4.8	-0.828
-0.533	-0.0804	3	-0.903	0.346	-2.03	0.41								-0.83	-1.54	-3.23	-3.54	-3.9	-4.03	-2.97	-3.62	-2.06	-5.95	-1.25	0.0864	-4.72	-0.351
-0.731	-0.0915	2.14	-1.04	0.383	-2.91	0.348								-1.05	-1.98	-3.69	-3.33	-3.87	-3.81	-2.68	-3.08	-1.91	-5.41	-0.598	-1.72	-5.02	-0.674
-0.687	-0.0869	3.58	-1.54	0.341	-2.95	0.689								-1.58	-1.95	-3.91	-3.7	-4.19	-3.99	-2.27	-3.5	-1.96	-5.97	-0.0801	-1.88	-4.76	-1.67
-0.624	0.0418	2.39	-0.789	-0.347	-2.67	0.216								-1.61	-1.04	-3.73	-3.42	-4.46	-4.83	-2.66	-3.84	-2.06	-4.78	-0.477	-0.786	-4.73	-2.47
-0.552	-0.168	3.01	-0.946	0.524	-2.92	0.456								-1.18	-1.53	-3.79	-2.99	-4.92	-4.55	-2.56	-2.75	-1.16	-5.5	-0.826	-0.422	-4.66	-2.29
-0.478	-0.014	3.46	-0.589	1.8	-3.05	0.332								-1.12	-0.972	-3.92	-1.96	-4.93	-4.17	-2.28	-3	-1.41	-5.53	-0.242	-1.41	-4.49	-2.28
-0.57	0.00851	2.29	-0.872	-0.875	-2.41	-0.00499								-1.3	-1.2	-3.96	-2.27	-4.53	-3.74	-2.51	-3.1	-1.65	-4.53	-0.812	-0.358	-4.79	-2.9
-0.677	-0.031	2.52	-0.858	0.957	-2.98	-0.0895								-1.09	-0.956	-3.61	-3.09	-4.51	-3.92	-1.9	-3.22	-2	-4.89	-2.28	-0.515	-4.51	-1.69
-0.709	0.17	2.59	-1.03	0.305	-3.22	0.0549								-1.2	-1.52	-2.9	-2.89	-4.36	-3.97	-1.71	-3	-1.78	-5.32	-0.275	-1.73	-5.37	-3.23
-0.755	-0.0609	1.45	-0.999	-0.295	-2.06	-0.137								-1	-2.35	-2.92	-3.35	-4.24	-4.45	-2.33	-0.976	-1.13	-4.37	-0.995	-0.685	-5.13	-2.64
-0.784	-0.0819	3.07	-2.19	-1.03	-2.68	0.292								-1.45	-2.03	-3	-2.46	-4.07	-4.1	-1.89	-2.25	-1.82	-5.36	-0.385	-0.205	-5.58	-1.89
-0.664	0.372	3.54	-1.03	1.51	-2.45	0.564								-1.6	-1.55	-2.82	-1.82	-4.38	-4.06	-3.24	-2.31	-1.72	-4.72	-1.74	-2.82	-5.28	-2.49
-0.593	0.0921	0.757	-1.3	0.829	-3.08	0.363								-0.964	-1.79	-3.12	-1.25	-3.88	-4.41	-1.73	-1.86	-1.96	-5.05	-2.94	-0.692	-5.11	-2.53
-0.696	0.242	2.22	-1.63	0.955	-2.85	0.227								-0.985	-1.41	-3.03	-2.66	-3.59	-4.14	-2.18	-1.57	-2.13	-5.83	-0.0948	-0.821	-4.48	-2.68
-0.686	0.562	2.15	-0.421	0.385	-2.63	0.275								-1.46	-1.12	-3.03	-2.84	-3.8	-4.69	-2.04	-1.88	-1.92	-4.8	-0.374	0.0854	-4.62	-2.71
-0.711	0.216	2.64	-1.57	0.193	-2.79	-0.738								-1.3	-1.83	-3.14	-3.16	-3.71	-3.87	-1.99	-2.25	-0.694	-4.35	-1.21	-1.4	-5.05	-2.44
-0.676	0.331	2.24	-0.67	-0.236	-3.64	-0.172								-1.53	-1.23	-3.17	-3.27	-3.9	-4.36	-2.35	-2.42	-1.25	-4.89	-0.967	-0.411	-4.92	-1.3
-0.65	1.55	2.67	-0.706	-0.234	-3.15	-0.0434								-1.52	-1.24	-3.13	-2.59	-4.38	-3.61	-2.38	-2.75	-1.4	-6.4	-1.22	-0.809	-4.48	-2.46
-0.666	0.822	0.836	-0.559	0.349	-2.47	-0.416								-1.14	-0.848	-3.08	-2.47	-4.15	-3.9	-3.16	-3.19	-1.66	-5.53	-1.48	-0.473	-4.23	-2.57
-0.445	0.59	0.774	-1.38	-0.714	-2.4	0.287								-1.17	-2.14	-3.19	-2.36	-4.05	-3.67	-2.62	-2.81	-1.33	-4.76	0.0989	-2.27	-4.75	-2.52
-0.146	0.818	1.66	-0.78	-0.768	-1.88	-0.0543								-0.879	-2.33	-3.06	-2.39	-4.04	-4.22	-2.5	-2.4	-1.39	-4.63	-1.49	-1.65	-4.94	-2.19
-0.0297	0.74	2.22	-1.01	1.05	-1.56	-0.208								-1.23	-2.26	-3.14	-2.57	-4.65	-4.05	-1.71	-2.01	-1.62	-4.47	0.0119	-0.912	-4.5	-2.15
-0.0589	1.25	1.63	-1.32	1.71	-1.75	0.361								-1.49	-1.99	-3.04	-2.17	-4.53	-4.21	-1.47	-3.58	-1.58	-4.64	-1.08	-0.661	-5.18	-3.31
-0.223	1.27	3.3	-1.04	0.045	-2.11	0.0574								-1.86	-1.76	-3.01	-2.78	-4.05	-4.07	-2.12	-2.01	-1.5	-5.11	-1.05	-2.6	-5.08	-2.21
