# Supplementary material for: Metabolic sensing in AgRP neurons integrates homeostatic state with dopamine signalling in the striatum
Source: eLife journal article supplement (doi:10.7554/elife.72668), 2022-01-12
Supplement: fig1-figsupp1-data1 [file FigS1F.xlsx]

## Sheet: Sheet1
AgrpCrat naive														Agrp Crat 2nd exposure
0.663	-0.267	0.0485	-0.455	1.8										0.572	0.0716	0.293	0.755	-0.128	-0.208	0.574	-0.579	-0.463	-0.639	0.984	0.384
0.953	-1.8	0.0315	0.0429	1.21										0.438	-0.0309	0.481	-0.332	0.812	-0.708	0.0122	-0.811	-0.896	-0.716	0.826	-0.00594
0.411	-0.525	-0.0614	-0.303	0.909										0.542	0.382	1.28	-0.468	0.283	-0.779	0.914	-0.78	-0.687	-0.846	0.864	0.221
-0.395	-1.49	-0.0877	-0.165	0.965										0.402	0.436	0.636	0.201	-1.41	-0.229	1.3	-0.536	-0.811	-0.615	0.705	0.537
0.865	-1.06	-0.065	-0.0568	1.92										0.686	-0.451	-0.148	0.0357	-0.623	-0.0386	0.599	-0.582	-0.758	-0.893	0.679	0.361
0.398	-1.38	-0.492	0.8	2.61										0.592	-0.353	0.0409	0.655	-0.2	-0.228	-0.256	-0.743	-0.868	-0.875	0.86	0.483
-0.513	-1.71	-0.146	0.366	2.06										0.176	-0.181	-0.423	0.573	-0.0694	-0.21	-0.141	-0.741	-0.738	-0.601	0.739	0.687
-0.325	-1.35	-0.485	0.704	3.48										-0.0188	-0.147	-0.601	0.055	-1.02	0.453	0.13	-0.682	-0.751	-0.991	0.626	-0.143
0.516	-1.68	-0.365	0.0581	2.3										0.53	-0.0256	-0.912	0.0465	0.807	0.543	0.38	-0.821	-0.987	-1.02	0.983	0.513
0.521	-1	-0.358	0.739	0.502										0.861	0.0252	-1.38	0.395	0.415	-0.271	-0.0325	-0.925	-0.958	-0.957	0.962	1.12
0.983	-1.54	-0.164	0.745	0.778										0.564	-0.471	-0.366	0.0232	0.405	-0.313	1.12	-0.806	-0.952	-1.21	0.558	0.592
-0.34	-2.01	-0.146	0.483	1.23										0.519	0.106	-0.429	0.72	0.81	-0.102	1.41	-1.05	-0.783	-1.06	0.679	0.749
-0.261	-2.56	-0.213	-0.446	1.8										0.373	-0.422	-0.321	1.2	0.415	-0.476	1.33	-0.959	-0.837	-0.979	0.266	0.685
0.772	0.115	-0.468	-0.3	1.54										0.187	-0.0783	-0.7	1.64	0.924	-0.578	1.36	-0.899	-0.673	-0.19	0.375	0.0747
0.787	-0.902	0.228	-0.624	1.23										0.287	-0.687	0.458	1.5	0.296	-0.209	0.842	-0.163	-0.425	-0.768	0.693	-0.224
-0.0541	-2.25	0.135	0.389	0.429										0.145	-0.713	0.242	1.66	0.0335	-0.477	0.586	0.418	-0.575	-0.471	0.269	-0.328
-0.0215	-1.47	0.2	-0.22	0.928										0.352	-1.3	0.193	0.97	0.292	-0.638	0.768	0.582	-0.622	0.499	0.484	-0.691
0.73	-1.64	0.332	0.0867	1.74										0.229	-0.977	0.286	0.64	-0.579	-0.346	0.31	0.148	-0.426	0.634	0.202	0.379
-0.639	0.433	0.383	0.477	1.51										1.03	-0.678	0.0657	0.963	-0.482	-0.197	-0.0859	-0.125	-0.488	0.372	0.343	0.468
-0.522	-1.98	0.923	0.709	1.19										0.831	-1.18	0.599	1.01	0.221	-0.338	-0.622	-0.264	-0.432	0.316	0.316	0.753
-0.587	-1.06	0.151	0.341	0.614										0.914	-0.93	-0.00264	1.14	-0.707	-0.941	-0.281	-0.242	-0.656	0.436	0.997	0.259
-0.507	-2.42	-0.291	0.885	0.0619										0.516	-0.619	0.568	0.832	0.0184	-0.565	0.727	-0.524	-0.715	-0.0221	0.971	-0.556
-0.711	-1.27	0.255	1.5	0.268										0.516	-0.845	-0.829	1.06	-0.723	-0.419	-0.234	-0.469	-0.862	-0.0424	0.961	-0.68
-0.534	-0.825	-0.445	0.216	0.0148										0.769	-0.676	-0.0141	1.11	-0.182	-0.0405	-0.751	-0.253	-1.18	-0.11	0.654	-0.81
0.393	-1.45	-0.114	1.02	-0.511										1.01	-0.465	-0.277	1.17	-0.345	-0.526	0.606	-0.408	-0.487	-0.265	0.477	-0.354
-0.801	-1.2	0.172	0.175	0.33										0.722	-0.891	0.135	1.09	-0.297	0.0374	-0.081	-0.601	-0.731	0.202	1.04	0.0948
1.29	-0.965	-0.219	-0.573	0.181										0.631	-0.946	0.756	0.882	0.0352	0.443	0.422	-0.497	-0.544	-0.219	0.736	-0.348
0.117	-0.981	-0.0256	0.242	-1.3										-0.00702	-1.06	0.481	1.26	-1.24	-0.111	-0.0467	-0.768	-0.789	0.0851	0.868	-0.17
-0.122	-1.55	0.114	0.776	-1.4										0.912	-1.46	0.423	0.612	-0.627	-0.207	0.515	-0.732	-1.12	0.108	0.437	0.252
0.177	-0.531	-0.0943	0.327	-0.0594										0.487	-1.35	0.634	0.854	0.0358	0.276	-0.0837	-0.719	-1.06	-0.171	0.664	0.274
-0.19	-2.41	0.134	-0.311	1.23										0.397	-1.02	0.311	0.642	-1.34	0.214	0.148	-0.7	-1.24	-0.252	0.412	0.0758
-0.287	-1.25	0.413	-0.103	1.3										-0.255	-1.49	0.406	0.987	-1.16	0.564	0.403	-0.676	-1.47	-0.0379	0.627	-0.465
-0.631	-2.02	0.0816	-0.386	1.39										-0.128	-1.73	0.491	1.49	-1.74	0.25	0.475	-0.811	-1.19	0.0057	0.507	0.291
-1.44	-2.65	0.127	0.167	-1.37										-0.0974	-2.05	0.502	1.25	-0.811	0.732	0.375	-0.791	-0.901	-0.425	0.635	0.572
-1.54	-2.1	0.193	0.283	0.804										0.741	-2.45	1.21	-0.483	-0.872	0.25	0.294	-0.583	-0.404	-0.231	0.141	0.945
-0.0735	-1.13	-0.00554	0.119	0.224										-0.674	-2.26	0.579	-0.579	-1.19	0.609	1.16	-0.409	-0.583	-0.313	0.163	0.758
0.739	-2.05	-0.431	-0.103	0.837										0.154	-2.2	0.978	-0.196	-1.02	0.142	1.15	-0.673	-0.869	-0.221	0.0427	-6.95e-05
-0.202	-1.77	0.445	-0.173	1.66										-0.192	-2.43	1.33	0.284	-0.688	0.288	-0.615	-0.744	-0.928	0.104	0.0518	0.42
-0.153	-1.86	0.046	-0.603	0.507										0.14	-2.4	1.15	0.162	-0.951	0.199	0.752	-0.793	-1.17	0.0599	-0.0393	0.731
-0.197	-1.7	-0.0359	-0.921	-1.12										0.113	-1.59	0.739	-0.159	-0.914	-0.346	-0.525	-0.693	-1.45	0.0338	-0.0594	0.982
0.178	-1.08	-0.139	-0.669	0.192										0.389	-1.82	0.537	0.243	0.223	0.253	0.739	-0.671	-1.03	-0.0025	0.122	0.772
1.57	-2.93	-0.0473	-0.0245	0.526										0.383	-1.12	0.484	0.198	0.0441	-0.0872	0.524	-0.727	-1.25	0.128	0.105	0.543
1.04	-1.46	-0.589	-0.672	2.03										0.388	-1.2	1.17	0.454	0.0493	-0.476	-0.155	-0.875	-1.62	-0.25	-0.0438	0.4
0.27	-0.906	-0.381	-0.92	1.66										0.576	-2.06	1.15	0.203	-0.259	-0.899	0.045	-0.788	-1.06	0.131	0.0384	0.177
-0.118	-1.02	-0.337	-0.533	1.08										0.249	-2.23	0.73	0.299	0.422	-1.22	0.711	-0.818	-1.02	-0.0461	0.408	0.105
0.702	-0.12	-0.742	-1.56	-0.00825										0.33	-1.96	1.61	-0.104	-0.704	-0.785	-0.789	-0.681	-0.682	-0.18	0.0177	0.4
0.263	-0.688	-0.363	-1.47	-0.626										-0.214	-1.1	1.76	0.232	-0.0135	-0.909	-0.967	-0.751	-0.761	-0.426	0.04	-0.135
-0.712	-1.28	-0.142	-1.2	0.565										-0.422	-1.05	1.12	-0.149	0.122	-0.972	-0.775	-0.682	-0.796	-0.522	0.233	-0.161
1.07	-1.55	0.192	-1.4	2.05										0.114	-1.3	1.46	-0.126	-0.181	-1.24	-1.28	-0.959	-0.777	-0.266	-0.0341	0.131
0.576	-1.13	0.411	-1.24	2.02										0.54	-1.41	1.1	0.313	0.106	-1.22	0.427	-1.05	-0.619	-0.522	0.0328	-0.499
1.35	-1.07	-0.361	-1.48	1.55										0.267	-1.59	0.487	-0.253	-0.0937	-1.27	-0.229	-1.08	-0.403	-0.356	-0.197	-0.318
0.877	-1.93	-0.103	-1.41	1.65										0.393	-1.2	1.04	0.375	-0.54	-1.33	1.5	-0.889	-0.859	-0.0973	-0.17	0.695
0.792	-1.92	-0.236	-1.57	-0.561										0.445	-1.27	0.987	0.00202	-0.989	-1.37	0.225	-0.903	-0.73	-0.229	-0.237	0.0743
-0.121	-1.36	-0.0738	-1.01	-1.63										-0.129	-1.41	0.623	-0.197	-1.28	-0.868	-0.241	-0.636	-0.939	-0.785	-0.187	1.18
1.07	-1.17	-0.377	-1.15	0.353										0.919	-1.36	0.109	-0.259	-0.63	-1.29	-0.887	-0.676	-0.891	-0.467	-0.4	0.619
0.472	-1.91	0.567	-0.777	1.46										0.341	-0.87	-0.124	-0.117	-1.32	-0.747	0.833	-1.04	-0.806	-0.824	-0.366	0.731
0.205	-1.3	0.132	-0.868	-0.405										0.5	0.0233	-0.516	0.486	-0.507	-0.822	0.863	-0.799	-1.24	-0.592	-0.709	0.358
0.692	-1.02	0.0674	-1.36	-1.33										1.32	0.295	-1.52	0.0867	-0.401	-1.28	-0.119	-0.195	-0.936	-0.793	-0.722	-0.00271
-0.534	-0.638	0.0848	-1.29	-1.19										1.03	0.696	-0.686	0.13	-0.635	-0.949	0.59	1.16	-0.739	-0.611	-0.98	-0.00727
0.954	-0.945	0.293	-1.67	-1.95										0.851	0.439	-0.875	-0.102	-0.715	-1.22	0.704	1.84	-0.65	-0.676	-0.824	0.78
0.552	-0.958	0.432	-1.01	-2.77										0.739	0.32	-0.388	0.175	-0.907	-1.2	-0.604	1.74	-0.734	-0.696	-0.643	2.82
1.29	-1.52	-0.0265	-0.213	-3.2										0.468	-0.468	-0.904	-0.221	-0.77	-1.69	-0.00379	1.53	-1.03	-0.443	-0.514	3.21
1.33	-1.2	0.129	0.904	-2.3										0.127	-0.21	-0.123	0.269	-0.74	-1.09	-0.344	1.42	-0.775	-0.536	-0.572	4.21
0.922	-1.01	-0.611	1.01	-2.48										0.506	-0.285	-0.404	0.426	-0.0193	-1.04	-1.94	1.32	-0.755	-0.828	-0.737	3.67
0.0294	-1.39	-0.35	0.218	-1.62										0.475	-0.425	1.1	0.223	-1.05	-0.978	-2.57	1.25	-1.21	-0.123	-0.694	2.66
0.207	-1.09	0.0319	-0.221	-1.86										0.679	-0.897	1.99	0.172	-1.06	-1.12	-1.87	1.24	-1.25	0.148	-1.18	2.41
0.718	-1.27	0.349	-0.238	-1.66										0.451	-0.173	0.864	0.323	-0.321	-1.18	-1.35	1.13	-1.35	-0.143	-0.578	2.44
0.305	-0.443	-0.481	0.215	-2.89										0.201	-0.294	0.498	0.281	0.886	-0.739	0.0812	1.44	-1.35	-0.0517	0.353	2.05
1.3	0.478	-0.241	-0.305	-2.97										-0.31	-0.407	0.193	0.367	-0.085	-1.18	-0.998	1.19	-1.03	-0.255	0.121	1.68
0.731	-1.3	-0.421	0.157	-1.11										-0.22	-0.109	0.929	0.144	-0.828	-1.6	-1.22	0.807	-0.966	-0.441	0.12	1.43
1	-1.14	-0.269	0.128	-0.259										-0.251	-0.542	1.07	0.216	-0.661	-1.21	-1.2	0.732	-0.895	-0.351	0.0118	1.85
1.38	-0.317	-0.394	-0.261	0.717										-0.144	-0.56	0.847	-0.365	-0.0462	-1.49	-1.8	0.575	-0.805	-0.533	0.111	1.1
1.25	-0.803	-0.311	-0.668	1.1										0.0115	-0.566	0.631	-0.213	-0.413	-1.55	-2.37	0.284	-0.681	-0.643	-0.0343	0.761
1.17	-1.64	-0.368	-0.649	-0.0169										-0.147	-0.681	1.22	0.122	-1.66	-1.17	-1.61	0.442	-0.765	-0.554	0.144	1.74
0.791	-0.321	0.298	0.0528	0.117										0.193	-0.101	1.44	-0.366	-0.163	-1.53	-1.27	0.395	-1.36	-0.585	0.0489	1.2
0.365	-2.21	0.227	0.476	-0.54										0.0569	0.413	1.28	0.519	-0.211	-1.66	-2.66	0.374	-1.63	-0.773	-0.31	1.4
0.466	-0.72	-0.0215	-0.0176	-0.263										-0.169	0.47	0.811	-0.124	-0.428	-1.2	-2.28	0.741	-1.72	-0.561	-0.0538	1.78
0.63	-1.21	-0.266	-0.0597	-0.00742										-0.206	-0.439	1.37	-0.4	0.0422	-1.57	-1.9	0.37	-1.75	-0.0708	-0.563	1.05
0.138	-1.99	-0.0269	0.0214	1.36										-0.641	-0.104	0.278	-0.964	-0.856	-1.51	-1.73	-0.129	-1.28	-0.0474	-0.228	0.924
0.725	-0.942	-0.0491	0.0335	-0.124										-0.797	-0.507	-1.42	-0.62	-0.24	-1.04	0.364	-0.376	-1.29	0.265	-0.174	1.53
1.43	-0.259	-0.163	-0.765	-0.228										-0.219	-1.18	-0.0688	-0.613	-0.3	-1.27	0.715	0.0835	-0.444	0.256	-0.0359	1.51
0.371	-0.925	0.0053	-0.164	0.442										0.686	-0.276	-0.0674	-0.585	0.0907	-1.7	0.425	-0.165	-0.564	0.149	-0.193	1.42
0.00891	-1.23	0.0733	-1.58	1.1										0.669	-0.765	-0.415	-0.997	0.431	-1.52	0.0115	0.609	-0.812	-0.252	-0.194	0.536
1.06	-1.83	-0.21	-1.41	0.861										0.603	-0.661	-1.32	-0.522	-0.295	-1.58	0.713	0.544	-0.57	0.113	0.000883	0.443
1.12	-2.03	0.00359	-0.471	1.26										0.684	-0.347	-0.635	-0.417	-0.723	-1.74	1.44	0.387	-0.785	-0.354	-0.0794	0.122
0.427	-2	-0.0899	-1.12	2.09										0.202	-0.977	0.129	-0.412	-0.649	-2.36	1.19	0.111	-1.3	-0.6	-0.0562	0.544
1.11	-1.51	0.208	-0.632	1.52										0.344	-0.591	0.514	-0.324	0.326	-1.53	1.14	0.22	-1.43	-0.602	-0.321	0.483
0.849	-1.55	0.0485	-0.954	1.44										-0.176	-0.509	0.465	0.233	-0.236	-2	0.853	-0.123	-1.65	-0.584	0.0753	0.75
1.69	-2.02	0.242	-0.0421	0.635										0.00333	-0.557	0.755	-0.3	0.273	-1.51	0.165	-0.22	-1.62	-0.458	-0.0492	0.366
3.43	-1.58	-0.235	0.415	0.398										0.0828	-0.146	1.33	-0.644	0.21	-1.73	-0.679	-0.126	-1.25	-0.177	-0.332	0.813
3.85	-0.017	-0.256	-0.0683	1.35										0.183	-0.393	1.25	-0.634	0.453	-1.41	-1.39	-0.141	-1.55	-0.27	-0.467	0.464
3.28	-1.49	0.0373	-0.0386	0.911										0.586	-0.359	1.01	-0.687	0.0212	-1.73	-0.282	-0.234	-1.28	0.0403	-0.464	0.826
2.22	-2.25	0.287	0.303	1.26										1.4	-0.614	1.81	-0.853	0.248	-1.74	-0.231	-0.0832	-1.42	0.477	-0.569	0.775
2.38	-1.44	-0.509	-0.404	1.05										1.14	-0.395	1.24	-0.745	0.737	-1.78	-0.154	-0.0711	-1.53	0.727	-0.546	0.364
2.1	-0.906	-0.366	-0.192	0.602										1.09	-0.414	0.872	-0.705	0.044	-1.43	0.231	-0.0464	-1.34	0.517	-0.558	1.13
2.42	-1.85	0.0909	-0.457	-0.656										1.37	-0.348	0.0331	-0.127	-0.327	-1.72	0.528	-0.204	-0.971	0.234	-0.59	1.07
1.7	-1.56	-0.821	-0.0544	-0.0108										1.51	-0.299	0.154	-0.505	-0.123	-1.62	-0.025	-0.228	-0.283	0.625	-0.607	1.14
0.93	-1.61	-0.733	0.0924	-1.13										1.32	-0.00448	-0.0445	-0.46	-0.0286	-1.33	0.353	-0.241	0.0667	0.399	-0.0137	1.06
2.08	-1.77	-0.715	0.535	-0.0525										1.66	-0.175	-0.209	-0.565	0.124	-0.665	1.74	-0.537	-0.272	0.169	0.307	1.05
2.34	-1.49	-0.547	0.0768	0.262										1.48	-0.96	0.357	-0.218	-0.0828	-0.901	-0.111	-0.928	-0.619	0.346	0.383	0.858
1.66	0.916	-0.658	0.267	0.45										1.73	-1.03	-0.333	-0.184	-1.29	-1.04	0.73	-0.791	-0.842	0.386	0.311	0.769
1.14	0.609	-1.07	0.205	0.614										1.72	-0.67	0.503	0.00502	-0.909	-1.55	1.32	-0.61	-0.908	0.268	0.824	0.348
0.951	0.346	-0.72	-0.0246	1										1.1	-0.361	0.195	-0.37	-1.83	-1.17	1.22	-0.606	-0.839	0.872	1.43	0.271
2.01	0.199	-0.25	-0.163	0.711										1.82	-0.0651	-0.508	-0.396	-1.31	-0.654	0.943	-0.444	-0.581	0.305	1.62	0.472
1.98	1.5	-0.804	0.026	-0.523										0.922	0.24	0.405	-0.206	-1.51	-1.46	2.15	-0.293	-0.67	0.571	1.11	0.652
1	0.514	-0.755	0.154	1.38										1.22	0.384	0.619	-0.71	-1.09	-1.72	1.85	-0.422	-1.05	0.427	0.813	0.894
2.03	0.335	-0.207	-0.149	0.596										0.628	0.0502	1.07	-1.14	-0.748	-1.12	1.8	-0.464	-1.38	0.793	1.02	0.338
1.5	-0.148	-0.364	-0.384	0.46										1.24	0.378	0.93	-0.795	-1.24	-1.38	1.45	-0.432	-1.44	2.13	1.4	0.103
0.977	0.691	-0.418	1.09	1.58										0.913	0.364	0.637	-0.907	-0.913	-1.2	2.02	-0.345	-1.02	2.66	1.26	0.0725
1.71	0.874	-0.0548	1.73	1.91										0.281	0.183	-0.112	-0.907	-1.43	-1.05	1.73	-0.273	-0.936	2.15	1.22	-0.68
1.98	-0.198	-0.000873	2.11	1.46										-0.12	-0.156	-0.285	-0.835	-0.944	-1.06	1.75	-0.572	-0.739	2.03	0.795	0.278
1.24	-0.141	0.153	1.53	0.52										0.257	-0.128	-0.122	-0.894	-1.03	-1.63	2.66	-0.526	-0.902	1.97	0.712	-0.57
1.1	-0.302	-0.0657	0.495	-0.681										0.46	0.464	-0.128	-0.77	-0.369	-1.67	1.65	-0.712	-1.33	1.62	0.94	0.0734
1.07	-1.81	0.092	0.427	0.364										0.611	0.478	0.439	-0.853	-0.861	-2.08	1.18	-0.799	-1.7	1.65	0.965	-1.01
1.5	0.128	-0.597	0.0118	-0.669										0.573	0.23	0.0152	-1.16	-0.161	-1.33	1.45	-0.704	-1.59	1.3	0.297	-0.462
1.08	0.541	-0.194	-0.0403	0.59										-0.0789	-0.21	-0.285	-0.769	-0.676	-1.51	0.891	-0.651	-0.881	1.73	0.41	-1.01
1.96	1.9	-0.0733	0.00702	0.932										-0.644	-0.465	0.0941	-0.399	-0.431	-0.863	0.906	-0.504	-1.29	1.16	0.0637	-0.444
2.23	0.139	-0.422	0.65	-0.134										0.366	-0.404	-0.0745	-0.521	-0.00323	-0.936	0.579	-0.471	-1.15	1.5	0.301	-0.196
1.19	0.384	-0.422	0.38	-0.209										2.01	-0.0943	-1.18	-0.536	0.089	-1.3	-0.235	-0.303	-0.689	1.54	0.347	-0.361
2.26	0.419	-0.492	-0.12	-0.0902										2.39	-0.074	-0.0839	-0.457	-0.253	-1.81	0.486	-0.627	-0.786	1.69	0.645	-0.983
1.98	0.948	-0.61	0.243	-0.0737										2.67	-0.0347	-1.18	0.0111	-0.489	-1.48	0.878	-0.759	-0.919	2.03	0.651	-0.602
1.18	0.56	-0.522	0.351	0.54										3.01	0.107	-0.151	-0.356	0.266	-1.46	0.166	-0.495	-1.01	2.37	0.248	-0.212
0.596	-0.124	-0.417	0.713	0.128										3.1	-0.161	-1.03	-0.551	-0.693	-1.3	-0.751	-0.569	-1.07	2.3	0.372	-0.447
1.17	-0.295	-0.533	0.555	0.285										1.54	0.0153	0.286	-0.771	-0.147	-0.656	0.511	-0.468	-1.34	2.55	0.234	-0.63
0.69	0.639	-0.507	0.629	0.107										0.992	-0.114	-0.0948	-0.591	-0.481	-1.3	-0.451	-0.734	-1.44	2.36	0.351	-0.0425
0.405	1.39	-0.401	0.00208	0.147										1.69	-0.314	1.15	0.0212	-0.575	-1.29	-0.7	-0.336	-1.51	2.24	0.379	-0.412
0.783	0.884	-0.295	1.06	-0.381										1.43	-0.454	0.594	-0.676	-0.679	-1.5	-0.511	-0.786	-1.34	1.92	0.626	-0.0755
1.74	0.262	-0.724	0.916	1.28										1.2	0.157	-0.145	-0.431	-1.32	-1.06	-1.41	-0.849	-1.22	1.79	1.92	-0.796
2.49	-0.453	-0.562	0.356	0.322										0.906	-0.0862	-0.826	-0.221	-1.35	-1.47	0.85	-0.823	-1.34	2.38	2.91	-1.65
1.5	0.879	-0.489	0.661	-0.216										1.1	0.749	0.109	-0.0885	-0.674	-1.82	0.207	-0.865	-0.976	2.55	3.37	-1.77
1.26	-0.285	-0.822	1.08	-0.0379										0.77	0.544	-0.315	-0.688	-0.00291	-1.5	-0.573	-1.01	-1.2	2.25	2.9	-0.177
0.102	0.798	-0.865	0.777	0.00681										0.578	0.57	0.371	-0.357	-1.22	-1.21	-0.0961	-1.11	-1.04	2.07	2.8	-0.767
-0.308	1	-0.548	1.15	-1.06										0.234	0.559	0.149	-0.159	-1.09	-0.997	-1.02	-1.06	-1.42	2.27	2.88	-1.22
0.35	-0.602	-0.334	-0.229	0.624										0.408	0.786	-0.0852	-0.0387	-0.438	-0.00182	1.24	-0.468	-1.39	1.84	2.39	-0.45
-0.305	-0.585	-0.535	-0.379	0.28										0.342	0.811	-0.929	-0.38	0.237	0.437	0.441	0.0921	-1.41	2.16	2.05	0.652
0.216	0.371	-0.382	0.449	-0.0194										0.209	0.836	-0.762	-0.572	-0.954	1.49	-0.321	0.204	-1.64	1.89	2.04	-0.0295
0.237	0.686	-0.47	0.429	-0.538										-0.478	0.177	-0.273	-0.684	0.0103	1.23	-0.356	-0.0644	-1.7	1.69	2.09	-0.124
0.0506	0.133	-0.536	0.822	-0.536										-0.0381	-0.598	-0.253	-1.05	-0.0173	1.2	-1.87	-0.119	-1.62	1.55	2.2	0.204
0.658	-1.92	-0.608	0.48	0.463										-0.279	-0.511	-0.721	-0.889	-0.553	0.915	-1.84	0.0134	-1.39	1.46	1.85	-0.118
0.164	0.196	-0.151	-0.259	-0.411										0.108	-0.467	-1.03	-1.05	-0.691	0.376	-1.14	-0.293	-1.47	1.41	1.72	0.526
0.0718	1.02	0.0889	-0.596	0.903										-0.31	-1.3	-1.14	-0.627	-0.207	0.423	-2.29	-0.37	-1.4	1.68	1.42	0.414
0.0248	0.245	0.672	-0.476	0.0874										0.0915	-1.4	0.563	0.0477	-0.126	0.427	-1.06	-0.342	-1.22	1.84	1.66	0.775
1.05	-0.825	0.277	-0.605	-0.945										0.393	-1.11	0.234	-0.0967	0.491	-0.0959	-0.489	-0.375	-1.25	1.87	1.55	-0.0446
1.08	0.558	0.733	-0.254	-0.439										0.224	-1.41	0.263	-0.125	-0.318	-0.391	-0.891	-0.261	-1.09	1.9	1.62	-0.704
1.07	1.94	0.64	-0.00911	-0.319										-0.207	-1.57	0.0669	-0.399	-0.221	-0.0782	-1.14	-0.449	-1.29	2.03	1.4	0.134
0.291	1	0.302	0.179	0.166										-0.162	-0.723	0.249	-0.539	-0.339	-0.277	-0.411	-0.617	-1.37	1.67	1.82	-0.138
0.436	0.703	0.285	0.0858	-0.863										-0.717	-1.44	0.854	-0.853	-0.164	-0.196	0.136	-0.458	-0.747	1.64	2.56	-0.16
1.12	1.13	0.424	0.00143	-0.939										-0.588	-1.13	1.42	-0.304	0.735	-0.59	-0.995	-0.0826	-0.956	1.42	2.4	-0.678
1.8	-0.784	-0.131	-0.0801	-0.828										-0.654	-1.1	1.18	-0.32	0.282	-0.24	-1.24	0.33	-0.481	1.56	2.31	-0.859
1.76	-0.614	0.692	-0.697	0.699										-0.1	-1.09	1.22	-0.35	0.435	-0.592	-0.594	0.49	0.16	1.42	2.03	-0.324
0.803	0.0431	-0.251	-0.425	0.0987										-0.555	-0.912	1.87	0.559	0.952	-0.0932	-0.321	0.101	0.284	0.921	2.3	0.512
-0.0464	0.909	-0.463	0.0632	0.811										-0.53	-1.81	1.4	0.0505	0.397	1.23	-0.261	0.158	0.0436	1.16	2.16	-0.201
1.34	0.263	-0.622	-0.855	1.18										-0.0447	-1.35	1.21	0.176	-0.109	2.19	-0.872	0.015	0.239	1.34	1.85	-0.418
0.903	-0.0643	-0.401	-1.01	0.0236										-0.0333	-0.993	0.427	0.23	0.366	1.72	0.246	-0.0481	-0.19	0.97	1.85	-0.854
-0.63	0.278	-1.25	-1.08	-0.223										-0.696	-1.28	-0.161	-0.208	-0.147	1.96	-1.04	-0.3	0.113	1.46	1.92	-0.587
-0.268	-0.57	-0.804	-1.03	1.52										-0.241	-0.569	0.578	0.205	0.181	1.62	0.0125	-0.315	0.206	1.42	1.94	-0.102
-0.873	0.201	-0.123	-0.8	0.12										0.397	-0.708	-0.476	0.517	-0.227	1.45	-0.875	-0.363	-0.125	1.09	2.8	-0.719
-0.521	0.752	0.0445	-0.924	0.302										0.249	-0.541	-0.219	0.428	-0.0804	1.55	-0.319	-0.201	0.309	1.04	3.06	-0.44
-0.51	1.03	0.334	-0.41	0.312										0.0796	-1.06	-0.684	0.597	0.438	1.11	-0.0603	-0.263	0.48	0.855	3.17	-0.707
-0.489	1.04	0.172	-0.904	0.891										0.785	-0.909	-0.349	0.706	0.277	0.639	-0.647	-0.448	0.317	0.944	2.67	-0.917
-1.58	0.93	0.0505	-0.739	0.13										0.447	-0.876	-0.511	0.365	0.404	0.544	-1.33	-0.347	-0.246	0.759	2.71	-1.39
-0.602	0.801	-0.148	-1.66	-0.426										0.489	-0.737	-0.244	0.831	0.141	0.339	-1.35	-0.127	-0.602	0.512	2.31	-1.41
-0.879	1.31	0.076	-1.46	-0.301										0.566	-0.751	0.142	0.148	-0.354	0.805	-1.44	-0.139	-0.605	0.744	2.62	-0.644
-0.743	0.0382	-0.995	-0.815	-1.04										0.397	-0.654	0.365	-0.222	-0.764	0.49	-0.393	-0.27	-0.437	0.661	2.22	-1.58
1.35	-0.259	-0.987	-0.869	0.767										0.343	-0.734	1.1	0.271	-0.766	0.587	-1.36	-0.229	-0.498	0.683	2.51	-1.12
0.682	-0.0728	-0.583	-0.316	0.108										-0.0355	-0.683	0.964	0.636	-0.342	0.18	-1.16	-0.508	-0.00811	0.992	2.19	-1.45
1.46	0.959	-0.337	-0.546	0.349										0.63	-1.21	0.277	0.418	-1.1	0.0573	-0.19	-0.275	-0.329	0.644	1.94	-1.59
0.397	0.838	-0.674	-1.39	0.588										-0.298	-1.05	0.284	-0.105	-1.25	0.0322	-1.58	-0.525	-0.267	0.354	1.36	-1.01
0.0466	0.364	-0.766	-1.2	1.32										0.23	-1.05	0.944	0.136	-1.41	0.264	-0.279	-0.341	-0.303	0.451	0.992	-1.34
0.214	0.74	-0.577	-0.439	-0.855										-0.346	-0.764	0.228	0.582	-1.34	0.54	-0.563	-0.239	-0.527	0.734	1.43	-1.17
0.833	-0.153	-0.39	-0.627	-0.743										-0.00746	-0.926	0.547	-0.0344	-0.854	0.406	-1.43	-0.293	-0.477	0.588	1.21	-1.05
0.289	0.976	-0.175	-0.272	0.0926										0.208	-1.35	0.203	0.16	-1.21	0.683	-1.67	-0.338	-0.24	0.237	1.12	-1.1
-0.519	0.377	-0.436	-0.699	-0.556										-0.133	-1.23	-0.0792	0.194	-1.77	-0.0155	-2.15	-0.29	-0.495	0.471	1.13	-0.862
-0.335	-0.0555	-0.413	-1.16	-0.069										-0.248	-1.78	0.0393	0.582	-1.96	0.712	-3.12	-0.245	-0.391	0.57	1.06	-1.09
1.29	0.225	-0.0827	-1.39	-0.481										-0.471	-1.12	0.0235	0.638	-1.03	0.52	-2.52	-0.427	-0.214	0.908	0.982	-0.854
0.62	0.522	0.122	-1.25	0.485										-0.594	-0.939	0.371	0.27	-1.77	0.324	-1.94	-0.293	-0.59	0.887	0.8	-0.52
1.45	-0.157	0.683	-1	-0.53										-0.115	-1.28	-0.373	0.245	-1.05	-0.607	-0.318	-0.283	-0.346	1.11	0.866	-0.816
0.424	0.867	0.439	-0.0824	0.624										-0.0765	-0.963	0.581	-0.0731	-1.19	0.0126	-0.541	-0.292	-0.415	1.15	0.806	-1.41
0.93	-1.22	0.875	-0.619	0.202										0.0638	-0.136	0.39	-0.0621	-1.43	-0.559	-1.92	-0.438	-0.328	0.894	0.467	-0.508
-0.191	-0.95	0.596	-0.566	0.708										-0.0308	-0.417	0.425	0.716	-0.746	-0.321	-0.17	-0.765	-0.0865	1.03	0.551	-1.07
-0.703	1.18	0.525	-0.855	0.585										-0.0186	-0.278	0.314	0.248	-0.618	-0.207	-0.377	-0.964	-0.206	0.661	0.575	-1.57
-0.307	0.682	0.44	-1.56	0.504										-0.175	-0.311	-0.111	0.628	-0.832	-0.285	-0.567	-0.914	-0.439	0.832	0.639	-1.5
0.364	0.0374	0.519	-0.48	-0.875										-0.178	-0.274	-0.34	0.322	-0.991	-0.263	-1.85	-0.868	-0.71	0.578	0.468	-1.79
0.883	-1.55	0.703	0.0233	-0.209										-0.185	0.21	-0.221	0.396	-0.655	-0.0585	-1.25	-0.174	-0.133	0.558	0.807	-1.86
-0.0145	0.271	0.618	0.175	-0.966										-0.386	0.342	0.153	-0.0735	0.283	-0.083	-1.51	-0.0796	0.427	0.351	0.484	-1.31
-0.0236	0.899	0.659	0.903	-0.407										-0.228	0.0394	-0.435	-0.428	0.644	-0.188	-2.39	-0.215	0.541	0.643	0.313	-1.12
-0.312	-0.0583	0.566	-0.0159	0.935										-0.463	-0.472	-0.45	-0.515	0.271	-0.405	-1.52	-0.53	0.355	0.69	0.451	-1.5
0.453	-0.141	0.509	-0.239	0.0117										-0.291	-0.554	-1.32	-0.987	-0.251	-0.211	-2.41	-0.539	0.248	0.599	0.0898	-1.43
0.605	-0.0329	0.627	-0.76	-0.443										-0.908	-0.496	-0.79	-0.655	-1.08	0.536	-0.379	-0.402	-0.000241	0.573	-0.13	-1.03
0.727	0.98	0.683	-0.783	0.243										-0.36	-0.342	-1.23	-0.327	-0.375	0.209	-0.0106	-0.308	-0.234	0.534	0.185	-1.53
0.52	-0.412	0.597	-1.13	-0.0867										-0.523	-0.674	-0.966	-0.694	-0.0633	0.0487	0.777	-0.401	-0.444	0.599	0.0483	-1.56
0.184	0.964	0.979	-1.06	0.825										-0.258	-0.0782	-1.34	-0.64	-0.192	0.225	1.53	-0.504	-0.464	0.579	-0.275	-1.18
0.172	-0.137	0.869	-0.773	-0.655										-0.497	0.0392	-0.447	-0.784	0.22	0.612	-0.374	-0.605	-0.22	0.622	-0.329	-1.64
0.296	-1.31	0.864	-0.683	0.363										-0.602	0.306	-0.929	-0.702	-0.875	1.63	-0.712	-0.767	-0.357	0.741	-0.326	-1.22
-0.0677	-2.34	1.05	-0.787	0.734										-0.669	0.0386	-0.283	-0.393	-1.24	1.64	-0.819	-0.781	-0.0397	0.478	-0.573	-1.82
0.307	1.33	0.852	-0.911	1.49										-0.201	0.152	-0.245	-0.278	-1.19	1.93	-0.271	-0.81	-0.182	0.482	-0.776	-1.69
0.896	-0.572	0.447	1.11	-0.88										-0.769	0.351	-0.656	0.0535	-1.35	1.15	0.379	-0.51	-0.557	0.682	-0.505	-1.22
0.0615	-0.372	0.671	1.56	0.557										-1.15	0.0859	-0.833	-0.203	-1.35	1.19	-0.676	-0.867	-0.227	0.561	-0.402	-1.51
-0.0905	-1.12	0.309	1.12	0.6										-1.12	0.836	-1.22	0.171	-0.233	1.32	-0.923	-0.785	-0.245	0.399	-0.356	-1.24
0.0084	1.25	0.423	1.38	0.74										-0.705	0.109	-1.88	0.00755	-0.793	0.966	-0.91	-0.909	-0.292	0.517	-0.404	-1.63
0.151	-0.218	0.418	0.38	1.28										-0.966	0.803	-1.65	-1.17	-1.08	1.14	-0.17	-0.555	-0.758	0.589	-0.374	-1.37
0.403	0.36	0.41	-0.297	-0.248										-1.02	0.978	-0.922	-1.24	-0.457	0.725	-0.00234	-0.728	-0.461	0.361	-0.37	-1.42
-1.73	1.05	0.286	0.448	0.0676										-0.786	0.482	-1.02	-0.579	-0.00889	0.893	-0.443	-0.746	-0.619	0.475	-0.25	-1.7
-0.43	-0.846	0.205	0.15	0.413										-0.477	0.826	-0.976	-0.533	0.0784	0.68	-0.737	-0.77	-0.0747	0.148	-0.407	-1.65
0.227	-0.578	0.605	0.292	0.591										-0.125	0.245	-1.97	0.063	-0.301	0.506	-0.614	-0.849	0.00847	0.152	-0.426	-2.01
-0.306	-0.0828	0.854	0.52	1.08										0.502	0.195	-0.944	0.516	0.462	0.666	0.44	-0.973	0.662	0.0542	-0.581	-2.05
-0.994	-0.216	0.598	-0.581	-0.0423										-0.259	-0.245	-1.49	0.851	-0.965	0.291	0.0151	-0.97	0.646	0.164	0.243	-2.32
-0.11	-0.528	0.559	-0.381	0.148										-0.323	-0.017	-0.673	0.883	-0.716	0.0495	0.324	-0.91	0.762	0.321	-0.0493	-1.53
-0.143	-1.04	0.488	-0.649	0.467										-0.789	0.0535	-1.31	0.133	-0.572	0.638	0.868	-0.964	1.44	0.549	-0.461	-1.05
-0.536	-0.37	0.748	-0.00482	0.56										-0.0968	-0.823	-1.33	0.418	-0.344	0.263	-0.957	-1.19	2.17	0.292	-0.789	-0.887
-0.677	-0.456	0.294	0.0267	0.849										-0.0742	-0.29	-0.826	0.384	-0.201	0.757	-1.27	-1.24	3.41	0.225	-0.613	-1.58
-0.287	0.322	0.865	0.0857	-0.464										-0.11	0.347	-1.83	0.412	0.178	0.171	-0.0366	-1.3	3.17	0.263	-0.832	-1.6
-0.386	-0.629	1.35	1.73	-0.543										-0.433	0.36	-1.25	0.544	-0.69	0.163	-0.836	-1.12	3.12	0.15	-0.137	-1.16
0.538	-1.12	-0.0483	0.808	0.0103										-0.212	-0.155	-1.48	0.922	-0.622	-0.308	-0.224	-0.889	2.54	0.214	0.747	-0.425
0.503	-0.6	0.102	0.602	0.135										-0.783	0.0349	-1.21	0.933	-0.239	-0.468	-0.872	-0.786	2.42	0.248	1.27	-0.518
0.558	-0.895	0.0922	0.421	1.08										-0.324	-0.669	-0.276	0.983	0.0613	-0.343	-0.471	-0.817	2.16	0.121	1.35	-0.952
-0.477	0.191	-0.000351	0.319	1.34										-0.852	-0.684	-1.13	1.07	-0.681	-0.192	0.106	-0.694	1.93	0.262	0.946	-1.01
-0.0667	0.27	-0.0959	0.27	0.00438										0.506	-0.951	-1.3	0.918	-0.0362	-0.197	-1.26	-1.08	1.73	0.533	0.662	-1.04
0.817	1.17	-0.403	0.227	-2.08										1.09	-0.964	-0.838	0.984	-0.169	-0.99	-0.484	-1.33	2	0.364	0.607	-0.744
1.34	0.438	-0.458	0.527	-0.621										1.19	-0.796	-1.44	0.682	0.344	-0.703	-0.395	-1.21	1.8	0.389	0.136	-0.693
0.998	-0.345	-0.937	-0.153	-0.942										1.1	-0.923	-0.932	1.72	0.692	-0.644	-0.312	-1.04	1.41	0.515	0.421	-1.2
0.394	0.152	-1.36	-0.279	-1.78										0.498	-1.57	-1.09	2.13	0.216	-0.461	-0.0976	-0.819	0.902	0.46	0.0548	-1.2
-0.141	0.929	-0.907	0.33	-0.818										0.477	-1.17	-0.931	2.6	-0.442	-1.15	-0.121	-1.08	1	0.149	0.0522	-0.72
1.25	-0.0417	-0.475	0.645	0.962										0.412	-1.12	-1.39	2.45	1.21	-0.611	-0.478	-1.04	1.01	0.37	0.0787	-1.42
-0.018	0.895	-0.801	0.633	0.204										0.747	-0.741	-1.78	1.65	-0.476	-0.698	-0.00378	-1.05	0.94	0.325	0.0531	-1.07
-0.581	0.361	-1.1	0.777	0.628										0.557	-0.936	-1.59	1.23	0.00174	-1.12	0.191	-1.22	0.684	0.144	-0.108	-0.757
-0.957	0.311	-0.787	0.828	-0.452										0.543	-0.957	-1.95	0.789	0.797	-0.951	-0.198	-1.04	1.29	-0.263	0.119	-0.925
-0.407	-0.159	-0.636	-0.122	-0.117										-0.00535	-0.667	-1.61	0.859	-0.223	-1.52	-0.462	-1.25	1.34	-0.314	0.0621	-1.29
-0.36	0.8	-0.95	-0.187	-0.0338										0.262	-0.823	-1.44	0.935	-1.05	-1.48	0.685	-1.17	1.14	-0.324	0.0794	-0.344
0.271	0.095	-0.956	0.175	0.494										-0.28	-0.311	-1.28	1.23	-0.452	-1.16	-0.553	-0.997	1.41	-0.16	0.393	0.137
-1.38	0.608	-0.701	0.522	0.468										-0.197	-0.332	-1.11	0.597	0.0276	-1.28	0.108	-0.8	2.41	-0.535	0.326	0.406
-1.43	0.532	-0.877	-0.0911	-1.58										-0.151	-0.306	-1	0.79	0.832	-1.16	0.188	-0.679	2.61	-0.26	0.175	0.000782
-1.8	0.88	-0.739	0.481	-0.942										0.0729	-0.677	-1.63	1.15	0.687	-0.71	0.61	-0.849	2.36	-0.281	0.145	0.404
-1.3	0.203	-1.03	-0.0676	-1.3										-0.182	-0.759	-1.82	1.3	0.304	-0.424	1.09	-0.971	2.24	-0.155	-0.0614	0.261
-1.32	0.725	-1.22	-0.777	-1.98										0.709	-0.182	-1.09	0.921	-0.47	-0.00881	0.849	-1.02	1.9	-0.397	0.126	-0.284
-1.03	0.996	-1.24	-1.32	-0.786										0.909	-0.54	-1.66	1.5	0.0525	0.00773	-0.799	-1.27	1.53	-0.423	0.339	-0.742
-0.899	0.0169	-1.01	-0.626	-1.48										1.04	-0.402	-1.51	0.905	-0.98	0.0123	0.0649	-1.1	1.18	-0.213	0.866	-1.08
-0.718	-0.0814	-1.18	-0.852	-1.31										0.779	-0.417	-1.45	1.27	-0.857	0.106	1	-0.726	1.41	-0.336	1.01	-0.732
-1.32	0.265	-1.02	-0.0461	-1.47										1.16	-0.568	-1.09	0.57	-0.323	-0.336	0.0844	-1.05	1.53	-0.233	0.893	-0.514
-1.72	-0.0683	-1.07	0.423	-0.0798										1.79	-0.811	-1.14	0.852	0.145	-0.243	-0.422	-1.09	1.32	-0.461	0.922	-0.968
-0.336	-2.14	-1.38	0.286	-1.24										2.1	-0.61	-0.631	1.25	-0.000415	-0.113	-1.79	-0.765	0.972	-0.526	0.983	-1.51
-0.211	-0.392	-1.6	0.175	-1.81										1.78	-0.859	-0.888	1.57	-0.44	-0.191	-1.1	-0.82	1.23	-0.337	0.661	-1.29
0.308	1.44	-1.4	-0.851	-0.89										1.83	-1.24	-1.34	1.9	0.126	-0.306	-2.51	-1.14	1.16	-0.424	0.571	-0.541
-0.323	0.784	-1.72	-0.504	0.316										1.7	-1.46	-1.15	1.51	-0.663	-0.29	-1.92	-1.3	1.59	-0.906	0.638	-1.2
-0.862	0.424	-1.56	-0.598	-0.529										1.67	-0.944	-0.956	1.59	-0.605	-0.335	-1.11	-1.39	1.27	-0.895	0.44	-0.64
-1.2	1.04	-1.5	0.221	0.506										1.86	-0.498	-1.49	1.49	-0.173	-0.975	-1.12	-1.13	1.46	-0.497	0.573	-1.15
-2.29	1.48	-1.68	0.0516	-0.231										1.44	0.512	-1.49	1.5	-0.514	-0.646	-1.03	-1.12	1.38	-0.14	0.164	-1.64
-1.07	-0.818	-1.58	-0.774	2.27										1.91	-0.334	-0.571	1.15	-0.6	-1.04	-1.28	-1.11	1.1	0.108	0.0887	-1.53
-1.92	0.0453	-1.14	-1.19	1.21										1.45	0.187	-0.419	1.26	-0.645	-0.199	-0.903	-0.988	0.959	0.327	0.108	-1.19
-1.04	0.573	-1.11	-0.764	2.02										1.71	-0.165	-0.653	0.918	-0.0498	-0.984	0.421	-0.919	1.04	0.537	0.167	-0.91
-1.67	-0.362	-1.03	-0.186	0.204										1.3	-0.0306	-1.16	0.825	-0.679	-0.88	0.506	0.439	0.937	0.481	0.43	-0.42
-1.47	0.801	-0.602	-0.541	-1.02										0.968	-0.353	-0.565	1.05	-0.314	-0.423	1.48	1.24	1.09	0.379	0.232	-0.413
-1.62	1.17	-0.49	-0.785	-1.68										1.15	0.0984	-0.888	1.22	-0.0814	-0.393	0.945	1.21	1.13	-0.041	0.352	1.55
-1.64	-0.0791	-0.374	-0.471	-1.33										1.01	0.0112	-0.691	0.876	-0.0164	0.784	1.74	1.09	1.15	0.493	0.31	-1.93
-1.55	0.762	-0.338	-0.961	-1.71										0.633	-0.535	-1.09	1.16	-0.791	2.75	0.433	1.36	0.825	0.0913	0.314	-1.93
0.131	-0.48	-0.591	-0.515	0.011										0.857	-0.471	-0.869	0.954	-0.153	2.93	-0.161	1.38	0.53	0.307	0.227	-1.84
0.177	-0.698	-0.574	-0.876	0.103										0.684	-0.736	-0.93	1.77	-1.01	2.99	1.75	1.53	0.368	0.163	0.281	-0.554
-1.26	0.661	-0.522	-0.12	-0.257										0.354	-0.607	-0.37	2.26	-0.688	2.7	1.93	1.59	0.575	0.0693	0.372	-0.851
-2.03	0.126	-0.752	-0.0102	-1.59										0.56	-0.503	-0.529	2.57	-0.561	2.39	1.9	1.19	0.438	0.0511	0.175	-1.17
-1.91	0.0926	-0.865	-0.334	-0.614										0.815	0.232	-1.34	2.4	-0.63	2.43	1.75	1.2	0.701	-0.0579	0.404	-1.87
-1.22	0.537	-1.12	-0.516	0.221										0.665	0.656	-1.16	1.97	-1.77	2.19	1.81	1.12	0.602	0.143	0.00219	-1.14
-1.51	1.15	-0.496	-0.766	0.65										0.495	0.836	-0.563	1.44	-0.99	1.68	2.02	1.32	0.33	0.275	0.0411	-1.26
-0.801	-0.69	-0.642	-1.21	0.83										0.247	0.568	-0.849	2	-0.999	1.41	1.06	1.09	0.478	-0.0406	0.122	-0.609
-0.238	0.643	-0.45	-0.382	-0.821										-0.338	0.186	-0.78	1.47	-0.398	0.901	0.944	0.975	0.74	0.261	-0.275	-1.64
-0.608	-0.0738	-1.01	-0.333	-0.665										-0.183	-0.172	-0.21	1.23	-1.31	1.27	1.92	1.12	0.446	0.13	0.103	-0.284
-0.966	-1.34	-0.724	-0.393	-1.11										-0.264	0.0244	-1.24	0.819	-0.861	1.02	1.61	0.913	0.345	0.0615	0.239	-1.43
-2.19	0.434	-0.853	-0.225	-1.25										-0.567	-0.0893	-1.83	0.356	0.841	1.5	1.37	0.706	0.564	-0.242	0.131	-1.26
-0.96	-0.68	-1.01	-0.561	-1.39										-0.2	0.0192	-1.05	0.564	0.0957	1.23	1.07	1.18	1.09	0.0846	-0.0935	-1.54
0.382	-0.822	-0.942	-1.26	-0.713										-0.294	-0.0895	-1.38	0.285	-0.686	1.77	1.56	2.75	1.75	0.0722	-0.474	-0.497
0.761	-0.201	-1.45	-1.57	-0.729										0.195	-0.0966	-1.94	0.727	-0.0175	1.34	0.283	3.05	1.78	0.23	-0.532	-0.589
-0.423	-2.06	-1.06	-1.3	0.142										-0.363	-1.01	-1.48	0.676	0.516	1.26	0.147	3.1	1.29	0.0457	-0.47	-0.883
-1.13	1.23	-0.721	-0.805	-0.304										0.268	-1	-0.986	1.18	0.44	0.775	-0.171	3.17	1.32	-0.0097	-0.331	-0.638
-0.116	1.42	-0.682	-0.412	0.156										0.0884	0.0271	-1.73	1.07	0.63	0.568	0.182	3.38	1.08	0.186	-0.389	-0.784
-1.16	1.52	-0.864	-0.0337	0.149										0.242	-0.16	-1.79	0.788	-0.651	0.358	-1.23	3.31	1.08	-0.126	-0.309	-0.641
-1.14	-0.319	-0.515	-0.551	1.23										0.234	0.262	-1.31	0.971	0.61	0.539	-0.313	3.06	1.04	-0.229	0.384	-1.09
-0.982	-0.836	-1.03	-0.425	0.92										0.261	0.97	-1.02	1.13	0.39	1.34	-0.343	3.12	0.877	-0.286	-0.0424	-1.19
-0.676	1.5	-0.851	0.57	0.0227										0.204	1.49	-1.36	1.31	0.507	1.21	-0.448	3.06	0.921	-0.348	-0.201	-0.804
-1.85	1.22	-0.655	-0.5	-0.274										0.473	2	-1.9	1.41	0.271	1.41	-0.35	3.5	0.668	-0.215	-0.0196	-0.736
-1.55	0.556	-0.529	0.0443	0.25										-0.0831	2.23	-1.42	1.38	-1.11	1.05	1.13	3.37	0.53	-0.0864	0.343	-0.796
-0.946	1.64	-0.731	-0.124	0.521										0.158	1.59	-1.92	0.502	-1.17	1.27	0.956	3.34	0.0982	-0.269	0.0355	-0.678
-1.29	-0.549	-0.433	-0.466	0.0807										0.0144	1.8	-0.85	0.859	-0.801	2.54	0.652	3.23	0.466	-0.583	0.408	-0.867
-1.97	-0.404	-0.399	-0.343	0.167										0.197	2.1	-0.819	0.972	-0.355	2.57	1.15	3.22	0.736	-0.405	0.219	-0.705
-0.851	0.682	-0.678	-0.439	0.138										0.216	1.88	-1.33	1.23	-0.506	1.94	1.1	2.88	0.955	-0.482	0.576	-1.16
-1.14	-0.309	-0.601	0.169	0.263										0.206	1.62	-1.56	0.974	-0.386	1.97	1.38	3.09	0.733	-0.597	0.361	-0.688
-2.48	-0.0115	-0.684	1.52	-0.318										-0.105	1.22	-0.147	0.876	-0.17	1.64	1.4	3.1	0.689	-0.751	0.254	-0.356
-0.949	-1.75	-1.02	0.825	-0.967										-0.262	0.554	-0.577	1.07	1.07	1.29	2.07	2.82	0.35	-0.643	-0.255	-0.337
-0.887	-0.355	-1.06	0.793	-0.149										-0.202	0.451	-1.46	0.944	0.0312	1.43	1.83	2.8	0.643	-0.52	-0.0446	-0.189
-1.4	-0.606	-1.2	0.545	-1.53										-0.417	0.863	-1.48	1.13	0.58	1.42	1.87	2.82	0.823	-0.391	0.0837	-0.458
-0.74	0.427	-1.21	0.365	-0.698										0.259	0.54	-1.07	0.886	-0.175	1.22	0.781	2.42	0.78	-0.539	0.521	-1.46
-0.856	-0.102	-1.25	-0.118	-0.701										0.386	-0.553	-1.55	1.31	0.115	0.84	0.862	2.58	0.975	-0.482	0.0669	0.0418
-0.469	-0.0575	-0.973	0.0245	-0.00987										0.278	-0.772	-0.482	1.76	-0.352	0.606	0.747	2.26	0.418	-0.406	-0.211	-0.51
0.383	-1.01	-1.37	0.391	-0.504										0.373	-0.686	-0.55	1.76	0.259	1.01	1.8	2.3	0.452	-0.299	0.019	0.342
-0.575	0.155	-1.09	-0.0203	0.278										-0.0413	-0.298	-0.907	1.85	-0.0419	0.762	1.03	2.51	0.428	-0.518	-0.285	-0.578
-0.974	-0.0786	-1.38	0.591	1.27										0.301	-0.595	-1.41	1.62	-0.586	0.944	1.55	2.36	0.316	-0.458	-0.109	0.184
-0.431	-0.297	-0.426	0.725	0.39										-0.0987	-0.207	-0.963	2.08	0.37	0.776	1.02	2.23	0.421	0.28	-0.443	-0.27
-0.751	-1.71	-0.739	0.525	0.675										0.483	0.356	-2	1.65	0.323	0.724	1.09	2.08	0.647	1.53	-0.3	-0.131
-0.857	0.197	-0.603	-0.0614	-0.185										-0.241	0.403	-1.64	2.06	-0.029	1.02	0.493	1.96	0.785	2.16	-0.333	-0.731
-0.0906	-0.297	-0.861	0.207	-0.437										-0.593	0.971	-1.19	2.24	-0.153	0.858	2.06	2.03	0.646	2.14	0.324	-0.626
-0.52	0.504	-1.33	0.385	-0.33										-0.718	0.687	-1.59	2.71	-0.147	1.19	0.29	2.12	0.56	2.21	0.211	0.0239
-0.139	-1.15	-1.32	0.813	-0.674										-1.04	0.628	-0.982	2.67	-0.705	1.27	-0.907	1.94	0.5	1.75	0.122	-0.305
-0.0891	0.0625	-1.17	2.01	-0.319										-1.01	0.801	-1.29	2.52	-0.761	1.2	-1.19	1.78	-0.0304	1.85	0.185	-0.442
-0.0107	-0.924	-0.754	3.79	-0.957										-0.141	0.38	-0.82	2.74	-0.568	0.0889	-0.837	1.5	-0.253	2.41	-0.0746	-1.05
-0.747	-0.212	-1.13	3.7	-0.094										0.201	0.956	-0.889	1.73	0.348	0.722	-0.407	1.82	-0.312	2.35	-0.0531	-0.468
-0.732	-0.254	-1.24	3.14	-0.9										0.488	0.644	-1	1.95	-0.00636	0.799	-0.264	1.49	-0.227	2.41	-0.14	-0.405
-0.459	-0.64	-0.837	3.6	0.0816										0.0608	1.37	-0.616	1.93	-0.532	0.269	0.316	1.39	0.0933	1.81	0.318	0.219
-0.166	-0.538	-1.19	2.51	0.115										0.565	1.56	-0.981	2.05	-0.633	0.34	0.75	1.15	0.779	1.54	0.818	0.283
0.194	0.00886	-0.868	1.91	-0.205										0.314	1.82	-0.929	2.32	-0.215	0.694	1.16	1.02	1.96	1.66	0.986	1.28
0.629	1.12	-1.47	2.52	0.0215										0.44	1.5	-0.704	1.64	0.0716	1.17	0.879	1.02	2.52	1.43	0.498	0.853
0.639	0.868	-1.53	1.71	0.253										0.686	1.06	-0.391	1.84	-0.803	0.766	0.69	1.51	2.46	1.64	0.0665	1.6
0.363	1.72	-1.23	1.23	0.657										0.804	0.841	-0.349	1.22	-0.833	0.983	0.108	1.24	2.56	1.3	0.383	1.17
-0.0963	-0.384	-1.26	1.59	0.631										0.599	0.751	-0.287	1.57	-0.267	0.727	-0.546	1.28	2.48	1.4	0.272	-0.0688
0.518	0.21	-1.88	0.675	-0.402										0.931	0.387	-0.917	2.29	0.509	0.784	-0.29	1.03	2	1.35	0.134	0.255
0.11	-0.728	-1.47	0.557	-0.364										0.549	0.321	-0.858	1.94	0.277	0.492	-0.218	0.517	1.84	1.18	0.316	-0.258
0.548	-0.873	-1.48	0.626	0.222										0.647	0.211	-0.867	0.949	-0.196	0.528	-1.43	0.977	1.8	1.37	0.165	-0.011
0.0736	0.186	-1.64	0.432	-0.464										0.491	0.267	-0.584	0.714	0.768	0.159	0.816	1.28	1.64	1.02	0.13	-0.328
0.332	0.149	-1.33	0.00623	-1.18										0.107	0.211	-1.13	0.863	0.478	-0.0417	1.96	1.11	1.33	1.4	-0.11	0.256
-1.64	-0.327	-1.72	0.432	-1.15										0.2	0.758	-0.555	0.745	-1.26	0.454	2.48	0.621	1.44	1.23	-0.011	0.0933
-1.38	-0.873	-0.954	0.79	-0.442										0.264	-0.0686	-0.694	0.406	-1.48	0.405	1.51	0.556	1.11	1.14	0.338	-0.0414
-1.06	0.462	-1.23	0.24	0.722										1.02	-0.0733	-1.73	-0.087	-0.112	0.816	0.195	0.665	1.59	1.24	0.312	-0.0405
-1.09	0.615	-1.15	0.329	0.264										1.54	-0.0932	-0.463	-0.24	-0.412	0.718	-1.57	0.551	1.53	0.994	0.72	0.197
-1.1	0.512	-1.69	0.647	0.533										1.24	-0.104	-0.607	0.193	-0.486	0.641	-1.11	0.384	1.47	0.898	0.327	0.536
-1.18	0.988	-1.55	0.332	-0.011										1.14	0.68	-0.341	0.513	-0.768	0.839	0.0191	0.321	1.32	1.16	0.727	1.53
-1.59	0.64	-1.39	0.0256	0.0162										1.2	0.683	-0.396	0.638	-0.936	1.36	0.462	0.332	1.54	0.958	-0.076	1.58
-1.12	0.149	-1.27	-0.0706	0.0588										1.12	0.914	0.147	1.16	-0.745	0.833	0.218	0.315	1.53	0.906	0.019	1.42
-0.858	1.21	-2.18	0.202	0.453										1.23	2.21	-0.0824	0.67	-0.253	0.86	0.507	0.498	1.21	0.472	0.0073	1.09
-0.908	-0.784	-1.75	-0.21	-0.132										0.501	2.7	-0.559	0.879	-1.21	1.69	1.62	0.81	1.02	0.67	-0.0875	1.06
-0.378	1.64	-1.14	-0.013	0.0581										0.898	2.3	-0.581	0.9	-0.46	2.34	-0.0869	0.742	1.22	0.737	-0.183	0.779
-0.442	0.703	-1.48	-0.0538	-0.289										0.792	1.99	-0.965	0.504	0.0824	2.6	-0.503	0.654	1.44	0.662	-0.275	1.13
-0.632	0.759	-0.482	0.553	-0.811										1.32	1.71	-0.287	0.541	0.146	2.41	-0.279	-0.0979	1.53	0.389	-0.0421	1.02
-0.129	-0.0854	-0.72	0.762	-1.42										0.883	1.28	-0.47	0.449	-0.372	2.17	0.578	-0.0518	1.37	0.385	-0.128	1.13
0.364	0.857	-0.403	2.1	-0.393										0.956	1.06	-0.0934	0.484	0.477	2.24	0.79	0.0434	1.35	0.23	-0.336	0.87
-0.579	1.32	-0.546	2.75	0.0195										0.865	0.711	-0.495	0.37	0.619	2.05	0.58	0.114	1.29	0.583	-0.328	0.673
-1.33	-0.165	-0.821	3.28	0.494										0.856	0.681	-0.735	1.01	-0.715	1.72	0.759	0.0844	1.13	0.59	-0.431	0.3
-1.04	0.058	-0.393	2.09	0.686										0.489	0.531	-0.764	0.986	-0.368	1.15	-0.14	0.129	0.638	0.556	-0.295	0.494
-0.199	-0.41	-0.276	1.79	-0.0631										0.738	1.1	-0.486	0.421	-0.441	0.831	0.22	0.241	0.632	0.46	-0.521	0.129
-0.399	-0.0655	-0.198	1.96	-1.24										0.333	1.13	-1.29	0.542	-0.13	0.867	-0.429	0.41	0.986	0.598	-0.619	-0.0381
0.602	0.409	0.575	2.12	0.1										0.599	0.674	0.0501	0.748	0.369	0.475	0.0631	0.13	0.854	0.23	-0.849	0.366
0.0309	1.07	0.0241	2.41	0.845										0.486	0.994	-0.436	0.413	0.103	0.308	0.825	0.239	0.895	0.0386	-0.672	-0.0841
-0.0566	1.4	0.00149	2.03	-0.231										0.256	1.09	-0.573	0.411	1.02	0.685	1.4	-0.204	1.21	0.0518	-0.873	-0.531
-0.622	0.774	0.18	0.799	0.531										0.418	1.07	-0.273	0.147	-0.362	0.321	0.276	0.232	1.26	0.46	-0.724	-0.988
-0.395	1.22	0.174	0.00476	-0.159										0.175	0.969	-0.32	0.624	0.705	0.527	-0.688	-0.132	1.19	0.219	-0.322	-0.0383
-0.769	0.963	0.175	0.493	0.0744										-0.26	1.19	-0.248	0.742	0.0625	0.0164	-1.31	0.0653	1.28	0.632	-0.695	0.694
-0.0834	0.454	0.229	0.619	-0.34										-0.316	0.611	-0.0447	0.805	0.431	0.389	-1.59	0.0273	1.04	1.12	-0.482	-0.117
1.3	1.68	-0.0103	0.288	-0.811										-0.129	0.839	0.476	0.174	1.27	0.295	-0.148	0.171	1.1	0.836	-0.551	0.025
0.45	0.961	0.144	0.361	-0.747										-0.44	1.25	0.0856	0.276	0.301	0.156	0.537	0.392	0.96	0.612	-0.503	0.0853
-0.231	1.27	0.306	0.226	0.769										-0.239	1.04	-0.51	0.323	0.395	-0.471	0.085	0.0735	1.14	0.41	-0.63	-0.655
-0.967	0.0939	-0.347	0.474	1.43										-0.435	0.535	-0.618	-0.167	0.0741	-0.841	-1.29	0.178	0.82	0.319	-0.445	-0.243
-1.05	1.67	-0.39	-0.495	1.16										-0.591	0.564	-0.516	-0.322	0.532	-0.325	-1.66	0.1	0.908	0.187	-0.908	0.448
-1.83	0.0387	-0.61	0.147	-0.0358										-0.129	0.862	-1.08	-0.81	-0.0322	-0.189	-1.12	0.134	1.55	0.187	-0.595	1.04
0.212	0.86	0.205	-0.48	-0.353										0.34	0.489	-0.681	-0.5	0.256	-0.211	-1.63	-0.14	2.19	0.228	-0.786	1.09
-0.619	0.975	-0.276	-0.448	-0.0463										0.284	0.354	-0.677	0.466	-0.417	0.188	-2.04	-0.0431	2.04	-0.0605	-0.723	1.24
-1.13	1.86	-0.391	-0.744	-1.05										0.153	-0.353	-0.669	0.1	-0.487	-0.0438	-1.54	-0.0384	1.5	-0.0118	-0.735	1.06
0.108	1.79	-0.622	-0.455	-0.441										-0.105	-0.438	0.281	0.202	0.0396	-0.00849	-1.55	-0.117	1.51	-0.321	-0.705	0.395
-0.541	0.62	-0.42	-0.934	0.959										-0.361	-0.511	1.58	-0.0519	-0.654	0.261	-0.689	-0.262	1.47	0.0909	-0.874	-0.231
-0.834	-0.434	0.0575	-0.614	0.891										-0.0831	-0.747	0.868	-0.373	-0.32	-0.0213	-0.613	-0.282	1.38	0.362	-0.933	0.52
-0.731	1.04	-0.0558	-0.481	0.53										-0.168	-0.432	0.597	-0.627	0.524	0.0282	-0.705	-0.378	1.38	0.329	-1.26	0.718
-0.879	0.239	-0.274	-0.325	0.258										-0.451	-0.659	-0.134	-0.587	-0.281	0.224	-1.33	-0.506	1.15	0.631	-1.05	0.808
0.425	0.386	-0.279	-0.303	-1.69										-0.138	-0.339	0.993	-0.636	0.92	-0.482	-1.2	-0.381	1.01	0.682	-1.19	0.672
0.213	1.18	-0.417	-0.204	-0.035										-0.303	-0.628	0.373	-0.43	0.869	-0.651	-0.141	-0.134	0.863	0.451	-0.781	-0.00812
-0.975	0.104	-0.568	0.173	-1.36										-0.402	-0.16	-0.218	0.356	0.506	-0.247	-0.351	-0.154	0.584	0.188	-0.903	-0.408
-0.578	-0.597	-0.374	-0.736	0.633										-0.846	-0.357	0.356	0.0283	1.15	-0.556	-0.453	-0.18	0.64	0.171	-0.939	-0.627
-0.0699	-0.246	-0.308	-0.569	1.38										-0.314	-0.29	0.83	-0.109	1.34	0.0202	-1.44	-0.201	0.813	0.317	-1.04	0.191
-1.79	1.97	-0.26	-0.0618	-0.0116										-0.422	-0.506	0.905	0.311	1.18	-0.58	-0.438	0.159	0.754	0.0924	-1.16	-0.143
-1.91	0.486	-0.131	-0.551	-0.547										0.0537	-0.85	0.246	-0.227	2	-0.843	-1.99	0.162	0.805	0.193	-1.17	-0.456
-1.15	1.29	0.506	-1.18	-0.254										-0.302	-0.836	0.426	-0.202	0.468	-0.305	-0.809	0.316	0.895	-0.0056	-1.11	0.00136
-0.804	1.06	0.331	-0.891	0.299										-0.184	-0.751	-0.258	-0.547	0.156	1.59	-0.988	0.271	0.862	-0.0523	-1.49	-0.786
-1.36	-0.364	0.623	-0.783	0.558										-0.0977	-0.282	1.4	-0.286	0.268	2.44	-1.26	-0.0621	0.891	-0.0217	-1.23	-0.447
-1.07	0.998	0.804	-1.11	-1.27										-0.493	-0.403	2.82	0.19	1.28	2.26	-0.78	0.0548	0.702	-0.0628	-1.24	-0.303
-0.831	0.0441	0.66	-0.395	-0.623										-1.03	-0.158	1.87	-0.376	-0.206	1.83	-0.766	0.123	0.528	0.0941	-1.39	-0.3
-0.291	0.431	0.418	-0.0518	-0.591										-0.931	-0.254	2.45	0.0998	0.119	1.82	-1.29	-0.319	0.363	-0.112	-1.24	1.18
-0.696	0.41	0.636	-0.024	0.271										-0.804	-0.765	1.88	-0.00732	0.161	0.74	-0.97	-0.625	0.114	-0.152	-0.942	1.54
-0.727	-0.19	0.523	-0.243	0.877										-1.21	-0.409	1.78	-0.201	0.249	1.51	-0.325	-0.455	-0.0454	-0.258	0.0341	1.51
-0.031	0.941	0.385	-0.548	0.287										-1.39	0.552	1.93	-0.717	0.716	1.27	0.366	-0.252	0.241	-0.0955	-0.218	1.14
-0.41	1.81	0.621	-0.684	0.113										-1.11	0.68	2.02	-0.372	0.341	1.23	-0.119	-0.291	0.324	-0.387	-0.18	1.8
-0.323	1.43	-0.0388	-1.13	-0.764										-1.19	0.74	1.23	-0.403	0.0902	1.06	-0.11	-0.469	0.117	-0.143	-0.161	1.75
-0.921	-0.381	0.314	-0.679	-0.101										-0.851	0.406	0.516	-0.426	-0.82	1.4	0.337	-0.374	-0.238	-0.442	-0.483	1.21
-0.531	1.22	0.029	-0.483	0.71										-1.13	-0.366	1.4	-0.494	-0.117	0.573	0.0187	-0.321	-0.0956	-0.133	-0.528	0.773
-0.908	1.5	-0.708	-0.896	0.848										-0.979	-0.292	1.92	-0.998	0.0253	0.499	-0.0916	-0.484	-0.197	-0.54	-0.637	0.0972
0.138	0.973	-0.0576	-1.05	0.218										-1	-0.492	0.953	-1.04	0.203	0.531	-0.805	-0.532	-0.239	-0.477	-0.212	-0.295
0.605	0.797	-0.0657	-0.587	1.58										-1.3	-0.785	2.18	-1.36	0.583	0.812	-1.48	-0.304	-0.151	-0.337	-0.0511	1.34
0.244	0.459	0.165	-0.0146	0.725										-0.376	-1.26	1.56	-1.48	0.356	0.707	0.164	-0.19	-0.228	-0.0222	-0.136	1.48
0.324	-1.16	0.489	1.42	-1.13										0.0299	-0.74	1.65	-0.993	0.954	0.439	-1.36	-0.0506	-0.515	-0.0932	-0.086	1.02
-0.0434	0.158	0.192	1.77	-1.49										-0.163	-0.711	1.04	-0.694	0.817	-0.173	-0.707	-0.0318	-0.349	-0.07	-0.201	0.926
-0.996	0.773	-0.339	1.58	-0.648										-0.0652	-1.31	1.57	-0.731	0.74	-0.488	-1.08	-0.0801	-0.339	-0.6	-0.263	0.55
-0.557	-1.02	-0.313	1.08	-0.239										0.0588	-0.624	0.737	-0.494	0.349	-0.699	0.257	-0.107	-0.234	-0.407	-0.67	1.46
-1.48	0.943	-0.218	0.28	0.25										0.205	-1.05	0.774	-0.828	0.327	-0.457	-0.176	-0.293	-0.348	-0.391	-0.656	2.01
-1.58	1.62	-0.0895	-0.307	0.226										0.538	-0.85	0.85	-0.535	1.05	-0.631	0.584	-0.11	-0.181	-0.0773	-0.669	0.991
-0.246	0.776	-0.271	-0.798	-1.35										1.96	-1.44	0.858	-1.25	0.154	-0.659	0.0299	-0.192	-0.129	-0.399	-0.59	1.08
-2.21	0.238	0.118	-0.653	-1.85										1.78	-0.784	1.22	-0.985	-0.127	0.223	0.065	-0.316	0.0542	-0.316	-0.709	0.373
-1.2	0.244	-0.65	-0.368	-1.04										1.63	-0.0867	0.824	-1.15	0.193	0.323	-0.484	-0.0722	-0.183	-0.421	-0.951	-0.414
-0.789	0.284	-1.14	0.619	-1.09										1.12	-0.442	0.186	-1.14	-0.214	0.471	-1.16	-0.319	-0.431	-0.278	-0.913	-0.209
-0.834	0.663	-0.456	1.95	-0.542										1.29	-0.425	-0.116	-1.25	0.693	0.549	-1.27	-0.111	-0.614	-0.554	-0.698	-0.268
-0.306	1.91	-0.869	2.97	-0.822										1.22	-1.35	-0.0338	-1.29	0.353	0.516	-0.794	-0.354	-0.697	-0.621	-0.563	1.01
-0.232	1.44	-0.755	3.07	-1.05										0.732	-1.18	0.038	-1.83	0.289	0.027	-0.539	-0.356	-0.683	-0.3	-0.633	-0.0711
-0.133	0.757	-0.91	2.93	-0.79										0.586	-1.33	-0.289	-1.6	-0.216	0.158	0.241	-0.482	-0.822	-0.233	-0.94	0.266
-0.339	0.675	-1.13	2.52	-1.42										0.249	-0.841	-0.233	-2.04	-0.698	0.216	0.335	-0.45	-0.9	-0.535	-0.897	-0.255
-1.13	0.47	-1.01	2.39	-2.36										0.233	-0.127	0.094	-1.54	-0.971	0.425	0.0835	-0.61	-0.509	-0.491	-0.767	-0.686
-0.398	0.211	-1.04	2.33	-2.53										0.19	1.29	0.622	-1.14	-0.0391	0.483	1.2	-0.713	-0.548	-0.612	-0.808	-0.588
-0.568	-0.966	-0.806	1.77	-0.717										0.455	1.7	0.0151	-2.16	-0.137	0.525	0.896	-0.853	-0.256	-0.494	-1.29	-1.27
-0.723	0.272	-0.968	1.64	-0.208										0.63	2.09	0.409	-1.43	-0.685	0.799	0.258	-1.47	-0.397	-0.626	-1.03	-0.0958
-0.0969	1.77	-1.02	1.16	-0.596										0.786	2.34	0.658	-1.29	0.107	0.374	-1.57	-0.961	-0.518	-0.76	-1.31	0.00815
-0.176	1.96	-0.785	0.373	-0.499										1.15	2.09	-0.0167	-1.55	0.0806	-0.237	0.185	-0.624	-0.635	-0.696	-1.18	0.165
-0.184	1.25	-0.908	-0.38	-0.698										1.75	2.01	-0.0328	-1.18	0.0172	-0.566	0.307	-0.761	-0.651	-0.913	-0.993	-0.418
0.315	0.638	-0.747	1.28	1.04										1.29	1.55	0.544	-0.881	0.327	-0.338	0.176	-0.991	-0.788	-0.861	-1.04	0.307
0.527	0.295	-0.952	2.31	-0.201										1.08	1.08	-0.411	-1.4	0.661	0.225	-0.814	-0.957	-0.889	-0.735	-1.37	0.61
1.29	0.969	-0.707	1.6	-0.359										1.27	0.436	-0.139	-1.31	-0.268	-0.653	-0.224	-0.761	-0.919	-1.02	-1.48	1.1
2.87	0.0368	-0.518	1.45	0.143										0.856	0.44	-1.04	-1.74	0.64	-0.806	0.701	-0.527	-0.726	-0.777	-0.971	1.14
1.95	0.932	-0.388	1.22	-0.0676										1.36	0.488	-0.327	-1.27	0.169	-0.551	0.0539	-0.708	-1	-0.596	-1.11	1.59
1.98	0.753	-0.926	1.25	-0.632										1.46	0.996	-0.0395	-1.71	0.693	-0.394	0.0654	-0.504	-0.236	-0.84	-1.2	0.248
0.369	-0.24	-1.06	1.03	0.759										0.628	1.41	0.591	-1.1	-0.217	-0.166	0.141	-0.737	-0.583	-0.882	-1.17	-0.418
0.845	0.53	-0.556	0.996	-0.209										-0.24	1.85	0.273	-0.885	-0.209	-0.0689	0.994	-0.772	-0.294	-0.999	-1.27	-0.505
1.18	0.866	-0.426	1.43	-0.446										0.0522	1.75	0.31	-1.46	0.435	0.346	0.429	-0.805	-0.833	-1.03	-1.46	-0.202
1.26	0.27	0.211	1.05	1.46										-0.0564	1.8	-1.17	-1.5	0.929	0.798	0.597	-0.73	-0.914	-0.78	-1.48	0.732
0.649	0.599	0.0615	1.15	-1.12										0.107	1.78	-0.59	-1.22	0.483	0.122	0.101	-0.581	-1.01	-0.839	-1.43	0.618
0.45	-0.864	-0.222	0.847	0.129										0.0313	0.91	-0.73	-1.36	1.71	-0.12	0.0839	0.539	-1.12	-0.994	-1.64	0.197
1.71	1.34	-0.597	1.1	1.48										0.385	0.791	0.794	-1.05	0.372	0.259	0.195	0.769	-1.06	-1.15	-1.59	-0.0529
1.78	0.0155	-0.189	1.39	1.27										0.302	0.903	0.538	-0.832	1.27	-0.25	0.2	0.981	-0.594	-1.13	-1.57	-0.211
1.6	0.589	0.324	1.96	0.532										0.156	1.05	1.04	-2.31	0.432	0.119	0.368	0.434	-0.638	-1.01	-1.32	-0.143
2.22	1.53	1.53	0.818	-1.05										0.562	0.282	0.46	-2.63	0.538	0.62	-0.0846	0.636	-0.988	-1.02	-1.37	-0.372
1.1	0.692	2.78	0.165	-1.15										0.684	0.255	-0.00445	-1.65	-0.00233	0.281	-0.184	0.468	-1.03	-1.28	-1.78	-0.0176
0.737	0.447	3.27	0.558	-2.35										0.63	-0.0639	0.276	-1.94	0.388	0.736	-0.0617	0.727	-1.11	-1.16	-1.78	-0.0363
0.22	1.02	3.59	0.609	-1.89										0.872	-0.294	0.529	-1.45	0.585	1.07	0.912	0.705	-0.988	-1.18	-1.68	-0.06
-0.0387	-0.262	3.16	0.988	0.333										0.493	-0.123	0.606	-1.39	0.109	1.23	1.66	0.582	-0.682	-1.15	-1.72	-0.729
0.487	0.394	3	0.51	1.16										0.136	-0.608	1.15	-1.01	1.57	0.629	1.33	0.707	-0.627	-1.18	-1.98	-1.62
0.99	-0.0534	2.68	0.11	3.56										0.293	-0.229	0.884	-1.2	1.38	0.649	1.72	0.42	-0.396	-1.24	-1.9	-1.17
-0.14	0.0326	2.79	-0.157	1.29										-0.0744	-0.255	1.19	-1.02	1.62	0.807	1.01	0.481	-0.584	-1.29	-1.82	-0.166
-1.26	-0.303	2.83	-0.311	-0.938										0.0104	-0.325	0.00565	-1.3	0.895	0.699	1.34	0.462	-0.685	-1.22	-1.55	-0.35
0.152	0.303	3.06	-0.0863	0.736										-0.0703	-0.42	0.4	-1.29	1.23	0.146	0.619	0.369	-0.229	-1.29	-1.66	0.0948
0.408	0.553	2.4	0.185	0.498										-0.88	-0.182	-0.113	-1.64	0.495	0.678	1.41	0.351	0.274	-1.12	-1.88	-0.373
0.384	0.0957	2.37	-0.264	-0.285										-0.343	-0.415	0.218	-1.39	1.22	0.447	1.01	0.323	0.647	-1.44	-1.83	-0.537
1.06	1.12	2.15	0.00406	2.17										-0.965	-0.127	1.66	-1	0.105	0.683	-0.097	0.244	0.355	-1.39	-1.91	-0.722
0.737	1.21	1.76	0.264	0.985										-0.573	0.257	3.09	-0.936	0.347	0.522	-0.581	-0.126	0.49	-1.42	-1.88	0.00306
-0.527	1.42	2.19	0.285	1.74										-0.443	0.746	2.26	-0.612	0.351	-0.36	0.271	-0.135	0.548	-1.64	-1.79	-0.501
0.977	0.803	1.63	1.17	0.531										0.0668	0.728	2.52	-1.01	0.567	-0.0206	-0.329	-0.328	0.889	-1.01	-1.28	-0.376
0.498	0.533	1.79	1.28	0.997										0.0223	0.874	2.53	-0.91	0.131	0.104	0.19	-0.0267	0.859	-1.11	-0.977	-0.906
0.303	0.183	1.13	1.43	2										-0.539	1.03	2.92	-0.457	0.0733	0.314	0.0674	-0.07	0.889	-1.33	-1.24	-0.247
0.35	0.215	1.72	0.591	1.36										-0.841	0.999	2.64	-0.315	0.00401	0.749	0.352	-0.0668	0.417	-1.35	-1.13	-0.44
-0.0971	1.35	1.74	0.0327	-0.246										-0.683	0.792	3.66	-0.117	0.52	-0.0415	0.102	0.0114	0.508	-1.41	-1.07	0.471
0.814	-0.379	1.56	0.286	-0.974										-0.405	1.18	3.4	-0.303	0.699	0.654	-0.0396	-0.313	0.524	-1.43	-1.12	0.117
-0.622	1.01	1.3	-0.1	-1.37										-0.374	0.879	2.21	-1.16	-0.00388	1.16	1.19	-0.36	0.591	-1.2	-1.16	0.0481
-0.164	-0.498	1.51	-0.207	-1.33										-0.694	1.06	2.07	-1.11	0.733	0.719	0.83	-0.351	0.533	-1.17	-1.01	-0.0684
-0.507	1.01	1.56	0.399	-1.3										-1.15	0.768	1.25	-1.24	0.984	0.293	-0.506	-0.39	0.208	-1.24	-1.21	0.535
-0.759	-0.33	1.53	0.212	-0.624										-1.33	0.541	0.258	-0.495	-0.101	0.487	0.271	-0.423	0.273	-1.01	-1.31	0.578
-0.975	-0.0886	1.25	-0.0644	0.521										-1.52	0.682	0.345	-0.348	-0.23	0.546	-0.0127	-0.666	0.233	-0.954	-1.12	0.73
-1.09	-0.452	1.28	-0.335	0.676										-1.33	0.669	0.887	0.00979	0.916	-0.146	0.156	-0.425	0.147	-1.29	-1.13	-1.53
-0.843	0.387	1.53	-1.2	-1.27										-1.42	0.0952	0.902	-0.295	0.202	0.496	-0.525	-0.319	0.112	-1.6	-1.32	-0.831
-0.238	0.744	1.7	-0.913	-2.15										-1.25	0.091	0.787	-0.675	-0.155	-0.0839	-0.793	-0.343	-0.0631	-1.15	-1.59	-0.745
-0.234	-0.541	1.61	-0.731	-2.01										-1.21	-0.228	1.36	-0.942	0.655	-0.631	-0.505	-0.506	-0.149	-1.3	-1.21	0.32
0.579	0.474	1.87	-0.722	-0.496										-1.6	0.081	1.09	-0.711	0.928	-0.852	0.636	-0.399	-0.00972	-1.18	-1.11	-0.00956
-0.281	-0.213	1.47	-1.5	-0.128										-0.911	0.112	1.31	-0.242	0.97	-0.952	0.714	-0.621	-0.319	-1.44	-1.24	-1.02
0.191	-0.0684	1.21	-1.19	0.106										-1.56	-0.19	1.03	-0.878	0.767	-0.57	0.727	-0.59	-0.162	-1.33	-1.37	-0.455
-0.748	0.371	1.02	-1.68	0.374										-0.978	-0.621	2.07	-0.693	1.44	-0.623	-0.529	-0.617	-0.458	-1.35	-1.25	-0.0277
-0.46	-0.19	0.652	-1.59	-0.0229										-1.13	0.198	2.46	-1.25	0.62	-0.0975	-0.555	-0.431	-0.531	-1.05	-1.38	0.0204
-0.318	0.726	0.945	-1.75	-0.484										-0.991	-0.18	1.72	-1.51	0.604	-0.182	-0.0923	-0.471	-0.22	-1.41	-1.5	-0.325
-0.354	0.956	0.768	-2.2	-1.52										-1.65	-0.386	1.69	-1.42	1.59	-0.171	0.347	-0.391	-0.466	-1.23	-1.53	-0.537
-0.901	1.1	0.262	-1.28	-2.47										-1.87	0.156	1.7	-1.68	0.898	-0.872	1.16	-0.319	-0.146	-1.26	-1.38	0.405
-1.46	-0.98	0.554	-1.71	-2.09										-1.8	-0.203	0.874	-1.64	2.01	-1.08	1.96	-0.439	-0.697	-1.37	-1.27	0.54
-1.03	1.53	0.128	-1.63	-1.99										-1.74	-0.00908	0.3	-0.929	1.74	-0.612	0.933	-0.587	-0.21	-1.39	-1.06	-0.173
-0.974	-0.847	0.938	-1.17	0.344										-1.16	-2e-05	0.721	-0.621	0.959	-0.786	1.59	-0.711	-0.475	-1.54	-1.41	-0.453
0.442	0.362	1.52	-1.33	0.487										-1.78	0.196	0.549	-1.37	1.26	-1.23	0.524	-0.829	-0.448	-1.65	-1.09	1.31
-0.00308	1.04	0.961	-1.02	-0.828										-1.84	0.717	0.272	-1.41	1.26	-0.62	-0.846	-0.806	-0.593	-1.6	-1.1	1.13
0.12	1.07	1.33	-1.56	-0.796										-1.9	0.659	-0.00553	-1.14	0.42	-0.905	-0.0531	-0.841	-0.437	-1.36	-0.593	1.31
2.14	0.68	1.23	-1.3	-0.919										-1.57	0.086	0.649	-1.17	0.923	-0.757	-0.528	-0.671	-0.12	-1.37	-1.29	1.71
0.133	-0.377	1.39	-1.71	-1.07										-2.01	-0.16	0.446	-1.38	0.365	-0.724	0.272	-0.823	-0.327	-1.19	-1.02	1.02
1.02	1.16	0.989	-1.22	-0.708										-2.4	0.0619	0.965	-1.23	-0.0688	-0.631	-0.301	-0.887	-0.502	-1.33	-1.25	1.1
-0.153	1.59	0.947	-1.48	-0.11										-2.4	0.683	0.139	-0.994	0.0268	-0.554	0.76	-0.932	-0.635	-1.36	-1.14	0.805
-0.14	1.32	0.904	-2.1	-1.28										-1.5	1.25	-0.745	-1.1	-0.424	-0.268	0.953	-1.07	-0.874	-1.57	-1.48	1.25
-0.412	0.0445	0.789	-1.78	-0.702										-1.98	1.04	1.02	-1.24	0.401	-0.942	0.685	-1.29	-0.63	-1.63	-1.3	1.7
-0.842	0.222	0.641	-0.875	0.692										-1.73	1.43	0.202	-1.3	0.637	-0.947	0.888	-1.28	-0.919	-1.73	-1.31	1.48
-0.0802	0.18	0.101	-1.13	-1.16										-1.39	0.62	0.662	-1.89	0.0868	-1.23	-0.67	-1.31	-0.285	-1.77	-1.27	1.84
-0.524	0.231	0.281	-0.954	-0.755										-1.86	0.999	0.351	-1.49	-0.818	-1.09	-0.518	-1.26	-0.158	-1.52	-1.55	1.94
-0.179	0.823	-0.177	-1.31	0.516										-2.44	1.66	0.764	-1.05	-0.691	-1.1	-0.399	-1.54	-0.0287	-1.49	-1.18	2.54
0.913	0.908	0.198	-1.35	-0.946										-2.26	1.19	-0.613	-1.24	-0.712	-0.62	0.277	-1.21	0.0982	-1.42	-1.22	2.48
1.35	0.382	0.263	-1.32	0.705										-1.68	1.83	0.493	-1.5	-0.349	0.102	0.342	-1.26	-0.298	-1.7	-1.18	2.39
-0.478	0.368	0.0915	-0.796	-0.512										-1.76	2.59	0.334	-1.08	-0.599	-0.239	-0.559	-1.08	-0.282	-1.81	-1.67	2
0.953	0.841	-0.146	-1.87	1.56										-1.64	3.06	-0.427	-0.929	-0.277	-0.417	-0.466	-0.973	-0.104	-1.83	-1.6	2.08
0.00377	1.56	0.176	-0.707	0.0136										-1.85	2.95	0.0616	-0.979	-0.394	-0.573	0.751	-0.608	-0.0649	-1.71	-1.66	1.82
-0.313	0.929	0.717	0.0286	0.115										-1.97	3.01	-0.272	-1.1	-0.882	-1.19	0.764	0.33	-0.0471	-1.63	-1.65	2.23
-0.807	1.58	1.14	-0.202	0.927										-2.01	3.28	0.219	-1.04	0.17	-1.12	-0.00292	0.482	-0.323	-1.42	-1.23	2.05
-0.0976	1.89	2.31	-0.581	1.21										-1.24	3.62	0.793	-1.31	-0.0923	-1	0.269	0.545	-0.432	-1.38	-0.952	1.86
-0.236	1.46	3.47	-1.28	0.873										-2.35	2.73	0.371	-0.93	0.0381	-1.01	0.228	0.399	0.00979	-1.38	-0.608	1.72
-0.444	0.204	3.33	-1.39	0.127										-1.2	2.52	0.901	-1.08	-0.745	-1.02	0.358	0.637	0.719	-1.28	-0.979	1.43
-0.479	-0.117	2.96	-0.991	-1.14										-1.88	2.25	0.703	-1.07	-0.649	-0.369	0.25	0.852	0.904	-1.4	-0.278	0.669
-0.328	0.306	3.17	-0.65	0.524										-1.47	2.21	0.202	-1.48	-0.918	-0.746	-0.353	0.816	0.527	-1.46	0.463	0.683
-0.156	0.788	2.85	-0.375	-0.471										-1.79	1.97	0.579	-1.2	-0.879	-1.13	0.0112	0.974	0.677	-1.15	1.04	0.342
-0.475	1.36	2.77	-0.588	0.328										-2.34	1.88	0.132	-1.28	-0.487	-0.518	-1.24	1	0.602	-1.38	1.13	0.82
-0.937	0.189	2.47	-1.51	1.12										-1.86	2.1	0.132	-0.724	3.87	-0.962	0.348	0.758	0.397	-1.35	1.17	0.479
-0.0232	0.451	2.09	-1.72	0.224										-2.47	2.43	0.527	-1.16	6.26	-0.909	-0.622	1.34	0.574	-1.34	1.01	0.547
-0.205	-0.987	2.03	-1.13	-0.455										-2.27	2.17	0.264	-1.18	6.1	-1.02	-0.0247	1.2	0.211	-1.57	0.742	1.05
-0.762	0.399	1.77	-0.603	-0.2										-2.18	2.61	0.22	-1.26	4.86	-0.356	-0.762	1.16	0.516	-1.33	0.842	0.252
-0.779	0.903	1.93	-0.844	0.31										-2.26	2.47	-0.945	-0.969	5.05	-0.414	-0.262	0.897	0.196	-1.26	0.486	0.61
-0.982	1.06	1.86	-1.43	-0.227										-2.32	1.51	-0.488	-0.6	4.62	0.343	0.928	0.91	0.45	-1.52	0.689	0.609
-0.0842	0.166	2.14	-1.63	-0.712										-2.34	1.19	-0.518	-0.852	3.68	0.224	0.235	0.78	0.121	-1.1	0.153	0.643
-0.848	1.29	1.76	-1.55	0.392										-2.52	1.14	-0.233	-0.865	3.08	0.755	1.26	0.974	0.196	-1.39	0.315	1.29
-0.377	0.284	1.67	-1.37	0.232										-2.48	0.43	-0.477	-0.885	3.82	0.201	-0.64	0.546	0.0416	-1.4	0.482	0.812
-0.885	1.08	1.56	-1.26	0.0417										-1.84	0.723	-0.371	-0.566	2.73	0.105	0.413	0.364	-0.187	-1.42	0.411	0.632
-1.51	-0.269	1.61	-0.836	1.09										-2.18	0.362	0.662	-0.801	3.57	0.413	1.35	0.237	-0.0407	-1.51	0.0505	0.136
-1.15	-0.716	1.95	-0.00369	0.374										-2	-0.173	1.01	-0.732	2.67	0.217	0.506	0.269	-0.324	-1.38	0.206	0.185
-0.848	0.535	1.58	0.952	-1.07										-2.08	0.19	0.3	-0.775	3.35	-0.193	0.797	0.0653	-0.695	-1.26	0.32	-0.196
-0.607	0.933	1.29	0.93	-1.29										-2.11	-0.14	0.766	-0.562	3.07	0.182	0.47	0.137	-0.478	-1.37	0.335	0.773
-0.0155	-0.188	1.49	1.56	-2.04										-2.28	-0.268	0.401	-0.459	2.1	0.775	0.771	0.172	-0.646	-1.58	0.24	-0.11
-1.06	0.0177	1.32	1.91	0.297										-1.87	-0.148	0.528	-0.926	1.75	-0.187	0.392	0.409	-0.349	-1.76	-0.00979	0.225
-1.67	-0.56	1.35	1.3	0.0158										-2.29	-0.281	-0.0355	-0.863	1.54	-0.207	1.39	0.319	-0.2	-1.57	0.155	-0.15
-1.81	0.961	1.67	1.58	-0.014										-2.34	-0.154	0.734	-1.04	1.62	0.191	1.65	0.197	-0.283	-1.39	-0.1	-0.0122
-1.13	-0.785	1.87	1	-0.0204										-2.64	-0.894	0.688	-0.946	1.09	0.0235	1.31	0.159	-0.62	-1.39	0.256	-0.393
-1.04	-0.732	1.94	1.26	-0.242										-2.44	0.0659	0.451	-1.08	1.03	0.278	0.657	0.221	-0.563	-1.63	-0.0144	-0.531
-1.65	0.581	1.25	0.461	0.459										-2.62	0.306	0.6	-1.4	1.14	0.299	0.276	0.197	-0.48	-1.69	-0.218	0.394
-1.02	-0.135	1.03	0.605	0.813										-2.67	-0.328	0.853	-1.05	1.29	0.677	1.73	-0.0924	-0.372	-1.36	0.0615	0.698
-2.09	0.0749	1.41	0.424	0.38										-2.42	0.41	1.28	-0.961	0.971	0.745	0.743	-0.00674	-0.797	-1.72	-0.167	0.547
-2.01	-0.0305	1.41	0.0545	0.964										-2.07	0.575	0.346	-1.09	0.369	0.558	-0.176	-0.169	-0.752	-1.39	-0.292	0.436
-1.72	-0.434	1.39	-0.616	0.764										-1.49	0.145	0.698	-0.76	2.32	0.93	-0.237	-0.0647	-0.828	-1.67	-0.338	-0.291
-1.95	0.704	1.24	-0.294	0.412										-1.55	-0.0255	0.233	-1.06	1.72	0.823	0.377	-0.295	-0.543	-1.71	-0.51	-0.0178
-0.7	0.77	0.581	-0.544	1.09										-1.68	-0.0952	1.33	-0.874	0.232	0.204	0.825	-0.348	-0.658	-1.8	-0.659	0.138
-1.41	0.409	0.694	-0.0505	0.621										-1.97	-0.365	0.975	-0.807	0.498	0.336	0.496	-0.207	-0.6	-2	-0.694	0.0639
-1.39	-0.0871	0.409	-0.605	-0.702										-2.34	-0.28	0.651	-0.88	1.32	0.456	-0.299	-0.0222	-0.387	-1.38	-0.484	0.278
-1.14	0.633	0.698	-0.283	-0.659										-2.39	-0.632	0.667	-0.605	1.54	0.385	-1.26	0.194	-0.741	-1.67	-0.242	-0.0623
-1.13	-0.0462	1.35	-0.354	-1.55										-1.76	-0.924	0.637	-0.455	0.574	0.453	0.509	-0.212	-0.656	-1.72	-0.345	-0.0623
-0.934	-0.672	1.45	-0.097	-0.891										-1.58	-0.709	0.355	-0.703	0.45	0.521	0.571	-0.0636	-0.762	-1.63	-0.568	-0.321
-0.34	0.241	1.53	0.0347	-0.749										-1.88	-0.985	0.157	-0.792	1.22	0.471	-1.28	-0.197	-0.399	-1.42	-0.808	-0.123
-1.15	0.0268	0.753	-0.0789	-0.671										-1.64	-0.783	0.773	-0.963	0.649	0.515	-1.01	-0.457	-0.724	-1.73	-0.619	0.188
-1.76	0.428	0.768	-0.413	0.0856										-2.18	-1.01	0.708	-0.682	0.679	0.448	-0.797	-0.427	-0.422	-1.76	-0.671	0.0817
-1.33	0.597	0.616	-1.45	0.0315										-2.53	-0.559	-0.189	-0.865	0.783	0.473	-1.58	-0.234	-0.744	-1.56	-0.931	-0.76
-0.795	0.642	0.753	-1.45	-1.56										-2.38	-0.748	-0.355	-1.01	0.0217	0.518	-1.55	-0.0279	-0.692	-1.5	-1.07	-0.97
-1.52	0.502	0.675	-0.603	-0.483										-2.04	-0.884	-0.706	-0.806	0.394	-0.21	-1.22	-0.284	-0.887	-1.7	-1.11	-1.43
-0.582	-0.932	0.642	0.621	-0.422										-1.77	-1.09	-0.0949	-0.893	0.534	-0.439	-0.871	-0.361	-0.742	-1.41	-0.837	-0.653
-1.51	0.456	0.76	0.159	0.567										-1.85	-0.498	-0.269	-1.15	-0.379	-1.33	-1.24	-0.421	-0.667	-1.69	-0.856	-0.159
-1.43	-0.152	1.24	-0.25	-0.614										-1.42	-1.05	0.148	-1.09	-0.639	-0.849	-1.49	-0.54	-0.745	-1.78	-1.2	-0.662
-0.922	-0.338	1.1	0.308	-0.514										-1.25	-1.28	-0.749	-0.576	-0.834	-0.713	-2.85	-0.619	-0.713	-1.01	-0.872	-0.558
-0.911	-0.012	0.772	-0.191	-0.449										-1.2	-0.921	-0.106	-0.96	-0.247	-0.471	-2.11	-0.275	-0.998	-0.258	-1.22	-1.08
-1.6	-0.632	1.32	0.282	-0.234										-1.47	-1.31	0.291	-0.74	-0.357	-0.75	-1.71	-0.28	-0.631	-0.324	-1.54	-0.926
-1.17	-0.472	0.7	0.0224	-0.391										-2.1	-0.891	-1.09	-1.06	-0.505	-0.409	-2.4	-0.222	-0.614	-0.384	-1.24	-0.498
-1.53	-0.146	0.898	-0.904	-0.713										-2.21	-1.36	-0.535	-1.01	-1.12	-0.463	-0.592	-0.285	-0.313	-0.59	-1.18	-0.415
-1.41	-0.454	0.545	-0.369	-0.823										-1.97	-1.51	-0.0502	-1.03	-0.133	-1.29	-1.56	-0.219	-0.512	-0.393	-1.21	-0.00283
-0.769	1.24	0.52	-1.02	0.129										-1.98	-1.35	1.22	-1.14	-0.24	-1.9	-2.06	-0.263	-0.432	-0.789	-0.966	0.156
-1.55	-1.09	0.562	-0.594	1.01										-2.04	-1.62	0.21	-0.695	0.522	-0.578	-3.05	-0.285	-0.349	-0.473	-1.1	-0.348
-1.31	0.884	0.36	-0.953	-0.0577										-1.79	-1.98	-0.912	-0.526	0.109	-0.671	-1.21	-0.154	-0.723	-0.501	-1.3	-1.12
-1.17	0.0416	0.454	-0.852	-1.65										-1.8	-2.19	0.336	-0.586	0.525	-0.215	-1.5	-0.0338	-0.608	-0.634	-0.931	-0.266
-1	1.32	0.676	-0.404	0.955										-2.14	-2.35	0.0964	-0.722	0.744	-1.65	-0.171	1	-0.742	-0.62	-1.12	-1.12
-2.56	0.322	0.333	-0.564	-0.894										-2.43	-1.63	-0.375	-0.458	0.652	-0.421	-1.27	0.876	-0.312	-0.919	-1.49	-2.37
-1.43	-0.402	0.583	-0.354	0.253										-1.97	-2	0.157	-0.275	0.0482	-1.42	-0.734	0.817	-0.451	-0.876	-1.15	-1.03
-1.15	1.21	0.731	0.00333	-0.69										-1.84	-2.15	-0.403	-0.633	-0.0878	-1.21	-1.37	0.3	-0.58	-0.162	-0.786	-1.25
-1.81	1.52	0.46	0.382	-0.631										-1.88	-1.69	-0.794	-0.654	-0.483	-1.17	-1.64	0.153	-0.503	-0.122	-0.662	-1.73
-1.99	-0.00579	-0.119	-0.0882	-0.0586										-1.37	-1.83	-0.829	-0.598	-0.49	-1.28	-1.02	0.168	-0.29	-0.294	-0.789	-1.92
-1.48	-0.513	0.192	-0.397	0.503										-2.3	-1.64	0.313	-0.431	-0.0211	-0.926	-0.335	0.0141	0.728	-0.367	-0.636	-1.6
-1.04	0.37	0.742	0.123	-0.751										-1.73	-1.84	0.416	-0.647	-0.578	-0.583	-2.13	-0.161	1.66	-0.705	-0.56	-1.31
-0.482	-0.372	0.3	-0.313	-0.679										-2.04	-1.95	-0.278	-0.757	-1.08	-0.897	-1.37	-0.0563	1.81	-0.6	-0.663	-1.07
-1.61	-0.779	0.607	0.204	-0.641										-1.86	-2.04	-0.254	-0.497	-0.429	-0.776	-0.564	-0.0483	1.93	-0.96	-0.441	-1.6
-1.98	0.718	0.976	-0.551	-0.343										-1.91	-1.92	-0.621	-0.257	-1.05	-1.52	-1.91	0.0846	1.91	-0.444	-0.777	-1.67
-1.24	0.226	0.588	-0.65	-1.6										-0.889	-1.87	-0.682	-0.24	-0.878	-1.24	-1.27	-0.332	1.6	-0.518	-0.679	-1.94
-1.05	-0.172	0.161	-1.25	-0.199										-1.06	-1.85	-0.654	-0.754	-1.47	-0.686	-1.88	-0.459	1.36	-0.287	-0.61	-2.2
-1.03	-0.937	-0.0313	-0.939	-0.173										-1.3	-2.22	-0.388	-0.494	-1.44	-0.829	-1.62	-0.23	1.22	-0.584	-1.21	-1.9
-1.03	0.809	0.239	-1.03	-0.209										-1.51	-2.27	0.304	-0.563	-0.2	-1.47	-2.76	-0.469	0.982	-0.78	-1.08	-1.74
-2.9	-0.454	0.429	-1.02	0.934										-0.83	-2.2	0.119	-0.384	-0.156	-0.928	-1.18	-0.088	1.08	-0.643	-0.934	-1.64
-2.75	-0.269	-0.11	-0.761	0.701										-1.44	-1.93	-0.409	-0.555	-0.691	-0.208	-1.65	-0.475	1.15	-0.665	-1.04	-2.37
-2.81	1.89	-0.0566	-0.431	-0.216										-1.88	-2.27	-0.765	-0.586	-0.999	-0.904	-1.44	-0.166	1.12	-0.416	-1.4	-2.41
-1.67	1.78	0.337	-0.139	-1.52										-1.49	-2.35	-1.04	-0.187	-0.372	-1.09	-0.593	-0.458	1.57	-0.694	-1.25	-1.91
-1.47	0.0432	0.306	-0.351	0.091										-1.61	-2.63	-1.36	-0.805	-1.16	-0.859	-1.61	-0.483	2.43	-1.01	-1.22	-1.93
-1.56	0.00564	0.178	-0.293	-0.591										-0.661	-2.47	-0.925	-0.768	-1.69	-0.273	-0.996	-0.402	2.14	-1.01	-1.26	-2.57
-2.35	0.0682	-0.155	0.0456	0.0568										-1.28	-2.29	-0.965	0.11	-1.65	-0.84	-1.13	-0.608	2.09	-0.945	-1.77	-1.92
-2.13	0.894	-0.267	0.174	0.827										-1.07	-2.1	-0.515	-0.15	-1.46	-1.16	-1.29	-0.573	2.07	-1.16	-1.22	-1.92
-1.62	-0.461	-0.461	0.262	-1.93										-1.6	-2.52	-0.0594	-0.728	-2.05	-1.22	-0.982	-0.681	1.93	-0.87	-1.44	-1.94
-2.14	0.0576	-0.611	1.19	-1.26										-1.76	-2.49	0.107	-0.198	-1.15	-1.6	-1.55	-0.67	2.37	-0.955	-1.25	-1.66
-2.45	0.612	-0.0989	0.692	-1.75										-1.72	-2.38	-0.931	-0.378	-1.4	-1.27	-1.84	-0.93	2.27	-0.599	-1.39	-1.89
-1.04	0.126	-0.398	0.325	-0.854										-1.75	-2.48	-0.591	-0.505	-1.7	-0.728	-1.81	-0.822	2.27	-1.07	-1.56	-1.73
-1.21	0.658	-0.412	0.577	-1.84										-1.48	-2.55	-1.21	-1.03	-1.23	-1.18	-0.955	-0.984	2.11	-1.05	-2.17	-2.1
-1.61	0.447	-0.446	0.712	-2.2										-1.25	-2.47	-0.122	-1.12	-1.24	-0.957	-0.613	-0.948	2.01	-1.23	-1.6	-1.81
-2.39	0.0787	-0.453	0.181	0.268										-1.55	-2.86	-0.156	-1.33	-1.59	-0.375	-1.35	-0.91	1.9	-1.13	-1.53	-1.04
-2.78	0.34	-0.342	0.369	-0.386										-1.83	-2.5	-0.503	-1.07	-1.56	-0.59	-1.86	-1.18	1.77	-1.31	-1.59	-0.948
-2	-0.263	-0.852	1.28	0.186										-1.82	-2.43	-0.524	-1.8	-1.78	0.307	-1.59	-1.01	1.74	-0.915	-1.62	-1.33
-0.328	-0.123	-0.696	0.771	-0.417										-1.63	-2.72	0.747	-1.76	-1.5	-0.12	-1.58	-0.985	1.31	-0.774	-1.47	-0.399
-1.15	-0.354	-0.952	1.48	-0.156										-1.19	-2.54	0.136	-1.64	-1.81	-0.296	-0.628	-0.894	1.45	-1.28	-1.76	-1.09
-0.844	-0.156	-0.206	2.22	-0.445										-0.843	-2.6	1.09	-1.87	-1.68	-0.064	-1.07	-0.926	1.37	-1.46	-1.76	-0.965
-0.767	0.483	-0.373	3.15	0.905										-1.73	-2.42	-0.32	-0.963	-2.24	-0.0151	-0.812	-1.14	1.16	-1.38	-2.11	-0.673
-2.02	0.711	0.159	3.77	0.768										-2.12	-2.16	-0.468	-1.13	-1.4	0.465	-0.334	-1.08	1.23	-1.41	-1.65	-1.23
-1.21	-1.48	0.576	4.25	-0.858										-1.99	-2.25	-1.16	-1.25	-0.925	0.51	-0.753	-1.24	0.8	-1.03	-1.38	-0.456
-0.913	0.419	1.76	2.92	-0.908										-1.8	-2.09	-0.379	-1.01	-1.53	0.365	-1.45	-1.27	1.1	-1.13	-1.3	-0.682
-1.95	-1.66	1.2	2.08	-0.165										-1.62	-2.27	1.21	-1.33	-1.48	0.347	-1.67	-1.12	1.48	-1	-1.48	-0.925
-1.78	0.454	0.39	2.44	-0.933										-1.97	-1.87	0.792	-1.45	-2.42	-0.34	-1.12	-1.32	1.64	-0.892	-1.44	-1.27
-2.34	-0.271	0.478	1.91	-0.624										-2.24	-2.48	0.114	-1.38	-1.97	-0.14	-0.679	-1.26	1.05	-1.35	-1.36	-1.08
-1.97	-0.0707	0.129	2.57	-0.167										-2.28	-1.84	0.329	-1.16	-2.6	0.323	-0.838	-1.24	0.884	-1.19	-1.15	-1.16
-1.72	-1	0.00909	2.39	-0.314										-1.98	-2.11	-0.706	-1.36	-2.38	0.0344	-1.31	-1.13	1.22	-1.11	-1.36	-1.51
-1.77	-0.183	0.211	2.94	0.371										-2.31	-2.66	-0.761	-1.43	-1.98	0.586	-1.03	-1.19	1.39	-1.39	-1.86	-1.33
-2.41	-2.58	-0.263	2.55	-0.56										-2.6	-2.26	-0.385	-1.15	-1.63	0.304	-0.689	-1.08	1.34	-1.35	-1.93	-1.77
-1.63	-1.66	0.115	2.53	-0.719										-2.34	-2.67	-0.705	-0.673	-2.14	0.839	-0.638	-1.21	0.792	-1.17	-1.49	-1
-1.91	-1.37	0.0439	3.04	-0.687										-2.4	-2.92	-0.827	-0.673	-0.521	0.456	-1.12	-1.44	0.666	-1.03	-1.56	-1.99
-1.97	-0.427	-0.136	2.81	0.547										-2.14	-2.27	-0.815	-0.399	-0.22	1.38	-1.18	-1.33	0.206	-1	-1.78	-2.22
-2.66	-1.73	-0.213	2.57	-1.31										-2.38	-2.28	-1.59	-0.535	-1.08	2.03	-0.927	-1.04	0.288	-0.921	-1.96	-1.52
-2.21	-1.52	-0.283	2.05	-1.38										-2.02	-2.29	-0.942	-0.839	-0.922	2.04	-1.35	-0.895	0.323	-0.627	-1.84	-1.18
-2.12	-0.336	-0.235	2.6	-0.53										-2.29	-2.45	-0.254	-0.867	-0.941	2.11	-2.05	-1.12	0.332	-0.848	-1.89	-1.01
-1.22	-1.17	-0.644	2.33	-0.503										-2.04	-2.26	-1.15	-1.11	-1.34	2.18	-0.291	-1.07	0.387	-0.691	-1.52	-1.72
-1.98	-1.1	-0.44	2.3	0.391										-2.05	-1.83	-0.833	-1.33	-0.836	1.89	-1.67	-1.44	0.696	-0.901	-1.35	-1.31
-1.28	0.496	-0.06	2.58	-0.421										-2.23	-1.97	-0.892	-1.07	-0.234	1.84	-1.1	-1.18	0.174	-0.88	-1.13	-1.36
-2.78	-0.284	0.362	3.34	-0.689										-2.32	-1.95	0.18	-1.02	-0.157	1.78	-1.65	-1.39	0.485	-0.873	-1.38	-1.03
-2.04	-1.49	0.305	3.74	0.0787										-2.67	-2.65	-0.198	-1.4	-0.0319	1.33	-1.25	-1.2	0.238	-0.82	-1.29	-1.14
-1.08	-0.494	0.00221	3.52	0.626										-2.33	-2.25	-1.18	-1.4	-0.336	1.26	-0.21	-1.22	0.433	-1.11	-1.14	-0.971
-0.825	-0.187	0.236	3.64	-1.07										-1.83	-1.64	-1.04	-1.12	-0.0224	0.822	-0.604	-1.1	0.384	-0.695	-1.49	-0.752
-1.16	-1.98	0.0483	4.01	-1.52										-2.13	-1.74	-0.168	-1.33	-0.83	0.0667	-1.84	-1.28	0.274	-0.897	-1.33	-0.495
-1	-0.0437	0.512	3.91	0.504										-1.56	-2.16	-0.41	-1.43	-0.625	0.383	-1.39	-1.09	-0.045	-0.956	-1.83	-0.2
0.174	0.707	0.255	3.37	0.413										-1.76	-1.92	-1.62	-1.43	-0.277	0.388	-1.13	-1.16	0.0981	-0.433	-1.56	-0.763
-1.01	-0.533	0.658	3.59	-0.603										-1.5	-2.17	-0.666	-1.58	0.00399	0.086	-0.505	-1.4	0.228	-0.392	-1.5	-0.982
-0.204	-0.266	0.527	3.45	-0.985										-1.97	-1.96	-1.19	-1.7	-1.07	0.00696	-2.25	-1.45	0.276	-0.404	-1.33	-0.67
-1.64	-0.618	0.564	3.48	-0.218										-2.13	-2.03	-1.68	-1.56	-1.03	0.305	-1.95	-1.51	0.54	-0.396	-1.5	-0.472
-0.431	-1.14	0.298	3.02	-0.618										-2.33	-2.19	-2.14	-1.55	-1.05	1.02	-1.03	-1.19	0.00664	-0.75	-1.41	0.253
-0.682	-0.128	0.518	3.33	0.125										-2.55	-2.32	-1.49	-0.703	-1.89	0.0605	-0.535	-1.32	0.246	-0.423	-1.46	-0.85
-1.28	-0.297	0.352	3.17	-0.485										-2.81	-2.61	-1.93	-0.969	-1.53	1.11	-1.75	-1.2	-0.273	-0.636	-1.69	0.013
-0.544	0.136	-0.237	4.28	-0.0544										-2.66	-1.68	-0.824	-0.748	-2.03	1.13	-0.914	-1.28	-0.174	-0.691	-1.46	-0.839
-1.71	-1.14	0.453	3.53	0.459										-2.13	-2	-1.63	-0.837	-1.05	0.541	-1.12	-1.22	-0.0759	-1.1	-1.45	-0.654
-1.45	-0.528	0.29	2.32	0.227										-2.55	-2.58	-1.79	-0.327	-1.37	1.08	-0.154	-1.41	0.0817	-1.01	-1.47	0.372
-1.68	0.0503	0.371	2.46	0.562										-2.01	-2.35	-1.76	-0.543	-1.64	1.1	-1.23	-1.6	0.184	-1.05	-1.78	-0.41
-0.598	-0.125	0.333	2.09	0.36										-2.21	-2.44	-2.18	-0.841	-1.35	0.411	-2.04	-1.7	0.0955	-0.99	-1.82	0.00308
-1.94	0.0898	0.817	1.62	0.349										-2.9	-2.46	-1.31	-1.09	-1.63	0.448	-1.19	-1.69	-0.183	-0.985	-1.61	-0.45
-2	0.347	0.323	0.952	-0.0938										-2.41	-2.26	-2.18	-1.61	-1.68	0.148	-1.34	-1.4	-0.0644	-0.877	-1.86	-0.0245
-0.802	-0.716	0.444	1.25	0.743										-3.1	-2.39	-1.51	-1.75	-1.88	-0.368	-1.15	-1.23	0.00533	-0.928	-1.83	-0.521
-1.44	0.486	0.524	1.18	0.582										-1.9	-2.27	-1.44	-1.51	-2.07	-0.238	-1.23	-1.22	-0.114	-1.18	-1.97	0.0108
-1.94	-0.187	0.513	1.16	-0.676										-2.04	-2.19	-1.4	-1.15	-1.3	-0.396	-1.88	-1.49	-0.142	-1.18	-1.92	0.103
-2.15	-0.525	-0.0485	1.8	1.46										-2.56	-3.08	-1.27	-1.28	-1.81	-0.219	-1.86	-1.42	-0.201	-1.02	-1.87	-0.189
-1.56	-0.832	0.388	3.82	1										-1.87	-2.53	-1.24	-1.38	-1.02	-0.178	-2.28	-1.36	-0.0724	-1.08	-1.9	-0.272
-1.48	-0.117	0.378	3.14	-0.0916										-1.74	-2.51	-1.76	-1.39	-2.18	0.225	-1.63	-1.55	-0.134	-0.952	-1.75	0.294
-0.882	0.961	0.436	3.93	-0.0943										-1.86	-2.58	-1.41	-1.21	-1.18	-0.248	-1.84	-1.68	-0.101	-1.26	-2.12	-0.18
-1.02	-1.13	0.137	4.29	1.05										-1.82	-2.57	-0.963	-1.44	-1.33	-0.0413	-1.43	-1.27	-0.323	-0.929	-2.03	-0.113
-0.579	-0.207	0.317	4.92	0.516										-2.04	-2.57	-0.623	-0.94	-1.73	-0.0348	-1.93	-1.15	-0.188	-1.02	-2.3	-0.16
-0.39	-0.314	0.132	5.23	0.271										-2.74	-2.17	-1.26	-1.24	-1.48	-0.238	-1.99	-1.42	-0.139	-1.4	-2.01	-0.291
-0.301	-0.0676	0.125	5.01	0.704										-2.55	-2.03	-1.35	-0.793	-1.3	0.0322	-2.07	-1.27	-0.239	-1.35	-2.05	-0.219
-0.364	-1.5	0.216	4.82	-0.246										-2.53	-2.26	-1.54	-1.2	-1.48	-0.0156	-2.72	-1.4	-0.415	-1.5	-1.82	-0.965
-0.939	-0.543	-0.0542	5.78	0.933										-1.93	-2.69	-1.25	-1.24	-1.38	0.559	-2.65	-1.26	-0.124	-1.52	-1.96	-0.00994
-1.72	1.04	-0.17	5.27	0.649										-2.09	-2.31	-1.48	-1	-2.26	1.32	-1.72	-1.29	-0.39	-1.36	-2.15	-0.169
-1.55	-0.467	-0.177	5.52	0.167										-1.85	-2.1	-1.6	-0.77	-1.67	2.72	-1.84	-1.05	-0.0686	-1.61	-2.31	-0.303
-2.06	0.705	0.16	4.32	0.0529										-1.79	-2.5	-1.6	-0.434	-1.31	3.38	-1.68	-1.07	-0.304	-1.81	-2.25	-0.223
-1.41	-0.224	-0.546	4.69	-0.158										-2.06	-2.66	-1.07	-1.07	-1.57	2.95	-2.36	-1.11	-0.331	-1.41	-2.08	-0.129
-2	-1.29	0.442	4.04	0.187										-2.19	-2.38	-1.22	-1.01	-0.442	3.52	-1.29	-1.24	-0.753	-1.53	-2.29	-0.541
-2.97	-0.643	-0.138	3.28	-0.672										-2.04	-2.15	-1.84	-0.538	-1.07	3.4	-0.832	-1.03	-0.76	-1.46	-2.46	-1.39
-1.87	0.704	-0.168	3.57	0.844										-2.34	-2.51	-1.4	-0.544	-1.95	4.23	-0.528	-1.23	-0.478	-1.42	-2.56	-1.26
-2.46	0.718	-0.45	3.63	-1.15										-2.5	-2.26	-1.06	-1.32	-2.16	5.28	-1.67	-1.19	-0.649	-1.48	-2.3	-1.6
-2.34	1.34	-0.444	3.9	0.398										-2.58	-1.71	-0.897	-1.08	-2.8	5.26	-2.79	-1.19	-0.411	-1.67	-2.34	-1.34
-2.52	1.13	-0.432	3.14	0.33										-2.1	-2.65	-1.04	-1.05	-1.62	4.94	-2.59	-1.15	-0.53	-1.35	-2.43	-1.9
-2.42	0.781	-0.31	3.24	-0.311										-1.93	-2.82	-1.09	-1.13	-2.58	4.53	-1.32	-1.44	-0.714	-0.936	-2.49	-2.66
-0.437	-0.809	-0.309	3.38	-0.906										-2.12	-2.24	-0.888	-0.804	-2.43	4.03	-2.36	-1.55	-0.646	-1.26	-2.65	-2.04
-1.83	-0.285	-0.365	2.97	-0.79										-2.15	-2.71	-1.41	-1.13	-2.45	3.87	-2.44	-1.39	-0.305	-1.23	-2.44	-2.19
-1.6	-0.451	-0.478	2.48	-0.109										-2.15	-2.68	-2.11	-1.39	-2.39	3.59	-2.09	-1.28	-0.277	-1.23	-2.32	-1.79
-2.24	-1.55	-0.628	2.87	-1.39										-2.28	-3.07	-1.13	-0.975	-1.9	3.19	-2.44	-1.58	-0.278	-1.6	-2.43	-1.32
-2.71	-0.318	-0.768	2.29	-0.105										-2.39	-2.7	-1.04	-1.32	-1.72	3.25	-2.65	-1.54	-0.262	-1.41	-2.48	-1.24
-2.23	-0.826	-0.397	1.59	-0.452										-2.29	-2.96	-0.814	-1.38	-2.09	3.28	-3.47	-1.56	-0.311	-1.4	-2.45	-1.55
-2.25	0.436	-0.684	1.94	-0.384										-2.02	-2.75	-0.72	-1.28	-1.96	3.46	-3.28	-1.51	-0.169	-1.31	-2.42	-1.76
-1.83	-0.714	-0.372	1.94	0.586										-2.2	-2.9	-0.62	-0.818	-2.57	3.28	-2.7	-1.55	-0.413	-1.38	-2.2	-1.31
-2.02	-0.0985	-0.35	1.93	0.0259										-2.2	-2.61	-0.939	-1.19	-2.2	3.13	-1.98	-1.56	-0.442	-1.33	-2.03	-1.33
-1.18	0.655	-0.8	1.74	0.276										-2.21	-2.34	-0.624	-0.916	-1.95	4.12	-1.96	-1.33	-0.667	-1.22	-2.23	-0.593
-2.75	1.33	-0.743	1.35	0.69										-2.81	-2.42	-0.87	-1.02	-1.19	4.99	-2.26	-1.47	-0.486	-1.51	-2.45	-0.166
-2.32	-0.806	-0.449	2.21	1.49										-2.7	-2.64	-0.776	-1.01	-2.17	5.29	-1.39	-1.73	-0.158	-1.22	-2.18	0.273
-1.75	-1.56	-0.294	3.67	0.0817										-2.28	-2.77	-1.18	-1.26	-2.15	5.02	-1.81	-1.37	-0.515	-1.19	-1.99	0.0926
-2.53	0.293	-0.57	4.46	0.581										-2.29	-2.69	-1.62	-1	-2.37	4.95	-1.72	-1.49	-0.631	-1.36	-2.32	-0.0362
-1.85	0.957	-0.314	4.6	1.18										-2.68	-2.59	-1.4	-0.872	-1.88	4.15	-1.58	-1.64	-0.676	-1.37	-2.09	-0.629
-1.56	0.241	-0.597	4.73	-0.115										-2.81	-2.5	-0.7	-0.849	-2.02	4.43	-2.57	-1.36	-1.1	-1.32	-2.39	-0.412
-1.78	-0.25	-0.689	4.11	-0.406										-2.72	-2.63	-1.53	-1.15	-1.46	4.69	-2.27	-1.56	-0.733	-0.991	-2.23	-0.752
-2.46	0.18	-0.816	4.17	-0.25										-2.65	-2.45	-2.4	-0.78	-2.08	5.38	-2.42	-1.63	-0.659	-1.65	-2.45	0.0545
-2.16	-0.921	-0.5	3.89	-0.583										-2.09	-2.39	-1.96	-1.19	-1.96	4.55	-2.07	-1.5	-0.678	-1.73	-2.18	-0.613
-2.32	0.105	-1.18	3.81	-0.627										-1.88	-2.37	-2.36	-0.976	-1.89	4.8	-2.79	-1.41	-0.527	-1.38	-2.46	-0.739
-2.28	-0.801	-0.971	3.37	0.257										-2.85	-2.54	-1.78	-0.807	-2.04	3.63	-3.38	-1.53	-0.886	-1.58	-2.09	-0.746
-2.02	1.17	-0.845	3.38	-1.46										-2.77	-2.67	-2.1	-0.745	-2.98	3.51	-2.48	-1.52	-0.908	-1.62	-2.38	-1.7
-2.12	0.0376	-0.869	2.41	-0.471										-2.39	-2.69	-1.59	-0.769	-1.1	4.33	-1.95	-1.59	-0.527	-1.57	-2.29	-0.969
-2.1	0.258	-1.02	3.18	-0.567										-2.49	-3.05	-1.4	-1.22	-1.96	4.01	-2.18	-1.63	-0.903	-1.5	-2.39	-1.2
-2.88	-0.914	-1.05	3.13	-0.184										-2.84	-2.75	-1.74	-0.903	-1.57	3.99	-1.44	-1.47	-1.14	-1.74	-2.27	-1.57
-1.92	0.911	-1.18	2.26	-0.397										-2.57	-2.62	-1.36	-1.61	-1.81	3.44	-1.65	-1.42	-1.2	-1.95	-2.62	-0.38
-2.3	0.383	-1.17	2.35	0.0046										-2.64	-3.13	-1.68	-1.37	-1.64	4.21	-2	-1.26	-0.926	-1.87	-2.56	-1.37
-1.81	-0.653	-1.12	1.66	0.48										-2.63	-2.9	-1.14	-1.2	-2.7	3.15	-1.57	-0.741	-1.17	-1.7	-2.37	-2.02
-2.84	0.234	-1	1.47	-0.413										-2.98	-2.77	-1.29	-1.27	-2.5	3.3	-2.82	-0.719	-1.05	-1.68	-2.59	-2
-2.38	-0.278	-0.994	1.56	0.0775										-2.17	-3.28	-1.48	-0.915	-2.14	2.71	-1.97	-0.779	-0.977	-1.43	-2.36	-2.16
-2.32	-0.508	-1.26	1.25	-1.21										-2.08	-3.01	-1.68	-1.14	-2.22	2.24	-1.88	-1.08	-1.11	-1.6	-2.58	-1.34
-1.9	-0.0453	-1.23	1.13	-2.1										-2.64	-2.37	-1.41	-0.998	-2.11	1.93	-2.05	-0.98	-1.23	-1.66	-2.77	0.408
-3.09	-0.218	-1.65	0.449	-0.578										-2.52	-2.57	-1.37	-1.25	-2.25	1.65	-3.24	-1.09	-1.07	-1.81	-2.68	0.0488
-2.66	-0.764	-1.13	0.786	-0.328										-2.3	-2.39	-1.24	-1.16	-3.03	1.13	-1.82	-0.99	-0.841	-1.6	-2.76	0.107
-1.94	0.289	-1.11	0.451	-0.845										-2.33	-2.49	-1.74	-1.14	-2.08	1.26	-2.04	-1.08	-1.13	-1.62	-2.77	-0.332
-2.53	0.435	-1.15	-0.211	-0.118										-2.53	-2.74	-0.938	-1.14	-2.23	1.37	-2.93	-0.915	-1.13	-1.6	-2.64	-0.385
-2.72	-0.126	-0.506	-0.336	-1										-2.81	-2.31	-1.97	-1.32	-2.69	1.48	-3.01	-0.96	-1.05	-1.82	-2.58	-1.71
-2.2	-0.277	-0.987	0.362	-0.959										-2.79	-2.2	-1.25	-1.5	-1.69	1.97	-2.84	-1.06	-1.01	-1.85	-2.84	-1.8
-2.72	-0.386	-1.3	0.306	0.32										-2.94	-2.45	-1.72	-0.772	-1.7	1.11	-2.2	-1.29	-1.09	-1.82	-2.53	-1.15
-2.06	-0.273	-1.06	-0.205	0.297										-2.43	-2.75	-2.04	-1.55	-2.3	1.48	-3.35	-1.08	-1.4	-1.99	-2.79	-1.3
-2.75	0.295	-1.17	-0.365	-0.876										-2.73	-2.45	-1.13	-1.36	-2.92	1.36	-3.48	-1.21	-1.58	-2.1	-2.76	-0.838
-2.03	-0.375	-1.08	-0.203	-1.27										-2.74	-3.04	-1.29	-1.68	-2.33	1.21	-1.76	-1.22	-1.51	-1.91	-2.8	-1.14
-2.76	0.231	-0.71	-0.415	-1.11										-2.59	-3.04	-1.04	-1.25	-2.42	0.877	-2.16	-1.24	-1.76	-2.12	-2.68	-1.66
-2.26	-0.538	-1.28	-0.0704	-1.33										-2.49	-2.15	-1.99	-1.31	-2.45	1.14	-1.87	-1.45	-2.13	-2.02	-2.85	-1.53
-2.91	-1.45	-1.55	-0.416	-1.58										-2.28	-2.51	-1.49	-1.34	-2.37	1.11	-1.89	-1.52	-1.54	-2.26	-2.8	-1.75
-2.42	-0.464	-1.28	-0.289	-1.83										-2.56	-2.42	-2.17	-0.777	-2.07	0.689	-2.44	-1.58	-1.6	-2.37	-2.81	-1.42
-2.23	-0.384	-1.72	-0.568	-1.23										-2.45	-2.55	-1.4	-0.487	-2.26	0.438	-2.17	-1.23	-1.72	-2.26	-2.3	-1.01
-3.3	-0.458	-1.59	-0.246	-0.711										-2.81	-2.74	-1.88	-1.05	-2.4	0.673	-2.36	-1.37	-1.77	-2.12	-2.55	-0.951
-3.21	1.01	-1.5	-0.0556	-0.43										-2.96	-2.67	-2.35	-0.897	-2	-0.00397	-1.45	-1.28	-1.63	-2.21	-2.74	-1.31
-2.43	-0.571	-1.38	-0.492	-0.853										-2.87	-2.69	-1.44	-1.09	-1.97	0.438	-2.03	-1.62	-1.72	-1.87	-2.8	-2.19
-1.61	0.465	-1.16	-0.879	-0.625										-2.8	-2.78	-1.69	-0.731	-2.03	0.581	-1.94	-1.45	-1.9	-2.08	-3.04	-1.78
-4.35	-0.092	-1.15	-0.642	-1.64										-2.81	-3.11	-1.84	-1.39	-1.39	0.4	-1.97	-1.33	-1.88	-2.01	-2.8	-1.76
-3.16	0.374	-1.34	-0.498	-1.68										-2.99	-2.44	-1.83	-0.905	-1.96	-0.0741	-1.91	-1.42	-1.65	-2.13	-2.96	-1.32
-2.53	0.443	-1.06	-0.635	-2.08										-2.52	-2.46	-1.61	-1.38	-2.52	0.316	-1.08	-1.1	-1.58	-2.02	-2.68	-1.68
-2.6	-0.37	-1.32	-0.213	-0.435										-2.55	-2.6	-1.25	-1.26	-2.46	0.154	-1.2	-1.19	-1.66	-2.33	-2.92	-1.8
-2.54	-0.643	-1.61	-0.754	-1.04										-2.75	-2.61	-1.08	-1.3	-2.15	0.789	-1.53	-0.886	-1.53	-2.19	-2.95	-1.94
-2.47	-1	-1.29	-0.899	-1.59										-2.67	-2.65	-0.933	-1.08	-2.53	1.17	-2.95	-0.87	-1.86	-2.21	-2.9	-1.99
-2.99	-0.93	-1.69	0.265	-1.24										-2.9	-3.28	-1.59	-1.16	-1.59	0.891	-1.54	-0.886	-2.17	-2.01	-2.97	-2.38
-2.41	0.838	-1.16	-1.04	-1.22										-2.05	-2.99	-1.63	-1.72	-1.19	0.853	-2.1	-0.911	-1.95	-1.92	-3.08	-2.76
-2.76	-0.288	-1.33	-0.522	-2.48										-2.39	-2.77	-1.84	-1.13	-1.89	1.52	-1.86	-1.2	-2	-2.06	-3.07	-1.64
-2.42	0.927	-1.44	-0.961	-0.509										-2.35	-2.58	-1.52	-1.33	-1.57	0.874	-2.2	-1.05	-1.7	-2.1	-2.97	-1.06
-2.38	-0.743	-1.73	-0.578	-1.02										-2.87	-2.14	-1.29	-1.21	-1.94	1.65	-2.27	-1.1	-1.72	-2.19	-2.9	-1.51
-2.18	1.16	-1.3	-0.894	-1.18										-2.92	-2.93	-0.914	-1.31	-1.43	1.63	-3.22	-1.15	-2.02	-2.19	-2.51	-1.55
-2.3	-0.453	-1.78	-1.25	-0.861										-2.95	-2.6	-0.7	-1.06	-1.57	0.807	-2.8	-1.14	-2.42	-2.08	-2.85	-1.16
-2.3	-0.933	-1.22	-0.52	-1.06										-3.05	-2.72	-1.41	-1.63	-1.42	1.76	-1.31	-1.16	-2.06	-1.66	-2.88	-1.75
-3.07	-1.13	-1.31	-0.786	-1.11										-2.4	-2.43	-1.24	-1.22	-1.1	2.61	-2.15	-1.11	-2.35	-1.49	-2.76	-1.14
-1.91	0.87	-1.3	-1.12	-2.19										-3.23	-2.39	-1.36	-0.785	-1.48	2.57	-1.23	-1.27	-2	-1.33	-2.73	-1.79
-2.48	0.0531	-1.92	-1.54	-0.959										-3.51	-2.73	-0.699	-0.859	-2.67	2.62	-1.32	-1.3	-2.22	-1.43	-2.89	-1.55
-2.1	-0.00451	-1.42	-1.27	-0.821										-3.01	-2.42	-1.24	-1.08	-2.1	1.9	-1.29	-1.36	-1.99	-1.64	-3.01	-1.84
-2.23	-0.0551	-1.54	-0.915	-0.403										-3.38	-2.72	-1.2	-1.1	-1.67	2.15	-2.09	-1.21	-2.09	-1.49	-2.89	-1.85
-2.97	-0.3	-1.47	-0.358	-0.852										-3.3	-2.59	-0.832	-1.15	-2.2	2.08	-2.21	-1.4	-2.13	-1.97	-2.92	-2.34
-2.63	0.881	-1.5	0.411	-1.59										-2.67	-2.67	-1.68	-0.71	-1.45	2.41	-2.18	-1.37	-2.4	-1.86	-2.62	-2.12
-2.4	-0.96	-1.97	0.694	-1.01										-3.26	-2.6	-0.834	-0.979	-2.15	2.37	-2.65	-1.55	-2.77	-1.68	-2.88	-2.1
-2.19	0.374	-1.59	0.753	-1.64										-3.1	-2.47	-1.78	-1.06	-2.71	2.41	-2.72	-1.5	-2.27	-1.48	-3.03	-2.22
-3.38	-0.584	-1.22	0.966	-1.83										-2.99	-2.89	-1.34	-1.11	-2.07	2.05	-1.95	-1.45	-2.23	-1.85	-2.84	-1.93
-2.2	-0.0737	-1.32	0.786	-1.31										-2.99	-2.65	-0.981	-1.38	-2.43	2.47	-2.59	-1.46	-2.06	-1.78	-2.78	-2
-0.865	-0.419	-1.89	0.66	-0.213										-3.01	-3.19	-1.76	-1.33	-1.84	2.13	-1.85	-1.57	-1.72	-2.1	-2.92	-1.84
-1.45	0.147	-2.27	0.321	0.202										-3.18	-2.83	-1.95	-1.2	-2.71	1.84	-2.77	-1.75	-1.6	-1.9	-3.03	-1.71
-0.928	0.318	-2.06	0.05	-0.485										-2.86	-3.13	-2.08	-1.46	-2.28	1.34	-1.51	-1.5	-1.95	-2.26	-2.76	-1.71
-1.76	0.475	-2	0.581	-1.3										-3.23	-2.66	-1.74	-1.22	-2.24	1.7	-3.02	-1.51	-0.713	-2.21	-2.74	-2.83
-1.8	-0.105	-2.08	0.102	-2										-2.81	-2.69	-1.97	-1.25	-1.8	1.57	-2.36	-1.75	-0.444	-2.17	-2.63	-2.44
-1.61	0.369	-2.01	0.194	-1.54										-3.05	-2.91	-2.02	-1.4	-2.02	1.14	-2.16	-1.79	-0.325	-1.97	-2.71	-1.28
-2.81	0.24	-2.36	-0.506	-2.42										-2.67	-2.97	-2.53	-1.68	-2.06	1.97	-1.42	-1.72	-0.188	-2.13	-3.02	-1.03
-1.3	0.341	-2.04	-0.843	-1.77										-2.47	-3.1	-2.19	-1.59	-1.9	1.89	-2.27	-1.51	-0.223	-2.2	-3.24	-1.97
-3.01	-1.34	-1.55	-0.81	-0.781										-2.56	-2.9	-1.93	-1.19	-2.16	1.3	-2.3	-1.48	-0.346	-1.98	-2.97	-2.05
-2.46	-0.167	-1.59	-0.628	-1.1										-2.84	-2.65	-1.47	-0.796	-2.13	1.55	-2.73	-1.93	-0.685	-2.35	-3.33	-1.89
-3.18	0.137	-1.48	-0.573	-1.35										-2.84	-2.57	-2.45	-1.06	-2.3	1.57	-1.9	-1.58	-0.565	-2.16	-3.33	-1.38
-2.26	-1.14	-1.63	-0.664	-0.778										-3.37	-3.09	-1.99	-0.941	-2.1	1.94	-2.22	-1.75	-1.16	-2.14	-3.14	-2.1
-2.91	-1.22	-1.6	-1.04	-0.425										-2.53	-2.92	-1.52	-0.646	-2.03	2.27	-2.17	-1.61	-1.15	-2.01	-3.37	-2.52
-3.03	0.307	-1.59	-1.15	-1.02										-2.61	-3.39	-1.17	-1	-1.56	1.65	-2.71	-1.79	-1.25	-1.96	-3.18	-1.09
-2.5	0.271	-1.57	-1.49	0.221										-2.53	-3.15	-1.05	-1.15	-1.63	1.12	-1.59	-1.99	-0.867	-2.16	-3.36	-1.3
-2.72	-0.677	-1.91	-0.749	-1.28										-2.63	-2.94	-1.42	-1.19	-1.22	0.137	-1.49	-1.81	-1.46	-2.29	-3.29	-0.956
-1.61	0.247	-1.74	-0.594	-0.725										-2.7	-2.93	-1.97	-1.44	-2.39	0.0433	-2.67	-2	-1.26	-2.18	-3.29	-2.13
-2.47	-0.477	-1.59	-0.699	-2.39										-3.12	-2.72	-2.05	-1.33	-1.57	0.547	-2.48	-1.67	-1.12	-2.09	-3.42	-1.6
-2.72	-0.287	-1.83	-0.965	-2.41										-2.96	-2.82	-1.66	-1.65	-1.34	1.56	-2.6	-1.76	-1.54	-2.22	-3.32	-1.37
-2.81	0.156	-1.84	-1.12	-0.954										-3	-2.77	-1.54	-1.14	-1.86	0.756	-1.77	-1.71	-1.32	-2.22	-3.35	-1.63
-2.61	-0.127	-1.92	-1.09	-1.26										-3.12	-2.94	-2.58	-1.11	-1.76	0.204	-2.08	-1.59	-1.32	-2.39	-3.14	-2.2
-2.23	-0.0998	-1.66	-1.13	-1.82										-2.87	-2.42	-1.9	-1.28	-1.92	0.104	-2.66	-1.49	-1.31	-2.3	-3.06	-2.35
-2.12	-0.00663	-1.8	-1.3	-1.03										-2.9	-2.42	-1.55	-1.33	-2.31	-0.233	-2.6	-1.64	-0.974	-2.32	-3.04	-1.77
-3.08	0.141	-1.73	-2.12	-1.2										-2.58	-2.12	-1.87	-1.24	-2.02	0.168	-3.01	-1.54	-1.44	-2.17	-3.02	-1.39
-3.05	1.01	-1.46	-1.24	-1.28										-2.59	-2.35	-1.41	-1.52	-2.45	0.372	-2.72	-1.37	-1.13	-2.15	-2.78	-1.48
-2.99	-0.0762	-1.28	-1.02	-1.48										-2.88	-2.96	-2.49	-1.29	-2.15	0.517	-2.83	-1.56	-1.08	-2.07	-2.77	-1.82
-2.38	0.679	-1.55	-1.84	-0.598										-2.67	-2.07	-1.75	-1.67	-2.02	1.09	-2.14	-1.59	-1.3	-2.51	-2.75	-2.62
-3.15	-0.935	-1.28	-1.74	-0.891										-3.28	-1.93	-0.959	-1.44	-2.14	1.73	-1.97	-1.62	-1.44	-2.39	-2.85	-2.15
-2.54	-1.05	-2.03	-1.33	-0.964										-2.99	-1.74	-2.3	-1.52	-2.41	0.811	-2.03	-1.62	-1.53	-2.47	-3.04	-1.65
-3.41	-1.51	-1.75	-1.63	-1.81										-2.63	-2.83	-1.85	-1.32	-2.62	0.682	-2.08	-1.53	-1.52	-2.56	-2.91	-1.38
-2.32	-0.394	-1.92	-1.05	-1.98										-1.99	-2.52	-1.19	-1.14	-1.65	0.304	-2.24	-1.59	-1.16	-2.38	-2.93	-1.25
-2.61	-0.574	-1.89	-1.38	-1.04										-1.42	-2.77	-2.11	-1.56	-2.28	0.0689	-1.71	-1.65	-1.2	-2.43	-2.89	-1.49
-2.27	-0.739	-1.84	-1.19	-0.735										-1.25	-2.53	-2.1	-1.23	-2.59	-0.457	-1.9	-1.56	-1.65	-2.54	-2.96	-1.46
-2.13	-0.485	-1.9	-0.774	-1.62										-1.59	-2.15	-2.41	-1.34	-2.71	-0.132	-1.81	-1.72	-1.59	-2.2	-2.64	-2.08
-2.44	0.405	-1.8	-1.44	-1.68										-1.84	-2.16	-1.85	-0.909	-1.75	0.421	-1.65	-1.64	-1.71	-2.63	-2.84	-1.59
-3.37	-0.802	-1.93	-1.38	-2.12										-2.25	-2.56	-0.336	-1.29	-2.55	0.572	-2.23	-1.6	-1.88	-2.44	-2.59	-1.67
-3.3	-0.983	-1.91	-0.681	-1.61										-2.09	-2.88	-0.517	-1.37	-2.26	-0.0213	-2.86	-1.72	-2.11	-2.44	-2.85	-1.83
-3.11	0.727	-1.79	0.249	-1.42										-1.94	-2.54	-1.55	-1.35	-1.54	0.375	-2.86	-1.53	-1.62	-2.53	-2.97	-1.62
-2.1	-0.276	-1.44	0.579	-1.23										-2.24	-2.07	-0.492	-1.26	-1.93	0.67	-2.54	-1.71	-1.59	-2.31	-3.09	-0.789
-3.05	-0.0199	-1.25	0.00922	-1.21										-2.59	-2.58	-0.574	-1.15	-1.98	0.531	-1.9	-1.54	-1.67	-2.37	-2.87	-0.365
-3.31	-0.968	-1.32	-0.0571	-1.17										-2.13	-2.15	-1.04	-1.27	-1.68	0.112	-1.03	-1.63	-1.92	-2.59	-2.74	-1.16
-3.11	-0.384	-1.63	0.00115	-1.13										-2.52	-2.12	-0.599	-1.32	-1.06	1.16	-1.28	-1.5	-1.65	-2.54	-3.04	-1.51
-2.56	-0.16	-1.54	-0.546	-1.72										-2.38	-1.85	-0.993	-1.58	-2.18	0.499	-1.09	-1.64	-1.74	-2.68	-2.93	-1.4
-2.54	-0.172	-1.68	-0.0068	-1.96										-2.28	-2.05	-0.661	-1.57	-1.42	0.531	-0.482	-1.49	-1.49	-2.71	-2.75	-0.893
-3.72	-0.764	-1.35	-0.864	-1.54										-2.08	-2.07	-0.668	-1.3	-1.06	0.117	-0.696	-1.36	-1.13	-2.56	-2.73	-0.782
-2.71	-0.255	-1.6	-0.539	-1.95										-2.68	-2.01	-1.19	-1.64	-1.55	0.459	-0.206	-1.61	-1.14	-2.54	-2.92	-2.58
-3.54	-0.728	-1.82	-1.08	-2.11										-2.23	-2.11	-1.32	-1.29	-2.42	-0.457	-1.46	-1.33	-1.12	-2.63	-3.64	-1.05
-3.4	-0.48	-1.76	-0.924	-2.47										-2.59	-2.56	-0.941	-1.29	-2.04	-0.156	-1.37	-1.64	-1.17	-2.57	-3.43	-1.53
-3.16	-0.299	-1.86	-1.28	-2.22										-2.51	-2.53	-1.08	-1.15	-2.59	-0.326	-1.9	-1.43	-1.68	-2.6	-3.09	-1.57
-3.29	-0.277	-2.25	-1.4	-0.938										-2.64	-2.33	-0.863	-1.16	-2.24	-0.0303	-2.59	-1.56	-1.68	-2.98	-3.08	-1.56
-3.15	0.0265	-2.17	-1.57	-2.1										-2.67	-2.65	-0.658	-1.34	-2.04	-0.338	-2.48	-1.67	-1.68	-3.03	-3.07	-0.772
-3.43	-1.07	-1.75	-1.11	-2.1										-2.56	-2.92	-1.57	-1.22	-2.32	0.0331	-0.844	-1.81	-1.91	-2.49	-3.36	-0.989
-2.92	-1.63	-1.49	-0.786	-1.66										-2.46	-2.42	-0.958	-1.09	-2.21	0.0518	-1.23	-1.71	-1.99	-2.22	-3.07	-1.62
-3.44	0.157	-2.12	-0.66	-1.03										-2.52	-2.15	-1.41	-0.676	-1.73	0.298	-2.55	-1.85	-1.28	-2.16	-3.04	-1.93
-3.59	-0.194	-2.34	-0.917	-1.74										-2.75	-2.7	-1.83	-0.738	-1.5	0.248	-2.35	-1.76	-2.02	-2.51	-3.48	-1.69
-2.61	-0.669	-1.86	-1.28	-2.72										-3.02	-2.41	-1.74	-0.433	-1.68	-0.205	-1.36	-1.86	-1.74	-2.63	-3.06	-1.37
-3	-2.31	-2.15	-1.1	-1.61										-2.92	-2.34	-1.39	-0.963	-2.25	0.248	-1.76	-1.71	-1.98	-2.53	-3.21	-2.54
-2.59	-0.221	-2.09	-1.57	-1.37										-2.37	-2.67	-0.594	-0.657	-1.94	-0.575	-1.89	-1.95	-2.1	-2.51	-3.07	-2.55
-2.84	0.447	-2.05	-1.21	-1.93										-2.38	-3.03	-1.34	-0.209	-1.5	-0.979	-2.18	-1.86	-2.55	-2.57	-3.09	-2.28
-2.38	-0.0493	-2.05	-1.66	-2.16										-2.45	-2.07	-0.878	0.378	-1.77	-1	-1.6	-2.06	-2.54	-2.61	-3.25	-1.72
-3.08	-1.41	-1.97	-1.89	-2.93										-2.71	-2.48	-0.665	0.084	-2.47	-0.969	-0.431	-1.97	-2.34	-2.23	-2.76	-1.38
-3.31	-1.32	-1.91	-1.72	-1.59										-2.72	-2.35	-0.685	-0.214	-1.82	-0.266	-2.33	-1.88	-2.06	-2.58	-2.91	-2.06
-3.02	-2.22	-2.02	-1.84	-1.25										-3.06	-2.5	-0.905	-0.597	-1.46	-0.565	-1.5	-1.99	-2.13	-2.24	-2.98	-1.81
-3.65	-0.448	-1.95	-1.44	-1.26										-2.97	-2.59	-0.0572	-0.659	-1.93	-0.113	-2.04	-1.92	-2.01	-2.4	-3.4	-1.67
-3.01	0.317	-1.83	-1.95	-2.24										-3.23	-2.88	-0.456	-0.715	-1.92	0.203	-2.26	-1.76	-2.22	-2.58	-3.1	-2.26
-3.63	-1.86	-1.6	-1.59	-2.4										-2.94	-2.95	-0.513	-0.604	-1.31	0.929	-1.13	-2.08	-2.47	-2.29	-3.55	-2.12
-3.35	-0.926	-2.04	-1.27	-1.99										-3.19	-2.45	-0.715	-0.862	-1.08	1.06	-1.38	-2.07	-2.45	-2.43	-3.06	-1.93
-2	-1.1	-1.64	-1.61	-3.2										-2.33	-2.81	-0.461	-0.408	-1.26	1.23	-1.55	-2.08	-2.13	-2.56	-3.37	-2.25
-2.24	-2.53	-2.13	-2.11	-2.33										-2.88	-2.78	-1.25	0.00712	-1.26	1.26	-1.12	-2.07	-1.94	-2.42	-3.07	-2.74
-1.58	-0.959	-2.19	-2.18	-0.604										-2.65	-2.81	-0.538	-0.689	-0.865	0.804	-2.13	-1.89	-2.26	-2.37	-3	-1.85
-0.858	-0.629	-2.13	-1.72	-1.95										-3.18	-2.62	-1.42	-0.493	-0.504	0.594	-1.49	-1.95	-2.13	-2.67	-3.04	-2.19
-0.454	-0.542	-1.77	-1.85	-0.925										-2.93	-2.89	-1.2	-0.286	-1.39	0.783	-2.63	-2.25	-2.29	-2.9	-3.52	-2.14
-1.53	-1.01	-1.66	-1.22	-0.865										-2.71	-3.52	-0.896	-0.666	-1.64	0.422	-2.32	-2.09	-1.95	-2.77	-3.45	-1.91
-2.39	-1.14	-1.88	-1.18	-0.023										-2.95	-3.05	-1.2	-0.969	-2.13	-0.296	-2.44	-2.11	-1.61	-2.71	-3.38	-1.12
-1.73	-0.504	-2	-1.84	-1.77										-2.76	-3.66	-1.18	-0.759	-2.34	0.0319	-4.2	-2.33	-1.92	-2.61	-3.51	-1.7
-1.48	-0.601	-2.24	-2.21	-0.733										-2.4	-2.87	-0.858	-0.769	-1.75	-0.456	-3.39	-2.1	-2.02	-2.56	-3.28	-2
-1.01	-1.06	-1.85	-2.12	-0.274										-3.12	-2.97	-1.84	-0.892	-2.41	-0.218	-2.55	-2.15	-1.78	-2.57	-3.33	-2.28
-0.61	0.233	-2.14	-1.88	-0.541										-3.42	-3.25	-1.23	-1.01	-1.69	0.192	-1.97	-2.24	-2.17	-2.78	-3.64	-1.85
-0.652	-0.498	-1.96	-1.15	-0.908										-3.6	-2.9	-2.26	-1.26	-2.21	1.23	-2.42	-2.57	-1.95	-2.82	-3.44	-1.15
-0.898	-0.94	-1.99	-1.73	-0.0993										-2.99	-3.04	-1.11	-1.27	-2.52	0.94	-1.57	-2.41	-2.29	-2.83	-3.11	-2.61
-1.3	-0.888	-1.87	-1.84	-1.55										-3.06	-3.05	-1.14	-1.26	-2.47	0.484	-2.6	-2.32	-2.11	-2.63	-3.81	-2.71
-1.67	1.09	-1.65	-1.72	-1.37										-2.64	-3.2	-0.37	-1.41	-2.69	1.03	-3.01	-2.05	-2.43	-2.53	-3.55	-1.83
-2.09	-0.229	-1.93	-2.04	-1.05										-2.91	-3.27	-0.629	-1.52	-2.81	0.957	-1.92	-2.01	-2.25	-2.73	-3.82	-2.54
-1.63	-0.818	-2.16	-2.52	-1.67										-2.57	-2.84	-0.664	-0.862	-2.79	0.576	-2.12	-1.97	-2.44	-2.74	-3.74	-2.53
-1.37	-1.02	-1.2	-2.44	-0.827										-2.95	-2.78	-0.75	-0.827	-2.5	-0.802	-2.55	-2.02	-2.75	-2.65	-3.77	-3.37
-1.8	-0.0864	-1.55	-2.34	-1.06										-2.68	-2.68	-0.612	-1.36	-3.17	0.0555	-2.02	-2.25	-2.48	-2.99	-3.5	-2.39
-1.9	-1.03	-1.62	-2.72	1.11										-2.96	-2.83	-0.927	-0.906	-2.29	-0.555	-2.24	-2.24	-2.34	-2.92	-3.73	-1.93
-1.84	-0.402	-1.97	-2.01	-0.824										-3.08	-3.25	-0.715	-1	-2.13	-0.896	-2.26	-2.15	-2.63	-2.94	-3.93	-1.47
-2.3	-0.414	-1.88	-2.06	-0.209										-2.66	-2.94	-1.09	-0.806	-2.62	0.0824	-1.14	-2.18	-2.52	-2.66	-3.58	-2.2
-1.82	-0.707	-2.02	-2.35	-0.471										-2.78	-3.09	-0.818	-0.378	-2.6	0.0772	-1.69	-1.95	-2.69	-2.53	-3.98	-1.96
-1.82	-0.868	-2.12	-2.41	0.0567										-2.67	-2.87	-0.863	-0.68	-2.39	0.194	-2.65	-2.24	-2.41	-2.81	-3.84	-2.06
-1.23	-0.359	-1.87	-2.25	-1.23										-2.7	-3	-1.25	-1.01	-2.07	0.82	-2.28	-2.48	-2.64	-2.79	-3.79	-2.2
-1.58	-1.2	-2.2	-2.24	-2.58										-2.76	-2.78	-1.44	-1.21	-2.53	0.919	-3.34	-2.47	-2.51	-2.68	-3.7	-1.86
-1.55	-0.593	-2.01	-2.09	-0.396										-3.16	-2.29	-1.72	-1.01	-1.79	0.482	-2.36	-2.38	-2.76	-2.74	-3.6	-1.95
-1.38	0.0144	-2.09	-2.41	-0.816										-2.78	-2.28	-0.801	-0.943	-1.78	0.823	-2.58	-2.35	-2.64	-2.33	-3.75	-2.87
-1.01	-0.936	-2.04	-2.08	-0.645										-2.65	-2.85	-1.1	-0.91	-1.89	0.837	-3.36	-2.64	-2.33	-2.88	-3.57	-2.54
-1.33	-0.0417	-2.21	-2.48	-1.52										-2.6	-2.25	-1.2	-1.23	-1.79	0.575	-2.26	-2.64	-2.33	-2.56	-3.68	-2.18
-1.46	-1.35	-1.95	-1.63	-2.21										-2.72	-2.32	-2.22	-1.32	-1.48	0.617	-2.16	-2.49	-2.33	-2.59	-3.43	-2.35
-0.93	-0.33	-2.07	-2.38	-1.22										-2.59	-2.1	-1.61	-1.31	-2.21	0.53	-2.93	-2.6	-2.4	-2.91	-3.4	-2.51
-1.05	-1.96	-1.8	-2.08	-1.04										-2.5	-2.45	-1.73	-1.15	-2.03	1.03	-2.52	-2.86	-2.29	-2.74	-3.65	-1.75
-0.752	-0.287	-2.27	-1.92	-0.662										-2.84	-2.73	-1.25	-1.28	-2.2	1.07	-2.99	-2.81	-2.16	-3.03	-3.4	-2.19
-1.02	0.36	-2.14	-2.05	-0.812										-2.71	-2.39	-1.82	-1.2	-1.84	0.607	-2.32	-2.44	-2.27	-2.94	-3.05	-1.52
-0.258	-0.837	-2.4	-1.75	-0.92										-2.63	-2.87	-0.925	-0.777	-2.05	0.378	-1.77	-2.07	-2.08	-2.48	-3.23	-1.66
-1.09	-0.863	-2.08	-2.26	-2.22										-2.28	-2.29	-1.38	-0.856	-1.4	0.82	-2.09	-2	-1.92	-2.3	-3.07	-1.03
-0.838	-0.477	-2.05	-2.41	-1.44										-2.03	-2.59	-1.21	-0.896	-2.84	0.785	-2.74	-2.05	-1.97	-2.21	-3.25	-1.56
-0.263	-0.575	-2.37	-1.06	-2.09										-1.78	-2.62	-1.16	-0.994	-2.43	1.32	-1.79	-2.08	-2.29	-2.8	-3.23	-1.52
-0.928	-0.0968	-2.23	-0.363	-0.3										-2.12	-2.69	-0.725	-0.404	-2.82	0.603	-2.44	-2.03	-2.48	-2.69	-3.25	-2.39
-1.61	-1.78	-2.13	-0.261	-0.992										-2.44	-2.77	-0.116	-0.587	-1.84	1.42	-2.05	-1.94	-2.41	-2.59	-3.75	-1.49
-0.807	0.528	-1.92	-0.579	-1.38										-1.57	-3.01	-0.981	-1.24	-2.75	0.756	-2.48	-1.9	-2.11	-2.38	-3.21	-1.06
-0.626	-1.04	-1.79	-0.665	-1.6										-1.92	-2.85	-0.142	-0.689	-3.3	0.407	-3.17	-1.87	-2.03	-2.67	-3.57	-1
0.0617	1.02	-1.59	-0.427	-1.8										-2.45	-2.73	-0.962	-0.607	-3.09	0.606	-2.06	-1.79	-2.02	-2.3	-3.43	-1.89
-1.23	-0.0952	-1.98	-1.31	-2.25										-2.2	-2.86	-1.45	-0.77	-2.83	0.843	-2.2	-1.65	-1.86	-2.42	-3.78	-1.48
-1.05	-1.11	-1.89	-0.688	-2.09										-2.59	-3.11	-1.61	-0.662	-2.4	0.7	-1.86	-1.22	-1.74	-2.57	-4.04	-1.79
-0.513	-0.145	-2.14	-0.952	-0.028										-2.91	-2.54	-1.11	-0.743	-2.64	1.15	-1.92	-1.17	-2.05	-2.34	-3.73	-1.64
-1.88	-0.421	-1.26	-0.9	-1.51										-2.35	-2.49	-1.03	-0.879	-2.83	1.32	-2.26	-1.15	-1.84	-2.52	-3.71	-1.9
-1.19	0.188	-1.77	-1.01	-2.17										-2.74	-2.47	-1.83	-0.959	-3.03	1.24	-2.91	-1.16	-2.26	-2.9	-3.34	-1.86
-1.62	0.286	-1.68	-0.721	-0.792										-2.91	-2.98	-1.79	-1.18	-1.57	0.386	-2.88	-1.41	-2.64	-2.82	-3.25	-1.49
-0.911	-0.272	-1.25	-0.87	-0.408										-2.7	-2.46	-1.18	-0.726	-1.91	-0.0773	-2.59	-1.35	-2.09	-3.07	-3.57	-2.18
-1.29	-0.753	-1.44	-1.02	-1.55										-3.46	-2.77	-1.69	-1.16	-3.13	-0.716	-3.56	-1.3	-2.09	-2.39	-3.84	-2.44
-1.23	-1.52	-1.48	-1.46	-1.21										-3.74	-2.92	-2.06	-1.05	-2.83	-0.0716	-2.5	-1.68	-2.19	-2.49	-3.74	-2.57
-1.99	-0.268	-1.69	-0.843	-2.22										-2.85	-3.1	-2.39	-1.12	-1.41	-0.312	-2.39	-1.64	-2.07	-2.95	-3.59	-2.54
-2.52	-0.55	-1.47	-1.34	-0.391										-3.05	-2.99	-1.62	-1.02	-2.27	-0.356	-2.72	-1.56	-2.02	-2.7	-3.52	-1.68
-1.85	-0.0157	-1.36	-2.1	-1.52										-3.49	-2.53	-1.85	-1.07	-1.95	-0.517	-3.21	-1.77	-1.89	-3.09	-3.89	-1.77
-1.9	0.287	-1.77	-1.87	-0.494										-2.93	-2.2	-2.1	-1.41	-2.35	-0.224	-3.2	-1.98	-1.33	-2.86	-3.46	-2.03
-2.14	-0.733	-1.25	-1.61	-1.68										-3.07	-2.35	-2.03	-0.717	-2.19	-1.02	-2.19	-1.88	0.527	-2.75	-3.44	-2.43
-1.77	-0.843	-1.31	-1.76	-3.07										-3.17	-2.3	-1.83	-0.676	-1.75	-0.505	-2	-1.84	-0.0441	-2.61	-3.56	-1.95
-2.61	-0.208	-0.983	-1.8	-1.51										-3.49	-2.48	-2.55	-1.22	-1.67	0.124	-2.6	-1.87	0.296	-2.65	-3.67	-1.27
-2.69	-1.75	-1.11	-1.66	-1.51										-2.87	-2.2	-2.11	-1.22	-2.12	0.103	-2.91	-1.88	-0.259	-2.93	-3.41	-1.62
-2.25	0.523	-1.15	-2.01	-1.7										-3.82	-2.63	-2	-1.05	-0.964	1.32	-3.7	-1.59	-0.442	-2.85	-3.58	-1.28
-1.99	0.703	-1.2	-2.33	-2.07										-3.32	-2.83	-1.6	-1.5	-1.21	1.02	-4.53	-1.63	-0.448	-2.62	-3.67	-2.27
-2.3	1.31	-1.1	-2.24	-1.33										-3.24	-2.7	-1.99	-1.1	-0.692	0.991	-2.77	-1.7	-0.468	-2.63	-3.56	-2.35
-1.8	0.822	-1.45	-2.06	-2.86										-3.02	-2.17	-1.23	-0.749	-1.28	0.493	-3.75	-1.75	-0.86	-2.9	-3.7	-2.03
-2.08	0.528	-1.33	-1.99	-1.05										-2.74	-3.02	-0.292	-1.21	-1.45	0.206	-3.2	-1.63	-0.491	-2.64	-3.96	-2.01
-2.78	-0.278	-1.43	-1.78	-0.755										-2.99	-3.3	-0.106	-1.61	-2.01	-0.00374	-2.89	-1.88	-0.622	-2.85	-4.05	-1.48
-2.24	-0.348	-1.48	-1.61	-1.83										-2.96	-2.71	-0.922	-1.37	-1.8	-0.00653	-3.43	-1.81	-0.639	-2.85	-4.37	-1.77
-2.06	-0.231	-1.26	-2.29	-1.14										-3.45	-2.63	-1.26	-1.45	-2.15	-0.211	-3.29	-1.83	-0.888	-2.87	-4.08	-2.09
-2.03	-0.335	-1.55	-2.19	-0.623										-3.14	-2.9	-1.42	-1.02	-2.17	-1.09	-3.61	-1.95	-1.52	-2.86	-4.16	-1.76
-1.94	-0.955	-1.6	-2.42	-0.285										-2.86	-2.43	-2.44	-1.15	-1.76	-0.657	-2.9	-1.89	-1.41	-2.97	-4	-2.15
-1.38	0.37	-1.7	-1.63	-1.03										-2.89	-2.99	-1.34	-1.12	-2.12	-0.458	-1.75	-1.62	-1.53	-3.14	-3.97	-1.38
-2.04	0.528	-2.23	-1.8	0.202										-3.05	-2.63	-2.01	-0.98	-2.33	-0.276	-2.34	-1.66	-1.45	-3.02	-4.17	-2.29
-2.29	0.201	-1.8	-2.24	-0.877										-3.01	-2.12	-1.82	-1.45	-2.2	-0.0762	-1.52	-1.64	-1.31	-3.09	-3.86	-2.37
-1.7	-0.143	-1.56	-2.4	-0.579										-2.88	-2.81	-2.01	-0.991	-2.28	0.121	-0.734	-1.67	-1.38	-2.91	-3.26	-2.72
-2.41	0.628	-1.69	-1.95	-1.05										-2.97	-2.56	-1.82	-1.01	-1.58	0.226	-2.04	-1.92	-1.11	-2.86	-3.21	-2.53
-2.9	0.631	-1.63	-1.99	-1.04										-2.74	-2.47	-1.59	-1.63	-2.65	0.823	-2.44	-1.72	-1.2	-2.67	-3.12	-2.05
-2.61	0.48	-2.23	-1.92	-0.871										-3.2	-2.66	-1.61	-1.69	-1.78	0.456	-1.81	-1.63	-1.21	-2.58	-3.62	-2.38
-2.64	0.221	-2.36	-1.96	-0.653										-3.18	-2.86	-2.01	-1.58	-1.82	0.737	-2.22	-1.8	-1.37	-2.9	-3.71	-2.62
-2.91	1.59	-2.6	-1.7	-0.945										-3.73	-2.99	-1.71	-1.2	-3.14	0.733	-2.26	-1.95	-1.06	-2.68	-3.85	-2.72
-2.54	-0.201	-1.99	-1.98	0.478										-3.72	-2.13	-1.58	-1.08	-3.52	0.606	-1.8	-1.56	-1.39	-2.69	-3.73	-2.06
-3.65	0.221	-1.98	-2.2	1.61										-3.26	-2.79	-1.59	-0.913	-3.45	0.271	-1.09	-1.79	-1.2	-2.91	-4.13	-2.43
-3.32	-0.826	-2.01	-2	-0.0394										-3.22	-2.93	-2	-1.53	-3.45	0.323	-2.13	-1.64	-1.33	-2.86	-4.1	-2.21
-1.87	-0.197	-1.89	-1.95	0.582										-2.68	-2.68	-1.71	-1.49	-3.18	0.501	-1.95	-1.8	-1.55	-2.98	-3.62	-2.16
-0.606	0.18	-1.51	-1.41	1.04										-3.07	-2.31	-1.04	-1.38	-2.74	0.82	-1.62	-1.48	-1.65	-2.74	-3.52	-2.59
-1.25	0.67	-1.98	-1.95	-0.283										-3.41	-3.29	-2.34	-1.14	-3.34	0.497	-2.24	-1.71	-1.53	-2.87	-3.96	-2.26
-1.02	-0.772	-1.49	-1.99	0.985										-3.76	-3.18	-2.13	-1.35	-2.87	0.614	-1.32	-1.74	-1.7	-2.85	-3.72	-3.04
-1.1	0.661	-1.79	-1.93	-0.575										-3.68	-2.99	-2.56	-1.25	-3.14	0.361	-2.28	-1.6	-1.71	-2.61	-3.31	-2.9
-1.15	0.472	-1.44	-2.16	-0.452										-3.82	-2.76	-3.26	-1.2	-3.9	0.337	-1.85	-1.72	-1.57	-2.69	-3.67	-3
-1.45	-0.831	-1.76	-1.58	1.45										-3.71	-3.29	-2.2	-1.27	-3.52	1.36	-2.23	-1.54	-1.58	-2.55	-3.51	-3.28
-1.51	-0.366	-1.83	-2.33	0.145										-3.39	-2.81	-2.19	-1.36	-3.13	0.546	-2.1	-1.48	-1.7	-2.44	-3.41	-3.3
-0.521	-0.313	-1.34	-1.62	-1.07										-3.3	-2.92	-2.23	-1.27	-2.53	0.246	-1.94	-1.41	-1.56	-2.63	-3.39	-3.61
-1.08	-1.38	-1.7	-1.79	-1.17										-3.32	-3.14	-1.83	-1.44	-3.17	0.386	-1.29	-1.44	-1.38	-2.83	-3.31	-2.46
-1.34	0.459	-1.55	-2.27	0.529										-3.32	-2.88	-2.71	-1.02	-2.26	0.618	-2.73	-1.79	-1.74	-2.97	-3.47	-2.24
-2.11	-0.0204	-1.89	-1.99	-1.65										-2.89	-2.78	-1.78	-0.221	-3.06	0.237	-1.09	-1.66	-1.6	-2.66	-3.57	-2.79
-1.36	0.135	-2.31	-2.06	-1.17										-3.21	-2.89	-1.9	-0.791	-3.02	0.0224	-2.21	-1.99	-1.61	-2.87	-3.73	-2.03
-1.69	-0.19	-2.12	-2.46	-0.0224										-3.11	-2.73	-1.53	-0.214	-2.56	-0.231	-2.45	-2.02	-1.88	-2.7	-4.03	-2.18
-1.82	0.286	-2.12	-2.44	0.16										-3.29	-2.77	-1.54	-0.617	-3.18	-0.156	-2.04	-1.91	-1.79	-2.42	-3.24	-3.12
-2.19	1.03	-1.78	-2.11	-0.993										-2.83	-2.74	-1.1	-0.821	-2.28	-0.668	-2.18	-1.74	-1.56	-2.28	-3.35	-1.59
-1.73	1.19	-1.9	-2.1	-1.41										-3.06	-2.99	-1.96	-1.28	-2.8	0.148	-2.61	-1.94	-1.55	-2.09	-3.54	-1.97
-2.75	-0.0843	-1.84	-2.07	-1.06										-3.17	-2.95	-1.81	-0.973	-3.47	-0.42	-2.05	-1.71	-1.3	-2.41	-3.75	-2.23
-2.74	0.279	-1.67	-2.5	-1.29										-3.56	-3.4	-1.38	-1.41	-3.73	-0.648	-1.62	-1.81	-1.35	-2.58	-3.3	-2.44
-3.29	1.64	-1.24	-2.57	1.24										-4.43	-2.93	-1.74	-1.01	-3.83	-0.331	-2.73	-2.03	-1.44	-2.39	-3.28	-2.09
-3.35	5.59e-06	-1.31	-2.38	-0.308										-3.85	-2.75	-1.07	-1.27	-2.73	-0.0237	-1.43	-2.11	-1.47	-2.94	-3.29	-2.63
-2.71	0.0774	-1.06	-2.61	0.0129										-4.01	-2.83	-1.87	-1.28	-3.23	-0.609	-2.25	-1.94	-1.48	-2.36	-3.26	-2.64
-2.24	1.4	-1.17	-3.06	-0.999										-3.68	-3.45	-1.87	-1.24	-2.47	-0.176	-3.15	-1.76	-1.34	-2.56	-3.3	-2.27
-2.97	-0.622	-1.73	-2.56	-1.05										-3.5	-3.52	-1.43	-1.08	-3.05	-0.597	-3.03	-1.77	-1.4	-2.65	-3.4	-2.71
-3.37	-0.477	-1.55	-2.72	-1.43										-4.04	-3.46	-1.18	-1.18	-2.35	-0.267	-1.58	-1.84	-1.66	-2.57	-3.54	-2.6
-3.46	0.117	-1.57	-2.44	-1.83										-4.03	-3.69	-0.953	-0.973	-2.66	0.0203	-2.04	-1.92	-1.43	-2.64	-3.82	-2.82
-3.4	-0.0745	-1.81	-2.89	-1.56										-3.84	-3.66	-1.45	-1.11	-2.99	0.516	-2.68	-2.15	-0.101	-2.88	-3.69	-2.48
-2.96	0.0322	-1.26	-2.41	-1.42										-3.51	-3.33	-1.68	-0.723	-1.66	0.389	-2.06	-1.97	0.728	-2.81	-3.59	-2.25
-3.16	1.31	-1.28	-2	-0.387										-3.39	-3.59	-1.76	-0.969	-1.61	-0.34	-1.93	-1.89	0.548	-2.82	-3.61	-2.1
-3.11	-0.884	-1.16	-2.05	-1.46										-2.58	-3.95	-2.18	-0.161	-2.5	-0.584	-1.49	-2.08	1.53	-2.6	-3.37	-1.64
-2.89	0.483	-1.22	-2.2	-1.65										-2.78	-3.36	-1.98	-0.0745	-1.99	-0.37	-1.92	-2.01	2.62	-2.92	-3.48	-2.17
-3.03	0.0278	-1.81	-2.46	-2										-3.05	-3.3	-3.26	-0.413	-2.15	-0.292	-3.07	-1.85	2.24	-2.9	-3.74	-2.54
-3.24	0.748	-1.84	-1.67	-2.11										-2.8	-3.21	-1.47	-0.855	-2.44	-0.215	-1.29	-1.89	2.52	-2.5	-3.67	-1.82
-4.33	0.489	-1.95	-2.12	-1.26										-3.2	-3.82	-1.82	-0.56	-2.29	-0.517	-2.63	-1.98	2.42	-2.69	-3.62	-2.33
-2.98	0.469	-1.65	-2.17	-1.25										-3.35	-3.36	-2.08	-0.907	-1.86	-0.547	-2.63	-1.71	2.37	-2.65	-3.35	-1.99
-2.37	0.855	-1.5	-2.04	-1.7										-3.14	-3.46	-2.5	-0.968	-2.57	-1.21	-2.37	-1.93	2.51	-2.63	-3.48	-2.45
-2.64	0.973	-2	-1.72	-0.971										-3.06	-3.25	-2.77	-1.38	-2.4	0.0285	-2.24	-1.77	2.53	-2.19	-3.44	-1.41
-3.15	0.239	-1.9	-2.29	-2.89										-3.25	-3.82	-1.68	-1.23	-2.42	-0.738	-1.76	-1.89	2.48	-2.22	-3.64	-1.76
-3.08	-1.28	-1.58	-2.3	-2.77										-3.17	-3.14	-2.09	-1.02	-2.1	-0.331	-2.94	-1.86	2.25	-2.1	-3.76	-1.47
-2.46	1.09	-1.84	-2.8	-0.834										-2.84	-3.16	-2.27	-1.01	-2.29	-0.259	-1.53	-1.5	2.18	-2.4	-3.64	-1.4
-3.28	0.805	-1.53	-2.67	-1.98										-2.97	-3.36	-2.49	-0.663	-2.82	0.248	-1.4	-1.26	2.29	-2.49	-3.87	-2.43
-3.13	-1.27	-1.79	-2.33	-0.0718										-3.34	-3.11	-1.12	-0.594	-1.81	0.678	-2.4	-1.24	1.78	-2.48	-3.37	-1.51
-4.04	-0.128	-1.64	-2.92	-1.59										-3.43	-3.31	-0.638	-0.42	-2.61	0.688	-1.69	-1.46	1.2	-2.37	-3.86	-2.09
-3.67	0.233	-1.7	-2.35	-1.23										-3.96	-3.29	-1.53	-0.935	-3.02	0.232	-1.89	-1.58	1.64	-2.43	-3.88	-1.98
-3.7	1.16	-1.61	-2.35	0.199										-3.44	-3.32	-1.46	-0.735	-2.45	-0.0928	-3.42	-1.64	1.2	-2.37	-3.59	-2.2
-3.56	1.13	-1.87	-2.23	-0.634										-2.98	-3.66	-0.953	-0.0466	-1.95	-0.62	-2.43	-1.86	1.48	-2.65	-3.59	-1.79
-3.75	1.05	-1.47	-2.52	-1.98										-2.41	-3.32	-1.97	-0.652	-1.91	-0.261	-1.79	-1.81	1.61	-2.76	-3.65	-2.16
-2.76	-0.986	-1.8	-2.42	-0.196										-2.39	-3.2	-1.52	-0.661	-1.53	-0.478	-3.15	-1.73	1.06	-2.62	-3.65	-1.9
-1.64	-0.0343	-1.33	-2.35	-0.353										-2.92	-2.78	-1.46	-1.01	-2.07	-1.08	-3.3	-1.73	0.991	-2.35	-3.72	-1.89
-0.789	-0.411	-1.27	-2.22	-1.27										-3.17	-3.13	-1.85	-1.41	-2.8	-1.04	-2.73	-1.76	1.3	-2.55	-3.94	-1.91
-1.81	0.858	-1.41	-2.65	-0.13										-3.64	-3.19	-1.87	-0.372	-1.76	0.244	-3.31	-1.99	1.49	-2.52	-3.79	-1.87
-1.31	0.111	-1.64	-2.71	-0.982										-2.88	-3.48	-1.46	-0.857	-2.03	0.908	-3.16	-1.42	1.52	-2.3	-3.5	-1.61
-2.24	0.61	-1.89	-3.03	-2.27										-2.71	-3.13	-1.77	-1.17	-2.21	0.656	-2.82	-0.842	1.05	-2.24	-3.67	-1.99
-3.4	1.7	-1.34	-2.31	-0.479										-2.35	-2.83	-2.17	-1.11	-1.74	-0.168	-3.7	-0.659	0.813	-2.48	-3.52	-2.16
-3.43	-0.244	-1.32	-2.68	0.488										-2.75	-3.28	-2.02	-1.15	-1.52	-0.693	-3.05	-0.505	0.931	-2.07	-3.64	-1.73
-4.5	-0.429	-1.36	-1.99	-0.632										-3.02	-3.73	-2.62	-1.11	-1.63	-1.21	-3.24	-0.278	0.701	-2.17	-3.8	-1.95
-2.74	0.526	-1.47	-2.83	-1.22										-3.45	-3.46	-2.32	-0.814	-1.96	-0.18	-2.91	-0.583	0.814	-1.73	-3.47	-1.17
-1.52	-1.97	-1.41	-2.48	-1.58										-2.89	-3.44	-2.58	-0.585	-1.85	-0.113	-3.97	-0.426	0.871	-1.82	-3.69	-1.71
-2.41	-0.932	-2.08	-2.66	-1.7										-2.62	-3.44	-2.22	-1.29	-2.72	0.581	-3.42	-0.628	1.26	-1.94	-3.17	-1.59
-2.29	-0.952	-1.67	-2.15	-0.385										-3.21	-3.19	-1.4	-1.33	-3.69	-0.139	-3.15	-0.551	1.57	-1.49	-3.85	-1.53
-2.35	-0.512	-1.6	-2.6	-2.09										-3.12	-3.06	-1.56	-0.698	-4.36	-0.00622	-3.35	-0.782	1.29	-2.05	-3.38	-1.78
-3.07	-0.224	-1.6	-2.9	-1.06										-3.18	-2.85	-0.614	-0.896	-3.93	-0.49	-3.25	-0.712	1.51	-1.63	-3.29	-2.23
-2.29	-0.131	-1.95	-2.21	0.454										-3.44	-3.11	-1.59	-1.04	-3.02	-0.713	-3.18	-0.926	1.23	-1.95	-3.2	-1.57
-2.23	-0.428	-1.43	-2.68	-0.597										-2.88	-3.15	-2.35	-0.978	-1.92	-0.312	-3.94	-0.979	1.24	-1.72	-3.15	-1.99
-1.93	0.555	-1.8	-2.33	-0.885										-3.08	-2.94	-1.98	-0.572	-2.54	-0.826	-2.71	-0.67	1.36	-1.85	-3.42	-1.74
-2.08	0.142	-1.65	-2.7	-0.136										-2.68	-3.35	-1.47	-0.552	-2.4	-0.205	-3.53	-0.903	1.26	-1.73	-3.27	-1.89
-2.13	-0.243	-1.9	-2.47	-1.94										-2.74	-3.47	-0.957	-0.307	-2.96	0.278	-4.08	-0.777	1.2	-1.66	-3.63	-1.45
-3.05	-0.128	-1.44	-2.67	-0.419										-3.08	-3.27	-1.07	0.103	-3.97	0.0358	-4.03	-0.976	1.6	-1.91	-3.6	-2.03
-2.69	0.246	-1.4	-2.56	-0.464										-2.97	-3.05	-1.8	-0.351	-3	0.0529	-2.94	-0.976	1.63	-1.82	-3.07	-1.4
-3.3	-0.239	-1.59	-2.67	-2.38										-3.12	-2.9	-2.15	-0.0498	-2.31	0.803	-2.68	-1.03	1.11	-1.94	-3.63	-1.29
-2.58	-0.554	-1.24	-2.01	-1.98										-3.16	-2.84	-1.82	-0.295	-2.07	0.786	-2.33	-0.936	0.901	-1.85	-3.46	-2.17
-3.25	-0.628	-1.59	-2.49	-2.05										-3.61	-3.01	-1.31	-0.534	-1.54	0.483	-2.28	-1.05	1.01	-0.962	-3.99	-2.52
-4.04	-0.637	-1.74	-2.35	-1.34										-3.35	-2.76	-0.68	-1.23	-1.85	1.03	-2.56	-1.09	0.996	-0.0458	-3.89	-2.36
-3.11	-0.858	-1.53	-2.93	-2.27										-3.15	-2.98	-0.634	-0.996	-2.62	0.395	-3.19	-1.2	1.47	0.619	-3.75	-2.21
-2.28	1.14	-1.4	-3.03	-1.46										-3.25	-2.67	-0.865	-0.682	-3.34	-0.0878	-2.8	-1.2	0.954	0.243	-3.54	-1.97
-3.35	-0.315	-1.51	-3	-2.26										-3.27	-2.88	-1.4	-0.91	-2.43	-0.445	-3.01	-1.2	0.995	0.14	-3.51	-1.67
-3.44	0.83	-1.42	-2.1	-0.349										-2.8	-2.32	-1.41	-1.29	-2.75	-0.997	-3.69	-1.46	0.768	0.00116	-3.72	-2.5
-2.72	-0.602	-1.28	-2.04	-1.95										-2.79	-1.82	-2.3	-1.53	-1.88	-0.504	-3.47	-1.24	0.518	-0.0943	-3.54	-1.57
-4.01	-0.467	-1.59	-2.42	-1.84										-2.6	-2.41	-2.5	-1.65	-2.13	-0.818	-2.32	-1.62	0.963	-0.0297	-3.33	-1.98
-2.57	-0.176	-1.84	-2.4	-2.47										-2.31	-2.16	-2.04	-1.15	-0.91	-0.382	-2.36	-1.32	1.92	-0.351	-3.4	-1.97
-2.58	-1.27	-1.68	-2.99	-1.39										-2.54	-2.66	-1.43	-0.898	-0.475	-0.141	-2.79	-1.17	1.69	-0.163	-3.44	-1.5
-2.86	-0.218	-2.51	-2.94	-1.1										-2.77	-3.1	-1.54	-1.44	-0.649	0.139	-3.12	-1.43	1.79	-0.339	-3.7	-2.34
-4.08	0.11	-2.44	-3.02	-2.27										-3.32	-2.69	-1.64	-1.51	-2.28	0.215	-3.4	-1.54	1.95	-0.312	-3.28	-1.9
-3.49	-1.06	-2.07	-3.17	-1.33										-3.12	-2.99	-1.53	-1.26	-1.61	1.03	-2.98	-1.67	1.64	-0.829	-3.43	-2.39
-2.99	0.261	-1.64	-2.95	-0.45										-3.25	-3.24	-1.88	-0.888	-1.46	0.848	-2.78	-1.47	1.52	-0.433	-3.61	-2.53
-3.64	-0.594	-1.56	-2.66	-2.64										-2.48	-2.79	-1.97	-0.978	-1.35	-0.31	-2.33	-1.81	1.11	-0.681	-3.58	-2.51
-3.21	-0.262	-1.45	-1.49	-1.02										-2.71	-2.85	-1.21	-0.952	-1.74	0.757	-2.42	-1.75	0.859	-0.8	-3.63	-2.93
-3.17	-0.338	-1.73	-1.77	0.254										-2.82	-3.04	-1.24	-1.53	-1.48	1.75	-2.71	-1.58	1.13	-1.05	-3.65	-2.98
-3.22	-0.526	-1.59	-1.51	-1.85										-2.65	-3.01	-1.74	-0.591	-2.85	1.86	-2.74	-1.79	1.18	-0.978	-3.73	-2.06
-4.56	-0.514	-1.93	-1.78	-0.228										-2.9	-2.89	-1.81	-0.738	-1.72	2.25	-3.18	-1.8	1.15	-1.46	-3.47	-1.69
-2.66	-1.25	-1.88	-2.43	-0.965										-3.39	-3.29	-2.01	-1.43	-2.22	0.968	-3.18	-1.7	1.27	-0.908	-3.59	-1.9
-2.8	-1.24	-2.08	-2.46	-2.07										-3.15	-3.55	-2.3	-1.75	-1.53	1.25	-2.57	-1.5	0.91	-1.04	-4.2	-2.67
-3.57	0.451	-1.56	-2.64	-1.44										-3.32	-3.2	-1.79	-1.01	-1.14	0.249	-2.5	-1.76	0.834	-0.606	-4.03	-2.32
-2.77	-1.06	-1.6	-2.32	-0.947										-2.84	-2.84	-3.02	-1.21	-1	0.436	-3.13	-1.76	0.946	-0.753	-3.21	-2.05
-1.63	-0.306	-1.27	-2.11	-1.83										-2.99	-1.57	-2.49	-1.01	-0.232	0.117	-2.89	-1.61	0.429	-0.59	-2.85	-1.93
-3.63	-1.59	-1.35	-2.44	-1.41										-2.5	-2.14	-2.24	-1.09	-0.586	-0.0434	-3.32	-1.74	0.741	-0.705	-3.15	-2.3
-2.72	-0.304	-1.57	-2.61	-0.611										-3.02	-1.98	-2.01	-1.49	-0.685	0.021	-2.69	-1.5	0.347	-0.681	-2.96	-1.4
-3.26	0.702	-1.63	-2.39	-1.51										-3.66	-2.59	-0.998	-1.57	-2.77	0.427	-3.29	-1.67	0.312	-0.709	-2.85	-2.06
-2.82	0.883	-1.72	-2.63	-1.63										-3.74	-2.48	-0.792	-1.49	-3.24	0.857	-2.35	-1.64	1.41	-0.45	-2.93	-2.68
-2.76	0.0162	-1.59	-2.34	-1.51										-3.34	-2.9	-1.22	-1.26	-2.8	0.278	-3.16	-1.86	2.39	-0.0452	-2.65	-2.29
-2.83	-0.968	-2.07	-2.46	-0.784										-3.24	-2.57	-1.11	-1.03	-2.84	-0.726	-3.34	-1.9	2.55	-0.168	-2.55	-1.73
-1.69	-1.4	-2.11	-2.53	-1.52										-2.81	-2.22	-1.61	-1.16	-2.34	-1.56	-2.84	-2	2.4	-0.282	-2.66	-1.67
-2.3	-0.575	-2.34	-2.6	-0.684										-2.55	-1.86	-1.17	-1.63	-0.888	-0.527	-3.06	-1.69	2.69	-0.338	-2.96	-1.58
-0.928	0.0761	-2.06	-2.83	-1.06										-2.46	-2.91	-2.26	-1.03	-0.595	0.296	-1.63	-1.41	2.57	-0.287	-3.25	-1.59
-1.36	-0.57	-1.65	-2.35	-1.74										-2.66	-2.92	-1.94	-0.999	-1.17	-0.22	-2.96	-1.67	2.83	-0.564	-2.91	-1.63
-2.78	-0.53	-2.06	-2.07	-1.04										-2.54	-2.76	-2.37	-1.63	-1.46	0.329	-1.95	-1.99	3.07	-0.307	-1.97	-2.05
-2.61	-0.902	-1.62	-2.17	-1.39										-3.24	-2.86	-2.15	-1.33	-1.85	-0.164	-3.4	-1.8	2.72	-0.501	-2.46	-2.18
-2.35	-1.2	-1.98	-2.39	-1.74										-3.16	-2.9	-2.12	-0.958	-1.98	-0.607	-2.85	-1.89	2.51	-0.79	-2.55	-2.19
-2.23	-1.04	-1.96	-2.26	-0.176										-3.14	-2.87	-2.26	-1.36	-1.51	0.139	-3.4	-2.11	2.53	-0.79	-2.24	-1.95
-1.6	-0.109	-2.28	-2.41	-0.171										-3.13	-3.29	-2.4	-1.61	-1.41	0.239	-3.14	-2.01	2.12	-0.698	-2.42	-2.01
-3.05	-0.473	-3.01	-2.79	-1.84										-3.37	-2.81	-2.55	-1.74	-0.977	0.0911	-2.54	-1.91	2.36	-0.842	-2.77	-2.61
-1.89	-0.361	-2.41	-2.29	-1.79										-2.72	-3.04	-1.85	-1.5	-0.398	0.0945	-2.72	-1.95	2.34	-0.791	-2.62	-2.54
-2.38	-0.464	-2.17	-2.53	-1.92										-2.41	-2.85	-1.39	-1.56	-1.15	0.323	-2.17	-1.96	2.33	-1.16	-2.67	-2.15
-2.38	-1.44	-2.16	-2.6	-1.74										-2.41	-2.87	-1.48	-1.34	-1.58	0.132	-2.19	-1.98	2.32	-1.2	-3.04	-1.77
-2.32	-1.02	-2.49	-2.61	-1.49										-2.17	-2.82	-2.34	-1.15	-2.68	0.122	-1.99	-1.72	2.19	-1.08	-3.13	-1.1
-1.32	-1.33	-2.69	-2.27	-1.75										-1.94	-2.79	-1.5	-0.856	-2.25	-0.291	-2.72	-2.16	2.01	-1.17	-3.01	-1.21
-1.64	0.967	-2.26	-2.64	-1.99										-1.92	-3.3	-1.96	-0.764	-2.05	-0.735	-2.85	-1.76	1.38	-1.15	-3.01	-1.37
-1.84	-0.0975	-2.36	-2.41	-1.79										-2.17	-3.32	-2.75	-0.426	-1.63	-0.731	-2.51	-1.81	1.78	-0.959	-3.44	-1.11
-1.9	0.028	-2.13	-2.75	-0.625										-2.46	-3.28	-2.66	-0.37	-1.71	-0.504	-2.5	-2.06	1.67	-0.659	-2.83	-1.61
-2.81	-0.561	-2.05	-2.79	-0.553										-3.42	-2.93	-3.21	-0.621	-0.957	-0.746	-2.2	-2.13	1.53	-0.829	-3.07	-1.14
-2.43	-1.73	-1.95	-2.23	-0.0753										-2.7	-2.91	-2.02	-0.236	-1.41	-0.109	-2.83	-2.13	1.61	-0.615	-3.02	-1.3
-3.55	-0.316	-1.85	-1.92	-0.644										-2.38	-3.03	-2.64	-0.228	-2.98	-0.348	-2.55	-2.01	1.38	-0.805	-2.99	-1.77
-3.49	0.304	-2.07	-2.12	-1.72										-2.78	-3.04	-2.06	-0.1	-2.84	-0.744	-3.53	-2.03	1.41	-1.07	-3.23	-2.14
-3.03	-0.324	-1.47	-1.93	-0.858										-2.66	-2.51	-1.21	-0.0958	-3.12	-0.283	-2.63	-1.98	1.41	-0.705	-3.14	-2.57
-2.02	-0.218	-1.44	-2.46	-0.574										-3.15	-1.96	-1.67	-0.364	-1.1	-0.785	-3.07	-2.11	1.18	-1.03	-3.16	-2.65
-2.2	-0.0293	-1.49	-1.92	0.225										-3.89	-2.72	-1.56	-0.5	-0.756	-0.465	-3.09	-2.22	1.22	-0.975	-3.02	-2.62
-1.59	-1.8	-1.61	-2.08	-1.26										-3.34	-2.47	-0.596	-0.502	-2.25	-1.05	-3.07	-1.77	1.35	-1.02	-3.43	-1.92
-2.13	-0.765	-1.3	-1.9	-0.489										-2.29	-2.54	-0.329	-0.184	-2.11	-1.03	-2.15	-1.86	1.06	-1.25	-3.58	-1.8
-2.31	0.423	-1.54	-2.19	0.199										-2.42	-2.81	-1.03	-0.362	-2.56	-0.677	-1.83	-2.18	1.32	-1.27	-3.06	-2.08
-1.84	-0.147	-2.27	-2.59	-0.638										-2.96	-2.87	-0.711	-0.373	-2.82	-0.0873	-3.19	-2.21	0.977	-0.992	-2.64	-1.7
-2.05	-0.573	-1.9	-1.73	-2.58										-2.48	-2.39	-0.722	-0.48	-2.91	-0.353	-3.2	-2.22	1.04	-1.52	-2.33	-2.71
-1.03	0.1	-1.97	-1.7	-1.12										-3.23	-2.23	-1.67	-0.212	-3.71	-0.193	-3.01	-2.37	1.03	-1	-2.68	-1.7
-1.16	0.617	-1.75	-1.73	-0.638										-2.95	-1.73	-1.32	-0.231	-1.81	0.368	-2.72	-2.17	0.67	-1.25	-2.83	-1.23
-1.95	-0.337	-1.93	-2.28	-0.906										-3.18	-2.51	-0.511	-0.67	-0.961	0.593	-3.74	-2.14	1.05	-1.53	-3	-1.74
-2.7	-0.237	-1.97	-1.98	-0.951										-2.66	-2.63	-0.393	-0.334	-0.147	0.195	-2.89	-2.28	0.869	-1.31	-2.93	-1.68
-2.6	-0.787	-1.21	-2.2	-1.12										-2.16	-2.7	-1.36	-0.385	-0.409	0.217	-3.24	-2.09	0.893	-1.61	-2.99	-2.06
-3.89	-0.246	-1.34	-2.32	-1.01										-2.29	-2.04	-1.57	-0.127	-0.288	-0.109	-3.41	-1.75	0.759	-1.32	-3.11	-1.73
-3.76	0.348	-1.28	-2.01	-0.0447										-1.99	-2.35	-0.379	-0.458	-0.851	-0.706	-3.03	-1.53	0.258	-1.39	-3.01	-1.42
-3.19	-0.566	-0.464	-2.72	-0.301										-2.53	-2.55	-0.557	-0.679	-0.292	-0.622	-4.14	-1.73	-0.139	-1.4	-2.56	-1.23
-2.01	0.0147	-0.582	-2.41	-0.865										-3.34	-1.97	-0.934	-1.33	-1.02	-0.932	-3.1	-1.5	-0.218	-1.19	-2.53	-1.9
-1.65	-0.0716	0.0945	-2.47	-0.162										-2.58	-2.2	-1.07	-1.44	-0.666	-1.48	-3.44	-1.57	0.125	-1.68	-2.64	-1.84
-2.49	-0.412	-0.663	-2.9	-1.2										-2.45	-2.23	-0.96	-1.33	-0.654	-1.52	-3.11	-1.73	0.354	-1.27	-2.92	-1.45
-2.48	0.0378	-0.119	-2.68	-1.41										-2.2	-2.19	-0.808	-1.13	-1.72	-0.924	-2.59	-1.61	-0.00776	-1.16	-2.73	-2.22
-2.58	-0.225	-0.0544	-2.38	-0.935										-2.23	-2.24	-0.463	-1.28	-1.64	-1.42	-2.33	-1.75	-0.0611	-1.54	-3.01	-1.9
-2.84	0.952	-0.038	-2.79	-1.82										-2.24	-3.04	-1.16	-0.904	-1.64	-1.25	-3.01	-1.68	0.167	-1.63	-2.92	-1.83
-3.43	0.509	-0.256	-2.27	-1.13										-2.64	-2.22	-1.48	-0.819	-1.33	-1.54	-2.63	-1.74	0.11	-1.7	-2.72	-1.52
-2	-0.344	-0.506	-2.7	-0.679										-2.87	-2.6	-1.32	-1.23	-1.59	-0.949	-3.73	-1.61	-0.0859	-1.33	-2.72	-2.18
-0.584	0.59	-0.485	-2.52	-1.3										-3.23	-2.93	-1.44	-1.21	-1.09	-1.07	-4.1	-1.74	0.176	-1.57	-3.05	-2.05
-1.73	-0.177	-0.405	-2.85	0.218										-3.32	-2.09	-1.42	-1.37	-1.03	-1.21	-3.51	-1.61	-0.168	-1.65	-3.14	-1.91
-1.57	-0.422	-0.491	-2.42	-0.557										-3.14	-2.2	-1.45	-1.34	-1.42	-0.846	-3.62	-1.71	-0.121	-1.5	-3.18	-2.07
-2.89	-0.634	-0.634	-2.67	-1.23										-2.73	-2.54	-1.84	-0.956	-1.63	-0.00168	-3.62	-1.83	-0.44	-1.59	-3.09	-1.63
-2.79	-0.134	-0.979	-2.44	-0.781										-2.02	-2.76	-2.06	-1.72	-1.93	-0.281	-4.86	-1.77	-0.583	-1.51	-3	-1.75
-3.03	2.41	-1.09	-1.87	-0.819										-2.94	-2.47	-1.62	-0.978	-2.25	-0.362	-3.21	-1.54	-0.724	-1.46	-2.77	-1.28
-3.15	0.0242	-0.911	-2.36	-0.71										-2.68	-2.22	-2.59	-0.967	-2.75	-0.222	-2.94	-1.76	-0.716	-1.78	-2.65	-1.67
-2.9	0.557	-1.02	-2.71	-1.35										-2.49	-2.56	-2.34	-0.937	-1.54	-0.782	-4.09	-1.6	-0.523	-1.92	-2.9	-2
-1.33	0.495	-1.14	-2.55	-1.19										-2.8	-2.2	-1.71	-0.704	-2.19	-0.622	-3.47	-1.68	-0.0413	-1.84	-2.66	-2.07
-2.6	0.904	-1.28	-2.91	0.138										-2.43	-1.94	-2	-0.65	-1.44	-0.382	-3.45	-1.27	-0.502	-1.79	-3.06	-1.24
-4.16	0.783	-1.22	-3.06	-0.518										-2.21	-2.59	-2	-0.903	-2.38	-0.221	-2.71	-0.79	-0.618	-1.91	-2.24	-1.84
-3.8	0.883	-1.1	-2.82	-1.26										-2.3	-2.62	-1.28	-1.42	-1.72	-0.551	-2.81	0.563	-0.57	-1.67	-2.98	-2.29
-3.38	0.357	-0.773	-2.64	-0.975										-2.66	-2.49	-0.523	-0.807	-2.5	-0.265	-1.84	1.67	0.0172	-1.71	-2.85	-2.38
-2.45	-0.145	-1.11	-1.97	0.851										-2.65	-2.38	-0.314	-1.1	-1.96	0.0167	-1.36	1.58	-0.131	-1.2	-3.03	-1.34
-1.22	-0.0176	-1.05	-2.31	-0.184										-2.98	-1.58	0.241	-1.53	-1.56	-0.213	-2.74	1.48	0.00199	-1.7	-2.92	-1.65
-1.43	0.137	-1.02	-2.56	-0.0356										-2.49	-1.17	0.226	-1.28	-1.03	0.243	-3.06	1.55	-0.0239	-1.74	-2.66	-2.1
-1.25	1.13	-0.913	-2.69	-0.226										-2.43	-0.649	-0.327	-0.79	-1.49	-0.29	-1.98	1.35	-0.205	-0.962	-2.57	-1.23
-2.4	0.848	-0.921	-2.7	-0.794										-2.08	-0.994	0.114	-0.449	-2.57	-0.662	-3.51	1.35	-0.232	-0.254	-2.92	-1.57
-3.4	0.537	-0.216	-2.34	-1.23										-1.79	-0.994	0.806	-0.42	-4.5	-0.522	-3.22	1.16	-0.35	0.0331	-2.94	-2.59
-2.2	-0.143	-1.34	-2.74	-0.793										-1.9	-1.47	-0.347	-0.871	-3.09	-0.466	-3	0.979	-0.0632	0.495	-3.01	-1.29
-2.01	0.897	-1.14	-3.08	0.784										-2.01	-1.88	0.38	-1.07	-2.74	-0.442	-3.15	0.806	-0.316	0.201	-2.9	-1.61
-2.01	1.27	-1.16	-2.73	-0.588										-2.36	-1.83	-0.639	-1.46	-2.51	0.303	-3.21	0.565	-0.269	-0.152	-2.75	-2.53
-2.11	-0.0869	-0.898	-2.16	-0.495										-2.87	-1.42	-0.517	-1.14	-3.6	0.129	-3.15	0.284	-0.397	-0.483	-2.9	-2.3
-2.51	-0.257	-1.16	-2.96	-0.617										-3.13	-2.12	-1.46	-0.619	-2.49	0.201	-4.75	0.128	-0.652	-0.629	-2.92	-1.84
-3.04	-0.198	-1.22	-2.47	-1.04										-2.32	-2.49	-0.974	-0.523	-2.87	-0.166	-3.54	0.14	-0.465	-0.258	-2.68	-0.883
-3.55	0.00644	-0.996	-2.99	-1.46										-3.16	-1.84	-1.47	-0.608	-1.72	0.0276	-2.69	0.155	-0.736	-0.49	-2.75	-0.738
-3.01	0.191	-0.846	-2.79	-0.476										-3.04	-1.51	-1.56	-1.13	-1.7	-0.457	-2.32	0.393	-0.727	-0.37	-2.92	-1.55
-2.08	0.254	-1.1	-3.14	-0.598										-2.65	-1.56	-0.99	-0.59	-1.29	0.306	-3.78	0.293	-0.688	-0.63	-2.88	-1.68
-2.88	0.453	-1.07	-2.42	-0.479										-2.53	-0.536	-1.45	-1.28	-1.28	-0.0688	-3.17	0.408	-0.443	-0.434	-3.05	-2.28
-2.33	1.42	-0.622	-2.88	-1.06										-3.2	-1.28	-2.04	-1.23	-0.264	-0.0543	-2.97	0.655	0.0854	-0.576	-2.92	-1.92
-1.54	1.95	-0.992	-3.21	-2.34										-3.51	-1.34	-1.5	-0.686	0.171	0.188	-2.38	0.245	-0.129	-0.664	-2.79	-1.73
-1.78	0.267	-1	-2.9	-1.57										-2.73	-1.1	-1.26	-0.759	0.0365	1.05	-2.93	0.358	-0.576	-0.53	-2.45	-1.72
-0.275	-0.461	-0.986	-2.5	-0.981										-2.74	-1.47	-1.16	-0.0736	-1.1	0.773	-2.87	0.339	-0.474	-0.989	-2.96	-1.91
-1.85	0.865	-0.896	-3.05	-0.897										-2.51	-1.47	-1.31	-1.13	-2.31	0.0648	-2.04	0.156	-0.582	-0.673	-2.8	-1.46
-1.46	-0.368	-1.22	-3.21	-1.14										-2.55	-1.82	-1.62	-0.8	-1.58	0.863	-3.19	0.131	-0.777	-0.692	-2.68	-0.962
-1.23	-1.14	-1.18	-3.06	-1.25										-2.18	-2.02	-0.699	-1.09	-1.61	0.975	-1.97	0.135	-0.714	-0.871	-2.96	-1.41
-2.62	-0.358	-1.41	-3.26	-0.888										-2.42	-2.31	-1.19	-0.941	-1.1	0.611	-2.79	0.122	-0.325	-1.17	-2.79	-2
-1.17	-1.11	-1.3	-2.87	0.0118										-2.37	-2.48	-1.42	-1.05	-0.755	0.632	-2.61	-0.0256	-0.843	-0.888	-2.89	-1.23
-1.95	0.244	-1.5	-2.85	-0.891										-2.57	-2	0.372	-0.82	-2.45	0.213	-2.52	-0.233	-1.03	-1.34	-2.9	-1.02
-1.51	-0.877	-1.53	-2.91	-0.992										-2.53	-1.94	0.286	-0.872	-1.29	-0.387	-2.1	-0.185	-1.07	-1.18	-3.06	-1.12
-2.03	0.319	-1.62	-2.61	-0.9										-2.19	-2.12	1.19	-0.602	-1.48	-0.143	-3.36	-0.186	-1.05	-1.31	-3	-0.907
-1.36	-1.04	-1.79	-2.8	-0.159										-2.58	-1.87	0.826	-0.492	-0.0365	0.425	-1.54	-0.0933	-0.932	-1.4	-3.11	-1.2
-3.1	0.864	-1.77	-2.61	-0.448										-2.32	-2.34	1.11	-0.698	-1.26	-0.451	-2.17	-0.178	-1.11	-1.1	-3.07	-1.02
-1.6	-0.101	-1.6	-2.77	0.000596										-2.41	-2.62	1.23	-1.01	0.043	-0.191	-2.72	-0.15	-1.19	-1.2	-2.92	-1.58
-1.46	-0.214	-1.73	-2.42	-0.573										-3.19	-2.75	1.64	-0.794	-0.443	-0.00548	-3.88	-0.45	-1.07	-1	-3.03	-1.18
-2	0.0995	-1.7	-3.14	-1.16										-3.5	-2.09	1.07	-0.332	-1.32	0.266	-2.3	-0.495	-1.18	-1.17	-3.03	-1.5
-2.32	0.594	-1.71	-2.79	-0.259										-3.36	-2.08	0.717	-0.238	-1.52	-0.22	-2.01	-0.611	-1.02	-0.983	-2.73	-0.939
-2.11	0.0196	-1.3	-2.82	0.632										-2.73	-1.88	1.34	-0.877	-1.64	-0.674	-2.1	-0.276	-1.38	-1.19	-2.76	-1.55
-1.83	0.298	-1.15	-2.33	-0.653										-2.34	-2.46	0.839	-1.53	-1.27	-0.0548	-2.47	-0.628	-1.2	-1.11	-2.83	-1.98
-1.5	-0.353	-1.04	-2.88	-0.0304										-2.14	-2.54	0.825	-1.33	-1.69	-0.401	-2.53	-0.664	-0.843	-1.42	-2.82	-1.47
-2.06	-0.629	-1.14	-2.99	-0.606										-2.15	-2.49	1.76	-1.01	-2.87	-0.224	-2.93	-0.453	-0.804	-1.26	-3.19	-1.71
-1.93	0.195	-1.14	-3.4	-0.804										-2.28	-2.17	0.804	-1.2	-2.39	0.259	-1.39	-0.552	-0.629	-1.07	-2.62	-2.3
-2.74	-0.497	-1.08	-3.12	-0.45										-2.33	-2.4	0.875	-1.18	-2.03	0.256	-2.29	-0.844	-0.318	-1.21	-2.75	-2.09
-3.24	0.502	-1.04	-3.43	-1.32										-2.29	-2.49	1.29	-1	-1.8	0.556	-3.28	-0.868	-0.97	-1.12	-2.88	-1.28
-1.41	-0.436	-1.34	-2.61	-1.63										-1.89	-1.77	1.11	-0.977	-0.904	1.28	-2.75	-0.844	-0.876	-1.41	-2.96	-0.772
-1.46	-0.598	-1.45	-2.67	-0.826										-2.62	-2.31	1.2	-0.801	-2.29	0.422	-2.63	-0.988	-0.623	-1.45	-2.82	-1.47
-1.93	-1.49	-1.17	-3.01	-1.32										-2.69	-2.09	1.01	-1.3	-1.76	-0.144	-1.95	-0.971	-0.327	-1.34	-2.84	-1.64
-1.71	-0.23	-0.959	-2.5	-0.827										-3.15	-2.02	0.478	-0.913	-2.8	-0.592	-1.64	-1.08	-0.193	-1.39	-3.24	-1.63
-2.11	-0.904	-0.773	-3.04	0.571										-1.95	-2.46	0.629	-0.637	-3.03	-0.386	-2.2	-1.03	-0.933	-1.51	-2.76	-1.67
-2.72	-0.315	-0.717	-2.75	-0.105										-2.52	-1.87	1.28	-0.978	-3.07	-0.124	-3.21	-1.2	-0.581	-1.42	-2.96	-1.13
-2.03	-1.28	-1.03	-2.63	0.438										-2.29	-1.92	0.654	-0.778	-2.52	0.281	-3.8	-1.16	-0.624	-1.6	-3.39	-1.07
-2.35	0.195	-0.747	-2.56	0.258										-2.59	-1.63	0.662	-0.971	-1.86	0.233	-2.87	-1.07	-0.56	-1.94	-2.92	-1.15
-1.58	-0.646	-0.944	-2.95	-0.6										-2.51	-1.78	-0.0387	-0.325	-1.62	-0.307	-1.76	-1.35	-0.845	-1.81	-3.03	-1.16
-1.99	-1.87	-1.29	-1.93	-1.05										-2.73	-1.59	0.0847	-0.49	-0.806	0.2	-3.51	-1.33	-0.73	-1.97	-2.88	-1.72
-1.82	-0.217	-0.922	-3.13	-1.37										-2.51	-1.89	-0.646	-0.609	-1.81	0.0396	-3.57	-1.58	-0.431	-1.75	-3.28	-1.67
-2.21	0.59	-1.45	-3.21	-1.28										-2.91	-2.34	-0.128	-1.06	-2.34	-0.0186	-3.17	-1.64	-0.638	-2.01	-3.09	-2.46
-2.13	-0.413	-1.26	-2.99	-1.06										-2.87	-1.68	0.815	-1.57	-2.67	-1.21	-2.7	-1.53	-0.419	-1.87	-2.7	-2.16
-2.39	-0.583	-1.1	-2.67	0.0964										-2.41	-2.46	0.375	-0.747	-2.05	-1.02	-2.98	-1.39	-0.513	-1.78	-2.96	-2.01
-1.87	0.527	-1.81	-2.4	0.698										-2.76	-2.45	0.424	-0.88	-1.48	-0.493	-1.79	-1.44	-0.911	-1.83	-3.25	-2.34
-2.57	-0.325	-1.53	-2.65	-0.198										-2.25	-2.49	0.661	-1.05	-1.02	-0.434	-1.78	-1.45	-0.903	-2.15	-3.23	-2.22
-1.79	0.618	-1.5	-2.65	0.266										-1.95	-2.42	0.742	-1.31	-1.89	-0.365	-1.78	-1.61	-1.15	-1.93	-3.38	-1.98
-3.25	0.466	-0.992	-2.28	0.15										-2.66	-2.16	0.115	-1.28	-1.42	0.0415	-2.1	-1.26	-0.917	-1.86	-3.18	-1.88
-2.34	-1.28	-1.58	-2.89	-0.206										-2.93	-1.97	0.428	-0.447	-2.1	-0.0944	-2.2	-0.976	-1.18	-1.63	-3.32	-2.31
-2.37	0.0409	-1.13	-2.54	0.351										-2.08	-2.49	-0.0332	-0.766	-2.16	-0.0169	-2.2	-1.16	-0.994	-1.81	-2.89	-1.87
-2.01	-0.556	-0.852	-2.42	-0.0014										-2.19	-2.75	0.972	-1.06	-2.47	-0.359	-2.78	-1.37	-1.09	-1.76	-2.14	-1.66
-1.66	0.494	-0.692	-2.6	-1.86										-2.76	-2.42	0.829	-0.406	-1.69	0.403	-2.33	-1.25	-0.684	-1.84	-2.16	-2.12
-2.47	0.495	-0.814	-2.65	0.173										-2.72	-2.27	-0.0364	-0.643	-1.66	0.566	-1.33	-1.19	-0.675	-1.69	-1.9	-2.49
-2.58	-1.3	-0.757	-2.84	-0.414										-2.62	-2.69	0.587	-0.917	-2.24	0.193	-1.55	-1.42	-0.632	-1.51	-2.18	-2.01
-2.19	-1.39	-1.08	-2.46	0.0881										-2.06	-2.91	-0.129	-0.759	-1.3	0.195	-1.69	-1.43	-0.643	-1.48	-1.95	-1.84
-1.94	0.438	-1.36	-2.52	-0.2										-2.55	-3	-0.033	-0.849	-1.96	0.722	-1.29	-1.44	-0.649	-1.59	-2.13	-2.03
-2.56	-1.04	-1.1	-2.56	-0.171										-2.54	-2.99	-0.617	-1.29	-2.13	0.422	-2.07	-1.39	-1.17	-1.77	-2.1	-2.23
-2.21	-0.148	-1.68	-2.46	-0.642										-2.51	-2.76	-0.356	-0.991	-1.69	0.364	-1.79	-1.39	-1.24	-1.81	-2.31	-2.28
-1.88	0.831	-1.69	-3.42	-0.109										-2.04	-2.86	0.176	-1.07	-2.12	-0.675	-2.97	-1.24	-1.25	-1.5	-2.66	-2.29
-2.32	1.18	-1.3	-3.09	1.24										-2.1	-3.32	0.0837	-1.52	-2.3	-0.38	-2.6	-1.41	-0.883	-1.95	-2.64	-2.49
-1.93	-0.634	-1.6	-3.34	-0.219										-2.78	-2.95	-1.38	-1.33	-2.53	-0.497	-2.77	-1.51	-0.974	-1.76	-2.75	-2.37
-2.42	-1.46	-1.71	-3.51	0.43										-2.53	-2.56	-0.661	-1.55	-2.02	-0.216	-2.71	-1.47	-1.03	-1.55	-2.84	-2.6
-1.67	-1.39	-1.45	-2.83	0.434										-2.43	-2.12	-0.999	-1.18	-1.73	-0.801	-2.5	-1.44	-1.29	-1.63	-2.49	-2.58
-2.02	0.0439	-1.98	-2.39	0.686										-2.64	-2.56	-1.8	-0.893	-1.93	-0.534	-2.23	-1.52	-1.05	-1.76	-2.58	-2.61
-2.05	-1.03	-1.42	-2.37	-0.689										-3	-2.16	-1.07	-1.51	-3.04	0.0997	-3.79	-1.54	-0.661	-1.74	-2.62	-2.26
-0.977	0.333	-1.15	-2.49	0.981										-2.67	-1.95	-1.07	-1.37	-1.74	0.31	-1.99	-1.48	-0.701	-1.91	-3.14	-2.07
0.17	-0.832	-1.07	-2.61	-0.374										-2.92	-2.57	-1.33	-1.36	-1.32	0.417	-1.87	-1.64	-0.868	-1.61	-2.77	-2.22
-0.619	-0.722	-1.26	-2.83	-0.0373										-3.02	-2.81	-1.08	-1.37	-1.73	0.0272	-2.41	-1.67	-1.04	-2.12	-2.69	-1.68
-1.17	-1.09	-1.45	-3.12	-1.93										-2.5	-2.6	-1.6	-1.1	-2.32	-0.148	-2.43	-1.69	-1.35	-1.75	-2.33	-1.71
-0.575	-0.334	-0.915	-3.18	0.105										-3.22	-2.52	-1.06	-1.08	-1.44	0.438	-2.41	-1.78	-0.923	-1.94	-2.42	-1.38
-0.254	-0.588	-0.792	-2.81	0.545										-2.41	-2.64	-0.621	-1.76	-2.74	0.125	-2.31	-1.45	-1.01	-1.86	-2.82	-2.08
-1.01	-0.874	-0.373	-2.95	-0.326										-2.07	-2.76	0.526	-1.48	-1.62	0.033	-3.04	-1.2	-1.37	-1.94	-2.83	-2.42
-2	-0.723	-0.602	-2.62	0.0964										-1.97	-3.01	-0.883	-1.87	-1.67	-0.411	-3.39	-1.43	-0.575	-1.54	-3.23	-1.77
-1.92	-0.492	-0.339	-2.62	0.051										-2.65	-2.35	-0.789	-1.44	-2.5	-0.659	-2.69	-1.23	0.505	-1.9	-2.71	-2.84
-0.95	-0.0287	-0.521	-3.18	0.0697										-1.97	-2.39	-0.613	-1.54	-3.08	-0.0555	-2.36	-1.23	1.32	-1.7	-2.64	-3.19
-1.32	-0.284	-0.612	-2.94	-1.18										-2.27	-2.08	-1.79	-1.54	-3.18	0.838	-2.07	-1.51	2.01	-1.34	-2.62	-2.13
-0.894	-1.12	-0.544	-2.74	-0.618										-2.91	-2.5	-1.7	-1.81	-2.42	-0.0769	-0.797	-1.69	1.6	-0.448	-2.34	-0.722
-0.996	-1.04	-1.02	-2.44	-0.204										-2.5	-2.55	-1.63	-1.17	-2.84	-0.363	-0.417	-1.47	1.41	-0.691	-1.39	-1.52
-1.97	0.132	-1.47	-3.33	-0.59										-2.47	-3.06	-1.61	-1.45	-2.8	-0.322	-2.5	-1.72	1.28	-0.912	-1.25	-1.43
-1.51	0.679	-1.65	-3.18	-1.63										-2.78	-3.22	-1.03	-1.87	-2.37	-0.382	-2.43	-1.57	0.98	-0.935	-1.58	-1.84
-1.2	-0.739	-1.45	-2.68	-0.035										-3.28	-1.81	-1.67	-1.66	-2.87	-0.317	-2.2	-1.55	0.866	-0.718	-1.11	-1.9
-1.97	-0.344	-1.45	-3.06	-0.171										-2.54	-2.31	-1.86	-1.48	-2.71	-0.225	-2.42	-1.58	0.68	-1.11	-1.09	-1.61
-0.843	0.463	-1.41	-3.36	-0.287										-2.67	-2.42	-1.56	-1.43	-2.23	-0.889	-1.47	-1.56	0.838	-1.05	-0.969	-0.229
-1.23	-0.407	-1.54	-3.28	-1.24										-2.44	-2.08	-1.79	-1.25	-2.2	-0.189	-1.61	-1.48	0.844	-1.13	-1.15	-0.562
-0.904	-1.14	-1.47	-3.88	-0.00336										-2.36	-2.38	-1.97	-0.819	-2.14	-0.136	-2.29	-1.48	1.06	-1.24	-1.47	-0.418
-2.18	-1.32	-1.49	-3.63	0.0956										-2.58	-3.52	-2.03	-0.825	-1.24	-0.0855	-1.81	-1.69	0.495	-1.37	-1.73	-0.204
-1.04	-0.673	-1.79	-2.84	-0.383										-2.79	-2.55	-1.24	-0.717	-0.895	-0.613	-1.35	-1.41	0.515	-1.27	-1.44	-0.475
-0.886	-0.527	-1.99	-3.51	-0.0735										-3.3	-2.44	-1.21	-0.501	-1.22	0.0211	-1.57	-1.41	0.42	-1.32	-1.64	-0.691
-1.91	-0.812	-1.52	-3.76	-1.76										-3.15	-2.29	-1.13	-0.409	-1.61	-0.298	-1.36	-1.53	0.566	-1.23	-1.32	-0.914
-0.809	-1.84	-1.26	-2.65	-1.19										-2.53	-2.1	-1.76	-0.91	-0.946	-0.15	-2.03	-1.5	0.431	-1.41	-1.23	-1.09
-0.969	-0.932	-1.4	-2.89	-0.253										-2.56	-1.73	-2.25	-0.95	-0.887	0.433	-2.25	-1.33	0.599	-1.25	-1.21	-1.13
-0.979	-0.205	-1.4	-2.7	-1.5										-2.84	-1.83	-1.88	-1.22	0.483	-0.331	-3.36	-1.5	0.557	-1.34	-1.45	-0.537
-1.01	0.546	-1.73	-3.14	-0.364										-2.79	-1.94	-1.99	-1.46	-0.808	-0.139	-2.29	-1.6	0.195	-1.32	-2	-1.82
-1.63	-0.298	-1.72	-3.06	-0.184										-3.1	-2.07	-2.1	-0.483	-0.83	-0.0259	-2.44	-1.46	0.18	-1.2	-2.05	-1.56
-0.917	-0.936	-1.86	-2.84	-1.7										-3.1	-1.77	-1.69	-0.776	0.104	-0.304	-1.53	-1.47	0.528	-1.19	-2.16	-0.767
-0.508	-0.228	-1.24	-2.82	-0.883										-2.98	-2	-1.47	-0.972	0.0303	-0.409	-1.38	-1.5	0.125	-0.802	-2.01	-0.743
-1.47	-1.11	-1.49	-3.19	-0.518										-3.4	-2.12	-1.8	-0.891	-0.878	-0.282	-1.94	-1.34	0.386	0.373	-2.46	-0.808
-0.979	0.118	-1.24	-2.74	0.536										-2.85	-2.69	-1.86	-0.874	-0.325	0.341	-0.707	-1.49	0.297	0.322	-2.13	-1.16
-0.778	-1.11	-1.23	-3.75	1.25										-3.24	-2.41	-1.45	-0.677	-0.397	0.524	-3.04	-1.58	0.13	0.0816	-1.9	0.486
-1.63	-0.687	-1.17	-3.39	-0.148										-2.83	-1.97	-0.737	-0.838	-0.693	-0.0287	-2.98	-1.54	0.0561	-0.0223	-1.71	-0.349
-0.543	-0.654	-1.15	-2.91	0.0254										-2.72	-1.62	-1.17	-0.804	-1.28	-0.319	-2.33	-1.5	-0.411	0.0147	-1.71	-0.808
-1.4	0.977	-1.26	-3.96	-1.09										-2.47	-1.96	-1.04	-0.616	-0.338	-0.23	-2.16	-1.7	-0.548	0.352	-1.72	-1.1
-1.92	-1.67	-1.55	-3.84	-1.54										-2.93	-2.42	0.153	-0.914	-1.14	0.106	-1.74	-1.63	-0.704	0.22	-2.24	-1.73
-2.4	-0.298	-1.62	-3.78	0.501										-3.63	-2.27	-0.958	-0.86	-1.48	0.937	-2.27	-1.58	-0.621	0.187	-2.28	-1.14
-1.76	-0.341	-1.57	-3.11	-0.308										-3.19	-2.14	-0.963	-0.844	-2.36	1.52	-1.61	-1.31	-0.893	0.225	-2.37	-1.49
-1.37	0.115	-1.07	-3.55	-0.495										-3.05	-2.03	-0.631	-0.821	-2.03	0.879	-1.66	-1.32	-0.745	0.182	-2.4	-1.36
-2.36	-1.26	-0.986	-3.87	0.213										-2.94	-2.04	-0.849	-1.02	-2.63	0.346	-3.64	-1.26	-1.01	-0.28	-2.23	-1.46
-3.09	0.679	-1	-2.85	-0.448										-2.47	-2.05	-0.793	-0.392	-2.78	0.625	-2.26	-1.26	-0.77	-0.437	-2.26	-1.16
-2.52	-0.692	-0.817	-3.15	-0.0066										-2.42	-1.72	-1.17	-0.476	-1.36	-0.733	-3.01	-1.09	-1.08	-0.164	-2.23	-1.68
-2.14	-0.643	-1.19	-3.07	0.882										-1.98	-2.79	-1.46	-0.824	-1.49	-0.157	-1.54	-1.26	-1.22	-0.0202	-2.32	-1.18
-3	-0.646	-0.517	-3.61	0.268										-3.05	-2.36	-1.14	-1.19	-0.288	-0.626	-1.76	-1.38	-1.27	-0.248	-2.56	-1.69
-2.68	0.0528	-0.584	-2.95	-0.347										-3.55	-2.23	-2.01	-1.4	-0.919	-0.635	-2.27	-1.54	-0.938	-0.405	-2.46	-1.49
-1.58	-0.998	-0.351	-2.98	0.139										-3.64	-2.09	-1.95	-1.07	-1.3	-0.661	-3.5	-1.53	-0.922	-0.513	-2.62	-1.84
-2.07	-0.482	-0.972	-3.27	0.371										-3.86	-2.14	-2.48	-0.105	-1.95	-0.394	-3.35	-1.19	-0.658	-0.481	-2.41	-1.48
-1.84	-0.773	-0.751	-3.2	0.686										-3.37	-2.11	-2.71	-0.508	-1.81	-0.186	-2.42	-1.52	-1.02	-0.789	-2.04	-1.61
-1.35	0.899	-0.748	-3.2	1.54										-3.53	-2.4	-2.39	-0.652	-3.04	0.359	-2.85	-1.67	-0.795	-0.896	-2.58	-1.6
-1.95	-0.832	-0.996	-2.76	0.374										-3.62	-2.87	-2.27	-0.355	-2.45	0.323	-2.68	-1.6	-0.891	-0.894	-2.51	-1.09
-2.27	-0.147	-0.908	-2.72	-0.245										-2.52	-3.13	-2.55	-0.342	-3.09	0.179	-1.65	-1.46	-0.603	-0.942	-2.44	-1.53
-1.68	-0.528	-0.789	-3.18	0.571										-2.68	-3.23	-3.22	-0.31	-0.824	0.314	-1.64	-1.64	-0.782	-0.693	-2.71	-1.67
-1.61	-1.5	-0.704	-3.42	0.29										-3.38	-2.28	-3.18	-0.925	-0.0864	0.288	-1.23	-1.2	-0.641	-0.613	-2.66	-1.65
-3.08	-0.00171	-0.685	-2.94	-0.146										-3.07	-2.42	-2.04	-0.49	-0.42	0.428	-2.5	-1.62	-0.906	-0.54	-2.42	-1.81
-3.33	-0.439	-0.232	-3.17	-0.566										-2.99	-2.3	-1.8	-0.505	-0.528	0.296	-1.53	-1.73	-0.97	-0.867	-2.41	-1.78
-2.74	-0.824	-0.717	-3.49	-0.0705										-3.04	-3.07	-1.43	-0.865	0.0125	0.0734	-2.27	-2.03	-1.35	-0.68	-2.37	-1.67
-1.84	-0.674	-0.88	-3.48	-0.702										-2.45	-2.44	-1.47	-0.853	-1.05	0.264	-2.19	-1.98	-0.592	-0.966	-2.11	-1.01
-2.13	0.249	-1.51	-3.58	-0.543										-2.89	-2.82	-2.26	-0.628	-0.774	0.596	-1.48	-1.75	-0.891	-0.959	-2.11	-1.28
-0.704	-2.17	-1.18	-3.45	-0.63										-2.81	-2.38	-2.11	-0.936	-1.18	0.815	-1.41	-1.56	-0.73	-0.854	-2.52	-1.36
-1.33	0.0374	-1.48	-3.76	-1.47										-2.92	-2.5	-2.35	-0.7	-1.79	-0.229	-1.44	-1.92	-0.973	-0.852	-2.32	-1.28
-0.955	-0.992	-1.13	-3.25	-1.2										-2.95	-3.07	-1.45	-0.73	-1.88	0.285	-3.4	-1.72	-1.01	-1.12	-2.19	-1.55
-1.28	-0.777	-0.815	-3.27	-0.312										-2.4	-3.15	-2.42	-0.857	-2.27	0.279	-3.07	-1.57	-0.759	-1.04	-1.87	-1.77
-2.16	-0.582	-1.25	-3.33	-0.718										-2.76	-2.01	-2.45	-1.01	-1.09	0.141	-2.19	-1.09	-0.923	-1.17	-1.88	-1.71
-2.05	-0.987	-0.993	-2.99	0.0294										-3.09	-2.19	-2.47	-0.808	-0.443	-0.0395	-2.15	-1	-0.702	-0.544	-1.91	-1.68
-3.14	-1.73	-0.709	-3.16	-0.751										-3.45	-2.7	-2.51	-1.08	-0.269	-0.244	-1.62	-1.08	-1.02	-0.58	-2.22	-1.75
-1.67	-2.73	-0.682	-3.09	-0.597										-3.14	-2.85	-2.66	-0.819	-0.427	0.0695	-1.76	-1.22	-0.89	-0.519	-2.17	-1.95
-2.3	-0.181	-0.532	-3.32	0.068										-3.05	-2.56	-2.05	-1.02	-1.75	-0.147	-2.5	-1.17	-0.807	-0.497	-2.2	-2.14
-3.23	-1.77	-0.641	-3.61	-0.105										-3.01	-2.69	-1.94	-1.08	-1.34	-0.299	-2.04	-1.1	-0.925	-0.504	-2.46	-2.09
-2.65	-0.824	-0.487	-3.31	0.573										-3.1	-3.18	-1.6	-0.967	-1.48	-0.23	-2.41	-1.17	-1.01	-1.04	-2.36	-2.12
-2.27	-0.663	-0.951	-3.28	0.115										-1.72	-2.69	-1.75	-0.584	-0.973	0.0911	-1.5	-1.09	-0.913	-0.575	-2.11	-1.53
-1.6	-0.265	-0.455	-3.33	-0.0177										-1.33	-2.55	-2.27	-0.762	-1.11	0.0421	-2.32	-1.28	-0.814	-0.997	-2.37	-1.19
-2.14	-1.2	0.0202	-3.12	-0.145										-1.6	-1.89	-2.27	-0.95	-0.737	-0.114	-2.95	-0.835	-1.15	-0.727	-2.02	-1.28
-2.51	-0.482	-0.231	-3.5	-1.22										-1.73	-2.22	-3.13	-0.489	-0.707	0.0251	-1.9	-0.804	-1.18	-1.01	-1.75	-1.39
-2.44	-0.531	-0.166	-3.52	-0.378										-1.88	-2.25	-2.02	0.0997	-0.467	-1.36	-2.07	-0.746	-1.15	-0.714	-1.95	-1.47
-2.89	-0.207	-0.606	-3.09	-1.39										-1.85	-3.27	-2.08	0.114	-1.51	-1.51	-1.36	-0.772	-1.83	-0.81	-1.67	-1.49
-3.6	-1.95	-0.262	-2.88	-0.0159										-1.93	-2.4	-1.92	-0.15	-1.78	-1.44	-1.28	-0.708	-1.71	-0.712	-0.564	-2
-3.27	-0.603	-0.525	-2.77	-0.645										-2.04	-3.35	-2.44	-0.285	-1.57	-1.85	-2.17	-0.727	-1.9	-1.06	-0.319	-1.19
-2.95	-2	-0.335	-3.1	-0.989										-2.39	-2.92	-2.07	-0.116	-1.05	-1.46	-1.07	-0.957	-1.5	-0.845	-0.607	-2.54
-2.5	0.0608	-0.446	-2.92	1.39										-1.79	-3.53	-2.09	-0.222	-0.597	-1.02	-1.38	-1.02	-1.63	-0.906	-0.594	-1.98
-2.25	-1.33	-0.739	-3.13	-0.0152										-2.43	-3.63	-2.65	-0.472	-0.432	-0.966	-1.18	-0.907	-1.48	-0.827	-0.796	-2.6
-1.18	-1.18	-0.662	-2.89	-0.0761										-2.41	-3.37	-1.89	-0.643	-0.386	-0.964	-1.69	-0.783	-0.677	-1.13	-0.854	-2
-1.78	-0.299	-0.62	-3.35	-0.164										-2.17	-2.35	-1.75	-1.08	-1.23	-0.0342	-2.41	-0.925	-1.18	-1.13	-1.03	-1.94
-1.58	-1.77	-0.431	-2.03	-1.24										-1.98	-2.59	-2.43	-0.86	-1.43	-0.265	-0.604	-0.95	-1.05	-0.954	-1.07	-2.27
-1.66	-1.8	-0.159	-2.73	-0.342										-1.81	-2.14	-2.11	-0.888	-0.192	-0.11	-1.72	-0.981	-1.11	-1.12	-0.981	-2.26
-1.95	-1.47	-0.154	-2.95	-0.428										-2.11	-2.11	-1.93	-0.955	-0.666	-0.666	-0.799	-1.12	-0.874	-1.15	-0.895	-2.88
-1.32	0.116	-0.244	-2.96	-0.276										-2.12	-2.59	-2.4	-0.946	-0.893	-0.892	-1.91	-1.29	-0.882	-1.01	-0.8	-2.33
-1.38	-1.56	-0.137	-3.3	0.324										-2.38	-2.58	-1.56	-0.645	-0.83	-1.28	-2.06	-1.34	-0.601	-1.36	-0.849	-2.86
-1.34	0.374	-0.296	-2.67	0.514										-2.84	-2.35	-2.16	-0.533	-1.16	-0.545	-1.68	-1.3	-1.12	-1.05	-0.87	-3.13
-1.48	-0.0889	-0.0818	-3.08	-1.14										-2.93	-1.75	-2.23	-0.463	-0.782	-0.577	-2	-1.23	-0.664	-0.789	-1.09	-3.01
-2.78	0.278	0.123	-3.13	0.247										-3.02	-1.58	-2.12	-0.543	-1.1	-0.293	-1.66	-0.677	-0.523	-1.31	-1.2	-2.69
-1.68	-0.257	-0.321	-3	-0.986										-2.97	-2.09	-1.87	-0.612	-0.949	-0.404	-1.84	-0.736	-0.945	-1.18	-1.34	-2.8
-2.89	-1.15	0.244	-3.49	-1.27										-2.28	-2.04	-1.96	-0.512	-0.622	-0.477	-1.79	-0.651	-0.391	-1.41	-1.06	-2.56
-2.83	-0.834	-0.89	-3.35	-2.41										-2.04	-1.87	-1.86	-0.185	-0.173	-0.814	-1.95	-0.575	-1.12	-1.39	-1.48	-2.47
-2.7	0.226	-0.694	-3.57	-1.32										-2.24	-2.25	-2.52	-0.587	-0.498	-0.0197	-0.718	-0.17	-0.946	-1.51	-1.87	-2.74
-1.86	-0.505	-0.715	-3.34	-0.733										-2.51	-2.63	-2.12	-1.1	-0.292	0.227	-0.797	-0.426	-0.918	-1.35	-1.29	-2.83
-1.94	-0.568	-0.595	-3.27	-0.93										-2.67	-2.3	-3.42	-0.858	-1.27	-0.353	-1.2	-0.561	-0.989	-1.41	-1.82	-2.33
-2.53	1.11	-0.614	-3.21	-0.419										-2.66	-2.25	-2.92	-0.797	-1.5	0.0418	-1.21	-0.535	-1.07	-1.57	-1.7	-2.62
-1.61	-0.387	-0.223	-2.94	-1.38										-2.73	-2.66	-3.09	-1.59	-1.75	-0.607	-1.93	-0.361	-1.34	-1.76	-1.78	-2.3
-2.36	-0.696	-0.14	-3.71	-2.01										-2.46	-2.92	-2.91	-1.46	-1.06	-0.00787	-0.565	-0.494	-0.849	-1.73	-1.86	-2.3
-2.6	-0.177	0.0788	-2.94	-2.38										-2.14	-3.17	-2.29	-1.73	-1.3	0.242	-2.16	-0.323	-0.976	-1.46	-2.22	-2.46
-2.96	-0.642	-0.00318	-3.23	-1.24										-1.64	-3	-3.49	-1.76	-0.608	0.504	-2.66	-0.662	-1.09	-1.36	-1.93	-2.19
-2.94	1.06	0.499	-3.22	-1.69										-1.89	-2.82	-3.04	-1.62	-1.22	0.215	-3.18	-0.554	-0.976	-1.42	-1.98	-2.59
-3.23	-0.867	0.535	-3.56	-1.47										-1.78	-2.97	-3.14	-1.37	-1.23	0.462	-2.61	-0.519	-1.12	-1.15	-2.01	-2.4
-3	-0.539	0.637	-3.28	-0.862										-1.97	-2.43	-3.16	-1.22	-0.596	-0.46	-3.45	-0.374	-1.12	-1.27	-1.89	-2.45
-2.21	0.425	1.24	-3.82	-0.16										-2.47	-2.59	-3.34	-1.01	-1.29	-0.747	-2.1	-0.24	-1.42	-1.25	-2.12	-2.98
-0.992	-1.32	1.26	-3.47	-1.53										-2.67	-2.67	-1.39	-0.168	-0.954	-0.603	-2.8	-0.577	-1.35	-1.52	-2.06	-2.65
-2.15	-0.0509	1.82	-3.25	-1.79										-2.77	-2.03	-2.39	0.584	-1.11	-0.812	-2.03	-0.597	-1.34	-1.64	-1.93	-2.65
-2.55	-0.217	1.49	-3.48	-0.683										-2.78	-1.58	-2.54	-0.373	-0.645	-0.299	-2.62	-0.787	-1.4	-1.9	-2.23	-2.35
-4.01	0.0772	1.4	-3.52	-0.557										-1.9	-1.62	-2.2	-0.468	-2.14	-0.18	-2.66	-0.867	-1.62	-1.82	-1.88	-1.99
-3.84	-1.44	0.971	-3.49	-0.593										-2.38	-2.05	-2.57	-0.598	-2.89	-0.15	-1.27	-1.09	-1.52	-1.64	-1.82	-2.83
-2.44	0.0151	0.83	-3.48	-0.404										-2.07	-2.55	-2.59	-0.609	-2.27	0.464	-2.19	-0.973	-1.41	-1.67	-1.64	-2.18
-2.81	-0.574	0.861	-3.54	0.384										-2.52	-1.99	-0.943	-1.21	-1.51	0.0922	-1.94	-0.914	-1.25	-1.81	-1.85	-2.41
-2.57	-0.00433	0.73	-3.72	0.262										-2.46	-1.49	-2.12	-0.78	-1.19	0.557	-2.26	-0.899	-1.53	-2	-2.11	-2.16
-2.6	3.19	0.83	-3.59	-1.26										-2.41	-1.37	-3.05	-0.0286	-1.26	0.533	-2.48	-0.76	-1.33	-1.97	-2.21	-2.03
-2.75	0.301	0.85	-3.81	-1.4										-2.44	-1.43	-2.48	-0.304	-1.65	-0.197	-3.23	-0.572	-1.05	-1.94	-2.15	-2.83
-2.22	-0.0493	1.1	-3.62	-2.39										-2.24	-1.34	-1.99	-0.84	-1.7	0.148	-2.51	-0.2	-0.377	-2.07	-2.18	-1.89
-2.29	-0.77	0.656	-3.18	0.029										-2.28	-1.93	-2.37	-0.987	-1.52	-0.14	-1.25	-0.435	-0.358	-2.19	-2.36	-2.17
-3.88	-0.341	1.51	-3.91	-1.01										-2.2	-1.9	-2.51	-0.632	-2.08	0.4	-1.46	-0.409	-0.846	-2.32	-1.61	-2.48
-3.25	-0.851	1.72	-3.39	0.11										-2.18	-2.08	-2.57	-0.265	-1.91	0.471	-1.19	-0.556	-0.828	-2.1	-1.19	-3.11
-3.3	-0.765	1.59	-3.97	-0.97										-2.74	-1.72	-2.13	-0.626	-2.08	0.331	-2.65	-0.557	-0.725	-1.81	-1.44	-2.87
-3.18	0.641	1.28	-3.52	0.000178										-2.32	-1.91	-2.54	-0.539	-1.83	0.868	-2.53	-0.629	-0.832	-1.99	-1.46	-2.53
