# Supplementary material for: Metabolic sensing in AgRP neurons integrates homeostatic state with dopamine signalling in the striatum
Source: eLife journal article supplement (doi:10.7554/elife.72668), 2022-01-12
Supplement: fig1-figsupp1-data1 [file FigS1G.xlsx]

## Sheet: Sheet1
WT	KO
23.2	19.604
30.099	19.532
37.4024	23.6
40.307	49.899
27.5	29.206
9.85
