# Supplementary material for: Metabolic sensing in AgRP neurons integrates homeostatic state with dopamine signalling in the striatum
Source: eLife journal article supplement (doi:10.7554/elife.72668), 2022-01-12
Supplement: fig1-figsupp1-data1 [file FigS1H.xlsx]

## Sheet: Sheet1
WT	KO
30.407	22.899
20.001	29.36
24.2023	25.299
16.314	19.8
20.797	16.694
20.2992	18.899
18.401	41.901
30.7046	15.9048
15.005	7.499
30.052	11.3011
27.9	12.8
26.8	10
25.695
19.7
