# Supplementary material for: Metabolic sensing in AgRP neurons integrates homeostatic state with dopamine signalling in the striatum
Source: eLife journal article supplement (doi:10.7554/elife.72668), 2022-01-12
Supplement: fig1-figsupp1-data1 [file FigS1I.xlsx]

## Sheet: Sheet1
WT	KO
36.1996	20.105
14.695	21.403
41.2948	15.902
23.4033	11.099
16.0018	13.099
14.197	18.906
21.006	19.2
15
