# Supplementary material for: Metabolic sensing in AgRP neurons integrates homeostatic state with dopamine signalling in the striatum
Source: eLife journal article supplement (doi:10.7554/elife.72668), 2022-01-12
Supplement: fig1-figsupp1-data1 [file FigS1K.xlsx]

## Sheet: Sheet1
KO fed					KO fast
0.794	-0.0857	1.46	-1.12		1.63	0.928	0.466	-0.28	0.319
0.629	-0.258	-0.604	-0.691		2.28	0.503	0.531	0.357	-0.937
0.642	-0.894	0.125	-0.719		1.54	0.398	0.858	0.979	-0.301
0.271	-0.925	-0.477	0.0699		1.97	0.7	1.18	0.673	-0.697
1.15	-1.14	-0.457	-0.131		1.61	0.766	-0.451	0.999	-0.85
1.11	-1.27	-0.443	-0.26		1.37	0.911	-0.795	0.412	-0.426
0.594	-1.16	-0.00888	0.924		1.68	0.762	-0.358	0.475	1.48
0.607	-1.31	-0.437	1.22		0.943	-0.12	-0.195	0.484	0.481
0.338	-1.3	-0.66	1.26		0.862	-0.126	0.177	0.644	-0.385
-0.696	-1.11	-1.5	0.14		0.989	0.0728	0.397	-0.145	-0.511
-0.217	-1.45	-1.7	0.65		0.636	-0.225	1.41	-0.533	0.821
0.55	-1.11	-0.86	-0.111		1.31	0.0268	1.97	0.0438	-0.532
0.675	-1.45	-0.478	-0.889		1.21	0.489	1.37	1.21	0.991
1.55	-0.99	-0.627	-0.977		0.592	0.204	0.589	0.755	-0.405
1.22	-0.764	-0.787	-0.362		0.895	0.301	-1.15	-0.104	0.429
0.538	-0.791	-0.654	-0.851		0.755	-0.0411	1.57	0.488	1.32
-0.207	-0.583	-1.23	-0.96		0.641	0.118	0.288	0.839	0.344
0.346	-0.698	-1.42	-0.475		0.236	-0.331	1.09	1.13	0.544
0.758	-0.279	-0.0507	-0.324		0.576	-0.166	-0.31	1.33	-1.01
0.532	-0.0588	1	0.145		0.763	-0.52	0.113	1.56	-1.11
-0.415	-0.192	1.13	-0.137		0.541	0.057	-1.15	1.53	-1.63
-0.496	0.0648	1.59	-0.508		1.17	0.00923	-1.72	0.999	-0.254
-0.0992	0.131	0.957	0.652		0.467	-0.469	-0.112	1.18	-0.884
-0.843	-0.0737	0.224	1.01		0.162	-0.603	0.154	1.07	-0.475
-0.952	-0.316	0.297	0.845		0.263	-0.544	0.731	1.42	-0.793
-0.33	-0.234	0.171	0.65		0.266	-0.112	0.674	1.17	-0.254
-0.264	-0.0795	-0.324	-0.244		0.549	-0.528	-1.32	1.13	-1.08
-0.194	-0.495	0.547	0.273		0.823	-0.433	-1.44	0.456	0.0912
0.138	-0.866	0.565	0.275		0.859	-0.0106	-1.1	0.689	0.918
0.237	-0.572	0.675	-0.16		0.878	-0.234	-0.681	0.265	-0.176
0.468	-0.469	0.567	-0.291		0.78	-0.13	-1.28	-0.191	0.717
0.0242	-0.567	0.512	-0.354		0.774	-0.632	-0.36	0.0759	-0.383
0.221	-0.682	0.127	0.219		0.119	-0.182	-1.37	0.275	0.0625
0.612	-0.927	-0.271	-0.3		0.336	-0.797	-1.52	0.3	-0.0431
0.266	-0.793	-0.113	0.273		0.107	-0.839	-1.9	0.0976	-0.353
0.947	-0.507	-0.169	-0.197		0.549	-0.287	-1.43	-0.495	0.445
0.414	-1.04	0.279	0.584		0.854	-0.659	-0.149	-0.773	0.543
0.197	-1.55	0.738	0.59		1.22	0.483	-0.901	-0.226	0.594
-0.0441	-1.96	0.551	0.261		1.42	-0.697	0.33	-0.612	-0.256
0.723	-1.71	-0.595	-0.0568		0.904	0.0846	-0.262	-1.17	-0.552
-0.615	-2.18	-0.903	0.303		0.19	-0.984	0.583	-0.22	0.53
0.153	-1.78	-0.582	0.548		0.235	-0.524	-0.399	0.256	1.48
-0.194	-1.69	-0.862	0.577		0.229	-0.628	-0.744	1.21	0.593
0.255	-1.71	0.224	-0.478		0.325	-0.032	-1.06	0.842	0.645
0.324	-1.86	0.409	-0.681		-0.509	-0.282	-1.61	0.648	0.318
0.862	-1.94	1.15	0.136		-0.302	-0.276	-0.973	-0.147	0.882
-0.0613	-1.72	0.153	-0.126		0.123	-0.72	-0.266	0.814	-0.151
-0.53	-1.51	0.22	0.138		0.216	-0.205	0.179	-0.0485	-0.154
-0.855	-1.65	-0.00633	-0.427		0.795	-1.01	-1.13	1.14	1.71
-0.509	-1.73	-0.59	-0.389		0.52	-1.56	0.626	1.26	1.56
-1.02	-1.86	-0.308	-1.16		0.425	-1.28	-1.11	0.168	0.241
-0.394	-2.07	-0.445	-1.25		-0.175	-0.935	0.502	0.771	1.02
-0.537	-1.3	0.24	-1.66		-0.0607	-0.745	0.189	0.16	-0.217
0.41	-1.12	-0.0205	-1.56		-0.573	-1.25	0.176	1.27	-0.858
0.392	-1.53	-0.637	-1.75		-0.152	-1.04	-0.123	1.43	-0.362
0.0255	-2.19	-0.274	-1.63		-0.247	-1.43	-0.568	0.411	-0.701
-0.392	-2.1	0.174	-1.2		-0.0227	-1.05	1.27	1.11	-0.655
-0.103	-1.85	-0.194	-0.976		0.0677	-1.17	-0.906	0.655	-0.4
-0.253	-1.22	0.00808	-0.65		-0.844	-0.954	-0.904	0.422	1.65
-0.536	-1.43	0.301	-0.25		-0.509	-0.64	-2.09	0.164	0.816
-0.613	-2.03	-0.212	-0.138		-0.853	-1.27	-1.26	0.123	0.753
-1.15	-1.44	0.288	-0.796		-1.21	-1.1	-1.24	-0.222	0.332
-0.638	-1.41	0.108	-0.934		-0.898	-0.472	-1.5	0.211	0.22
0.405	-1.14	-0.0949	-0.477		-1.13	-1.04	-0.902	0.23	1.21
0.089	-0.594	0.144	-0.519		-0.885	-0.788	-0.426	0.0142	1.3
-0.251	-0.862	0.0273	-0.51		-1.05	-0.903	0.0584	-0.53	0.573
-0.462	-1.1	-0.243	-0.495		-0.945	-0.13	-0.946	0.0125	-1.18
-0.49	-1.4	-0.393	-0.755		-0.417	0.688	-0.888	-0.527	-1.73
-0.617	-0.976	0.101	-0.128		-0.717	1.13	-2.27	-0.484	-2.06
-0.984	-0.921	0.0672	0.411		-0.636	0.447	-1.37	-0.52	-0.589
-0.712	-1.01	-0.58	0.232		-1.01	0.556	-0.429	-0.877	-0.742
-0.864	-0.43	-0.754	0.28		-0.767	0.494	-0.461	-0.368	-1.3
-0.693	-0.509	-0.715	-0.0502		-0.788	0.293	-0.241	0.602	-1.12
-1.18	-0.303	-0.146	-0.0833		-0.761	0.0372	0.314	0.533	0.351
-0.686	-0.289	-0.797	-0.24		-0.832	-0.0639	-1.17	-0.564	0.216
-0.126	-0.532	-0.982	-0.0611		-0.158	0.192	0.377	-0.286	-0.244
-0.233	-0.289	-1.06	-0.271		-0.333	-0.137	-2.01	-0.173	-0.147
-0.15	-0.407	-0.467	-0.00632		-0.881	-0.47	0.831	0.108	-1.26
0.684	0.06	-0.603	-0.0147		-0.612	-0.4	-1.54	-0.194	1.02
0.877	-0.334	-1.41	-0.284		-0.491	-0.0773	-0.994	-0.75	0.262
0.213	-0.586	-1.02	-0.244		-0.485	-0.281	-0.697	-0.0267	-0.348
0.324	-0.442	-0.784	0.129		-0.973	-0.436	-0.92	-0.0986	-1.14
0.225	-0.0537	-0.731	-0.742		-0.856	-0.369	-0.283	0.25	-1.3
-0.67	-0.627	-0.833	-0.433		-1.04	-1.01	-1.12	-0.495	-0.183
-0.601	-0.805	-0.78	0.254		-0.89	-1.01	0.562	-0.376	-0.451
-0.0984	-0.618	-0.66	0.0295		-0.879	-0.894	-0.53	0.122	-0.177
-0.354	-0.726	-1.42	0.291		-1.4	-1.18	-1.38	-0.629	-0.68
-0.773	-0.928	-1.7	-0.251		-0.807	-0.965	-0.619	-1.43	0.364
0.272	-0.803	-1.71	-0.0898		-1.05	-0.78	-0.919	-0.729	-0.154
-0.471	-0.837	-1.61	0.257		-1.39	-1.05	-1.15	-0.717	-0.221
-0.424	-1.18	-2.33	0.284		-0.567	-0.44	-0.498	-0.418	0.458
-0.4	-0.848	-1.82	0.263		-0.941	-0.417	1.23	-0.185	-0.203
-0.803	-0.381	-0.833	0.133		-0.915	-0.199	-1.15	-0.39	-0.374
-0.506	-0.335	-0.92	0.184		-0.311	-0.307	-0.236	0.335	0.599
-0.504	-0.674	-0.386	0.182		-1.1	-0.716	0.129	0.153	-0.545
-0.418	-0.643	-1.09	0.119		-0.603	-0.55	-0.098	-0.675	0.738
0.49	-0.884	-1.01	0.362		-0.772	-0.6	1.16	0.182	-1
0.114	-0.784	-0.583	-0.152		-1.17	-0.467	-0.466	0.199	0.532
0.464	-0.778	0.525	0.452		-1.18	-0.331	-0.361	-0.662	-1.14
-0.0218	-0.887	0.486	1.23		-0.769	-0.527	0.259	1.09	-0.611
-0.16	-0.445	0.645	1.35		-1.16	-0.663	0.412	1.28	-0.575
-0.199	-0.19	-0.345	1.48		-1.23	-1.28	0.245	1.53	-0.269
-0.279	-0.222	-0.345	1.75		-1.29	-1.23	1.64	2.03	-0.488
-0.698	-0.353	-0.425	1.5		-0.988	-1.09	-0.125	1.47	-0.0112
-0.62	-0.374	0.759	0.65		-1.19	-1.01	0.375	1.13	1.7
-0.724	0.102	-0.463	0.773		-1.66	-0.788	-0.613	0.653	-0.0771
-0.704	0.503	-0.296	0.303		-1.27	-0.919	-0.731	0.584	1.69
-0.89	0.111	-0.272	0.727		-1.83	-1.24	0.486	0.398	-0.145
-1.52	0.338	-0.565	0.768		-1.47	-0.997	-0.348	-0.0309	0.578
-0.359	0.63	-1.11	0.574		-1.49	-0.253	-0.704	0.564	-0.185
-0.0841	0.578	-0.645	0.397		-1.46	-0.603	-0.936	0.752	0.725
-0.23	0.922	-1.33	1.1		-1.24	-0.599	-0.0488	0.895	1.16
-0.582	1.69	-0.84	0.971		-1.86	-0.458	-1.43	0.891	1.79
-0.00588	1.93	-0.926	1.07		-1.14	-0.479	-0.933	0.671	0.888
0.459	3.25	-0.592	0.941		-1.2	0.524	-0.429	1.06	0.427
0.779	3.32	-0.624	0.234		-2.18	1.76	-0.447	-0.246	0.547
0.59	2.53	-1.4	-0.671		-1.52	2.64	-1.36	0.701	1.87
0.214	2.61	-1.59	-0.617		-1.08	1.96	-0.643	0.386	1.45
0.243	2.13	-1.71	-0.392		-1.08	2.23	-0.446	0.419	0.743
-0.2	2.43	-0.94	-0.581		-1.46	2.39	-0.688	0.133	0.997
-0.494	1.82	-0.49	-0.609		-1.15	2.38	-1.19	0.459	1.17
-0.551	1.96	-1.34	-0.0822		-1.16	1.54	0.368	0.948	0.763
-0.488	1.48	-1.9	0.223		-1.26	1.92	0.33	0.425	0.305
-0.761	1.89	-1.84	0.882		-1.04	1.8	-1.14	0.969	1.04
-1.14	1.33	-1.12	0.248		-1.38	1.11	-1.26	0.937	0.929
-0.777	1.22	-0.988	-0.21		-1.69	0.996	-1.35	0.442	0.261
-0.922	1.13	-1.03	-0.211		-1.64	1.96	-1.48	0.902	-0.661
-0.716	0.925	-0.545	0.661		-1.38	1.7	-1.11	1.21	1.1
-0.476	1.39	-0.319	0.459		-0.919	1.27	-1.43	1.11	1.75
-0.877	1.79	0.264	-0.531		-0.258	1.57	-1.23	0.904	1.87
-0.506	1.43	0.493	-0.165		-0.667	1.85	-0.75	0.579	-0.337
1.32	1.33	-0.409	-0.175		-0.136	1.33	-0.438	0.751	-0.739
1.89	1.13	-0.0481	-0.46		-0.573	1.2	0.574	0.826	-0.618
0.985	0.966	-0.908	-0.0498		-1.44	1.31	-0.45	1.67	0.0397
1.92	0.76	-0.317	-0.908		-0.0822	0.933	-0.487	0.399	2.35
2.66	0.546	-0.231	-0.352		-0.101	0.837	-1.06	0.127	0.775
1.89	-0.149	-0.656	0.0802		-0.148	1.01	0.427	-0.393	1.4
1.08	-0.237	-0.412	-0.275		-0.3	1.52	0.14	0.894	1.38
1.66	0.319	-1.16	-0.817		-0.808	0.756	0.998	0.147	-0.0268
1.16	0.231	-0.748	-0.57		-0.472	1.59	0.747	0.515	0.539
1.57	0.384	-1.55	-0.08		-0.375	1.99	0.255	1.44	0.45
1.69	-0.322	-1.87	0.348		-0.511	1.61	0.0921	2.15	1.37
1.25	-0.823	-1.89	0.0225		-0.637	1.68	1.03	0.611	1.48
1.58	-0.611	-1.48	0.0856		-0.317	1.9	-0.348	1.15	1.96
1.31	-0.988	-1.11	-0.335		-0.0362	1.35	-0.81	1.32	2.08
0.238	-0.907	-1.42	0.0761		0.175	1.19	-0.935	1.4	1.39
-0.774	-0.947	-0.332	-0.514		-0.446	1.13	-1.88	1.41	0.235
-0.333	-1.22	-1.64	-0.494		-0.681	0.955	-1.43	0.709	1.9
0.43	-0.694	-0.576	-1.24		-0.94	1.06	0.995	0.951	0.533
1.14	-0.525	-0.692	-0.225		-0.163	0.814	0.91	1.19	-0.401
0.308	-1.31	-0.565	-0.525		0.0458	0.855	-1.97	1.63	0.271
0.191	-1.29	-0.566	0.207		-0.513	0.358	-1.84	0.762	0.112
0.0729	-0.998	-0.848	0.476		-1.04	0.736	-0.304	-0.814	0.807
-0.377	-0.772	-0.829	0.796		-0.93	0.814	-1.65	-0.932	1.58
-0.125	-0.845	-0.733	2.23		-0.893	0.517	-0.829	-0.0704	0.822
-0.288	-1.04	-0.977	1.55		-1	0.534	0.335	-0.421	3.09
-0.814	-0.824	-0.233	2.06		-1.22	0.658	-1.08	-0.671	1.25
-0.813	-0.959	0.00774	1.85		-1.16	0.746	-0.859	-1.61	0.442
-0.0569	-0.73	0.363	1.86		-1.12	0.735	-0.546	0.122	0.0184
0.272	-1.07	-0.207	1.31		-0.833	0.721	-0.601	0.454	1.51
-0.826	-0.712	-0.318	0.85		-0.613	0.691	-1.89	-0.416	0.494
0.0486	-0.782	-0.694	0.46		-0.771	1.1	-0.796	0.0613	-0.381
0.113	-1.17	-0.629	0.475		-0.845	1	-0.693	0.165	0.94
-0.295	-0.654	-0.321	0.653		-0.698	1.39	-1.12	0.635	-0.266
-0.75	-0.611	-1.3	0.027		-1.67	1.2	-0.493	0.58	0.884
-1.06	-0.18	-0.949	0.623		-0.298	0.992	-1.74	-0.304	1.11
0.062	0.587	-0.736	0.243		-0.613	1.47	-2.17	0.0213	1.07
-0.432	0.589	0.0388	0.226		-0.256	0.943	-2.9	0.291	0.869
-1.32	0.492	-0.0276	0.137		-0.598	0.836	-1.03	0.0231	0.199
-0.919	0.102	-0.972	0.394		-1.04	1.39	-2.43	-0.436	1.04
-0.781	-0.159	-0.459	0.907		-0.688	1.44	-1.02	-0.51	1.02
-1.05	-0.123	-0.567	0.953		-0.816	0.931	1.21	-0.158	0.503
-0.235	-0.235	-0.902	0.862		-0.559	0.598	-0.29	-0.742	-0.262
-0.3	0.396	-0.719	1.04		-1.02	1.34	-0.242	-0.0884	-0.741
-0.41	0.241	0.23	0.769		-1.09	0.928	0.604	-0.635	-0.262
0.0152	0.282	0.561	0.304		-1.17	1.36	-1.36	-0.284	-0.0261
-0.472	0.754	0.207	0.119		-1.05	1.19	0.0204	-1.18	-0.477
0.377	0.426	0.267	1.03		-1.1	0.677	-0.995	-1.04	-0.374
-0.217	0.528	-1.04	0.764		-1.24	0.429	0.949	-0.791	-0.495
-0.687	0.29	-1.06	0.445		-0.96	0.397	-0.563	-0.268	-0.723
-0.642	0.35	-0.731	0.0697		-0.772	0.193	-0.698	-0.522	0.0381
-0.662	0.33	-0.458	-0.373		-0.927	0.595	-0.915	0.552	-0.393
-0.543	-0.153	-1.29	-0.148		-1.05	0.401	1.89	-0.716	0.278
-0.535	-0.175	-0.497	-0.362		-0.784	-0.0056	1.33	-0.314	0.0121
-0.736	0.111	-0.134	-0.986		-1.23	0.0917	-0.477	-0.263	0.0369
-0.602	0.153	-1.13	-0.429		-0.516	-0.237	0.011	-0.228	-0.365
-0.616	-0.0121	-0.466	-0.912		-1.04	0.286	-0.175	0.284	0.363
-1.05	-0.364	-1.58	-0.43		-0.942	-0.0171	-2.05	-0.244	0.796
-1.06	0.217	-1.38	0.185		-1.46	-0.185	-0.497	-0.654	0.022
-1.14	0.497	-1.5	0.365		-1.53	-0.0728	-1.33	-0.874	-0.368
-1.05	0.318	-1.29	0.112		-1.15	0.0405	-0.603	-1.02	1.36
-0.982	0.47	-1.33	0.573		-1.3	0.203	-0.242	-0.675	-0.496
-0.971	0.732	-0.514	0.26		-0.317	-0.379	-0.219	-0.7	0.204
-1.3	0.655	-0.865	0.513		-1.06	0.0866	-2.06	-0.852	-0.528
-0.721	-0.0138	-2.23	-0.0813		-1.77	-0.466	1.8	-1.15	-1.71
-0.767	0.388	-2.15	0.601		-1.15	-0.804	0.962	-1.26	0.378
-0.758	0.658	-2.2	0.153		-0.895	-0.169	0.847	-1.12	-0.168
-0.857	0.331	-1.37	0.144		-1.63	0.07	-0.614	-0.883	1.13
-0.507	0.0555	-1.4	0.679		-0.939	0.143	-0.171	-1.32	-0.383
-1.39	-0.0402	-1.38	1.67		-1.17	0.87	-0.569	-1.1	-0.385
-0.933	0.373	-0.781	2.56		-0.938	1.06	-0.53	-1.36	-0.592
-0.776	0.129	-0.304	1.87		-1.17	0.747	0.268	-2.26	0.517
-0.656	-0.104	0.186	0.823		-1.08	1.06	-0.379	-1.49	-1.04
0.192	0.183	0.00991	1.06		-1.22	0.908	-1.4	-1.38	-0.156
0.131	-0.0706	-0.352	0.644		-1.74	1.5	-1.17	-1.11	-0.0484
0.0322	-0.344	-0.12	0.77		-0.991	1.38	-1.95	-0.2	0.44
-0.0128	-0.412	-0.2	-0.266		-0.977	1.52	-2.07	0.505	0.707
-0.6	-0.107	-0.166	0.101		-1.23	1.29	0.143	0.197	1.18
-0.751	0.101	-0.688	0.64		-1.32	1.39	-0.926	-0.206	1.71
-0.86	-0.0635	-0.901	0.364		-1.75	0.605	-0.534	-0.575	-0.335
-0.534	-0.119	-0.223	0.459		-1.37	0.76	-0.834	0.103	0.739
-0.582	-0.019	-0.624	0.538		-1.62	1.12	-1.31	-0.308	1.03
-0.62	0.0726	-0.793	0.141		-1.32	1.03	-0.182	0.722	-0.937
-0.156	0.164	-0.745	0.521		-1.41	0.739	-1.05	-0.554	-0.00944
-0.159	0.287	-0.657	0.618		-1.08	0.683	-0.0802	-0.22	-0.445
0.293	0.251	-0.484	0.82		-1.23	1.03	1.88	0.18	-1.35
0.395	-0.0368	-0.799	0.0955		-0.984	1.02	-0.668	0.558	-0.76
0.559	0.197	-0.87	-0.512		-0.952	0.982	0.189	-0.498	-1.78
-0.168	0.0545	-0.313	0.0825		-1.11	1.1	0.58	-0.274	-0.935
-0.0409	-0.135	-0.696	-0.144		-0.929	1.37	-0.0017	-0.732	-0.984
-0.205	-0.242	0.0706	0.106		-0.494	1.1	-0.737	-0.0105	-1.68
0.0718	-0.144	0.00101	0.426		-0.413	1.02	0.293	-1.33	-1.36
0.283	-0.451	-0.0963	0.812		-1.28	1.01	0.855	-0.0218	-1.23
0.399	-0.245	-0.685	0.856		-0.532	0.8	0.117	-0.0249	-1.9
0.933	-0.242	-0.442	0.158		-0.454	0.547	-0.537	-0.373	-0.711
0.77	-0.263	-0.877	0.0329		-1.28	0.691	-0.171	-1.64	-1.02
0.39	-0.454	-1.97	0.481		-1.29	0.298	1.15	-0.35	-0.815
0.0264	-0.567	-1.31	-0.113		-0.319	0.373	1.45	-0.716	-0.827
0.123	-0.726	-1.22	-0.234		-0.84	0.563	-0.48	-0.0254	0.467
-0.206	-0.635	-1.04	0.293		-1.56	0.599	-0.499	-0.836	-0.367
0.0349	-0.209	-1.24	0.216		-0.734	1.28	0.0682	-1.45	-1.09
0.489	-0.367	-1.51	-0.116		-0.246	1.33	-1.45	-1.79	-1.12
-0.378	-0.553	-0.915	0.0447		-0.57	1.55	-2.07	-1.16	-0.403
0.278	0.00372	-0.909	-0.0651		-1.55	1.34	-0.777	-1.08	-0.457
-0.485	0.0735	0.0688	0.466		-0.431	1.31	-0.0965	-1.18	0.176
0.299	-0.25	-0.938	0.8		-0.83	1.2	-0.0265	-0.957	0.00639
0.095	-0.0728	-0.964	0.299		-0.875	1.13	-1.25	-0.084	0.124
2.36	-0.376	-0.414	-0.279		-0.497	1.69	-1.33	-1.5	0.853
0.429	-0.364	-1.02	0.15		-0.211	2.21	-0.248	-0.213	1.42
0.74	-0.445	-1.11	1.21		-1.1	1.99	0.511	-0.262	0.686
0.494	0.0749	-2.4	0.554		-0.461	1.66	0.0594	-0.309	0.637
0.544	-0.0381	-1.46	-0.309		-0.805	1.9	1.6	-0.461	0.727
0.399	-0.028	-1.08	0.311		-0.993	1.93	-1.23	-0.676	0.93
-0.145	0.153	-0.79	0.69		-0.524	1.59	-1.44	-0.595	0.374
0.0213	-0.0514	-1.75	-0.159		-0.404	1.46	0.517	-0.699	-2.11
0.0301	0.00199	-2.21	0.452		-0.168	1.37	-0.747	-0.38	-0.0747
-0.0793	-0.139	-1.85	0.35		-0.484	1.12	2.95	-1.03	0.169
0.202	0.0166	-2.45	0.666		-0.482	1.43	0.508	-1.1	0.35
0.298	0.552	-1.47	0.411		-0.498	0.592	-0.275	-1.36	-0.945
0.393	0.469	-1.5	0.33		-0.508	0.945	1.29	-1.15	0.371
-0.00935	0.54	-1.55	0.91		-0.213	1.42	0.358	-0.781	-0.498
-0.212	0.0782	-0.746	0.453		-0.47	1.19	-0.291	-0.333	-1.12
-0.0214	-0.222	-1.91	0.402		-0.682	1.11	-0.0126	0.138	-0.0827
-0.196	0.268	-2.24	0.463		-0.343	0.556	0.286	-0.0904	-2.03
-0.503	-0.163	-2.05	0.225		-0.66	1.06	0.183	0.294	-2.23
-0.359	-0.101	-2.13	-0.131		-0.334	0.509	1.13	-0.063	-0.945
-0.203	0.0556	-1.52	0.382		-0.681	0.777	-0.675	0.15	-2.31
-1.21	-0.471	-1.06	0.544		0.294	2.49	0.85	0.841	-1.57
-1.58	-0.437	-1.15	1.08		-0.513	4.59	-0.498	0.735	-2.1
-1.89	-0.424	-1.55	1.47		-1.12	4.53	0.0755	1.56	-1.07
-0.981	-1.01	-1.63	0.899		-0.623	4.88	-0.236	0.692	-0.699
-0.83	-1.15	-0.965	1.48		-1.08	4.3	1.38	2.54	-0.371
-0.792	-1.19	-0.65	0.78		-1.22	3.99	0.0848	1.79	-0.697
-0.47	-0.821	-0.851	0.893		-0.844	3.62	2.05	1.46	-1.39
-0.866	-1.04	-1	1		-0.137	2.77	2.12	2.31	-1.46
-0.685	-0.649	-1.07	1.11		-0.993	3.02	2.5	1.3	-1.55
-1.24	-0.834	-1.35	0.471		-0.215	3.03	1.53	1.61	-1.33
-1.29	-1.19	-1.21	0.407		-0.19	3.5	0.911	1.84	-1.26
-0.7	-1.14	-0.821	0.237		-0.0249	3.29	-1.2	0.81	-1.15
-0.672	-1.17	-1.31	0.348		-0.0288	2.91	-0.644	-0.292	-2.16
-0.674	-1.1	-0.664	0.278		-0.566	2.58	-0.568	0.897	-1.56
-0.49	-0.777	-1.26	0.219		0.257	2.28	-0.823	0.184	-1.63
-0.073	-1.08	-0.788	-0.658		-0.456	2.2	-0.208	1.38	-1.01
-0.181	-0.511	-0.702	-1.26		-0.00192	2.39	-0.833	1.4	-1.62
0.0107	-0.675	-0.96	-1.64		0.424	2.28	-0.734	1.24	-1.58
-0.232	-0.788	-1.03	-1.17		0.0581	2.06	-0.863	0.691	-1.38
-0.632	-0.594	-0.311	-0.943		-0.0086	1.85	-1.15	0.818	-1.49
-0.7	-0.788	-0.618	-0.886		0.171	2.24	-0.711	0.485	-0.781
-0.988	-0.786	-0.223	-0.424		-0.238	2.12	-0.614	-0.2	-0.87
-1.31	-0.804	-0.89	-0.353		-0.24	2.28	-1.03	0.49	-0.556
-0.564	-0.474	-1.36	0.118		0.186	2.12	0.069	0.918	0.369
-0.586	-0.68	-1.19	-0.568		-0.113	1.54	-0.309	0.548	-0.849
-0.283	-1.24	-1.53	-0.239		0.0382	1.77	-1.47	-0.346	-1.22
-0.401	-1.2	-1.22	0.256		-0.0357	1.48	-1.35	0.34	-1.88
-0.413	-1.3	-1.5	0.372		-0.39	1.53	-0.709	-0.531	-0.787
0.154	-0.679	-2.82	-0.194		0.551	1.68	-0.786	-0.726	-1.22
0.691	-0.583	-1.76	-1.12		-0.392	0.987	-1.34	0.285	-1.87
0.42	-0.184	-2.09	-1.19		-0.347	1.09	-0.535	1.22	-1.57
0.343	-0.389	-1.51	-0.762		-0.867	1.21	-0.378	0.306	-1.2
0.586	-0.19	-1.02	-0.875		-0.456	1.22	0.867	1.01	-1.91
0.324	-0.172	-1.1	-0.276		-0.72	1.88	-0.622	1.2	-1.83
-0.0293	-0.151	-0.535	-0.824		-0.644	1.78	1.38	1.23	-1.47
-0.0746	-0.494	-0.101	-0.0374		-0.89	1.16	-1.09	0.524	-1.13
-0.247	-0.11	-0.647	-0.15		-0.593	1.41	0.111	0.963	-0.123
0.21	0.356	-0.797	0.2		-0.778	1.11	1.15	2.05	-0.803
0.151	0.05	-1.15	0.228		-0.877	0.841	1.43	2.71	-0.748
-0.249	-0.129	-1.13	-0.0317		-0.664	0.939	0.714	2.64	-2.26
-0.659	-0.27	-0.69	-0.169		-1.17	1.46	1.49	1.62	-2
-0.34	-0.0561	-0.975	0.0202		-0.852	1.45	2.34	2.44	-2.01
-0.636	-0.0314	-0.0129	0.203		-1.14	1.3	0.553	1.92	-0.928
-0.657	0.0634	-1.29	-0.108		-1.52	1.95	0.77	2.15	0.179
-1.28	-0.0407	-0.201	-0.818		-1.02	3.21	-1.14	1.22	-0.946
-0.599	-0.291	-1.13	-0.116		-0.343	3.91	0.237	1.11	-1.35
-0.736	-0.102	-1.42	-1.02		-0.845	4.36	0.889	0.955	-1.14
-1.24	0.216	-0.846	-0.659		-1.21	4.1	-1.26	1.08	0.0562
-0.686	-0.175	-0.513	-0.305		-0.724	3.44	-0.362	0.942	-1.01
-0.894	-0.0881	-0.926	-0.0681		-0.662	3.38	0.546	0.33	0.173
-0.592	-0.151	-0.871	0.286		-0.281	3.26	-0.229	0.105	-0.339
-0.775	-0.104	-1.5	0.96		-0.277	3.19	-0.0445	-0.0686	-0.361
-0.448	0.0868	-0.741	0.393		-0.152	2.69	0.72	-0.418	0.183
-0.324	-0.207	-0.742	-0.201		-0.495	2.07	1.38	-0.611	0.933
-0.299	-0.0146	0.406	0.471		-0.674	1.82	1.19	-0.458	1.29
-0.392	0.0305	0.19	0.561		-1.27	2.25	1.17	-1.16	0.196
-0.317	0.165	-0.272	0.0514		-0.729	2.23	-0.565	-0.434	0.291
-0.299	0.387	0.775	0.184		-0.645	1.81	-0.304	-1.1	0.644
-0.0133	0.281	0.614	1.12		-0.406	2.18	0.759	-0.884	0.577
0.754	0.305	-0.212	1.3		-1.04	2.01	-0.759	-0.771	-1.74
0.558	0.271	0.493	1.41		-0.623	2.09	1.41	-0.155	0.0438
-0.35	0.457	1.05	0.93		-0.478	1.21	-0.902	0.0981	-1.09
0.259	0.473	0.829	0.959		-0.674	1.34	-0.547	-1.08	-0.56
-0.0127	0.995	0.803	0.921		-0.442	0.985	0.225	-2.18	0.109
-0.0917	0.51	0.39	0.628		-0.0868	0.997	0.41	-1.15	-0.252
0.309	0.19	-0.319	0.741		-0.425	0.853	1.6	-1.6	-0.366
0.77	0.693	0.209	0.603		-0.0477	0.995	0.41	-1.32	-0.45
0.399	0.638	0.0608	0.515		0.53	1.2	-0.892	-1.82	-1.18
1.11	0.553	-0.231	0.711		0.378	1.22	1.43	-1.12	0.422
0.788	0.675	-1.18	1.52		0.163	1.03	-1.1	-2.32	-1.64
0.311	0.547	-0.567	1.05		-0.152	0.172	-0.174	-2.16	-0.453
0.338	1.07	0.159	1.03		0.323	0.409	0.123	-2.58	-0.833
0.686	0.764	-0.563	1.17		-0.103	0.0125	-0.905	-1.25	-1.12
0.844	0.667	-0.988	1.44		0.0467	-0.113	1.1	-1.7	-0.492
1.39	0.76	-0.574	1.67		-0.307	0.162	0.433	-1.33	-0.442
0.583	0.751	-0.745	2.01		0.242	0.102	-0.00802	-1.22	-0.777
0.753	0.387	-0.393	2.15		-0.757	0.0671	-0.51	-1.44	-0.966
0.646	0.451	-0.247	1.79		-0.0238	-0.682	1.26	-1.32	-1.54
0.869	0.193	0.137	1.64		-0.639	0.151	0.575	-0.77	0.216
0.458	0.0385	0.154	1.75		-0.636	-0.0536	0.663	-1.18	0.00516
0.639	0.588	0.197	1.77		-0.624	-0.231	2.36	-1.4	-1.65
0.737	0.931	-0.645	1.03		-0.0892	-0.182	0.303	-1.96	-0.651
1.09	0.598	-0.283	0.814		-0.328	-0.598	0.242	-1.02	-0.717
1.06	0.395	-0.751	1.45		-1.1	-0.564	0.524	-0.512	-1.31
1.16	0.723	-0.215	1.23		-0.924	-0.508	-0.402	0.215	-0.742
1.22	0.57	-1.11	0.97		-0.738	-0.399	0.748	-0.582	0.569
1.47	0.566	-0.504	1.22		-0.475	-0.499	-0.929	-0.295	-0.262
1.88	0.46	-0.39	1.04		-0.62	-0.564	-0.213	-0.547	-0.0204
1.44	0.459	0.147	1.01		-0.292	-0.551	0.589	-0.794	-0.719
0.631	0.566	0.0275	0.507		-0.52	-1.24	-1.59	-1.35	-0.348
1.43	0.432	-0.68	1.06		-0.524	-0.536	-0.838	-1.31	-1.35
1.3	0.331	-0.45	0.532		-0.663	-0.879	0.0637	-0.707	-0.675
1.07	0.54	-0.18	0.934		-0.805	-0.868	-0.198	-1.91	-0.318
1.38	0.762	0.513	0.666		-1.05	0.211	0.456	-0.192	-0.366
1.32	0.648	-0.308	0.452		-0.772	-0.238	-1.2	0.72	-0.199
0.701	0.585	0.0804	0.934		-0.767	-0.556	1.36	0.453	-0.084
1.32	0.65	0.189	0.562		-0.924	-0.471	1.44	0.126	-1.37
0.712	0.688	-0.553	1.18		-0.524	-0.741	-1.48	0.119	-1.19
1.7	0.98	-0.36	1.45		-0.367	-0.947	0.662	0.389	-0.162
2.75	0.754	-0.138	1.49		0.247	-0.588	-0.511	-0.0646	-1.28
2.46	0.538	-0.101	1.07		-0.0268	-0.71	-1.01	-0.765	0.428
2.53	0.531	-0.278	0.875		0.0076	-0.72	0.333	-0.194	0.0631
2.25	0.157	-1.01	0.518		0.165	-1.42	-1.1	1.12	-0.829
1.76	0.769	-1.98	0.264		-0.0107	-1.7	0.414	1.46	0.0651
2.19	0.588	-1.34	0.535		-0.481	-1.16	-0.0386	0.983	-0.244
1.75	0.712	-2.23	0.532		-0.483	-0.526	0.0777	0.164	-0.0734
1.35	0.783	-0.944	1.14		-0.228	0.0429	-1.07	0.119	-1.59
1.29	0.789	-1.49	1.17		-0.331	-0.204	-0.315	0.725	0.369
1.55	1.03	-0.581	0.576		-0.0079	-0.767	1.34	0.776	-1.21
1.26	1.11	-1.62	0.787		-0.903	-0.824	2.48	1.66	-0.098
0.997	1.01	-1.87	0.00541		-0.646	-0.521	1.71	0.857	0.321
1.12	0.361	-1.86	0.389		-0.692	-0.754	-0.221	0.728	0.313
1.76	0.653	-1.93	0.918		-0.727	-0.476	0.36	0.468	0.833
0.9	0.546	-1.78	0.217		-0.958	-0.666	0.637	-0.498	1.34
1.51	0.274	-0.975	-0.703		-1.11	-1.22	0.853	0.814	-0.0847
1.54	0.0245	-1.05	-2		-1.17	-1.42	0.916	-0.251	-1.67
1.4	0.523	-0.987	-1.99		-1.22	-1.28	0.0837	0.00705	-0.598
1.65	0.404	-1.14	-1.55		-1.45	-1.62	1.17	0.0498	-0.978
1.79	0.0994	-1.12	-1.46		-0.651	-1.57	-0.388	-0.199	-0.274
1.57	0.0125	-0.937	-1.41		-0.92	-0.966	1.04	0.568	0.57
1.54	0.375	0.0947	-1.08		-1.4	-1.37	0.906	-0.247	-0.146
1.53	0.28	0.0968	-0.331		-1.48	-1.84	0.293	-0.27	0.903
2.04	0.318	0.241	-0.0613		-0.566	-2.16	-0.543	-0.837	-1.6
1.61	0.112	0.00273	0.228		-1.16	-1.63	2.07	1.33	0.325
2.3	-0.428	-0.342	0.583		-1.31	-1.71	-0.0106	3.59	-0.942
1.73	-0.256	-0.713	-0.0341		-0.64	-1.26	1.21	3.52	-0.977
1.85	-0.286	0.02	-0.0821		-1.02	-1.09	-0.152	3.2	-0.183
1.5	-0.63	-0.651	-0.228		-1.62	-0.328	2.11	2.98	0.413
1	-0.254	0.148	0.388		-0.404	-0.979	1.84	3.39	0.4
2.13	0.175	0.521	-0.337		-0.852	-0.87	1.77	2.34	-0.149
1.17	0.19	0.553	-0.434		-1.01	0.976	1.45	2.1	-0.292
1.31	0.198	-0.257	-0.072		-1.63	1.1	0.0636	1.45	-0.431
1.85	1.35	-0.547	-0.436		-1.19	1.21	-0.357	1.92	-0.259
3.62	2.44	-0.549	-0.376		-1.35	1.38	0.311	2.59	-1.55
4.58	2.52	-0.675	-1.23		-1.1	0.628	0.618	1.36	0.0275
4.42	2.79	-0.165	-0.707		-1.64	0.404	-0.0123	1.59	-0.971
4.55	2.46	0.206	-0.16		-1.74	0.979	1.11	1.18	-0.792
4.47	2.04	-0.235	-0.495		-1.17	0.848	1.86	0.992	-1.46
4.94	1.66	-0.0666	-0.294		-1.55	-0.0102	0.576	-0.187	-1.28
4.46	1.43	-0.212	0.423		-1.79	-0.135	1.04	0.107	-1.21
4.33	1.3	0.374	0.249		-1.41	-0.0534	2.47	-0.598	-1.14
3.06	1.21	-0.463	0.12		-1.64	0.0799	0.0167	0.234	-0.59
2.66	1.08	-0.0454	0.0103		-1	0.451	1.65	0.133	0.0548
2.19	0.572	0.465	0.336		-0.984	-0.258	1.84	-0.167	-0.358
2.12	1.02	-0.299	0.23		-0.832	-0.531	0.764	-0.598	-0.524
2.35	1.07	0.299	-0.149		-0.96	-0.615	1.64	-1.11	1.4
2.44	0.916	-0.619	-0.0768		-0.653	-0.295	1.18	-0.158	-1.8
2.32	0.829	0.16	-0.237		-1.22	-0.88	-0.318	-0.613	-0.874
2.04	0.294	-0.497	-0.214		-1.1	-0.894	0.392	0.257	-0.878
1.62	0.625	-0.889	-0.165		-1.29	-0.72	-1.86	-0.986	-1.24
2.23	0.371	-1.58	-0.244		-1.72	-0.783	-0.188	-0.341	-0.817
1.67	1.3	-1.51	-0.764		-1.27	-0.702	-0.773	0.445	0.526
1.67	0.852	-1.13	-0.274		-1.76	-0.279	-0.673	-0.301	0.32
2.57	1	-1.66	-0.341		-1.74	-0.186	0.189	-1.43	-0.122
1.9	1.28	-1.08	-0.335		-1.23	0.295	0.433	-0.583	-1.57
1.97	1.47	-2.49	0.309		-1.34	0.183	-0.11	-0.826	-0.865
2.02	1.08	-2.07	0.217		-1.57	0.107	0.0532	-0.993	0.0446
1.56	0.664	-1.23	-0.0302		-1.18	-0.0139	0.442	-0.616	0.237
1.25	1.03	-0.566	0.863		-1.06	-0.0185	1.62	0.537	0.434
1.18	0.634	0.243	0.279		-1.47	-0.498	1.15	-0.212	-0.659
1.52	0.402	-0.0785	0.44		-0.95	0.0272	0.53	-0.707	-0.919
1.89	0.44	0.175	0.0713		-1.38	-0.338	0.46	-2.07	-0.0742
1.97	0.313	-0.549	0.434		-1.77	-0.632	-0.412	-1.55	0.173
1.81	0.06	-0.651	0.836		-1.48	-0.283	0.485	-1.46	-0.171
1.93	0.22	-0.144	0.752		-0.98	-0.349	-0.119	-0.22	1.85
1.92	0.29	-0.17	0.893		-0.391	-0.236	0.481	-0.347	0.168
1.6	-0.00111	0.247	0.403		-0.0279	0.112	0.54	-1.18	-0.684
1.79	0.507	0.343	0.154		0.834	-0.494	0.842	-1.52	0.731
2.46	0.692	0.22	0.493		0.0681	-1.06	1	-1.09	0.832
2.74	0.612	0.601	0.686		-0.49	-0.766	0.529	-0.6	1.27
2.91	0.602	0.358	-0.307		-0.488	-0.527	0.242	-1.76	1.43
2.27	0.517	-0.287	-0.135		-0.172	-0.537	0.156	-1.56	1.27
1.83	0.515	0.498	-0.775		-1.09	-1.33	-0.695	-0.905	0.687
1.57	0.523	0.816	-1.04		-0.855	-0.346	0.899	-0.623	0.783
1.68	0.233	0.946	-1.17		-0.853	-0.508	-0.0575	-0.828	1.43
1.98	0.453	0.362	-0.599		-0.608	-0.841	0.421	-1.76	0.886
1.94	0.797	-0.135	-0.725		-1.5	-0.966	0.88	-1.69	-0.202
2.26	0.0981	-0.127	-0.308		-0.846	-0.675	0.505	-0.782	0.925
1.81	-0.586	-0.111	0.0366		-1.66	-0.352	1.04	-1.52	0.567
1.49	-0.541	0.068	-0.369		-1.43	-0.537	2.37	-1.4	0.852
0.911	-0.359	-0.435	-1.39		-0.507	-0.365	2.58	-1.16	-0.307
1.15	0.024	-0.0689	-0.893		-1.04	-1.02	1.52	-0.603	-0.108
0.71	-0.63	-0.229	-0.75		-0.597	-1.19	1.48	-1.2	-0.617
0.472	-0.594	-1.21	-0.488		-0.411	-1.24	0.407	-1.46	-1.39
0.0618	-1.01	-0.385	0.284		-0.622	-0.864	0.377	-0.837	-0.418
0.133	-1.24	0.0356	-0.477		-0.954	-0.583	0.0608	-1.48	0.0151
0.538	-0.915	-0.0666	-1.18		-0.796	-0.562	1.06	-1.19	-0.938
0.201	-0.781	-0.41	-1.1		-0.847	-0.0708	-0.133	-1.35	-0.472
0.597	-0.226	-0.19	-1.01		-0.702	0.207	0.623	-0.998	-0.31
0.0107	-0.396	-0.0464	-1.2		-1.67	-0.407	0.803	-1.53	1.07
0.683	-1.26	0.832	-0.393		-0.759	-0.489	-0.312	-1.28	1.1
1.01	-0.369	0.836	-0.457		-1.36	-0.24	1.33	-0.746	-0.0769
1.06	-0.776	1.21	-0.189		-1.12	0.27	1.28	-0.572	-1.25
0.65	-0.929	-0.544	-0.514		-1.35	-0.229	1.45	-1.25	-1.58
0.761	-0.667	-0.653	-0.606		-1.53	-0.916	1.36	-0.996	-0.496
0.756	-0.388	-1.65	-0.652		-1.4	-0.528	0.211	-1.14	-0.71
0.189	-0.385	-1.55	0.0455		-1.42	-0.434	0.321	-0.75	1.13
0.497	-0.9	-0.936	0.283		-1.26	-0.995	1.3	-1.24	0.0178
0.69	-0.772	-0.45	1.41		-1.04	-1.11	2.99	-1.2	-0.204
0.491	-1.04	-0.0993	1.31		-1.33	-0.539	1.22	-1.18	0.228
0.603	-0.996	-0.206	1.63		-1.56	-0.47	1.12	-1.73	0.198
0.814	-0.924	0.163	1.91		-1.49	-0.842	0.54	-1.14	-0.345
0.592	-0.548	-0.262	1.2		-1.09	-0.527	-0.425	-1.36	0.289
0.624	-0.73	-0.0425	1.1		-1.57	-0.295	0.339	-0.672	-0.545
0.791	-0.592	-0.384	0.755		-1.86	-0.469	0.328	-0.966	-1.53
1.08	-0.829	0.0727	0.973		-2	0.162	0.39	-1.17	-1.1
0.716	-0.815	-0.386	1.05		-2.24	-0.444	1.24	-0.829	-0.735
0.429	-1.17	-0.577	0.377		-1.35	-0.526	-1.13	-1.03	-0.331
0.242	-0.954	-0.605	0.567		-1.7	-0.499	-0.764	-0.893	0.193
0.542	-0.775	-0.723	0.91		-2.09	-0.641	0.131	-1.03	0.0648
1.32	-0.427	-0.984	1.27		-1.74	-0.507	1.57	-0.902	-0.879
0.563	-0.824	-1.34	1.21		-1.84	-0.869	1.88	-0.905	-1.08
1.18	-0.462	-1.18	1.28		-2.1	-0.456	2.79	-1.21	-1.13
0.863	-0.225	-0.835	1.26		-1.48	-0.84	2.9	-1.34	-0.345
0.73	-0.661	-1.67	0.711		-1.53	-1.17	0.709	-1.95	-0.358
0.255	-0.443	-1.36	0.257		-1.8	-0.736	2.4	-1.87	-0.963
0.598	-0.553	-1.67	-0.293		-1.16	-0.453	0.53	-2.04	0.467
0.96	-0.769	-1.21	-0.159		-2.13	-1.09	0.623	-1.62	-0.756
1.84	-0.843	-0.192	-0.25		-1.6	-1.41	0.0462	-1.29	-1.4
2.16	-0.382	0.425	0.274		-2.2	-0.674	1.31	-0.313	-2.2
1.66	-0.255	0.439	0.175		-1.69	-0.761	0.372	-0.768	-1.6
1.76	-0.52	1.16	0.223		-2	-1.27	2.38	-0.389	-1.37
1.13	-0.36	0.104	-0.567		-1.76	-1.34	1.96	-0.386	0.322
1.28	-0.433	0.267	-0.364		-1.83	-0.891	1.67	-0.643	-0.663
0.417	-0.538	0.382	-0.551		-2.82	-0.748	0.316	-1.08	-1.28
0.556	-0.56	0.747	-0.00678		-2.03	-0.879	1.17	-1.54	0.265
0.101	-0.423	1.02	-0.163		-1.7	-1.02	1.34	-1.99	-0.106
-0.812	-0.719	-0.247	-0.233		-1.47	-0.617	-0.882	-2.06	-1.36
-1.21	-0.227	0.389	-0.685		-2.19	-0.242	0.675	-1.05	-0.252
-0.925	-0.317	0.412	-0.631		-2.02	-0.572	-1.06	-1.36	0.94
0.0233	-0.348	-0.746	-1.09		-1.81	-0.751	0.894	-0.397	0.673
0.238	-0.647	-0.197	-0.973		-2.08	-0.847	0.393	-0.654	-0.682
0.285	-0.613	-0.407	-0.443		-1.51	-0.915	-0.752	-1	0.628
-0.93	-0.818	-0.0932	-0.356		-1.21	-0.454	-0.506	-1.28	1.29
-0.432	-0.346	0.908	0.626		-1.62	-0.677	-1.21	-0.722	-0.275
-0.28	0.48	-0.13	-0.0175		-1.31	-1.21	-1.03	-0.899	-1.11
0.44	0.943	0.289	-0.276		-1.44	-1.16	-1.68	-1.32	0.584
0.123	0.79	-0.127	-0.62		-1.1	-1.14	-0.482	-1.12	-0.274
-0.0192	0.325	0.684	-0.268		-1.4	-0.736	0.0612	-1.07	-0.33
0.598	0.314	-0.0277	-0.483		-1.56	-1.07	-1.32	-1.73	-0.197
0.0904	0.815	0.254	-0.156		-0.864	-0.771	-0.35	-1.62	-1.02
0.712	1.21	1.27	-0.359		-1.43	-1.51	-0.0161	-1.09	-0.421
0.0787	1.11	1.61	-0.557		-1.28	-1.27	0.224	-0.974	-0.983
0.957	0.993	0.647	0.451		-1.34	-1.42	-1.14	-1.08	0.92
0.0909	1.04	0.706	-0.229		-1.11	-0.7	-0.646	-0.469	-0.317
0.33	0.912	0.196	-0.365		-1.44	-0.83	-0.0118	-0.688	-0.252
0.354	0.72	0.238	-0.356		-1.78	-0.89	-1.27	0.0738	0.0044
-0.115	0.731	0.378	-0.0383		-1.14	-0.519	-0.541	-0.865	-0.495
-0.027	0.916	-0.236	-0.434		-0.859	-0.888	-0.0915	-1.49	0.258
0.202	0.925	-0.21	-0.0985		-1.36	-0.669	2.69	-1.55	-0.325
-0.603	0.621	-0.867	-0.134		-1.65	-0.866	2.33	-1.46	-1.03
-0.681	0.721	0.0689	-0.0783		-1.94	-0.124	-0.485	-1.37	-0.822
-1.1	0.328	-0.691	-0.677		-2.1	-0.301	0.317	-0.0553	0.383
-0.834	0.458	0.447	-1.02		-1.66	-0.162	0.769	-1.35	-0.55
-0.481	0.615	-0.0618	-1.36		-1.54	-0.276	1	-0.756	-0.752
0.349	-0.0249	-0.743	-1.86		-1.52	-0.265	0.469	-1.01	-0.538
0.31	-0.055	-0.375	-0.915		-1.83	0.163	2.67	-1.54	-0.497
0.0695	-0.0977	-0.0593	-1.54		-1.36	-0.126	0.49	-1.62	-1.03
0.031	0.139	0.0909	-1.03		-2.01	0.203	1.16	-1.45	-0.74
-0.243	0.162	-0.645	-1.07		-2.06	-0.728	0.653	-1.39	-1.05
-0.631	0.161	-0.808	-0.885		-1.61	-0.812	-0.385	-1.43	-1.14
-1.4	0.593	-1.31	-0.825		-1.72	-0.483	1.64	-1.7	-0.133
-0.82	0.365	-0.308	-0.0219		-1.92	-0.211	2.83	-1.6	-0.401
-0.915	0.332	-0.342	-0.0299		-1.46	0.0204	2.02	0.0731	-1.14
0.076	0.00734	-0.415	-0.731		-1.41	0.233	1.76	0.548	-1.13
0.47	0.218	-0.575	-1.07		-1.74	0.364	0.888	-0.0934	-0.919
0.336	0.246	-0.0945	-0.781		-1.75	-0.447	1.64	-1.3	-0.434
0.577	-0.0354	-0.486	-0.686		-1.89	0.154	0.978	-1.23	-0.239
0.469	-0.372	-0.534	-0.572		-1.39	0.0999	1.08	-1.36	0.287
1.09	-0.242	-0.338	-0.3		-2.03	0.925	0.0938	-0.953	0.6
0.446	-0.224	-0.112	-0.444		-2.08	0.973	1.75	-0.854	-0.554
0.915	-0.124	0.102	-1.17		-1.77	0.531	0.391	-0.77	0.517
0.713	-0.144	0.253	-1.23		-1.35	0.242	-0.0477	-1.16	-0.568
1.07	-0.178	0.658	-1.16		-1.17	0.313	0.932	-2.22	-0.504
0.492	-0.362	-0.119	-1.07		-0.914	0.429	-0.262	-1.69	-0.656
0.0842	0.351	-0.2	-0.936		-1.27	0.118	0.274	-0.745	0.415
0.057	0.0682	0.0932	-1.33		-1.34	-0.253	1.9	-1.36	-1.59
-0.1	-0.149	-0.129	-1.47		-1.31	0.242	0.222	-1.23	-0.438
0.545	-0.198	-0.207	-1.13		-1.17	0.0386	0.0788	-1.52	-0.00571
-0.156	0.1	-0.0635	-1.6		-1.36	0.136	1.01	-1.36	-0.613
-0.71	-0.431	0.274	-1.44		-0.665	0.0725	0.292	-1.12	0.315
-0.985	-0.308	-0.372	-1.41		-0.97	-0.014	-1.07	-0.912	0.184
-1.64	-0.467	-0.471	-0.906		-0.892	-0.352	-0.897	-0.344	-0.799
-1.21	0.119	-1.25	-0.204		-1.49	-0.362	-0.666	-1.23	-0.807
-0.204	-0.277	-1.41	-0.738		-1.44	-0.366	0.134	-1.28	-0.493
0.09	-0.369	-0.819	-0.357		-1.83	-0.488	-0.447	-1.21	-1.08
-0.363	-0.818	-0.492	-0.827		-1.18	-0.624	-1.84	-1.22	-0.0593
0.0788	-0.53	-1.13	-0.814		-1.4	-0.85	-0.198	-0.971	-1.24
-0.303	-0.396	-0.974	-0.602		-1.22	-0.983	0.473	-0.94	0.152
-0.779	-0.957	-1.19	-0.933		-0.802	-0.678	-0.97	-0.125	0.168
-0.442	-0.897	-0.461	-1.09		-1.11	-0.677	-0.842	-1.13	-1.77
-0.847	-0.74	-0.00442	-1.27		-0.623	0.261	-0.986	-0.756	-1.19
-1.12	-0.651	-0.209	-1.31		-1.82	0.397	0.168	-0.662	-0.585
-1.53	-0.616	-0.248	-1.24		-0.645	-0.293	1.42	-0.0631	-1.44
-0.662	-0.989	-0.0755	-1.63		-0.511	-0.446	0.717	0.196	-0.353
-0.392	-0.601	0.28	-1.29		-0.738	-0.292	-0.843	-0.791	-0.515
0.473	-0.0667	-0.127	-1.08		-0.393	-0.269	0.0156	-0.308	-0.501
0.383	-0.139	-0.104	-1.17		-0.0325	0.0593	0.428	-0.406	-0.267
0.236	-0.425	0.512	-1.52		-0.524	0.491	0.719	-1.2	0.226
0.53	-0.433	0.0368	-0.505		-0.255	-0.275	1.06	-0.595	-0.375
0.401	-0.277	0.767	-0.698		-0.949	-0.14	0.575	-0.831	0.198
0.0542	-0.63	0.144	-0.945		-0.381	-0.594	0.482	0.423	0.0452
-0.107	-0.859	-0.48	-0.801		-1.15	-0.382	2.21	0.357	0.569
0.000661	-0.818	-0.834	-0.737		-0.565	-0.479	0.473	-0.419	-0.628
0.195	-0.889	-0.138	-1.01		-0.541	-0.35	0.113	-0.163	-0.0184
1.26	-0.975	-0.275	-0.847		-0.852	0.25	0.163	-0.17	-1.41
1.09	-0.783	-0.799	-0.676		-0.529	-0.0437	1.86	-0.224	-1.21
0.889	-0.832	-0.747	-0.496		-0.985	0.69	1.69	-0.368	-1.57
1.82	-0.831	-0.338	-0.337		0.102	0.0163	-0.975	0.443	-1.55
1.77	-0.986	-0.713	-0.318		-0.53	-0.447	-1.83	-0.319	-0.946
1.85	-1.49	-0.572	-1.33		0.0105	0.128	-0.125	-1.16	-1.22
1.62	-0.663	1.05	-0.754		-0.717	0.101	0.444	-1.36	-1.67
1.34	-0.847	-0.788	-0.808		-1.06	-0.251	-0.683	-0.513	-1.85
1	-1.25	-0.288	-0.921		-1.13	-0.361	-0.279	-1.39	-0.15
1.07	-1.23	-1.2	-0.756		-1.15	-0.733	-2.07	-1.83	-1.18
0.833	-0.873	-1.2	-1.28		-1.38	-0.782	-1.04	-1.01	0.229
0.656	-0.688	-1.07	-0.521		-1.83	-0.928	-1.27	-1.11	-1.27
0.49	-1.06	-1.7	-0.348		-1.92	-0.832	-0.00509	-1.26	-1.15
0.109	-1.45	-0.962	-0.656		-1.23	-0.594	-0.646	-1.87	-0.92
-0.528	-1.71	-0.786	-0.155		-0.867	-1.02	0.779	-1.42	1.77
0.152	-1.23	-0.327	-0.945		-0.522	-0.849	0.102	-0.462	0.345
-0.259	-1.51	0.265	-0.631		0.000408	-0.807	-0.549	-0.327	-0.339
0.524	-1.55	-0.464	-0.481		-0.323	-1.25	1.66	-0.636	-1.03
0.366	-1.53	-0.29	-0.394		-0.571	-0.218	1.54	-0.414	-0.301
0.235	-1.09	-0.213	0.225		-0.138	-0.708	0.429	0.147	0.285
0.756	-1.24	0.743	0.498		-0.612	-0.264	1.3	0.453	-0.151
0.78	-1.23	-0.18	-0.22		0.54	-0.721	-0.104	-0.00472	0.392
0.564	-0.54	-0.762	-1.53		2.05	-0.0675	1.45	0.619	0.336
0.896	-0.548	-0.776	-1.9		2.17	-0.132	-0.589	-0.0604	-0.66
0.797	-0.338	-0.728	-1.55		1.79	-0.562	0.97	0.353	-0.173
0.517	-0.427	-0.12	-1.09		1.88	-0.483	-0.0938	0.657	-0.386
0.275	0.133	0.0847	-1.39		1.62	-0.503	0.781	0.12	-1.14
0.385	0.525	0.109	-1.82		1.76	-0.868	0.439	-0.692	0.397
0.615	0.103	-0.109	-1.85		1.37	-0.826	1.22	-0.489	-0.785
0.825	0.43	0.445	-1.36		1.32	-0.755	0.467	-0.357	-0.777
1.05	0.0862	-0.818	-1.34		0.508	-0.425	1.13	-0.183	-0.342
0.748	-0.237	-1.46	-1.47		1.33	-1.31	2.12	0.6	0.539
0.637	0.515	-2.24	-0.801		0.478	-0.715	1.96	-0.741	0.58
1.81	0.0691	-1.17	-0.912		0.191	-0.384	1.77	-0.847	-0.52
1.48	0.0909	-0.28	-1.3		0.213	-0.199	0.768	-1.44	-0.893
0.705	-0.0955	-0.829	-0.883		0.5	-0.332	2.85	-1.19	-0.122
0.422	-0.118	-0.399	-1.84		-0.0632	-0.679	0.428	-1.09	0.695
0.717	-0.461	-0.926	-2.54		-0.616	-0.621	1.12	-2.03	0.21
0.335	-0.212	-0.747	-2.01		0.144	-0.75	1.21	-0.849	-1.64
-0.0992	-0.146	-0.572	-1.38		-0.217	-0.789	-0.0779	-1.1	-0.327
0.849	0.507	-0.379	-1.34		-0.116	-1.16	0.0642	-0.432	-1.81
0.0226	0.828	-0.0259	-1.58		-0.347	-1.35	0.697	-0.73	-0.976
0.391	1.19	-0.256	-0.987		-0.669	-0.839	-0.191	-0.274	-2.09
0.531	0.881	-0.271	-1.3		-0.239	-1.17	0.953	-1.41	-1.1
0.0361	0.988	0.142	-1.59		0.277	-1.62	-0.928	-1.65	-2.42
-0.66	0.293	-1.23	-1.4		-0.166	-1.5	0.274	-1.06	-0.063
-0.671	-0.132	-1.03	-0.55		-0.0443	-0.755	0.765	-1.08	-1.03
-0.0882	0.219	0.0688	-0.75		-0.553	-0.554	0.308	-0.999	-1.83
-0.188	0.326	-0.44	-0.435		-0.162	-1.05	-0.325	-1.78	-0.795
0.642	0.643	-0.473	0.0513		0.323	-0.983	-0.654	-1.84	-1.05
1.19	0.583	-0.894	-0.0349		0.247	-1.1	0.333	-0.344	-0.636
0.876	0.497	-0.0712	-0.482		-0.103	-0.897	-0.121	-1.32	-1.88
0.0434	0.739	-0.334	0.145		1.02	-0.74	0.985	-1.61	-1.2
-0.462	0.422	-0.72	-0.289		1.58	0.62	0.37	-0.828	-0.952
-0.0261	0.748	1.08	-0.146		0.899	0.843	0.446	0.123	0.333
-0.418	0.891	1.27	-0.778		0.321	0.613	-0.0664	-0.611	0.144
-0.91	0.726	1.18	-1.08		0.523	0.661	0.984	-0.139	-0.178
-0.537	0.839	0.444	-0.609		0.527	-0.496	-1.29	-0.553	0.361
-0.503	1.08	0.462	-1.08		0.67	0.0259	-0.594	-0.654	0.108
-0.99	0.816	0.516	-1.51		0.188	-0.185	1.21	-0.776	0.716
-0.639	0.298	0.516	-1.3		0.882	0.286	0.403	-0.818	-0.345
-0.745	-0.274	-0.173	-1.87		0.914	-0.0696	0.13	-0.00323	-0.494
-1.01	0.0726	-0.108	-1.58		0.71	-0.87	0.973	-1.47	-0.127
-0.463	0.392	0.0625	-1.63		0.521	-0.0108	0.872	-1.26	-0.119
0.164	-0.115	0.575	-0.741		0.558	0.289	1.41	-0.926	0.217
-0.565	-0.516	0.0263	-0.526		-0.399	-0.164	1.76	-1.93	0.743
-0.493	-0.887	0.0758	-0.766		0.711	0.127	0.578	-1.23	-0.261
-0.292	0.0822	-0.287	-0.899		0.565	-0.123	3.05	-2.26	0.646
-0.259	0.0502	-0.372	-0.71		0.146	-0.581	1.43	-1.05	0.106
-0.0183	-0.398	-1.18	-0.907		0.0774	-0.676	1.76	-0.751	-0.185
-0.567	-0.194	-1.18	-0.563		0.26	-0.641	3.42	0.519	0.777
-0.776	0.127	-0.114	-1.03		-0.158	-0.435	1.63	0.677	0.99
-0.883	-0.352	-0.702	-0.308		-0.621	-0.492	3.58	0.58	0.871
-0.956	-0.172	0.12	-0.618		0.315	0.207	4.08	-0.222	1.12
-0.748	-0.394	-0.0862	-0.427		-0.489	-0.524	1.82	-1.08	-0.205
-0.104	-0.215	0.415	-0.829		-0.232	-0.272	0.313	-0.174	1.1
0.0636	-0.989	0.461	-1.04		0.0604	-0.689	0.811	-0.547	1.12
-0.0749	-0.687	0.442	-1.23		0.117	-0.518	1.1	-0.532	-1.26
0.327	-0.392	0.998	-0.949		1.43	-1.28	1.01	-0.486	-0.55
-0.345	-0.592	1.16	-0.569		2.45	-0.603	2.54	-0.768	-0.909
-0.293	-0.33	0.962	-0.941		2.42	-0.957	1.69	-0.911	-0.555
-0.311	-0.273	0.574	-0.551		2.48	-1.29	2.39	-1.07	-1.26
-1.11	-0.601	0.67	-0.962		2.36	-1.39	2.33	-0.957	-0.933
-1.65	-0.621	1.2	-0.575		1.71	-1.42	0.722	-0.414	-0.0711
-1.03	-0.787	0.609	-0.862		1.51	-0.844	0.537	-0.424	-1.44
-0.592	-0.91	-0.0594	-1.03		1.74	-0.56	1.35	-0.554	-0.414
-0.274	-0.204	0.0416	-1.33		0.898	-0.484	0.538	-0.446	-0.987
-1.04	-0.197	0.237	-0.838		0.784	-0.542	1.42	-0.662	0.558
-0.808	-0.289	-0.123	-1.31		0.513	-0.65	1.42	-0.74	-1.22
-0.747	-0.417	-0.263	-0.994		0.278	-0.665	0.237	-0.337	-0.00236
-0.561	-0.57	-0.325	-1.02		0.82	-1.55	-0.902	-1.42	-0.386
-0.346	-0.286	0.218	-1.5		0.689	-0.797	-0.29	-0.838	-0.736
0.151	-0.659	0.182	-1.27		1.03	0.0401	-1.3	-1.19	0.293
-0.18	-0.789	0.635	-0.548		0.699	-0.157	2.05	-0.977	-1.09
-0.154	-0.556	1.16	-0.783		1.25	0.125	0.414	-1.32	-1.08
-0.212	-0.328	1.64	-1.37		0.81	0.129	1.05	-1.05	0.0428
-0.532	-0.283	0.408	-0.596		0.11	0.286	-0.0703	-1.32	-1.08
-1.05	-0.356	0.126	-0.27		-0.174	1.01	0.606	-0.911	-0.192
-0.529	-0.679	-0.478	-0.42		0.2	0.624	0.591	-0.792	-1.88
-0.63	-0.227	-0.249	-0.301		-0.509	0.0542	0.0751	-1.33	-1.85
-0.408	0.0161	-0.483	-0.938		0.166	0.0414	-0.203	-0.999	-1.1
-0.721	0.275	-0.775	-0.366		-0.117	-0.262	1.96	-2.18	-2.23
-0.0539	0.133	-0.439	-0.597		-0.174	0.0157	1.02	-0.518	-0.92
0.123	0.0744	-0.491	-0.245		-0.387	0.00125	-0.144	-0.687	-1.17
-0.181	-0.13	-0.0178	-0.813		-0.858	-0.373	0.256	-1.3	-0.521
0.588	-0.346	-0.741	-0.569		-0.823	-0.727	-0.202	-0.47	0.221
-0.312	0.204	-0.253	-1.19		-0.388	-0.591	0.0636	-0.236	-1.01
-0.538	-0.282	-0.108	-1.51		-0.423	0.305	-1.06	-1.11	-0.761
-0.593	0.355	0.994	-2.6		-0.798	-0.549	-0.777	-0.998	-1.65
-0.581	0.273	-0.5	-2.29		-1.16	-0.735	0.208	-0.51	-1.8
-1.05	0.41	-0.353	-1.76		-0.504	-0.893	-0.885	0.311	-0.298
-0.793	0.236	0.222	-2.23		0.141	-0.851	-0.886	-0.775	1.04
-0.383	-0.208	0.275	-1.89		2.17	-0.858	-0.758	-0.329	0.479
-0.307	0.246	-0.27	-1.87		3.28	-1.05	0.323	-0.355	0.117
1.79	-0.0357	-0.797	-1.55		3.6	-1.39	0.582	-1.24	1.12
3.4	-0.32	-0.877	-1.13		2.97	-1.18	1.41	-0.275	1.34
2.65	-0.237	-0.746	-0.92		2.86	-0.802	0.513	-0.873	-0.796
2.37	-0.163	-0.447	-0.438		2.15	-0.783	0.091	-1.19	0.891
2.39	-0.439	-0.456	-0.452		2.46	-0.549	-0.352	-1.45	1.18
1.99	0.194	-0.253	0.289		2.11	-1.09	-0.829	-0.935	1.14
1.94	-0.511	0.714	-0.405		1.96	-1.5	-0.137	-1.12	2.28
1.87	-1.03	0.201	-0.433		1.6	-1.27	1.3	-0.66	0.402
1.54	-0.617	0.722	-0.538		1.25	-0.862	0.887	-0.377	1.14
1.86	-0.727	0.0496	0.113		1.29	-1.21	0.334	-0.511	0.529
1.4	-0.723	-0.475	-0.74		1.79	-0.497	-0.754	-0.972	1.05
1.99	-0.864	0.68	-0.153		1.81	-0.599	-0.269	-0.509	-0.16
2.15	-0.659	0.682	0.112		0.954	-0.827	0.788	-0.253	-0.948
2.07	-0.5	0.306	-0.35		0.976	-0.0913	0.081	-0.683	-0.851
2.11	-0.677	0.834	-0.483		1.59	-0.289	-0.406	-0.585	0.0993
2	-0.894	0.818	-0.139		2.4	-0.0667	-0.437	0.212	-0.882
1.99	-0.604	0.603	0.0306		3.53	0.0439	1.68	0.299	0.571
2.1	-0.632	0.241	-0.459		3.17	-0.415	-0.722	0.809	1.76
2.33	-0.183	-0.384	-0.0205		4.07	-0.0846	-1.59	0.251	0.938
2.17	-0.0748	0.16	0.258		6.14	0.213	0.393	-0.651	1.41
1.76	-0.0826	0.0829	0.101		6.47	-0.0411	-1.76	-0.308	0.315
1.27	0.193	0.0496	0.283		6.22	0.658	-0.317	-1.36	1.04
1.46	0.202	0.391	0.318		6.53	-0.345	-1.54	-0.716	0.38
1.68	-0.306	0.0394	0.0784		5.42	-0.0949	0.366	-0.913	-0.114
2.75	-0.296	-0.0282	-0.516		4.92	-0.0487	0.143	-1.2	0.333
4.16	-0.169	-0.0336	-0.821		4.93	0.236	0.226	-1.17	-0.375
4.08	0.00417	-1.06	-0.318		4.56	0.638	1.21	0.584	-0.547
3.8	-0.128	-1.04	-0.84		4.08	1.25	-0.907	0.396	-0.266
4.19	-0.175	-0.746	-0.51		3.97	1.2	-0.69	0.476	-0.133
2.8	-0.167	-0.469	-0.599		3.28	0.731	0.705	0.231	0.876
3.18	-0.541	-0.441	-1.32		3.35	0.192	-0.0394	0.046	-0.171
3.33	-0.423	-0.611	-0.742		2.69	-0.323	-1.01	0.0455	0.769
3.22	-0.251	-0.992	-1.48		3.58	0.769	-0.682	-0.132	-0.307
3.28	-0.262	-0.275	-1.93		2.89	0.282	1.16	-0.404	1.1
3.51	-0.261	-0.433	-1.8		3.58	0.293	-0.342	-0.205	1.29
3.15	-0.425	-0.0198	-1.36		3.37	0.716	0.493	-1.13	0.133
3.86	-0.362	0.172	-1.06		2.25	0.793	1.17	-1.05	-0.589
3.73	0.057	-0.526	-1.39		2.19	0.538	0.97	-0.676	-0.0655
3.83	-0.13	0.189	-0.916		2.1	0.19	0.392	-1.64	-0.115
3.84	0.322	1.19	-0.39		2	0.558	0.747	-1.18	0.00163
4.21	0.813	0.707	-0.538		2.03	0.688	-0.962	-0.577	0.0926
5.38	0.602	-0.0986	-0.209		1.68	-0.16	1.87	-0.00678	0.675
6.25	0.672	0.0923	0.3		1.82	0.0857	1.18	0.596	1.59
5.44	0.301	-0.375	1.16		1.58	-0.301	1.47	-0.365	-1.74
4.68	0.14	0.673	1.52		1.33	0.0132	-1.65	0.311	-1.39
4.38	0.194	0.488	1.98		0.94	-0.136	-1.25	-0.686	-1.52
4.36	0.0745	0.32	2.34		1.31	-0.911	1.54	0.17	-0.387
3.86	0.0686	0.49	2.86		1.54	-1.06	-0.46	-0.395	0.478
3.29	-0.0418	-1.13	1.62		0.976	-1.27	0.0276	-0.00133	-1.27
2.78	0.25	-1.12	1.12		1.17	-1.25	-0.045	0.0941	-1.06
3.04	0.878	-1.78	1.49		0.723	-0.0197	0.387	-0.924	-1.65
3.46	1.14	-0.708	1.09		1.16	-0.481	-0.567	-0.188	-0.883
3.04	0.839	0.199	0.768		0.676	0.39	0.464	-0.964	-2.27
1.91	0.438	-0.931	0.604		1.41	0.52	-0.0817	-0.36	-1.58
1.95	0.492	-1.08	1.14		0.658	0.549	-0.571	1.08	-1.76
1.88	0.553	-1.09	1.11		0.629	0.156	0.747	-0.166	-1.95
1.74	0.445	-1.37	0.39		1.07	-0.334	-0.362	0.0951	-0.722
1.28	0.152	-0.621	-0.0567		0.737	-0.332	0.354	-0.143	-0.0551
1.8	0.0306	-1.24	1.05		0.495	-0.257	-0.705	1.19	-0.677
2.71	-0.316	-0.746	1.29		0.463	-0.677	-0.274	0.509	-1.87
2.83	-0.154	0.0972	1.51		0.15	-0.197	0.0784	0.262	-1.39
1.29	0.306	-0.046	1.91		0.841	0.143	-0.558	0.282	-1.29
0.931	0.566	0.278	1.29		0.598	-0.126	0.5	0.633	-1.1
0.612	1.1	-0.612	1.27		0.415	0.132	0.616	0.0687	-1.08
0.411	0.66	0.828	1.01		0.475	0.424	1.15	0.2	-0.593
0.496	0.788	0.376	0.184		-0.0262	-0.238	-0.226	-0.576	-0.685
1.33	0.789	0.681	1.19		-0.024	-0.549	2.26	-0.4	-0.513
0.805	0.43	0.241	0.196		0.174	-0.448	-0.208	-0.422	-0.672
1.03	0.308	-0.01	-0.337		-0.0885	0.11	-0.169	-0.201	-1.62
1.36	0.278	-0.414	-0.413		-0.681	1.22	-0.536	-1	-1.36
1.4	0.45	-0.336	-0.128		-0.00725	0.989	-0.322	-0.657	-0.576
1.42	-0.116	-1.65	0.259		0.157	1.13	-0.874	-0.454	-0.0946
1.11	-0.409	-1.07	0.305		0.117	0.547	1.22	-0.969	-0.337
0.082	-0.701	-0.435	0.319		-0.366	0.621	1.05	0.228	-0.575
0.423	-0.8	0.217	0.0734		0.196	0.726	-0.728	-0.581	-0.0861
-0.132	-0.582	-0.42	0.656		0.238	0.566	-0.584	-1.12	0.411
0.184	-0.97	-1.47	0.44		0.285	1.21	-0.452	-0.649	0.723
0.111	-0.817	-0.881	0.609		0.134	1.97	1	-0.246	-1.31
0.535	-0.625	-1.66	0.312		-0.227	1.85	-0.0345	-0.937	-0.339
-0.0847	-0.777	-0.503	0.262		0.772	1.8	0.415	-0.195	-0.141
-0.545	-0.901	-0.169	0.608		0.474	1.8	-0.142	-0.253	-0.199
-0.582	-0.331	0.0791	0.37		-0.0192	1.03	0.651	-0.679	-1.11
-0.463	-0.418	-0.0102	0.647		0.198	0.854	1.34	-0.248	1.29
-0.652	-0.637	-0.1	0.0914		0.0828	1.27	0.321	-0.44	0.739
-1.01	-0.609	-1.59	-0.028		0.366	0.448	-0.545	0.152	0.641
-0.948	-0.13	-1.41	0.495		0.183	0.142	-1.82	-0.587	-0.968
-0.991	0.257	-0.494	-0.102		-0.217	0.448	0.25	-0.793	-1.3
-0.629	-0.176	-0.397	-0.84		-0.474	0.599	-1.29	-0.108	-0.508
-0.428	-0.0498	0.0632	-0.183		0.00466	-0.135	-0.00299	-0.322	-0.874
-0.608	0.232	-0.0288	-0.328		0.0566	0.0892	1.18	-0.41	-1.42
0.0856	0.325	-1.28	-0.334		-0.123	0.306	1.94	-0.158	-0.913
-0.226	0.205	-0.964	-0.96		-0.0268	0.231	1.49	-0.562	-1.07
-0.468	0.0283	-0.392	0.198		0.192	-0.172	0.33	0.00253	-0.644
-0.132	-0.116	-0.908	-0.255		-0.118	-0.185	2.61	-0.364	0.51
-0.188	-0.409	-0.94	0.177		-0.161	-0.427	1.63	0.056	-0.776
-0.853	-0.376	-0.0132	-0.336		-0.188	-0.799	0.564	0.344	-0.88
-0.731	-0.25	-0.278	-0.0176		0.534	-0.568	-0.45	-0.0546	0.59
-0.977	-0.308	-0.841	-0.845		-0.413	-0.992	-0.854	0.382	-1.05
-0.249	-0.421	-0.646	-0.333		-0.741	-0.474	-0.391	0.0544	0.902
-0.788	-0.334	-0.658	-0.432		-0.671	-0.893	0.277	0.215	-0.299
-1.2	-0.361	0.128	-0.438		-0.452	-0.895	1.57	-0.41	0.777
-0.885	-0.608	0.525	-0.203		-0.194	-0.812	1.5	-0.568	-0.144
-1.23	-0.167	0.443	-0.25		0.317	-0.637	1.1	0.126	0.0697
-1.07	-0.585	0.783	-0.597		0.329	-0.964	0.0231	-0.801	-1.23
-1.71	-0.701	-0.0851	-0.0889		-0.598	-0.38	0.839	-0.752	0.111
-1.78	-0.656	-0.347	-0.005		-0.367	-0.809	-0.258	-1.04	-0.917
-1.18	-0.797	-0.593	0.45		-0.182	-0.673	0.086	-0.644	-0.606
-1.86	-1.18	0.0535	0.475		-0.22	-0.896	0.349	-0.519	-0.983
-0.96	-1.02	-0.211	0.31		-0.577	-0.876	-0.0037	-1.56	-1.57
-1.35	-0.702	0.617	0.951		-0.448	-0.813	1.04	-0.994	-0.444
-2.58	-0.878	-0.128	1.48		0.425	-1	1.02	-0.735	-0.747
-0.855	-0.849	-0.586	1.07		0.294	-1.14	-0.835	-1.71	-0.762
-0.276	-0.948	-0.377	1.94		0.261	-1.08	0.278	-0.713	-2.15
0.122	-0.564	-0.0472	1.64		-0.589	-1.16	-0.87	-1.95	0.342
0.828	0.0635	1.1	0.789		-0.604	-1.03	-1.08	-1.03	-0.282
0.781	1.17	0.641	0.902		-0.0758	-1.67	0.239	-1.43	0.409
0.023	2.22	0.615	0.731		0.294	-0.985	-0.0292	-0.475	0.742
-0.214	2.07	0.527	0.657		0.0523	-0.994	0.673	-0.157	-0.401
-0.0164	1.65	0.596	0.909		0.0641	-1.39	-0.342	-0.627	-0.654
-0.354	1.18	0.248	0.806		0.319	-1.19	0.735	-0.23	-1.33
0.269	1.23	0.348	0.992		-0.206	-1.36	-1.37	-0.538	-0.873
-0.12	1	0.324	0.632		-0.32	-0.685	-0.668	-1	-1.71
0.385	0.91	-0.074	0.475		-0.676	-1.17	0.415	-0.436	-0.715
-0.234	-0.0674	-0.812	0.383		-0.85	-1.13	1.04	-0.705	-1.82
-0.314	-0.236	-0.801	-0.692		-0.623	-0.98	0.551	-0.626	-1.16
-0.888	-0.0142	-1.49	-0.12		-0.43	-1.12	0.391	-0.0896	-1.19
-0.647	0.346	0.199	-0.849		-0.676	-0.385	-0.29	-0.68	-0.227
-0.622	-0.0132	0.085	-0.552		-0.124	-0.926	1.81	0.799	-0.574
-0.677	0.404	0.394	-0.281		-0.509	-1.02	-0.393	-0.0515	-1.03
-0.00873	-0.256	-0.0988	-0.342		-0.412	-1.51	0.545	0.968	0.144
-0.278	0.0914	-0.826	-0.145		-0.304	-1.58	0.808	-0.0312	-1.56
-0.249	-0.566	-1.05	0.45		-0.304	-0.867	0.405	1.35	-0.329
-0.349	-0.416	-0.555	0.456		-0.046	-0.243	-1.85	-0.025	-0.838
-1.03	-0.32	-0.0336	0.381		0.0318	-0.35	-0.876	-0.67	-0.894
-1.32	-0.229	-0.364	0.204		0.109	-0.321	-2.3	0.242	-0.973
-1.02	0.0491	0.177	0.329		-0.15	-0.799	-0.262	0.236	-0.572
0.07	0.582	0.503	-0.0563		0.146	-0.992	0.315	-0.339	-0.809
-0.457	1.39	0.942	0.00528		0.418	-1.35	-0.669	-0.961	-0.581
-1.35	1.81	0.777	0.0161		0.432	-1.67	0.0275	-0.306	-1.18
-0.658	1.41	0.339	0.325		0.0835	-1.21	-0.472	-0.779	-0.495
-0.328	1.28	0.562	0.247		-0.432	-1.31	0.248	-0.306	-0.427
0.059	1.45	1.31	0.439		0.28	-1.5	0.282	-0.0678	-0.362
-1.22	1.03	1.49	-0.165		-0.77	-1.56	-0.256	0.725	0.0949
-1.23	1.42	1.44	-0.833		-0.782	-1.33	-0.376	1.06	1.03
-1.3	0.941	0.65	-0.617		-0.195	-1.22	-0.984	0.487	0.0365
-1.02	0.174	0.0492	0.151		-0.497	-1.06	-0.226	0.162	-0.388
-0.797	0.624	-1.01	0.49		-0.571	-0.846	0.361	0.182	-0.398
-0.337	0.859	-0.0287	0.0275		-1.12	-1.32	-1	0.185	-1.41
-0.0196	1.68	0.111	0.154		-0.429	-0.933	0.783	-0.3	-1.37
-0.257	1.67	0.983	-0.509		-0.168	-0.782	0.762	0.515	-1.5
-0.576	1.46	0.936	-0.701		-0.634	-0.964	1.43	0.872	0.701
-0.688	1.12	1.12	-0.574		-0.402	-1.39	-0.846	0.446	0.432
-0.66	0.946	0.133	-0.0231		-0.39	-1.7	0.296	0.822	0.246
-1.4	0.852	0.923	0.287		-0.258	-1.9	-1.27	0.407	0.157
-1.47	1.32	1	0.812		-0.023	-1.77	-0.894	-0.114	-0.0581
-1.15	2.29	1.64	-0.107		-0.335	-1.42	1.16	-0.323	-0.457
-1.63	2.34	1.65	-0.655		-0.235	-0.822	-1.89	-0.517	-0.787
-1.44	1.54	2.31	-1.16		0.473	-0.844	-0.617	-0.452	-0.738
-1.3	1.47	1.97	-0.877		-0.439	-0.682	-0.557	-1.45	-0.456
-0.748	1.67	1.36	-1.24		-0.937	-0.902	-0.935	-2.04	0.546
-0.217	1.91	1.62	-1.53		-0.341	-1.31	-0.0586	-1.61	1.83
-0.149	1.95	1.71	-0.207		-0.638	-0.878	-0.491	-1.55	0.458
-0.473	1.66	0.836	0.0139		-0.66	-0.585	-0.319	-0.174	-0.538
-1.11	1.68	0.53	-0.0516		-0.315	-0.634	-0.509	-1.12	-0.456
-0.817	1.35	1.05	0.75		-0.745	-0.705	-1.9	-0.573	-0.302
-0.737	1.28	0.951	1.73		-0.68	-1.29	-1.27	-0.624	-0.962
-0.852	1.23	0.731	0.729		-0.915	-1.24	-0.936	0.525	-0.767
-0.768	0.809	1.38	0.26		-0.664	-0.892	-1.5	-0.737	-0.479
-0.132	0.804	0.596	-0.0369		-0.496	-0.772	-0.0109	-0.913	0.853
-0.167	1.07	0.633	1.26		-0.742	-1	-1.11	-1.04	0.574
-0.0549	0.736	0.114	1.04		-0.511	-0.317	-0.932	-1.29	-0.41
-0.445	0.964	0.908	1.07		-0.27	0.194	-1.07	-0.87	-1.08
0.0685	1.09	0.104	0.541		-1.2	-0.561	-0.465	-1.05	0.0707
0.858	1.14	0.546	0.123		-1.26	-0.327	0.271	-0.0279	-0.0652
0.745	1.01	0.662	-0.244		-0.708	-0.865	-0.754	-0.622	1.03
0.701	1.59	0.0948	0.375		-1.18	-0.431	0.152	0.883	-0.215
0.35	1.31	0.0348	0.554		-1.21	-0.325	-0.369	-0.47	0.161
-0.726	1.21	-0.0955	0.388		-0.464	-1.06	-0.666	0.455	0.138
-1.26	1.19	0.385	0.34		-0.376	0.163	-0.675	-0.316	0.991
-0.686	1.03	0.595	0.233		-0.938	-0.202	0.00844	-0.231	0.633
-0.845	1.21	0.206	-0.174		-0.222	0.000561	2.77	-0.681	0.215
-0.64	0.452	0.0422	-0.00754		-0.913	0.226	-0.329	-0.444	0.33
-0.37	0.9	-0.0437	-0.612		-1.18	1.89	0.431	0.76	0.294
-0.163	0.931	0.128	-0.5		-0.689	2.01	1.32	1.69	-0.834
0.222	0.588	0.298	-0.0936		-0.92	1.51	-0.167	2.51	0.764
-0.12	0.336	0.281	0.154		-0.639	1.45	-0.462	1.86	-0.326
-0.602	0.46	0.857	-0.195		-0.525	1.26	1.64	0.904	-0.313
0.198	0.286	0.973	-0.691		-0.82	0.908	-1.51	2.62	1.39
-0.661	-0.142	0.288	-0.946		-1.21	1.39	1.32	2.53	0.000373
-0.375	-0.226	-0.202	-1.34		-0.523	1.47	-1.17	1.32	-0.00179
-0.45	0.163	-1.1	-0.303		-0.431	1.94	-0.764	2.39	-1.19
-0.399	0.675	0.659	-0.452		-0.581	1.42	-0.86	2.1	-0.988
-0.573	0.37	0.505	-0.0802		-0.734	2.07	0.312	1.28	0.0488
-0.5	-0.00895	0.275	-0.242		-0.637	1.96	-1.55	2.08	0.164
-0.154	0.0439	-0.0326	-0.311		-1.11	2.32	-1.95	2.93	0.316
-0.182	-0.1	-0.194	-0.135		-0.803	2.46	0.783	2.28	-1.57
-0.324	0.265	0.369	-0.0183		-1.23	1.77	0.677	1.45	-0.572
-0.431	0.119	-0.105	-0.247		-1.16	1.88	1.01	1.91	-1.38
0.166	0.504	0.379	0.701		-0.964	1.36	0.543	1.11	-1.54
-0.379	1.09	0.0804	0.204		-0.59	1.54	1.52	1.33	0.9
-0.482	1.11	-0.299	0.559		-1.03	1.31	-0.125	1.89	-0.965
-0.0149	0.772	0.914	0.0572		-1.1	1.29	0.128	0.74	-0.565
-0.184	0.421	0.214	-0.123		-1.49	1.09	0.112	1.42	-1.48
0.0778	0.601	1.1	-0.171		-0.51	0.848	0.0355	2.19	-0.301
-0.256	0.719	0.809	0.389		-0.833	0.998	-0.562	2.75	0.425
-0.391	0.963	1.83	0.193		-0.816	1.26	-0.832	1.9	1.25
0.136	0.291	1.16	0.554		-0.959	1.68	-0.754	1.64	1.45
-0.357	0.509	1.07	0.225		-1.01	1.99	0.84	2.08	-0.0719
0.409	0.308	0.799	0.0324		-0.16	2.36	-0.349	1.11	0.168
0.239	0.33	1.32	-0.241		-0.678	1.19	0.138	1.48	-0.55
0.785	-0.212	0.894	0.0725		-0.371	1.57	-0.189	1.19	0.118
0.345	0.424	1	0.181		-0.86	2.02	1.47	0.22	0.0759
0.133	0.206	1.28	0.149		-0.501	2.75	0.208	1.08	-1.04
0.443	-0.148	0.602	0.054		-1.01	2.08	0.33	0.767	-0.554
0.327	-0.435	0.309	-0.305		-0.632	1.64	-0.00984	0.847	-0.327
0.67	-0.0693	-0.149	-0.0162		0.0421	1.52	-0.286	0.543	0.273
0.352	0.167	-0.142	0.637		-0.202	1.56	-1.25	0.166	0.499
0.0595	0.351	-0.394	0.148		-0.807	1.6	0.843	0.355	-0.433
0.124	0.165	-0.743	-0.237		-0.105	1.69	0.283	0.502	1.91
-0.391	-0.137	-0.268	0.668		0.64	1.71	1.02	0.672	0.706
0.134	-0.36	-0.495	0.39		-0.0557	1.57	0.341	0.0845	-0.195
0.459	0.467	0.275	0.239		-0.38	1.55	0.653	0.33	-0.222
0.441	0.666	-0.756	-0.608		-0.263	1.31	0.611	0.229	0.0782
-0.509	0.448	-0.574	-0.465		-0.518	0.718	-0.259	0.0354	0.255
-0.704	0.282	-0.738	0.112		-0.535	1.16	0.0833	0.863	0.155
-1.18	0.144	-0.662	0.548		-0.0328	1	1.17	0.261	0.77
-0.848	-0.141	-1.27	0.481		-0.629	0.517	-0.486	0.091	-0.468
-0.855	-0.0125	-0.341	0.422		-0.37	1.05	-1.02	-0.157	1.18
-0.447	-0.197	-0.494	0.313		-0.491	0.768	-2.06	0.572	-0.0792
0.169	0.181	-0.0794	0.265		-0.545	0.39	-1.94	0.402	0.933
0.801	0.0869	0.802	0.51		-0.247	0.337	0.154	-0.342	0.589
0.354	0.13	-0.0935	0.364		-0.998	0.806	0.621	-0.528	1.22
0.79	-0.327	-0.28	0.716		-0.225	0.491	-1.17	1.3	-0.845
0.27	-0.964	-0.0134	0.746		-0.0778	1.23	-1.43	0.383	0.706
-0.278	-0.212	0.0489	1.05		-0.552	1.37	-1.03	0.0986	-1.12
0.289	-0.12	0.456	0.795		-1.08	1.27	-0.113	-0.0077	0.343
0.0768	-0.126	-0.29	-0.168		-0.887	0.938	-0.386	-0.282	1.2
-0.239	-0.289	-0.0762	0.467		-1.04	0.308	-0.419	-0.0773	0.23
0.114	0.126	-1.06	0.129		-1.48	0.47	-1.42	-0.369	-0.431
0.122	-0.0623	-0.148	0.386		-0.799	0.297	-0.815	0.415	0.113
-0.338	-0.178	-0.368	0.416		-0.4	0.825	-0.614	0.0731	-0.858
-0.495	-0.912	-1.46	-0.0451		-0.365	0.604	0.0301	-0.426	-0.138
-0.796	-0.859	-0.81	0.236		-0.811	1.48	-0.886	0.576	0.0881
-0.074	-0.894	-0.409	1.93		-0.864	2.09	-1.89	-0.244	1.4
-0.119	-1.03	-0.901	2.72		-0.67	2.19	-1.89	-0.47	-1.01
-1.02	-0.765	-0.85	3.04		-0.472	1.7	-1.41	0.677	0.484
-0.87	-0.0358	-0.732	2.99		-0.481	1.68	-1.12	0.715	0.769
-1.47	0.181	-0.372	2.59		-0.419	1.69	-0.215	0.243	0.832
-1.23	0.232	0.903	2.46		-0.713	1.43	0.481	-0.29	-0.203
-1.44	-0.036	1.21	2.58		-0.226	1.34	0.217	0.557	1.35
-1.4	-0.581	1.53	1.77		0.156	0.815	-0.866	0.231	-0.529
-1.68	-0.801	0.928	1.6		-0.554	0.645	-0.546	-0.706	-0.0473
-0.894	-1.1	0.178	1.47		0.0404	1.25	-1.58	0.0219	-1.59
-0.928	-0.698	-0.0308	2.18		0.0324	0.732	-0.0882	0.292	-0.476
-0.387	-0.738	0.847	1.43		0.64	1.24	0.0687	-0.543	0.0686
-0.971	-1.41	1.44	0.726		-0.316	0.814	-1.42	0.699	-0.39
-1.09	-1.38	0.536	1.24		-0.422	0.735	0.656	1.85	-0.78
-0.915	-1.54	0.928	0.928		-0.702	1.23	-0.789	1.29	-0.698
-1.11	-1.33	0.933	1.35		0.283	0.954	0.731	0.733	-0.629
-0.599	-0.709	0.153	1.66		-0.639	0.486	-0.0402	0.526	-0.142
-1.17	-0.894	0.208	1.56		-0.996	0.421	-1.83	0.19	1.31
-0.919	-1.03	1.22	1.98		-0.55	0.416	-1.5	0.992	1.76
-1.06	-0.901	0.337	1.66		-0.753	0.00245	-1.1	0.481	1.84
-0.975	-0.811	0.75	0.765		-0.264	0.216	-1.17	0.044	0.34
-0.964	-1.2	0.739	1.58		-0.319	0.376	-0.834	0.438	0.433
-1.29	-1.44	-0.22	1.17		-0.275	0.272	-1.79	1.02	0.0698
-0.357	-0.96	0.0348	1		-0.759	0.332	-1.2	0.237	0.417
-0.378	-1.05	-0.189	1.03		-0.203	0.412	0.195	0.202	-0.468
-1.03	-0.888	0.152	0.509		-0.0764	-0.11	-2	0.388	-0.374
-1.2	-0.853	0.153	0.662		-0.185	0.297	0.125	0.418	0.00285
-0.191	-0.426	0.752	0.401		0.805	0.391	-1.83	-0.419	0.705
-0.164	-0.521	0.0671	0.935		1.33	0.138	-1.19	0.95	0.72
-0.00111	-0.347	-0.324	0.406		0.806	1.4	0.203	-0.208	-0.642
0.142	-0.716	-0.315	0.0846		1.31	2.37	-1.44	0.0819	0.184
-0.574	-1.23	0.326	0.846		1.07	2.16	-0.464	0.0776	0.302
-1.42	-1.23	-0.135	0.805		1.47	1.77	0.00585	0.485	-0.285
-1.62	-1.48	-0.445	0.461		0.443	1.67	0.62	-0.181	-0.163
-1.42	-1.09	0.85	0.687		0.716	1.7	-1.56	0.00809	0.911
-1.05	-1.11	-0.451	0.742		-0.45	1.17	0.202	-1.09	-0.31
-1.3	-0.993	0.403	1.82		0.637	1.64	-0.408	-0.45	-0.523
-0.845	-1.47	-0.0864	1.97		0.126	0.971	-0.45	-0.88	-0.312
-0.505	-1.63	0.00562	2.45		0.202	1.17	-0.147	-0.461	-0.951
-0.861	-1.82	-0.388	4.14		0.368	1.49	-1.8	-0.122	-0.437
-0.775	-1.09	0.0999	3.96		0.535	1.26	-0.944	0.517	-1.33
0.2	-1.13	-0.041	3.64		0.76	1.06	-0.307	-0.617	-1.72
-0.472	-1.41	-0.0455	3.63		0.293	0.946	-0.618	-0.432	0.654
-0.0422	-0.585	-0.515	2.53		0.442	1.37	0.198	-1.35	-0.795
-0.495	-0.719	0.543	3.65		0.235	0.561	-1.22	-1.41	-0.123
-0.0571	-0.963	0.413	3.31		-0.0957	0.653	0.909	-1.27	0.288
-0.0562	-0.86	0.183	3.12		-0.727	0.729	-0.755	-0.805	0.295
-0.141	-0.933	0.665	3.44		0.514	0.485	0.133	-0.39	-0.717
0.0226	-1.4	-0.151	4.58		0.348	-0.128	-1.18	-1.09	-0.384
-0.463	-1.37	-0.717	5.87		0.135	0.631	-0.739	-1.44	-0.462
0.0904	-1.22	-0.499	5.72		0.0462	0.689	-1.32	-0.373	-0.108
-0.439	-0.807	-1.11	5.79		-0.148	0.27	-0.268	-1.56	-0.613
-0.368	-0.995	-0.699	4.89		-0.573	0.63	-0.00648	-1.24	-1.04
0.0204	-0.622	-0.385	4.96		-0.15	0.181	-1.45	-0.829	-1.25
0.799	-1.02	-0.756	4.66		0.466	-0.363	0.0322	-0.773	-0.00825
1.15	-1.11	0.711	4.58		-0.503	0.171	-0.46	-0.227	-0.352
0.658	-0.912	2.46	3.88		-0.225	-0.228	0.225	-0.163	2
0.688	-1.15	2.91	3.82		0.0395	0.0188	-1.13	-1.36	0.398
0.962	-1.34	2.19	2.98		-0.144	-0.254	-0.459	0.228	-0.332
1.07	-1.12	2.36	2.45		0.0438	-0.467	-1	-1.07	0.371
1.7	-1.33	2.1	2.93		-0.417	-0.552	1.02	-0.411	-1.4
1.14	-1.31	2.28	1.98		-1.03	-0.578	-0.428	0.324	-0.731
0.629	-1.01	1.02	1.85		-0.297	-0.541	-1.53	0.351	-1.27
0.488	-1.51	1.45	1.45		0.0739	-0.387	-1.52	-0.158	-0.102
0.247	-1.2	1.72	1.6		-0.567	-0.492	-1.97	2.3	0.173
-0.181	-1.47	0.534	1.28		-0.431	-0.564	0.408	1.92	-0.448
0.0553	-1.43	0.676	0.836		-0.144	-0.422	-1.98	0.527	-1.3
-0.159	-1.56	0.981	0.791		-0.722	-0.803	0.287	0.768	0.355
-0.318	-1.45	0.649	0.79		-0.575	-1.15	-1.22	0.783	-1.19
-0.45	-1.69	0.47	1.18		0.173	-0.896	0.3	1.88	-0.186
-0.459	-0.969	0.46	1.39		-0.178	-1.19	-0.303	0.661	-1.43
-0.287	-0.634	1.06	1.85		-0.751	-1.28	-0.606	0.00424	-1.23
-0.282	-1.15	0.772	1.99		-0.625	-1.24	-2.11	-0.235	-1.29
0.182	-0.893	0.678	1.93		-0.0443	-0.661	-1.95	-0.916	-0.0949
0.0379	-1.32	0.68	1.05		0.0249	-0.507	-0.982	-0.211	-0.995
0.0938	-1.38	0.233	1.84		0.245	-0.425	-1.2	-0.415	0.174
0.244	-1.77	0.476	1.77		0.0847	-0.894	-1.89	-0.599	-1.17
-0.498	-1.69	0.0599	1.58		0.0264	-0.514	-2.29	0.239	-1.7
-0.242	-1.68	0.133	2.26		-0.266	-0.774	0.215	0.426	-1.4
-0.369	-1.75	-1.32	2.13		0.0634	-0.99	-0.0564	-0.801	-0.721
0.236	-2.08	-0.619	1.56		0.0227	-0.834	0.3	0.153	-1.28
-0.122	-2.06	0.178	2		-0.199	-0.729	-0.536	0.42	-1.29
0.319	-1.94	0.32	1.98		-0.0141	-1.33	-1.1	0.42	-0.83
0.321	-1.59	0.777	1.49		-0.7	-1.27	-0.876	0.54	-0.0631
0.523	-1.34	0.839	1.3		-0.882	-1.11	0.0525	1.26	-1.17
0.323	-1.45	0.761	1.8		-0.184	-1.34	-1.32	0.709	-1.09
-0.296	-1.18	0.325	0.854		-0.204	-1.08	-0.141	0.879	-0.581
-0.974	-0.896	0.401	0.884		-0.0207	-1.1	0.688	0.812	-0.795
0.0915	-0.797	1.16	1.13		-1.03	-0.417	-0.0996	0.58	-1.21
-0.286	-0.744	1.02	0.728		-1.07	-0.879	0.738	0.717	-0.593
0.197	-0.89	0.445	0.29		-0.789	-0.559	-0.264	0.476	-0.752
0.156	-1.07	0.504	0.635		-0.984	-0.921	1.26	0.0462	0.619
0.477	-1.44	0.0884	0.821		-0.625	-1.21	1.25	0.698	-0.742
0.158	-1.12	-0.539	-0.267		-1.06	-1.27	0.405	0.924	-1.22
-0.418	-0.835	-0.276	0.27		-1.03	-1.38	0.521	0.776	-1.04
-0.512	-0.986	-0.23	0.506		-1.64	-0.862	0.147	1.37	-0.591
-0.486	-1.22	-1.3	0.73		-1.47	-0.686	1.05	0.902	-1.49
-1.01	-0.94	-1.38	-0.12		-1.22	-0.273	-0.592	0.704	-1
-0.78	-0.86	-0.755	1.13		-0.982	-0.949	-0.704	0.257	-1.14
-0.706	-1.16	-0.756	1.26		-0.559	-1.12	-0.336	-0.168	-0.312
-0.626	-0.936	-0.603	0.983		-1.18	-1.24	-1.65	0.2	-0.72
-0.434	-0.893	0.327	0.907		-0.616	-1.27	-1.27	0.0378	-0.62
-0.262	-0.832	0.822	0.675		-0.85	-0.111	-1.19	0.0703	-0.5
-0.694	-0.788	0.874	1.2		-1.24	0.00685	0.855	0.542	-1.01
0.257	-0.419	0.362	0.897		-0.8	-0.145	-0.6	-0.497	0.178
0.531	-0.272	0.975	1.44		-1.53	-0.429	-0.519	-0.259	-1.96
0.366	-0.261	0.711	1.48		-1.37	-0.511	-0.246	-0.419	-0.794
0.256	-0.0664	0.553	1.68		-0.999	-1.02	-0.525	-0.426	-0.054
0.137	-0.377	-0.0874	1.56		-0.809	-1.22	-0.811	0.00103	-0.471
0.0271	-0.295	-0.6	1.48		-1.75	-0.51	-0.915	-0.275	-0.414
-0.373	-0.152	-0.568	0.804		-1.07	-0.709	-0.649	-0.935	0.101
0.0559	-0.232	-1.78	1.1		-1.6	-0.73	-0.361	-0.76	-1.31
0.263	-0.521	-1.19	1.87		-0.828	-0.555	0.187	-1.16	0.521
0.245	-0.816	-1.03	1.72		-1.53	-0.424	-0.177	-0.454	-0.525
0.576	-0.242	-0.181	1.66		-1.92	-1.05	-0.0307	-0.325	-1.01
0.591	-0.26	0.0997	0.701		-1.51	-0.762	1.51	-0.517	-0.0797
0.335	-0.536	0.0143	-0.227		-1.23	-1.07	0.199	-0.464	-1.02
0.0366	-0.514	-0.262	-0.218		-1.24	-1.13	0.0651	-0.169	-0.0781
0.349	-0.331	0.0111	0.564		-1.32	-0.815	-1.07	-0.774	-0.137
0.845	-0.223	0.583	0.88		-1.45	-1.27	-1.35	-0.755	0.143
1.17	-0.0199	2.32	0.596		-1.14	-1.57	0.319	-0.546	-0.163
0.885	0.0677	2.83	-0.024		0.0787	-1.08	-1.06	-0.438	0.6
0.601	-0.0283	2.9	-0.399		-0.908	-1.29	-0.306	0.741	-0.377
0.746	0.0801	2.55	-0.26		-0.829	-1.6	-0.426	-0.031	-0.376
0.78	-0.185	2.71	0.0683		-0.611	-2	-0.396	-0.291	-1.48
0.844	0.124	1.35	-0.273		-0.399	-1.72	-1.31	0.203	-2.12
0.685	-0.0737	1.05	-0.857		-1.52	-1.74	-0.559	0.423	-1.29
0.771	0.0543	1.1	-0.0695		-1.47	-1.62	-0.653	-0.0646	-2.33
0.61	-0.16	1.23	-0.474		-0.671	-1.65	0.1	-0.544	-2.21
1.2	0.33	1.04	0.214		-0.0876	-1.12	-0.438	0.741	-2.33
0.283	-0.0392	0.599	-0.403		0.35	-0.585	-2.24	0.586	-1.88
-0.145	0.127	0.203	-0.0508		0.622	0.022	-1.08	0.868	-0.985
-0.437	-0.452	-0.00714	-0.107		0.102	0.351	1.28	0.0304	-0.0571
-1.02	-0.144	-0.517	0.323		-0.214	-0.317	-1.11	0.537	-0.866
-0.68	-0.408	-0.338	0.226		-0.853	-0.706	-0.739	-0.141	-1.7
-1.26	-0.511	-0.235	-0.557		-1.18	-0.208	-0.869	1.05	-1.69
-0.917	-0.349	-0.231	-0.577		-1.17	-0.254	0.0407	0.49	-0.025
-0.513	-0.56	-0.219	-0.856		-0.958	-0.032	-1.16	0.364	-1.26
-1.14	-1.18	-0.377	-0.67		-0.274	-0.476	-1.03	0.596	0.398
-1.05	-1.37	-0.0654	0.121		-0.637	-0.638	-0.421	0.484	-0.873
-0.269	-1.25	0.062	-0.0498		-0.709	-0.835	-0.0744	0.7	-1.03
0.28	-1.62	0.503	0.141		-0.52	-0.779	0.165	0.445	-0.347
0.736	-1.64	0.137	0.234		-0.293	-0.974	0.259	1.17	-2.41
1.47	-1.57	0.757	-0.992		-0.69	-0.812	-0.365	1.36	-1.05
1.41	-1.43	0.475	-1.2		-0.62	-0.9	0.877	2.21	-0.756
-0.297	-1.16	0.143	-0.941		-1.11	-0.819	-0.608	1.51	-1.55
0.152	-0.93	0.0485	-1.15		-1.07	-0.511	-0.182	1.56	-1.03
-0.33	-0.59	0.403	-1.07		-1.23	-0.681	-1.12	1.55	-0.59
-0.264	-0.589	0.058	-1.22		-1.24	-1.85	-1.34	2	-0.178
-0.0663	-0.53	0.805	-0.236		-0.87	-1.33	0.341	1.75	0.29
0.507	-0.112	0.132	-0.738		1.05	-1.85	-0.968	0.608	0.674
-0.408	0.177	-0.5	-0.39		0.799	-0.831	0.638	1.3	-0.295
0.363	-0.0842	-0.0784	-0.618		1.33	-1.1	0.843	1.93	-0.621
0.463	-0.364	-0.267	-0.0688		1.02	-1.25	-0.938	1.05	0.287
0.507	-0.846	-0.872	0.228		0.493	-1.75	0.592	0.799	-0.549
0.485	-0.585	-1.36	-0.0204		0.641	-0.979	1.03	1.21	0.393
-0.296	-0.871	-0.879	-0.858		0.587	-0.788	-0.0742	1.68	-0.818
-0.0502	-1.28	-0.307	-0.717		0.191	-0.637	0.82	2.3	-0.912
-0.0917	-1.06	-0.46	-0.837		0.0871	-0.991	-1.24	0.972	0.334
-0.139	-1.49	-0.735	-0.0452		-0.236	-1.22	1.07	0.857	0.872
-0.52	-1.38	-0.596	0.0937		0.0719	-1.12	-0.487	-0.00548	-0.694
-1.03	-1.49	0.211	0.0874		-0.346	-1.09	-0.987	1.91	-0.434
-0.489	-1.69	-0.291	0.65		-0.247	-1.32	-1.6	1.87	-1.86
0.232	-0.821	-0.0961	0.326		-0.415	-1.15	-0.738	0.981	-1.9
0.315	-0.619	-0.389	-0.63		-0.0191	-1.43	0.14	0.703	-1.12
0.206	-0.413	1.02	0.0805		0.279	-0.714	-0.349	1.21	-0.765
-0.436	-0.295	0.522	0.0939		0.236	-0.824	1.16	1.45	-1.62
0.0103	-0.504	0.674	-0.184		-0.507	-0.829	-0.389	1.18	-0.294
-0.444	-0.798	0.825	0.392		-0.717	-1.2	0.0172	1.25	0.519
-1.35	-1.09	1.94	0.0166		-0.862	-1.43	-0.605	0.962	0.481
-1.54	-0.865	3.66	-0.0965		0.0931	-1.83	0.0271	1.89	-0.355
-0.18	-0.559	3.36	0.0972		0.0333	-1.49	1.29	0.269	-0.944
-0.449	-0.245	3.1	-1.22		-0.311	-1.51	0.614	-0.128	0.0616
-0.549	-0.704	3.7	-0.877		-0.175	-1.78	-0.164	0.927	-0.117
-0.85	-0.775	3.55	-0.681		-0.131	-1.16	0.938	1.42	-0.744
-0.359	-0.626	3.24	-0.432		-0.581	-1.13	0.105	1.77	-1.64
-0.0668	-0.724	3.28	-0.156		-0.196	-1.87	-1.03	0.635	0.15
-0.533	-1.38	2.14	-0.748		-1.08	-1.95	-0.018	1.41	-1.07
-0.324	-0.672	2.46	-0.498		-0.174	-1.47	-1.15	1.06	-0.191
0.0331	-0.778	2.06	-0.561		-1.09	-1.33	-0.476	1	-1.05
-0.615	-0.569	1.66	-0.162		-0.805	-1.15	2.01	0.263	-1.28
-0.134	-0.614	1.88	-0.233		-0.552	-1.3	-0.91	0.353	-1.04
0.471	-0.701	2.06	0.368		-0.0147	-1.4	-1.05	0.85	-1.67
-0.144	-0.695	1.35	0.242		-0.599	-1.51	-0.366	0.716	-1.85
-0.0457	-0.868	1.69	1.15		-0.768	-1.27	1.72	0.447	-1.82
-0.0543	-0.61	1.12	0.957		-0.817	-1.6	0.134	-0.0328	-0.497
-0.254	-0.609	1.54	0.452		-0.96	-1.62	-0.705	-0.172	-1.76
-0.922	0.113	1.31	0.311		-0.309	-1.82	-0.176	-0.231	0.265
-0.566	0.0478	1.17	0.375		-0.358	-1.68	0.932	0.264	-1.37
-1.16	0.107	1.2	0.386		-0.461	-1.74	-0.132	-0.498	-0.181
-0.674	-0.0702	1.17	0.409		-0.854	-1.71	0.42	0.149	0.0578
-0.652	0.179	1.11	0.216		-0.449	-1.92	-0.775	0.169	-1.47
-0.232	-0.275	-0.265	0.42		-0.061	-1.88	-0.192	-0.144	-1.56
-0.5	-0.493	0.216	0.379		-0.426	-1.88	0.437	0.59	-1.3
0.133	-0.3	1.52	0.284		-0.653	-1.84	0.265	-0.145	-1.56
0.0572	-0.813	0.507	-0.467		-0.364	-1.58	0.322	-0.61	-1.08
0.765	-0.524	0.336	-0.682		-0.231	-1.85	0.659	0.272	0.34
0.494	-0.907	0.502	-1.1		0.279	-1.77	0.266	0.312	0.699
0.394	-1.07	-0.0178	-0.87		-0.212	-1.39	0.0245	0.201	-0.362
0.137	-1.44	0.421	-0.818		0.388	-1.78	0.203	-0.761	-0.62
0.251	-1.3	0.674	-0.612		0.0136	-2.38	0.608	-0.0777	-0.735
0.377	-1.11	0.195	-1.07		0.0656	-1.53	-0.678	0.0558	-0.638
-0.185	-1	0.295	-0.746		0.34	-1.4	-1.26	-0.595	-0.42
-0.201	-0.729	0.274	-0.452		-0.412	-1.64	-1.06	0.435	-0.457
-0.753	-0.736	0.535	0.453		-0.542	-1.78	-0.306	-0.549	-0.0148
-0.394	-0.744	0.423	0.369		-0.107	-1.3	-0.145	0.206	-0.994
0.0254	-0.916	-1.15	0.166		-0.318	-1.2	-0.192	-0.597	-0.739
0.538	-1.04	-1.11	1.11		-0.118	-1.74	0.198	-1.21	-0.263
0.958	-1	-1.08	-0.162		-0.51	-1.41	-0.507	-0.738	0.373
0.605	-0.552	-0.742	-1.14		0.452	-1.79	0.423	-0.347	-0.698
0.234	-0.765	-0.423	-1.07		0.962	-1.65	0.378	0.194	-0.557
-0.526	-0.856	-0.0506	-1.3		0.575	-2	-1.44	0.172	0.494
0.292	-0.533	0.449	-0.742		1.19	-1.74	-0.859	-0.409	-1.19
0.676	-0.445	0.42	-0.337		0.699	-1.82	-2.17	-1.02	-1.28
0.92	-0.0214	0.605	-0.225		0.111	-2.23	-1.01	-0.462	-1.66
-0.107	1.11	0.599	-0.955		0.344	-1.6	-1.05	-0.787	-1.25
0.0806	1.01	0.436	-0.997		0.256	-1.85	-0.745	-1.27	-0.969
0.272	0.938	0.422	-0.605		0.348	-1.53	0.169	-0.896	-1.83
-0.061	1.12	0.203	-0.244		0.403	-1.68	-1.27	-1.07	-1.05
0.638	0.989	0.261	-0.232		0.416	-1.29	-2.14	0.0312	-1.24
1.33	0.349	-0.318	0.589		-0.0512	-1.16	-1.68	-0.611	-1.48
0.532	0.972	-0.233	0.198		-0.36	-1.61	-2.1	-1.67	-1.39
0.809	0.495	-0.731	-0.68		-0.261	-1.76	-1.64	-0.0958	-1.39
0.283	0.765	-0.459	-1.59		0.429	-1.67	-0.214	-0.313	-0.512
0.222	0.512	-0.359	-1.06		-0.195	-1.06	-1.32	0.0811	0.0315
0.549	0.872	0.0152	0.591		-0.267	-1.33	-1.28	0.961	-0.589
0.577	1.55	-0.213	0.489		-0.244	-1.21	-0.685	-0.0251	-2.28
-0.111	2.49	-0.159	0.27		-0.332	-0.928	-1.15	-0.44	-1.63
-0.456	2.34	-0.187	0.415		-0.657	-0.148	-1.4	-1.17	0.346
-0.794	2.02	-0.0613	-0.25		-0.369	-0.0397	-1.8	-0.215	0.415
-1.06	2.17	0.188	0.52		-0.0155	-0.532	-0.597	-0.967	-1.47
-0.827	3.12	0.0912	0.00568		-0.266	-1.18	-0.769	-0.77	-0.295
-0.0821	2.62	-1.36	-0.241		-0.0865	-0.731	-2.11	-0.528	-0.639
0.0115	2.49	-1.4	-0.437		-0.265	-0.91	-1.06	-1.67	-0.183
-0.635	2.05	-1.82	-0.042		-0.626	-1.53	-0.435	-0.561	-1.3
-0.248	1.94	-1.91	0.058		-0.34	-1.28	-0.345	-1.05	1.02
0.412	1.46	-0.981	-0.432		0.0292	-1.3	-0.323	-0.293	-1.13
-0.821	1.65	-0.302	-0.286		-0.83	-1.43	-0.277	-0.911	-0.19
-1.43	1.44	-0.609	0.173		-1.37	-1.3	-0.649	-1.01	0.491
-1.44	1.07	-0.111	0.443		-0.899	-0.522	-0.442	-1.07	1.38
-0.514	1.4	-0.111	1.23		-0.932	-0.328	-0.489	-0.151	0.32
-0.986	0.784	0.363	0.74		-0.826	-0.396	-0.448	-0.346	0.81
-1.35	1.24	-0.0277	0.923		-0.029	-0.6	0.628	-0.62	1.3
-1.19	1.66	0.123	0.861		0.575	-0.45	-0.58	0.295	0.966
-0.368	1.44	0.625	0.84		0.718	-0.105	0.166	-1.84	0.181
-0.635	1.51	1.29	0.656		0.134	-0.235	-0.191	0.247	-0.238
-0.943	1.63	0.769	0.153		-0.0648	-0.827	1.38	-0.886	0.751
-1.22	1.64	0.949	0.816		-0.227	-1.56	1.99	-0.593	0.499
-0.052	1.28	0.52	0.504		-0.497	-0.705	0.445	-2.35	0.507
0.211	0.777	0.303	0.565		-0.221	-0.573	-0.34	-0.995	0.666
-0.468	0.951	-0.0309	-0.24		0.361	-0.715	0.272	-1.95	0.509
0.61	1.17	0.324	0.589		0.0107	-0.652	0.324	-1.22	0.478
-0.0044	0.732	0.0817	0.47		-0.288	-0.939	-1.32	-0.374	-0.936
-0.617	0.586	0.979	-0.283		-0.146	-1.57	-0.0311	-0.574	-0.612
-0.95	0.51	0.471	0.135		0.736	-0.793	0.49	-0.617	-1.01
-0.805	0.627	-0.0147	-1.11		0.508	-1.56	1.29	-0.939	-0.344
-0.915	0.501	-0.232	-0.77		0.906	-1.8	0.113	0.195	-0.122
-0.36	0.333	-1.2	-0.755		0.842	-1.43	1.4	-0.989	0.345
0.197	0.252	-0.0425	-0.568		0.583	-1.71	-1.08	-0.467	-0.721
-0.249	0.566	-0.992	-1.01		0.243	-1.69	-0.971	-0.367	-1.44
-0.244	1.06	-0.474	-0.612		0.756	-1.47	0.3	-0.0863	-0.74
-0.508	1.22	0.712	-0.39		1.82	-1.32	-0.867	0.247	-1.22
-1.09	1.3	1.59	-0.0899		1.22	-1.15	1.34	0.263	0.477
-0.68	0.987	2.38	-0.0742		0.92	-1.9	0.119	0.716	-0.0914
0.00373	1.21	2.41	-0.387		1.08	-1	0.434	0.326	0.927
0.165	1.3	2.43	0.516		0.784	-0.464	-0.55	0.368	-0.0714
0.103	1.38	1.97	0.516		0.791	-1.02	-0.524	0.146	-0.682
0.123	0.422	1.8	0.856		0.446	-1.18	-0.891	-0.229	-0.585
-0.534	0.857	2.16	0.833		0.977	-1.62	-0.65	0.573	0.129
-1.26	0.689	1.93	1.44		0.132	-1.32	-1.15	0.895	1.03
-1.32	0.715	1.52	0.373		0.566	-1.39	-0.124	0.617	-1.34
-1	0.909	1.47	0.869		-0.0772	-1.49	-1.08	-0.818	-0.346
-0.69	0.97	0.989	0.634		-0.421	-1.57	-2.16	-0.204	0.16
0.327	0.933	0.286	0.411		0.363	-1.14	-1.19	-0.0173	0.00678
0.482	0.562	0.124	0.603		-0.695	-1.09	-0.728	0.962	0.438
-0.156	0.105	0.795	-0.266		-0.124	-0.617	1.11	-0.0548	0.904
-0.634	-0.157	0.77	-0.132		-0.087	-1.09	1.38	-0.59	0.587
-0.658	-0.191	0.218	0.519		0.115	-1.13	-0.567	0.132	0.853
0.887	0.313	-0.717	0.397		0.00437	-0.768	-0.494	0.0978	0.42
1.23	-0.143	-0.859	0.234		-0.324	-0.578	-0.563	0.475	-0.249
1.33	0.0691	-0.919	0.0797		0.386	-0.837	-1.17	0.456	0.287
0.706	0.044	-0.147	-0.0698		0.579	-1.37	-0.354	0.418	-1.51
0.639	0.0221	-0.00798	0.215		0.105	-0.652	-0.992	0.18	0.106
-0.119	0.0551	-0.233	0.102		-0.166	-1.16	-0.305	-0.0834	-1.52
-0.325	-0.707	-0.423	0.683		-0.766	-1.04	-1.92	0.0364	0.0685
-0.0313	-0.604	-0.0485	1.43		-0.52	-1.29	0.325	0.509	-0.324
0.21	-0.597	-0.548	1.3		-0.179	-0.862	0.0622	-0.0695	0.262
0.0913	-0.935	-0.34	1.09		0.0648	-1.04	-2.15	0.421	0.789
0.341	-0.193	0.243	0.645		0.832	-1.07	-2.09	1.24	-0.191
0.618	-0.961	0.836	1.32		0.897	-0.749	-0.823	0.69	0.704
0.402	-0.926	0.208	0.932		0.704	-0.378	-2.33	0.637	0.822
-0.0653	-1.36	0.576	0.256		0.324	-0.274	-0.982	1.34	-0.531
0.433	-0.699	0.236	1.02		0.633	-0.097	-1.91	1.25	-0.462
1.13	-0.817	-0.526	0.708		-0.0396	-0.0838	-1.48	0.461	-0.812
1.11	-0.794	-0.661	1.32		0.228	-0.319	-1.88	0.897	-0.537
1.22	-0.919	0.605	0.595		0.403	-0.986	-0.279	1.21	0.401
1.19	-0.722	0.0324	0.456		0.278	-0.494	-2.17	1.47	0.259
1.13	-0.859	-0.59	0.0934		0.29	-0.441	-1.4	0.695	-0.0354
0.396	-0.641	0.444	-0.467		0.438	-0.55	-0.576	0.187	0.105
0.209	-0.464	0.0589	-0.462		-0.223	-0.454	-1.08	-1.14	-0.0645
0.0678	-0.535	0.0572	-1.24		0.13	-0.24	-0.507	-0.0569	0.319
0.246	-0.424	0.983	-1.34		-0.381	-0.193	-2	-0.667	0.293
0.573	-0.708	0.366	-0.889		0.0594	-0.0931	-2.72	-0.46	0.0293
0.339	-0.682	0.397	-1.24		-0.207	-0.448	-1.81	-0.824	0.0382
0.225	-0.732	0.597	-1.08		0.161	-0.88	-2.02	-0.406	-0.139
-0.593	-0.85	0.457	-0.883		0.867	-1.28	-1.2	0.217	-1.02
-0.0615	-0.626	-0.332	-0.78		-0.0793	-1.06	-1.2	0.29	0.688
-0.561	-0.442	0.918	-0.455		0.588	-0.593	-0.557	0.143	-0.582
-0.36	-0.931	1.79	-1.74		0.168	-0.0185	-1.04	0.992	-0.0889
-0.156	-0.346	1.35	-0.926		-0.275	-1.04	-1.13	2.67	0.065
0.0382	-0.278	0.643	-0.517		0.305	-1.07	-1.66	2.55	0.358
0.0549	0.0407	0.803	0.406		-0.42	-0.616	-0.465	3.27	-0.562
-0.457	0.159	0.0499	0.316		0.104	-1	-0.878	2.73	0.103
-0.268	1.2	0.567	0.298		-0.61	-0.225	-0.924	1.82	-0.0346
0.0901	1.32	0.081	0.0749		0.211	-0.25	-1.75	1.68	-0.463
0.343	1.1	0.0614	0.219		0.0841	-0.522	-2.25	1.12	-1.02
-0.233	0.888	0.441	-0.144		-0.298	-1.03	-0.87	0.981	-0.909
-0.304	0.754	1.12	-0.0108		-0.111	-0.781	0.493	1.29	-0.197
0.305	0.982	1.43	-0.00759		0.159	-1.39	0.223	0.0313	-1.62
-0.721	0.3	-0.0567	0.239		-0.552	-1.25	-2.16	0.702	-1.24
-1.38	-0.168	0.912	0.479		-0.137	-1.1	-0.938	0.241	-0.853
-0.238	-0.217	0.816	0.705		-0.474	-1.17	-0.341	0.192	-0.625
-0.458	0.107	0.712	-0.0159		-0.697	-1.22	0.468	0.777	-0.0539
-0.964	-0.124	0.896	-0.0187		-0.116	-1.43	-0.297	0.73	0.59
-0.904	-0.697	1.14	-0.18		-0.191	-1.38	-0.727	1.08	-0.838
-1.01	-0.608	0.577	-0.928		-0.879	-1.43	-0.648	0.98	-0.411
-0.89	-0.544	1.25	0.364		0.0141	-0.639	-0.503	-0.358	-0.482
-0.603	-0.498	0.414	0.551		-0.371	-0.923	-0.642	0.323	-1.98
-0.726	-0.877	1.24	0.264		-0.311	-1.12	-1.66	-0.203	0.09
-0.00873	-0.523	1.95	0.245		-0.208	-1.12	-1.84	0.376	0.517
0.361	-0.653	1.2	0.0867		-0.58	-0.567	-1.15	-0.446	0.625
0.73	-0.385	0.577	-0.453		-0.889	-0.632	-1.86	-0.497	-0.221
1.74	-0.453	1.04	0.148		-0.683	-0.707	-1.66	-0.0454	-0.833
1.61	-1.15	0.216	-0.224		-0.646	-1.32	-2.14	-0.784	-0.641
2.66	-1.24	0.336	0.29		-0.511	-1.08	-0.472	-0.726	-0.645
2.8	-1.44	-0.451	-0.044		-0.13	-0.927	0.111	-0.559	-0.138
3.8	-1.39	0.114	0.308		-0.166	-0.625	-1.28	-0.429	-0.0417
4.51	-1.49	-0.0644	0.319		-0.331	-0.865	-0.577	-0.248	0.386
4.48	-1.71	-0.154	0.755		-0.522	-1.38	0.309	1.4	0.878
4.11	-1.23	-0.108	0.319		-0.195	-0.178	-0.336	0.591	-0.231
4.22	-1.17	0.0117	-0.0861		-0.355	-0.51	-0.926	-0.119	0.378
3.9	-1.32	0.161	-0.211		-0.617	-0.733	-0.349	-0.221	0.146
3.39	-1.27	-0.371	-0.565		-0.771	-0.27	-0.811	0.229	0.174
3.58	-0.935	0.52	-1.61		-0.825	-0.756	-0.208	-0.317	-0.234
3.47	-1.21	0.284	-2.08		-0.69	-1.04	0.134	-1.03	1.37
2.76	-1.16	0.677	-1.82		-0.257	-0.508	-0.318	-0.0442	0.654
2.97	-1.31	0.0147	-0.486		-0.584	-0.972	-0.992	-1.17	1.81
2.76	-1.16	-0.473	-1.1		-0.634	-1.13	-0.493	0.376	2.12
3.07	-1.2	0.445	-0.148		-1.19	-0.703	-0.337	-0.273	0.748
2.95	-0.802	0.771	-0.775		-0.596	-1.34	-0.807	-0.739	0.822
2.14	-0.681	0.441	-0.433		-0.49	-0.933	0.0426	-0.363	-0.573
2.73	-0.699	0.37	-0.444		-0.749	-0.719	0.675	-0.536	-0.014
2.1	-0.905	0.95	-0.097		-0.696	-0.755	-1.5	-0.433	1.22
1.97	-0.622	0.0619	-0.368		-0.627	-1.19	-2.79	-0.24	0.167
1.87	-1.14	0.702	-0.537		-0.375	-1.09	-0.494	0.129	0.246
1.73	-0.988	0.518	-0.299		-0.151	-0.603	-0.358	-0.88	-0.476
1.71	-0.58	-0.753	-0.659		-0.121	-1.06	-0.954	-0.76	0.357
2.37	-0.921	-0.433	0.222		-0.489	-0.885	-0.783	-0.356	1.43
1.79	-0.764	-0.143	-0.757		-0.924	-1.14	-0.672	-0.433	1.11
1.48	-0.539	-0.827	-0.716		-0.347	-1.11	0.275	-0.666	0.299
0.916	-1.1	-0.334	-0.965		-0.795	-1.34	-0.144	0.65	1.45
1.45	-1.11	-0.335	-1.33		-0.318	-0.948	0.773	1.48	0.916
1.09	-1.23	-0.256	-0.795		-1.02	-1.16	-0.235	1.6	-0.231
0.891	-1.01	-0.117	-0.889		-0.711	-1.36	0.136	1.59	2.07
0.494	-1.29	-0.197	-0.259		-0.446	-0.772	-0.888	1.36	1.5
0.136	-1.23	-0.567	-0.528		-0.607	-1.17	0.405	0.679	1.72
0.628	-0.833	0.258	-0.805		-0.275	-1.06	1.08	0.182	0.142
0.195	-1.23	0.372	-0.906		-0.333	-1.04	-0.761	-0.0615	1.01
0.095	-1.56	0.0853	-0.956		-0.635	-1.02	1.68	0.298	0.453
0.435	-1.09	1.22	-0.403		-0.899	-1.36	-0.361	0.0741	-0.614
0.487	-0.972	0.074	-0.445		-1.27	-0.641	2.26	-0.187	-0.612
0.387	-1.04	-0.353	0.251		-0.386	-0.278	0.94	-0.0113	0.987
0.955	-0.367	0.246	0.0314		-0.0867	-0.459	1.23	0.064	0.664
1.06	-0.246	-0.145	0.424		0.344	-1.24	-1.96	1.5	0.769
1.01	0.0537	0.274	0.238		0.298	-1.07	-1.08	0.67	-0.669
0.3	0.0336	0.703	0.56		-0.436	-0.483	-0.775	0.316	0.925
1.05	0.0706	1.07	0.337		-0.388	-0.448	-0.817	0.155	-0.174
0.978	0.242	-0.0263	1.04		-0.873	-0.529	-0.604	0.737	-0.727
0.55	0.358	0.233	1.14		-0.614	-0.874	0.823	0.677	-0.0864
0.854	0.137	0.983	0.212		-0.324	-0.493	-0.226	0.928	0.259
0.579	0.0977	1.49	0.79		-0.0289	-0.599	-0.495	3.1	-0.656
0.351	-0.338	1.51	-0.421		-0.174	-1.08	1.02	2.38	-0.904
-0.222	-0.31	2.23	0.0627		0.258	-0.523	1.01	1.83	-0.308
0.275	-0.461	1.29	0.503		0.609	-0.747	0.606	2.06	-0.322
0.99	-0.62	0.998	1.06		0.592	-0.925	-0.0905	1.72	0.144
0.155	-0.378	1.35	0.925		0.098	-0.647	-0.443	2.58	0.147
-0.204	-0.48	0.766	0.0491		-0.0954	-0.415	-0.472	2.05	-0.343
0.09	-0.0909	0.639	0.543		-0.507	0.54	1.22	1.58	0.371
0.67	-0.124	0.465	2.19		-0.334	1.11	-0.214	0.926	-0.572
0.0069	-0.637	1.35	2.02		-0.343	0.545	0.43	0.66	-0.403
0.28	-0.211	1.19	1.04		0.0421	0.903	-0.82	0.931	0.898
0.0966	-0.697	0.95	1.05		0.3	0.56	-1.06	0.932	0.554
0.0924	-0.712	0.432	1.86		0.0313	-0.1	-1.29	0.724	-0.948
-0.302	-1.04	0.314	2.21		0.274	0.173	-2.53	0.673	0.115
-0.168	-0.94	0.354	2.42		-0.366	-0.297	-0.736	0.543	-0.668
0.431	-1.1	0.514	2.31		0.569	-0.0341	1.39	1.19	-0.0214
-0.384	-0.656	-0.329	2.07		0.417	-0.672	0.187	-0.689	-0.139
0.895	-0.621	-0.265	3.02		-0.4	-0.31	0.264	-0.438	-0.426
0.704	-1	-0.658	2.34		0.167	-0.566	0.47	0.635	0.306
0.0557	-0.654	-0.188	2.19		0.404	-1.05	2.07	0.408	-0.722
0.302	-0.5	0.62	2.33		0.811	-0.944	1.42	-0.407	-0.813
0.472	-0.482	0.366	2.09		-0.0476	-0.84	-0.125	-0.431	1.01
0.187	-1.26	0.223	2.27		0.0774	-0.332	0.227	-0.352	1.7
-0.122	-1.02	0.271	2.25		0.29	-0.866	0.66	-0.259	1.22
0.622	-0.885	-0.263	1.97		1.13	-0.53	-0.363	-0.0756	0.739
0.122	-1.21	0.911	1.9		0.741	-0.686	-1.03	0.184	-0.229
0.418	-0.916	-0.226	1.75		-0.528	-0.991	-0.0196	-0.00697	0.931
0.409	-1.21	-0.173	1.65		0.657	-1.05	0.0445	-0.192	0.0647
-0.111	-1.27	0.35	1.26		0.497	-1.17	-0.187	0.31	0.167
-0.41	-1.53	0.523	1.07		-0.316	-0.595	-0.874	-0.534	1.41
-0.959	-1.28	0.796	0.429		0.567	-0.636	-0.474	-0.316	1.48
-0.228	-1.63	0.6	0.466		0.433	-1.4	-1.25	0.605	0.89
-0.158	-1.43	0.574	0.233		0.401	-1.62	-1.37	-0.417	0.525
-0.432	-1.68	0.936	-0.148		0.177	-1.09	-0.287	0.313	0.143
-1.2	-1.38	0.36	-0.393		-0.419	-1.24	-0.741	0.847	1.74
-0.274	-1.09	1.15	-0.459		0.161	-1.43	0.964	0.544	1.89
0.021	-0.982	1.07	-0.188		-0.456	-1.38	-0.844	0.531	0.945
-0.132	-1.28	0.264	-0.203		-0.328	-1.57	1.69	0.66	1.41
0.154	-0.951	0.478	-0.667		0.0922	-0.945	-0.208	1.03	0.656
0.0541	-1.18	0.658	-0.0309		0.301	-1.34	-0.824	0.672	0.759
0.0903	-1.04	0.378	1.22		-0.0486	-1.43	-0.188	1.03	1.82
0.254	-0.706	1.53	2.26		0.0306	-1.22	-0.241	1.22	0.957
0.0549	-0.511	0.709	2.07		0.116	-1.38	-0.188	0.626	-0.545
-0.08	-0.112	0.71	1.46		0.454	-1.22	1.71	1.94	0.323
0.428	-0.413	1.08	1.68		-0.308	-1.02	0.487	1.02	1.52
0.178	-0.46	0.93	1.25		0.44	-1.68	0.921	1.36	2.88
-0.132	-0.245	0.441	1.2		0.11	-1.77	-0.45	0.102	1.13
-0.401	-0.312	0.608	1.05		0.635	-1.36	-0.195	0.817	2.41
-0.379	-0.857	1.38	0.882		-0.181	-1.76	1.12	0.818	1.32
-0.0633	-0.697	1.6	0.902		0.314	-1.4	-0.0674	0.434	2.03
0.21	-0.475	1.29	1.16		-0.0158	-1.64	-0.0745	-0.635	0.891
0.0552	-1.05	0.904	1.51		0.0522	-1.55	0.342	-1.13	0.0421
0.242	-0.839	0.21	0.53		-0.753	-1.4	1.98	-0.343	0.338
-0.0945	-0.677	0.706	0.902		-0.311	-0.91	0.242	-0.254	0.301
-0.559	-0.396	-0.0135	1.15		-0.224	-0.863	0.0747	-1.13	-0.472
-0.417	-0.17	1.11	0.63		0.607	-0.645	-0.47	-0.873	1.2
-0.179	-0.912	-0.135	0.854		-0.508	-1.07	2	-0.343	0.681
0.106	-1.02	0.284	0.97		0.563	-0.967	-0.22	-0.712	-1.42
0.218	-0.31	-0.0701	0.521		0.511	-1.4	-0.0819	-0.0233	-0.249
-0.236	-0.647	0.198	-0.304		0.392	-0.946	1.25	0.411	-0.0302
-0.0878	-0.393	-0.643	0.185		0.745	-1.94	0.791	-0.214	0.275
-0.269	-0.548	0.00454	-0.273		1	-0.859	0.607	-0.441	0.493
-0.379	-0.771	-0.211	0.569		0.797	-1.02	0.511	-0.644	1.07
-0.0645	-0.216	0.133	0.591		1.43	0.205	1.96	-1.24	0.679
0.0454	0.218	-0.329	0.162		1.86	1.4	1.05	-0.393	0.647
-0.767	-0.235	-0.486	0.607		2.38	0.952	0.267	-0.551	1.05
-0.871	-0.419	0.672	0.662		0.327	1.31	1.25	-0.927	1.46
-0.77	-0.233	0.415	0.644		1.34	1.14	1.61	-1.29	1.23
-1.95	-0.402	1.25	1.11		1.36	1.5	0.264	-0.625	0.952
-0.463	-0.214	0.891	3.08		1.35	0.911	-0.189	-1.91	0.221
-0.143	-0.211	1.13	2.99		1.19	0.555	-0.389	-0.969	0.586
-0.576	-0.144	0.528	2.67		0.688	0.567	0.643	-0.38	0.134
0.355	-0.142	1.47	2.71		0.766	0.345	0.462	0.0644	0.602
-0.119	0.759	0.963	1.78		1.42	-0.124	0.433	-0.858	-0.0472
-0.171	0.428	0.714	2.09		0.769	0.0884	0.0901	-0.0717	0.338
-0.6	0.63	0.635	2.16		1.2	0.363	-0.0946	-0.66	2.67
-0.432	0.157	1.22	2.52		1.44	0.347	0.916	-0.776	2.65
-0.833	0.163	0.94	2.09		2.15	-0.0609	0.694	-1.11	2.85
0.105	-0.0841	1.48	2.02		1.56	0.322	0.638	-1.02	2.48
-0.371	0.474	4.32	2.49		1.89	-0.289	1.31	-0.731	1.03
-0.403	0.451	4.74	2.14		1.78	0.173	0.893	-0.872	2.15
-1.08	-0.0352	4.8	2.27		1.92	-0.251	-0.18	-1.7	1.22
-1.18	0.228	4	2.25		1.37	-0.0943	0.0898	-0.516	0.366
-0.942	-0.224	3.49	1.91		1.05	-0.388	0.247	-0.0399	0.992
-1.14	-0.28	3.86	1.45		1.13	-0.875	-0.0108	-0.522	2.67
-0.326	-0.592	3.59	2.3		2.48	-0.14	0.38	-0.439	0.681
-0.938	-0.586	2.93	2.17		3.03	-0.737	0.183	-1.16	0.277
-0.426	-0.892	2.67	1.71		4.9	-1.04	-1.02	-0.741	2.13
-1.03	-0.924	2.98	1.14		3.77	-1.09	1.23	-0.864	1.9
-0.224	-1.06	2.7	0.673		3.83	-0.129	1.21	-0.605	2.53
-0.121	-0.611	2.7	0.18		3.8	2.33	1.25	-0.796	1.91
-0.0803	-0.775	1.78	0.257		3.35	2.38	1.07	-0.567	3.43
-0.563	-0.741	1.47	0.689		3.26	2.57	-0.648	-0.348	1.95
-0.188	-0.6	1.85	0.524		3.02	1.92	0.508	-0.892	2.21
-0.29	-0.648	1.47	0.87		3.08	1.45	0.474	-0.409	1.18
-0.607	-0.699	1.59	0.692		2.59	1.21	0.00566	-0.57	1.66
-0.97	-0.487	1.25	0.689		2.63	1.41	1.27	-0.667	1.56
-0.632	-0.157	0.806	0.744		2.44	1.55	0.656	0.225	0.981
-0.845	-0.34	0.773	-0.199		2.71	1.33	-0.797	1.42	1.84
-0.188	-0.458	1.14	0.582		2.02	1	-0.199	1.1	1.83
-0.334	-0.624	0.262	0.879		2.2	0.802	0.664	1.11	2.43
-0.901	-0.871	0.98	-0.307		2.33	0.526	-0.129	1.29	2
-1.11	-0.594	0.856	-0.132		1.56	0.269	-1.39	0.958	2.7
-1.03	-0.358	0.295	0.133		1.59	0.505	0.129	0.649	1.58
-0.434	-0.798	0.783	-0.207		1.52	0.522	-0.373	0.95	1.46
-0.727	-0.379	0.0398	0.143		1.36	-0.0887	-0.485	0.925	2.26
0.102	0.199	-0.0144	0.369		1.43	0.345	1.29	0.983	1.95
-0.0687	0.528	-0.542	-0.279		1.51	-0.0291	-0.84	0.438	2.05
0.0887	1.06	0.57	-0.425		0.688	0.317	-0.917	1.74	2.04
-0.0486	0.834	0.549	-0.614		1.49	0.259	-0.793	0.501	2.54
0.281	1.06	1.86	-0.907		0.911	1.16	-1.41	0.67	1.98
0.644	0.864	0.447	-1.1		0.852	1.82	0.422	0.971	0.724
0.398	0.844	1.11	-0.252		0.262	1.67	-1.16	0.103	1.35
0.722	0.516	0.62	-0.256		-0.042	1.18	-2.23	0.542	0.632
0.484	0.572	0.94	-0.347		0.636	1.15	-1.62	0.315	0.449
1.04	0.406	0.608	-0.273		0.342	0.965	-0.0795	0.034	1.04
1.54	0.808	0.748	-0.394		0.827	0.581	-0.732	-0.346	1.56
1.03	0.847	0.392	-0.274		0.217	0.691	0.398	-0.213	-0.442
0.757	0.656	0.712	-0.526		-0.3	0.735	-0.327	0.135	0.187
0.805	0.814	0.381	-0.65		-0.0684	0.607	-0.743	-1.12	-0.143
0.947	0.837	0.329	-1.12		0.228	0.516	1.5	-0.158	1.56
0.779	1.29	-0.472	-0.279		-0.628	0.219	1.12	-1.05	2.49
0.851	1.47	0.641	-0.57		-0.119	0.0365	-1.1	0.555	2
0.388	1.74	0.88	-0.526		-0.278	0.622	-1.21	1.19	0.829
0.218	1.58	0.865	-0.839		-0.172	0.224	-0.139	0.566	1.88
-0.0874	1.19	0.635	-1.64		-0.145	-0.1	0.347	0.274	1.19
0.159	0.931	-0.27	-1.22		-0.251	0.508	-0.716	0.738	0.865
0.741	1.04	-0.737	-1.65		-0.212	0.396	0.274	0.763	1.71
0.901	0.828	-0.421	-1.3		0.212	-0.144	-1.35	0.805	0.417
0.132	0.389	0.536	-1.09		-0.492	-0.293	-0.145	0.576	1.84
0.237	0.427	0.728	-1.07		-0.884	0.398	0.443	0.757	0.678
-0.0272	0.639	-0.447	-1.03		-0.669	0.146	-0.114	1.49	0.404
-1.15	0.631	-0.951	-1.29		0.143	0.314	-1.06	2.13	1.7
-1.14	0.327	-0.214	-0.855		0.712	0.322	0.0992	3.18	1.85
-0.576	0.415	-0.0794	-1.26		0.938	0.118	-1.21	2.68	0.863
-0.409	0.838	0.0678	-0.566		0.226	0.182	-0.51	1.57	1.75
-0.143	1.13	-0.816	-0.958		1.16	-0.301	0.219	-0.0608	1.88
-1.08	1.02	0.0697	-1.04		0.533	0.031	-0.0238	0.966	1.02
-0.539	0.852	-0.407	-0.689		0.518	-0.0924	-0.756	0.569	1.15
-0.86	0.724	-0.851	-0.772		0.699	0.285	0.0615	0.179	1.05
-0.592	0.981	-1.23	-0.362		0.407	0.304	0.864	0.865	1.37
-0.176	0.946	-0.483	-1.24		0.108	-0.466	0.314	1.39	1.04
0.649	0.87	-0.829	0.106		-0.19	-0.327	-0.0236	0.597	-1.03
0.137	1	-0.64	0.238		0.093	0.208	-0.298	0.696	-0.0288
0.743	0.628	-1.73	0.431		0.127	0.161	0.118	0.379	0.0344
0.715	0.425	-1.18	1.38		0.17	0.52	-0.132	0.71	-1.23
0.634	0.0968	-0.503	1.66		-0.368	0.252	0.733	0.718	-0.936
0.332	-0.0245	0.0451	2.54		0.383	0.0497	0.864	1.55	-0.12
0.248	-0.0868	-0.924	3.46		0.869	0.265	0.0266	0.286	-0.505
0.731	0.0224	0.000881	2.79		1.62	0.431	1.15	-0.171	-0.986
0.259	-0.227	-0.345	2.97		1.44	0.473	0.717	0.0341	-0.852
0.346	-0.0218	-0.862	2.03		1.33	0.246	-0.933	0.264	0.26
-0.185	0.3	0.538	1.67		1.49	-0.178	-0.0238	0.0607	1.89
0.244	0.317	-0.38	1.32		1.24	-0.0915	0.724	0.221	-0.101
-0.0189	-0.0354	-1.27	0.197		1.99	-0.527	0.287	-1.12	0.128
-0.433	0.294	-1.42	1.21		1.18	-0.0527	-0.0705	0.222	-0.0248
0.122	-0.155	-0.935	1.07		0.926	-0.0133	0.309	-0.268	0.843
0.028	0.477	0.155	1.21		1.27	-0.245	0.81	0.151	-0.149
-0.107	0.303	-0.297	0.569		1.44	0.446	0.627	-0.526	-0.445
-0.403	0.375	-0.408	0.718		0.927	0.314	0.785	-1.44	-0.172
-0.521	0.323	-0.218	-0.00862		0.991	0.0383	0.19	-2.6	0.724
-0.19	0.334	-0.249	0.156		0.823	0.218	-0.142	-2.47	0.557
-0.056	1.23	-1.29	0.281		0.714	0.0307	0.179	-1.41	-0.918
-0.321	1.64	-1.06	-0.354		1.3	0.284	-0.298	-0.859	-0.428
-0.513	2.55	-0.684	0.114		1.44	-0.174	0.0913	-1.04	-0.582
-0.71	2.47	0.432	0.256		2.31	-0.352	-0.136	-1.32	0.166
-0.673	2.44	-0.289	-0.411		1.71	-0.492	0.0678	-1.45	0.632
-1.32	2.71	0.137	-0.368		1.96	-0.178	0.259	-1.84	1.33
-0.845	2.86	0.948	0.371		2.44	-0.435	0.589	-1.61	0.342
-1.54	3.24	0.659	0.21		2.55	0.159	0.963	-1.5	0.45
-1.29	2.94	0.815	0.389		2.18	0.875	-0.511	-1.6	-0.535
-0.924	2.79	0.946	-0.256		1.82	0.98	0.744	-1.35	0.0114
-1.36	2.58	0.494	-1.07		2.01	1.13	0.0479	-1.12	-0.336
-1.59	2.49	0.502	-0.59		1.45	-0.0287	0.711	-0.853	0.0355
-1.22	2.41	0.493	-0.82		2.03	0.146	1.1	-0.428	-0.514
-0.0194	2.28	0.0251	-0.86		1.45	0.623	-0.637	-1.12	1.67
0.0503	1.77	-0.152	-1.11		1.67	0.568	0.466	-0.484	-0.314
-0.364	1.81	-0.0552	-0.129		1.49	0.43	1.33	-0.663	-0.252
-0.408	1.39	1.13	0.312		0.816	0.0557	0.195	-1.18	-0.0145
-0.91	1.42	0.00143	0.206		0.596	0.533	0.0925	-1.01	1.21
-0.336	1.51	-0.0764	0.174		0.937	0.812	1.02	-1.49	2.21
-0.945	1.31	-0.927	-0.0694		0.325	0.618	0.744	-1.68	2.01
-1.5	1.45	-0.9	0.258		0.594	0.569	0.618	-0.214	1.35
-0.972	1.46	-1.39	0.517		0.42	0.114	0.0947	-0.78	1.58
-0.935	1.3	-1.34	0.931		-0.118	0.852	-0.0729	-0.451	0.111
-0.497	1.2	-0.695	0.815		-0.325	0.908	0.0202	-0.624	-0.286
-0.74	1.44	-1.16	1.12		0.387	0.717	1.17	-0.917	0.286
-0.188	1.26	-0.86	1.41		0.274	0.878	-0.105	0.0387	0.873
0.0621	0.98	-0.977	1.16		-0.133	0.871	1.22	0.77	1.4
0.169	0.912	-0.495	1.22		0.0584	0.306	0.0195	-1.28	0.998
0.344	0.843	-0.464	0.968		-0.134	0.033	-0.426	-1.27	1.81
0.442	1.25	-0.527	-0.471		-0.491	0.0358	-0.704	-0.0993	1.16
-0.565	1.05	-0.656	-0.175		-0.0513	0.731	0.728	-1.38	1.36
-0.106	1.15	-0.151	-0.426		-0.191	0.584	1.05	-0.95	1.1
-0.261	1.44	-0.321	-0.151		0.181	1.67	1.9	-0.78	1.06
-0.516	0.939	-0.11	-0.176		0.0902	1.49	1.08	-1.47	1.11
-0.696	1.25	-0.183	-0.496		0.256	1.09	-0.404	-0.846	2.1
-0.397	1.14	-0.55	-0.516		0.122	0.82	1.02	-1.52	1.18
-0.808	1.44	0.362	-1.89		-0.108	0.683	-0.606	-0.266	2.11
-0.891	1.39	-0.3	-1.51		-0.422	0.714	0.769	-0.162	1.56
-0.567	1.63	-0.188	-1.37		-0.276	0.681	0.273	0.492	0.309
0.484	1.4	-0.624	-0.442		0.642	0.419	1.62	0.214	0.472
0.247	1.73	-0.124	-0.347		0.938	0.741	1.31	-0.573	0.48
0.429	1.7	-0.16	-0.569		0.529	0.235	1.44	0.414	0.385
0.701	1.34	-0.881	-0.601		0.338	0.454	0.854	0.0403	0.68
0.504	1.13	-0.5	-0.136		1.33	0.823	1.6	0.207	1.72
1.05	0.871	-0.504	-1.23		1.29	0.023	0.0425	0.0986	1.1
0.641	1.16	-0.801	-1.42		1.45	0.397	1.04	-0.439	0.0766
0.0214	0.637	-0.77	-0.741		1.14	0.855	1.31	-0.637	0.879
0.731	0.397	-0.85	-0.907		0.407	0.574	3.88	-0.889	2.28
0.185	0.569	-0.656	-1.35		0.414	0.283	2.29	-0.096	1.54
-0.282	0.554	-0.851	-0.278		0.524	0.18	-0.553	-0.0138	0.826
-0.603	0.783	-0.623	-0.335		-0.0694	0.0889	0.446	0.0475	1.09
-0.697	0.584	-1.42	-0.423		0.556	0.113	0.66	0.634	1.32
-1.23	0.46	-1.31	-0.868		0.00259	0.177	1.13	0.414	1.53
-0.52	0.846	-0.676	0.00229		0.154	-0.0263	1.01	0.0729	1.94
-0.456	0.554	-0.492	-0.338		-0.188	0.203	-0.666	0.19	2.98
-0.242	0.683	0.333	-0.907		-0.169	-0.399	1.31	-0.521	2.42
-0.211	0.844	-0.4	-0.85		0.365	0.394	1.61	0.768	2.98
-0.171	1.05	-0.784	-2.07		-0.777	-0.389	2.55	0.767	1.23
-0.886	1.13	-1.03	-1.49		-0.15	1.25	1.72	0.505	1.68
-1.11	0.679	-0.804	-1.22		0.43	1.86	-0.353	-0.0771	1.03
-0.356	0.387	0.0763	-1.11		-0.096	1.37	2.24	-0.472	1.67
-0.678	0.784	-0.277	-0.182		-0.135	1.07	-0.626	0.00673	0.856
-0.418	1.13	0.0324	-0.511		-0.539	0.565	0.28	0.728	1.25
-0.243	1	0.262	-0.272		0.235	1.46	0.741	2.07	1.25
-0.0498	0.854	-0.259	-0.466		-0.101	0.979	1.21	0.778	1.13
0.00842	1.04	-1.1	-0.668		-0.372	1.35	0.451	0.565	0.413
0.428	0.627	-0.778	-1.26		-0.192	1.58	1.38	0.833	1.97
-0.0878	0.784	-0.95	-0.879		0.0735	1.48	0.55	1.39	0.312
0.179	1.28	-0.345	-0.524		-0.292	1.56	-0.703	1.12	1.23
0.413	0.77	-0.171	-0.175		-0.397	1.75	-1.78	1.4	-0.289
-0.0079	0.609	-0.389	-0.311		0.669	0.583	-0.724	1.07	1.98
-0.34	0.67	0.417	-0.387		0.601	-0.314	-0.513	1.2	1.69
-0.397	0.886	-0.46	-0.442		1.13	0.221	0.341	0.603	-0.624
-0.496	0.823	-0.225	-0.819		0.699	-0.148	1.17	1.29	0.362
-0.394	0.639	-0.934	-1.11		1.18	0.794	1.23	0.72	-0.096
-0.0277	0.637	-0.775	-0.255		0.792	0.85	0.119	0.607	0.665
0.562	0.592	-1.43	-0.126		0.471	1.83	1.7	0.296	0.0167
0.632	0.492	-1.57	-0.0182		-0.0109	2.26	1.32	1.03	0.455
0.596	0.392	-1.02	-0.163		0.371	2.89	0.995	0.413	1.22
0.684	0.259	-0.0828	-0.829		0.959	1.66	2.16	-0.111	1.5
0.446	0.189	0.813	-1.07		0.425	1.97	0.88	2.13	0.655
0.505	-0.313	0.933	-0.651		0.166	1.98	0.866	0.703	-0.131
0.656	-0.183	0.11	-0.845		0.175	1.26	-0.546	0.762	-0.0713
0.0538	0.14	-0.385	-0.5		-0.177	1.56	1.31	-0.178	0.419
0.462	-0.586	0.122	-0.0939		0.864	1.18	0.0756	1	1.32
0.0114	-0.912	-0.326	0.14		-0.825	0.821	-0.297	1.32	0.652
-0.0331	-0.456	-0.482	-0.361		-0.0968	0.902	-0.0191	0.0646	0.491
0.014	0.252	-0.228	0.318		0.0518	0.381	1.94	0.304	-0.335
-0.263	0.74	0.757	-0.228		-0.0471	0.304	-0.493	0.424	0.684
-0.552	0.931	-0.0329	-0.355		0.00433	0.417	0.21	1.04	0.117
-0.367	1.02	-0.0277	-0.214		0.264	-0.0215	0.25	0.542	0.219
-0.52	1.17	-0.441	0.356		-0.316	0.316	1.17	0.231	-0.372
-0.535	1.03	-0.0414	0.229		0.423	0.637	-0.0977	0.787	0.688
0.168	1.42	-0.431	-0.325		0.524	1.09	-0.48	-0.278	1.09
-0.628	1.12	-0.199	-0.505		0.797	0.962	-1.06	-0.149	0.612
-0.242	0.841	-0.287	-0.301		1.2	0.725	0.0882	0.371	0.685
-0.428	1.24	-0.757	-1.12		1.89	0.499	-0.576	-1.06	0.373
-0.177	0.908	0.0127	-1.47		2.26	0.537	-0.421	-0.693	0.101
-0.405	1.08	-0.706	-1.14		2.35	-0.11	-1.69	0.0162	0.2
0.227	1.29	-0.325	-1.44		2.38	-0.0474	0.59	-0.746	1.18
0.441	0.553	1.04	-1.32		2.17	0.154	-0.681	-0.653	1.49
-0.186	-0.0733	0.35	-1.5		2.38	0.409	-1.01	-1.13	1
-0.0817	-0.587	0.557	-1.59		1.67	0.262	-0.386	-0.72	0.929
-0.538	-0.324	-0.326	-1.31		1.52	0.00833	-1.68	-1.14	0.885
0.0211	-0.505	-0.57	-0.896		0.613	-0.168	-0.852	-0.653	0.431
-0.109	-0.711	-0.247	-0.116		1.37	-0.463	-1.22	-1.68	0.21
-0.823	-0.703	-0.0441	-0.668		0.473	-0.278	0.182	-0.902	-0.461
-0.647	-0.461	-1.07	-0.752		0.221	-0.744	-0.519	-0.51	0.00378
-0.849	-0.459	-0.785	-0.739		0.433	0.0278	0.421	-0.844	-1.49
-0.291	-0.423	-0.567	-1.3		0.605	0.713	-0.295	-0.826	-0.257
0.772	-0.179	-0.455	-1.04		0.811	0.596	-1.34	-0.32	0.997
1.01	0.397	-0.379	-0.671		0.00237	0.75	-0.822	-0.715	0.242
1.01	0.384	-0.794	-0.504		0.624	0.515	0.271	-1.02	0.537
0.718	0.549	0.126	-0.672		0.467	0.613	-1.73	-0.747	0.024
0.927	0.349	-0.452	-0.31		1.11	0.734	0.683	-0.451	0.378
0.544	0.104	-0.932	-0.624		0.76	0.789	-0.327	-0.534	0.107
0.345	0.226	1.01	-0.893		0.148	0.745	-0.59	0.0115	0.378
-0.0991	0.144	-0.185	-0.964		0.895	0.492	-1.03	-0.719	1.23
-0.0467	0.331	-0.657	-1.18		0.351	0.216	-0.5	-0.807	0.0303
-0.0728	0.176	0.188	-1.34		-0.142	-0.457	0.178	-1.33	0.516
-0.412	-0.273	-0.0899	-1.07		0.285	-0.459	0.539	-1.3	0.292
0.0327	-0.326	-0.743	-0.9		-0.68	-0.466	0.118	-0.757	0.166
-0.264	-0.132	-0.764	-0.935		0.0167	-0.734	-0.482	-0.479	-0.14
-0.515	-0.165	-0.893	-1.28		0.0398	-0.178	0.133	-1.34	0.3
-0.257	-0.169	-0.286	-1.14		0.0309	0.367	-0.395	-1.01	0.3
-0.791	-0.176	-0.276	-1.03		-0.466	0.236	-0.353	-1.05	0.997
-0.603	-0.121	0.571	-0.654		0.313	0.102	1.67	-0.542	0.11
-0.17	-0.117	0.623	-0.598		0.482	-0.498	0.0443	-0.984	0.708
-0.737	-0.0388	0.106	-0.889		0.0701	-0.554	-0.111	-1.16	0.718
-0.0903	0.0408	-0.619	-0.943		0.535	0.00352	0.204	-2.02	-0.847
-0.329	-0.292	-0.662	-1.04		0.25	0.0762	0.63	-0.876	-0.54
-0.187	-0.133	-0.596	-0.09		0.701	0.674	-0.526	-1.12	-0.8
0.256	-0.602	-0.738	0.786		0.075	0.439	0.545	-1.25	-1.23
-0.202	-0.485	-0.576	0.596		0.349	-0.293	-0.544	-0.829	-0.179
-0.174	-0.13	-0.0202	0.28		0.517	-0.000754	-0.92	-1.69	0.203
-0.364	-0.502	-0.18	0.0885		0.201	0.00847	-0.42	-1.08	0.625
0.268	-1.07	-0.325	-0.0238		0.322	-0.694	0.103	-0.638	0.84
-0.113	-0.808	-1.01	0.333		0.475	-0.156	0.802	-0.79	0.237
-0.205	-0.451	-0.882	0.344		0.229	-0.5	0.501	-1.7	-0.55
-0.842	-0.562	-1.02	-0.553		-0.0304	-0.733	0.115	-0.815	-0.0811
-0.331	-0.884	-0.65	-0.554		-0.021	0.0146	0.324	-0.904	0.606
-0.155	-0.12	-1.76	-0.649		-0.607	-0.138	0.448	-0.796	-0.453
-0.00106	-0.587	-1.28	-0.472		0.0344	0.241	0.0609	-0.883	-0.664
-0.238	-0.747	-0.76	-0.22		0.145	-0.392	0.392	0.048	-0.0883
-0.431	-0.567	-0.723	-0.107		0.0995	-0.392	1.99	0.4	-0.0212
-0.706	-0.316	-0.379	-0.599		-0.181	-1.01	-0.0308	-0.0982	0.15
-0.753	-0.566	-0.196	-1.22		0.488	-0.409	-0.549	-0.0439	0.257
-1.37	-0.662	-0.576	-1.44		0.0815	-0.536	-0.15	-0.201	0.116
-1.35	-0.709	-1.39	-1.62		-0.259	-0.469	1.2	-1.3	0.211
-0.753	-0.632	-0.505	-1.57		0.505	-0.32	-0.313	-0.766	-1.2
0.262	-1.04	-1.27	-0.948		0.894	0.23	0.548	-1.12	1.26
0.484	-0.975	0.356	-0.661		0.999	-0.079	0.85	-1.58	-0.366
-0.495	-0.663	-0.0443	-0.664		0.644	-0.678	-1.19	-0.149	0.563
-0.398	-0.475	-0.152	-0.957		1.13	-0.672	0.241	-1.19	-1.07
0.445	-0.637	-0.0664	-0.082		0.937	-0.793	0.519	-0.298	0.158
0.85	-1.31	-0.146	-0.463		1.23	-1.06	-0.377	-1.23	-0.793
0.38	-0.967	-0.381	-0.202		0.808	-0.779	-1.27	0.0307	-0.228
0.142	-0.501	0.137	0.468		1.08	-0.564	-0.461	-0.915	-0.23
0.931	-0.728	-0.459	0.453		1.09	-0.755	-0.174	-0.833	0.687
-0.0323	-0.163	-0.0823	0.983		1.39	-0.846	0.258	-0.53	0.062
0.449	0.0573	-0.409	-0.368		1.09	-0.0346	0.355	-0.794	0.0422
-0.171	0.175	-0.499	0.32		0.564	0.0387	-0.0393	-0.752	-0.0575
0.0837	0.294	-0.419	0.766		-0.0406	0.0894	0.479	-1.13	0.0884
0.181	-0.132	-0.307	0.811		0.498	0.641	-0.718	-0.282	-0.864
0.15	-0.0951	-1.07	0.824		0.474	-0.206	0.847	-0.0997	-0.606
0.502	-0.174	-1.26	-0.351		0.0154	-0.0466	0.297	-0.291	-0.784
-0.362	-0.0511	-1.23	0.175		-0.208	-0.0614	-1.13	-0.906	0.0472
-0.929	-0.172	-0.992	-0.0823		0.0398	0.187	-0.767	-0.616	0.697
-0.232	-0.217	-0.921	-0.44		0.0666	0.477	-1.64	-0.788	0.941
-0.714	-0.0646	-1.1	-0.632		0.265	-0.236	-1.1	0.23	-1.28
-0.65	0.027	-0.873	0.182		0.457	-0.291	0.359	-1.03	0.147
-0.321	-0.18	-1.41	0.232		-0.677	-0.541	-1.88	0.99	-0.66
-0.874	-0.396	0.0258	0.276		-0.28	-0.163	-0.419	0.0647	-0.71
-0.611	-0.833	-0.169	-0.541		-0.259	-0.396	0.132	-0.465	-0.793
-0.364	-0.253	0.342	-0.788		-0.1	-1.07	0.671	-0.478	-0.301
0.116	-0.0123	0.477	-1.17		0.181	-0.258	0.581	0.216	-0.244
0.0433	0.00424	-0.168	-0.526		0.0851	-0.674	-0.124	0.864	0.46
0.0884	0.117	0.0385	-1.37		0.656	-1.24	0.416	1.21	-0.774
0.106	0.223	0.768	-0.309		-0.43	-1.21	0.374	1.38	0.645
0.098	0.102	0.686	0.0373		-0.093	-1.1	-0.429	0.629	0.146
0.0104	0.473	-0.355	-0.778		-0.887	-1.32	0.434	0.728	-0.392
0.0747	-0.0489	-0.944	-1.08		-0.838	-1.08	0.444	1.06	0.18
-0.429	0.00164	-0.445	-0.92		-0.856	-0.522	0.39	-0.0642	-1.32
-0.149	-0.154	-0.454	-0.0515		-0.522	-0.989	0.728	0.802	-0.995
0.218	-0.0637	0.183	-0.12		-0.543	-0.711	-0.118	1.38	0.236
-0.21	0.00404	-0.185	0.29		-0.518	-0.0852	0.497	1.77	-0.648
-0.37	-0.232	-0.617	-0.0843		-0.424	2.05	0.537	1.21	0.83
-0.51	0.0917	-0.791	-0.376		-0.144	1.8	0.85	1.51	0.432
-0.213	0.834	-1.66	-0.118		-0.201	1.55	1.23	1.38	0.46
-0.798	2.67	-1.7	-0.999		-0.392	1.07	-0.378	1.56	-1.25
-0.31	3.7	-0.258	-1.14		-0.631	0.905	0.00375	3.1	-0.458
0.114	3.96	-0.678	-1.22		-0.504	0.739	-0.374	2.66	-1.02
-0.364	4.01	-0.00181	-1.25		0.232	0.589	-0.556	2.81	0.0327
-0.807	3.53	-0.379	-0.636		-0.641	0.717	-0.55	2.72	-0.532
-0.739	2.94	-0.245	-0.227		-0.551	0.631	-0.623	3.22	0.842
-0.877	2.95	-0.305	-1.4		-0.391	1.1	-1.14	3.06	-1.24
-0.659	2.55	0.0123	-1.64		0.467	0.461	0.502	2.24	-1.81
-0.988	2.75	0.0876	-1.81		0.109	0.273	0.497	1.35	-0.0841
-0.433	2.23	-0.131	-1.55		-0.0344	0.642	-1.23	1.46	-0.806
-0.668	1.92	0.462	-0.88		-0.66	0.572	-1.95	2.06	-0.0263
-0.681	2.39	-0.192	-1.54		-0.359	0.72	-0.636	1.46	-0.901
-0.269	2.11	-0.383	-1.37		0.356	0.458	1.07	0.744	-0.0906
-0.913	1.98	-0.28	-0.623		0.894	0.72	0.605	0.227	0.804
-0.91	1.55	-0.267	-0.388		0.527	0.0467	0.984	0.79	-0.387
-0.889	1.65	0.539	-0.426		1.23	0.624	-0.485	0.582	1.58
-1.16	1.25	0.608	-0.89		0.513	-0.0896	-0.145	0.00434	0.654
-1.09	0.898	1.06	-0.918		1.54	-0.147	0.521	-0.496	-0.306
-0.979	0.974	0.926	0.485		1.07	-0.296	1.74	-0.229	-0.312
-2.02	0.707	0.0735	0.507		0.408	0.229	0.27	-0.0715	-0.358
-1.56	0.766	0.147	0.82		1.11	-0.185	-0.179	0.371	-0.223
-1.64	0.912	0.447	0.532		0.891	0.962	-0.494	0.0152	1.42
-0.76	1.32	0.213	0.138		0.794	-0.162	0.296	-0.935	0.347
-1.09	1.11	0.00628	0.498		0.9	0.137	-0.0353	-0.647	0.00292
-1.33	1.3	0.62	0.111		0.656	-0.728	-0.277	0.000548	0.298
-2.03	1.11	0.372	-0.0356		1.5	-0.269	-1.66	-1.69	1.06
-1.41	1.12	0.12	-0.123		1.37	-0.477	0.731	-0.781	0.0962
-1.76	0.789	-0.698	-0.365		0.753	-0.525	-0.156	-0.773	0.0711
-1.88	0.945	-0.229	-0.0843		0.704	0.213	-0.499	0.0858	0.0798
-1.32	1.08	0.152	-0.0852		0.948	0.147	0.944	0.346	-1.4
-0.61	0.703	0.634	-0.00902		1.06	-0.214	0.754	0.945	-1.09
-0.768	0.95	0.767	-0.344		0.717	-0.467	0.488	-0.732	0.343
-1.03	1.04	0.705	0.328		0.51	0.105	0.618	-0.926	0.0705
-0.255	1.4	-0.941	0.198		0.545	0.284	0.425	-0.812	-0.163
0.106	1.48	-0.69	-0.341		0.128	0.221	0.157	-1.02	-0.784
-0.0178	0.912	0.425	-0.459		0.588	0.306	0.211	0.128	0.0914
0.0164	1.32	-0.386	-0.574		0.25	0.202	0.743	-0.548	-1.66
-0.145	0.781	-0.396	-0.496		0.126	0.229	0.76	-0.697	-0.925
0.71	0.823	-0.613	-0.238		-0.241	0.204	1.09	-1.1	-0.22
0.2	0.959	-0.176	0.211		0.126	0.25	1.54	-0.774	-1.17
0.323	0.895	-0.442	0.449		2.4	0.237	0.0493	0.0464	-1.4
-0.155	1.62	-0.749	-0.282		3.33	-0.281	0.636	-0.613	-0.757
-0.691	1.78	-0.358	-0.496		2.98	-0.205	0.37	-0.326	-1.06
-0.738	2.2	0.0856	-0.678		3.01	-0.356	-0.642	-0.222	-0.327
-0.95	2.15	0.668	-0.054		3.15	-0.991	-1.17	-0.647	-1.41
-1.31	1.51	-0.113	0.0618		2.59	-0.998	-0.672	0.44	0.616
-0.41	2.02	-0.076	-0.454		2.3	-0.485	-0.861	0.365	0.559
-0.658	1.56	-0.148	-0.378		2.42	-0.132	0.414	0.294	-1.03
-0.951	1.27	-1.36	-0.678		2.13	-0.596	-0.657	-0.409	-0.963
-0.39	1.16	-0.771	-1.16		2.43	0.673	0.243	0.202	-0.256
-0.0495	1.42	0.304	-1.06		1.23	0.143	1.17	0.784	-1.39
0.972	1.19	-0.184	-0.937		1.4	0.446	-0.229	-0.109	-1.17
0.0194	0.702	0.35	-1.17		1.12	0.666	-0.107	0.459	-1.35
-0.361	0.919	-1.05	-0.479		1.19	-0.169	0.798	0.0514	-0.0367
-0.556	0.548	-1.73	-0.489		1.22	-0.0711	1.1	1.7	-0.838
-1.21	0.923	0.0975	-1.1		1.12	-0.108	0.588	1.08	-0.595
-2.04	0.416	-0.613	-0.287		0.526	0.0669	-0.589	0.633	-0.833
-1.32	0.551	-0.356	-0.372		0.975	-0.167	-0.496	0.599	-1.59
-0.266	0.338	-1.8	-0.45		0.539	0.252	0.331	0.436	-0.0168
0.127	1.29	-1.03	0.0149		0.534	-0.157	0.791	1.05	-1.69
0.485	1.69	-0.706	-0.131		0.459	-0.128	-0.468	1.3	-1.78
0.694	1.38	-1.8	-0.241		0.421	-0.244	0.442	0.378	-1.25
0.391	1.56	-1.24	-0.523		0.385	0.0392	-0.625	-0.0672	0.441
0.126	1.34	-0.398	0.259		0.615	-0.0774	-0.435	0.765	-0.513
-0.261	1.24	-0.219	-0.726		0.344	-0.238	0.7	-0.275	0.192
0.25	0.963	-0.557	-0.511		0.908	-0.286	0.321	-0.711	-0.368
-0.0435	1.26	-1.45	-0.0476		0.429	-0.329	-1.19	0.122	0.194
0.314	0.948	-0.735	-0.4		0.627	-0.263	0.882	-0.918	-0.611
0.201	0.463	-1.03	-0.83		0.405	0.0128	-0.329	-0.983	-0.0406
-1.1	0.18	-0.664	-0.567		0.39	-0.0586	-0.571	-0.317	-0.155
-1.52	-0.177	-0.873	-1.16		0.314	-0.0125	0.628	-0.501	0.981
-0.884	-0.372	-1.22	-1.44		0.602	-0.804	-0.213	-0.975	-1.18
-0.598	-0.284	-1.83	-0.0463		0.785	-0.406	-0.0711	-0.833	-0.604
-0.249	-0.0458	-1.66	-0.0661		0.561	-0.361	-0.144	-0.923	-0.0665
-0.141	-0.552	-1.77	-0.409		0.178	-0.03	-0.584	-0.918	-0.266
0.438	-0.103	-1.01	0.447		0.141	-0.612	-0.143	-0.49	-0.344
-0.379	-0.44	-1.02	0.596		0.217	-0.593	-1.04	-1.28	0.498
0.0758	-0.33	-1.38	0.829		0.134	-0.44	-0.638	-1.59	1.22
-0.551	-0.587	-1.13	0.878		-0.124	-0.114	-1.2	-1.01	-0.0746
-0.169	-0.306	-1.96	0.868		-0.798	-0.218	-1.03	-0.364	-1.16
-0.186	-0.62	-1.09	0.125		0.269	0.00435	-0.186	-1.28	-0.695
-0.311	-0.332	-0.917	-0.382		0.214	-0.169	0.162	-1.24	-1.23
0.0238	0.136	-0.845	-0.513		0.274	0.807	1.22	-1.06	-1.23
-0.111	-0.0512	-0.803	0.158		0.104	0.429	2.79	-1.75	0.368
0.0804	0.282	-0.342	-0.586		0.266	0.361	2.39	-1.41	-1.09
-0.544	0.62	-1.03	-1.78		0.381	0.667	1.05	-0.404	-0.24
-0.672	0.998	-0.206	-1.12		0.363	0.697	1.66	-1.43	-0.938
-0.947	0.547	-1.54	-1.63		0.418	0.734	3.15	-1.38	-0.406
-0.105	0.358	-0.274	-1.45		0.0922	0.0445	1.21	0.345	-0.352
-0.782	0.485	0.775	-1.41		-0.275	0.0218	1.07	2.65	-0.567
-0.665	0.394	0.418	-1.13		-0.215	-0.213	0.691	2.48	-1.07
-0.733	0.275	0.801	-1.45		-0.191	-0.277	0.269	1.39	-1.17
-0.461	0.808	1.48	-1.2		0.103	-0.277	-0.917	0.964	-1.77
0.272	0.393	0.926	-1.06		0.192	-0.607	0.488	1.01	-0.708
-0.00641	0.419	0.983	-0.436		-0.236	-0.525	0.0612	1.38	-1.25
0.241	0.496	1.02	0.0591		-0.164	-0.751	0.822	1.15	-2.49
0.563	0.138	-0.234	0.133		-0.313	-0.993	-0.706	1.13	-2.59
0.613	0.716	-0.498	0.304		0.0489	-0.444	1.09	0.633	-2.08
1.18	0.438	-0.334	-0.288		0.254	-0.444	-0.538	-0.477	-1.77
0.236	0.136	-0.559	-0.2		0.4	-0.248	2.28	-0.0614	-2.36
0.612	0.657	0.473	-0.179		0.00392	-0.197	1.3	0.215	0.197
0.814	1.22	-0.376	0.291		0.186	0.322	2.17	0.356	1.59
-0.31	1.57	-0.526	-0.189		-0.15	0.609	0.802	0.695	1.84
-0.632	0.874	0.759	-0.132		0.279	0.722	1.07	0.522	0.622
0.269	0.925	0.474	0.218		0.248	1.42	-0.256	-0.571	0.109
-0.452	0.888	0.561	-0.183		0.288	0.53	0.566	0.178	-0.298
0.0664	1.13	-0.0375	0.00747		0.174	0.26	-0.0845	0.615	0.615
-0.852	1.03	0.553	0.247		0.0203	-0.122	1.06	0.521	-0.166
-0.757	0.285	0.799	0.758		-0.224	-0.0289	1.08	1.21	0.273
-0.701	0.135	0.744	-0.08		0.289	0.569	-0.296	0.685	0.915
-0.415	0.127	0.0963	0.365		0.384	0.33	0.588	-0.466	-0.0911
-0.477	0.532	0.262	0.54		-0.0736	0.796	1.13	0.643	0.958
-0.664	0.499	0.0413	-0.186		-0.371	0.737	-0.254	0.327	0.773
0.0604	0.903	0.484	-0.468		0.261	-0.0285	-0.0929	0.806	-0.153
0.358	0.704	0.546	-0.573		-0.225	0.432	0.127	1.22	0.979
0.028	0.118	0.587	-0.417		0.193	0.516	0.948	1.23	0.0179
0.287	1.01	0.0149	-0.507		-0.107	-0.0834	0.815	1.68	-0.448
-0.158	0.853	0.509	-0.724		0.0325	-0.194	3.42	1.33	0.131
0.415	0.957	0.623	-0.97		0.258	-0.148	1.15	0.642	0.985
-0.00558	0.695	-0.0918	-0.933		-0.245	-0.276	-0.593	0.389	0.448
-1.51	0.503	-0.805	-0.584		-0.321	-0.325	0.88	0.986	1.46
-1.34	1.17	0.243	-0.841		-0.472	-0.585	1.62	1.48	0.123
-1.61	0.946	0.284	-0.804		-0.428	-0.724	0.517	0.877	-0.126
-0.289	1.26	0.572	0.018		-0.177	-0.582	1.87	1.05	-0.644
-0.304	2.58	0.0281	-1.26		-0.157	-0.747	0.417	0.341	-0.176
-0.54	3.38	-1.25	-0.492		-0.362	0.043	0.65	0.499	0.157
-0.59	3.05	-0.98	-1.44		-0.357	-0.317	-0.00117	0.00685	0.714
-0.54	2.81	-1.26	-0.918		0.0868	-0.684	0.993	0.856	1.23
-0.839	3.22	-0.998	-0.787		-0.0607	-0.197	-0.224	1.62	0.236
-0.778	2.47	-0.996	-0.634		0.0904	-0.458	0.271	1.26	-0.0854
-0.313	2.36	-0.609	-0.783		-0.137	-0.705	0.247	1.17	0.175
-0.209	2.3	-1.17	0.071		-0.106	-1.33	-0.732	1.3	0.739
-0.433	1.72	-1.88	-0.403		-0.085	-0.911	-0.174	0.75	0.78
-0.451	2.01	-2.56	-1.34		0.686	-1	-0.191	0.402	-0.906
-0.643	2.46	-1.54	-0.638		0.375	-1.05	0.755	0.607	0.591
-0.724	1.77	-0.805	-0.496		0.269	-0.815	-0.0554	0.138	0.758
-0.584	1.9	-1.21	-0.328		0.0861	-0.85	-1.09	0.769	0.225
-0.534	1.88	-0.772	-1.01		0.365	-0.885	1.09	0.952	0.491
-0.45	1.79	-1.16	0.148		0.536	-0.0634	-0.993	-0.179	1.14
-0.514	1.62	-1.36	-0.184		0.333	-0.193	0.614	-1.12	0.511
-0.523	1.54	-1.64	-0.612		0.445	0.274	-0.115	-0.96	2.18
-0.238	1.53	-0.864	-0.745		0.584	0.437	1.41	-0.948	1.6
0.0956	1.44	-0.334	-0.984		0.272	-0.248	0.274	-0.32	1.61
-1.01	1.72	-0.529	-0.546		0.0357	-0.441	-0.365	0.823	0.127
-0.775	2.03	-0.542	0.137		0.403	-0.455	0.821	0.203	0.297
-0.372	1.91	-1.52	0.0853		0.614	-0.635	1.17	-0.35	0.864
-0.176	1.65	-1.52	-0.586		0.488	-0.872	-0.2	-0.565	1.77
-0.92	1.41	-1.43	-0.498		0.393	-0.463	-0.378	-0.574	1.89
-1.42	1.4	-0.743	-0.185		0.271	0.747	-0.105	-0.548	2.09
-0.524	1.11	-1.65	-0.203		0.694	0.954	0.893	-1.23	1.22
-0.218	1.74	-0.2	0.305		1.9	0.341	0.863	-0.709	2.62
-1.02	1.93	-0.129	1.07		2.32	0.048	0.938	-1.14	0.777
-0.894	2.06	-1.19	0.766		2.09	0.849	0.856	-0.667	1.94
-0.548	1.85	-1.68	0.905		1.54	0.0324	0.291	0.146	1.72
-0.694	1.5	-0.776	0.64		1.19	0.373	0.943	-0.119	0.504
-0.712	0.79	-1.44	-0.299		1.2	0.341	0.372	0.19	1.99
-0.973	0.544	-1.21	-0.0376		0.965	-0.292	0.896	-0.752	0.658
-0.246	0.983	-1.47	1.07		0.931	0.788	0.778	0.592	-0.0278
-0.124	0.472	-0.703	1.44		0.545	0.395	0.883	0.824	1.19
-0.709	0.616	-0.646	1.11		0.295	0.727	0.217	0.015	0.723
-0.754	0.869	-0.946	0.807		0.504	-0.329	0.284	-0.134	2.06
-0.488	1.06	-1.62	0.313		0.362	0.00193	0.78	0.798	2.68
-0.532	1.18	-0.914	-0.132		0.942	-0.315	-0.0293	0.67	1.89
-1.34	0.919	-1.04	-0.223		0.573	0.124	1.39	0.749	1.69
-1.23	0.0192	-1.37	-0.443		0.871	-0.16	1.69	1.05	2.29
-1.23	-0.0164	-1	-0.0605		0.462	-0.159	2.68	0.407	1.99
-1.18	-0.546	-0.397	0.132		0.594	-0.176	-0.0607	0.135	1.07
-1.01	-0.375	-1.35	0.246		0.572	-0.0408	-0.103	0.899	1.71
-1.15	-0.452	-1.13	0.677		0.777	-0.491	0.853	0.585	0.987
-0.652	-0.549	-0.659	0.355		0.518	-0.564	1.14	0.272	2.29
-0.869	-0.294	-1.21	0.68		0.444	-0.549	0.0406	0.309	1.91
-0.716	0.0486	-0.935	0.351		0.333	-0.82	-0.152	0.364	2.84
-0.75	-0.0929	-1.14	0.347		-0.121	-0.973	0.136	0.283	2.47
-0.609	0.228	-0.619	0.226		0.163	-0.742	0.947	-0.015	0.996
0.344	0.135	-0.178	0.27		0.128	-0.454	0.203	0.139	2.26
0.602	-0.132	-0.728	0.15		-0.156	-0.382	0.202	0.873	2.09
0.0181	0.956	-0.132	-0.0818		0.309	-0.196	-1.3	0.831	0.655
-0.293	0.988	-0.413	0.409		-0.0911	0.282	-0.862	2.12	1.62
0.128	1.27	-0.725	0.18		0.416	0.115	-1.16	1.94	2.01
-0.0276	0.855	-0.669	0.0127		-0.158	-0.105	-1.06	2.61	1.54
0.333	0.859	-0.484	0.8		0.88	0.0233	-0.524	2.14	1.94
0.449	0.749	-0.59	1.42		0.53	0.297	-0.483	2.99	2.28
-0.15	0.834	-0.556	0.653		0.0443	0.318	-0.106	1.86	1.37
-0.171	0.77	-0.186	-0.0595		0.4	0.637	0.508	2.79	2.09
-0.54	0.563	-0.478	0.592		-0.114	0.93	0.0647	2.2	-0.376
-1.1	0.935	-0.371	0.253		-0.269	-0.00148	-0.585	3.05	0.9
-1.11	0.721	-0.957	0.27		-0.0387	0.623	-0.101	2.75	1.16
-1.2	0.807	-0.742	0.476		-0.0971	0.56	-1.77	2.09	0.739
-0.946	0.342	-1.05	0.179		-0.366	0.416	1.47	2.52	2.56
-1.61	0.562	-1.58	-0.149		-0.681	0.308	-0.798	2.51	0.0765
-1.11	0.311	-1.62	0.289		-0.0988	0.346	-0.47	2.59	0.132
-0.983	-0.0293	-1.56	-0.331		-0.315	0.422	-0.698	2.18	-0.391
-0.946	-0.0789	-1.59	-0.231		0.0524	0.137	0.581	2.64	0.973
-0.441	0.0944	-0.936	0.0664		-0.278	0.0397	-1.18	1.87	0.261
-0.0709	-0.124	-1.29	0.411		-0.176	-0.309	0.131	1.55	0.45
-0.732	0.00653	-0.623	0.444		-0.511	-0.394	0.933	1.38	0.792
-0.77	0.397	-1.13	0.306		-0.27	0.0336	-0.0594	1.12	0.25
-0.621	0.658	0.198	-0.31		0.346	0.283	-0.334	0.689	0.0654
-1.28	0.466	-0.434	-0.193		0.411	0.304	0.784	1.68	0.0668
-1.15	0.218	0.43	-0.244		0.379	-0.0774	-1.23	2.05	-0.759
-0.566	0.339	-0.588	-0.27		0.295	-0.0959	-0.264	1.14	-0.673
-0.163	0.67	0.245	-0.188		0.56	-0.0521	0.0398	1.17	-0.102
0.002	0.922	-0.227	-1.31		0.741	0.406	-0.584	1.96	-2.04
0.107	0.449	-0.837	-0.998		0.309	0.712	-1.67	0.773	-0.0844
0.103	0.168	-0.538	-0.464		0.375	0.777	-0.308	1.03	0.863
0.694	0.658	0.167	-0.367		0.388	0.536	-0.542	0.965	0.282
0.0923	1.31	-0.319	-0.318		0.235	0.749	0.242	1.78	0.135
0.213	1.87	-0.37	-0.19		0.0809	0.775	1.38	2.27	-0.184
0.0659	1.34	-0.274	-0.161		0.36	0.258	-1.82	1.75	1.24
0.294	0.937	-0.603	-0.234		0.424	0.588	0.399	1.51	-0.181
0.103	0.949	-0.449	-0.989		1.27	1.06	-0.0852	1.55	0.607
0.182	0.921	-0.972	-0.798		1.09	0.73	1.17	1.61	0.216
0.487	1.06	-0.906	-0.387		0.263	-0.0493	2.35	1.9	-0.348
0.312	1.36	-0.441	-0.855		0.661	0.585	-0.273	1.49	-0.711
0.588	1.35	-0.312	-0.727		0.667	0.0789	0.668	1.63	-0.762
0.783	1.02	-0.708	-0.184		0.143	-0.0117	0.669	1.92	0.0221
0.854	0.856	-1.15	-0.502		0.501	0.161	0.386	1.59	-0.287
0.428	0.176	-0.6	-0.677		0.929	-0.0494	0.646	3.26	-0.707
1.36	0.596	-0.69	-0.551		-0.475	-0.101	-0.0179	2.35	0.176
0.712	0.456	-0.771	-0.338		-0.246	-0.166	0.178	1.33	-0.102
0.729	0.626	-0.049	-0.37		0.213	-0.435	-0.583	0.909	-0.44
0.914	0.452	-0.945	-0.334		0.143	-0.713	-0.194	0.736	0.277
1.41	0.546	-0.64	-0.89		0.693	-0.737	-0.24	1.37	-0.594
1.15	0.268	-0.71	-1.06		0.162	-0.556	-1.93	0.918	-0.899
0.432	0.42	0.114	-0.827		-0.0219	-0.61	-0.0108	-0.254	0.484
-0.382	0.605	0.226	-1.25		0.354	-0.00872	0.984	0.104	0.675
0.0143	0.508	0.236	-1.48		0.257	-0.163	1.45	1.11	-1.81
-0.835	1.16	-1.12	-1.75		-0.13	-0.461	0.28	0.0869	-0.82
-0.716	1.97	-0.921	-1.73		0.383	-0.449	-0.724	-0.268	0.41
-0.416	1.56	-1.41	-0.605		0.0594	-0.139	-0.119	0.0925	0.664
0.112	0.701	-0.721	-0.74		0.111	0.136	0.408	-0.174	1.01
0.153	0.532	-0.666	-0.75		0.52	-0.433	-1.13	0.384	0.397
-0.754	0.485	0.467	0.0637		0.121	-0.336	0.363	-0.101	-0.175
0.337	0.241	-0.146	-0.000911		0.0537	1.09	0.134	0.623	-0.267
0.0088	0.0186	-0.237	-0.807		0.237	2.52	1.19	-0.395	-0.0529
0.905	0.0596	0.143	-1.36		0.218	2.18	-0.954	0.217	-0.0593
0.517	0.0374	-0.741	-0.799		-0.522	2.29	0.74	0.64	0.202
0.522	-0.357	0.277	-0.223		0.399	2.37	0.00881	-0.0947	0.171
0.0812	0.0135	-0.366	0.533		0.451	2.15	-0.186	-1.29	0.314
0.249	0.191	-0.29	0.0337		-0.187	1.84	-0.716	-0.0318	0.61
0.139	-0.111	0.323	0.517		-0.454	1.63	0.996	0.267	0.0524
0.154	-0.313	-0.119	-0.0849		0.119	1.27	0.271	0.384	-0.429
-0.46	-0.266	0.979	0.135		0.526	1.49	0.398	0.0471	0.341
-0.675	-0.0833	2.45	0.355		-0.839	1.71	0.336	0.393	0.812
-0.732	0.528	3	-0.749		-0.832	1.35	0.963	0.469	0.431
-0.897	0.665	3.28	-0.217		-0.673	1.22	1.2	-0.255	2.63
-1.59	0.857	3.45	-1.12		-0.135	0.894	0.694	-0.123	1.89
-0.992	0.533	3.54	-1.16		0.241	0.638	0.231	0.227	2.4
-0.174	1.22	2.28	-0.514		0.0524	0.532	0.735	0.395	1.71
0.468	0.993	1.81	-0.351		-0.134	0.796	0.255	-0.0752	1.69
-0.519	1.35	1.4	-0.969		-0.889	0.454	0.478	0.586	0.892
0.127	0.784	1.06	-0.558		-0.791	0.89	1.48	-0.102	0.738
0.734	0.657	0.704	-0.578		-0.729	0.205	0.438	1.04	1.3
-0.554	0.74	0.68	-1.14		-0.128	0.234	0.911	-0.345	0.433
-0.789	1.1	0.747	-1.21		0.0774	0.174	0.34	-0.629	1.2
-0.749	1.76	1.19	-0.832		0.273	0.669	0.445	-0.375	0.574
-0.00533	1.69	1.12	-0.301		0.126	0.525	0.397	-0.607	0.226
-0.0494	1.92	0.747	-0.674		0.36	0.224	0.197	-0.0607	-0.672
-0.81	1.82	0.535	-0.841		-0.637	0.323	1.13	-0.283	0.464
-0.224	1.55	0.901	-0.683		-0.398	0.237	0.0492	-0.178	-0.149
-0.663	1.93	0.689	-0.18		-0.0799	0.377	0.323	0.543	1.03
0.315	1.83	0.601	-0.0706		-0.507	0.268	-0.292	-0.942	0.256
-0.467	1.44	0.648	0.174		-0.989	-0.0542	-0.685	-0.174	1.21
-0.637	1.89	-0.172	-0.556		-1.17	-0.153	-0.948	0.0946	1.9
-0.227	2.16	0.349	-0.844		-0.434	-0.537	0.839	0.271	1.87
-0.686	2.19	0.312	-0.272		-1.26	-0.763	-0.18	0.594	0.918
-0.212	1.9	-1.17	-0.0399		-0.0335	-0.349	0.0651	0.876	1.11
-0.0742	2.25	0.0977	0.0157		-0.716	1.24	-0.118	0.618	0.446
0.0796	1.43	0.297	-0.898		0.204	1.59	-0.266	-0.0554	0.644
0.0135	1.86	-0.6	-1.06		-0.451	1.95	-0.836	-0.402	0.364
-0.345	1.54	0.361	-1.03		-0.366	2.14	-0.678	0.634	0.258
-0.368	1.35	0.419	-0.658		-0.465	0.61	-0.798	1.2	0.65
0.143	1.26	-0.472	-0.752		-0.346	0.363	-0.882	-0.104	2.18
0.26	1.18	-1.04	-1.05		-0.388	0.43	-0.591	0.691	2.11
0.0764	1.22	-1.22	-1.29		-0.145	0.432	0.913	0.0992	0.459
-0.116	1.28	-0.993	-0.326		-1	0.292	-1.07	0.471	0.872
0.0644	1.35	-1.05	-0.119		-1.02	0.163	-0.76	0.689	1.72
0.15	1.61	-0.48	-0.0141		-0.195	0.528	-0.0466	-0.152	2.32
0.436	1.48	-1.47	-0.708		-0.493	0.133	0.789	-0.668	0.732
0.301	1.36	-0.759	-0.474		-0.691	0.191	-1.03	-0.867	0.647
0.613	1.31	-1.45	-1.33		-0.227	0.861	0.102	-0.211	0.423
0.43	1.52	-1.2	-1.79		-0.585	1.96	-0.923	-0.655	0.653
0.77	0.975	-1.56	-1.77		-0.388	1.88	-0.297	-0.0245	0.662
0.367	1.24	-1.32	-1.63		-0.753	1.54	-0.103	-0.192	0.662
0.672	1.25	-0.231	-1.98		-1.14	2.02	-0.599	-0.42	0.761
-0.388	0.768	-0.22	-1.43		-1.22	1.99	0.0551	-0.804	1.27
-0.758	1.32	-1.01	-1.01		-0.923	2.11	-0.0236	-0.656	1.07
-0.266	1.34	-1.4	-0.485		-1.19	1.5	0.387	-1.22	0.424
-0.645	0.974	-0.83	-1.05		-0.382	1.5	-0.244	-1.38	-0.349
-0.503	1.09	-0.565	-0.31		-0.352	1.5	0.459	-0.954	-0.471
-0.224	0.902	-1.15	-0.0844		-0.269	1.55	-1.14	-0.745	0.25
-0.0784	0.816	-0.65	-0.513		-0.914	1.34	0.0404	-1.59	1.03
-0.0385	0.725	-1.51	-0.909		-0.23	0.593	0.271	-0.334	0.0591
-0.0851	0.866	-0.496	-0.923		-0.136	0.305	0.749	-1.57	1.04
-0.67	0.983	-1.01	-1.2		-0.471	0.169	0.934	-1	-0.288
-0.756	1.05	-1.02	-1.12		-0.485	0.142	0.704	-1.12	-0.459
-0.485	1.09	-1.14	-1.55		0.354	-0.37	0.815	-1.1	0.551
-0.496	0.755	0.0373	-1.89		-0.502	-0.216	-0.112	-0.8	0.172
-0.588	0.503	-0.487	-1.43		-0.623	-0.196	-1.17	-1.06	0.581
-0.875	0.638	0.347	-1.38		-0.543	-0.148	1.45	-1.43	0.384
-0.545	0.786	-0.0258	-1.34		-0.0753	-0.655	-0.126	-0.578	0.554
-0.697	0.516	-0.465	-1.03		0.202	-0.857	2.93	-0.779	0.767
-0.881	0.795	-1.53	-0.922		0.253	-0.532	0.382	-1.2	0.407
-0.756	1.33	-0.693	-0.256		-0.122	-0.474	0.307	-0.338	0.507
-0.615	1.44	-0.587	-0.957		-0.0342	-0.0649	0.439	-1.15	0.848
-0.595	1.36	-0.181	-1.46		-0.109	-0.736	0.198	-0.736	1.28
-0.578	0.696	-0.127	-1.51		-0.00302	-0.164	2.54	-0.219	1.05
0.161	0.213	-0.754	-0.967		-0.797	-0.883	0.582	0.259	1.36
0.0755	0.239	-1.35	-1.38		-0.127	-1.3	0.955	-0.956	2.14
-0.266	-0.156	-1.08	-0.804		-0.335	-0.86	0.27	-0.00505	0.861
-0.0745	-0.141	-1.38	-1.19		-0.652	-0.742	0.347	0.467	1.88
-0.37	-0.541	-1.53	-0.928		-0.0571	-1.03	2.28	-0.48	0.362
-0.649	-0.534	-1.25	-0.0477		-0.22	-0.805	1.33	0.0307	-0.0292
-0.65	-0.687	-1.22	-0.347		-0.462	-0.49	1.73	-0.102	1.32
-1	-0.862	-1.19	0.379		0.0843	-1.26	2.42	-0.868	0.526
-0.803	-1.21	-1.31	-0.159		0.124	-1.48	2.54	-0.613	0.109
-0.767	-0.906	-2.19	-0.516		-0.804	-1.25	2.67	0.172	0.315
-1.38	-0.972	-1.55	0.909		0.174	-0.649	2.4	-0.446	0.838
-2.13	-0.66	-1.78	0.0339		0.000635	-0.613	2.16	-0.95	0.573
-1.43	-0.767	-1.29	0.422		0.431	-0.963	2.13	-0.932	-0.844
-1.79	-0.358	-1.18	-0.186		1.03	-0.817	1.04	-1.02	-0.269
-1.4	-0.161	-0.987	-0.375		1.02	-0.161	2.54	-0.443	-0.638
-1.36	0.372	-1.47	0.36		0.382	-0.0672	1.52	-0.8	0.0722
-0.902	-0.0557	-1.51	-0.357		0.51	0.275	0.981	-1.17	-1.15
-1.21	0.332	-1.53	-0.141		0.971	0.192	1.13	-1.36	-0.41
-0.805	0.653	-1.06	-0.306		0.882	0.321	1.36	-0.729	-0.296
-0.554	0.782	-0.636	-0.233		0.916	0.181	1.62	-1.72	-0.763
-0.193	0.615	-0.853	-0.752		0.362	-0.0366	-0.826	-1.35	0.144
-1.21	0.777	-1.26	-0.685		0.622	-0.214	-0.513	-0.993	0.139
-0.884	0.499	-1.16	-0.0431		0.19	0.795	0.466	-1.07	-0.406
-1.1	0.652	-0.86	-0.145		0.914	-0.0232	0.836	-0.163	1.61
-0.816	0.282	-0.701	-0.15		0.502	-0.348	0.172	-0.832	-0.116
-1.46	0.353	0.436	-0.636		-0.0345	-0.941	1.69	-1.06	0.549
-1.45	0.43	0.326	-0.657		0.0453	-0.1	2.06	-1.75	-0.0195
-1.49	0.553	-0.329	-1.21		0.00259	-0.0221	0.468	-0.291	1.14
-1.05	0.46	-0.126	-0.586		-0.611	0.919	1.16	-1.45	-0.45
-0.591	0.542	0.601	-0.61		0.545	1.67	0.951	-0.32	-0.18
-1.66	0.707	1.71	-0.666		1.37	2.09	1.8	-0.433	0.25
-1.8	0.452	1.1	-0.572		0.974	1.74	2.26	-0.109	-0.239
-0.623	0.00782	1.84	-0.579		1.1	1.58	1.35	0.52	-0.00927
-1.55	0.175	1.91	-0.479		1.08	1.97	1.7	1.73	-0.0231
-1.42	-0.357	0.95	-0.849		1.78	1.94	0.337	-0.0204	1.3
-1.37	0.221	1.52	-0.821		1.55	1.52	0.218	0.212	0.558
-0.708	0.453	1.1	-0.754		2.15	1.22	1.72	0.0825	0.902
-0.637	0.281	1.33	-0.831		1.77	0.942	0.429	0.604	0.469
-0.69	0.264	0.706	-1.33		1.2	0.984	0.616	-0.133	0.559
-1.37	0.375	1.35	-0.83		1.21	0.269	1.55	0.185	-0.17
-0.613	0.333	0.169	-0.533		0.68	0.91	0.749	1.22	1.52
-0.84	0.473	-0.367	-0.45		1.63	0.761	0.702	-0.118	1.03
[truncated: 7,151 more rows]
