# Supplementary material for: Metabolic sensing in AgRP neurons integrates homeostatic state with dopamine signalling in the striatum
Source: eLife journal article supplement (doi:10.7554/elife.72668), 2022-01-12
Supplement: fig1-figsupp1-data1 [file FigS1L.xlsx]

## Sheet: Sheet1
	WT								KO
fed	-0.698572	-0.0263139	-2.08979	-1.51759	-0.513861				-1.52437	-0.735492	-0.906469	-2.18612
fasted	-0.0622363	-1.06047	2.30796	1.0807	0.63748				0.270061	-0.0934018	-1.12328	-0.900558	-2.13999
