# Supplementary material for: Metabolic sensing in AgRP neurons integrates homeostatic state with dopamine signalling in the striatum
Source: eLife journal article supplement (doi:10.7554/elife.72668), 2022-01-12
Supplement: fig1-figsupp2-data1 [file elife-72668-fig1-figsupp2-data1-v2.zip]

## Sheet: Sheet1
Agrp Cre										Agrp Crat
-0.0404	2.28	-0.497	2.02	2.29	-0.0417	0.03	-0.517			-0.562	-0.482	2.34	0.91	0.618	-0.628
0.615	2.54	-0.548	1.41	2.19	0.981	-0.0451	-0.411			-0.596	-1.21	2.73	0.997	0.511	-0.639
0.404	1.74	-0.781	1.42	2.23	1.4	0.12	-0.143			-0.588	-0.795	2.78	1.02	0.956	-1.05
0.869	1.49	0.108	1.35	1.89	0.573	-0.00932	-0.736			-0.525	-0.553	2.75	1.2	0.426	-0.559
0.63	1.56	-0.789	1.38	2.28	0.251	-0.143	0.364			-0.593	-1.07	2.71	1.39	0.622	-0.686
0.681	1.03	-0.491	0.739	2.59	0.912	0.0764	0.347			-0.44	-0.6	2.7	1.37	0.418	-1.06
0.463	1	-0.202	1.08	1.97	1.42	0.197	-0.165			-0.546	-0.762	2.69	1.23	0.911	-1.15
0.088	2.02	0.117	0.549	1.99	1.42	0.0245	-0.128			-0.684	-0.722	2.58	0.837	0.81	-1.72
0.697	1.72	-0.0983	0.529	2.54	1.06	0.138	-0.404			-0.544	-1.15	2.25	0.586	1.13	-0.726
0.639	1.48	0.476	0.522	2.24	0.874	0.262	-0.574			-0.607	-1.16	2.29	0.604	1.08	-1.55
0.184	1.9	-0.365	0.4	1.76	0.752	0.206	0.0545			-0.521	-0.886	2.03	0.325	0.961	-1.21
0.605	2.59	1.1	0.496	1.87	0.891	-0.344	0.267			-0.599	-0.45	2.13	0.0916	1.02	-1.15
0.731	2.18	1.03	0.876	1.6	0.627	-1.14	-0.282			-0.727	-0.686	1.93	0.208	1.7	-0.534
0.554	2.02	0.26	1.01	1.2	0.408	-1.31	-0.498			-0.735	-0.583	1.95	0.213	1.38	-0.735
0.488	1.76	1.05	0.984	1.69	0.701	-0.689	-0.734			-0.763	-0.688	1.84	0.264	0.867	-0.953
0.205	1.05	0.132	1.11	2.16	1.09	-0.577	-0.397			-0.67	-0.988	1.5	-0.00146	0.421	-0.946
-0.167	1.21	0.219	0.803	1.99	0.984	-0.964	-0.63			-0.57	-0.989	1.64	-0.153	0.727	-1.02
0.601	0.656	0.999	0.787	1.78	0.474	-0.559	-0.491			-0.552	-0.89	1.58	-0.21	0.907	-1.35
0.452	0.606	1.45	0.864	1.39	0.355	-0.0877	-0.903			-0.532	-0.858	1.45	-0.274	1.37	-1.32
0.463	0.663	-0.469	1.57	1.53	0.459	-0.642	-0.207			-0.591	-0.971	1.59	-0.0739	1.04	-0.602
0.183	0.332	-0.164	0.894	1.8	0.917	-1.13	-0.934			-0.672	-1.7	1.47	0.146	1.49	-0.828
0.953	0.919	-0.636	1.26	1.98	1.09	-0.426	-0.544			-0.777	-1.38	1.55	0.369	1.24	-1.35
-0.016	0.356	-0.109	0.648	1.99	0.933	-0.0173	-0.812			-0.767	-0.998	1.41	0.471	1.79	-0.986
0.238	0.737	0.385	0.662	1.93	0.927	-0.306	-0.498			-0.745	-1.21	1.22	0.521	1.75	-0.915
0.264	0.941	-0.479	0.528	1.97	0.643	-0.123	-0.336			-0.662	-0.792	1.27	0.468	0.909	-1.2
0.297	1.34	-0.43	0.948	1.86	-0.0817	-0.0498	-0.316			-0.759	-1.44	1.23	0.433	1.4	-0.742
0.058	1.6	-0.759	0.693	2.31	0.194	-0.597	-0.529			-0.728	-0.468	1.02	0.391	2.04	-1.2
0.0314	2.16	-0.0317	0.675	2.57	0.983	-0.851	-0.31			-0.668	-1.28	1.14	0.392	1.68	-0.69
0.698	1.54	-0.482	0.625	2.39	0.62	-0.679	-0.413			-0.541	-1.16	0.866	0.475	-0.0715	-0.722
0.51	2.67	0.883	0.652	2.54	-0.328	-0.288	-0.32			-0.577	-1.37	1.09	0.192	1.77	-0.983
0.149	3.28	-0.708	0.791	2.28	-0.0195	-0.43	-0.672			-0.405	-0.64	0.657	0.195	1.35	-1.23
0.162	2.28	-0.0968	0.469	1.33	0.595	-0.76	-0.3			-0.459	-1	0.856	0.442	1.38	-1.16
0.416	2.8	0.395	0.487	1.49	0.724	-0.466	-0.442			-0.384	-1.15	0.941	0.552	1.52	-1.25
0.288	2.86	0.0474	1.13	1.92	0.484	-0.651	-0.328			-0.445	-0.901	1.07	0.552	2.08	-1.42
0.533	2.64	0.328	0.541	1.5	-0.451	-0.843	-0.593			-0.44	-0.704	0.933	0.447	1.49	-1.1
0.633	2.44	0.376	0.723	1.29	-0.309	-0.515	-0.141			-0.495	-0.454	0.629	0.522	2	-0.946
0.531	2.25	0.145	0.574	1.93	0.924	-0.0896	-0.22			-0.478	-1.1	0.787	0.629	2.22	-1.49
0.35	1.98	-0.448	1.2	1.93	0.94	0.0577	-0.799			-0.328	-0.433	0.723	0.533	1.83	-1.24
0.421	2.04	1.26	0.896	1.53	0.377	-0.399	-0.26			-0.407	-0.862	0.671	0.418	1.46	-1.15
0.72	2.35	0.0317	1.21	1.62	0.411	-0.399	-0.541			-0.615	-1.32	0.523	0.452	1.36	-0.0695
0.864	1.54	0.385	0.904	1.76	0.912	0.236	-0.0682			-0.545	-0.9	0.651	0.574	1.33	0.0877
0.737	2.22	0.38	0.675	2	1.32	-0.00712	-0.319			-0.575	-0.928	0.62	0.447	0.943	0.142
0.385	2.61	0.647	0.511	2.34	1.41	-0.374	0.0625			-0.464	-1.48	0.528	0.37	1.78	0.658
0.742	1.55	0.413	0.52	2.31	1.96	0.163	-0.207			-0.704	-1.32	0.543	0.404	1.51	0.247
0.933	1.61	-0.883	1.18	2.23	2.54	0.791	-0.336			-0.516	-1.91	0.54	0.431	1.26	0.395
0.735	1.64	-0.509	1.26	1.9	2.71	0.9	-0.595			-0.21	-1.12	0.566	0.387	0.73	0.0983
0.601	1.56	-0.0861	1.07	1.41	2.39	0.47	0.156			-0.361	-0.977	0.821	0.362	0.807	-0.281
1.23	1.87	-0.638	0.987	1.7	2.3	0.447	0.491			-0.242	-1.42	0.673	0.255	1.27	-0.113
1.47	1.42	-0.0392	1.47	1.86	1.95	1.09	0.127			-0.282	-1.59	0.885	0.226	0.673	-0.375
2.12	2.04	0.659	1.55	1.49	1.71	1.52	-0.177			-0.34	-1.26	0.808	0.228	1.09	-0.478
1.68	2.35	-0.283	1.21	1.54	1.86	1.2	0.155			-0.208	-1.24	0.454	0.162	1.02	-0.59
1.98	2.46	-0.241	0.786	2.19	1.86	0.698	0.239			-0.322	-1.1	0.713	-0.104	0.994	-0.768
1.43	2.33	0.617	1.1	1.84	1.37	0.647	0.383			-0.204	-0.695	0.646	-0.228	1.53	-0.443
1.39	2.27	0.809	1.1	1.11	1.58	1.3	0.531			-0.135	-1.51	0.747	-0.1	1.32	-0.8
1.74	1.78	0.975	0.51	1.08	2.37	1.12	-0.259			-0.141	-1.72	0.666	-0.116	2.18	-0.524
1.5	1.97	0.719	1.13	1.7	1.85	0.491	0.556			-0.113	-1.62	0.567	-0.198	2.35	-0.572
1.73	1.3	1.03	1.09	2.23	0.729	0.416	0.146			-0.204	-0.857	0.411	-0.444	1.73	-0.647
1.29	1.63	1.04	0.852	2.03	0.661	0.361	-0.501			-0.28	-1.73	0.518	-0.385	2.06	-0.35
1.1	0.984	0.825	0.747	1.77	1.1	-0.00445	0.19			-0.232	-1.32	0.739	-0.381	1.88	-0.717
1.86	0.902	0.36	1.37	1.98	1.24	0.227	-0.601			-0.083	-1.05	0.422	-0.519	2.03	-0.658
1.71	1.4	-0.307	1.02	2.18	1.59	0.815	-0.534			-0.283	-1.47	0.28	-0.514	1.78	-0.297
1.45	1.04	1.67	1.11	2.13	1.74	0.456	-0.096			-0.367	-1.37	0.371	-0.542	1.45	-0.988
1.56	0.579	0.0968	1.46	1.95	1.24	-0.139	-0.107			-0.234	-0.764	0.627	-0.552	1.6	-1.11
1.38	-0.14	0.891	1.41	1.21	0.969	0.273	-0.75			-0.4	-0.856	0.573	-0.681	1.93	-1.09
1.23	0.659	0.733	1.53	0.902	0.79	1.18	-0.843			-0.252	-1.97	0.49	-0.667	1.51	-1.23
1.39	0.31	-0.292	1.29	1.48	0.238	0.97	-0.131			-0.269	-1.8	0.731	-0.958	1.72	-0.734
1.49	0.216	0.385	1.34	1.86	0.496	0.222	-0.848			-0.232	-1.43	0.549	-1	2.1	-0.925
1.56	0.235	0.852	1.33	1.98	1.11	0.477	-0.766			-0.367	-0.812	0.399	-1.33	1.92	-1.26
1.08	-0.21	0.981	1.21	2.28	0.757	0.248	-0.805			-0.446	-0.19	0.433	-1.19	1.65	-0.872
1.29	0.0208	0.513	1.42	2.56	0.462	-0.119	-0.317			-0.376	-0.161	0.0883	-1.19	1.66	-0.723
1.25	0.828	-0.3	1.03	2.41	0.909	0.306	-1.12			-0.487	0.728	0.533	-1.1	1.94	-1.19
1.51	1.37	0.375	0.842	2.25	1.73	0.546	-1.01			-0.401	0.36	0.293	-1.18	1.55	-1.08
1.46	1.03	-0.0201	0.829	2.32	1.44	0.472	-0.93			-0.313	0.167	0.61	-1.39	1.77	-1.2
1.23	2.23	0.122	0.939	2.47	0.176	0.787	-0.949			-0.31	0.266	0.391	-1.27	1.84	-0.702
1.52	2.6	-0.141	1.13	2.77	0.185	0.67	-0.981			-0.328	0.284	0.311	-0.822	1.78	-0.825
1.99	3.31	-0.252	0.828	2.88	0.847	0.217	-0.775			-0.421	-0.204	0.376	-0.65	1.51	-0.898
1.66	3.33	-0.173	0.573	2.31	0.469	-0.252	-0.71			-0.58	0.0312	0.42	-0.413	1.11	-1.38
1.88	3.85	1.14	0.355	1.77	0.327	-0.506	-0.55			-0.575	-0.0873	0.702	-0.429	2.16	-0.692
1.9	3.81	0.474	0.238	2.33	0.666	-0.251	-0.611			-0.684	0.0168	0.685	-0.505	1.56	-0.458
2.45	3.19	-0.242	0.689	2.61	0.283	0.0701	-1.17			-0.463	-0.97	0.524	-0.565	1.98	-0.372
2	3.04	0.579	1.09	2.04	0.249	0.177	-1.04			-0.471	-0.331	0.635	-0.644	1.64	-0.793
1.74	3.13	0.315	1.29	2.13	0.403	0.243	-0.48			-0.392	-0.339	0.631	-0.767	1.25	-0.00391
2.32	3.31	1.1	1.11	2.61	-0.358	0.637	0.325			-0.381	0.259	0.513	-0.737	1.3	-0.247
1.79	2.31	1.05	1.46	2.66	-0.528	0.678	-0.151			-0.406	-0.195	0.426	-0.665	1.19	-0.0319
2.09	2.6	1.38	1.2	1.94	0.669	0.247	-0.0759			-0.526	-0.238	0.45	-0.746	1.59	0.0253
1.83	2.47	1.44	1.27	1.24	0.669	0.292	-0.262			-0.474	-0.643	0.598	-0.676	1.69	-0.0406
2.14	2.64	0.8	1.28	1.58	-0.163	0.164	-0.116			-0.476	-0.726	0.383	-0.576	1.56	-0.109
2.18	2.77	1.13	1.74	2.28	0.369	-0.299	-0.343			-0.413	-0.556	0.371	-0.51	1.77	-0.239
1.95	2.88	0.888	0.803	2.2	0.811	-0.132	-0.399			-0.579	-1.38	0.516	-0.527	1.13	-0.499
1.65	2.56	1.11	1.1	1.49	0.723	0.139	-0.594			-0.613	-1.07	0.406	-0.448	1.32	-0.563
1.44	2.72	0.673	1.05	1.17	0.453	0.581	-0.314			-0.493	-0.804	0.397	-0.393	1.03	-0.352
2.33	2.34	0.708	1.1	1.75	0.448	0.87	-0.13			-0.523	-0.707	0.55	-0.36	0.785	-0.424
1.63	2.55	1.1	1.12	1.79	0.714	0.282	-0.135			-0.513	-0.747	0.482	-0.28	1.04	-0.606
1.44	1.99	-0.0179	1.5	0.999	1.13	-0.328	-0.566			-0.738	-0.71	0.542	-0.223	1.01	-0.436
1.62	2.57	-0.618	1.03	0.556	2.1	-0.339	-0.54			-0.397	-0.545	0.867	-0.154	0.914	-0.869
1.34	2.12	-0.111	1.63	1.52	1.78	0.0743	-0.227			-0.44	-0.621	0.708	-0.16	0.876	-0.11
1.54	2.4	0.746	1.52	2.17	0.792	0.538	-0.9			-0.455	-0.802	0.448	-0.263	1.07	-0.413
1.98	2.16	0.849	1.99	1.21	0.886	0.251	-0.325			-0.556	-0.512	0.314	-0.273	1.01	-0.753
1.74	2.22	0.759	1.17	0.738	1.99	-0.0903	-0.798			-0.49	-0.725	0.77	-0.278	1.35	-0.811
1.82	2.6	0.368	0.912	1.4	2.45	0.525	0.00317			-0.541	-0.751	1.15	-0.287	0.88	-0.881
1.52	2.79	0.366	1.48	1.45	1.75	1.11	-0.752			-0.526	-0.976	1.03	-0.322	1.06	-0.453
1.3	2.42	0.0843	1.32	0.872	1.12	1.05	-0.29			-0.292	-0.69	1.29	-0.271	0.442	-0.469
2.03	2.38	1.43	1.88	0.58	0.78	0.608	-0.731			-0.431	-1.37	0.944	-0.288	0.999	-0.315
1.41	1.32	0.172	1.79	0.637	1.12	0.574	-1.24			-0.442	-1.2	1.11	-0.284	0.606	-0.448
1.15	1.26	0.223	1.94	0.456	1.49	1.09	-0.586			-0.482	-0.639	1.09	-0.278	0.549	-0.0772
1.54	1.11	0.605	2.2	0.276	0.852	1.07	-0.326			-0.586	-0.73	1.01	-0.313	0.493	-0.0261
1.6	0.848	-0.175	1.82	0.593	0.408	0.416	-0.642			-0.645	-0.496	1.16	-0.254	0.318	-0.396
0.982	0.391	0.15	1.43	1.07	0.93	0.329	-0.713			-0.673	-0.571	1.19	-0.0318	0.659	-0.432
1.34	0.917	-0.185	1.72	0.928	1.03	0.662	-0.351			-0.654	-0.955	0.907	-0.0421	0.295	0.616
1.47	0.995	-0.6	1.45	0.61	0.19	0.534	-0.992			-0.713	-0.152	0.87	0.00523	0.785	-0.0103
0.922	0.786	0.833	1.78	0.53	0.155	0.789	-0.679			-0.604	-0.224	0.714	-0.0361	0.288	-0.461
1.11	1.21	-0.409	1.14	0.368	0.975	1.16	-0.789			-0.641	-0.534	0.907	-0.0904	0.798	-0.379
1.19	0.786	-0.0544	1.29	-0.00243	0.789	0.92	-0.372			-0.698	-0.888	0.686	-0.192	0.109	-0.586
1.11	0.229	-0.474	1.65	-0.151	-0.0708	0.199	-0.573			-0.698	-0.734	0.853	-0.133	-0.281	-0.655
0.9	0.526	-0.8	1.11	0.028	-0.271	-0.597	-0.326			-0.696	-0.535	0.877	-0.141	-0.0958	-0.314
1.24	0.204	-0.579	1.53	0.305	0.29	-0.291	-0.568			-0.701	-0.858	0.803	0.00644	0.311	-0.748
1.45	-0.151	-0.488	0.65	0.0676	0.312	0.575	-0.641			-0.802	-0.848	0.568	0.142	-0.525	-1.01
1.22	-0.0984	-0.423	1.54	0.44	-0.0917	0.435	-0.157			-0.651	-1.21	0.652	0.0659	0.103	-0.766
1.21	0.238	-1.47	1.19	0.386	-0.0401	0.042	-0.877			-0.654	-0.489	0.503	-0.022	0.258	-0.546
1.14	0.0498	-0.52	1.63	-0.395	-0.0467	0.398	-0.528			-0.671	-0.0229	0.486	-0.0387	0.153	-1.04
1.07	1.17	-1.19	1.67	-0.621	0.257	0.485	-0.38			-0.654	-0.143	0.659	-0.0859	0.00927	-0.928
0.63	1.9	-1.05	1.62	-0.193	0.136	0.267	-1			-0.596	0.14	0.482	-0.0953	0.212	-0.611
0.954	1.69	-1.16	1.06	0.129	-0.0574	0.583	-0.645			-0.809	-0.137	0.517	0.00982	-0.225	-0.957
0.97	1.14	-1.18	0.479	-0.21	0.175	0.159	-0.785			-0.792	-0.221	0.677	0.395	-0.081	-0.898
1.09	0.681	-0.196	1.24	-0.573	0.113	-0.475	-0.2			-0.759	-0.304	0.468	0.666	0.401	-0.838
0.942	1.01	-1.61	0.896	-0.468	-0.0637	0.305	-0.547			-0.896	-0.958	0.708	0.527	0.176	-0.675
0.874	1.49	-0.198	0.169	-0.25	-0.107	1.13	-0.848			-0.698	-0.746	0.669	0.425	0.118	-1.26
1.31	1.32	-0.638	-0.0212	-0.464	-0.172	0.974	-0.57			-0.754	-0.157	0.872	0.391	-0.0116	-0.505
0.783	0.751	-1.88	0.218	-0.893	-0.259	0.564	-0.268			-0.782	-0.582	1.38	0.295	-0.463	-0.787
0.827	0.84	-0.397	0.207	-0.908	-0.0671	0.482	-0.217			-0.71	-0.606	1.25	0.348	0.0166	-0.836
0.385	0.11	-0.0264	-0.169	-0.61	0.781	0.327	-0.44			-0.716	-0.00441	1.23	0.279	0.185	-0.949
0.698	0.595	-1.37	0.466	-0.337	0.575	0.133	-0.068			-0.59	-0.888	1.26	0.253	-0.00532	-0.919
0.931	1.07	-0.913	0.0503	-0.145	-0.526	0.132	-0.0595			-0.684	-0.637	1.27	0.207	-0.219	-0.863
0.641	0.788	-1.01	0.0108	-0.0394	-0.88	0.27	-0.268			-0.468	-0.0856	1.41	0.2	0.276	-1.02
0.381	0.81	-0.941	0.00558	-0.45	-0.75	0.523	-0.256			-0.36	0.17	1.16	0.169	0.138	-1.33
0.71	0.43	-0.725	0.137	-0.83	-0.435	0.533	-0.789			-0.429	-0.265	1.05	0.208	-0.256	-0.882
1.12	0.0152	-1.62	-0.0215	-0.299	-0.292	0.908	-0.176			-0.401	-0.0496	1.09	0.192	-0.177	-1.01
0.54	-0.277	-0.567	-0.294	0.143	-0.912	1.25	-0.0416			-0.537	-0.227	1.02	0.135	-0.622	-1.44
0.372	0.123	-0.716	0.201	-0.022	-0.833	0.812	-0.538			-0.502	-0.24	1.1	0.164	-0.337	-0.976
0.307	0.172	-1.65	-0.171	-0.761	0.0567	0.653	0.0219			-0.513	-0.658	0.969	0.161	-0.601	-0.817
0.304	0.08	-1.14	-0.35	-1.3	0.456	0.985	0.104			-0.666	-0.421	1.29	0.111	-0.281	-1.17
0.45	-0.0519	-1.65	-0.211	-1.27	0.131	1.02	-0.506			-0.51	-0.548	1.61	0.0654	-0.547	-2.35
0.842	0.08	-1.49	-0.154	-1.06	-0.694	0.548	-0.35			-0.516	-0.527	1.4	0.0448	-0.0855	-1.86
0.956	-0.0293	-0.808	-0.261	-0.931	-0.987	0.294	-0.441			-0.535	-0.207	1.44	0.0407	-0.6	-1.75
0.943	0.129	-1.45	-0.143	-0.56	-0.392	0.545	0.545			-0.399	-0.84	1.46	0.0796	-0.481	-1.33
0.318	-0.474	-0.569	-0.39	-0.669	0.00473	0.61	0.822			-0.457	-0.245	1.74	-0.00436	-0.325	-1.18
0.512	0.299	-1.66	-0.278	-0.88	-0.0467	0.303	1.44			-0.616	-0.704	1.48	0.0778	-0.655	-1.81
0.837	0.0114	-1.87	-0.583	-0.812	-0.565	0.168	1.92			-0.618	-0.646	1.47	0.112	-0.47	-1.95
0.307	-0.564	-0.813	-0.789	-0.588	-1	0.461	2.32			-0.59	-0.88	1.46	0.131	-0.71	-1.46
0.343	-0.488	-2.14	-0.551	-0.961	-0.789	0.82	1.76			-0.636	-0.781	1.65	0.0715	-0.247	-1.74
0.52	-0.721	-1.19	-0.287	-1.78	-0.875	0.886	1.95			-0.821	-0.708	1.52	0.00248	-0.38	-1.55
0.901	-0.804	-1.11	-0.215	-1.38	-1.01	0.253	1.94			-0.851	-1.24	1.83	-0.0109	-0.343	-1.58
0.916	0.542	-1.25	-0.297	-0.301	-0.806	-0.38	1.48			-0.873	-1.15	1.58	-0.0109	-0.611	-0.877
0.739	0.811	-0.816	-0.436	-0.498	-0.588	0.169	1.24			-0.687	-0.832	1.95	0.0716	-0.477	-0.26
0.992	1.21	-1.84	-0.143	-1.09	-0.305	0.884	0.862			-0.683	-0.403	1.78	0.375	0.0553	-0.923
0.609	0.494	-1.5	-0.288	-0.827	-0.278	0.527	1.17			-0.724	-0.734	1.99	0.33	-0.484	-1.45
1.51	0.578	-0.845	0.0302	-0.692	-0.222	0.138	0.881			-0.814	-0.877	2.28	0.298	-0.379	-1.53
1.11	0.00303	-1.55	-0.135	-0.897	0.108	0.385	1.32			-0.835	-0.525	1.93	0.129	-0.123	-0.796
0.802	0.539	-0.781	0.103	-0.974	0.224	0.682	1.29			-0.819	-0.0492	1.69	0.139	-0.158	-1.25
1.21	0.522	-0.32	0.231	-1.19	0.16	0.37	0.812			-0.774	0.386	1.75	0.123	-0.203	-0.962
0.935	0.643	-1.77	-0.087	-1.43	0.33	0.357	0.786			-0.736	0.82	1.88	0.183	-0.374	-0.743
1.2	0.607	-0.596	0.4	-1.01	1.06	0.866	0.698			-0.532	0.0645	1.96	0.404	-0.252	-0.856
0.902	-0.381	-0.964	0.0375	-0.616	0.843	0.378	1.03			-0.394	0.671	2.06	0.398	-0.26	-0.892
1.21	-0.312	-0.522	-0.468	-0.944	0.142	0.446	1.12			-0.537	-0.904	1.88	0.29	-0.192	-1.07
0.893	1.04	-0.562	-0.362	-1.4	-0.288	0.704	0.75			-0.591	-0.48	1.71	0.299	0.0232	-0.738
1.21	1.34	-0.466	-0.384	-0.817	-0.47	0.225	0.709			-0.664	-0.267	1.65	0.186	-0.724	-0.68
1.41	1.34	0.0635	-0.293	-0.387	-0.274	0.403	0.57			-0.706	0.0391	1.63	0.2	-0.223	-1.12
0.606	1.28	-1.71	-0.57	-0.742	-0.187	0.985	1.06			-0.68	-0.288	1.51	0.352	-0.425	-0.885
0.698	1.53	-0.938	-0.295	-1.28	-0.215	1.03	0.72			-0.732	-0.0341	1.63	0.308	-0.156	-1.25
1.15	1.66	-0.844	-0.0214	-1.4	-0.09	0.777	-0.0904			-0.588	0.257	1.43	0.207	-0.344	-0.872
0.957	1.87	-1.13	-0.221	-1.36	0.101	0.367	0.38			-0.67	0.127	1.24	0.197	-1.11	-0.871
1.25	3.23	-0.939	0.382	-1.66	-0.0253	0.356	0.254			-0.76	-0.0135	1.61	0.222	-0.675	-0.844
1.19	2.9	0.292	0.207	-1.22	-0.109	0.713	0.316			-0.823	0.387	1.54	0.322	-0.473	-1.06
0.881	2.7	-0.935	-0.399	-0.787	0.197	0.737	0.236			-0.793	0.528	1.63	0.126	-0.00638	-1.09
1.18	2.78	0.224	0.491	-1.51	0.0204	0.862	0.583			-0.84	1.11	1.42	0.0891	-0.828	-0.759
0.625	2.03	0.989	-0.514	-1.37	0.285	0.893	0.756			-0.825	0.627	1.32	0.02	-0.761	-0.0838
1.27	1.56	1.08	0.394	-0.621	1.03	0.653	0.288			-0.622	-0.00815	1.39	0.0341	-0.961	0.413
1.01	1.51	0.821	0.106	-1.28	0.201	0.748	0.255			-0.707	0.329	1.53	-0.00169	-0.41	0.416
1.15	1.91	2.01	0.681	-2.01	-0.608	1.02	0.629			-0.807	-0.0173	1.68	0.0577	-0.465	0.137
1.16	1.98	1.34	0.187	-2.12	-0.129	1.13	1			-0.659	0.58	1.79	0.111	-0.304	-0.268
0.965	1.81	0.636	0.29	-1.52	0.18	1.03	0.861			-0.73	-0.286	2.02	0.27	-0.144	-0.832
1.03	1.2	0.856	-0.182	-1.01	0.131	0.331	0.533			-0.805	-0.0483	2.06	0.3	-0.501	-0.479
0.873	0.943	1.6	-0.171	-1.2	0.00275	-0.371	0.657			-0.551	-0.0381	1.99	0.29	-0.606	-0.292
0.407	1.29	0.744	-0.43	-1.55	-0.183	0.151	0.599			-0.519	-0.296	2.08	0.331	-0.642	-0.596
0.826	1.38	0.687	-0.381	-1.41	-0.303	1.01	0.381			-0.673	-0.322	2.33	0.283	-0.317	-0.711
1.03	1.52	0.813	-0.633	-0.869	-0.516	0.672	0.21			-0.62	0.00245	1.95	0.204	-0.733	-0.505
0.826	0.917	1.75	0.0844	-1.17	-0.362	0.0956	-0.00985			-0.763	-0.387	2.28	0.168	-0.0866	-0.639
1.18	0.771	0.138	-0.379	-1.5	0.351	0.512	-0.342			-0.729	0.0739	1.89	0.507	-0.325	-0.509
1.1	0.81	0.359	-0.773	-1.01	0.351	0.591	0.335			-0.558	-0.797	2.19	0.798	0.15	-0.921
1.28	0.552	0.527	-1.11	-1.12	-0.00051	-0.112	-0.199			-0.655	-0.553	2.26	0.772	-0.169	-0.657
0.57	1.09	0.0539	-0.505	-1.77	0.059	0.0541	0.373			-0.712	-0.511	2.33	0.648	-0.725	-0.595
0.731	0.957	-0.754	-0.445	-1.8	-0.291	0.361	0.483			-0.696	0.158	2.09	0.652	-0.237	-0.636
0.894	1.35	-1.08	-0.668	-1.25	-0.717	-0.0913	0.387			-0.76	-0.722	2.02	0.638	-0.208	-0.562
0.817	2.21	0.637	-0.206	-1.01	-0.394	-0.158	0.0693			-0.675	-0.837	2.15	0.668	-0.187	-0.671
0.425	1.9	0.471	-0.00759	-1.49	-0.258	0.304	0.0652			-0.801	-0.294	2.06	0.66	-0.515	-1.43
0.879	1.61	0.303	0.695	-1.85	-0.0103	0.551	0.0116			-0.699	0.491	2.06	0.826	-1.08	-0.945
0.726	1.22	-0.57	0.367	-1.55	0.4	0.338	0.216			-0.547	-0.175	1.85	0.751	-0.712	-1.16
1.14	1.28	0.0815	0.337	-1.14	0.189	0.242	0.124			-0.698	-0.437	1.81	0.785	-0.684	-0.618
0.89	1.41	-0.947	0.855	-1.23	-0.0626	0.228	0.319			-0.652	-0.286	1.89	0.866	-1.02	-0.75
0.913	1.45	0.878	0.688	-1.46	-0.287	0.103	0.00123			-0.78	-0.344	1.74	1.16	-0.631	-0.691
0.754	1.41	0.231	0.942	-0.77	-0.908	0.212	0.223			-0.792	-0.256	1.95	1.19	-0.988	-1.35
1.26	0.165	0.732	0.592	-0.787	-0.838	0.231	0.16			-0.893	-0.707	1.82	1.09	-1.19	-1.63
1.25	0.276	0.724	0.283	-1.77	-0.301	0.52	1.08			-0.759	-0.434	1.76	1.09	-0.341	-1.15
1.09	0.57	0.341	0.779	-1.89	-0.279	0.387	1.12			-0.542	-1.2	1.56	0.885	-1.28	-0.948
0.672	0.368	-0.144	0.401	-1.24	-0.308	0.142	1.08			-0.639	-1.26	1.73	0.844	-0.911	-0.402
1.08	0.496	0.366	0.579	-0.999	-0.296	0.455	0.598			-0.651	-0.968	1.7	0.783	-0.951	-0.587
1.15	0.849	0.37	0.437	-1.11	-0.343	0.673	1.1			-0.584	0.263	1.63	0.68	-0.509	-0.168
1.4	0.753	-0.217	0.851	-1.32	-0.143	0.406	1.19			-0.63	-0.777	1.56	0.733	-0.704	-0.184
1.45	1.33	0.248	0.566	-1.3	-0.22	0.392	0.642			-0.52	-0.275	1.77	0.588	-1.07	-0.0304
0.908	0.744	-0.471	0.775	-1.12	-0.997	0.877	0.669			-0.406	-0.427	1.7	0.577	-0.785	-0.18
0.792	0.178	0.281	0.825	-1.17	-1.17	0.214	0.76			-0.295	-0.387	1.68	0.484	-0.634	0.277
1.07	0.504	-0.212	0.593	-1.09	-0.198	-0.525	0.612			-0.375	-0.322	1.9	0.424	-0.996	-0.265
1.31	1.28	0.748	0.686	-0.907	0.187	0.0518	0.591			-0.338	-0.333	1.75	0.403	-0.571	0.309
1.06	1.2	0.853	0.399	-0.587	-0.304	0.907	0.383			-0.545	-0.383	1.84	0.434	-0.803	0.225
0.785	0.678	0.703	0.29	-0.914	-0.728	0.994	0.625			-0.496	-0.323	1.96	0.418	-0.611	-0.085
1.05	0.586	0.45	0.553	-1.51	-0.422	0.142	0.234			-0.447	-0.396	2	0.372	-0.655	0.0755
0.947	0.402	0.696	0.94	-1.71	-0.465	-0.134	0.139			-0.488	-0.339	2.02	0.43	-0.545	-0.447
0.863	0.467	-0.146	0.434	-1.6	-0.678	0.432	0.479			-0.311	-0.85	1.82	0.302	-1.22	-0.186
1.04	0.544	-0.411	-0.00188	-1.23	-0.324	0.54	0.497			-0.22	-0.869	1.93	0.319	-0.957	-1.04
0.724	0.588	-0.0868	0.246	-0.871	-0.744	0.134	0.577			-0.231	-0.325	2.16	0.41	-0.999	-0.578
0.926	0.791	-0.0748	0.22	-0.524	-1.13	0.34	-0.0722			-0.308	-0.819	1.73	0.393	-0.771	-0.422
1.11	0.36	0.184	0.536	-0.639	-0.663	0.851	0.000532			-0.267	-0.941	1.75	0.342	-0.548	-0.778
1.2	0.539	0.146	0.18	-1.22	-0.268	0.805	0.254			-0.322	-0.223	1.81	0.338	-0.867	-0.898
0.639	0.939	1.15	0.51	-1.68	-0.35	0.456	-0.063			-0.307	-0.351	2.1	0.29	-0.852	-0.865
1.05	0.819	0.0962	0.254	-1.66	-0.693	0.266	0.291			-0.405	-0.15	1.9	0.184	-1.06	-0.968
1.22	0.982	-0.33	0.0264	-1.15	-0.73	0.259	0.393			-0.505	-0.826	2.27	0.173	-0.671	-1.19
0.894	0.406	0.284	0.00319	-0.93	-0.339	0.63	0.587			-0.261	-0.641	2.07	0.119	-1.04	-1.09
1.01	0.435	0.233	0.825	-1.6	0.0229	0.363	0.786			-0.328	-0.455	2.04	0.135	-0.953	-0.969
1.09	0.416	-0.326	0.572	-1.83	-0.122	-0.53	0.593			-0.269	-0.993	2.31	0.0521	-1.08	-0.795
1.16	0.029	0.267	0.422	-1.09	-0.277	-0.725	0.725			-0.342	-0.589	2.36	-0.13	-0.932	-0.853
1.03	0.448	-0.652	0.022	-0.768	0.526	-0.0617	0.917			-0.322	-1.27	2.37	-0.237	-1.23	-0.632
1.19	0.128	-0.253	0.464	-1.19	0.765	-0.0203	0.619			-0.166	-0.928	2.05	-0.325	-1.12	-0.528
1.19	-0.13	0.0845	0.341	-1.68	0.0168	-0.501	0.234			-0.0823	-0.775	2.36	-0.486	-1.43	-0.32
1.07	-0.0587	0.0699	0.0604	-1.49	-0.366	-0.0946	0.231			-0.0705	-0.815	2.31	-0.383	-0.882	0.0265
0.843	0.22	0.398	-0.288	-0.856	0.568	0.156	1.35			-0.00187	-1.14	2.15	-0.4	-1.28	-0.445
0.993	1.24	0.484	0.273	-0.77	1.47	-0.306	0.701			0.0116	-0.946	2.48	-0.512	-1.09	-0.163
1.47	0.433	0.853	0.408	-1.37	1.28	-0.311	0.234			0.164	-1.33	2.41	-0.549	-0.922	-0.341
1.21	0.782	0.279	0.798	-1.56	0.55	-0.434	0.456			0.291	-0.456	2.27	-0.73	-0.888	-0.132
1.3	0.626	0.103	0.197	-1.19	0.46	-1.3	0.869			0.397	-1.13	2.28	-0.582	-0.609	-0.272
1.09	0.508	-0.602	0.544	-0.722	0.493	-1.16	0.558			0.302	-1	2.53	-0.614	-0.82	0.0942
0.539	0.0528	0.0245	0.396	-1.11	-0.0267	-0.112	0.909			0.215	-0.228	2.39	-0.512	-0.954	0.0675
1.1	-0.0507	0.784	0.463	-1.6	0.193	-0.224	1.01			0.304	0.015	2.48	-0.311	-1.35	-0.386
0.704	-0.364	0.1	0.914	-1.05	0.733	-1.1	1.06			0.391	-0.238	2.25	0.0111	-0.857	-0.00673
0.672	0.0493	0.37	0.435	-0.58	0.59	-1.28	0.927			0.123	-0.533	1.91	-0.0329	-0.376	-0.0863
0.865	0.428	0.963	0.385	-1.1	0.7	-1	0.444			0.263	-0.657	2.15	-0.191	-0.957	0.184
1.07	0.71	0.428	0.391	-1.61	0.981	-0.674	0.393			0.175	-0.885	2.43	-0.143	-1.45	0.431
1.21	1.03	-0.391	0.524	-0.957	1.13	-0.66	0.715			0.166	-0.338	2.15	-0.344	-0.973	0.157
0.938	1.32	-0.201	0.839	-0.573	1.56	-0.717	0.811			0.0511	-0.657	2.55	-0.348	-1.03	0.0904
1.14	1.17	1.23	0.316	-1.15	1.46	-0.463	0.792			0.0523	-0.677	2.5	-0.463	-1.53	0.399
1.09	1.11	0.471	0.294	-1.21	0.887	-0.843	0.356			0.0617	-0.648	2.61	-0.442	-1.17	0.129
1.27	0.959	0.358	0.455	-1.26	0.473	-1.17	0.63			0.275	-0.725	2.56	-0.555	-0.945	0.0596
1.43	1.14	0.314	0.819	-1.61	1.36	-0.808	0.496			0.229	-0.833	3.16	-0.573	-1.23	0.315
1.64	0.892	0.326	0.526	-1.36	2.19	-0.758	0.393			0.523	-1.14	2.67	-0.771	-1.61	-0.532
2.8	0.713	1.68	0.742	-1.02	2.09	-0.815	-0.143			0.523	-0.796	2.5	-1.03	-1.19	-0.618
2.27	0.456	0.539	0.694	-1.23	1.87	-0.381	0.498			0.919	-1.22	2.7	-1.01	-0.938	-0.112
2.45	0.746	1.2	0.529	-1.11	1	0.00177	0.57			0.98	-1.11	2.64	-0.952	-1.39	-0.216
2.3	0.149	0.123	0.254	-1.07	0.0697	-0.29	0.515			0.986	-1.18	2.62	-1.13	-1.02	-0.227
2.34	0.208	0.688	0.889	-1.29	0.745	-0.853	0.719			0.819	-0.881	2.19	-0.881	-0.837	-0.504
1.93	0.398	0.369	0.351	-1.08	1.66	-0.804	0.712			0.701	-0.998	2.17	-0.603	-0.998	-0.275
1.88	0.798	0.669	0.38	-1.01	1.76	-0.404	-0.0166			0.643	-0.673	2.24	-0.618	-0.915	-0.541
2.06	0.652	0.387	0.515	-1.27	1.6	-0.439	0.31			0.529	-1.46	2.49	-0.527	-0.986	-0.708
2.16	0.384	0.808	0.427	-1.16	1.21	-0.554	0.49			0.422	-1.24	2.34	-0.712	-0.886	-0.66
2.07	-0.192	0.765	0.35	-0.808	0.321	-0.303	0.0773			0.342	-1.4	2.54	-0.733	-1.11	-1.05
2.22	0.0424	1.1	0.51	-1	0.0931	-0.163	0.355			0.217	0.136	2.25	-0.966	-0.877	-1.06
1.73	-0.245	-0.172	0.173	-1.13	0.761	-0.288	-0.104			0.141	0.734	2.1	-0.865	-1.13	-0.776
1.94	0.691	0.0238	0.502	-1.03	1.13	-0.305	0.317			0.0692	0.862	2.16	-0.619	-0.724	-0.73
2.17	-0.156	0.533	0.314	-1.54	0.987	-0.147	-0.404			0.113	1.09	2.13	-0.739	-0.882	-0.947
2.09	0.13	0.063	0.67	-1.81	0.889	-0.0983	0.0241			0.0528	0.983	2.19	-0.806	-1.2	-0.918
2.15	0.392	-0.612	0.334	-1.24	0.51	-0.236	0.0616			-0.0143	0.422	2.11	-0.928	-0.928	-1.28
2.53	-0.0651	0.802	0.183	-0.584	0.265	-0.497	-0.57			0.0815	0.765	2.5	-0.985	-1.48	-1.05
2.01	0.381	0.0696	0.514	-0.672	0.332	-0.307	-0.401			0.00476	0.629	2.15	-0.948	-0.768	-1.63
2	0.536	0.303	0.282	-0.988	0.576	-0.363	-0.52			0.0124	0.453	1.84	-1.2	-1.04	-1.64
2.32	0.281	0.944	0.549	-1.24	0.588	-1.15	-0.447			-0.144	0.48	2.24	-1.18	-1.4	-0.893
1.65	0.0713	1.41	0.484	-1.63	0.54	-1.33	-0.541			-0.263	0.404	2.49	-0.856	-1.45	-0.845
2.04	-0.344	-0.605	0.539	-1.14	0.985	-1.08	-0.675			-0.188	0.661	2.42	-0.682	-1.07	-0.912
2.28	-0.41	0.00102	0.5	-0.859	0.928	-1.38	-0.293			-0.191	0.134	2.07	-0.699	-0.903	-1.01
2.01	-0.253	0.516	0.537	-1.09	0.546	-1.6	-0.29			-0.215	-0.143	2.34	-0.67	-1.27	-1.09
2.09	-0.106	1.21	0.571	-1.26	0.998	-1.37	-0.496			-0.227	0.444	2.28	-0.865	-1.31	-1.32
2.15	-0.586	-0.0935	0.867	-1.34	0.63	-0.844	-0.719			-0.181	0.288	2.22	-0.815	-0.812	-1.26
1.9	-0.564	0.0535	0.576	-1.57	-0.0368	-0.607	-0.448			-0.148	-0.1	2.54	-0.853	-1.29	-0.698
2.1	-0.563	-1.31	0.726	-1.65	0.145	-0.351	-1.15			-0.000468	0.142	2.04	-0.732	-0.861	-0.882
1.68	-0.03	-0.895	1.26	-1.36	0.645	0.469	-0.529			0.0643	-0.00356	2.53	-0.733	-1.58	-1.01
1.9	-0.379	-0.541	1.07	-1.28	0.816	0.474	-0.698			-0.0754	0.302	2.26	-0.656	-1.25	-0.929
2.21	-0.85	0.221	0.529	-1.36	0.591	-0.52	-0.476			-0.0325	0.337	2.76	-0.589	-1.61	-0.492
1.73	-1.01	0.585	0.611	-1.58	0.862	-1.26	0.041			-0.0784	0.119	2.49	-0.499	-1.43	-0.511
1.88	-0.0461	0.0966	0.906	-2.11	1.44	-0.769	0.772			-0.136	-0.765	2.73	-0.355	-1.06	-0.369
1.41	-0.115	0.777	0.771	-1.94	1.49	-0.241	0.678			0.0458	-0.81	2.66	-0.22	-1.27	0.128
2.11	-0.0793	-0.346	0.932	-1.05	0.998	-0.23	0.647			0.2	0.0963	2.91	-0.165	-1.31	-0.64
1.43	0.26	0.553	0.948	-0.624	1.29	-0.322	1			0.19	-0.519	2.82	-0.167	-1.14	-0.289
2.28	0.357	0.869	1.11	-0.974	0.999	-0.267	0.796			0.358	0.216	3.04	-0.148	-0.87	-1.04
1.84	0.00214	0.252	0.85	-1.54	0.35	-0.361	0.561			0.169	0.0389	2.67	-0.203	-1.44	-0.441
2.11	-0.456	-0.228	0.622	-1.49	0.386	-0.411	0.693			0.127	0.229	2.91	-0.137	-1.12	-1.28
1.74	-0.259	-0.069	0.728	-0.829	0.876	-0.134	0.485			0.198	0.062	2.88	-0.172	-1.05	-0.699
1.39	-0.804	-0.346	0.431	-0.898	1.2	-0.313	0.322			-0.0374	0.446	2.66	-0.174	-0.899	-1.34
1.87	-0.823	1.64	0.485	-1.84	0.995	-0.639	0.101			-0.0779	-0.434	2.56	-0.145	-1.64	-0.791
1.37	-0.206	0.172	0.187	-2.06	0.0529	-0.295	-0.0979			-0.00741	0.33	2.64	-0.268	-0.921	-1.11
1.88	0.17	0.603	1.02	-1.65	-0.494	-0.03	0.0208			-0.0109	-0.638	2.89	-0.282	-1.25	-1.64
1.58	0.684	1.08	0.427	-1.39	0.333	-0.134	0.163			-0.0763	-0.888	2.78	-0.258	-0.799	-1.51
1.87	1.42	0.421	0.112	-1.45	1.12	-0.24	0.175			0.119	-0.331	2.58	-0.0231	-1.24	-0.878
1.85	0.58	-0.0413	0.278	-1.53	0.923	-0.457	-0.0616			-0.205	-0.876	2.86	0.0629	-1.13	-1.3
1.67	0.325	1.82	0.413	-1.25	0.651	-0.817	-0.415			-0.0932	-0.471	2.59	0.0872	-1.48	-1.59
1.69	0.468	1.07	0.128	-0.697	0.78	-0.609	-0.801			-0.0615	-0.763	2.23	-0.0358	-1.21	-1.75
1.73	-0.319	0.735	0.285	-1.3	1.42	0.057	-0.305			-0.0346	-0.462	2.45	0.00931	-1.41	-1.48
1.94	0.283	0.413	0.421	-2.3	1.53	0.65	-0.682			0.117	-0.896	2.56	-0.107	-0.612	-1.36
1.58	-0.66	0.602	0.213	-1.77	0.547	0.635	-0.736			0.0701	-0.365	2.27	-0.348	-1.04	-0.697
1.6	-0.632	1.12	-0.181	-0.904	-0.0481	-0.105	-0.662			0.16	-0.517	2.32	-0.144	-0.886	-1.13
1.36	-1.03	0.548	0.654	-0.974	0.0886	-0.725	-0.823			0.047	-0.659	2.71	-0.255	-0.859	-1.26
1.43	-1.52	-0.49	0.931	-1.28	0.282	-0.738	-0.283			-0.132	-1.04	2.29	-0.191	-0.997	-1.35
1.55	-1.46	-0.0114	1.09	-1.35	-0.0328	-0.911	-0.675			-0.0844	-1.12	2.58	-0.189	-0.783	-1.29
1.38	-1.65	0.253	0.582	-1.62	-0.0901	-1.03	-0.794			-0.151	-1.13	2.33	-0.137	-1.16	-1.14
1.86	-1.69	-0.329	0.769	-2.23	0.159	-0.784	-0.746			-0.38	-1.12	2.66	-0.146	-1.18	-1.27
1.73	-1.69	-0.268	0.84	-1.78	0.54	-0.669	-0.54			-0.281	-1.44	2.37	-0.162	-1.3	-0.655
1.41	-1.81	-0.76	0.488	-0.971	0.123	-0.742	-0.363			-0.205	-1.14	2.63	-0.00412	-1.03	-1.62
1.39	-1.65	0.778	0.707	-1.01	-0.29	-0.905	-0.455			-0.269	-0.952	2.27	-0.0619	-0.806	-0.865
1.68	-1.08	-0.611	0.827	-1.47	0.226	-0.814	-0.524			-0.362	-1.59	2.29	-0.105	-0.891	-0.676
1.91	-1.24	-0.417	1.13	-1.67	-0.193	-0.465	-0.853			-0.352	-1.38	2.23	-0.162	-0.494	-0.0573
1.9	-2.02	0.462	0.693	-1.07	-0.852	-0.506	-0.897			-0.362	-1.33	2.23	-0.178	-0.367	-0.861
1.56	-1.17	0.0793	0.988	-0.822	-0.126	-0.534	-0.332			-0.218	-1.18	2.57	-0.256	-0.755	-1.06
1.61	-0.8	-0.256	0.927	-1.63	0.62	-0.233	-0.905			-0.324	-1.1	2.4	-0.289	-0.963	-1.02
1.59	-1.67	-0.593	1.34	-1.92	0.509	-0.511	-0.827			-0.204	-1.39	2.38	-0.333	-0.495	-1.43
1.6	-1.64	0.388	0.493	-1.23	0.259	-0.506	-1.54			-0.351	-0.813	2.91	-0.255	-0.436	-1.54
1.91	-1.35	-0.598	0.585	-1.18	0.402	-0.214	-1.16			-0.45	-1.16	2.75	-0.168	-0.574	-1.56
1.6	-0.704	-0.365	0.379	-2.14	0.43	-0.624	-0.731			-0.198	-0.815	2.78	-0.212	-1.2	-1.05
1.9	-0.778	-0.933	-0.0534	-2.68	0.469	-1.34	-0.692			-0.241	-0.773	2.63	-0.222	-1.29	-1.11
2.2	-0.728	-0.526	-0.0737	-2.18	0.621	-1.71	-1.11			-0.414	-0.36	2.52	-0.303	-1.19	-1.08
1.91	-0.338	-0.669	0.0744	-1.42	0.361	-0.805	-0.874			-0.406	-0.242	2.75	-0.357	-1.36	-0.708
1.54	-0.24	-0.667	-0.0888	-1.16	0.0581	-0.172	-0.382			-0.412	-0.37	2.73	-0.448	-0.725	-0.795
2.02	-0.488	-1.76	-0.0464	-1.05	0.217	-0.753	-0.575			-0.41	-0.335	2.7	-0.373	-0.886	-0.43
1.24	-0.597	-1.01	0.0481	-0.9	0.41	-0.72	-0.286			-0.455	-0.404	2.87	-0.247	-1.43	-0.252
1.3	0.136	-1.06	-0.0454	-1.29	-0.0235	-0.0431	-0.26			-0.495	-1.28	2.63	-0.352	-0.88	-0.306
1.33	-0.328	-0.781	-0.011	-1.79	-0.266	0.122	-0.201			-0.466	-0.113	2.99	-0.218	-0.817	0.0361
1.71	-0.273	-0.942	0.368	-1.54	-0.31	0.103	-0.264			-0.619	-0.34	2.64	-0.219	-1.08	-0.268
1.27	-0.879	-1.09	0.744	-0.823	0.0424	0.323	-0.0404			-0.654	-0.692	2.92	-0.334	-0.892	-0.326
1.42	-0.803	-1.19	-0.0351	-0.508	0.429	0.347	0.2			-0.435	-0.305	3.17	-0.299	-1.29	-0.432
1.8	-0.361	-1.11	0.266	-1.33	0.704	-0.197	0.987			-0.627	-0.772	3.28	-0.365	-1.53	-0.449
1.52	0.968	-0.666	0.594	-2	0.69	-0.515	0.927			-0.534	-0.426	3.51	-0.328	-1.17	-0.636
1.52	0.878	-2.3	0.165	-1.45	0.154	-0.0444	0.184			-0.503	-0.667	3.54	-0.132	-1.27	-0.439
1.17	0.521	-1.23	0.193	-0.335	0.113	0.18	-0.301			-0.594	-1.08	3.22	-0.118	-1.22	-0.298
0.875	0.971	-1.37	0.285	-0.318	0.254	-0.145	0.29			-0.758	-1.38	3.23	-0.0828	-1.16	-0.438
1.62	0.76	-1.59	0.565	-1.18	0.385	-0.214	0.154			-0.749	-1.32	3.14	-0.185	-1.07	-0.13
1.35	0.638	-1.41	0.522	-0.956	0.207	0.0253	0.296			-0.562	-1.7	3.01	-0.0506	-1	0.185
1.51	1.05	-0.91	0.492	-0.715	-0.176	0.312	0.234			-0.728	-1.38	3.11	-0.215	-1.12	-0.334
1.51	0.704	-1.82	0.322	-1.29	0.0674	-0.0865	0.342			-0.584	-1	2.87	-0.268	-1.19	-0.166
1.47	0.0336	-1.94	0.884	-1.38	0.118	-0.0764	-0.659			-0.527	-1.03	2.76	-0.341	-1.27	-0.114
1.31	-0.0864	-0.272	0.95	-1.09	0.116	0.705	-0.583			-0.558	-0.895	2.85	-0.215	-0.78	0.576
1.16	0.52	-1.67	0.285	-1.25	0.564	0.304	0.0171			-0.472	-0.623	2.81	-0.334	-0.698	0.772
1.28	0.511	-2	0.627	-1.27	0.361	-0.791	-0.256			-0.638	-0.717	2.95	-0.334	-1.12	0.751
1.36	0.939	-1.89	0.0425	-0.55	-0.207	-0.74	-0.12			-0.618	-1.53	2.7	-0.383	-0.945	0.473
1.26	0.981	-1.07	0.00288	-0.936	-0.207	-0.239	-0.469			-0.447	-0.745	2.64	-0.429	-0.633	0.502
1.79	0.394	-1.99	-0.391	-2	0.265	0.0834	-0.212			-0.668	-1.63	2.62	-0.599	-0.969	0.863
1.81	0.234	-2.02	-0.336	-1.46	0.564	0.21	-0.0216			-0.581	-1.64	2.54	-0.523	-0.663	0.215
1.83	-0.0625	-0.892	-0.00541	-0.328	1.12	0.00981	-0.0234			-0.646	-1.32	2.59	-0.452	-0.422	0.263
2.03	0.595	-0.506	-0.358	-0.483	1.76	-0.171	0.0532			-0.419	-1.53	2.62	-0.627	-0.659	0.274
1.7	0.137	-2.08	-0.359	-0.941	1.81	0.0523	0.169			-0.541	-1.89	2.39	-0.672	-0.796	0.193
1.54	1.19	-1.55	0.000742	-0.82	1.07	0.211	0.314			-0.475	-1.99	2.15	-0.756	-0.796	0.11
1.8	0.866	-2.01	0.229	-0.777	0.458	0.158	0.353			-0.537	-1.84	1.82	-0.738	-0.879	0.0275
1.55	0.347	-1.9	-0.265	-1.43	0.467	-0.202	0.465			-0.487	-2.08	1.8	-0.568	-1.45	0.542
1.9	0.931	-1.82	0.229	-1.94	1.12	-0.472	-0.286			-0.568	-2.41	1.79	-0.292	-1.21	0.749
1.56	0.937	-1.8	0.0344	-1.38	1.4	0.0022	-0.288			-0.399	-2.44	2.19	-0.322	-1.27	0.512
1.56	0.931	-1.8	0.591	-0.761	1.12	-0.278	-0.244			-0.583	-1.43	1.76	-0.475	-1.27	0.198
1.07	0.484	-2.09	0.0148	-1.03	1.2	-0.499	-0.504			-0.352	-0.911	1.76	-0.44	-1.39	-0.204
1.78	0.804	-1.54	0.606	-1.56	1.57	-0.0776	0.0932			-0.496	-1.33	1.65	-0.544	-1.24	-0.197
2.16	1.24	-2.41	-0.145	-1.34	1.53	0.207	-0.612			-0.814	-2	1.52	-0.53	-1.1	0.0518
2.44	0.887	-1.52	0.198	-0.54	0.863	0.395	-0.0248			-0.84	-1.82	1.35	-0.612	-1.38	-0.239
2.65	1.16	-1.4	0.451	-0.525	1.09	-0.105	-0.346			-0.727	-1.85	1.1	-0.489	-0.769	-0.602
2.32	1.38	-1.99	0.468	-1.16	1.77	-0.246	-0.365			-0.595	-2.13	1.28	-0.407	-0.394	-0.0602
1.86	1.51	-1.91	0.504	-1.01	1.05	0.232	-0.139			-0.62	-1.91	1.23	-0.392	0.134	-0.0349
2.14	1.18	-1.5	0.57	-0.531	0.109	-0.207	-0.227			-0.636	-1.85	1.11	-0.454	0.569	-0.288
1.84	1.14	-0.153	0.664	-0.762	0.332	-0.537	-0.321			-0.561	-1.99	1.11	-0.313	0.0121	-0.474
1.99	0.911	-1.98	-0.178	-1.42	0.912	0.233	-0.0517			-0.534	-2.01	1.24	-0.612	0.0261	-0.498
1.88	1.18	-2.44	-0.282	-1.61	1.12	0.294	0.127			-0.668	-1.85	1.18	-0.693	-0.111	-0.2
1.98	1.4	-1.89	0.572	-1.14	1.81	-0.864	0.00444			-0.643	-1.8	0.883	-0.683	-0.124	-0.377
2.06	1.29	-2.11	0.291	-0.908	3.1	-1.15	-0.0175			-0.463	-0.808	1.21	-0.983	0.533	-0.354
1.84	1.63	-1.38	0.604	-1.72	3.94	-0.329	0.646			-0.36	-1.71	0.942	-0.96	0.0844	0.391
2.28	0.73	-1.45	0.397	-1.75	4.31	0.0723	0.131			-0.552	-1.49	0.851	-1.08	-0.0489	0.582
1.74	1.53	-1.44	0.32	-0.938	4.54	-0.00687	0.103			-0.493	-1.64	0.841	-1.18	0.462	1.02
1.81	0.77	-1.45	0.0395	-1.32	4.29	0.0431	0.426			-0.58	-1.25	1.15	-1.09	0.69	0.415
2.12	0.504	-1.71	0.584	-2.14	3.91	-0.35	0.446			-0.308	-1.41	0.755	-1.29	0.565	0.569
2.28	-0.21	-1.59	0.21	-1.55	3.12	-0.952	0.388			-0.497	-1.27	0.985	-1.38	0.339	0.766
1.86	0.519	-2.39	0.636	-0.709	2.66	-0.744	0.431			-0.414	-2.23	0.675	-1.38	0.338	0.536
1.71	0.527	-1.28	1.03	-1.42	2.96	-0.352	0.538			-0.45	-1.99	0.899	-1.13	0.209	0.592
1.47	0.569	-1.4	1.07	-2.52	3.4	-0.213	0.825			-0.413	-2.09	0.608	-0.884	0.616	0.756
1.57	0.357	-1.27	1.42	-2.06	3	-0.135	0.918			-0.409	-1.36	0.636	-0.794	-0.415	0.834
1.75	1.97	-2.4	1.82	-1.3	2.44	-0.151	0.892			-0.616	-1.17	0.725	-0.824	-0.0255	0.205
1.22	2.17	-1.39	1.96	-1.47	2.66	0.229	0.259			-0.528	-1.86	0.594	-0.626	-0.573	0.404
1.51	1.59	-1.53	1.66	-1.83	2.87	0.198	0.951			-0.487	-1.85	0.68	-0.659	-0.277	0.0592
2.29	2.03	-2.36	1.36	-1.58	2.81	-0.613	0.622			-0.52	-2.04	0.724	-0.663	-0.585	0.684
1.77	1.91	-1.85	0.902	-0.836	2.67	-0.604	0.4			-0.574	-1.87	0.497	-0.556	-0.502	0.903
1.17	1.59	-2.26	1.3	-1.09	1.67	0.157	0.866			-0.435	-1.91	0.561	-0.82	-0.282	0.935
1.84	1.78	-2.63	1.17	-1.97	1.36	-0.0902	1.34			-0.604	-1.83	0.369	-0.797	-0.385	0.507
1.54	1.83	-1.96	1.27	-1.66	1.84	-0.55	0.601			-0.576	-1.92	0.515	-0.653	-0.523	0.815
1.64	1.98	-1.4	1.29	-0.856	1.81	-0.406	0.858			-0.757	-1.49	0.55	-0.728	-0.141	0.378
1.37	2.48	-2.31	1.15	-0.973	1.57	-0.255	0.976			-0.712	-1.63	0.524	-0.862	-0.309	0.357
1.51	0.874	-2.28	0.724	-1.52	1.24	-0.14	0.368			-0.599	-1.61	0.808	-1.06	-0.262	0.164
1.74	0.712	-2.3	0.924	-1.62	1.14	-0.0652	0.828			-0.804	-1.74	0.413	-1.03	-0.159	0.639
1.38	-0.378	-1.89	0.939	-1.69	2.12	-0.252	0.691			-0.741	-2.07	0.665	-0.858	-0.388	0.458
1.77	0.701	-2.45	1.3	-1.74	2.21	-0.413	0.611			-0.723	-1.48	0.429	-1.08	-0.46	0.801
1.22	0.551	-1.8	0.808	-1.68	1.15	-0.746	1.22			-0.52	-2.09	0.439	-0.898	-0.556	-0.128
1.96	-0.205	-1.97	0.985	-0.989	0.869	-0.431	1.15			-0.741	-1.73	0.491	-0.748	-0.741	0.544
2.02	-0.0581	-1.89	0.878	-0.96	0.885	0.388	1.38			-0.574	-1.58	0.605	-1.12	-0.0106	0.637
1.53	-0.617	-2.1	1.07	-1.28	0.497	0.124	1.02			-0.723	-1.58	0.539	-1	-0.354	1.31
1.21	-0.828	-0.937	1.15	-1.35	0.169	-0.77	1.34			-0.822	-1.48	0.513	-0.872	-0.524	0.781
1.21	-0.58	-1.59	0.972	-1.21	0.988	-0.853	1.74			-0.8	-2.05	0.437	-1.17	0.0142	0.864
1.14	-0.426	-0.999	1.25	-1	1.65	-0.34	1.86			-0.709	-1.73	0.254	-1.08	-0.264	1.24
1.36	-0.724	-2.27	0.993	-1.16	1.15	0.178	1.36			-0.839	-0.829	0.374	-1.05	-0.0997	1.98
1.4	-0.771	-2.19	0.672	-1.71	1.02	0.412	1.51			-0.789	-1.14	0.355	-1.1	-0.265	2.09
1.07	-0.777	-1.46	0.77	-2.13	1.75	0.177	1.14			-0.734	-0.955	0.388	-1.18	-0.0416	1.6
0.933	-0.562	-2.35	0.755	-1.93	2.06	-0.179	1.47			-0.765	-1.16	0.41	-0.944	-0.136	1.73
1.14	0.0555	-2.21	0.373	-1.74	1.83	-0.802	1.81			-0.704	-1.56	0.458	-0.891	-0.478	2.33
0.843	2.06	-2.6	0.782	-1.61	1.64	-0.423	1.55			-0.645	-0.994	0.583	-1.1	-0.349	1.59
0.679	1.66	-2.58	0.638	-1.41	1.71	0.242	1.43			-0.791	-1.19	-0.0669	-1.02	-0.263	1.68
0.909	2.94	-0.858	0.875	-1.2	1.68	0.0604	1.52			-0.855	-1.13	0.453	-0.861	0.045	1.26
0.729	1.95	-2.25	1.15	-1.47	1.25	-0.32	1.86			-0.78	-1.61	0.113	-0.708	-0.298	1.18
0.458	2.23	-2.19	1.07	-1.71	0.835	-0.606	1.6			-0.874	-1.07	0.386	-0.786	-0.331	0.643
1.22	2.02	-1.8	1.13	-1.23	0.795	-0.787	1.53			-0.85	-1.7	0.195	-0.426	0.286	0.466
1.35	1.58	-1.02	1.37	-0.857	0.858	-0.571	1.41			-0.993	-1.83	-0.00498	-0.303	0.00863	0.901
1.29	2.69	-2.44	1.56	-1.1	0.791	-0.168	1.47			-0.794	-1.8	0.0577	-0.686	-0.032	0.79
1.24	3.32	-2.28	1.64	-0.933	0.763	-0.625	1.61			-0.68	-2.04	0.258	-0.756	-0.166	0.973
1.24	2.8	-1.84	1.2	-0.549	0.889	-0.698	1.65			-0.899	-1.77	0.132	-0.589	0.0157	0.219
1.34	2.87	-1.67	1.6	-0.784	0.343	0.104	1.53			-0.832	-1.59	0.244	-0.511	0.188	0.404
0.667	1.9	-2.15	1.53	-1.12	-0.307	0.544	1.67			-0.764	-1.4	0.0676	-0.803	0.274	0.457
1.13	2.06	-1.36	1.5	-0.935	-0.202	0.499	1.63			-0.871	-1.36	0.219	-0.723	-0.165	-0.0941
0.937	1.87	-1.89	1.35	-1	0.667	0.348	1.63			-0.996	-1.23	0.45	-0.667	0.704	0.0157
1.2	1.77	-1.74	1.32	-1.37	0.371	0.00203	1.29			-0.98	-1.06	0.409	-0.691	0.636	0.243
1.02	1.9	-2.31	1.15	-1.36	0.0954	0.225	1.05			-0.887	-1.19	0.0925	-0.659	0.925	0.262
1.42	1.51	-2.91	1.19	-1.46	0.139	0.551	1.15			-0.899	-1.51	0.338	-0.471	0.887	-0.102
1.08	0.288	-2.3	0.829	-1.43	0.755	0.141	1.64			-0.869	-0.989	0.554	-0.258	1.41	0.201
0.701	0.942	-2.21	1.11	-0.749	1.07	-0.133	1.93			-0.684	-1.06	0.0514	-0.233	0.593	0.109
1.08	1.03	-2.66	1.35	-0.87	0.457	-0.0598	2.07			-0.635	-0.365	0.0123	-0.221	0.463	0.193
1.35	0.81	-2.02	1.32	-1.48	0.00276	0.125	1.75			-0.657	-0.558	-0.0737	-0.325	0.528	0.971
0.658	0.914	-2.03	1.88	-1.28	0.178	0.342	1.97			-0.877	-0.855	-0.122	-0.167	0.835	0.565
0.833	0.947	-3.09	1.43	-0.726	0.463	0.44	2.24			-0.678	-0.479	0.0622	-0.173	0.131	1.06
0.583	1.58	-1.99	1.01	-0.812	0.0652	0.307	1.9			-0.605	-0.532	0.0638	-0.209	0.589	0.929
0.666	0.0639	-2.55	1.18	-1.45	-0.201	0.0404	1.94			-0.599	-0.57	0.101	-0.0816	-0.0076	0.637
0.866	0.687	-1.85	1.8	-1.65	0.0854	0.461	2.09			-0.657	-0.959	-0.134	-0.17	0.0556	0.464
0.46	1.27	-2.13	1.33	-1.13	0.191	1.52	1.55			-0.655	-1.26	0.147	0.0332	0.445	0.881
0.922	1.22	-2.48	1.02	-0.54	0.153	1.65	1.4			-0.56	-1.18	-0.00372	0.0454	0.28	1.38
0.484	0.617	-2.38	1.18	-0.713	0.101	1.15	1.55			-0.667	-1.49	0.0952	0.004	0.0647	0.928
0.931	0.0673	-2.95	0.906	-1.36	0.0508	1.41	1.34			-0.496	-0.626	-0.0824	-0.122	0.256	1.35
0.605	0.189	-1.67	1.49	-1.58	-0.185	1.88	1.13			-0.521	-0.909	0.219	-0.0014	0.482	0.802
0.673	0.558	-2.76	1.07	-1.28	0.498	1.72	1.6			-0.602	-1.16	0.208	-0.297	0.544	1.11
0.696	0.325	-0.85	1.28	-0.672	1.17	1.39	1.57			-0.57	-1.31	0.0623	-0.494	0.707	1.22
0.565	0.718	-2.32	1.65	-0.359	0.437	1.14	1.44			-0.669	-1.31	0.0709	-0.392	0.755	0.897
1.02	0.404	-2.02	0.593	-0.925	-0.397	1	1.94			-0.448	-1.24	0.0123	-0.351	0.829	0.831
0.879	0.965	-2.58	1.15	-1.3	-0.491	1	1.9			-0.493	-1.18	0.0136	-0.46	0.295	0.605
0.733	0.167	-2.95	1.29	-1.07	-0.479	0.945	1.49			-0.818	-0.658	0.0126	-0.368	0.54	0.429
0.445	-0.0194	-1.72	0.796	-1.01	0.00201	0.711	1.56			-0.852	-0.172	0.0865	-0.439	0.288	0.332
0.581	0.0385	-2.88	1.26	-0.684	0.532	0.0598	1.33			-0.791	-0.0297	-0.0841	-0.6	0.282	0.216
0.571	0.51	-3.2	1.2	-0.0291	0.274	-0.0387	1.27			-0.947	-0.289	-0.128	-0.504	0.207	0.401
0.886	0.741	-2.98	0.769	0.0655	-0.239	0.388	1.24			-0.831	-0.306	-0.116	-0.518	0.394	0.0911
0.44	0.572	-2.2	1.02	-0.28	-0.446	0.752	1.43			-0.913	-0.971	-0.0221	-0.705	-0.0541	-0.0953
0.686	1.42	-2.26	1.55	-1.02	-0.395	0.461	1.54			-0.853	-0.394	0.0681	-0.541	0.488	-0.0805
1.09	0.308	-2.37	1.58	-1.56	-0.457	-0.0536	1.67			-0.908	-0.819	-0.269	-0.748	0.481	0.202
0.532	0.746	-2.61	1.84	-1.16	-0.652	-0.354	1.18			-0.767	-0.844	-0.0502	-0.818	0.102	-0.643
0.612	0.912	-2.55	1.63	-0.602	-0.434	0.242	0.926			-0.986	-0.454	0.0083	-0.765	0.528	-0.121
0.838	0.932	-1.93	1.55	-0.104	0.25	0.571	1.16			-0.829	-0.627	0.186	-0.651	0.366	-0.788
0.789	0.447	-2.54	1.87	-0.173	0.081	-0.00517	1.53			-0.968	-0.516	0.0746	-0.87	0.415	-0.821
0.32	0.411	-2.67	1.64	-0.948	-0.663	-0.201	1.53			-1.08	-0.653	-0.0317	-0.986	0.569	-0.55
0.71	-0.0171	-2.48	2.29	-1.21	-0.372	0.143	0.606			-0.959	-0.487	0.063	-1.13	0.921	-0.507
0.66	0.332	-1.77	1.65	-0.665	-0.0598	0.451	1.47			-0.945	-0.869	0.112	-1.04	-0.0173	-0.729
0.687	-0.392	-1.93	1.59	-0.585	-0.301	-0.386	0.929			-0.898	-0.864	0.0886	-0.637	0.547	-0.68
1.07	-0.0348	-2.87	1.62	-0.889	-0.523	-0.86	1.59			-0.784	-0.53	-0.0983	-0.707	0.488	0.627
0.798	-0.138	-2.9	1.89	-0.757	-0.598	-0.514	1.22			-0.878	-0.742	0.0593	-0.559	0.667	-0.236
0.421	-0.0915	-2.79	1.57	-0.753	-0.76	-0.0761	1.44			-0.802	-0.0897	0.245	-0.466	1.09	-0.116
0.974	0.878	-3.85	2.14	-0.948	-0.523	-0.128	0.954			-0.692	-1.11	0.119	-0.491	0.153	0.211
0.348	1.51	-3.15	1.27	-0.955	-0.207	-0.365	0.959			-0.739	-0.476	-0.0336	-0.657	0.332	-0.391
0.551	0.523	-3.17	1.69	-0.762	-0.471	-0.219	1.64			-0.609	-0.751	0.119	-0.658	0.209	-0.0814
0.53	0.497	-3	1.56	-0.519	-0.536	-0.0368	1.37			-0.751	-0.655	0.157	-0.803	0.36	0.247
0.87	0.357	-3.58	1.15	-0.817	-0.328	-0.2	1.71			-0.572	-0.887	0.42	-0.895	0.608	0.692
0.981	0.0787	-3.87	1.15	-1.22	-0.285	0.0616	1.86			-0.769	-1.11	0.81	-0.998	0.824	0.597
0.692	-0.107	-3	1.54	-1.16	-0.632	0.311	1.78			-0.604	-0.949	0.939	-0.731	0.855	1.28
1.06	-0.412	-3.02	1.11	-0.903	-0.766	0.143	1.69			-0.769	-1.3	1.23	-0.749	1.08	0.927
1.1	0.665	-3.09	1.2	-0.741	0.18	-0.176	1.51			-0.658	-1.15	1.07	-0.942	0.417	1.05
1.09	0.122	-2.37	1.12	-0.498	0.386	0.0898	1.55			-0.602	-1.76	1.16	-0.977	0.3	1.3
0.976	0.0394	-2.81	0.784	-0.339	-0.642	0.0175	1.45			-0.573	-1.47	0.856	-0.945	0.661	1.18
1.02	0.432	-2.74	0.424	-0.513	-0.87	-0.283	1.1			-0.592	-1.18	0.874	-1.22	0.212	1.58
1.11	0.224	-2.39	0.903	-0.763	-0.246	-0.205	1.25			-0.558	-0.866	0.735	-1.07	0.816	1.06
0.881	0.464	-3.6	0.697	-0.673	-0.173	0.0858	1.16			-0.497	-1.02	0.704	-0.873	0.604	1.56
0.732	-0.0869	-3.15	1.23	-0.27	0.00358	-0.0282	1.48			-0.583	-0.867	0.598	-0.757	0.00389	1.16
0.867	-0.117	-3.63	0.28	0.0854	0.39	-0.334	1.32			-0.62	-0.89	0.468	-0.649	0.259	1.24
0.877	-0.255	-2.39	0.699	-0.047	0.263	-0.672	1.52			-0.669	-1.15	0.434	-0.566	-0.0779	1.02
1.47	-0.0079	-1.6	0.131	-0.435	0.018	-0.517	1.73			-0.671	-1.11	0.258	-0.509	0.0299	0.904
1.11	0.551	-1.49	0.146	-0.789	-0.0749	0.0124	1.31			-0.741	-1.5	0.298	-0.536	-0.102	0.926
1.16	0.367	-1.38	0.463	-0.723	0.182	0.265	1.38			-0.677	-0.87	0.63	-0.552	0.117	0.837
1.19	0.726	-2.21	0.638	-0.807	0.746	0.0312	1.44			-0.629	-1.29	0.519	-0.46	0.00253	0.105
1.15	2.31	-2.1	0.517	-1.19	0.946	0.0214	1.45			-0.896	-0.998	0.367	-0.595	-0.0677	0.145
0.787	1.62	-0.895	0.287	-0.33	0.589	-0.171	1.49			-0.691	-1.6	0.447	-0.613	0.135	0.22
0.892	1.52	-1.35	0.0554	-0.113	0.471	-0.542	1.41			-0.768	-1.57	0.399	-0.584	0.202	0.141
0.725	1.66	-2.21	0.0462	-1.31	0.861	-0.437	0.584			-0.763	-1.41	0.19	-0.455	0.193	0.557
0.903	1.44	-2.1	0.239	-1.82	0.851	-0.655	1.06			-0.795	-1.02	0.521	-0.483	0.179	0.559
0.792	1.35	-1.73	-0.108	-1.08	0.8	-1.22	1.74			-0.665	-0.788	0.234	-0.503	0.0585	0.573
0.445	1.22	-2.13	0.206	-0.456	0.823	-0.995	1.34			-0.74	-1.1	0.192	-0.403	-0.251	0.652
0.917	0.972	-1.96	0.473	-0.673	0.388	-0.287	0.865			-0.547	-1.64	0.466	-0.39	-0.00944	0.691
0.874	1.04	-2.03	0.773	-0.55	0.193	-0.142	1.69			-0.586	-1.06	0.129	-0.476	0.0989	0.418
0.729	0.738	-1.8	0.654	-0.115	0.0857	-0.603	1.31			-0.685	-0.732	0.287	-0.675	-0.185	0.755
0.491	0.507	-2.08	0.446	-0.0852	0.0371	-0.52	1.23			-0.677	-0.953	-0.0241	-0.807	-0.0615	0.481
0.363	0.936	-2.27	0.249	-0.426	0.255	-0.107	1.41			-0.683	-0.761	0.335	-0.832	-0.171	1.14
0.966	1.43	-3.35	0.0367	-0.771	0.157	-0.00181	1.08			-0.762	-0.249	0.431	-0.933	-0.343	1.38
1.04	1.91	-2.9	-0.312	-1.16	-0.00207	-0.183	1.73			-0.779	-0.252	0.0502	-0.833	-0.145	1.18
0.871	2.62	-1.98	0.0125	-1.43	0.441	-0.37	1.31			-0.523	0.0381	0.257	-1.03	-0.193	1.14
0.908	2.14	-3.1	-0.145	-0.894	0.71	-0.5	1.18			-0.552	-0.0416	0.221	-1.13	-0.311	1.38
0.801	1.59	-1.66	-0.241	-0.267	0.0701	-0.0654	1.49			-0.598	-0.0702	0.0243	-1.42	-0.123	0.782
0.712	2.55	-2.52	-0.0791	-0.47	-0.197	0.663	1.36			-0.548	-0.462	0.295	-1.57	-0.526	0.918
0.695	2.78	-2.07	-0.0263	-0.575	0.0283	0.456	1.61			-0.476	-0.563	-0.00756	-1.46	-0.19	0.996
0.604	2.63	-1.42	-0.353	-0.355	0.351	-0.252	1.63			-0.824	-0.701	0.167	-1.27	-0.752	1.67
0.718	2.68	-1.98	-0.273	-0.452	-0.00733	-0.139	1.29			-0.918	-0.997	0.137	-1.17	-0.415	1.11
0.403	2.56	-2.95	-0.0741	-0.407	-0.311	0.0513	1.64			-0.734	-1.09	0.4	-1.25	-0.736	2.21
0.73	1.98	-2.05	0.0185	-0.152	0.0159	-0.218	1.9			-0.936	-0.76	0.42	-1.31	-0.349	1.78
0.478	1.81	-2.75	-0.138	-0.528	0.023	-0.0949	1.02			-0.722	-0.841	0.165	-1.37	-0.634	1.6
0.381	1.34	-1.9	-0.343	-0.806	-0.0466	0.0773	0.98			-0.943	-0.511	0.184	-1.29	-0.576	1.23
0.275	1.4	-2.71	-0.184	-0.695	0.0753	-0.186	0.831			-0.724	-1.18	0.385	-1.08	0.506	1.49
0.315	1.65	-2.13	-0.0461	-0.632	0.21	-0.6	1.48			-0.934	-1.05	0.123	-1.37	-0.496	1.48
0.0615	1.69	-1.3	-0.53	-0.854	0.353	-0.69	2.36			-0.805	-1.14	0.197	-1.51	-0.57	1.45
0.602	1.19	-1.12	-0.6	-1.08	0.345	-0.597	2.18			-0.663	-0.897	0.218	-1.4	-0.0431	1.84
0.415	1.56	-0.857	-0.417	-0.969	0.264	-0.254	3.12			-0.905	-0.0962	0.0706	-1.33	-0.0318	2.33
0.2	1.52	-1.61	0.305	-0.916	0.166	0.354	2.41			-0.958	-0.336	0.231	-0.996	-0.291	1.65
0.364	1.88	-2.23	-0.912	-1	0.443	0.391	2.1			-0.929	-0.971	0.378	-0.709	0.0783	1.71
0.671	1.85	-1.44	-1.35	-0.414	0.599	-0.00468	2.45			-0.9	-0.796	0.0923	-0.965	0.16	0.833
0.633	1.23	-1.74	-1.25	-0.0587	0.176	-0.186	2.19			-1.05	-0.759	0.366	-1.24	-0.102	0.973
0.464	1.01	-0.614	-0.548	-0.729	0.263	0.0969	1.83			-1.11	-1.12	0.364	-1.22	-0.222	0.89
0.304	1.25	-0.917	0.00332	-1.69	0.587	0.233	1.62			-1.09	-1.23	0.172	-1.12	0.648	0.901
0.291	0.467	-1.08	-0.143	-1.83	0.592	0.017	2.29			-0.955	-1.55	0.274	-1.07	0.525	0.942
0.293	0.175	-0.316	0.0602	-1.35	0.615	-0.259	1.95			-0.965	-1.34	0.0891	-1.03	0.471	-0.125
0.724	0.252	-0.972	-0.0352	-0.883	0.774	-0.589	1.93			-0.671	-1.39	0.575	-1.24	0.382	-0.268
0.391	-0.182	-0.825	0.0224	-0.597	0.242	-0.098	2.24			-0.62	-1.52	0.358	-0.946	0.674	-0.171
0.369	0.825	-0.452	0.187	-0.598	0.0455	0.488	1.88			-0.798	-1.69	0.0378	-0.988	0.71	-0.504
0.612	0.514	-1.49	0.0533	-0.612	0.263	0.0711	1.5			-0.988	-0.93	0.116	-0.959	0.484	0.103
0.71	0.61	-1.56	-0.333	-0.831	0.165	-0.579	2.13			-0.968	-1.09	0.223	-0.911	0.435	-0.474
0.652	0.565	-1.2	0.0869	-1.38	0.264	-0.518	1.3			-0.951	-1.18	0.429	-0.928	0.061	-0.604
0.227	1.08	-0.31	-0.0984	-1.27	0.592	-0.00602	2			-0.923	-1.54	0.154	-1.01	-0.148	-0.602
-0.0317	0.285	-0.958	-0.0328	-0.773	0.405	0.0242	1.86			-1.05	-1.44	0.251	-1.1	0.146	-0.0393
0.558	0.0223	-0.438	-0.237	-0.913	0.135	-0.348	1.63			-1.06	-1.19	0.618	-1.01	0.276	-0.147
0.565	0.672	-0.197	0.467	-0.964	-0.194	0.304	1.84			-0.958	-0.896	0.922	-0.995	-0.071	-0.293
0.449	-0.168	-0.628	-0.0458	-0.827	-0.106	0.789	1.61			-0.877	-1.23	1.14	-1.23	-0.188	-0.478
0.417	0.583	-1.44	-0.0958	-1.22	0.683	0.0117	1.7			-0.904	-1.45	1.6	-1.2	-0.0731	0.0128
0.526	-0.24	-0.868	-0.233	-1.45	1.54	-0.277	1.76			-0.832	-1.36	1.13	-1.06	0.268	0.056
0.711	0.416	-1.33	-0.245	-1.39	1.54	0.131	1.79			-0.623	-1.22	1.29	-1.21	0.184	-0.477
0.545	-0.255	-1.1	-0.0155	-1.35	0.91	0.331	1.25			-0.802	-1.18	1.2	-0.978	0.26	-0.0582
0.711	-0.116	-0.0961	0.148	-0.777	0.275	0.105	2.13			-0.755	-1.45	1.26	-1.2	0.291	-0.329
0.975	-0.323	-0.717	0.306	-0.205	0.225	-0.218	2.79			-0.728	-1.26	1.23	-1.2	0.867	-0.0512
0.926	-0.609	0.075	-0.223	-0.411	0.202	0.185	2.58			-0.828	-1.13	1.27	-0.99	0.128	-0.103
0.861	-0.994	0.0457	-0.427	-0.889	0.636	0.784	3.08			-0.816	-0.217	1.32	-0.955	0.183	-0.00111
0.455	-0.621	0.591	-0.351	-0.944	0.301	0.841	2.63			-0.738	-0.118	1.19	-1.22	-0.077	-0.295
0.646	-0.53	-0.559	-0.44	-0.863	-0.3	0.523	2.4			-0.762	0.014	1.41	-1.2	0.248	-0.0399
0.736	-0.675	0.112	-0.297	-0.783	-0.234	0.192	2.65			-0.835	-0.739	1.19	-0.954	-0.0617	0.0542
0.331	0.135	-0.299	-0.169	-0.73	0.48	0.0113	2.81			-0.943	-0.586	1.65	-0.92	0.0547	-0.574
0.363	-0.764	-0.514	-0.421	-1.15	0.979	-0.188	2.29			-0.808	-0.227	1.32	-0.807	-0.726	-0.154
0.641	-0.501	0.608	-0.179	-1.08	0.737	-0.152	2.8			-0.816	0.0067	1.28	-0.962	-0.391	-0.0589
0.702	-0.586	0.00834	-0.14	-0.363	0.326	0.55	2.38			-0.755	-0.435	1.36	-0.921	-0.618	-0.688
0.603	-0.472	-0.555	-0.369	-0.429	0.306	0.875	2.81			-0.679	-0.482	1.5	-0.838	-0.882	-0.793
0.339	-0.427	-0.0113	-0.129	-0.79	0.644	0.985	2.48			-0.759	-1.16	1.48	-1.06	-0.583	-0.765
0.456	-0.616	-0.18	-0.144	-0.485	0.207	1.13	2.35			-0.834	-0.206	1.3	-1.02	-0.325	-0.694
0.643	-0.657	0.358	0.278	0.0213	0.274	0.496	2.52			-0.698	0.0509	1.25	-1.03	-0.474	-0.447
0.254	-0.791	-0.168	-0.193	-0.322	0.45	-0.197	2.56			-0.666	-0.374	1.35	-1.08	-0.924	-0.749
0.0139	-0.906	-0.643	0.0153	-0.874	0.00788	-0.0714	2.65			-0.624	-0.162	1.31	-0.875	-0.906	-0.599
0.205	-1.09	0.71	-0.00744	-0.902	-0.0805	0.407	2.21			-0.697	0.275	1.28	-1.14	-0.771	-0.966
0.532	-1.22	0.807	0.37	-0.992	0.673	1.01	2.12			-0.665	0.155	0.855	-1.23	-0.734	-0.915
0.614	-1.38	0.434	0.762	-0.789	0.377	1.46	2.37			-0.618	-0.164	0.971	-1.08	-0.862	-0.552
0.132	-0.839	0.493	0.334	-0.428	0.272	1.05	2.1			-0.778	0.787	1.22	-0.929	-0.825	-1.43
-0.207	-1.13	0.0594	0.0882	-0.717	0.668	0.484	1.53			-0.746	0.403	1.35	-0.99	-0.706	-0.967
0.32	-1.13	0.419	0.421	-0.956	0.585	0.659	1.76			-0.743	0.274	1.16	-1.24	-0.606	-0.651
0.186	-1.4	1.31	0.215	-0.814	0.202	0.69	2.15			-0.665	-0.15	1.26	-1.27	-0.662	-0.897
0.567	-0.879	0.324	0.261	-0.781	0.215	0.614	1.9			-0.635	-0.0628	1.34	-1.34	-0.291	-0.747
0.806	-1.43	-1.13	0.673	-1.26	0.312	0.897	2.37			-0.51	-0.387	1.15	-1.35	-0.642	-0.984
0.216	-1.37	0.375	1.24	-1.52	0.0511	0.715	2.02			-0.583	-0.308	1.33	-1.4	-0.782	-1.34
0.703	-1.29	-0.361	1.44	-1.4	-0.284	0.198	1.63			-0.616	-0.0636	1.23	-1.54	-0.715	-1.1
0.254	-1.1	1.08	1.46	-1.74	-0.413	0.277	1.96			-0.574	-0.727	1.16	-1.72	-0.779	-1.03
-0.347	-1.57	0.852	1.73	-1.64	-0.0826	0.804	2.06			-0.648	-0.72	1.38	-1.63	-1.12	-0.734
0.283	-1.35	0.503	1.63	-1.04	0.58	1.11	2.04			-0.6	-0.337	1.39	-1.64	-0.744	-0.703
0.357	-1.16	0.246	1.6	-0.775	0.942	0.91	1.59			-0.672	-0.517	1.46	-1.58	-0.973	-0.221
-0.147	-1.6	0.229	1.15	-0.807	1.15	0.523	2.25			-0.612	-0.697	1.18	-1.27	-1.22	-0.307
0.12	-1.64	-0.532	1.72	-0.526	1.23	0.31	2.46			-0.754	-0.419	1.46	-1.29	-1.31	-0.928
0.132	-1.62	-0.689	1.35	-0.0623	1.19	0.408	2.33			-0.575	-0.0104	1.34	-1.43	-1.39	-0.675
0.421	-1.81	0.926	1.73	-0.045	1.2	0.0643	1.68			-0.686	0.283	1.51	-1.56	-1.07	-0.688
0.996	-1.79	0.398	1.45	-0.816	0.979	-0.0589	2.02			-0.648	0.531	1.46	-1.54	-0.955	-0.715
-0.0222	-1.28	0.759	1.51	-1.22	0.872	0.0984	2.33			-0.709	1.17	1.54	-1.31	-0.47	-0.458
0.305	-1.29	1.28	1.15	-0.68	0.647	-0.243	1.84			-0.664	1.33	1.26	-1.13	-1.3	-1.18
0.148	-1.84	0.0593	1.33	-0.123	0.463	-0.0423	1.93			-0.675	1.31	1.66	-1.03	-0.856	-0.488
0.458	-1.8	0.00487	1.61	-0.492	0.667	0.461	2.25			-0.605	0.256	1.39	-1.09	-0.759	-0.104
0.349	-1.99	-0.0397	1.33	-0.745	0.646	-0.241	2.34			-0.681	-0.257	1.49	-1.27	-0.773	-0.245
0.131	-0.894	-0.392	1.35	-0.0303	0.717	-0.705	2.49			-0.689	0.178	1.12	-1.36	-1.03	-0.841
0.0814	-1.22	1.44	1.6	0.0997	0.541	-0.325	2.62			-0.728	0.166	1.56	-1.38	-1.07	-0.317
0.217	-1.19	0.278	1.53	-0.31	0.082	-0.0301	2.77			-0.722	-0.147	1.75	-1.27	-0.617	-0.432
0.394	-1.36	0.366	1.25	-0.65	0.0775	-0.575	3.14			-0.691	-0.146	1.82	-1.3	-0.96	-0.296
0.0862	-0.879	0.712	1.45	-0.826	0.361	-0.874	2.68			-0.814	0.126	1.32	-1.25	-0.805	-0.457
-0.0373	-1.38	-0.197	2.35	-0.514	0.272	-0.606	3.26			-0.979	-0.808	1.36	-1.27	-0.962	-0.0658
-0.0871	-1.61	0.299	1.24	-0.446	-0.356	-0.518	2.78			-0.842	-0.092	1.43	-1.29	-1.19	0.277
-0.142	-2.02	1.35	1.6	-0.798	-0.583	-0.617	2.72			-0.886	0.316	1.47	-1.22	-0.447	0.395
-0.477	-1.73	0.672	1.47	-0.911	-0.166	-0.0608	2.79			-0.869	-0.433	1.33	-1.11	-0.873	0.243
0.00925	-2.04	0.337	1.35	-0.478	0.116	-0.0155	2.58			-0.961	-0.812	1.41	-1.14	-1	0.295
0.0487	-1.19	1.35	1.33	-0.32	0.148	-0.629	2.85			-1.02	-0.24	0.973	-1.08	-0.783	0.399
-0.635	-1.5	0.428	0.863	-0.293	0.198	-0.997	2.43			-1.09	-0.306	0.951	-1.05	-1.35	0.0363
0.305	-1.67	1.08	0.972	-0.0197	-0.202	-1.29	2.63			-1.03	-0.575	1.01	-1.01	-1.53	-0.0956
0.22	-1.42	0.173	1.27	-0.379	-0.183	-1.27	2.67			-0.854	-0.775	1.12	-1.1	-1.08	0.662
0.0122	-1.43	-0.229	1.28	-1.07	0.422	-0.12	2.05			-0.903	-0.627	1.1	-1.12	-1.42	0.67
-0.157	-1.77	0.437	1.15	-1.04	-0.000131	0.356	2.12			-0.869	-0.744	0.968	-1.04	-1.06	0.652
0.157	-1.75	-0.0952	1.09	-0.954	-0.581	-0.633	2.23			-0.853	-0.591	1.39	-0.891	-1.54	0.257
0.257	-1.7	0.887	0.875	-1.23	-0.33	-1.01	2.11			-1.02	-0.462	1.43	-0.814	-1.31	0.617
-0.129	-1.82	0.415	0.892	-1.15	-0.398	-0.00755	2.04			-0.867	-0.418	1.55	-0.819	-1.15	0.665
-0.00316	-2.2	1.72	1.11	-0.841	-0.504	0.111	1.93			-0.816	-0.374	1.76	-0.831	-1.53	0.286
0.0849	-1.76	0.0205	0.909	-0.934	-0.315	-0.479	2.07			-0.842	-0.582	1.68	-0.857	-1.54	0.509
0.241	-1.41	0.971	0.71	-0.837	-0.21	-0.557	2.75			-0.945	-0.909	1.45	-0.757	-1.26	0.773
-0.28	-2.29	1.21	0.777	-0.507	-0.228	-0.34	2.38			-0.764	-0.734	1.37	-0.646	-1.36	0.687
0.215	-1.83	-0.203	0.783	-0.592	0.0993	0.177	2.5			-0.674	0.212	1.37	-0.658	-1.55	1.09
0.561	-0.751	0.549	0.526	-0.415	0.114	0.364	2.7			-0.626	0.435	1.65	-0.694	-1.38	0.713
0.054	-1.12	0.71	0.641	-0.261	-0.399	0.184	2.06			-0.451	0.278	1.49	-0.673	-1.61	0.238
0.626	-1.88	1.21	0.0963	-0.877	-0.696	-0.059	1.94			-0.377	0.749	1.07	-0.899	-1.61	0.175
0.512	-1.88	0.315	0.157	-1.3	-0.56	-0.664	2			-0.189	0.383	1.33	-1.07	-1.69	0.784
0.579	-1.73	-0.67	0.589	-0.877	-0.868	-0.689	2.09			-0.311	0.195	1.31	-0.977	-1.56	1.12
0.401	-1.27	-0.126	0.652	-0.893	-0.756	-0.0863	2.82			-0.244	0.273	0.906	-0.973	-1.53	1.08
0.462	-0.998	-0.211	0.545	-0.663	-0.752	0.0682	2.95			-0.434	0.437	1.14	-0.926	-1.44	0.501
0.359	-1.25	-0.757	0.46	-0.63	-0.759	-0.181	2.93			-0.416	0.523	1.07	-0.925	-1.12	0.706
0.255	-0.801	-0.884	1.07	-0.635	-0.633	-0.237	2.6			-0.445	0.204	0.94	-0.899	-0.812	1.39
0.163	-1.09	-0.262	0.863	0.0417	-0.997	-0.169	2.65			-0.493	0.62	1.22	-0.778	-1.04	0.842
0.516	-1.66	-0.95	1.37	-0.308	-0.885	-0.54	2.85			-0.611	0.42	1.13	-0.792	-1.84	0.711
0.165	-1.09	0.251	0.841	-1.11	-0.0596	-0.828	2.32			-0.569	0.41	0.666	-0.831	-1.31	1.15
0.0244	-0.932	-0.453	1.41	-1.17	0.0527	-0.573	2.81			-0.458	0.123	1.06	-0.795	-1.09	0.864
0.289	-1.77	-0.845	1.51	-0.714	-0.206	-0.66	2.54			-0.479	0.562	0.615	-0.842	-0.931	0.661
-0.258	-1.53	-1.75	1.02	-0.389	-0.182	-0.942	3.02			-0.476	-0.12	0.684	-0.863	-1.32	0.266
-0.0714	-1.44	0.244	1.09	-0.556	0.0629	-0.663	3.2			-0.621	0.215	0.942	-0.716	-1.63	0.455
0.353	-0.669	-0.0347	0.986	-0.807	0.0791	-0.333	3.46			-0.588	0.138	0.594	-0.462	-1.44	0.241
0.374	-0.683	-0.516	1.43	-0.909	-0.138	-0.25	2.8			-0.371	-0.161	0.876	-0.429	-1.34	-0.232
-0.139	-0.306	-0.18	1.08	-0.91	-0.174	-0.262	3.29			-0.605	-0.307	0.732	-0.524	-1.14	0.356
0.104	-1.01	0.347	1.17	-0.662	-0.245	-0.182	3.67			-0.405	-0.462	0.54	-0.499	-1.38	0.0452
-0.274	-1.24	-0.352	0.869	-0.752	-0.121	-0.292	3.15			-0.541	-0.42	0.651	-0.642	-1.7	-0.566
-0.0738	-0.683	-0.21	1.05	-1.17	-0.157	-0.734	2.92			-0.623	-0.367	0.48	-0.731	-1.43	-0.611
0.0279	-0.721	-0.493	1.04	-1.16	0.13	-0.543	2.98			-0.759	-0.436	0.65	-0.589	-1.73	-0.81
-0.00978	-0.959	-0.587	1.04	-0.993	0.66	-0.137	3.34			-0.578	-0.424	0.255	-0.474	-2.21	-0.591
-0.526	-1.3	-0.572	0.908	-0.736	0.69	-0.203	3.01			-0.72	-0.201	0.266	-0.505	-1.13	-0.401
-0.0916	-1.48	-1.45	0.396	-0.599	0.5	-0.71	3.18			-0.643	-0.504	0.263	-0.396	-1.41	-0.421
-0.409	-1.67	-0.0353	0.921	-0.662	-0.414	-0.823	3.05			-0.786	-1.23	0.49	-0.367	-1.93	-0.482
-0.237	-1.64	-0.457	0.589	-0.775	-0.735	-0.792	2.91			-0.685	-1.06	0.492	-0.223	-1.58	-0.959
-0.43	-0.392	-0.825	1.17	-1.2	0.18	-0.828	3.03			-0.637	-1.16	0.556	-0.336	-1.78	-1.01
-0.799	-1.21	-0.558	0.817	-1.18	1.69	-0.31	2.84			-0.55	-0.341	0.285	-0.396	-1.61	-0.736
-0.435	-0.751	-1.37	0.425	-0.61	1.58	-0.114	2.86			-0.619	-0.388	0.329	-0.54	-1.32	-0.703
-0.233	-0.653	-0.57	0.744	-0.724	0.83	-0.665	3.45			-0.37	-1.23	0.398	-0.568	-1.59	-0.931
0.275	-0.326	-1.43	0.44	-1.22	1.71	-0.949	3.12			-0.439	-0.855	0.372	-0.625	-1.6	-0.894
-0.279	-0.698	0.684	0.636	-0.734	2.87	-0.727	3.18			-0.495	-0.566	0.321	-0.715	-1.49	-0.927
-0.305	-1.03	0.245	0.484	-0.78	2.33	-0.226	3.8			-0.556	-0.783	0.282	-1.03	-1.53	-1.12
-0.307	-0.802	1.18	0.645	-1.39	1.72	-0.106	3.45			-0.56	-0.685	0.303	-1.16	-1.09	-1.51
-0.172	-0.52	-0.129	0.759	-1.28	2.16	-0.361	3.66			-0.52	-0.9	0.0231	-0.988	-1.41	-1.8
-0.18	-0.794	-0.801	0.757	-1.24	2.17	-0.54	3.65			-0.457	-0.717	0.214	-0.999	-1.23	-1.48
0.042	-1.3	-0.096	0.849	-1.49	1.52	-0.684	3.38			-0.423	-0.704	0.297	-0.944	-1.06	-1.81
-0.142	-1.12	0.13	0.751	-1.16	1.64	-0.564	3.89			-0.389	-1.07	0.11	-1.05	-1.11	-1.23
-0.813	-0.889	-0.797	0.9	-0.809	2.35	-0.336	3.68			-0.412	-0.584	0.466	-0.961	-0.475	-1.29
-0.521	-0.756	-0.329	0.372	-1.16	2.52	-0.606	3.82			-0.368	-1.35	0.226	-0.814	-0.974	-2.03
-0.558	-0.823	-0.584	0.625	-1.56	1.72	-0.841	4.15			-0.31	-1.4	0.354	-0.69	-0.914	-1.54
-0.485	-0.411	-0.463	0.64	-0.7	1.25	-0.00262	4.05			-0.346	-1.16	0.482	-0.616	-1.27	-1.4
-0.534	-0.579	-0.743	0.569	0.0815	1.68	0.131	4.11			-0.415	-0.181	0.514	-0.718	-1.22	-1.59
-0.438	-0.474	0.283	0.631	-0.428	1.86	-0.957	3.98			-0.299	-1.67	0.644	-1.03	-1.19	-1.68
-0.423	-1.33	-0.468	0.228	-1.08	1.65	-1.14	3.75			-0.141	-1.06	0.678	-1.32	-1.49	-1.75
-0.938	-1.12	-0.00904	0.561	-1.26	1.65	-0.4	3.56			0.0785	-0.913	0.665	-1.32	-1.33	-1.07
-0.23	-1.02	-0.269	0.652	-1.09	1.85	-0.115	3.61			-0.0617	-1.17	0.432	-1.23	-1.58	-1.09
-0.338	-0.622	-0.799	0.258	-0.627	2.19	-0.522	3.53			0.0928	-0.896	0.406	-1.03	-1.2	-0.96
-1.21	-1.45	-0.239	0.324	-0.623	2.01	-0.388	3.51			0.0838	-0.767	0.333	-0.951	-0.208	-1.25
-0.477	-1.36	-0.454	0.392	-1.37	1.64	0.333	3.46			0.34	-1.62	0.403	-1.1	-0.941	-1.07
-0.762	-1.19	-1.14	0.327	-1.91	2.23	-0.165	2.96			0.489	-0.551	0.355	-1.18	-0.797	-1.36
-0.37	-0.765	0.442	0.274	-1.58	2.86	-0.885	3.45			0.434	-0.979	0.642	-0.614	-0.678	-0.971
-0.681	-0.361	-0.0828	-0.184	-1.23	2.42	-0.572	3.15			0.457	-0.691	0.349	-0.519	-0.665	-1.43
-0.345	-0.344	-0.877	0.172	-1.21	1.58	-0.238	2.35			0.235	-1.04	0.502	-0.615	-0.262	-1.63
-0.504	-0.456	-0.441	0.116	-1.11	1.23	-0.0208	2.67			0.246	-1.03	0.312	-0.751	-0.147	-0.965
-0.499	-0.759	-0.972	-0.425	-1.15	1.9	0.111	1.81			0.207	-1.25	0.199	-0.83	-0.587	-1.49
-0.662	-1.16	0.0675	-0.203	-1.51	2.64	-0.0581	2.34			0.219	-0.959	0.141	-0.932	-0.551	-1.36
-0.645	-0.732	-0.54	0.451	-1.29	2.42	-0.218	2.19			0.239	-1.15	0.594	-0.706	-0.629	-1.6
-0.892	-0.355	-0.781	0.428	-0.872	1.75	0.119	2.25			0.0378	-1.28	0.248	-0.502	-0.391	-1.49
-0.608	-1	-0.214	0.766	-0.749	1.79	0.328	2.24			0.229	-0.48	0.401	-0.215	-0.783	-1.99
-0.666	-1.43	-1.14	0.745	-0.746	3.03	0.121	2.18			0.104	-1.2	0.238	-0.341	-0.974	-1.86
-0.6	-0.958	-0.329	0.995	-0.601	3.23	-0.0631	2.83			0.325	-1.61	0.42	-0.285	-0.92	-1.32
-0.775	-1.38	-0.499	1.18	-0.733	1.82	-0.537	3.04			0.251	-0.975	0.245	-0.187	-0.822	-1.85
-0.752	-1.41	-0.574	0.975	-0.58	0.707	-0.554	2.69			0.0976	-1.46	0.209	-0.425	-0.77	-1.12
-0.779	-1.3	-0.516	1.18	-0.498	1.59	-0.463	2.71			0.153	-1.43	0.253	-0.485	-1.02	-1.42
-0.497	-0.727	0.164	0.619	-1.36	1.94	-0.993	2.37			0.0571	-1.22	-0.0331	-0.514	-1.01	-1.26
-0.0766	-0.754	-0.0873	0.891	-1.74	1	-0.807	2.36			-0.00591	-1.21	0.23	-0.532	-1.37	-1.4
-0.588	-0.931	-0.0423	0.457	-1.3	0.486	-0.148	2			-0.0117	-0.918	0.254	-0.434	-1.43	-1.05
-0.956	-0.567	0.871	0.51	-0.956	0.62	0.137	2.99			-0.0681	-0.33	0.272	-0.257	-1.44	-1.55
-0.662	-0.764	0.0741	1.15	-0.902	0.77	0.063	2.74			0.142	-0.599	0.0661	-0.294	-1.13	-1.61
-0.232	-1.17	0.0633	1.2	-0.975	1.41	-0.366	2.49			0.0729	-0.735	0.326	-0.143	-1.09	-1.32
-0.553	-0.566	1.41	1.04	-1.04	1.7	-0.749	2.26			0.0517	-0.953	0.0073	-0.376	-1.36	-1.47
-0.453	-0.135	-0.751	0.886	-1.06	1.26	-0.243	2.31			-0.0194	-1.09	0.132	-0.467	-1.06	-1.69
-0.51	-0.678	0.66	1.45	-0.841	0.558	0.461	2.59			-0.0475	-0.808	0.00343	-0.564	-1.08	-1.13
-0.785	-0.883	0.361	1.04	-0.688	0.634	0.0964	2.07			-0.16	-0.735	-0.0793	-0.498	-1.24	-2.02
-0.692	-0.737	-0.132	1.18	-0.994	1.18	-0.562	2.07			-0.195	-1.22	0.178	-0.672	-0.99	-1.42
-0.301	-0.713	-0.534	0.605	-1.35	0.502	-0.706	2.33			-0.24	-0.661	-0.119	-0.59	-1.2	-1.65
-0.221	-0.441	0.488	0.893	-1.54	0.106	-0.347	2.07			-0.0808	-0.744	-0.0673	-0.464	-0.987	-1.66
-0.693	-1.16	1.31	0.484	-1.61	0.57	-0.0688	2.06			-0.173	-1.04	-0.11	-0.41	-1.51	-1.97
0.0338	-1.09	1.68	0.205	-1.23	0.357	-0.286	2.12			-0.199	-1.33	-0.156	-0.553	-1.16	-1.7
-0.308	-1.39	0.724	-0.331	-0.895	0.0452	-0.138	2.14			-0.12	-1.91	-0.154	-0.728	-1.06	-1.65
-0.575	-1.26	1.46	-0.429	-0.776	0.206	0.354	2.39			-0.137	-1.2	0.0394	-0.817	-1.16	-1.56
-0.375	-1.44	0.291	-0.335	-0.906	0.387	0.2	2.53			-0.0898	-1.18	0.0753	-0.988	-1.13	-1.29
-0.487	-1.61	0.976	-0.186	-0.923	0.484	-0.0444	2.42			-0.111	-1.52	-0.0539	-0.983	-0.993	-1.12
-0.688	-1.4	1.13	-0.754	-0.604	0.307	0.175	2.36			-0.199	-1.45	-0.011	-1.06	-1.09	-1.43
-0.666	-1.8	0.366	-0.347	-0.916	-0.123	0.33	1.94			-0.226	-1.25	-0.0338	-1.15	-1.02	-1.61
0.248	-0.733	-0.0967	-0.431	-1.57	-0.101	0.274	2.37			-0.271	-1.35	0.108	-1.03	-1.15	-1.28
-0.37	-1.23	0.612	-0.743	-1.38	0.4	0.353	2.77			-0.378	-1.3	0.151	-1.08	-1.32	-0.971
-0.287	-0.981	-0.0091	-0.926	-1.16	0.846	0.355	2.44			-0.318	-1.52	0.0491	-1.22	-1.14	-1.01
-0.469	-1.21	-0.143	-1.09	-1.35	1.43	0.128	2.73			-0.413	-0.852	0.0442	-1.34	-1.39	-1.01
-0.693	-0.892	0.162	-0.793	-1.22	1.68	-0.149	2.69			-0.393	-0.803	-0.0699	-1.28	-1.61	-1.1
-0.541	-1.19	0.324	-0.576	-1.02	0.703	0.417	2.61			-0.425	-1.22	0.154	-1	-1.86	-0.631
-0.38	-0.765	-0.296	-0.752	-1.07	0.208	0.88	3.8			-0.428	-1.55	0.183	-1.01	-1.07	-0.878
-0.899	-1.35	-0.878	-0.524	-0.92	0.717	0.559	2.66			-0.381	-0.604	-0.0284	-1.09	-0.429	-0.866
-0.579	-1.22	-0.386	-0.965	-1.3	1.05	0.547	2.5			-0.374	-0.595	0.136	-1.32	-0.531	-1.17
-0.149	-1.14	0.196	-0.512	-1.56	0.931	0.86	2.86			-0.38	-1.22	0.162	-1.08	-0.509	-0.999
-0.865	-1.36	-0.0163	-0.315	-1.23	0.809	0.716	1.77			-0.234	-1.47	-0.0279	-1.39	-0.362	-1.09
-0.425	-1.11	-0.0381	-0.455	-1.28	0.745	0.706	2.75			-0.0347	-1.28	0.162	-0.834	-0.739	-0.892
-0.478	-1.14	0.093	0.0966	-1.49	0.261	0.821	2.97			-0.0298	-0.678	-0.214	-0.505	-0.146	-0.889
0.00386	-1.12	0.311	-0.691	-1.07	-0.0115	0.428	2.47			-0.081	-1.1	0.23	-0.546	0.0651	-0.481
-0.514	-1.29	-0.48	-0.661	-0.749	0.0682	0.275	3.03			-0.0356	-1.2	-0.352	-0.588	-0.37	-0.701
-0.267	-1.03	-0.308	0.212	-0.836	0.107	0.376	2.56			0.0195	-0.956	-0.123	-0.712	-0.524	-1.19
-0.351	-0.548	-0.237	0.334	-1.22	0.237	0.161	2.79			-0.0156	-0.933	0.00992	-0.753	-0.616	-1.37
-0.399	-1.26	-0.491	0.161	-1.58	0.0782	0.141	2.05			0.0236	-0.936	0.084	-0.82	-0.668	-0.912
-0.212	-1.32	-0.288	-0.172	-1	0.154	0.61	2.47			-0.00194	-0.943	0.368	-0.842	-0.949	-1.46
-0.782	-1.23	0.158	-0.465	-0.592	0.368	0.0875	3.53			0.0454	-1.89	0.269	-0.985	-0.95	-1.01
-0.415	-1.33	-0.379	-0.0568	-0.867	0.289	-0.396	3.08			-0.124	-1.35	0.27	-1.31	-0.583	-1.48
-0.181	-1.06	-0.728	0.557	-1.6	0.163	0.191	2.84			-0.0571	-1.7	0.261	-1.28	-0.531	-1.07
-0.658	-1.8	-1.04	-0.193	-1.85	0.394	0.497	3.71			-0.0268	-1.62	0.238	-1.31	-0.842	-1.15
-0.163	-2.2	0.207	-0.0741	-1.55	0.558	0.13	3.51			-0.151	-1.01	0.199	-1.13	-1.08	-1.78
-0.457	-2.13	0.637	-0.0255	-1.58	0.388	0.64	3.76			-0.103	-1.41	0.173	-0.934	-0.617	-0.834
-0.518	-1.41	0.878	0.00303	-0.956	0.629	0.984	3.44			-0.0679	-0.947	0.557	-0.894	-0.988	-1.1
-0.597	-1.32	1.52	-0.116	-0.613	1.02	0.484	3.35			0.0192	-1.84	0.237	-1.01	-0.612	-0.644
-0.497	-1.63	0.621	0.311	-1.47	0.805	0.459	3.41			0.00216	-1.38	0.452	-1.22	-0.651	-1.31
-0.413	-0.691	0.886	0.999	-1.34	0.315	0.627	2.98			-0.0799	-1.67	0.5	-1.24	-0.937	-0.884
-0.51	-0.526	1.2	0.964	-0.554	0.59	0.312	3.22			0.00292	-1.78	0.488	-1.34	-0.891	-1.03
-0.293	0.0365	0.907	0.64	-0.709	0.411	0.572	2.97			0.0895	-1.47	0.204	-1.17	-0.998	-0.847
-0.189	-0.728	2.19	0.499	-1.09	0.0285	0.601	3.19			-0.0292	-1.28	0.354	-1.09	-0.481	-0.869
0.0969	-0.47	1.91	0.722	-1.19	0.121	0.19	3.46			-0.0407	-1.36	0.526	-1.15	-0.74	-1.01
-0.599	-0.74	0.901	0.68	-1.09	0.549	-0.129	3.33			0.0338	-1.9	0.439	-1.09	-0.711	-0.947
-0.61	-0.262	-0.0232	0.418	-0.804	0.663	0.0354	3.16			0.00458	-1.47	0.727	-0.859	-0.792	-1.41
0.0375	-0.834	1.59	0.596	-0.761	0.18	-0.0407	3.22			0.089	-1.88	1.03	-0.764	-1.01	-1.82
0.123	-0.519	1.47	0.88	-1.31	-0.124	-0.11	2.87			-0.0276	-1.37	0.859	-0.969	-0.663	-1.6
0.065	-0.73	0.708	1.05	-1.53	0.0785	0.496	3.36			0.156	-1.76	0.987	-1.21	-1.4	-0.676
0.345	-0.752	1.3	0.496	-1.26	0.277	0.852	3.2			0.128	-1.78	0.863	-1.42	-1.23	-1.58
0.119	0.101	-0.309	0.555	-1.14	0.182	0.146	2.53			0.0226	-1.57	0.91	-1.36	-0.821	-1.55
0.838	-0.574	1.15	0.793	-1.06	-0.278	-0.615	2.77			0.165	-1.59	1.12	-1.54	-0.734	-1.62
-0.00519	-0.163	0.213	0.27	-1.42	0.027	-0.0477	2.66			0.49	-0.972	0.936	-1.39	-1.38	-1.6
-0.0794	-0.877	0.537	0.424	-1.41	0.155	-0.0693	2.67			0.42	-1.11	0.891	-1.14	-1.23	-1.66
0.141	-1.34	0.285	-0.234	-0.632	0.0525	-0.585	2.3			0.538	-1	1.03	-0.934	-1.07	-1.14
-0.0639	-0.711	0.525	0.0718	-0.904	0.214	0.0581	1.99			0.553	-0.832	1.15	-1.01	-0.86	-1.5
-0.00222	-0.64	0.0627	-0.0541	-1.8	0.346	0.814	2.01			0.459	-1.26	1.04	-1.15	-0.946	-0.945
-0.437	-0.881	0.564	-0.306	-1.75	0.311	0.831	2.18			0.5	-1.07	0.94	-1.32	-1.4	-0.914
0.16	-0.68	-0.425	-0.305	-0.835	0.803	0.554	1.71			0.435	-1.2	0.866	-1.53	-0.981	-1.08
-0.0675	-0.886	0.499	-0.487	-0.405	0.811	0.433	1.88			0.136	-1.33	1	-1.53	-1.07	-1.94
0.129	-0.037	0.772	-0.655	-0.971	0.0789	0.571	1.77			0.217	-1.02	0.986	-1.29	-0.794	-1.47
-0.0668	0.617	0.768	-0.888	-1.6	-0.678	0.599	1.03			0.237	-1.78	0.742	-1.02	-0.958	-1.2
0.0937	0.113	0.0396	-0.849	-1.78	-0.461	0.638	1.66			0.277	-1.63	0.668	-1.24	-0.655	-1.34
-0.417	0.459	-0.25	-0.991	-1.53	0.0768	0.826	1.76			0.267	-1.97	0.983	-1.45	-1.11	-1.23
-0.0871	0.305	0.469	-1.05	-1.3	0.293	0.487	1.36			0.267	-0.852	0.862	-1.22	-1.14	-1.3
0.223	0.0265	-0.192	-1.4	-1.43	0.445	0.258	1.5			0.434	-1.17	0.827	-1.06	-0.916	-0.919
-0.0224	0.503	0.603	-0.831	-1.45	0.752	0.895	1.57			0.581	-1.51	0.798	-1.23	-1.01	-1.39
-0.244	0.45	0.637	-0.755	-1.79	0.644	0.994	1.41			0.424	-1.47	1.02	-1.54	-1.16	-1.61
-0.308	0.0977	0.0835	-0.905	-2.04	0.165	0.37	1.56			0.499	-0.946	0.857	-1.2	-0.741	-1.26
-0.0416	-0.221	0.814	-1	-1.19	-0.321	0.173	1.51			0.514	-1.3	0.923	-1.16	-1.17	-1.15
-0.209	-0.165	-0.146	-1.07	-0.784	0.15	0.658	1.33			0.542	-1.13	0.712	-1.33	-0.884	-1.64
0.0712	-0.396	-0.646	-0.644	-1.31	0.823	1.22	1.2			0.548	-1.66	0.972	-1.16	-0.835	-1.28
-0.201	0.0161	-0.179	-0.844	-1.43	0.642	1.21	0.892			0.59	-1.12	0.953	-0.998	-1.18	-1.84
-0.385	0.229	-1.15	-1.09	-1.06	0.0258	0.752	0.968			0.571	-1.63	0.951	-1.07	-0.935	-1.74
0.215	-0.57	-0.0243	-0.451	-0.956	0.0726	0.416	0.851			0.4	-1.4	1.04	-0.942	-1.08	-1.53
-0.498	-0.332	-0.334	-0.867	-1.08	0.358	0.64	0.781			0.291	-1.08	0.882	-1.02	-1.27	-1.87
-0.53	-0.363	0.0935	-0.73	-0.989	0.129	0.95	0.899			0.503	-1.31	1.18	-1.21	-0.79	-1.54
0.131	-0.827	0.182	-0.723	-0.812	-0.596	1.32	0.409			0.445	-1.69	0.923	-1.29	-0.701	-1.13
-0.556	-0.393	0.504	-0.577	-1.32	-0.697	1.53	0.839			0.483	-1.56	0.873	-1.18	-0.193	-1.34
-0.571	-0.328	-0.499	-0.808	-1.74	-0.274	0.782	0.165			0.449	-1.89	1.03	-1.02	-0.689	-0.941
0.0509	-0.297	0.211	-0.81	-1.76	-0.227	0.156	0.254			0.396	-1.63	0.565	-1.07	-0.509	-1.37
-0.575	0.0939	-0.642	-0.678	-2.07	-0.103	0.514	0.428			0.371	-1.05	0.933	-1.04	-0.511	-1.59
0.157	0.957	0.309	-0.659	-1.9	0.266	0.862	0.665			0.536	-1.22	0.601	-1.12	-0.561	-1.11
-0.114	0.95	-0.102	-0.4	-1.61	0.347	0.984	0.598			0.631	-0.788	0.603	-1.02	-0.712	-0.687
-0.31	1.33	1.04	-0.283	-1.69	0.191	1.12	0.577			0.661	-1.04	0.256	-1.09	-0.837	-1.31
0.041	0.288	0.103	-0.995	-1.52	0.203	1.27	0.739			0.513	-1.15	0.321	-1.07	-0.935	-1.04
-0.153	1.02	0.129	-0.72	-0.93	0.346	1.25	0.233			0.435	-1.16	0.572	-1.1	-0.307	-1.54
-0.201	0.805	1.15	-0.496	-1.24	-0.0504	1.31	0.633			0.55	-0.942	0.423	-1.1	-0.11	-1.3
-0.716	1.91	0.349	-0.568	-2.08	-0.334	0.872	0.166			0.571	-0.189	0.658	-1.14	-0.582	-0.856
-0.631	2.53	0.259	-0.694	-2.29	-0.0557	0.81	0.674			0.455	-0.289	0.366	-1.14	-0.725	-1.12
0.0233	2.17	-0.591	-0.365	-2.13	0.185	1.01	0.442			0.423	-0.294	0.632	-0.918	-0.806	-0.916
-0.247	2.63	-0.582	-0.392	-2.15	-0.0295	0.399	0.5			0.45	-0.776	0.685	-0.664	-0.818	-1.26
0.041	1.79	1.44	-0.679	-2.16	-0.147	0.336	0.241			0.475	-0.625	0.607	-0.535	-1.22	-1.35
-0.121	1.44	0.745	-0.803	-1.8	-0.0316	0.878	-0.127			0.186	-0.717	0.687	-0.412	-0.598	-0.484
-0.284	1.33	0.242	-0.092	-1.26	0.324	0.979	0.203			0.288	-0.56	0.683	-0.453	-0.0645	-1.36
-0.0768	0.887	0.132	-1.23	-0.984	0.239	0.587	-0.0667			0.137	-1.22	0.595	-0.457	-0.653	-0.817
-0.0173	1.04	0.431	-0.657	-1.26	0.099	0.718	-0.484			0.196	-1.16	0.455	-0.508	-0.28	-0.875
-0.324	0.877	0.723	-0.945	-1.96	0.246	1.09	-0.42			0.17	-1.3	0.183	-0.347	-0.526	-0.623
-0.401	0.265	0.248	-0.916	-2.38	0.18	1.23	-0.583			0.00151	-1.56	0.0977	-0.331	-0.588	-0.858
-0.0871	0.341	-0.26	-1.04	-2.07	0.275	1.76	-0.351			0.00248	-1.3	0.135	-0.416	-0.299	-0.361
-0.402	0.391	0.792	-0.665	-1.72	0.585	1.6	-0.136			0.133	-1.45	0.407	-0.407	-0.218	0.0386
-0.354	-0.099	-0.869	-1	-1.6	-0.0482	1.3	-0.305			0.0968	-1.46	0.407	-0.434	0.129	-0.776
-0.418	0.386	-0.447	-0.848	-1.5	-0.352	1.85	-0.455			0.155	-1.45	0.305	-0.53	0.0898	-1.23
-0.578	0.0154	0.43	-0.702	-1.46	0.165	1.92	-0.223			0.109	-1.43	0.11	-0.565	0.0439	-0.83
-0.831	-0.309	-0.285	-0.942	-2.05	-0.0613	1.56	-0.354			0.22	-0.26	0.0639	-0.533	-0.169	-1.16
-0.388	-0.265	-0.382	-1.11	-2.32	0.00998	1.54	-0.342			0.152	-1.15	0.525	-0.529	0.236	-0.985
-0.469	0.609	-0.667	-0.935	-1.42	-0.0691	1.53	-0.15			0.153	-1.06	0.234	-0.679	-0.198	-0.818
-0.877	1.75	-1.08	-1.34	-0.478	-0.331	1.32	-0.291			0.233	-1.02	0.562	-0.729	-0.0574	-0.304
-0.682	1.48	0.00908	-1.2	-0.795	-0.166	1.19	-1.03			0.0638	-1.18	0.352	-0.795	0.228	-0.333
-0.328	1.43	-0.0692	-1.62	-1.67	0.0748	1.26	-1.05			-0.00923	-1.58	0.287	-0.639	-0.154	0.00556
-0.658	1.21	6.23e-05	-1.33	-1.67	-0.261	1.37	-0.588			0.0829	-1.07	0.253	-0.696	-0.0292	0.011
-1.02	0.813	-0.744	-1.31	-1.05	-0.332	1.42	-0.315			0.128	-1.24	0.376	-0.908	0.75	0.245
-0.72	0.944	-0.0279	-1.32	-1.26	0.202	1.47	0.00672			-0.0382	-1.49	0.414	-0.818	0.0612	-0.0316
-0.479	1.74	-0.298	-1.37	-1.59	-0.197	1.61	-0.387			-0.046	-1.75	0.532	-0.731	-0.52	0.609
-0.339	1.73	-1.27	-0.976	-1.8	-0.451	1.51	-0.411			-0.138	-1.46	0.43	-0.596	-0.00283	0.455
-0.548	2.37	-1.51	-1.36	-1.95	0.0378	1.15	-0.621			-0.168	-1.23	0.445	-0.769	-0.711	0.999
-0.794	2.32	-0.674	-1.07	-1.7	0.184	1.06	-0.215			-0.0242	-0.444	0.505	-0.791	-0.329	0.555
-0.65	1.73	0.295	-1.1	-1.25	-0.0462	1.37	-0.179			-0.04	-0.831	0.58	-0.677	-0.345	0.179
-0.809	2.12	0.0786	-1.41	-1.32	0.401	1.71	-0.125			-0.0949	-0.393	0.644	-0.872	-0.854	0.318
-0.772	1.69	-0.087	-1.3	-2	0.872	1.38	-1.24			-0.0773	-0.706	0.668	-1.02	-0.488	0.0653
-0.763	1.58	-1.05	-1.64	-2.2	0.225	1.34	-0.539			0.109	-0.726	0.75	-1.17	-0.226	0.0406
-0.641	1.4	-0.136	-1.81	-1.63	-0.502	1.72	-0.7			-0.00547	-1.05	0.533	-1.07	-1.09	0.5
-0.418	1.07	-0.3	-1.17	-1.66	0.155	1.57	-0.383			0.216	-1.11	0.7	-0.87	-0.798	0.0359
-0.246	1.11	-0.799	-1.27	-1.96	1.44	0.932	-0.373			0.155	-0.808	0.61	-1.03	-0.414	-0.366
-0.641	1.56	-0.205	-0.974	-1.23	1.56	0.161	-0.0584			0.105	-0.789	0.675	-1.13	-0.459	-0.495
-1.3	1.46	-1.37	-1.26	-1.05	1.24	0.0744	-0.694			0.00962	-1.07	0.787	-1.01	-0.653	-0.839
-0.832	1.31	-0.126	-0.83	-1.86	1.31	0.58	-0.428			0.184	-1.01	0.737	-0.901	-0.574	-0.635
-0.564	1.49	-0.463	-1.33	-1.83	1.74	1.42	-0.734			0.0328	-1.05	0.756	-0.972	-0.439	-0.131
-0.753	1.63	-0.194	-1.85	-1.37	2.04	2.18	-1.52			0.0823	-1.27	0.603	-0.649	-0.485	-0.462
-0.601	1.12	0.00279	-1.6	-1.82	2.29	2.27	-1.16			0.186	-1.26	0.386	-0.822	-0.97	-0.574
-0.447	0.915	0.417	-1.22	-1.38	2.48	1.66	-1.33			0.129	-0.764	0.593	-0.943	-0.716	-0.829
-1.38	0.994	-0.0124	-1.22	-0.192	2.33	1.76	-1.44			0.192	-1.21	0.389	-1.11	-0.825	-0.715
-1.12	1.02	-1.38	-1.21	-0.767	2.47	2.13	-1.09			0.154	-1.68	0.669	-1.07	-0.407	-0.784
-0.763	1.15	0.424	-1.16	-1.65	2.15	2.02	-0.687			0.178	-2.07	0.652	-0.716	-0.505	-0.447
-0.615	1.02	-0.145	-1.4	-1.26	1.56	1.5	-0.554			0.275	-1.69	0.489	-0.595	-0.753	-0.874
-0.711	0.174	-0.0897	-1.59	-0.933	1.76	1.06	-0.589			0.238	-1.99	0.607	-0.513	-0.55	-0.864
-1	-0.0648	-0.728	-1.43	-1.54	2.3	1.05	-1.05			0.185	-1.79	0.411	-0.579	-0.383	-0.382
-0.466	0.267	-0.781	-1.36	-1.97	2.04	1	-0.479			0.212	-1.32	0.533	-0.579	-0.679	-0.538
-0.464	0.0961	-1.09	-1.25	-1.52	1.22	1.01	-0.765			0.103	-1.5	0.485	-0.593	-0.712	-0.765
-0.438	-0.11	-0.211	-0.827	-1.03	0.769	0.935	-0.734			0.00338	-2.02	0.143	-0.576	-0.839	-0.318
-0.648	-0.247	-0.764	-1.51	-0.834	1.07	0.469	-0.987			0.095	-1.63	0.485	-0.712	-0.0552	-0.0805
-0.502	-0.236	-0.295	-1.41	-0.522	1.93	-0.123	-1			-0.0612	-1.56	0.565	-0.924	-0.148	0.0339
-0.352	0.75	-0.347	-1.43	-0.622	2.89	-0.0585	-1.24			0.046	-1.64	0.405	-0.946	-0.322	-0.196
-1.15	0.953	-1.27	-1.46	-1.04	2.82	0.669	-0.518			0.114	-1.58	0.595	-1.06	-0.824	0.464
-0.75	1.13	-0.467	-1.23	-1.24	2.21	1.37	-0.62			-0.00156	-1.46	0.417	-1.18	-0.449	0.332
-0.427	0.757	-0.303	-1.17	-1.11	1.65	0.931	-1.02			0.0535	-0.99	0.38	-1.14	0.0484	0.121
-0.359	0.658	-0.112	-1.43	-0.84	1.25	0.377	-0.986			0.123	-0.638	0.342	-1.02	-0.375	0.222
-0.91	1.02	-1.26	-1.51	-0.977	1.59	0.65	-0.792			-0.0495	-0.532	0.414	-1.31	-0.617	0.367
-0.632	1.09	-0.324	-1.34	-1.21	1.77	1.05	-1.11			0.0185	-1.07	0.609	-1.36	-0.567	0.0351
-0.732	0.787	-1.34	-1.28	-1.46	1.49	1.18	-0.901			0.0356	-0.712	0.532	-1.13	-0.267	-0.164
-1.06	-0.146	0.153	-1.08	-1.4	1.56	1.01	-1.33			0.0948	-1.14	0.379	-0.865	-0.607	-0.358
-0.822	0.425	-0.595	-1.66	-1.13	1.54	0.53	-0.721			0.117	-1.31	0.448	-0.914	-0.615	0.251
-0.613	0.572	0.154	-1.78	-1.55	1.15	-0.0292	-0.962			0.115	-1.82	0.54	-0.983	-0.75	0.156
-1.13	0.64	-0.742	-1.78	-2	1.15	-0.0425	-1.24			0.192	-0.877	0.479	-0.684	-0.327	-0.356
-1.01	1.72	0.895	-1.85	-1.52	1.23	0.28	-1.39			0.187	-0.48	0.843	-0.479	-0.475	0.00412
-0.501	0.872	1.19	-1.69	-1.37	1.74	0.43	-1.01			0.275	-1.28	0.875	-0.288	-0.372	-0.0131
-0.708	0.746	0.509	-1.83	-1.55	1.89	0.241	-1.15			0.16	-0.73	0.697	-0.243	-0.928	0.305
-0.853	1.02	0.371	-1.96	-1.11	1.28	-0.135	-1.26			0.0014	-1.08	0.711	-0.236	-0.524	0.174
-0.574	0.736	0.743	-1.53	-1.45	1.02	0.173	-1.42			0.163	-1.19	0.488	-0.383	-0.476	0.42
-0.685	0.696	0.067	-1.44	-1.34	1.76	0.74	-1.64			0.0903	-1.35	0.968	-0.597	-0.267	0.14
-0.726	0.557	0.749	-1.63	-0.998	1.72	0.154	-1.75			0.242	-1.74	0.849	-0.717	-0.434	0.0343
-0.903	0.619	-0.15	-1.47	-1.85	0.773	-0.27	-1.2			0.117	-1.14	1.02	-0.868	-0.372	0.225
-0.828	0.388	0.859	-1.44	-1.88	0.198	0.577	-1.23			0.0841	-1.64	0.723	-1.02	-0.00616	-0.044
-0.928	0.818	0.718	-1.25	-0.749	0.327	1.19	-1.36			-0.126	-1.46	1.14	-1.12	-0.243	-0.187
-0.918	0.549	0.348	-1.25	-0.415	0.638	0.616	-1.21			0.12	-1.62	1.15	-1.22	-0.401	-0.471
-0.493	0.461	-0.395	-1.61	-0.717	0.949	0.245	-1.67			0.158	-1.12	1.09	-1.17	0.095	-0.302
-0.971	0.0202	0.0222	-1.68	-0.912	0.318	0.908	-1.45			0.439	-1.73	1.19	-1.07	0.00438	-0.974
-1.05	0.0823	0.648	-1.61	-0.8	-0.141	0.941	-1.61			0.503	-1.73	0.772	-1.21	-0.34	-0.718
-0.688	-0.394	0.467	-1.52	-0.948	0.369	0.239	-1.57			0.529	-1.36	0.96	-1.16	-0.197	-1.25
-1.13	-0.235	0.846	-1.58	-1.32	0.956	0.0756	-0.861			0.418	-1.94	0.712	-0.974	-0.0947	-0.696
-1.02	-0.934	-0.226	-1.55	-1.32	1.03	0.736	-1.22			0.227	-1.42	1.24	-1.06	-0.0912	-1.14
-0.936	-1	0.744	-1.54	-1.03	0.392	1.06	-1.16			0.321	-1.76	1.21	-1.14	-0.262	-1.07
-0.835	-0.691	0.334	-1.29	-0.868	-0.0822	0.783	-1.1			0.429	-1.84	1.31	-0.998	-0.256	-0.772
-1.46	-0.468	0.599	-1.47	-1.09	-0.0138	0.428	-0.651			0.229	-1.77	0.846	-0.879	-0.133	-0.668
-1.49	0.337	0.361	-1.03	-1.24	0.268	0.057	-0.87			0.127	-1.2	1.24	-1.03	-0.168	-0.817
-1.48	0.413	-0.926	-1.3	-0.976	0.284	0.057	-1.26			0.138	-0.949	1.05	-1.2	-0.406	-1.08
-0.877	0.484	-0.509	-1.36	-1.1	0.857	0.326	-0.975			-0.0446	-1.39	1.37	-1.33	-0.333	-0.979
-0.869	0.242	0.576	-1.13	-1.46	0.5	0.299	-0.824			0.0423	-1.9	1.06	-1.18	-0.377	-0.448
-0.837	0.635	0.92	-1.29	-1.11	-0.533	0.0708	-0.593			-0.00144	-1.93	1.31	-1.24	-0.208	-0.568
-0.917	0.898	0.314	-1.5	-1.05	-0.458	0.106	-0.344			-0.0515	-1.97	1.35	-1.17	-0.448	-0.751
-0.693	0.174	-0.374	-1.57	-1.84	-0.0177	0.304	-0.482			-0.103	-2.09	1.19	-1.36	-1.07	-0.159
-1.03	0.335	-0.331	-1.66	-1.84	-0.0728	0.342	-0.565			-0.245	-1.72	1.02	-1.42	0.028	0.214
-1.27	0.775	-0.633	-1.69	-1.18	0.105	0.296	-0.89			-0.125	-1.58	1.11	-1.28	0.136	0.57
-1	-0.0593	-0.366	-1.96	-0.755	0.308	-0.135	-0.817			-0.105	-1.67	1.22	-1.14	0.578	0.144
-0.562	1.03	-0.337	-1.91	-0.573	-0.014	-0.718	-0.959			-0.112	-1.76	1.35	-1.18	-0.176	0.03
-1.02	0.449	-0.447	-1.73	-0.83	-0.263	-0.344	-0.312			-0.118	-1.36	1.8	-1.35	0.0759	-0.135
-0.974	1.06	0.0478	-1.61	-1.5	-0.267	0.423	-0.291			-0.222	-1.54	1.68	-1.53	0.115	-0.0758
-1.03	1.53	0.329	-1.38	-1.81	-0.443	0.142	-0.465			-0.258	-1.91	1.72	-1.4	0.384	-0.0157
-1.04	0.703	-0.203	-1.7	-1.66	-0.554	-0.854	-0.5			-0.266	-1.38	1.76	-1.23	-0.806	-0.189
-1.17	0.918	-0.339	-1.68	-1.41	-0.149	-1.07	-0.364			-0.306	-2.07	2.06	-1.14	-0.0964	-0.468
-1.08	0.497	0.968	-1.65	-1.2	0.134	-0.466	-0.471			-0.192	-2.05	2.27	-1.18	-0.0869	-0.905
-0.849	1.37	-0.0918	-1.32	-0.965	-0.27	-0.802	-0.865			-0.219	-1.66	2.13	-1.1	0.228	-0.814
-0.339	0.887	0.105	-1.34	-1.1	-0.422	-1.61	-0.479			-0.219	-1.85	1.98	-1.17	0.0938	-0.15
-0.942	0.854	-0.146	-1.78	-1.43	0.158	-1.25	-0.782			-0.173	-1.32	2.1	-0.998	-0.484	-0.352
-1.2	0.41	0.52	-1.68	-0.969	0.707	-0.565	-0.587			-0.192	-1.3	2.34	-0.746	-0.296	-0.697
-0.984	0.263	-0.355	-1.41	-0.785	0.538	-0.698	-0.593			-0.391	-1.35	2.2	-0.611	-0.511	-0.783
-0.68	-0.124	-0.585	-0.974	-1.2	-0.368	-0.815	-0.928			-0.268	-1.61	1.75	-0.529	-0.503	-0.734
-0.948	-0.287	0.101	-0.995	-0.968	-0.59	-0.484	-0.00298			-0.473	-1.23	1.73	-0.4	-0.813	-0.433
-1.14	-0.159	0.285	-1.48	-1.11	-0.376	-0.696	0.00617			-0.409	-1.52	1.83	-0.51	-0.885	-0.758
-1.06	-0.577	0.792	-1.28	-1.81	-0.774	-0.974	-0.0733			-0.379	-1.46	1.76	-0.519	-0.648	-0.606
-1.16	0.0456	1.11	-1.42	-1.46	-0.763	-0.318	0.0313			-0.328	-0.837	1.8	-0.66	-0.648	-1.1
-0.676	-0.205	1.85	-1.7	-0.782	0.106	-0.0753	-0.287			-0.431	-1.13	1.72	-0.884	-0.499	-1.39
-0.615	-0.317	1.49	-0.917	-0.656	0.475	-0.424	-0.178			-0.304	-0.885	2.18	-0.908	-0.493	-0.826
-0.505	-0.311	0.253	-1.11	-0.923	0.418	-0.673	0.0272			-0.298	-0.54	1.67	-1	-0.526	-0.72
-0.638	-0.635	1.01	-0.896	-1.17	0.381	-0.686	-0.514			-0.354	-1.49	1.84	-1.21	-0.258	-1.32
-1.19	-0.53	0.762	-1.03	-0.947	0.587	-0.285	0.0106			-0.238	-1.03	2.09	-1.27	-0.0379	-1.15
-0.765	-0.444	0.385	-1.05	-1.45	1.16	0.266	-0.592			-0.237	-1.2	2.34	-1.26	-0.196	-0.575
-0.861	0.535	-0.162	-0.786	-1.63	0.866	0.143	-0.532			-0.373	-1.7	2.35	-0.927	-0.478	-1.03
-1.03	-0.49	0.0385	-0.29	-0.879	0.258	-0.447	-0.497			-0.311	-1.67	2.86	-0.867	-0.737	-0.556
-0.665	-0.0408	0.591	-0.517	-0.746	0.307	-0.885	0.401			-0.233	-1.66	2.41	-0.993	-0.904	-0.723
-0.697	-0.512	0.415	0.0103	-0.701	0.787	-0.795	0.562			-0.361	-1.28	2.52	-0.811	-0.541	-0.219
-0.626	-0.29	0.166	-0.96	-0.141	1.36	-0.745	-0.249			-0.297	-1.4	2.4	-0.91	-0.819	-0.156
-0.813	-0.27	-0.0155	-1.2	-0.189	1.15	-1.25	-0.5			-0.364	-1.73	2.5	-0.963	-0.781	-0.611
-0.833	-0.638	0.29	-0.842	-0.745	0.346	-1.83	0.0251			-0.274	-1.96	2.52	-0.821	-0.612	-0.049
-0.801	-0.542	-0.438	-1.1	-0.628	0.157	-1.24	0.0505			-0.287	-1.56	2.23	-0.909	-0.307	-0.241
-0.977	-0.598	-0.198	-1.2	-0.0888	0.543	-0.0928	-0.0689			-0.245	-1.66	2.15	-0.975	-0.446	0.29
-0.687	-0.0237	-0.461	-1.6	-0.0797	0.759	0.551	-0.195			-0.285	-1.75	2.08	-0.765	-0.592	0.189
-0.849	-1.23	-0.462	-1.14	-0.681	0.554	0.37	-0.425			-0.325	-1.06	2.25	-0.59	-0.14	0.138
-0.53	-1.06	-0.492	-0.878	-0.613	0.041	-0.0254	-0.214			-0.352	-1.26	2.3	-0.548	-0.0247	0.491
-0.76	-0.305	0.524	-1.49	-0.0507	0.198	-0.195	-0.636			-0.421	-1.09	2.31	-0.715	0.132	0.109
-0.899	-0.739	0.125	-1.75	-0.12	0.435	-0.118	-0.0818			-0.439	-1.72	2.33	-0.89	-0.68	-0.128
-0.848	-0.667	0.696	-1.42	-0.88	-0.0992	-0.167	0.0368			-0.53	-1.53	1.96	-0.692	-0.418	-0.0351
-0.584	-0.728	0.112	-1.32	-1.38	0.275	0.124	-0.297			-0.549	-1.22	2.07	-0.666	-0.411	0.0198
-1.23	-0.55	-0.458	-1.33	-0.624	0.834	-0.0317	-0.213			-0.531	-0.496	2.28	-0.829	-0.729	-0.219
-0.789	-1.13	0.308	-0.912	0.251	0.777	-0.808	-0.623			-0.438	-0.398	2.17	-0.836	-0.566	-0.2
-1.16	-0.598	-0.384	-0.82	-0.022	0.604	-0.838	-0.213			-0.563	-0.204	2.25	-0.957	-0.456	-0.304
-1.49	-0.85	-0.0134	-0.824	-0.763	0.729	-0.111	-0.386			-0.378	-0.773	2.42	-1.09	-0.138	0.332
-0.667	-0.855	0.318	-0.722	-0.771	0.483	-0.386	-0.024			-0.456	-0.339	2.2	-0.81	-0.244	0.395
-1.03	-0.636	-0.132	-0.949	-0.26	0.365	-0.847	0.0371			-0.483	-0.225	2.44	-0.605	-0.572	-0.0808
-1	-0.722	-0.224	-1.39	-0.211	0.703	-0.123	0.241			-0.406	-0.713	2.16	-0.763	-0.517	0.0813
-1.41	0.433	-0.0669	-1.11	-0.843	0.412	-0.00758	0.088			-0.346	-0.982	2.21	-1.04	-0.282	-0.0922
-1	0.0568	0.192	-0.872	-1.12	0.0201	-0.603	0.0237			-0.362	-1.09	2.42	-1.17	-0.651	0.0114
-1.24	0.212	1.26	-0.905	-0.763	0.242	-0.71	0.00958			-0.382	-1.19	2.32	-0.75	-0.501	-0.819
-0.673	0.746	0.307	-0.907	-0.958	0.0805	-0.163	0.176			-0.507	-1.14	2.13	-0.601	-0.48	-0.277
-1.06	1.04	0.539	-0.789	-1.3	-0.153	-0.199	0.0135			-0.317	-1	2.54	-0.43	-0.592	-0.659
-0.861	0.838	0.815	-0.541	-0.802	-0.0872	-0.898	0.103			-0.394	-0.379	2.05	-0.378	-0.901	-0.9
-1.11	0.548	0.365	-0.26	-0.551	-0.112	-1.04	0.874			-0.387	-0.758	1.97	-0.591	-0.561	-1.23
-1.02	0.675	0.635	0.0649	-1.03	0.121	-0.306	0.247			-0.386	-0.716	2.25	-0.622	-0.71	-0.853
-1.13	1.12	1.24	-0.635	-1.44	0.594	-0.3	0.708			-0.389	-0.92	2.08	-0.653	-0.594	-0.942
-0.986	0.57	0.307	-0.881	-1.5	0.581	-0.837	0.449			-0.433	-0.216	2.41	-0.753	-0.439	-1.26
-1.25	1.13	0.473	-0.407	-0.946	0.26	-0.419	0.704			-0.476	0.0478	2.01	-0.998	-0.29	-0.866
-0.92	0.727	0.764	-0.51	-0.154	0.133	0.424	0.0528			-0.374	-0.236	2.19	-1.01	-0.514	-1.2
-1.17	1.06	1.1	-0.405	-0.238	0.295	0.0129	-0.107			-0.446	-1.04	2.11	-0.998	-0.345	-0.958
-1.14	0.938	0.834	-0.783	-0.785	0.548	-0.223	-0.213			-0.426	-0.528	2.17	-1.2	-0.125	-1.44
-1.21	0.77	0.782	-0.668	-0.945	0.0135	0.446	-0.254			-0.528	-0.599	1.99	-1.2	-0.128	-0.737
-1.26	1.41	0.287	-0.664	-0.767	-0.214	1.04	-0.294			-0.381	-0.801	2.36	-0.954	0.478	-1.47
-1.25	0.481	0.216	-1.15	-1.14	0.272	1.43	-0.224			-0.468	-0.841	2.49	-0.783	0.266	-0.869
-1.31	0.477	0.255	-1.04	-1.23	0.538	1.38	-0.507			-0.154	-1.13	2.33	-0.604	0.35	-1.08
-0.994	0.804	1.68	-1	-0.189	-0.0454	0.979	0.0443			-0.245	-0.889	1.94	-0.472	0.153	-1.11
-1.26	0.52	0.107	-0.498	0.272	-0.591	0.756	0.255			-0.183	-0.375	1.9	-0.64	-0.0471	-0.944
-1.16	0.268	-0.301	-0.372	-0.33	-0.0182	0.761	-0.483			-0.187	-0.599	2.53	-0.745	-0.199	-0.621
-1.24	-0.0843	0.652	-0.176	-0.705	0.737	0.93	0.258			-0.239	-0.729	2.28	-0.829	-0.333	-1.22
-1.41	-0.163	0.381	0.00636	-0.716	0.879	1.01	0.608			-0.201	-0.702	2.66	-0.951	0.107	-0.64
-1.1	0.293	0.0918	0.227	-0.69	0.575	0.827	0.318			-0.177	-0.704	2.78	-1.1	0.0663	-0.961
-0.697	0.395	0.317	0.000879	-0.216	0.276	0.587	0.109			-0.314	-0.113	3.03	-1.17	-0.351	-1.39
-1.43	-0.184	0.906	0.279	0.273	0.507	0.634	0.0839			-0.384	-0.471	2.88	-1.15	-0.491	-1.23
-0.88	0.267	0.202	0.0269	0.428	0.499	0.815	0.165			-0.251	-0.529	2.74	-1.23	0.104	-1.04
-0.701	0.329	0.0968	0.294	0.194	0.118	0.789	-0.0146			-0.383	-1.5	2.63	-0.979	0.209	-0.638
-0.907	0.346	0.68	-0.0631	-0.0846	0.187	0.724	0.212			-0.289	-1.18	2.55	-1.05	0.417	-0.936
-0.626	0.264	0.174	-0.804	-0.0406	0.891	0.836	-0.0738			-0.279	-0.253	2.42	-1.28	0.389	-1.06
-0.394	-0.198	-0.0819	-0.531	-0.0121	1.27	0.72	0.191			-0.39	-0.576	2.62	-1.62	0.0229	-1.27
-0.636	-0.0291	0.309	-0.372	-0.292	1.5	0.258	-0.0625			-0.263	-0.913	2.39	-1.54	0.0489	-0.911
-0.491	-0.134	-0.251	-0.289	-0.506	2.03	0.142	-0.0927			-0.351	-0.403	2.47	-1.26	0.226	-1.44
-0.815	-0.622	0.0291	-0.715	-0.494	1.82	0.803	0.106			-0.342	-1.09	2.41	-1.15	-0.0774	-1.49
-0.295	-0.668	0.373	-0.961	-0.123	1.16	0.812	-0.324			-0.34	-1.08	2.38	-1.31	0.198	-1.46
-0.761	-0.463	1.39	-0.962	0.32	0.75	-0.12	-0.753			-0.314	-1.29	2.48	-1.66	0.203	-1.41
-0.799	-0.578	1.02	-0.881	-0.244	0.768	0.699	-0.42			-0.341	-0.986	2.49	-1.58	-0.205	-1.6
-0.463	0.066	0.899	-0.814	-0.797	0.903	1.63	-0.36			-0.126	-0.889	2.45	-1.41	-0.571	-1.69
-0.48	0.347	0.896	-0.413	-0.395	0.442	0.621	-0.546			-0.22	-1.33	2.3	-1.12	-0.275	-1.72
-1.12	-0.0277	0.505	-1.1	-0.216	-0.183	0.102	-0.216			-0.263	-1.45	2.5	-1.1	-0.131	-1.74
-0.849	-0.302	1.22	-0.403	-0.799	-0.159	0.93	-0.0398			-0.271	-1.06	2.48	-1.51	-0.444	-1.4
-1.05	-0.709	0.562	-0.167	-1.06	0.695	1.47	-0.638			-0.232	-1.25	2.5	-1.38	-0.643	-1.36
-0.853	-0.987	0.247	-0.19	-0.528	0.947	1.05	-0.399			-0.134	-0.938	2.68	-1.28	-0.512	-1.35
-1.04	-1.32	-0.0164	-0.52	-0.243	0.276	0.189	-0.756			-0.315	-0.749	2.6	-1.02	-0.497	-0.866
-1.09	-1.38	1.02	-0.788	-0.455	0.324	0.0523	-1.06			-0.292	-0.986	2.43	-1.13	-0.178	-0.868
-0.578	-1.41	0.966	-0.555	-0.807	0.678	0.961	-0.902			-0.157	-1.46	2.48	-1.3	-0.329	-1.09
-0.851	-1.44	0.276	0.0853	-1.06	0.614	1.26	-1.07			-0.304	-1.08	2.58	-1.19	-0.308	-1.1
-0.908	-0.97	0.307	0.00525	-0.967	0.687	0.707	-0.862			-0.161	-1.3	2.58	-1.41	-0.47	-1.34
-0.844	-1.42	-0.324	-0.122	-0.568	0.64	0.281	-1.02			-0.183	-1.29	2.58	-1.58	-0.565	-0.654
-1.3	-1.3	-0.419	-0.0906	-0.966	0.67	0.236	-0.869			-0.295	-1.14	2.51	-1.29	-0.0622	-0.75
-0.698	-1.1	-0.162	-0.471	-0.969	1.16	0.333	-0.926			-0.105	-1.38	2.57	-1.01	-0.174	-0.779
-1.36	-1.24	0.362	-0.421	0.0769	1.21	0.912	-1.38			-0.118	-1.05	2.48	-0.886	-0.295	-0.666
-0.831	-1.67	-0.286	-0.117	0.104	0.923	1.34	-1.42			-0.233	-1.68	2.32	-1.05	-0.329	-0.791
-1.33	-1.13	-0.279	-0.116	-0.708	0.618	1.01	-1.28			-0.318	-1.98	2.39	-1.11	-0.127	-0.313
-0.898	-1.7	-0.687	0.405	-0.888	0.178	0.603	-1.07			-0.349	-1.74	2.87	-0.887	-0.594	-0.349
-0.924	-1.32	-0.591	-0.0332	-0.634	0.35	0.381	-1.1			-0.411	-1.4	2.69	-0.977	-0.783	-0.726
-1.08	-0.858	-1.34	0.409	-0.992	0.862	0.337	-0.586			-0.413	-1.11	2.44	-1.17	-0.76	-0.604
-0.529	-0.656	-1.21	0.762	-1.13	1.21	0.355	-0.907			-0.34	-1.2	2.88	-1.25	-0.356	-0.715
-0.46	-0.924	-0.895	0.621	-0.566	1.22	0.144	-1.17			-0.369	-1.29	2.79	-1.3	-0.131	-0.606
-0.971	-1.04	-0.84	0.0743	-0.603	1.14	0.293	-0.778			-0.338	-1.15	2.73	-1.4	-0.357	-0.594
-0.521	-1.04	-0.908	0.234	-1.13	1.31	0.551	-1.12			-0.345	-1.32	2.64	-1.29	-0.36	-0.556
-0.408	-0.189	-0.654	-0.282	-1.1	1.44	0.508	-0.81			-0.379	-1.41	2.61	-1.2	-0.756	-0.399
-0.59	-0.317	-0.669	0.167	-0.665	1.47	0.248	-1.12			-0.176	-1.11	2.7	-1.47	-0.762	-0.175
-1.08	-0.839	-0.688	-0.846	-0.017	1.72	0.112	-0.9			-0.165	-1.07	2.5	-1.69	-0.751	-0.446
-1.28	-0.477	0.628	-0.263	0.259	1.63	0.465	-1.57			-0.22	-0.438	2.5	-1.61	-0.0751	-0.061
-0.553	-0.601	-0.467	-0.502	-0.202	1.07	0.418	-1.04			-0.179	-0.832	2.46	-1.58	-0.626	0.0657
-0.79	-0.788	-0.503	-0.741	-0.3	0.866	-0.477	-0.968			-0.161	-1.34	2.38	-1.73	-0.341	-0.38
-0.772	-0.532	-0.666	-0.886	0.0884	1.19	-0.654	-0.583			-0.0475	-1.38	2.29	-1.74	-0.364	0.308
-0.636	-0.561	-0.503	-0.291	-0.0192	1.05	0.312	-0.733			0.201	-1.65	2.21	-1.89	-0.496	-0.438
-0.86	-0.81	-0.418	-0.49	-0.729	0.691	0.327	-0.605			0.154	-1.29	2.03	-1.89	-0.551	-0.457
-0.801	-0.784	-0.75	-0.486	-0.909	0.747	-0.522	-0.697			0.368	-1.2	2.36	-2.07	-0.599	0.336
-0.734	-0.943	0.104	-0.761	-0.201	0.34	-0.198	-1.09			0.173	-1.25	2.16	-2.06	-0.85	0.0212
0.107	-0.767	-1.01	-0.428	0.00674	0.197	0.345	-0.461			0.13	-0.866	2.07	-1.75	-0.862	-0.216
-0.537	-0.843	-0.365	-0.494	-0.789	0.352	-0.043	-1.12			0.43	-0.885	2.09	-1.53	-0.47	0.153
-1.17	-1.08	0.272	-0.674	-0.678	0.302	-0.317	-1.37			0.597	-1.07	1.97	-1.38	-0.552	-0.0426
-1.23	-1.54	0.964	-0.55	0.517	0.288	0.0621	-1.14			0.738	-1.1	2.11	-1.68	-0.4	-0.623
-1.11	-0.808	0.328	-0.9	0.339	0.374	-0.0176	-1.26			0.759	-1.1	2.4	-1.42	-0.447	-0.0312
-0.698	-0.638	0.299	-0.739	-0.694	0.459	-0.833	-1.13			0.635	-1.34	2.65	-1.66	-0.177	-0.491
-0.713	0.304	0.652	-0.692	-1.03	0.868	-0.635	-0.759			0.671	-0.853	2.63	-1.75	-0.188	0.0232
-0.843	0.381	-0.137	-0.59	-0.98	1.18	-0.0838	-1.06			0.555	-1.83	2.87	-1.87	-0.577	-0.33
-0.401	-0.67	-0.0653	-0.922	-0.779	0.662	-0.236	-1.04			0.406	-0.937	2.68	-1.68	-0.236	-0.35
-0.462	-0.781	0.38	-1.4	-0.565	0.277	-0.262	-1.33			0.394	-1.03	2.6	-1.85	-0.327	-0.0496
-0.0952	-0.125	0.145	-0.701	-0.274	0.562	0.542	-0.955			0.381	-1.39	2.65	-1.6	-0.25	-0.0859
-0.271	0.332	0.792	-0.398	0.0611	0.536	1.02	-1.45			0.352	-1.25	2.79	-1.38	-0.84	-0.000903
-0.649	-0.225	-0.33	-0.831	-0.524	0.793	0.583	-1.44			0.247	-1.7	2.77	-1.64	-0.0581	0.216
-0.712	0.177	-0.174	-0.697	-0.904	1.16	-0.135	-1.48			0.264	-0.87	2.56	-1.29	-0.124	-0.0191
-0.151	0.264	0.233	-0.688	-0.906	0.696	-0.141	-1.35			0.299	-1.23	2.68	-1.09	0.301	0.349
-0.419	-0.48	0.0897	-0.838	-0.697	0.203	0.25	-1.25			0.0822	-1.36	2.67	-0.935	0.0742	0.282
-0.73	0.0183	0.409	-0.391	-0.222	0.144	0.605	-1.26			0.143	-1.47	2.68	-0.946	-0.175	-0.315
-0.755	0.0326	0.0466	0.051	-0.297	0.377	0.826	-1.34			0.278	-1.06	2.53	-0.881	0.174	-0.386
-0.763	-0.519	0.407	0.0788	-0.695	0.432	0.0603	-1.57			0.308	-1.69	2.61	-0.887	0.192	-0.427
-1.28	-0.137	0.595	0.108	-0.928	0.671	-0.737	-1.46			0.288	-1.47	2.67	-0.778	0.541	-0.4
-0.669	-0.014	0.0808	0.903	-1.04	0.711	-0.425	-1.51			0.229	-1.54	2.22	-0.682	0.255	-0.678
-0.866	0.12	-0.115	0.719	-0.627	0.26	-0.13	-1.53			0.133	-1.14	2.49	-0.688	-0.0294	-0.475
-1.04	0.411	0.85	0.558	-0.571	-0.458	-0.857	-1.05			0.169	-1.19	2.42	-0.69	0.0327	-0.29
-1.12	0.15	-0.324	0.626	-1.05	-0.154	-1.08	-1.33			0.305	-1.93	1.73	-0.803	0.217	0.437
-1.06	0.295	-0.0909	0.124	-1.2	0.497	-0.431	-1.47			0.2	-1.83	2.25	-0.96	0.0132	-0.144
-0.92	0.294	-0.219	-0.109	-1.23	0.726	-0.251	-1.23			0.205	-1.07	2	-1.15	-0.0916	0.12
-0.541	-0.036	-0.0612	-0.339	-1.03	0.782	-0.64	-1.16			0.399	-1.44	1.93	-1.35	0.0988	0.0967
-0.627	-0.596	-0.493	-0.394	-0.293	0.748	-0.87	-1.13			0.458	-1.47	1.6	-1.49	0.36	0.306
-0.455	-0.506	0.107	-0.164	-0.191	0.616	-0.536	-1.11			0.541	-1.47	1.75	-1.68	-0.235	0.311
-0.827	0.151	0.508	-0.404	-0.298	0.416	-0.0313	-1			0.447	-1.77	1.77	-1.73	-0.687	0.322
-0.949	-0.217	-0.772	-0.172	-0.302	0.234	-0.0649	-1.39			0.471	-2.23	1.7	-1.76	-0.568	0.327
-0.7	-0.127	-0.671	0.121	-0.496	0.306	-0.323	-1.17			0.282	-1.93	1.69	-1.62	-0.426	0.191
-0.992	0.0586	-0.385	-0.219	-0.847	0.717	-0.167	-0.884			0.333	-1.66	1.47	-1.32	-0.363	0.195
-0.381	-0.0102	0.473	-0.679	-1.13	0.931	-0.293	-1.11			0.312	-1.75	1.6	-1.35	-0.422	0.619
-0.261	0.91	0.216	-0.623	-0.693	0.343	-0.749	-1.21			0.308	-2.17	1.44	-1.42	-0.1	0.581
-0.38	0.408	0.0828	-0.614	-0.186	0.0162	-0.719	-1.1			0.186	-2.07	1.42	-1.3	-0.0323	0.759
-0.63	0.337	-0.289	-0.666	-0.527	0.335	-0.821	-1.45			0.129	-2.16	1.17	-1.12	-0.034	0.865
-0.396	0.56	-0.66	-0.715	-0.764	0.52	-0.952	-1.32			0.029	-2.17	1.13	-0.914	0.33	0.569
-0.767	0.222	-0.453	-0.36	-0.658	0.746	-0.647	-1.11			0.0699	-1.62	1.48	-0.711	0.243	1.17
-0.389	0.437	-0.236	-0.934	-0.922	0.887	-0.242	-1.14			0.0104	-1.77	1.12	-0.719	0.00278	0.795
-0.895	1.19	0.309	-0.645	-0.877	0.572	-0.0868	-1.23			-0.14	-1.68	1.37	-0.967	-0.383	1.11
-0.483	1.47	-0.319	-1.07	-0.559	-0.0364	-0.571	-0.712			0.0756	-0.981	1.09	-1.3	-0.383	1.23
-0.787	2.48	-0.876	-0.604	-0.169	-0.561	-1.13	-0.979			0.141	-1.01	1.14	-1.11	-0.181	0.836
-0.524	2.75	-0.887	-0.339	-0.106	-0.694	-1.15	-0.795			0.0685	-1.8	1.29	-0.963	-0.106	0.904
-1.05	2	-0.951	-0.00635	-0.179	0.237	-0.751	-1			0.192	-1.56	1.16	-0.971	0.154	1.41
-0.843	2.13	-0.241	-0.265	-0.448	0.892	-0.777	-1.22			0.265	-1.5	0.787	-0.979	0.842	1.24
-0.671	1.97	0.139	-0.291	-1.14	-0.112	-1.22	-1.72			0.144	-1.1	0.823	-0.904	0.0575	0.659
-0.978	1.67	-1.03	-0.512	-1.53	-0.777	-0.912	-1.12			0.144	-0.701	0.902	-0.956	0.309	0.994
-1.18	1.45	-0.84	-0.492	-1.12	-0.128	-0.389	-1.06			0.285	-1.4	1.02	-0.832	0.335	0.701
-0.865	1.41	-0.0209	-0.755	-0.411	0.0587	-0.782	-0.908			0.334	-0.943	0.9	-0.775	0.173	1.2
-0.762	2.41	0.43	-0.301	-0.158	-0.705	-0.989	-1.12			0.343	-1.34	0.901	-0.706	0.315	1.31
-1.41	2.04	-0.0882	-0.561	-0.308	-0.612	-0.615	-0.753			0.107	-1.13	1.2	-0.694	-0.079	1.38
-1.25	2.25	0.417	-0.0927	-0.9	0.132	-0.622	-1.05			0.259	-1.44	1.17	-0.718	-0.0713	0.631
-0.966	2.02	-0.519	0.123	-0.85	-0.105	-0.711	-1.1			0.166	-1.56	1.08	-0.664	-0.231	0.937
-0.962	1.38	-0.211	0.187	-0.0697	-0.299	-0.62	-1.39			0.153	-1.24	0.621	-0.759	-0.442	0.673
-0.615	1.32	-0.194	0.0296	-0.174	0.158	-0.921	-1.43			0.18	-0.828	0.71	-0.659	0.303	0.564
-1.06	0.694	0.122	0.313	-1.09	0.307	-1.1	-0.99			0.0831	-1.62	0.825	-0.598	-0.266	0.0859
-1.3	1.26	0.327	-0.082	-1.06	0.143	-0.72	-0.873			0.184	-1.57	0.941	-0.625	-0.0196	0.14
-0.997	1.41	-0.196	-0.246	-0.463	0.0747	-0.234	-1.05			0.00966	-2.04	0.978	-0.846	0.231	0.379
-1.54	1.2	-0.00618	-0.529	-0.162	0.182	-0.239	-1.15			0.0379	-2.23	1.06	-1.04	-0.24	0.423
-1.59	0.858	-0.786	-0.247	-0.307	-0.209	-0.792	-1.19			0.0464	-1.97	1.24	-1.14	0.184	0.796
-1.29	0.908	0.108	-0.196	-1.02	-0.167	-0.893	-1.25			0.0294	-1.19	1.24	-0.991	-0.107	0.554
-0.687	0.858	-0.489	-0.0827	-1.45	-0.0409	-0.438	-0.96			0.0538	-0.682	1.1	-0.952	0.0184	0.477
-1.24	0.699	0.00675	-0.705	-0.625	-0.278	-0.457	-0.7			0.134	-0.8	1.14	-0.813	0.255	0.364
-0.855	0.926	0.327	0.187	0.0145	-0.343	-1.21	-1.12			0.0627	-0.719	1.12	-0.672	0.364	0.425
-1.31	1.85	0.76	0.199	-0.186	-0.115	-1.57	-0.955			0.207	-0.455	0.913	-0.325	0.787	0.788
-1.36	1.32	-0.715	-0.095	-0.496	0.0612	-0.74	-1			0.14	0.176	1.14	-0.0639	0.276	0.784
-1.27	1.96	-0.713	0.0234	-0.845	-0.0898	0.176	-1			0.0693	-0.0496	0.761	-0.102	0.717	1.04
-1.32	2.25	-0.387	0.0725	-0.994	0.126	-0.322	-1.02			-0.0305	-0.184	1.34	-0.0748	0.754	1.09
-1.03	1.36	-0.681	-0.271	-0.754	0.95	-1.12	-0.673			-0.0425	-0.555	1.07	-0.0633	0.0221	1.06
-1.23	1.02	0.0212	-0.334	-0.669	0.955	-0.732	-1.1			-0.0807	-0.406	0.931	-0.158	-0.2	0.573
-1.11	0.784	-0.586	-0.586	-0.977	-0.0049	0.309	-0.904			-0.123	-0.255	0.758	-0.0372	0.0222	1.23
-0.982	0.935	0.152	-0.656	-1.55	-0.145	0.687	-0.81			-0.189	-0.0591	1.12	-0.0653	-0.372	0.509
-1.01	1.64	0.286	-1.03	-1.13	0.119	0.00413	-0.792			-0.204	0.434	1.03	-0.0379	-0.309	0.733
-1.6	0.695	0.593	-0.838	-0.0192	0.149	-0.94	-0.202			0.102	-0.34	1.48	-0.249	-0.776	1.09
-0.85	1.17	-0.346	-0.646	0.302	-0.324	-1.21	-0.391			0.153	-0.28	1.07	-0.292	-1.13	0.724
-0.86	0.853	-0.168	-1.04	0.458	-0.407	-1.02	-0.882			-0.0564	-0.314	1.6	-0.585	-0.831	0.967
-0.95	1.32	-0.197	-0.389	0.856	0.238	-0.852	-0.902			0.0541	-0.532	1.12	-0.868	-0.62	0.952
-1.44	1.42	0.82	-0.083	0.562	0.458	-0.862	-0.852			-0.0321	-0.588	1.38	-0.699	-1.02	0.505
-1.11	1.54	0.857	-0.465	-0.118	0.0209	-0.595	-1			-0.0361	-0.621	1.19	-0.495	-0.339	0.605
-0.951	2.71	0.238	-0.238	0.162	-0.206	-0.0254	-0.409			-0.106	-0.511	1.8	-0.421	-0.364	0.293
-0.846	2.85	2.08	0.306	0.246	-0.0639	0.279	-0.577			-0.0517	-1.29	2.34	-0.409	0.064	0.596
-0.883	2.88	0.942	0.247	-0.328	0.635	0.0759	-0.301			-0.144	-0.959	2.14	-0.53	-0.84	0.591
-0.805	2.58	0.751	0.0428	-0.678	0.474	0.107	-0.419			-0.199	-0.584	2.38	-0.749	-0.563	1.09
-1.13	2.24	0.604	-0.0817	-0.628	-0.583	0.454	-0.737			-0.12	-1.02	1.67	-0.972	-0.303	0.707
-1.06	2.3	1.09	-0.363	-0.294	-0.221	0.567	-0.779			-0.187	-1.26	1.69	-1.05	-0.637	1.17
-0.732	2.07	0.374	0.0176	0.0263	1.03	-0.277	-0.811			-0.231	-0.516	2.02	-0.957	-0.712	0.862
-1.79	2.59	0.668	0.078	-0.101	1.07	-0.733	-0.654			-0.272	-1.03	1.89	-1.08	-0.332	0.832
-0.908	2.77	0.243	-0.351	-0.345	0.357	-0.0832	-0.401			-0.174	-1.37	1.45	-1.04	-0.92	1.03
-1.26	2.35	0.389	-0.251	-0.284	0.149	0.248	-0.895			-0.161	-1.01	1.8	-0.934	-0.527	0.609
-1.21	1.98	1.07	-0.759	-0.335	0.645	-0.337	-0.477			-0.29	-1.24	1.77	-1.25	-0.839	0.792
-1	2.28	0.94	-0.433	-0.0681	1.08	-0.817	-0.698			-0.157	-1.53	1.61	-1.48	-0.621	0.493
-0.809	1.65	0.269	-0.645	0.321	1.33	-0.597	-0.63			-0.0337	-0.652	1.8	-1.15	-0.614	0.566
-0.985	1.86	0.117	0.132	0.136	1.2	-0.0664	-0.582			-0.147	-1	1.63	-0.899	-0.783	0.433
-0.952	1.56	0.335	-0.309	-0.426	0.269	-0.235	-1.04			-0.0829	-1.49	1.65	-0.599	-1.05	1.24
-1.06	1.34	-0.826	0.369	-0.8	0.305	-0.742	-0.596			0.0941	-1.74	2.05	-0.47	-0.686	0.625
-0.826	1.56	-0.0181	0.33	-0.671	1.11	-0.563	-0.792			-0.0245	-1.28	1.92	-0.645	-0.611	0.995
-0.942	1.96	0.103	0.432	-0.423	1.32	-0.288	-0.868			0.0685	-0.982	1.95	-0.373	-0.293	0.0768
-1.09	1.14	0.217	0.0688	-0.345	0.97	-0.354	-0.911			0.0683	-1.42	1.94	-0.219	-0.256	0.877
-1.43	1.8	0.326	-0.211	-0.521	0.635	-0.752	-0.729			0.122	-1.38	1.67	-0.226	-0.923	0.674
-1.1	2.14	0.413	0.207	-0.412	0.821	-0.903	-0.696			0.152	-1.27	2.03	-0.375	-0.913	0.0338
-1.09	1.57	-0.99	0.408	-0.198	1.04	-0.584	-0.838			0.206	-1.5	1.76	-0.54	-0.927	0.786
-1.08	1.7	-0.204	0.0952	-0.486	0.738	-0.328	-0.978			0.36	-1.01	1.54	-0.532	-0.892	0.469
-1.51	1.18	-0.0488	0.679	-0.0788	0.314	-0.242	-0.61			0.453	-1.25	1.49	-0.476	-1.2	0.973
-1.19	0.57	-0.555	0.445	0.0753	0.639	-0.221	-0.0716			0.342	-1.15	1.59	-0.687	-0.619	1.28
-1.35	0.928	-1.34	0.727	-0.573	1.31	-0.508	-0.169			0.283	-2.1	1.47	-0.746	-0.801	1.84
-1.19	0.442	-0.692	0.835	-0.927	1.14	-0.808	-0.349			0.227	-1.72	1.8	-0.513	-1.06	2.42
-1.01	1.25	-1.02	0.321	-0.372	0.449	-0.552	-0.72			0.207	-1.41	1.55	-0.508	-0.852	2.19
-1.14	1.07	-0.633	0.907	0.238	0.263	-0.0917	-0.528			0.0948	-1.94	1.46	-0.776	-0.31	2.27
-1.15	0.642	-1.08	0.559	-0.284	0.346	-0.0432	-0.731			0.16	-2.1	1.77	-1.05	-1.16	1.79
-0.936	0.478	-1.32	0.373	-0.868	0.413	-0.298	-0.744			0.185	-1.9	1.71	-1.14	-1.15	1.71
-0.907	0.474	-0.745	0.517	-0.51	0.553	-0.209	-0.701			0.0309	-1.48	1.65	-1.17	-1.04	1.83
-0.906	0.143	-1.74	0.177	-0.0235	0.439	0.0384	-0.891			-0.1	-1.97	1.53	-1.02	-0.822	1.5
-1.05	0.401	-1.72	0.54	-0.206	0.567	-0.48	-0.474			-0.0773	-1.35	1.49	-0.91	-1.09	1.37
-0.892	0.151	-1.32	0.28	-0.414	0.93	-0.892	-0.789			-0.0227	-1.65	1.6	-1.25	-0.0115	1.17
-1.34	0.12	-0.399	0.77	0.119	1.04	-0.338	-1.19			-0.0109	-1.62	1.73	-1.08	-0.688	1.71
-1.46	-0.2	-0.0091	0.512	-0.0302	0.388	0.381	-0.876			0.0324	-1.2	1.27	-0.969	-0.546	1.46
-1.07	-0.306	-0.649	0.616	-0.943	0.256	0.104	-1.04			0.0696	-1.25	1.57	-1.27	-0.768	1.5
-1.4	-0.118	-1.2	1.2	-0.765	0.888	-0.526	-1.2			0.0946	-1.81	1.33	-1.34	-0.166	1.41
-1.58	-0.334	-0.566	0.959	-0.508	1.07	-0.641	-0.65			0.308	-1.69	1.47	-1.08	-0.0396	0.897
-1.89	0.002	-0.328	0.733	-0.856	0.995	-0.331	-1.06			0.475	-1.74	1.48	-0.978	-0.248	0.77
-1.34	-0.162	-1.21	0.582	-0.941	1.22	-0.0285	-0.962			0.474	-2.04	1.33	-1.01	-0.194	1.16
-1.86	-0.28	-0.755	0.736	-0.743	1.39	-0.617	-1.31			0.811	-1.26	1.32	-0.829	-0.0505	0.607
-1.19	-0.267	-0.573	1.14	-0.559	1	-1.16	-1.06			0.812	-2.06	1.42	-0.562	-0.202	0.93
-1.4	0.517	-0.429	1.38	-0.851	1.55	-0.906	-0.917			0.762	-2.27	1.31	-0.447	0.166	0.612
-1.49	-0.112	0.185	1.21	-1.06	2.07	-0.458	-0.822			0.535	-1.91	1.28	-0.413	-0.2	0.28
-1.34	-0.591	0.53	1.71	-0.513	1.14	0.0858	-1.05			0.503	-0.79	1.06	-0.382	-0.104	0.397
-1.21	0.00835	0.165	1.61	-0.514	0.283	0.475	-0.984			0.436	0.111	1.41	-0.439	-0.0965	-0.15
-1.22	0.404	-0.308	0.838	-1.01	0.266	0.0318	-0.847			0.528	-0.202	1.13	-0.454	-0.185	0.143
-1.08	-0.276	0.593	1.04	-1.27	0.669	-0.342	-0.876			0.463	-0.289	0.969	-0.442	-0.216	-0.234
-1.22	0.108	-1.66	1.06	-0.819	0.895	-0.0305	-0.929			0.272	-0.287	1.24	-0.288	-0.615	0.204
-1.33	0.775	0.235	0.961	-0.228	0.556	0.377	-0.78			0.494	-0.211	0.823	-0.501	-0.678	0.264
-0.888	1.12	0.0584	0.48	0.109	0.479	0.291	-0.899			0.718	-0.669	1.04	-0.553	-0.591	-0.192
-1.21	1.27	-1.05	0.758	0.0344	0.693	-0.553	-0.62			0.917	-1.11	1.01	-0.516	-0.467	0.671
-1.18	1.75	-0.888	0.96	-0.538	0.848	-0.567	-0.061			0.72	-1.04	1.05	-0.326	-0.164	-0.01
-1.1	2.74	-1.35	0.0603	-0.921	1.11	0.163	-0.443			0.744	-0.489	0.999	-0.177	-0.512	-0.00732
-1.51	2.58	-0.44	0.107	-0.766	1.94	0.313	-0.614			0.805	-0.373	0.818	-0.017	-0.488	0.224
-1.19	3.04	-0.712	-0.115	-0.536	2.44	-0.00993	-0.755			0.894	-0.0574	1.2	0.0268	-0.124	-0.161
-1.24	2.24	-0.86	0.0393	-0.188	2.13	-0.144	-0.336			0.981	0.318	1.09	-0.142	-0.343	-0.175
-1.45	2.18	-0.78	-0.6	0.134	2.13	-0.128	-0.417			0.828	0.697	1.04	-0.0984	-0.675	0.144
-1.15	1.78	-0.933	-0.258	0.19	2.34	-0.34	-1.46			0.642	-0.247	1.14	-0.109	-0.702	-0.201
-0.722	1.51	-1.11	-0.298	0.0694	2.25	-0.189	-0.635			0.75	1.16	0.706	-0.179	-0.0639	0.222
-0.849	1.18	-0.954	-0.454	0.23	2.04	0.133	0.391			0.641	-0.145	1.14	-0.344	-0.168	-0.139
-0.538	0.882	-1.33	0.097	-0.0512	1.21	0.184	-0.00832			0.487	-0.356	0.479	-0.389	-0.528	-0.082
-0.918	0.877	-0.815	0.0212	-0.673	0.742	-0.166	0.39			0.517	-0.505	0.728	-0.212	-0.31	-0.00629
-0.9	0.648	-1.67	0.118	-0.177	0.924	-0.344	0.168			0.637	-0.111	0.716	-0.184	-0.721	0.372
-0.92	0.529	-1.9	0.372	0.567	1.08	0.195	0.154			0.403	0.252	0.857	-0.276	-0.797	0.86
-0.503	0.701	-0.374	0.153	0.72	1.83	0.197	-0.13			0.41	-1.13	0.993	-0.0336	-1.05	0.409
-0.593	0.628	-0.898	0.926	0.731	1.93	-0.461	0.138			0.364	-0.6	0.855	0.066	-0.775	0.188
-1.13	0.123	-0.709	0.539	0.334	1.16	-0.435	-0.0233			0.256	-0.885	0.86	0.137	-0.525	0.273
-0.554	0.314	-1.06	0.668	-0.456	0.835	0.129	-0.199			0.224	-1	0.901	-0.033	-0.594	0.613
-0.585	0.735	-0.633	0.599	-0.331	0.861	-0.132	0.108			0.151	-1.15	0.796	-0.0516	-1.14	-0.11
-0.308	-0.0648	-0.382	0.365	0.333	0.722	-0.673	-0.354			0.128	-0.322	1.14	-0.339	-1.12	0.662
-1.16	-0.209	-0.252	0.295	0.807	0.116	-0.434	0.145			0.19	-0.257	1.21	-0.612	-0.703	0.345
-0.929	0.352	-0.894	0.537	0.412	0.404	0.244	0.558			0.213	-0.72	0.89	-0.678	-0.333	0.747
-0.97	0.571	-0.986	0.86	-0.234	1.19	0.75	-0.451			0.257	-0.925	0.687	-0.855	-1.14	0.773
-0.51	0.186	-0.273	0.576	0.00941	1.06	0.597	0.265			0.398	-1.17	0.891	-0.761	-0.861	1.18
-0.779	0.361	-0.244	0.205	0.45	1.03	0.215	-0.051			0.159	-1.16	0.664	-0.989	-0.834	1.25
-0.918	-0.321	-0.128	0.569	0.28	2.16	0.105	-0.208			0.19	-0.73	0.805	-0.957	-0.453	1.25
-0.886	0.209	0.01	0.145	0.118	2.03	-0.0174	-0.553			0.281	-0.87	1.06	-0.645	-0.371	0.966
-0.997	0.405	0.0173	0.226	0.349	1.21	-0.406	0.0416			0.343	-1.37	1.05	-0.798	-0.766	1.04
-0.869	0.304	-0.369	0.457	0.54	0.905	-0.397	0.0233			0.395	-1.18	0.859	-1.21	-1.1	1.12
-1.03	1.11	-0.493	0.382	0.687	1.12	-0.0365	0.0386			0.431	-1.04	1	-1.1	-0.772	1.24
-1.37	0.606	0.316	0.318	1.58	1.17	-0.32	-0.137			0.305	-1.21	0.953	-0.857	-0.594	1.32
-1.16	0.649	-0.468	-0.233	1.46	0.941	-0.419	0.00496			0.376	-1.12	0.944	-0.661	-0.285	1.63
-1.22	0.0618	0.161	-0.376	0.757	0.932	0.523	-0.237			0.259	-1.33	1.04	-0.64	-0.0271	1.44
-1.07	-0.00698	-0.214	-0.876	1.28	0.714	1.08	-0.246			0.229	-1.17	0.831	-0.647	-0.0907	1.81
-0.935	-0.692	0.821	-0.426	1.95	0.805	0.701	0.356			0.271	-1.21	1.24	-0.58	-0.268	1.61
-0.663	-0.431	0.729	-0.326	1.71	1.05	0.329	0.0912			0.152	-0.492	1.37	-0.612	-0.236	1.57
-0.661	0.00709	1.12	-0.0534	1.2	0.387	0.842	0.286			0.0975	-0.728	1.45	-0.558	-0.238	1.34
-0.795	-0.388	0.413	-0.353	0.898	-0.0621	0.786	0.462			0.0668	0.111	1.09	-0.497	-0.00934	1.3
-0.791	-0.0266	1.16	-0.403	0.905	0.754	0.501	0.286			-0.091	-0.0197	1.31	-0.505	-0.0138	0.319
-1.03	-0.89	0.143	0.157	1.27	1.34	0.884	-0.14			-0.101	0.0997	1.47	-0.582	-0.379	1.18
-1.32	-0.631	-0.135	-0.0652	1.52	1.08	0.832	-0.109			-0.117	-0.279	1.37	-0.617	-0.152	0.37
-1.28	-0.825	0.509	0.326	1.03	0.699	0.916	-0.206			-0.128	0.179	1.38	-0.386	-0.0378	0.646
-0.913	-0.935	0.193	0.828	0.443	0.31	1.47	-0.243			0.0109	-0.42	1.38	-0.402	-0.98	0.489
-1.04	-1.03	0.202	0.901	0.409	0.532	1.02	-0.276			-0.0659	-0.261	1.56	-0.408	-0.456	0.4
-1.22	-0.608	0.861	1.18	0.632	0.61	0.484	-0.322			-0.103	-0.282	1.3	-0.586	-1.04	0.414
-1.53	-1.33	0.784	1.29	0.661	1	0.948	0.0247			-0.0206	-0.753	1.24	-0.738	-0.902	0.2
-1.49	-1.55	-0.156	1.45	0.463	1.61	1.41	0.0637			0.112	-1.31	1.43	-1.06	-0.745	0.302
-1.43	-1.89	0.0237	1.5	0.8	1.08	1.24	-0.567			0.0597	-0.726	1.31	-0.9	-0.243	0.325
-1.49	-1.58	-0.00866	0.864	1.43	0.269	1.11	-0.391			0.175	-1.09	1.43	-0.938	-0.839	-0.000584
-1.36	-1.07	-0.445	0.238	1.81	0.62	0.378	-0.801			0.131	-0.295	1.46	-0.745	-0.327	-0.352
-0.688	-0.573	-0.369	0.963	1.73	0.907	0.192	-0.0964			0.154	-0.725	1.48	-1.06	-0.807	0.178
-1.54	0.341	0.0298	0.899	1.34	0.331	0.667	-0.911			0.0124	-0.569	1.16	-1.4	-0.814	0.0343
-1.25	-0.546	0.39	0.575	1	0.284	0.455	-0.6			0.0755	0.174	1.62	-1.4	-1.25	0.208
-1.11	-1.02	-0.599	0.87	0.981	0.461	0.0696	-0.899			0.0634	0.0524	1.64	-1.09	-1.28	0.106
-0.96	-0.853	-1.09	0.667	0.892	0.166	0.357	-0.723			0.113	0.124	1.25	-0.721	-0.964	0.184
-0.996	-0.918	-0.774	0.435	0.706	0.172	0.584	-0.932			0.173	-0.48	1.4	-0.6	-0.642	0.343
-0.865	-0.476	-1.06	0.0509	1.21	0.63	0.561	-0.264			-0.0597	-0.0176	1.31	-0.638	-0.378	-0.00534
-0.844	0.213	0.182	0.0295	1.57	0.323	0.25	-0.671			-0.106	-0.343	1.35	-0.736	-0.455	-0.166
-0.891	1.03	-0.0243	0.102	0.709	-0.24	0.204	-0.82			-0.149	-0.000654	1.15	-0.817	-0.489	-0.0995
-1.05	1.56	-0.108	0.197	0.33	-0.471	0.857	-0.811			-0.00107	-0.347	1.17	-0.773	-0.0875	-0.0191
-0.929	1.99	-0.502	0.0247	1.11	-0.338	1.67	-0.494			-0.184	-0.33	0.889	-0.845	-0.222	0.123
-1.05	1.56	-0.164	0.0621	1.24	0.169	1.69	-0.0199			-0.122	-0.636	0.776	-0.977	-0.316	0.37
-0.605	1.51	-0.134	0.315	0.691	0.602	1.38	0.0808			-0.0416	-0.494	0.716	-1.08	0.0392	0.375
-1.14	0.533	-0.0322	0.222	0.426	-0.12	1.57	-0.043			-0.0242	-0.95	0.698	-1.19	0.673	0.213
-1.2	0.65	0.337	-0.147	0.658	-0.457	1.96	0.291			0.014	-0.863	0.851	-1.32	0.193	0.159
-0.768	0.997	-0.485	0.228	0.639	0.447	1.61	-0.0881			-0.132	-0.711	0.807	-1.55	-0.0864	0.596
-1.28	1.21	-0.445	-0.504	0.494	0.836	1.01	0.508			-0.11	-0.227	1.18	-1.53	0.143	0.212
-1.12	1.5	-0.836	-0.219	0.104	0.269	1.03	0.96			-0.0275	-0.0789	0.783	-1.52	0.563	0.225
-0.951	1.2	-0.401	-1.22	0.369	-0.0338	1.72	0.402			-0.244	-0.225	0.981	-1.47	0.165	0.525
-0.676	1.36	-0.385	-1.11	1.24	0.884	1.49	1.03			-0.112	-0.209	0.99	-1.57	0.379	0.51
-0.785	1.28	-0.94	-0.484	0.98	1.37	0.788	0.468			-0.185	0.384	0.918	-1.67	0.576	0.555
-1.05	1.2	-0.841	-0.315	0.156	0.391	0.936	0.949			-0.0163	0.138	0.83	-1.65	0.316	0.639
-1.03	1.27	-0.709	-0.126	0.276	-0.585	1.45	0.462			-0.0491	-0.238	0.696	-1.53	0.101	0.864
-1.3	0.968	-0.594	0.253	0.497	-0.0155	1.41	0.395			0.136	-0.21	0.839	-1.63	-0.0143	0.7
-0.957	0.578	-0.255	0.223	0.417	0.725	1.4	0.105			0.116	-0.538	0.857	-1.33	0.259	1.22
-0.931	1.03	-0.436	0.9	0.64	0.764	1.9	0.422			-0.00351	-0.453	1.4	-1.21	0.229	1.89
-1.18	0.185	-0.293	0.986	0.793	0.92	2.09	-0.171			-0.0775	-0.61	0.639	-1.26	0.367	1.73
-1.51	-0.452	-0.22	1.27	1.16	0.927	1.61	0.357			0.168	-0.943	0.795	-1.43	0.122	1.32
-1.03	-0.688	0.266	0.976	1.1	0.845	1.61	-0.254			0.348	-1	0.549	-1.36	0.207	1.75
-1.12	-0.405	-0.163	0.498	0.214	0.319	1.53	-0.18			0.359	-0.558	0.786	-1.46	0.391	1.9
-1.03	-0.0186	-0.378	0.197	0.312	-0.217	1.21	-0.2			0.447	-0.406	0.72	-1.64	0.00841	1.84
-1.04	-0.69	-0.829	0.159	0.952	-0.401	2.15	0.0139			0.542	-0.619	0.684	-1.74	-0.245	1.76
-1.64	0.118	0.0197	0.441	1.08	-0.00716	2.95	0.293			0.4	-0.805	0.451	-1.59	-0.143	1.29
-0.904	-0.0722	-0.0991	-0.192	0.886	0.687	2.81	0.495			0.447	-1.4	1.15	-1.74	-0.0291	1.47
-1.39	0.205	0.0592	-0.0579	1.02	0.828	2.24	0.141			0.371	-0.862	0.965	-1.74	0.16	1.37
-1.45	0.647	0.244	-0.251	1.26	0.26	1.73	-0.142			0.521	-0.923	0.545	-1.91	-0.139	0.851
-1.36	1.03	0.168	-0.151	0.999	0.166	1.69	0.0127			0.868	-0.864	0.795	-2.13	-0.0532	0.742
-1.34	0.396	-0.247	0.566	0.38	1.08	2.01	-0.492			0.975	-1.21	0.491	-1.82	-0.306	0.719
-1.81	0.474	-0.117	1.69	0.167	1.15	1.43	-0.484			1.11	-0.0833	0.543	-1.36	-0.472	0.639
-1.25	0.883	-0.184	1.94	0.788	0.649	1.25	-0.604			0.857	-0.245	0.72	-1.12	0.189	0.259
-1.92	0.508	-0.145	2.01	1.26	0.493	1.81	-0.361			0.746	-0.902	0.557	-1.17	-0.111	0.621
-1.11	1.17	-0.373	2.29	1.05	0.86	1.68	-0.289			0.661	-0.1	0.741	-1.4	-0.158	0.28
-0.964	0.763	0.734	2.28	0.655	0.641	1.32	-0.261			0.671	-0.285	0.685	-1.45	-0.359	0.69
-1.18	0.551	-0.264	2.5	1.08	0.314	1.64	-0.997			0.685	0.0898	0.636	-1.2	0.09	0.333
-0.965	0.137	0.18	2.59	1.32	0.648	1.69	-0.484			0.643	-0.293	0.38	-0.995	-0.232	0.202
-1.08	0.56	0.307	1.92	0.845	0.486	1.38	-0.443			0.638	-0.151	0.451	-0.84	-0.257	0.779
-1.26	0.094	-0.17	1	0.712	-0.01	1.5	-0.778			0.576	0.808	0.7	-0.84	-0.0452	1.08
-1.14	0.104	-0.51	0.28	1.11	0.366	1.47	-0.555			0.826	-0.812	0.674	-0.976	-0.107	0.779
-0.937	-0.314	-0.247	1.27	1.03	1.09	1.27	-0.311			0.66	0.22	0.759	-1.04	0.0569	0.94
-1.06	-0.592	0.0475	0.891	0.722	1.36	1.47	-0.528			0.744	-0.282	0.793	-0.847	0.00925	1.42
-1.37	0.264	-0.192	1.07	0.776	1.49	1.36	-0.766			0.646	-0.162	0.98	-0.761	0.385	0.94
-1.29	0.012	-0.451	1.24	0.519	0.762	1.13	-0.684			0.589	-0.423	1.16	-0.725	0.314	0.829
-0.953	-0.53	-0.566	1.17	0.466	0.02	0.953	-0.721			0.497	-0.708	0.785	-0.826	0.0206	1.11
-1.36	-0.794	-1.29	0.495	0.43	0.35	0.445	-0.654			0.537	-1.21	0.855	-0.767	0.186	0.998
-0.943	-0.516	-1.54	0.372	-0.141	1	0.562	-0.68			0.348	-1.07	1.32	-0.879	0.152	0.973
-1.15	-0.088	-1.08	-0.0578	-0.207	1.18	0.915	-0.575			0.486	-1.17	1.17	-0.904	0.481	0.646
-1.35	-0.683	-1.02	0.409	0.52	1.09	0.341	-0.809			0.442	-1.33	1.45	-1.05	0.0357	0.755
-1.09	-0.434	-0.251	0.805	1.08	1.45	0.385	-0.728			0.312	-1.72	1.57	-1.04	0.873	0.908
-0.751	0.0753	-0.7	0.807	0.529	1.4	1.36	-0.656			0.362	-1.26	1.37	-1.19	-0.0368	1.56
-0.737	-0.231	-0.109	0.963	0.483	0.535	1.1	-0.592			0.313	-1.17	1.67	-1.3	-0.00203	1.3
-0.539	-0.511	-0.036	0.896	1.13	0.132	0.453	-1.05			0.301	-1.13	1.18	-1.14	-0.508	1.55
-0.0956	-0.0352	-1.19	0.883	0.905	0.464	0.86	-0.835			0.295	-0.949	1.48	-1.08	-0.00594	1.48
-0.864	0.574	-0.856	1.49	0.378	0.676	1.67	-0.715			0.0535	-0.785	1.2	-1.01	-0.195	0.793
-0.898	0.211	-0.904	2.17	0.105	0.659	1.62	-0.904			0.216	-1.08	0.984	-1.06	-0.293	1.42
-1.02	0.599	-1.07	2.04	-0.00294	0.408	1.26	-0.756			0.119	-0.711	1.27	-1.18	-0.318	1.08
-1.22	1.11	-0.815	2.19	0.0996	0.416	1.35	-0.521			0.145	-0.924	1.12	-1.12	-0.749	1.43
-1.03	0.809	-1.25	2.08	0.348	0.617	1.56	-0.681			0.0231	-0.4	1.11	-0.996	-0.45	1.16
-1.08	0.981	-2.1	2.34	0.797	0.168	1.26	-1.34			-0.106	-0.636	1.16	-0.789	-0.568	1.07
-0.868	0.488	-0.747	1.94	0.921	-0.249	1.71	-1.11			0.0154	-0.327	1.34	-0.745	0.352	1.08
-0.886	0.321	-0.664	2.38	0.273	-0.271	2.13	-0.657			0.255	-0.643	1.17	-0.715	0.611	0.84
-1.16	0.0613	0.146	2.74	-0.428	0.628	1.62	-0.525			0.429	-0.668	1.34	-0.669	0.438	1.07
-1.1	-0.785	-1.15	2.22	0.0726	1.13	1.46	-1.05			0.304	-0.75	1.34	-0.576	0.842	0.895
-1.31	-0.541	-0.858	2.51	1.19	0.911	1.52	-0.587			0.379	-0.761	1.44	-0.699	0.598	0.665
-0.655	-0.89	-1.36	2.45	1.3	0.959	1.06	-0.775			0.256	-0.597	1.42	-0.61	0.755	0.51
-1.14	-0.907	-1.16	1.98	0.538	0.918	0.904	-0.91			0.11	-1.22	1.51	-0.554	0.656	0.27
-1.27	0.0188	-1.65	2.27	-0.131	0.676	1.21	-0.633			0.147	-1.2	1.36	-0.523	1.03	0.351
-1.1	-0.286	-1.08	1.85	0.0147	0.383	1.63	-0.44			-0.0692	-1.59	1.64	-0.593	0.536	0.413
-1.11	0.166	-1.44	2.05	0.627	0.0896	1.98	-0.936			0.183	-1.15	1.59	-0.655	0.678	-0.274
-0.845	-0.48	-0.974	1.98	0.452	0.0614	2.2	-0.574			0.179	-1.25	1.62	-0.734	0.129	-0.279
-0.793	0.0235	-0.789	2.05	-0.0795	0.169	2.38	-0.652			-0.0417	-1.33	1.77	-0.86	0.189	-0.447
-0.93	-0.599	-1.97	2.26	-0.196	-0.0416	2.61	-0.562			0.0936	-1.14	1.77	-1.14	0.104	-0.24
-1.13	0.0655	-1.79	1.83	-0.198	-0.28	2.66	-0.953			0.108	-1.09	1.65	-0.982	-0.00197	-0.368
-0.662	0.229	-1.84	2.09	-0.0299	-0.131	2.46	-0.532			0.0819	-1.36	1.78	-0.965	0.198	-0.824
-1.26	-0.151	-1.31	1.79	-0.0087	0.0126	2.42	-0.937			0.0771	-1.39	2.21	-0.928	0.251	-1.67
-1.49	-0.02	-1.41	1.96	-0.446	0.00525	2.34	-0.722			0.293	-1.09	1.93	-0.959	-0.143	-0.684
-1.28	0.359	-1.6	2.27	-0.575	0.329	2.26	-0.726			0.514	-0.612	1.8	-1.05	0.357	-1.29
-1.37	0.704	-1.84	2.1	-0.558	1.02	2.14	-0.837			0.385	-0.91	1.67	-0.958	0.0347	-0.497
-1.3	0.897	-1.24	2.05	-0.779	1.34	1.81	-0.272			0.4	-0.796	1.75	-0.965	0.207	-0.893
-1.15	1.07	-0.43	2.07	-0.996	1.11	1.67	0.363			0.297	-0.933	1.76	-0.908	0.0697	-0.648
-1.38	0.275	-1.8	2.1	-0.573	1.5	1.63	0.115			0.266	-0.793	1.99	-0.923	0.0624	-0.779
-1.2	1.09	-1.14	1.94	0.226	1.98	1.68	0.241			0.209	-0.886	1.6	-0.766	-0.391	-0.655
-1.18	1.26	-1.17	1.76	0.0669	2.14	2.19	0.127			0.0977	-0.806	1.62	-0.853	-0.0415	-1.32
-1.21	0.993	-1.79	1.81	-0.389	2.83	2.62	-0.322			0.0683	-1.11	1.62	-1.05	-0.0437	-1.38
-1.93	0.67	-1.47	1.67	0.0587	3.25	2.12	-0.0577			0.0164	-0.207	1.82	-0.939	-0.229	-0.565
-1.39	1.68	-1.94	1.63	0.157	2.71	1.48	0.101			0.161	-0.897	1.68	-1.05	-0.543	-0.674
-1.1	2.4	-0.607	1.83	-0.489	2.48	1.47	-0.236			0.0204	-0.577	1.75	-1.1	-0.0853	-1.11
-1.91	2.34	-1.59	2.1	-0.651	2.76	1.61	0.143			0.108	-0.648	1.96	-1.06	-0.626	-1.14
-1.35	2.54	-1.6	1.86	-0.544	2.56	1.46	0.13			0.218	-0.936	2.06	-0.993	-0.409	-1.43
-1.73	1.92	-1.55	1.82	-0.702	1.97	1.08	-0.252			0.276	-0.436	2.09	-1.09	-0.485	-1.31
-1.12	2.28	-0.835	1.98	-0.721	1.32	0.606	-0.181			0.52	-1.16	1.88	-1.14	-0.886	-1.21
-1.47	1.78	-0.886	2.2	-0.325	1.34	1.01	-0.0171			0.296	-0.811	2.38	-1.04	-0.165	-1.26
-1.18	1.8	-1.58	1.22	-0.296	1.48	1.69	-0.537			0.345	-1.34	2.45	-1.23	-0.113	-1.56
-1.49	1.04	-1.54	0.843	-0.412	1.01	1.37	-0.213			0.314	-1.2	2.64	-1.3	-0.29	-1.37
-1.4	1.81	-1.22	0.241	-0.333	0.911	0.289	-0.642			0.334	-1.08	2.49	-1.42	-0.297	-1.2
-1.42	1.47	-2.39	0.952	-0.126	1.34	-0.218	-0.218			0.577	-1.35	2.48	-1.25	-0.183	-1.51
-1.22	0.865	-1.41	0.59	0.192	1.31	0.196	-0.513			0.824	-0.811	2.67	-1.21	-0.698	-1.71
-1.41	0.924	-1.1	0.153	-0.297	1.37	0.797	-0.712			0.821	-0.706	2.52	-1.33	-0.0339	-1.33
-0.998	0.662	-1.39	0.25	-0.823	1.88	1.11	-0.47			0.628	-1.49	2.75	-1.08	-0.0153	-0.785
-1.08	0.858	-1.16	8.18e-05	-0.648	2.01	1.08	-0.0705			0.662	-0.495	2.38	-1.05	-0.841	-1.23
-1.18	0.123	-1.46	0.156	-0.74	1.34	0.993	-0.425			0.673	-0.42	3.01	-1.24	-0.222	-1.12
-1.5	0.717	-2.14	-0.179	-1	0.283	0.71	-0.13			0.623	-0.162	2.54	-1.01	-0.904	-1.17
-0.931	0.274	-1.49	-0.294	-1.16	0.358	0.819	-0.231			0.492	-0.135	2.64	-0.906	-0.688	-0.899
-0.944	0.409	-1.62	-0.202	-1.35	1.15	1.27	-0.641			0.472	-0.535	2.47	-0.69	-0.501	-0.857
-0.65	0.0554	-1.14	-0.27	-1.39	0.947	0.92	-0.212			0.346	-0.3	2.53	-0.69	-0.447	-0.617
-0.65	0.437	-1.57	-0.405	-1.29	0.171	0.236	-0.0702			0.281	-0.687	2.14	-0.744	-0.458	-0.804
-1.15	0.504	-2.19	-0.577	-0.929	0.458	0.123	-0.267			0.422	-0.945	2.15	-0.797	0.154	-0.582
-1.06	0.362	-1.41	-0.413	-0.479	0.766	0.345	-0.0899			0.218	-1	2.08	-0.774	-0.193	-0.85
-0.93	0.211	-1.9	-0.43	-0.624	0.27	0.0388	0.0158			0.172	-1.45	1.97	-0.95	-0.0886	-1.03
-0.857	0.339	-1.91	-0.329	-0.371	0.277	0.21	0.0728			0.183	-1.36	2.21	-0.993	-0.128	-0.718
-0.821	0.334	-1.65	-0.341	-0.295	0.46	0.523	0.52			0.205	-1.52	2.1	-0.918	-0.297	-0.723
-0.772	-0.24	-1.44	-0.939	-1.19	0.367	0.217	0.232			0.23	-1.3	2.18	-1.08	-0.315	-0.704
-0.794	-0.177	-0.922	-0.176	-1.49	0.412	0.0331	0.192			0.249	-0.801	2.29	-1.39	-0.161	0.144
-1.15	0.0744	-0.754	-0.336	-0.631	0.738	0.445	0.19			0.361	-0.861	2.2	-1.46	-0.0565	-0.0192
-1.07	-0.132	-0.476	-0.554	-0.446	0.907	0.737	0.474			0.254	-0.847	1.97	-1.45	-0.168	0.0485
-0.923	-0.56	-1.15	-1.29	-0.95	0.234	0.481	0.151			0.352	-1.05	2.11	-1.31	0.0638	-0.0214
-1.02	-0.0319	-1.07	-0.719	-0.893	0.167	0.000857	0.0422			0.44	-1.02	2.06	-0.977	-0.496	-0.224
-0.871	-0.0977	-0.625	-0.459	-0.487	0.593	0.504	-0.291			0.409	-0.67	1.78	-0.829	-0.514	-0.233
-1.07	0.441	-1.21	-0.52	-0.761	0.319	0.952	0.659			0.455	-0.261	1.84	-0.957	-0.515	-0.124
-0.974	0.0837	-1.2	-0.262	-1.35	-0.119	0.26	0.508			0.341	-0.893	1.91	-1.15	-0.259	0.0738
-1.17	0.236	-0.295	-0.973	-1.43	0.39	0.0568	0.194			0.187	-1.09	2.16	-1.08	0.13	-0.233
-0.967	0.68	-0.977	-0.804	-0.725	1.04	0.451	0.0576			0.281	-0.793	2.15	-1.03	0.69	-0.391
-0.59	0.875	-0.00823	-0.451	-0.857	1.03	0.536	-0.0219			0.225	-0.748	2.02	-1.05	1.08	-0.0585
-1.24	0.433	-0.538	-0.785	-1.69	0.484	0.464	-0.155			0.166	-0.324	1.98	-0.984	0.113	0.361
-1.24	0.347	-0.222	-0.446	-1.77	-0.168	0.312	0.0768			0.161	-0.888	2.12	-1.01	0.554	-0.149
-1.42	-0.583	-0.605	-0.629	-1.05	0.3	-0.0714	1.07			0.13	-1.08	2.38	-0.801	0.612	0.449
-1.24	-1.18	-1.59	-0.774	-0.75	1.24	0.136	1.08			0.47	-0.289	2.32	-0.772	0.19	-0.0719
-0.87	-0.909	-1.36	-0.307	-0.847	0.635	0.682	0.721			0.53	-0.183	2.57	-0.708	-0.164	0.373
-0.973	-1.16	-1.02	0.153	-0.688	0.209	0.578	0.785			0.479	-0.154	2.56	-0.702	-0.175	0.317
-1.09	-0.16	-0.355	0.407	-0.618	0.625	0.174	0.769			0.422	-1.05	2.47	-0.633	0.289	0.911
-0.978	0.208	0.0549	-0.112	-0.604	0.365	0.133	0.733			0.531	-0.665	2.83	-0.658	-0.323	0.0171
-0.929	0.693	0.479	0.00397	-0.859	0.176	0.691	0.226			0.329	-0.529	2.8	-0.597	-0.449	0.206
-1.06	0.348	-0.275	0.403	-0.949	0.612	0.867	0.434			0.258	-0.834	2.61	-0.614	-0.773	0.154
-1.21	0.396	0.579	0.542	-0.633	1.24	0.595	0.677			0.28	-1.1	2.7	-0.649	-0.415	-0.426
-1.05	0.179	1.48	0.324	-0.585	1.53	0.153	0.385			0.294	-1.1	2.48	-0.619	-0.444	0.327
-0.865	0.431	0.618	-0.265	-0.852	1.05	-0.393	0.181			0.174	-0.584	2.44	-0.623	-0.305	0.015
-1.03	0.419	1.25	-0.00348	-0.642	0.601	-0.331	0.181			0.243	-0.39	2.21	-0.605	-0.647	-0.117
-0.789	0.224	-0.424	-0.13	-0.804	0.936	0.378	0.0679			0.0539	-0.774	2.37	-0.684	-0.214	-0.372
-1.12	-0.0857	0.764	0.371	-1.54	1.85	0.268	0.302			0.014	-0.727	2.43	-0.724	0.173	-0.109
-1.28	0.178	-0.786	0.346	-1.36	2.19	-0.542	0.095			0.171	-0.813	2.56	-0.518	-0.604	-0.682
-1.71	0.65	-0.552	0.198	-0.252	1.85	-0.644	-0.16			0.0766	-1.16	2.33	-0.628	-0.376	-0.663
-0.977	0.842	0.49	0.673	-0.18	1.65	0.00863	0.176			0.0732	-0.668	2.79	-0.728	-0.0325	-0.812
-1.15	0.927	-0.565	1.01	-0.7	1.63	0.973	0.416			0.0312	-0.254	2.63	-0.842	-0.416	-0.566
-1.07	1.05	0.252	0.949	-0.951	1.68	1.42	0.437			0.21	-0.508	2.46	-0.775	-0.0634	-0.608
-0.672	0.865	1.76	1.29	-0.838	1.3	1.28	0.308			0.0453	-0.00598	2.71	-0.605	-0.213	-0.45
-0.755	0.327	1.86	1.14	-0.42	0.85	0.666	0.49			0.00371	-0.578	2.57	-0.78	-0.369	0.0796
-0.588	0.856	0.838	0.987	-0.406	0.706	0.288	0.589			0.0931	-0.475	2.51	-0.922	-0.161	-0.366
-0.736	0.328	0.083	0.962	-0.411	1.45	0.261	-0.0228			0.0724	-0.0368	2.52	-0.948	-0.319	-0.512
-0.738	-0.425	0.392	1.29	-0.557	1.67	0.721	0.0644			0.0279	-0.201	2.56	-0.948	-0.325	-0.657
-1.05	0.00607	0.633	1.51	-1.01	1.85	1.34	-0.0679			-0.114	-0.789	2.67	-0.859	-0.237	-0.853
-0.873	-0.22	-0.132	1.03	-1.17	2.64	1.12	-0.0293			0.0162	0.0709	2.55	-0.891	-0.143	-0.542
-1.14	0.16	0.27	1.2	-1.37	2.44	0.361	0.357			-0.263	0.047	2.44	-0.817	-0.00337	0.074
-0.719	0.201	0.0198	0.832	-1.55	1.41	0.512	0.0566			-0.132	0.139	2.31	-0.75	-0.554	-0.972
-0.682	0.134	-0.674	1.3	-1.58	1.65	1.2	-0.00969			-0.127	-0.803	2.2	-0.87	-0.312	-0.804
-1.39	-0.7	-0.173	1.71	-1.05	2.43	1.31	0.326			-0.123	-0.608	2.51	-1.01	-0.0931	-0.869
-0.58	-0.351	-0.637	1.39	-0.658	2.1	0.656	-0.00831			-0.242	-0.77	2.55	-1.13	-0.0508	-0.422
-0.935	-0.498	0.373	2.01	-0.677	1.51	0.211	0.111			-0.258	-0.241	2.74	-1.07	-0.488	-0.488
-0.776	0.06	0.224	1.68	-0.801	1.56	0.656	0.0657			-0.237	-0.378	2.36	-0.983	0.818	-0.725
-0.566	1.39	-1.07	1.31	-0.772	1.71	1.1	-0.326			-0.19	-0.334	2.13	-1.16	-0.148	-0.543
-0.584	0.287	-1.1	1.57	-0.598	1.59	0.882	-0.523			-0.207	-0.952	2.25	-1.29	0.116	-0.342
-0.96	0.324	-0.912	1.41	-0.168	1.26	0.385	-0.23			-0.0995	-0.334	2.39	-1.43	0.601	-0.287
-0.902	0.0602	-0.309	1.8	0.0876	1.33	0.0525	-0.436			-0.133	-0.422	2.4	-1.44	0.252	-0.1
-0.774	0.245	-1.23	2.04	-0.118	1.26	0.187	-0.53			-0.268	-0.246	2.49	-1.48	0.66	-0.83
-1.01	-0.394	-0.871	2.71	-0.692	0.992	0.559	-0.117			-0.238	-0.426	2.51	-1.49	0.728	-0.0443
-0.698	0.0716	-1.06	2.25	-0.731	0.603	0.874	-0.201			-0.0923	-0.408	2.38	-1.18	1.29	-0.51
-1	0.0442	-0.374	2.49	-0.573	0.0524	0.695	-0.819			0.0147	0.117	2.5	-1.1	0.894	-0.675
-0.946	0.608	-0.7	2.21	-0.831	0.188	0.407	-0.335			-0.0673	-0.135	2.7	-1.35	0.469	-0.761
-1.16	0.00641	-0.519	2.46	-1.2	0.968	0.735	-0.62			-0.0122	0.824	2.33	-1.3	0.304	-0.214
-0.522	-0.494	-0.9	2.59	-0.801	0.953	1.58	-0.289			-0.031	0.788	2.53	-1.07	0.353	-0.636
-0.405	-0.53	-0.963	2.16	-0.47	0.571	1.77	-0.442			-0.0947	1.36	2.95	-1.01	0.459	-0.128
-0.523	-0.273	-1.71	2.77	-0.815	0.583	0.844	-0.662			-0.125	1.15	2.88	-1.31	0.163	-0.513
-0.973	-0.157	-0.785	1.53	-0.981	1.03	0.445	-0.823			-0.0773	1.17	2.78	-1.39	0.467	-0.59
-0.586	-0.192	-1.28	1.77	-0.573	1.28	1.11	-0.502			-0.142	0.549	2.81	-1.35	0.788	-0.16
-0.659	-0.167	-0.767	1.87	-0.589	0.625	1.34	-0.192			-0.287	0.407	3.25	-1.67	1.3	-0.144
-1.06	-0.672	-1.59	1.82	-0.74	0.165	1.23	-0.817			-0.295	0.0175	3.1	-1.58	1.34	-0.326
-0.711	-0.161	-1.01	1.73	-0.852	0.272	1.03	-0.517			-0.276	-0.337	3.21	-1.5	2.04	-0.409
-0.573	-1.02	-1.99	1.83	-0.767	0.151	0.54	-0.621			-0.221	0.0386	3.22	-1.43	1.85	-0.586
-0.513	0.239	0.0866	2.13	-0.453	-0.192	0.176	-0.466			-0.285	-0.904	2.99	-1.63	2.22	-0.312
-1.39	-0.244	-0.617	1.83	-0.532	0.154	0.274	-0.632			-0.128	-0.843	2.78	-1.54	1.95	-0.0625
-0.768	-0.421	-0.731	1.7	-0.866	0.59	0.77	-0.463			-0.131	-0.37	2.83	-1.49	2.16	-0.582
-0.86	-0.0245	-1.48	1.52	-1.04	0.458	0.999	-0.356			0.042	-1.23	2.47	-1.54	1.96	0.229
-1.24	-0.387	0.886	1.16	-0.379	-0.208	0.848	-0.228			-0.242	-0.837	2.46	-1.8	1.26	-0.151
-1.09	-0.144	-0.0642	1.32	-8.88e-05	-0.786	0.544	0.0639			-0.096	-0.689	2.55	-1.78	1.36	-0.153
-1.03	-0.212	-0.0128	1.7	-0.634	-0.562	0.198	-0.236			-0.208	-1.04	2.52	-1.73	1.94	-0.12
-1.11	-0.412	0.943	1.67	-1.1	-0.244	0.0396	-0.431			-0.249	-0.864	2.56	-1.79	1.18	0.0236
-0.764	-0.172	-0.987	1.21	-0.778	-0.579	0.173	-0.657			-0.214	-1.16	2.89	-2	1.02	0.452
-0.741	-0.647	-0.407	1.43	-0.48	-0.411	0.000748	-0.189			-0.279	-1.2	2.58	-1.89	0.719	0.209
-1.04	-0.752	-0.329	1.75	-0.786	0.553	0.203	-0.607			-0.17	-0.568	2.71	-1.51	1.02	-0.0553
-0.716	-0.897	-0.142	1.1	-0.586	0.544	0.674	-0.0153			-0.369	0.311	2.91	-1.43	1.33	0.569
-0.398	-0.782	0.207	1.64	0.242	-0.217	0.92	-0.324			-0.106	0.135	2.81	-1.7	0.986	0.881
-0.535	-0.55	-0.819	1.12	0.734	0.0856	0.866	0.0369			-0.0606	-0.479	2.49	-1.91	0.715	0.925
-1.05	-0.596	-0.156	1.36	0.518	-0.219	0.0654	-0.221			-0.0271	-0.16	2.58	-1.97	0.698	1.03
-0.322	-1.19	-1.63	1.31	0.155	-0.862	-0.104	-0.109			0.251	-0.033	2.79	-1.78	0.944	0.732
-0.661	-1.34	-0.856	1.03	-0.393	-0.323	0.28	-0.314			0.377	0.368	2.56	-1.72	0.757	0.325
-0.73	-1.02	-0.993	1.67	-0.679	-0.358	0.493	-0.123			0.319	-0.163	2.79	-1.45	0.419	0.538
-0.857	-0.154	0.0201	1.44	-0.219	-0.37	0.225	0.00647			0.307	-0.0569	2.58	-1.45	0.838	0.112
-0.782	-0.859	-1.2	1.05	0.263	0.277	-0.325	0.0411			0.269	-0.501	2.39	-1.66	0.302	0.525
-0.469	0.231	0.0121	1.05	0.154	0.164	-0.862	0.0118			0.273	0.132	2.61	-1.7	0.835	0.587
-0.917	0.352	-0.128	0.316	-0.118	-0.406	-0.678	-0.267			0.258	-0.686	2.49	-1.81	0.703	0.242
-0.863	0.617	-0.573	0.245	0.0359	-0.479	-0.0453	-0.0413			0.18	0.00172	2.56	-1.81	0.168	0.361
-0.326	1.04	0.0424	0.774	0.122	-0.214	0.0792	0.0145			0.294	-0.705	2.31	-1.87	0.916	0.444
-0.93	0.979	0.257	0.947	-0.382	-0.00578	-0.467	0.153			0.19	-0.828	2.18	-1.76	0.605	-0.154
-0.938	0.632	-0.0154	0.526	-0.392	0.302	-0.373	0.379			0.293	-0.593	2.18	-1.93	0.739	0.453
-0.803	0.637	-0.432	0.851	-0.229	0.339	-0.0243	0.154			0.159	-0.862	2.49	-1.75	0.927	0.168
-1.02	0.848	-0.953	0.87	-0.151	0.0382	-0.277	0.199			0.171	-0.435	2.68	-1.44	0.883	0.587
-1.11	0.133	-1.31	0.935	0.776	-0.126	-0.361	0.102			0.282	-0.391	2.61	-1.34	0.434	0.107
-1.02	-0.0143	-0.714	0.328	0.645	0.0899	0.192	0.031			0.291	-0.859	2.48	-1.26	0.914	0.0276
-1.3	-0.709	0.674	0.452	-0.685	-0.42	0.417	-0.283			0.397	-0.798	2.73	-1.27	0.905	-0.405
-0.912	0.623	0.464	0.618	-1.24	-0.661	0.0128	-0.368			0.228	-0.764	2.74	-1.39	0.862	-0.306
-1.17	-0.119	-0.24	0.756	-0.68	-0.0343	-0.177	-0.404			0.0545	-0.388	2.63	-1.43	1.11	0.0212
-0.668	-0.224	0.315	0.271	0.0131	0.629	0.182	-0.264			0.311	0.294	2.31	-1.31	0.747	-0.278
-1.6	0.388	-0.23	1.02	0.0653	0.906	0.589	-0.391			0.354	0.0469	2.54	-1.39	0.75	-0.0888
-1.15	0.0579	-0.5	1.63	-0.0255	0.984	0.721	-0.448			0.339	0.534	2.41	-1.54	1.3	0.117
-0.674	0.0476	-0.125	1.29	-0.0352	0.845	0.937	-0.385			0.267	-0.747	2.64	-1.64	0.853	0.0207
-0.742	-0.135	0.54	1.54	-0.634	0.468	0.74	-0.0794			0.274	-0.392	2.75	-1.6	0.423	0.215
-0.827	-0.125	0.0979	0.986	-0.823	0.437	0.406	-0.585			0.284	-0.551	2.41	-1.53	0.545	0.00402
-1.04	-0.119	1.02	0.656	-0.762	0.444	0.678	-0.421			0.111	-0.191	2.62	-1.26	-0.0928	-0.22
-0.795	-0.254	0.423	0.863	-0.848	0.328	1.52	-0.0176			-0.0253	-0.505	2.77	-1.17	0.0753	0.159
-0.949	0.0282	0.0798	0.625	-0.839	0.221	1.89	-0.136			-0.0479	-0.889	2.5	-1.19	-0.168	0.276
-0.931	0.455	-0.444	0.618	-0.451	-0.148	1.38	-0.222			-0.0388	-0.559	2.53	-1.26	0.211	-0.154
-1.08	0.378	-0.624	0.129	-0.337	-0.347	0.778	0.121			0.0408	-0.242	2.97	-1.35	-0.342	-0.306
-0.831	0.228	-0.497	0.151	-0.419	0.203	0.328	-0.266			0.332	-0.298	2.76	-1.37	-0.37	-0.349
-1.24	0.0629	0.747	0.231	-0.615	0.51	0.536	0.101			0.316	-0.323	2.57	-1.5	-0.401	-0.66
-0.768	-0.265	0.817	0.0708	-0.588	-0.203	1.02	0.0694			0.508	-0.683	2.76	-1.48	-0.403	-0.415
-1.27	-0.76	0.547	-0.0564	-0.46	-0.449	1.16	-0.306			0.62	-0.759	2.66	-1.4	0.0547	-0.188
-0.679	-0.5	0.633	-0.3	-0.491	0.9	1.07	0.186			0.459	-0.851	2.87	-1.29	0.131	-0.535
-1.41	-0.672	1.15	0.188	-0.852	2.06	1.14	-0.335			0.495	-0.821	2.85	-1.33	0.0273	-0.711
-0.968	-0.452	0.309	0.494	-0.588	1.68	1.01	-0.115			0.436	-0.722	3.28	-1.49	0.0225	-0.224
-0.862	-0.706	0.973	0.544	-0.242	1.42	0.813	-0.655			0.479	-0.712	2.94	-1.44	-0.157	-0.119
-0.917	-0.533	1.17	0.463	-0.303	1.25	0.965	-0.285			0.441	-0.829	2.99	-1.25	0.367	-0.201
-0.842	-0.844	1.2	0.634	-0.297	1.15	1.24	-0.156			0.329	-0.584	2.94	-1.48	0.466	-0.13
-0.916	-1.02	0.921	0.116	-0.27	1.51	0.971	0.163			0.343	-0.77	2.81	-1.73	0.0201	-0.484
-1	-0.924	1.3	0.796	-0.273	1.83	0.439	-0.294			0.413	-1.41	2.96	-1.81	0.304	-0.653
-0.898	-0.695	0.55	0.365	0.335	1.71	0.258	-0.0591			0.252	-0.781	2.92	-1.64	0.0939	-0.581
-0.628	-0.741	-0.614	0.536	0.635	1.66	0.682	0.0372			0.308	-1.06	2.95	-1.51	-0.148	-0.278
-1.03	-1.55	-0.848	0.247	0.398	2.21	1.08	-0.446			0.457	-0.271	2.88	-1.35	0.051	0.129
-0.971	-0.821	-0.864	0.408	0.425	2.27	0.994	-0.455			0.681	-0.709	3.2	-1.26	-0.164	0.311
-0.868	-1.38	-1.05	0.367	0.257	1.54	1.18	-0.248			0.781	-0.767	3.27	-1.31	0.303	0.152
-1.19	-1.15	-0.316	0.482	-0.0806	1.12	1.69	-0.493			0.971	-1.37	3.21	-1.36	-0.0662	0.0295
-0.708	-0.847	0.0621	0.709	-0.219	2.06	1.73	-0.877			1.07	-1.1	3.12	-1.35	-0.176	0.881
-0.714	-1.39	-0.841	0.745	0.166	2.78	1.65	-0.447			0.933	-0.868	3.36	-1.31	-0.0544	0.616
-0.511	-1.11	-0.477	0.56	-0.394	1.84	1.47	-0.0257			1.05	-1.6	3.12	-1.13	0.289	0.327
-1.05	-1.56	0.0529	0.159	-0.63	1.38	0.857	-0.439			1.12	-0.822	3.24	-1.09	-0.393	0.252
-0.847	-0.83	0.0048	0.51	0.0598	1.58	0.595	-0.635			1.12	-1.62	2.8	-1.28	-0.337	-0.0217
-0.984	-1.01	-0.172	0.769	0.0768	1.75	1.13	-0.493			1.04	-1.06	2.98	-1.36	-0.0671	0.324
-1.25	-0.705	-0.369	0.599	-0.864	1.67	1.34	-0.781			1.13	-1.44	2.67	-0.999	-0.0964	0.404
-0.92	-0.793	-0.507	0.679	-1.01	1.09	1.03	-0.336			1.25	-1.57	2.54	-0.863	-0.471	0.518
-1.18	-0.515	0.352	0.166	-0.589	0.694	1.11	-0.113			1.06	-1.19	2.65	-0.803	-0.393	0.657
-0.794	-0.185	-0.0769	0.29	-0.869	1.08	1.45	-0.665			1.13	-0.988	2.79	-0.818	-0.445	0.903
-0.989	-0.321	-0.244	1.02	-1.2	1.55	1.62	-0.543			0.828	-1.41	3.12	-0.94	-0.0332	1.11
-0.693	-0.773	0.442	0.0462	-0.872	1.25	1.2	-0.47			1	-1.69	2.84	-0.772	-0.114	0.52
-0.775	-0.861	0.0649	0.591	-0.846	0.731	0.752	-0.479			0.855	-0.117	3.02	-0.745	-0.412	0.848
-0.777	-1.43	-0.707	0.315	-1.38	0.565	0.763	-0.578			0.855	0.333	3.05	-0.736	-0.377	1.05
-0.689	-1.45	-0.465	0.6	-1.25	0.524	1.41	-0.156			0.871	-0.523	3.12	-0.885	-0.167	0.53
-0.655	-1.06	-0.0666	0.761	-0.781	0.722	2.11	-0.549			0.694	-0.387	2.91	-0.725	-0.654	0.811
-0.939	-1.35	-0.275	0.532	-1.06	0.587	1.5	-0.346			0.736	-0.655	3.2	-0.725	0.213	0.7
-0.735	-0.724	-0.338	0.106	-1.03	0.328	0.942	-0.453			0.882	-0.517	3.14	-0.832	-0.293	0.0689
-1.04	-0.877	0.363	-0.0199	-0.532	0.591	1.66	-0.725			0.766	-0.714	3.4	-0.913	-0.238	0.839
-0.739	-0.149	-0.474	0.31	-0.449	0.533	1.73	-0.0359			0.953	-0.958	3.29	-0.854	-0.389	0.728
-0.667	-0.569	-0.506	-0.0403	-0.775	0.589	0.954	-0.81			0.791	-0.598	3.51	-0.919	-0.394	0.336
-0.8	-0.642	-0.0433	0.869	-1.14	0.52	0.964	-0.284			0.934	-0.56	3.45	-0.985	0.0137	0.281
-0.66	0.00108	0.439	1.4	-0.802	-0.296	1.59	-0.69			0.834	-0.101	2.85	-0.962	-0.0853	0.573
-0.754	-0.412	0.119	1.07	-0.26	-0.0967	1.44	-0.324			0.739	-0.895	3.08	-0.906	-0.175	0.086
-0.831	-0.0121	-0.459	0.57	-0.685	0.204	0.556	-0.912			0.688	-0.74	3	-0.968	-0.372	0.778
-1.21	-0.909	0.23	0.566	-0.847	0.37	0.652	-0.496			1.05	-0.917	2.9	-0.964	-0.198	0.654
-1.08	-0.446	0.836	0.47	-0.521	0.316	1.51	-0.571			1.13	-0.429	2.87	-0.754	-0.58	0.146
-0.803	-0.74	-0.43	0.729	-0.405	0.108	1.5	-0.838			1.32	-0.44	2.77	-0.635	-0.232	0.714
-1.22	-0.701	-0.412	1.21	-0.476	-0.155	0.876	-1.09			1.35	-0.621	2.69	-0.756	-0.647	1.06
-0.706	-0.296	0.00647	0.734	-0.606	0.0225	0.786	-0.679			1.2	-0.551	2.76	-0.803	-0.548	0.722
-0.627	-0.661	-0.0382	0.802	-0.773	0.464	0.862	-0.545			1.03	-0.512	2.89	-0.839	-0.676	0.644
-0.757	-0.986	-0.0671	0.968	-0.809	0.525	0.668	-0.477			0.999	-0.0891	2.54	-0.715	-0.113	0.819
-0.567	-0.959	0.383	1.22	-0.409	0.0419	0.953	-0.681			1.07	-0.613	2.18	-0.841	-0.193	0.625
-0.332	-1.19	-1.09	1.11	-0.138	-0.0975	1.32	-0.742			1.04	-0.466	2.54	-0.58	0.00459	0.261
-0.479	-1.38	-0.804	1.49	-0.193	-0.216	1.44	-0.494			0.955	-0.784	2.62	-0.459	-0.0736	0.84
-0.335	-1.05	-1.19	1.66	-0.447	0.112	1.17	-0.453			1.02	-0.325	2.45	-0.49	-0.0361	0.693
-0.407	-1.11	-1.27	1.7	-0.897	0.735	0.898	-0.469			1.12	-0.0784	2.73	-0.475	-0.384	0.817
-0.377	-1.22	-0.361	1.39	-1.17	0.295	1.1	-0.76			1.2	-0.967	3.18	-0.271	-0.372	1.23
-0.453	0.151	-0.0426	1.66	-0.88	-0.216	1.66	-0.537			1.22	-0.438	3.34	-0.381	-0.436	0.718
-0.279	0.437	0.202	1.65	-0.655	0.286	1.3	-0.168			1.1	-1.06	3.15	-0.354	-0.68	1.2
-0.0953	0.402	-0.387	1.65	-0.322	0.869	0.926	-0.284			0.966	-0.402	3.16	-0.237	-0.328	1.38
0.00802	-0.0297	-0.396	2.39	-0.52	0.0529	1.26	-0.454			1.03	-1.27	3.17	-0.245	-0.274	1.39
-0.758	0.375	0.365	1.9	-0.753	-0.549	1.46	-0.59			1.03	-0.719	3.11	-0.2	-0.716	1.39
-0.365	-0.366	-0.947	1.53	-0.35	0.0578	1.77	-0.661			1.11	-0.634	2.79	-0.221	-0.234	1.39
0.0895	-0.452	-0.497	1.4	-0.0442	0.705	1.82	-0.31			1.25	-0.786	2.65	-0.364	-0.625	1.56
-0.287	-0.464	0.168	0.809	-0.511	0.824	1.29	-0.541			1.25	-0.0666	2.91	-0.464	-0.314	1.62
-0.426	-0.829	-0.466	1.18	-0.887	0.363	1.15	-0.74			1.52	-0.293	2.46	-0.488	-0.369	1.54
-0.529	-0.396	-0.615	1.56	-0.376	-0.0542	1.66	-0.316			1.46	-0.359	2.43	-0.462	-0.26	1.43
-0.395	-0.0752	0.671	1.85	-0.0584	0.3	2.12	-0.494			1.24	-0.527	2.74	-0.477	-0.518	1.5
-0.508	0.669	0.105	1.65	-0.271	0.807	1.27	-0.35			1.32	-1.08	2.73	-0.541	-0.355	1.15
-0.12	0.818	0.199	2.09	-0.681	0.56	0.712	-0.168			1.34	-0.512	3.01	-0.514	0.0503	1.05
-0.458	1.38	0.161	1.95	-1.02	0.24	1.39	-0.77			1.29	-1.12	2.88	-0.592	-0.343	1.53
-0.523	1.64	-1.46	2.21	-1.08	0.0317	2.02	-0.321			1.08	-1.29	3.18	-0.547	0.32	1.22
-0.154	1.58	-0.114	1.31	-1.11	-0.282	2.16	-0.743			1.19	-1.4	2.88	-0.568	0.0677	1.57
-0.228	2.17	0.718	1.76	-0.969	-0.227	2.05	-0.566			0.994	-1.11	2.81	-0.458	-0.305	1.14
-0.186	3.28	0.368	2.22	-0.777	-0.11	1.78	-0.804			0.963	-0.779	2.81	-0.447	-0.053	1.08
-0.467	1.64	0.0847	2.76	-0.455	0.209	1.71	-0.395			0.886	-0.995	2.71	-0.563	-0.0119	1.15
0.055	1.67	0.39	2.64	0.0515	0.421	1.78	-0.63			1.06	-0.702	2.83	-0.555	0.202	0.849
-0.0689	1.36	0.19	2.76	-0.583	-0.461	1.84	-0.0864			0.926	-1.13	2.64	-0.582	-0.0595	0.605
-0.42	1.9	0.892	1.98	-1.15	-1.05	1.64	-0.867			0.888	-1.36	2.93	-0.607	0.293	0.664
-0.273	1.93	0.182	2.56	-0.584	-0.736	1.65	-0.296			0.922	-1.44	2.91	-0.714	0.017	0.851
-0.15	1.95	0.0228	2.65	0.0658	-0.389	1.95	-0.684			0.972	-0.991	3.1	-0.675	-0.107	0.679
0.0844	1.83	0.763	2.25	-0.308	-0.217	1.58	-0.737			0.918	-1.1	3.26	-0.678	-0.177	0.0754
-0.746	1.65	-0.697	2.45	-0.896	-0.103	1.33	-0.793			0.886	-1.33	3.07	-0.743	-0.188	0.475
-0.0229	0.926	0.279	2.03	-0.773	-0.145	1.85	-0.917			0.864	-1.2	2.79	-0.71	-0.689	0.263
-1.09	0.958	0.232	2.36	-0.609	-0.00268	2.01	-0.511			0.809	-1.68	3.18	-0.748	-1.15	0.423
-0.582	0.982	0.613	2.51	-0.546	0.376	2.13	-0.553			0.877	-1.52	3.31	-0.745	-0.693	-0.288
-0.408	0.835	0.67	2.61	-0.262	0.0876	2.44	-1.09			0.701	-1.75	3.08	-0.827	-0.333	-0.245
-0.307	0.745	0.27	2.29	-0.0475	-0.445	1.77	-0.2			0.618	-0.72	2.86	-0.861	-0.686	-0.472
-0.338	0.671	0.0937	2.57	-0.201	-0.232	1.64	-0.835			0.806	-0.402	2.82	-0.841	-0.659	0.118
-0.471	-0.108	-0.053	2.27	-0.443	0.204	2.12	-0.387			0.778	-0.0923	3.37	-0.828	-0.897	-0.127
-0.638	-0.158	-0.541	2.57	-0.473	-0.134	1.89	-0.638			0.677	0.422	3.16	-0.919	-1.08	0.283
-0.435	0.161	0.138	2.63	-0.313	-0.0226	1.68	-0.444			0.586	-0.313	2.87	-0.89	-0.563	-0.328
-0.518	0.844	-0.0848	2.26	-0.626	0.816	1.89	-0.691			0.86	0.349	3.01	-1.15	-0.374	-0.214
-0.237	0.678	-0.218	1.91	-0.79	0.671	2.1	-0.421			0.819	-0.23	2.75	-1.02	-1.24	-0.324
-0.0958	0.068	-0.614	2.12	-0.0624	0.119	2.15	-0.892			0.764	-0.245	2.97	-0.806	-1.16	-0.0407
-0.567	-0.52	-0.465	2.01	0.488	-0.101	2.24	-0.443			0.753	0.232	3.09	-0.79	-0.84	-0.0896
-0.231	0.11	0.385	2.18	-0.15	0.0952	2.51	-0.693			0.828	-0.024	2.96	-0.805	-1.12	0.307
-0.0995	0.258	-0.198	1.7	-0.403	0.212	2.24	-0.492			0.666	0.809	2.86	-0.779	-0.478	0.0384
-0.726	0.767	0.28	2.44	0.057	0.0946	2.15	-0.224			0.547	0.989	3.19	-0.629	-0.234	-0.122
-0.568	0.251	-1.1	2.18	0.179	-0.332	2.61	0.48			0.684	0.341	2.91	-0.618	-0.647	0.0352
-0.825	0.661	-0.391	1.88	-0.2	-0.553	2.29	0.371			0.566	0.755	3.02	-0.52	-0.401	0.499
-0.439	0.425	0.03	1.62	-0.546	0.0983	1.46	-0.182			0.435	1.04	3.2	-0.631	-0.141	1.01
-0.29	0.7	0.61	1.38	-0.301	0.505	1.54	-0.0264			0.475	0.864	3.13	-0.58	-0.224	1.37
-0.593	0.328	0.642	0.931	-0.178	-0.0909	2.03	0.00932			0.47	0.474	3.24	-0.56	0.374	0.846
-0.607	0.163	-0.184	0.92	-0.0178	-0.371	1.81	0.692			0.501	0.493	3.14	-0.517	-0.0208	1.43
-0.688	0.207	-0.159	0.664	0.143	-0.307	1.2	0.725			0.497	0.871	2.99	-0.44	-0.115	1.33
-0.234	0.673	-0.712	0.873	-0.441	0.0113	0.996	0.567			0.423	1.11	2.81	-0.469	0.0177	0.962
-0.0172	0.464	0.582	0.778	-0.241	0.153	1.79	0.601			0.457	0.658	2.93	-0.34	-0.0535	1.4
-0.0703	-0.624	-0.296	0.287	0.654	-0.262	2.57	0.441			0.509	1.22	2.48	-0.326	0.133	1.04
-0.385	-0.287	0.796	0.526	0.972	-0.549	2.13	0.051			0.443	1.1	2.75	-0.413	0.339	0.695
-0.243	-0.103	-1.04	0.412	0.636	-0.0132	1.26	0.249			0.466	0.246	2.9	-0.321	-0.187	0.335
-0.171	-0.721	-0.941	0.203	0.447	0.459	1.03	0.362			0.283	0.0188	2.57	-0.303	-0.257	0.28
-0.357	0.284	-1.18	0.109	0.69	0.26	1.34	0.303			0.308	-0.154	2.96	-0.688	-0.0245	0.762
-0.415	0.338	-0.717	0.412	0.588	0.36	1.61	0.36			0.212	0.0253	3.18	-0.759	0.1	0.563
-0.182	-0.0561	0.459	0.608	0.135	0.626	1.86	-0.11			0.461	0.869	2.66	-0.582	-0.0854	0.883
-0.436	-0.396	0.431	0.389	-0.0774	0.537	2.21	0.14			0.385	0.388	2.88	-0.433	-0.608	0.7
-0.32	-0.702	0.0824	-0.126	-0.0548	0.449	2.02	-0.0135			0.39	-0.00768	2.79	-0.691	-0.158	1.31
-0.154	-0.3	0.0779	0.254	-0.0879	0.374	1.62	0.256			0.482	0.259	2.59	-0.766	-0.507	1.25
-0.455	-0.737	-0.0867	0.259	0.16	0.372	1.64	0.0835			0.601	0.477	2.54	-0.802	-0.54	0.875
-0.329	-0.527	-0.263	-0.172	0.621	0.823	1.58	-0.614			0.721	0.765	2.49	-0.992	-0.738	0.677
-0.239	-0.485	0.304	-0.134	0.985	1.05	1.59	-0.552			0.72	0.0488	2.72	-1.16	-0.361	0.252
-0.139	-0.0113	0.277	-0.581	0.972	0.658	2.09	-0.0291			0.602	0.32	2.77	-1.02	-0.262	0.743
-0.348	-0.824	0.467	-0.466	0.794	0.388	2.25	0.607			0.442	0.0557	2.85	-0.576	-0.0163	0.739
-0.408	-0.714	1.02	0.237	0.616	0.378	1.59	0.754			0.47	-0.0536	2.7	-0.519	-0.815	1.14
-0.249	-0.407	0.106	0.264	0.03	0.393	1.23	0.269			0.529	-0.174	2.73	-0.649	-0.172	0.576
-0.317	-0.426	0.126	-0.349	0.302	0.493	1.57	-0.0889			0.417	0.0563	2.87	-0.705	-0.562	0.326
0.239	-0.141	-0.44	-0.359	0.961	0.631	1.83	0.461			0.494	-0.572	2.73	-0.877	-0.294	0.38
0.0323	0.218	-0.638	-0.17	0.839	0.499	1.77	0.377			0.448	-1.07	2.49	-0.854	-0.344	0.685
0.148	0.52	-0.704	0.164	0.402	0.397	1.83	0.311			0.76	-0.408	2.51	-0.621	0.297	1.09
0.284	0.0366	-0.851	0.0448	0.0288	0.768	1.7	0.694			0.867	-0.0869	2.59	-0.676	0.303	1.58
-0.346	-0.42	-0.365	-0.101	-0.367	0.815	1.31	0.297			1.11	-0.678	2.3	-1.07	0.209	1.63
-0.336	-0.333	0.341	0.226	-0.298	0.185	1.93	0.341			0.979	-0.553	2.38	-1.26	-0.0931	1.72
-0.301	-0.37	-0.636	0.196	0.2	-0.15	1.98	0.0326			1.09	-0.465	2.86	-1.14	-0.0909	1.8
0.136	-0.387	-0.201	0.309	0.842	0.459	1.41	0.245			1.08	-0.574	2.75	-1.14	-0.0113	1.47
0.0951	0.0933	-0.692	0.155	0.776	1.18	1.61	0.424			1.03	-0.776	2.94	-1.17	0.0503	1.33
-0.0411	0.642	0.306	0.278	0.211	0.554	1.44	-0.257			0.966	-0.297	3.1	-0.904	-0.286	1.7
0.437	-0.843	0.101	-0.349	0.295	-0.119	0.767	0.242			0.989	-1.13	2.57	-0.928	0.144	1.75
0.412	-0.353	-0.713	-0.26	0.527	0.36	0.74	-0.291			1.05	-0.74	3.03	-0.979	0.252	1.72
0.331	-0.901	-0.731	0.0262	0.302	1.21	1.16	-0.404			0.93	-0.297	3.07	-0.82	0.0388	1.06
0.403	-0.432	0.916	-0.264	0.109	1.42	0.977	-0.085			1.01	-0.498	3.13	-0.633	0.121	1.98
0.029	-0.552	-1.01	-0.246	0.0921	1.27	0.921	0.0307			0.909	-0.751	3.14	-0.583	-0.436	1.22
-0.248	0.442	-1.02	-0.0238	0.0493	0.389	1.43	-0.105			0.847	-0.442	2.84	-0.528	-0.356	1.52
-0.236	0.522	-0.0635	0.178	0.153	0.193	1.08	-0.114			1.07	-1.11	2.72	-0.529	-0.784	0.949
-0.157	1.16	1	0.586	-0.37	0.644	0.313	0.288			0.812	-0.763	2.76	-0.364	-0.977	1.72
-0.0829	0.324	0.392	-0.0173	-0.659	0.353	0.0971	-0.731			0.867	0.319	2.75	-0.104	-0.725	1.35
0.303	0.248	0.462	0.389	-0.239	0.482	0.544	-0.339			1.07	0.424	2.85	0.113	-0.669	1.06
0.12	0.406	-0.463	0.142	0.244	0.754	1.03	-0.189			1.27	0.507	2.8	0.346	-0.299	1.23
0.21	0.539	-0.424	0.31	0.274	0.603	1.07	-1.02			1.12	0.257	3.09	0.378	-0.541	1.32
0.28	-0.245	1.08	0.406	0.2	0.00581	0.443	-0.536			0.926	0.126	2.79	0.374	-0.295	1.2
0.707	0.556	0.962	0.888	0.242	0.131	-0.112	-0.952			0.995	-0.0974	3.22	0.423	-0.0994	1.35
0.238	0.197	0.809	0.707	0.581	0.395	-0.431	-0.627			0.92	0.666	3.06	0.469	0.128	0.986
0.0169	0.442	0.153	0.968	0.297	0.689	-0.723	-1.1			0.884	0.898	2.93	0.443	-0.0772	1.35
0.336	0.425	0.731	0.0641	-0.505	0.639	-0.0185	-0.927			0.885	0.968	3.33	0.442	-0.484	1.44
0.388	0.251	0.102	-0.163	-0.0698	0.412	0.762	-0.938			0.862	0.133	2.94	0.331	-0.218	1.36
0.366	0.112	-0.293	-0.163	0.561	0.416	0.248	-1.09			0.668	1.13	3.05	0.213	-0.211	1.05
0.173	0.298	1.34	-0.538	0.563	0.191	0.139	-0.874			0.648	1.32	2.86	0.303	-0.332	1.18
0.534	0.0507	-0.0513	-0.13	0.604	-0.0255	0.612	-1.12			0.558	0.855	2.94	0.234	-0.525	1.34
0.392	-0.951	-0.191	-0.105	0.642	0.0252	-0.0204	-0.818			0.55	1.57	2.82	0.374	-0.426	1.39
0.721	-0.43	0.456	-0.192	0.601	0.265	-0.11	-0.867			0.545	1.38	2.76	0.231	-0.362	1.12
0.604	0.591	0.109	-0.0347	0.383	0.533	0.944	-0.983			0.583	1.08	2.44	0.324	-0.26	1.53
0.28	0.653	-0.637	-0.298	-0.00741	0.766	1.18	-1.02			0.662	0.872	2.56	0.381	-0.407	1.2
0.395	0.16	-0.0386	0.246	0.352	0.394	0.998	-0.732			0.564	0.341	3.13	0.635	-0.315	1.68
0.647	0.238	-0.286	0.0751	0.743	-0.0362	1.33	-1.48			0.417	0.455	2.89	0.599	-0.372	1.15
0.523	0.496	-0.646	0.235	0.308	0.317	0.87	-0.871			0.389	0.6	2.94	0.574	-0.139	1.32
0.61	-0.48	-0.367	0.315	-0.243	0.264	-0.043	-0.814			0.461	1.1	2.89	0.559	-0.472	1.15
0.319	-0.0675	-0.669	0.472	0.118	0.102	-0.128	-1.23			0.399	0.829	2.78	0.283	0.224	1.03
0.355	0.999	-0.527	0.0576	0.694	0.487	0.127	-1.01			0.333	0.417	2.8	0.12	0.019	1.45
0.996	0.585	0.0815	-0.0138	0.471	0.642	-0.333	-0.751			0.404	-0.00974	2.69	0.162	-0.465	1.83
1.11	0.656	-0.904	0.0311	0.102	0.382	-0.446	-1.05			0.467	0.498	2.69	0.301	-0.395	1.22
0.761	0.116	-0.647	-0.106	-0.174	0.231	0.212	-1.53			0.271	0.525	2.63	0.261	0.0598	1.67
0.525	0.306	-0.865	-0.0874	-0.671	0.371	0.321	-0.594			0.383	0.436	2.87	0.346	0.426	1.2
0.474	0.3	-0.399	-0.337	-0.737	0.396	0.289	-1.13			0.34	0.0695	3.07	0.412	0.395	1.27
0.543	0.0579	-0.702	-0.291	-0.436	0.207	0.461	-0.562			0.544	0.766	2.76	0.301	0.827	1.08
0.455	0.421	-0.546	-0.487	-0.203	0.302	0.36	-0.919			0.521	1.35	2.86	0.358	0.117	1.26
0.761	-0.153	-0.887	0.0265	-0.275	0.577	-0.376	-0.722			0.439	0.838	2.88	0.295	0.33	0.856
0.959	1.25	0.543	0.364	-0.534	0.096	-0.76	-0.593			0.588	0.495	3.36	0.423	0.432	0.949
0.648	0.389	-0.212	0.655	-0.202	0.318	-0.628	-0.775			0.573	0.351	2.62	0.637	0.61	0.794
0.63	1.28	0.197	0.618	0.202	0.993	-0.426	-0.994			0.409	1.04	2.76	0.769	0.755	1.07
0.104	0.549	-0.465	0.529	-0.104	0.634	-0.1	-0.489			0.354	0.555	2.96	0.836	0.395	1.31
0.339	0.891	-0.857	0.0105	0.0551	0.204	-0.236	-0.491			0.681	0.133	3.01	0.728	0.397	1.54
0.417	0.64	-0.331	-0.144	0.641	0.556	-0.368	-0.653			0.798	0.237	3.4	0.665	0.785	1.21
0.633	1.89	-0.664	-0.0971	-0.0146	0.869	0.0201	-0.334			0.9	-0.108	3.13	0.648	-0.0658	0.633
0.808	2.1	-0.592	0.583	-0.825	0.568	1.1	-0.735			0.745	0.238	3.03	0.595	0.396	1.03
0.621	1.18	-1.4	0.0853	-0.781	0.0323	1.26	-0.69			0.746	-0.191	2.85	0.652	0.293	0.817
0.76	1.92	-1.19	0.331	-0.651	0.241	0.425	-0.62			0.682	-0.687	3.02	0.737	0.727	0.489
0.947	1.66	-0.965	0.355	-0.951	0.771	0.0879	-0.284			0.826	-0.0792	2.71	0.911	0.0217	0.469
0.924	1.15	0.464	0.139	-0.765	0.838	0.312	-0.672			0.683	-0.852	2.7	0.895	0.45	0.389
0.775	0.996	-0.832	0.15	-0.206	0.26	0.839	-0.101			0.643	-0.615	2.75	0.869	0.556	0.43
0.658	0.74	-0.56	0.0248	-0.0827	-0.162	0.618	-0.709			0.654	0.315	2.79	0.934	0.339	0.876
0.485	1.23	0.63	-0.075	-0.145	-0.339	0.00345	-0.884			0.666	0.363	2.72	0.81	0.21	-0.000222
0.877	0.7	-0.0246	-0.253	-0.0927	0.0688	0.772	-1.27			0.554	-0.539	3	0.793	0.301	0.677
0.487	1.05	-0.168	0.108	-0.376	0.67	1.59	-1.12			0.542	0.229	3.03	0.716	0.106	0.013
0.615	1.5	-0.321	-0.167	-0.581	0.936	1.18	-0.857			0.383	-0.0532	2.88	0.67	-0.253	0.172
1.04	1.34	-0.28	0.0328	-0.697	0.977	0.181	-0.734			0.433	-0.345	2.73	0.637	-0.378	0.0242
1.11	1.16	0.043	0.0992	-1.42	1.29	-0.293	-0.572			0.579	-0.251	2.96	0.601	0.338	-0.156
0.539	1.16	0.125	-0.0249	-1.93	0.741	-0.0278	-0.762			0.616	-0.292	3.09	0.639	0.158	-0.056
0.682	0.868	1.16	-0.308	-1.07	0.0855	0.353	-0.702			0.533	0.00759	3.26	0.722	0.379	0.0611
0.569	1.17	0.304	-0.446	-0.47	0.248	0.575	-0.857			0.639	0.199	2.89	0.764	-0.269	-0.693
0.159	1.02	0.141	0.648	-0.946	1.14	0.56	-1.18			0.72	-0.0953	3.05	0.729	0.642	0.0722
0.59	0.681	0.277	0.0717	-1.16	1.21	0.39	-0.635			0.613	-0.583	2.9	0.719	0.492	-0.462
0.866	1.42	0.452	-0.415	-0.874	0.934	0.213	-0.996			0.647	-0.292	2.49	0.671	0.445	-0.473
0.564	0.277	-0.268	0.22	-0.621	1.35	0.24	-0.27			0.521	-0.494	2.72	0.718	0.207	-0.348
0.564	1.04	0.373	0.0231	-0.46	1.14	-0.0107	-1.32			0.447	-0.883	2.61	0.924	0.539	-0.756
0.624	0.331	0.561	-0.165	-0.0537	0.264	0.176	-0.714			0.665	-0.267	2.9	0.899	0.1	-0.523
0.918	0.795	0.167	-0.115	-0.554	-0.159	0.915	-0.737			0.802	-0.436	2.8	0.807	0.357	-0.42
0.864	0.0853	-0.205	-0.169	-1.06	0.271	0.708	-0.332			1.1	-1.07	2.98	0.805	-0.216	-0.252
1.18	0.633	0.0159	-0.0207	-0.552	0.259	0.0127	-0.87			1.29	-1.15	3.58	0.81	-0.196	0.000855
0.554	1.64	-0.138	-0.492	-0.175	0.134	0.112	-0.305			1.19	-0.759	3.52	0.766	0.928	-0.414
0.552	1.74	0.799	-0.937	-0.422	0.398	0.355	-0.781			1.25	-0.951	3.33	0.693	-0.165	-0.518
0.741	2.4	-0.161	-0.982	-0.259	0.61	0.437	-0.671			1.27	-0.718	3.13	0.636	-0.0211	-0.461
0.552	1.85	0.198	-0.69	-0.0391	0.305	0.17	-0.573			1.15	-0.494	3.27	0.572	0.128	0.135
1.48	1.81	0.131	-0.358	-0.117	0.3	-0.0547	-0.661			1.4	-0.162	3.35	0.535	-0.458	0.145
1.54	2.07	0.929	-0.627	0.165	0.765	-0.00865	-0.805			1.38	-0.353	3.2	0.531	0.1	-0.222
1.13	2.13	0.246	-0.704	0.575	0.441	-0.0698	-1.02			1.26	-0.0356	2.94	0.428	0.0448	-0.145
1.11	1.95	0.416	-0.552	0.0671	0.657	0.356	-0.647			1.27	-0.239	2.94	0.548	0.15	-0.119
1.09	1.43	0.437	-0.389	-1.12	1.06	1.07	-0.339			1.12	-0.434	2.96	0.902	0.0599	-0.411
1.33	0.623	-0.00696	-0.0294	-1.15	0.407	0.757	-0.881			1.27	-0.453	3.08	1.46	0.129	-0.234
1.14	0.471	0.272	-0.209	-0.504	0.42	0.151	-0.791			1.26	-0.567	2.82	1.73	0.0647	-0.293
0.772	0.0014	-0.525	-0.498	-0.355	1.62	0.782	-0.606			1.26	-0.326	2.76	1.74	-0.0919	-0.411
1.3	0.47	-0.233	-0.774	-0.745	2.07	1.48	-0.928			1.26	-1.02	2.88	1.78	-0.208	-0.159
1.21	-0.00584	-0.343	-0.49	-0.908	1.05	1.07	-0.163			1.37	-0.762	3.09	1.73	-0.112	0.125
1.08	-0.121	0.865	-0.899	0.0197	-0.112	0.603	-0.541			1.36	-0.731	3.03	1.5	-0.33	-0.00649
1.09	0.2	-0.68	-0.708	0.72	0.336	0.852	-0.688			1.52	-1.43	2.73	1.5	-0.634	0.492
0.846	0.446	0.0182	-1.27	0.73	1.42	0.992	-0.411			1.39	-1.34	2.62	1.35	-0.245	0.349
0.998	0.368	-0.182	-0.918	0.612	1.95	0.576	-0.445			1.3	-1.02	2.94	1.37	-0.158	0.601
1.02	0.302	-0.969	-0.846	-0.0561	1.59	0.22	-0.231			1.39	-0.789	3.23	1.3	-0.333	0.611
1.49	0.291	0.0631	-1.12	-0.623	0.816	0.321	-0.388			1.34	-1.31	2.9	1.14	-0.385	0.406
1.11	0.176	-1.63	-1.05	-0.363	0.193	0.472	-0.296			1.31	-1.08	2.64	1.14	0.168	0.57
1.03	0.916	-0.798	-1.07	-0.463	0.537	0.212	-0.247			1.24	-0.776	2.65	1.06	0.0708	0.62
0.953	0.829	-1.24	-0.837	-0.71	1.2	0.212	-0.334			1.28	-0.556	2.96	0.961	0.334	0.197
0.938	0.326	-1.08	-1.36	-0.356	1.33	0.828	-0.369			1.37	-0.029	3.47	0.957	0.118	0.482
1.04	0.349	0.0172	-1.15	0.0336	1.3	0.906	-0.466			1.25	-0.293	3.26	0.812	0.454	0.612
1.07	1.6	-1.27	-0.698	0.101	1.15	0.721	-0.318			1.11	-0.969	3.04	0.553	0.264	0.702
1.25	1.77	-0.894	-0.506	-0.126	0.938	0.971	-0.529			1.17	-0.886	3.16	0.307	0.237	0.866
1.33	2.15	-0.764	-0.197	-0.274	0.833	0.943	-0.514			0.991	-0.995	2.84	0.427	0.529	0.686
1.07	1.97	-0.717	-0.631	0.278	1.04	0.9	-0.59			0.994	-1.44	2.74	0.558	0.172	0.538
1.09	2	-0.357	-0.204	0.343	0.937	1.08	-0.68			1.02	-0.988	2.93	0.384	0.278	0.286
1.45	1.7	-1.02	-0.436	-0.111	0.658	0.55	-0.682			1.06	-0.85	2.78	0.5	0.0225	0.406
1.56	0.956	-0.743	-0.249	0.0554	0.00362	0.0697	-0.593			0.916	-0.776	2.85	0.489	0.327	0.761
1.48	1.88	-1.53	-0.583	0.0431	0.345	0.367	-0.621			1.05	-0.744	2.67	0.34	-0.00854	0.484
0.916	1.8	-0.506	-0.475	-0.000378	1.01	0.601	-0.791			1.09	-0.971	2.44	0.447	-0.563	0.676
0.98	1.28	-0.759	-0.297	0.38	0.692	0.532	-0.579			0.857	-0.891	2.51	0.409	-0.0291	1.16
1.37	1.17	-1.2	-0.618	0.536	0.462	0.638	-0.526			1.02	-0.982	2.43	0.709	-0.668	1.18
1.47	1.46	-1.73	-0.411	-0.0849	0.851	0.666	-0.96			0.931	-0.861	2.06	0.987	-0.537	1.61
1.18	0.694	-1.91	-0.339	-0.494	0.7	0.931	-0.201			0.969	-0.653	2.22	1.29	-0.137	1.82
1.23	0.418	-1.13	-0.801	0.399	0.245	1.59	-0.339			0.954	-0.803	1.93	1.06	-0.331	1.83
1.76	0.973	-1.97	-0.34	0.465	0.315	1.7	0.0107			0.927	-1.18	2.06	0.907	-0.487	1.59
1.56	1.04	-2.14	-0.323	-0.415	0.589	1.37	-0.314			0.968	-0.675	1.77	0.77	-0.144	1.98
1.38	1.17	-0.933	-0.467	-0.522	1	1.25	-0.51			1.09	-0.881	1.59	1.04	0.26	1.66
1.27	0.895	-0.763	-0.482	0.127	0.912	1.28	-0.88			1.36	-0.951	1.62	1.01	-0.0493	1.63
1.57	1.07	-1.14	-0.553	0.442	0.462	0.999	-0.876			1.73	-1.63	1.73	0.909	-0.709	1.45
1.45	1.49	-1.94	-0.903	0.162	0.261	0.83	-0.414			1.76	-1.19	1.61	0.803	-0.681	1.64
1.89	1.6	-1.31	-0.495	0.214	0.28	1.02	-0.357			1.7	-1.07	1.23	0.865	-0.361	1.41
1.79	1.39	-1.06	-1.13	0.35	0.549	0.665	-0.452			1.69	-1.07	1.41	1.06	-0.482	1.21
2.03	0.457	-0.751	-0.616	-0.204	0.637	0.273	-0.133			1.64	-0.886	1.4	1.05	-0.108	1.22
1.51	0.769	-1.6	-0.332	-0.034	0.143	0.457	-0.268			1.49	-1.51	1.32	1.09	-0.31	1.26
1.76	1.08	-1.31	-0.706	0.125	-0.201	0.971	-0.533			1.54	-0.928	1.31	1.11	-0.223	1.06
1.77	0.729	-1.59	-0.789	-0.225	0.142	1.54	-0.551			1.47	-1.11	1.4	1.05	0.0929	1.23
1.99	0.532	-1.71	-0.451	0.0798	0.746	1.56	-0.35			1.57	-1.03	1.36	0.721	0.123	1.1
2.02	-0.204	-1.41	-0.39	0.0499	0.967	0.709	-0.458			1.61	-1.01	0.827	0.836	-0.364	1.23
1.69	-0.552	-2.35	-1.02	-0.474	0.937	0.384	-0.407			1.48	-0.787	0.868	0.685	-0.068	1.35
1.79	-0.751	-2.09	-1.02	-0.565	0.672	1.13	-0.143			1.45	-0.76	0.819	0.577	-0.671	1.53
2.06	-0.176	-0.947	-1.25	-0.463	1.37	1.36	-0.312			1.57	-0.863	0.873	0.697	-0.45	1.34
2.06	-0.0147	-0.46	-1.29	-0.801	2.12	0.89	-0.195			1.64	-0.722	0.774	0.716	-0.6	1.29
2.09	-0.419	-1.26	-1.15	-1.32	1.73	0.478	-0.462			1.76	-0.59	0.625	0.675	-0.303	1.09
2.37	-0.308	-0.362	-1.3	-0.645	1.12	0.714	-0.851			1.82	-1.2	0.869	0.685	-0.391	1.02
2.45	-0.331	-1.44	-0.846	0.257	1.13	1.32	-0.32			1.72	-0.974	0.595	0.622	-0.515	0.923
2.39	-0.905	-0.835	-0.622	-0.53	1.34	1.58	0.18			1.72	-1.01	0.822	0.591	-0.699	0.43
2.29	-0.663	-0.921	-0.593	-0.802	1.32	1.12	-0.0486			1.95	-1.04	0.473	0.729	-0.476	0.965
1.57	-0.548	-0.566	-0.508	0.0608	1.37	0.848	-0.216			2	-0.568	0.532	0.903	-0.29	0.722
2.04	0.358	-0.873	-0.812	0.5	1.63	0.837	-0.319			1.67	0.261	0.525	0.988	-0.361	0.858
2.09	0.214	-1.01	-0.366	0.363	1.24	0.86	0.335			1.84	0.0644	0.44	0.946	-0.54	1.29
2.09	0.137	-1.66	-0.473	0.615	1.22	1.62	-0.113			1.92	-0.175	0.621	0.819	-0.468	1.14
2.58	-0.249	-1.76	-0.871	0.859	1.96	2	-0.238			1.67	-0.00959	0.595	0.801	-0.0703	1.17
2.1	0.499	-1.38	-0.202	0.257	1.91	1.36	-0.195			1.79	0.672	0.626	0.735	-0.361	1.2
1.71	0.778	-0.692	0.404	0.158	1.85	0.747	0.118			1.93	1.78	0.587	0.761	0.098	0.71
1.62	0.1	-1.12	0.175	0.729	2.09	0.883	-0.145			1.85	1.98	0.546	0.834	-0.0437	1.26
1.72	0.743	-0.919	-0.394	0.588	2.18	0.769	-0.59			1.76	1.24	0.558	0.971	-0.491	0.506
2.06	1.35	-0.127	0.115	-0.0586	1.19	1.05	-0.212			1.88	1.59	0.304	0.878	0.128	0.63
1.86	1.67	-1.71	-0.0568	-0.0979	0.909	1.86	-0.421			1.73	1.13	0.349	0.842	-0.409	0.617
1.49	1.35	-0.988	-0.689	0.666	2.27	1.68	-0.208			1.77	0.541	0.239	0.832	0.177	0.853
1.71	1.33	-0.6	-0.482	0.859	2.74	1.33	-0.216			1.86	0.804	0.152	0.935	-0.114	0.826
1.57	0.548	-0.506	-0.316	0.16	2	1.57	-0.716			1.95	0.657	0.0244	1.12	-0.306	0.682
1.87	0.868	-0.196	-0.596	-0.382	1.15	1.79	-0.5			1.69	0.634	0.123	1.09	0.157	0.927
1.66	0.723	-0.863	-1.05	-0.346	1.02	1.37	-1.08			1.71	0.317	0.319	1.06	0.0198	0.747
1.7	0.648	-0.325	-1.26	-0.0754	1.45	1.38	-0.768			1.67	0.509	0.251	1.05	-0.461	0.638
2.01	0.183	-1.21	-0.878	-0.341	1.03	1.69	-0.808			1.55	0.0318	0.3	1.05	-0.274	0.8
1.72	0.21	-0.996	-1.15	-0.635	0.584	1.49	-1.19			1.59	-0.107	0.419	1.03	-0.342	1.48
1.69	0.937	-0.837	-0.982	-0.442	1.28	1.42	-0.878			1.46	0.691	0.313	0.917	-0.129	1.04
1.44	0.854	0.407	-0.653	0.0437	1.35	0.917	-0.867			1.38	0.028	0.0479	0.882	-0.691	0.785
1.3	0.777	-0.0471	-0.479	0.411	0.814	0.577	-0.448			1.32	0.324	0.182	0.866	-0.56	1.33
1.81	0.752	0.257	-0.708	0.275	0.388	0.844	-0.725			1.45	0.358	0.264	0.843	-0.78	0.996
2.01	0.605	1.36	-0.459	0.497	0.632	0.897	-0.818			1.83	0.193	0.425	0.833	-0.544	0.965
1.9	0.516	0.462	-0.747	1.21	0.666	0.649	-0.847			1.86	0.605	0.616	0.785	-0.594	0.966
1.46	0.618	0.418	-0.453	0.669	0.0216	1.01	-1.2			2.04	0.0309	0.719	0.804	-0.141	0.883
1.71	0.635	-0.412	-0.369	-0.176	0.0796	0.996	-0.227			2.17	-0.191	0.633	1.08	-0.317	0.915
1.79	0.151	0.552	-0.351	0.387	0.302	0.632	-1.31			2.15	0.123	0.512	1.12	0.112	1.1
1.68	0.369	0.186	-0.15	0.929	0.076	1.37	-0.739			2.11	0.468	0.553	1.01	-0.244	0.779
2.03	0.945	-0.234	-0.0524	0.0846	0.135	1.83	-1.09			2.23	0.265	0.483	0.996	-0.165	0.997
1.72	0.688	0.567	-0.408	-0.591	0.626	1.24	-0.958			2.19	-0.074	0.383	0.974	-0.313	0.834
1.67	0.315	0.272	-0.0133	-0.515	0.861	1.13	-0.803			1.9	0.143	0.692	0.867	-0.542	0.849
1.94	0.776	-0.593	-0.0177	-0.07	0.113	1.52	-1.14			1.76	0.0841	0.062	0.789	0.128	1.09
1.61	0.407	0.316	-0.151	0.412	-0.19	1.53	-0.755			1.76	-0.0745	0.18	0.708	0.111	1.06
1.99	0.917	0.537	0.53	0.337	0.146	1.21	-0.61			1.81	0.0963	-0.00676	0.651	0.0903	1.14
1.97	1.14	-0.691	-0.185	-0.0391	0.333	0.83	-0.877			1.61	-0.185	0.317	0.661	0.144	1.43
1.67	0.924	-0.0139	0.12	-0.571	0.276	1.17	-0.733			1.58	0.585	0.263	0.733	0.539	0.789
1.36	0.945	-0.985	-0.138	-0.553	0.767	1.92	-0.763			1.49	0.67	0.307	0.647	0.251	0.956
1.81	0.706	-0.187	0.119	0.0278	1.11	2.2	-0.951			1.54	0.371	0.01	0.753	-0.25	1.32
1.97	0.687	-0.432	0.153	0.429	0.517	1.78	-0.729			1.54	0.697	-0.0147	0.784	0.189	0.752
1.9	-0.0581	0.538	-0.166	0.124	0.266	1.45	-0.465			1.57	0.355	0.196	0.986	0.277	1.1
1.94	0.323	-0.989	-0.198	-0.443	0.211	1.87	-1.29			1.49	0.928	0.101	1.09	0.586	1.77
2.42	0.636	-2.46	-0.477	-0.699	-0.0398	2.17	-0.813			1.48	1.02	-0.056	1.14	0.482	0.836
1.4	0.355	-1.42	-0.555	-0.602	0.122	1.38	-0.984			1.42	0.689	0.186	1.33	0.394	1.7
1.84	0.617	-1.12	-0.458	0.0138	0.642	1.21	-0.841			1.38	0.31	-0.123	1.24	0.351	1.17
1.31	0.406	-1.49	-0.595	0.79	0.27	1.75	-1.29			1.27	0.498	0.0917	1.19	0.0133	1.75
1.58	0.302	-0.923	-0.416	1.15	-0.0717	1.78	-1.18			1.07	0.524	-0.298	1.3	0.223	1.6
1.5	0.328	-1.75	-0.912	0.589	0.373	1.73	-0.698			1.1	0.544	-0.12	1.29	-0.0624	1.76
2.01	-0.426	-0.621	-1.17	0.0757	0.716	1.55	-0.861			1.01	0.42	-0.138	1.11	0.0361	1.51
2.24	0.119	-0.204	-0.791	0.236	0.348	1.23	-0.38			1.03	0.454	-0.0585	1.28	-0.184	1.48
2.17	0.198	0.0554	-0.649	0.456	0.234	1.64	-0.928			0.95	0.726	0.0446	1.33	-0.158	1.35
1.93	0.00876	-0.29	-0.474	0.022	0.562	2.51	-0.548			0.891	0.642	-0.0506	1.31	-0.0708	2.03
1.59	0.289	-0.145	-0.453	0.257	0.186	2.43	-0.863			0.953	-0.329	-0.0776	1.01	0.322	1.19
2.1	-0.274	-0.942	-0.758	1.13	-0.381	2.24	-0.316			0.929	0.332	-0.165	1.06	-0.327	0.917
2.32	0.449	0.225	-0.317	1.42	0.367	2.76	-0.987			1.07	0.55	0.133	1.14	-0.0031	0.679
1.76	0.423	-0.00234	-0.689	1.09	1.32	2.61	-1.14			0.997	0.285	0.181	1.03	0.261	0.761
2.64	0.241	0.126	-0.388	0.775	1.14	2.11	-0.819			1.03	0.12	-0.226	1	-0.212	0.786
2.24	-0.0179	0.889	-0.865	0.794	0.322	2.07	-0.854			1.04	-0.0297	0.0595	0.779	0.364	1.18
2.53	0.548	0.38	-1.09	0.559	-0.0185	1.77	-1.45			1.1	0.111	-0.193	0.928	-0.173	1.28
2.85	0.725	0.146	-0.996	0.213	0.397	1.75	-0.72			1.09	0.0197	-0.0436	0.87	0.48	1.38
2.59	0.125	0.364	-0.631	0.373	1.22	2.31	-1.02			1.12	0.259	-0.283	0.735	-0.0825	1.24
2.46	0.109	-0.375	-0.877	0.494	1.37	2.35	-0.854			1.15	0.277	-0.207	0.647	-0.112	0.646
2.34	0.117	0.565	-0.611	-0.0205	0.323	1.97	-1.4			1.12	-0.704	-0.137	0.671	-0.463	0.859
2.53	0.173	-0.405	-0.205	-0.345	0.0915	2.08	-1.22			1.03	0.576	-0.263	0.726	-0.167	0.543
2.27	0.327	-0.347	-0.661	0.322	0.853	2.32	-0.966			1.1	0.534	-0.31	0.88	0.191	0.759
2.47	0.427	-0.328	-0.882	0.269	1.65	2.05	-1.22			1.06	0.653	-0.108	0.754	0.0641	0.685
2.36	0.149	-0.111	-1.03	-0.386	1.91	1.7	-1.59			0.763	0.665	-0.589	0.648	-0.0176	0.488
2.24	0.48	0.473	-0.317	0.111	1.54	2.22	-1.02			0.978	0.723	0.237	0.486	-0.00675	0.442
2.12	-0.091	-0.00332	0.401	0.888	0.862	2.43	-1.55			0.921	1.2	-0.11	0.403	0.285	-0.164
2.53	-0.12	0.716	0.00102	0.766	0.769	2.06	-1.47			0.945	0.77	-0.258	0.468	0.242	-0.273
2.82	-0.485	1.14	0.18	0.291	1.1	2.16	-0.761			1.01	1.08	-0.42	0.47	-0.347	0.178
1.8	0.443	0.845	0.138	0.161	0.705	1.88	-1.11			0.978	0.78	-0.242	0.445	-0.229	-0.0747
1.89	0.14	0.195	0.43	0.384	0.408	1.19	-1.08			1.22	1.14	-0.425	0.437	-0.0558	0.25
2.17	-0.151	-0.458	-0.389	0.472	0.778	1.25	-0.552			1.48	1.22	-0.424	0.414	-0.399	-0.0111
3.02	0.0423	1.26	-0.447	0.202	1.45	1.44	-1.38			1.6	1.3	-0.113	0.467	-0.483	0.0729
2.33	-0.159	1.19	0.0491	-0.3	1.86	1.27	-0.707			1.56	0.965	-0.107	0.449	-0.632	-0.24
2.51	-0.628	0.95	0.485	-0.185	1.94	1.27	-0.883			1.48	1.32	-0.116	0.422	-0.424	0.109
2.19	-1.05	-0.0372	-0.988	0.526	1.93	1.42	-1.01			1.44	0.718	-0.205	0.411	-0.48	-1.03
2.33	-1.09	0.00379	-0.955	0.637	1.78	1.31	-1.11			1.54	0.328	-0.229	0.543	-0.197	-0.388
1.97	-1.43	0.208	-1.26	0.233	1.85	0.877	-1.04			1.48	0.504	0.108	0.57	-0.615	-0.32
1.98	-1.62	0.379	-0.858	-0.137	2.14	1.35	-1.26			1.64	0.975	-0.0792	0.514	-0.0787	0.00815
1.97	-0.836	0.322	-1.12	-0.278	1.8	1.72	-1.1			1.74	0.254	-0.121	0.412	0.104	-0.193
2.22	-0.14	0.859	-1.4	-0.124	1.45	1.3	-0.966			1.82	0.318	0.105	0.312	0.401	-0.52
1.79	-0.612	0.647	-0.836	0.187	1.14	0.979	-0.838			1.69	0.147	-0.0749	0.402	1.02	-0.473
2.21	-0.748	0.0573	-0.835	-0.139	0.806	1	-1.34			1.64	0.496	-0.08	0.52	1.18	-0.514
2.01	-0.872	0.474	-0.542	-0.7	0.913	0.943	-0.776			1.71	0.153	-0.203	0.472	1.04	-0.372
2.04	-0.978	-0.256	-0.76	-0.251	0.744	1.16	-1.11			1.52	0.0198	-0.308	0.486	0.719	-0.436
2.11	-1.09	0.0828	-0.306	0.373	0.56	1.54	-1.32			1.52	-0.428	-0.0241	0.365	0.903	-0.323
1.89	-1.12	-0.198	-0.154	-0.362	1.27	0.889	-0.912			1.39	0.32	-0.224	0.0558	0.909	-0.364
2.41	-1.19	-0.153	-0.172	-0.95	1.64	0.232	-1.06			1.32	0.514	0.155	0.231	0.978	-0.767
2.58	-0.628	0.373	-0.53	-0.305	1.07	0.681	-1.04			1.19	0.229	-0.0617	0.403	0.926	-0.327
1.76	-0.612	-0.534	-0.536	0.242	0.507	1.12	-1.31			1.32	0.427	-0.124	0.502	0.612	-0.226
1.92	-0.126	-0.218	-0.765	-0.148	1.03	1.5	-0.507			1.23	-0.287	0.00657	0.497	1.1	-0.272
1.98	-0.318	-0.374	-0.528	-0.857	1.47	2.41	-0.712			1.23	0.171	-0.436	0.413	1.73	-0.514
1.59	0.235	-0.279	-0.329	-0.778	1.11	2.43	-1.04			1.14	-0.405	-0.138	0.252	1.86	-0.391
1.64	-0.472	0.365	-0.845	-0.0498	0.794	2.18	-0.227			1.1	-0.105	-0.382	0.405	1.39	-0.327
1.94	-0.126	0.042	-0.558	0.244	1.13	2.69	-0.717			1.23	-0.00365	-0.0557	0.418	0.939	-0.24
1.89	-0.584	-0.155	-0.486	0.0585	0.72	2.86	-0.808			1.25	-0.651	-0.486	0.461	1.55	-0.529
1.84	-0.961	0.144	-0.57	-0.175	0.195	3.25	-0.353			1.47	-0.129	-0.391	0.468	1.24	-0.269
2.03	-0.332	0.68	-0.288	-0.00655	0.392	4.17	-0.735			1.41	0.16	-0.329	0.494	1.05	-0.381
2.11	0.112	0.202	-0.375	0.176	0.531	4.18	-1.03			1.36	-0.484	-0.337	0.404	1.4	-0.237
1.95	-0.381	0.426	-0.377	-0.303	-0.085	4	-0.743			1.46	-0.411	-0.387	0.327	1.12	-0.887
2.26	0.338	0.984	-0.419	-0.523	-0.393	4.26	-1.32			1.52	-0.559	-0.411	0.45	1.48	-0.36
1.68	0.401	1.42	-0.0566	-0.0207	0.194	4.1	-0.701			1.57	-0.275	-0.293	0.49	1.09	-0.424
2.24	0.265	0.0367	0.0013	0.159	0.698	3.23	-0.688			1.68	-0.886	-0.0449	0.434	1.27	-0.555
1.69	0.0761	-0.195	-0.197	-0.201	1.14	3.02	-0.885			1.33	0.119	-0.317	0.428	0.595	-0.637
2.15	0.031	0.608	-0.613	-0.0349	1.65	3.59	-0.686			1.43	-0.2	-0.452	0.47	1.12	-0.919
1.79	-0.102	0.509	-0.921	0.451	1.94	3.8	-0.801			1.66	-0.551	-0.258	0.491	0.816	-0.666
2.04	0.229	0.367	-0.546	0.674	2.14	3.4	-0.653			1.8	-0.136	-0.175	0.333	0.813	-0.837
1.55	0.294	1.03	-0.507	0.627	2.35	3.07	-0.693			1.99	-0.725	-0.0769	0.274	1.17	-1.14
1.99	0.476	0.272	-0.625	0.346	2.59	3.1	-0.696			1.7	-0.347	0.187	0.396	0.977	-1.39
1.79	1.27	0.4	-0.537	0.000613	2.68	3.11	-0.695			1.72	-0.886	0.0759	0.381	0.47	-0.963
1.56	0.64	0.195	-0.528	-0.0424	2.55	3.34	-0.301			1.8	-0.163	0.0241	0.36	0.465	-0.938
1.78	1.17	-0.0984	-0.357	0.104	2.1	2.96	-0.751			1.76	0.283	-0.272	0.391	0.249	-1.07
1.95	0.348	0.619	-0.539	0.624	1.07	2.6	-0.345			1.7	0.855	-0.12	0.456	0.784	-0.813
1.71	1.16	0.623	-0.869	1.03	1.39	2.81	-0.176			1.63	0.155	0.0208	0.547	0.477	-0.628
1.49	0.907	0.325	-0.45	0.499	2.35	3.5	0.472			1.68	0.121	0.0939	0.631	1.19	-0.891
1.2	1.07	-0.0408	-0.554	0.03	2.62	3.31	0.563			1.51	1.19	0.272	0.704	0.736	-0.758
1.69	0.765	-0.437	-1.07	0.384	2.22	2.46	0.629			1.49	0.981	0.165	0.642	0.54	-0.512
1.65	0.721	-0.857	-0.879	0.83	2.33	2.26	0.607			1.49	1.47	-0.0787	0.895	0.312	-1.34
1.07	0.338	-0.402	-0.67	0.475	2.79	2.51	-0.117			1.47	2.27	-0.236	1.12	0.555	-0.676
1.2	0.36	0.0777	-0.698	0.621	2.93	2.7	0.404			1.63	1.74	0.105	1.12	0.354	-0.903
1.74	-0.274	0.187	-0.797	1.38	2.39	2.33	0.216			1.64	1.58	0.159	1.14	-0.522	-0.842
1.12	0.511	0.238	-0.821	1.2	2.37	2.53	0.761			1.67	1.94	0.124	1.1	-0.174	-0.552
1.4	1.75	0.554	-0.624	0.747	2.52	3.37	0.226			1.72	2.18	-0.0347	1.09	-0.111	-0.00677
1.4	2.46	-0.0265	-0.821	1.05	2.18	3.45	0.279			1.7	1.17	0.132	1.21	-0.581	-0.266
1.71	2.81	-0.241	-0.882	0.93	2.29	2.76	0.499			1.72	1.11	-0.264	1.48	-0.654	0.0521
1.54	2.5	0.605	-1.14	0.672	2.82	2.37	0.674			1.74	1.14	-0.28	1.57	-0.45	-0.0596
1.41	2.52	1.27	-1.48	1.74	2.49	2.42	0.699			1.7	1.14	-0.415	1.71	-0.862	-0.774
1.56	2.53	0.112	-0.994	2.6	1.94	2.2	0.666			1.73	1.08	0.0122	1.61	-0.568	-0.701
1.63	2.73	0.415	-1.13	2.45	1.99	2.22	0.441			1.64	0.313	-0.177	1.66	-0.71	-0.533
1.78	2.77	1.15	-0.495	1.99	2.06	2.19	0.188			1.73	1.51	-0.257	1.6	-0.0731	-0.43
1.9	2.72	1.01	-1.02	1.55	1.67	1.61	0.677			2	0.158	-0.305	1.53	-0.418	-0.0716
2.1	2.89	1.26	-0.885	1.03	1.93	1.52	0.124			1.97	0.0372	-0.38	1.47	-0.127	-0.792
1.8	2.33	1.61	-0.804	1.2	2.59	1.96	0.412			1.97	0.286	-0.113	1.43	-0.123	-0.797
1.69	2.41	1.26	-0.3	1.8	2.37	2.43	0.0135			2.08	0.617	-0.402	1.4	-0.364	-0.61
1.9	1.96	1.67	0.278	2.04	1.74	2.79	0.0214			2.07	0.512	-0.322	1.26	-0.319	-0.803
2.08	2.3	1.17	-0.406	1.93	1.93	2.24	0.103			1.99	0.244	-0.278	1.23	-0.427	-0.768
2.1	2.37	1.77	-0.369	1.79	2.7	1.31	0.114			1.99	0.285	-0.462	1.12	-0.723	-0.668
2.13	3.77	0.263	0.261	1.8	2.77	1.41	0.337			2.03	0.148	-0.43	1.07	-0.413	-0.948
1.8	4.12	1.32	0.416	1.89	2.13	2.29	-0.0388			1.86	0.0855	-0.507	1.05	-0.485	-1.17
1.86	4.42	0.594	0.31	2.18	2.07	2.34	0.457			1.92	0.789	-0.398	1.02	-0.372	-0.526
2.07	3.95	1.72	0.166	2.84	1.32	2.17	-0.114			1.95	-0.119	-0.377	0.958	0.0303	-1.27
2.11	4.31	0.305	0.106	2.83	0.412	2.46	0.137			1.86	0.888	-0.406	0.957	-0.288	-1.25
1.73	3.57	0.586	0.144	2.29	0.635	2.42	0.0437			1.7	0.333	-0.281	1.05	-0.298	-1.15
1.56	3.87	0.351	-0.183	2.04	0.88	2.06	0.324			1.55	0.298	-0.591	1.07	-0.043	-1.18
2.14	3.16	0.765	-0.459	1.56	1.06	1.63	0.614			1.62	-0.0643	-0.746	1.03	-0.941	-1.17
1.9	3	0.248	-0.12	1.33	1.29	1.37	-0.187			1.54	0.256	-0.437	0.912	-0.68	-1.58
1.9	2.19	-0.195	-0.248	1.43	1.26	1.82	0.0385			1.38	0.248	-0.711	0.899	-0.92	-1.56
1.6	2.31	1.64	-0.619	1.19	1.16	2.52	0.095			1.46	-0.166	-0.25	0.924	-0.803	-1.1
1.91	2.49	0.924	-0.803	1.16	0.929	2.6	0.617			1.22	-0.0803	-0.378	0.983	-1.11	-0.775
2.04	2.13	0.144	-0.733	1.57	0.502	2.69	0.149			1.28	0.545	-0.491	1.02	-0.871	-1.24
1.98	2.4	0.898	-1.29	1.63	0.544	2.91	0.197			1.11	1.52	-0.458	0.975	-0.987	-1.42
2.13	1.94	0.184	-1.03	1.8	0.514	2.84	0.542			1.2	1.6	-0.159	0.889	-0.516	-1.19
1.59	1.89	0.53	-0.327	1.49	0.559	2.42	0.131			1.07	1.78	-0.124	0.858	-0.903	-1.14
1.69	2.1	0.324	-0.507	0.724	0.499	2.63	0.217			1.23	2.43	-0.279	0.831	-1.1	-1.62
2.42	1.74	1.1	-0.784	0.808	0.306	2.82	0.331			1.12	2.74	-0.243	0.769	-0.508	-1.65
2.28	1.87	1.84	-0.448	1.27	0.232	2	0.912			0.934	2.45	-0.33	0.708	-0.703	-1.4
2.03	2.25	0.386	-0.0735	1.41	0.0353	1.43	0.0425			0.936	2.27	-0.402	0.781	-0.447	-1.39
2.46	0.957	1.19	-0.318	1.56	-0.126	1.88	0.503			0.887	2.57	-0.206	0.819	-0.729	-1.5
2.05	1.37	0.836	-0.421	1.82	-0.0414	2.16	0.308			0.9	2.21	-0.342	0.735	-0.417	-2.02
1.86	1.03	0.919	0.036	1.96	-0.173	1.92	0.653			0.874	1.7	-0.391	0.71	-0.119	-1.52
1.85	1.45	-0.558	-0.207	1.4	-0.469	1.89	0.619			0.922	1.93	-0.335	0.69	-0.24	-1.53
1.6	1.26	0.319	0.185	1.18	-0.736	2.04	0.611			0.809	2.12	-0.0807	0.707	-0.236	-1.24
1.79	1.38	-0.264	-0.546	1.67	-0.772	2.03	0.465			0.661	1.34	-0.431	0.697	-0.298	-1.39
2.22	1.19	0.138	-0.526	1.73	-0.59	1.94	0.533			0.596	1.84	-0.435	0.624	-0.0295	-1.66
2.68	1.08	0.772	-0.731	1.37	-0.709	2.1	0.371			0.727	1.31	-0.668	0.691	-0.219	-1.59
2.39	0.507	0.314	-0.117	1.04	-0.413	2.2	1.2			0.709	1.35	-0.358	0.741	0.118	-1.32
2.32	1.08	0.34	-0.143	0.845	0.195	2.3	1.33			0.87	1.59	-0.363	0.775	-0.04	-1.36
2.3	0.906	-0.594	-0.952	0.767	-0.182	2.28	0.87			0.938	1.45	-0.453	1.04	0.21	-1.58
2.21	0.438	-0.864	-0.821	0.834	-0.0151	1.97	1.5			1.06	0.934	-0.304	1.1	0.55	-1.76
2.41	0.681	0.143	-0.36	0.975	0.201	1.73	0.952			1.32	1.06	-0.463	1.07	0.115	-1.6
2.39	0.923	0.798	-0.454	0.992	-0.141	1.61	0.903			1.24	1.51	-0.609	1.03	0.131	-1.56
2.18	1.11	-0.131	-0.83	0.976	0.203	1.74	0.624			1.3	1.05	-0.463	0.949	0.0216	-1.39
2.59	1.78	-0.348	-0.927	1.04	0.117	1.76	0.631			1.3	0.42	-0.44	0.701	0.2	-1.47
2.18	1.39	1.1	-0.811	0.917	-0.0955	1.79	0.618			1.26	0.513	-0.407	0.485	-0.2	-1.42
2.43	1.32	-0.159	-0.665	1.44	0.437	1.8	0.366			1.08	-0.133	-0.535	0.179	-0.339	-1.57
2.49	1.19	0.83	-0.767	1.9	0.501	2.05	0.424			0.923	0.101	-0.461	-0.0478	-0.0851	-1.62
2.41	1.01	-0.905	-1.61	1.58	0.0981	2.12	0.682			0.909	0.41	-0.572	-0.305	0.034	-1.44
2.18	0.787	-0.208	-1.24	1.46	0.441	2.3	0.81			1.24	0.522	-0.596	-0.409	0.173	-1.34
2.25	0.0324	0.17	-1.38	1.69	0.935	2.26	0.515			1.16	0.938	-0.455	-0.492	-0.11	-1.52
2.27	0.345	0.0768	-1.11	1.38	0.891	1.66	0.446			1.17	0.297	-0.361	-0.493	-0.118	-1.8
2.37	0.0379	0.877	-1.62	1.06	0.522	1.85	0.688			1.06	0.111	-0.578	-0.467	-0.605	-1.38
2.35	-0.451	-0.234	-1.25	1.1	-0.0644	2.34	0.52			0.974	0.562	-0.781	-0.578	-0.0757	-1.02
1.87	0.208	0.545	-1.42	1.02	-0.0454	2.62	0.0994			0.905	0.48	-0.78	-0.433	-0.29	-1.14
2.24	0.492	0.894	-0.448	1.01	0.704	2.84	0.261			0.898	0.811	-0.705	-0.329	-0.0747	-1.71
2.6	0.622	0.0266	-1.22	1.52	1.45	2.87	0.479			0.809	0.639	-0.362	-0.411	-0.377	-1.32
2.24	0.509	0.118	-1.27	1.66	1.31	2.66	0.362			0.915	0.717	-0.59	-0.378	-0.0654	-1.69
2.6	0.532	0.304	-0.823	1.45	0.707	2.54	0.323			0.924	0.899	-0.525	-0.413	-0.103	-2.02
2.06	1.01	-0.88	-1.45	1.95	0.132	2.4	0.41			1.07	0.764	-0.835	-0.529	-0.251	-1.49
1.75	1.03	-0.0176	-0.959	2.12	0.506	2.69	0.0682			1.18	0.538	-0.45	-0.805	-0.525	-1.52
2.25	1.43	0.0443	-0.678	1.67	1.03	3.13	0.175			1.39	0.424	-0.767	-0.694	-0.0283	-1.91
1.91	0.749	-0.916	-0.996	2	1.07	3.23	-0.437			1.25	0.898	-0.775	-0.628	-0.153	-1.66
1.33	0.465	-1.09	-1.48	2.53	0.617	2.43	-0.222			1.37	0.91	-0.583	-0.529	-0.333	-1.57
2.13	0.711	-1.6	-1.21	1.91	0.147	1.71	0.165			1.17	0.527	-0.636	-0.473	0.0197	-1.95
2.32	0.136	-0.963	-1.74	1.23	-0.166	2.08	0.475			1.11	0.849	-0.671	-0.31	0.0284	-2.13
2.17	0.378	-0.131	-1.14	1.63	0.419	2.95	-0.0255			1.1	0.701	-0.723	-0.364	0.0612	-1.1
1.97	0.922	-0.446	-0.919	1.59	1.21	2.99	0.374			0.959	0.694	-0.839	-0.24	0.00855	-1.01
1.39	0.668	-0.354	-1.08	0.786	1.12	2.4	0.246			0.818	1.19	-0.734	0.0216	0.145	-1.23
2.04	1.27	0.0787	-1.16	0.676	0.64	1.76	-0.294			0.898	1.43	-0.684	-0.312	-0.29	-1.62
1.67	2.23	-1.14	-0.989	0.957	0.688	1.72	-0.331			0.944	1.55	-0.824	-0.499	0.04	-1.38
1.81	2.38	-0.703	-0.873	0.773	0.895	2.21	0.184			0.856	2.16	-0.558	-0.585	-0.552	-1.3
1.81	3.2	-0.0999	-1.5	0.239	0.443	2.76	0.0207			0.703	1.6	-0.689	-0.66	0.199	-1.27
1.73	3.46	0.036	-1.12	0.269	-0.105	2.2	0.242			0.741	1.71	-0.643	-0.669	0.053	-1.58
1.66	2.43	-0.816	-0.226	1.28	0.314	1.53	0.651			0.68	1.98	-0.839	-0.802	0.0233	-1.51
1.77	2.7	0.141	-0.816	1.31	0.555	2.3	0.817			0.734	1.87	-0.574	-0.73	-0.168	-1.47
1.61	2.27	0.423	-1.06	0.105	0.4	2.61	0.612			0.901	2.12	-0.655	-0.787	-0.0991	-1.64
2.33	1.84	-0.41	-0.848	0.134	0.565	1.39	1.07			0.902	1.2	-0.818	-0.596	0.048	-1.55
1.66	1.35	0.991	-0.621	0.782	0.804	0.592	1.45			0.895	2.3	-0.5	-0.116	0.0824	-1.07
1.84	1.42	0.201	-0.555	0.221	0.323	1.23	0.368			1.13	1.85	-0.783	0.0299	0.397	-0.763
2	1.71	0.375	-0.194	-0.234	-0.104	1.85	0.521			1.39	2.62	-0.674	-0.0722	0.364	-0.869
1.92	1.41	-0.0658	-0.198	-0.362	0.316	1.85	1.21			1.62	2.47	-0.769	-0.204	0.459	-0.475
2.36	1.34	0.757	-0.37	-0.394	0.841	1.47	0.711			1.59	2.32	-0.851	-0.428	0.285	0.235
2.16	0.899	0.261	-0.399	-0.0899	1.45	1.28	0.694			1.72	1.67	-0.834	-0.659	0.503	-0.0863
1.86	1.87	-0.447	-0.703	-0.174	1.34	1.24	0.339			1.62	2.51	-0.844	-0.22	0.224	-0.447
1.7	1.73	-0.285	-0.758	-0.357	0.344	1.31	0.431			1.74	3.09	-0.74	0.316	0.335	0.0743
2	1.08	0.651	-0.747	-0.353	0.0231	1.44	0.296			1.64	2.03	-0.804	0.401	0.224	0.0289
1.98	0.7	0.714	-0.497	-0.342	0.774	1.81	0.646			1.57	2.26	-0.61	0.38	0.617	0.21
2.71	0.922	1.55	-0.245	0.0284	0.799	1.9	0.243			1.54	1.7	-0.631	0.321	0.389	0.357
1.69	0.718	0.343	-0.121	0.18	1.11	1.85	0.474			1.47	1.25	-0.574	0.261	0.25	-0.101
1.62	0.372	-0.343	-0.243	0.155	2.1	2.12	0.561			1.39	1.81	-0.775	0.366	0.457	-0.588
1.28	0.409	-0.575	-0.641	0.168	2.36	2.01	0.664			1.32	1.4	-0.884	0.311	0.306	-0.11
1.82	1.08	0.0943	-0.611	-0.347	2.45	1.6	0.316			1.34	1.02	-0.551	0.119	0.337	-0.241
1.95	0.378	-0.329	-0.333	-0.25	3	1.78	0.794			1.47	0.756	-0.819	0.137	0.462	-0.72
2.35	0.277	0.372	-0.173	-0.0405	3.34	1.86	0.711			1.59	0.021	-0.652	0.397	0.469	-0.723
2.13	1.02	-0.252	-0.308	-0.257	3.56	1.38	0.173			1.58	0.582	-0.862	0.358	0.476	-0.235
1.85	1.09	-1	-0.71	-0.156	3.39	1.73	-0.229			1.53	0.333	-0.689	0.301	0.425	-0.323
2.39	0.865	0.313	-0.601	-0.221	2.79	2.36	0.342			1.42	0.459	-0.386	0.179	0.465	-0.593
2.22	0.632	-0.41	-0.321	-0.726	2.51	2.44	0.236			1.19	0.747	-0.639	0.143	-0.122	-0.474
2.46	0.68	-0.435	-0.419	-0.171	2.33	2.32	-0.183			1.24	0.698	-0.699	0.112	0.0192	-0.474
2.26	0.925	0.122	-0.544	0.459	1.7	2.55	-0.162			1.12	0.518	-0.894	0.102	0.594	-0.582
2.22	-0.386	0.14	-0.549	0.0795	1.83	2.7	0.263			1.22	0.445	-0.919	-0.0133	0.717	-0.502
2.16	0.109	0.0575	-0.729	-0.477	2.59	2.16	-0.575			1.1	0.0974	-0.51	-0.0336	1.3	-0.394
2.36	0.322	-0.0906	-0.573	-0.332	2.63	1.9	0.168			1.25	0.896	-0.459	-0.0133	1.48	-0.313
2.25	-0.0592	-0.251	0.256	-0.367	2.64	2.6	0.217			1.35	0.195	-0.452	0.203	1.23	-0.47
2.44	0.278	0.789	-0.35	-0.792	2.66	3.02	0.13			1.21	0.487	-0.597	0.305	1.05	0.32
1.99	0.165	0.568	-0.269	-0.771	2.03	3.4	0.00335			1.14	0.646	-0.641	0.592	1.38	0.367
2.02	0.222	0.709	-0.453	-0.322	1.96	4.04	0.248			1.41	0.386	-0.7	0.671	1.39	0.637
1.78	0.517	-0.233	-0.245	0.115	2.75	4.23	0.184			1.12	-0.438	-0.912	0.751	1.39	0.0555
2.1	0.458	0.809	0.208	-0.000882	1.97	3.81	-0.351			1.36	0.362	-0.717	0.485	0.861	0.184
2.36	0.345	0.364	0.361	-0.59	1.03	3.48	0.114			1.29	0.336	-0.602	0.398	1.01	0.443
1.84	0.43	0.72	0.245	-0.455	1.32	3.29	-0.551			1.42	0.519	-0.812	0.323	1.21	0.579
1.6	0.372	0.396	-0.331	0.431	1.61	3.34	-0.204			1.23	0.672	-0.641	0.0749	0.975	0.392
2.15	-0.0831	1.04	-0.0347	0.683	0.619	3.38	-0.741			1.34	1.05	-1.01	0.152	0.925	0.361
2.09	0.00755	0.588	-0.456	0.325	-0.0542	3.24	-0.0999			1.4	1.71	-0.773	0.312	0.866	-0.0855
1.38	0.387	0.102	-0.505	-0.0627	0.279	2.82	-0.491			1.73	2.25	-0.748	0.431	1.57	0.128
1.56	0.402	-0.233	-0.597	0.275	0.466	2.79	-0.425			1.98	1.97	-0.616	0.454	1.4	-0.143
2.1	0.0586	0.134	-0.524	1.05	0.273	2.72	-0.0811			1.73	2.44	-0.74	0.337	1.47	-0.305
1.56	0.391	-0.305	-0.94	0.689	1.01	2.25	-0.336			1.86	1.89	-0.823	0.315	1.68	-0.296
1.67	0.282	-0.438	-0.883	-0.135	1.45	2.07	-0.421			1.72	2	-0.642	0.418	1.35	-0.532
2.15	-0.362	-0.93	-0.711	0.0915	0.979	2.27	-0.725			1.82	1.75	-0.732	0.362	1.15	-0.223
1.91	-0.041	-0.179	-0.808	0.229	0.278	2.97	-0.794			1.7	1.7	-0.36	0.0183	1	-0.341
1.72	-0.0966	-1.02	-0.641	-0.133	0.0248	3.04	-0.693			1.86	1.78	-0.64	0.201	1.21	-0.434
1.74	-0.326	0.0467	-0.0769	-0.378	0.577	2.4	-0.698			1.92	0.65	-0.694	0.177	0.994	-0.781
1.91	0.222	0.0253	0.27	-0.49	1.14	1.85	-0.723			1.88	1.09	-0.759	0.158	0.423	-0.321
2.44	0.0857	0.63	-0.136	-0.527	1.27	1.67	-0.735			1.83	0.743	-0.765	-0.0229	0.458	-0.581
2.2	-0.0232	-0.456	0.207	-0.144	1.2	1.91	-0.485			1.88	1.47	-0.744	0.244	0.224	0.121
2.2	0.0185	-0.697	-0.00314	-0.176	1.07	1.95	-0.592			1.83	1.45	-0.651	0.147	-0.182	0.139
2.13	-0.34	-0.991	-0.455	-0.528	0.745	1.66	-0.71			1.98	1.18	-0.691	0.0865	0.169	0.571
2.21	0.654	-0.785	0.122	-0.32	0.524	1.51	-1.12			1.91	1.09	-0.88	0.12	0.423	0.664
1.8	0.0194	-0.738	-0.376	0.0189	0.838	1.53	-0.775			1.88	0.561	-0.867	0.141	-0.0819	0.721
2.43	0.232	-0.00456	-0.2	-0.166	1.19	1.79	-0.321			2.09	1.47	-0.684	0.0794	0.165	1.51
1.74	0.181	-0.942	-0.481	-0.816	1.16	1.92	-0.0397			2.08	1.56	-0.718	-0.0256	0.0504	1.63
1.83	0.757	0.288	-0.831	-0.818	0.416	2.17	-0.516			2.16	1.02	-0.536	0.107	-0.299	1.8
2.05	0.865	-1.15	-0.681	-0.225	-0.254	2.78	-1.08			2.41	1.94	-0.518	0.0517	-0.221	1.33
2.36	0.642	-0.207	-1.64	-0.0992	-0.136	2.56	-0.522			2.28	1.27	-0.462	0.0158	-0.274	1.25
2	0.622	-0.707	-1.58	-0.209	0.6	2.38	-0.479			2.34	1.85	-0.594	-0.136	0.0482	1.27
1.91	1.17	-0.0641	-1.32	-0.0832	0.698	2.87	-0.457			1.98	1.95	-0.562	-0.247	0.116	0.9
1.83	1.01	-0.886	-1.23	0.148	0.192	3.01	-0.135			2.03	1.21	-0.771	-0.128	-0.32	0.933
1.56	1.75	-0.535	-1.04	0.372	-0.496	2.57	0.102			2.05	1.77	-0.555	-0.285	-0.536	0.502
1.61	1.91	-0.194	-0.863	0.588	-0.658	2.69	0.0301			1.97	1.19	-0.746	-0.645	-0.259	0.462
1.56	2.89	-0.129	-0.745	0.457	-0.456	2.72	0.255			1.97	0.825	-0.676	-0.505	-0.148	0.588
1.43	2.41	-0.791	-0.576	0.328	-0.294	2.24	0.559			1.82	1.19	-0.806	-0.178	0.0745	0.189
1.54	2.18	-1.31	-0.314	0.0921	-0.18	3.15	0.0623			1.81	1.22	-0.96	-0.0678	-0.0317	0.369
1.51	2	-0.344	-0.855	0.142	-0.297	4.24	-0.299			1.78	1.08	-0.541	-0.134	0.235	0.593
2.13	1.68	-0.907	-0.558	0.482	0.361	3.79	0.203			1.75	0.901	-0.708	-0.289	0.776	0.606
1.49	1.09	-1.2	-0.643	0.848	0.409	3.15	0.213			1.76	0.553	-0.814	-0.214	-0.101	0.339
2.32	1.51	-0.0962	-0.814	0.588	-0.506	3.01	-0.123			1.71	0.263	-0.945	-0.0598	-0.0726	0.738
2.08	1.69	-0.436	-1.05	0.149	-0.523	3.14	-0.0308			1.84	0.341	-0.988	-0.17	0.0272	0.514
1.94	0.843	-0.12	-0.718	0.104	-0.171	3.36	-0.0692			1.86	0.185	-1.01	-0.312	0.19	1.34
1.85	0.711	-0.927	-0.988	0.238	0.107	2.97	0.568			2.14	0.269	-0.978	-0.295	0.23	0.578
2.48	0.781	-0.459	-0.432	0.373	0.383	2.43	0.982			2.21	0.527	-0.556	-0.336	0.281	0.772
2.37	0.0103	0.196	-0.854	0.676	0.253	2.24	0.844			2.3	0.0835	-0.78	-0.261	0.28	0.668
2.7	0.28	-0.812	-0.724	0.465	-0.236	2.87	0.325			2.18	0.168	-0.581	-0.239	0.457	0.59
2.18	0.179	-0.563	-0.981	0.145	-0.607	3.14	0.541			2.12	-0.137	-0.693	-0.251	0.874	0.192
2.51	0.0727	-0.0962	-0.7	0.0497	-0.411	2.55	0.551			2.22	0.24	-0.792	-0.235	0.179	0.441
2.38	0.116	-1.02	-0.965	0.283	-0.246	2.61	0.702			2	-0.0472	-0.469	-0.147	-0.0771	0.435
2.51	0.953	-1.64	-1.36	0.58	-0.372	3.3	0.172			2.04	0.377	-0.789	-0.211	0.432	0.767
2.15	0.79	-1.96	-1.11	0.78	-0.793	2.99	0.387			1.87	-0.179	-0.641	-0.058	0.856	0.868
2.31	0.532	-1.34	-1.21	0.619	-0.883	2.15	0.222			1.86	-0.399	-0.788	-0.0152	1.83	0.984
2.23	0.746	-1.8	-1.07	0.504	-0.741	2.27	0.164			1.91	-0.452	-0.61	-0.0556	1.08	0.67
2.3	0.793	-1.41	-0.862	0.634	-0.968	2.79	0.164			1.87	0.285	-0.534	-0.119	0.635	0.883
2.36	0.122	-0.729	-0.451	0.698	-1.13	2.51	0.625			1.95	-0.145	-0.406	-0.0705	1.08	0.64
1.98	0.53	-0.917	-1.13	0.941	-0.459	1.89	0.605			1.95	-0.432	-0.829	-0.0262	0.829	0.638
2.05	0.801	-1.17	-0.972	1.48	-0.165	1.72	0.486			2.17	-0.568	-0.567	-0.183	1.31	0.209
2.25	1.42	-0.531	-0.824	1.02	-0.22	2.01	0.105			2.13	-1.16	-0.583	-0.243	1.16	0.423
1.76	1.47	-0.515	-0.214	0.489	0.339	1.89	-0.109			2.14	-0.941	-0.489	-0.225	0.978	-0.054
2.23	0.919	-0.382	-0.834	0.493	0.217	1.74	0.293			2.18	-0.874	-0.649	-0.341	0.879	0.161
1.7	0.922	-0.357	-0.767	0.262	-0.592	2.14	0.314			2.11	-0.889	-0.567	-0.456	0.329	0.45
1.54	0.471	-1.59	-0.713	0.00763	0.027	1.69	-0.0978			2.12	-1.32	-0.535	-0.364	-0.278	-0.195
1.52	1.2	-0.938	-0.659	0.59	1.04	1.07	0.531			1.98	-1.09	-0.695	-0.286	0.101	-0.109
1.97	1.45	-1.56	-0.664	1.1	1.18	1.31	0.691			1.91	-1.41	-0.815	-0.308	-0.422	0.525
1.47	0.445	-1.38	-0.661	0.468	0.295	1.26	0.664			2.05	-1.59	-0.613	-0.378	-0.304	-0.0352
1.44	0.395	-0.831	-0.822	0.0903	0.227	0.994	0.715			2.2	-0.728	-0.506	-0.382	-0.104	-0.462
2.15	0.522	-0.553	-0.793	0.994	0.748	1.45	0.423			2.43	-0.676	-0.587	-0.404	-0.188	-0.359
1.49	0.495	-2.06	-0.273	1.69	0.48	1.33	0.556			2.41	-0.72	-0.69	-0.546	0.262	-0.62
1.85	1.03	-0.6	0.129	1.06	-0.354	0.913	0.879			2.14	-0.469	-0.745	-0.526	-0.126	-0.345
1.91	0.541	-0.803	-0.356	0.251	0.204	1.25	0.236			2.26	-1.03	-0.703	-0.275	-0.135	-0.455
1.87	0.531	-0.513	-1.25	0.39	0.798	1.23	0.472			2.26	0.0493	-0.655	-0.184	0.293	-0.585
1.97	0.431	-0.325	-0.341	0.672	0.699	0.816	0.645			2.17	-0.606	-0.317	-0.246	0.141	-0.356
1.43	0.282	-0.769	-0.711	0.393	0.573	0.891	0.0094			2.15	-0.767	-0.688	-0.383	0.0659	-0.39
1.63	1.03	-1.36	-0.767	-0.0487	0.142	0.711	0.127			2.12	-0.592	-0.547	-0.346	0.0158	-0.541
1.32	1.13	-0.715	-0.682	-0.379	-0.108	0.422	-0.25			2.17	-0.779	-0.466	-0.477	0.0545	-0.426
1.54	1.01	-0.661	-0.497	0.0772	0.0189	0.62	0.601			2.31	-0.839	-0.619	-0.508	-0.662	-0.562
1.5	0.979	-1.26	-0.908	1.45	0.635	0.679	0.391			2.58	-0.446	-0.751	-0.579	-0.153	-0.599
1.64	0.76	-1.54	-0.943	1.63	0.837	0.659	-0.303			2.64	-0.696	-0.67	-0.631	0.236	-0.925
1.21	0.855	-1.76	-0.854	0.943	1	0.588	0.636			2.74	-0.398	-0.739	-0.744	-0.111	-1.06
1.53	0.956	-0.964	-0.604	0.891	1.17	0.0294	0.0698			2.72	-0.331	-0.782	-0.976	0.539	-0.899
1.38	0.129	-1.42	-0.326	1.07	0.607	0.0458	0.00546			2.83	-0.795	-0.653	-1.07	0.251	-0.568
1.73	0.697	-0.64	-1.11	0.744	0.345	0.439	0.0727			2.87	-0.59	-0.397	-0.881	-0.156	-0.544
1.68	0.34	-0.478	-1.28	0.896	0.814	0.726	-0.265			2.79	-0.625	-0.582	-1.06	0.0998	-0.465
1.31	-0.00236	-0.392	-1.82	1.34	0.655	0.488	-0.377			2.61	-0.426	-0.646	-0.88	-0.0306	-0.768
1.45	0.654	-1.06	-1.27	0.898	0.287	-0.0434	-0.0265			2.76	-1.1	-0.681	-1.02	-0.0528	-0.937
1.21	0.238	-1.57	-0.884	0.356	0.696	0.0294	-0.52			2.66	-0.269	-0.47	-1.28	-0.748	-0.489
1.48	0.645	-1.03	-1.2	0.79	0.966	-0.201	-0.311			2.4	-0.495	-0.639	-1.37	-0.778	-0.0423
1.62	0.523	-1.04	-1.3	1.11	0.87	-0.697	-0.34			2.54	-0.482	-0.736	-1.06	-0.209	-0.775
1.47	0.88	-1.97	-1.36	0.933	0.578	0.246	-0.0283			2.58	-0.122	-0.547	-1.18	0.00197	-0.364
0.794	0.0169	-1.43	-1.63	1.05	-0.3	0.754	-0.346			2.29	-0.0218	-0.546	-1.3	-0.482	0.229
1.34	0.361	-2.22	-1.11	1.27	-0.0626	0.16	-0.0707			2.43	0.232	-0.464	-1.42	-0.352	-0.0485
1.28	0.112	-1.75	-0.939	0.626	0.573	0.0238	0.0454			2.15	-0.629	-0.659	-1.53	-0.366	-0.133
1.02	-0.24	-1.16	-1.36	-0.0414	-0.00575	0.225	-0.369			2.29	-7.88e-05	-0.558	-1.2	-0.486	-0.0526
1.35	-0.125	-0.194	-1.44	0.102	-0.406	-0.0997	0.118			2.22	-0.602	-0.53	-0.615	-0.563	0.256
1.9	-0.236	-1.04	-1.37	0.46	0.12	-0.115	-0.386			2.26	0.216	-0.699	-0.333	-0.122	-0.15
1.75	0.224	-0.929	-1.35	0.91	0.389	0.479	-0.242			2.54	-0.755	-0.806	-0.287	-0.278	0.186
1.74	-0.0224	-1.1	-1.63	1.35	0.0778	0.578	-0.332			2.42	-0.862	-0.494	-0.0989	-0.0128	0.035
[truncated: 25,467 more rows]
