# Supplementary material for: Metabolic sensing in AgRP neurons integrates homeostatic state with dopamine signalling in the striatum
Source: eLife journal article supplement (doi:10.7554/elife.72668), 2022-01-12
Supplement: fig1-figsupp2-data1 [file FigS2A.xlsx]

## Sheet: Sheet1
	AgRP Crat WT ip Saline							AgRP Crat WT ip Ghrelin							AgRP Crat KO ip Saline							AgRP Crat KO ip Ghrelin
0	0	0	0	0	0			0	0	0	0	0			0	0	0	0	0	0	0	0	0	0	0	0	0	0
	0.02	0.13	0		0.04			0.3	0.04	0.1	0.26	0			0	0	0.04	0				0.04	0.16	0.14	0.27	0.06	0.06	0.05
12pm	0.02	0.21	0	0.01	0.13			0.35	0.16	0.1	0.26	0			0	0	0.14	0	0.08	0	0.04	0.04	0.35	0.21	0.61	0.21	0.06	0.13
	0.02	0.23	0	0.01	0.13			0.37	0.4	0.1	0.26	0			0	0	0.16	0	0.08	0	0.04	0.09	0.35	0.25	0.7	0.25	0.06	0.13
1	0.02	0.23	0	0.01	0.13			0.39	0.45	0.1	0.26	0.11			0	0	0.18	0	0.08	0	0.04	0.1	0.35	0.25	0.7	0.26	0.08	0.16
	0.02	0.23	0	0.01	0.13			0.39	0.46	0.1	0.26	0.3			0	0	0.18	0	0.08	0	0.04	0.1	0.35	0.25	0.7	0.26	0.13	0.16
1pm	0.02	0.23	0	0.01	0.13			0.41	0.46	0.1	0.26	0.42			0	0	0.18	0	0.08	0	0.04	0.1	0.35	0.3	0.7	0.26	0.19	0.16
	0.02	0.23	0	0.01	0.13			0.41	0.46	0.1	0.26	0.42			0	0	0.18	0	0.08	0	0.04	0.1	0.35	0.58	0.79	0.26	0.22	0.16
2	0.02	0.23	0	0.01	0.13			0.56	0.46	0.1	0.26	0.42			0.05	0	0.18	0	0.08	0	0.04	0.1	0.35	0.64	0.79	0.26	0.29	0.16
	0.02	0.23	0	0.01	0.13			0.58	0.46	0.1	0.26	0.42			0.19	0	0.18	0	0.08	0.01	0.04	0.11	0.46	0.66	0.79	0.26	0.42	0.26
2	0.02	0.23	0	0.01	0.13			0.61	0.46	0.1	0.26	0.42			0.19	0	0.18	0	0.08	0.01	0.12	0.16	0.7	0.66	0.79	0.26	0.43	0.26
	0.02	0.24	0	0.07	0.15			0.61	0.46	0.31	0.26	0.42			0.19	0.2	0.18	0	0.08	0.01	0.12	0.18	0.7	0.68	0.8	0.26	0.55	0.26
3	0.03	0.24	0	0.1	0.15			0.61	0.46	0.31	0.26	0.42			0.19	0.2	0.18	0.02	0.08	0.01	0.23	0.18	0.7	0.68	0.8	0.26	0.55	0.26
	0.03	0.24	0	0.1	0.15			0.61	0.46	0.31	0.26	0.42			0.19	0.23	0.18	0.02	0.08	0.01	0.3	0.19	0.7	0.68	0.8	0.26	0.55	0.26
3	0.03	0.24	0	0.1	0.15			0.61	0.46	0.31	0.26	0.42			0.19	0.23	0.18	0.02	0.08	0.01	0.3	0.19	0.7	0.73	0.8	0.26	0.55	0.26
	0.03	0.24	0	0.1	0.15			0.61	0.46	0.31	0.26	0.42			0.19	0.23	0.18	0.02	0.19	0.01	0.32	0.2	0.7	0.73	0.8	0.26	0.55	0.26
4	0.03	0.24	0	0.1	0.15			0.61	0.46	0.31	0.26	0.42			0.19	0.23	0.18	0.02	0.3	0.01	0.32	0.21	0.7	0.93	0.8	0.26	0.55	0.26
	0.03	0.27	0	0.1	0.15			0.61	0.48	0.31	0.26	0.42			0.23	0.23	0.2	0.02	0.3	0.01	0.38	0.24	0.7	1.05	0.84	0.26	0.55	0.26
4	0.03	0.27	0	0.1	0.15			0.61	0.57	0.31	0.26	0.42			0.26	0.23	0.22	0.02	0.3	0.01	0.38	0.24	0.7	1.09	0.84	0.26	0.55	0.26
	0.03	0.29	0	0.1	0.16			0.61	0.57	0.31	0.26	0.42			0.52	0.23	0.22	0.02	0.3	0.01	0.45	0.24	0.7	1.09	0.84	0.26	0.55	0.26
5	0.03	0.29	0	0.1	0.16			0.64	0.57	0.31	0.26	0.42			0.52	0.23	0.25	0.02	0.3	0.01	0.45	0.24	0.7	1.09	0.84	0.3	0.57	0.26
	0.03	0.29	0	0.1	0.16			0.64	0.57	0.31	0.26	0.42			0.63	0.23	0.28	0.02	0.3	0.01	0.54	0.32	0.86	1.12	0.84	0.55	0.61	0.26
5	0.08	0.29	0	0.12	0.16			0.64	0.57	0.31	0.26	0.42			1	0.41	0.28	0.02	0.3	0.01	0.54	0.32	1.04	1.13	1.02	0.55	0.61	0.26
	0.09	0.29	0	0.12	0.19			0.64	0.57	0.59	0.26	0.42			1	0.54	0.28	0.02	0.3	0.01	0.6	0.32	1.19	1.22	1.18	0.55	0.77	0.27
6	0.09	0.29	0	0.12	0.19			0.64	0.57	0.65	0.26	0.42			1	0.54	0.28	0.02	0.3	0.01	0.6	0.32	1.22	1.31	1.18	0.55	0.9	0.28
	0.09	0.29	0.03	0.12	0.19			0.65	0.57	0.68	0.26	0.42			1	0.54	0.28	0.02	0.3	0.01	0.6	0.33	1.22	1.47	1.18	0.55	0.92	0.31
6	0.09	0.49	0.03	0.12	0.19			0.71	0.57	0.68	0.26	0.42			1	0.54	0.33	0.02	0.3	0.01	0.62	0.35	1.22	1.47	1.18	0.55	0.92	0.31
	0.09	0.55	0.03	0.12	0.19			0.89	0.57	0.68	0.27	0.52			1	0.54	0.34	0.02	0.54	0.01	0.72	0.36	1.22	1.47	1.18	0.55	0.92	0.31
7	0.09	0.63	0.03	0.12	0.21			0.99	0.57	0.68	0.27	0.53			1	0.54	0.38	0.02	0.64	0.01	0.72	0.36	1.22	1.47	1.18	0.55	0.92	0.33
	0.13	0.69	0.03	0.32	0.25			0.99	0.76	0.71	0.27	0.53			1	0.54	0.43	0.02	0.64	0.01	0.76	0.36	1.22	1.47	1.18	0.55	0.92	0.33
7pm	0.21	0.71	0.03	0.32	0.26			0.99	0.89	0.94	0.27	0.53			1.01	0.66	0.43	0.08	0.64	0.01	0.91	0.36	1.22	1.47	1.33	0.55	0.92	0.41
	0.21	0.98	0.21	0.32	0.64			1.07	0.89	1.57	0.32	0.53			1.01	0.77	0.43	0.08	0.64	0.24	1.04	0.36	1.22	1.86	1.41	0.55	0.92	0.41
8	0.21	1.07	0.33	0.4	0.64			1.17	1.09	1.57	0.43	0.68			1.03	0.77	0.72	0.09	0.7	0.24	1.05	0.46	1.22	1.92	1.41	0.61	0.95	0.6
	0.29	1.15	0.4	0.58	0.9			1.57	1.14	1.6	0.47	0.68			1.08	0.82	0.89	0.18	0.92	0.36	1.17	0.46	1.36	1.92	1.6	0.61	0.95	0.62
8	0.44	1.28	0.49	0.72	0.9			1.57	1.19	1.66	0.53	0.84			1.14	1.06	0.92	0.27	1.08	0.36	1.24	0.65	1.58	1.92	1.61	0.82	0.98	0.62
	0.54	1.36	0.49	0.77	1.34			1.57	1.4	1.73	0.61	0.84			1.18	1.12	1.02	0.47	1.16	0.39	1.29	0.72	1.68	1.92	1.61	0.82	1.07	1.12
9	0.55	1.45	0.49	0.88	1.34			1.57	1.4	1.95	0.62	0.84			1.26	1.13	1.15	0.63	1.35	0.39	1.48	0.72	1.8	2.13	1.78	0.9	1.07	1.33
	0.68	1.45	0.49	1.03	1.34			1.57	1.49	2.06	0.72	0.84			1.34	1.17	1.33	0.75	1.37	0.54	1.5	0.83	1.91	2.16	1.92	0.98	1.08	1.33
9	0.73	1.45	0.58	1.06	1.34			1.66	1.63	2.19	0.83	0.84			1.35	1.23	1.44	0.89	1.37	0.54	1.55	0.94	1.91	2.3	2.05	1.22	1.09	1.52
	0.81	1.45	0.62	1.19	1.34			1.69	1.74	2.26	0.83	0.84			1.49	1.31	1.57	0.89	1.37	0.54	1.7	1.11	1.91	2.46	2.13	1.25	1.09	1.52
10	0.89	1.45	0.79	1.24	1.34			1.69	1.89	2.34	0.91	0.84			1.53	1.55	2.07	1.1	1.37	0.7	1.74	1.11	1.91	2.71	2.17	1.3	1.12	1.62
	0.99	1.45	0.79	1.36	1.34			1.85	2.01	2.44	0.95	0.84			1.6	1.56	2.08	1.21	1.37	0.86	1.75	1.11	2.13	2.8	2.17	1.33	1.13	1.65
10	1.07	1.52	0.79	1.36	1.37			1.91	2.01	2.46	1.16	0.84			1.79	1.81	2.31	1.21	1.45	0.86	1.94	1.22	2.16	2.8	2.17	1.34	1.14	1.73
	1.17	1.72	0.79	1.36	1.37			2.15	2.06	2.46	1.16	0.84			1.99	1.87	2.31	1.21	1.72	0.86	1.94	1.3	2.26	2.8	2.17	1.42	1.15	1.73
11	1.28	1.85	0.79	1.46	1.46			2.17	2.12	2.53	1.3	0.84			2.05	1.94	2.31	1.3	1.87	0.95	2.24	1.3	2.54	3.07	2.35	1.42	1.16	1.91
	1.39	1.85	0.8	1.66	1.46			2.17	2.12	2.6	1.33	0.97			2.14	1.99	2.36	1.5	1.9	1.15	2.24	1.32	2.56	3.07	2.4	1.49	1.16	1.91
11	1.49	2.03	1.35	1.74	1.46			2.21	2.3	2.6	1.49	1.09			2.24	2.03	2.48	1.51	2.11	1.3	2.32	1.44	2.63	3.18	2.5	1.71	1.16	1.91
	1.56	2.05	1.35	1.74	1.46			2.25	2.3	2.6	1.51	1.09			2.36	2.19	2.67	1.52	2.16	1.39	2.33	1.48	2.63	3.28	2.67	1.87	1.16	2.13
12	1.59	2.27	1.55	1.85	1.46			2.25	2.35	2.61	1.51	1.33			2.58	2.25	2.79	1.52	2.36	1.44	2.42	1.92	2.75	3.99	2.67	1.92	1.16	2.13
	1.77	2.32	1.55	1.87	1.51			2.25	2.35	2.61	1.51	1.5			2.67	2.29	2.82	1.69	2.45	1.5	2.44	1.92	2.75	3.99	2.78	1.93	1.16	2.15
12am	1.83	2.32	1.55	1.89	1.65			2.57	2.35	2.61	1.51	1.55			2.69	2.33	3.06	1.77	2.64	1.65	2.44	1.92	2.84	4.15	2.86	2	1.16	2.36
	2.1	2.63	1.55	1.89	1.73			2.74	2.35	2.61	1.53	1.55			2.69	2.43	3.14	1.97	2.72	1.65	2.48	1.92	2.84	4.2	2.9	2	1.16	2.5
13	2.14	2.63	1.66	1.89	1.73			2.9	2.36	2.61	1.67	1.89			2.87	2.43	3.19	2.05	2.85	1.83	2.48	1.93	2.96	4.2	2.9	2.04	1.16	3.58
	2.22	2.63	1.66	1.89	1.86			2.9	2.37	2.73	1.72	1.89			2.93	2.51	3.27	2.11	2.94	1.93	2.51	2.03	2.96	4.22	2.9	2.16	1.23	3.8
1am	2.22	2.63	1.67	1.89	1.88			3	2.37	2.77	1.82	1.89			3.08	2.64	3.27	2.27	2.94	1.93	2.51	2.04	2.96	4.22	2.9	2.16	1.24	3.8
	2.27	2.63	1.67	1.89	1.88			3.08	2.44	2.77	2.08	1.89			3.28	2.69	3.28	2.34	2.96	1.93	2.57	2.37	2.96	4.28	2.9	2.16	1.24	3.84
14	2.35	2.63	1.94	1.89	1.88			3.08	2.46	2.97	2.15	1.89			3.28	2.69	3.42	2.4	2.96	1.94	2.57	2.37	2.96	4.29	2.9	2.16	1.24	4.02
	2.47	2.65	2.13	1.89	1.88			3.19	2.5	3	2.23	1.89			3.52	2.69	3.51	2.4	2.96	1.94	2.57	2.57	2.96	4.34	3.14	2.16	1.3	4.08
2	2.71	2.9	2.13	1.89	1.89			3.29	2.7	3.09	2.41	1.89			3.52	2.69	3.64	2.4	2.96	1.94	2.73	2.67	2.96	4.34	3.14	2.16	1.32	4.08
	2.75	2.9	2.2	1.89	1.89			3.39	2.9	3.24	2.41	1.89			3.52	2.69	3.66	2.4	2.96	1.94	2.89	2.67	2.96	4.41	3.36	2.16	1.32	4.08
15	2.85	2.9	2.43	1.9	1.89			3.42	3.01	3.41	2.56	1.89			3.52	2.69	3.66	2.4	2.96	1.94	3.01	2.79	2.96	4.46	3.43	2.16	1.32	4.08
	2.85	2.9	2.43	1.9	1.89			3.45	3.37	3.41	2.66	1.89			3.52	2.69	3.66	2.4	2.96	1.94	3.21	2.79	2.96	4.48	3.5	2.16	1.32	4.08
3	2.9	3	2.52	1.9	1.89			3.5	3.4	3.42	2.67	1.89			3.52	2.69	3.69	2.4	2.96	1.94	3.21	2.79	2.96	4.48	3.5	2.16	1.32	4.11
	2.94	3.05	2.52	1.9	1.89			3.69	3.4	3.42	2.89	1.89			3.52	2.69	3.74	2.4	2.96	1.94	3.21	2.87	2.96	4.48	3.53	2.16	1.32	4.11
16	3.02	3.16	2.52	1.9	1.89			3.71	3.4	3.46	2.89	1.89			3.52	2.82	3.74	2.4	2.96	1.94	3.26	2.88	2.96	4.48	3.54	2.16	1.32	4.11
	3.03	3.22	2.52	1.9	1.89			3.75	3.4	3.48	3.06	1.89			3.52	2.89	3.76	2.4	3.06	1.94	3.28	2.88	2.98	4.48	3.61	2.16	1.32	4.11
4	3.03	3.34	2.52	1.91	2.09			3.75	3.42	3.5	3.31	1.89			3.62	2.93	3.85	2.4	3.22	1.94	3.28	2.91	2.98	4.61	3.61	2.16	1.32	4.11
	3.03	3.34	2.52	1.97	2.09			3.77	3.42	3.71	3.33	1.89			3.62	3.07	3.85	2.52	3.25	2.07	3.36	2.93	2.98	4.7	3.62	2.16	1.33	4.16
17	3.03	3.34	2.52	1.97	2.09			3.77	3.42	3.78	3.33	1.89			3.76	3.13	3.85	2.84	3.37	2.07	3.41	2.93	2.98	4.88	3.62	2.16	1.37	4.16
	3.03	3.51	2.52	1.97	2.09			3.77	3.42	3.84	3.33	1.89			3.78	3.19	3.85	2.84	3.56	2.07	3.51	2.93	2.98	5	3.71	2.16	1.37	4.16
5	3.03	3.57	2.52	1.97	2.1			3.77	3.42	3.86	3.33	1.89			3.78	3.19	3.85	2.84	3.56	2.07	3.54	2.93	2.98	5.02	3.71	2.16	1.37	4.16
	3.1	3.63	2.52	1.97	2.1			3.77	3.42	3.86	3.33	1.89			3.78	3.25	3.85	2.84	3.61	2.15	3.54	2.93	2.98	5.02	3.73	2.16	1.37	4.16
18	3.14	3.7	2.52	1.97	2.3			3.86	3.42	3.86	3.33	1.89			3.78	3.28	3.85	2.84	3.61	2.21	3.54	3.14	2.98	5.07	3.73	2.16	1.37	4.16
	3.24	3.85	2.52	1.98	2.31			3.93	3.44	3.86	3.33	1.89			3.78	3.28	3.85	2.84	3.61	2.23	3.66	3.25	2.98	5.07	3.92	2.16	1.37	4.24
6	3.3	4.07	2.52	1.98	2.88			3.95	3.51	3.86	3.33	1.89			3.78	3.28	3.85	2.96	3.61	2.28	3.76	3.27	2.98	5.07	4.02	2.16	1.37	4.24
	3.31	4.07	2.52	2.03	2.88			3.95	3.51	3.86	3.33	1.89			3.78	3.28	3.85	3.36	3.61	2.28	3.79	3.71	2.98	5.07	4.11	2.41	1.37	4.63
19	3.33	4.23	2.72	2.06	2.88			4	3.53	3.86	3.33	1.89			3.78	3.28	3.87	3.44	3.61	2.28	3.93	3.71	2.98	5.07	4.14	2.5	1.37	4.67
	3.34	4.38	2.72	2.1	2.88			4.01	3.56	3.96	3.33	1.9			3.8	3.28	4.1	3.44	3.61	2.29	3.93	3.71	2.98	5.07	4.25	2.72	1.37	4.71
7	3.34	4.65	2.81	2.28	2.88			4.01	3.62	3.96	3.33	2			3.92	3.28	4.35	3.44	3.61	2.29	3.93	3.85	2.98	5.12	4.34	3.11	1.37	4.78
	3.34	4.7	2.85	2.28	2.9			4.02	3.89	4.02	3.33	2.17			3.94	3.28	4.45	3.44	3.61	2.29	3.93	3.85	2.98	5.26	4.34	3.12	1.37	4.78
20	3.34	4.81	2.85	2.3	2.96			4.02	3.89	4.07	3.33	2.3			3.94	3.28	4.54	3.44	3.61	2.29	3.93	3.91	2.98	5.29	4.34	3.13	1.37	4.81
	3.34	4.81	2.85	2.41	2.96			4.02	3.89	4.08	3.33	2.3			3.94	3.28	4.75	3.44	3.61	2.29	3.98	3.91	2.98	5.29	4.34	3.16	1.37	4.9
8	3.34	4.81	2.85	2.41	2.96			4.02	3.91	4.08	3.33	2.34			3.94	3.28	4.75	3.44	3.61	2.29	3.98	3.91	3.01	5.31	4.34	3.16	1.37	4.9
	3.34	4.81	2.85	2.41	2.96			4.05	3.91	4.08	3.33	2.35			3.94	3.28	4.75	3.44	3.61	2.29	3.98	3.91	3.04	5.32	4.34	3.16	1.37	4.9
21	3.34	4.9	2.85	2.41	2.96			4.05	3.91	4.08	3.33	2.35			3.94	3.28	4.85	3.44	3.61	2.29	3.98	3.91	3.17	5.32	4.36	3.16	1.37	4.9
	3.34	4.9	2.85	2.41	2.96			4.06	3.91	4.08	3.33	2.35			3.94	3.28	4.87	3.44	3.61	2.29	4.02	3.91	3.34	5.32	4.36	3.16	1.39	4.9
9	3.34	4.93	2.85	2.41	2.96			4.06	3.92	4.08	3.33	2.35			3.94	3.28	4.87	3.44	3.62	2.29	4.02	3.92	3.44	5.33	4.36	3.16	1.39	4.9
	3.34	4.93	2.85	2.41	2.96			4.06	3.92	4.08	3.33	2.35			3.96	3.28	4.89	3.44	3.62	2.29	4.04	3.98	3.53	5.38	4.36	3.16	1.39	4.9
22	3.34	4.93	2.85	2.41	2.96			4.06	3.92	4.08	3.33	2.35			3.96	3.28	4.89	3.44	3.68	2.29	4.1	3.98	3.66	5.38	4.51	3.16	1.39	4.9
	3.34	4.97	2.85	2.41	2.96			4.06	3.92	4.08	3.33	2.35			3.96	3.28	4.89	3.44	3.68	2.29	4.1	3.98	3.82	5.38	4.51	3.16	1.39	4.9
10	3.34	5.05	2.85	2.41	2.96			4.06	3.92	4.08	3.33	2.35			3.96	3.29	4.89	3.44	3.68	2.29	4.1	3.98	3.85	5.38	4.52	3.16	1.39	4.9
	3.34	5.05	2.85	2.41	2.96			4.06	3.92	4.08	3.33	2.35			3.96	3.29	4.89	3.44	3.68	2.29	4.3	3.98	3.89	5.38	4.52	3.16	1.41	4.99
23	3.34	5.13	2.85	2.41	2.96			4.06	3.92	4.08	3.33	2.35			3.96	3.29	4.89	3.44	3.68	2.29	4.34	3.98	3.89	5.38	4.52	3.16	1.41	4.99
	3.34	5.13	2.85	2.41	2.96			4.06	3.92	4.08	3.33	2.35			3.96	3.29	4.89	3.44	3.68	2.29	4.35	3.98	3.89	5.38	4.52	3.16	1.41	4.99
11am	3.34	5.13	2.85	2.41	2.96			4.06	3.92	4.08	3.33	2.35			3.96	3.29	4.89	3.44	3.68	2.29	4.35	3.98	3.89	5.38	4.52	3.16	1.41	4.99
	3.34	5.13	2.85	2.41	2.96			4.06	3.92	4.08	3.33	2.35			3.96	3.29	4.89	3.44	3.68	2.29	4.35	3.98	3.89	5.42	4.52	3.16	1.41	4.99
24	3.34	5.13	2.85	2.41	2.96			4.06	3.92	4.08	3.33	2.35			3.96	3.29	4.89	3.44	3.68	2.29	4.35	4.01	3.89	5.42	4.52	3.16	1.41	4.99
12
12
1
1
