# Supplementary material for: Metabolic sensing in AgRP neurons integrates homeostatic state with dopamine signalling in the striatum
Source: eLife journal article supplement (doi:10.7554/elife.72668), 2022-01-12
Supplement: fig1-figsupp2-data1 [file FigS2B.xlsx]

## Sheet: Sheet1
	AgRP Crat WT ip Saline							AgRP Crat WT ip Ghrelin							AgRP Crat KO ip Saline							AgRP Crat KO ip Ghrelin
0	0	0	0	0	0			0	0	0	0	0			0	0	0	0	0	0	0	0	0	0	0	0	0	0
	0.02	0.13	0		0.04			0.3	0.04	0.1	0.26	0			0	0	0.04	0				0.04	0.16	0.14	0.27	0.06	0.06	0.05
	0.02	0.21	0	0.01	0.13			0.35	0.16	0.1	0.26	0			0	0	0.14	0	0.08	0	0.04	0.04	0.35	0.21	0.61	0.21	0.06	0.13
	0.02	0.23	0	0.01	0.13			0.37	0.4	0.1	0.26	0			0	0	0.16	0	0.08	0	0.04	0.09	0.35	0.25	0.7	0.25	0.06	0.13
1	0.02	0.23	0	0.01	0.13			0.39	0.45	0.1	0.26	0.11			0	0	0.18	0	0.08	0	0.04	0.1	0.35	0.25	0.7	0.26	0.08	0.16
	0.02	0.23	0	0.01	0.13			0.39	0.46	0.1	0.26	0.3			0	0	0.18	0	0.08	0	0.04	0.1	0.35	0.25	0.7	0.26	0.13	0.16
	0.02	0.23	0	0.01	0.13			0.41	0.46	0.1	0.26	0.42			0	0	0.18	0	0.08	0	0.04	0.1	0.35	0.3	0.7	0.26	0.19	0.16
	0.02	0.23	0	0.01	0.13			0.41	0.46	0.1	0.26	0.42			0	0	0.18	0	0.08	0	0.04	0.1	0.35	0.58	0.79	0.26	0.22	0.16
2	0.02	0.23	0	0.01	0.13			0.56	0.46	0.1	0.26	0.42			0.05	0	0.18	0	0.08	0	0.04	0.1	0.35	0.64	0.79	0.26	0.29	0.16
	0.02	0.23	0	0.01	0.13			0.58	0.46	0.1	0.26	0.42			0.19	0	0.18	0	0.08	0.01	0.04	0.11	0.46	0.66	0.79	0.26	0.42	0.26
	0.02	0.23	0	0.01	0.13			0.61	0.46	0.1	0.26	0.42			0.19	0	0.18	0	0.08	0.01	0.12	0.16	0.7	0.66	0.79	0.26	0.43	0.26
	0.02	0.24	0	0.07	0.15			0.61	0.46	0.31	0.26	0.42			0.19	0.2	0.18	0	0.08	0.01	0.12	0.18	0.7	0.68	0.8	0.26	0.55	0.26
3	0.03	0.24	0	0.1	0.15			0.61	0.46	0.31	0.26	0.42			0.19	0.2	0.18	0.02	0.08	0.01	0.23	0.18	0.7	0.68	0.8	0.26	0.55	0.26
	0.03	0.24	0	0.1	0.15			0.61	0.46	0.31	0.26	0.42			0.19	0.23	0.18	0.02	0.08	0.01	0.3	0.19	0.7	0.68	0.8	0.26	0.55	0.26
	0.03	0.24	0	0.1	0.15			0.61	0.46	0.31	0.26	0.42			0.19	0.23	0.18	0.02	0.08	0.01	0.3	0.19	0.7	0.73	0.8	0.26	0.55	0.26
	0.03	0.24	0	0.1	0.15			0.61	0.46	0.31	0.26	0.42			0.19	0.23	0.18	0.02	0.19	0.01	0.32	0.2	0.7	0.73	0.8	0.26	0.55	0.26
4	0.03	0.24	0	0.1	0.15			0.61	0.46	0.31	0.26	0.42			0.19	0.23	0.18	0.02	0.3	0.01	0.32	0.21	0.7	0.93	0.8	0.26	0.55	0.26
