# Supplementary material for: Metabolic sensing in AgRP neurons integrates homeostatic state with dopamine signalling in the striatum
Source: eLife journal article supplement (doi:10.7554/elife.72668), 2022-01-12
Supplement: fig1-figsupp2-data1 [file FigS2D.xlsx]

## Sheet: Sheet1
Agrp Cre									Agrp Crat
-0.721	-0.693	0.0908	-1.16	-0.891	1.99	2.05	0.0249		1.11	1.41	0.755	-0.535	-0.555	-0.379
-0.366	-0.765	0.825	-0.719	-0.814	1.66	2.15	-0.141		0.407	0.285	-0.747	-0.637	-0.184	-0.639
-0.447	-0.797	0.307	0.165	-0.763	1.36	1.94	-0.263		2.09	0.989	-0.777	-0.78	0.0197	-0.122
-0.324	-0.912	0.133	0.266	-0.61	1.8	1.45	0.249		-0.0751	0.0454	-0.383	-0.842	0.712	0.273
-0.442	-0.409	-0.195	0.671	0.0351	1.85	1.76	-1.58		-0.149	-0.913	-1.51	-0.753	0.251	-0.108
0.544	-0.708	0.861	0.155	-0.0601	1.41	2.12	-0.416		0.58	0.226	-1.27	-0.837	-0.342	-0.154
-0.096	-0.722	0.742	0.997	-0.632	0.929	1.65	0.561		0.743	1.25	-0.804	-0.85	0.969	-0.69
-0.00263	-0.595	-0.56	0.513	-0.622	1.02	1.35	0.405		-0.384	1.39	-1.47	-0.851	-0.594	0.256
-0.226	-0.545	0.131	0.0517	-0.448	1.38	1.53	-0.243		-0.265	1.1	0.38	-0.933	-0.798	0.136
-0.201	-0.883	0.484	0.293	-0.587	1.43	1.35	0.665		-1.09	0.414	0.132	-0.607	-0.855	0.624
-0.552	-0.652	0.37	-0.469	-0.883	0.933	1.09	0.119		0.351	0.72	-0.0297	-0.766	-0.588	0.498
0.0078	-0.298	-0.211	-0.679	-0.761	0.733	1.02	0.283		-0.117	0.765	-0.287	-0.749	0.086	0.0575
-0.205	-0.58	0.459	0.476	-0.338	0.884	1.12	0.467		0.806	-0.847	-0.821	-0.841	-1.34	0.482
0.0221	-0.44	0.181	-0.322	-0.371	1.18	1.62	1.12		0.543	-0.0628	-0.134	-0.657	-0.157	0.0252
0.000957	-0.327	-0.0968	0.33	-0.292	1.09	2.07	1.34		1.33	0.617	-1.47	-0.714	0.301	0.121
0.372	-0.645	0.087	0.587	0.168	0.543	1.75	1.44		0.534	0.291	-1.26	-0.576	0.4	-0.129
0.32	-0.978	0.213	0.246	0.163	0.383	1.39	1.55		1.32	0.313	-0.506	-0.674	0.0743	0.00551
0.444	-1.33	0.0236	0.115	-0.17	0.829	1.75	0.66		1.32	1.82	-0.979	-0.835	0.127	-0.134
0.144	-1.06	0.198	-0.771	-0.553	1.17	2.33	0.566		0.692	0.504	-1.09	-0.9	0.73	-0.628
-0.15	-0.915	0.612	-0.425	-0.689	0.938	2.57	-0.182		-0.704	0.131	0.427	-0.868	0.364	0.0709
0.872	-0.869	0.712	-0.302	0.0088	0.745	2.39	-0.0893		1.85	0.898	-1.15	-0.987	-0.138	-0.205
0.875	-0.913	0.642	-0.992	0.645	1.01	1.87	-1.53		-0.101	0.612	0.765	-1.15	-0.165	-0.991
0.261	-1.25	0.329	-0.667	0.209	1.07	1.72	-0.509		0.144	0.819	0.575	-0.995	0.781	-0.572
0.106	-1.41	0.881	-1.01	-0.536	0.847	2.4	1.69		0.957	0.0652	-0.356	-1.12	-0.57	-0.731
0.477	-1.69	1.56	-0.722	-0.665	0.853	2.81	0.412		1.2	0.644	-0.755	-1.13	-1.11	-0.47
0.992	-1.51	1.72	-0.657	-0.619	0.956	2.66	0.829		-1.11	0.504	-1.35	-1.07	-0.976	-0.344
0.536	-1.43	0.796	-0.0474	-0.314	0.868	2.1	0.0195		-0.975	0.0737	-0.161	-1.05	-0.0277	-0.521
0.123	-1.55	0.44	-0.164	0.232	0.604	1.8	-0.313		-0.962	0.237	-0.583	-1.21	-0.419	-0.277
0.0131	-1.08	0.0759	-1.06	0.611	0.797	1.82	0.893		-0.134	0.0752	-0.64	-1.22	-0.55	-0.103
-0.204	-1.01	1.08	-0.695	0.355	1.19	1.82	-1.25		0.864	0.295	0.0558	-1.05	0.567	-0.432
0.103	-0.274	0.463	0.392	-0.098	1.06	2.01	0.577		2.06	0.198	-0.48	-0.96	-0.131	-0.17
0.341	-0.287	0.318	-0.675	-0.147	0.826	2.49	0.422		1.97	-0.0302	-1.1	-1.05	-0.283	0.224
-0.109	-0.00289	0.71	-0.366	-0.443	0.797	2.92	0.107		0.218	-0.346	0.0928	-0.953	-1.12	0.163
0.135	0.00439	0.878	0.0785	-0.502	0.384	2.42	0.00106		1.55	0.755	-0.3	-1.13	-0.544	-0.17
0.332	-0.35	0.893	-1.48	-0.0813	0.381	1.74	1.01		1.01	-0.00846	-0.72	-1.03	0.0446	-0.0077
0.254	-0.364	0.484	-0.956	0.573	0.843	1.52	0.951		1.58	0.715	-0.358	-1.07	0.39	-0.191
-0.764	-0.118	1.29	-0.705	0.836	1.01	1.79	1.12		2.1	1.26	0.0496	-1.15	-0.37	-0.415
0.33	-0.0674	1.1	-0.8	0.364	0.946	2.09	0.997		-0.668	0.986	-0.184	-1.24	-0.645	-0.393
-0.304	-0.163	0.408	-0.194	-0.139	1.41	2.27	0.509		1.67	2.19	0.469	-1.28	0.187	-0.335
0.0114	-0.411	0.601	-0.157	0.0433	1.48	1.85	-0.205		0.559	1.99	1.88	-1.38	-1.03	-0.542
-0.149	-0.665	0.321	0.19	0.439	1.22	1.64	0.00713		0.391	1.86	0.00994	-1.23	-0.931	-0.903
-0.179	-0.516	0.983	-0.382	0.537	1.02	2.18	1.08		-0.056	1.01	1.02	-1.22	-0.703	-0.915
0.172	-0.693	0.544	-0.088	0.418	1.18	2.36	-0.218		0.154	2.1	-0.00709	-1.2	-0.784	-0.796
-0.265	-0.814	0.452	-0.333	-0.0184	1.19	2.04	1.62		0.973	0.801	1.04	-1.08	-0.106	-0.901
-0.296	-0.64	0.505	-0.89	0.171	0.989	1.94	-0.159		-0.887	1.22	1.09	-0.93	-0.862	-0.731
0.246	-0.598	0.697	-1.06	0.57	1.04	1.93	2.35		1.57	0.683	0.518	-1.11	-0.654	-0.289
0.133	-0.489	1.25	0.00126	0.358	1.01	1.72	2.02		-0.0643	2.2	0.0235	-1.02	-0.319	-0.23
0.847	0.0987	0.456	0.272	0.637	0.657	1.6	0.912		0.368	2.47	0.118	-1.07	-0.179	0.673
0.48	0.666	0.838	-0.285	1.02	0.339	1.99	0.976		1.44	1.37	0.482	-1.08	0.46	0.726
0.433	0.549	1.08	-0.0886	0.486	0.527	1.99	2.08		0.967	1.32	-0.648	-1.07	-0.374	0.81
0.305	0.318	0.408	-0.186	0.0587	1	1.76	1.76		-0.886	0.782	0.954	-1.01	-0.916	0.347
0.379	0.385	0.335	0.269	0.152	1.04	2.08	1.71		1.66	1.47	0.618	-1.16	-0.201	0.903
0.0441	0.387	0.509	-0.247	0.185	0.854	2.46	1.06		1.42	0.522	0.303	-0.922	-0.336	0.96
0.0642	0.101	0.681	0.47	0.199	0.936	2.61	1.66		2.43	-0.59	-0.703	-0.932	-0.224	0.916
0.393	0.191	0.817	-0.746	0.629	0.956	2.59	2.46		1.97	2.02	-0.874	-0.934	-0.325	0.964
0.483	-0.134	0.778	0.0894	0.755	0.669	2.7	1.39		0.44	1.92	-0.991	-0.903	0.222	1.14
0.207	0.707	0.0676	-0.694	0.194	0.727	2.7	3.82		1.89	1.14	-0.365	-1.07	-1.27	1.04
-0.183	0.57	0.33	0.0645	-0.0767	0.977	2.7	1.25		0.421	1.19	1.57	-0.871	-0.552	0.258
0.0243	0.472	-0.22	0.0586	0.0582	0.942	2.43	1.68		0.425	-0.0919	1.93	-0.961	-1.04	-0.0455
0.692	0.118	0.564	0.292	0.396	0.827	1.84	1.19		0.745	0.45	2.05	-0.921	-1.08	-0.118
0.193	-0.351	0.429	-0.624	0.38	0.99	1.82	1.35		1.7	1.14	1.95	-0.992	0.0994	0.179
0.543	-0.666	0.734	0.000229	0.26	1.44	1.99	0.934		1.72	-0.334	1.17	-0.895	0.281	-0.447
0.491	-0.806	0.917	-0.119	0.289	1.37	1.49	0.558		2.23	0.146	1.43	-1.11	0.171	-0.385
0.315	-0.656	0.73	0.462	0.264	0.756	1.27	2.08		0.724	0.268	0.833	-0.964	-0.139	-0.632
0.147	-0.528	0.432	0.0288	0.758	0.65	1.77	1.84		1.57	0.893	-0.393	-1.07	-0.0444	-0.516
0.223	-0.471	1.74	0.496	0.623	0.581	2.44	1.15		-0.272	1.02	0.453	-1.15	-0.932	-0.00252
0.294	-0.7	0.238	-0.345	-0.0448	0.264	2.05	0.717		1.34	0.855	1.19	-1.24	0.0642	-0.0845
0.4	-0.381	0.783	0.155	0.321	0.593	1.09	2.13		0.79	0.0813	0.756	-1.14	0.469	-0.712
0.575	-0.42	1.21	-0.256	0.547	1.07	0.835	0.612		1.28	0.00174	0.64	-1.07	-0.895	-0.805
1.18	-0.603	1.53	-1.24	0.0243	0.971	1.33	0.676		-0.115	-0.705	0.207	-1.13	-0.917	-0.0843
1.12	-0.278	1.38	-1.03	0.498	0.336	2.06	1.27		1.07	-0.323	1.61	-1.26	0.612	-0.221
0.441	-0.28	0.204	0.461	0.649	0.264	2.35	2.28		1.02	0.878	0.804	-1.23	-0.0544	-0.969
0.435	-0.374	0.0637	0.852	-0.213	0.65	1.89	-0.36		-0.699	-0.444	0.7	-1.08	-1.48	-0.286
0.968	-0.276	0.522	0.493	-0.735	1.04	1.47	1.17		-0.38	1.08	0.381	-0.958	-1.65	-0.632
0.654	0.103	0.961	0.11	-0.678	0.683	1.57	1.17		0.68	1.05	-0.00141	-0.941	-1.83	-0.506
0.979	-0.11	1.59	-0.758	-0.581	0.311	1.79	0.737		0.12	0.412	-0.00715	-0.961	-0.119	-0.245
0.703	0.0122	1.05	0.0518	-0.163	0.81	1.73	0.903		0.302	0.659	0.15	-0.694	-0.11	-0.447
0.581	-0.339	0.933	0.517	-0.0203	0.771	1.44	1.53		0.00514	0.0653	1.36	-0.756	-0.278	-0.639
0.693	0.104	0.734	0.13	-0.326	0.449	1.61	1.75		0.405	1.3	1.24	-0.868	0.447	-0.625
0.592	0.445	1.2	0.453	-0.355	0.683	2	1.99		-0.291	1.82	0.111	-0.873	0.371	-1.39
0.737	0.337	0.734	-0.33	-0.16	1.07	2.1	0.952		0.41	1.96	-0.226	-0.836	0.371	-0.626
0.635	0.439	0.823	-0.37	-0.149	1.08	2.21	-0.343		1.02	1.01	-0.469	-0.887	-0.388	-1.32
0.296	0.252	1.09	-0.369	0.117	0.778	2.35	1.15		2.76	1.54	0.636	-0.909	-0.313	-0.98
0.485	0.218	0.768	-0.25	0.202	1.12	1.76	-0.106		1.64	0.544	-0.0671	-0.851	-0.202	-1.53
0.865	0.128	0.66	-0.267	-0.161	1.34	1.56	1.35		1.52	0.75	-0.332	-0.779	-0.773	-1.1
0.653	-0.0268	0.235	-0.566	-0.125	0.92	1.81	-0.594		-0.59	-0.587	-0.782	-0.822	-0.387	-0.794
0.228	-0.532	0.392	-1.07	0.201	0.864	1.96	0.183		1.94	-0.461	0.0466	-0.861	-0.794	-0.604
0.445	-0.401	0.809	-0.545	0.167	1.26	2.03	0.169		0.219	-0.299	-0.0258	-0.788	-0.257	-0.462
0.371	-0.658	0.931	-0.676	0.172	1.51	1.83	1.18		-0.144	-0.644	-0.306	-0.615	0.619	0.348
0.137	-0.431	0.764	-0.131	0.254	1.32	1.96	0.216		-0.898	1.34	1.53	-0.704	0.89	-0.0242
0.187	-0.393	0.789	0.358	-0.102	1.18	2.17	-0.202		-1.25	-0.237	0.00987	-0.7	0.694	0.376
0.324	-0.577	1.34	-0.226	0.114	1.06	2.38	0.346		-0.644	-0.854	-0.424	-0.697	0.173	0.0616
0.415	-0.247	0.0767	-0.29	0.643	1.03	2.23	0.158		-1.08	-0.118	0.138	-0.904	-0.0927	-0.0751
0.0314	-0.325	0.287	-1.58	0.246	1.11	1.99	-0.797		-0.301	0.109	0.789	-0.653	0.655	-0.242
0.565	0.355	1.22	-0.982	-0.595	0.999	1.75	0.916		0.67	0.682	-0.151	-0.757	0.779	-0.451
0.532	0.292	0.913	-0.747	-0.294	0.947	1.96	-0.907		-0.441	-0.226	0.197	-0.799	0.113	-1.06
0.0973	0.22	0.949	-1.33	0.278	1.15	2.39	0.0942		0.983	1.66	1.18	-0.767	-0.33	-0.48
0.586	0.335	0.332	-0.655	-0.138	1.25	2.3	0.433		0.856	0.37	0.694	-0.683	0.628	-0.86
0.65	0.244	-0.284	0.0344	-0.694	1.16	1.72	0.903		0.0285	1.86	1.02	-0.839	0.895	-0.465
0.153	-0.155	0.17	-0.017	-0.131	0.992	1.93	0.88		0.952	1.36	-0.18	-0.772	1.02	-0.507
0.392	-0.00963	0.984	-1.05	0.934	0.732	2.66	0.0744		2.36	0.378	-0.527	-0.663	-0.391	0.136
0.837	-0.211	0.728	-1.31	1.44	1.03	2.59	0.754		0.697	0.706	-0.905	-0.891	0.301	-0.272
0.484	-0.161	0.622	-1.51	1.08	1.43	2.13	-0.0571		-0.901	1.22	-0.705	-1.07	0.0795	-0.176
0.687	-0.146	0.653	-1.42	0.675	1.55	2.1	1.95		-0.391	0.287	-0.599	-1.04	0.158	0.581
0.526	-0.121	1.11	-1.08	0.625	1.63	2.43	-0.479		0.67	0.108	0.638	-1.15	0.0714	0.156
0.0122	0.164	0.686	-0.46	0.905	1.41	2.58	1.3		2.25	0.0531	-0.132	-1.09	1.22	0.304
0.441	-0.17	0.38	-1.12	1.3	0.647	2.62	0.327		2.04	-1.38	0.768	-1.1	0.345	0.436
0.715	-0.0309	0.934	-1.2	1.12	0.604	2.76	2.84		1.98	-0.481	0.515	-1.15	-0.63	0.236
0.685	-0.109	0.573	-1.29	0.6	1.25	2.37	1.49		-0.258	0.52	0.489	-1.18	0.402	-0.208
0.336	-0.265	0.884	-1.1	0.71	1.66	2.42	1.34		0.824	0.264	0.359	-1.35	0.608	-0.0201
0.544	0.51	0.713	-0.616	0.481	1.17	2.88	-0.183		0.683	0.544	0.19	-1.24	0.256	0.539
-0.414	0.765	0.163	-1.55	-0.0453	0.659	2.89	-0.53		-1.1	2.2	0.684	-0.985	2.94	0.753
0.311	0.62	0.671	-1.56	0.493	0.977	2.6	-0.0655		-1.16	0.833	0.814	-0.949	0.171	0.394
0.622	0.5	0.353	-1.06	1.07	1.19	2.55	-0.352		0.43	0.673	0.273	-0.951	0.234	0.205
0.468	0.956	0.246	-1	1.01	0.407	2.73	0.876		2.69	-0.484	0.779	-1.07	0.117	-0.417
0.441	1.19	0.345	-1.09	0.541	0.0854	2.98	1.85		0.728	0.763	1.06	-0.937	-0.519	-0.0343
0.0997	0.958	1.3	-1.65	-0.1	0.56	3.33	2.57		1.06	0.332	1.07	-0.913	0.0167	-0.5
0.205	0.89	0.319	-1.05	-0.435	0.849	3.32	-0.948		1.04	1.51	0.31	-0.883	0.333	-0.567
0.554	1.21	-0.223	-1.32	0.0427	0.829	2.87	1.09		0.163	0.731	0.71	-0.852	-0.562	-0.387
0.18	1.66	0.818	-0.591	1.26	0.772	2.87	1.2		1.3	-0.423	0.33	-0.776	0.224	-0.267
0.304	1.3	0.82	-0.502	1.8	0.374	3.21	0.00741		-0.0868	-0.104	1.04	-0.724	-0.511	-0.646
0.487	1.13	1.29	-0.346	0.814	0.359	3.51	-0.373		0.903	0.568	1.14	-0.772	0.355	-0.711
0.339	1.19	0.707	-0.931	0.108	0.336	3.48	0.067		1.52	0.694	1.85	-0.954	0.449	-0.31
0.607	1.21	1.01	-1.43	0.292	0.174	2.98	0.354		1.11	0.775	2.06	-1.06	0.825	-0.582
0.995	0.861	-0.0481	-1.41	0.188	0.31	2.43	0.622		1.08	0.276	1.83	-0.848	-0.217	-0.656
0.84	0.702	0.57	-1.07	0.535	0.742	2.86	1.34		0.388	-0.144	2.56	-0.657	0.638	-0.59
0.988	0.46	1.05	-1.18	0.509	0.704	3.41	1.65		0.379	0.527	1.81	-0.668	-0.103	-0.673
0.421	0.338	-0.155	-1.39	-0.335	0.127	3.16	1.58		-0.586	0.662	1.03	-0.84	0.444	-0.964
0.759	0.402	0.254	-0.576	-0.268	0.158	2.82	-0.0897		-0.819	0.228	1.45	-0.89	1.41	-0.51
0.573	0.376	0.796	-0.816	0.29	0.413	3.06	0.281		0.803	-0.356	0.982	-0.869	-0.24	-1.04
0.417	0.169	0.519	-0.805	0.381	0.358	3.25	0.216		1.19	-0.533	1.32	-0.891	-0.0894	-1.03
0.727	-0.0624	0.735	-0.629	0.275	0.248	2.95	0.1		2.01	-0.132	2.08	-0.782	0.557	-0.657
1.21	0.033	0.542	-1.06	0.412	-0.11	2.57	1.04		0.974	-0.749	2.57	-0.788	0.711	-0.299
0.628	-0.492	0.62	-1.09	0.686	-0.234	2.54	0.62		0.373	-0.698	1.44	-0.727	0.0472	-0.524
0.168	-0.0406	-0.845	-0.0576	0.248	0.232	2.53	-0.639		-0.0682	-0.993	1.28	-0.796	0.573	-0.643
0.365	-0.239	-0.547	-0.687	-0.325	0.579	2.08	-0.46		1.18	-0.972	1.31	-1.03	1.05	-0.358
0.316	-0.262	-1	-0.226	-0.202	0.702	2.33	0.361		2.26	-0.876	1.92	-1	0.334	-0.0684
1.25	-0.421	0.251	-0.593	-0.249	1.03	2.86	1.82		-0.0352	-0.949	2.2	-0.862	0.618	-0.553
0.726	-0.501	0.401	0.414	-0.423	1.16	2.77	-0.153		1.44	-0.22	1.36	-0.8	0.138	-0.707
0.152	-0.309	0.285	-0.0418	0.0177	0.823	2.48	0.325		0.722	-0.37	0.0899	-0.793	0.257	-0.953
0.714	-0.222	0.0279	-0.341	0.166	0.614	2.33	-0.553		1.71	0.268	1.76	-0.827	-0.535	-0.814
0.915	-0.427	-0.0542	-0.52	0.203	0.962	2.31	1.01		1.1	-0.461	1.17	-0.826	-0.446	-0.753
0.18	-0.426	-0.888	0.282	0.913	0.593	1.96	-0.0349		-0.0318	-0.289	-1.02	-0.741	-0.28	-0.13
-0.356	-0.497	-0.323	0.265	0.621	-0.0299	1.8	-0.0252		1.04	-0.21	1.04	-0.84	-0.338	-0.954
0.692	-0.313	0.511	-0.361	-0.132	0.0994	2.28	0.0671		0.618	1.52	1.35	-0.786	0.924	-0.44
0.189	-0.434	0.472	-0.457	0.283	0.491	2.83	-1.19		1.21	0.834	0.426	-0.958	0.106	-0.971
1.06	0.06	-0.565	-0.262	0.75	0.766	2.61	-0.248		1.41	1.3	0.977	-0.879	0.528	-1.05
0.955	0.107	-0.297	-0.277	0.438	0.915	2.5	-0.775		1.92	0.0874	-0.185	-0.985	-0.121	-1.15
0.951	0.376	-1.44	-0.23	0.362	0.325	2.92	0.285		1.16	0.117	-0.0597	-1.02	0.303	-1.22
0.445	0.239	-0.953	0.366	0.642	0.0684	3.03	0.985		0.0319	0.831	-0.62	-1.21	0.203	-0.57
0.85	0.158	-0.459	0.155	0.915	0.46	2.87	0.99		0.642	0.122	0.422	-1.09	0.6	-0.175
0.769	0.248	-0.28	0.16	0.981	0.844	2.75	-0.592		1.37	0.0842	0.764	-1.14	-0.0428	-0.293
0.586	0.0922	-0.438	0.0932	0.951	1.25	2.55	0.833		1.93	0.318	0.0889	-1.12	-0.254	-0.167
0.517	0.00337	0.44	-0.662	1.09	1.38	2.27	0.939		2.37	-0.394	0.569	-1.15	-0.249	-0.633
0.386	-0.0174	-0.0335	-0.584	0.937	1.41	2.07	1.34		1.76	-1.1	2.08	-1.01	-0.653	-0.161
0.871	-0.511	-0.748	-1.65	0.27	1.46	2.22	0.413		3.21	-0.0675	0.746	-1.03	-0.524	-0.563
0.708	-0.307	-0.898	-0.618	0.318	1.32	2.62	-0.81		2.25	-0.615	1.39	-1.09	1.07	-0.552
0.474	-0.501	0.143	-0.578	0.91	1.32	2.43	-0.272		0.811	-0.249	-0.494	-0.735	-0.0685	-0.57
0.485	-0.521	-0.307	-1.14	0.638	1.39	1.89	0.836		1.72	-0.173	0.451	-0.682	-0.741	-0.601
0.471	-0.481	-0.305	-0.473	0.0852	1.56	1.52	-0.218		1.44	0.791	0.211	-0.443	-0.286	-0.62
-0.0978	-0.435	-0.375	0.0827	0.592	1.69	1.72	-1.09		1.66	1.15	0.768	-0.526	0.837	-0.631
0.91	-0.0935	-0.518	-0.0558	1.11	1.85	1.76	0.548		1.99	1.29	0.796	-0.546	-0.0828	-0.749
0.157	0.207	-1.02	-1.3	0.75	1.59	1.76	1.12		1.12	-1.45	0.837	-0.505	-0.441	-0.385
0.244	1.35	-1.08	-1.56	0.64	0.974	1.8	0.338		0.755	-0.394	-0.129	-0.639	-0.345	-0.535
0.382	1.5	-1.25	-0.801	0.836	0.538	1.75	2.42		0.502	-0.283	0.116	-0.638	-1.24	-0.651
0.164	1.68	-0.474	-1.14	0.902	0.353	1.76	3.18		0.786	0.392	0.675	-0.85	-0.545	-0.668
0.859	1.37	-0.36	-0.0546	0.649	0.386	1.63	0.73		2.6	0.288	-0.0259	-0.734	1.34	-0.902
0.401	1.07	0.356	0.044	0.365	0.944	1.71	0.959		1.64	1.56	-0.402	-0.689	0.968	-0.746
0.716	0.904	0.357	-0.155	0.547	1.1	1.59	1.76		1.32	1.13	-1.05	-0.735	-0.401	-0.554
-0.056	0.583	-0.219	-0.449	0.696	0.758	1.28	0.788		1.16	0.562	-0.602	-0.534	0.147	-1.11
0.635	0.477	0.139	-0.772	0.702	0.642	1.53	-1.08		0.767	0.387	0.935	-0.639	0.495	-0.507
0.385	0.541	0.249	-0.991	0.385	0.663	1.8	0.357		0.231	0.535	0.0998	-0.535	-0.0646	-0.892
0.0661	0.709	-0.0521	-1.13	0.0241	0.848	1.65	0.461		0.705	0.0575	0.508	-0.647	0.599	-0.707
0.706	0.682	0.346	-0.915	-0.369	1.07	1.53	-0.279		0.209	-0.391	1.56	-0.498	0.451	-1.1
0.0215	0.235	0.22	-0.84	-0.92	0.944	2.19	-0.194		0.486	0.219	0.871	-0.543	0.725	-1.02
0.611	0.728	-0.0518	-1.38	-1.08	0.855	2.87	0.0842		0.7	-0.106	0.696	-0.616	-0.607	-0.388
-0.181	0.747	0.0905	-0.372	-0.726	0.615	2.92	0.139		0.763	-0.802	0.468	-0.524	0.786	-0.311
0.368	0.459	-0.191	0.0102	-0.0528	0.094	2.55	1.12		-0.215	-1.22	-0.00265	-0.541	-0.143	-0.467
0.106	0.51	-0.887	-0.883	0.226	0.635	1.76	1.71		1.42	-0.52	1.64	-0.571	0.431	0.152
0.397	0.353	-1.07	-0.0824	-0.475	1.06	1.4	0.139		2.11	-1.46	0.406	-0.731	-0.206	0.139
0.158	0.549	-1.3	0.166	-0.84	0.458	2.1	0.306		1.95	-0.658	0.698	-0.711	0.43	0.208
0.267	0.894	-0.924	0.0762	-0.428	-0.0304	2.43	1.4		1.89	-0.75	-0.423	-0.672	0.28	0.269
0.0128	1.21	-0.00118	-0.17	0.24	0.187	1.9	0.659		0.427	0.362	0.507	-0.68	-0.95	-0.133
0.274	1.1	0.0747	-0.514	0.0232	0.331	1.75	-0.029		0.824	-0.472	1.31	-0.568	-0.194	-0.684
0.0155	0.886	0.123	1.38	-0.602	0.357	2.15	0.0873		1.19	-0.807	1.16	-0.624	0.985	-0.0446
0.5	0.711	0.375	0.69	-0.299	0.628	1.94	-0.262		0.689	-0.164	-0.494	-0.684	1.24	0.0429
0.654	0.696	-0.351	0.481	-0.382	0.527	1.27	1		-0.431	0.466	-0.422	-0.802	0.493	-0.0333
0.71	0.478	0.345	-0.876	-1.23	-0.0262	1.27	0.398		-0.000425	-0.566	0.0244	-0.719	0.143	0.0611
1.05	0.445	0.293	-0.758	-1.32	0.293	1.48	0.19		2.18	-0.319	-1.07	-0.717	-0.499	-0.0327
1.01	0.178	-0.281	1.15	-0.793	1.05	1.65	1.58		1.13	-0.572	0.504	-0.839	-0.117	0.497
0.902	0.144	-1.19	-0.16	-0.117	0.98	1.71	2.93		1.3	-0.876	-0.511	-0.77	1.11	0.476
1.11	-0.0641	-0.0912	0.537	0.197	0.628	1.56	-0.421		0.54	0.369	0.654	-0.761	0.414	0.0459
1.35	-0.0265	-0.128	-0.605	0.0284	1.16	1.39	0.415		0.213	0.0745	0.929	-0.835	-0.864	-0.4
1.23	0.0387	-0.366	0.875	-0.12	1.73	1.55	0.453		0.445	-0.758	0.687	-0.966	1.17	-0.637
1.28	-0.092	-0.342	0.31	-0.488	2.33	1.44	-0.67		0.0893	-1.79	0.524	-1.01	0.65	-0.773
0.699	-0.0555	-0.647	0.444	-0.927	2.51	0.775	0.457		1.17	-1.14	-0.05	-1.13	0.494	-0.639
0.779	-0.159	-0.351	-0.696	-0.602	2.15	0.674	0.931		1.27	-0.821	1.15	-0.829	-0.358	-0.458
0.92	0.0287	-0.366	0.394	0.00999	1.72	1.27	2.84		1.08	-0.273	1.35	-0.734	0.368	-0.803
0.961	-0.0333	-0.191	-0.213	-0.0742	1.66	1.55	-0.65		0.295	-1.23	0.618	-0.657	-0.625	-1.02
1.09	-0.48	0.238	-0.0587	-0.403	1.69	1.31	0.305		-1.19	-0.582	1.82	-0.594	0.507	-1.02
0.919	-0.44	0.352	-0.783	-0.383	1.06	1.18	-0.462		-3.01	-0.984	1.14	-0.711	1.99	-0.563
1.18	-0.159	-0.602	0.439	-0.653	0.923	1.33	0.548		-1.26	-0.824	1.09	-0.639	-1.87	-0.587
0.908	-0.5	-0.202	-0.816	-0.994	1.15	1.29	0.457		-0.776	0.118	1.39	-0.608	-1.08	-0.537
0.886	-0.412	-1.16	-0.168	-0.482	1.09	1.16	0.647		-1.08	0.579	1.25	-0.803	-0.801	-0.139
0.548	0.0519	-0.356	0.156	-0.0573	0.762	1.3	-0.555		-1.07	-0.165	0.674	-0.948	0.465	-0.588
0.897	0.125	0.104	-0.445	-0.414	0.594	1.24	-0.341		0.17	-1.84	1.29	-0.892	-0.00968	-1.01
0.73	0.0685	-0.265	0.601	-0.738	0.758	1.46	0.12		0.502	-1.71	2.21	-0.944	-0.909	-0.823
0.723	-0.0946	0.0226	-0.368	-0.814	0.453	1.76	-1.56		0.169	-1.08	0.514	-1.07	0.0625	-0.975
0.409	0.283	-0.232	-1.04	-0.769	-0.175	1.31	1.33		-0.285	0.392	0.629	-0.943	1.06	-0.637
1.11	0.546	-0.872	-0.0476	-0.538	-0.135	0.929	0.283		0.206	0.155	1.19	-0.888	0.0153	-0.431
0.84	0.54	-0.729	-0.486	-0.201	0.366	1.04	0.248		1.74	-1.18	1.16	-1.03	0.149	-0.398
1.27	0.68	-0.775	-0.803	-0.0388	0.355	1.25	1.38		-1.2	0.491	0.72	-1.04	0.954	-0.551
0.851	0.652	-0.925	-0.728	-0.153	-0.0733	1.65	2.07		-0.507	-0.211	0.533	-1.16	-0.301	-0.462
0.575	0.495	-0.584	-0.746	-0.57	0.13	1.31	1.99		-1.09	-0.784	-0.291	-1.14	0.215	-0.688
0.258	0.324	-0.337	-0.266	-0.946	0.583	0.6	-0.247		-0.385	-0.296	-0.404	-1.08	0.884	-0.125
0.692	0.0924	0.507	-0.76	-0.738	0.149	0.892	1.51		-0.182	0.15	0.719	-1.14	0.458	-0.716
0.504	-0.22	0.227	-0.472	-0.305	-0.339	1.45	-0.221		-1.31	-0.408	0.158	-0.913	0.646	-0.693
0.615	0.132	-0.254	-0.15	-0.149	-0.0452	1.3	-0.35		0.321	-0.495	0.284	-0.979	1.02	-0.919
0.297	0.0786	0.216	-0.468	-0.0974	0.694	1.3	1.41		0.802	1.4	-0.56	-1.13	0.489	-0.655
1.2	-0.16	0.96	-0.156	0.226	0.757	1.55	0.414		-0.236	0.807	0.469	-1.08	-0.775	-0.584
1.05	-0.32	0.634	-0.993	0.0802	0.26	1.18	0.289		-0.454	0.6	0.166	-0.77	-0.134	-0.334
0.808	-0.435	0.714	-1.16	-0.252	0.264	1.21	0.425		-0.268	-0.378	0.803	-0.905	0.589	-0.376
0.589	-0.742	-0.459	-1.04	-0.36	0.301	1.87	0.0226		0.226	-1.27	0.478	-0.799	1.51	-0.494
1.04	-0.654	-0.0598	-0.896	-0.232	-0.164	1.5	2.93		-0.585	-2.18	0.0977	-0.658	2.49	-0.0382
0.537	-0.497	0.343	-0.561	-0.0968	-0.406	1.05	1.23		0.0597	-1.1	0.904	-0.971	0.574	1.07
0.136	-0.599	-0.81	-0.545	-0.302	0.221	1.47	-0.613		-0.00188	-0.00495	0.352	-0.812	0.448	0.432
0.772	-0.711	0.515	-0.928	-0.345	0.934	1.71	0.424		0.479	-0.0383	0.556	-0.623	-0.71	0.923
0.489	-0.738	-0.124	-0.581	-0.195	0.764	1.45	0.537		-1.37	-0.254	0.387	-0.932	0.0439	0.382
0.876	-0.558	0.0162	-0.813	-0.384	0.404	1.45	0.91		-0.581	-0.918	1.14	-0.973	-0.67	0.177
0.291	-0.227	-0.197	-0.644	-0.158	0.0879	1.99	0.609		-0.301	0.478	1.59	-1.02	-0.19	0.023
0.447	-0.636	-0.271	-0.429	-0.296	0.0452	2.6	2.96		0.107	-0.871	1.39	-0.918	-0.537	0.329
0.804	-0.172	-1.19	-0.0868	-0.799	0.499	2.92	0.276		-0.893	-0.134	0.143	-1.02	-0.00911	0.38
1.05	-0.291	-0.859	-0.44	-0.915	0.542	2.88	0.587		0.373	-0.642	0.999	-1.08	1.12	-0.0936
0.907	-0.269	-0.26	-0.756	-0.413	0.101	2.58	1.31		1.19	-0.143	0.354	-0.95	-0.23	-0.441
0.366	-0.383	0.163	-0.536	0.168	0.0379	2.33	-0.434		1.95	-0.187	-0.0191	-0.899	-0.258	-0.368
0.385	0.331	-0.0367	-1.02	0.432	0.0881	2.41	0.367		0.294	-0.576	0.329	-0.908	0.453	-0.113
0.944	0.34	-0.614	-0.19	0.141	-0.357	2.37	1.1		0.773	-0.56	0.707	-1.2	0.822	0.209
-0.00973	0.227	0.788	0.157	-0.457	-0.465	2.14	0.135		0.986	-0.703	0.672	-0.861	-0.259	-0.535
0.426	0.186	0.268	-0.246	-0.469	-0.223	2.29	0.196		1.23	-0.637	0.716	-0.8	-0.12	-0.242
1.07	0.342	-1.06	-0.0594	0.00427	0.243	2.6	1.16		0.67	-0.311	0.0503	-0.8	0.174	-1.14
0.641	-0.0307	0.441	-0.804	-0.0981	0.423	2.45	1.25		0.57	0.388	-0.423	-0.881	0.424	-0.304
0.599	0.0702	-0.212	-0.0557	0.0667	0.217	1.97	1.3		0.984	0.821	0.769	-0.842	0.462	-0.528
-0.0599	-0.0403	0.387	0.398	0.547	-0.0618	1.63	0.675		0.761	1.49	-0.416	-0.959	1.4	-0.583
0.0411	0.17	0.417	0.303	0.8	-0.405	1.85	0.369		0.0179	-0.522	0.837	-0.918	-0.316	-0.574
0.422	0.462	0.0218	0.251	1.1	-0.132	1.74	1.98		1.11	-0.505	0.737	-1.05	-0.61	-0.418
1.29	0.727	0.194	-0.421	0.968	0.579	1.29	1.44		0.724	0.609	0.321	-0.965	-0.203	-0.637
0.144	0.706	-0.203	-0.307	0.688	0.856	1.42	1.59		-1.64	1.4	-0.104	-0.945	0.256	-0.268
0.554	1.12	-0.632	0.333	0.549	0.988	1.74	2.52		-0.37	1.23	-0.315	-0.972	-0.379	-0.329
0.682	1.06	0.214	0.0518	0.417	0.715	1.55	0.937		-1.34	1.17	0.323	-0.989	-0.176	-0.0957
0.719	1.44	0.56	-0.157	0.554	0.198	1.33	-1.35		0.077	0.211	0.986	-0.758	-0.285	-0.351
0.536	1.13	0.309	0.485	0.156	0.208	1.81	-1.13		1.27	0.637	0.871	-0.811	0.0846	0.142
0.253	0.936	-0.87	-0.739	-0.268	0.63	1.81	-0.474		0.68	0.68	0.08	-0.888	-0.517	0.596
0.368	1.68	0.983	-0.0635	-0.0772	0.466	1.36	0.742		-0.3	-0.133	0.66	-0.721	-1.13	0.372
0.346	2.04	-0.37	0.0246	0.498	-0.0451	1.56	-0.236		0.499	-0.0424	0.578	-0.68	-0.012	0.407
0.579	2.25	-0.121	0.505	-0.0122	0.33	1.86	0.828		-1.03	0.77	0.542	-0.897	0.425	0.435
0.526	2.05	0.278	0.447	-0.306	0.786	1.54	1.71		-0.339	-0.9	-0.512	-0.835	-0.679	0.842
0.328	2.02	0.56	0.604	0.951	0.444	1.89	2.22		0.94	0.178	1.35	-0.739	-0.122	0.318
0.233	1.94	-0.065	-0.0052	1.96	0.408	2.35	2.44		-0.264	0.146	1.1	-0.792	1.05	0.178
-0.734	1.88	0.127	0.383	1.45	0.801	2.3	0.923		-0.108	0.649	2.15	-0.923	-0.117	0.421
0.21	1.58	0.135	-0.151	0.924	0.906	2	1.43		-1.08	0.37	1.27	-0.962	-0.0799	0.399
-0.832	2.03	0.356	0.191	0.707	0.795	1.67	3		-1.5	-0.288	0.814	-1.04	0.849	0.423
-0.669	2.11	-0.461	0.145	0.664	0.722	1.73	-0.396		-2.08	1.52	1.21	-1.02	-0.368	0.67
-0.597	2.51	0.443	0.348	0.553	0.747	1.71	2.19		-0.109	0.659	0.218	-0.82	0.953	0.149
-0.374	3.69	0.127	0.0139	0.147	0.697	2.01	1.61		-0.575	0.517	-0.276	-0.846	1.46	-0.404
-0.96	3.38	1.04	0.333	0.376	0.245	2.17	1.28		-0.176	0.54	-1.35	-0.747	0.583	-0.53
-0.6	3.09	1.29	0.266	0.762	0.0753	1.92	2.41		-0.787	0.479	-0.905	-0.731	0.555	-0.309
-0.954	3.38	0.452	0.441	0.464	0.197	1.77	0.318		0.523	0.268	0.193	-0.838	0.692	-0.429
-0.473	3.46	0.893	0.276	0.279	0.594	1.98	1.38		0.412	1.52	-0.315	-1	1.12	-0.91
-0.936	4.08	0.951	0.562	0.471	0.817	2.25	-0.0843		0.224	0.00522	-0.226	-0.98	0.603	-1.08
-0.867	4.8	0.781	0.08	0.56	0.562	2.13	-0.382		-0.717	0.463	-0.5	-1.1	0.524	-0.469
-0.621	4.54	0.682	0.395	0.824	0.304	1.87	0.404		-0.135	0.204	0.625	-1.03	1.03	-0.609
-0.789	4.6	0.0743	0.629	1.16	0.429	1.77	0.322		-0.0729	0.896	0.852	-1.02	0.744	-0.59
-0.666	4.25	0.722	0.562	0.557	0.315	2.06	1.4		-0.267	-0.231	0.143	-0.958	0.107	-0.762
-0.226	4.24	0.0528	0.377	0.173	-0.0267	1.79	-0.728		-0.379	-0.0868	0.251	-0.762	-0.199	-0.196
-0.904	4.15	1.37	0.99	0.86	-0.397	1.67	1.21		0.0736	-0.0721	1.03	-0.857	0.839	-0.0569
-0.929	3.76	0.671	0.423	0.895	0.0581	2.2	0.452		0.718	-0.486	-0.0224	-0.777	0.235	-0.664
-1.06	3.95	0.643	-0.487	0.296	0.461	2.41	2.31		-0.675	-1.19	0.295	-0.84	-0.617	-0.396
-0.812	3.31	-0.0245	0.446	0.629	0.251	1.82	0.516		-1.55	0.933	-0.883	-0.712	0.783	-0.331
-0.622	3.47	0.297	-0.595	1.18	0.0567	1.43	2.2		-0.0507	0.932	0.235	-0.777	-0.246	-0.618
-0.945	3.04	0.29	0.299	0.656	-0.0694	1.6	1.83		0.479	1.94	1.11	-0.998	-0.219	-0.417
-0.656	2.57	1.13	-0.0125	0.421	-0.385	1.66	1.27		-0.911	2.96	0.667	-1.06	-0.505	-0.163
-0.242	2.55	1.5	-0.0846	0.714	-0.394	1.3	0.818		-0.651	1.58	1.85	-0.79	0.0999	-0.482
-0.836	2.25	1.74	-1.04	0.195	-0.178	1.03	1.22		-0.6	1.3	-0.274	-1.03	-0.337	-0.57
-0.985	1.95	2.22	-1.03	-0.538	-0.055	1.31	0.589		-0.556	0.352	1.49	-0.992	-0.839	-0.297
-1.05	1.78	1.71	-0.309	-0.353	-0.138	1.64	1.32		-0.113	0.805	0.923	-0.932	-0.949	-0.0384
-0.833	1.74	2.05	-0.746	0.263	-0.0889	2.02	0.199		0.506	1.12	1.55	-0.965	-0.833	-0.0898
-1.52	1.31	1.36	-0.983	0.486	0.448	2.39	-0.0975		0.381	-0.145	0.318	-1.07	0.224	-0.596
-1.37	1.26	1.39	-0.931	0.423	0.6	2.3	-1.27		1.31	2.16	-0.753	-1.1	0.359	-0.605
-1.53	1.56	1.45	-0.537	-0.0222	0.761	1.89	0.332		-0.969	2.06	1.09	-0.967	-0.417	-0.885
-1.32	1.69	1.57	-1.67	-0.0577	1.31	1.84	0.66		0.362	1.42	0.538	-0.915	1.04	-0.642
-1.33	2.47	1.34	-1.2	0.546	1.74	1.74	-0.656		0.705	1.45	1.26	-0.983	-0.592	-0.666
-1.39	2.82	1.9	-1.27	0.782	2.25	1.32	0.619		0.767	1.16	1.09	-0.996	0.0902	-0.725
-1.95	2.84	1.95	-0.872	0.279	2.76	1.17	-0.134		0.36	0.589	0.0506	-1.17	-1.06	-0.704
-1.79	2.75	1.33	-1.35	0.32	2.95	1.35	2.07		-0.102	-0.116	1.57	-1.27	-0.354	-0.648
-1.53	2.61	1.27	-1.45	0.782	3.06	1.54	0.365		0.0911	1.03	1.44	-1.11	-0.472	-0.665
-1.91	2.59	1.67	-1.06	0.879	3.07	1.63	-0.291		0.665	1.23	1.42	-1.18	-1.43	-0.773
-1.84	2.32	2.64	-1.31	0.7	2.75	1.6	1.01		1.54	0.342	1.31	-1.26	-0.383	-0.56
-1.19	2.94	1.52	-1.29	0.229	1.99	1.5	1.54		1.11	0.711	1.31	-1.02	-0.695	0.499
-2.22	3.01	0.752	-1.01	-0.135	1.9	1.85	0.478		1.3	1.23	1.29	-1.03	-0.37	0.272
-1.87	3.04	0.504	-1.89	0.014	2.27	2.21	-0.0605		0.182	-0.0486	0.439	-0.877	-0.216	0.485
-1.57	3.15	0.653	-1.16	0.578	2.24	2.06	0.0916		0.594	-0.0264	0.445	-0.87	-0.643	-0.129
-1.57	2.38	-0.0182	-1.37	1.14	2.01	2.4	0.81		0.202	-0.00269	0.562	-0.889	0.273	0.372
-1.74	2.52	0.429	-1.27	0.654	1.94	2.61	0.565		1.39	-0.524	0.025	-0.814	0.903	0.313
-1.73	2.57	0.72	-0.79	0.145	1.57	2.29	1.46		-0.866	-0.114	0.0995	-0.815	-0.948	0.794
-1.86	1.95	0.881	-1.47	0.552	1.08	2	0.467		0.474	-0.25	-0.544	-0.985	-0.413	0.736
-1.04	2.4	1.28	-1.24	0.982	1.36	1.72	2.14		0.244	-0.433	0.959	-0.928	0.955	0.252
-1.29	2.07	0.984	-1.6	1.07	1.52	1.43	1.91		-0.267	0.0727	1.92	-0.863	-0.962	0.246
-1.86	1.73	1.5	-0.584	0.642	1.15	1.46	0.577		0.803	-0.179	1.27	-0.765	-0.0138	0.721
-1.67	1.64	0.782	-0.449	0.375	1.24	1.82	1.34		-0.329	-0.323	1.36	-0.889	0.371	0.788
-1.49	1.47	1.42	-0.549	0.803	1.55	1.95	0.903		1.79	0.755	-0.374	-1.07	-0.228	0.899
-1.5	1.24	1.18	-0.94	1.08	1.47	1.6	0.835		-0.465	0.161	0.684	-0.852	-0.107	0.504
-1.68	1.24	1.74	-0.762	0.558	1.19	1.63	1.27		0.287	-0.0113	-0.629	-0.81	-1.36	1.1
-2.15	0.982	0.8	-1.52	0.535	0.811	1.82	2.25		1.53	0.382	-1.97	-0.819	-1.15	1.26
-1.24	0.887	1.29	-1.47	0.878	0.601	1.44	1.62		-0.572	1.2	0.443	-0.883	-0.88	1.41
-1.77	1.23	1.68	-2	0.913	1.16	1.36	1.77		-0.858	0.744	-1.26	-0.865	-0.758	1.51
-1.71	1.36	1.29	-1.17	1.08	1.3	1.8	0.942		-0.44	-0.44	-0.107	-0.768	-0.742	1.39
-1.52	2.46	2.12	-1.04	0.709	0.53	1.53	0.473		0.589	-0.0928	-1.34	-0.998	-0.2	2.33
-1.37	2.25	1.55	-1.39	0.463	0.378	1.41	1.43		1.37	0.36	-0.539	-0.819	0.19	1.54
-1.21	2.59	2.53	-0.574	0.501	0.716	1.58	0.584		0.696	0.156	-0.147	-0.829	-0.378	1.19
-1.22	1.79	1.62	-1.21	0.295	0.625	1.48	0.0036		-0.177	0.223	-0.592	-0.982	-0.131	1.44
-1.19	1.94	1.56	-1.54	0.123	0.178	1.44	-0.531		0.849	-0.105	-0.727	-0.871	-0.739	1.47
-0.92	1.65	1.04	-1.25	0.173	-0.19	1.68	0.212		-0.621	0.324	0.242	-0.693	-0.218	1.1
-1.84	2.12	0.447	-1.84	0.327	0.00409	2.2	-1.02		1.24	0.559	-0.891	-0.831	-0.739	1.48
-1.83	2.41	0.74	-1.31	0.775	0.759	2.23	0.489		0.98	-0.274	0.73	-0.976	0.0818	2.13
-1.2	2.35	0.537	-2.04	1.38	0.841	2.11	0.744		0.953	0.39	0.128	-0.707	-0.389	1.99
-1.33	2.47	1.43	-1.33	0.785	0.25	2.43	1.66		0.776	-0.757	2.05	-0.993	-0.301	1.7
-1.61	2.53	1.12	-0.898	-0.0397	0.284	2.77	-0.451		0.797	-1.19	0.235	-0.942	-0.376	1.73
-1.24	2.44	0.298	-1.44	0.177	0.58	3.05	0.78		1.22	-2.59	0.14	-0.85	-0.332	1.87
-1.32	2.68	0.607	-1.15	0.342	0.284	3.49	0.0975		0.454	-0.659	-0.248	-0.92	-0.292	1.79
-1.01	2.28	1.33	-1.27	0.046	0.381	3.34	-0.657		0.227	-0.847	-0.261	-0.93	0.249	1.03
-1.65	1.87	0.758	-1.59	-0.238	0.793	3	1.25		0.641	-0.92	1.85	-1.08	-1.05	1
-1.18	1.95	0.795	-1.81	-0.00997	0.891	2.98	0.708		0.437	-0.398	1.15	-1.01	-1.11	1.69
-1.25	1.83	0.821	-1.44	0.212	0.72	2.74	0.975		-0.285	-1.09	0.197	-0.983	-0.867	0.8
-1.56	1.43	0.62	-0.788	0.305	0.845	2.57	1		0.208	-0.31	-0.912	-1.16	0.348	0.917
-1.27	1.1	1.35	-0.658	0.261	1.06	2.73	-0.288		0.561	-0.807	0.934	-1.06	-0.96	0.523
-1.23	1.61	1.13	-1.06	-0.298	1.37	2.78	-0.812		0.144	0.319	-0.404	-1.27	-0.398	0.755
-1.36	1.66	1.8	-0.988	-0.509	1.39	2.64	-0.605		-0.176	0.432	0.376	-1.1	-0.556	0.812
-0.886	2.46	0.597	-0.36	-0.202	1.22	2.67	-0.578		0.0417	-2.02	-0.0388	-1.16	-0.949	0.316
-1.46	2.89	1.46	0.719	0.00139	1.04	2.57	-0.0419		0.981	-1.06	0.539	-1.24	-1.23	0.156
-1.19	2.99	1.11	-0.271	-0.219	0.622	2.59	2.05		0.737	-0.615	0.0264	-0.981	-1.91	0.542
-1.62	2.66	1.1	-0.592	0.126	0.367	2.3	0.751		-0.164	-0.821	0.797	-0.903	-0.0921	0.227
-1.65	2.87	0.518	0.347	0.339	0.637	2.71	2.87		-0.245	-0.308	0.699	-0.763	0.0948	0.25
-1.62	2.64	0.7	-0.593	-0.0619	1.07	2.84	1.56		0.881	-0.572	0.61	-0.86	-0.321	-0.0863
-1.03	2.58	0.433	-0.00629	-0.216	1.32	2.17	-0.297		0.75	-0.258	1.38	-0.848	0.275	0.00615
-1.38	2.09	1.21	0.221	-0.193	1.18	1.91	0.705		0.897	-0.878	1.65	-0.89	-0.0177	-0.124
-1.75	2.01	0.996	0.06	-0.404	0.772	2.15	0.323		-0.158	-0.695	0.777	-0.817	-0.542	0.108
-1.41	1.84	1.43	-0.508	-0.216	0.388	2.07	0.82		0.833	0.81	1.15	-0.854	0.0335	0.67
-1.34	2.05	0.598	-0.0661	-0.112	0.0539	1.75	1.46		-1.03	-1.18	1.2	-0.896	1.49	0.157
-1.4	1.54	0.618	-1.18	0.0909	0.301	1.63	1.75		0.332	-0.654	0.303	-0.916	1.07	0.41
-1.67	1	1	0.627	0.113	0.658	1.97	0.439		0.743	-1.17	0.266	-0.937	0.443	-0.016
-1.93	1.02	0.485	0.762	-0.609	0.296	1.94	-0.0513		1.51	-1.35	0.652	-0.825	0.84	-0.41
-0.717	1.06	-0.0544	0.514	-1.01	-0.0624	1.74	-0.703		0.224	-1.11	-0.0124	-0.914	0.802	-0.516
-1.43	0.762	1.18	0.133	-0.919	0.242	1.77	0.607		-0.226	-2.45	1.02	-0.843	0.694	-0.039
-1.11	0.863	1.47	-0.875	-0.663	0.251	1.66	1.15		0.575	-0.0262	1.26	-1.08	1.29	-0.134
-1.4	1.09	0.385	-0.298	-0.568	-0.0934	1.7	1.23		0.0974	-0.663	0.315	-0.999	0.334	-0.199
-1.24	1.05	0.36	0.257	-0.0984	-0.282	2.06	0.919		0.712	-0.693	1.73	-0.975	0.288	0.172
-1.42	1	-0.0549	-0.481	0.0688	-0.109	1.98	1.08		-0.646	0.0573	1.7	-0.927	0.604	0.34
-1.42	0.975	0.435	0.948	-0.207	0.285	1.54	-0.669		-0.192	-0.169	0.494	-0.798	1.62	0.179
-1.16	0.529	0.346	-0.338	-0.744	0.492	1.46	1.31		0.0595	-0.745	2.11	-0.836	1.25	0.108
-1.27	0.472	-0.124	-0.216	-1.52	0.456	1.87	0.323		-0.0234	0.332	-0.425	-0.999	0.444	0.0481
-0.967	0.684	0.449	0.637	-1.35	0.433	2.06	2.6		2.25	1.36	-0.0999	-1.15	0.477	0.142
-1.57	0.412	0.534	0.451	-0.418	0.229	1.44	1.33		0.019	0.868	0.264	-1.07	0.452	-0.0383
-1.38	0.55	0.863	0.286	-0.41	-0.0478	1.31	-0.442		-0.934	0.981	1.52	-0.95	1.32	0.274
-0.755	0.659	0.256	-0.0301	-1.04	0.056	1.84	1.75		-0.286	-0.237	0.811	-1.34	1.3	-0.649
-1.42	1.02	1.33	0.761	-0.98	0.249	1.49	2		0.125	-0.987	-0.431	-1.1	1.14	-0.0739
-0.674	0.44	1.77	1.13	-0.163	0.384	0.872	1.66		0.845	0.479	0.238	-1.07	0.555	0.217
-1.51	0.657	1.46	1	-0.109	0.601	1.04	0.142		1.28	-1.02	1.48	-1.13	0.213	-0.104
-1.18	0.7	1.34	1.35	-0.83	0.541	1.24	1.05		-0.856	0.405	0.703	-1.09	-0.378	-0.937
-1.04	0.359	0.838	0.75	-1.26	0.183	0.975	1.66		-1.15	-0.185	0.161	-1.09	1.89	-0.889
-0.641	0.908	0.862	1.29	-0.947	0.535	1.1	0.693		0.639	-0.729	0.387	-1.11	0.975	-0.8
-0.74	1.24	1.05	1.92	-0.341	1.03	1.57	0.654		-0.0135	0.523	0.82	-1.12	0.355	-1.08
-0.753	1.56	1.6	2.01	-0.259	0.708	1.45	0.824		-0.28	0.259	0.955	-1.12	0.926	-0.744
-1.06	1.09	1.93	1.11	-0.632	0.264	1.06	0.103		0.584	0.5	0.263	-1.01	0.549	-0.611
-0.618	1.08	1.33	-0.032	-1.01	0.746	1.15	0.663		0.91	0.397	0.851	-1.06	-0.592	-0.674
-1.01	0.553	0.175	-0.924	-0.967	1.16	1.21	0.569		0.318	-0.0815	-0.0274	-1.15	0.123	-0.215
-0.563	0.676	0.344	-0.805	-0.356	0.714	1.09	0.226		-1.2	-1.14	1.27	-1.01	0.466	-0.405
-0.958	0.768	0.365	0.795	0.0219	0.394	1.84	0.577		-1.47	-1.53	-0.29	-0.894	-0.0535	-0.0645
-0.597	1.09	0.34	0.934	-0.0867	0.659	2.2	-0.379		-0.951	-0.718	0.0373	-1.28	-0.563	-0.501
-0.791	0.548	0.483	1.19	-0.179	0.705	1.91	2.21		2.12	-0.99	0.588	-1.19	-0.575	0.0449
-0.378	0.638	0.23	-0.516	-0.214	0.358	2.11	0.593		-0.141	0.318	0.992	-1.19	-0.0221	-0.0518
-0.453	1.12	1.03	-0.683	-0.491	-0.0345	2.09	0.182		0.786	-0.083	1.21	-1.1	1.95	0.167
-0.0105	1.21	0.445	-0.874	-0.811	0.0406	1.51	-0.112		1.01	0.684	0.735	-0.972	0.394	-0.00155
0.611	1.07	0.281	-0.49	-0.538	0.25	1.42	0.852		0.461	-0.173	0.134	-1.22	2.04	-0.309
0.546	1.47	0.336	0.595	-0.349	0.236	1.9	0.00594		-0.104	0.583	0.872	-0.974	1.01	0.0231
0.234	1.28	0.0402	0.141	-0.275	0.439	1.92	-0.0994		-0.169	0.181	-0.0621	-1.26	0.277	0.561
0.521	1.27	0.619	0.851	0.126	0.596	1.57	0.815		1.12	0.356	1.11	-1.31	0.296	0.0694
0.599	1.5	0.977	-0.0284	0.0571	0.385	1.61	1.9		2.25	0.323	1.21	-1.12	0.224	0.048
0.34	1.33	0.721	0.588	-0.445	0.0861	1.32	1.32		-0.00578	0.0642	0.605	-1.31	1.57	-0.0462
0.378	1.47	1.6	0.532	-0.917	0.346	0.548	-0.302		1.09	-0.914	1.22	-1.19	1.12	-0.918
0.835	1.7	0.817	-0.39	-0.929	0.013	0.921	1.51		1.54	-0.546	-0.174	-1.2	0.0808	-1.32
0.481	1.48	-0.422	-0.0411	-0.485	-0.54	1.65	0.954		-0.217	0.695	0.22	-1.07	0.879	-0.62
0.209	1.85	-0.394	-0.382	-0.00618	-0.281	1.58	0.592		1.47	-0.0714	0.347	-1.19	0.674	-0.767
0.0594	0.975	-0.459	0.0339	-0.0695	-0.0429	0.945	0.528		-1.08	-0.633	0.468	-1.3	0.402	-0.0703
0.942	1.02	0.507	-0.416	-0.614	0.0927	0.63	-0.613		-0.275	-0.81	0.324	-1.22	-0.248	-0.679
0.716	0.795	0.669	-0.198	-0.376	0.298	0.941	1.65		-1.01	-0.613	-0.584	-1.12	0.231	-0.92
1.15	0.544	-0.332	-1.11	-0.206	0.0859	1.21	0.737		0.132	-0.2	-0.846	-1.24	1.49	-0.728
0.454	0.488	0.134	-0.188	-0.297	-0.218	0.893	2.18		-1.4	-0.67	0.713	-1.26	0.33	-0.393
0.343	0.373	0.0446	-0.712	-0.226	0.0119	0.49	0.332		-1.18	-1.09	1.37	-1.26	0.135	-0.897
-0.139	0.26	-0.478	0.0741	-0.352	0.256	0.321	0.148		-0.0877	-0.738	0.879	-1.14	0.0953	-0.762
-0.267	0.196	-0.19	0.133	-0.371	-0.128	0.394	0.896		-0.347	-1.5	1.66	-1.25	0.309	-0.124
0.271	-0.0384	-0.864	-0.326	-0.108	-0.271	0.795	0.907		0.65	-0.652	0.791	-1.45	0.189	-0.0943
0.249	0.113	-0.573	-0.569	-0.166	-0.118	1.09	1.13		-0.438	0.898	1.69	-1.18	1.44	-0.555
0.281	0.503	-0.85	0.249	-0.093	0.153	1.24	-0.357		-0.806	-0.0451	0.371	-1.14	1.86	0.0118
0.414	1.11	-1.8	-0.302	-0.169	0.266	1.17	0.26		-0.437	-0.372	0.175	-0.93	0.418	-1.04
0.971	1.31	-0.698	0.203	-0.0247	0.157	0.832	1.06		0.823	0.674	1.8	-1.06	0.175	-1.23
0.509	1.6	-1.19	0.42	0.569	0.129	0.784	1.06		1.18	0.646	0.0183	-1.12	0.539	-1.17
0.936	1.65	0.308	0.561	0.857	0.195	1.26	0.755		-0.101	1.75	1.18	-1.06	0.66	-1.15
0.263	1.28	-0.638	-0.297	0.506	0.00353	1.61	1.46		0.289	0.232	0.528	-0.97	0.122	-0.471
0.171	1.27	0.185	-0.313	0.561	-0.432	1.22	0.895		-0.442	1.37	0.234	-1.08	0.304	-0.516
0.126	1.35	0.135	-0.00504	0.536	-0.556	0.92	1.72		-0.924	0.491	0.701	-0.982	1.04	0.233
0.0407	1.74	-0.119	-0.0572	-0.00231	-0.527	1.09	2.36		-0.0181	-0.561	1.53	-1.06	0.475	0.346
0.11	1.85	0.271	0.807	0.148	-0.613	1.09	1.19		-1.33	-0.661	0.492	-0.975	0.32	1.29
-0.169	1.78	0.232	-0.0657	0.57	-0.39	1.02	1.71		-1.11	-0.776	0.766	-0.947	0.869	1.88
0.00263	1.99	0.549	0.689	0.783	0.129	1.22	1.19		0.164	0.232	1.14	-1.12	1.11	1.46
0.339	1.71	-0.263	0.387	0.97	0.558	1.32	3.08		-0.00233	0.554	-0.411	-0.895	-0.281	1.06
1.33	1.39	1.43	-0.0411	1.11	0.683	1.6	0.745		1.04	0.977	1.26	-0.933	0.611	0.926
0.964	1.12	0.999	-0.149	1.05	0.62	1.19	1.02		1.72	1.09	0.539	-1.05	0.978	1.28
0.698	1.15	0.915	-0.118	0.916	0.386	0.869	2.2		1.2	0.255	0.688	-0.769	1.37	0.582
0.925	0.679	-0.347	-0.578	0.65	0.252	1.07	1.11		-0.595	0.846	1.92	-0.801	1.72	0.266
1.19	0.338	1.1	-0.455	0.38	0.487	0.864	0.416		0.734	0.993	-0.17	-0.769	2.46	0.237
1.28	-0.101	0.134	-0.875	0.426	0.391	0.533	0.765		0.614	0.552	-0.453	-0.916	1.77	0.0328
0.63	-0.12	0.625	-0.565	0.83	0.311	0.792	1.9		-1.11	0.169	-0.706	-0.866	2.36	0.154
0.331	0.188	0.229	0.0635	0.852	1.04	1.08	0.42		-0.657	0.2	0.742	-0.836	0.304	0.194
1.39	0.255	0.935	-0.984	-0.0155	1.48	1.33	-0.458		-0.283	-0.543	0.519	-0.844	1.05	0.313
1.53	0.217	1.28	-0.708	-0.531	1.28	1.18	0.871		-1.07	-0.596	0.34	-0.834	1.82	-0.0103
1.15	0.0353	0.41	-0.837	-0.358	1.37	0.881	0.871		0.824	-0.531	0.705	-1.05	1.41	0.406
1.66	0.185	0.626	-0.321	-0.448	1.58	1.13	0.153		0.601	0.089	0.771	-1	0.9	0.245
1.88	0.28	0.549	0.173	-0.235	1.22	1.35	0.753		1.02	0.667	-0.19	-1.07	1.14	0.252
0.89	0.211	0.692	-0.159	0.127	0.809	1.12	0.732		0.59	1.28	-0.457	-0.959	1.51	0.389
0.6	0.365	0.799	-0.512	0.233	0.921	0.958	0.85		-0.00891	1.43	0.861	-0.914	1.57	0.047
0.842	0.803	1.2	-0.293	0.384	1.31	1.22	-1.14		0.00411	-0.837	-1.19	-0.924	0.24	0.101
0.856	0.524	0.709	-1.63	-0.0147	1.49	1.4	0.123		1.91	-0.947	0.343	-1.14	1.87	0.53
1.31	0.0181	0.388	-0.92	-0.723	1.15	1.62	0.23		1.23	0.317	-0.327	-1.02	1.55	-0.0194
1.23	0.173	1.07	-0.861	-0.608	0.836	2.63	0.0383		-1.07	0.336	-0.61	-0.945	1.66	0.773
0.914	0.0854	0.323	-0.861	-0.101	1.03	3.63	-0.287		-1.2	-1.1	0.499	-1.02	2.03	0.722
1.02	0.576	-0.218	-0.64	-0.18	1.57	3.43	-0.221		0.479	-0.158	0.608	-0.874	0.49	0.674
1.41	0.53	0.431	-0.535	-0.385	1.59	3.26	-0.724		0.297	1.21	-0.698	-0.884	1.06	0.704
1.37	0.691	0.335	0.0333	-0.172	1.16	3.4	0.967		1.91	0.406	-0.872	-0.921	1.1	0.303
1.12	0.504	0.436	-0.429	-0.0309	0.902	3.4	1.64		-0.167	-0.613	0.18	-0.996	1.38	0.741
0.553	0.363	-0.227	0.238	-0.35	0.58	3.32	0.627		-1.23	0.0474	-0.507	-0.775	0.917	1.03
0.748	0.295	-0.0576	0.163	-0.729	0.0162	2.92	2.76		-0.215	0.361	0.0828	-0.865	1.22	1.71
0.781	0.558	-0.0356	-0.318	-0.605	0.104	2.19	0.0506		-0.57	0.0565	-0.239	-0.974	2.56	1.46
0.524	1.1	-0.325	-0.136	-0.423	0.801	2.46	0.517		-0.869	-0.879	0.662	-0.952	1.15	1.23
0.542	1.9	-0.398	0.0403	-0.611	0.81	3.33	3.29		-1.3	-0.556	-0.244	-0.983	2.34	1.35
0.865	2.32	-0.191	0.0136	-0.653	0.316	3.11	0.397		-0.248	-1.24	0.328	-1.03	1.41	1.42
1.34	2.47	-0.346	-0.446	-0.496	0.24	2.06	-0.00232		0.0662	0.0882	-0.0551	-1.03	0.27	0.776
0.608	2.73	0.176	-0.115	-0.423	0.507	1.71	1.61		-0.723	0.182	0.382	-0.876	0.93	0.966
1.24	2.32	0.132	0.416	0.0408	0.75	2.21	1.18		0.0535	-0.146	-0.398	-0.933	0.521	0.95
0.475	2.26	0.263	-0.666	0.175	0.673	2.51	0.738		0.946	0.13	0.524	-0.915	1.58	0.317
0.035	2.07	0.495	-0.58	-0.586	0.54	2.49	-0.0593		-0.235	-0.238	0.159	-0.702	-0.339	0.943
0.598	1.87	0.35	-0.125	-0.652	0.426	2.66	-0.471		1.26	0.128	0.952	-0.934	0.682	0.548
0.385	1.84	-0.18	-0.00364	-0.0219	0.00694	3.22	0.832		-0.806	0.588	0.518	-0.988	0.712	1.7
0.021	1.57	-0.291	0.024	-0.312	0.0628	3.41	1.5		-1.39	-0.608	0.134	-0.811	1.34	1.32
0.208	1.56	0.00934	-0.568	-0.954	0.833	3.39	1.7		0.0775	1.21	-0.698	-1.04	0.707	1.07
0.525	1.77	0.327	-1.15	-0.75	0.918	3.56	0.259		-0.608	-0.641	-0.909	-0.909	0.74	1.24
-0.374	2	0.413	-1.16	0.00476	0.693	3.93	-0.118		0.184	-0.251	-0.0511	-0.934	0.541	1.81
-0.57	1.77	0.184	0.2	0.0118	0.557	4.18	0.87		-0.119	-1.28	0.387	-0.722	2.72	1.78
-0.724	1.53	-0.406	0.559	-0.872	0.695	4.03	0.787		-1.76	0.121	0.121	-0.736	2.6	1.71
-1.06	1.33	-0.498	-0.243	-1.18	0.863	3.48	0.0803		-0.702	-0.442	-0.475	-0.92	1.37	1.04
-1.13	1.13	-0.54	-0.511	-0.653	0.873	3.24	1.24		1	0.879	0.655	-0.825	1.38	1.54
-1.73	1.41	0.00161	-1.35	-0.635	0.862	3.62	0.859		0.34	-0.547	1.76	-0.851	0.784	0.865
-0.831	0.927	0.442	-0.709	-1.19	0.661	3.72	-0.00602		-0.0419	0.0946	0.314	-0.889	1.89	1.23
-0.779	0.905	-0.282	-1.04	-1.46	0.704	3.35	1.2		0.205	-0.6	0.256	-0.866	1.86	1.34
-1.15	1.36	-0.506	-0.147	-1.29	0.952	3.26	-0.149		-0.961	0.204	-0.929	-0.742	0.603	1.34
-1.51	2.1	-0.0827	-0.59	-1.1	0.93	3.63	0.641		1.19	1.49	0.592	-0.66	0.578	0.667
-0.801	2.32	0.155	-0.489	-0.847	0.559	3.49	1.16		0.247	1.68	0.374	-0.689	1.4	0.912
-0.815	2.26	-0.319	-0.56	-0.973	0.531	3.15	1.52		0.686	4.03	-0.646	-0.913	0.397	0.624
0.378	2.07	-0.573	-1.31	-0.86	0.784	2.95	0.303		0.532	2.45	-1.39	-0.877	1.62	0.666
-0.336	2.07	-0.532	-0.6	-0.418	0.846	2.95	-1.21		1.46	3.97	-0.748	-0.926	1.79	0.851
-0.175	2.29	-0.606	-0.974	-0.396	0.486	2.94	0.417		1.2	2.61	-1.44	-1.05	1.21	1.83
-0.417	2.18	-0.157	-0.541	-0.435	-0.0495	3	0.114		1.53	2.2	-0.091	-1.14	0.791	2.12
0.0213	2.19	-0.207	-0.602	-0.414	0.244	3.16	-0.163		1.34	2.99	1.11	-0.979	0.445	2.72
-0.101	2.07	0.394	-0.371	-0.802	0.49	2.77	1.48		0.716	1.75	0.229	-0.921	1.52	3.13
0.418	1.81	0.0695	-1.48	-1.24	0.209	2.43	-0.0068		0.995	1.89	-0.152	-0.838	0.562	3.04
0.299	1.79	0.141	-0.479	-0.818	0.273	2.93	0.798		0.000498	2.36	1.21	-0.669	1.33	2.53
0.0268	1.23	-0.149	-0.32	-0.562	0.298	2.85	0.132		-0.547	0.634	0.731	-0.9	0.795	2.04
0.873	0.934	-0.164	-0.632	-1.08	0.0683	2.44	1.28		0.693	1.62	0.119	-0.986	1.83	2.87
-0.22	1.21	-0.159	0.101	-1.16	-0.302	2.8	0.291		0.302	1.41	1.15	-1.01	1.28	2.63
-0.0106	0.9	-0.56	-0.23	-0.927	-0.468	3.09	0.902		0.511	2.17	-0.152	-1.02	0.272	2.58
-0.189	0.886	-0.0249	-0.418	-1	-0.206	2.97	1.63		0.725	2.47	1.24	-1.04	0.517	1.59
-0.12	0.413	0.309	-0.236	-1.03	0.0285	2.88	1.36		0.671	1.98	1.32	-0.862	0.378	1.77
0.0257	0.263	-0.731	-0.83	-1.11	-0.267	2.76	-0.223		1.98	1.68	-0.05	-0.712	-0.131	1.51
0.323	0.158	1.18	-0.401	-1.21	-0.102	2.82	1.26		1.61	1.95	1.42	-0.905	0.12	1.8
0.0498	0.144	1.33	-0.122	-0.915	0.0016	3.02	0.613		1.08	0.517	1.39	-0.848	0.0349	1.36
0.103	-0.251	0.599	-0.348	-0.835	-0.12	2.8	0.574		0.552	1.24	2.05	-1.04	-0.442	1.26
0.399	0.263	0.0448	-0.264	-1.14	-0.228	2.42	-0.609		0.79	1.96	2.01	-0.822	0.138	1.22
0.0788	0.074	0.285	0.207	-1.44	0.00913	2.72	1.49		1.3	0.375	0.269	-1.01	0.463	1.93
0.0698	-0.0135	0.968	0.371	-1.35	0.244	2.67	0.489		2.1	1.67	0.579	-1.02	0.288	1.45
0.771	-0.115	0.305	1.19	-0.892	0.0299	2.14	0.672		1.49	1.68	2.74	-0.965	-0.132	1.18
0.793	0.021	0.405	1.15	-0.622	-0.0882	2.25	-0.865		1.48	2.33	0.493	-0.891	0.609	1.34
0.663	-0.116	0.188	1.35	-0.871	-0.0236	2.79	1.03		-0.199	2.15	1.61	-1	0.325	2.16
0.525	0.206	-0.0164	0.398	-1.2	-0.106	2.99	1.73		0.804	3.34	0.924	-0.986	0.947	2.18
0.633	0.453	0.064	0.191	-1.15	0.528	2.73	1.96		0.771	1.99	1.46	-1.09	0.809	2.8
0.854	0.0829	0.628	1.21	-1	1.35	2.56	0.296		0.703	2.32	0.213	-1.04	1.18	2.69
0.453	0.535	0.585	-0.564	-1.05	1.52	2.59	1.02		2.01	2.51	1.4	-1.21	1.22	2.78
-0.116	0.0351	1.42	0.0494	-0.97	1.51	2.55	0.71		0.633	1.81	0.246	-1.09	2.67	2.81
-0.0925	-0.277	0.366	0.467	-0.747	1.1	2.68	0.807		0.268	1.65	2.78	-0.977	1.36	2.66
0.798	0.5	-0.152	1.28	-0.353	0.7	2.88	1.27		-0.995	0.907	2.41	-1.1	0.85	2.12
0.845	-0.201	0.504	0.968	-0.653	0.918	3.03	1		0.408	1.69	2.08	-1.15	0.354	2.38
0.783	0.0603	-0.464	0.269	-1.55	0.986	3.21	0.291		0.082	2.61	2.17	-1.09	1.95	2.39
0.341	0.0331	-0.223	0.992	-1.69	0.635	3.35	3.25		1.54	1.17	2.14	-1.18	1.38	1.75
-0.0038	-0.0215	0.446	0.0423	-0.718	-0.083	3.64	1.26		-0.242	2.37	1.72	-1.21	1.45	1.86
0.188	0.0388	0.644	-0.531	-0.0628	0.152	3.94	2.56		0.664	1.35	2.45	-1.04	1.63	1.74
0.146	-0.181	1.34	-0.788	-0.404	0.988	3.67	1.26		0.438	1.86	1.72	-1.12	1.5	1.43
0.386	-0.0449	1.28	0.0271	-0.568	1.03	3.23	0.85		0.707	0.874	2.01	-0.973	1.02	1.75
1.02	-0.395	1.28	0.397	-0.603	0.625	2.83	-0.179		0.35	1.4	2.2	-1	1.28	1.16
0.756	-0.471	0.372	-1.23	-0.942	0.773	2.65	1.53		1.73	2.55	1.41	-1.06	1.01	1.62
-0.00908	-0.366	1.15	-0.458	-0.952	0.748	2.85	0.521		0.95	0.684	0.0844	-1	0.556	1.15
0.103	-0.242	1.45	-0.25	-0.912	0.197	2.98	0.606		0.607	1.37	1.73	-0.895	-0.0862	0.731
0.109	-0.415	1.49	-0.322	-0.622	0.319	2.71	1.06		0.401	2.49	1.63	-0.863	0.893	0.897
0.254	-0.495	1.83	-0.59	-0.484	0.9	2.31	1.06		-0.497	1.71	0.935	-1.05	0.152	1.26
0.562	-0.695	0.883	-0.496	-1.27	0.836	2.52	0.342		-1.01	1.14	0.76	-1.13	0.317	1.11
0.333	-0.643	1.77	-0.963	-1.36	0.551	2.68	0.357		0.892	1.57	0.858	-0.968	-0.7	0.979
0.399	-0.478	0.633	-0.82	-0.467	0.362	2.33	1.58		0.182	0.128	1.11	-0.937	0.84	0.686
0.312	-0.131	1.7	-0.459	-0.331	0.363	2.47	0.573		0.117	1.28	1.54	-1.06	0.0425	0.262
-0.394	-0.11	0.975	-0.224	-0.803	0.23	2.57	1.12		1.47	1.9	0.874	-0.899	-0.412	0.569
-0.679	-0.258	0.811	-0.425	-0.68	-0.029	2.1	-1.38		0.235	2.31	1.75	-1.16	0.676	0.412
-0.279	0.18	0.946	-0.158	-0.53	0.346	1.87	2.04		0.65	2.17	1.3	-1.25	-0.297	0.0232
-0.794	-0.34	0.525	-0.498	-0.443	0.784	2.25	3.19		-0.415	2.09	1.51	-1.14	-0.182	0.55
-0.265	0.0635	1.3	-0.325	-0.627	0.484	2.4	1.22		-0.667	2.98	1.5	-0.938	0.937	0.694
-0.412	-0.355	0.638	-0.631	-0.792	0.094	2.22	-0.04		-0.371	3.04	1.6	-1.08	1.46	-0.207
-0.0724	-0.326	1.08	-0.15	-0.753	0.0973	2.7	-0.582		-0.462	2	0.333	-1.07	0.177	0.0308
-0.972	-0.477	1.49	-0.676	-0.646	0.672	2.97	-0.243		-0.727	1.86	-0.265	-0.97	0.843	-0.344
-0.361	-0.862	0.885	-0.256	-0.61	1.15	2.33	1.99		-0.78	1.02	0.451	-0.992	0.36	-0.201
0.0484	-0.708	1.53	0.133	-0.766	1.35	1.62	-1.06		1.64	1.74	0.143	-1.06	0.693	0.059
-0.596	-0.321	1.24	0.442	-1.27	1.22	1.51	0.58		0.52	1.61	1	-0.912	1.23	0.257
-0.378	-0.173	1.38	0.791	-1.06	0.962	1.62	0.619		-0.033	2.5	1.33	-0.711	1.55	-0.432
-0.587	-0.479	0.824	0.101	-0.527	0.84	1.73	1.95		0.327	3.06	2.46	-0.733	0.315	-0.194
-0.647	-0.589	0.896	-0.0291	-0.603	0.89	2.15	-0.424		0.887	2.95	0.402	-0.674	1.72	0.275
-0.443	-1.02	0.877	-0.393	-0.368	0.994	2.12	-0.504		2.88	1.14	0.151	-0.823	0.993	0.779
-0.506	-0.442	0.63	0.329	-0.459	0.958	1.79	0.773		2.54	2.15	0.437	-0.63	0.567	0.552
-0.735	-0.721	0.746	-0.192	-0.972	0.769	1.94	-1.04		0.723	1.61	1.53	-0.922	0.102	0.247
-0.723	-0.648	0.368	0.631	-0.861	0.884	2.05	0.532		1.47	2.28	1.41	-0.848	0.666	1.15
-0.862	-0.565	2.06	-0.274	-0.519	0.907	1.78	1.38		1.16	1.45	0.0863	-0.902	0.699	0.285
-1.46	-0.342	1.75	-0.0148	-0.625	0.465	2.06	1.08		1.23	0.896	-0.531	-0.803	1.51	0.618
-0.445	-0.803	1.28	0.846	-0.867	0.13	2.44	-0.171		-0.578	2.52	0.849	-0.977	0.77	0.998
-1.03	-0.914	0.551	0.814	-1.23	0.405	2.28	0.488		0.14	2	0.651	-0.851	1.59	0.82
-1.02	-0.438	0.578	1.19	-1.32	1.4	1.93	0.33		1.94	2.11	0.339	-0.876	0.527	0.759
-0.703	-0.223	-0.327	1.04	-0.612	2	2.07	1.82		0.109	1.3	1.49	-1.04	-0.482	0.423
-0.624	-0.436	-0.26	0.509	0.0278	1.49	2.52	0.659		-0.413	2.11	0.182	-1.1	-0.326	0.998
-1.63	0.0205	0.367	0.598	-0.382	1.28	2.67	-0.535		-1.45	0.971	0.00774	-1.03	-0.175	0.843
-0.734	-0.52	0.409	0.31	-0.749	1.6	2.51	0.403		0.778	1.24	1.03	-1.15	-0.314	0.562
-1.08	-0.469	0.407	0.0519	-0.31	1.67	2.69	0.451		0.648	1.16	2.37	-0.879	0.565	0.794
-0.506	-0.722	0.207	0.38	0.239	1.55	2.61	0.536		0.413	2.11	1.37	-1	0.605	0.287
-0.959	-0.554	-0.278	0.5	0.391	1.8	2.49	0.72		1.34	1.42	0.756	-1.03	-0.846	0.0996
-0.658	-0.222	1.78	0.454	0.00344	2.12	2.62	0.218		0.825	1.64	0.66	-1.21	-0.296	0.127
-0.521	-0.387	0.823	0.412	-0.169	2.25	2.57	-0.2		0.0654	1.47	-0.00586	-1.05	-0.00654	-0.315
-1.38	-0.579	0.45	1.19	0.0196	2.02	2.74	0.545		0.924	1.2	-0.381	-1.05	-0.401	0.126
-1	-0.726	0.42	-0.116	-0.485	1.71	3.31	1.71		-1.27	0.547	0.0143	-1.05	-0.0935	0.417
-1.04	-0.253	0.581	0.187	-1.08	1.63	2.73	2.06		-0.447	1.16	1.26	-1.04	-0.113	0.152
-1.13	-0.468	0.214	-1.04	-0.709	1.77	2.21	1.88		-0.0114	0.178	-0.447	-1.07	-0.541	-0.437
-1.11	-0.251	-0.939	0.348	-0.621	1.72	2.72	1.32		0.539	1.33	0.446	-1.19	-1.09	0.0596
-0.555	-0.113	-0.649	-0.677	-0.813	1.5	2.69	1.92		1.08	1.39	-0.916	-1.09	-1.3	-0.0686
-1.13	-0.549	-0.391	-0.283	-0.362	1.65	1.63	1.58		1.72	0.548	-0.157	-0.868	-0.0786	-0.0454
-1.53	-0.694	0.398	-0.259	-0.569	1.66	1.42	0.0583		0.695	2.7	0.441	-1.11	0.405	-0.339
-2.16	-0.775	0.351	-0.258	-1.24	1.21	2.1	2.01		0.195	2.16	1.18	-0.867	0.209	-0.353
-2.53	-0.677	0.325	-0.0394	-1.01	0.928	2.52	0.954		0.0223	1.12	-0.161	-0.699	0.407	0.0343
-2.35	-0.774	0.485	-0.611	-0.933	0.803	2.39	-0.734		0.0933	1.33	-0.811	-0.715	0.961	0.0411
-2.87	-0.944	-0.272	0.184	-0.976	0.714	2.17	-1.01		0.764	1.7	-1.13	-0.883	0.157	-0.49
-2.7	-1.21	-1	-0.533	-0.202	0.845	1.92	1.51		-0.369	1.87	1.19	-0.822	-0.441	-0.478
-2.44	-1.07	-0.891	-1.12	0.103	0.982	1.45	0.748		0.518	0.289	-0.266	-0.943	-0.524	0.0158
-2.57	-0.579	0.657	-1.8	-0.128	1	1.16	1.96		-1.37	0.163	-0.213	-0.951	-0.944	0.26
-2.47	-0.764	1.03	-0.818	0.0763	0.973	1.39	1.86		-0.392	0.953	0.113	-0.924	-0.828	0.0752
-2.41	-0.919	0.757	-1.08	0.123	1.03	1.75	1.22		0.0859	0.821	1.27	-0.748	0.145	0.0282
-2.39	-0.947	-0.191	-1.39	-0.303	1.66	1.69	0.522		0.368	0.992	0.726	-0.864	0.00615	0.0979
-2.47	-1.47	1.39	-1.49	-0.333	1.49	1.25	0.481		-0.274	0.765	0.474	-0.939	0.964	0.757
-3.01	-1.56	0.0149	-0.764	-0.277	0.889	1.07	0.185		0.958	-0.171	-0.402	-0.965	0.0768	0.149
-2.44	-1.31	0.0165	-0.745	-0.15	1.22	1.22	0.236		1.04	0.562	-0.505	-0.947	0.961	0.479
-1.96	-1.08	0.136	-0.698	0.00108	1.41	1.3	1.07		-0.765	1.38	-0.735	-0.804	0.469	0.196
-2.06	-0.996	0.211	-1.31	-0.228	0.881	1.27	0.785		0.0614	-0.249	0.296	-0.664	0.0319	0.885
-1.82	-1.02	0.86	-1.61	-0.593	0.59	1.53	2.1		-0.579	1.87	1.67	-0.694	-0.197	0.213
-1.76	-1.42	0.339	-1.64	-0.44	0.889	1.96	0.302		0.5	3.11	2.07	-0.843	0.241	-0.094
-2.53	-1.37	0.0966	-0.827	-0.29	0.849	1.98	1.39		0.39	1.47	1.71	-1.04	2.3	0.0951
-1.93	-1.22	0.41	-0.163	-0.48	0.673	1.89	0.353		1.42	2.1	0.281	-0.978	-0.694	0.119
-2.85	-1.23	-1	-0.746	-0.606	0.867	2.02	0.0721		1.3	1.82	1.61	-1.16	-0.353	-0.00916
-1.99	-1.56	0.235	-0.892	-0.84	1.06	2.12	0.428		-0.211	0.541	0.264	-1.01	0.22	0.416
-2.37	-1.59	-0.457	-1.38	-1.22	0.935	1.83	0.313		0.423	1.12	1.42	-0.916	1.23	-0.126
-2.35	-0.96	0.456	-2.06	-1.37	0.702	1.63	-1.32		0.188	1.91	0.587	-0.838	-0.654	-0.49
-1.77	-1.03	-0.0866	-2.14	-0.865	0.914	1.74	-0.576		1.99	1.93	0.781	-0.797	0.0774	-0.455
-1.87	-1.02	0.27	-1.49	-0.553	1.36	1.86	-0.444		0.631	1.97	0.104	-0.847	0.875	-0.803
-1.92	-1.5	0.748	-2.54	-1.18	1.09	1.61	0.274		0.459	1.92	0.602	-0.802	-0.00165	-0.802
-1.53	-1.32	-0.11	-1.68	-1.1	0.664	1.44	0.144		0.616	1.51	1.54	-0.919	0.185	-0.0771
-1.48	-1.27	0.741	-2.09	-0.457	0.857	1.99	-0.175		-0.239	1.57	2.65	-0.687	0.437	-0.114
-1.48	-1.29	1.19	-2.34	-0.852	1.14	2.13	-0.366		1.46	2.58	3.97	-0.617	0.961	-0.0804
-1.67	-1.53	1.03	-1.45	-1.56	0.888	1.79	0.956		0.992	0.236	3.66	-0.749	0.353	0.359
-1.29	-1.6	1.53	-2.75	-1.57	0.553	1.71	-0.94		-1.02	0.0728	2.77	-0.85	0.642	-0.304
-1.58	-1.4	1.29	-1.18	-1.03	0.639	1.38	-0.351		-0.633	1.6	3.97	-0.858	0.438	-0.106
-1.19	-1.31	1.12	-1.57	-0.734	0.993	0.763	-0.339		0.11	1.3	3.4	-0.796	0.621	0.0159
-1.2	-1.55	1.44	-1.14	-1.33	0.958	0.819	0.0239		1.02	1.42	3.63	-0.735	1.15	0.187
-1.42	-1.36	1.23	-0.843	-1.87	0.873	1.32	0.0502		0.999	0.739	1.91	-0.79	-0.212	-0.0964
-1.73	-1.51	1.26	-0.747	-1.38	0.729	1.69	0.557		0.396	0.376	2.59	-0.746	0.0584	-0.431
-2.04	-1.42	1.67	-0.757	-0.668	0.671	1.72	0.831		-1.49	0.409	1.87	-0.845	0.239	-0.39
-1.28	-1.44	1.31	-1.02	-0.471	0.741	1.26	1.49		0.112	0.354	2.72	-0.93	0.368	-0.0349
-1.21	-1.02	1.12	-0.4	-0.438	0.836	0.865	0.511		-0.284	0.835	2.99	-1.09	-0.341	-0.0183
-1.33	-0.299	1.27	-0.945	-0.654	0.763	1.11	0.196		-0.263	-0.18	3.06	-0.87	0.0179	0.481
-1.46	-0.41	0.802	-1.49	-0.478	0.611	1.33	-0.63		1.07	1.76	3.54	-0.888	0.835	0.0979
-0.653	-0.605	1.13	-1.61	-0.12	0.921	1.45	-1.41		1.26	0.591	4.67	-0.887	0.77	0.266
-0.919	-0.542	0.72	-1.03	-0.232	1.05	1.5	0.19		1.79	1.06	4.6	-0.709	0.933	0.296
-1.05	-0.715	0.734	-0.906	-0.188	0.994	1.47	1.01		1.38	0.974	2.44	-0.633	1.22	0.244
-1.1	-0.788	-0.0637	-0.763	-0.814	1.07	1.22	0.514		1.18	-0.18	3.51	-0.904	0.934	0.442
-0.814	-0.854	0.0477	-0.974	-1.04	1.01	0.866	2.67		0.334	0.355	4.04	-0.98	1.12	0.0426
-0.592	-0.558	0.14	-1.58	-0.49	0.683	0.925	-0.667		0.727	0.207	3.53	-1.04	1.36	-0.0509
-1.07	-1.03	-0.00603	-1.16	-0.391	0.786	1.29	1.31		1.21	0.956	3.53	-1.13	0.315	-0.0769
-1.17	-1.05	0.397	-1.58	-0.72	0.989	1.47	-0.357		1.47	1.07	2.32	-1.11	-0.167	-0.0565
-0.532	-0.922	-0.333	-1.45	-0.601	0.939	1.03	-0.737		1.93	1.26	2.21	-1.05	-0.766	-0.21
-1.05	-1.09	0.333	-0.622	-0.526	0.876	0.846	-0.292		1.04	1.66	3.05	-0.944	1.01	0.359
-0.834	-1.25	-0.5	-0.119	-0.751	0.639	1.3	0.108		-0.301	1.17	2.09	-0.942	-0.0246	1.65
-0.214	-1.45	0.0202	-0.914	-0.728	0.476	1.59	0.754		-0.222	2.72	1.43	-1.04	1.6	1.73
-0.513	-1.34	1.87	-1.03	-0.243	0.658	1.47	-1.54		0.367	1.52	1.96	-1.09	1.13	1.98
-1.11	-0.93	1.12	-0.368	-0.167	0.635	1.24	1.29		-0.643	1.64	2.37	-1.16	0.778	1.26
-0.574	-1.25	1.09	-0.96	-0.422	0.571	1.06	0.175		1.77	0.518	0.518	-0.97	1.26	1.03
-0.345	-1.14	0.369	-1.52	0.242	0.377	1.41	0.796		1.91	1.19	1.93	-1	0.684	0.714
-0.598	-1.09	0.7	-0.965	0.651	0.256	1.19	-0.217		0.342	1.14	1.92	-1.28	1.2	1.14
-0.819	-0.811	0.555	0.507	-0.383	0.53	0.822	0.134		-0.0261	1.11	1.11	-1.33	0.826	1.25
-0.663	-0.77	-0.069	-0.992	-1.1	0.549	1.58	1.85		-0.0395	0.16	1.78	-1.06	1.81	0.759
-0.609	-0.955	0.468	-0.529	-0.021	0.435	1.5	0.207		-0.563	1.65	2.47	-1.21	0.409	1.01
-0.0413	-1.04	1.45	-1.86	0.561	0.859	0.584	-0.265		-0.136	0.63	2.07	-1.07	1.42	1.04
-0.498	-1.26	0.169	-1.94	-0.103	1.34	0.433	-0.78		0.453	0.742	2.92	-1.07	1.38	0.863
-0.625	-1.13	-0.186	-1.47	-0.339	1.2	1.22	0.39		0.000352	2.86	3.44	-1.27	1.45	0.388
-0.729	-1.44	-0.45	-1.32	-0.374	0.822	1.46	-1.89		-0.582	1.13	3.25	-1.13	0.938	-0.315
-0.613	-1.43	-0.183	-0.986	-0.625	1.22	0.882	0.414		0.0597	1.96	2.25	-1.06	1.38	0.623
-0.317	-1.36	0.0251	0.245	-0.522	1.61	0.832	1.72		0.745	1.18	2.89	-1.05	-0.0356	0.517
-0.0245	-1.28	1.15	-0.217	-0.466	1.3	0.987	1.22		0.175	1.04	3.09	-1.04	0.537	1
-0.0691	-1.39	1.34	-0.518	-0.586	0.592	1.27	2.13		-0.543	1.36	2.24	-0.915	-0.0846	1.69
0.454	-1.17	0.946	-0.778	-0.609	0.42	1.27	2.02		0.14	0.331	1.04	-1.02	0.0726	1.17
-0.206	-1.22	0.8	-1.32	-1.45	0.808	0.716	0.53		0.768	0.632	1.31	-1.12	0.0539	1.02
0.00347	-1.68	0.0371	-1.48	-1.48	0.858	0.523	1.22		0.614	-0.29	1.99	-1.02	0.68	1.13
-0.0663	-1.42	0.5	-1.55	-0.537	0.477	1.12	1.53		1.6	0.117	1.91	-1.15	1.49	0.806
0.278	-1.07	1.14	-0.649	0.0277	0.946	1.31	1.2		0.669	1.49	0.994	-1.28	0.987	0.765
0.272	-1.31	0.428	-1.67	-0.0563	1.24	1.03	-0.345		0.287	0.421	1.6	-1.26	1.71	0.446
0.492	-1.06	-0.155	-0.763	-0.388	0.684	0.639	0.57		-0.167	0.0733	2.03	-1.26	1.75	0.522
0.127	-1.3	0.779	-1.2	-0.134	0.14	0.698	0.44		-0.115	0.382	1.22	-1.24	0.758	-0.164
0.0942	-1.54	0.417	-0.891	-0.0893	0.246	1.07	0.712		0.528	0.435	-0.164	-1.21	0.24	-0.231
0.583	-0.915	1.01	-0.235	-0.586	0.698	1.27	0.318		1.29	0.718	1.71	-0.944	0.827	-0.265
0.284	-0.721	0.321	-0.645	-0.36	1.11	1.13	1.1		-0.165	-0.0985	1.1	-1.09	0.815	0.0658
0.664	-0.694	0.901	-0.991	0.455	0.694	1.33	1.81		-0.446	0.678	0.401	-1.22	0.251	0.377
-0.359	-0.833	1.41	-1.2	0.0346	0.319	1.61	-0.452		0.421	1.2	0.181	-1.43	0.89	0.379
-0.298	-0.719	1.36	-0.478	-1.06	0.497	1.56	-0.475		0.256	0.871	0.256	-1.19	1.37	0.807
-0.115	-0.72	1.15	-1.17	-0.936	0.932	1.45	1.73		0.248	0.0619	0.139	-1.02	1.73	0.71
0.24	-0.215	1	-0.556	-0.153	0.621	1.83	2.03		-0.35	0.652	1.19	-1.12	0.0362	1.03
-0.35	0.584	1.06	-0.186	-0.106	-0.0514	1.64	2.04		-1.02	-0.0897	0.362	-1.11	-0.386	-0.0735
-0.13	0.545	0.726	-0.313	-0.562	-0.0248	1.23	0.115		-0.84	0.369	-1.25	-1.1	1.19	0.495
0.0222	0.532	0.22	-0.716	-0.479	0.566	1.47	-0.23		-0.573	0.428	0.385	-1.19	0.612	0.386
0.321	0.166	1.92	0.0587	0.0241	0.892	1.86	0.256		-1.65	0.74	0.394	-1.08	0.533	0.585
0.839	0.0942	1.77	-0.716	-0.214	0.349	1.65	-0.362		-1.88	0.519	1.7	-0.949	1.14	0.483
1.01	0.194	2.17	-1	-1.1	-0.0459	1.19	0.718		0.0728	1.49	2.02	-1.15	1.57	0.479
1.07	-0.0448	2.8	-1.32	-1.21	0.219	1.55	0.545		-1.56	0.315	2.28	-0.967	0.11	0.423
0.927	-0.243	1.98	-0.15	-0.567	0.67	1.97	-0.3		0.352	-0.467	1.93	-1.07	0.939	0.0665
1.12	0.1	1.43	-0.66	-0.0855	0.789	1.56	0.149		0.0141	0.336	0.177	-1.09	-0.0356	0.583
0.955	-0.13	0.135	-0.612	-0.143	0.608	0.999	-0.0544		0.881	1.23	0.523	-0.947	1.16	1.02
0.866	-0.344	1.24	0.96	-0.494	0.42	0.942	0.113		0.462	-0.205	1.03	-0.928	0.493	0.732
0.669	-0.827	0.524	-0.815	-1.14	0.596	1.31	1.34		-1.49	0.0804	-0.72	-0.865	0.295	0.261
0.901	-0.523	0.393	0.41	-1.38	0.863	1.36	0.826		-1.32	0.597	1.57	-0.775	0.247	0.306
0.926	-0.497	-0.0998	-0.387	-1.05	0.705	1.17	2.71		0.228	1.26	-0.39	-0.698	1.93	0.161
1.26	-0.652	1.3	-0.203	-0.686	0.53	0.791	-0.306		1.38	0.167	0.416	-0.536	1.48	0.266
1.22	-0.723	0.306	-0.917	-0.463	0.478	0.899	-2.05		0.654	-0.575	1.68	-0.812	0.318	0.311
1.35	-0.563	0.379	-1.23	-0.51	0.449	1.03	-0.262		0.98	0.0646	1.86	-0.736	1.96	0.223
1.35	-0.518	0.949	-1.81	-0.709	0.349	0.804	-0.137		-0.014	0.665	0.831	-0.872	0.58	0.0983
0.989	-0.545	0.684	-1.36	-0.829	0.327	0.789	2		0.852	-0.0535	1.16	-0.874	-0.113	0.264
0.628	-0.701	0.942	-1.21	-0.911	0.317	0.846	0.93		2.18	0.73	1.29	-0.852	1.12	0.158
0.995	-0.71	1.07	-1.1	-1	0.555	0.752	-0.602		1.02	0.686	1.13	-1.05	-0.538	-0.129
1.8	-1.25	1.62	-0.357	-0.844	0.504	0.537	-0.959		1.01	-0.0282	1.34	-1.1	0.599	-0.0926
1.5	-0.68	1.78	-0.685	-0.696	0.00579	0.51	-0.617		1.16	0.383	1.41	-0.917	2.08	-0.409
1.59	-0.751	1.19	-0.733	-0.726	-0.153	1.1	1.3		-0.175	-0.717	1.01	-1.05	1.05	-0.543
2	-0.623	0.669	-1.28	-0.363	0.137	1.4	0.644		2.19	-1.33	0.882	-1.14	1.05	-0.58
1.19	-0.794	0.889	-0.755	-0.212	0.4	1.03	0.789		-0.366	-0.0143	1.65	-1.33	1.28	-0.55
0.654	-1.03	0.817	-1.44	-0.557	0.772	0.673	-1.29		0.124	-0.171	1.66	-1.26	0.592	-0.95
1.65	-0.943	1.14	-0.766	-0.723	0.568	0.964	-0.219		1.47	-0.328	0.484	-1.35	0.6	-0.642
0.831	-0.891	1.75	-1.33	-0.476	0.151	0.479	-0.0141		0.609	0.457	0.171	-1.24	0.7	-0.729
1.42	-1.2	0.826	-0.929	-0.547	0.572	0.255	-1.2		1.14	0.0584	0.317	-1.22	2.7	-1.3
1.08	-1.26	1.45	-1.86	-1.14	1.05	0.862	0.129		0.314	0.653	0.958	-1.14	0.985	-0.678
1.15	-1.42	0.895	-1.94	-1.36	0.853	1.05	-0.653		-0.562	-0.802	1.02	-1.13	0.478	-0.864
1.55	-1.91	0.614	-1.54	-0.922	0.764	0.756	1.74		-0.545	-0.415	0.952	-1.03	0.669	-0.942
2.5	-1.46	0.817	-1.51	-0.244	1.31	0.788	0.154		-0.484	-0.436	1.78	-1.11	0.0474	-0.864
1.65	-1.36	0.858	-2.63	-0.354	1.38	1.12	1.86		-0.509	0.167	1.47	-1.09	1.29	-0.957
1.42	-1.18	1.22	-1.79	-0.776	0.923	0.993	1.02		0.801	-1.15	2.43	-1.18	1.5	-0.793
1.82	-1.42	1.08	-1.61	-0.681	0.572	0.867	0.0413		-0.202	0.0298	0.497	-1.1	1.79	-0.912
1.67	-1.45	1.43	-1.9	-0.358	0.916	1.26	1.08		1.06	0.995	0.47	-1.13	1.4	-0.555
1.67	-1.31	0.539	-1.78	-0.265	1.04	1	0.962		1.32	-0.961	0.685	-1.04	1.82	-1.06
1.46	-1.52	0.927	-1.42	-0.673	0.615	0.707	1.94		0.816	0.892	1.54	-1.08	1.35	-1.07
1.11	-1.33	1.64	-1.95	-1.16	0.73	1.06	1.17		0.636	0.78	0.941	-1.16	1.63	-1.25
1.47	-1.28	1.02	-1.55	-1.12	0.821	1.42	2.13		0.982	1.01	1.84	-1.01	1.55	-0.789
1.9	-0.818	0.656	-2.02	-0.897	0.771	1.13	1.09		0.222	0.53	1.68	-0.958	2.33	-1.43
1.53	-1.1	1.05	-2.09	-1.2	0.985	1.12	1.37		0.145	-0.0311	0.54	-0.772	1.21	-1.42
1.19	-1.42	1.27	-1.23	-1.12	1.01	0.985	0.65		0.438	-0.369	1.1	-1.03	1.5	-1.61
1.68	-1.2	0.528	-2.44	-0.66	1.18	0.766	0.639		0.591	1.68	0.977	-0.791	0.544	-1.56
2.08	-1.44	1.86	-1.91	-0.834	1.33	0.809	0.333		0.245	0.263	0.922	-0.764	1.27	-1.52
2	-1.26	1.41	-1.87	-0.955	1.17	0.817	-0.732		-0.131	0.876	0.65	-1.02	2.31	-0.992
1.27	-1.74	1.33	-0.988	-0.647	1.41	0.923	-0.381		-0.464	-0.000451	1.72	-0.823	0.912	-1.62
1.39	-1.88	1.37	-1.12	-1.39	1.94	1.2	-0.0655		-0.526	-0.569	1.09	-0.697	0.261	-1.2
1.29	-1.83	1.01	-0.954	-1.99	1.72	0.759	1.15		-0.0382	0.621	1.79	-0.845	1.14	-1.43
1.38	-1.69	1.23	-0.646	-1.67	1.2	0.423	0.367		-1.5	-0.678	0.953	-0.841	2.29	-1.5
1.14	-1.56	1.56	0.323	-1.31	1.32	0.541	-1.9		0.215	0.353	0.449	-0.778	1.85	-1.36
1.32	-1.6	1.33	-1.08	-0.867	1.55	0.787	-0.648		2.46	0.993	0.859	-0.733	0.879	-1.44
1.06	-1.87	0.774	0.37	-0.418	0.99	0.985	1.07		1.57	0.914	0.251	-0.868	0.53	-1.26
1.25	-1.58	1.32	-0.0276	-0.379	0.397	1.37	-2.24		0.315	1.34	2.18	-0.739	1.66	-1.23
0.572	-1.32	-0.0193	-0.317	-0.949	0.374	1.79	-0.611		-0.804	0.669	1.96	-1.08	0.595	-1.17
1.33	-1.45	1.11	-0.313	-1.38	0.903	1.92	0.29		0.364	0.902	-0.117	-0.783	-0.34	-1.17
1.21	-1.06	0.76	0.497	-1.11	1.43	1.93	0.999		1.18	-0.441	0.605	-0.798	-0.404	-1.34
1.26	-0.989	1.78	0.352	-0.839	1.56	2.3	0.326		-0.0603	-0.19	0.788	-0.804	0.687	-1.07
1.62	-0.983	1.2	1.19	-1.14	1.12	2.2	0.811		-0.424	-0.299	0.754	-0.793	0.428	-0.966
0.3	-1.3	1.91	-0.338	-1.41	0.678	1.82	-0.257		-0.176	-0.389	1.32	-0.921	-0.173	-1.33
0.945	-0.786	0.867	0.871	-1.37	0.305	1.99	0.0332		0.151	-0.408	1.04	-0.901	0.0911	-1.37
1.1	-0.738	1.26	0.842	-1.2	0.302	2.11	-0.715		-0.943	-0.561	0.332	-0.732	-0.95	-1.63
1.13	-0.849	0.506	-0.0335	-0.957	0.594	1.8	-0.101		0.688	-1.24	0.347	-0.748	-0.983	-1.03
1.02	-0.971	0.723	-0.329	-0.975	0.791	1.68	-0.978		0.314	-0.511	0.55	-0.831	0.59	-1.2
0.755	-0.779	1.12	-0.197	-1.03	0.761	1.76	0.406		0.788	0.197	0.338	-0.767	0.848	-1.14
0.469	-0.91	1.56	0.353	-0.73	0.437	1.39	0.954		-0.12	1.15	0.381	-0.828	-0.0284	-1.16
0.78	-0.845	0.278	-0.0354	-0.45	0.428	1.13	-0.0804		-1.36	0.388	1.03	-0.975	0.539	-0.659
0.957	-0.869	-0.0338	-0.841	-0.261	0.627	1.55	0.937		0.34	1.08	0.81	-0.923	-0.773	-0.87
0.674	-1.03	-0.344	-0.508	-0.841	0.544	2.13	-0.315		-0.648	0.545	1.05	-1.02	0.0288	-0.548
0.459	-0.948	-0.631	-0.218	-1.14	0.476	2.46	0.385		0.0265	0.601	1.11	-0.97	-0.29	-1.12
0.268	-1.31	0.176	-0.513	-0.35	0.301	2.26	0.808		1.1	0.616	-0.346	-0.939	-0.538	-0.77
1.19	-0.867	0.0912	-0.903	-0.0712	0.421	1.98	0.787		0.745	0.432	0.803	-0.966	1.8	-0.503
1.15	-1.01	0.615	-0.758	-0.619	0.962	2.2	1.82		-0.447	-0.44	0.632	-1.15	-0.173	-0.133
0.773	-0.705	0.854	0.277	-0.7	1.25	2.86	0.895		-0.331	0.195	1.04	-1.18	1.09	-0.291
0.568	-0.536	0.416	0.119	-0.621	1.32	3.17	-0.031		-0.247	0.415	0.82	-1.01	0.247	-0.0682
1.32	-0.444	-0.236	-0.136	-1.12	1.4	2.63	0.622		0.0779	-0.0284	0.892	-0.836	1.23	-0.23
0.748	0.241	-0.251	-0.405	-0.848	1.33	2.26	-0.391		0.331	1.37	0.646	-0.876	0.315	-0.216
0.766	-0.0997	-0.735	-0.392	0.00369	1.45	2.48	2.2		1.18	0.851	1.21	-0.957	-0.281	-0.593
0.91	-0.072	0.302	-0.228	0.17	1.75	2.19	0.841		-1.84	0.731	2.02	-0.982	1.99	-1.46
0.558	-0.255	1.16	-0.0271	-0.594	1.51	1.67	0.898		0.522	1.25	0.657	-0.982	0.478	-0.954
0.251	-0.292	0.729	-0.738	-0.774	1.23	2.01	0.395		1.42	-0.337	0.309	-1.18	-0.134	-0.991
0.384	-0.715	0.84	-1.05	-0.585	1.15	2.38	0.365		1.96	1.9	1.91	-0.882	1.22	-0.221
0.398	-0.726	0.631	-1.84	-0.854	1.52	1.51	0.952		1.32	0.311	2.06	-1.13	0.139	-0.148
1.36	-1.27	0.691	-1.67	-0.903	1.76	0.79	0.349		2.1	1.49	1.37	-1.16	-0.322	-1.02
0.978	-1.03	-0.511	-0.81	-0.556	1.15	0.762	-1.11		0.86	1.42	0.744	-1.22	-0.773	-0.987
1.3	-1.04	-0.507	-0.634	-0.65	0.812	0.608	1.46		3.02	0.343	0.877	-0.763	-0.165	-0.52
1.23	-0.982	-0.269	-0.0829	-0.989	0.863	0.601	0.44		1.6	0.853	2.43	-1.09	-0.381	-1.1
0.636	-1.48	-0.179	-1.56	-0.293	0.609	1.07	-0.376		1.99	0.318	2.3	-1.24	-0.404	-1.17
0.356	-1.29	-0.641	0.15	0.273	0.519	1.12	-1.38		0.783	0.391	3.08	-1.12	-0.741	-1.06
1.12	-1.35	0.214	-1.4	-0.568	0.862	0.915	-0.625		0.17	0.0706	2.25	-1.39	0.984	-0.502
0.784	-1.32	-0.291	-0.763	-0.929	0.458	0.701	0.51		0.373	-0.638	2.42	-1.24	0.447	-0.75
0.321	-1.19	-0.204	-1.04	-0.289	-0.0364	0.739	-0.02		1.7	-0.0828	1.27	-1.07	0.589	-0.588
0.105	-1.32	-0.511	-0.859	-0.276	0.142	0.881	1.04		0.483	-0.271	0.654	-1.05	0.491	-0.758
0.815	-1.55	-0.727	-0.989	-0.612	0.272	1.21	3.36		0.446	-0.871	0.558	-0.728	0.372	-1.21
0.31	-1.18	-0.752	-1.44	-0.602	0.326	1.49	0.601		1.06	-0.00556	0.851	-0.988	2.2	-1.58
0.844	-1.01	-0.236	-0.913	-0.331	0.657	1.59	-0.0901		0.733	-1.03	1.42	-1.06	1.57	-0.986
0.789	-1.27	-0.633	-1.44	-0.151	1.06	1.35	-0.183		1.26	0.284	1.05	-1.24	0.654	-0.847
0.866	-1.01	-0.951	-1.8	-0.286	1.06	1.28	0.529		0.198	0.174	1.42	-1.2	1.25	0.183
1.04	-0.792	-0.895	-0.311	-0.306	0.795	1.3	1.48		0.306	-0.466	-0.279	-1.15	1.99	0.0493
0.935	-0.355	-0.761	0.205	-0.389	0.784	1.26	2.29		1.01	0.183	-0.631	-1.04	2.42	0.203
0.553	-0.203	-1.04	0.0514	-0.611	1.24	1.5	0.0501		1.68	0.368	0.626	-0.925	2.65	0.234
1.4	-0.365	0.529	-0.72	-0.886	1.43	1.43	2.64		0.556	0.585	0.616	-0.842	1.25	0.33
1.56	-0.638	-0.51	-0.498	-1.03	1.12	1.26	0.494		-1.32	0.0325	0.34	-0.867	1.69	-0.216
0.839	-0.595	-0.0505	-0.682	-1.3	1.07	1.26	-0.551		-0.955	0.212	0.655	-0.867	1.12	0.271
0.279	-0.46	-0.756	-0.39	-1.15	1.03	1.39	-0.814		-0.0518	-1.48	1.33	-0.936	1.53	-0.655
1.14	0.0522	-0.424	-1.47	-0.429	1.08	1.62	-0.147		-0.584	-0.0166	1.85	-0.897	0.75	-0.468
0.612	0.291	-0.715	-1.04	-0.0698	1.4	1.85	1.51		0.262	-0.81	0.97	-0.933	2.03	-0.131
0.672	0.481	0.555	-0.182	-0.244	1.53	1.49	0.171		0.0786	-0.445	0.766	-0.807	1.89	-0.0929
1.42	0.496	0.557	0.536	-0.227	1.2	1.11	2.13		0.116	-0.0875	0.126	-0.814	1.83	-0.214
1.29	0.0451	0.554	-0.241	-0.221	0.718	1.24	-1.01		-0.00428	0.393	1.27	-0.895	1.61	-1.06
0.559	-0.298	0.0277	-1.16	-0.26	0.876	1.43	2.19		0.716	-0.505	0.986	-1.05	0.973	-0.58
0.511	0.234	0.106	-0.943	0.245	1.39	1.02	2.16		0.415	-0.234	1.38	-0.954	1.02	-0.711
0.656	0.419	-0.23	-0.968	-0.476	1.44	1.4	0.168		-1.34	-0.121	-0.0217	-0.947	1.23	-0.869
0.492	0.365	0.474	-0.45	-1.25	1.26	1.82	-0.0587		-0.0628	-0.0866	0.75	-1.02	1.02	-0.742
0.855	0.242	-0.123	-0.252	-0.496	1.12	1.37	-0.642		0.814	-0.111	0.834	-0.895	0.799	-1.26
0.958	0.161	0.53	-1.03	-0.278	0.695	1.07	-0.454		0.327	0.258	0.157	-1.18	0.987	-0.671
0.733	-0.224	0.15	-0.278	-0.764	0.461	1.15	0.148		0.748	-0.552	-1.4	-1.15	0.925	-0.301
1.32	-0.165	0.574	-0.142	-1.01	0.789	1.31	0.553		-0.218	1.42	-1.73	-1.05	1.71	-0.877
0.576	-0.348	0.62	-0.591	-0.881	0.877	1.3	1.49		0.0369	0.836	-0.64	-1.05	1.06	-0.872
0.691	-0.319	0.822	-0.745	-0.485	0.962	1.11	1.16		0.479	0.849	-0.662	-0.979	1.59	-0.897
0.773	-0.594	0.568	-1.56	-0.188	1.11	0.843	0.438		-0.44	0.938	-0.553	-0.928	0.404	-0.576
0.73	-0.151	0.987	-0.678	-0.378	1.15	0.999	-0.282		0.333	0.367	0.224	-1.23	1.16	-0.792
1.17	-0.3	1.89	-1	-0.832	0.875	1.4	0.508		0.186	0.792	-0.839	-1.24	2.14	-0.636
0.964	-0.0343	1.54	-0.463	-0.774	0.519	1.3	0.988		-0.341	0.798	0.0619	-1.02	1.73	-1.06
0.817	-0.592	0.635	-0.705	-0.549	0.653	1.04	0.125		0.0599	0.861	-0.392	-0.998	2.85	-0.627
0.712	-0.475	0.443	-0.774	-0.913	0.892	1.3	-0.368		-1.6	-0.00577	-1.57	-0.927	2.7	-0.166
0.211	-0.232	0.304	-0.952	-1.25	1.18	1.51	0.562		-0.222	1.21	-1.29	-0.923	2.13	-0.19
0.955	-0.288	0.254	-0.882	-0.632	1.43	1.37	-0.303		0.188	1.28	-1.12	-0.916	1.84	-0.261
0.415	-0.304	0.954	-0.862	-0.0822	1.34	1.12	0.32		-0.234	1.52	-1.11	-0.892	2.07	-0.139
0.292	-0.599	0.182	-0.125	-0.126	1.21	0.673	1.26		-0.694	1.37	0.029	-1.03	0.938	0.0192
1.43	-0.68	0.447	-0.516	0.136	1.03	0.634	1.06		-1.27	-0.525	0.326	-0.801	1.75	0.0109
0.788	-0.133	1.16	-0.369	-0.142	1.15	1.26	1.4		-0.83	-0.687	0.696	-1.02	2.08	-0.847
0.717	-0.482	0.177	-0.448	-0.859	1	1.02	0.773		-1.22	0.276	1.03	-1.01	1.61	-0.642
0.624	-0.104	0.852	-0.305	-0.559	0.742	0.273	1.17		-0.287	0.434	0.619	-1.05	0.936	-0.0767
0.0314	-0.453	0.759	0.141	0.1	0.924	0.37	0.638		-0.69	0.332	-0.0507	-0.986	1.54	-0.455
0.414	-0.541	-0.0745	0.496	0.141	0.927	0.838	-0.481		0.183	0.818	-1.28	-1.16	1.52	-0.353
0.252	-0.614	0.729	-0.397	-0.341	0.892	1.21	0.22		0.32	0.278	0.141	-0.986	1.48	-0.336
0.71	-0.709	0.647	-1.74	-0.512	0.955	1.18	0.645		0.124	0.287	0.591	-1.25	1.81	0.229
0.0226	-0.566	0.127	-1.97	-0.55	0.43	1.36	0.229		0.164	0.128	0.922	-1.22	2.66	-0.047
0.267	-0.416	1.11	-1.89	-0.998	0.286	1.69	-0.209		0.065	1.73	0.438	-1.23	1.82	-0.219
0.568	-0.255	0.296	-0.685	-1.18	0.458	1.98	0.939		0.227	2.05	0.288	-1.19	2.65	0.00779
0.916	-0.401	0.632	-1.01	-0.485	0.217	1.92	0.915		0.536	0.406	0.329	-1.22	4.13	0.139
0.569	-0.41	0.685	-0.925	-0.298	0.153	1.78	1.09		0.0991	0.994	-0.0377	-1.06	3.08	-0.598
0.252	-0.189	0.124	-0.441	-1.01	0.412	1.6	0.0514		-0.114	1.25	1.16	-1.17	2.02	-0.463
0.345	0.167	0.754	-0.581	-0.98	0.562	1.89	1.25		-0.136	0.12	0.735	-1.25	2.05	-0.376
-0.0711	-0.0232	1.25	-0.8	-0.43	0.214	2.38	0.0441		-0.628	-0.274	0.783	-1.25	3.14	-0.451
-0.332	-0.177	1.62	-0.757	-0.165	0.278	1.76	1.68		0.581	-0.828	0.887	-1.34	3.9	-0.834
-0.831	-0.396	0.641	-0.275	-0.38	0.404	0.997	0.339		0.484	0.682	0.414	-1.34	3.4	-0.948
-0.879	-0.537	0.879	-1.37	-1.19	0.388	1.43	-0.207		0.701	-0.482	1.43	-1.21	0.622	-1.03
-0.619	-0.681	0.525	-0.663	-1.45	0.411	2.04	-0.784		0.249	0.284	0.452	-1.13	1.37	-0.972
-0.373	-0.527	0.448	-0.00453	-0.808	-0.0417	1.69	0.0808		0.114	-0.203	0.576	-0.994	1.5	-0.929
-0.799	-0.914	0.505	-1.13	-0.0384	0.208	1.26	0.00385		1.54	-0.518	0.817	-0.796	1.04	-0.869
-0.0498	-0.972	0.575	-0.934	-0.00553	1.32	1.3	1.38		-0.00951	-0.615	0.508	-0.639	2.71	-0.545
-0.527	-0.609	0.175	-0.751	-0.149	1.39	1.83	1.44		-0.637	-0.818	0.514	-0.802	1.64	-0.423
-1.07	-0.782	-0.95	0.0441	-0.429	0.874	1.91	-0.643		-0.0613	0.767	-0.375	-0.811	2.31	-1.32
-0.374	-0.23	-0.628	0.489	-0.881	1.02	1.15	-0.211		-0.947	0.0595	-0.279	-0.577	2	-0.729
-0.0395	-0.325	-0.501	0.035	-0.715	1.93	0.889	0.0239		0.191	-0.281	0.484	-0.531	1.7	-1.37
-0.871	0.0199	0.0864	-0.94	-0.65	2.49	1.33	1.45		0.0634	0.765	-0.766	-0.583	1.19	-1.01
-0.719	-0.508	0.398	-0.72	-1.07	2.26	1.37	-0.0457		-0.274	-0.614	0.572	-0.727	3.75	-1.47
-0.549	-0.484	0.466	-1.08	-1.04	2.23	0.923	0.657		1.2	-0.601	0.149	-0.618	2.06	-1.3
-0.554	-0.606	-0.781	-1.23	-0.806	1.77	1.08	0.576		-1.12	-0.276	1.95	-0.555	1.73	-1.22
-0.574	-0.813	-0.521	0.0679	-1.51	1.05	1.76	0.434		1.24	0.963	1.98	-0.551	0.552	-1.1
-1.15	-0.614	-0.433	0.0249	-1.89	1.35	1.94	0.271		1.08	0.564	0.961	-0.439	1.58	-1.62
-0.35	-0.881	-0.237	-0.443	-1.12	2.09	1.34	0.478		-0.309	0.758	1.93	-0.503	1.24	-1.34
-0.756	-0.575	-0.325	-0.401	-0.756	1.97	1.06	0.124		-0.548	-0.609	0.522	-0.608	0.9	-1.36
-0.802	-0.495	0.218	-0.342	-0.887	1.64	1.11	-0.117		0.132	0.0611	1.28	-0.542	1.98	-0.511
-0.112	-0.348	0.113	-0.758	-1.12	1.32	1.14	0.658		-0.622	-0.291	1.24	-0.701	2.12	-0.742
-0.746	-0.212	-0.114	0.12	-1	0.939	1.31	0.0621		-1.22	-0.913	1.21	-0.795	2.02	-0.759
-0.661	-0.24	-0.184	-0.0428	-0.637	0.948	1.52	0.639		-0.259	-0.0441	0.379	-0.607	1.72	-0.5
-1.27	0.12	-0.354	0.865	-0.763	1.03	1.61	0.583		0.2	0.751	1.73	-0.619	1.25	-0.158
-0.529	0.239	0.177	0.712	-1.1	1.02	1.46	0.482		1.04	-0.271	1.79	-0.633	1.04	-0.172
-0.652	0.351	1.09	0.201	-1.04	1.24	0.957	0.208		-0.896	-0.466	2.08	-0.639	1.34	-0.846
-0.614	0.478	0.425	0.0206	-0.682	1.38	0.548	1.19		0.244	-0.709	1.27	-0.569	1.54	-0.0405
-0.447	0.346	0.56	-0.543	-0.977	0.963	0.777	0.501		1.14	0.176	0.902	-0.367	1.5	-1.26
-0.544	0.394	0.391	0.161	-1.1	0.756	1.21	0.627		0.736	-0.245	0.746	-0.68	-0.206	-0.654
-0.53	0.292	-0.29	0.405	-0.598	1.77	1.39	0.133		0.403	-0.597	2.68	-0.524	0.715	-1.04
-0.622	0.741	0.123	-0.621	-0.222	2.75	1.17	0.428		0.422	-0.56	1.51	-0.541	0.0436	-0.732
-0.443	0.726	-0.0167	0.27	-0.211	3.26	0.611	0.214		1.35	-0.407	2.06	-0.655	1.02	-0.584
-0.565	0.718	0.287	1.09	-0.315	3.23	0.889	-0.128		1.4	-0.353	0.386	-0.747	0.575	-0.917
-0.536	0.381	0.0887	-0.342	-0.368	3.08	1.43	0.377		0.757	-0.501	0.959	-0.777	0.381	-0.977
-0.47	0.732	0.047	-0.000618	-0.573	3.04	1.1	1.19		0.626	-0.352	1.11	-0.611	0.322	-1.1
-0.768	0.501	0.249	0.268	-0.958	2.74	0.663	1.75		1.97	-1.64	0.00924	-0.727	0.506	-0.666
-0.908	0.6	-0.387	0.534	-0.582	2.37	0.936	0.333		0.473	-0.614	0.689	-0.588	0.649	-0.685
-0.785	1.04	0.0366	0.741	0.0124	2.28	1.37	0.598		-0.148	-1.14	0.553	-0.661	1.45	-0.713
-0.722	1.11	0.3	0.123	0.0581	2.08	1.31	0.491		0.449	-0.631	0.692	-0.469	0.925	-1.51
-0.354	1.3	0.129	0.202	-0.351	1.87	0.976	1.1		1.55	-0.453	1.01	-0.349	0.446	-0.711
-0.322	1.18	0.29	0.54	-0.555	1.89	0.949	-0.214		1.21	0.243	-0.303	-0.388	0.927	-0.747
-0.682	1.05	0.302	0.611	-0.769	1.71	1.02	-0.606		-0.219	-0.262	-0.149	-0.514	1.46	-1.03
-0.161	0.778	0.694	0.544	-1.09	1.65	0.671	0.555		-0.837	-0.843	-0.318	-0.429	0.493	-0.961
-0.714	0.592	0.519	-0.0294	-0.833	1.73	1.07	0.194		-0.788	-0.585	-0.256	-0.297	1.55	-0.816
-0.908	0.604	0.715	0.287	-0.00101	1.44	1.32	1.87		-0.838	-0.453	-0.241	-0.118	-0.595	-0.427
-0.591	0.323	0.576	0.312	-0.296	1.25	0.736	0.427		0.262	-0.273	-0.00703	0.0121	0.928	-0.609
-0.519	0.244	0.102	0.214	-0.667	1.12	0.499	2.19		-1.3	-0.799	0.589	-0.052	1.02	-0.543
-0.715	0.225	-0.122	-0.562	-0.314	0.642	0.614	0.349		-1.26	-0.644	1.11	0.234	1.49	-0.473
-0.965	-0.0492	0.456	-1.4	-0.0969	0.527	0.707	0.217		1.21	-1.75	0.592	0.0603	0.615	-0.791
-0.466	0.271	0.323	-1.11	-0.248	0.964	0.724	0.274		0.323	-0.336	0.188	0.191	1.12	-0.539
-0.737	0.212	-0.057	-1.55	-0.436	1.25	0.787	1.74		-0.104	-0.592	0.847	-0.213	1.2	-0.286
-0.43	-0.166	0.9	-0.812	-0.232	1.4	0.667	0.964		-0.817	-0.754	1.22	-0.243	0.652	-0.454
-0.379	-0.54	0.0564	-0.861	-0.297	1.15	0.526	1.69		0.0137	-1.09	-0.134	-0.14	0.188	-0.165
-0.723	-0.643	0.44	-0.865	-0.811	0.865	0.801	0.0235		-0.725	-1.44	0.775	-0.142	0.778	0.00803
-0.643	-0.44	-0.768	-0.644	-0.399	1.4	0.784	0.316		-1.8	-0.618	-0.682	-0.0936	1.73	-0.41
-0.969	-0.746	-0.0123	-1.06	0.018	2.07	0.389	0.954		0.24	-0.0453	0.686	-0.297	1.79	-0.362
-0.993	-0.453	1	-0.839	-0.571	1.72	0.334	1.03		-0.837	0.245	0.669	-0.509	0.743	-0.816
-0.697	-0.864	0.351	-1.17	-0.529	1.3	0.93	1.96		1.61	0.0871	0.41	-0.324	1.19	-0.617
-0.624	-0.686	-0.32	-1.27	0.0114	2.16	1.27	1.53		0.0142	0.277	0.959	-0.381	1.51	-0.613
-0.312	0.229	-0.543	-1.34	0.0113	3.74	1.12	1.76		-1.07	-0.839	0.068	-0.342	0.846	-0.618
-0.362	1.1	0.0285	-1.36	-0.186	5.29	0.797	2.63		-0.796	-2	0.509	-0.54	0.709	-0.651
-0.0327	1.92	0.61	-1.42	-0.337	5.85	0.687	0.838		-0.805	-0.711	0.661	-0.703	-0.0305	-0.711
0.0844	2.07	-0.417	-1.82	-0.473	5.53	0.445	0.986		-0.557	-0.00257	0.183	-0.506	1.57	-0.524
-0.24	1.98	0.877	-0.605	-0.176	5.06	0.399	2.24		0.387	0.807	1	-0.46	1.03	-1.15
-0.224	1.57	0.123	-1.21	-0.342	4.85	0.637	1.12		-1.58	1.84	1.25	-0.409	1.85	-0.338
-0.312	1.6	0.141	-0.942	-0.914	4.87	0.366	1.96		0.274	2.18	1.49	-0.317	0.772	-0.857
-0.0454	1.51	-0.0379	-2.16	-0.406	4.85	0.199	-0.227		0.404	1.51	0.289	-0.26	0.483	-0.61
0.323	1.46	-0.48	-1.72	-0.488	4.23	0.405	0.636		-0.51	2.08	0.686	-0.555	1.69	-0.403
0.156	1.35	-0.377	-1.71	-1.48	3.65	0.526	0.476		-1.15	1.73	0.914	-0.64	1.42	0.17
-0.292	1.11	0.328	-1.27	-1.23	3.45	0.349	0.206		-0.296	1.83	1.18	-0.476	1.05	0.232
0.153	1.21	0.772	-1.81	-0.435	3.26	0.384	0.716		-0.964	2.14	0.329	-0.47	0.488	0.331
0.159	0.798	0.508	-1.57	-0.295	2.76	0.902	1.09		0.537	1.55	-0.546	-0.485	0.873	0.00163
0.465	0.428	0.876	-1.67	-0.377	2.61	0.633	-0.0595		-0.501	0.984	-0.0731	-0.574	0.466	0.169
0.295	0.414	0.0248	-1.88	-0.206	2.45	0.341	0.887		-1.31	2.11	-0.878	-0.504	1.32	0.281
0.879	-0.0843	-0.521	-1.69	0.17	2.36	0.682	0.806		-0.802	2.14	-0.224	-0.472	0.554	0.387
0.306	-0.43	0.227	-1.78	-0.00126	2.16	0.841	0.295		-0.674	1.55	0.943	-0.505	1.05	-0.0742
0.387	-0.0968	0.275	-1.93	-0.37	1.88	0.743	0.187		-1.54	2.17	0.796	-0.398	0.351	0.207
-0.375	0.177	0.298	-1.09	-0.25	1.76	0.776	0.132		-0.272	0.448	0.00679	-0.484	0.885	-0.0713
0.792	-0.137	-0.117	-1.79	-0.07	2.06	0.887	2.41		-0.306	0.308	2.1	-0.406	0.689	0.0323
0.151	-0.25	-0.189	-0.839	-0.229	2.01	1.04	-0.0895		-1.33	1.71	0.237	-0.355	0.603	0.648
0.74	-0.548	-0.487	-0.804	-0.593	1.46	1.14	0.933		-1.72	1.89	0.509	-0.796	1.53	0.862
0.107	-0.35	-0.282	-1.78	-1.3	1.55	1.14	-0.386		-0.705	1.78	0.362	-0.631	1.29	0.498
0.0421	-0.314	0.442	-2.01	-1.05	2.17	0.768	0.572		-1.23	1.39	0.641	-0.769	0.924	0.199
0.35	-0.145	0.992	-1.56	-0.161	2.39	0.655	1.32		-2.42	2.1	0.0278	-0.55	0.754	0.148
0.482	0.143	1.45	-1.58	-0.316	2.6	1.2	1.63		-1.36	2.22	0.364	-0.508	1.04	0.376
0.606	-0.569	0.926	-0.963	-0.719	2.63	1.58	0.397		-1.39	1.05	-0.331	-0.734	1.97	0.256
0.51	-0.374	0.693	-1.11	-0.459	2.33	1.24	0.904		-0.635	1.34	0.216	-0.57	0.712	-0.159
0.378	-0.513	1.07	-0.898	0.0137	1.92	0.927	0.645		0.632	1.99	1.2	-0.467	1.13	0.0781
0.274	-0.64	-0.384	-1.01	0.114	1.99	0.883	0.489		-1.2	0.99	1.9	-0.519	1.97	0.155
0.163	-0.443	-0.944	-1.44	-0.416	1.57	0.646	0.337		-0.444	0.823	1.43	-0.553	1.77	-0.463
0.311	-0.153	-0.33	-1.26	-0.783	1.38	0.384	2.44		-1.62	2.27	1.44	-0.748	0.774	0.0988
-0.317	-0.414	0.658	-1.38	-0.769	2.09	0.333	0.993		0.292	0.651	0.577	-0.722	0.47	-0.135
0.28	-0.328	0.381	0.000214	-0.696	2.35	0.505	-0.454		-0.371	0.971	0.684	-0.869	0.876	-0.964
0.235	-0.393	-0.0653	1.11	-0.552	2.1	0.763	1.6		-1.39	1.47	0.0746	-0.694	0.873	-0.691
-0.0495	-0.298	0.716	-0.00203	-0.296	1.88	1.31	1.73		-1.01	0.983	1.07	-0.633	0.0999	-0.799
0.285	-0.671	1.39	-0.176	-0.818	2.01	1.67	-0.124		-0.228	1.19	-1.04	-0.495	0.762	-0.574
0.00344	-0.672	0.379	-0.342	-1.33	2.41	1.24	1.05		0.0218	-0.0856	-0.503	-0.724	1.58	-0.944
0.446	-0.309	0.0115	1.4	-0.684	2.34	0.677	0.631		1.23	-0.133	-1.18	-0.677	-0.881	-0.825
0.327	-0.615	0.132	0.333	-0.142	2.09	0.491	1.86		0.488	0.309	-0.032	-0.869	-0.0357	-0.521
0.255	-0.4	0.144	0.0603	-0.178	1.83	0.663	0.707		1.19	0.265	1.79	-0.886	0.48	-0.524
0.0309	-0.627	0.0334	0.218	-0.191	1.56	0.834	0.649		1.66	0.644	0.468	-0.996	-0.782	-0.629
0.605	-0.735	0.363	0.654	-0.719	1.54	1.16	-0.374		0.952	1.35	0.902	-0.733	0.45	-1.07
-0.0803	-0.749	0.313	0.731	-0.962	1.67	1.35	0.0878		-0.0483	0.821	0.707	-0.944	0.291	-0.691
-0.0752	-1.09	0.369	0.00888	-0.548	1.36	0.817	1.88		1.92	0.829	1.1	-0.82	-0.272	-0.661
0.448	-1.24	0.363	0.0829	-0.404	1.01	0.527	1.36		1.44	0.00325	0.687	-0.815	0.765	-0.362
0.969	-1.26	0.464	0.232	-0.272	1.56	0.838	0.856		0.448	0.0651	0.246	-0.568	-0.293	-0.913
0.867	-1.45	0.255	0.336	0.0254	2.12	0.634	1.87		-0.231	0.448	0.141	-0.937	-1.03	-0.885
0.976	-1.24	0.414	0.393	-0.264	2.03	0.123	1.07		-0.204	0.649	0.463	-0.83	0.787	-0.075
0.553	-1.27	1.13	0.152	-0.632	1.81	0.277	1.23		1.8	0.824	-0.979	-0.917	0.191	-0.737
0.789	-1.72	0.417	0.176	-0.577	1.38	0.728	0.854		1.05	1.1	-1.04	-0.924	1.06	-0.64
0.615	-1.57	0.336	0.502	-0.388	0.885	0.492	1.73		0.191	-0.188	-0.192	-1.06	1.42	-1.02
0.408	-1.87	0.987	0.791	-0.188	0.514	-0.258	0.419		0.991	0.339	1.01	-0.893	0.0404	-0.772
0.716	-1.31	1.21	0.599	-0.128	0.659	-0.161	0.593		-0.266	0.805	1.15	-0.797	0.715	-0.439
0.176	-1.18	1.77	0.308	-0.341	1.01	0.311	0.509		-0.115	0.133	0.567	-0.674	0.19	-0.225
1.22	-1.12	1.99	0.12	-0.41	0.753	0.583	0.917		0.339	-0.0429	0.599	-0.695	0.431	-0.419
0.51	-1.17	1.6	0.609	-0.237	0.203	0.634	1.42		1.31	0.0262	-0.413	-0.557	-1.06	-0.51
0.953	-1.47	1.1	0.646	-0.562	-0.0593	0.235	0.13		0.23	0.532	-0.119	-0.698	-1.34	-0.501
1.07	-1.55	0.811	0.172	-0.794	0.211	-0.00537	0.628		-0.137	0.915	0.371	-0.637	-0.859	-0.343
0.682	-1.82	1.49	0.144	-0.377	0.614	0.403	0.668		0.558	-0.457	-0.0896	-0.635	-1.95	-0.631
0.6	-1.5	1.32	0.899	-0.124	1	0.692	1.08		0.101	0.121	0.211	-0.648	-0.698	-0.693
1.2	-1.83	1.52	-0.273	-0.00363	1.03	0.714	0.355		-0.609	1.71	-1.52	-0.436	-0.717	-0.666
1.06	-1.65	1.24	-0.0238	0.0251	0.59	0.543	-0.613		0.559	0.787	-1.16	-0.44	0.463	-0.47
0.911	-2.09	1.21	0.128	-0.163	0.194	0.431	0.716		0.00372	0.713	-0.293	-0.317	-0.71	-0.754
1.33	-1.75	1.55	0.3	-0.369	0.21	0.61	1.02		1.1	1.11	0.725	-0.298	0.065	-0.932
1.09	-1.49	1.12	0.24	-0.156	0.429	0.615	0.959		1.62	1.83	1.01	-0.318	-0.538	-0.744
0.689	-0.981	0.812	0.333	0.0102	0.95	0.34	1.19		0.332	0.622	0.0614	-0.323	-0.75	-0.645
1.27	-1.04	0.874	-0.34	-0.298	0.475	0.318	-0.198		-0.231	0.0458	-0.847	-0.604	-0.205	-0.638
0.973	-0.823	0.855	-1.19	-0.576	-0.0523	0.358	-0.616		0.39	-0.613	-0.599	-0.403	0.823	-1.1
0.628	-1.05	1.73	-1.13	-0.446	0.728	0.0906	0.333		1.93	0.622	0.278	-0.455	0.144	-0.949
0.59	-0.844	0.246	-0.0152	-0.791	1.19	-0.0525	0.264		1.11	1.55	-0.315	-0.43	0.843	-0.919
1.26	-0.713	0.94	0.0568	-1.07	0.838	0.13	0.745		1.11	0.0692	-0.63	-0.44	0.0508	-0.415
0.901	-0.757	1.37	-0.414	-0.582	0.436	0.173	-0.383		1.45	0.342	0.67	-0.483	0.664	-0.615
0.792	-0.855	1.36	-0.694	-0.122	0.404	0.292	0.4		1.29	0.543	-0.201	-0.576	-1.17	-1.19
0.712	-0.573	1.68	-0.951	-0.471	0.298	0.597	1.68		0.134	2.37	0.328	-0.228	1.31	-1.07
1.13	-0.552	1.72	-0.408	-0.648	0.239	0.712	-0.0596		0.886	0.423	-0.271	-0.515	0.889	-0.892
1.42	-0.315	1.41	-0.754	-0.584	0.68	0.27	-0.316		1.18	0.42	0.484	-0.676	1.38	-0.786
0.444	-0.757	2.28	-0.48	-0.392	0.853	0.198	0.0503		0.568	0.319	-0.116	-0.467	2.1	-0.952
1.32	-0.677	1.05	-1.63	0.0114	0.417	0.457	0.412		-0.144	0.405	-0.192	-0.667	1.88	-0.482
0.61	-0.672	0.842	0.121	-0.0248	0.659	0.311	0.69		0.35	1.04	-0.516	-0.638	3.28	-0.812
0.593	-0.526	1.23	-1.51	-0.536	1.16	0.0827	-0.6		0.477	0.921	-0.361	-0.574	1.73	-0.842
1.2	-0.498	0.512	-1.37	-0.692	1.34	0.135	0.625		0.978	1.91	-0.78	-0.313	0.0487	-0.488
0.931	-0.122	0.815	-0.997	-0.622	1.69	0.227	-0.489		-0.485	0.302	0.279	-0.657	0.517	-0.251
0.682	-0.632	0.77	-0.534	-0.819	1.84	0.438	0.476		0.376	1.16	0.22	-0.391	1.32	-0.283
1.25	-0.462	1.54	-1.02	-0.63	1.29	0.473	1.48		1.31	1.66	-0.16	-0.478	-0.251	-0.891
0.687	-0.914	0.364	-1.28	-0.593	0.94	-0.172	1.87		2.2	1.02	1.82	-0.453	0.816	-0.823
0.808	-0.863	1.02	-0.185	-1.06	1.28	-0.421	1.13		2.77	1.17	2.71	-0.417	0.344	-1.02
0.576	-0.27	0.559	-0.125	-1.35	1.41	-0.166	-1.64		1.26	0.316	0.125	-0.442	0.851	-0.802
0.81	-0.0459	0.653	-0.935	-1.34	0.879	-0.0792	0.502		1.08	-0.0849	-0.597	-0.414	1.29	-0.812
1.05	-0.315	2.01	-0.924	-1.44	0.574	0.217	1.06		1.2	0.65	0.5	-0.424	1.4	-0.712
0.679	-0.546	1.03	-1.66	-1.28	0.552	0.635	-0.143		1.39	0.47	0.751	-0.541	0.64	-0.664
0.411	-0.329	0.587	-1.34	-0.849	0.577	0.706	0.601		0.916	0.927	1.17	-0.446	1.63	-0.906
0.307	-0.48	1.79	-1.17	-0.428	0.803	0.633	0.153		1.35	0.266	0.849	-0.322	1.05	-0.941
0.504	-0.197	0.998	-0.248	-0.158	0.802	0.632	-1.16		2.13	-0.461	-0.0632	-0.45	1.12	-1.28
-0.109	0.0888	0.571	-0.556	-0.374	0.38	0.671	0.389		0.93	-0.161	1.27	-0.351	1.38	-0.892
-0.974	0.725	0.625	0.137	-0.737	0.4	0.709	0.868		1.98	-0.0138	0.667	-0.229	-0.554	-0.444
-0.29	0.73	0.615	-0.309	-0.964	0.69	0.726	0.6		2.45	0.0506	2.24	-0.283	-0.534	-0.354
-0.686	0.516	-0.615	-0.871	-0.834	0.895	0.809	0.546		1.26	0.0945	2.02	-0.105	1.2	-0.756
-0.258	0.157	0.515	-0.611	-0.602	1.19	0.695	1.27		0.673	0.569	0.731	-0.0804	0.266	-0.753
-0.628	0.177	0.389	-0.507	-0.995	0.933	0.735	2.18		1.59	-0.911	2.14	0.0339	0.884	-1.03
0.104	0.196	0.473	-0.409	-1.65	0.347	0.63	1.4		1.94	-0.0966	1.48	-0.0126	1.02	-0.94
-0.2	0.458	-0.152	-0.243	-1.44	0.384	0.647	1.03		2.13	0.293	3.07	-0.215	1.14	-0.991
0.21	0.511	0.251	0.198	-0.754	0.44	1	2.43		0.632	1.06	0.865	-0.116	-0.0624	-0.685
0.207	0.111	0.667	-0.338	-0.81	0.468	1.02	-0.265		1.95	0.693	0.961	-0.162	1.81	-0.934
0.0877	-0.351	1.33	-1.25	-1.13	0.649	0.677	0.502		0.742	-0.478	0.329	-0.0331	1.36	-1.13
0.483	-0.539	0.459	0.275	-1.15	0.654	0.538	0.886		1.96	-0.32	-0.669	-0.209	1.67	-0.998
0.569	-0.428	0.0858	-0.436	-1.19	0.533	0.625	-0.326		0.117	-0.854	0.583	-0.365	1.73	-0.929
-0.177	-0.486	0.31	-0.0667	-0.953	0.137	0.727	-0.0942		0.936	0.59	0.517	-0.133	1.73	-0.817
0.182	-0.505	1.43	-0.0132	-0.466	-0.305	0.851	0.903		0.369	-0.295	0.633	-0.39	0.573	-0.875
0.411	-0.658	0.0493	0.222	-0.646	-0.177	0.791	0.392		0.954	0.144	-0.116	-0.412	1.49	-0.753
0.39	-0.662	0.245	-0.721	-0.613	0.149	0.317	0.179		1.85	-0.421	0.577	-0.32	0.968	-1.08
0.141	-0.405	0.416	0.368	-0.487	0.257	0.156	0.988		1.76	0.985	0.0539	-0.583	0.276	-1.23
-0.361	-0.255	0.301	0.302	-0.733	0.2	0.418	0.532		0.906	-0.529	-0.192	-0.469	2.24	-1.11
0.319	-0.557	0.734	-0.105	-0.92	0.27	0.761	-0.0765		0.388	-0.177	-0.25	-0.609	0.625	-0.448
0.144	-0.475	0.12	-0.0247	-0.681	0.284	0.87	1.72		2	-0.935	1.31	-0.502	0.586	-0.39
0.411	-0.622	0.068	0.67	-0.446	0.255	0.744	0.43		1.08	-0.406	0.533	-0.317	-0.262	-0.242
0.264	-1.12	0.445	0.112	-0.47	0.247	0.589	0.911		2.63	0.312	0.746	-0.448	0.0698	-0.42
0.0417	-0.768	-0.159	0.381	-0.467	0.405	0.724	1.28		1.97	-0.836	-0.658	-0.395	-0.107	-0.0771
0.141	-1.11	0.0965	-0.531	0.0675	0.346	0.495	0.381		-0.5	0.304	-0.291	-0.436	-0.575	-0.0812
-0.255	-0.881	0.0311	0.94	0.0366	-0.177	0.32	1.18		0.859	-0.733	-1.67	-0.399	0.129	0.0738
0.112	-0.618	-0.239	0.178	-0.778	-0.455	0.601	-0.889		1.02	-1.04	-0.354	-0.379	0.128	-0.455
-0.176	-0.59	-0.0267	-0.222	-0.386	0.208	0.744	0.0729		1.6	-0.459	-0.295	-0.276	0.361	-0.214
-0.221	-0.54	0.657	-0.662	0.105	0.679	0.691	-0.342		0.858	-0.807	0.0379	-0.426	0.514	-0.857
0.00433	-0.591	-0.375	-0.481	-0.448	0.0527	0.439	0.52		0.158	0.0647	1.39	-0.328	-0.0919	-0.104
-0.43	-0.614	0.0499	0.0416	-0.231	-0.563	0.359	-0.27		0.489	-0.717	0.431	-0.388	0.209	-0.727
-0.302	-0.565	-0.118	-0.289	0.00327	-0.546	0.745	-0.425		-0.141	-0.79	1.52	-0.378	1.57	-0.907
-0.189	0.0342	-0.574	-0.267	-0.57	-0.538	0.701	1.81		1.15	-0.665	0.554	-0.412	0.898	-0.712
-0.539	-0.0986	-0.0433	0.548	-0.685	-0.853	0.233	0.357		0.336	-0.6	1.14	-0.522	0.803	-0.81
0.245	-0.0995	1.04	0.42	-0.836	-0.878	0.0419	0.662		2.89	-0.889	0.28	-0.353	-0.0537	-0.958
-0.0812	0.025	0.715	0.336	-0.986	-0.422	0.0888	0.89		2.62	-1.08	-0.761	-0.367	0.0479	-1.2
0.475	-0.2	1.14	0.643	-0.33	-0.578	0.253	0.536		2.53	-1.65	-0.485	-0.284	0.0596	-1.04
0.144	-0.164	0.91	0.306	-0.149	-0.887	0.544	1.42		2.84	-0.901	0.0171	-0.218	-0.00368	-0.986
-0.278	-0.214	0.946	0.995	-0.32	-0.49	0.718	-0.673		2.38	-1.76	-0.718	-0.237	-0.202	-0.877
0.587	-0.121	0.806	1.42	-0.205	0.00899	0.406	0.843		1.17	-1.19	-0.0532	-0.326	0.932	-0.611
-0.0968	-0.132	1.39	1.13	0.0895	0.228	0.216	0.836		1.27	-0.216	-0.687	-0.354	0.206	-0.427
-0.197	-0.353	1.32	0.866	0.303	0.287	0.302	0.733		1.46	-0.734	-0.106	-0.39	0.522	-0.932
-0.119	-0.5	1.9	0.331	-0.179	0.242	0.195	-0.0456		1.8	-1.21	0.513	-0.518	0.246	-1.22
0.0348	-0.691	1.7	0.325	-0.491	0.0159	0.34	0.226		1.38	-0.141	0.824	-0.406	-0.349	-0.819
-0.596	-0.939	1.15	1.3	-0.00271	0.349	0.804	-0.555		0.412	-0.179	2.06	-0.621	-0.944	-0.809
-0.224	-1.07	0.778	1.09	0.583	0.659	0.761	-0.936		1.8	-1.16	1.9	-0.549	-0.789	-0.407
0.382	-1.02	1.54	1.03	0.644	0.376	0.385	-2.02		1.55	-0.897	2.98	-0.683	-0.0171	-1.46
0.314	-1.01	1.28	1.12	0.994	0.159	0.326	1.37		0.472	-0.744	1.65	-0.772	0.0146	-0.879
0.786	-0.601	0.733	1.16	1.56	0.185	0.408	1.12		0.402	-1.48	1.44	-0.736	2.04	-0.887
-0.15	-0.417	1.16	1.48	0.922	-0.272	0.573	0.357		1.26	0.219	0.0722	-0.496	0.545	-1.05
0.268	-0.345	0.305	1.73	0.365	-0.484	0.658	-0.0904		1.03	0.229	0.787	-0.665	0.918	-0.877
0.969	0.0485	0.782	1.42	0.416	-0.69	0.577	-0.349		2.13	0.0193	1.36	-0.44	0.227	-0.875
0.506	-0.0806	0.952	2.16	0.918	-0.711	0.421	0.549		2.05	0.123	0.645	-0.605	0.668	-0.9
0.0299	0.355	1.07	2.06	1.29	-0.46	0.466	-0.567		2.01	0.588	0.731	-0.417	0.54	-0.957
0.341	0.372	1.19	2.35	0.871	-0.341	0.7	0.179		2.13	0.708	0.54	-0.257	1.05	-1.21
0.667	0.643	-0.235	1.56	0.545	-0.337	0.848	0.61		3.32	0.741	-0.423	-0.644	0.329	-1.18
0.725	1.22	0.688	1.46	0.585	-0.477	0.793	-0.228		2.69	1.64	0.336	-0.483	0.394	-0.85
0.533	1.23	-0.132	1.89	0.369	-0.554	0.656	0.859		2.57	0.699	0.788	-0.601	1.11	-1.54
0.771	0.947	0.261	2.45	0.616	-0.446	0.631	0.648		2.27	1.01	1.28	-0.507	1.13	-1.02
0.826	0.679	0.425	1.63	0.584	-0.288	0.759	0.417		2.52	0.863	1.46	-0.587	0.919	-1.33
0.66	0.586	0.795	0.862	0.264	-0.156	0.68	-0.243		1.59	0.305	1.01	-0.647	-0.0204	-1.04
0.394	0.978	0.634	1.44	0.108	0.022	0.669	0.233		2.54	-0.128	0.0157	-0.519	0.25	-1.22
0.0902	1.02	1.09	1.55	0.0347	-0.381	0.587	-0.124		0.404	-0.401	0.209	-0.619	0.222	-1.11
-0.0621	0.61	0.497	1.19	0.322	-0.877	0.258	0.704		3.1	0.396	0.341	-0.634	1.21	-0.95
0.666	0.346	1.04	1.41	0.69	-0.718	0.654	0.0456		1.36	0.745	-0.0495	-0.554	0.84	-1.39
0.461	0.501	0.461	1.16	0.698	-0.158	0.785	0.327		2.19	1.15	-0.365	-0.555	0.393	-1.64
0.383	0.445	0.135	1.5	0.105	-0.109	0.182	0.514		1.96	0.476	-0.144	-0.32	1.64	-1.47
0.169	-0.118	-0.246	0.76	0.136	-0.339	-0.0813	0.335		3.15	0.875	0.517	-0.367	-0.0316	-1.1
0.101	-0.0984	-0.0811	0.863	0.84	-0.237	0.599	-0.547		1.05	0.406	-0.438	-0.305	-0.341	-1.29
0.814	0.106	0.312	0.953	1.14	-0.0374	1.28	0.531		2.01	0.149	0.142	-0.63	0.0879	-1.56
0.449	0.415	-0.408	0.662	0.852	-0.171	0.978	-1.08		1.36	-0.127	-0.193	-0.422	0.792	-1.6
0.298	0.00327	-0.147	1.36	0.518	-0.0828	0.536	0.852		2	-0.535	0.583	-0.318	0.514	-1.18
0.374	-0.181	0.00815	1.21	0.559	-0.014	0.748	-1.3		1.29	-0.213	0.0817	-0.576	0.28	-0.794
0.0314	-0.216	0.939	1.08	0.531	-0.401	1.04	0.0127		0.992	-0.749	-0.677	-0.48	0.387	-1.12
0.348	0.256	0.835	0.735	-0.117	-0.496	0.882	0.965		1.85	-0.0482	-0.644	-0.773	0.271	-0.739
0.441	0.213	0.417	1.51	-0.739	-0.0638	0.718	1.4		1.76	-0.185	0.599	-0.479	0.064	-0.809
0.178	0.152	-0.0405	1.74	-0.626	-0.000577	0.685	1.44		1.64	-1.3	-0.396	-0.673	0.707	-0.52
-0.146	0.286	-0.0619	1.75	0.219	-0.354	0.784	-0.512		0.589	-0.87	-0.314	-0.497	-0.329	-1.08
0.164	0.273	0.202	1.99	0.407	-0.173	0.473	-0.0285		0.716	-1.22	-0.196	-0.503	-0.584	-0.949
0.428	0.299	0.32	1.67	0.0586	0.0992	0.242	0.415		0.623	-1.15	-0.592	-0.478	0.141	-0.898
-0.0654	0.306	-0.579	1.61	-0.0992	-0.472	0.387	0.527		1.42	0.189	1.26	-0.643	-0.274	-0.604
0.19	0.15	0.353	1.33	-0.0411	-0.0472	0.814	-0.255		-0.297	-0.575	-0.655	-0.52	-0.543	-0.687
0.624	0.0746	0.537	1.54	0.0875	0.825	0.917	1.27		0.882	-0.923	1.57	-0.407	-0.607	-0.929
-0.443	0.234	-0.661	1.02	-0.02	-0.0202	0.996	0.0258		1.13	-0.957	-0.649	-0.399	0.511	-0.821
-0.429	0.144	1.04	1.68	-0.322	-0.447	1.25	1.38		-0.369	-0.208	-0.366	-0.308	0.266	-0.85
-0.151	0.451	-0.358	1.7	-0.587	0.623	1.36	1.17		0.447	0.0863	0.988	-0.335	-0.229	-0.987
-0.129	0.401	0.375	2.42	-0.325	0.766	0.908	-0.885		2.45	-1.09	1.81	-0.294	-0.0788	-0.647
-0.165	0.407	0.284	2.27	0.155	0.101	0.709	-0.0464		1.67	-0.318	1.3	-0.24	0.343	-1.02
-0.535	0.24	-0.468	0.905	0.0796	-0.207	0.936	-0.477		1.88	-0.683	0.154	-0.235	-0.0814	-1.65
-0.502	0.168	0.0857	1.26	0.0581	-0.148	1.04	0.901		1.86	0.112	0.0838	-0.33	1.08	-1.07
0.358	0.00267	0.404	1.4	0.537	-0.297	0.759	1.01		3.05	-0.541	-0.625	-0.36	0.166	-0.929
0.815	-0.29	0.413	1.08	0.378	-0.547	0.928	0.16		2.7	-0.897	-0.082	-0.447	1.04	-1.17
-0.323	-0.54	0.468	1.19	0.0618	-0.503	1.29	0.732		2.23	-0.69	-1.17	-0.432	0.676	-1.26
0.0707	-0.901	-0.0433	0.347	0.324	-0.198	1.29	-0.44		2.13	-0.59	-1.2	-0.341	-0.312	-1.76
0.764	-1.01	0.461	1.5	0.463	-0.0527	1.34	-0.0536		1.71	-0.788	-0.541	-0.217	1.72	-1.38
0.67	-1.17	0.292	1.11	0.261	-0.232	1.44	1.27		0.535	-0.562	0.45	-0.172	1.08	-1.42
0.513	-0.708	0.791	1.03	0.111	-0.204	1.18	-0.787		1.12	-0.0674	0.179	-0.489	1.03	-1.22
0.0492	-1.06	1.08	0.68	0.14	0.355	0.746	0.503		1.25	-1.45	-1	-0.484	2.17	-0.74
0.392	-0.883	1.61	0.31	-0.0897	0.0872	0.54	0.725		0.904	-1.62	-0.107	-0.303	-0.44	-1.09
-0.109	-1.46	0.427	0.531	-0.235	-0.385	0.757	0.39		2.74	-0.682	0.373	-0.531	0.701	-1.31
0.145	-1.08	0.537	1.26	0.177	-0.203	0.787	0.602		1.28	-1.58	-1.25	-0.61	0.883	-1.21
-0.0139	-1.16	-0.601	1.07	0.398	-0.0973	0.704	1.08		1.15	-0.355	1	-0.406	0.494	-1.49
-0.3	-0.483	-0.18	1.68	0.124	-0.26	0.761	1.21		1.41	-1.21	0.941	-0.399	0.859	-1.13
0.448	-0.781	-0.488	1.73	0.0576	-0.141	0.771	-0.223		0.975	-1.23	1.2	-0.466	-0.496	-0.641
0.0541	-1.09	0.251	1.61	0.236	-0.0784	0.346	0.997		0.285	-0.973	1.06	-0.538	0.347	-0.768
0.182	-1.64	0.0754	0.337	0.0112	-0.201	0.211	-0.864		2.58	-0.708	-0.599	-0.491	0.208	-0.131
0.388	-1.29	0.361	0.277	-0.27	-0.368	0.531	-0.0363		1.51	-0.541	-0.18	-0.505	0.388	0.421
0.226	-0.656	0.154	1.12	-0.00458	-0.179	0.58	-0.442		-0.0464	0.0709	-0.178	-0.505	-0.389	-0.289
0.141	-0.927	1.21	1.78	0.305	0.31	0.462	1.18		1.95	1.23	0.417	-0.633	-0.291	-0.124
0.872	-1.13	0.852	1.38	0.433	0.197	0.621	0.155		1.95	0.283	0.253	-0.674	0.407	-0.358
1.05	-0.942	0.349	1.02	0.253	-0.29	0.297	-0.61		2.69	-1.18	-0.99	-0.799	-0.4	0.0117
0.747	-0.815	0.395	1.05	-0.47	-0.258	0.0899	0.366		2.88	-0.299	-0.9	-0.597	0.469	0.153
0.499	-1.02	1.22	1.17	-0.855	0.0344	0.305	0.565		2.15	0.195	-0.547	-0.577	0.168	-0.581
0.656	-1.03	0.392	1.37	-0.438	0.223	0.409	1.03		2.48	-0.132	-0.976	-0.681	-0.0907	-0.638
0.944	-1.07	0.436	1.28	-0.325	0.211	0.192	0.345		2.37	0.322	-1.1	-0.703	-0.0922	-0.438
0.308	-0.934	-0.308	0.632	-0.421	0.214	0.0262	-0.311		2.23	1.33	-0.0511	-0.619	0.187	-0.435
0.452	-1.1	-0.685	-0.591	-0.0806	0.168	-0.0506	1.04		2.34	0.524	-1.22	-0.675	0.854	-0.922
0.0098	-1.11	0.641	0.262	0.563	0.0831	-0.0319	-0.178		4.36	0.624	-1.06	-0.633	-0.883	-0.633
-0.033	-1.04	-0.26	0.89	0.433	-0.101	0.0907	0.919		3.04	0.547	-0.72	-0.567	1.11	-0.651
0.6	-1.4	-0.137	-0.335	0.0858	-0.0555	0.233	1.15		2.65	2.04	0.221	-0.557	-0.456	-0.811
0.549	-1.49	-0.175	-0.24	-0.112	0.334	0.391	0.795		2.66	1.79	0.09	-0.678	0.904	-1.42
0.791	-1.3	-0.397	0.606	-0.343	0.384	0.136	0.321		4.62	1.02	0.479	-0.498	-0.461	-1.16
0.383	-1.37	-0.156	0.284	-0.312	0.218	0.0194	1.38		2.55	-0.153	-0.5	-0.594	-0.443	-0.687
0.496	-1.17	1.21	0.46	0.17	0.253	0.675	0.189		3.62	0.486	-0.272	-0.514	-0.354	-0.621
0.599	-1.42	0.885	0.602	0.609	0.199	0.798	0.571		3.45	0.736	0.432	-0.624	1.34	-0.674
1.2	-1.33	0.761	0.781	0.0579	0.113	0.248	-0.204		2.42	0.125	1.1	-0.554	0.84	-0.606
0.0341	-1.48	0.459	2.64	-0.712	0.249	-0.173	0.237		2.12	0.132	0.25	-0.519	0.137	-0.849
0.187	-1.76	0.345	1.58	-0.163	0.274	-0.126	1.85		2.56	1.62	-0.304	-0.557	0.0404	-0.13
0.259	-1	0.172	0.203	0.555	0.000714	0.00564	0.667		2.16	0.416	0.63	-0.708	0.802	-0.665
0.265	-0.747	0.575	0.251	0.462	0.24	0.242	0.28		3.41	0.98	0.491	-0.594	-0.6	0.0019
0.391	-0.445	1.02	0.846	0.205	0.543	0.609	-0.174		2.26	0.383	0.0648	-0.578	0.426	0.138
0.517	-0.651	0.77	1.07	0.0441	0.436	0.81	0.377		3.08	-0.792	0.231	-0.584	-0.455	0.336
0.433	-1.16	0.406	1.15	0.044	0.175	0.605	-0.0567		2.29	0.72	-1.03	-0.67	0.308	-0.111
0.204	-1.08	-0.092	0.872	0.438	0.0942	0.64	-1.04		1.92	0.774	0.359	-0.562	-0.508	0.0193
0.0564	-0.675	0.37	0.911	0.0304	0.483	0.956	-0.999		1.18	2.33	0.0435	-0.601	0.906	0.104
0.358	-0.615	1.02	-0.0105	-0.416	0.405	0.564	0.451		1.8	1.91	0.107	-0.631	0.879	-0.0447
-0.0468	-0.72	0.249	-0.601	-0.0416	0.145	0.0359	0.398		2.11	1.36	-0.0136	-0.672	1.22	0.171
0.456	-0.284	-0.167	-0.618	0.391	0.506	0.453	0.871		2.83	1.57	0.279	-0.814	0.554	0.233
0.472	-0.535	0.906	-0.0705	0.286	0.449	0.985	0.902		2.31	0.315	0.624	-0.802	0.741	0.178
0.857	-0.397	0.41	0.339	-0.15	0.245	0.93	0.127		4.21	-0.1	-1.54	-0.657	-0.327	0.249
0.339	-0.542	-0.119	0.236	-0.227	0.419	0.823	0.387		3.22	1.27	0.902	-0.823	-0.0391	-0.0905
0.918	-0.744	0.265	-0.489	0.0945	0.517	0.596	-0.477		1.66	0.241	0.505	-0.953	-0.599	-0.66
0.467	-0.468	0.741	0.00833	-0.0181	0.203	0.444	0.627		1.91	0.705	-0.792	-0.847	-0.521	-0.24
0.64	-0.345	-0.287	0.228	-0.532	0.113	0.622	0.175		1.04	0.47	1.09	-0.775	-0.692	0.0854
0.671	-0.817	-0.178	0.44	-0.63	-0.312	0.886	-0.977		0.416	1.09	0.844	-0.786	0.173	0.158
1.26	-0.624	-0.18	-0.347	-0.322	-0.167	0.815	-1.94		1.54	0.0789	1.85	-0.876	-0.146	0.0223
1.05	-0.698	0.196	-0.593	-0.14	0.778	0.523	1.04		0.639	-0.1	-1.21	-0.778	0.395	-0.439
0.897	-0.991	0.25	-0.244	-0.496	1.26	0.762	-1.79		1.96	-0.373	-0.391	-0.882	-0.542	-0.681
1.19	-0.882	0.411	-0.718	-0.78	0.784	0.981	0.571		0.809	-0.39	-1	-1.02	-0.0939	-0.287
0.294	-1.13	0.025	-0.319	-0.37	0.125	0.843	0.683		-0.404	1.52	0.27	-0.797	-1.05	-0.42
0.553	-1.01	-0.135	0.0781	0.0346	0.205	0.434	1.8		1.39	-0.24	1.58	-0.722	-0.215	-1.09
1.01	-0.806	-0.261	0.145	0.197	0.567	0.322	-0.761		0.459	0.306	1.35	-0.631	-0.569	-0.552
0.453	-1.12	0.299	-0.125	0.246	0.691	0.638	-0.154		1.76	0.962	0.444	-0.907	-0.331	0.103
0.497	-0.89	0.515	0.174	-0.0407	1.38	0.384	-0.67		1.59	0.785	-0.826	-0.81	-0.0932	-0.681
-0.156	-0.676	0.0314	-0.197	-0.382	2.04	-0.0252	-0.317		0.318	0.561	-0.939	-0.757	0.0384	-0.38
0.269	-0.727	0.576	-0.241	0.103	2.17	0.35	-0.273		2.19	0.716	-0.751	-0.797	0.493	-0.671
0.284	-0.607	1.13	0.335	0.74	2.14	0.947	0.495		1.77	-1.44	-0.344	-0.929	-0.983	-0.71
0.461	-0.603	1.87	-0.529	0.531	1.59	0.972	-0.153		0.365	-0.339	-0.437	-1.03	0.858	-0.903
0.156	-0.939	1.61	0.139	-0.0241	1.21	0.755	-0.509		1.54	1.01	-0.251	-0.778	0.145	-0.152
0.787	-0.352	1.24	0.276	-0.655	1.13	0.474	-0.577		1.55	-0.0795	-0.356	-1.13	-0.368	-1.05
0.908	-0.836	1.78	-0.445	-0.675	0.799	0.471	-0.266		0.867	-0.968	0.628	-1.01	-0.0372	-0.536
0.947	-0.894	2.12	-0.574	-0.189	0.29	0.0509	-0.521		2.53	0.104	0.529	-0.977	0.266	-0.33
1.5	-0.721	2.81	-0.457	0.0821	0.472	-0.0719	0.563		1.08	0.36	-0.279	-0.958	-0.85	-0.358
0.667	-0.908	2.42	-0.104	-0.0498	0.998	0.266	0.786		1.54	-0.261	0.0123	-1.02	0.146	-0.229
0.372	-0.794	1.91	-0.273	-0.102	1.43	0.803	1.71		3.16	0.478	-0.522	-1.13	-0.435	-0.576
0.484	-0.909	1.92	0.0627	0.184	1.39	1.17	-0.462		1.21	1.42	-0.376	-1.06	-0.142	-0.608
0.69	-0.986	1.58	0.0516	0.00605	0.54	1.12	0.751		1.94	1.32	1.35	-1.08	-0.797	-0.864
0.868	-0.793	2.18	-0.547	-0.757	-0.0301	0.598	0.102		0.933	1.19	-0.584	-0.985	-0.216	-0.967
0.802	-0.747	1.88	-0.818	-0.995	0.166	0.12	2.6		2.54	2.04	1.05	-0.818	-0.466	-0.885
0.249	-0.719	0.649	-0.222	-0.254	0.245	0.415	0.623		1.54	2.04	0.892	-0.966	-0.773	-0.79
0.297	-0.691	0.923	0.285	0.348	-0.321	0.898	0.59		0.839	2.4	1.14	-1.07	0.99	-0.628
0.64	-0.799	0.689	0.541	0.46	-0.664	1.03	-0.243		0.235	1.72	-0.359	-1	-0.818	-1.19
0.65	-0.773	1.81	-0.213	0.715	-0.426	0.685	-0.108		-0.198	0.954	0.208	-0.809	-0.372	-1.41
0.676	-1.18	1.18	-0.476	0.244	0.139	0.349	-0.337		0.725	1.07	0.11	-1.02	0.195	-1.17
0.319	-1.08	1.1	0.00968	-0.685	0.362	0.354	0.609		0.172	1.22	0.0229	-1.02	0.337	-0.836
0.855	-1.12	1.59	-0.628	-0.0246	-0.0596	0.736	1.19		1.15	0.804	0.753	-0.906	0.074	-0.804
0.922	-0.981	1.59	-0.77	0.8	-0.215	1.08	2.11		-1.08	0.778	-1.06	-0.876	0.384	-1.03
1.02	-1.23	1.28	-0.605	0.746	-0.442	1.13	0.408		0.743	0.892	0.573	-0.662	0.96	-1.23
0.498	-1.25	0.582	-0.792	0.348	-0.51	1.16	1.46		0.782	1.93	-0.581	-0.864	1.37	-1.36
-0.16	-0.803	1.42	-1.06	0.0104	-0.198	1.26	-0.124		1.79	0.542	-0.898	-0.93	1.09	-1.54
0.453	-1.02	1.41	-0.0718	0.0293	0.295	0.969	0.172		0.931	0.541	0.407	-0.795	-0.0372	-0.705
0.609	-1.18	0.321	-0.171	-0.0112	0.238	1.01	0.0416		0.651	-0.307	-0.902	-0.855	-0.0548	-1.42
0.337	-0.894	0.142	-0.672	-0.108	-0.0555	1.19	-0.659		0.519	0.618	-0.0365	-0.915	-0.417	-0.382
0.783	-0.889	1.26	-0.888	0.124	-0.0474	0.717	1.48		-0.674	0.898	-0.0114	-0.991	0.258	-0.339
0.785	-1.08	1.1	-0.925	0.637	0.403	0.788	-0.567		0.485	0.0516	-0.282	-1.07	-0.0167	-0.546
0.37	-0.595	0.915	-1.15	1.04	0.712	1.2	1.15		2.31	0.296	0.286	-1.07	0.17	0.0396
0.303	-0.686	1.21	-0.215	0.715	0.408	0.656	0.51		-0.723	-0.456	0.166	-0.937	-0.219	0.517
0.302	-0.335	1.34	-0.0243	0.573	0.0349	0.484	-0.431		0.0637	0.781	-0.629	-0.74	0.886	0.172
0.19	-0.42	0.0843	-0.0329	1	0.0517	1.14	0.208		0.784	-0.701	0.243	-0.906	0.52	-0.115
-0.11	-0.0021	-0.0148	-1.34	1.39	0.315	1.43	0.675		-1.27	-0.0465	-0.147	-0.711	1	0.188
-0.401	-0.131	1.49	-0.138	0.968	0.209	0.821	1.67		-0.38	0.373	-0.329	-0.855	1.7	0.75
0.000405	-0.304	1.2	-1.28	0.636	0.225	0.372	1.21		-0.735	1	0.455	-0.712	0.16	0.693
0.202	-0.459	0.558	-0.952	0.995	0.461	0.284	0.321		1.96	0.734	-0.32	-0.669	0.313	0.721
0.0682	-0.0679	-0.0214	-0.72	0.879	0.108	0.731	1.35		1.73	0.987	-0.334	-0.855	2.02	0.359
0.303	-0.217	0.605	-0.565	0.287	-0.353	1.15	0.379		2.48	-0.0965	-0.609	-0.787	0.368	0.499
0.53	-0.13	0.256	-0.895	0.34	-0.224	1.28	0.51		2.04	-0.727	-1.16	-0.831	-0.293	0.372
0.0513	0.141	-0.284	-0.319	0.623	0.139	0.875	0.645		1.94	-0.645	-0.905	-0.769	0.599	0.175
0.21	-0.108	-0.258	-1.26	0.259	0.0254	0.664	0.629		0.0816	1.13	-1.05	-0.952	0.643	0.532
0.63	-0.0231	0.435	-0.496	-0.0789	-0.0664	1.1	0.381		-0.545	0.209	0.571	-0.807	0.333	0.153
-0.0327	-0.21	0.448	0.145	-0.0332	0.124	0.971	1.06		0.616	0.863	0.395	-0.946	1.88	0.201
0.438	-0.0113	0.477	-0.412	-0.0683	0.204	0.286	0.438		-0.395	0.236	0.184	-0.695	1.57	0.602
0.591	-0.0941	0.427	-0.502	-0.147	0.00541	-0.00677	0.221		0.394	0.852	0.317	-1.06	0.378	0.551
0.513	0.361	0.136	-0.598	0.0418	-0.175	0.406	0.213		0.298	0.547	1.17	-0.983	0.218	-0.0739
0.497	-0.556	0.122	-0.34	0.0797	-0.402	0.83	1.47		-0.195	0.579	-0.437	-1.19	0.493	-0.336
0.463	-0.127	0.175	0.273	0.204	-0.44	0.649	1.93		0.0548	0.825	0.269	-1.04	0.37	0.0517
0.357	-0.246	1.08	0.204	0.0911	-0.189	0.282	2.01		-0.289	-0.0674	-0.484	-1.05	0.944	-0.416
1.02	-0.455	0.21	0.171	-0.272	0.0993	0.836	1.66		0.373	0.206	0.566	-0.972	1.42	-0.252
0.678	-0.562	-0.0993	-0.483	-0.0749	0.168	1	2.31		1.43	-0.621	1.52	-0.8	1.42	-0.366
1.13	-0.102	-0.0996	-0.391	0.5	0.0654	0.61	0.751		1.41	-0.284	0.897	-0.926	-0.271	-0.137
0.278	0.266	0.471	-0.483	0.255	-0.181	0.84	1.2		0.854	-0.0888	1.15	-1.07	0.376	-0.475
0.624	1.23	0.514	-0.111	-0.113	-0.0373	1.13	2.12		1.44	-0.312	0.119	-0.804	-0.465	-0.283
0.42	1.79	0.432	-0.195	0.68	0.28	0.872	0.866		-0.208	-0.266	0.676	-0.996	1.3	0.151
0.0428	1.56	0.946	0.318	0.798	0.276	0.564	0.19		0.152	0.86	1.05	-0.928	-0.781	0.383
-0.224	1.31	0.117	-0.385	-0.0734	-0.00698	0.343	0.402		0.561	0.628	1.43	-1.06	0.205	0.862
0.29	1.24	1.33	-0.132	0.114	-0.172	0.509	0.32		0.775	1.41	1.48	-1.12	-0.115	0.649
0.182	1.19	1.3	-0.285	0.766	0.208	0.653	0.0548		0.696	0.649	0.164	-1.1	0.393	1.2
0.106	1.22	0.549	0.841	0.33	0.151	0.526	1.42		0.994	-0.288	0.509	-1.08	0.0161	0.679
0.317	1.11	0.473	0.0971	-0.536	-0.29	0.573	1		0.86	-0.317	0.566	-1.22	-0.278	1.09
0.646	1.47	1.5	-0.465	-0.28	-0.209	0.955	0.21		-0.188	0.651	1.67	-1.29	-0.11	0.676
0.696	1.1	0.682	0.364	0.413	0.165	0.485	1.98		-0.657	-0.195	0.626	-1.23	0.223	0.491
0.111	0.781	0.0525	-0.022	0.169	0.0713	0.0614	1.35		-0.248	-0.509	1.19	-1.13	0.0695	0.176
0.25	0.986	0.199	-0.347	-0.374	-0.393	0.41	-0.0134		1.11	-0.24	0.448	-1.07	0.392	0.169
0.795	0.484	-0.446	-0.0655	-0.722	-0.645	0.622	1.58		1.25	0.871	0.72	-0.989	1.37	0.7
0.152	0.298	0.0521	-0.239	-0.945	-0.392	0.645	-0.374		3.52	0.242	0.467	-1.11	-0.572	0.162
0.275	0.102	1.12	-0.149	-0.712	-0.0376	0.979	0.672		2.07	-0.0469	0.771	-1.14	-0.605	0.227
0.353	0.528	0.414	-0.00468	-0.0426	-0.291	0.616	1.49		2.02	0.385	1.04	-1.02	0.29	0.459
0.309	0.896	0.683	-0.224	0.449	-0.623	0.184	0.257		0.0926	0.0384	-0.38	-1.1	-0.266	0.215
0.301	1.1	0.492	-0.32	0.222	-0.44	0.445	1.93		1.27	0.47	0.0735	-1.02	0.858	-0.0261
0.297	0.923	0.42	-1.37	-0.479	-0.444	0.481	2.36		1.32	-0.379	-0.368	-0.923	0.174	0.19
0.0269	0.485	1.16	-1.05	-0.451	-0.549	0.418	0.224		1.72	-0.0923	-0.0538	-0.943	0.0227	0.316
0.454	0.615	0.402	-1.7	-0.00755	-0.47	0.452	1.2		0.0679	0.133	-1.59	-1.03	-0.096	-0.154
0.225	0.299	-0.191	-0.752	0.0102	-0.155	0.0776	0.577		0.222	-0.9	-0.396	-0.738	-0.179	-0.197
0.426	0.513	-0.0562	-0.719	-0.503	0.0483	-0.0957	-0.927		-0.386	-1.27	-0.461	-0.837	-0.952	0.358
0.931	0.258	0.611	-1.35	-0.413	-0.127	0.0946	0.862		0.56	-1.64	-0.59	-0.895	0.119	-0.105
0.594	-0.101	0.206	-0.477	0.431	-0.437	0.238	-0.276		-0.524	-0.036	-0.841	-0.857	0.346	-0.162
0.0289	-0.0635	0.0653	0.965	0.56	-0.23	0.219	-1.25		0.553	-0.13	0.31	-1.01	0.381	0.242
-0.26	-0.128	0.478	0.5	-0.262	-0.139	-0.105	1.45		1.21	0.66	-0.449	-1.1	0.0542	-0.171
0.225	0.0482	0.437	-0.0235	-0.0822	-0.842	0.359	1.18		-0.259	-0.81	0.476	-0.858	0.104	0.21
0.262	-0.196	-0.0747	-0.0526	0.684	-0.725	0.962	1.24		0.446	-1.14	-0.647	-0.836	-0.29	0.411
0.256	-0.287	0.675	-0.868	0.105	0.167	0.707	1.42		1.14	-0.677	-0.816	-0.89	-0.411	1.23
-0.016	-0.457	-0.27	0.0889	-0.461	0.381	0.304	0.869		2.14	2.17	-1.87	-1.11	-0.593	1.64
0.255	-0.228	-0.267	0.346	-0.123	-0.267	0.369	1		0.973	1.7	-1.45	-0.942	0.626	1.49
-0.25	0.0956	0.0211	-0.258	0.0475	-0.504	0.431	2.77		0.643	0.00281	-0.956	-1.15	-0.00623	2.12
0.896	0.00901	-0.124	-1.12	0.0898	-0.14	0.0623	0.89		1.52	0.745	-1.14	-1.07	-0.284	2.33
0.506	-0.368	-0.546	-0.389	0.128	-0.249	0.262	-1.34		1.53	0.663	-0.877	-0.952	-0.0472	2.6
0.0769	-0.169	-0.903	-0.731	-0.242	-0.79	0.318	0.0798		0.948	1.12	-0.191	-1.08	-0.268	1.59
0.38	-0.21	-0.0204	0.663	-0.484	-0.411	-0.222	-0.797		1.87	1.04	-0.539	-1.18	-0.175	1.22
-0.0514	-0.813	0.444	-0.267	0.313	0.418	-0.148	0.0463		0.387	-0.797	-1.26	-0.986	-0.194	1.56
-0.241	-0.925	-0.425	-1.24	0.686	0.308	0.572	1.1		1.18	0.0822	-0.275	-1.05	1.13	1.12
0.386	-0.805	-0.312	-0.163	-0.0706	-0.165	0.405	0.971		1.15	0.664	-0.308	-1.08	0.187	0.858
-0.192	-0.716	-0.753	-1.43	-0.362	-0.269	-0.261	-2.52		1.15	0.056	-0.742	-0.945	0.862	0.82
0.0316	-0.971	0.202	-1.14	-0.0926	-0.0625	-0.0956	-0.932		0.488	-0.492	0.65	-0.868	-0.0411	0.43
0.319	-0.904	0.155	-1.47	-0.0388	0.0142	0.522	-0.0251		1.44	-0.784	-0.47	-0.593	-0.344	0.737
0.446	-0.807	-0.826	-1.24	-0.21	-0.195	0.411	0.616		0.648	-0.224	-0.0961	-0.785	-0.459	0.375
0.234	-1.03	0.0554	-0.89	-0.151	-0.103	0.0892	-0.609		0.128	0.416	0.14	-0.757	-0.742	0.332
0.481	-0.203	0.201	-1.04	-0.22	0.451	0.32	0.75		0.564	0.127	-0.0309	-0.558	-0.581	0.157
0.706	0.0669	0.79	-0.851	-0.44	0.976	0.65	-0.338		1.85	-0.271	-0.796	-0.878	-0.106	0.354
0.144	0.125	-0.401	-1.24	-0.437	1.28	0.517	-1.22		-0.262	-0.792	1.27	-0.89	0.0929	-0.488
0.38	0.202	0.116	-1.67	-0.477	1.51	0.323	0.97		0.243	1.32	-0.0833	-0.912	0.116	-0.452
0.302	0.178	-0.265	-1.13	-0.63	1.42	0.308	0.528		1.11	-0.141	-0.0604	-0.953	0.701	-0.659
0.391	0.132	-0.0778	-1.13	-0.224	1.22	0.279	0.864		0.106	1.04	-1.04	-0.786	0.0639	-0.491
0.634	0.0621	-0.311	-0.481	0.283	1.55	-0.0152	0.889		2.08	0.665	1.09	-0.607	-1.03	-0.651
-0.0991	-0.0985	0.592	0.124	0.342	1.54	0.0309	0.246		0.37	0.729	-0.325	-0.738	-0.0739	-0.616
0.0275	-0.268	0.063	-0.55	0.728	1.06	0.38	0.3		1.3	0.00985	-0.238	-0.592	-0.403	-0.903
0.153	-0.212	0.169	-0.734	1.47	1.13	0.383	-0.0361		1.06	0.225	-0.389	-0.587	0.481	-0.671
0.838	-0.246	-0.397	-0.861	1.44	1.44	0.509	-1.41		0.154	-0.362	-1.24	-0.604	0.741	-0.904
0.627	-0.491	-0.671	-0.898	0.9	1.26	1.12	0.63		0.0119	-1.11	-0.766	-0.475	-0.527	-0.685
0.0692	-0.336	-0.527	-0.975	0.711	0.942	1.09	-0.983		0.319	-0.125	0.322	-0.585	-0.454	-0.457
-0.171	-0.0904	-0.573	-0.874	0.596	0.671	0.587	1.27		0.438	0.375	-0.326	-0.781	0.885	-0.501
0.753	0.195	-1.01	-1.76	0.188	0.312	0.357	0.214		0.146	-0.904	-0.196	-0.768	1.34	0.196
0.433	0.251	-1.09	0.669	0.0107	0.401	0.575	0.213		0.938	-0.336	0.65	-0.835	0.746	-0.173
0.904	0.68	-1.08	0.13	0.149	0.8	1.01	0.106		-0.215	-0.769	0.814	-0.861	0.158	0.112
0.541	0.109	-0.582	-0.99	-0.117	1.04	1.11	0.00927		-0.854	-0.44	1.39	-0.839	-0.246	-0.0756
0.169	0.132	-0.963	-0.86	0.081	0.63	0.748	0.298		0.453	0.335	0.408	-0.836	-0.757	0.091
0.499	-0.192	-1.37	-1.45	0.231	0.178	0.686	1.1		-0.469	-0.216	0.269	-0.814	0.00844	-0.178
0.529	-0.393	-0.476	-1.57	-0.0871	0.234	0.882	0.649		2.85	-1.77	0.67	-0.877	-0.285	-0.592
0.105	-0.576	-0.236	-1.32	0.0473	0.618	0.47	-0.388		3.2	-0.000222	-0.231	-0.854	0.673	-0.618
-0.057	-0.555	-1.45	-0.438	0.33	0.648	0.0762	1.54		0.792	0.344	0.982	-1.02	-0.284	-0.818
0.858	-0.582	-0.855	-1.72	-0.0523	0.175	0.285	1.37		0.639	-0.863	1.32	-0.983	-0.641	-0.942
0.167	-0.571	-1.14	-1.46	-0.217	-0.0147	0.661	0.301		0.913	-0.37	0.516	-1.04	-0.127	-0.719
0.62	-0.808	-0.392	-1.03	-0.0318	0.34	0.564	0.581		0.0515	-0.0659	0.815	-0.983	-0.81	-0.719
0.551	-0.248	-0.845	-1	-0.364	0.366	0.365	0.752		1.12	-0.306	0.0143	-0.827	-0.184	-0.201
0.465	-0.295	-0.783	-0.0919	-0.636	-0.233	0.328	0.932		0.391	0.0596	0.29	-0.885	-0.719	-0.0419
0.0676	-0.0363	-0.967	-1.05	-0.135	-0.527	0.423	0.965		-0.296	0.0065	0.323	-0.865	0.119	-0.144
0.142	-0.476	-0.205	-0.111	0.275	-0.502	0.394	-1.31		0.954	0.55	-0.0384	-1.09	-0.87	0.175
0.979	-0.0787	-1.07	-0.389	-0.147	-0.61	0.169	0.584		1.62	-1.53	0.758	-0.919	0.169	0.251
0.797	-0.181	-0.287	-0.912	-0.596	-0.209	0.0687	0.635		-0.281	-0.79	0.631	-0.796	-0.392	0.486
0.876	-0.231	-0.46	-0.927	-0.614	-0.114	0.227	0.788		1.51	-0.245	0.424	-0.664	0.343	0.728
1.27	-0.0187	-1.33	-1.08	-0.455	-0.268	0.583	0.79		1.14	-0.0466	0.447	-0.708	-0.758	0.468
2.23	-0.982	-0.673	-1.23	-0.212	-0.18	0.522	0.123		1.11	0.0184	-0.256	-0.723	-0.617	0.599
1.77	-1.01	-0.166	-0.867	0.0436	-0.311	0.793	0.7		2.68	-1.09	-0.0878	-0.758	-0.561	0.0298
1.65	-0.892	-0.688	-0.145	-0.179	-0.736	0.802	-0.316		1.45	0.715	0.454	-0.645	0.0588	-0.117
1.59	-0.706	-0.694	-0.137	-0.539	-0.768	0.413	-0.688		0.587	-0.576	0.872	-0.668	-0.157	-0.612
1.48	-0.807	-0.447	-1.71	-0.215	-0.104	0.422	0.16		0.952	-1.62	0.553	-0.638	-0.593	0.228
1.15	-0.558	-0.489	-0.506	0.431	0.104	1.01	1.04		0.529	-0.731	-0.186	-0.846	-1.21	0.32
1.28	-0.171	-0.443	-1.37	0.313	-0.594	1.12	-0.00528		0.712	-1.79	-0.462	-0.763	-0.555	0.0136
1.28	-0.0131	-0.424	-1.35	-0.139	-0.784	0.826	-0.771		1.31	0.00109	0.669	-0.815	-0.155	0.963
1.24	0.0464	-0.182	-0.82	-0.26	-0.418	0.874	0.633		2.8	-0.0217	0.0386	-0.74	0.0844	1.38
1.44	0.768	-0.523	-0.652	-0.143	-0.483	0.707	-0.465		2.47	-1.25	0.789	-0.842	-0.443	1.12
1.86	1.5	-0.155	-1.06	0.0081	-0.682	0.366	-0.0998		0.403	0.299	-1.04	-1.05	-0.836	0.972
1.35	1.88	0.682	-0.294	-0.15	-0.498	0.265	-0.259		1.18	-0.218	-1.18	-0.84	-1.83	0.419
1.77	1.81	-0.904	0.0283	-0.397	-0.291	0.439	0.346		0.851	0.671	-0.919	-1.06	-0.2	1.17
1.77	1.77	-0.226	-0.813	0.127	-0.233	0.785	1.18		0.75	-0.593	-0.122	-0.995	-0.773	0.617
1.78	1.51	-0.0759	1.03	0.41	-0.613	0.744	-0.13		1.61	0.169	1.34	-0.949	-0.44	0.512
2.15	1.63	0.483	0.177	-0.51	-0.858	0.355	-1.01		2.2	-0.922	1.07	-0.983	-0.369	0.356
2.75	1.05	0.756	1.61	-0.648	-0.333	0.416	0.175		1.29	-1.63	-0.121	-1.02	-0.0581	0.581
1.7	1.11	0.578	0.804	0.258	0.0277	0.573	-1.14		-0.165	-0.413	0.839	-1.09	-0.0749	0.253
1.97	0.7	0.93	1.34	0.488	0.0657	0.773	-0.739		0.00386	0.241	0.66	-0.962	-0.832	0.314
1.52	0.627	0.827	0.927	0.206	0.165	0.899	2.33		-0.122	0.646	1.67	-0.871	0.157	0.159
1.62	0.455	0.129	0.797	0.114	0.377	0.956	0.543		1.31	0.62	1.17	-0.941	-0.468	-0.225
1.75	0.092	0.415	1.75	0.198	0.0825	1.23	-0.677		0.0227	0.731	1.38	-0.985	-0.259	-0.295
1.92	-0.115	0.747	0.987	-0.0682	-0.275	0.782	-1.23		0.6	0.434	1.51	-0.794	-0.957	0.0411
2.01	-0.0634	-0.646	0.57	-0.378	-0.381	0.241	0.699		0.641	-0.834	-0.0587	-0.935	-0.158	-0.141
1.58	0.00932	-0.27	1.39	-0.471	-0.417	0.665	1.02		1.41	-1.21	1.11	-0.959	-0.21	-0.192
1.87	0.389	0.562	1.53	-0.344	-0.204	0.908	-0.5		1.09	-0.565	1.07	-1.01	-0.744	0.0251
2.03	-0.148	0.226	1.39	0.223	0.0363	0.619	-0.615		0.0294	-0.057	0.669	-0.9	-0.708	-0.165
1.43	-0.204	0.0302	1.08	0.375	-0.183	0.591	-0.399		0.367	-0.717	1.53	-0.863	0.0931	-0.15
1.6	-0.206	0.0423	1.54	-0.02	-0.833	0.428	-0.677		2.78	-1.88	0.432	-0.768	0.311	-0.645
1.78	-0.184	0.0545	1.68	0.00403	-0.799	0.145	0.243		1.62	-1.19	0.43	-0.786	0.421	-0.84
1.29	-0.397	0.411	1.81	-0.22	-0.287	-0.00632	-1.04		2.06	-0.534	-0.0577	-0.834	0.65	-0.637
1.55	-0.36	0.524	1.75	-0.531	-0.026	0.031	-1.38		1.99	-0.628	-0.616	-0.909	-0.189	-0.634
0.875	-0.269	0.137	1.42	-0.371	-0.51	0.122	0.0455		1.73	-1.27	1.29	-1	-0.755	-0.386
1.64	0.153	-0.226	1.58	-0.469	-0.962	0.153	-0.297		2.11	-0.701	0.134	-0.908	-0.792	-0.969
1.64	-0.107	0.735	0.817	-1.02	-0.741	0.393	2.27		1.46	-0.587	0.588	-1.16	-1.26	-0.83
0.917	-0.0533	0.678	1.79	-1.31	-0.244	0.66	2.2		0.904	0.0961	-0.248	-1.03	-0.766	-1.16
1.53	-0.0264	-0.152	0.422	-1.41	-0.195	0.481	1.92		2.01	-0.0534	0.782	-0.956	0.049	-0.693
1.35	-0.096	0.32	0.421	-1.15	-0.755	0.299	1.97		0.272	0.114	0.932	-0.962	-0.469	-0.601
1.42	-0.174	0.461	1.18	-0.525	-1.15	0.757	0.276		0.221	-0.0994	0.813	-1.13	0.142	-0.751
1.18	-0.165	-0.0687	1.32	0.197	-0.932	1.09	0.173		0.872	-1.82	0.993	-1.17	-0.457	-0.726
1.03	-0.597	-0.155	1.99	0.396	-0.426	0.548	0.901		2.35	-1.13	0.857	-1.08	-1.49	-0.825
0.892	-0.664	0.173	1.09	0.199	-0.115	0.216	2.95		1.16	-1.03	0.96	-1.11	-0.956	-0.673
1.27	-0.61	-0.0483	0.471	-0.169	0.065	0.454	1.23		1.9	-1.4	1.63	-0.984	-0.959	-0.947
1.47	-0.719	0.0975	0.948	-0.273	-0.45	0.533	-0.933		1.23	-1.54	0.288	-1.06	2.14	-0.448
1.59	-0.905	0.526	-0.106	-0.303	-0.932	0.322	1.55		1.45	-1.08	0.327	-0.961	0.649	-1.17
1.82	-1.15	1.41	0.00255	-0.334	-0.628	0.426	0.901		2.02	-1.67	-0.168	-0.97	1.89	-0.987
1.32	-0.917	-0.136	-0.307	-0.11	-0.337	0.962	-0.0245		1.76	-0.592	0.144	-0.947	1.67	-0.621
1.65	-0.624	-0.581	-0.296	0.0293	-0.332	1.12	-0.0681		1.56	-1.25	0.265	-0.774	1	-1.29
0.803	-0.732	-0.091	0.559	0.0774	-0.276	0.635	0.895		1.33	-0.45	0.0812	-0.528	1.13	-1.15
0.958	-0.282	-0.0278	-0.016	0.213	-0.248	0.378	1.97		1.05	0.485	0.165	-0.895	1.45	-1.01
1.05	-0.111	0.609	0.66	0.466	-0.223	0.868	1.14		1.52	-0.376	0.9	-0.825	0.802	-0.696
1.24	-0.00882	1.43	0.152	0.828	0.164	1.29	-0.127		0.774	-0.756	0.281	-0.638	0.947	-0.263
1.34	-0.164	1.02	0.264	0.646	0.511	1.33	0.403		-0.0794	-0.146	0.198	-0.684	0.539	-0.611
1.29	-0.257	1.11	-0.891	0.396	0.102	1.45	-0.349		0.159	-1.09	0.477	-0.751	1.07	-0.703
0.536	0.00538	-0.136	0.304	0.694	-0.264	1.48	0.905		1.67	-0.31	0.587	-0.772	1.35	-0.401
1.28	-0.3	0.233	-0.569	0.766	0.276	1.79	-0.232		0.98	-0.0571	-0.5	-0.644	0.219	-0.709
0.996	-0.422	0.318	-0.83	0.509	0.48	2.69	-0.716		1.61	-0.633	1.78	-0.733	0.457	-0.643
0.974	0.00939	-0.703	-0.828	0.417	0.123	2.98	0.357		1.7	-1.69	0.763	-0.932	0.639	-0.0502
1.6	0.121	-0.094	-0.656	0.483	-0.0143	2.48	0.559		0.196	-1.69	1.18	-0.925	0.13	-0.268
1.04	0.271	-0.434	-0.188	-0.0173	0.159	2.36	0.361		0.433	-0.399	-0.264	-0.903	0.792	-0.025
2.09	0.0872	0.504	-0.562	-0.0924	0.21	2.69	0.301		0.195	-0.857	1.82	-0.777	0.232	0.0995
0.52	-0.124	-0.139	-0.597	0.42	0.33	2.73	-1.13		0.96	-0.862	1.21	-0.986	0.675	-0.406
1.24	-0.115	0.253	0.408	0.661	0.31	2.33	-0.19		-0.103	-0.77	1.31	-0.811	1.4	-0.257
0.914	-0.573	0.0692	0.072	-0.00251	0.0397	1.92	-0.706		0.112	-1.12	1.36	-0.746	0.136	-0.713
1.23	-0.149	-0.491	1.23	-0.489	-0.336	1.57	-0.242		0.297	-0.861	0.292	-0.754	0.166	-0.467
0.423	-0.155	0.699	1.46	0.161	-0.37	1.58	-0.472		1.49	-0.887	1.34	-1.02	0.19	-0.0761
1.26	-0.349	1.29	0.799	0.479	-0.185	1.67	0.746		0.0903	-1.67	0.854	-0.97	-0.482	0.0606
1.14	-0.171	1.59	0.215	-0.0278	-0.291	1.3	1.23		-0.653	-1.15	0.279	-0.943	-0.0781	0.0165
1.35	-0.0203	1.52	0.284	-0.389	-0.586	1.03	-1.37		-1.21	-1.97	-0.607	-1.06	0.51	0.0939
1.21	-0.175	1.02	0.498	0.481	-0.769	1.07	1.13		1.22	-1.24	0.922	-0.812	0.576	-0.372
0.773	-0.214	0.513	-0.408	1.83	-0.593	0.786	-0.308		0.0531	-1.37	-0.163	-0.825	1.67	-0.087
1.58	-0.189	-0.211	-0.182	2.35	-0.571	1.18	0.575		0.876	-1.04	-0.4	-0.832	1.25	0.127
1.3	-0.586	0.632	-0.29	1.75	-0.661	1.51	0.383		0.802	-0.805	0.372	-0.835	0.352	-0.0252
0.873	-0.788	0.587	0.363	0.955	-0.389	1.08	0.516		0.0518	-0.793	-0.436	-0.938	1.08	0.238
0.823	-0.579	1.57	-0.281	1.09	-0.574	1.02	0.73		0.278	-0.382	-0.742	-1.01	1	0.249
1.31	-0.816	1.35	-0.374	1.51	-0.817	1.51	1.11		0.866	0.68	-0.157	-0.877	0.492	0.069
0.778	-0.668	1.26	-0.354	1.22	-0.367	1.87	2.55		0.67	0.153	0.204	-0.786	0.759	0.212
0.699	-0.429	1.44	0.0411	0.814	-0.0686	1.78	0.118		1.55	-0.201	-0.54	-1	-0.0891	-0.0311
0.658	-0.094	1.2	-0.515	0.695	-0.0619	1.4	1.11		0.485	0.535	0.504	-0.871	0.723	-0.468
0.807	0.682	-0.603	0.19	0.813	-0.127	1.38	-0.319		-0.444	1.22	1	-0.758	1.53	-0.218
0.742	0.81	-0.214	-0.41	0.808	-0.409	1.35	1.48		0.383	-0.331	0.902	-0.896	1.42	-0.332
0.414	0.87	1.05	-0.089	0.613	-0.318	1.06	0.142		0.554	-0.356	-0.625	-0.884	1.32	-0.0457
0.879	0.979	1.16	0.23	0.183	-0.316	0.985	0.67		-0.929	0.604	1.57	-0.866	1.11	-0.53
0.589	1.12	1.31	0.32	-0.14	-0.647	0.488	-0.5		-1.11	-0.442	-0.421	-1.05	1.71	-0.682
0.906	0.82	1.07	0.58	-0.106	-0.501	0.347	0.81		-0.112	-0.663	1.59	-0.985	1.72	-0.443
0.578	0.448	-0.292	1.34	0.35	-0.418	0.693	1.49		0.308	-0.975	-0.598	-0.868	0.966	0.00687
1.56	0.403	-0.297	0.829	0.633	-0.522	0.714	0.553		0.652	-0.0254	0.0527	-0.782	1.08	-0.521
1.38	-0.0507	0.74	0.479	0.73	-0.602	0.523	1.14		-0.00887	-0.252	-0.322	-0.964	0.751	-0.684
1.1	0.235	0.227	0.916	0.604	-0.549	0.675	1.27		0.278	0.158	0.571	-0.935	0.517	-0.171
1.47	-0.0753	0.048	0.141	0.0528	-0.512	1.03	1.81		0.578	-1.72	-0.0395	-0.927	1.24	-0.465
1.25	-0.204	0.601	0.613	-0.0302	-0.503	0.913	0.186		-0.224	-1.5	1.25	-0.854	1.79	-0.67
1.54	0.167	-0.0934	0.735	-0.152	-0.286	0.738	0.341		0.257	-1.47	-0.838	-0.943	0.376	-0.397
0.942	0.1	0.231	1.08	-0.474	-0.327	1.01	1.18		0.17	-1.36	-1.21	-0.973	1.56	-0.451
0.825	0.0213	-0.461	0.0123	-0.159	-0.509	1.01	0.204		1.43	-1.8	-0.806	-1.05	1.02	-0.205
1.22	0.669	-0.288	0.156	-0.076	-0.746	0.693	0.649		1.45	-0.666	-0.628	-1.03	0.691	0.0415
1.13	0.845	0.285	0.0467	-0.218	-0.526	0.271	1.29		0.0278	-0.23	1.4	-1.08	0.707	-0.388
1.32	0.582	-0.316	1.29	0.212	-0.105	0.255	-0.299		1.34	-0.587	1.68	-1.12	0.264	-0.397
0.959	0.323	-0.649	0.673	-0.146	-0.0329	0.713	0.719		0.411	-0.848	1.63	-1.03	1.16	-1.07
1.06	0.405	-0.456	1.3	-0.6	-0.597	0.808	0.654		-0.11	-0.235	0.73	-1.11	0.761	-0.782
0.66	0.669	-0.487	0.944	-0.351	-0.959	0.337	0.394		0.254	-0.0505	-0.149	-1.12	-0.505	-1.24
1.02	1.21	-0.126	0.207	0.211	-0.963	0.76	-0.0161		-0.264	0.446	-1.11	-0.985	-0.279	-0.698
0.749	1.16	0.334	0.661	0.313	-1.23	1.21	0.247		0.0107	-0.193	0.406	-1.09	-0.296	-0.699
0.285	1.27	0.0739	-0.109	-0.0948	-1.13	0.912	1.34		0.666	0.715	0.256	-1.29	-0.00257	-1.1
1.6	1.87	0.225	-0.278	-0.392	-0.737	0.628	0.124		-0.318	-0.542	0.53	-1.15	-0.385	-0.951
1.09	1.8	0.103	0.132	-0.359	-1	0.476	-0.309		-0.159	0.21	0.345	-0.997	0.393	-0.316
1.07	2.26	0.103	0.239	-0.453	-1.41	0.713	1.67		0.62	0.515	-0.697	-1.09	1.1	0.0306
1.11	2.74	0.101	0.292	-0.514	-0.587	0.896	-1.1		-0.523	-0.0663	0.0486	-1.05	0.952	-0.107
1.14	2.41	0.505	0.788	-0.023	0.192	0.803	-0.344		0.846	-0.9	0.197	-1.29	1.53	0.264
0.514	2.27	0.183	0.0509	0.184	-0.262	1.03	0.189		-1.67	-0.0858	-0.566	-0.966	3.92	0.55
1.17	1.74	0.379	0.0911	-0.289	-0.788	0.972	0.78		-0.0941	-0.714	1.19	-0.905	2.56	0.756
0.838	2.02	-0.503	0.318	-0.546	-0.836	0.339	0.0741		-1.14	-0.187	-0.000397	-0.829	2.02	0.325
1.04	1.49	0.0824	1.37	-0.4	-0.806	0.414	1.44		-0.167	-1.14	0.334	-0.957	1.46	1.28
1.6	1.23	-0.267	1.42	0.0859	-0.874	0.798	0.984		-0.0941	-1.3	0.655	-1.14	1.17	0.985
1.34	1.2	0.709	-0.315	0.198	-1.17	0.728	0.577		0.118	-1.46	-0.659	-1.14	1.64	0.784
1.76	0.759	0.563	0.149	-0.132	-1.08	0.478	0.519		1.14	-2.13	-0.5	-0.969	1.78	0.545
1.89	0.875	0.0958	-0.0604	-0.559	-0.818	0.616	0.309		2.25	-0.181	0.0201	-1.16	1.36	0.398
1.09	0.581	0.233	-0.561	-0.295	-0.792	0.711	-0.701		-0.0224	-0.197	-0.15	-1.12	2.96	0.859
1.43	0.769	0.502	0.0311	0.0882	-0.588	0.814	-0.768		-0.501	-1.64	0.549	-1.05	1.52	0.421
1.95	0.701	0.712	-0.542	-0.167	-0.384	0.684	1.27		-2.24	-0.337	0.633	-0.919	1.41	0.633
2.14	0.732	0.922	-0.983	-0.299	-0.499	0.221	0.822		-0.887	-0.408	0.737	-0.992	1.77	0.27
1.84	0.587	0.147	-1.12	-0.312	-0.823	0.378	-0.239		-0.596	-0.423	0.214	-1.11	1.38	-0.655
1.91	1.08	1.44	-1.39	-0.531	-0.711	0.753	-0.7		1.33	-1.52	0.302	-1.07	0.895	-0.307
1.7	0.75	0.144	-1.18	-0.63	-0.122	0.85	0.278		1.21	-0.511	0.147	-1.05	1.87	-0.211
1.5	0.903	1.23	-1.06	-0.383	-0.381	0.859	-1.13		-1.33	-0.0625	0.0273	-1	1.11	-0.0885
0.913	1.47	-0.394	-0.495	0.117	-0.603	0.941	0.0357		-1.96	-1.31	-1.19	-1.05	1.47	-0.557
1.64	1.25	0.76	-0.41	0.123	-0.198	0.728	0.0771		-0.16	-0.111	-0.531	-1	1.72	-0.519
1.12	0.749	0.016	-0.711	0.105	-0.179	0.492	0.786		-0.588	-0.9	-0.6	-0.979	0.0445	-0.456
1.44	0.5	0.684	-0.166	0.336	-0.365	0.535	-2.06		-1.62	-1.06	-1.25	-0.959	0.773	-0.179
1.13	0.409	0.526	-0.56	0.845	-0.532	0.738	-0.756		-0.192	-1.52	0.466	-1.03	0.508	-0.331
1.85	0.152	0.893	-0.359	1.53	-0.708	0.807	-1.12		0.35	-1.17	0.972	-0.919	1.6	-0.572
0.793	0.0946	0.39	0.0894	1.58	-0.894	0.682	0.865		0.871	-1.15	0.919	-1.1	1.86	-0.646
1.75	-0.0684	0.105	-0.877	0.409	-0.766	0.237	0.705		0.287	-1.14	0.441	-0.998	1.34	-0.178
1.38	0.883	0.141	0.318	0.368	-0.45	-0.3	0.222		0.373	-0.534	-0.318	-0.945	1.31	-0.0182
1.51	2.66	-0.151	-0.277	1.14	-0.378	-0.362	0.254		-1.39	-0.646	0.322	-0.965	0.836	-0.494
1.34	2.87	0.0904	0.12	0.801	-0.495	-0.218	-0.641		-1.57	-1.5	-0.0992	-0.952	0.871	-0.127
1.2	2.79	-0.201	0.354	0.501	-0.256	0.141	-0.325		0.259	-1.18	-0.136	-0.979	0.942	-0.435
1.37	2.49	0.0715	-0.384	0.407	-0.00966	0.24	-0.64		0.436	0.321	0.572	-1.15	0.634	-0.179
1.69	2.43	0.165	-0.485	0.145	-0.249	0.135	-0.833		-0.343	0.41	-0.121	-1.01	0.651	-0.329
1.45	1.86	-0.477	-0.101	-0.138	-0.388	0.553	-0.00626		0.262	-0.448	1.01	-1.08	1.46	-0.497
1.46	1.9	-0.553	0.127	0.104	-0.223	0.862	0.105		2.04	-0.51	-1.08	-0.881	1.92	-0.243
1.8	1.5	-0.878	-0.0939	1.11	0.0335	0.566	-1.5		0.217	-1.11	-0.0233	-0.923	0.366	-0.353
1.88	1.53	-0.0869	0.42	1.74	-0.0979	0.58	-0.563		-0.372	0.517	0.445	-0.916	1.06	-0.375
1.63	1.32	0.181	-0.786	1.51	-0.41	0.292	0.071		0.376	-1.01	1.19	-0.734	2.19	-0.369
1.39	1.34	0.18	0.183	1.05	-0.393	0.0309	-1.48		0.596	-0.893	0.631	-0.697	-0.109	0.0366
1.62	0.983	0.159	0.466	1.04	-0.072	0.341	0.286		0.278	-0.617	-0.284	-0.971	0.128	-0.285
1.47	1.14	0.25	0.902	1.55	-0.188	-0.164	1.4		0.34	0.114	-0.365	-0.9	0.824	-0.0877
1.54	1.47	0.11	-0.509	1.96	-0.541	-0.674	-0.186		-0.365	-0.124	-0.0812	-0.781	1.86	-0.215
1.75	1.34	-0.217	0.101	2.18	-0.207	-0.293	-0.963		2.21	-0.397	1.08	-0.887	1.43	-0.635
1.99	1.5	0.0117	0.194	1.99	0.189	0.0899	0.112		-0.724	-0.0181	1.19	-1.15	-0.266	-0.959
1.5	0.96	0.305	-0.855	1.73	-0.181	0.00366	0.941		1.32	1.56	0.43	-0.988	0.2	-0.286
2.14	0.923	0.886	-1.12	1.99	-0.639	-0.137	0.93		0.47	0.446	-0.657	-0.809	-0.136	-0.404
1.91	0.813	1.1	-0.328	1.87	-0.373	-0.125	-0.0635		0.241	-0.377	1.02	-1.01	0.403	-0.446
1.89	0.886	0.786	-0.0454	1.54	-0.259	-0.158	0.355		-0.00754	-0.518	0.528	-1.01	-0.0637	-0.18
1.55	1.22	0.414	-0.222	1.59	-0.427	-0.231	1.47		-0.413	-0.184	0.954	-1.05	0.113	-0.0563
2.31	1.43	0.841	-1	1.62	-0.536	-0.111	0.396		0.387	0.487	0.804	-0.981	-0.231	0.0299
1.6	1.16	1.15	-0.422	1.14	-0.743	-0.176	-0.121		0.37	0.543	0.182	-1.12	-0.421	-0.679
1.84	1.28	1.08	-1.31	0.803	-0.948	-0.592	0.586		0.75	0.667	1.45	-1.08	-0.0127	-0.21
2.02	1.17	1.29	-0.823	1.28	-1.08	-0.553	2.51		0.17	-0.322	0.771	-1.09	-0.68	-0.822
1.84	0.827	0.743	-0.64	1.65	-0.898	0.0822	-1.2		0.336	0.915	0.301	-1.1	0.0123	-0.41
1.37	0.662	1.02	-1.02	1.21	0.0122	0.363	-0.293		0.325	0.235	0.264	-1.13	-0.574	-0.264
1.87	0.624	0.521	-1.21	0.79	0.245	-0.0315	0.891		0.026	-0.129	1.61	-1.04	-0.335	0.0446
1.65	0.305	0.569	-0.777	0.809	-0.628	-0.248	0.00834		0.321	-0.468	0.364	-0.86	0.0619	0.742
1.42	0.205	0.466	-0.268	1.01	-0.717	-0.218	1.11		0.599	0.425	0.0188	-0.944	-1.54	-0.0703
1.14	0.19	-0.254	-0.831	0.713	-0.0722	-0.0145	-0.376		0.716	-0.446	0.753	-0.973	-1.3	0.492
1.94	-0.0272	0.197	-0.866	0.426	-0.138	0.317	1		-0.108	-1.03	1.42	-0.891	-0.145	0.727
1.57	-0.0789	0.547	-0.932	0.496	-0.411	0.296	-0.972		-0.214	-0.504	1.59	-0.971	-0.93	0.902
1.82	-0.336	0.73	-1.27	0.65	-0.173	-0.372	-1.05		-0.208	-0.446	1.82	-0.913	-0.351	0.644
1.51	-0.326	0.827	-1.17	0.828	-0.359	-0.478	0.0308		-0.216	0.0345	1.05	-0.797	-0.604	0.339
1.91	-0.575	0.729	0.239	0.871	-0.582	-0.125	-0.32		-0.511	-0.367	1.58	-0.874	-1.24	0.55
2.15	-0.0911	0.478	0.985	0.353	-0.142	-0.141	1.3		0.306	0.464	0.937	-0.899	-0.602	0.72
1.68	-0.142	1.49	0.381	0.0447	0.0428	-0.499	0.575		0.851	1.39	1.23	-0.731	-0.586	0.136
2.12	-0.217	0.731	0.82	-0.00953	-0.415	-0.582	1.48		1.76	1.63	0.901	-0.851	-1.15	0.237
2.12	-0.192	0.277	0.249	-0.0354	-0.376	-0.403	-1.26		1.22	1.19	0.456	-0.862	-0.748	0.511
1.53	0.215	0.315	0.705	0.157	0.263	-0.187	1.98		1.71	1.6	0.58	-0.86	0.59	0.49
2	-0.676	-0.997	0.684	0.242	0.0996	-0.171	1.17		0.875	0.151	1.42	-0.827	-0.754	0.643
2.19	-0.581	-0.532	0.79	0.0579	-0.308	-0.349	-0.12		0.612	0.937	0.44	-0.814	-1.31	0.378
2.02	-0.38	-0.579	0.0153	-0.174	-0.0888	0.131	2.09		-0.248	0.909	-1.15	-0.785	-1.01	-0.237
2.03	-0.549	-0.978	-0.139	0.000774	0.0996	0.451	0.809		0.75	-0.325	-0.446	-0.906	0.0561	0.0746
1.94	-0.789	0.108	-0.211	0.532	-0.113	0.211	0.556		1.09	0.0542	-0.9	-0.708	-0.275	-0.0236
1.58	-0.344	0.237	-0.739	0.791	-0.178	0.132	0.716		0.0362	-0.0686	0.106	-0.842	0.254	-0.164
1.32	-0.114	-0.186	-1.68	0.278	-0.0455	0.408	1.98		0.738	1	0.652	-1.01	1.05	-0.515
1.01	-0.27	-0.202	-0.556	-0.136	0.195	0.0853	0.195		0.388	0.538	1.19	-0.853	1.42	-0.356
1.71	-0.0198	0.713	0.0239	0.198	0.866	-0.285	-0.135		0.976	-0.793	0.365	-1.01	-1.01	-0.669
1.88	0.181	0.563	-0.237	0.971	1.75	-0.307	0.426		1.04	-0.126	0.626	-0.856	0.166	-0.569
1.64	0.0705	0.32	-0.0785	1.52	1.84	-0.0408	0.194		0.175	-0.169	-0.208	-0.636	0.976	-0.6
1.49	-0.144	-0.825	0.077	1.47	1.37	0.151	0.461		-0.119	0.351	-0.347	-0.783	-0.349	-0.424
1.82	-0.203	-0.338	0.00982	1.03	1.46	0.196	0.338		-1.07	1.69	0.00594	-0.95	-0.241	-0.448
1.94	0.39	-0.291	0.0675	1.38	1.54	0.237	0.373		0.0447	0.473	1.15	-0.599	0.0927	-0.701
2.35	0.152	-0.509	-0.503	2.21	0.765	0.0297	2.14		-0.921	1.29	0.759	-0.857	1.73	0.0563
1.69	0.399	-0.918	0.926	2.49	0.546	-0.378	1.01		-0.205	1.03	1.01	-0.768	0.312	-0.181
1.97	0.165	-0.126	0.835	1.39	1.39	-0.424	0.153		0.162	0.742	0.886	-0.671	0.711	0.625
2.09	0.128	0.537	-0.131	0.846	1.91	0.0775	-0.646		-0.616	0.0477	0.376	-0.752	-0.559	0.874
1.41	0.262	-0.627	-0.186	1.08	1.54	0.111	0.143		-0.95	0.00696	1.04	-0.904	-0.873	0.297
2.04	0.585	-0.842	-0.202	0.978	1.31	-0.314	0.854		0.352	0.754	-0.294	-0.928	-0.000975	0.805
1.24	0.37	0.646	0.204	1.14	1.11	-0.571	0.569		-0.189	0.0235	-0.171	-0.779	0.353	0.499
2.05	0.605	-1.09	-0.49	1.65	0.565	-0.361	0.311		-0.979	0.348	0.545	-0.973	-1.19	0.617
1.78	0.73	-0.667	-0.555	1.13	0.442	-0.207	-1.2		1.65	0.187	0.447	-0.835	-0.771	0.218
1.41	0.875	-0.661	0.143	0.238	0.806	-0.0299	-0.103		0.375	0.473	0.724	-0.872	-1.04	0.212
2.08	0.46	0.701	0.525	0.361	0.733	-0.237	1.4		0.902	0.0122	0.464	-0.874	-0.818	0.485
2.02	0.35	0.0621	0.104	0.7	0.274	-0.265	0.0749		0.363	1.23	0.344	-0.68	-1.45	-0.194
1.53	0.322	-0.562	-0.0242	0.604	0.36	0.197	-0.494		1.35	-0.277	-0.695	-0.829	-1.14	-0.568
1.62	-0.282	-0.25	0.602	0.715	0.691	0.279	0.274		0.374	0.715	-0.118	-0.973	-0.919	-0.748
1.65	-0.00556	-0.401	0.584	0.661	0.493	-0.0283	1.43		1.56	0.0842	-0.211	-0.809	0.371	-0.737
1.61	-0.327	-0.296	1.11	0.412	0.197	0.316	1.17		-0.301	-0.163	0.659	-0.533	0.12	-0.284
1.77	0.311	-1.2	0.0847	0.703	0.07	0.738	0.222		1.82	-0.0712	0.553	-0.62	-0.421	-0.301
2.08	0.121	-1.01	1.1	0.553	0.067	0.574	0.546		1.53	-0.141	0.738	-0.808	0.0564	-0.11
1.35	0.74	-0.186	1.36	0.0838	0.248	0.333	0.598		0.961	0.51	0.852	-0.711	-0.139	-0.586
1.78	0.367	0.269	1.43	0.133	0.67	0.455	-1.16		0.905	-0.0185	0.597	-0.72	0.747	-0.728
1.85	0.323	0.277	1.21	0.558	0.974	0.707	-0.648		0.243	-0.446	0.826	-0.83	-0.0645	-0.556
1.71	0.364	0.316	1.36	0.126	0.863	0.605	-0.0138		0.309	-0.424	1.31	-0.713	0.176	-0.647
2.13	0.19	0.97	1.3	-0.679	0.503	0.044	0.952		0.134	0.803	1.09	-0.825	0.273	-0.292
1.94	-0.107	0.962	1.3	-0.472	0.213	0.338	0.697		1.81	0.0868	1.38	-0.904	0.335	-0.786
1.7	0.196	0.604	1.06	0.505	0.639	0.88	1.11		0.264	1.06	0.418	-0.999	0.0602	-0.455
1.43	0.107	0.495	1.04	0.653	0.995	0.426	-0.718		2.54	0.922	0.64	-0.908	0.0391	-0.9
2.14	0.423	0.156	0.46	-0.226	0.567	0.0245	0.608		1.25	1.28	1.03	-0.744	-1.13	-1.07
1.67	0.262	0.309	0.366	-0.383	0.348	0.222	-0.114		0.617	0.565	-0.3	-0.747	-1.1	-1.46
2.19	0.396	1.21	0.118	0.258	0.728	0.353	-0.943		1.44	-0.0659	1.36	-1.02	-0.853	-0.774
1.27	0.213	0.106	-0.234	0.654	1.08	0.336	0.0901		1.07	0.505	0.442	-1.24	0.403	-0.726
2.14	0.109	0.236	-0.561	0.71	1.29	0.133	-1.53		-0.00161	0.00782	1.48	-1.2	-0.415	-0.8
1.56	0.00906	1	0.438	0.484	1.08	0.026	-0.42		0.6	0.473	1.26	-1.02	0.19	-1.15
1.45	0.144	-0.099	0.204	-0.145	0.984	0.283	1.13		2.45	-0.813	1.66	-1.1	0.949	-1.24
1.11	-0.212	-0.419	0.18	-0.767	0.861	0.484	0.798		-0.349	-0.147	2.15	-0.939	1.13	-1.21
1.68	-0.285	0.243	1.01	-0.373	0.572	0.414	-0.344		-0.986	-0.539	1.89	-1.19	-0.0412	-0.897
1.73	-0.338	-0.0211	0.522	0.288	0.802	0.189	0.302		0.228	0.186	2.06	-1.38	-0.613	-0.85
2.42	-0.253	0.232	0.527	0.378	1.39	-0.234	0.334		0.283	-0.696	0.255	-1.02	0.288	-1.08
1.57	-0.261	-0.562	-0.514	0.323	1.06	-0.0855	1.75		1.2	-0.895	0.346	-1.17	-0.175	-0.604
1.94	-0.0496	-0.000484	0.404	0.13	0.134	0.691	0.755		0.109	-0.498	0.139	-1.14	-0.0227	-1.18
2.13	0.388	0.514	-0.581	0.447	-0.0381	1.01	0.282		-1.7	0.233	-0.224	-0.898	0.262	-0.932
1.73	0.376	0.572	0.371	0.959	0.283	0.637	-1.53		0.94	-1.24	0.55	-0.815	-0.844	-0.809
1.55	0.154	0.419	0.113	0.907	0.139	0.276	-0.115		1.12	0.0868	1.11	-0.816	-0.876	-1.2
1.14	0.495	0.199	1.14	0.587	-0.0714	0.486	-0.492		0.189	0.146	0.386	-0.834	0.422	-0.711
1.34	-0.0944	0.488	0.833	0.376	0.12	0.96	0.195		0.22	-1.13	0.573	-1.05	-0.774	-0.888
1.69	-0.0786	-0.469	0.408	0.182	0.284	1.04	0.714		0.256	0.462	-0.192	-0.917	-0.246	-0.749
1.94	-0.012	-0.781	0.901	-0.00858	0.0605	0.882	-0.54		0.556	0.398	-0.0643	-0.9	0.51	-0.601
1.69	0.499	-0.342	0.134	-0.235	-0.301	1.37	1.42		-0.462	0.433	0.334	-0.829	0.00219	-0.675
2.18	0.0773	-0.0153	0.375	-0.0146	-0.68	1.62	1.36		1.56	1.06	1.01	-1.11	0.441	-0.86
2.23	-0.066	0.549	0.81	0.333	-0.624	1.25	1.48		0.62	0.192	1.71	-0.756	-0.971	-0.97
2.32	-0.155	-0.671	0.349	0.529	0.0888	0.983	0.372		0.196	0.222	1.15	-0.927	-0.655	-1.12
2.25	0.0516	0.52	0.939	0.652	0.556	1.23	1.16		1.14	0.554	0.0892	-0.815	-0.561	-0.887
2.28	0.276	-0.881	0.151	0.537	0.124	1.05	1.6		0.559	0.296	0.771	-0.779	-0.545	-0.858
1.94	-0.198	-0.797	0.361	0.236	-0.306	0.653	0.531		0.495	-0.638	0.158	-0.897	-0.661	-0.552
1.6	-0.115	-0.701	0.655	0.163	-0.117	0.625	0.472		1.93	-0.358	1.94	-1.03	-0.864	0.125
1.89	-0.0264	-0.62	-0.108	0.16	0.208	0.808	-0.55		-0.722	0.44	0.817	-0.776	-0.868	0.222
1.77	-0.217	-0.16	0.584	-0.201	0.165	0.895	-1.37		-0.858	0.935	0.912	-1.01	-1.07	0.134
1.62	-0.493	0.139	0.3	-0.396	-0.0211	0.692	-0.472		0.051	-0.122	-0.25	-1.11	-0.564	-0.718
1.76	-0.41	-0.585	1.17	-0.405	0.104	0.739	0.951		1.54	-0.0585	-1	-1.02	0.599	-0.488
1.68	-0.521	-1.02	1.74	-0.592	0.176	1.01	-1.04		0.644	-0.387	-1.22	-1.03	-1.03	-0.634
2.06	-0.428	-0.718	-0.904	-0.32	0.00845	0.933	0.0114		0.939	-2.04	-0.186	-0.723	-0.556	-0.416
1.42	-0.19	-0.918	-0.38	0.0285	-0.109	0.539	0.322		0.271	-1.15	1.25	-0.922	-0.0315	-0.764
1.87	-0.381	0.0817	0.0343	0.0906	0.0158	0.301	0.38		1.25	-1.82	-0.265	-0.874	-0.401	-0.861
1.66	-0.624	0.324	-0.395	-0.136	0.115	0.263	0.71		2.3	0.673	0.798	-0.902	-0.765	-0.86
1.87	-0.0981	-0.148	-0.627	-0.428	0.496	0.649	0.752		1.69	0.426	0.87	-0.934	0.669	-0.822
1.49	0.178	-0.352	-0.229	-0.644	0.196	0.751	0.956		0.814	0.272	1.42	-0.946	-0.731	-0.978
1.51	0.0335	-0.199	-0.921	-0.185	-0.49	0.496	0.923		-0.36	-0.399	-0.144	-0.872	-0.657	-0.632
1.3	-0.0996	-0.302	-0.104	0.767	-0.298	0.0806	2.12		0.487	-0.323	-1.45	-1.06	-0.0395	-0.203
1.72	-0.167	0.331	-0.391	0.683	0.291	-0.215	1.27		0.937	0.493	0.639	-1.07	0.539	-0.884
1.23	0.0109	0.854	-0.0617	0.0957	0.54	-0.0114	0.634		-0.0579	0.462	2.15	-0.994	0.351	-0.595
1.14	-0.245	1.62	0.311	0.713	0.324	0.33	-0.101		0.116	0.297	0.798	-0.734	-0.505	-0.506
1.05	-0.00955	0.664	-0.621	1.31	0.181	0.324	-0.506		-0.531	0.0851	0.788	-0.768	-0.195	-1.07
1.38	-0.192	0.74	-0.663	0.671	0.31	-0.414	-0.416		0.0977	-0.539	-0.581	-0.685	-0.486	-1.08
1.38	-0.188	1.04	-0.978	0.535	0.444	-0.487	1.56		1.27	0.855	0.481	-0.944	-0.061	-0.517
0.907	-0.463	1.44	-1.02	0.762	0.574	0.221	2.94		1.47	-0.452	0.162	-0.702	-0.207	-0.437
1.29	-0.385	1.64	-0.88	0.317	0.687	0.391	0.822		1.44	-0.165	0.313	-0.88	-0.285	-0.483
1.04	-0.15	1.12	-0.259	0.0426	0.624	-0.0148	0.709		1.08	0.0633	-0.63	-1.02	0.315	-0.746
1.1	-0.622	0.675	-0.833	0.3	0.143	-0.334	-0.412		0.303	-1.09	-0.299	-1.06	-0.448	-0.0688
0.86	-0.891	0.523	0.00315	0.65	0.127	-0.484	0.795		0.527	-0.905	0.484	-1.12	0.48	-0.69
0.435	-0.719	-0.285	-0.111	0.647	0.577	-0.285	1.45		-0.0572	-0.808	0.261	-1.26	-0.645	-0.441
0.475	-0.935	0.419	-1.6	0.118	0.274	-0.0419	0.377		-0.298	-1.23	-0.492	-1.18	0.316	-0.03
0.152	-0.645	-0.399	-1.44	-0.366	-0.233	-0.0376	-0.379		1.55	-0.121	0.0873	-1.01	0.479	-0.403
0.494	-0.653	-0.0667	-0.579	-0.383	-0.0853	-0.0506	1.38		0.265	0.271	-0.62	-0.88	0.321	-0.123
0.686	-0.568	-0.321	0.35	-0.135	0.369	-0.108	0.166		1.73	-0.95	-0.59	-0.859	-0.271	-0.431
-0.141	-0.864	0.36	0.172	0.0998	0.322	-0.231	2.03		0.51	-0.79	0.377	-0.999	-0.132	-0.128
-0.0132	-0.7	-0.729	0.495	0.0401	0.17	0.0606	1.2		0.195	0.234	0.184	-1.08	0.002	0.088
0.315	-0.865	-0.608	0.408	-0.23	-0.0243	0.434	-0.171		0.463	0.208	1.07	-1.09	-0.281	-0.459
0.417	-0.437	-0.852	-0.581	0.0116	-0.302	0.609	0.949		2.4	0.193	0.0473	-0.697	0.0572	-0.266
0.691	-0.666	-0.581	-0.932	0.729	-0.209	0.519	1.1		1.09	-0.551	0.767	-0.584	-0.25	-0.202
0.56	-0.624	0.337	-0.0496	0.89	0.0147	0.315	-0.461		-0.416	-0.844	0.707	-0.596	-0.899	0.279
0.928	-0.819	-0.0344	-0.539	0.335	0.0924	0.0352	-1.82		0.0416	-0.0281	0.507	-0.706	-0.78	0.896
0.053	-0.612	1.34	-1.17	0.0888	0.303	-0.0367	-0.962		1.52	0.132	0.0839	-0.892	-0.256	0.791
0.469	-0.504	-0.21	-0.826	0.199	0.398	0.326	0.0393		0.468	-0.901	0.0452	-0.91	-0.795	0.863
0.861	-0.3	0.257	-0.803	0.11	0.298	0.289	0.425		-0.653	-0.15	-0.898	-0.949	-0.926	0.838
0.00988	-0.00622	-0.326	-0.85	0.304	0.893	0.0905	1.45		0.131	0.662	-0.159	-1.05	-1.14	0.998
0.607	-0.335	0.616	-0.348	0.287	1.35	-0.202	1.14		0.936	0.175	-1.38	-1.14	-0.496	0.914
0.459	-0.325	0.406	-0.237	-0.0916	0.898	-0.406	1.84		0.285	1.46	-0.81	-1.11	-0.536	0.695
0.525	-0.0918	1.23	-0.364	-0.36	0.405	-0.0808	-0.381		1.05	-0.588	0.193	-1.03	-0.612	0.749
0.376	-0.442	0.842	-0.464	-0.0809	0.318	0.173	0.0551		1.56	0.104	-0.448	-1.06	-2.03	0.469
0.758	-0.24	1.24	-0.125	0.537	0.32	-0.144	-0.607		1.37	-0.109	1.07	-1.48	-0.67	0.374
0.654	-0.441	-0.389	-0.343	0.9	-0.176	-0.425	1.54		-0.047	-1.02	-0.355	-1.09	-0.51	0.422
0.83	-0.564	0.252	-0.568	0.604	-0.514	-0.161	0.448		0.67	-0.441	0.273	-1.13	-1.02	0.584
0.553	-0.59	0.436	-0.963	1.14	-0.352	0.335	0.129		-0.363	-0.104	0.569	-0.724	-1.32	0.697
0.65	-0.705	0.694	-0.364	2.67	0.0198	0.831	0.0968		0.807	-0.0576	0.862	-0.894	0.314	0.294
0.554	-0.895	0.617	-1.08	3.02	0.575	0.531	1.53		-0.166	0.834	-0.0657	-0.896	-1.03	-0.00698
0.827	-0.37	0.377	-0.628	2.19	0.71	-0.00126	2.08		0.541	0.893	-0.495	-0.759	-0.901	-0.197
0.534	-0.439	0.539	-0.997	1.63	0.202	0.461	0.668		0.465	0.688	-0.642	-0.888	-1.19	-0.304
0.3	-0.252	0.44	-0.524	1.47	0.0708	1.03	0.925		0.858	1.04	-0.351	-0.926	-1.61	-0.453
0.228	-0.188	0.545	-0.188	1.5	0.517	0.146	0.902		0.612	0.586	-0.238	-0.824	-1.74	0.372
0.582	-0.0606	-0.389	-0.377	1.46	0.412	-0.495	2.55		1.71	0.414	0.166	-0.859	-1.66	0.215
0.43	0.0292	0.214	-1.77	1.28	0.114	0.463	0.456		0.721	-0.95	-0.952	-0.776	-0.844	-0.138
0.0646	-0.0291	0.665	-0.742	1.47	0.164	1.31	0.00378		1.28	-0.466	-0.864	-0.908	-0.939	-0.326
0.0736	-0.0408	0.378	-0.038	2.01	0.0101	0.897	1.65		0.594	0.464	-0.229	-0.658	-0.447	-0.355
0.373	-0.3	0.161	0.496	1.87	-0.177	-0.044	1.24		0.133	0.472	-1.04	-0.861	-1.06	-0.092
-0.15	-0.038	-0.216	0.413	0.93	-0.258	-0.679	-0.316		0.626	0.0392	-0.908	-0.7	-0.393	-0.482
0.648	-0.189	-0.314	0.0472	0.988	-0.373	-0.209	0.273		-0.57	1.25	-1.13	-0.686	-0.271	-0.52
0.627	-0.0439	-0.112	-0.638	1.7	-0.356	0.409	0.968		-0.835	0.714	-0.26	-0.676	-0.687	-0.583
1.02	0.151	0.421	1.3	1.78	0.0149	0.646	1.38		-0.792	-0.489	-0.926	-0.695	-0.454	-0.647
1.42	0.267	0.8	-0.0209	1.44	0.377	0.0839	-0.71		0.343	0.363	-0.642	-0.709	-0.592	0.549
0.902	-0.107	1.66	0.651	1.46	0.39	-0.639	1.41		0.641	1.14	-0.485	-0.814	-0.75	0.386
0.421	-0.353	0.216	-0.399	1.84	0.178	-0.252	0.936		0.385	-0.0525	-0.0966	-0.801	0.242	0.408
0.482	-0.445	0.431	0.0152	1.76	-0.192	0.176	1.14		0.842	-0.195	-0.632	-0.628	-0.177	0.21
0.722	-0.547	0.259	-0.29	0.971	-0.411	-0.453	-0.0357		1.56	0.506	-0.422	-0.728	-0.707	0.583
0.0606	-0.577	0.448	-1.5	1.09	-0.215	-0.352	-0.96		0.775	0.84	0.593	-0.782	-1.09	0.043
0.558	-0.0981	1.03	-0.937	1.68	-0.0776	0.157	0.576		2.38	1.09	0.415	-0.864	-0.342	0.592
1.26	-0.182	1.02	-0.377	1.61	-0.188	-0.432	-0.924		1.95	0.174	-0.621	-0.678	-0.469	-0.122
1.8	-0.113	0.69	0.492	1.34	-0.212	-0.895	0.005		2.24	-0.252	-0.941	-0.528	-1.84	0.272
1.64	0.274	0.219	0.873	1.51	-0.097	-0.512	-0.928		0.44	-0.307	1	-0.711	-0.837	-0.155
1.68	0.299	1.03	-0.622	1.45	-0.224	-0.0315	-0.869		0.000768	0.571	0.22	-0.498	-1.14	-0.349
1.99	0.423	1.36	-1.29	1.36	-0.258	-0.188	2.13		-0.0467	0.676	0.848	-0.563	0.293	-0.138
1.85	0.362	2.18	-0.737	1.8	-0.43	0.09	1.39		0.308	0.833	0.61	-0.656	-0.654	0.111
1.93	0.492	1.46	-0.356	1.98	-0.573	0.218	1.05		0.471	-0.118	0.156	-0.609	-0.552	-0.266
1.84	0.0852	1.82	-1.12	1.65	-0.132	-0.415	0.683		1.77	-0.307	0.925	-0.343	-1.13	-0.267
1.96	-0.324	1.15	0.0307	1.36	0.301	-0.581	-0.0711		0.182	0.579	0.0935	-0.353	-0.951	-0.464
2.33	-0.381	0.599	-0.65	1.43	0.138	-0.356	0.721		-0.678	0.135	-0.00718	-0.614	-0.964	-0.101
2.06	-0.408	1.13	-0.701	1.37	-0.185	-0.206	2.14		-0.841	0.268	0.257	-0.528	0.285	-0.447
2.03	0.0634	1.51	-0.124	1.35	-0.432	-0.315	0.256		-0.309	0.428	0.601	-0.671	-1.39	-1.06
1.62	-0.649	1.32	-1.03	1.32	-0.316	-0.339	-0.598		1.26	0.758	0.902	-0.726	-1.21	-0.84
1.16	-0.736	0.866	-1.24	1.39	0.141	0.209	0.526		1.46	0.572	1.06	-0.702	-0.54	-0.277
1.23	-0.532	1.25	-0.275	1.14	0.284	0.807	0.813		2.42	1.09	-0.157	-0.841	-1.05	-0.567
0.703	-0.497	1.55	-0.987	0.948	0.249	0.705	2.25		-0.00317	0.797	-0.308	-0.643	0.128	-0.421
0.924	-0.185	1.68	-0.862	1.04	0.255	0.183	1.09		0.722	0.442	0.0554	-0.473	-0.784	-0.477
0.763	-0.251	1.37	-0.352	1.3	0.123	0.0643	-0.99		0.374	0.839	0.488	-0.243	-1.01	-0.101
0.833	-0.283	-0.0827	0.463	1.32	0.534	0.184	0.0761		0.938	1.62	1.49	-0.408	-0.725	-0.193
0.531	-0.272	0.825	-0.209	0.785	0.868	-0.0294	-0.226		0.952	0.175	0.44	-0.192	-0.676	0.226
0.638	-0.0352	0.737	-0.0885	0.45	0.25	0.283	-0.0314		0.0697	0.335	0.898	-0.45	-1.52	0.0153
1.22	0.0683	1.21	-0.028	0.545	-0.276	0.64	0.483		1.48	0.935	-0.747	-0.44	-0.0108	-0.469
0.767	0.225	1.11	-1.06	1.12	-0.183	0.868	2.67		-0.336	1.05	-0.232	-0.242	-0.607	-0.516
0.549	0.121	0.517	0.229	0.802	0.261	0.803	1.31		0.154	1.78	-0.631	-0.235	-0.381	-0.251
0.391	-0.264	1.09	-0.0981	-0.0363	0.653	0.638	-1.07		0.0188	1	0.21	-0.517	0.566	-0.339
0.916	-0.286	0.318	-0.904	0.0848	0.263	0.419	0.271		0.458	0.416	0.159	-0.527	-0.885	-0.451
0.721	-0.123	0.284	-0.325	0.329	-0.421	0.0923	-1.67		-0.0335	1.46	0.179	-0.339	-0.94	-0.34
0.647	-0.0664	1.03	-0.204	0.176	-0.218	0.0245	-0.109		1.1	-0.158	-0.195	-0.462	-0.666	-1.02
0.341	0.0839	0.397	-0.6	0.284	0.462	0.0983	0.536		0.682	0.578	-0.643	-0.651	-1.07	-0.488
0.21	-0.157	0.357	0.823	0.368	0.702	-0.302	1.38		0.945	1.82	0.74	-0.575	-1.26	-0.549
0.526	-0.158	0.715	0.452	0.175	0.443	-0.698	-0.166		-0.0878	1.98	-0.677	-0.57	-1.16	-0.89
0.254	-0.269	-0.141	1.33	0.325	-0.0186	-0.629	-0.243		-0.925	0.279	0.311	-0.507	-0.0767	0.0195
0.436	-0.352	0.00379	0.397	0.71	0.167	-0.459	0.546		1.31	-0.0328	0.26	-0.502	-0.555	-0.332
0.346	-0.453	0.238	1.14	0.446	0.81	-0.282	1.39		-0.0863	-0.245	0.569	-0.472	-0.394	-0.645
1.2	-0.484	0.93	0.541	0.16	0.971	-0.122	1.21		0.227	0.755	0.199	-0.478	-1.45	0.344
0.388	-0.789	1.22	1.8	0.507	0.587	0.159	1.07		0.271	0.818	0.116	-0.468	-0.678	0.53
-0.0171	-0.952	1.65	1.07	1.49	0.297	0.187	-0.405		-0.311	0.27	0.761	-0.235	-1	0.144
0.251	-0.901	1.75	0.0455	1.55	0.571	-0.0216	1.02		2.08	1.98	0.114	-0.303	0.593	0.303
-0.0441	-1.11	2.47	0.17	0.803	1.07	-0.277	0.266		-1.07	0.477	-0.125	-0.0475	-0.67	0.844
1.24	-0.823	2.42	0.56	0.717	0.883	-0.29	1.96		0.45	0.0294	0.0378	-0.105	-0.378	1.05
0.892	-0.951	1.45	-0.629	0.717	0.332	-0.321	1.1		0.322	0.816	0.286	-0.284	-0.458	0.544
0.427	-1.05	1.43	0.174	0.191	0.693	-0.486	0.682		0.278	0.653	0.224	-0.364	-0.375	0.22
0.359	-0.837	2.34	0.424	0.844	1.37	-0.282	0.683		-0.397	0.341	-0.172	-0.0685	-0.785	0.655
0.757	-0.677	1.19	0.03	1.7	0.687	-0.0861	-1.27		1.3	0.116	-0.153	-0.296	-0.992	0.309
0.695	-0.7	2.05	0.817	1.46	0.35	-0.0317	0.888		-0.748	-0.0945	-0.227	-0.0239	0.738	0.228
1.01	-0.416	1.02	0.742	0.71	1.02	-0.141	-0.35		1.44	0.739	-0.668	-0.299	0.618	-0.203
0.51	-0.684	1.9	0.852	0.18	1.48	-0.0119	1.32		0.798	1.45	-2.46	-0.218	-0.612	-0.0395
0.7	-0.525	0.988	0.135	0.476	1.27	0.333	0.302		1.27	0.521	-0.223	-0.0781	-0.701	0.131
0.408	0.0721	1.7	0.167	1.11	0.705	0.433	1.99		1.63	-0.451	-0.0659	-0.131	0.499	-0.464
0.899	-0.358	0.766	-0.0608	1.65	0.565	0.488	0.953		0.352	1.27	0.714	-0.195	-0.268	-0.203
1.65	-0.202	0.839	-0.228	1.7	0.792	0.0609	0.325		-0.389	0.366	0.548	-0.27	0.387	-0.708
1.52	-0.253	1.17	-0.319	0.812	0.891	-0.483	0.306		-1.19	0.0526	-0.501	-0.205	-0.559	-0.422
1.49	-0.216	0.959	-0.936	0.414	1.04	-0.367	1.91		0.315	1.11	0.472	-0.36	-0.0576	-0.453
1.64	0.337	1.11	-0.0597	0.649	0.621	0.148	1.34		1.32	0.912	-0.0107	-0.19	0.695	-0.0718
1.68	0.932	1.67	0.0623	0.775	0.215	0.216	-0.123		-0.404	1.42	1.02	0.13	0.707	-0.329
0.428	0.891	1.41	0.0549	0.122	0.752	0.183	0.5		-1.4	0.287	-0.242	0.233	0.596	-0.677
0.991	0.692	1.28	0.298	-0.142	0.898	0.363	0.17		-0.231	-0.043	0.881	0.283	-1.12	-0.666
1.1	1.23	1.6	-0.444	0.454	0.55	0.141	1.13		0.923	1.13	3.35	0.26	-0.0646	-0.585
1.56	1.22	1.81	-0.167	0.827	0.68	-0.316	-0.658		1.27	0.124	2.13	0.377	-0.753	-0.818
1.14	1.5	1.11	0.23	0.494	0.915	-0.51	1.3		0.688	1.13	0.565	0.452	-0.426	-0.0923
1.46	1.49	0.471	0.459	0.505	0.653	-0.24	0.761		0.969	0.136	1.53	0.334	-0.494	-0.268
1.62	1.48	0.934	0.286	0.874	0.157	0.283	0.606		1.51	0.176	1.29	0.145	-0.314	0.185
1.85	1.5	1.06	0.0159	1.07	-0.197	0.752	0.579		1.27	0.79	1.65	0.191	0.0961	0.359
0.83	1.48	0.323	-0.391	1.21	-0.182	0.419	0.552		0.984	1.83	2.55	0.0959	0.557	0.2
0.699	1.52	1.5	-0.821	1.07	0.341	0.0658	0.53		2.23	1.9	1.25	-0.126	-1.01	0.15
0.624	1.21	0.936	0.171	0.792	0.785	0.478	1.37		0.786	0.043	0.916	-0.17	-0.396	0.209
1.01	1.4	1.08	-0.3	1.12	0.691	0.805	2.08		1.6	-0.122	1.63	-0.0973	0.833	0.606
0.946	1.29	1.62	0.0732	1.33	0.62	0.924	0.594		0.711	-0.274	1.5	-0.0343	-0.465	0.48
0.527	1.11	1.3	0.365	0.575	0.861	0.873	0.886		-0.238	0.719	0.038	-0.0199	-0.515	0.538
0.448	0.877	1.1	0.0144	0.201	0.592	0.579	1.83		1.5	0.312	0.546	0.176	-0.466	0.148
0.752	1.18	0.862	0.479	0.712	0.601	0.512	0.758		0.245	0.554	-0.0424	0.232	-0.391	-0.103
0.389	1.45	1.14	-0.429	0.946	0.975	0.759	1.08		0.103	2.13	0.466	0.109	-0.309	0.33
0.463	1.24	1.31	-0.417	0.723	1.22	0.787	0.303		-0.72	1.14	0.273	0.269	-0.259	-0.0535
1.25	1.45	1.48	-0.019	0.523	1.28	0.627	0.872		-0.835	1.25	0.814	0.283	-1.1	0.142
1.01	1.54	1.29	0.431	0.52	1.46	0.595	0.197		-1.77	0.278	0.304	0.118	0.296	0.0238
0.909	1.67	1.4	0.547	0.697	1.37	1.01	0.454		-0.142	1.21	0.223	0.332	0.748	-0.185
0.629	2.48	0.764	0.632	0.795	0.912	1.07	1.9		-0.454	1.91	1.23	0.202	0.236	-0.129
0.856	2.85	1.18	0.391	0.581	0.62	0.578	0.263		1.57	0.517	0.246	0.127	-0.284	0.0433
1.29	3.52	0.948	0.385	0.273	0.111	0.566	1.19		1.29	0.00739	0.82	0.0596	-0.81	0.171
1.25	4.21	0.88	0.0614	0.652	-0.163	0.855	-0.572		0.658	-0.113	0.674	0.0886	0.342	-0.233
0.699	4.68	1.06	-0.128	0.889	0.0123	0.891	1.92		-0.284	1.37	1.61	-0.0278	-0.0546	-0.16
1.42	4.67	1.19	0.214	0.62	0.112	0.907	0.122		0.386	1.05	0.728	-0.0532	-0.457	-0.45
0.988	4.75	1.03	0.51	0.583	0.214	0.693	0.0611		0.535	0.048	0.0711	0.031	-0.577	-0.257
0.552	4.64	1.21	1.05	1.05	0.623	0.443	0.177		0.918	-0.113	0.29	-0.0182	0.371	-0.0812
0.696	4.08	0.8	0.93	0.885	0.833	1	1.24		-0.0547	0.827	1.31	0.0469	0.472	-0.708
0.665	4.69	0.893	-0.267	0.449	0.951	1.21	1.79		-0.92	1.89	0.458	-0.0684	0.084	0.038
0.0442	4.03	0.549	0.511	0.732	1.07	1.05	2.57		1	1.81	1.58	0.0112	0.748	0.323
0.753	4.3	0.973	1.25	0.848	1.09	1.23	1.32		0.743	1.97	0.316	-0.249	0.128	0.107
1.74	3.88	0.863	1.02	0.422	1.03	0.75	3.18		0.0627	2.8	0.356	-0.0622	-0.34	-0.234
2.18	3.92	0.4	0.773	0.339	0.504	0.389	1.92		-1.31	1.51	0.859	0.107	-0.1	0.0272
1.96	3.66	0.826	0.394	0.563	0.477	0.8	2.37		0.976	1.6	-0.307	0.0369	0.0785	-0.0822
1.51	3.79	0.413	-0.144	0.219	0.867	0.993	2.63		2.78	0.868	0.168	0.044	0.773	-0.376
1.36	3.42	1.07	0.637	-0.103	0.82	0.568	1.62		-0.305	1.09	0.862	-0.144	0.24	-0.465
1.03	3.26	0.128	0.058	-0.368	0.859	0.0893	2.92		0.307	1.34	-0.172	-0.0388	-0.951	-0.232
2.26	2.87	0.333	-0.0149	-1.07	1.46	0.0695	1.16		-0.677	1.49	-0.55	-0.0824	-1.21	-0.718
2.01	3.03	-0.249	0.702	-0.829	1.4	0.438	1.16		0.381	1.12	0.584	-0.0427	-0.641	-0.38
1.37	3.32	0.155	-0.686	-0.201	0.852	0.846	0.2		0.402	1.18	-0.0915	-0.195	0.0409	-0.216
1.02	3.41	0.0223	-0.74	-0.326	0.577	0.758	0.909		1.23	1.54	0.113	-0.279	0.0147	-0.249
1.33	3.07	-0.416	-0.0148	-0.403	0.844	0.656	2.04		0.886	1.18	-0.032	-0.12	-0.927	0.0183
1.51	3.61	-0.826	-0.0687	-0.449	0.776	0.537	2.32		0.124	1.66	0.232	-0.0973	0.279	0.0305
1.34	3.73	-0.168	-0.895	-0.278	0.559	0.282	2.21		-0.544	2.47	0.983	0.0139	0.395	0.584
1.13	3.22	-0.453	-0.0843	-0.178	0.857	-0.0587	2		0.445	1.01	-0.668	0.0578	-1.16	0.595
1.64	2.92	0.146	-0.508	-0.517	1.39	0.0221	1.07		0.00936	1.56	0.682	-0.25	0.0281	0.787
1.81	2.79	-0.559	-0.395	-0.31	1.46	0.316	1.96		-0.861	0.991	0.929	-0.0946	0.0337	0.895
2.36	3.19	-0.291	-0.664	0.0496	1.26	0.266	1.71		0.00511	1.4	0.296	0.0352	0.84	1.04
2.04	3.53	-0.447	-0.661	-0.496	0.675	0.207	1.49		-0.433	0.727	0.855	-0.172	0.332	0.953
1.49	3.24	-0.329	-0.0406	-0.792	0.388	0.628	1.55		0.283	1.25	0.959	-0.0377	-0.759	0.627
1.59	3.12	-0.23	0.049	-0.176	0.773	0.49	2.4		-1.37	0.879	0.682	0.0895	-0.436	0.42
2.04	2.97	-1.03	-0.747	-0.0446	0.924	0.2	-0.0292		-0.715	0.915	0.553	0.0386	0.503	0.627
1.81	2.42	-0.584	0.283	-0.215	1.04	0.911	-0.575		-0.23	-0.331	0.833	-0.112	-0.663	1.09
1.39	2.46	-0.0815	0.0689	-0.0538	1.29	1.08	1.66		-0.586	1.89	0.121	-0.00341	1.18	0.96
0.744	2.68	-0.451	-0.209	0.304	1.74	0.604	0.545		0.0249	0.767	0.519	0.155	1.71	0.609
1.87	2.6	-0.0227	-0.396	0.176	1.65	0.343	0.643		-0.317	-0.826	-0.142	-0.129	2.89	0.575
1.07	3.42	-0.678	-0.126	-0.157	0.914	0.563	1.53		1.78	-0.697	0.175	-0.0404	1.06	0.684
1.19	3.72	-0.76	-0.91	0.186	0.966	1.08	-0.268		0.145	-0.429	0.3	-0.197	1.28	0.512
1.92	3.77	-1.38	-0.846	0.679	1.55	1.53	-1.01		0.182	0.0348	-0.11	0.0523	2	0.551
1.76	3.21	-0.754	-0.951	0.649	1.55	1.41	-0.118		-0.536	-0.645	1.85	0.239	1.06	0.786
1.46	3.39	-0.403	0.459	0.307	1.19	1.24	0.589		-0.887	0.157	0.258	0.0354	-0.524	0.906
1.3	3.12	-0.416	0.964	0.282	1.42	1.56	1.6		1.06	0.495	-0.358	0.0658	0.499	-0.104
1.7	3.18	-0.436	-0.378	0.434	1.87	1.93	3.18		-0.794	-0.716	0.184	0.0502	1.15	-0.0462
2.05	2.99	0.0277	0.0713	0.381	1.87	1.98	0.618		-1.48	-1.16	0.258	0.0856	-0.124	-0.0373
1.69	2.72	-0.148	-0.00387	0.656	1.29	1.62	1.63		-1.05	-0.339	1.31	-0.117	0.491	-0.05
1.58	3.17	-0.742	0.423	0.378	0.715	1.28	2.05		-0.19	-0.28	0.885	-0.0518	0.223	-0.675
2.16	3.03	-0.739	-0.249	-0.118	0.586	1.31	0.366		-0.468	-0.0306	0.784	0.308	0.867	-0.235
1.96	2.98	-0.879	-0.468	0.0783	0.73	1.42	1.15		-0.974	0.481	1	0.105	1.07	-0.0328
1.57	2.71	-0.573	-0.32	0.344	1.05	1.7	1.17		0.0458	-0.247	1.74	0.0264	1	-0.42
1.81	2.69	-0.937	1.23	0.398	1	1.8	0.302		-0.442	-0.427	0.72	0.0752	0.706	-0.0051
2.1	2.16	-0.34	0.0824	0.283	0.61	1.35	-0.197		0.813	-0.626	1.1	-0.164	-0.47	-0.155
1.11	2.01	-0.266	0.0458	0.135	0.607	1.08	0.16		1.21	0.3	1.02	-0.14	0.952	0.0303
1.81	1.8	0.135	-0.113	0.123	0.74	1.14	0.464		0.376	-0.0011	0.304	-0.1	-0.755	-0.159
1.76	1.71	-0.489	-0.0717	0.134	0.654	1.05	0.738		0.984	0.524	0.779	-0.0608	1.39	-0.139
1.07	1.86	-1.21	0.32	-0.0785	0.653	0.522	1.47		-0.705	-0.652	1.24	-0.174	0.499	-0.179
1.73	2.07	-0.928	-0.544	-0.414	0.592	0.551	0.286		-0.0733	0.349	0.762	0.211	1.46	-0.236
1.99	1.57	-0.327	-1.17	-0.277	0.768	0.959	1.31		0.917	0.845	0.898	-0.00611	0.32	-0.385
1.9	1.29	-0.801	-1.12	-0.0156	1.34	1.18	1.64		-0.0622	-0.221	0.804	0.0583	1.11	-0.321
1.96	1.16	0.356	0.92	0.0631	1.59	1.3	1.35		-0.719	0.335	1.41	-0.169	0.503	-0.819
1.9	0.896	0.373	-0.285	-0.252	1.14	1.35	1.14		0.454	-0.476	1.96	-0.217	0.198	-0.59
1.92	1.17	0.0477	0.167	-0.2	0.436	1.34	1.78		-0.441	0.866	-0.409	-0.308	0.791	-0.0202
1.3	0.907	-0.255	-1.25	0.102	0.669	0.921	0.2		0.09	0.0416	1.14	-0.238	1.14	-0.509
1.62	0.984	0.122	-0.608	-0.0451	1.26	0.832	1.17		0.29	-0.0529	1.29	-0.224	-0.285	-0.291
1.82	0.906	-0.0057	-1.03	-0.122	1.52	1.17	-0.133		0.576	-0.961	0.578	-0.345	-0.0887	-0.528
1.84	0.629	-0.8	-0.965	0.3	1.86	1.29	-0.0187		-0.936	-1.1	0.738	-0.163	0.61	-0.292
1.45	0.645	0.054	0.272	0.265	2.01	0.525	0.639		-1.19	-0.0865	0.0197	-0.0317	-0.315	-0.399
1.86	1.31	0.632	0.0471	-0.134	1.71	0.434	-0.489		-0.0617	-0.289	-0.728	0.158	0.708	-0.481
2.29	1.09	-0.573	-0.517	0.0092	1.81	0.917	0.688		-0.899	-0.748	1.04	0.181	-0.956	-0.729
1.81	0.905	0.085	0.0329	0.372	2.34	1.18	0.995		-0.547	-0.759	1.44	-0.106	-0.298	-0.462
2.12	1.1	0.804	-1.08	0.345	2.33	1.02	1.16		-0.344	-1.02	1.36	0.104	0.487	-0.908
1.47	1.23	0.455	-0.67	-0.164	2.05	0.809	-0.363		-0.268	0.714	-0.139	-0.125	-0.928	-0.358
1.96	0.934	0.397	-0.454	-0.573	2.24	0.602	0.357		1.33	-0.755	-0.2	0.0839	0.197	-0.355
1.52	0.154	0.529	-0.177	-0.0695	2.49	0.58	0.545		0.22	-0.39	1.01	0.165	-1.45	-0.241
2.12	0.627	0.943	-0.436	1.05	1.81	0.7	0.513		0.57	0.0791	1.15	0.109	0.0804	-0.912
1.85	0.702	0.897	0.501	1.02	1.23	0.683	-0.193		-0.0473	0.868	1.8	0.142	-0.154	-0.525
1.48	0.654	0.311	-0.7	0.0181	1.48	0.584	-0.797		0.327	0.968	0.406	0.329	-0.493	-0.868
1.56	0.563	-0.132	0.486	-0.369	1.84	0.473	0.174		0.65	0.538	0.255	0.216	-1.04	-0.476
1.37	0.494	0.0284	0.142	0.213	1.75	0.685	0.776		0.427	-0.162	0.203	0.323	-1.34	-0.471
1.45	0.662	0.541	-1.06	1.12	1.31	0.631	0.756		0.382	0.603	1.07	0.62	0.782	-0.691
1.97	0.227	0.0453	-0.496	1.7	1.34	0.229	0.897		-0.0547	0.491	0.726	0.436	0.553	-0.645
1.25	0.151	0.854	-0.68	1.83	1.57	0.519	0.588		-0.775	0.652	0.174	0.448	0.438	-0.412
1.61	0.114	0.309	-0.391	1.68	1.37	0.556	-0.0817		-1.26	0.707	1.64	0.438	-1.23	-0.72
1.22	0.0211	0.146	-0.248	1.57	1.16	0.058	1.43		-0.379	0.953	1.34	0.311	-1.01	-0.752
1.17	-0.00249	-0.351	-0.701	1.65	1.3	-0.168	-0.544		0.433	1.07	0.295	0.344	-0.862	-1.19
1.44	-0.12	-0.142	-0.206	1.71	0.933	0.0493	1.09		-1.42	0.14	-0.0394	0.304	-1.16	-0.53
0.729	-0.13	0.523	-0.519	1.56	0.292	0.576	1.06		0.00413	1.42	0.609	0.325	-0.139	-0.775
1.59	-0.263	-0.167	0.736	1.21	0.603	0.727	0.212		-0.608	1.86	0.163	0.294	0.0461	-0.629
1.44	-0.22	-0.051	0.703	0.72	0.632	0.102	-1.04		0.611	0.133	-0.014	0.631	-0.139	-0.372
1.31	-0.681	0.0852	-0.306	0.761	0.0942	0.0132	1.75		-0.951	0.37	1.34	0.453	-0.732	-0.581
1.18	-0.318	-0.399	-0.394	0.793	0.23	0.717	1.77		-0.435	-0.0298	1.24	0.393	-0.61	-0.679
1.76	-0.253	-0.116	-1.04	0.695	0.508	0.731	1.26		-0.583	-0.435	1.24	0.358	-0.238	-1.2
1.49	-0.062	0.825	-1.01	0.831	0.578	0.243	2.05		0.93	0.225	0.488	0.393	-0.697	-0.932
1.24	-0.0291	0.24	-1.23	0.744	0.369	0.35	0.825		-1.07	-0.318	0.147	0.325	-0.354	-0.818
1.26	0.123	0.102	-1.17	0.534	0.00332	0.71	-0.132		-0.0179	-0.238	0.936	0.0302	-0.862	-0.566
1.16	0.059	-0.348	-0.99	0.435	0.236	0.354	-0.781		-1.04	-0.632	0.258	0.225	-0.399	-0.817
1.58	0.103	-0.636	-1.68	0.33	0.653	0.132	-0.87		-1.27	-0.133	0.469	0.232	-0.705	-1.11
0.855	0.392	-0.0541	-1.33	0.393	0.799	0.102	0.595		-2.86	-0.157	0.276	0.116	-0.53	-0.788
1.39	0.904	0.0899	-0.942	0.524	0.789	0.0236	1.36		-1.18	-0.684	-0.0374	0.165	-0.7	-0.53
1.59	0.47	0.423	-0.241	0.546	0.783	0.0264	0.207		-0.391	-0.246	1.71	0.153	-0.0361	-1.07
1.99	0.0953	-0.235	0.711	0.0708	0.547	0.246	0.161		-1.97	0.0954	0.451	0.103	-0.826	-0.569
1.71	0.413	-0.419	-0.546	-0.793	0.277	0.595	-0.355		-0.461	0.5	0.951	0.239	-1.26	-0.616
1.68	0.286	-0.673	0.997	-0.609	0.291	0.716	-0.205		0.00485	0.759	1.53	0.11	-0.765	-0.644
1.75	0.0881	-0.522	0.382	0.455	0.526	0.0813	1.18		-0.14	0.186	-0.0885	-0.00676	-1.1	-0.835
1.33	0.254	0.149	-0.653	0.8	0.759	-0.467	1.23		-3.08	0.786	-0.447	0.126	-0.758	-0.872
1.64	0.193	-0.136	-0.178	0.436	0.797	0.0534	2.04		-1.33	0.211	0.743	0.176	-0.725	-0.545
1.84	-0.255	0.153	0.16	0.282	0.513	0.272	-0.218		-0.88	0.931	0.0557	0.256	-0.877	-0.449
1.73	-0.12	0.437	0.152	0.286	0.346	-0.142	0.644		-2.6	0.339	1.87	0.447	-0.597	-0.914
0.824	0.166	0.0925	-0.000127	0.118	0.0991	-0.125	0.712		-1.26	-0.205	1.05	0.357	0.119	-0.969
1.71	-0.0614	0.557	-0.427	-0.205	0.0898	0.0593	-0.806		-1.39	0.000123	1.67	0.023	-0.115	-1.35
1.34	-0.29	0.2	0.662	-0.363	0.336	-0.0285	1.06		-2.01	0.692	1.26	0.205	-0.222	-1.42
1.17	-0.231	-0.00169	0.641	0.371	0.494	-0.0519	2.5		-0.859	1.13	2.17	0.173	-0.4	-1.13
1.55	-0.282	0.761	0.878	1.03	0.203	0.175	1.71		-1.7	2.76	2.23	0.219	-1.32	-0.765
2.23	-0.0738	1.67	-0.917	0.726	0.278	0.387	1.47		-0.691	2.85	0.826	0.3	-0.485	-1.07
2.17	-0.0854	0.354	0.297	0.0721	0.656	0.406	-0.0365		-0.27	2.67	-0.558	0.711	-0.179	-1.33
1.78	-0.0652	0.275	-0.695	0.169	0.841	0.128	1.46		-0.949	2.57	0.166	0.767	0.814	-0.947
2.01	-0.335	-0.0265	-0.24	0.181	0.985	-0.0196	0.401		-1.91	3.96	1.08	0.673	-0.845	-1.11
1.91	-0.348	1.09	0.65	-0.244	0.602	0.259	0.699		-1.46	2.71	-0.207	0.681	-1.08	-1.39
1.42	-0.713	0.3	0.0134	-0.237	0.197	0.601	1.8		-0.672	2.58	0.0853	0.684	-1.41	-1.52
1.59	-0.74	0.474	-0.356	0.161	0.277	0.571	2.73		-0.928	2.24	-0.615	0.538	-0.0623	-1.3
2.05	-0.809	0.804	-0.325	0.237	0.334	0.48	-0.113		-1.32	2.8	1.42	0.641	-1.06	-1.46
1.43	-0.869	0.995	-0.436	-0.0705	0.548	0.27	-0.337		-1.68	2.4	0.167	0.444	-0.168	-1.3
1.75	-0.558	0.329	-0.35	0.0961	0.574	0.222	-0.163		-1.6	1.63	0.794	0.614	0.0316	-1.29
1.78	-0.804	0.514	-1.14	0.514	0.328	0.766	1.3		-0.643	0.734	1.16	0.435	-0.974	-1.07
1.8	-1.03	0.295	-0.742	0.889	0.0874	1.49	1.44		-1.84	1.35	2.39	0.247	-0.488	-0.783
2.63	-1.12	0.403	0.774	0.629	0.257	2.3	2.02		-1.28	1.18	2.14	0.324	-0.454	-1.45
1.64	-1.3	0.867	-0.459	-0.0497	0.366	2.72	0.47		-0.65	2.18	2.02	0.265	-0.075	-1.34
1.89	-1.18	0.456	0.299	-0.0393	0.233	2.77	0.687		-0.959	0.519	0.692	0.442	-1.02	-0.79
1.63	-1.3	-0.339	0.671	0.319	0.27	2.64	-0.925		2.27	0.225	0.765	0.371	0.379	-0.62
1.68	-1.16	-0.316	0.0539	0.936	0.579	2.7	0.27		1.87	0.637	0.565	0.315	-1.22	-0.47
1.89	-1.29	0.437	0.199	1.72	0.492	2.87	0.251		0.49	0.199	0.921	0.249	-1.22	-0.509
1.3	-1.31	0.808	-0.0198	1.14	-0.283	2.79	0.0423		0.901	0.846	1.6	0.338	-0.438	-0.439
1.68	-1.07	-0.103	-0.407	0.254	-0.658	2.84	0.778		1.99	-0.56	1.28	0.367	-0.574	-1.02
2.23	-1.09	-0.19	-0.947	0.498	-0.136	2.94	-0.109		0.351	0.00636	1.09	0.635	0.187	-1.05
1.04	-1.3	-0.0445	-0.705	0.908	0.148	2.9	-0.516		0.347	0.677	0.95	0.466	0.219	-0.922
1.77	-1.07	0.289	-0.155	0.759	-0.123	3.04	0.151		-1.29	1.25	0.362	0.44	0.0185	-0.197
1.56	-0.91	-0.706	-0.877	0.578	0.447	2.39	1.52		0.361	1.92	0.293	0.201	0.296	-0.8
1.43	-1	-0.512	-0.279	0.85	0.929	2.36	-0.849		-0.551	0.797	1.17	0.175	0.0889	-0.879
1.98	-0.728	-1.16	-0.452	1.29	0.67	2.85	1.02		1.34	0.834	0.729	0.241	-0.671	-0.878
1.88	-1.18	-0.777	-1.08	1.52	-0.19	2.65	0.932		1.14	2.05	0.92	0.166	-1.19	-0.488
1.57	-1.21	-0.613	0.229	1.63	-0.547	2.34	0.775		2.36	1.31	0.298	0.135	-0.81	-0.58
1.38	-1.25	0.502	0.229	1.77	0.0427	2.4	1.44		0.62	1.07	1.16	0.193	-0.755	-0.787
1.91	-1.09	-0.0544	0.593	1.68	0.758	2.1	0.52		2.08	0.717	2.1	0.33	-1.07	-1.19
2.21	-1.15	-0.44	0.908	1.57	0.808	1.32	-0.0194		0.857	0.245	2.55	0.304	-0.651	-1.24
1.58	-1.23	-0.097	0.0697	1.84	0.316	1.3	0.0978		0.957	0.318	1.81	0.162	-0.834	-1.23
1.74	-1.47	-0.948	-0.129	1.88	0.324	2.08	-1.05		-0.543	1.75	0.459	0.335	-0.325	-1.04
1.8	-1.28	-0.405	0.223	1.7	0.539	2.67	-1.07		-0.478	1.66	-0.0878	0.00896	-0.357	-1.01
1.73	-1.04	-0.179	-1.41	1.82	0.847	2.4	-0.408		0.692	0.0808	0.641	0.25	-0.851	-0.52
1.58	-1.27	-0.399	-0.237	1.99	1.53	2	2.06		-0.132	1.28	-0.208	0.335	-1.06	0.763
1.86	-1.42	-0.131	-0.662	1.96	2	1.81	0.946		0.217	0.0878	-0.337	0.0853	-0.285	0.132
1.57	-1.34	-0.19	-0.0844	1.79	1.9	1.81	-0.292		-1.16	0.33	0.598	0.194	-0.987	0.245
1.9	-1.73	0.141	-0.768	1.33	1.84	1.76	-0.0656		-1.17	0.791	-0.392	0.151	-1.12	0.165
1.77	-1.57	0.114	0.498	1.33	1.84	2.03	1.32		-2	1.29	1.04	0.17	-0.843	0.106
2.26	-1.79	-0.91	-0.35	1.9	1.51	2.23	-0.00652		-1.76	1.04	0.603	0.413	-1.31	0.253
1.79	-1.73	-0.294	-0.847	1.91	0.738	2.21	-0.047		-0.599	0.676	-0.374	0.351	-0.0545	0.212
2	-1.03	-0.0743	-1.21	1.17	0.437	2.07	-0.255		0.587	1.47	-0.17	0.307	-0.0433	0.695
1.77	-0.773	-0.857	-0.407	0.947	0.86	1.61	0.585		0.0598	1.28	-0.318	0.39	-0.0291	0.316
1.43	-0.774	-0.237	-0.409	1.74	1.2	1.09	-0.82		-1.08	1.27	-0.356	0.411	1.02	0.344
1.61	-0.596	-0.0645	-0.0131	2.2	1.12	1.3	1.22		-0.811	0.518	-0.165	0.503	1.66	-0.17
1.67	-1.05	0.0253	-1.26	1.4	0.735	1.66	-0.85		0.462	0.915	1.38	0.75	1.16	0.194
2.19	-0.925	-0.285	-0.0962	0.698	0.806	0.898	1.25		-1.64	1.74	0.0718	0.972	0.614	-0.504
2.46	-1.35	0.614	-0.744	1.11	1.12	0.336	-0.603		-1.39	1.09	-0.574	0.931	0.382	-0.00159
1.36	-1.39	-0.364	-0.841	1.52	0.919	0.751	-0.794		-1.75	1.36	-0.801	1.01	0.474	-0.3
2.3	-1.26	0.214	-1	1.13	1.14	1.11	1.04		-1.4	0.674	-0.0596	0.72	0.226	-0.614
2.03	-1.31	-0.0979	-1.51	0.428	1.73	1.11	1.25		-1.24	1.34	0.669	0.797	-0.91	0.0814
1.48	-1.13	0.184	-0.44	0.338	1.27	0.722	-0.333		-1.8	2.8	0.62	0.613	0.287	-0.262
1.61	-1.06	0.444	-1.29	0.88	0.426	0.581	0.358		-0.414	1.12	1.34	0.786	0.677	-0.138
1.35	-1.33	0.405	-1.87	1.54	0.368	0.884	-0.866		-0.95	1.55	1.48	0.969	0.842	-0.0102
1.85	-1.35	-0.355	-0.8	1.36	0.796	0.777	1.15		-0.808	1.51	-0.684	1.04	-0.151	-0.41
1.51	-1.24	1.06	-0.677	0.753	1.05	0.355	0.175		-1.06	-0.622	-1.24	1.16	0.304	-0.183
1.67	-1.52	1.14	-1.79	0.932	0.725	0.529	0.594		-1.28	0.672	-0.344	1.27	-1.27	-0.287
1.21	-1.56	-0.479	-2.44	1.05	0.259	0.87	1.64		-1.31	-0.309	-1.07	1.21	-0.234	-0.999
1.26	-1.66	0.124	-1.79	0.994	0.282	0.7	1.33		-0.0945	-0.0161	0.0478	1.39	-0.584	-0.173
1.2	-1.68	0.31	-1.05	1.42	0.455	0.831	-0.852		-1.11	-0.954	-0.381	1.36	-0.656	-0.0224
1.62	-1.56	0.821	-1.77	1.66	0.62	0.905	-0.499		-0.923	0.664	-0.431	1.42	-0.417	0.524
1.33	-0.81	0.479	-1.45	1.15	1.17	0.782	0.288		0.539	0.793	0.208	1.3	0.0495	0.985
1.39	-1.06	0.345	-1.86	1.17	1.34	1.04	-1.52		0.557	-0.0328	-0.778	1.13	0.238	1.49
1.79	-0.795	-0.355	-1.08	1.69	0.867	1.18	-1.04		0.203	0.874	-0.539	1.16	-1.03	1.54
1.59	-0.626	-0.156	0.184	1.79	0.494	0.899	-0.961		-0.94	0.00286	-0.801	1.05	-0.912	1.49
2.44	-0.751	-0.119	-0.208	1.51	0.706	0.461	-0.363		-0.166	0.844	-0.82	1.14	-0.883	1.39
1.72	-0.721	-0.239	-0.276	1.46	0.852	0.223	0.0152		-0.312	0.671	-0.651	1.09	-1.52	1.06
2.06	-0.766	-0.369	-0.791	1.38	0.526	0.041	-0.607		0.485	-0.24	-0.258	0.977	0.357	0.933
1.19	-0.601	-0.242	-1.04	2.23	0.615	-0.147	1.38		1.7	-0.194	0.69	0.932	1.57	1.35
1.54	-0.908	0.273	-0.925	3.57	0.562	-0.0143	-0.182		1.38	1.2	-0.586	1.17	0.0531	0.891
1.73	-0.54	0.0218	-1.06	3.47	0.102	0.152	0.692		-0.694	0.398	-1.97	0.936	0.604	1.14
1.8	-0.422	-0.919	-1.88	2.93	0.234	-0.0153	-0.518		0.0119	1.29	-2.29	0.959	0.121	0.774
1.74	-0.571	-0.9	-1.17	3.43	0.834	0.14	1.24		0.482	0.256	0.297	0.976	0.435	0.209
2.11	-0.49	-0.322	-1.59	4.01	0.91	0.657	-1.14		0.203	1.01	-1.3	0.934	-1.18	0.241
1.06	-0.548	-0.0975	-1.02	3.52	0.425	0.639	-0.426		1.15	0.724	-0.485	0.659	0.288	0.509
1.71	-0.519	-0.195	-0.722	3.07	0.196	0.294	-0.577		1.34	-0.256	-0.206	1.08	-0.351	0.162
1.88	-0.615	0.198	-0.624	3.02	0.495	0.0396	-0.792		1.55	-0.516	-0.579	0.888	-0.29	-0.154
1.59	-0.586	0.0159	-0.616	3.02	0.825	0.102	0.0436		0.0887	-0.151	0.852	1.2	-0.512	-0.146
1.66	-0.381	-0.039	-0.115	2.92	0.581	0.285	1.27		2	0.123	1.55	1.21	-0.18	0.00434
1.61	0.17	0.512	0.281	2.45	0.662	0.788	0.0828		0.666	0.28	-1.35	1.14	-1.04	-0.545
1.74	0.0608	-0.496	-0.0295	2.78	1	1.15	-0.932		0.815	-0.701	-0.0118	1	-0.363	-0.278
2.02	0.239	-0.143	-0.159	3.91	0.68	1.04	0.182		0.65	-0.368	0.453	1.15	0.58	-0.063
1.25	0.543	0.436	-0.931	3.62	0.747	0.818	0.742		-0.242	-0.638	1.07	1.16	0.321	-0.242
1.48	0.816	-1.24	-0.95	2.53	0.939	0.723	-0.193		0.928	0.0351	0.143	1	0.949	-0.397
1.69	0.604	-0.884	-0.592	2.84	0.968	0.663	-0.506		0.544	-0.65	0.218	1.29	0.0916	-0.272
1.53	0.527	-0.606	-1.04	3.54	1.07	0.861	1.16		0.468	-0.083	0.71	1.03	-0.621	-0.0982
0.637	0.608	-1.31	-0.469	3.38	0.712	1.25	0.871		0.902	-1.27	0.727	1.22	-0.229	-0.293
1.02	0.514	-0.957	-0.882	3.13	0.15	1.5	-0.302		1.72	-0.162	0.408	0.998	0.624	-0.58
1.34	0.209	-1.12	-0.633	3.04	0.197	1.16	1.28		1.29	-0.698	-0.141	1.03	-0.451	-0.373
1.1	0.591	-1.16	0.48	2.64	0.592	0.464	-0.583		1.3	-1.05	0.617	1	-0.297	0.57
1.34	0.547	-0.53	0.165	2.48	0.445	-0.0192	0.83		0.917	-1.3	-0.292	1.08	-0.583	0.0538
1.28	0.658	-0.949	-0.772	3.12	-0.163	0.027	-0.16		1.56	-0.322	0.544	1.14	0.392	0.141
1.15	0.708	-1.38	-0.421	3.57	0.162	0.644	0.337		0.224	-1.11	0.527	1.48	0.245	0.157
1.58	0.529	-1.52	-0.801	3.39	0.954	0.945	0.325		0.824	-1.63	-0.087	1.85	0.0803	0.271
1.65	0.426	-1.19	-0.672	2.81	1.08	0.578	1.08		1.32	-0.638	-0.597	1.56	0.33	0.00386
1.71	0.282	-1.75	-1.45	2.64	0.595	0.537	1.01		2.48	-0.0985	0.837	1.6	0.221	0.812
2.17	-0.0613	-1.43	-0.76	2.78	0.454	0.669	0.0251		2.57	0.847	0.514	1.62	0.0534	1.18
1.94	0.0363	-1.01	-1.52	2.6	0.638	0.388	1.05		3.33	-0.158	1.09	1.58	1.2	0.784
1.78	0.251	-1.71	-1.59	2.23	0.866	-0.169	0.229		1.74	0.155	0.16	1.52	-0.105	0.615
1.42	-0.0331	-1.4	-1.38	2.13	1.09	-0.0564	1.69		0.851	0.168	0.968	1.62	-1.6	0.31
2.18	-0.66	-1.4	-0.313	2.17	0.888	0.28	-0.172		1.55	1.4	0.677	1.39	-0.952	0.688
1.89	-0.668	-0.993	-0.61	2.1	0.605	0.489	0.712		0.812	1.07	0.371	1.58	-0.802	0.736
1.39	-0.513	-0.726	-0.246	1.7	0.642	0.00221	-0.0852		1.41	0.3	0.194	1.46	0.135	0.4
1.31	-0.587	-1.26	-0.0386	1.52	1.14	0.0836	1.7		0.822	-0.412	-0.0573	1.55	-0.326	0.186
2.11	-0.594	-0.941	0.682	1.44	1.44	0.919	0.818		0.0561	0.961	0.415	1.34	0.144	0.206
1.44	-0.607	-1.35	-0.273	1.12	1.02	0.687	0.541		0.841	-0.424	0.9	1.45	0.622	0.0563
0.848	-0.244	-1.73	0.185	1.04	0.523	0.465	-0.208		0.895	0.29	0.723	1.34	1.41	0.242
1.58	0.051	-1.83	-0.139	1.29	0.4	1.1	0.309		1.96	-0.236	0.72	1.32	1.41	0.588
1.66	0.0363	-1.19	-0.115	1.47	0.243	1.11	0.507		-0.327	-0.517	1.11	1.38	0.961	-0.00388
1.62	-0.11	-0.571	0.206	1.2	0.604	0.486	-0.168		-0.577	-0.836	0.698	1.22	1.15	0.0523
1.49	-0.0151	-2	-0.557	1.36	1.69	0.911	-0.77		0.25	-0.553	1.53	1.09	1.01	-0.208
1.61	-0.44	-1.84	-0.526	1.63	1.86	1.13	-0.216		-0.792	-0.704	1.03	1.27	0.467	0.167
1.48	-0.421	-0.821	0.771	1.31	0.803	0.229	0.565		1.01	-0.813	-0.493	1.08	-0.0554	-0.46
2.06	-0.204	-1.33	0.646	0.752	0.289	-0.185	-0.955		-0.197	-0.131	0.735	0.867	1.48	0.316
1.69	-0.357	-1.58	0.0366	0.507	0.644	0.142	-1.16		-0.108	-0.65	0.367	0.8	1.9	-0.0651
1.47	-0.582	-1.39	-0.164	0.873	0.934	0.504	1.04		-0.186	-1.14	1.49	0.886	-0.514	-0.0413
1.54	-0.61	0.04	0.0138	0.784	0.577	0.765	-0.695		-0.175	-1.16	2.01	0.793	-0.158	-0.828
0.976	-0.724	-1.11	0.486	0.416	0.603	0.862	0.52		-0.722	-0.653	1.95	0.976	0.403	-0.489
0.835	-0.821	-0.754	-0.285	0.43	0.97	0.792	0.124		0.802	0.715	1.01	0.965	0.808	-0.542
1.41	-0.98	-0.335	-0.41	0.622	0.79	1.22	1.13		0.97	0.147	1.28	1.07	0.477	-0.489
1.29	-0.912	-0.54	-0.258	0.886	0.633	1.19	0.527		0.131	0.744	0.538	1.51	-0.278	-0.796
0.856	-0.655	-0.607	-0.551	0.451	0.816	0.57	0.686		0.378	1.03	0.118	1.38	0.302	-0.0106
1.47	-0.585	-0.868	-0.479	0.135	0.89	0.439	1.02		-0.337	-0.105	0.274	1.27	-0.00526	0.392
1.16	-0.399	-1.4	-0.46	0.512	0.829	0.853	-0.553		-0.708	0.321	0.888	1.18	0.478	-0.291
1.66	-0.884	-0.915	-0.397	0.647	0.872	0.777	0.704		-0.423	0.764	1.17	1.21	1.87	-0.12
1.21	-1.07	-2.15	-0.233	0.698	0.83	0.301	1.08		-0.431	0.608	-0.375	1.07	0.358	0.384
1.76	-1.2	-1.73	1.14	0.526	0.969	0.291	0.28		-0.583	1.23	0.503	1.27	-0.0779	-0.252
1.42	-0.748	-1.35	0.983	-0.0368	0.974	0.516	0.0116		-0.423	1.27	0.443	1.35	-0.436	-0.000559
1.18	-0.918	-0.98	0.485	0.143	0.801	0.755	-0.347		0.964	1.55	1.25	1.55	1.27	-0.238
1.27	-1.13	-1.29	0.703	0.84	0.905	0.911	0.438		-0.0519	1.69	0.00592	1.51	-0.201	-0.324
1.59	-0.927	-1.22	0.251	0.863	0.87	0.761	2.2		-0.984	1.9	0.629	1.71	-0.304	-0.452
1.33	-0.788	-0.96	-0.0708	0.633	0.688	0.69	0.0966		0.0331	3.12	-2.09	1.52	-1.04	-0.117
1.18	-0.836	-0.444	0.527	0.404	0.596	1.02	-0.303		0.0818	1.55	-0.692	1.46	0.417	0.143
1.02	-0.537	-0.86	-0.66	0.0746	-0.0512	1.34	0.775		-0.591	1.49	-0.382	1.39	-0.464	0.135
1.23	-0.493	-1.65	0.0928	-0.272	-0.547	1.02	0.638		-0.651	0.985	-2.15	1.5	-0.0371	-0.0131
1.8	-0.673	-1.37	0.0155	-0.094	0.0116	0.846	0.107		0.168	1.93	-0.293	1.36	0.298	-0.149
1.81	-0.879	-0.866	0.346	0.331	0.678	0.894	0.122		1.67	1.45	0.647	1.37	0.469	0.829
1.42	-1.11	-1.66	0.479	0.384	0.919	0.517	0.785		1.31	1.91	-0.587	1.23	0.316	0.4
1.39	-0.708	-0.906	1.41	0.0714	0.987	0.674	1.33		-0.0852	2.09	-1.19	1.55	-0.155	0.982
1.49	-0.625	-0.854	0.989	-0.15	1.27	0.834	2.18		0.457	2.36	-1.31	1.4	0.831	0.94
1.64	-0.878	-0.772	0.387	-0.308	1.74	0.521	0.416		-1.06	2	-0.417	1.54	0.134	1.42
1.29	-0.596	-1.04	0.867	0.0581	2.08	0.427	1.2		0.449	1.15	-0.675	1.37	0.288	1.52
1.46	-0.6	-0.875	1.3	1.07	1.97	0.543	-1.47		-0.802	0.111	0.151	1.31	-0.513	1.53
1.26	-1.15	-1.34	0.15	1.11	2.02	0.646	-1.03		2.77	0.929	0.789	1.26	0.262	1.69
1.37	-1.2	-0.993	0.477	0.748	2.01	0.526	1.33		0.485	1.38	0.738	1.24	-0.0513	1.29
1.73	-1.03	-1.05	1.08	0.576	1.64	0.306	0.964		0.963	1.14	0.574	1.29	-0.56	1.13
1.48	-0.499	-0.201	1.36	0.651	1.23	0.19	2.02		0.365	0.768	-0.733	1.05	0.365	1.81
2.25	-0.705	-0.456	0.695	0.915	1.51	0.691	1.85		-0.814	1.19	-1.32	1.05	-0.0258	1.78
1.83	-0.895	-1.14	0.162	0.896	1.53	1.05	0.0386		0.773	0.465	1.29	1.55	-0.339	1.56
1.57	-1.42	-0.769	0.549	0.743	1.24	0.564	0.0506		-0.112	0.825	0.372	1.6	0.304	1.04
1.28	-1.32	-0.168	0.338	1.05	1.16	1.07	-0.241		-0.803	1.73	-0.154	1.67	0.0509	1.32
1.03	-1.28	-0.146	0.105	1.56	1.18	1.42	1.1		-1.12	0.888	-0.621	1.59	-0.103	0.588
1.04	-1.46	-0.175	0.31	1.39	1.64	0.59	2.55		-0.172	1.96	-0.236	1.58	0.0179	0.959
1.34	-1.62	0.199	1.59	0.877	2.01	0.504	1.37		1.48	0.394	0.281	1.79	-0.204	0.716
1.06	-1.16	1.16	1.61	0.785	2.25	1.35	0.486		0.113	1.27	-1.1	2.17	0.372	0.098
1.24	-0.57	0.495	1.49	0.908	2.9	1.31	-2.26		-0.392	0.786	0.281	2.17	0.219	-0.0513
1.72	-1.01	0.681	0.419	0.769	3.32	0.602	0.141		-0.763	-0.165	1.07	1.99	0.715	0.0523
1.57	-0.914	0.416	1.09	0.753	3.41	0.841	0.195		0.484	0.0754	0.79	1.81	0.648	0.172
1.81	-0.81	-0.476	0.677	1.13	3.29	1.17	-0.0482		-0.515	0.485	1.31	1.65	0.141	0.0988
1.07	-0.752	0.153	1.21	1.16	2.96	0.835	1.53		0.118	0.243	0.531	1.58	0.324	-0.462
1.17	-0.745	0.0413	-0.0258	0.494	2.82	0.246	-0.816		-0.253	-0.123	0.905	1.58	-0.431	0.328
0.756	0.00121	0.347	0.194	0.683	2.9	0.53	-0.246		0.59	0.347	-0.443	1.36	0.833	0.0423
1.03	-0.194	-0.347	-0.305	1.63	3.15	0.971	0.138		0.147	1.2	0.127	1.51	0.064	-0.296
0.472	0.0087	0.765	1.76	1.74	2.91	0.537	-0.52		1.12	1.6	0.319	1.4	-0.199	-0.379
0.919	0.298	0.398	0.923	1.31	2.04	0.288	1.01		0.0923	0.175	-0.0625	1.41	-0.00337	-0.127
0.472	-0.14	-0.42	1.43	1.24	2.17	0.572	-1.4		0.93	-0.418	0.814	1.29	-0.725	-0.585
0.797	-0.107	0.0338	1	1.35	2.91	0.691	-1.82		0.915	1.52	-0.638	1.23	-0.341	-0.532
0.936	0.0608	0.175	0.983	1.22	2.85	0.0449	0.872		0.442	0.743	0.213	1.14	-0.486	-0.44
0.975	0.148	-0.288	1.72	1.38	2.36	-0.754	-1.26		-0.0417	1.42	-0.395	0.935	-0.745	-0.634
0.947	0.526	-0.0117	0.587	1.54	2.19	-0.555	1.19		0.14	0.466	0.0915	1.09	-0.316	-0.512
0.885	0.309	-0.243	0.219	1.16	1.76	-0.0849	0.0748		0.112	0.212	-0.202	1.66	-0.608	-0.112
0.866	0.241	-0.301	0.463	0.911	1.19	0.0542	-0.0436		-0.21	0.73	-0.644	1.32	-0.118	-0.388
1.34	0.41	-0.858	1.29	1.58	1.15	-0.00891	-0.463		0.266	-0.247	0.744	1.01	0.0813	-0.349
0.945	0.287	-0.521	1.34	1.95	1.87	0.00363	-0.354		-0.13	1.76	-1.32	1.07	-1.91	-0.547
1.03	0.273	0.403	0.868	1.22	1.81	-0.176	0.104		-0.0389	0.302	0.883	0.916	-0.874	-0.23
0.802	0.758	-0.0734	0.57	0.593	1.08	-0.293	0.426		0.38	0.301	0.854	1.25	-0.916	-0.387
0.954	0.518	-0.263	0.578	0.649	1.18	-0.00275	-0.00633		-0.00391	-0.206	1.04	0.91	-0.597	-0.57
0.432	0.0536	-0.663	1.07	1.22	1.72	0.126	-0.202		-0.381	1.96	-0.831	0.728	0.149	0.244
0.695	-0.0546	-0.884	0.719	1.85	1.55	0.0512	-0.0822		1.51	0.998	0.54	1.01	-1.05	0.723
1.24	0.135	-0.148	1.22	1.47	1.03	-0.101	0.235		0.0621	0.719	0.0604	1.09	0.436	0.63
0.971	-0.117	-0.0396	0.825	1.12	0.71	-0.0993	-0.179		0.00203	0.982	0.503	0.976	-0.76	0.0848
1.35	-0.23	-0.062	0.497	1.75	0.429	0.282	0.0312		-0.406	1.36	0.356	1.01	-0.994	0.509
1.31	-0.355	0.292	0.842	2.14	0.123	0.442	-0.491		1.21	0.442	-0.544	0.904	0.234	0.38
0.184	-0.105	-0.0106	0.702	1.74	0.117	0.173	1.15		1.77	0.713	-0.81	1.13	-0.92	0.0792
0.22	0.14	0.457	1.28	1.51	0.527	0.628	1.04		1.23	0.639	-0.264	1.13	0.407	0.337
0.468	0.0918	-0.294	0.507	1.41	0.665	0.795	1.35		0.108	0.384	-0.817	1.28	-0.894	0.0187
0.285	0.329	0.298	0.299	1.29	-0.011	0.222	0.313		0.144	0.169	-0.915	1.17	-0.93	-0.0271
0.329	0.137	0.578	0.984	1.53	0.125	0.0777	0.789		-0.999	1.5	-1.27	1.59	-0.791	-0.662
0.899	-0.273	0.276	1.26	1.51	0.623	0.713	-0.99		0.279	1.32	1.67	1.9	-0.861	-0.426
0.49	-0.0286	0.691	1.68	1.46	0.282	0.404	-1.27		0.198	2.07	0.866	1.7	-1.49	0.151
0.302	-0.592	0.62	1.9	1.72	0.331	-0.436	-0.603		-2.3	0.701	1.03	1.68	-1.49	-0.194
-0.271	-0.137	0.741	2.55	1.99	0.752	-0.351	0.494		-0.66	1.15	0.863	1.5	-0.781	-0.0725
0.676	-0.234	0.284	1.84	2.1	0.581	0.426	-0.197		-0.253	0.743	-0.148	1.58	-0.366	-0.00968
0.488	-0.486	0.177	2.3	2.09	0.444	0.468	2.48		-0.53	0.773	-0.928	1.56	-1.3	-0.224
0.458	-0.376	0.496	2.74	1.75	0.444	0.0592	-0.775		0.556	-0.193	0.914	1.45	-0.654	-0.0642
0.233	-0.575	0.894	1.77	1.48	0.242	-0.0935	-0.568		0.968	0.407	-0.879	1.37	-1.25	-0.0457
0.356	-0.417	-0.105	2.14	1.64	0.264	0.164	0.408		0.713	0.0393	-0.782	1.58	-0.135	-0.169
0.276	-0.364	0.398	1.94	1.95	1.05	0.555	0.138		-0.603	0.421	-0.234	1.51	0.192	-0.286
0.479	-0.23	0.536	1.33	2.11	1	0.628	-0.178		0.301	-0.192	-0.0609	1.47	-0.688	-0.622
0.292	-0.162	0.414	2.09	2.47	0.376	0.495	-0.117		-0.334	-0.6	0.197	1.85	-0.0766	-0.439
0.0971	0.382	0.173	2.36	2.89	0.589	0.438	-0.15		-0.399	0.419	0.925	2.17	-1.12	-0.0493
-0.22	0.684	0.978	2.71	2.34	1.08	0.288	0.353		0.996	0.291	-0.111	2.04	-0.787	-0.408
-0.0821	0.875	1.17	1.31	1.54	0.593	-0.13	0.495		-0.379	-0.184	-0.499	2.03	-0.973	-0.303
0.414	0.482	1.79	1.12	2.08	0.0512	-0.198	-0.719		2.08	0.442	-0.485	1.47	0.202	0.0729
0.488	0.214	1.26	2.24	2.68	0.291	0.267	0.436		-0.267	1.09	0.0618	1.82	-0.265	-0.255
-0.376	-0.136	0.683	0.742	2.3	0.666	0.486	-0.201		-0.315	0.725	0.408	1.8	-0.461	0.00699
-0.211	-0.0704	0.97	1.1	1.69	0.774	0.231	-0.462		-1.09	0.655	1.56	1.61	0.0431	-0.236
0.27	-0.326	1.46	1.16	1.59	0.479	0.0167	-0.151		-0.623	1.08	0.816	1.62	-0.953	0.0886
-0.902	-0.0283	1.29	1.36	1.98	0.414	0.228	-0.361		-0.406	0.24	0.665	1.59	-0.681	-0.809
-0.398	-0.439	0.887	1.22	2.26	0.789	0.433	1.13		-1.6	0.269	-0.78	1.54	-0.706	-0.344
0.0577	0.0561	0.746	0.901	2.06	0.661	0.212	-1.17		-0.00894	-0.415	0.328	1.4	-0.083	0.132
0.154	-0.0347	1.2	0.651	2.14	0.421	-0.138	0.0366		1.05	0.168	-0.56	1.41	-0.281	-0.418
0.612	-0.132	2.22	1.31	2.41	0.277	-0.217	-0.61		0.051	0.795	0.412	1.06	-0.4	-0.267
1.06	-0.253	2.21	1.66	2.17	-0.0641	0.0605	0.0234		0.54	0.769	0.534	1.08	0.613	-0.212
0.574	-0.155	1.86	1.16	1.7	-0.222	0.0636	0.369		0.749	1.88	0.277	1.24	0.64	0.0885
0.704	-0.275	2.36	1.78	1.48	0.0104	-0.411	1.1		0.366	1.47	1.28	1.24	0.76	-0.15
0.882	-0.127	1.93	1.93	1.14	-0.11	-0.649	0.0874		0.509	1.19	0.505	1.23	0.964	-0.0908
1.09	-0.258	2.46	2.39	1.24	-0.523	-0.637	-0.305		0.709	0.851	0.149	1.38	-0.363	-0.33
1.4	-0.142	2.01	2.6	1.69	-0.351	-0.365	0.186		-1.34	1.13	0.126	1.62	-0.035	-0.202
0.136	-0.383	1.85	3.71	1.71	0.00171	0.287	0.257		-0.0398	0.911	1.84	1.72	0.734	-0.458
0.608	-0.134	2.18	2.91	1.23	-0.0226	0.521	1.22		-0.713	0.0775	2.47	1.48	0.0137	-0.157
0.112	-0.498	2.19	2.06	0.807	-0.12	0.102	-0.221		1.4	1.38	1.99	1.34	-0.183	-0.546
0.753	-0.536	2.23	2.22	1.21	-0.257	-0.36	0.402		0.683	0.444	0.151	1.33	-0.0212	-0.458
0.602	-0.453	2.18	1.9	1.55	-0.452	-0.597	-0.604		-0.232	0.509	2.02	1.51	1	-0.618
0.454	-0.885	2.2	3	1.11	-0.142	-0.527	0.647		-1.91	0.419	1.75	1.16	-0.542	-0.353
0.9	-0.787	1.37	2.12	0.637	-0.0073	-0.23	0.14		-1.32	-0.201	2.03	1.19	-0.0908	-0.0543
1.51	-0.565	1.14	2.43	0.635	-0.786	0.102	-0.623		-0.397	0.234	2.19	1.52	1.27	-0.644
1.27	-1.2	0.681	1.96	0.789	-1.21	0.391	-1.2		-1.36	1.11	1.09	1.97	0.837	-0.392
0.448	-0.703	2.26	1.79	0.329	-1.17	0.261	0.0858		0.181	1.46	2.86	2	0.0885	-0.0417
0.668	-0.542	2.15	3.06	0.181	-1.12	0.287	-0.23		-0.171	1.39	1.23	2.18	0.47	-0.271
0.232	-0.448	2.87	1.42	0.325	-0.638	0.483	-0.159		-1.65	0.288	1.01	2.51	1.17	-0.126
0.13	-0.44	2.68	3	0.136	-0.801	-0.0422	-0.667		-0.749	1.38	0.402	2.31	-0.088	-0.0894
0.572	-0.292	2.32	2.74	0.198	-1.23	-0.365	1.53		-1.14	1.31	0.695	2.39	0.415	-0.114
0.49	-0.51	2.36	2.33	0.228	-1.42	-0.222	1.27		-0.0507	-0.84	0.787	2.22	0.689	-0.603
0.439	-0.19	2.09	1.95	0.105	-1.03	-0.216	1.07		0.0807	-0.81	1.4	2.33	0.741	-0.776
0.0105	-0.665	1.3	2.97	0.37	-0.594	-0.297	0.598		-0.027	-1.02	-0.137	1.93	-0.234	-0.317
-0.444	-0.697	2.41	1.86	0.634	-0.752	-0.269	-0.103		0.749	-1.47	-0.286	2.24	1.48	-1.07
-0.728	-0.777	1.65	2.93	0.229	-0.956	-0.08	-0.859		0.273	-1.11	0.0106	2.05	-0.124	-0.639
-0.339	-0.633	2.55	2.1	0.369	-1.24	0.211	-0.14		0.377	-0.453	0.854	2.13	1.07	-0.791
-0.272	-1.03	2.68	2	0.325	-1.28	-0.00978	-0.451		0.38	0.655	0.107	1.98	0.141	-0.572
0.0173	-0.568	2.81	2.03	-0.169	-0.542	-0.339	-0.796		0.771	-0.542	0.93	2.01	0.411	-0.392
-0.447	-0.853	2.52	1.53	0.236	-0.235	-0.326	-0.91		-0.0947	0.521	1.62	2.23	0.822	-0.236
0.147	-0.828	3.44	2.11	0.529	-0.745	-0.252	-0.176		0.406	-0.797	-0.319	1.83	0.929	-0.604
-0.275	-0.762	2.13	1.82	0.114	-0.98	0.226	0.457		-0.47	-0.146	-0.687	1.95	0.652	-0.499
0.322	-0.97	2.33	2.48	0.116	-0.766	0.509	-0.282		0.588	-0.643	1.45	2.06	1.23	-0.645
0.329	-1.2	2.82	2.99	0.377	-0.582	0.113	0.000228		1.21	0.287	0.896	2.12	1.24	-0.492
0.689	-0.883	2.42	3.07	0.443	-0.517	0.0159	-0.876		0.349	-0.0211	0.522	2.23	0.293	-0.678
0.714	-0.538	2.45	1.73	-0.00916	-0.63	0.273	-0.0552		0.562	0.689	2.09	1.96	1.96	-0.798
1.28	-0.678	2.24	2.54	-0.438	-0.704	0.279	0.803		0.608	0.485	0.628	2.09	1.01	-0.776
0.803	-0.876	2.26	2	-0.234	-0.404	0.106	1.02		0.755	0.828	1.38	2.15	-0.483	-0.976
0.687	-0.928	2.09	2.18	0.225	-0.0733	0.128	-0.356		1.24	1.07	1.02	2.1	-0.736	-0.601
0.337	-1.17	2.52	2.74	0.657	0.405	0.138	0.799		1.36	3.15	0.81	2.08	0.869	-0.871
0.744	-1.09	1.87	3.2	0.191	0.774	0.114	-0.917		0.0852	3.23	-0.638	2.17	0.0573	-0.941
0.444	-0.693	2.08	2.83	-0.14	0.47	0.468	-1.12		0.518	3.25	0.409	2.05	-0.238	-0.796
1.46	-0.716	2.74	3.55	0.422	0.172	0.636	-0.407		1.92	3.68	-0.384	1.97	-1.15	-0.873
1.14	-0.564	2.8	3.22	0.678	0.0547	0.368	-0.294		2.41	4.8	-0.466	1.99	-0.0728	0.511
1.04	-0.912	2.47	3.32	0.282	0.294	0.0925	-0.0408		0.116	3.85	0.296	2.21	-0.657	0.29
0.736	-1.11	2.38	3.59	-0.0601	0.482	0.171	0.0363		0.362	3.2	-0.7	2.09	-0.0643	0.679
1.05	-1.18	2.03	2.88	0.104	0.7	0.0472	0.803		0.106	3.54	-0.364	2.05	0.198	0.528
0.773	-0.939	1.69	2.49	0.515	1.21	-0.299	0.365		-0.519	3.15	-0.309	2.17	0.0316	0.405
1.48	-0.733	2.17	2.7	0.534	1.47	-0.0379	0.143		0.0035	3.98	-0.467	2.04	-0.636	0.0953
1.39	-0.783	1.53	2.46	0.139	1.26	0.271	0.083		-0.492	2.71	0.552	2.17	0.332	-0.299
1.16	-1.09	0.96	2.59	-0.362	1.09	-0.0444	-0.0593		-0.64	3.44	0.143	1.99	0.201	0.0616
0.901	-1.14	2.31	1.95	-0.162	1.16	-0.0904	-0.0403		-1.67	3.5	-0.513	1.91	-1.16	-0.0138
0.162	-1.45	3.13	2.47	0.582	1.14	-0.0121	0.818		-2.05	4.94	1.01	1.84	-0.251	0.378
0.853	-1.41	2.6	2.65	0.357	0.511	0.189	0.0964		-0.923	3.66	0.105	1.78	-0.545	-0.316
0.642	-1.26	1.82	2.67	-0.402	0.262	0.487	-0.745		-1.54	4.25	0.646	1.28	0.848	0.393
[truncated: 25,467 more rows]
