# Supplementary material for: Metabolic sensing in AgRP neurons integrates homeostatic state with dopamine signalling in the striatum
Source: eLife journal article supplement (doi:10.7554/elife.72668), 2022-01-12
Supplement: fig1-figsupp2-data1 [file FigS2E.xlsx]

## Sheet: Sheet1
	Agrp Cre									Agrp Crat
baseline	-0.178655	-0.0198444	-0.0894827	-0.034691	-0.192224	-0.171945	-0.160068	-0.101564		-0.171051	-0.0982604	-0.147464	0.161475	-0.184172	-0.147607
ghrelin	1.57435	2.79221	1.28913	1.83551	1.30465	1.71584	1.15131	1.94495		1.60536	0.876657	2.49355	3.41663	0.769626	0.488452
