# Supplementary material for: Metabolic sensing in AgRP neurons integrates homeostatic state with dopamine signalling in the striatum
Source: eLife journal article supplement (doi:10.7554/elife.72668), 2022-01-12
Supplement: fig1-figsupp2-data1 [file FigS2G.xlsx]

## Sheet: Sheet1
	Agrp Cre									Agrp Crat
baseline	-0.118702	0.0777601	0.0902899	0.103333	-0.074611	-0.0346642	0.0532182	0.0181015		-0.023063	0.0539838	-0.0202907	0.0871031	0.064215	-0.105348
food access	0.526753	-1.36339	-2.57818	-2.37546	-1.35912	-1.23419	-1.18552	-1.8202		-1.0149	-3.19612	-0.799902	-0.649114	-2.15121	-2.12809
