# Supplementary material for: Metabolic sensing in AgRP neurons integrates homeostatic state with dopamine signalling in the striatum
Source: eLife journal article supplement (doi:10.7554/elife.72668), 2022-01-12
Supplement: fig1-figsupp2-data1 [file FigS2H.xlsx]

## Sheet: Sheet1
WT	KO
0.414	0.352
0.539	0.522
0.39	0.474
0.26	0.136
0.22	0.51
0.187	0.717
0.387
0.26
