# Supplementary material for: Metabolic sensing in AgRP neurons integrates homeostatic state with dopamine signalling in the striatum
Source: eLife journal article supplement (doi:10.7554/elife.72668), 2022-01-12
Supplement: fig2-data1 [file Fig2D.xlsx]

## Sheet: Sheet1
NFO						CHOW						PB
0.92	0.849	-1.38	-1.74	0.635		1.26	0.182	0.315	-1.91	-0.645		2.51	1.52	-0.361	1.1	-0.888
-0.107	-0.19	-1.71	-1.11	1.89		1.49	-0.124	0.117	2.09	-0.134		2.51	2.42	-1.18	1.73	-0.401
0.0314	-0.342	-0.745	1.12	-0.624		1.22	0.682	0.777	-1.47	0.462		2.61	1.04	-0.431	1	1.13
0.868	0.569	-0.67	-0.132	0.57		1.31	0.421	0.591	0.923	-0.853		2.29	0.83	0.145	-0.668	1.05
1.19	-0.0506	-0.208	-0.835	-0.336		1.41	0.156	0.348	-0.688	-0.421		1.71	1.15	0.505	0.357	0.666
2.21	1.4	0.0429	1.47	-0.112		2.1	1.41	0.795	-0.401	-0.455		1.79	0.43	0.649	0.185	1.62
1.74	-1.17	-1	-0.15	0.0891		2.07	0.987	-0.134	-0.421	-2.7		1.19	0.564	0.372	0.0731	0.156
1.15	-0.255	-1.31	-1.18	1.78		0.926	1.16	-0.787	-0.685	-0.0117		1.72	1.36	0.255	-1.08	0.677
0.526	1.32	-0.345	-0.51	-0.00627		1.66	0.597	-1.51	1.36	-0.392		1.52	0.243	-0.142	-0.0848	-0.458
0.112	0.448	-0.0319	-0.79	0.0516		1.08	0.629	-1.44	-1.93	1.17		1.9	1.66	-0.298	-0.584	-1.16
-0.493	0.398	-0.473	0.154	-0.155		0.675	0.152	-0.939	-1.06	0.521		1.07	1.54	-0.86	-0.883	0.589
-0.514	1.03	-0.238	-1.05	-0.402		1.55	1.13	-0.667	-1.53	1.2		-0.24	0.791	0.23	-0.438	1.37
-0.223	-0.177	-0.874	0.671	-1.97		1.88	0.531	-2.48	0.0625	1.14		-0.705	0.909	-1.14	-1.05	2.08
1.01	-0.00218	-1.17	0.721	-0.518		0.629	0.175	-0.94	-0.908	0.297		0.589	0.634	-0.455	-0.295	1.42
1.02	0.977	-0.799	-0.558	-2.05		1.1	1.01	-0.242	2.01	0.0184		1.02	1.56	-0.575	-0.468	1.11
0.867	-1.41	-0.985	-0.623	0.0222		1.19	0.981	-0.578	0.703	-0.069		1.42	1.71	-0.764	1.91	0.431
0.986	-1.83	-1.1	0.702	0.653		0.925	1.19	-0.348	0.834	-0.275		1.06	1.12	-0.681	-0.17	0.683
0.264	-1.54	-1.54	0.205	-1.41		0.849	-0.362	-2.19	0.468	1.52		0.582	1.49	0.133	0.312	1.39
1.11	-1.07	-2.01	-1.16	-0.821		1.84	0.293	-0.415	-0.218	0.365		0.951	-0.0533	0.00767	0.23	-0.229
-0.084	0.135	-2.66	1.1	0.768		1.66	0.928	0.162	-0.554	0.239		1.2	-0.728	-0.21	0.889	-0.707
0.935	-0.406	-2.25	0.113	0.195		1.71	1.21	0.734	-0.306	1.43		1.8	-0.863	-0.0785	0.586	-1.8
0.551	-0.595	-2.19	-1.64	0.37		2.43	0.691	1.15	-0.849	-1.77		2.15	-0.0763	-0.168	0.694	0.926
0.419	1.19	-2.13	1.9	-0.872		0.0254	0.507	1.45	-0.316	-0.373		1.62	0.166	1.06	1.08	-1.2
-0.981	0.00611	-1.05	1.07	-1.61		1.3	0.146	1.52	1.67	1.06		0.337	-0.56	0.145	0.00152	1.11
-0.582	-0.0695	-0.963	0.454	-1.2		0.504	-0.108	0.671	1.05	0.337		-0.802	-0.714	0.604	-0.801	1.01
-1.12	0.817	-1.24	0.435	-0.738		1.29	1.19	0.615	-0.0472	0.000675		-0.28	-0.777	0.00281	0.817	0.334
-0.957	-1.07	-1.22	-2.14	-0.808		0.525	0.354	0.687	0.457	-0.424		0.195	-0.467	0.584	-0.687	-0.127
-0.403	0.0827	-0.925	-0.258	0.0893		0.982	0.84	-0.231	0.232	-1.71		-0.412	-0.492	0.234	0.192	-0.252
-0.348	-0.128	-0.455	1.06	-1.09		0.563	1.38	-0.215	-2.15	-0.594		-0.366	-0.0958	-0.144	-1.02	0.853
0.106	0.521	-0.475	0.544	-1.05		-0.289	0.636	0.632	-0.919	-0.126		-0.284	0.651	0.189	0.0964	-1.02
0.391	0.675	0.0503	0.34	-1.31		1.4	0.358	1.49	0.14	0.674		-0.26	1.72	-0.232	1.36	-0.558
-0.126	0.495	0.02	1.83	-0.847		1.49	1.08	1.29	0.0636	-0.325		-1.26	0.946	0.284	0.0556	1.47
-1.11	0.614	-0.321	0.996	0.511		0.977	1.13	-0.13	-1.57	-0.931		-0.608	-0.0735	-0.0661	0.276	-0.798
-0.557	0.00164	0.0902	1.91	0.64		0.405	0.988	0.924	0.428	-0.868		-1.14	0.398	-0.519	-1.04	0.933
-0.593	2.86	0.043	0.794	0.858		0.253	0.802	0.662	-1.3	1.48		0.147	0.104	-0.457	-0.462	0.663
-0.617	1.01	-0.539	-0.882	-2.54		-0.0526	0.393	1.67	-0.331	-1.61		0.685	1.11	-0.455	-2	-0.538
-0.935	1.59	-0.773	2.53	-1.85		-0.198	0.81	1.61	0.542	2.24		0.526	-0.144	0.199	1.1	-1.84
-0.19	0.678	-0.482	1.2	-0.453		-0.246	1.13	-0.497	-0.626	0.18		0.106	-0.726	0.389	1.31	-0.122
0.298	-0.563	-0.605	-0.944	0.843		-0.273	1.15	-0.448	0.109	0.604		0.779	-0.302	0.705	0.855	-0.589
-0.182	1.13	-1.07	1.12	-0.87		-0.122	0.861	0.301	-0.446	-0.199		0.805	-0.252	1.65	-2.61	-0.459
-0.293	-0.767	-0.24	0.122	-0.436		-0.514	1.34	0.898	1.75	-0.664		0.588	-0.669	1.23	0.356	0.199
-0.378	-1.12	-0.211	-0.144	0.521		-0.57	1.35	-0.0296	-0.627	0.694		0.591	-0.851	1.55	-1.85	0.837
-0.256	-0.0786	0.158	-0.0822	-0.951		-0.585	0.164	-0.101	0.067	-0.469		1.11	-1.17	1.45	-0.799	0.983
-0.326	-0.698	0.0785	0.933	-0.399		0.539	0.576	-0.866	-1.79	0.775		0.0168	-0.782	2.02	0.177	0.584
-0.0204	-1.73	0.0241	0.134	-0.394		-0.707	0.918	-0.0262	1.49	-0.494		-0.134	-0.567	1.55	-0.569	2.42
-0.187	0.256	0.114	-0.386	-0.917		-1.63	0.699	-0.2	0.811	2.37		0.265	-0.889	1.79	-0.926	-0.231
-0.355	-1.11	-0.466	1.3	-2.09		-0.286	1.01	-0.291	-1	0.729		0.319	-1.38	1.94	-0.687	1.26
-0.731	0.847	-0.561	0.211	-0.191		-1.08	0.991	-0.53	0.196	1.05		0.162	-1.62	1.13	1.38	0.416
-0.8	-0.807	0.242	-0.264	-0.636		-0.643	1.41	0.352	-1.21	1.28		0.0831	-1.76	0.963	-1.17	-0.518
-0.673	-0.231	0.378	-0.365	-0.151		-0.734	0.904	0.454	1.52	-0.84		0.51	-1.72	0.568	-0.507	0.514
-1.26	0.911	0.668	-0.277	-1.13		-0.762	0.304	0.718	-0.513	-0.197		-0.367	-2.03	0.949	0.448	-0.123
-0.404	-0.387	-0.217	0.723	-0.383		-1.3	0.0326	0.32	-0.181	0.471		-0.471	-1.2	1.29	1.69	-0.326
-1.1	-0.688	0.189	0.313	0.741		0.131	-0.214	-0.119	0.642	-0.698		-0.29	-0.832	1.8	-1.28	1.48
-1.52	0.54	0.508	0.945	0.202		-0.169	-0.468	1.31	0.385	-0.873		-0.0267	-0.436	0.976	0.759	-0.255
-1.8	1.3	0.598	1.46	1.93		0.641	-1.01	0.924	0.388	-0.76		-0.64	-0.106	0.658	0.347	0.307
-1.59	-0.0659	0.0977	1.06	1.51		-0.0907	-0.332	0.398	-0.61	-0.896		-1.32	-0.886	0.928	0.645	-2.31
-1.85	-0.0737	0.247	-1.98	0.188		-1.08	-0.636	-0.139	-2.04	0.067		-0.96	-0.447	1.58	-0.115	-0.414
-1.94	-1.36	0.883	-0.738	2.14		-0.725	0.0343	0.733	0.466	-1.76		-0.576	1.33	1.48	1.02	-1
-0.842	-0.252	0.909	0.152	1.25		-1.28	-0.354	-0.22	0.461	-0.272		-0.404	1.78	1.56	0.49	-0.374
-1.98	-1.64	1.02	-0.677	0.841		-0.48	-0.634	1.36	-0.179	-1.38		-0.558	1.66	1.29	1.52	0.6
-1.66	1.09	0.735	0.624	1.24		-0.513	-0.536	1.25	1.25	-0.655		0.00631	1.55	0.78	0.554	1.03
-0.982	0.239	1.44	0.96	-0.0423		-0.797	0.275	1.63	-1.76	-0.969		-0.766	0.298	0.674	0.263	0.622
-0.742	-0.184	2.26	0.666	-0.286		-0.437	0.207	3.47	-0.625	0.911		-1.08	-0.339	-0.56	0.312	0.28
-0.546	0.0294	1.4	1.08	-0.0178		-0.679	0.0523	2.04	1.68	-0.557		-0.764	-0.829	0.216	2.18	-1.26
-0.639	-0.107	1.46	-0.206	0.348		-0.743	0.811	0.785	0.136	0.241		-0.409	-1.34	0.162	-0.205	0.279
-0.339	1.02	0.907	0.262	0.153		-1.03	1.77	0.354	-0.403	2.69		-0.382	-0.468	-0.0835	0.494	0.748
-0.297	-0.842	1.64	-0.0133	0.832		-1.17	0.00766	0.263	1.05	0.822		0.246	-0.342	0.23	-0.759	1.07
-0.717	-1.04	1.79	0.568	-0.189		-1.15	-0.515	0.637	1.57	1.16		-0.597	-0.368	-0.354	0.925	0.622
-1.13	-0.0459	2.24	-0.188	0.618		0.304	-0.634	-0.0905	-0.714	0.261		-0.996	-0.328	0.308	-1.53	-0.0617
0.0522	-0.223	2.45	-1.39	0.1		-1.76	-0.906	-1.1	-0.651	-0.14		-0.388	-1.21	0.697	-0.361	-1.31
-0.631	0.875	1.37	-1.04	-0.0754		-0.284	-0.512	-0.565	1.83	-1.12		-0.312	-1.13	0.102	-0.993	-0.984
0.261	0.639	1.11	-0.759	0.32		-1.34	-1.2	-0.496	-0.781	-1.49		-0.0522	-0.888	0.419	0.44	0.753
0.873	-0.967	0.838	-1.09	-0.174		-0.0224	-1	-0.908	0.218	-0.33		-0.595	-1.34	0.0649	0.543	-2.11
1.36	-1.94	0.402	-1.13	-1.49		-0.366	-1.06	0.0783	-0.202	0.756		0.277	-0.809	-0.446	0.297	-0.291
0.994	-1.57	1.08	-0.555	0.736		-0.159	-2.19	0.958	1.64	-0.79		-0.219	0.183	-0.783	1.01	-0.749
0.537	-1.27	0.523	0.131	-0.0369		-0.0105	-1.59	1.12	-0.578	0.613		-0.00693	0.991	0.952	1.09	-0.383
0.817	0.832	-0.000259	-0.352	0.682		-0.696	-2.48	0.103	0.765	-0.953		-0.699	0.686	0.39	-2.01	-0.567
1.17	0.066	0.235	0.0649	-0.585		-0.49	-0.65	-0.591	0.0632	0.259		-0.457	0.645	1.17	0.124	-1.17
0.859	1.04	0.393	-1.08	0.576		-0.218	-1.18	0.00298	1.5	0.186		-1.22	0.552	-1.07	0.319	-0.883
0.519	-0.674	0.308	-1.48	1.16		-1.38	-0.908	-0.783	-0.182	2.67		-0.692	0.472	-0.638	1.03	1.09
0.281	-0.455	0.25	0.543	-0.555		-0.186	-2.01	-0.933	-0.275	-0.513		-1.33	-0.184	-1.06	-0.328	0.584
-0.97	0.296	0.359	-1.01	-0.2		-0.587	-1.5	-0.872	-0.393	-0.512		-1.01	-0.393	-0.789	-0.483	-0.352
-0.238	1.25	0.0699	0.325	0.334		-0.879	-2.03	-0.176	-0.488	-0.455		-1.66	-0.0508	-0.56	0.72	0.0702
-0.527	2.99	0.00396	-0.763	1.77		-0.333	-2.93	0.244	-0.745	-1.34		-1.06	0.0742	-0.899	-0.843	-1.2
-1.05	0.689	0.326	-1.42	0.857		-1.09	-1.55	-0.998	-0.252	0.451		-1.36	0.773	-0.947	-0.201	-2.8
-1.05	-0.315	0.259	0.706	2.02		-0.0912	-1.94	-0.834	0.902	0.913		-0.76	-0.176	-1.19	0.154	-0.349
-0.742	0.405	-0.488	0.0603	0.928		-0.276	-0.75	-1.66	-1.73	-1.3		-0.802	-0.0479	-1.92	0.353	-0.0717
-0.386	1.34	-0.337	-2.74	1.43		-0.719	-0.461	0.0881	-0.851	0.627		-0.661	0.0371	-1.34	-0.128	0.93
-0.838	0.642	-0.374	-1.21	0.0986		-0.964	-1.79	-0.819	1.16	0.638		-0.795	0.225	-1.07	-0.632	-0.589
0.185	0.483	0.743	-1.48	1.58		-1.12	-0.651	-0.316	0.896	-0.055		-0.697	-0.219	-0.743	0.182	-1.15
1	0.681	0.319	-0.203	-0.281		-0.685	-1.34	0.00154	0.144	-0.247		-1.04	-1.3	-0.925	-1.98	-0.198
2	1.07	0.581	-0.717	-1.32		-0.196	-0.375	-1.88	1.68	-1.11		-1.36	-0.956	-1.29	-2.48	0.678
1.5	-0.165	0.721	-0.816	1.48		-0.873	0.627	0.194	1.04	-1.79		-0.863	-0.929	-1.2	-0.504	-2.08
1.48	0.332	-0.12	-0.463	1.05		-1.59	-0.0523	-0.665	0.418	0.246		-0.65	-1.26	-1.39	0.226	0.0251
0.433	-1.83	0.866	-0.502	0.244		-1.04	-0.722	-0.864	-0.327	1.48		-0.819	-1.04	-2.12	-0.736	1.22
1.44	1.68	1.06	0.0614	-1.43		-0.851	-0.856	-0.414	-0.81	2		-1.2	0.328	-1.77	1.84	-0.428
1.95	-0.809	1.4	2.24	-0.464		-1.13	-0.12	-1.19	-0.215	-0.398		-1.08	-0.822	-1.35	0.35	-0.234
1.99	-1.33	1.7	1.04	0.648		-0.64	-1.17	-2.15	1.22	0.482		-0.359	-1.16	-2.26	1.48	0.0924
2.27	-1.16	0.756	0.49	0.947		0.274	-0.711	-2.51	-0.0829	-0.348		-0.521	-0.095	-1.27	0.379	-1.21
1.49	-1.56	-0.0542	0.898	0.812		-1.31	-0.505	-0.999	0.0652	-0.45		-0.642	1.52	-2.12	-2.42	-1.85
1.76	-1.99	0.64	0.687	-1.79		-0.941	-0.7	-0.664	0.331	-0.0477		-0.53	2.52	-1.84	-1.46	-0.41
2.17	-1.23	0.924	3.33	0.29		0.435	-1.01	-1.51	2.01	1.42		0.0994	2.48	-2.34	0.31	-1.38
1.65	-0.0305	1.18	1.59	0.801		-0.12	-1.14	-1.12	0.114	-1.18		-0.435	3.93	-2.48	-0.0923	-1.88
1.49	-0.529	2.19	-1.17	0.677		-1.2	-0.0981	-1.04	-0.817	0.264		-0.701	3.18	-1.52	0.89	-0.789
2.27	-0.328	2.19	-1.27	0.527		-0.865	-0.2	-0.626	0.493	-0.585		0.0707	3.01	-1.07	0.641	1.02
1.97	1.71	1.23	-0.355	0.126		-1.46	0.143	-1.75	1.32	-0.633		0.993	2.65	-0.449	-1.03	0.6
1.37	-1.35	1.12	-0.496	1.28		-1.13	0.25	-2.63	-1.04	0.448		0.318	3.15	-0.38	1.25	1.25
1.49	0.282	0.286	0.0674	-1.07		-1.31	-0.297	-2.31	-0.724	1.11		0.0653	3.76	-1.06	0.097	-0.488
1.54	-1.5	1.43	-0.782	-0.272		-1.09	-0.844	-0.946	0.401	2.11		0.324	3.45	-0.633	1.19	0.958
1.84	-0.4	1.67	-1.04	-0.06		-1.52	-0.659	-1.96	0.719	-0.0277		0.309	3.19	-0.453	0.202	0.405
1.27	1.24	1.45	2.06	-0.735		-1.09	-1.97	-0.439	-0.334	1.08		0.527	2.98	-1.03	1.89	-0.0706
1.86	1.73	2.11	-0.272	-0.804		-2.12	-1.05	-0.3	-0.637	0.128		1.02	2.17	-0.86	-0.237	-1.55
1.52	-0.00922	2.17	-0.566	-0.0544		-1.11	-1.35	-2.16	-0.612	0.324		0.339	1.25	-1.68	0.574	-0.927
0.829	0.584	1.06	-0.269	1.29		-0.96	-0.135	-1.12	2.34	1.25		0.619	0.302	-1.23	-1.6	1.03
0.933	-1.37	0.909	2.21	0.654		-0.75	-1.4	-0.423	3.12	-0.166		0.493	1.62	-1.29	-1.32	0.328
1.3	-0.881	1.31	2.19	-0.0444		-0.498	-1.07	0.71	-0.456	-1.01		-0.595	0.868	-1.47	2.37	0.335
1.09	0.439	1.67	1.19	-1.22		-1	-0.0448	-0.25	1.58	0.538		-0.111	1.71	-1.74	1.8	-1.47
0.794	0.894	1.48	-0.226	-1.14		-1.05	-0.289	0.45	0.687	0.475		0.334	2.94	-1.36	0.595	-0.712
0.62	-0.128	0.611	-0.0481	-0.695		-0.654	-1.13	-0.327	-1.59	0.1		1.4	2.42	-0.335	-0.75	-1.68
0.525	-1.3	0.733	1.5	-0.248		-1.29	-1.11	-1.65	1.17	1.25		0.656	2.93	-0.0724	-0.741	-1.09
-0.482	-1.32	1.17	2.05	1.12		-0.917	-0.833	-1.92	0.754	1.11		1.04	2.93	-0.571	-0.491	0.949
0.0314	-0.14	0.882	0.574	-0.594		0.118	-0.441	-1.83	1.68	-0.544		0.139	4	0.164	2.25	0.771
0.67	-1.03	1.13	-0.0608	1.45		-0.357	-0.688	-0.923	0.0237	-0.778		0.339	3.71	0.0113	0.504	-0.385
0.0811	0.0898	0.784	0.159	1.17		-0.65	-0.804	-0.66	1.12	0.754		0.0838	4.16	-0.139	0.859	0.00214
-0.165	-1.26	1.38	1.12	-0.644		-2.03	-1.61	-0.931	2.42	-0.205		-0.167	3.3	-0.0279	0.366	-1.54
-0.172	-1.15	1.47	-0.567	-0.474		-0.638	-0.181	-0.935	2.69	-0.974		-0.287	3.06	-0.872	0.118	0.653
-0.0226	0.124	0.506	-0.622	0.144		-1.2	-1.22	-1.31	-0.17	0.109		0.167	2.48	-0.42	-0.0182	0.77
-0.425	0.298	0.866	-1.18	2.44		-1.6	-2.4	-2.09	0.0811	0.32		0.476	2.85	0.749	1.69	-0.68
0.158	0.939	0.31	-0.0939	0.171		-1.48	-2.29	-0.779	0.173	3.27		0.213	1.67	-0.352	0.571	0.519
0.449	-0.47	0.731	-0.818	-0.307		-1.58	-1.37	-0.847	-0.24	0.39		-0.762	2.67	0.167	0.967	-1.32
0.811	-0.354	0.581	0.675	0.392		0.169	-0.659	-0.29	-0.632	0.947		-0.147	3.18	-0.275	0.612	-1.11
0.28	-0.321	-0.0898	1.18	0.537		-0.632	-0.735	0.00899	0.572	1.71		-0.153	3.93	-0.0786	2.3	-0.338
0.282	-0.808	0.421	1.2	1.48		-0.78	-1.02	-0.01	-0.638	1.11		-0.592	3.57	0.0295	-0.4	0.271
-0.159	-1.07	0.482	0.902	1.3		-1.05	-0.489	-0.399	0.503	2.34		-0.0447	4.4	-0.362	-0.866	-0.118
0.127	-1.54	0.448	-0.294	-0.936		0.335	-0.883	-0.131	1.14	2.68		-0.641	3.11	-0.114	-0.536	-0.973
0.543	0.152	1.07	0.466	0.631		-0.697	-0.428	-0.383	0.832	1.63		-0.477	2.57	-0.707	-0.623	-0.517
-0.17	-0.309	1.06	0.393	0.0741		-0.693	-1.65	-1.61	-0.233	2.77		-0.22	3.03	0.0175	0.944	-0.362
-0.739	0.316	0.812	0.202	0.403		-0.167	-1.32	-0.822	1.17	3.37		1.14	3.05	0.279	0.0864	-1.14
-0.48	0.433	1.22	-1.4	-0.0926		0.464	-2.14	-0.471	-0.716	1.19		1.53	2.53	-0.113	0.799	-1.33
-0.569	0.561	1.35	-0.0721	0.238		-0.0624	-1.96	-0.113	0.657	-0.441		0.886	3.63	-0.251	1.86	-1.25
-0.891	-1.93	1.58	-1.99	0.359		1.14	-1.04	0.524	1.12	1.1		0.991	2.94	0.0249	0.973	-0.0693
-0.492	-1.91	0.562	0.847	0.207		1.05	-2.18	-0.17	0.282	1.11		0.668	2.75	-0.128	1.54	-0.702
-0.35	-0.437	1.02	-0.108	-0.674		0.647	-1.68	0.918	0.695	0.825		1.12	3.41	0.693	-1.51	-2.08
0.0787	-1.04	1.05	2.5	-1.15		0.447	-1.65	-0.538	0.441	0.178		1.18	2.02	0.418	2.1	-0.905
-0.303	0.22	-0.179	1.92	-1.25		0.317	-2.28	-0.853	0.945	1.91		0.406	2.47	-0.064	-0.157	-0.429
0.772	-0.874	-0.603	-1.13	-1.3		1.01	-0.777	-0.877	-1.4	1.38		0.0579	0.985	-0.209	-0.115	-0.845
-0.00932	0.233	-0.0185	0.869	-1.05		1.45	-1.71	-0.938	1.96	0.846		-0.391	0.85	-0.0667	1.68	0.898
-0.419	-2.88	0.815	0.718	0.977		1.03	-1.66	-0.791	1.48	1.71		0.437	0.896	-0.227	1.24	-1.15
-0.762	-2.7	0.384	0.314	0.775		0.703	-1.96	0.102	1.34	2.39		0.699	1.82	-0.873	1.23	-2.91
-0.254	-0.246	0.68	0.497	-1.11		0.402	-1.61	-0.586	1.21	3.06		0.56	0.482	-1.47	-1.07	-0.453
-0.396	-1.06	0.917	-0.497	-0.14		0.61	-1.76	-0.619	-0.632	1.74		0.203	1.7	-0.744	3.2	-0.483
-1.18	0.773	1.51	0.952	-0.146		-0.0364	-0.741	-0.345	3.15	0.423		0.00557	2.06	-0.88	1.46	-0.275
-0.705	0.0815	1.41	2.49	-2.02		-0.021	-1.33	-0.47	1.61	1.42		1.33	2.9	-1.13	0.459	-1.35
-0.565	0.673	0.0652	3.4	-0.938		0.339	-1.94	-0.0953	0.897	1.44		0.886	4.7	-1.06	-0.278	-2.36
-1.08	1.5	1.1	6.32	0.311		-0.303	-2.13	-0.888	1.26	1.52		1.26	5.17	-0.831	-0.559	-2.41
-1.45	0.0275	0.248	3.95	0.0309		0.318	-2.16	-0.798	2.13	0.746		1.32	5.7	-0.944	-0.0368	2.14
-2.08	-1.7	0.197	0.228	-0.836		1.3	-1.65	-0.567	0.893	1.84		1.24	5.36	-0.486	1.19	0.984
-1.59	-1.8	0.978	-1.03	-0.423		-0.275	-0.821	0.202	1.39	0.666		1.41	5.34	-0.153	1.17	-1.16
0.561	0.128	0.39	1.46	0.149		1.19	-1.96	-1.13	2.66	0.842		1.09	5.24	-0.839	-1.19	-0.585
1.32	-0.597	0.263	0.0842	-0.842		0.569	-1.99	-0.588	1.92	2.73		1.45	4.19	-1.54	0.391	-0.561
0.688	-1.5	0.217	0.695	-2.41		-0.523	-1.04	-0.913	0.0648	1.41		0.797	4.4	-1.75	0.623	-1.61
1.11	-0.888	0.348	1.86	0.714		-0.173	-1.85	-1.43	0.543	1.11		1.05	4.51	-0.774	1.36	-0.269
0.537	-1.19	0.917	2.68	0.43		1.4	-1.19	0.00132	0.963	1.96		1.58	3.89	-1.55	-0.99	0.278
-0.221	-2.25	-0.25	0.49	0.552		0.533	-1.8	-0.0653	1.32	3.56		2.15	2.62	-0.984	0.227	-0.295
-0.551	-0.178	-0.0458	0.236	1.11		2	-0.995	-1.13	1.64	1.96		2.05	2.64	-1	0.641	-0.976
-0.564	-1.61	-0.201	-1.15	-0.803		0.502	-1.58	0.16	0.572	0.0214		1.63	1.82	-0.404	0.413	-1.17
0.418	-1.66	-0.528	-0.5	0.76		1.65	-1.81	-0.326	0.19	0.824		2.27	0.703	-1.21	2.06	-1.16
0.812	-1.68	0.0862	0.667	1.29		1.36	-2.83	-0.773	0.52	2.02		2.33	0.624	-0.214	0.254	0.243
-0.367	-1.49	-0.821	1.92	1.56		1.75	-2.23	-1.06	0.893	1.59		2.06	-0.124	-0.708	1.83	-0.177
-0.446	-1.32	-0.498	1.85	-1.64		1.08	-1.95	-0.883	0.547	0.787		1.44	1.31	-0.47	0.768	-2.17
0.0712	-0.447	0.468	1.64	-0.634		1.92	-1.87	-1	1.68	1.67		2.3	1.6	-0.871	1.33	-0.722
-0.463	-0.356	-0.0133	2.22	0.829		1.54	-2.44	-0.846	2.71	2.83		1.8	1	-1.2	0.134	-1.53
0.283	-1.65	0.214	0.134	1.56		1.02	-2.21	-1.54	1.56	1.27		1.66	2.17	-0.698	2.27	-0.236
-0.0281	-1.36	0.154	0.933	-0.703		1.71	-1.7	-2.45	0.967	0.885		2.09	1.55	-0.83	0.501	-1.05
0.422	-1.6	-0.403	0.84	1.3		2.07	-1.52	-1.35	0.66	-0.818		1.97	1.83	-1.13	2.2	-1.17
0.738	-2.25	-0.536	0.616	-0.743		2.04	-1.28	-2.32	1.15	-0.44		2.12	1.61	-1.88	1.71	-0.416
0.256	-1.5	-0.619	-0.826	0.622		1.75	-0.816	-3.16	1.96	1.05		2.59	0.541	-1.89	2.39	-0.0949
-0.307	-0.623	0.25	0.439	0.269		3.19	-1.89	-3.01	1.79	1.37		2.96	1.86	-1.69	1.7	1.52
-0.0084	0.0147	-0.307	0.209	-0.311		0.74	-1.43	-2.57	1.76	2.35		2.6	2.49	-1.82	1.17	-0.24
0.261	-1.34	-0.459	-0.747	-0.574		0.834	-2.15	-2.96	1.51	0.988		2.81	2.43	-2.17	1.93	-0.241
0.841	-1.48	-0.0954	-0.0542	-0.697		1.52	-1.09	-1.67	1.21	1.06		2.15	3.88	-2.44	2.18	-0.325
0.558	-0.852	-0.896	-0.868	1		1.56	-1.72	-2.48	3.66	1.09		1.36	4.08	-2.88	2.54	-0.513
1.53	1.43	-0.587	-0.224	1.05		2.11	-0.783	-1.73	1.43	2.42		0.714	3.99	-2.78	3.87	-2.05
1.37	-1.35	-0.667	0.936	3.17		1.13	-1.23	-1.19	3.4	1.83		0.621	2.5	-2.74	3.1	0.804
0.871	0.00168	-0.226	0.418	-0.589		2.16	-0.437	-0.557	4.27	2.49		0.881	5.29	-2.36	2.29	0.532
0.764	-0.977	0.287	0.287	-1.46		1.48	-1.6	-2.11	3.83	0.0578		0.555	4.37	-1.83	3.14	-1.33
1.38	0.012	0.403	0.755	0.00953		0.962	-2.29	-0.928	3.8	0.846		1.66	5.29	-1.97	3.01	-0.5
2.13	-1.12	-0.0019	0.341	-0.946		0.147	-2.42	-2.06	4.11	-0.962		1.61	4.18	-1.79	4.08	-2.44
2.87	-0.779	-0.261	-1.06	-2.26		1.78	-0.647	-2.12	4.73	-0.351		1.39	3.45	-2.05	4.88	-0.154
3.46	-0.269	-0.36	-0.228	-2.43		0.465	-1.33	-1.82	5.25	0.252		1.02	1.69	-1.95	4.43	-0.644
2.79	-0.0467	-0.348	-1.15	-0.98		0.658	-1.06	-0.502	5.53	1.33		1.27	0.638	-1.92	6.04	0.423
3.27	0.548	-0.27	0.192	-0.891		0.657	-0.505	-1.82	6.07	0.355		1.29	0.791	-1.8	5.61	0.322
3.01	-0.86	-0.392	-0.332	-1.9		1.18	-0.99	0.253	5	0.432		1.85	0.311	-1.72	5.09	-2.11
3.21	-2.18	-0.291	-1.18	0.877		0.468	-0.455	-1.87	5.26	-1.31		1.81	0.555	-1.7	2.7	-1.8
2.79	-1.19	-1.04	-1.11	1.26		1.33	0.105	-1.76	4.76	-1.4		0.852	-0.424	-2.15	3.46	0.281
3.03	-1.18	-0.28	-0.838	0.0157		0.346	-0.665	-1.56	5.34	-0.939		1.59	-0.296	-1.59	5.3	-0.821
2.79	-1.39	0.134	-1.51	0.505		0.93	-0.128	-0.928	3.41	-0.826		1.46	-0.531	-0.717	5.58	1.22
2.69	-1.5	-0.318	-0.98	1.23		0.803	-1.15	-0.886	5.28	-1.7		1.88	-0.598	-1.74	4.57	-2.46
2.64	-0.742	0.407	-0.714	-1.43		0.422	-1.22	-0.427	6.07	-0.856		2.02	-1.77	-2	5.59	0.0273
2.53	-0.526	-0.212	-0.0132	0.153		0.411	0.271	-0.953	4.06	-3.36		1.98	-1.76	-1.28	5.13	-1.1
3.23	-0.0394	0.308	-1.14	-0.255		-0.673	-0.275	-2.21	4.44	-2.21		2.04	1.72	-0.415	7.12	-0.422
2.29	0.389	0.383	-0.835	0.939		1.37	-0.857	-2.47	5.22	-0.81		2.36	2.86	-0.169	7.32	1.02
3.07	1.57	0.5	-0.166	-0.0967		-0.572	-0.79	-2.43	4.3	-2.44		2.85	3.9	-0.318	5.37	2.2
2.33	2.14	1.52	0.837	-0.712		1.01	-0.881	-2.36	3.87	-0.327		2.85	3.14	-0.717	1.45	0.963
2.4	3.02	0.858	2.87	-0.612		0.293	-0.608	-2.08	4.65	-0.0693		2.63	3.95	-0.0741	4.36	0.0189
2.22	2.92	1.44	2.46	0.599		1.05	-0.819	-1.84	4.53	-2.15		2.83	4.16	0.0377	3.66	2.03
1.79	1.8	1.1	3.59	0.328		0.979	-0.587	-1.76	7.66	-0.0904		2.15	4.52	0.739	5.3	2.17
2.34	2.56	1.59	2.31	-0.562		1.16	-0.117	-2.18	7.28	-0.764		2.75	4.56	1.36	3.84	3.5
2.39	1.97	2.41	1.13	-0.344		0.953	-0.431	-0.907	3.29	0.306		2.42	4.46	0.862	2.24	2.05
2.8	-0.301	1.66	1.65	0.808		1.59	-0.558	-0.575	5.25	0.867		2.99	4.23	1.15	4.07	1.37
2.72	2.86	1.4	2.52	1.82		0.676	-0.185	-1.77	4.38	1.52		2.85	4.37	0.844	3.39	1.71
2.37	3.16	1.92	1.95	0.863		1.07	-0.875	-0.998	4.13	1.31		3	5.04	0.699	1.98	2.21
1.91	2.64	2.53	2.58	2.18		0.269	-0.492	-0.794	4.89	2.32		3.56	4.11	0.486	4.91	4.17
2.34	2.97	2.19	0.81	1.96		1.08	-0.425	0.00533	4.54	0.961		2.3	4.01	0.778	4.45	2.43
2.29	2.02	1.67	2.51	2.19		-0.000273	-0.706	0.371	6.11	1.79		2.95	3.61	0.289	4.84	3.26
2.13	2.45	2.16	3.13	2.71		1.08	-0.724	0.323	6.66	1.46		2.96	3.41	1.06	4.97	2.74
2.32	3.73	1.43	2.63	2.92		0.451	0.0562	1.07	5.64	-0.319		3.08	4.88	0.583	5.05	2.18
1.62	2.68	1.47	4	3.03		1.44	-0.464	0.147	5.85	1.83		2.74	5.07	0.068	5.34	1.26
2.06	1.5	1.08	2.05	0.983		1.04	-0.971	0.0371	6.72	1.62		2.72	5.18	0.771	5.8	2.52
1.74	2.3	2.01	2.35	2.68		1.65	-1.45	0.241	5.78	1.23		3.07	5.61	1.15	6.67	2.12
1.71	2.55	1.65	3.33	1.5		2	-1.2	1.02	5.33	1.76		2.82	5.57	0.827	5.13	1.78
1.78	2.82	1.7	3.39	3.15		1.46	-0.795	-0.361	5.12	0.605		3.44	7.11	0.818	4.88	2.02
1.28	2.53	0.648	2.99	3.22		1.41	-1.26	0.179	3.58	1.98		2.94	6.28	1.02	5.95	2.67
1.39	2.67	1.16	1.79	0.584		2.08	-1.05	0.617	4.73	2.71		2.59	5.66	0.559	4.48	-0.318
1.12	1.38	1.22	3.55	0.595		1.49	-1.04	1.11	6.06	3.01		2.87	7.49	0.725	5.03	1.15
1.21	2.84	1.01	5.58	2.45		1.62	-1.11	0.0532	4.35	2.98		2.93	7.15	0.14	6.72	1.97
1.7	2.61	-0.0793	2.15	3.31		2.89	-1.22	0.0544	4.08	1.49		2.59	5.76	0.193	4.38	-0.753
0.677	2.22	1.12	3.83	3.09		1.37	-1.28	0.495	5.36	1.18		3.14	6.43	-0.563	5.09	3.54
1.62	2.87	0.496	3.89	1.38		0.83	0.771	0.315	4.62	2.86		2.91	6.77	-0.0484	6.05	1.99
1.14	4.14	0.745	2.94	1.19		2.28	-0.194	1.48	6.65	1.44		2.76	7.3	-0.41	5.19	0.633
1.85	3.98	0.965	2.95	1.52		2.31	-0.0145	0.829	5.47	2.81		3.61	6.27	-0.165	6.02	2.47
2.49	5	1.19	4.03	1.76		0.601	0.127	1.14	2.92	1.57		3.21	6.86	-0.00415	6.17	1.97
1.73	3.63	0.8	4.05	1.25		2.13	0.0557	0.198	4.29	1.33		2.64	6.37	0.268	5.38	1.8
2.13	4.66	1.57	3.21	1.25		1.4	-0.0417	0.434	5.25	1.65		2.97	6.6	0.0258	5.23	0.86
0.692	3.56	0.463	2.5	0.183		1.55	0.741	0.0981	5.65	0.69		2.79	6.72	-0.613	7.85	-0.459
0.645	2.59	0.499	2.55	0.392		1.11	0.521	1.16	4.21	2.07		3.62	7.82	0.381	5.57	2.32
2.47	4.17	1.26	2.22	1.05		1.04	0.561	2.42	5.06	2.21		3.55	6.55	0.81	6.46	1.09
1.21	5.62	1.01	3.7	0.711		1.4	0.11	2.03	4.69	2.36		3.56	6.46	0.893	6.01	-0.587
1.44	5.35	0.335	2.34	1.83		3.12	0.428	2.05	4.35	1.55		3.31	4.8	0.484	7.23	0.906
1.55	3.55	1.03	3.32	2.26		3.44	0.5	1.65	4.22	0.63		3.46	5.91	0.349	8.57	2.59
0.922	4.74	1.11	3.21	3.03		2.29	1.26	2.44	5.71	0.649		2.89	5.49	-0.14	6.07	-0.118
0.527	4.3	0.605	1.92	3.75		2.78	2.65	3.14	4.31	0.063		3.37	5.84	0.0537	5.64	1.68
-0.0766	4.18	0.58	2.6	2.69		3.08	2.6	3.83	4.48	2.06		3.61	5.88	0.0503	6.83	1.73
0.214	3.76	0.674	3.31	2.03		1.07	2.13	3.18	6.71	2.86		4.54	6.08	0.319	5.53	1.79
0.73	4.14	1.07	1.8	1.02		2.14	1.52	2.63	6.19	2.61		4.36	4.92	1.08	6.55	1.86
0.758	3.17	0.36	0.378	0.917		2.33	1.72	2.55	5.27	1.72		4.08	5.09	1.68	7.8	0.367
1.27	2.22	0.402	3.12	1.99		1.94	1.43	2.61	4.79	2.05		4.6	4.49	1.33	7.33	0.812
0.544	3.89	0.448	2.9	2.25		2.47	0.964	2.33	2.66	-1.02		4.27	3.44	1.73	7.22	0.78
0.105	2.07	0.715	0.86	2.43		2.59	0.803	2.95	3.9	1.15		4.86	3.67	1.07	8.11	0.828
0.284	2.43	1.61	1.4	2.79		2.5	1.21	3.35	5.5	2.16		4.16	3.67	0.915	9.22	3.33
-0.109	1.54	1.17	2.25	3.85		2.1	0.821	3.62	4.22	0.704		4.39	4.52	1.36	7.1	2.13
0.233	3.42	0.634	1.13	3.02		2.3	1.62	4.35	5.38	1.32		4.76	3.19	0.468	6.45	1.44
-0.49	2.53	0.754	2.92	1.25		2.53	0.856	4.05	5.5	0.486		4.91	3.02	0.612	7.18	1.94
-0.00726	2.4	0.435	0.775	1.64		2.66	1.47	2.93	4.81	1.29		5.28	3.99	0.0839	6.88	2.69
0.338	3.76	1.16	2.09	2.15		1.97	1.51	2.76	4.13	1.19		5.72	3.26	0.758	7.6	2.47
0.595	2.4	1	2.06	3		1.26	1.19	4.74	4.09	0.703		5.59	4.05	0.659	8.84	3.37
1.74	5.01	0.471	2.53	2.58		1.4	1.73	5.29	4.59	0.928		5.79	4.31	0.772	5.96	3.31
1.19	2.39	0.591	1.92	0.954		1.2	2.36	5.72	5.23	0.683		5.87	4.65	1.08	5.61	1.18
1.16	3.33	1.04	1.05	1.1		2.61	4.28	6.3	6.49	0.341		5.72	4.74	1.35	5.83	1.98
0.756	1.64	0.857	0.923	1.68		1.57	4.28	6.75	3.94	2.16		5.62	5.24	1.83	7.77	1.17
1.73	2.07	1.07	1.58	0.787		2.05	4.13	4.7	6.55	3.48		6.35	5.48	1.58	7.54	0.514
1.03	1.25	0.962	0.135	1.98		2.19	4.45	4.25	4.03	2		4.88	4.77	2.21	8.38	3.28
1.97	3.6	0.691	2.25	2.53		2.27	4.93	4.06	4.9	-0.132		5.67	4.31	2.25	6.62	1.18
2.53	1.87	0.383	0.502	4.15		0.976	4.53	6.09	5.18	-0.647		5.41	4.98	1.94	7.92	1.36
2.59	1.74	0.747	0.177	1.84		2.53	4.42	6.62	5.37	2.4		5.63	5.15	1.69	9.31	2.2
2.17	2.23	0.646	1.48	3.26		2.25	4.19	7.4	3.34	1.56		5.77	6.55	2.26	6.12	1.86
2.82	2.19	0.781	1.75	2.85		2.47	4.77	6.77	6.23	0.309		6.21	6	2.07	6.98	0.641
1.97	2.21	0.806	1.73	3.31		3.51	4.4	5.26	5.53	1.71		5.33	4.8	2.56	8.64	2.09
3.03	2.29	0.766	2.53	3.26		3.77	3.36	5.53	4.63	0.575		5.92	5.36	2.74	9.27	2.45
3.08	2.26	0.95	0.714	1.55		6.32	3.57	5.63	5.42	0.255		5.99	5.07	2.35	8.48	0.94
2.68	3.15	1.5	0.262	2.4		6.57	5.01	5.95	4.58	2.66		5.94	5.27	2.98	7.79	1.28
2.06	2.51	1.11	-0.57	0.888		7.73	5.26	6.35	6.8	0.927		5.94	5	2.63	6.53	4.6
2.02	-0.148	1.48	-0.518	1.55		7.93	4.93	5.78	5.82	0.873		6.03	4.84	3.03	8.75	1.62
1.87	1.44	1.49	1.36	0.306		7.38	3.18	5.36	4.94	1.18		5.57	4.7	4.25	7.77	0.527
1.37	-0.297	1.41	1.95	2.25		7.69	3.51	4.41	4.18	0.595		4.61	5.05	5.19	8.62	-0.0948
1.97	0.597	1.56	1.5	1.21		7.98	3.47	5.37	3.52	1.12		5.74	4.13	5.5	8.23	3.14
1.11	1.32	1.18	1.03	3.26		6.16	3.12	5.57	3.83	-0.534		5.24	4.21	5.15	10.2	1.98
1.62	1.68	1.34	0.766	2.26		7.72	4.81	4.09	5.64	0.345		4.59	5.46	5.75	10.7	1.06
1.34	0.238	0.884	-0.00406	1.36		6.1	4.21	4.64	4.75	1.33		5.37	4.86	5.54	9.91	1.51
2.15	1.07	1.15	1.49	2.31		5.93	4.61	4.82	4.12	-0.586		5.59	4.55	5.15	9.1	1.49
0.948	1.69	1.42	0.0607	3.11		6.25	3.16	3.63	3.3	2.15		5.43	4.26	5.42	8.22	2.86
1.43	-0.632	0.711	0.294	2.63		6.34	3.37	3.98	4.52	0.308		5.42	5	5.77	8.06	1.8
0.887	1.79	1.35	0.77	1.87		5.82	2.8	4.06	4.01	0.33		5.77	4.17	5.6	7.49	0.171
0.283	0.562	1.04	1.25	2.22		6	3.23	4.9	4.27	1.4		5.19	5.08	5.77	7.48	0.753
0.391	-0.173	0.775	-0.807	2.08		6.8	3.39	4.01	3.97	-0.483		4.57	5.39	5.53	7.43	1.83
1.25	-0.764	0.713	2.3	2.46		7.09	3.21	3.16	3.56	1.2		5.22	5.8	5.85	8.47	1.88
1.43	0.75	0.912	1.37	2.66		7.12	3.24	2.6	3.49	-0.318		5.01	5.69	6.07	9.58	1.25
1.34	1.13	0.131	-0.905	3.3		6.2	4.54	2.91	4.24	0.282		5.47	6.42	4.68	8.01	1.58
-0.0686	1.21	0.0577	1.46	2.22		6.43	3.88	3.76	4.86	-0.505		4.91	6.83	4.38	6.8	1.63
-0.208	1.35	-0.0691	0.787	2.39		6.31	2.92	3	4.72	1.46		4.84	4.4	4.82	7.48	2.72
0.65	1.54	0.179	0.172	3.49		5.64	2.78	3.12	3.51	0.779		4.48	5.35	5.74	9.57	1.61
0.95	0.16	0.809	1.26	3.76		5.78	3.42	2.86	4.73	2.37		5.06	4.83	5.3	7.24	-0.0436
0.301	2.17	1.35	0.106	4.49		4.85	4.31	3.57	5.17	1.59		5.74	4.73	4.48	7.23	0.483
0.524	0.339	0.482	0.93	2.69		4.69	3.01	3.63	3.94	1.56		5.24	4.95	4.31	7.29	2.04
0.5	0.424	1.11	-0.121	2.13		5.1	3.94	4.42	3.52	1.81		4.77	5.72	3.68	8.21	1.21
0.576	-0.297	0.333	0.871	3.68		4.45	1.59	3.64	5.63	1.76		4.51	4.98	4.43	6.89	2.11
1.17	0.646	0.511	0.656	4.13		3.64	2.09	3.71	3.54	0.146		4.01	5.41	4.49	6.52	2.53
0.316	0.158	-0.066	-1.39	3.19		3.39	2.23	4.47	3.25	2.58		4.44	5.22	4.04	5.13	0.953
-0.446	1.8	-0.194	-0.242	1.06		4.38	2.7	3.53	5.21	2.21		5.4	6.06	4.15	7.4	0.385
0.595	0.951	-0.404	-0.642	1.85		4.86	3.76	1.81	6.5	-0.307		5.35	4.33	4.57	6.95	1.92
0.772	0.203	0.0226	-1.14	2.32		3.54	3.09	1.88	6.95	2.8		5.52	5.72	4.76	8.9	1.53
0.676	1.56	0.0565	-2.3	2		5.09	2.72	2.46	3.89	1.33		6.12	4.86	4.63	8.82	0.404
0.249	1.41	-0.297	-1.43	2.04		5.3	3.9	1.92	5.9	1.82		4.61	4.79	4.52	7.7	1.21
0.411	0.0779	-0.396	-1.14	3.47		4.59	3.67	3.24	6.01	1.13		3.9	4.83	4.09	7.22	2.25
0.852	0.253	-0.522	-1.51	0.608		4.87	3.4	3.24	3.16	0.706		4.23	4.28	4.42	9.18	1.89
0.0883	0.678	0.0605	-0.406	2.19		4.43	4.83	2.48	4.96	1.01		3.62	4.19	4.27	9.13	0.593
0.486	1.69	-0.935	-1.09	2.72		4.63	6.77	2.05	4.86	1.27		4.67	5.03	4.11	7.39	-0.0254
0.454	1.32	-0.62	-0.54	1.32		5.05	7.94	2.75	3.52	2.03		4.62	4.89	4.37	7.75	0.938
1.04	0.847	-0.322	0.464	1.34		4.33	9.18	1.72	6.39	1.66		4.61	5.44	3.51	8.74	1.09
0.929	1.28	0.214	-0.229	2.02		4.03	8.35	2.5	3.88	2.36		4.53	5.21	3.99	8.51	0.209
0.358	-0.363	-0.245	-0.926	1.29		3.68	8.61	2.97	4.26	0.947		4.53	5.14	4.5	8.79	1.48
1.2	1.38	-0.824	-1.87	1.63		3.8	8.66	2.89	3.42	1.12		3.96	5.07	4.17	7.88	1.64
1.3	0.385	-0.496	-2.14	2.29		4.89	8.37	2.34	3.86	3.01		5.27	5.63	3.24	7.35	0.311
0.829	1.76	-0.405	-1.67	0.413		4.49	9.16	2.04	4.85	1.6		5.51	4.49	3.78	6.9	0.0412
0.565	0.349	-0.384	1.08	0.936		3.44	6.49	0.747	3.81	2.22		5.68	4.84	4.02	8.01	-0.867
-0.287	1.52	-0.334	0.322	0.27		4.55	6.87	1.65	4.79	2.36		4.66	5.13	3.36	8.27	0.22
-0.633	0.969	-0.552	-0.973	1.71		3.9	6.07	1.6	3.08	3.43		4.71	6.01	3.45	8.02	0.567
-0.251	1.98	-0.644	-1.46	-1.14		4.68	8.03	2.74	3.5	3.69		5.82	6.81	3.56	8.94	2.65
-0.964	0.459	-0.215	-0.782	1.8		3.76	6.93	1.74	4.83	2.02		5.41	6.57	3.75	8.23	1.78
-1.04	1.24	-0.505	0.147	0.438		3.9	7.19	2.21	3.66	1.93		5.92	6.29	4.35	6.08	2.25
-0.821	2.18	-0.983	-0.568	1.48		2.4	6	3.05	3.48	5.05		6.14	6.31	4.36	8.03	2.76
-0.483	3.26	-0.553	-0.402	0.7		3.06	6.98	3.32	2.58	4.18		5.98	6.32	3.23	8.28	1.68
0.581	3.9	-0.831	0.697	1.2		3.84	7.11	-0.168	3.11	4.11		5.82	6.48	2.72	9.1	2.79
0.777	2.69	-0.532	0.822	1.58		2.34	7.52	0.000771	3.35	4.87		5.38	6	3.32	8.87	1.69
-0.0159	2.69	0.443	0.924	1.59		2.81	6.75	0.0504	4.07	5.03		5.47	6.53	3.54	9.45	3.2
-0.0202	2.36	0.142	1.12	1.28		2.5	6.17	0.946	3.04	2.72		5.56	5.99	3.57	9.09	2.53
-1.44	2.03	-0.0758	1.76	-0.257		3.35	6.84	0.751	3.92	3.4		5.47	7.03	3.75	9.23	2.63
0.189	2.81	-0.0742	1.18	0.188		2.81	6.84	0.15	3.74	3.36		5.52	7	3.75	8.26	3.24
0.373	2.45	-0.234	1.48	-0.559		1.77	6.55	0.689	2.74	2.77		5.68	7.64	3.52	7.75	3.35
1.27	1.38	0.0534	2.43	1.12		1.02	6.09	0.779	3.43	5.45		5.07	7.51	3.57	7.78	3.68
1.52	-0.323	0.221	2.52	-0.714		1.23	5.95	-0.036	3.48	3.26		5.4	8.5	3.39	9.13	1.72
0.719	2.23	-0.512	3.38	-0.537		2.53	5.56	-0.0575	3.94	3.99		4.57	8.84	3.74	7.64	3.21
0.475	0.637	-0.254	2.71	-0.0244		2.11	6.25	0.0191	3.89	3.17		4.63	8.54	3.56	8.24	2.54
-0.287	1.17	-0.221	4.42	3.4		2.67	5.83	-0.137	3.54	3.79		4.75	9.43	2.88	7.8	3.16
0.142	1.53	-0.29	3.33	1.93		3.18	6.54	0.764	4.03	2.94		4.66	8.75	3.62	7.89	2.06
0.5	0.13	0.271	3.04	3.18		1.5	6.52	1.23	2.02	4.15		4.91	8.13	3.27	8.88	2.73
0.486	1.44	0.241	3.13	2.1		2.28	6.23	0.905	4.08	3.77		4.19	7.41	3.76	8.07	2.53
-0.663	1.52	0.0851	3.58	2.33		2.86	7.84	0.406	3.68	4.1		4.1	7.45	3.64	8.53	3.34
-0.377	0.214	-0.00978	3.85	2.19		2.42	6.17	0.952	2.75	3.63		4.4	6.28	3.43	7.31	2.28
-0.943	1.8	0.632	2.9	2.36		3.51	6.3	-0.409	4.87	4.03		3.85	7.73	3.18	8.64	0.543
-0.545	2.04	-0.198	3.5	1.79		2.61	7.26	-0.495	4.44	3.08		3.58	8.4	3.51	9.3	2
-0.513	0.239	-0.442	3.9	3.01		2.5	6	0.513	2.49	4.47		4.33	8.71	2.77	8.35	3.61
-0.679	-0.171	-0.91	3.1	-0.641		1.77	5.42	1.94	2.9	3.26		4.28	7.55	3.04	5.47	4.37
-0.484	0.516	-0.229	3.21	1.05		3.1	5.81	1.1	2.55	2.94		4	8.52	3.17	6.51	4.14
-0.952	-0.544	-0.575	4.47	2.28		2.9	5.32	2.87	3.8	2.44		3.55	7.85	2.92	6.76	3.46
-1.56	1.22	-0.671	4.33	2.22		2.67	4.71	1.04	3.33	3		4.41	6.47	3.18	5.31	4.67
-0.758	-0.468	-0.852	3.5	1.2		2.6	5.43	1.3	3.29	3.95		4.35	8.16	3.09	7.23	3.08
-1.59	1.7	-0.389	2.58	0.393		3.19	4.95	1.89	2.28	2.84		4.45	7.22	3.85	6.8	3.05
-1.18	-1.13	-0.467	2.89	0.702		2.58	4.97	2.72	3.24	1.73		3.63	7.31	3.25	6.19	3.59
-0.605	0.444	-0.52	4.02	1.23		2.13	5.4	3.02	2.18	4.16		4.42	8.11	3.1	6.54	3.76
-0.99	-0.729	-0.788	4.42	0.592		1.4	4.76	1.41	4.08	2.66		3.81	7.69	3.29	7.65	5.55
-0.281	-0.0887	-0.174	3.83	1.73		2.09	4.78	0.693	2.59	3.47		4.17	7.53	3.25	7.58	3.93
-0.635	-0.0864	-0.451	3.02	2.34		2.19	4.14	0.605	3.28	4.12		3.91	8.27	3.28	9.48	5.29
0.175	0.53	-0.939	2.17	1.77		1.69	4.84	1.24	2.76	2.56		3.7	6.69	3.8	6.21	3.18
0.0747	-0.773	-0.638	3.24	0.751		2.68	5.24	1.53	3.39	1.41		3.47	6.99	4.24	6.84	4.21
-0.383	1.41	-0.458	5.74	1.95		2.55	6.06	2.82	3.43	2.07		3.73	6.15	4.17	7.97	4.24
-0.365	1.33	-0.865	3.39	1.14		2.94	5.78	2.74	2.79	1.62		3.55	6.13	4.22	9.29	6.68
1.3	0.313	-0.325	2.47	0.179		2.71	4.84	2.22	3.98	2.69		3.82	6.91	4.29	6.73	5.53
1.69	1.08	-0.141	2.24	3.59		2.17	5.86	1.51	4.14	0.882		4.64	7.04	5.11	7.34	4.83
0.492	-0.0413	-1.09	1.95	0.841		1.6	5.58	1.63	1.91	2.18		3.75	6.79	3.76	6.16	4.69
-0.0577	-0.842	-0.569	3.22	-0.338		3.31	4.79	1.93	2.59	2.75		4.12	7.98	4.01	8.4	5.4
0.239	0.871	-0.303	2.87	0.241		2.78	4.75	1.94	3.49	2.33		4.06	7.67	4.79	8.19	6.33
1.13	2.59	0.172	2.48	-0.687		1.94	4.73	0.714	2.75	0.325		4.18	8	4.13	6.81	5.13
1.64	6.98	0.094	1.85	0.345		1.97	4.29	1.89	2.22	0.479		4.1	7.12	3.93	5.47	6.17
0.595	3.46	-0.0152	2.87	0.728		2.45	5.74	2.11	1.78	1.12		4.23	7.04	3.79	8.22	7.27
0.655	5.64	0.156	1.17	1		3.14	5.2	0.799	2.4	1.16		4.52	7.51	3.55	9.27	5.64
0.744	3.67	-0.559	0.649	0.119		2.08	5.1	1.15	3.86	2.92		4.52	7.31	4.07	7.68	5.78
0.0623	2.39	0.373	1.22	1.12		0.939	5.46	1.6	4.88	1.39		4.66	6.53	3.86	6.37	5.95
0.282	4.67	-0.725	1.29	-0.135		2.06	6.11	2.93	3.63	1.47		4.37	7.1	3.4	5.98	5.38
0.453	5.22	-0.621	-0.217	-0.209		2.61	5.54	1.82	3.4	0.973		3.95	6.7	4.57	7.49	7.51
0.721	4.76	0.12	-0.278	1.09		1.49	4.79	2.27	4.19	1.64		3.61	6.46	4.09	6.64	4.83
0.332	7.02	-0.0448	0.656	0.804		2.4	4.21	2.09	3.34	2.79		3.66	6.82	3.22	7.5	5.27
0.974	4.69	-0.258	0.316	-1.21		2.76	4.6	-0.261	4.67	2.91		4.15	6.11	3.17	7.27	6.68
0.516	4.27	-0.0839	0.498	-1.41		2	4.88	0.726	5.41	3.4		3.84	7.55	3.94	6.91	5.71
0.329	3.81	0.0852	0.5	-1.19		2.23	4.31	1.44	2.52	2.16		4.4	7.8	3.58	5.78	6.45
-0.0859	6.54	-0.195	-0.929	-0.383		2.92	4.56	1.48	5.41	2.51		3.77	7.1	3.28	7.99	4.74
0.396	7	-0.269	0.588	0.329		2.28	4.34	1.94	4.92	-0.202		3.9	6.78	2.58	6.13	5.3
0.347	5.05	-0.512	-2.02	0.899		1.02	4.21	-0.185	3.94	1.69		3.43	6.07	2.53	7.74	4.1
1.91	3.88	-0.767	-1.31	0.673		2.11	3.64	1.34	5.05	0.715		3.32	5.55	3.44	6.15	5.2
2.7	4.97	-0.588	0.141	-0.256		1.43	3.63	-0.00574	4.71	1.64		3.53	5.1	3.59	6.94	4.44
2.75	4.86	-0.4	0.415	0.701		2.07	4.07	0.467	4.57	0.354		3.61	4.54	3.97	7.28	5.51
2.23	4.38	-1.02	-0.0337	-0.198		1.59	4.03	0.622	3.17	1.77		4.05	5.54	3.49	7.92	6.23
2.06	7.74	-0.0227	-0.631	0.797		2.31	3.63	1.7	4.56	1.31		3.65	5.61	3.53	8.2	3.49
1.88	7.02	-0.968	-0.716	-0.721		3.18	4.36	1.35	3.32	2.53		3.43	6.37	3.46	8.55	2.71
1.73	4.69	-0.523	-1.34	1.12		1.3	4.09	1.15	3.5	3.32		3.84	6.54	3.88	6.47	5.22
2.42	2.98	-1.51	0.994	-1.53		2.04	3.36	0.665	2.89	2.51		3.96	6.65	3.19	7.29	5.25
2.45	4.73	-1.72	-0.331	0.0492		2.92	4.42	0.511	2.53	1.13		3.48	6.71	3.36	8.46	7.31
1.86	4.27	-1.72	-0.331	0.363		3.01	3.54	0.00683	3.17	2.78		4.12	7.91	2.87	7.72	5.86
0.809	2.97	-1.92	0.398	-2.65		2.44	3.9	0.807	5.02	2.37		4.08	8.18	3.24	6.22	5.18
1.34	3.31	-1.19	-0.432	-1.66		1.91	3.54	0.221	4.72	2.02		3.81	8.08	3.24	4.57	4.84
1.27	3.68	-1.37	0.826	1.06		1.56	3.26	1.25	3.78	0.997		3.74	7.85	3.95	5.8	4.87
1.24	1.89	-1.37	2.06	0.989		2.2	3.11	0.95	3.12	-0.46		3.84	8.35	3.17	5.85	5.88
0.502	3.44	-1.32	0.35	1.42		1.38	4.35	-0.157	3.72	1.87		3.39	7.56	3.05	5.87	4.9
1.06	3.58	-1.46	2.96	0.906		1.63	3.52	-0.569	5.16	0.147		3.55	8.19	3.34	7.38	5.2
-0.145	3.09	-1.93	1.34	-0.497		1.53	3.76	0.218	1.7	1.84		4.5	7.36	2.95	8.35	5.4
1.03	3.07	-1.87	2.22	0.576		1.84	3.98	0.618	3.26	2		3.98	7.04	2.62	5.94	6.55
1.63	2.21	-1.85	1.6	-1.04		1.85	3.02	-0.812	5.76	1.11		3.95	6.68	3.15	7.06	7.78
1.79	3.01	-1.85	-0.96	2.83		0.712	2.2	1	3.66	3.55		4.38	6.93	3.42	6.19	4.51
2.33	2.69	-1.48	-0.614	0.85		1.08	3.16	0.461	3.75	1.96		4.39	7.98	3.24	6.57	6.59
2.03	1.92	-2.19	-0.426	0.876		1.22	3.33	-0.272	2.79	2.67		4.02	9.15	3.09	8.54	5.76
2.36	3.04	-2.01	-1.08	2.45		1.32	3.08	-0.198	2.91	1.11		4.34	8.73	4.47	4.91	6.95
1.93	1.29	-1.4	-0.029	0.724		0.715	3.02	0.71	3.86	1.07		3.91	8.58	5.58	5.1	6.39
2.11	1.84	-1.59	1.35	1.49		0.717	2.88	0.0755	4.19	1.61		3.53	8.27	4.73	7.54	5.23
1.9	2.86	-1.53	-0.312	-0.911		2	3.29	0.0844	4.07	1.24		3.8	7.93	5.19	8.54	5.6
1.03	3.1	-1.76	-0.489	0.276		1.38	4.5	-0.248	4.04	3.12		2.84	7.56	4.97	6.59	5.37
2.2	2.62	-1.55	0.202	-0.39		1.77	3.42	0.361	4.15	1.73		3.98	7.99	4.95	7.76	5.31
2.08	4.4	-1.71	0.266	0.295		1.33	3.88	-0.983	5.34	1.37		3.53	7.58	5.19	7.68	4.09
2.28	4.18	-1.82	0.569	0.224		2.57	3.36	-0.648	4.3	0.925		4.01	7.19	6.03	7.84	5.99
2.97	1.16	-1.74	0.344	-0.435		2.47	4.45	-0.639	5.98	0.903		3.57	6.93	7.25	6.98	5.34
2.82	2.96	-0.816	1.01	0.147		2.69	3.14	-1.58	4.59	1.34		3.65	7	7.84	5.94	4.89
3.4	2.19	-0.685	0.855	0.428		2.01	3.84	-1.1	3.74	2.37		3.95	5.94	8.47	6.76	6.42
2.34	3.48	-0.247	0.189	0.84		1.47	4.41	-0.486	5.2	2.98		3.63	6.06	8.08	6.29	7.47
2.63	2.14	-0.263	0.456	-0.742		1.01	4.57	-1.63	4.08	2.24		3.59	7.53	8.13	7.29	7.33
2.55	2.64	-0.54	0.63	0.292		1.11	3.39	-0.466	3.92	1.48		3.48	6.39	8.88	6.85	5.39
2.06	1.76	-0.709	-1.8	-0.0455		2.12	4.02	-0.662	3.8	0.0848		3.65	7.18	8.97	7.86	6.64
2.25	0.428	-1.26	0.965	-0.362		1.12	4.86	0.24	5.28	-1.55		3.64	7.24	8.72	7.68	5.42
1.48	2.16	-1.68	0.159	0.34		0.759	4.45	-0.0397	4.28	0.42		3.22	8.03	8.96	7.24	5.15
0.914	0.918	0.00473	2	0.666		0.858	4.07	-0.677	4.52	1.93		3.08	7.83	9.76	5.95	6.5
1.83	0.978	-0.783	2.83	0.0847		1.22	3.38	-1.71	3.36	1.98		2.39	9.26	9.29	5.27	6.81
2.46	1.94	-0.0134	1.39	0.123		1.72	4.72	-1.18	3.86	0.653		4.35	6.85	9.23	5.13	7.29
2.43	3.69	-0.318	-0.761	-0.997		2.15	4.06	-1.06	4.71	0.38		3.23	6.22	8.77	4.2	6.41
3.34	2.93	-1.19	1.61	-0.662		2.43	3.82	-2.01	3.7	0.464		3.56	6.56	7.95	6.43	6.1
2.08	2.43	-1.05	1.7	-0.226		1.32	4.05	-1.05	5.74	1.78		4	6.39	7.35	5.68	8.01
1.28	2.35	-0.793	1.85	0.666		1.4	4.45	-1.47	5.65	0.847		4.04	8.03	6.98	5.59	7.04
1.23	2.8	-0.444	1.15	0.533		1.57	3.5	-0.711	3.02	1.53		4.47	7.04	7.19	7.38	5.75
1.32	1.54	-0.485	0.903	1.01		2.07	2.11	-1.17	3.34	0.0107		3.77	6.79	7.29	4.48	6.65
1.24	2.48	-0.655	1.63	-0.06		0.498	2.71	-1.11	3.16	1.1		3.71	7.93	7.63	6.16	6.36
1.02	4.07	-0.947	1.61	1.07		1.97	1.98	-1.81	3.99	1.45		3.59	7.94	8.58	7.01	5.91
1.14	2.74	-0.912	0.903	-0.804		1.55	1.39	-3.18	4.44	1.4		3.39	8.17	9.36	6.25	5.45
0.694	3.12	-0.765	0.578	1.09		2.14	2.07	-2.72	4.78	1.51		3.32	7.93	8.49	7.19	6.38
0.404	1.88	-1.22	-0.342	0.987		1.09	2.27	-0.593	3.26	1.26		3.16	8.32	8.95	7	5.62
0.124	2.79	-0.714	1.86	-0.16		2.31	1.51	-2.24	2.89	1.38		3.65	7.51	9.16	3.81	7.32
0.559	3.87	-0.629	1.5	-0.0699		1.48	1.56	-2.05	3.92	2.25		3.97	8.34	9.87	4.26	6.4
0.45	1.68	-1.07	2.31	0.694		1.38	2.14	-0.379	4	1.17		2.84	8.31	9.73	6.86	5.88
0.836	2.11	-1.56	1.38	1.49		2.08	2.7	-1.05	3.45	0.922		3.51	8.22	10.2	5.23	5.3
0.978	3.43	-1.07	1.87	0.798		1.9	2.42	-1.85	3.12	1.23		3.67	8.22	9.93	7.65	5.63
0.686	2.45	-1.21	0.985	0.229		1.35	1.98	-1.45	4.57	1.62		3.25	8.14	8.46	6.78	4.34
0.306	1.36	-0.968	0.35	0.668		2.04	1.99	0.168	3.01	2.24		3.21	6.05	7.94	3.86	4.77
-0.163	3.48	-0.536	-0.445	0.99		1.65	1.46	-1.41	1.6	2.88		2.57	7.32	8.61	4.48	7.41
-0.146	4.27	-1.06	1.6	2.59		0.971	1.76	-1.28	5.37	1.19		3.46	7.37	9.04	4.56	7.68
-0.136	3.89	-1.37	2.19	-0.5		1.06	1.88	-1.05	2.67	1.33		3.84	6.17	8.66	6.44	6.68
-0.365	3.27	-0.856	-0.483	0.439		1.33	1.71	-1.14	2.48	0.94		3.05	6.86	7.76	3.98	6.66
-0.373	2.6	-0.942	1.07	1.12		1.79	1.1	-0.518	5.26	0.179		3.16	6.26	8.39	5.83	6.24
0.337	1.55	-0.996	-0.472	2.26		2.14	1.39	-1.58	4.47	0.509		2.63	8.35	8.26	3.35	6.05
0.349	1.68	-0.892	2.25	0.236		1.64	1.78	-1.19	4.35	2.09		2.41	7.22	8.05	5.09	6.58
0.202	2.19	-1.1	0.19	-0.401		0.85	1.69	0.287	3	1.69		2.63	7	7.92	7.25	5.46
-0.215	2.47	-0.906	0.837	1.6		1.55	1.44	-0.0323	3.22	2.1		2.99	7.5	7.21	6.01	6.94
0.71	0.95	-1.15	0.323	1.12		1.21	1.58	-0.153	4.72	0.396		2.68	6.41	7.27	4.66	6.23
0.469	0.104	-0.847	1.96	1.03		1.29	2.58	-0.43	2.75	0.173		3.66	6.53	7.35	4.71	7.72
-0.238	2.29	-1.46	0.868	-0.482		1.95	1.98	0.166	2.94	1.86		3.05	7.04	7.82	5.16	5.08
-0.182	0.519	-0.892	0.906	1.7		1.61	0.98	0.219	0.34	0.252		3.18	8.08	6.67	6.74	5.35
0.0468	0.915	-0.806	0.903	0.788		1.4	1.57	-0.115	1.43	0.443		3.26	8.87	7.18	4.84	5.8
0.57	0.444	-0.523	1.04	1.6		1.68	1.44	0.373	0.25	-0.0575		3.58	7.49	7.45	4.17	5.98
0.0919	-0.166	-0.555	0.607	-1.04		2.16	1.26	-0.493	3.72	0.744		4.09	7.52	7.61	4.49	5.91
0.867	0.0363	-1.05	0.999	0.731		1.77	0.583	-1.11	4.88	0.513		2.99	8.07	6.95	5.06	5.47
-0.362	2.25	-1.16	0.0538	2.1		1.56	0.0665	-0.63	3.93	0.734		3.16	7.86	5.97	4.78	7.42
-1.01	2.68	-1.08	1.76	0.465		1.31	0.767	-0.796	4.66	-0.229		3.28	8.13	5.51	6.2	5.35
-1.27	0.629	-0.287	0.8	1.66		0.935	0.375	0.236	3.88	1.02		3.77	8.38	5.66	5.64	7.44
-1.71	2	-0.265	1.73	0.0437		2.03	1.12	-0.19	4.2	1.25		3.2	8.01	5.93	6.05	6.55
-0.319	0.586	-1.26	1.07	1.11		1.96	1.22	-0.812	2.12	1.97		3.04	9.87	5.85	5.45	7.34
-0.192	-0.165	-0.97	0.0498	0.456		1.75	1.38	-1.35	4.18	1.16		3.49	9.18	5.19	4.31	7.46
-0.774	-0.471	-1.09	1.73	-1.09		1.87	0.88	-0.396	3.45	0.908		2.54	8.07	6.27	3.7	7.18
-0.667	0.849	-1.59	-1.09	0.683		2.16	0.454	-1	2.83	0.718		2.83	9.47	5.67	4.1	8.69
-0.934	2.12	-2.19	0.818	0.903		2.06	0.864	-0.296	2.83	0.57		2.14	9.04	4.17	5.17	7.08
-1.56	0.268	-1.99	-1.06	1.48		2.21	0.72	-1.13	2.66	0.0162		2.91	8.3	5.79	4.19	9.16
-1.24	2.37	-1.35	1.54	1.09		1.36	0.765	-1.44	4.21	2.28		3.26	8.98	6.21	4.77	6.18
-0.911	0.459	-1.45	1.67	0.153		1.39	1.54	-0.625	3.18	1.29		2.77	8.98	6.5	6.4	8.21
-0.561	2.48	-1.12	0.0264	1.25		1.85	1.4	-0.486	5.36	1.47		2.54	8.97	5.6	6.61	8.64
-0.427	2	-1.1	0.769	-1.8		1.9	1.42	0.341	4.23	0.715		3.21	8.5	5.42	5.6	7.31
-1.01	2.69	-1.03	-0.353	-1.57		2.16	1.11	-0.00921	3.55	0.234		2.65	8.45	5.98	4.7	7.94
-0.175	1.4	-0.947	1.33	-0.776		0.706	1.09	-1.11	2.67	-0.59		2.52	8.69	6.57	4.71	7.92
-0.384	1.9	-1.83	0.2	0.34		0.972	1.19	-1.74	3.98	-0.0064		2.84	8.4	5.82	5.1	9.54
-0.399	0.141	-1.17	3.23	0.242		1.5	1.53	-2.65	2.4	-0.245		3.04	8.51	4.91	5.57	7.86
0.254	1.67	0.146	0.548	0.906		1.62	1.63	-1.54	3.84	-0.343		3.65	9.07	3.92	5.31	5.83
0.615	2.05	-0.177	0.278	1.7		1.68	2.77	-1.83	5.86	1.82		3.14	7.92	4.17	4.58	8.75
0.447	0.503	-0.708	-0.664	-1.29		0.941	1.94	-2.25	4.14	1.79		4.08	8.43	4.06	3.47	7.98
0.791	2.56	-0.885	1.53	-0.491		0.422	2.86	-2.39	3.68	0.928		3.53	7.36	4.89	2.24	9.2
1.53	3.34	-1.05	0.154	1.48		1.8	3.5	-1.7	2.49	0.525		3.39	8.92	5.55	4.77	7.54
0.382	4.05	-1.38	0.319	-0.277		2.89	2.3	-2.63	2.5	2.97		4.16	8.04	4.88	4.42	8.8
0.324	3.57	-1.32	-0.283	-0.371		1.96	2.43	-3.92	3.02	0.57		4.48	9.58	3.45	4.65	7.25
1.07	2.25	-1.09	-0.305	0.0516		-0.291	1.35	-2.52	2.85	-0.339		4.77	8.44	2.28	3.31	8.64
0.817	3.74	-1.38	1.38	0.839		0.659	2.36	-2.09	3.33	1.85		4.57	8.51	2.35	4.91	8.46
0.371	3.49	-0.919	1.6	0.144		1.44	2.11	-2.34	2.93	1.5		4.65	8.26	2.18	4.67	9.15
0.778	4.24	-1.54	0.462	0.291		1.21	2.37	-2.03	5.13	0.226		4.32	7.77	2.04	3.36	7.84
0.0124	3.96	-1.56	0.676	-1.31		0.848	2.21	-2.52	4.4	0.475		4.33	7.94	2	5.51	8.65
0.787	2.43	-2.16	0.328	1.97		1.96	2.72	-2.61	4.08	0.598		4.02	8.82	2.48	2.7	8
0.0998	3.79	-1.94	0.998	-0.855		1.8	0.9	-2.79	4.5	0.772		4.64	8.58	2.67	2.93	8.48
0.166	3.04	-2.54	2.12	-1		0.875	2.52	-1.87	3.05	0.608		3.93	9.23	3.65	5.08	7.87
0.0278	2.41	-2.47	0.449	-1.75		0.873	0.967	-1.22	3.71	-0.0884		3.6	9.51	4.27	5.44	6.95
-0.201	2.83	-1.97	0.189	-0.763		1.4	2.22	-2.31	3.13	0.964		3.53	9.32	3.51	4.22	7.23
-0.294	2.52	-2.32	-0.646	-1.85		0.718	1.86	-2.73	4.58	0.723		3.87	8.56	3.3	4.57	6.96
-0.147	2.31	-1.95	0.0566	1.29		1.53	1.55	-2.76	4.58	1.9		4.34	9.64	3.14	4.07	9.51
-0.279	0.829	-1.49	-1.21	-0.675		1.8	1.74	-0.557	2.54	0.639		4.18	8.21	2.63	6.16	6.92
-0.0618	1.51	-2.49	0.461	-1.53		1.84	1.22	-0.789	3.33	2.85		3.63	8.79	4.26	5.61	7.52
-0.266	0.862	-2.09	0.945	-2.31		1.34	1.35	-1.05	2.1	1.44		3.93	8.32	4.86	5.56	8.09
-0.464	1.97	-2.08	-0.719	-1.23		0.669	1.17	-0.977	3.58	2.33		4.27	8.38	5.38	3.84	8.69
-0.331	0.718	-2.06	1.31	0.192		1.14	1.43	-1.3	3.05	-0.532		3.99	7.99	5.43	4.81	8.4
-0.62	2.56	-1.36	1.57	-3.22		0.706	1.36	-0.947	1.6	0.138		4.1	6.23	6.9	3.65	8.79
-1.03	1.2	-0.931	1.72	-1.45		-0.179	1.62	-0.673	3.25	0.567		4.08	6.39	6.71	4.98	6.65
-1.18	2.28	-0.0929	2.11	-0.385		0.228	0.493	-1.08	2.43	2.23		4	7.27	6.83	3.58	6.7
-0.944	3.02	0.0455	2.54	-0.368		1.12	-0.0325	-1.77	3.56	0.629		3.61	7.51	7.69	5.5	6.78
-0.4	0.971	0.438	-0.0223	-1.04		0.629	0.758	-0.704	1.64	-0.000721		3.47	8.05	7.53	3.91	8.36
-0.528	2.11	0.0469	-0.0644	0.729		0.525	1.25	-0.839	3.83	1.92		3.28	6.85	6.46	3.86	5.25
-0.404	0.509	0.239	0.184	-1.19		0.963	-0.227	-1.03	3.16	1.83		3.33	7.57	6.58	3.4	7.23
-1.13	-1.57	0.151	0.315	0.0178		1.18	1.36	-1.51	3.04	1.15		3.7	7.46	7.17	5.22	4.71
-1.16	0.44	0.565	1.26	-2.79		0.733	0.756	-1.77	2.76	2.4		2.87	8.27	7.1	4.17	7.44
-1.33	0.0861	0.407	1.39	-0.547		1.02	0.551	-1.84	2.34	-0.46		2.56	8.43	7.06	3.4	6.1
-1.26	1.6	1.22	-0.287	-1.02		1.08	0.305	-0.246	2.93	0.709		2.78	8.46	6.61	4.09	7.49
-1.43	1.96	0.847	1.71	-1.44		1.35	1.4	-1.12	1.51	0.0724		2.48	8.6	8.03	3.95	7.88
-0.985	2.57	0.976	-0.944	-1.74		0.145	1.89	-1.32	3.73	-0.734		2.49	10.1	6.92	3.02	7.65
0.37	-0.43	1.01	1.11	0.449		1.22	0.997	-1.53	4.14	0.226		3.06	10.5	7.25	4.07	7.69
-0.0458	0.173	0.677	1.73	1.16		1.02	0.993	-1.46	2.5	-0.747		3.58	10.3	6.85	4	7.59
-0.513	1.13	1.46	0.253	-0.787		1.56	1.37	-2.06	3.62	2.41		3.67	9.58	5.63	4.98	8.23
-0.125	0.988	1.5	0.777	-0.846		1.21	1.6	-2.37	5.58	0.0223		3.11	8.81	4.59	5.43	8.86
0.574	1.02	1.67	0.924	1.58		0.405	2.09	-1.8	3.92	1.33		3.46	7.32	4.19	5.3	6.59
-0.00829	1.69	0.896	0.563	0.847		0.832	1.14	-2.74	2.79	0.155		3.58	7.16	4.97	3.97	7.42
0.168	0.761	1.69	0.531	-1.8		0.377	1.51	-1.79	3.4	-0.0714		2.96	7.09	4.18	5.37	6.71
0.428	0.118	1.84	0.906	-1.48		1.32	1.55	-1.04	3.41	1.32		3.33	7.16	4.61	5.32	9
1.33	0.272	1.3	-0.787	-1.42		0.111	1.24	-1.02	4.08	-0.229		4.16	7.34	4.26	3.55	8.05
1.79	1.37	1.84	1.01	-0.171		1.32	1.82	-0.756	3.72	0.867		4.33	7.15	3.67	4.94	8.59
1.32	0.656	2.48	-0.353	-0.943		1.69	1.98	-1.39	3.28	0.000116		3.87	6.1	4.33	4.8	7.69
1.43	-0.267	1.64	0.987	-1.62		1.41	1.14	-1.21	1.85	1.4		4.01	6.27	3.4	5.25	6.54
1.38	1.1	1.27	-0.608	0.204		0.958	1.83	-2.04	2.33	1.75		3.74	6.41	2.96	3.71	6.21
1.07	0.574	1.1	-0.242	-1.43		1.64	1.12	-0.58	1.92	1.02		4.08	6.84	2.95	3.77	5.74
0.974	2.08	1.01	1.42	-1.17		-0.198	1.98	-1.15	2.93	0.771		3.88	6.53	4.14	4.61	5.5
0.96	1.87	1.32	0.121	-0.775		0.839	1.99	-1.76	4.24	1.45		4.05	8	4.44	4.25	7.49
0.0443	0.449	1.05	-0.591	-2.48		1.53	2.3	-1.21	3.63	1.99		3.85	7.39	5.08	2.96	6.06
0.265	1.47	1.42	1.13	0.817		0.281	2.02	-0.615	2.1	1.67		3.59	7.26	4.56	3.36	6.77
0.638	2.93	0.513	1.71	-0.493		0.945	2.19	-1.19	3.42	1.38		3.35	6.69	3.73	5.36	7.01
0.613	3.51	1.09	1.19	-1.22		0.767	0.866	-0.461	1.31	-0.112		2.94	6.5	4.65	4.45	5.57
0.341	4.62	1.02	1.87	-1.79		0.209	1.54	-1.26	2.3	-0.88		3.2	6.68	4.71	4.53	6.41
1.22	4.64	1.39	1.57	-3.28		-0.125	0.826	0.219	1.41	-0.807		3.07	7.5	5.08	5.01	5.48
0.81	3.59	1.76	-0.966	0.345		0.933	1.85	-1.03	2.65	2.68		3.1	7.43	5.53	4.98	4.44
1.44	4.65	1.33	0.136	-0.492		0.766	0.929	-1.1	1.1	-0.327		2.92	7.84	4.5	4.63	5.75
1.07	4.12	1.42	1.41	-0.909		1.54	1.18	-1.36	2.86	-0.137		3.06	6.92	5.45	3.16	5.79
1.11	3.91	2.36	-1.1	-0.403		0.701	0.971	0.00768	2.01	0.78		2.6	6.98	4.37	2.56	5.65
1.34	4.49	2.69	1.31	-0.497		1.04	1.13	-1.06	1.87	-0.744		3.45	6.57	4.48	4.12	3.61
0.774	6.12	1.3	2.67	-1.16		1.27	0.0123	-1.17	2.55	-0.642		4.76	6.27	4.13	5.79	4.37
1.06	4.12	1.9	2.36	0.348		1.98	0.745	-1.18	4.18	0.932		4.62	5.67	3.77	6.08	7.41
0.718	4.86	2.57	0.855	0.362		2.05	0.64	-0.578	1.42	1.23		3.78	6.25	4.11	3.32	4.34
1.21	2.46	2.19	-1.11	1.45		2.17	1.02	-1.67	4.6	-0.00163		4.31	6.94	5.17	3.64	3.87
1.1	5.29	1.74	1.21	-0.173		0.966	0.974	-0.264	4.02	-0.897		3.59	6.64	4.6	4.87	3.4
1.26	3.5	1.77	-0.032	0.0921		1.7	0.148	-0.314	4.88	1.52		3.9	5.69	4.48	3.06	6.07
0.457	4.88	2.93	0.549	-0.193		2.58	-0.141	0.146	4.98	-0.588		3.42	6.04	2.99	5.42	5.14
1.28	3.43	2.01	2.21	-0.886		1.67	-0.26	-0.0155	3.81	0.571		3.51	6.15	2.62	4.98	5.85
1.58	2.2	1.96	1.21	-1.8		0.357	1.01	-0.221	3.15	-0.328		3.81	6.9	2.88	3.34	5.49
0.301	4.87	2.34	0.728	-0.808		1.5	1.82	-0.132	2.7	0.539		3.97	7.19	3.54	3.89	6.52
-0.0527	3.66	2.1	0.986	0.985		1.8	2.55	-0.88	4.22	-0.757		3.57	6.77	2.51	5.15	6.28
0.42	3.53	1.51	2.11	-2.32		1.61	1.31	-0.545	2.61	1.42		4.07	6.97	3	3.04	4.48
1.17	3.4	1.41	1.38	1.12		0.157	0.77	-0.882	3.12	-0.544		3.63	7.92	2.36	5.11	5.86
0.602	2.88	2.34	0.743	-0.346		1.33	0.457	-0.693	2.96	-0.187		4.82	7.25	1.85	1.75	3.63
1.22	3.81	1.54	1.94	1.85		0.652	0.382	0.284	1.3	-0.415		5.41	7	2.01	4.74	3.87
0.96	2.32	1.39	2	1.24		0.882	1.24	0.636	1.56	1.17		5.85	6.04	2.14	6.39	4.27
1.01	3.88	2.02	1.51	-1.15		0.717	1.46	0.271	2.41	0.568		5.35	5.23	2.51	3.86	3.56
1.51	4.2	1.88	0.808	2.3		0.682	2.77	1.1	3.5	-0.0584		4.82	5.28	2.95	5.13	7.08
1.39	2.43	1.22	1.84	0.546		-0.219	0.313	1.23	1.71	0.0938		5.19	6.3	2.27	5.37	4.8
1.61	3.6	1.69	2.39	0.103		1.31	0.19	0.194	3.1	-0.291		4.59	6.42	1.57	3.58	3.55
1.5	3.61	1.59	2.16	-0.554		-0.0701	1.11	0.506	1.88	1.08		4.8	5.4	1.63	3.01	5.64
1.46	4.28	1.64	0.639	1.04		-0.431	0.76	0.482	3.15	1.05		4.25	6.24	0.908	5.22	4.51
1.84	2.8	2.01	0.16	0.522		0.0688	1.41	0.162	2.37	1.43		4.61	6.5	0.979	3.17	3.97
1.62	4.21	1.3	1.33	-0.131		0.577	2.49	0.209	3.41	0.203		6.1	6.05	1.3	4.16	3.67
1.19	3.28	2.05	1.01	-1.37		-0.264	1.78	0.411	2.97	0.2		5.01	5.44	1.27	4.3	5.35
0.709	4.09	1.6	0.709	2.08		0.0248	0.486	-0.145	2.67	1.07		3.8	6.69	2.37	5.4	5.14
0.28	2.71	1.95	0.841	0.448		1.63	0.0236	-1.51	2.97	1.1		3.36	6.03	1.25	3.96	5.44
-0.456	2.43	1.99	-0.326	0.519		-0.34	-0.0168	-1.4	1.74	1.56		2.44	6.1	-0.169	4.41	5.82
-0.0707	5.29	1.84	1.39	1.57		0.00807	1.83	-0.898	-0.364	0.152		2.77	6.39	1.63	2.79	5.7
-0.414	3.59	2.12	0.527	2.63		0.115	1.57	0.00787	4.33	-0.724		3.22	5.84	0.5	6.48	3.13
-0.0447	5.33	2.1	1.73	1.89		-0.077	2.42	-0.469	1.62	0.705		3.99	5.66	1.07	3.68	3.56
0.282	4.29	1.54	0.934	1.02		-0.246	0.658	-1.4	3.53	0.609		2.99	5.77	1.77	3.91	3.42
-0.425	5.19	1.32	0.0444	2.2		0.247	1.11	-2.75	3.44	0.00691		2.88	6.23	1.74	3.71	4.8
-1.14	5.2	1.94	0.206	0.0822		-0.434	0.619	-1.63	3.35	0.682		1.31	5.01	1.45	3.21	5.43
-1.13	5.72	2.52	0.548	-0.414		0.804	0.944	-2.07	3.5	0.701		1.23	3.97	1.48	5.02	5.56
-0.984	6.49	2.24	1.72	-0.0554		0.258	1.75	-1.43	3.83	-0.755		1.58	4.78	1.12	4.37	3.59
-0.264	5.75	2.44	0.0673	1.3		1.41	3.81	-1.06	2.81	-1.35		1.97	4.51	1.09	5.55	5.38
-0.781	5.06	1.85	1.05	-0.527		0.911	4.16	-0.135	4.22	-0.0671		2.48	5.17	1.46	2.29	4.73
-0.778	5.32	3.23	1.97	0.935		0.61	4.72	-2.62	2.39	0.732		2.85	4.53	1.34	4.94	6.63
-1.34	4.33	2.06	0.603	-0.299		1.74	3.89	-2.45	3.6	1.65		2.34	4.81	1.84	4.25	3.97
-1.07	5.99	1.99	0.659	1.72		0.903	2.93	-1.84	3.03	-0.417		1.78	5.7	2.16	4.36	4.3
-1.42	5.37	2.05	-0.0701	0.678		0.22	2.07	-2.42	4.5	0.805		1.23	6.38	2.6	2.62	6.5
-0.783	6.05	2.04	1.55	-0.3		1.39	2.92	-2.42	2.13	1.36		1.4	6.51	1.26	3.14	4.97
-1.54	6.89	3.09	0.936	0.142		0.978	2.12	-2.13	4.38	-0.119		1.16	7.52	1.62	4.72	4.2
-1.41	7.15	3.18	-0.0606	1.25		1.07	3.09	-1.48	2.26	-0.624		1.86	6.37	1.15	4.43	5.57
-1.64	7.36	3.75	0.698	-0.102		1.16	2.02	-1.23	2.26	2.86		3.62	5.97	1.93	1.5	4.19
-1.2	8.57	2.82	0.475	1.49		-0.331	2.93	-0.751	2.68	0.661		3.27	5.9	1.8	3.22	5.98
-2.15	7.36	2.06	1.3	0.105		0.029	2.7	-1.92	2.12	-0.982		3.28	5.78	2.04	4.96	5.11
-2.37	5.22	3.17	0.874	1.37		1.22	1.55	-1.38	3.8	1.33		2.9	6.49	1.77	4.64	6.74
-2.9	5.81	2.89	2.16	-0.542		0.366	1.81	-0.258	0.821	-0.791		2.39	6.51	1.32	5.09	5.89
-1.86	7.71	2.78	1.25	2.12		0.124	1.4	-1.22	3.84	0.971		2.48	6.56	1.54	3.68	4.49
-1.69	7.31	3.64	1.58	0.218		0.929	1.24	0.201	2.64	-0.171		2.56	6.13	1.84	5.73	3.64
-2.04	7.75	3.08	2.14	0.574		0.668	0.956	-1.25	2.77	0.697		2.28	5.55	1.58	3.03	3.84
-1.78	6.01	3.2	0.227	-0.566		-0.164	1.71	-0.842	2.71	-0.655		3.08	4.22	0.422	4.57	4.05
-2.31	6.1	3.29	1.49	-0.32		-1.11	1.57	-1.52	3.21	-1.36		3.5	5.13	-0.29	2.7	3.72
-2.29	6.95	3.37	2.08	1.35		-0.518	0.867	-1.11	2.57	-0.798		3.1	4.72	0.459	3.84	4.95
-2	5.17	3.65	0.995	0.627		-0.361	1.19	-3.17	1.75	1.7		3.18	5.24	1.06	2.75	3.42
-1.26	4.21	3.62	1.7	1.22		0.467	0.932	-2.64	1.27	-0.418		1.99	5.34	0.839	5.85	5.21
-1.83	6.98	3.97	-0.16	0.542		0.379	0.975	-0.238	2.56	-2.38		2.64	4.79	0.919	2.55	2.44
-2.04	6.17	3.39	0.729	0.22		-0.193	1.51	-1.18	3.35	-0.746		2.45	5.82	1.54	5.14	4.35
-1.6	5.12	3.32	0.809	0.387		-0.119	1.51	-1.12	2.67	0.591		2.29	5.71	0.947	4.84	3.31
-2.67	5.43	2.68	1.14	0.84		0.329	1.78	-1.77	2.46	-1.12		1.98	4.9	0.806	3.21	4.71
-2.61	4.41	1.59	1.24	2.62		-0.125	0.798	-1.06	2.43	-0.635		2.28	5.38	1.09	3.3	5.08
-2.29	6.04	2.08	-0.0724	1.08		0.0392	0.648	-1.81	1.96	-0.658		1.63	4.93	1.08	1.83	2.35
-2.02	4.55	2.04	1.58	1.77		-0.474	1.46	-0.279	0.125	-1.09		0.655	5.54	0.467	5.61	3
-2.01	3.77	1.22	0.021	0.659		-0.87	2.11	-0.337	2.29	-0.966		1.45	6.81	1.48	4.18	2.4
-1.81	4.94	1.98	-0.307	0.39		0.593	1.81	-1.48	1.16	0.114		0.111	8.11	0.92	2.26	4.28
-2.27	4.86	1.82	0.771	1.24		-0.0175	2.35	-0.198	3.08	0.464		1.59	7.23	1.37	2.47	1.55
-2.59	5.12	2.14	0.749	1.79		0.0227	1.63	-1.29	2.08	-0.36		1.58	5.28	1.06	2.44	4.54
-1.55	3.46	2.59	1.24	4.21		0.00491	1.31	-0.626	2.14	-0.212		1.85	4.04	0.599	3.65	4.66
-1.89	3.78	2.2	0.0119	1.62		0.667	0.554	-2.03	2.2	-0.712		1.5	4.13	0.258	4.03	2.83
-1.79	4	2.08	0.51	2		0.155	-0.11	-1.5	2.02	0.292		1.31	5.51	0.217	3.27	4.09
-2.42	6.34	1.93	0.0719	0.905		-0.78	-0.0199	-1.67	3	0.461		1.25	4.89	-0.414	2.8	2.69
-1.99	4.63	2.14	-1.04	2.86		0.647	0.762	-2.59	2.54	-0.514		0.753	4.37	0.0423	4.86	1.84
-1.96	4.26	2.46	-1.82	3.1		-0.722	-0.148	-1.94	3.87	-1.19		2.27	5.16	0.0781	3.6	2.72
-1.29	4.25	3.02	0.864	3.13		-0.733	0.12	-1.43	3.03	0.574		2.28	5.16	0.265	2.56	2.86
-2.23	3.6	2.73	0.984	-0.202		-0.603	0.0258	-1.45	2.99	-1.28		2.14	4.76	0.229	3.72	2.42
-1.7	3.16	2.8	1.49	0.612		-0.124	0.546	-2.9	1.99	0.0163		1.47	4.39	0.275	2.6	3.72
-1.53	3.99	3.46	-2.15	1.13		-0.386	0.91	-1.5	1.01	0.747		2.34	4.46	0.363	2.34	3
-1.59	5.13	2.77	-1.3	3.06		-0.137	0.431	-1.1	3.55	-0.901		1.94	4.32	0.645	4.33	2.2
-1.55	4.23	3.34	-2.28	2.61		0.49	1.01	-1.75	3.02	0.393		1.79	5.34	1.35	3.16	2.86
-2	3.43	2.6	-1.42	1.76		-0.957	1.44	-1.54	2.22	0.796		2.87	5.63	1.66	3.03	3.33
-1.31	2.43	2.79	-1.66	0.528		-1.12	1.11	-1.44	2.8	0.647		2.04	4.62	0.948	3.4	4.71
-1.87	3.24	2.8	-0.998	1.06		0.00711	1.43	-1.12	1.75	0.0785		1.83	4.12	0.709	1.32	3.7
-2.44	1.51	2.68	-0.466	1.38		-0.532	0.156	-1.16	1.84	0.251		1.56	3.16	0.582	4.91	5.61
-2.07	1.8	2.27	0.705	1.29		-0.383	-0.0654	-1.26	1.82	0.192		2.35	2.48	0.956	4.11	3.5
-1.41	2.78	0.882	0.00149	1.31		0.728	-0.355	-1.43	1.39	0.888		2.15	3.04	0.579	2.67	3.5
-1.78	2.13	1.18	1.69	1.19		0.202	-0.368	-1.91	1.41	1.08		2.4	3.46	0.61	2.88	2.89
-1.82	2.56	0.776	0.41	0.06		-0.861	-0.786	-2.02	2.78	-1.33		2.45	3.59	0.702	1.98	3.67
-1.62	3.34	0.75	-0.581	1.59		-0.69	-0.456	-2.95	3.22	-0.243		2.17	3.85	0.695	1.73	2.62
-1.05	3.1	0.513	-0.126	3.66		-0.768	0.532	-2.57	3.06	-1.02		1.32	3.8	1.05	3.43	3.26
-1.53	3.5	0.13	0.259	1.18		-1.27	-1.03	-2.16	3.2	0.754		2.18	3.76	0.589	4.31	3.29
-0.991	3.97	-0.379	1.4	1.46		-0.181	-0.943	-2.86	4.37	0.662		1.68	3.61	0.499	1.6	5.03
-0.615	3.16	0.473	0.923	0.9		-0.829	-0.853	-2.72	3.73	-1.25		2.1	3.86	1.05	2.05	4.82
-0.32	3.71	-0.353	-0.145	2.23		-1.05	-0.947	-3.02	2.57	-0.664		2.34	2.82	0.326	2.06	5.22
-1.13	1.34	-0.281	-1.94	1.26		-0.678	-1.08	-2.7	0.775	-0.964		1.94	3.7	0.0426	1.29	3.17
-1.04	2.23	-0.913	-1.09	4.06		-1.38	-0.473	-3.28	2.27	-1.18		1.68	3.34	0.102	0.895	5.35
-1.64	2.02	-0.707	0.871	1.95		-0.264	0.107	-1.19	1.43	1.8		2.28	3.13	-0.153	2.17	4.93
-1.26	2.12	-1.18	1.8	1.94		-0.227	0.169	-3.08	1.28	-1.24		1.93	5.43	-0.38	3.97	3.67
-1	0.448	0.0258	-0.476	3.42		-0.217	0.156	-3.07	1.81	-0.747		2.38	3.55	-1.06	2.09	3.46
-1.8	0.829	0.58	-0.51	3.69		-0.812	0.741	-3.42	0.489	-1.43		1.95	3.86	0.113	1.63	2.77
-1.31	3.36	0.367	-0.0203	2.09		-0.443	1.37	-2.88	1.68	-0.767		1.04	2.89	-0.364	0.311	4.01
-1.3	0.333	0.0594	1.25	2.63		-1.35	0.498	-1.9	1.58	-1.26		1.21	3.28	-0.0907	3.14	3.18
-1.55	1.18	-0.224	0.66	1.6		-1.22	1.94	-2.71	2.58	0.223		0.84	2.74	-0.631	2.78	5.72
-1.32	1.47	-0.0414	-0.564	2.6		-0.25	2.01	-3.19	4.01	1.78		1.67	2.3	-0.477	2.16	2.16
-1.56	1.13	-0.0773	-0.939	3.33		-1.2	1.56	-2.64	1.98	0.475		0.879	3.61	-0.419	0.91	3.67
-0.715	1.16	0.389	0.707	4.07		-1.36	1.13	-3.06	0.477	-0.913		1.01	2.07	-1.04	1.25	4.05
-0.804	0.722	0.561	-0.361	2.49		-0.825	1.24	-2.51	2.38	-0.357		2.56	2.1	-0.49	2.01	4.53
-0.26	1.2	0.69	0.499	5.37		-1.65	0.559	-2.25	2.22	-0.024		2.26	2.5	-0.789	1.71	4.66
-0.654	0.134	0.801	0.348	4.65		-1.64	0.715	-2.91	-0.707	2.67		2.24	2.6	-0.348	1.93	3.98
-0.896	2.06	0.742	-1.19	0.773		-0.848	1.37	-3.51	2.07	-0.227		1.74	3.77	-0.228	2.52	2.84
-0.561	1.24	1.72	0.217	4.19		-0.728	0.374	-2.81	1.26	0.384		1.56	4.06	-0.221	2.26	2.46
-0.674	-0.324	1.49	0.671	2.19		-1.51	0.512	-3.29	3.31	-1.81		2.02	5.4	-0.369	3.08	3.38
-0.821	2.72	0.784	-0.15	3.43		-1.83	-0.184	-2.63	3.19	-1.25		1.81	6.01	-0.872	3.47	3.89
-0.89	-0.9	0.734	-0.15	4.16		-1.1	1.2	-1.57	2.23	-0.504		1.37	6.01	-0.224	2.68	4.15
-0.145	1.69	1.04	-0.673	3.41		-1.92	1.33	-1.92	2.67	1.66		1.38	5.14	-1.08	2.46	4.02
-1.09	2.97	0.557	-0.29	1.62		-1.05	1.43	-2.06	0.181	1.43		2.58	4.93	-0.368	4.18	3.58
-0.758	1.77	0.851	-0.196	0.91		-0.89	1.3	-1.55	-0.0648	1.45		3.31	5.13	0.508	3.92	3.89
-1.44	2.15	0.682	-0.141	1.8		-1.61	0.785	-1.77	1.86	-0.446		3.87	5.2	-0.642	1.69	3.3
-0.366	1.79	0.981	0.494	0.743		-1.19	-0.283	-2.21	2.38	0.0514		4.19	5.49	-0.973	0.608	3.97
0.116	2.55	0.35	0.00508	0.773		-1.58	0.94	-2.82	0.487	0.846		4.33	5.8	-1.46	1.93	2.77
0.432	2.24	0.689	-1.38	3.16		-2.24	1.11	-2.69	0.864	-1.05		4.4	5.36	-0.683	2.02	2.68
0.483	3.01	1.09	2.14	1.27		-0.791	1.54	-1.64	1.55	0.815		4.09	4.72	-1.58	2.23	4.56
0.785	2.25	0.846	-0.27	-2.5		-0.941	0.952	-1.38	0.264	-0.493		4.15	3.11	-1.31	2.23	2.88
0.0569	1.18	0.809	-0.61	-1.72		-0.86	1.88	-2.66	1.66	-0.704		3.88	3.94	-1.12	2.25	4.13
-0.0574	2.14	0.864	-0.368	-0.476		-1.49	1.79	-1.36	2.74	0.852		4.35	5.06	-1.01	2.1	3.93
-0.41	1.98	0.666	0.34	-1.03		-0.725	2.68	-1.25	1.65	0.519		4.54	4.29	-1.36	3.55	3.99
-0.861	1.75	0.556	0.347	1.03		-0.28	3.31	-0.764	3.27	-0.569		4.23	3.97	-1.43	2.79	3.69
-1.6	0.736	0.978	0.695	1.36		-0.405	2.51	-2.18	0.449	2.69		4	4.26	-1.93	2.34	5.03
-2.15	0.649	0.741	0.807	0.92		-0.967	2.21	-2.15	1.23	0.407		4.49	3.91	-1.2	2.82	4.6
-1.31	0.668	0.388	0.657	0.423		-0.178	2.59	-1.49	0.298	0.477		4.06	4.56	-2	1.4	6
-1.75	2.19	0.671	-1.35	0.334		0.141	3.27	-2.22	1.98	-0.987		2.71	4.2	-1.49	-0.29	3.89
-1.04	2.38	0.494	1.03	-0.219		-0.527	2.53	-3.36	3.49	1.24		2.58	4.25	-1.18	3	3.5
-0.225	2.08	1.09	0.904	-0.22		-0.716	3	-0.148	0.59	-0.02		1.76	2.98	-0.317	2.64	4.17
-0.497	0.494	1.4	-0.644	-0.606		0.0693	3.42	-1.06	2.32	1.08		2.11	2.79	-0.681	2.95	3.37
-0.375	1.58	1.02	0.728	-0.403		0.0915	2.7	-1.84	1.1	0.619		2.06	1.63	-0.906	-0.895	1.75
-1.12	0.522	1.02	1.94	-1.17		-1.18	3.65	-0.827	3.57	1.02		3.12	2.53	-0.55	1.74	2.85
-0.353	-0.104	1.05	0.265	-1.71		-0.167	1.34	-1.21	1.58	0.709		2.95	3.2	-0.7	1.76	2.74
-0.165	0.656	0.356	-0.927	-0.417		-0.608	2.31	-2.26	3.24	0.554		2.26	2.56	-0.697	1.19	3.6
-0.524	0.908	0.438	0.284	-1.36		-0.357	1.51	-1.53	1.58	-0.0935		2.28	1.59	-0.121	0.938	3.07
-0.707	1.24	0.964	1.75	0.203		0.482	1.84	-2.3	2.17	0.114		2.51	0.3	0.812	0.0539	0.592
-1.06	-0.0549	-0.19	1.42	1.19		0.0116	2.33	-2.02	2.16	-0.226		2.21	1.46	0.281	0.602	2.62
-0.902	-0.102	0.325	1.63	0.359		-0.302	1.18	-1.38	0.876	0.657		2.5	1.8	0.207	0.329	2.18
-1.47	1.15	-0.251	0.551	-0.766		-0.67	2.85	-1.34	3.55	1.11		2.31	3.24	-0.379	0.396	2.95
-1.62	-0.341	-0.626	0.269	-1.52		1.23	1.66	-1.31	3.02	-0.2		3.21	2.73	-0.00438	1.53	2.87
-1.48	-0.275	-0.522	0.743	-0.47		-0.151	2.37	-2.56	1.31	-0.507		3.33	3.4	0.38	1.09	4.1
-1.21	-1.87	-1.38	1.24	1.17		1.45	2.08	-1.85	2.02	-0.523		3.21	1.48	0.291	1.77	3.66
-1.06	1.16	-0.632	1.35	0.345		0.213	2.11	-2.18	0.737	0.74		3.84	1.47	-0.821	0.189	4.35
-0.801	0.749	-0.669	0.754	0.575		-0.992	2.33	-1.39	3.19	-1.45		4.4	1.76	-0.538	-0.594	1.77
-1.48	0.824	-1.62	1.05	1.08		0.713	2.88	-1.5	2.92	0.414		2.9	1.41	-0.206	1.25	2.4
-1.07	-1.4	-1.68	1.46	-1.32		0.182	2.58	-1.45	1.86	0.376		3.61	1.21	-1.1	0.93	2.93
-1.78	0.61	-0.663	1.29	0.354		-0.115	1.97	-1.39	1.75	0.594		3.97	0.73	-0.536	2.86	3.24
-1.27	-0.845	-1.22	2.02	0.265		1.41	2.16	-2.27	3.3	-0.0502		3.61	0.606	-0.268	2.16	3.27
-1.88	-0.967	-1.32	0.791	-1.03		2.13	2.37	-1.75	3.22	1.7		2.26	1.77	-0.564	1.88	3.45
-1.88	-1.1	-0.672	0.822	-1.35		1.55	2.07	-1.53	2.51	1.12		1.31	-0.0525	-0.196	0.299	3.9
-1.87	0.481	-0.526	2.23	-0.079		2.12	3.04	-0.264	4.35	0.113		0.69	2.04	-0.324	2.07	3.53
-1.9	2.24	-0.458	0.698	-1.81		2.79	2.9	-0.959	3.78	1.35		1.3	2.62	-0.688	2.06	2.91
-1.55	1.09	-0.74	1.37	-3.29		2.95	1.67	-0.425	1.66	0.521		2.52	1.84	-0.383	1.24	2.37
-1.77	0.626	-0.207	-0.296	-0.963		3.71	1.77	-1.13	2.55	1.06		2.58	1.88	-0.273	2.89	1.98
-2.12	2.38	0.262	1.27	-1.04		3.45	1.55	-1.18	2.36	-2.18		2.52	1.52	0.0754	3.06	2.36
-1.95	1.88	-0.533	0.286	-1.04		3.23	0.557	-0.691	1.37	0.895		1.77	2.28	0.0252	0.0796	1.7
-2.44	0.812	0.0399	1.06	-0.762		3.28	1.07	-1.14	2.83	0.376		1.61	2.31	-0.281	1.71	0.776
-1.7	0.845	-0.151	2.54	-0.0796		4.07	1.1	-0.621	3.49	1		1.64	1.24	-0.372	3.56	2.85
-2.13	0.775	0.123	1.38	-0.351		3.82	1.44	0.209	1.67	-0.0182		2.19	2.24	-0.78	2.48	2.33
-2.64	1.19	0.00803	-0.559	-0.204		3.21	0.909	-2.09	3.31	0.566		3.44	1.71	-1.12	1.86	3.67
-1.46	0.238	0.308	0.693	-1.08		3.04	0.819	-1.66	4.13	0.278		3.01	1.06	-1.48	0.996	3.34
-2.19	0.586	-0.317	1.55	-0.177		3.29	-0.0742	-1.32	2.27	-0.00376		3.05	0.588	-1.11	3.52	3
-1.57	0.044	0.784	-0.109	0.628		4.08	0.535	-1.48	1.4	-0.0939		1.81	1.15	-1.13	1.7	1.78
-1.38	1.81	0.0992	0.525	0.802		4.37	0.126	-1.31	4.66	-0.632		1.19	1.81	-1.05	1.87	2.56
-0.715	0.217	0.726	-0.943	-0.445		4.36	0.829	-0.0328	3.28	-1.32		1.51	1.21	-0.781	0.555	1.93
-0.0641	-0.114	0.894	-1.1	-2.01		3.91	0.994	-1.03	4.1	1.38		1.29	2.05	-1.07	3.04	1.83
-0.506	1.17	0.808	0.0981	-0.108		3.79	0.778	-0.965	4.56	-0.198		1.56	1.88	-0.596	0.993	2.02
0.0303	-0.389	1.52	-0.628	-0.548		3.82	0.215	-0.575	2.56	1.86		1.54	1.26	-0.202	2.61	1.67
-0.182	-2.35	0.934	-0.376	-0.543		5.98	1.36	-1.21	2.98	0.761		1.47	1.65	-0.781	3.06	2.41
-0.0789	-0.155	0.414	-0.624	-0.303		4.63	1.17	-0.222	3.59	0.853		1.01	0.654	-0.574	0.194	2.73
-0.972	3.09	0.504	-1.32	-0.631		5.02	0.853	-1.71	4.29	-1.17		1.24	-0.387	-0.875	2.21	0.876
-0.723	1.1	-0.334	-0.0228	-1.9		5.46	0.729	-1.69	4.01	-1.6		0.789	-0.26	-0.675	0.307	0.454
0.188	0.0935	-1.15	-0.368	-1.11		5.02	0.611	-1	3.73	0.679		0.733	0.694	-0.362	0.69	0.908
-0.318	0.213	-0.563	-2.02	-0.558		4.5	0.955	-0.0604	2.74	0.132		1.01	-0.116	-0.206	2.98	0.492
-0.227	-0.883	-0.702	0.317	-0.339		4.78	0.432	-0.566	3.19	0.68		1.44	0.862	-0.511	1.79	2.83
-0.474	-0.0604	0.0565	1.57	-1.34		4.75	0.756	-0.239	3.49	0.422		1.56	1.53	0.412	0.925	2.81
-0.904	0.829	0.174	0.855	0.48		4.29	0.784	-1.19	4.6	0.0397		2.94	0.638	0.587	1.11	2.46
-0.266	0.544	-0.15	2.14	-1.38		4.52	0.405	-0.00726	1.79	1.36		3.83	0.495	1.71	2.59	2.95
-0.0704	-2.19	-0.0415	1.09	-1.01		3.92	-0.18	0.444	2.88	-1.65		4.03	0.816	1.53	2.38	2.13
-0.184	-1.81	-0.57	0.925	-1.56		5.05	0.212	-1.31	4.82	-1.51		3.88	1.19	2.05	1.45	1.22
-0.316	-0.0841	-0.96	-0.446	-0.247		3.7	0.159	-0.989	2.79	-0.433		3.45	0.594	0.529	0.724	2.48
-0.554	0.195	-0.677	1.17	-0.512		4.79	-0.309	-1.1	4.17	-0.887		4.07	1.24	-0.686	1.37	1.39
-0.742	-0.674	0.514	0.973	-1.14		3.54	-0.498	-1.14	2.57	0.391		2.33	0.613	-0.132	1.51	2.66
-1.41	0.472	0.547	-0.35	2.4		4.3	-0.527	-1.37	2.65	-0.363		2	1.32	-0.913	2.79	2.81
-1.13	-0.456	0.742	-0.054	0.182		3.72	-0.857	-1.32	2.25	-1.73		1.87	0.233	-1.11	2.99	3.54
-1.14	0.0869	0.624	2.89	1.97		3.1	-1.04	-1.09	2.15	0.974		1.95	0.418	-1.27	1.98	3.49
-0.998	0.633	-0.103	-1	0.0127		3.05	-0.974	-0.712	3.93	-0.143		2.75	0.556	-1.67	0.372	2.83
-0.805	-0.99	0.365	0.2	-1.41		3.25	-0.928	-1.29	4.32	0.903		1.84	-0.154	-0.985	1.65	3.63
-0.806	-0.421	0.694	-0.461	0.705		3.62	-0.147	-1.12	3.06	-0.938		2.02	1.08	-0.787	-0.0251	3.57
-2.01	-1.62	1.07	0.948	-0.216		3.98	-0.115	-1.66	2.82	-0.713		1.25	0.23	-1.57	2.65	1.41
-1.27	-0.831	1.17	0.292	0.487		3.99	0.634	-2.26	4.31	0.756		1.32	0.831	-1.77	1.02	0.811
-1.28	0.312	0.43	-0.0646	-0.554		4.13	0.365	-1.07	4.4	-0.569		2.9	-0.0972	-1.68	2.06	2.79
-1.18	-0.0734	0.639	0.496	-0.528		4.52	0.0149	-3.54	2.07	-0.312		2.28	0.581	-1.66	-1.4	3.26
-1.71	-1.47	0.944	-0.239	-0.403		4.48	-0.539	-2.99	2.58	-0.368		2.99	1.71	-0.625	0.849	2.48
-0.386	-0.357	1.42	-0.305	-0.392		4.2	-0.854	-3.07	3.06	-0.0135		2.33	2.85	-1.44	2.17	3.69
-1.52	-1.6	0.31	-0.47	-1.55		3.74	-1.01	-1.2	3.21	0.677		2.58	2.61	-2.07	1.8	0.883
-1.65	-2.18	0.431	2.01	-0.803		4.08	-0.169	-1.38	2.2	-0.316		3.34	2.2	-0.825	-0.895	0.0161
-1.79	-3.24	1.27	-0.228	-1.94		4.39	-0.186	-2.56	2.6	1.17		3.36	1.01	-1.37	-0.609	-0.311
-1.37	-1.58	0.785	0.417	-0.704		4.31	-0.0692	-2.64	2.43	-1.5		4	0.79	-0.936	2.16	1.61
-1.76	-2.47	0.417	-0.816	-0.761		5.04	0.0287	-2.58	2.3	-0.768		4.07	0.428	-0.619	2.64	0.376
-1.84	-1.65	-0.0732	-0.932	1.63		4.18	0.875	-2.46	2.51	1.04		4.32	0.137	-0.604	-0.357	2.11
-2.1	-0.941	0.667	0.879	2.54		3.65	0.14	-3.79	3.15	-0.0899		2.91	0.716	-1.55	-0.939	1.22
-1.93	-2.33	0.788	0.708	-0.161		4.45	0.705	-2.83	2.96	-0.15		1.88	1.91	-1.62	0.92	0.751
-1.66	-1.23	0.104	0.891	1.31		3.77	0.201	-1.39	2.32	-1.1		1.44	0.572	-1.96	1.73	2.85
-1.39	-0.338	0.523	-0.338	0.409		3.72	-0.0038	-0.684	1.3	-0.15		1.94	-1.35	-1.81	0.625	1.84
-1.64	-1.26	0.975	0.808	-0.167		3.49	1.04	-0.0123	2.53	-1.25		1.47	-2.49	-1.71	-0.656	1.6
-1.86	-0.865	0.121	-0.108	-0.578		4.43	-0.151	-0.747	3.07	-1.98		1.84	-1.32	-2.06	1.74	3.03
-1.87	-2.55	0.445	-1.34	-0.0843		3.2	0.496	-0.693	3.26	-1.32		1.43	0.891	-2.37	-0.0824	2.42
-2.95	-0.536	-0.221	-2.13	-1.81		3.16	0.78	0.273	2.68	-1.49		2.42	2.59	-2.11	0.443	2.05
-1.69	-2.78	0.455	-0.181	0.229		4.73	0.00783	-0.775	3	-0.55		2.97	3.05	-1.29	4.76	0.585
-2.25	-0.0509	0.653	0.258	0.93		4.12	1.13	-1.12	4.34	-0.588		2.15	2.7	-1.47	0.468	1.84
-2.1	-0.633	0.544	0.69	1.71		3.73	0.824	-1.32	4.3	-0.174		2.9	1.73	-1.04	2.61	2
-2.69	-0.156	0.282	0.756	1.08		2.73	1.22	-0.0124	4.35	-0.562		2.22	0.969	-1.92	2.65	0.793
-2.02	-1.63	0.949	0.675	1.2		4.21	1.4	-0.116	3.42	0.204		2.37	1.3	-2.32	1.08	1.53
-3.01	-1.5	1.17	-0.131	1.09		3.49	2.03	-0.246	2.98	-0.28		1.85	3.79	-3.09	4.26	1.38
-2.71	-0.847	0.597	-1.29	0.455		3.04	1.59	0.354	3.98	1.05		2.44	4.68	-2.48	2.65	1.06
-2.49	-0.795	1.09	0.469	0.796		3.44	1.44	-1.7	3.47	-0.304		1.62	5.8	-2.82	1.7	0.423
-2.7	-2	0.991	0.183	2.11		3.97	1.33	0.161	3.4	0.597		1.99	6.45	-2.71	2.09	0.657
-2.95	-1.61	1.23	-1.35	1.78		4.03	0.144	0.328	1.78	0.8		1.76	5.26	-2.14	1.01	2.28
-2.68	-0.802	1.14	0.308	0.313		3.37	-0.405	-0.285	3.06	-0.287		1.28	3.75	-1.86	1.85	0.393
-3.28	-0.551	1.29	-1.77	0.00365		3.05	0.432	-0.35	2.54	-0.933		1.12	3.22	-2.1	1.11	2.84
-3.16	-2.08	1.79	-0.106	0.571		3.27	1.42	-0.926	2.19	-0.43		1.39	4.05	-2.24	1.47	3.19
-3.02	0.398	0.736	1.35	-0.353		3.18	0.627	-0.642	2.27	-0.735		2.1	5.73	-2.35	2.41	1.93
-2.67	-1.18	1.45	0.128	0.0151		1.21	2.02	-0.677	3.08	-0.28		1.59	5.57	-2.65	-0.358	1.11
-2.85	-0.623	0.636	0.226	0.411		1.69	1.24	-0.83	0.737	-1.36		1.99	3.82	-2.34	1.33	1.72
-2.36	-1.15	1.1	0.465	0.211		3.4	0.745	-0.125	1.16	0.0507		2.7	5.52	-1.46	2.03	0.377
-3.22	-0.705	0.249	0.0899	2.13		4.26	0.216	0.0732	1.78	-0.817		3.32	4.45	-0.25	1.81	0.471
-3.25	-0.938	0.612	-1.65	1.59		4.46	0.286	-0.851	2.64	-2.01		4.52	3.61	0.107	1.4	2.48
-3.02	-1.03	0.975	0.116	1.69		5.59	-0.39	0.0754	3.27	-0.0593		3.4	5.05	0.378	1.63	0.996
-1.93	-0.606	-0.43	2.55	1.53		6	1.1	-0.153	2.24	-1.23		3.23	4.44	0.0569	1.21	0.241
-2.41	-0.321	0.671	0.718	-0.138		6.83	-0.198	-0.601	2.63	1.44		2.24	4.99	0.107	2.53	1.16
-2.2	0.0602	0.622	-1.18	-0.21		6.11	-0.456	-0.651	2.64	-0.45		2.5	4.99	-0.261	1.72	2.4
-0.688	0.501	1.06	0.497	0.992		6.8	0.146	-0.435	2.52	-0.564		2.19	3.83	-0.631	-0.214	2.52
-1.38	-1.82	0.494	1.34	-1.15		5.22	-0.255	-0.444	2.76	-0.259		2.15	4.16	-0.495	0.595	4.18
-1.07	0.0541	0.505	0.392	0.657		6.45	-0.207	-0.589	2.98	-2.18		2.25	4.37	-0.0839	0.73	1.5
-1.19	0.437	-0.588	0.773	0.798		5.37	0.0543	-1.43	3.33	-0.337		2.2	4.03	-0.386	0.726	0.148
-1.47	-0.211	-1.14	-2.38	-1.59		4.16	0.769	-0.943	1.73	-0.261		1.96	4.4	-1.28	0.69	1.84
-1.43	-1.6	-1.05	-1.08	0.443		4.89	1.18	-1.51	3.48	-2.09		2.93	5.42	-0.998	-0.273	1.3
-1.55	-0.851	-0.681	-0.396	-1.99		6.32	0.161	-0.865	3.41	-2.97		2.48	5.19	-0.572	1.5	1.51
-1.31	0.247	-0.915	-1.5	0.187		6.31	-0.855	-1.02	3.29	0.869		1.51	4.35	-0.0953	0.98	-0.359
-1.06	-1.64	-1.32	1.21	0.559		5.26	-1.28	-2.12	3.87	0.756		1.46	3.55	0.324	0.693	1.71
-0.888	-1.45	-1.03	0.115	-0.0834		4.7	0.951	-1.6	2.04	-0.484		1.93	2.11	0.372	-0.582	0.868
0.129	-0.39	-1.39	-0.475	-0.144		5.63	1.12	-0.608	2.95	-1.17		2.46	2.56	-0.646	0.498	1.87
-0.659	-2.23	-0.733	-0.549	0.615		5.18	-0.458	-1.1	3.56	-0.477		2.23	2.41	-0.628	1.68	1.61
-0.816	-1.48	-0.653	-0.12	0.0137		4.68	0.0657	-0.995	2.82	-1.73		2.61	2.57	-1.13	1.56	2.61
-0.889	0.946	-0.822	0.596	-1.43		5.25	0.82	-0.992	4.23	0.0562		2.67	3.43	-2.02	1.68	1.3
-0.93	0.815	-0.23	0.697	0.28		4.59	0.344	-1.49	1.86	0.761		2.4	2.84	-1.62	0.971	2.23
0.241	1.48	-0.698	0.623	-1.01		5.21	0.801	-1.05	2.36	-0.213		1.91	1.33	-2.53	3.22	1.79
0.288	2.47	-1.3	-0.211	0.57		4.73	0.75	-0.162	4.57	-0.282		2.53	1.72	-1.42	1.04	1.3
0.221	1.18	-1.42	-0.889	1.25		4.98	0.83	-0.288	2.85	-1.02		2.43	3.35	-2.57	2.26	2.53
-0.396	0.22	-1.09	-1.09	0.625		4.17	1.76	-0.894	2.71	-2.01		1.58	0.94	-2.21	1.03	1.12
-0.448	0.00145	-1.25	0.667	2.74		4.63	1.53	-0.568	1.96	-1.12		1.67	0.34	-1.93	-0.15	1.13
-0.265	0.832	-1.34	-0.25	0.982		3.94	1.57	-1.43	1.19	-1.9		2.72	0.567	-1.4	-0.56	1.55
-0.368	2.55	-1.07	-0.663	2.03		4.31	1.27	-1.71	2.2	-0.528		2.12	1.89	-1.35	-0.941	1.27
-0.374	-0.00594	-1.46	-0.425	0.369		4.23	1.23	-0.574	1.69	-0.52		2.82	0.509	-1.67	1.51	1.84
-0.171	0.651	-1.89	-0.942	0.366		3.14	1.5	-2.21	2.45	-1.3		2.51	0.27	-1.99	1.81	0.967
-0.489	1.34	-1.15	0.63	-0.303		2.9	0.589	-1.14	3.26	0.318		1.37	0.0356	-1.85	-0.25	2.99
-0.461	1.71	-1.22	-0.124	0.0836		4.24	1.61	-1.63	1.32	1.06		1.1	-0.22	-2.13	1.85	1.46
-0.685	1.02	-1.34	2.05	-0.567		4.49	1.06	-1.4	3.61	-0.345		2.16	-0.373	-2.24	1.45	-0.299
-0.589	-0.357	-1.3	-0.369	0.51		3.34	0.871	-1.9	3.29	0.616		2.06	-0.138	-1.7	1.26	0.391
-0.946	-0.694	-1.86	-1.08	0.806		3.33	1.9	-0.41	3	-0.384		2.29	-1.21	-2.24	1.72	0.693
-0.389	0.124	-1.55	-0.969	1.01		4.29	1.58	-0.874	1.45	-0.229		1.6	-1.24	-1.5	0.412	0.343
-0.00163	2.24	-2.32	0.266	0.684		4.06	1.31	-0.479	3.23	-0.612		2.59	-1.18	-2.2	2.35	0.184
-0.79	0.517	-1.95	0.183	2.16		4.14	1.52	-0.479	4.07	0.493		2.24	0.452	-1.21	1.58	2.58
-0.749	-0.00706	-1.55	-1.31	0.0206		3.83	1.62	-0.683	3.61	-0.383		2.13	0.923	-1.72	-0.0265	-0.102
-0.411	-0.0603	-1.87	-0.196	0.954		3.53	0.332	-0.968	2.61	-0.982		2.9	-0.164	-1.06	3.27	0.734
-0.443	-0.194	-1.41	-0.321	0.405		2.6	0.406	-0.152	1.33	0.547		3.01	-0.549	-1.72	-0.96	2.48
0.269	-0.163	-1.29	-1.24	1.36		3.84	0.413	-0.158	2.43	0.283		3.5	-0.355	-2	0.597	-0.339
0.412	0.834	-1.37	0.0569	0.147		4.12	0.702	-0.352	3.14	0.839		3.6	0.138	-1.47	0.014	1.9
-1.28	0.754	-1.59	-0.771	0.493		3.57	0.921	0.802	1.68	0.242		4.11	-0.108	-2.07	1.35	-0.701
-1.14	-0.832	-1.07	0.639	-0.33		2.56	1.14	0.594	3.05	0.265		3.15	0.9	-1.63	3.47	-0.391
-1.42	0.391	-1.24	0.374	0.384		3.13	0.229	1.15	3.2	-0.412		2.94	1.48	-1.29	1.37	0.772
