# Supplementary material for: Metabolic sensing in AgRP neurons integrates homeostatic state with dopamine signalling in the striatum
Source: eLife journal article supplement (doi:10.7554/elife.72668), 2022-01-12
Supplement: fig2-data1 [file Fig2E.xlsx]

## Sheet: Sheet1
NFO							CHOW							PB
1.52	-0.154	0.512	1.47	0.341	-0.407	-1.62	-1.15	0.976	2.44	1.66	0.0202	1.23	0.0597	1.62	-0.675	-0.462	-0.0968	1.67	0.573	-1.39
1.09	0.363	1.07	1.59	0.621	-1.23	-1.26	-0.567	0.773	1.42	0.786	0.984	1.25	0.0863	0.625	0.132	-1.26	0.405	1.61	-1.27	-0.921
0.519	-0.201	1.38	1.86	1.43	-0.57	-0.75	-0.85	-0.41	1.16	0.55	-0.0476	1.12	0.205	1.09	-0.653	-1.99	-0.372	0.911	0.512	-1.43
0.673	-0.147	-0.732	2.15	0.0317	-1.98	-1.47	-0.26	1.18	0.474	0.155	1.21	0.881	0.873	1.88	-0.457	-1.35	-0.104	-0.061	0.306	-1.51
0.649	-0.21	1.82	1.87	0.546	-1.02	-1.53	-0.757	1.68	-0.48	0.376	-0.553	0.742	0.54	2.67	0.059	-0.982	0.864	0.0875	0.53	-1.69
1.59	0.357	1.71	1.64	-0.4	-0.437	-0.997	-0.663	1.85	-0.466	0.452	-0.979	-0.805	-0.146	0.525	0.304	-0.891	0.97	1.89	-0.847	-1.67
0.203	1.42	0.731	1.59	1.22	0.00982	-0.24	0.843	2.12	1.21	0.661	-1.48	-0.356	0.418	-0.586	0.0523	-0.215	1.49	-0.196	-0.0354	-1.33
-0.0396	1.47	-0.382	1.72	1.4	0.0434	-0.6	1.44	1.38	0.458	0.719	-0.76	-1.31	-0.107	-0.469	0.389	-0.392	1.62	-0.981	-0.448	-0.767
0.47	1.19	1.27	1.77	0.986	0.943	0.254	-0.865	1.19	-0.674	0.543	0.666	0.135	0.418	1.06	0.661	-0.344	1.29	-1.91	-0.826	-1.79
0.928	1.03	-0.74	1.94	0.242	0.766	0.0115	-0.405	0.975	-0.433	0.496	1.52	0.0847	0.137	1.48	-0.107	0.772	1.25	-1.08	-1.26	-1.9
0.0987	0.143	-0.389	1.73	1.7	-0.696	0.328	-0.249	1.36	-0.406	0.202	0.244	-0.81	-0.35	1.78	-0.551	0.0659	0.427	-0.577	-1.37	-1.4
1.04	1.14	0.127	1.61	1.34	-0.953	-0.409	2.03	-0.39	0.425	-0.511	-0.883	1	-0.0363	1.65	-0.384	-0.0598	0.832	-0.42	0.762	-0.429
0.227	0.478	-1.89	1.61	0.179	-0.791	-0.419	1.21	-0.194	-1.27	0.135	-1.39	1.74	0.368	0.423	-1.13	-0.0197	0.0994	-0.976	-0.252	-0.601
0.451	1.02	0.98	1.14	-1.69	-0.00234	-0.207	2.63	0.288	-0.13	-0.176	0.864	-1.09	0.802	0.203	-1.5	0.834	-0.344	-0.87	-0.569	-0.938
1.59	0.244	0.912	1.35	-0.198	-0.0704	-0.792	0.18	0.296	-0.833	0.184	-1.46	-0.936	1.97	0.406	-0.296	0.695	-0.246	-0.723	0.633	-0.666
2.02	0.422	-0.416	0.228	2.15	-0.612	-0.998	0.703	-1.62	0.0387	-0.417	1.36	-0.517	1.45	-0.486	0.568	1.51	-0.301	-0.158	1.5	-0.786
0.962	1.75	-1.84	0.479	0.97	-1.32	-1.22	-0.258	-1.44	0.864	-0.25	0.823	0.285	1.3	1.56	0.492	1.22	-1.13	-0.733	0.251	0.159
1.72	-0.167	0.834	0.968	0.197	0.685	-0.805	-0.549	-0.605	1.25	-0.507	-0.486	1.06	1.65	1.43	-0.238	1.48	-0.59	-1.11	-0.37	0.423
2.29	0.58	-0.326	0.815	0.301	0.0387	-0.177	-0.406	0.58	-1.38	0.00733	-1.75	-0.344	0.784	0.453	-0.463	1.47	0.0941	-2.03	1.04	0.56
0.543	0.628	0.113	0.77	1.99	-1.1	-1.22	-1.23	-0.421	-0.251	-0.214	0.00823	0.202	0.582	1.49	-0.5	2.3	0.242	0.477	1.4	0.257
1.95	0.0603	-0.998	0.0383	2.4	-1.06	-0.749	-0.964	-0.536	0.396	-0.176	-0.396	0.472	0.854	0.00275	1.05	2.01	0.17	0.689	1.54	0.162
0.58	0.203	-0.203	-0.961	0.768	0.0506	-0.482	-0.719	-0.00797	0.967	-1.34	0.2	-0.145	1.1	0.425	1.31	1.23	0.475	-1.18	-0.645	0.359
0.2	-0.0529	0.351	-0.98	0.821	1	0.0997	-0.509	-0.485	0.429	-1.1	1.14	-0.77	1	0.289	0.992	1.4	0.334	-0.0815	0.024	0.759
1.23	1.03	0.108	-0.946	2.42	-1.11	0.159	0.975	0.557	-0.00467	-1.75	-0.749	-1.23	0.305	-0.898	1.35	1.67	0.137	-0.132	2.1	1.42
0.196	1.81	1.27	-0.218	1.09	0.701	0.231	0.456	0.602	0.797	-1.2	-0.544	-0.246	0.715	0.104	0.782	2.05	-0.883	-1.12	1.22	2.45
-0.418	1.45	0.0291	0.913	0.487	-0.0208	0.56	1.49	0.955	-0.157	-0.751	0.693	-0.202	1.71	-0.356	1.12	1.71	-0.903	-0.786	1.37	2.3
0.665	0.969	-0.668	0.771	-2.04	0.047	1.02	0.196	0.514	0.714	-1.41	-0.687	0.302	0.719	-0.0779	1.24	1.85	-1.02	-1.24	0.447	1.81
0.883	1.18	0.553	0.51	-1.43	0.525	-0.0352	0.759	1.58	1.53	-1.85	1.15	0.789	0.763	0.593	2.09	0.771	-0.906	-0.439	-0.191	1.84
2.38	0.687	-0.592	0.915	-1.96	1.41	-0.448	-0.552	0.837	1.12	-1.85	-0.934	1.81	0.587	0.775	1.86	0.787	-0.844	1.53	0.371	1.05
-0.554	0.368	0.651	0.265	-1.04	0.513	0.396	0.357	0.447	-1.8	-0.632	0.204	0.466	0.387	-0.227	0.64	1.52	-0.208	-0.173	-0.291	0.836
0.248	-0.161	0.391	0.131	-0.114	0.441	0.598	0.518	0.22	0.922	0.548	0.445	1.63	-0.178	0.534	0.647	1.15	-0.105	0.0653	-1.23	1.75
-0.251	-0.781	-0.726	-0.797	-0.855	-0.966	0.0103	0.741	0.611	-0.531	0.593	1.16	0.0995	0.143	1.13	0.322	0.753	0.164	-0.136	-0.186	1.24
0.386	-0.158	-0.424	-0.245	-0.0651	-0.832	0.879	1.53	0.596	-0.619	0.841	-0.612	-0.614	-0.646	0.351	0.514	1.49	-0.421	-0.421	0.326	0.847
1.27	-0.809	0.758	-0.65	-0.662	-0.756	1.05	1.14	-0.0909	0.342	1.71	-0.00579	-0.667	-0.575	-0.806	0.607	0.435	-0.102	2.48	0.496	1.13
0.346	-1.37	0.935	-1.22	-0.102	0.141	-0.256	0.85	-0.0444	1.09	1.67	1.21	0.948	-0.426	0.566	-0.024	0.684	0.366	0.908	1.12	1.61
-0.24	-1.62	0.136	-1.13	0.491	2.48	-0.305	-1.21	1.78	0.0173	0.675	0.18	0.0389	-0.546	0.378	-1.64	0.956	0.227	0.434	-1.44	1.52
0.443	-1.45	0.364	-0.175	-0.15	1.34	0.812	-0.768	0.996	0.304	0.931	-0.267	0.36	0.399	0.327	-1.48	1.36	0.364	0.205	0.168	1.49
-0.246	-1.11	1.59	-0.444	0.0256	0.227	0.539	0.37	0.763	0.0446	0.832	0.486	0.646	0.233	0.431	-0.0938	1.43	-0.698	-0.487	-0.859	1.07
-0.736	0.107	1.72	0.171	-0.503	-0.389	0.817	0.461	0.995	-1.23	-0.0835	0.0322	0.171	-0.218	-0.989	0.043	0.605	-0.56	0.00298	-0.933	1.27
0.382	-0.215	-0.0984	0.271	-0.158	-1.75	0.454	1.3	0.311	0.611	-0.768	-0.376	0.128	-0.197	-0.162	-0.357	0.116	-0.617	-0.125	0.0944	0.776
-0.478	-0.0415	1.23	0.903	1.72	-1.1	0.785	-0.0689	0.958	-0.15	-0.51	1.21	-0.175	-0.245	-1.27	0.000642	-0.58	-0.891	0.779	-1.8	0.848
0.371	-0.625	0.603	1.08	0.538	-0.245	0.186	0.788	0.34	0.231	-0.297	0.816	0.325	-0.348	-0.174	-0.495	-0.473	-0.965	0.797	-1.24	0.994
0.436	-0.135	-0.815	0.907	-2.52	-0.15	0.189	-1.23	1.14	-0.632	0.136	-0.125	-1.06	0.194	0.502	-1.09	-0.0407	0.379	-0.298	-0.79	0.902
0.33	-0.603	1.56	0.77	-1.05	0.949	-1.61	-0.135	0.482	1.23	0.866	0.24	0.159	0.61	0.994	0.107	0.409	1.08	0.031	-1.19	0.352
-0.11	-1.23	0.636	0.782	0.484	-0.845	-2.12	-0.507	-0.254	1.19	1.58	0.941	0.0451	0.724	0.318	0.709	0.382	1.08	1.32	0.888	0.589
-1.19	-1.44	0.707	0.502	-0.375	-1	-0.748	-0.0748	0.104	1.2	1.06	2.94	-2.22	0.846	-1.08	-0.366	0.98	0.533	1.05	-1.22	0.152
-0.651	-1.26	0.634	0.66	-0.746	-0.351	-1.27	0.738	-0.433	-0.862	1.37	0.0568	-2.07	1.09	-0.463	-0.543	-0.279	0.941	-0.433	0.185	0.273
-0.227	-1.65	0.548	-0.307	0.804	0.535	-1.31	-0.214	-0.564	1.25	1.29	0.699	-0.517	1.6	0.364	0.235	-0.0828	0.636	0.427	-0.447	-0.0323
0.982	-2.48	0.528	-1.35	1.01	0.791	-1.6	-0.63	-0.103	-0.468	1.66	-1.01	-0.68	1.78	0.146	-0.422	-0.18	0.977	0.0674	2.28	-0.299
0.946	-2.61	0.568	-1.38	0.664	1.22	-1.85	-0.197	-0.842	0.888	1.69	0.101	-0.0701	1.45	-0.405	0.775	-0.408	0.633	0.934	-0.742	-0.294
-0.396	-2.42	0.483	-1.33	-0.0127	0.964	-0.308	0.0746	-0.541	0.949	1.84	-0.35	1.21	0.905	0.618	0.389	-1.05	1.31	1.66	-0.93	-0.318
-1.04	-2.27	0.389	-0.86	-1.44	1.44	-1.34	1.11	-0.635	-0.208	1.29	0.072	-0.0718	1.09	0.259	0.583	-0.485	0.776	0.309	-0.484	-0.327
-0.82	-2.75	-0.734	-0.53	-0.0628	0.79	-0.732	-0.435	-1.89	-1.84	0.898	0.291	-0.255	0.956	0.056	0.227	-0.724	1.19	1.42	-1.51	-0.912
1.46	-1.51	0.931	-0.538	0.78	-0.421	-0.743	-0.11	-1.79	-0.722	0.316	1.4	-0.862	1.15	0.919	-0.457	-0.622	1.06	1.2	-0.703	-0.474
1.23	-1.06	-0.0047	-0.323	0.129	1.29	-0.135	-1.21	-0.305	0.868	-0.992	1.47	-0.201	0.486	0.202	-1.4	-1.5	0.928	0.245	-0.473	-0.0397
1.27	0.649	1.07	-0.441	0.899	1.42	0.0718	0.493	-1.15	-0.593	-0.543	-0.803	-1.89	0.81	0.308	-0.572	-2.01	0.983	0.948	0.07	-0.415
1.12	-0.0469	-0.0841	-0.733	-0.0399	0.497	0.933	0.0435	-0.283	-0.188	-0.917	-0.194	1.77	1.26	1.29	-2.04	-2.27	1.15	0.715	-1.19	-0.816
-0.559	0.249	0.889	0.151	0.327	-0.29	0.141	-0.985	-0.81	0.27	-1.55	0.669	-0.149	1.39	0.403	-1.38	-1.33	1.56	1.02	-0.572	-0.431
0.0334	1.12	-0.944	-0.151	-0.63	0.825	0.658	-1.42	-1.27	0.562	-1.28	0.0718	-0.938	0.634	-1.36	-0.697	-0.625	0.957	0.735	1.07	-0.925
-0.349	0.285	0.395	-0.0299	0.208	-0.248	0.786	-1.76	-2.16	-1.17	-1.55	-1.94	0.573	0.677	-0.626	-0.0157	-0.0936	1.31	1.09	-0.538	-0.455
-0.672	-0.326	1.35	0.101	1.73	0.92	1.5	-1.65	0.0037	-0.246	-1.18	-2.64	0.832	1.15	-0.235	-0.805	-0.903	1.77	2.03	-0.332	-0.791
0.0586	-0.392	2.81	-0.591	0.405	1.28	0.298	-0.761	1.29	-1.79	-0.765	-0.387	0.84	0.863	-0.159	0.991	-0.618	1.77	0.581	-1.19	-0.425
-0.836	0.903	1.11	-0.618	0.425	0.00314	0.685	-1.2	-0.604	-0.252	-1.1	0.112	0.437	0.799	-0.845	1.88	-1.06	1.01	0.0986	-0.374	-0.0134
0.434	1.47	-0.481	-0.451	0.925	-0.784	0.786	-1.17	-1.2	-0.814	-1.83	0.886	-0.707	0.186	-1.53	2.1	0.192	0.246	0.111	0.48	0.505
0.777	1.61	-0.312	-0.221	-1.09	0.362	0.976	0.00677	-1.67	-0.641	-1.55	-1.11	0.0861	-0.768	-0.771	1.79	-0.671	-0.105	0.63	-0.732	0.52
-0.306	1.19	0.543	-0.85	-0.469	-0.235	1.19	0.861	-1.31	-0.241	-0.282	1.45	0.0686	-0.817	-0.39	2.23	-0.874	-0.0599	1.67	0.582	0.25
-0.52	0.709	0.548	-0.947	-1.31	0.959	0.368	-1.1	-1.05	-2.1	0.528	0.416	0.488	-1.11	-0.637	1.22	-1.17	-1.33	0.877	-0.881	0.633
-1.55	1.12	-0.11	-0.122	0.199	-0.107	-0.23	-0.481	-0.851	-0.344	1.03	-0.426	1.5	-0.457	0.508	2.31	-0.508	-0.431	0.803	-0.405	0.63
-0.208	0.145	0.411	0.249	-0.709	0.352	1.35	-0.866	-1.01	0.142	2	-2.07	-0.188	-1	-0.639	1.6	-0.323	-0.0597	1.15	-2.03	0.551
0.0406	0.749	-1.95	0.113	0.262	-1.47	0.907	-0.938	-0.2	-1.6	1.58	-0.000816	0.757	-0.649	-0.529	1.04	-0.756	-0.138	1.27	-0.888	1.06
1.39	0.401	0.299	0.533	0.455	-0.679	0.85	-1.14	-0.514	-1.51	0.762	-0.628	-1.68	-1.13	-1.5	0.314	-0.426	-0.357	0.66	-2.27	0.672
-0.97	-0.387	-1.55	1.04	0.354	-0.662	1.65	-0.963	-0.879	-0.45	0.112	-0.658	1.27	-0.977	-0.547	1.64	-1.49	-0.374	-0.9	0.275	0.701
-1.44	-0.133	-1.76	1.07	-1.11	0.725	0.764	-1.21	-1.66	-0.307	0.127	-0.454	0.167	-1.11	-1.71	0.443	-1.68	0.597	0.0722	-0.0616	0.366
-0.651	-0.373	0.354	0.178	0.243	0.801	0.0592	-0.567	-1.59	-0.679	0.811	-1.6	0.425	-1.05	-0.913	0.647	-1.69	0.789	0.853	0.428	0.732
-0.607	1.27	-0.352	0.202	-0.977	-0.174	-0.116	-0.743	-1.43	-0.863	1.34	-1.97	-1.55	-1.13	-0.739	-0.0792	-1.31	0.631	-0.755	-1.32	0.179
-0.426	1.19	0.807	-0.419	-0.595	1.4	0.92	-0.467	-0.134	-1.58	1.82	-1.87	-1.41	-1.03	-1.1	0.312	-0.943	1.18	0.171	0.0752	-0.954
-1.66	0.323	-2.07	-1	-0.411	-0.446	2.27	-0.141	1.28	-0.572	0.977	-1.63	-1.09	-0.697	-1.33	-0.0461	-0.155	1.48	-0.733	-0.52	-0.395
-1.82	0.619	-0.378	-1.48	0.642	0.0769	3.16	-0.288	1.42	-0.365	-0.0378	-0.22	-0.883	-0.833	-2.45	-0.882	-0.638	1.01	-0.138	-0.564	-0.467
-1.36	1.19	0.865	-1.58	-1.03	-0.612	2.32	-1.77	0.655	-0.109	-0.667	-0.201	-1.99	-0.459	-0.724	-0.424	-0.706	0.845	-1.48	-0.995	-0.316
-2.27	0.717	0.11	-1.64	-0.65	1	2.21	-1.61	-0.392	-0.616	-0.462	0.628	1.04	-0.31	-3.23	-0.317	-0.393	0.741	-2.67	1.33	0.206
-1.02	0.997	-0.678	-1.64	0.626	0.884	-0.439	1.05	-1.41	0.595	-0.396	1.25	0.587	-0.213	-2.48	-1.2	0.111	-0.293	0.313	0.849	0.926
-0.323	-0.247	-1.02	-1.87	0.064	1.08	-1.7	1.99	-1.1	-1.24	-0.883	-0.13	0.2	-0.6	-2.61	-1.03	-0.196	-0.929	-1.18	0.802	0.653
-1.46	0.376	-0.724	-1.85	-0.418	-0.29	0.32	0.973	0.381	-0.357	-0.978	-1.36	-1.65	-0.292	-0.759	-1.58	-1.16	-1.43	-0.52	0.937	0.259
-0.854	0.218	0.965	-1.41	-1.22	2.2	-0.472	0.828	-0.264	-1.34	-1.11	-1.16	-1.06	-0.508	0.628	0.0137	-0.331	-1.97	-0.593	1.23	0.412
-0.175	-0.0583	-0.072	-1.61	-0.467	2.82	-0.0274	-0.789	-0.524	-0.658	-1.42	0.0618	0.656	-0.551	0.296	-1.07	0.291	-1.72	-0.258	1.51	0.283
-1.18	-0.258	-1.03	-1.46	-0.579	1.32	1.19	0.58	-0.177	-1.22	-1.54	-0.565	0.0829	-0.964	-0.341	-1.56	0.163	-1.39	-1.92	2.21	0.676
-0.895	0.00306	-1.65	-0.759	-1.5	1.35	1.37	2.01	-0.483	-0.918	-1.66	0.488	-0.682	-0.554	0.178	-1.35	-0.153	-1.33	-1.58	0.417	0.903
-1.12	-0.144	-0.777	-0.061	-2.94	0.202	1.65	0.696	-0.386	0.3	-1.04	0.208	-0.913	0.0168	-0.601	-1.26	-0.54	-2.15	-1.44	1.85	0.107
-1.06	-1.22	-0.448	-0.371	0.0466	0.818	0.305	-0.398	-0.492	-0.538	-0.727	0.317	-0.512	-0.496	0.247	-2.34	-0.16	-1.86	0.123	0.846	-0.209
-2.25	-0.809	0.0009	-0.581	-0.707	0.0839	0.256	0.221	-0.36	2.97	-0.497	-0.0167	-0.228	-0.337	0.572	-1.75	-0.697	-2.21	-0.139	1.34	-0.314
-1.17	-1.11	-0.668	-0.802	-0.848	0.202	0.365	-0.791	-0.759	1.35	-0.565	-0.374	0.323	-0.851	0.0998	-1.25	-0.0557	-2.73	-0.422	1.14	-0.582
-0.565	-0.0076	-0.907	-0.593	-0.875	-1.64	-0.126	0.112	-0.035	0.823	-0.636	0.7	-1.05	-1.56	0.659	-0.461	-0.17	-1.25	-1.06	1.03	-1.02
0.139	0.233	-0.865	-0.704	-0.0118	-0.596	-1.11	-0.886	0.276	2.48	-0.349	0.85	-1.29	-2.16	-0.187	-0.8	-0.286	-0.352	-0.631	0.687	-1.36
0.184	-0.277	-1.04	-0.724	-0.543	-2.01	-0.314	0.141	2.58	0.952	0.295	0.534	0.0129	-1.46	0.63	-0.77	0.35	-0.899	-1.68	1.34	-0.957
-0.677	-0.429	-1.3	-0.135	-0.639	-1.42	0.238	0.817	2.04	-0.804	0.195	0.847	0.425	-1.26	-0.83	-0.268	-0.0868	-1.08	-1.55	0.676	-1.42
-0.551	-1.31	-2.05	-0.103	-0.698	-0.00224	-0.978	0.522	1.74	1.35	0.415	0.934	1.09	-1.37	-0.228	-0.231	0.272	-1.2	-0.00696	0.677	-1.03
-0.165	-0.421	-0.425	-0.277	0.987	-1.46	-0.929	0.0285	-0.248	0.257	0.0167	-0.585	3.76	-0.907	-0.026	-0.48	0.591	-2.09	0.45	0.824	-1.65
-2.03	-0.296	-2.05	-0.339	-0.496	-2.3	-0.264	1.93	-0.273	1.48	0.385	1.46	2.07	-1.39	-0.187	0.97	0.16	-1.02	-1.12	-0.0208	-0.927
-0.609	0.736	-1.27	-0.403	0.21	-1.36	-0.702	1.04	-0.177	0.348	0.734	2.42	0.389	-2.06	-0.365	0.272	0.813	-0.454	-0.937	-1.1	-1.46
-1.24	0.433	-1.66	0.0906	-0.291	-1.11	-0.176	2.26	-0.437	0.559	0.551	-0.95	-1.01	-3.04	1.4	-0.167	0.343	0.178	0.0768	-1.11	-1.44
-0.0116	-0.0648	-1.08	-0.285	-0.452	-0.823	-1.61	2.33	-0.21	-1.59	-0.104	0.66	-0.0857	-3.12	1.18	0.086	1.49	-0.00141	0.933	-1.17	-1.75
-0.905	-1.17	-1.11	-0.0554	0.711	-1.97	-1.94	2.37	-0.219	-0.254	-0.357	0.573	0.802	-2.28	1.26	-0.545	1.99	0.0886	1.07	0.321	-1.8
-1.04	-0.0384	-2.65	-0.0491	-0.557	-0.852	-2.05	2.64	-0.159	-0.166	-0.549	-1.46	0.41	-1.91	1.2	0.0382	3.2	-0.492	-1.05	-0.42	-0.999
-0.829	-0.773	-1.7	-0.719	-0.112	-1.33	-2.49	2.07	-0.731	-0.507	-0.494	-0.221	2.04	-1.78	1.14	-1.9	1.2	-0.469	-0.644	-0.0361	-1.38
0.86	-0.805	-2.28	-0.697	-0.707	-0.0231	-2.06	2.38	-0.245	1.05	0.204	2.42	-0.0251	-2.05	0.886	-0.585	1.77	-1.04	1.18	1.59	-1.26
-0.911	-0.921	-1.25	-0.782	0.743	0.689	-3.03	2.12	0.0875	0.917	0.671	0.0525	2.81	-1.68	1.13	-0.648	2.12	-0.18	-1.15	-0.758	-1.18
-0.591	-0.77	-3.68	-0.852	-0.182	-1.75	-1.05	2.16	0.924	-0.832	0.33	-0.29	0.782	-2.11	1.09	-1.03	1.04	-1.08	0.116	-1.52	-0.764
-0.655	-0.489	-4.09	-1.21	-0.25	-0.53	-0.993	2.68	0.654	0.474	0.762	-1.39	1.46	-1.75	1.43	-0.792	-0.0584	-1.28	-1.29	-2.28	0.283
-0.163	1.28	-3.18	-1.34	0.412	-0.802	-0.0204	1.29	1.29	-0.24	0.0836	-0.0567	-0.1	-0.788	2.46	0.839	1.28	-2.15	-0.29	-2.78	-0.0365
0.523	-1.35	-1.9	-1.51	-0.12	-0.86	-0.763	2	-0.0422	0.592	-0.132	0.539	0.603	-0.662	2	0.97	0.328	-2.5	0.225	-1.5	0.149
1.57	-0.732	-2.76	-1.22	-0.576	-0.703	-0.594	-0.57	0.181	-0.326	-1.08	2.39	-1.2	-1.7	2.08	1.01	0.0232	-2.82	0.377	-3.57	-0.151
1.15	-0.171	-1.76	-1.42	-0.391	-1.01	-0.131	-0.0319	0.47	-0.173	-0.896	1.77	-0.85	-2.56	0.748	0.511	0.675	-3.11	-0.483	-3.09	-0.209
-0.596	-0.00856	-1.52	-1.55	-1.28	-0.838	-0.296	-0.355	1.3	-0.475	-0.603	0.287	0.879	-2.2	2.25	2.19	0.716	-3.23	0.891	-1.15	0.0127
-0.67	-0.912	0.0854	-1.17	-0.299	-0.142	-0.107	0.0917	0.373	-0.69	-1.33	0.189	0.878	-2.09	2.18	0.825	0.189	-2.75	1.63	-1.43	-0.91
0.505	-1.3	-1.65	-0.931	1.07	1.27	0.238	1.32	1.9	-0.491	-2.01	-0.703	1.53	-2.17	2.63	1.08	-0.161	-2.23	-0.417	-1.83	-0.325
0.23	-1.34	-1.1	-1.19	-0.192	-1.12	0.175	0.559	1.47	0.759	-1.6	0.533	0.148	-2.13	3.15	1.32	0.402	-2.26	-1.02	-0.113	-0.986
1.6	-0.721	0.289	-0.842	-1.01	-2.48	1.03	0.489	-0.0554	-0.933	-0.752	0.123	0.06	-2.29	3.06	1.28	1.12	-2.24	1.53	-0.385	-1.12
1.57	-1.79	0.0756	-0.409	0.333	-2.69	0.852	-0.744	-0.143	-0.905	-1.38	-0.975	0.283	-2	3.23	1.34	0.796	-3.12	1.78	-0.118	-1.25
1.7	-2.08	-1.07	-0.717	-0.114	0.0686	1.28	-1.3	0.14	-0.45	-2.35	-1.5	-0.302	-2.22	2.95	2.18	-0.122	-2.62	-0.0787	-0.416	-1.34
1.67	-1.26	-1.18	-0.466	0.743	1.09	2	-1.96	-0.797	-2.93	-1.78	-0.0307	0.434	-2.52	3.08	1.35	1.05	-2.29	-0.983	-0.28	-1.3
-0.486	0.462	-1.03	-0.221	1.11	-0.647	1.21	-0.936	-0.279	0.522	-0.848	0.86	-0.315	-2.62	2.8	2.76	0.705	-2.37	0.31	-1.16	-1.02
-0.688	-0.241	0.837	0.318	0.693	-1.27	1.34	-0.679	0.461	0.977	-0.971	0.612	1.08	-3.09	3.37	2.16	-0.0763	-2.11	-0.56	-1.53	-1.07
-0.544	0.711	-2.94	0.715	0.214	1.58	0.137	0.554	-0.173	1.04	-1.25	-0.0319	0.847	-2.75	3.44	1.85	0.0608	-2.92	0.648	-2.45	-1.13
0.747	1.09	-2.38	0.705	-0.00339	1.1	0.713	-0.637	0.00137	-0.564	-0.662	-0.97	1.44	-3.3	3.87	0.899	-0.254	-2.78	-0.437	-1.82	-1.45
1.29	1.63	-1.06	0.796	-1.19	-0.104	0.943	0.817	-0.0476	-0.217	-0.714	-0.241	1.68	-3.61	4.37	1.47	-0.656	-2.73	0.596	-2.35	-1.24
0.45	1.02	-0.471	0.856	1.63	-1.03	-0.0701	-0.207	-0.0271	-2.12	-0.0107	1.2	0.249	-2.99	4.2	-0.621	-0.183	-3.11	0.587	-2.38	-0.883
-0.898	1.82	-2.42	0.849	1.09	-1.06	-0.601	2.12	0.571	-0.398	0.521	0.0111	1.26	-3.35	3.18	-0.462	-1.34	-3.45	0.151	-2.31	-0.977
-2.2	0.421	-1.48	0.26	0.718	-0.844	-1.26	-0.211	-0.145	-0.433	1.33	2.46	0.716	-3.71	3.79	0.272	-1.05	-2.64	-0.127	-1.76	-1.3
-0.748	0.158	0.121	0.57	0.455	-2.43	-0.95	1.93	0.294	0.357	1.38	0.332	2.12	-3.38	3.21	-0.186	-1.29	-2.88	1.62	-1.47	-1.19
-0.51	0.253	-1.91	0.723	-1.06	-3.41	-0.871	2.38	-0.357	0.164	0.184	0.568	0.0242	-3.22	3.29	-0.72	-1.29	-2.17	0.927	-0.443	-2.02
0.222	-0.303	-2.48	0.411	-1.93	-2.1	-1.7	0.724	-1.32	-1.01	0.848	0.206	-0.92	-3.37	3.43	-0.105	-1.26	-2.93	1.2	0.222	-2.05
-0.568	-0.499	-2.52	0.0866	-1.14	-0.162	-2.23	1.26	0.251	-0.95	0.924	-0.568	-1.86	-2.49	4.18	-0.618	-1.41	-2.86	-0.507	-0.65	-2.05
-0.113	-0.421	-3.24	0.56	0.75	-0.342	-2.75	2.28	0.842	-0.778	0.599	-1.58	-0.375	-2.98	3.65	0.51	-0.971	-2.39	-0.35	0.675	-1.97
0.814	-1.11	-1.66	0.797	-0.233	1.65	-1.8	0.208	0.618	-1.53	0.871	1.19	1.37	-2.75	3.82	-0.00819	-1.2	-1.6	0.949	0.721	-1.99
-0.00642	-0.24	-2.2	0.578	-0.308	0.245	-2.38	0.683	1.2	-0.223	-0.722	2.55	1.02	-3.21	5.26	-1.19	-1.01	-1.52	0.819	-1.21	-2.15
-0.112	0.073	-0.519	0.564	-1.25	0.497	-2.28	1.08	2.76	-0.172	-0.385	-0.283	0.892	-2.76	6	-0.177	-0.766	-1.21	1.09	-0.447	-3.67
1.06	-0.345	-2.84	0.124	-0.195	-0.88	-1.51	1.31	1.2	0.201	-1.11	2.82	-0.34	-3.79	5.85	-0.589	0.0196	-0.549	-0.39	-0.294	-2.83
0.573	0.81	-3.52	0.41	-1.13	-1.57	-2.35	1.67	2.25	0.911	-1.17	0.193	-0.158	-3.35	6.18	-0.226	0.408	-0.83	2.01	-1.48	-2.66
0.982	0.69	-2.81	-0.371	0.0268	0.461	-2.26	1.76	1.39	-0.0661	-1.13	1.44	0.373	-3.82	3.27	1.72	-0.232	0.15	2.71	-0.603	-1.99
1.57	0.25	-2.85	-0.879	-0.013	1.39	-2.75	1.94	0.99	-0.51	-0.35	3.09	0.997	-3.58	2.76	0.357	0.0726	-0.0278	1.2	-1.48	-1.77
1.2	-0.508	-2.7	-0.9	-0.491	-0.876	-1.76	0.441	0.856	0.737	0.622	0.777	0.0436	-3.84	2.2	1.44	0.326	-1.29	0.0399	-1.77	-1.78
1.97	0.0991	-2.5	-0.643	0.486	-0.398	-0.243	1.95	0.414	0.998	0.7	0.191	-0.429	-3.91	2.8	0.017	1.03	-0.425	0.504	-1.18	-1.48
0.26	-0.0635	-3.07	-0.487	0.22	-1.26	0.617	1.33	0.342	-1.24	1.05	0.359	-0.759	-4.06	1.19	-0.566	1.4	0.323	1.34	-2.02	-0.678
-1	0.0399	-2.7	-0.324	0.792	-1.53	0.926	0.687	0.0359	0.0589	1.2	-0.252	1.01	-3.54	1.96	-0.336	0.944	-0.507	0.243	-2.07	-1.61
0.176	-0.118	-2.82	0.014	-1.77	-1.22	1.81	0.816	1.36	-0.741	1.39	0.711	0.575	-2.98	2.75	-0.0122	0.222	0.362	-0.169	-9.36e-05	-2.37
0.735	0.188	-2.28	-0.197	0.205	-2.63	0.0862	1.38	0.503	0.0627	1.23	-0.815	1.41	-3.05	3.47	1.05	0.542	-0.926	-1.38	-0.639	-2.27
2.42	-0.396	-5.01	-0.134	0.143	-0.937	0.635	1.2	2.48	-1.14	1.41	-0.394	0.944	-2.6	5.32	-0.166	0.673	-1.36	0.937	0.38	-2.85
0.364	-0.0589	-4.2	-0.134	0.141	-0.552	1.04	0.131	1.39	-2.36	1.6	-0.456	0.801	-1.58	5.05	0.662	1.07	-1.44	0.528	1	-2.5
-1.13	-1.04	-1.57	0.338	0.959	-1.41	0.337	-0.838	0.0961	0.124	1.31	0.454	1.12	-1.14	1.74	0.42	1.26	0.0353	1.11	-0.604	-2.27
-0.299	-0.815	-5.01	0.151	-0.413	-2.04	-0.926	0.307	1.15	-2.32	1.47	-0.091	1.88	-1.01	2.87	0.173	1.11	-1.42	-0.21	-1.91	-1.68
0.237	-0.22	-3.84	0.223	-1.01	-1.36	-0.398	-0.0628	1.77	-1.1	1.13	0.441	0.818	-0.819	2.05	-1.26	1.58	-0.766	-0.576	-0.542	-0.969
-0.923	-2.51	-2.12	0.443	-0.808	-1.5	-0.233	0.566	1.47	-1.06	0.749	0.89	0.682	-1.02	2.09	-0.49	1.67	-1.14	0.792	-1.18	-2.2
1.2	-2.18	-2.23	0.511	-0.802	-1.03	-0.39	-0.283	0.957	-1.75	0.655	1.92	1.16	0.0935	2.74	0.243	1.46	-1.85	1.65	-0.374	-2.74
0.949	-2.95	-2.85	0.551	-0.458	-1.29	-0.434	-0.236	2.52	-0.609	0.663	0.765	0.765	0.448	2.46	-0.447	1.5	-1.27	0.118	-0.781	-2.65
1.13	-2.82	-3.93	-0.0209	-0.165	-1.91	0.0687	0.137	1.73	-1.76	0.442	1.31	0.939	0.566	2.89	0.43	1.54	-1.19	0.252	0.207	-2.08
0.51	-1.92	-3.47	0.0056	-0.69	-0.822	0.351	0.0169	2.89	-1.52	-0.357	0.749	1.56	0.638	3.03	-0.303	1.79	-1.27	0.882	0.207	-2.5
-0.17	-1.14	-2.25	-0.331	-1.72	-0.417	-0.536	-1.42	0.813	-0.597	0.209	0.973	0.758	1.18	2.53	0.167	1.11	-1.71	1.02	0.727	-3
1.18	-2.6	-3.06	-0.34	-1.99	-0.364	0.673	-0.182	1.85	-0.481	-0.00295	2.14	1.65	0.545	1.74	0.473	0.704	-2.74	-0.199	-0.474	-2.69
1.25	-3.36	-2.89	-0.688	-2.17	-0.9	-0.916	-1.42	1.25	-2.74	0.282	-0.0414	1.5	-0.503	1.6	0.842	0.735	-2.88	-1.56	-2.88	-2.77
1.58	-2.94	-2.92	0.2	-1.21	0.00153	-1.43	-0.602	2.22	-0.349	0.361	0.549	0.152	-1.49	1.91	0.92	1.23	-2.53	-0.515	-3.43	-2.6
1.97	-2.26	-4.5	0.181	-0.502	-1.02	-0.448	-1.45	2.71	-1.26	0.59	2.06	0.46	-1.68	1.25	0.753	1.42	-2.92	-0.875	-1.69	-3.12
1.36	-1.83	-4.55	-0.407	-0.426	-2.85	-0.26	-1.16	2.66	-0.0896	1.09	-0.302	-0.182	-2.39	1.11	0.0724	1.16	-2.98	0.307	-1.78	-2.62
0.885	-2.16	-3.69	-0.116	0.111	-2.27	-0.638	-1.56	1.79	0.548	0.379	-0.0327	-0.429	-1.47	1.8	0.834	0.791	-2.68	-0.449	-0.884	-3.19
1.74	-1.66	-3.1	0.0499	-0.841	-2.1	-0.325	-1	2.35	0.475	0.353	1.23	-1.49	-0.85	2.04	1.42	1.09	-1.83	0.796	-1.33	-3.29
3.75	-1.54	-3.41	-0.16	-0.717	-0.859	-0.275	-1.33	0.556	-1.31	0.358	-1.03	0.688	-0.531	2.76	1.05	1.12	-1.82	1.97	-0.822	-3.32
3.24	-1.87	-3.14	-0.648	0.363	-0.919	-1.57	-1.65	0.497	0.29	0.517	-0.476	0.76	-1.7	2.76	2.73	2.38	-1.79	0.643	-1.7	-3.22
2.52	-2.54	-2.75	-0.0132	0.843	-1.49	-0.524	0.601	0.93	0.268	0.0258	-0.613	1.81	-1.46	2.51	3.24	1.8	-2.96	-0.114	-2.03	-3.13
2.41	-2.14	-3.09	-0.00108	-0.0906	-1.82	-0.0659	-1.53	1.52	-1.3	0.532	-0.421	2.45	-1.41	4.53	2.7	1.85	-2.21	0.663	-1.6	-3.32
1.72	-0.763	-3.94	-0.0808	-0.829	-3.11	-0.974	-1.65	1.93	0.0952	0.262	0.434	0.922	-1.18	3.61	2.39	1.15	-2.65	0.949	-1.76	-3.41
0.983	-0.446	-3.06	0.185	-0.506	-2.74	-0.747	-1.96	2	0.238	0.159	-1.93	1.15	-1.51	1.74	0.626	0.498	-1.88	0.985	-0.809	-3.53
1.99	-0.345	-2.48	-0.0119	0.31	-1.26	-1.25	-1.27	2.73	0.554	0.0926	1.07	0.627	-1.33	1.57	0.438	0.947	-1.4	-0.508	-1.64	-3.63
2.04	-0.637	-4.03	-0.0301	-0.33	-1.36	-1.69	-0.486	1.41	0.236	0.463	-0.853	0.853	-1.48	0.649	2.74	-1	-1.21	3.08	-0.771	-4.08
1.96	0.329	-3.16	0.0929	-0.237	-1.71	-2.59	-0.771	1.58	-0.362	-0.0536	-0.499	0.725	-1.77	0.0193	2.35	0.0724	-1.46	2.01	-2.64	-3.33
2.66	0.202	-3.04	-0.188	1.02	-3.03	-1.94	-0.226	1.32	-0.0261	-0.0531	0.125	0.281	-2.16	0.42	2.06	0.738	-1.93	-0.0991	-2.56	-2.77
1.49	0.145	-3.12	0.108	0.822	-3.34	-1.67	-0.629	1.36	1.23	0.865	0.84	2.74	-1.51	0.514	2.05	1.03	-2.38	0.795	-1.77	-2.4
0.495	0.293	-4.03	-0.0727	-0.227	-0.476	-0.959	-0.892	1.07	-0.145	0.934	0.275	2.11	-1.99	-0.00526	1.77	0.95	-1.67	0.0304	-0.798	-1.88
1.5	0.534	-2.68	0.0234	0.581	-0.567	-0.888	-0.0406	1.25	-1.77	0.549	0.551	0.573	-2.08	1.61	2.98	1.17	-1.78	-0.829	-2.51	-1.37
0.126	-0.866	-2.36	0.245	0.699	0.00737	-0.117	-1.43	1.06	1.9	-0.261	-0.145	1.26	-1.34	1.83	0.979	-0.441	-1.92	-1.75	-1.41	-1.57
0.781	0.084	-3	-0.25	-0.425	-1.13	-0.465	-2.21	1.63	1.38	-0.712	-0.18	0.788	-1.48	3.62	2.87	-0.0651	-1.37	0.785	-0.668	-2.46
0.746	1.44	-0.748	0.404	0.687	-0.904	-0.194	0.0832	0.754	4.12	-0.775	0.643	1.2	-0.256	1.15	4.49	0.386	-1.9	1.27	-0.912	-1.94
0.124	0.4	-3.03	0.917	-0.255	-0.427	-0.886	-0.692	0.302	3.01	-0.00142	-0.357	1.78	0.135	3.18	3.44	0.82	-1.06	0.838	-1.07	-2.27
0.778	0.704	-0.606	0.816	-0.931	-1.31	-0.861	-1.23	0.0858	3.77	-0.102	1.25	1.74	0.0779	2.13	3.6	1.44	-1.48	1.34	-1.8	-1.54
0.702	0.697	-1	0.596	0.0871	0.122	-0.765	-1.14	1.05	3.91	-0.246	0.857	-0.888	0.00878	3.45	3.96	1.01	-1.13	1.19	-0.0322	-1.99
1.28	-0.103	-0.396	0.262	0.802	-0.122	-0.707	-1.2	1.82	3.62	-0.428	1.51	1.41	-0.151	4.11	2.85	1.19	-1.91	0.348	-1.3	-1.18
0.174	-0.634	-1.71	-0.137	0.532	0.444	-1.02	-0.111	1	5.16	-1.56	0.0681	1	-1.14	5.29	2.81	1.31	-1.93	1.41	-0.549	-1.94
1.16	-0.445	-2.02	-0.69	2.22	-1.62	-0.269	-1.77	-0.557	6.62	-0.831	0.759	-0.756	-0.22	4.45	2.74	1.13	-2.36	0.104	-0.58	-1.8
0.734	0.179	-1.65	-0.348	1.26	-1.05	-2.1	0.398	0.296	5.72	-0.209	-0.0667	1.12	-0.0173	3.85	2.4	0.196	-1.46	1.44	-0.831	-1.67
-0.108	-0.275	-0.102	0.00603	-0.802	-1.8	-2.62	-1.56	0.595	5.04	0.0567	0.733	-0.427	0.00548	3.23	2.12	0.66	-0.976	-0.567	-1.12	-1.89
1.44	0.619	-0.164	0.399	0.716	-2.95	-1.87	-2.34	1.03	4.71	0.339	-0.632	1.62	-0.245	3.75	1.37	0.607	0.109	-0.7	-0.719	-1.27
0.945	1.07	-0.901	0.291	1.89	-0.309	-1.76	-0.791	0.974	6.61	0.325	1.03	0.88	0.683	4.23	1.99	0.358	-0.814	0.821	-1.24	-1.11
1.8	1.18	-0.58	0.0566	-0.119	-0.166	-0.893	-0.32	1.95	5.88	0.419	2.12	3.2	-0.345	4.11	2.05	0.102	-0.141	-0.203	-0.383	-1.24
0.603	1.53	-0.562	0.0943	0.842	-2.99	-1.81	-0.301	1.34	5	0.652	0.773	1.14	-0.847	5.07	2.19	0.832	-0.71	2.05	0.679	-2.28
2.11	1.09	-0.733	-0.152	-0.0841	-0.144	-1.99	0.509	1.14	3.48	0.941	0.33	-0.382	-1.82	7.89	3.46	0.628	-0.953	0.146	0.949	-1.98
1.21	2.2	-1.12	-0.201	1.48	-0.704	-3.54	-0.468	0.375	4.79	0.811	-1.75	0.901	-2.44	6.8	3.45	1.02	-0.619	-1.02	-0.141	-1.24
2.39	2.11	-1.76	-0.168	-0.81	-1.35	-3.43	0.274	1.15	5.74	0.213	0.294	0.423	-3.28	8.27	1.49	0.926	-0.222	1.77	1.75	-1.9
1.74	1.41	-1.09	-0.423	-0.709	-1.13	-2.96	0.109	0.386	4.66	1.54	1.28	0.203	-3.16	7.43	2.12	0.655	-1.31	1.16	-0.0385	-1.37
1.57	-0.569	0.417	-0.211	-0.171	-0.288	-2.33	0.904	1.53	4.95	1	-0.373	-1.17	-3.19	7.42	2.21	0.917	-1.51	0.104	1.34	-0.957
1.61	-0.213	0.0396	0.14	-0.224	-0.979	-3.06	1.72	1.09	4.53	0.836	0.184	-1.13	-3.47	7.96	1.86	0.788	-1.43	-0.395	1.62	-0.682
2.92	-0.777	0.773	0.189	0.556	0.272	-2.83	1.77	1.68	5.97	1.37	-1.51	0.136	-3.42	9.2	1.25	0.302	-1.94	-0.285	0.486	-0.744
3.04	0.42	-1.57	-0.0198	-0.709	-1.37	-1.97	2.55	0.686	6.46	1.46	2.36	-0.266	-4.07	8.9	1.71	0.633	-1.6	0.951	0.5	0.143
3.57	0.811	-0.246	0.151	0.286	0.309	-2.56	3.29	0.35	3.48	1.26	0.0484	-1.16	-3.99	8.58	2.03	1.67	-2.53	1.57	-0.706	-0.87
2.44	1.25	0.616	-0.231	-0.0817	-0.668	-3.64	3.69	1.14	3.83	0.507	1.68	-0.202	-5.15	8.15	1.64	1.53	-2.03	2.45	-0.857	-0.31
2.43	1.6	1.22	-0.0662	0.816	-0.0159	-2.74	0.728	0.867	2.9	0.624	2.82	-0.661	-4.22	7.76	2.01	2.4	-1	2.24	1.18	0.402
1.01	0.768	0.684	-0.152	0.64	0.122	-2.77	2.62	0.769	4.93	0.708	3.3	0.784	-4.6	8.07	2.84	2.23	0.385	2.14	1.29	0.192
1.98	1.26	2.12	-0.179	1.6	0.569	-1.42	0.878	1.38	4.96	0.659	4.47	1.33	-4.5	8.36	2.7	2.39	0.364	3	1.51	0.25
2.99	1.63	0.518	-0.237	0.827	1.48	-2.57	2.07	0.994	2.45	0.371	4.04	1.6	-4.12	8.03	2.61	2.68	-0.0447	2.57	1.19	0.599
3.71	1.55	0.191	0.208	0.493	0.58	-3.43	2.41	1.98	4.42	1.15	2.84	1.87	-3.38	8.24	2.86	2.94	-0.565	3.08	-0.917	0.528
3.79	0.622	1.74	-0.285	0.0174	-1.79	-2.53	1.84	1.49	3.84	1.14	4.38	-0.821	-3.08	7.99	3.24	2.35	0.257	1.79	-0.279	0.844
1.86	1.18	1.38	-0.357	-0.118	-2.75	-1.58	1.53	1.87	2.2	0.839	4.19	-0.356	-3.26	7.98	3.05	3.06	0.279	2.77	0.357	0.959
2.54	1.21	0.443	0.0219	1.27	-2.79	-0.85	2.01	1.37	4.03	1.06	7.73	0.124	-2.92	8.27	1.54	2.22	0.673	2.67	-1.25	0.912
1.85	-0.0593	1.48	0.327	-0.243	-1.87	-1.01	2.09	1.76	4.96	1.65	5.02	-0.469	-3.12	8.03	2.89	2.78	0.6	3.03	-2.21	0.724
2.38	0.516	1.19	0.00262	1.29	-0.624	-0.587	1.14	0.745	3.68	1.96	4	-0.243	-2.71	7.42	1.77	3.41	0.815	3.24	-1.09	0.459
1.95	1.46	0.985	0.124	0.581	0.253	-1.35	2.29	0.779	3.56	1.83	5.06	1.12	-2.99	8.22	1.72	3.16	-0.311	2.54	-0.852	0.967
3.03	1.03	0.125	0.076	1.99	0.68	-1.66	2.22	0.544	3.43	2.33	3.94	-0.385	-3.08	8.42	1.77	3.7	-0.561	3.28	0.382	0.233
2.81	1.47	1.28	-0.907	1.21	1.4	-2.01	1.05	0.182	2.88	2.4	4.89	0.613	-3.11	8.23	2.36	3.62	-0.0268	3.76	0.516	0.0114
4.39	0.603	1.32	-0.391	1.98	3.39	-2.58	1.53	1.6	4.4	2.27	5.5	0.714	-2.72	7.13	2.97	3.37	1.21	2.22	1.7	0.621
4.48	0.942	0.488	-0.384	1.28	1.53	-2.51	3.05	1.37	2.69	2.24	4.64	0.568	-2.33	7.75	2.59	3.16	2.08	4.15	0.339	0.665
3.33	1.62	1.73	0.0301	1.98	0.46	-2.42	3.18	1.9	2.7	2.58	4.26	0.828	-1.98	7.54	3.2	3.59	1.65	3.48	0.342	0.322
3.93	1.94	0.416	0.297	2.85	1.68	-1.27	2.29	1.81	2.39	2.45	3.87	0.953	-1.68	6.61	2.73	3.55	1.96	3.94	-0.0149	0.101
2.65	1.36	1.76	0.167	0.895	2.34	-0.686	0.454	1.88	4.18	2.84	3.12	0.281	-1.92	8.47	3.28	2.91	2.51	3.96	1.59	0.305
4.55	2.09	1.8	0.189	1.6	1.72	-0.77	0.95	1.52	4.69	2.91	4.14	0.659	-1.76	7.46	2.33	3.44	1.47	4.47	2.07	0.0363
3.28	1.76	2.17	-0.0915	-0.0963	2.25	-1.49	1.11	2.07	3.48	2.73	3.03	1.87	-1.99	6.82	1.2	3.64	1.15	3.04	2.12	-0.352
4.51	1.03	3.43	0.379	0.566	0.931	-1.15	0.742	1.65	2.77	2.65	3.6	2.11	-2.04	8.32	1.69	3.15	1.48	2.09	2.07	-0.356
4.01	1.03	3.9	0.446	-0.0539	2.34	-1.13	1.14	0.64	1.4	2.54	5.02	1.39	-2.94	6.66	0.865	4.21	1.53	3.89	0.303	-0.115
3.43	0.142	4.14	0.56	0.872	0.608	-1.2	1.18	0.755	1.36	2.65	4.82	0.832	-2.42	7.03	2.23	3.62	1.73	3.77	-0.98	-0.158
4.01	0.984	2.17	0.988	0.417	1.7	-1.43	0.859	0.83	0.47	2.22	5.92	0.636	-2.83	6.46	2.86	4.93	1.66	2.67	0.514	-0.0603
3.43	1.38	2.21	1.03	0.93	2.52	-1.8	0.493	0.345	2.02	3.01	4.94	1.08	-2.51	7.17	2.22	4.31	0.393	2.85	-0.497	-0.0616
3.67	1.13	2.29	0.733	1.75	1.29	-2.4	1.01	0.708	2.12	2.68	3.27	1.35	-2.84	8.06	3.23	4.55	1.55	3.12	-0.437	0.273
3.17	1.49	1.85	1.15	0.405	2.14	-3.57	0.252	0.618	2.2	3.05	5.91	3.05	-2.59	6.48	1.73	3.88	1.22	3.66	-0.586	-0.0554
3.08	1.73	1.3	1.34	-0.114	0.642	-3.07	0.274	1.08	2.38	3.22	3.94	1.77	-2.86	7.07	2.59	4.47	1	2.28	-0.631	0.172
3.81	0.917	2.02	1.34	0.331	1.98	-2.89	1.32	-0.56	1.06	3.29	4.93	2.02	-2.5	5.93	1.34	3.62	1.02	5.18	-0.223	-0.0836
3.29	1.65	0.113	0.936	0.396	1.28	-2.22	1.74	-0.401	1.19	2.96	5.72	0.173	-0.772	6.75	2.84	3.76	0.303	2.89	0.727	1.01
2.55	3.05	2.12	0.482	1.06	0.331	-1.36	3.29	-1.02	2.86	2.87	4.49	0.995	-0.0444	7.06	1.81	4.4	0.638	2.21	-0.0839	0.666
3.24	2.7	1.29	0.698	1.2	2.48	-1.77	0.947	-0.0887	1.73	3.45	2.5	0.16	1.15	6.57	2.28	4.07	-0.182	2.84	0.397	0.517
2.78	2.02	0.863	-0.183	-0.508	2.19	-1.61	3.22	1.46	3.74	3.47	2.27	1.08	2.66	6.74	2.54	4.8	0.115	2.04	-1.44	-0.0378
3.56	1.82	0.478	-0.0507	0.689	0.504	-1.67	0.776	2.68	4.51	4.02	1.62	2.48	3.09	7.08	2.05	4.88	-0.213	2.87	-0.135	0.456
2.94	1.31	1.67	0.429	0.547	1.42	-1.05	1.14	2.53	3.51	4.2	1.13	2.72	2.75	7.47	1.77	4.55	0.493	3.31	-1.34	0.0123
2.19	2.18	1.07	0.335	0.268	0.456	-1.77	-0.795	2.4	3.35	4.41	1.5	2.14	2.36	7.01	2.35	4.85	0.713	3.1	-0.769	0.355
2.16	2.44	0.144	-0.17	0.843	1.83	0.189	1.03	1.72	4.17	3.45	3.16	2.31	2.59	6.89	2.14	3.05	0.428	2.55	-0.428	0.232
0.443	2.55	-0.426	0.251	0.781	-0.172	0.226	0.757	1.97	4.89	3.17	2.43	2.54	2.45	8.35	2.5	2.96	0.501	1.72	-0.319	0.588
1.03	0.847	-0.396	-0.109	0.353	-0.36	0.177	1.61	1.24	3.01	3.19	3.38	1.96	2.47	7.68	1.36	2.46	1.14	2.43	-1.16	0.686
1.21	1.36	-0.438	0.115	1.7	0.776	-0.71	0.735	2.15	4.02	3.22	3.57	1.78	2.24	7.4	1.73	1.87	1.27	3.83	-1.24	-0.331
-0.45	1.46	0.686	-0.299	0.588	-0.116	-0.969	1.38	2.21	3.97	3.13	2.88	2.35	1.77	6.9	1.09	1.88	0.61	2.72	-0.33	0.331
0.77	1.95	1.84	-0.297	0.991	0.784	-1.25	0.779	1.72	3.26	2.51	2.23	0.758	2.5	7.53	1.76	2.06	1.31	3.54	-0.388	0.526
1.3	1.51	2.63	0.157	1.24	1.88	-0.874	0.653	2.67	4.83	2.03	1.95	1.64	3.01	7.74	1.37	2.17	1.11	4.14	-1.85	0.442
0.701	2.02	1.99	0.178	1.31	0.912	-1.04	1.92	2.74	3.23	1.74	1.32	1.19	3.71	7.73	1.57	1.39	1.56	2.68	-1.92	0.12
1.97	1.56	2.8	0.156	1.66	-0.243	-0.606	1.03	2.88	2.93	2.18	1.94	0.624	3.77	8.06	1.1	2.06	1.42	2.52	-0.675	0.747
-0.00177	2.55	2.87	0.0463	0.896	0.239	-0.724	-0.129	2.53	2.72	2.51	1.77	0.652	4.17	8.67	2.18	2.87	0.776	3.13	0.844	1.01
0.448	2.86	1.22	-0.113	1.61	1.5	-0.826	0.708	1.27	4.15	2.46	-0.0243	-0.398	3.92	6.49	1.77	2.63	0.904	4.36	-1.18	0.971
0.436	1.1	1.63	0.0178	0.529	0.543	-0.644	2.67	0.908	3.6	2.38	1.99	0.622	4.6	7.37	0.713	2.26	-0.0136	2.84	0.0018	0.248
-0.0575	0.0598	1.81	-0.454	1.03	0.909	-0.131	1.52	1.11	4.3	2.61	0.595	1.67	5.3	7.83	1.59	1.69	0.316	1.74	-0.0455	0.241
0.668	0.4	1.19	-0.129	0.232	1.49	0.377	2.69	0.443	1.96	2.87	2.97	0.246	4.52	8.84	1.38	2	0.0223	3.6	0.594	0.443
0.854	1.6	2.6	0.173	-0.83	0.544	0.152	1.23	0.834	4.42	2.78	1.66	-0.0928	4.13	7.98	1.79	2.01	-0.731	3.68	0.147	1.12
-0.175	1.42	1.06	0.278	0.989	0.622	-1.4	0.217	2.19	4.24	2.8	0.795	0.04	3.54	6.73	1.35	2.31	-0.751	3.16	-1.04	1.57
0.127	1.68	1.25	0.259	0.527	1.09	-2.12	1.84	2.95	3.76	3.54	2.62	0.0241	2.83	7.32	2.44	1.53	-0.782	1.58	-0.267	1.6
-0.166	0.649	1.52	0.536	0.0726	0.752	-2.84	1.55	3.31	3.2	4.27	2.13	0.882	1.66	6	2.12	1.8	-1.11	3.76	-1.29	1.89
0.877	-0.236	0.334	0.197	0.524	1.49	-3.29	0.797	3.24	3.97	4.04	2.79	1.28	2.13	5.86	0.559	2.32	-1.23	2.99	-1.99	1.89
-0.683	0.144	0.697	-0.206	-0.805	0.78	-3.8	0.454	2.75	4.57	3.36	1.29	1.8	2.38	6.81	2.99	2.89	-0.0692	1.8	-0.926	1.62
-1.55	0.664	1.08	-0.14	-0.159	1.81	-2.52	2.02	2.25	3.52	2.52	2.31	0.31	3.05	7.46	1.99	1.68	-0.873	2.6	-0.391	1.73
0.678	1.15	0.439	-0.241	0.143	0.582	-2.67	0.9	1.46	3.6	2.45	2.97	1.34	2.75	8.23	2.34	1.89	-0.166	3.83	-2.42	1.28
0.215	0.963	0.845	-0.201	0.0759	0.533	-2.55	1.08	0.761	4.27	1.94	3.05	0.0816	2.94	6.95	1.18	2.01	0.933	3.34	-0.462	1.78
-0.52	0.783	-1.3	-0.451	-0.478	0.328	-2.65	0.511	0.0653	3.6	1.63	1.45	0.844	3.11	7.44	2.1	2.68	1.73	3.35	-1.79	1.44
0.623	0.281	1.51	-0.51	0.857	-1.87	-2.2	1.2	-0.288	3.84	2.22	3.18	-0.0584	3.15	7.6	1.7	2.55	1.82	3.12	-1.98	1.43
0.276	0.0494	0.356	-0.149	0.0265	-1.16	-3.47	0.921	-0.338	3.35	2.72	1.67	0.651	2.4	8.12	2.4	2.07	2.62	3.7	-0.565	1.37
-0.0645	0.655	2.6	-0.446	-0.622	-0.773	-1.69	2.67	0.642	4.65	3.02	0.884	1.33	1.83	7.99	2.09	2.34	2.34	2.14	-1.04	1.3
-0.00713	-0.787	3.31	-0.756	0.369	-0.616	-0.631	0.504	-0.799	4.9	2.76	2.06	3.31	1.72	8.44	1.76	3.05	4.12	2.64	0.382	1.66
0.838	0.531	2.19	0.0188	-0.372	0.085	-1.29	1.01	-1.03	4.72	2.56	3.39	1.73	1.69	7.54	1.85	2.89	2.3	3.26	-1.79	1.42
0.629	0.556	0.674	-0.0142	0.091	-1.09	-2.05	-0.465	-0.851	4.63	2.29	2.62	1.11	2.89	7.88	3.24	2.33	2.42	2.71	-0.81	1.01
0.714	1.08	3.34	-0.304	-0.794	-1.65	-2.21	1	-0.00468	5.07	3.44	1.4	0.874	2.4	7.8	2.57	2.43	2	2.93	-1.45	1.39
0.515	0.358	1.64	-0.435	-1.28	-0.852	-2.2	0.447	0.367	5.87	3.57	1.81	0.432	2.54	7.69	3.2	3.79	2.32	2.34	-1.02	1.1
-0.158	-0.13	-0.181	-0.304	-0.421	-0.327	-3.3	0.547	0.518	5.12	2.43	3.15	2.5	3.26	7.88	1.91	3.64	1.96	1.67	0.693	1.47
-0.271	0.244	0.373	-0.261	-1.6	-0.679	-2.15	0.997	1.35	4.72	1.7	2.95	1.24	3.38	7.14	3.39	3.79	1.25	2.46	-1.65	1.33
-1.34	0.52	1.61	-0.831	-0.418	-1.25	-2.35	-0.034	1.13	6.5	2.85	1.42	0.699	3.19	8.42	3.57	3.61	1.02	2.5	-1.25	0.731
0.259	0.478	1.26	-0.843	-0.11	-0.55	-2.81	0.932	0.893	4.62	1.89	1.57	0.692	3.28	7.8	1.52	2.91	1.08	0.77	-0.504	1.52
-0.2	1.59	1.1	-1.17	0.109	-0.603	-2.46	1.41	-0.299	5.08	1.29	0.811	0.935	2.76	6.66	2.36	3.08	0.748	2.43	-2.17	0.686
-0.52	2.59	-0.0722	-0.922	-1.79	-1.56	-2.98	0.726	0.0392	3.74	1.3	1.92	0.0734	2.75	8.25	2.36	3.65	1.22	1.33	-1.61	0.485
0.0739	1.7	-0.58	-1.35	-0.233	-0.659	-3	-0.47	-0.324	4.81	1.29	-0.166	0.802	2.53	7.07	3.04	2.87	0.518	1.65	-1.04	0.614
0.751	1.41	-0.622	-1.01	-0.105	-1.4	-2.71	0.379	0.206	4.75	2.02	0.297	1.26	1.76	7.45	2.16	3.16	1.01	0.534	-2.56	0.3
-0.00506	1.11	0.117	-0.736	0.91	-1.14	-2.46	1.43	0.832	5.21	2.25	2.44	1.37	2.24	7.2	2.92	3.13	0.522	2.22	-2.53	0.593
-0.483	0.675	-0.424	-0.189	-0.914	-1.1	-2.89	1.2	1.69	4.86	2.03	0.337	1.67	1.92	6.4	2.17	2.72	1.34	0.719	-0.684	0.943
-1.49	0.101	1.07	0.0115	-0.281	-1.18	-2.63	0.35	0.641	3.94	2.97	2.26	1.61	2.34	5.63	1.67	2.76	1.02	3.21	-1.02	0.839
-0.249	0.887	-0.43	-0.677	-0.444	-0.619	-1.45	-1.02	1.61	5.1	2.86	1.03	1.43	1.98	5.7	2.36	2.65	1.26	2.28	-0.8	1.53
-0.116	0.461	-1.38	-0.565	-0.0893	-0.983	-2.94	-1.53	1.8	7.05	2.37	1.93	0.553	2.36	5.66	1.92	2.83	1.43	1.06	-1.09	1.71
2.06	1.12	-0.323	-0.356	0.523	-1.22	-3.01	-0.504	1.71	4.56	3.5	2.63	1.75	1.76	6.11	3.27	1.53	1.13	-0.551	-0.861	0.667
-0.542	0.317	-1.34	-0.483	1.02	-0.849	-3.39	-0.0202	2.06	5.09	4.51	1.21	1.84	1.49	4.4	2.38	1.79	1.37	0.223	-1.39	1.65
-0.166	0.185	-0.0849	-0.131	-0.0391	-0.27	-2.7	2.09	2.17	4.76	4.5	2.05	2.32	0.394	5.04	1.94	1.61	0.762	0.271	-1.26	1.86
-0.851	-0.0104	-0.66	0.128	-1.68	-0.222	-2.97	-0.37	2.61	5.17	4.07	2.27	1.76	0.935	5.74	1.67	1.96	1.08	1.39	-1.41	1.95
2.17	0.287	0.89	-0.402	-1.68	-0.949	-2.36	0.522	1.39	5.44	3.79	1.91	2.56	0.471	5.33	2.45	1.73	1.79	0.543	0.32	1.77
0.309	-0.609	1.83	-0.363	-2.21	0.388	-1.55	-0.107	2.83	5.28	3.46	0.103	0.937	-0.169	5.17	2.56	2.07	1.37	-0.192	-0.944	1.71
0.27	0.692	0.906	-0.57	-1	0.0947	-2.09	0.125	2.58	6.31	3.89	1.05	0.886	-0.392	5.89	1.86	1.95	1.64	1.35	-1.43	2.47
-1.06	1.37	0.0294	-0.485	-1.69	-1.1	-0.313	-1.36	0.927	5.54	5.29	1.65	0.183	-0.142	5.31	3.18	2.65	1.67	0.46	-1.07	2.2
-0.742	1.13	-0.0612	-0.687	-1.83	1.16	-0.566	-0.567	1.29	4.69	5.7	0.0282	0.267	0.448	4.44	2.95	2	2.94	1.57	0.234	1.82
-0.586	1.46	-0.897	-1.14	-0.403	0.33	-0.0243	-1.29	1.31	4.8	6.87	0.771	0.427	-0.133	6.25	2.7	2.11	2.04	2.47	-2.02	1.82
2.21	1.17	-0.532	-1.17	-0.596	0.178	2.49	-1.21	1.36	4.99	7.22	-0.893	1.09	-0.758	6.77	3.6	2.78	2.27	2.45	-1.16	1.7
2.16	1.08	-1.35	-1.06	-0.811	0.05	1.76	-0.976	1.16	6.13	6.6	1.5	1.96	0.0343	5.94	3.18	2.13	2.17	0.651	0.348	1.92
2	0.596	0.0387	-0.436	-0.895	-1.88	1.75	0.474	0.779	5.35	6.67	-0.132	0.643	0.83	4.75	2.72	3.1	2.47	2.08	-0.98	1.54
1.69	-0.652	-0.439	-0.797	0.458	1.1	1.3	0.117	0.903	7.02	5.77	-0.282	0.772	0.251	6	2.97	2.26	1.93	2.16	-1.81	1.88
1.46	-0.248	-1.41	-1.31	-1.88	-1.08	1.44	0.56	1.66	5.3	5.84	1.17	1.32	0.23	5.84	1.93	2.39	2.21	1.98	-0.833	1.28
1.15	0.999	-1.52	-0.899	-1.32	-1.4	1.01	-0.1	1.93	6.08	4.41	0.53	0.812	0.161	4.87	2.92	2.27	1.34	0.822	-0.756	2.34
1.77	1.27	-0.99	-1.25	0.1	-1.13	3.33	0.16	2.44	5.46	4.84	-0.206	1.34	0.482	4.86	3.17	2.23	1.06	2.02	-0.867	2.81
1.82	0.189	-0.207	-1.22	-0.272	-0.762	3.66	-0.91	1.14	6.79	4.46	0.597	1.15	0.199	4.75	3.2	2.6	1.11	1.19	-0.898	2.73
1.7	-0.0968	-1.52	-1.05	-0.748	-1.92	4.33	1.81	1.14	5.97	4.41	1.23	1.13	0.0552	5.14	3.07	2.53	1.59	-0.536	-0.278	3.5
1.66	1	-1.32	-1.13	-0.331	-0.786	3.19	0.813	0.628	6.01	4.57	-0.178	2.05	-0.319	5.13	4.54	2.31	1.04	-0.117	-2.48	3.01
1.4	0.0586	-0.895	-1.53	-1.13	-3.81	2.74	-0.29	0.331	5.75	4.84	0.0924	2.21	-0.181	4.84	2.78	2.76	1.44	1.2	-1.4	2.87
1.62	1.09	-0.211	-0.813	-0.419	-1.76	3.13	0.706	0.334	4.69	4.7	-0.567	0.516	-0.266	5.88	3.01	2.9	0.626	2.02	-0.892	2.43
2.89	-0.335	-0.261	-0.848	-1.26	-1.38	2.44	0.375	0.126	3.79	4.32	1.67	0.815	-0.0841	5.54	3.44	1.93	1.35	0.948	-1.96	2.36
2.49	0.477	-0.309	-0.329	0.211	-0.876	2.51	-0.84	0.00948	3.94	4.52	-0.522	1.68	0.277	4.87	3.86	2.3	0.708	-0.367	-0.18	2.69
1.78	1.99	-0.00837	-0.507	-0.181	0.549	2.93	-1.19	0.473	4.59	4.6	0.538	1.44	-0.126	4.76	3.48	3.13	1.13	0.43	-1.41	2.18
0.27	1.15	-0.822	-1.13	0.0847	0.568	2.69	0.0628	0.834	4.12	4.12	0.922	0.777	0.464	3.7	3.64	2.94	1.43	0.93	-1.07	2.42
-0.928	0.781	-0.745	-0.93	1.01	-0.872	3.43	0.603	0.366	3.75	3.37	0.268	1.21	0.834	4.41	4.15	2.56	0.957	1.52	-0.456	2.8
1.13	-0.193	-1.01	-0.267	-1.61	0.593	3.41	0.474	-0.359	4.71	3.53	0.478	1.47	0.632	4.39	3.62	2.27	1.06	1.48	-0.994	2.17
2.39	-0.689	-1.61	-0.131	0.317	-0.16	3.38	0.754	-0.0283	4.07	3.69	1.76	1.39	1.23	4.92	4.84	2.17	0.686	1.06	0.334	1.81
1.23	-0.378	-1.05	-0.18	-0.187	-0.223	3.84	0.634	2.34	5.76	3.82	1.63	0.903	1.51	5.17	3.65	2.31	1.08	-0.591	-2.52	1.21
0.0362	-0.144	-1.12	-0.536	0.0213	-0.803	4.03	-0.475	2.51	3.29	3.68	0.478	1.02	1.16	5.81	3.16	2.59	0.663	0.822	-0.948	1.53
-0.358	-0.459	-0.591	-0.802	-0.381	0.229	3.52	-0.477	2.24	2.87	4.56	-1.18	2.35	0.0801	4.68	4.03	2.56	1.26	0.59	-2.33	1.8
1.6	0.0791	-1.34	-1.39	-0.354	-0.588	2.85	-0.519	1.66	2.99	5.19	-0.155	0.908	0.639	5.06	3.56	2.8	1.2	0.457	-1.05	1.83
1.33	0.154	-0.256	-0.986	-0.132	-1.93	2.71	0.0116	2.09	3.55	5.14	0.961	1.09	0.972	5.75	3	2.64	1.57	1.32	-0.422	1.48
0.0067	0.394	-0.919	-1.16	-0.67	0.12	2.37	-0.524	1.22	3.02	5.55	0.713	1.89	0.612	5.26	4.06	2.02	1.08	-0.00183	-0.926	1.95
1.14	0.0336	-1.27	-1.23	-0.518	-1.3	2.57	0.11	3.01	4.68	5.98	-1.39	3.16	-0.0375	5.69	3.15	3.22	1.27	1.78	-2.01	2.09
0.969	0.157	-1.47	-1.33	-0.631	-1.26	1.76	1.27	2.11	2.84	5.76	-0.534	2.19	-0.281	6.62	3.43	2.33	0.649	0.095	-1.2	2.17
0.75	0.229	-0.607	-1.33	-0.192	-1.23	2.81	0.642	0.12	1.85	4.94	0.223	1.53	-0.315	5.4	4.28	2.57	0.228	0.828	-0.621	1.88
0.871	-0.142	-1.75	-1.27	-0.88	-1.37	1.97	-0.742	0.076	3.09	4.74	0.342	1.67	-0.699	4.76	2.9	2.82	0.305	0.659	-1.27	1.98
1.32	-0.162	-3.13	-1.49	-0.498	-1.3	1.79	0.239	1.23	3.26	4.77	1.6	3.05	-0.937	5.08	3.85	2.71	0.388	0.876	0.255	1.53
1.58	0.583	-0.92	-1.04	-1.9	-1.05	1.03	0.555	1.73	2.92	5.1	0.751	2.34	-0.389	4.89	3.74	2.47	0.458	1.13	-0.628	1.81
1.82	-0.811	-0.46	-1.68	-1.11	-1.96	1.85	0.74	2.92	3.9	5.24	0.876	1.97	-0.688	5.34	4.57	2.42	1.49	0.709	0.686	0.984
2.7	-0.116	0.274	-1.56	0.619	0.153	2.05	0.0754	1.62	4.01	5.05	0.17	1.52	-0.0975	4.4	2.94	2.69	0.901	0.403	0.733	1.4
2.34	-0.897	-0.154	-1.43	-1.64	-0.0574	1.18	1.04	2.52	2	5.08	0.993	2.1	-0.986	3.34	3.35	2.83	0.18	-0.52	-0.0859	1.42
-0.767	0.661	-0.975	-1.44	-0.798	0.00102	1.76	1.23	3.6	3.02	4.89	1.63	2.19	-0.713	3.94	3.53	2.23	-0.225	1.01	-0.906	1.68
0.842	0.959	-1.05	-1.14	-0.64	-0.656	1.59	0.886	2.45	1.94	5.26	0.465	1.71	0.151	4.24	2.78	2.23	-0.102	0.819	-2.03	1.19
1.39	0.428	-1.58	-1.25	-1.01	-2.89	2.72	-0.897	1.98	2.72	5	1.03	1.55	1.02	3.9	3.01	2.31	-0.18	0.472	-0.529	1.07
-0.767	0.0438	-1.95	-0.886	-1.96	-1.92	2.45	2.46	2.11	3.32	5.05	0.358	1.77	1.28	4.22	2.93	1.6	-0.393	-0.732	0.0304	1.34
-0.0904	-0.263	-1.21	-0.66	-0.111	-1.19	2.51	2.58	2.35	2.03	4.5	0.412	1.62	2.11	3.9	2.88	1.71	0.997	-0.291	1.46	1.57
0.186	-2.16	-1.86	-0.78	-0.519	-0.894	3.1	3.49	2.43	1.51	4.41	0.0848	1.66	1.42	4.13	2.99	2.29	0.423	-0.69	-0.351	1.6
-0.786	-2.84	-0.604	0.267	0.758	-0.54	3.53	5.09	1.66	2.79	4.82	2.15	1.89	1.73	2.68	4.39	2.34	0.868	0.911	-1.07	1.86
-1.21	-1.36	0.0123	0.151	-0.0457	0.732	3	5.93	2.43	2.18	4.38	1.58	0.764	1.57	2.86	4.6	2.2	0.28	0.734	-0.815	1.93
0.629	-2.39	0.0348	0.616	-1.8	1.6	2.84	5.08	2.71	0.27	3.98	2.04	2.72	1.45	4.41	2.89	2.61	1.47	0.722	0.371	0.775
-0.844	-1.84	0.668	0.746	-1.21	-0.352	2.57	7.44	2.29	3.48	3.56	1.76	1.98	0.343	3.77	4.99	2.45	0.56	-1.44	0.0473	0.82
0.00267	-2.17	0.481	0.253	0.296	0.748	2.5	5.98	2.15	2.19	4.4	1.89	1.88	0.595	3.53	4.15	2.35	2.05	-1.48	-0.329	1.41
0.373	-1.52	1.53	-0.105	0.789	0.664	2.13	6.3	2.03	2.41	4.17	1.43	4.13	1.15	3.82	4.28	2.45	1.75	-0.657	-1.8	0.745
-0.988	-1.01	0.159	-0.494	-0.252	-0.82	2.25	4.57	2.79	2.36	3.63	1.6	3.41	0.706	4.44	3.76	2.19	2.1	-0.696	-1.1	0.203
-0.198	-0.75	0.665	-0.365	1.08	-0.367	2.28	6.36	1.68	1.94	3.9	-2.99	3.45	0.664	4.7	4.32	2.41	1.27	0.769	-1.02	0.415
-1.84	0.651	0.148	-0.794	-1.23	0.934	2.52	5.97	1.28	4.23	3.63	-0.191	2.54	0.863	4.13	3.87	2	0.424	-0.539	-0.999	0.107
-0.62	0.552	-0.114	-0.732	-0.224	2.84	2.54	6.12	0.609	3.12	3.58	-1.76	2.83	1.16	3.9	3.36	1.92	0.173	0.608	0.878	0.0694
-1.55	0.055	0.101	-0.515	-0.783	0.909	0.862	4.58	0.117	2.78	3.27	2.09	1.81	1.57	4.64	4.09	2.17	-0.0406	-1.21	-0.196	0.372
-1.08	-0.451	1.49	-0.669	-0.7	1.61	1.39	4.79	0.0391	4.05	3.11	0.32	2.76	1.74	3.6	3.48	2.26	0.393	-1.37	2.13	0.47
-0.459	-0.608	1.63	-0.943	-0.463	0.982	0.568	4.11	-0.05	4.24	3.12	-1.47	1.87	0.354	3.22	3.67	2.27	0.306	-0.176	-0.0339	-0.329
-1.23	-1.23	1.5	-0.565	0.453	1.53	0.832	5.59	0.901	3.37	3.06	-1.69	1.73	0.0827	3.07	3.93	2.14	0.725	1.1	-1.1	-0.0563
-0.355	0.0346	0.178	-0.855	-0.507	2.66	1.36	5.57	0.247	3.47	2.79	0.638	2.14	0.971	3.08	4.57	1.9	0.391	0.526	-0.559	-0.364
-1.05	0.0787	0.818	-0.854	-0.146	1.71	1.38	5.85	-0.17	5.25	2.25	-0.295	0.993	0.196	3.2	3.55	1.5	1.17	0.874	-1.35	-0.234
-1.16	0.358	1	-0.561	-1.52	0.493	0.415	5.21	0.777	2.95	2.06	-0.919	1.25	-0.596	2.81	5.38	2.26	0.584	0.511	-1.64	-0.391
0.32	0.058	1.2	-0.553	-0.171	0.043	0.181	6.07	1.04	2.48	1.94	0.706	0.972	-0.162	1.57	3.76	1.97	0.884	0.316	-2.68	-0.682
-0.362	-0.437	1.45	-0.0628	-1.64	1.73	0.0889	5.89	2.75	2.8	2.46	-0.983	1.06	0.355	1.69	3.64	2.2	1.06	0.185	-0.917	-0.168
0.0923	-0.319	0.992	0.684	0.0992	0.672	-0.534	4.39	2.2	1.87	2.49	0.749	1.91	0.74	3.23	3.1	1.35	0.877	0.28	-2.36	-0.373
1.82	0.405	0.754	-0.253	-0.548	0.846	-0.0336	6.02	1.28	3.62	2.47	1.37	1.6	1.49	2.94	3.22	1.94	0.452	0.773	-1.67	0.347
-0.126	-0.714	1.55	-0.083	-1.15	1.95	-1.05	5.25	0.974	1.83	2.58	1.12	0.446	0.974	3.22	2.97	1.72	-0.572	-0.637	-1.74	0.383
0.0915	-0.0959	2.66	0.0485	1.51	1.4	-0.191	4.34	1.88	3.15	3.3	0.932	0.0539	0.547	2.44	3.3	2.38	0.113	0.334	-2.28	0.121
-1.46	-0.91	1.37	0.523	0.742	0.459	-1.68	4.73	2.24	2.37	2.54	0.858	0.895	-0.246	2.43	4.41	2.41	-0.0042	-0.57	-1.71	0.149
-0.742	-0.718	1.27	0.231	0.805	0.911	-1.44	4.45	2.14	3.43	3.3	-1.66	0.299	-0.992	4.41	3.3	2.68	-0.139	-0.616	1.2	-0.199
-0.766	0.511	1.18	0.282	-0.00772	2.14	-1.9	4.07	2.38	2.92	3.14	0.695	1.26	-0.974	3.27	4.68	2.14	0.0833	-0.18	0.15	0.327
-0.527	-0.637	1.71	0.447	-1.12	1.1	-2.2	4.74	1.25	0.624	3.88	0.216	1.6	-0.711	2.58	4.23	2.43	0.856	0.347	-0.559	0.126
0.0779	-1.82	2.48	0.397	0.0885	2.19	-0.833	3.8	1.33	3.19	4.2	-0.332	-0.495	-0.619	3.54	3.5	2.23	0.244	-0.0442	-1.83	0.00799
0.641	-1.3	1.07	0.481	-0.258	1.79	-0.465	4.48	2.31	3.01	3.16	-0.785	-1.54	-0.871	2.85	3.65	2.17	0.373	1.12	-1.01	0.313
-1.21	-1.6	-0.274	-0.0497	-0.125	1.3	-1.13	4.14	1.34	2.63	3.59	-3.4	-0.00014	-0.651	2.44	4.13	2.1	0.329	-1.5	-1.71	0.122
-1.9	-1.57	0.123	0.6	-0.742	0.768	-1.43	2.79	0.752	3.31	3.38	-0.706	0.496	-0.328	3.21	3.17	2.46	-0.121	0.411	-0.835	-0.138
-1.75	-2.84	-0.987	0.969	1.98	2.47	-1.58	3.16	0.189	2.51	3.25	0.234	1.61	-0.558	1.74	3.38	2.29	0.72	-1.2	-0.461	-0.396
-2.04	-1.24	0.334	0.48	1.87	1.55	-1.16	4.6	0.709	1.99	2.98	-0.336	0.265	-1.61	4.71	3.86	2.51	0.122	1.2	-0.853	-0.806
-2.9	-1.35	-0.284	-0.25	0.651	1.22	-0.41	3.44	0.146	4.16	3.08	0.735	1.39	-0.835	3.99	3.19	2.35	-0.267	2.05	-1.63	-1.19
-0.902	-1.67	0.709	0.0237	1.08	1.72	0.705	2.83	-0.00511	3.08	3.09	0.205	1.75	-0.28	3.94	3.32	2.66	0.247	0.673	-3.2	-0.131
-1.87	-1.66	1.38	0.234	0.422	1.4	0.752	1.96	-0.42	2.29	2.92	1.63	1.4	-0.777	3.02	3.93	2.39	-0.659	-0.156	-1.61	-0.652
-1.17	-2.48	0.57	0.522	-0.0817	-0.0181	1.29	2.44	-1.08	4.07	2.61	0.711	1.56	-1.83	4.16	4.46	2.22	-0.393	-0.479	-0.323	-0.774
-0.244	-2.3	0.367	0.255	1.43	-0.0967	1.54	3.48	-0.403	2.29	2.83	0.733	1.51	-1.7	4.51	3.75	2.85	-0.647	-0.335	-1.43	-0.899
-0.921	-2.14	0.718	0.652	-0.384	-0.111	1.81	2.31	0.43	4.55	3.12	-0.47	0.319	-2.07	4.86	2.65	2.64	-0.706	-1	0.0526	0.0535
-1.04	-2.2	0.45	0.537	0.812	-0.922	1.81	1.9	1.48	2.38	2.98	0.362	1.83	-1.4	4	2.64	2.97	-0.751	1.09	-2.86	-0.265
0.157	-3.06	0.79	0.843	0.603	0.479	2.26	2.08	0.0747	5.12	3.26	-0.268	0.925	-1.5	4.51	3.77	2.05	-1.35	-0.38	-1.93	0.282
-0.168	-2.97	1.94	0.833	-0.603	-0.477	3.66	2.26	-1.15	3.01	3.57	0.772	1.69	-1.4	3.96	2.72	2.2	-0.69	-2.65	-1.45	1
-0.626	-1.98	0.551	0.874	0.275	-0.229	2.47	2.62	-0.752	0.705	3.72	0.897	1.26	-0.571	3.17	2.62	2.3	-0.924	-1.31	-1.1	0.656
-0.78	-1.77	-0.66	0.416	1.27	-0.902	2.99	2.66	-0.441	3.8	3.15	0.0059	0.381	-1.14	3.66	3.19	2.13	-0.924	-1.97	-0.481	0.0928
0.137	-1.14	0.396	0.569	0.26	-0.396	2.16	2.66	-0.0594	2.53	3.21	0.316	0.325	-0.846	3.34	2.5	2.81	-0.11	-0.85	-1.52	0.52
-2.02	-0.213	-0.591	0.821	1.4	0.296	1.55	1.66	0.972	0.989	3.59	0.168	2.36	-0.546	2.75	3.4	2.66	-0.551	-0.204	-1.19	0.816
-2.07	-0.193	0.259	1.17	-0.656	-0.844	1.19	3.3	-0.597	2.12	3.3	1	-0.471	-0.562	1.94	3.84	2.63	-0.217	-0.484	-0.142	0.0713
-1.31	-0.434	1.25	1.13	0.509	-1.48	-0.254	1.13	-1.12	2.49	4.65	-0.156	1.66	-0.188	3.85	3.18	2.6	-0.196	0.633	0.31	0.505
-0.547	-0.793	0.256	1.14	0.206	0.548	0.271	1.33	-0.736	2.76	5.12	-0.228	2.39	-0.106	2.73	3.92	2.5	0.379	0.814	-0.652	0.265
-0.896	0.387	-0.64	0.892	1.06	-0.417	-0.741	1.99	-1.16	3.5	5.36	-1.33	1.18	-0.669	4.82	4.9	2.6	0.783	0.582	-1.49	1.49
-1.49	-1.09	-0.551	0.674	0.269	-1.22	-0.978	2.93	-1.43	1.35	5.28	-1.21	2.23	-0.14	3.56	4.9	2.57	0.694	-0.275	-1.26	1.51
-0.591	-1.08	0.0673	0.653	0.708	-0.00464	-1.33	2.24	0.111	2.34	5.07	-0.337	1.4	-0.574	3.29	5.62	1.84	0.844	-0.547	-2.03	1.4
-1.2	-0.238	1.11	0.759	1.01	1.44	-2	2.19	-0.42	3.53	5.01	-1.05	1.65	0.423	2.1	6.36	2.1	1.4	-0.0937	-3.67	1.32
-0.755	0.229	1.65	0.654	-0.264	0.815	-1.16	2.2	0.257	2.71	3.27	0.686	1.36	0.0142	1.06	6.43	2.02	1.01	0.367	-0.511	1.31
-1.85	0.0761	-0.543	0.216	1.53	1.55	-1.13	0.344	0.215	4.7	3.67	-0.146	1.66	0.927	2.61	6.08	1.93	0.317	-0.636	-0.786	1.44
0.415	0.261	0.535	0.105	0.245	0.256	-1.72	1.65	0.437	3.39	3.91	-0.802	1.51	0.411	2.43	4.57	2.28	0.195	-0.995	-3.42	1.04
-0.694	0.125	0.84	-0.126	-0.503	1.33	-1.38	1.37	1.31	3.53	3.38	0.0333	1.52	0.78	2.5	4.91	2.4	-0.067	-1.55	-3.13	0.84
-0.669	-0.53	-0.147	-0.325	-0.62	1.78	-1.88	1.6	1.93	2.25	3.02	-1.56	3.13	-0.0558	1.17	6.92	2.22	0.00728	-2.14	-1.63	1.75
0.824	-0.474	0.509	-0.66	1.26	-0.229	-1.6	2.63	0.362	2.37	2.68	-1.68	2.49	-0.00779	0.657	5.81	2.01	-0.326	-0.747	-2.65	1.25
-0.187	-0.979	0.866	-0.234	0.41	0.786	-0.726	2.99	1.47	2.68	1.73	-0.179	1.2	0.816	0.371	5.59	2.24	-0.472	1.2	-0.918	1.03
-0.818	-1.21	-0.486	-0.253	-0.203	-0.371	-1.38	1.58	1.98	2.31	1.46	0.592	1.39	2.28	0.119	4.37	2.15	-0.743	-1.52	-1.71	1.35
-2.47	-1.64	0.649	-0.337	-1.33	-1.42	-1.22	1.67	0.365	1.53	1.19	1.35	1.19	1.76	-0.248	5.94	3.26	-1.5	-0.342	-2.22	0.489
-1.27	-0.653	-0.235	-0.411	0.248	-1.59	-0.341	1.52	-0.00999	2.69	1.94	-0.348	0.883	1.17	-0.36	5.79	2.36	-1.82	-1.8	-1.17	0.534
-1.76	-0.395	0.927	-0.664	-1.03	-2.04	-0.475	0.294	-0.67	3.2	2.43	-0.264	1.62	1.18	0.672	6.1	2.84	-1.78	-1.65	-2.45	1.07
-1.69	-1.41	0.261	-0.586	-0.341	-0.991	-0.81	2.33	-2.51	2.57	2.25	-1.67	3.19	0.768	-0.202	6.86	2.58	-1.96	-1.92	-1.01	0.231
-0.193	-1.08	-1.83	-0.923	-0.711	-0.463	-0.264	2.47	-1.78	2.83	2.85	-0.376	3.02	1.65	-0.499	6.11	2.58	-1.8	-0.805	-0.862	0.107
0.803	-1.37	0.653	-0.827	0.0905	-0.944	0.114	2.11	-1.69	2.07	3.01	-1.61	3.01	3.03	-0.574	5.14	2.02	-2.27	-0.0204	0.186	0.666
0.868	-1.21	-0.102	-1.12	-0.355	-1.45	-1.2	1.47	-2.53	0.722	2.74	-0.533	2.76	3.03	-1.06	6.7	2.63	-1.22	-0.891	0.408	1.24
-0.191	-1.45	-2.4	-1.55	-1.22	0.347	-0.639	1.66	-1.9	1.74	3.21	0.576	0.514	2.67	-0.414	6.81	1.59	-1.31	-0.357	-1.37	1.07
-0.275	-1.78	-1.52	-1.96	0.0795	-1.19	-0.536	3.07	-1.13	2.77	3.51	0.574	-2.39	2.59	0.758	5.67	2.61	-1.81	-1.56	-0.726	0.618
-0.656	-1.18	-1.24	-1.72	-0.412	-1.71	-1.03	0.0238	-2.19	2.56	3.77	-0.568	-0.407	2.19	-0.372	6.6	2.4	-1.35	-2.29	-1.28	1.55
0.731	-1.49	-0.149	-2.1	-1.69	-0.17	-1.01	1.89	-1.91	2.69	3.87	-0.538	-1.09	3.01	0.505	6.99	2.93	-0.875	-0.357	-1.11	1.36
2.39	-0.668	-1.5	-1.82	-1.48	-0.675	-0.582	0.64	-1.78	3.41	3.47	0.199	0.449	3.01	-1.23	4.7	2.78	-0.569	-0.602	-2.62	1.2
1.71	-0.479	-0.763	-1.98	-1.52	0.178	-0.0703	1.58	-2.29	0.241	4.42	-0.794	-0.82	3.5	-1.79	6.08	2.62	-1.2	-0.951	-1.89	1.4
0.847	-0.593	-0.416	-1.99	-2.11	-0.664	0.0961	3.22	-1.02	1.7	4.48	0.847	0.00775	2.98	-1.39	5.24	2.16	-1.45	-1.49	-1.89	1.72
-0.45	-0.439	-0.55	-2.14	-0.219	1.91	-0.226	2.39	-1.31	0.885	3.7	0.265	-0.967	2.6	-1.57	4.68	2.06	-2.06	-1.98	0.0511	1.33
-0.726	0.75	-0.234	-2.06	-2.05	0.0517	-0.842	2.47	-1.25	0.972	4.3	-1.79	0.905	3.99	-0.861	3.17	2.72	-2.44	-0.619	-2.21	0.871
-0.795	0.0135	-0.401	-2.26	-1.96	1.03	-0.375	0.649	-0.177	1.53	4.46	-1.85	0.304	4.07	-1.38	4.27	2.43	-2.22	-2.05	0.353	1.33
-0.00317	0.998	-1.81	-2	-0.572	0.299	-0.576	2.21	-0.32	0.815	4.44	0.595	0.633	2.93	-0.565	4.29	2.17	-1.5	-1.45	-1.34	1.21
-1.12	0.0958	-0.739	-2.37	0.602	-0.0356	-1.22	1.14	-0.261	1.01	3.92	0.862	0.727	2.79	-0.578	4.12	2.24	-1.99	-0.291	-1.76	1.4
-0.798	-1.25	-1.73	-2.4	-0.296	0.179	-2.02	0.821	-0.967	1.13	3.53	0.527	1.76	2.43	-0.187	6.1	1.81	-2.41	-0.961	0.491	1.64
1.53	-1.7	-1.19	-2.25	-0.382	0.395	-2.04	1.96	-0.905	1.07	3.6	0.432	0.687	2.43	-0.582	3.61	1.56	-2.28	-0.782	-0.424	1.75
0.0538	-1.41	-1.14	-1.96	-0.35	0.0854	-1.88	2.46	-0.731	1.85	4.02	0.393	0.471	2.25	-0.191	4.13	2.26	-0.992	-1.26	-2.45	1.78
0.342	-1.17	-1.66	-1.91	0.217	0.244	-1.41	0.802	-0.831	0.849	3.4	-0.384	1.2	2.48	0.0647	3.26	1.24	-0.623	-2.92	-1.2	1.63
0.896	-2.3	-0.331	-1.83	-1.34	1.12	-2.2	1.21	-2.3	0.128	3.58	0.0819	1.8	2.35	-0.362	4.95	1.84	-0.637	-1.03	-1.2	1.5
0.9	-2.03	-0.781	-1.7	0.363	-0.45	-2.65	0.616	-1.5	0.00531	3.1	-0.864	0.333	1.92	-0.275	3.84	1.91	-0.746	-1.1	-1.56	1.26
2.4	-1.48	-0.579	-1.41	-1.45	-1.77	-1.41	0.812	-0.0523	1.35	2.4	-0.742	-0.921	1.15	-0.964	3.58	2.03	-0.887	-0.249	-0.977	1.12
1.16	-1.58	-0.151	-1.64	0.468	-0.5	-0.895	0.713	1	0.141	2.29	-1.85	-1.02	1.52	-1.01	3.66	2.18	-0.227	0.614	-0.19	1.42
1.53	-2.25	-0.712	-1.9	-2.08	-1.14	-1.61	0.181	1.62	1.48	3.19	0.0262	-0.0322	1.26	-0.418	2.94	1.79	-0.0401	0.148	1.06	1.13
0.936	-2.93	-0.73	-2.02	-0.381	0.25	-1.85	0.922	2.32	2.22	3.98	0.431	1.49	0.91	-1.08	2.23	1.34	0.415	-1.32	-0.851	1.35
0.163	-1.95	-1.02	-2.59	-1.28	-1.2	-1.49	1.56	1.39	2.64	4.06	-0.685	2.32	0.564	-0.942	3.91	0.911	0.137	-0.352	-0.436	1.05
1.04	-2.42	-1.07	-1.97	-0.999	0.378	-1.53	1.95	0.57	2.84	4.56	-2.09	1.62	0.186	-1.21	2.76	1.23	-0.0654	-0.202	0.529	0.996
1.67	-2.38	-0.395	-1.3	0.266	0.106	-0.112	0.239	0.554	2	4.98	-1.11	0.125	0.137	-0.224	2.13	1.34	0.595	-0.707	-0.971	0.843
-0.282	-2.68	-0.963	-0.76	0.205	2.42	-0.127	-1.47	0.493	0.162	4.18	-0.348	0.805	1.25	-0.64	1.6	1.25	1.04	-0.584	0.215	0.831
2.29	-2.41	-1.35	-1.05	-1.67	0.256	-0.944	0.622	0.924	3.17	4.09	-1.98	-0.0422	1.48	-0.608	4.09	1.72	0.733	0.153	0.712	0.441
-0.41	-1.43	-1.44	-0.391	-0.471	0.996	-1.01	-0.0925	-0.209	3.12	3.19	-1.56	1.74	0.774	-2	4.27	1.18	0.787	-1.65	-0.25	0.937
0.623	-1.57	-1.47	-0.78	0.607	0.84	-0.336	-0.374	1.05	1.61	3.64	0.546	1.93	-0.808	-1.9	4.86	1.25	0.968	-1.35	0.729	0.285
1.11	-0.198	-2.19	-1.05	0.519	0.81	-0.739	0.264	0.982	1.32	3.22	1.01	2.03	-1	-0.0803	4.7	1.52	-0.295	-1.08	1.74	0.816
2.04	-0.421	-3.34	-0.919	-1.31	2.1	-0.479	2.18	1.76	0.909	2.4	-1.56	1.54	-0.629	0.583	5.53	1.39	0.354	-1.84	0.633	1.91
1.38	-1.15	-3.8	-0.877	-1.01	1.87	0.52	0.697	0.94	1.75	3.23	-1.36	2.05	-0.0829	0.912	6.16	0.827	0.39	-0.321	0.482	1.49
0.861	-0.537	-1.64	-1.41	-1.05	1.62	0.53	1.82	0.36	1.72	3.06	0.754	2.06	0.0705	-1.37	6.65	0.222	0.499	-1.53	0.651	1.3
1.03	-1.98	-0.588	-1.64	0.876	0.244	0.377	0.0219	-0.271	0.0932	3.6	0.406	2.11	-0.391	-0.062	5.24	0.921	0.513	-0.111	-1.75	1.13
1.53	-1.77	-0.986	-1.97	0.221	1.12	-1.03	-0.652	-0.34	2.4	3.22	-1.79	2.8	-0.312	-1.7	4.98	1.04	0.994	0.586	-1.35	1.47
0.888	-1.95	-2.29	-1.92	-0.785	2.03	-1.14	-0.901	0.233	0.808	2.61	-0.797	0.148	0.767	-1.54	4.03	1.62	0.0524	-1.5	0.0437	0.931
1.78	-1.86	-1.03	-1.69	-0.836	1.73	-0.936	-0.664	0.814	1.03	3.03	0.0202	2.81	1	-0.742	5.21	0.765	-0.458	-0.848	-0.753	0.839
1.17	-1.65	-0.386	-0.99	0.00073	1.98	-0.163	1.27	0.667	0.524	3.75	0.139	1.01	0.606	-1.37	4.61	0.351	0.551	0.977	-1.1	1.98
1.03	-1.97	-1.91	-0.525	-0.788	2.94	0.786	0.223	0.89	1.9	4.01	-1.34	1.92	0.472	-1.32	4.31	0.481	1.05	-0.447	-0.403	2.22
2.82	-1.22	-1.12	-0.0799	-0.212	0.56	0.239	-1.32	0.527	0.471	4.14	-0.319	2.57	-0.144	-1.12	4.98	0.937	1.71	-1.84	-0.74	1.31
1.74	-1.02	-0.261	-0.0109	0.455	1.6	0.951	-0.87	1.02	1.68	4.02	-1.05	1.54	-1.01	-2.69	5.07	0.616	1.54	-1.34	0.66	1.75
0.147	-1.2	-0.303	-0.411	-1.02	-0.0133	0.202	0.188	0.254	3.03	4.01	-1.83	0.278	-1.97	-2	3.52	1.13	1.46	-2.72	0.57	2.01
0.608	-1.49	-1.44	-0.42	0.45	1.07	-0.82	-0.403	0.657	2.25	4.05	-0.901	1.28	-1.57	-2.83	2.24	1.76	0.801	-0.287	-0.708	1.96
0.0945	-1.26	0.0972	-0.814	0.911	0.432	-1	-0.584	0.612	2.66	4.29	-2.08	3.39	-2.04	-1.56	1.9	1.54	0.417	-0.82	0.0708	2.03
-0.168	-1.28	-1.15	-0.476	0.63	1.65	-1.33	0.593	0.856	2.54	3.97	-1.63	1.92	-1.76	-1.27	2.03	1.23	1.1	0.0274	-0.553	1.96
0.865	-1.08	-3.51	-0.113	-0.355	1.7	-0.829	-0.651	1.28	2.2	4.19	-1.45	3.49	-1.41	-1.13	2.1	1.25	0.593	0.083	1.35	1.89
0.0304	-1.08	-2.4	0.594	2.21	0.848	-1.24	0.18	0.996	1.98	4.45	-1.01	1.37	-0.802	-1.08	2.14	1.85	-0.127	-1.13	1.34	1.35
1.87	-1.08	-1.26	1.51	0.979	1.19	-0.727	0.386	0.256	0.929	4.12	-0.748	1.31	-0.748	-0.0677	1.05	1.43	0.268	-1.07	1.39	1.39
0.567	-1.11	-0.756	1.74	0.413	1.76	-0.726	-1.92	-0.153	3.37	4.11	0.378	1.71	-0.436	-0.489	4.01	0.745	1.67	-1.67	0.803	1.53
0.547	-1.41	-1.65	1.7	0.743	1.17	0.269	-1.95	-0.949	3.58	3.7	-1.3	1.29	-0.891	-1.06	5.85	0.847	1.04	-0.24	1.68	0.972
1.04	-1.3	-1.82	1.04	0.536	-0.2	-1.78	-0.361	-0.918	2.55	3.31	0.0589	1.53	-0.808	0.332	5.45	0.415	1.59	0.00211	1.22	0.885
0.618	-1.53	-3.34	1.1	-0.0116	0.247	-0.341	-0.805	-0.638	1.7	3.5	-0.0768	0.786	-1.1	-0.263	5.29	1.4	1.44	-0.0339	1.83	1.26
-0.0716	-1.66	-1.77	0.877	0.167	0.864	-0.635	-0.606	-0.525	2.57	3.22	-0.775	0.939	-0.61	0.632	5.23	0.682	0.527	-1.26	0.351	1.9
0.698	-2.61	-1.14	0.583	-0.74	1.15	0.325	-0.114	-1.31	0.708	2.98	-2.94	2.88	-0.111	-0.623	5.87	1.85	0.862	-1.45	0.246	2.35
1.87	-2.54	-1.05	0.829	-0.432	1.5	1.39	-0.326	-0.339	2.26	2.74	-2.56	2.37	-0.857	-0.386	5.84	1.38	1.71	-0.753	-0.283	2.34
1	-1.96	-0.234	0.451	-0.483	2.23	1.46	0.0186	0.709	2.83	2.95	0.000255	2.37	-0.868	0.865	5.34	2	0.868	-0.545	-1.34	2.33
0.677	-1.6	-1.38	0.0905	0.755	1.86	1.48	-0.0767	-0.116	1.77	2.82	-0.372	0.817	-0.692	0.677	4.24	1.35	1.57	-0.422	-0.569	3.52
0.465	-2.74	-2.13	0.523	-0.322	0.5	1.11	-0.848	-0.213	1.34	2.3	-1.95	0.576	-0.906	1.21	5.22	2.15	0.735	-0.122	0.517	4.48
1.13	-2.32	-1.24	1	-0.133	0.0867	0.937	0.119	0.658	1.41	2.62	-1.09	0.828	-0.449	0.55	4.6	1.48	0.748	-0.773	-0.251	5.34
1.8	-1.57	-1.58	2.36	-2.49	0.389	0.898	0.495	2.86	0.126	2.23	-1.68	1.48	-0.312	0.0938	3.07	1.14	0.636	-1.23	-0.0707	4.85
1.86	-2.41	-1.58	2.77	-0.753	-0.649	1.18	-1.78	1.94	1.92	2.97	-2.38	2.91	-0.743	-0.383	3.35	2.3	1.69	-0.188	1.33	4.91
1.56	-2.37	-1.94	2.27	-1.76	-0.47	0.75	0.215	2.01	1.68	2.53	-1	2.47	-0.452	0.518	4.61	1.13	1.32	-0.994	0.795	4.54
1.05	-1.68	-0.844	2.02	-1.94	-0.307	0.626	0.193	1.81	1.37	2.51	-2.01	0.657	-0.0771	0.992	3.67	1.43	0.58	-2.45	-1.83	4.11
1.33	-1.06	-1.32	0.703	-1.28	0.545	0.412	2.23	2.39	0.552	2.99	-1.56	1.15	-0.282	3.42	4.94	1.69	1.05	-1.02	1.15	4.36
1.3	-0.758	-1.42	1.15	-1.64	-0.091	0.375	0.112	2.61	0.904	3.43	-1.34	0.404	-0.0256	2.03	3.37	1.59	0.724	-0.736	0.551	4.43
3.99	-1.16	-0.844	0.631	-1.9	0.423	1.27	1.01	1.06	-0.717	3.9	-2.29	1.21	0.281	1.09	2.82	2.51	0.791	-0.628	-0.216	4.46
3.25	-1.1	-2.51	0.737	-0.368	0.987	0.315	1.31	3.08	0.276	4.34	-1.51	0.672	0.501	0.642	2.58	2.45	0.0562	-0.247	0.165	4.72
3.67	-1.68	-3.58	0.749	-1.24	1.64	-0.0879	1.16	1.68	1.12	4.57	-1.06	0.999	0.0202	1.79	2.5	2.92	-0.44	-1	1.34	4.56
2.72	-1.36	-3.91	0.6	-0.862	2.8	-1.14	0.824	-0.211	-1.47	3.74	-1.31	1.47	0.319	2.53	3.71	3.54	-0.883	-1.68	0.0696	5.17
3.45	-1.27	-1.98	0.562	-0.0878	1.45	0.173	-0.532	0.605	0.763	3.02	-1.67	1.45	-0.026	3.39	2.01	3.2	-0.803	-2.3	0.0947	4.5
3.93	-1.95	-1.79	0.532	-1.74	2.34	0.53	-0.393	-1.11	0.21	2.96	-1.44	1.78	0.126	3.2	1.44	3.34	-1.56	-1.98	1.66	4.78
7.13	-2.31	-2.76	0.148	-1.29	0.476	0.127	0.652	-0.699	0.456	2.46	-2.68	0.403	-0.538	2.17	1.95	3	-0.877	-2.04	2.4	4.53
6.8	-1.12	-2.12	0.132	-0.652	1.51	-0.426	-0.136	-0.626	1.14	2.24	-2.27	1.05	-0.897	3.41	2.2	2.8	-0.317	-0.705	1.56	5.28
6.47	-0.467	-1.76	0.148	-1.48	-0.493	0.188	1.74	-0.546	-0.282	2.48	-1.99	0.467	-1.24	2.5	0.921	2.1	-0.689	0.138	1.98	4.83
6.26	0.901	-1.51	0.184	-1.95	-2.38	0.289	1.18	-0.718	0.184	2.75	-4.09	1.88	-0.394	3.57	2.63	2.37	-0.609	0.476	2.33	4.99
4.04	-0.473	-2.92	-0.11	-1.26	-1.1	0.592	0.893	-0.0591	-0.0388	2.63	-0.6	1.15	-0.861	4.47	2.52	1.48	0.167	-0.788	1.94	4.49
4.13	-0.0521	-1.8	0.206	-0.794	-0.4	1.38	-0.146	-1.14	-0.605	2.69	-0.666	2.18	-0.709	3.25	3.63	1.98	0.491	-1.93	1.32	3.75
3.51	-0.277	-1.71	-0.00157	-1.5	0.386	0.771	0.755	-0.925	1.38	2.36	0.0248	1.74	-0.947	3.98	2.11	2.83	0.131	-1.36	1.85	3.52
2.69	-0.652	-1.28	0.409	-2.34	0.586	0.924	-0.755	-1.52	1.63	2.21	-1.09	1.54	-0.429	3.13	1.38	2.25	-0.668	-0.974	-0.0763	3.82
4.9	-1.52	-0.14	0.428	-1.16	-0.62	1.86	1.2	-1.01	-0.0242	2.32	-1.46	0.594	-1.01	2.27	2.56	1.77	-0.0866	-2.09	-0.261	3.36
5.47	-0.607	-1.59	0.853	-1.43	0.955	2.14	0.318	0.291	0.00971	2.23	-2.4	2.21	-1.61	3.15	2.59	1.92	0.15	-0.464	1.24	3.61
3.58	-0.198	0.0869	0.955	-0.683	-0.505	2.27	0.205	-0.161	1.44	2.18	-1.28	0.102	-2.26	3.71	2.56	2.8	-0.716	0.247	-0.56	3.8
3.36	-1.81	-1.8	1.05	-0.574	-0.295	2.25	-0.0227	-0.265	0.788	2.3	-1.04	-0.159	-1.82	3.79	1.46	3.17	-1.07	-0.287	-0.737	4.74
3.9	-1.27	-0.834	1.28	-0.501	-0.294	2.17	0.486	-1.41	1.88	2.36	-1.11	1.15	-1.72	3.86	2.81	2.99	-1.62	-1.21	0.25	5.33
4.47	-0.823	-1.51	1.78	-0.681	0.103	2.79	1.26	-1.7	0.366	2.05	-1.17	1.24	-0.934	2.91	1.58	1.92	-0.675	-0.0586	0.448	5.79
2.02	-1.22	0.209	1.67	-0.991	-0.759	2.56	1.41	-1.42	1.22	2	-2.24	1.73	-0.604	4.69	3.17	2.01	-0.785	-0.706	1.01	5.58
2.96	-1.07	-2.9	1.54	-1.04	-1.63	3.14	1.4	-0.726	-0.653	1.74	-2.11	3.44	0.281	3.53	1.84	2.17	-1.57	-1.75	0.688	5.25
6.19	-0.419	-1.08	1.51	-1.87	-0.75	3.73	-0.265	-0.667	-0.0783	2.17	-2.46	2.44	-0.0822	2.95	1.6	1.32	-0.953	-1.8	-0.254	4.87
3.46	-0.79	-1.74	1.11	-1.58	-0.144	3.53	-0.352	-0.228	0.775	2.48	-0.936	1.63	0.0511	2.07	2.65	2.17	-0.674	-0.621	-1.8	4.58
3.2	0.33	-1.28	0.435	0.624	-2.2	3.34	1.08	0.044	0.614	2.41	-2.79	1.3	-0.367	2.78	2.94	1.91	0.000247	0.078	-0.243	3.96
3.64	-0.907	-3.03	0.00152	-0.627	-0.478	2.95	-0.0802	0.407	0.131	2.47	-0.965	2.92	-0.74	3.33	2.62	2.36	-0.536	0.184	-1.63	3.51
3.7	0.188	-2.39	-0.269	-1.9	0.169	2.94	1.59	-0.143	0.0619	3.18	-0.968	2.04	-0.646	3.92	1.33	1.78	0.69	0.729	-0.55	3.14
5.31	-1.45	-1.38	-0.479	0.0192	-1.17	0.752	1.55	0.124	1.1	2.57	-0.747	2.51	-1.21	2.23	2.66	2.02	-0.339	-0.932	-1.89	2.35
4.63	-0.894	-1.5	0.675	-0.921	-1.04	0.94	1.25	-0.158	1.32	2.45	0.517	1.69	-1.48	3.87	3.38	1.95	-0.784	-0.187	-0.729	2.86
4	-0.46	-3.38	0.606	1.12	-0.335	-0.174	0.232	-1.04	2.21	2.9	-1.35	1.7	-1.84	3.82	4.1	2.22	-0.774	-0.896	-1.63	2.91
4.66	-0.636	-2.2	0.67	-0.247	-0.524	0.11	2.24	-0.0455	0.688	2.35	-0.228	0.21	-2.24	3.73	4.22	1.79	-0.39	-0.509	-1.66	2.27
2.94	-2.18	-1.48	0.722	-0.392	-1.23	0.672	-0.353	-0.271	-0.255	2.38	1.42	1.9	-2.23	4.18	2.47	2.92	0.578	-0.633	-1.89	3.1
5.06	-1.81	-0.868	0.597	-0.853	1.01	0.536	0.695	-0.127	-0.881	2.58	0.315	1.91	-2.22	3.59	3.56	1.53	-0.161	-1.59	-1.79	3.33
2.56	-1.85	-1.54	0.127	-1.73	1.56	-0.0892	0.395	-1.09	-0.493	3.01	-0.0536	2.42	-2.21	2.43	3.96	2.52	0.15	-2.49	-0.973	4.06
4.92	-1.09	-0.93	0.404	-0.296	0.641	1.09	1.49	-1.71	1.76	2.58	2.65	3.67	-2.07	1.47	4.54	2.46	0.0454	-1.16	0.162	3.51
3.31	-1.43	-0.655	-0.0591	-0.876	1.08	0.519	2.25	-1.42	-0.814	2.56	2.92	2.1	-2.58	2.43	3.8	2.66	-0.525	-0.91	-0.35	3.97
3.78	-1.78	-1.28	-0.317	0.0121	-1.64	1.67	-0.104	-1.6	1.52	2.81	3.33	2.11	-2.59	0.556	3.16	3.44	-0.822	0.607	0.0479	3.12
4.04	-2.25	-1.31	-0.079	-0.562	0.567	1.68	-0.41	-1.09	1.1	2.73	-0.242	2.39	-2.73	-0.763	3.62	3.64	-1.72	-1.1	0.453	3.33
3.65	-1.49	-2.42	-0.173	-0.332	-0.307	0.882	0.263	-1.64	0.778	2.87	2.45	3.1	-2.76	-2.5	4.78	2.26	-2.25	-0.167	-0.107	3.05
3.09	-1.17	-0.0599	-0.259	-1.29	-0.93	-0.779	0.0182	-0.212	1.19	2.47	0.604	0.616	-2.44	-0.887	2.83	2.84	-2.67	0.51	0.292	3.23
3.49	-0.215	-1.67	-0.0688	-0.443	-0.168	-0.797	0.0545	-1.14	1.09	2.62	-0.517	1.19	-2.16	-1.62	4.09	2.5	-2.42	-0.776	0.153	4.03
3.05	-0.182	-1.62	-0.469	-1.6	0.0231	-0.692	2.11	-1.62	1.47	3.06	0.903	-1.08	-2.44	-1.39	1.76	2.65	-2.45	0.52	1.26	3.59
2.17	-0.822	-1.53	-0.51	-0.646	-1.45	-1.75	1.08	-0.181	1.07	2.96	1.54	-0.851	-2.59	-0.23	2.35	2.58	-2.62	-0.274	1.36	3.33
1.71	-1.65	-1.82	-0.719	-0.585	-1.23	-2.19	0.487	0.387	0.396	3.02	1.28	-0.85	-2.36	-1.35	2.81	2.73	-2.75	-0.69	0.911	3.32
1	-0.847	-2.39	-1.19	0.303	-1.91	-0.919	-0.572	-0.257	0.707	3.17	0.518	0.471	-3.28	-1.55	4.14	2.78	-2.16	-0.874	1.56	3.27
3.33	-0.591	-2.24	-1.53	-0.224	-0.742	-0.228	2	-0.754	0.356	3.3	-0.844	-0.442	-2.99	-1.45	2.91	2.09	-2.86	-0.584	0.623	4.19
4.82	-1.1	-2.39	-1.31	-0.925	-2.3	-0.616	0.547	-0.4	1.39	3.11	-0.16	-0.0681	-2.28	-3.49	3.24	2.81	-2.28	-0.439	0.595	3.33
1.79	-1.79	-1.28	-1.17	-1.59	-0.509	0.419	0.483	-2.69	1.26	3.48	-1.47	1.05	-2.86	-2.32	2.58	2.98	-3.46	-1.2	-0.669	3.52
3.37	-1.52	-2.2	-1.4	-0.0786	-1.45	0.463	0.668	-0.173	0.356	3.28	-0.573	0.272	-3.15	-1.64	3.63	4.2	-2.88	-0.0979	-0.646	3.28
3.51	-1.07	-1.29	-1.19	-0.252	-0.554	1.32	0.822	0.403	0.884	2.89	1.27	1.63	-3.16	-0.647	4.09	2.97	-2.35	-1.52	-1.89	2.69
3.24	-0.0284	-3.71	-1.43	0.575	-0.702	1.24	-0.212	0.367	-0.294	2.73	1.48	2.41	-2.96	-0.326	4.56	2.62	-1.47	-2.02	0.372	3.2
3.75	-1.21	-3.83	-0.883	0.114	-0.679	0.544	0.158	0.334	0.678	2.27	1.06	1.06	-2.25	-1.22	4.43	1.83	-2.24	-2.09	-1.71	3.47
3.22	-0.388	-3.98	-0.858	1.08	-0.799	1.19	0.985	-1.17	0.751	1.49	-0.2	0.621	-2.54	-0.0256	3.71	2.43	-2.47	-0.879	-0.65	3.08
3.67	-0.929	-3.31	-0.859	1.17	0.862	1.27	2.02	-0.255	1.16	1.8	-0.205	1.3	-2.6	-2.12	2.85	2.44	-1.71	-1.9	-0.404	3.19
2.82	-0.906	-3.07	-0.692	1.24	-1.2	0.173	1.73	-0.877	2.13	2.07	-0.121	1.87	-2.47	-2.37	3.83	2.22	-1.21	-0.484	-1.07	3.21
1.91	-1.95	-2.27	-0.58	0.242	-1.05	-0.425	1.32	-1.85	-0.336	2.49	-0.0309	0.0598	-2.75	-2.03	3.84	1.92	-1.06	-1.94	-1.59	3.75
2.18	-1.05	-4.24	-0.676	0.908	-2.24	-0.365	0.000489	-2.24	0.384	2.52	0.905	0.971	-2.53	-1.44	3.17	2.5	-0.59	-0.134	-0.608	3.48
2.69	-1.58	-4.41	-0.381	1.49	-3.06	-0.153	-0.485	-1.58	-0.0819	3.16	-0.557	2.09	-2.16	-0.92	3.52	2.19	-0.214	-0.447	0.277	3.32
3.84	-0.912	-5.01	-0.641	1.1	-1.56	0.306	-1.49	-2.14	-0.189	3.25	0.338	0.565	-2.4	1.33	3.74	1.86	-0.937	-1.92	-1.19	4.08
2.85	-1.39	-3.14	-0.308	-0.119	-0.577	-0.406	-0.134	-3	0.432	2.39	0.486	0.709	-2.4	-0.86	2.75	1.7	-1.06	-1.22	-1.58	3.76
2.99	-1.89	-2.34	-0.247	0.595	-0.00805	0.289	0.72	-2.8	0.807	2.89	-0.504	0.24	-3.96	0.299	2.19	2.26	-1.48	-1.27	-1.1	4.49
3.25	-0.672	-0.64	-0.265	1.08	-0.878	-0.0372	0.397	-3.17	2.2	2.53	0.345	0.577	-4.2	0.461	3.79	2.24	-1.12	-2.13	-0.284	4.46
3.75	-1.37	-0.662	-0.145	-0.187	-1.2	-0.899	0.75	-2.86	2.91	3.01	2.61	1.87	-4.21	-1.54	4.1	2.69	-0.875	-1.59	-0.242	4.72
3.15	-0.0797	-1.24	0.294	0.833	-0.973	-0.404	-0.247	-2.62	0.206	3.17	0.45	3.35	-3.99	-1.89	3.65	2.93	-0.47	-2.68	-1.86	4.87
3.31	-1.01	-2.27	0.388	-0.371	2.03	-0.128	-0.534	-2.36	1.01	2.58	-1.44	1.32	-3.89	-1.56	4.12	2.35	-0.81	0.411	-0.803	3.8
4.76	-0.423	-0.441	-0.38	-1.07	-0.656	0.547	0.217	-2.1	1.89	2.66	0.428	0.139	-2.72	0.0545	3.36	2.2	-0.608	-1.46	-2.03	4.03
3.6	-0.887	-1.64	0.229	-0.319	0.888	0.606	0.13	-1.83	2.3	3.17	-0.473	1.26	-2.9	-0.169	1.99	1.91	-0.175	-0.89	-1.67	4.67
4.9	-0.575	-3.55	0.106	0.721	-0.58	-0.116	0.266	-1.7	1.78	3.15	0.393	0.995	-2.93	-1.47	2.23	2.23	0.00648	-1.02	-0.986	4.29
3.93	-0.387	-2.41	0.0288	0.989	-1.08	0.233	-1.81	-2.38	2.27	3.34	-0.121	-0.199	-3.02	-1.75	2.68	1.35	0.201	-0.895	-2.41	3.7
3.9	-0.782	-1.01	-0.302	2.23	0.08	0.528	-0.449	-3.53	0.397	3.01	0.821	0.941	-2.86	-1.53	4	1.4	0.059	0.008	-1.55	3.82
3.74	-0.0609	-2.17	-0.112	1.93	-0.337	0.453	-0.793	-2.88	-0.178	2.82	-0.058	2.05	-2.78	-1.14	4.07	1.02	-0.777	0.49	-0.616	3.71
5.08	-0.99	-2.43	-0.0441	0.898	-0.436	-0.036	0.549	-2.92	1.46	4.04	1.48	1.79	-2.83	-0.971	2.59	1.05	-0.913	-1.13	-1.23	4.28
4.11	-0.592	-1.58	0.051	1.07	-0.0261	-0.118	-0.414	-2.39	-0.0973	3.89	0.628	2.43	-3.29	-0.726	5.16	0.766	-1.3	-0.83	-1.81	3.9
4.34	-0.63	-1.12	-0.237	-0.155	-0.774	-0.983	0.219	-1.32	2.85	3.05	1.75	1.87	-2.05	0.381	4.83	2.13	-1.72	-1.33	-0.864	4.52
3.84	-1.17	-2.69	-0.919	1.28	-0.208	-1.49	-0.393	-0.959	0.93	2.43	0.302	2.16	-2.79	-0.563	4.26	2.61	-2.06	-1.08	-1.81	4.98
3.81	-1.29	-1.41	-0.52	2.13	-1.03	-1.46	-1.02	-2.98	1.59	2.17	2.09	1.7	-1.96	-1.35	3.53	2.8	-1.74	-0.739	-2.4	4.98
5.38	-0.428	-0.58	0.0318	0.935	-1.82	-0.523	-1.04	-2.32	1.79	2.32	1.84	0.53	-1.06	-1.36	3.83	3.04	-1.92	-0.0392	-0.519	4.88
5.01	-1.18	-1.25	0.529	0.723	0.29	-0.929	0.437	-1.18	2.96	2.39	0.88	0.393	-2.74	0.0857	5.41	2.52	-2.04	-0.771	-2.42	4.51
5.35	-0.833	-2.17	0.409	-0.537	-0.215	-1.08	-0.388	0.824	1.52	2.61	2.15	0.425	-2.63	0.338	4.36	1.79	-2.29	-1.34	-1.37	3.95
5.86	-0.701	-0.745	0.494	0.597	1.18	-0.572	0.0822	0.875	1.85	1.99	0.538	0.514	-3.27	0.0526	3.96	0.69	-1.89	0.0434	-0.106	4.4
5.05	0.302	-0.497	0.528	0.849	1.07	0.723	-0.958	1.32	0.118	1.6	1.44	1.01	-2.97	-0.328	4.14	0.871	-2.4	-1.46	-1.54	4.58
4.58	0.972	-1.28	0.914	1.09	1.01	0.101	0.0888	0.858	0.98	1.07	-1.19	0.282	-1.32	0.423	3.66	1.5	-2.17	-1.14	-1.66	4.71
4.26	1.71	-1.25	1.13	1.01	0.59	-0.665	-0.226	-0.742	2.08	0.389	-0.354	0.372	-2.27	-0.215	3.85	1.35	-2.45	-1.05	-0.342	4.87
3.4	1.27	-0.739	1.03	0.439	-0.724	-2.16	0.615	-1.81	1.11	0.759	0.607	-1.83	-3.12	1.76	4.48	1.56	-2.18	-0.985	-0.824	4.51
4.21	0.63	-2.02	1.13	1.08	-0.766	-2.48	-0.0681	-1.95	-0.494	0.754	1.44	-0.918	-3.19	0.149	4.18	1.57	-2.84	-1.26	-0.193	3.92
4.18	0.0221	-1.18	0.601	-0.884	-0.967	-1.45	-2.78	-3.06	0.567	0.852	-0.871	0.357	-3.1	1.03	4.45	1.41	-2.62	-2.1	-2.12	4.31
5.33	-0.394	0.0876	0.997	1	-0.563	-1.55	-1.31	-3.2	0.963	0.687	0.0067	0.295	-3.18	1.29	3.44	1.69	-3.25	-1.29	0.199	3.85
3.89	-1.21	-2.78	1.18	-0.921	0.738	-2.14	-0.063	-3.53	0.95	1.06	0.443	1.89	-3.05	0.653	5.11	1.5	-3.06	-1.45	0.051	4.18
4.74	-0.152	-0.746	1.03	-0.745	-0.359	-1.57	0.228	-2.6	1.01	1.36	-1.34	1.47	-2.91	0.351	4.16	1.52	-2.38	-2.73	-0.937	3.96
4.29	-0.308	0.448	1.15	-0.669	0.2	-2.03	-1.01	-1.77	0.991	1.89	0.374	0.803	-2.36	-0.087	3.89	1.6	-2.39	-2.59	-0.915	4.14
5.15	0.333	-0.433	0.999	-1.17	-0.778	-2.5	-0.827	-1.14	1.13	1.7	-1.11	1.08	-2.72	0.0223	4.36	2.13	-2.42	-1.11	-0.459	4.22
4.24	0.674	-0.32	0.699	-1.7	-0.214	-2.3	-1.58	-1.22	0.714	1.8	0.479	0.305	-2.97	-0.238	4.44	1.01	-2.01	-0.489	-1.82	3.55
4.63	-0.467	1.02	1.13	-0.872	-0.777	-3.04	-0.651	-0.74	-0.595	2.66	-0.179	0.459	-2.86	-0.366	5.4	0.695	-1.07	-2.36	-2.05	3.32
4.59	0.505	0.392	1.21	0.334	-1.3	-1.55	-0.371	0.667	-0.621	2.2	-0.171	1.49	-2.82	0.612	4.7	1.24	-0.933	-0.381	-1.36	3.44
3.69	1.07	-0.143	1.26	0.418	-0.318	-1.67	-0.326	0.469	0.0707	2.48	-0.993	0.511	-2.69	-0.237	5.16	1.53	-0.975	-1.79	-1.38	3.48
2.75	-0.155	-0.139	1.07	-1.1	0.724	-0.761	-1.48	0.358	1.8	2.49	0.254	0.216	-2.33	-1.3	4.25	1.96	-1.04	-1.71	-0.92	3.23
0.746	0.92	0.808	0.735	-0.2	1.1	-1.13	-2.09	-1.64	1.61	2.58	0.332	-0.369	-2.47	0.162	5.41	2.02	-0.9	-0.752	-0.343	3.24
2.08	0.815	0.931	0.0813	-0.285	-1.16	-1.09	-0.496	-1.16	2.91	2.5	-1.5	0.795	-2.3	0.122	4.55	2.22	-0.592	-1.04	-0.307	2.75
3.75	0.597	0.217	0.193	-0.828	0.749	-0.392	-0.805	-0.166	-0.102	2.75	-1.08	0.505	-2.19	-0.381	4.71	1.72	-1.01	0.0854	-0.361	2.72
3.58	0.658	1.61	0.431	-0.936	-1.5	-0.325	-0.33	0.147	1.25	2.39	-1.17	2.7	-2.3	-0.597	3.88	1.45	-0.00862	-0.401	-0.647	3.3
2.47	0.0805	0.449	0.37	-1.39	-1.12	-1.14	-0.0811	-1.31	-0.74	2.87	-0.4	1.15	-1.95	-0.383	3.44	1.49	-0.652	-1.81	-1.35	2.98
3.1	-0.847	-0.0274	0.555	-0.121	-0.397	-0.946	-1.01	-2.34	0.988	3.22	-0.0372	3.1	-2.24	-1.27	4.07	1.44	-1.15	-0.814	-1.9	3.08
2.59	-0.428	3.01	0.538	-1.32	-0.127	-0.373	-0.592	-0.69	1.28	3.34	-0.678	2.85	-2.71	-0.812	4.71	1.88	-1.35	-0.0353	-0.556	3.11
2.8	-0.887	0.0115	0.0704	-1.69	-1.29	-0.852	-0.416	0.66	1.52	3.46	-1.29	1.93	-2.69	-0.0335	3.42	2.08	-1.06	-1.08	-2.23	2.77
2.42	-1.04	-0.271	0.256	-0.423	-0.92	-0.799	-0.887	0.112	0.982	3.19	0.652	0.799	-1.7	-0.0936	4.8	1.68	-0.417	-2.81	-2.19	3.28
2.38	0.405	-0.522	0.0323	-0.26	-1.1	-1.68	-2.33	0.932	0.655	3.85	0.51	2.2	-1.08	-0.633	4.08	1.26	-0.59	-2.07	-1.04	2.76
2.07	0.311	1.48	-0.582	0.154	-1.59	-1.06	-0.467	0.0825	2.15	3.24	0.817	1.39	-2.04	0.0496	2.3	1.49	-0.545	-1.1	-0.709	3.74
2.06	0.333	0.445	-0.767	-0.262	-1.2	-0.913	-0.127	0.364	1.83	2.98	0.895	0.824	-1.88	-0.347	2.72	0.883	-0.263	-0.354	-1.85	3.42
2.13	0.652	0.575	-0.489	0.0358	-0.881	-1.1	-0.41	1.3	0.978	2.82	0.161	0.783	-1.98	-1.31	1.59	1.16	-0.287	-1.87	-0.988	3.66
4.14	0.925	0.456	-0.418	-0.00709	-1.4	-1.65	-0.972	0.924	2.7	2.8	1.09	-0.212	-1.59	-0.136	1.81	1.29	-1	-2.23	-0.783	2.94
4.68	0.64	1.58	-0.137	-0.397	1.27	-1.66	-0.758	0.324	1.01	2.83	1.9	0.845	-1.14	-0.705	1.62	0.793	-0.971	-2.27	-0.437	2.74
4.58	0.657	-0.554	0.156	-0.985	1.68	-2.15	-1.47	-0.707	1.07	2.95	1.62	-0.241	-1.02	-0.28	1.26	1.28	-1.58	-1.46	-0.742	2.91
6.69	-0.459	1.74	0.2	-0.607	-0.336	-1.24	0.194	-0.314	1.56	3	1.07	0.46	-0.877	-0.456	3.76	0.784	-1.04	-1.23	-1.7	2.69
5.42	-0.477	-0.486	0.0703	-0.472	-0.764	-2.02	-1.52	-0.742	0.262	3.68	1.61	0.165	-0.917	-0.6	5.28	1.29	-1.1	-1.16	-1.43	3.56
5.84	-0.674	0.0813	0.508	-1.29	-0.978	-1.64	-0.628	-0.0235	1.04	5	0.672	3.09	-0.579	-0.644	2.95	2.19	-0.971	-2.6	-1.61	2.77
5.36	-1.22	1.27	0.671	-1.03	-0.347	-2.38	-0.707	-0.356	1.39	5.73	1.6	1.74	-1.1	-1.81	4.57	1.75	-1.6	-2.35	-2.47	2.54
6.99	-1.46	0.946	0.777	-0.856	1.01	-3.3	-2.29	0.359	0.588	6.34	0.121	3.33	-0.957	-1.05	3.09	2.11	-0.574	-2.41	-2.83	3.53
8.19	-1.95	0.882	0.889	-1.28	1.96	-3.28	-2.43	-0.396	-0.562	6.52	0.00996	1.05	-0.459	-0.333	4.03	2.43	-0.178	-2.13	-2.27	4.01
5.36	-2.71	0.475	0.614	-1.54	1.62	-2.89	-2.96	0.128	1.1	6.18	0.484	0.737	-1.25	-3.41	2.6	2.3	-0.294	-2.51	-1.78	3.26
5.5	-1.74	1.53	0.499	-1.26	1.14	-2.34	-1.6	0.073	-0.423	6.16	2.01	1.83	-0.024	-1.49	4.72	2.14	0.217	-2.39	-2.35	2.92
4.89	-2.8	0.0906	0.36	-0.965	3.26	-2.33	-1.82	-0.107	1.75	6.74	-0.359	1.65	-0.633	-3.32	4.66	1.79	0.826	-1.41	-2.54	3.61
4.82	-3.01	1.09	0.549	-2.25	1.45	-2.11	-2.94	0.0285	1.6	6.46	-0.0223	1.96	-0.402	-1.44	3.37	0.828	2.21	-2.18	-3.47	3.19
6.01	-2.79	0.723	0.459	-2.48	2.09	-1.82	-1.78	-0.314	0.438	6.7	0.0697	0.253	-0.416	-1.72	3.43	-0.254	0.592	-1.75	-2.88	2.79
4.91	-0.775	1.68	0.31	-0.0226	1.32	-1.83	-1.95	-0.172	-0.112	6.33	-1.77	0.00141	0.158	-1.66	3.07	0.427	0.116	-1.25	-2.68	3.14
3.96	-2.01	-0.554	-0.0243	-0.0112	1.27	-1.88	-2.2	-0.0266	1.14	6.67	-0.374	0.522	-0.748	-0.851	3.47	0.246	0.876	-1.03	-1.44	2.59
3.76	-2.12	-1.31	0.257	-2.27	2.13	-1.73	-2.04	-0.82	0.882	6.62	-1.15	1.68	-0.417	0.106	3.59	-0.0594	1.19	-1.47	-2.53	2.88
4.47	-1.34	-0.632	0.647	-2.25	1.02	-1.94	-1.41	-0.484	1.52	7.36	1.44	1.74	-0.794	-0.567	4.12	0.836	-0.0375	-1.4	-2.47	2.71
4.97	-2.29	-0.301	0.324	-0.317	1.56	-1.82	-0.148	-0.257	1.63	6.86	-0.674	0.0978	-0.975	-0.736	3.84	0.736	-0.0103	-2.19	-2.17	2.22
4.39	-2.09	-1.48	-0.311	-0.906	2.26	-0.971	-0.61	-0.784	-0.0247	6.41	1.45	0.493	-1.37	-0.106	4.36	0.297	0.252	-1.41	-1.65	2.01
4.82	-1.05	-1.04	0.102	-0.854	0.915	-1.9	-0.356	-0.106	1.48	6.66	0.867	0.539	-1.22	-1.03	2.05	0.798	0.155	-1.77	-1.97	1.13
3.91	-1.66	-0.363	0.0867	-0.302	2.46	-1.76	-0.139	-0.317	1.8	6.19	-0.0595	1.19	-1.34	0.458	3.65	1.27	0.0146	-0.951	-1.09	0.852
3.68	-2.79	-1.16	-0.13	-0.118	2.16	-2.86	-0.864	0.787	1.33	4.91	-0.244	-0.167	-0.599	0.755	3.89	0.842	0.369	-0.557	-3.07	0.383
4.03	-1.73	-1.72	-0.00352	-2.47	1.55	-2.45	-1.2	1.34	0.148	5.03	0.559	-0.921	-1.37	-0.482	2.45	1.35	0.0437	-1.67	-3.06	0.586
3.18	-1.94	-1.31	-0.0338	-0.503	0.178	-1.83	-0.409	1.1	2.2	5.28	0.675	-0.114	-2.19	-0.852	2.79	0.938	-0.0759	-1.71	-1.99	1.76
4.49	-1.93	-2.25	-0.257	-0.755	0.359	-2.43	-0.89	0.386	1.4	5.69	-0.658	-1.51	-2.15	-0.375	3.48	0.807	0.811	-3.05	-2.19	2.44
4.05	-1.75	-0.896	-0.0449	-0.71	-0.00966	-2.1	-0.695	1.31	1.53	5.99	0.645	1.9	-1.74	0.0327	3.38	0.538	0.0569	-1.7	-2.91	2.15
2.74	-1.65	-2.16	0.264	-1.56	-0.535	-2.71	-0.337	1.19	1.39	6.43	0.766	2.68	-1.19	-1.4	3.86	0.534	-0.465	-1.95	-2.59	3.61
2.33	-0.693	-1.07	0.398	-1.4	-1.01	-2.49	-0.777	-0.899	0.0527	5.94	-1.64	1.88	-0.934	-1.72	3.14	0.992	-0.789	-2.57	-1.74	3.06
3.05	0.433	0.294	0.633	-1.7	0.382	-2.21	-1.15	-0.469	2.03	5.8	-0.787	1.68	-0.0583	-1.58	2.85	1.09	-0.524	-0.539	-1.06	2.75
2.6	-0.541	-0.931	0.883	-1.12	1.9	-2.2	0.315	0.0145	2.45	5.73	-0.32	1.09	-0.931	-1.25	2.33	0.765	0.417	-1.41	-1.74	2.57
1.78	-1.42	0.0505	0.607	-0.768	0.185	-3.15	-0.297	0.218	1.89	5.45	0.848	1.32	-0.22	-2.2	2.62	0.431	-0.115	-1.59	-0.914	2.78
1.52	-0.888	0.855	0.946	-0.878	1.3	-2.72	0.543	0.828	3.42	5.3	0.00137	2.36	-1.56	-1.25	2.38	0.0257	-0.272	-2.22	-1.14	3.5
2.78	-0.702	-0.773	1	-1.6	1.4	-2.61	0.542	1.08	1.31	5.12	-0.719	-0.418	-1.49	-1.51	3.16	0.259	-1.7	-0.961	-1.35	3.22
3.68	0.39	-1.43	0.949	-0.752	0.00183	-2.86	1.06	0.736	1.63	4.42	-1.42	0.0955	-1.51	-0.882	2.57	0.508	-2.2	-1.6	-0.844	0.542
2.98	1.3	-0.682	0.827	0.963	0.695	-5.02	0.66	1.96	1.36	4.74	0.497	1.37	-0.744	-1.28	3.06	0.784	-2.55	-1.8	-1.11	1.41
2.9	1.2	-0.518	0.476	-0.247	-0.978	-4.34	0.522	2.65	2.05	3.66	0.533	0.301	-0.407	-0.943	2.58	0.358	-1.66	-2.57	-2.58	0.599
4.15	1.14	-0.678	0.211	-1.06	-1.71	-3.66	-0.524	2.11	1.97	4.15	-0.393	2.36	-0.625	-1.06	2.67	0.126	-1.52	-1.37	-3.53	0.515
1.99	-0.0956	-0.559	0.147	-0.599	-0.833	-4.41	0.685	2.22	2.4	3.55	-0.631	0.48	-1.73	-2.43	3.25	0.544	-0.264	-3.26	-1.92	0.572
3.58	-0.277	0.587	-0.0195	-0.264	-0.565	-3.74	-0.0432	1.33	1.14	4.06	-0.381	0.63	-1.42	-2.15	3.34	0.558	1.49	-3.25	-1.86	0.834
3.55	-0.626	1.88	-0.373	-1.57	-1.04	-2.67	0.0338	0.716	0.254	3.31	-0.701	0.309	-1.1	-1.25	3.85	0.577	0.735	-3.73	0.336	0.322
3.79	-0.48	0.0687	-0.5	-2.04	-0.921	-3.13	0.82	0.281	0.406	2.75	-0.00328	-0.436	-1.14	-0.498	3.88	1.18	0.36	-2.75	-2.17	0.659
4.43	-1.31	-0.521	-0.115	-0.631	-0.211	-3.11	-1.18	-1.13	1.01	2.44	-0.827	1.63	-2.03	-2.05	3	1.92	0.278	-1.9	-2.75	1.41
6.71	-1.76	0.278	0.378	-0.932	0.321	-3.58	-0.485	-1.11	3.99	1.92	-1.34	0.643	-1.73	-0.448	4.48	1.15	-0.378	-3.86	-1.21	2.19
4.75	-2.11	1.79	0.0855	-0.254	-0.169	-4.54	0.186	-2.1	1.09	1.86	-0.988	-0.262	-1.2	-0.176	3.89	2.01	-0.969	-2.61	-2.28	1.93
4.74	-1.33	1.24	0.197	0.478	2.01	-4.45	-0.961	-0.823	1.08	2.09	0.817	1.04	-0.559	0.793	4.42	1.01	-0.973	-2.46	-0.79	2.21
4.53	-0.316	0.849	0.104	-0.097	0.899	-4.31	0.2	-0.809	0.728	1.6	-0.297	3.24	-0.0963	0.59	2.9	1.27	-1.45	-2.46	-1.96	2.21
6.14	0.527	0.376	0.445	-0.876	0.699	-3.22	0.702	0.134	1.54	1.11	-0.871	2.13	-0.664	-1.03	2.7	1.08	-2.47	-2.92	-2.65	2.34
4.76	0.0563	0.074	0.55	-2.44	2.18	-3.19	-1.38	-0.219	2.06	1.32	-0.796	1.09	-0.469	-2.57	2.97	1.15	-1.99	-1.36	-1.73	1.89
5.33	0.808	0.254	0.273	0.0316	1.19	-3.31	-0.285	0.518	1.21	1.15	0.296	0.403	-0.831	-1.13	3.18	0.277	-1.63	-1.63	-2.17	2.57
1.07	0.57	-0.756	-0.00836	-0.0361	2.2	-3.22	0.618	0.606	0.124	1.32	-0.326	0.629	-0.296	-0.898	1.95	0.756	-1.64	-1.47	-1.5	2.42
1.09	0.717	-0.209	0.648	0.0122	0.9	-1.93	-0.93	-0.17	0.0328	1.39	-0.291	-0.131	0.833	0.257	1.84	0.975	-1.9	-0.189	-2.16	2.41
0.81	-0.882	1.11	0.322	0.256	1.05	-2.74	-0.404	0.326	-0.948	1.69	-0.0876	-1.01	-0.304	-0.34	1.52	0.394	-2.13	-1.31	-2.39	3.04
0.787	-1.3	-0.6	0.0881	0.99	0.0312	-2.44	-1.32	0.455	-0.28	1.62	0.536	-0.0841	-0.462	-0.383	1.36	0.0157	-0.828	-1.85	-2.14	2.71
2.14	-0.0194	-0.773	0.361	1.09	0.545	-2.29	-0.131	1.28	-0.512	1.92	0.863	0.924	-0.226	-0.458	2.07	0.62	-1.22	-1.76	-2.37	2.63
4.1	-0.953	-0.76	0.338	-0.356	2.34	-2.17	0.753	1.24	1.39	2.34	1.32	-1.26	-0.823	0.635	2.05	0.679	-0.273	-1.68	-2.6	3.34
3.58	-2.36	0.265	0.645	-0.38	2.83	-1.96	-1.11	0.603	1.19	2.56	1.48	-0.386	-1.37	-1.61	0.979	0.821	0.606	-1.22	-1.05	2.82
4.01	-1.62	1.06	0.563	-0.256	3.29	-3.6	-0.283	-0.17	0.363	2.98	-0.436	-1	-1.99	-2.15	1.84	1.71	0.294	-1.34	-2.45	3.14
1.65	-2.05	-0.179	0.428	-1.61	2.36	-3.6	0.947	-1.14	1.7	3.2	1.48	-1.66	-2.3	-2.66	2.97	1.74	-0.041	-2.03	-1.93	3.51
2.55	-2.12	0.0176	-0.0405	-0.413	0.815	-5.12	-1.05	-0.555	0.0306	3.86	-0.62	-1.62	-2.51	-1.1	3.32	0.72	0.516	-1.71	-1.72	3.59
0.981	-1.99	0.127	-0.203	-1.62	1.23	-3.92	-0.616	-0.16	-0.0223	3.62	-0.0192	-0.984	-3.04	-1.69	2.99	-0.599	-0.976	-1.28	-1.72	3.58
1.09	-2.39	-0.4	-0.00424	-0.379	1.09	-3.96	-0.353	-0.946	1.52	4.22	0.712	0.0758	-2.08	0.41	2.36	-0.0613	-2.54	-0.346	-0.661	3.89
1.47	-2.73	-0.755	-0.306	-1.13	0.329	-3.15	-0.0464	-1.24	0.732	4.27	1.42	0.108	-2.48	-0.483	3.7	-0.792	-2.51	-0.668	-0.889	3.48
2.72	-2.44	-1.48	-0.399	0.325	1.54	-3.24	-0.405	-0.129	1.42	4.01	0.744	-0.0854	-3.87	-0.0895	2.72	0.656	-2.57	-1.59	-1.05	3.89
2.45	-2.98	-0.256	-0.35	-1.01	0.597	-3.02	-1.32	-0.701	1.47	3.96	0.0168	0.422	-2.85	-1.52	2.57	0.691	-2.63	-0.81	-1.45	3.61
3.19	-3.36	-1.46	-0.185	-1.63	1.13	-2.53	0.585	-1.55	0.885	3.99	0.671	-0.702	-1.37	0.479	3.1	0.298	-2.46	-0.753	0.45	3.53
3.47	-3.54	-2.03	-0.125	-1.55	-0.036	-1.92	-0.0345	-1.39	1.68	3.21	0.545	-1.05	-1.54	-0.726	3.58	-0.000126	-2.24	-0.457	2.69	3.46
2.65	-2.84	-2.82	-0.495	-1.08	-1.75	-3.01	-0.77	-1.31	0.444	3.07	-1.68	-1.28	-1.78	1.26	1.7	0.732	-1.89	-0.656	2.19	4.23
1.68	-1.47	-0.88	-0.165	0.0976	0.827	-3.86	-1.17	-1.65	0.106	2.54	-1.17	0.181	-2.23	1.22	1.98	1.28	-2.01	-0.997	1.07	3.71
1.31	-0.306	-2.2	0.736	-2.91	1.16	-3.53	-0.346	-0.365	1.14	2.26	-1.9	0.672	-2.57	1.23	1.38	1.33	-0.614	-0.702	0.88	3.51
1.81	-1.19	-1.28	1.31	-0.47	-0.0941	-2.88	-0.226	-0.911	1.22	2.52	0.172	-0.687	-2.35	1.58	1.95	1.22	-0.342	-1.53	0.472	3.16
2.52	-1.89	-0.644	1.19	-1.69	1.57	-2.49	-0.949	-1.97	0.259	2.28	0.175	-0.576	-2.36	1.76	3.08	1.02	0.463	-1.31	1.99	3.85
3.48	-1.4	-1.01	0.762	0.654	1.22	-3.13	-1.39	-1.04	1.33	2.28	-0.0913	0.476	-2.24	0.237	3.63	1.15	0.479	-0.78	2.05	3.06
1.96	-1.84	-1.29	-0.0546	-1.09	1.87	-2.83	1.37	-1.34	0.372	1.65	-0.567	-0.441	-2.59	0.154	2.95	1.37	0.82	0.101	0.494	2.5
3.47	-2.45	-2.27	-0.0927	-0.696	0.0624	-2.63	1.41	-2.6	0.562	2.4	0.0832	0.0954	-2.36	0.546	2.82	0.0468	0.433	-1.32	-0.257	2.64
1.28	-2.85	-1.29	0.892	-1.52	0.464	-3.29	-0.132	-2.52	-0.24	2.28	-0.0803	-0.174	-2.08	1.88	3.13	0.737	0.0687	-1.99	-0.187	2.91
1.99	-3.28	-1.42	0.298	-2.19	0.876	-3.56	0.518	-2.02	0.346	1.65	-1.39	0.0801	-2.58	0.794	3.54	0.38	-0.242	-2.31	0.87	3.6
1.14	-2.71	-0.251	0.234	-0.28	1.8	-3.72	-1.58	-0.52	0.137	2.73	0.571	-0.486	-2.55	0.0414	3.07	0.959	-0.625	-1.64	-0.527	3.94
2.74	-2.16	-0.555	0.312	0.767	0.0802	-2.97	0.483	-0.0977	0.403	3.18	0.712	0.496	-3.01	0.35	3.85	0.852	-0.332	-1.66	0.45	4.11
1.55	-2.22	-1.29	0.289	-1.12	1.2	-2.47	-1.53	-1.11	-0.512	3.13	-0.209	-0.133	-2.99	0.174	2.21	0.828	-0.199	-1.86	0.218	4.49
2.83	-2.21	-0.56	0.423	-1.05	-0.303	-2.61	-0.095	-2.34	-0.533	2.74	-0.226	0.591	-3.7	-0.236	2.95	1.16	-0.895	-4.55	1.1	3.94
2.46	-1.69	-0.808	0.495	-0.16	2.18	-2.41	0.384	-2.19	-0.483	2.94	-0.294	0.974	-4.1	1.47	3.46	0.637	-1.16	-2.55	-0.219	3.65
1.25	-2.22	-1.97	-0.00432	-0.605	-0.601	-1.81	0.906	-0.942	-0.462	3.5	-0.57	1.1	-3.55	2.74	3.3	1.39	-0.869	-2.08	0.611	3.63
0.79	-2.85	-1.59	0.00719	-1.97	-2.97	-2.82	0.0167	-0.786	0.743	2.75	-1.02	0.91	-4.11	2.94	3.81	1.08	-0.208	-2.62	1.62	3.44
0.894	-2.38	-1.63	-0.288	-1.57	-1.15	-2.96	-0.991	-0.61	-0.131	2.75	0.0112	0.508	-4.01	2.74	3.5	0.664	0.138	-3.08	0.126	3.5
0.488	-1.71	-1.29	-1.5	-1.64	-1.8	-2.59	-2.72	-0.18	1.05	2.78	0.87	1.68	-4.14	3.17	3.9	0.726	-0.643	-2.45	0.504	2.56
0.577	-0.8	-1.55	0.293	-0.824	-1.86	-3.05	-1.66	-0.239	0.333	2.82	-0.557	1.34	-3.99	3.6	5.1	0.586	0.318	-1.44	0.84	1.96
0.914	-2.1	-1.02	0.751	-0.86	-1.78	-3.17	-0.266	-0.535	0.154	2.86	-0.691	1.5	-3.4	1.68	3.12	1.21	-0.262	-3.17	1.86	2.56
0.147	-1.31	-1.76	0.64	-0.634	-2.82	-2.98	0.664	-0.767	-1.32	2.59	-1.5	-0.0327	-3.29	1.74	3.38	1.24	-1.23	-2.66	-0.0289	2.36
1.73	-0.772	-1.63	1.14	0.832	-1.79	-3.93	0.0382	-0.0184	-0.764	1.85	-1.54	1.03	-3.59	2.41	2.68	1.42	-1.18	-2.3	1.37	1.85
1.84	-2.54	-1.99	0.878	-0.57	-0.513	-3.57	-0.882	-0.905	-0.274	0.733	-0.336	0.601	-3.33	1.85	3.99	1.67	-1.37	-3.18	1.08	1.49
1.93	-2.07	-1.69	0.714	0.184	-2.62	-4.8	-1.32	-0.539	1.4	0.555	-2.66	-0.919	-3.71	2.08	4.15	1.34	-0.729	-4.12	0.753	1.77
0.447	-2.49	-0.254	0.746	-0.566	-2.16	-4.19	0.769	-1.13	-0.674	0.668	-2.19	-0.471	-3.63	2.64	3.49	1.43	-1.14	-3.8	1.99	2.38
0.727	-2.38	-0.459	0.316	-0.124	-1.94	-3.2	-2.49	-2.66	1.05	1.78	-1.31	0.291	-4	2.27	4.32	0.943	-0.729	-3.89	0.837	2.64
0.678	-2.15	-1.26	0.0135	-0.716	-0.752	-3.06	-1.53	-0.561	0.69	2.3	-0.122	-1.34	-3.99	3.45	4.49	0.308	-1.37	-3.8	1.18	2.37
0.832	-3.47	-2.58	-0.431	-0.878	-0.327	-3.66	-0.853	-0.652	2.28	2.79	-0.368	-0.0959	-4.21	3.65	3.84	0.504	-0.428	-4	0.983	2.92
0.648	-2.13	-2.28	-0.28	-0.17	-1.98	-3.64	-1.01	0.269	0.446	2.95	-0.24	0.231	-4.21	2.41	5.02	0.552	-0.61	-3.23	0.855	2.92
1.51	-3.23	-1.93	-1.05	-0.534	-0.524	-5.31	-1.83	0.347	0.496	2.52	-1.36	-0.196	-3.19	2.56	2.93	1.43	-0.305	-3.69	0.588	2.06
0.745	-3.23	-0.528	-0.841	-2.5	-0.779	-4.37	-1.2	0.27	0.564	3.14	-0.667	-0.195	-3.02	3.15	4.13	1.39	-1.21	-2.84	2.04	2.37
0.861	-1.97	1.23	-1.48	0.534	-0.629	-4.54	0.533	-0.25	-1.46	2.55	-0.743	-1.33	-3.32	3.35	3.9	0.793	-1.38	-2.75	1.86	1.71
2.35	-2.19	0.437	-1.18	-1.37	-0.0304	-4.27	0.205	-0.022	0.101	2.01	-0.825	-0.43	-3.64	2.88	3.97	0.715	-0.119	-1.53	1.77	1.41
0.958	-2.71	0.239	-1.47	-1.51	0.515	-3.79	-0.347	1.87	-0.196	1.43	-0.783	-0.985	-4.08	1.62	2.34	0.78	-0.11	-1.82	2.7	1.73
0.296	-2.57	-1.19	-1.04	-2.56	0.237	-3.4	0.52	1.8	1.26	2.08	0.378	0.156	-4.71	1.19	3.44	0.714	0.436	-1.28	0.469	1.49
0.429	-2.38	-0.444	-0.975	-1.58	0.337	-3.64	-0.628	1.64	0.276	2	-0.783	0.181	-4.2	1.16	2.99	1.18	0.831	-2.88	1.26	1.68
-0.0413	-2.15	-1.18	-0.914	-0.097	0.751	-4.21	-0.218	1.15	-0.0648	1.78	-0.447	0.163	-3.84	4.55	3.02	1.05	-0.153	-1.98	0.483	1.69
-0.187	-0.101	0.108	-0.261	-1.3	-1.18	-3.34	0.634	0.294	0.865	2.22	-0.302	-0.155	-3.32	3	2.57	1.3	0.224	-2.47	1.03	1.54
1.04	-0.301	-0.944	0.186	-0.513	-0.943	-3.28	0.297	0.375	1.74	2.24	-1.64	1.91	-3.91	2.15	4.37	1.44	0.554	-1.48	-0.532	1.6
0.741	-0.503	-0.243	0.713	-0.956	1.01	-4.2	-1.22	1.86	1.55	2.83	-1.2	-0.0368	-3.52	-0.217	1.76	1.17	0.546	-1.62	0.405	1.07
1.15	0.67	-0.629	0.584	-1.18	-0.28	-4.29	-0.141	0.893	1.14	2.94	-0.497	0.25	-3.71	-0.741	2.49	1.31	-0.118	-0.668	-0.384	0.529
-0.799	1.2	-1.09	0.0532	-0.319	-1.06	-3.93	-0.255	-0.0429	1.07	2.85	-1.17	1.3	-3.67	-0.0958	2.41	1.73	-0.271	-2.04	-0.862	0.0442
-0.654	1.04	-1.9	-0.305	-1.84	-1.2	-3.49	-1.39	0.0408	0.21	1.82	-1.37	1.21	-3.25	0.254	4.6	0.986	0.212	-4.01	-2.6	0.913
-1.45	0.957	-0.125	0.182	-1.63	-0.782	-3.81	-0.26	3.27	2.58	1.04	-2.15	0.278	-4.06	1.26	3.83	2.19	-0.341	-2.74	-0.932	1.3
-0.215	-0.224	-0.56	0.539	-2.07	-0.695	-3.35	-0.869	2.64	1.75	1.09	-1.6	-0.398	-3.7	1.07	3.52	1.96	0.131	-2.68	-2.65	0.313
-0.105	1.25	-0.257	-0.13	-2.18	1.99	-4.28	0.0792	2.24	0.959	1.01	-0.217	-0.272	-3.68	0.161	3.62	2.33	-0.157	-2.87	-0.0194	0.825
0.384	0.795	-0.617	-0.479	-2.79	0.549	-4.3	0.256	1.85	0.747	1.92	-0.589	-0.661	-3.87	-1.94	2.49	1.52	-0.543	-1.92	-0.815	0.981
0.412	0.956	0.285	-0.0312	-1.82	0.953	-3.61	-0.652	2.56	1.73	2	-1.25	0.578	-3.3	-0.572	3.13	1.31	-1.52	-2.87	-1.22	1.56
1.25	0.965	-0.179	-0.543	-1.4	1.19	-2.57	-1.12	2.66	-2.15	2.96	-0.119	0.023	-3.41	-0.0131	2.45	1.03	-1.62	-1.44	-3.23	2.13
-0.0802	-0.0887	1.17	-1.13	-2.39	2.39	-3.8	0.111	1	1.78	2.31	0.37	0.871	-4.33	-1.11	2.28	1.26	-0.795	-2.35	-1.84	1.88
0.553	-0.795	0.415	-0.581	-2.91	0.849	-4.29	0.341	2.4	0.587	2.12	0.0301	-0.101	-5.16	-1.08	2.17	1.58	-0.666	-3.21	-0.774	2.18
-0.679	0.0399	0.897	0.655	-3.03	1.24	-4.26	-0.287	1.51	1.38	1.61	-0.459	0.32	-5.22	-0.202	3.45	1.61	-0.657	-3.66	-1.29	2.31
0.792	0.726	0.758	0.959	-2.41	1.67	-3.73	-0.202	1.36	4.09	2.46	-0.879	0.533	-4.39	-0.607	3.88	1.24	-0.885	-3.31	-0.294	1.68
-0.48	1.34	1.37	0.828	-1.32	1.74	-4.78	0.0406	1.05	1.05	2.45	-0.859	0.746	-4.8	-0.646	4.38	1.28	-0.936	-2.93	0.888	1.04
-0.322	0.673	0.472	0.161	-0.893	2.99	-4.78	0.0453	0.918	0.871	2.01	-0.268	1.44	-4.42	-2.13	3.52	1.19	-0.963	-3.06	-0.298	1.12
-0.298	0.691	0.492	0.517	-2.29	1.68	-4.48	1.01	0.962	1.81	2.21	0.595	0.599	-4.41	-0.923	4.39	1.34	-0.173	-4.11	-0.472	1.25
0.863	-0.139	-0.666	0.412	-1.9	0.896	-4.52	1.06	1.26	1.09	2.36	1.38	-1.21	-4.16	0.587	3.62	0.943	-0.792	-3.66	-1.09	0.68
0.359	-0.154	1.15	0.348	-3.26	1.14	-5.5	0.397	0.887	2.16	1.99	0.114	-0.00845	-4.19	0.668	1.62	0.692	-0.156	-3.16	0.612	0.729
2.34	0.541	-0.878	0.209	-3.63	-0.00162	-4.43	1.97	0.408	1.44	2.19	-0.529	1.35	-3.83	0.978	3.04	0.851	-0.557	-2.41	0.24	0.538
0.587	0.568	0.877	0.388	-2.51	-0.32	-5.21	0.758	-0.0872	1.59	2.73	-0.941	1.83	-4.04	0.405	3.1	0.968	-0.144	-2.15	-0.612	0.752
-1.29	-0.324	1.97	-0.0667	-0.984	0.251	-5.02	1.65	-1.06	-0.14	2.51	-1.38	2.67	-3.91	-0.718	3.99	0.792	0.103	-2.25	-1.52	1.64
-0.276	-0.484	0.404	-0.432	-3.2	-1.34	-5.8	1.3	-0.635	3.09	2.62	1.03	0.408	-3.89	0.0737	4.3	1.14	0.0743	-2.5	0.0442	0.998
-0.997	-0.852	1.13	0.0321	-0.892	-1.35	-5.49	1.52	-0.584	2.27	2.4	0.28	2.03	-3.66	-0.522	3.49	0.223	0.581	-2.39	-0.0238	1.69
-0.143	-0.871	1.16	0.144	-2.64	-0.65	-5.54	0.42	-0.9	2.34	1.98	-0.0225	2.71	-3.91	-0.458	3.71	0.448	0.308	-2.7	-0.502	1.54
1.05	-2.02	-0.516	0.0674	-2.17	0.0425	-5.9	1.88	-0.476	2.1	2.44	-1.42	1.66	-3.36	0.203	3.6	-0.361	0.339	-3.15	-0.757	0.707
0.906	-2.03	-0.251	0.665	-2.64	-0.47	-7.28	2.36	-1.51	0.682	1.96	-1.07	2.35	-3.24	1.67	3.67	-0.515	-0.132	-1.71	0.438	0.954
1.51	-1.27	0.835	1.92	-2.49	1.03	-5.35	1.66	-1.36	0.638	1.86	-0.29	1.66	-3.32	0.267	3.94	-0.377	-0.454	-2.89	-0.156	1.76
0.94	-1.54	-0.0636	2.55	-2.14	1.79	-5.65	1.32	-1.25	1.45	2.28	-0.85	0.663	-4.01	1.69	3.25	-0.394	-0.165	-2.61	-1.5	0.863
-0.0815	-0.632	0.0544	2.86	-2.3	1.78	-6.05	0.966	-2.05	1.29	2.06	1.32	2.4	-3.96	2.23	3.47	0.178	-0.407	-3.5	0.13	1.02
1.33	-0.335	0.692	2.48	-0.759	2.54	-5.54	2.36	-0.725	0.362	1.83	0.216	0.201	-4.47	2.85	2.66	0.866	-0.833	-2.57	0.316	1.08
1.49	-1.32	1.62	1.9	-1.56	1.39	-6.22	1.83	-0.873	0.0495	1.87	1.86	1.94	-4.2	2.07	2.99	0.781	-1.16	-1.99	-0.977	1.14
2.76	-0.905	0.722	2.5	-1.96	0.716	-5.53	1.69	-1.76	-1.62	2.25	0.933	0.834	-3.46	1.97	3.43	0.31	-1.39	-1.92	-0.235	1.8
2	-0.138	0.83	2.48	-2.18	2.18	-4.55	0.729	-1.02	0.0946	2.19	-0.303	0.678	-4.26	2.3	1.85	-0.523	-1.39	-3.13	-0.202	1.79
3.83	-0.193	1.94	2.61	-2.58	1.12	-4.26	0.357	-1.09	0.677	1.65	0.185	0.989	-3.5	4.24	2.07	-0.406	-1.89	-1.56	1.02	1.14
2.44	-1.72	1.54	2.07	-1.72	1.25	-5.6	0.329	-1.04	-0.306	1.03	0.564	0.417	-3.41	2.37	3.42	-0.261	-1.75	-3.52	1.54	1.3
4.28	-0.611	2.89	1.76	-0.81	1.03	-4.78	2.11	-0.707	1.81	1.08	1.84	-1.49	-3.67	3.75	3.46	-0.412	-2.19	-3.41	0.0673	1.51
2.55	-1.45	4.05	1.39	-2.43	0.329	-4.64	1.79	-1.2	0.561	1.53	1.4	-1.41	-3.97	3.5	4.67	0.0502	-1.76	-2.85	0.4	1.52
2.04	-0.0103	2.58	1.27	-0.888	-0.375	-4.83	2.34	-1.83	1.14	2.67	2.21	-0.865	-3.68	1.25	3.84	0.385	-1.16	-1.7	-0.677	2.21
2.59	-0.326	3.24	1.79	-2.57	-1.22	-5.25	0.632	-1.13	-0.936	2.76	1.66	-0.551	-4.6	1.26	4.86	0.216	-0.324	-0.257	0.502	1.34
2.83	-0.821	3.63	1.42	-1.62	-1.94	-5.09	1.87	-1.61	-1.45	3.14	0.415	-0.857	-5.08	1.71	4.09	0.317	-1.12	-0.593	-0.31	1.5
1.3	-0.75	3.47	1.67	-2.83	0.931	-4.85	2.14	-1.27	-0.696	3.32	0.259	0.364	-4.45	1.47	3.44	0.116	-1.62	-2.97	-2.12	0.8
2.57	0.452	3.46	1.1	-1.7	0.564	-5.58	0.677	-0.983	-1.34	3.95	2.65	-0.22	-3.57	0.705	3.22	0.434	-2.02	-3.47	0.137	0.267
1.71	-0.44	3.36	0.982	-1.33	0.334	-5.07	0.605	-0.235	-0.399	4.36	1.59	0.243	-2.27	1.8	1.85	-0.567	-0.949	-1.87	0.474	-0.277
1.24	-1.04	3.14	0.212	-2.54	-0.735	-4.74	2.41	0.287	-0.126	3.66	0.976	0.69	-3.14	1.64	2.74	0.593	-0.262	-2.6	4.96	-0.502
1.96	-2.75	3.79	0.308	-2.16	-1.22	-4.21	2.97	0.61	1.14	3.15	1.73	-0.103	-2.87	0.89	3.82	0.826	-0.355	-1.9	2.8	0.0984
1	-2.15	4.58	0.77	-1.78	0.237	-4.22	1.75	2.03	-0.908	2.91	1.01	-0.281	-2.68	-0.658	3.63	0.566	0.00271	-2.49	4.29	0.495
1.94	-1.82	3.59	1.27	-2.98	1.07	-4.37	1.29	1.53	0.53	2.46	0.88	-0.549	-2.49	0.218	4.26	0.098	0.933	-1.14	3.47	1.03
2.67	-0.877	1.62	0.901	-1.59	0.653	-3.73	1.01	2.1	0.0763	2.57	-0.026	-1.17	-2.93	0.171	4.5	-0.282	0.193	-2.39	3.71	0.453
1.77	0.556	2.77	0.404	-2.57	-1.17	-4.65	1.58	0.98	-0.293	2.29	1.48	-0.186	-2.27	1.56	3.95	0.147	-0.806	-3.52	-0.0425	0.732
2.09	-0.568	3.79	0.157	-2.09	-0.357	-4.72	1.39	-0.279	-0.922	1.98	1.09	-0.469	-3.16	0.803	4.11	-0.488	-0.75	-2.52	1.87	0.253
2.56	-1.12	2.82	-0.145	-2.83	0.772	-4.35	0.618	-0.192	0.312	1.41	2.05	0.171	-3.85	-0.982	2.36	-0.453	-0.153	-3.52	0.456	0.671
2.29	0.244	5.09	-0.576	-3.11	1.73	-4.1	1.76	-0.358	0.208	1.78	0.499	-1.04	-3.05	-0.0277	1.86	-0.0152	-0.733	-2.64	0.438	0.596
2.78	0.221	1.97	-0.818	-1.67	1.17	-4.99	0.672	0.396	0.623	2	0.195	0.463	-2.91	0.27	1.81	-0.571	-0.898	-2.05	0.52	0.533
2.85	0.783	3.11	-0.466	-1.61	1.68	-4.49	0.356	2.42	0.568	1.44	0.72	0.0426	-2.11	-1.02	2.67	0.327	-0.595	-2.58	0.231	0.175
2.35	-0.478	2.98	-0.0544	-2.13	1.99	-4.1	-0.162	0.785	-0.0755	1.77	-0.724	0.827	-2.11	-0.154	2.31	0.668	-0.819	-3.08	2.62	0.835
2.76	-0.381	3.74	-0.372	-2.23	-2.13	-4.76	0.419	-0.539	0.00191	2.24	-0.000512	0.703	-2.59	0.091	2.49	0.68	-0.555	-2.91	1.77	1.56
2.59	-0.497	4.51	-0.0218	-2.18	-2.1	-4.18	-0.476	0.448	-0.914	2.16	-0.389	-0.617	-2.17	-0.727	4.81	0.967	-1.14	-2.83	1.39	-0.332
3.5	0.825	1.36	-0.062	-3.26	0.189	-4.28	-0.117	0.0617	0.709	2.16	-0.223	-1.18	-2.58	0.257	3.99	0.539	-0.275	-1.6	1.25	-0.486
3.35	0.508	3.65	0.138	-3.44	-0.569	-4.76	-0.0515	0.766	1.05	2.4	0.398	0.0509	-2.63	-0.163	3.04	0.661	0.0238	-1.68	1.04	-0.0897
4.48	-0.807	2.34	0.466	-1.88	-1.11	-5.11	-1.59	-0.229	-0.733	2.45	-1.01	-0.488	-3.3	-0.751	3.15	0.42	0.298	-0.672	0.827	1.07
2.99	-0.657	3.41	0.618	-2.1	-2.54	-5.58	-0.37	-0.505	1.28	2.58	2.3	0.331	-2.25	-1.05	3.23	0.494	0.179	-1.84	0.728	1.41
2.8	0.591	3.25	0.0593	-3.14	-1.16	-6.75	-1.13	-0.769	0.789	1.78	0.318	0.365	-2.48	-1.57	2.95	1.31	-1.1	-2.77	0.36	0.773
2.75	-0.275	1.46	0.544	-2.03	-0.671	-5.85	-1.55	-0.943	0.0671	1.59	0.336	-0.501	-2.84	-0.457	3.45	0.638	-0.246	-1.58	1.26	0.71
-0.374	-0.162	3.03	0.154	-1.81	-1.56	-5.76	-1.07	-0.847	0.477	1.27	-0.253	-0.98	-2.49	-0.766	3.1	0.784	-0.431	-2.34	-1.3	0.845
-0.289	0.263	3.52	0.15	-1.66	-1.61	-4.72	-0.401	-0.659	1.18	1.62	1.23	-0.363	-3.18	0.24	1.93	0.81	-0.608	-3.57	-0.127	0.43
-0.173	0.178	2.94	-0.306	-1.54	-0.507	-5.61	-0.356	-0.671	1.82	1.39	2.55	0.0555	-2.27	0.433	4.02	0.802	-0.434	-1.5	1.27	0.197
1.07	-0.679	2.44	-0.449	-2.17	-0.52	-5.75	-0.666	-0.761	0.54	1.65	1.91	0.336	-1.56	-0.154	3.81	-0.00234	-0.0786	-2.28	1.07	0.872
0.725	-0.0249	2.89	-0.348	-2.98	-0.291	-5.16	-0.888	-1.32	1.47	2.15	2.77	0.164	-1.84	-1.42	3.36	0.954	-0.986	-2.41	-1.35	-0.498
0.331	-0.909	1.53	-0.469	-2.81	-1.98	-5.44	1.54	-1.34	1.24	1.96	0.0907	0.603	-1.97	-2.3	3.87	0.389	-2.19	-0.894	0.738	-0.179
-0.626	0.272	3.25	-0.165	-3.4	-1.69	-5.01	0.688	-1.94	2.46	1.79	-0.886	0.684	-2.41	-1.32	3.18	0.597	-2.34	-2.2	0.085	-0.44
-0.593	0.409	3.24	-0.313	-1.75	-2.86	-4.16	0.828	-1.13	0.795	2.48	-1.3	0.387	-3.02	-0.835	2.11	0.0514	-1.35	-1.54	-0.737	-1.01
-0.157	-0.0362	2.61	-0.202	-1.74	-1.37	-4.88	1.61	-1.58	0.941	2.04	1.01	0.0869	-3.57	-0.701	1.78	0.706	-1.81	-2.8	-1.02	-0.475
-0.111	0.41	1.92	-0.861	-1.83	-0.739	-4.41	0.891	-1.54	3.36	2.12	-0.685	1.82	-3.99	0.579	3.73	0.52	-1.9	-2.54	0.145	-0.239
-0.145	1.12	3.44	-0.759	-2.44	-0.835	-4.7	-0.666	-2.49	1.53	1.99	1.59	-0.318	-4.34	0.0539	2.95	0.422	-1.22	-2.56	-0.225	-0.39
-0.155	0.435	2.98	-0.772	-1.95	-0.677	-4.38	0.204	-2.43	0.792	1.88	0.918	0.151	-2.37	-0.412	3.18	0.808	-0.76	-2.61	0.395	-0.00202
0.9	0.37	4.49	-0.464	-3.21	-0.641	-4.67	0.187	-2.72	0.835	1.6	0.248	0.32	-2.16	-1.81	1.92	1.47	-0.297	-2.16	0.176	-0.201
0.306	-0.768	3.19	-0.903	-4.15	-2.12	-4.89	-0.572	-2.5	2.87	1.32	0.562	-2	-2.79	-0.511	2.99	1.15	-0.398	-2.48	1.64	-0.145
2.18	-0.274	4.11	-1.16	-2.25	-2.09	-5.16	0.611	-2.12	1.05	1.83	0.147	1.53	-3.1	-1.47	3.07	0.245	-0.252	-1.33	0.729	0.37
-0.33	0.836	3.22	-1.09	-2.44	-1.06	-4.01	0.715	-1.05	0.578	1.16	-0.272	0.0173	-2.89	-0.719	3.24	0.64	0.031	-1.6	1.32	0.111
1.84	0.359	3.1	-1.17	-1.87	-0.672	-4.34	0.593	-1.3	0.561	1.37	0.68	-0.187	-2.97	-1.48	3.44	0.611	-0.692	-3.61	0.448	0.326
3.12	-0.325	3.92	-1.56	-2.96	-0.162	-3.88	0.133	-1.15	1.48	1.15	0.675	-0.452	-2.38	-0.483	4.33	0.839	-0.698	-2.28	0.644	-0.164
1.61	0.119	2.69	-1.36	-3.78	-0.58	-4.11	0.493	-0.779	-0.719	1.04	-0.0326	-1.52	-2.05	-0.696	3.74	0.65	0.125	-2.76	-0.00956	0.25
2.76	0.243	3.35	-1.48	-4.11	-1.12	-4.69	0.415	-1.46	1.99	1.39	-0.0233	-0.515	-1.13	-1.17	3.64	0.443	-0.484	0.202	1.04	0.501
1.26	0.488	3.14	-1.07	-2.58	-2.44	-4.61	1.51	-1.25	0.468	1.67	-0.0621	-0.842	-0.337	-1.24	2.2	0.161	-0.583	-0.652	0.242	0.396
1.08	0.715	3.23	-1.57	-2.84	-1.25	-5.66	-0.216	-1.22	1.11	1.51	-0.173	-1.31	-0.975	-0.623	3.87	-0.0947	-0.552	-1.82	-0.167	0.238
0.753	1.08	2.83	-1.29	-2.46	-0.63	-4.64	0.766	-0.822	-0.128	1.62	-2.32	-0.454	-2.46	-0.78	3.84	0.788	0.377	-2.97	0.464	0.0349
1.88	0.453	3.72	-1.56	-1.86	0.298	-3.72	1.56	-0.475	0.803	1.43	-2.32	0.101	-2.82	-0.652	2.98	1.06	0.595	-2.16	0.751	0.814
1.23	-0.103	2.83	-0.837	-2.55	0.659	-2.98	1.29	-0.42	0.95	1.84	-0.787	-0.723	-2.79	-0.72	2.65	1.83	0.391	-2.31	-1.54	0.0739
1.2	0.246	3.27	-0.665	-2.33	1.12	-1.91	0.847	-1.59	0.87	2.04	0.0503	0.787	-2.96	-0.291	2.16	0.849	0.63	-0.245	0.211	-0.0678
0.849	1.66	2.72	-0.179	-3.05	-0.67	-2.99	1.04	-1.87	0.659	1.75	-0.499	0.168	-2.7	-0.141	2.17	0.468	0.865	-3.03	2.15	-0.00812
-0.0131	1.07	4.11	-0.761	-2.54	-0.923	-3.81	0.54	-1.16	1.71	2.98	-0.0427	1.05	-3.05	-0.779	2.93	0.686	0.696	-1.15	3.37	-0.65
0.886	0.339	2.91	-1.09	-2.83	0.466	-3.85	1.07	-1.42	0.694	2.58	-0.617	-0.188	-3.43	-0.574	4.07	0.294	1.33	-2.03	-0.136	-0.599
-2.34	0.241	2.72	-0.711	-2.57	-0.329	-4.88	0.785	-1.46	1.87	2.94	0.042	0.644	-2.97	-0.817	1.97	0.55	0.319	0.0353	-1.39	0.698
-2.06	1.41	2.41	-1.47	-2.44	0.807	-4.89	0.713	-1.48	1.44	3.57	-1.43	-0.247	-3.2	-0.988	1.7	0.232	0.389	-1.61	-1.59	1.67
0.217	0.503	3.55	-1.05	-0.229	-1.45	-5.69	0.576	-1.21	-1.2	2.8	-1.81	0.116	-3.24	0.3	2.01	0.951	-0.297	-2.12	-1.41	1.01
-0.99	-0.273	3.08	-1.36	-1.29	-1.15	-4.02	2.69	-1.65	1.94	2.66	-1.36	0.143	-3.84	-0.87	2.24	0.457	-0.509	-1.95	-0.591	1.27
0.32	-1.15	2.3	-0.693	-2.14	-1.06	-3.93	1.31	-2.87	0.287	2.12	-2.29	-0.283	-4.23	-1.28	1.97	0.246	-0.826	-2.38	-0.716	0.331
-0.864	-0.442	4.05	-0.133	-1.53	-0.127	-3.94	1.57	-2.7	0.161	1.95	0.904	-0.303	-4.16	-1.91	3.73	0.518	0.285	-2.32	-1.87	0.583
-1.22	-0.157	4.04	-0.444	-1.74	0.0983	-3.66	0.0478	-2.88	0.166	1.28	-1.03	-1.01	-3.61	-0.797	1.85	1.23	0.487	-0.754	0.0683	0.856
0.116	0.682	3.61	-0.0442	-3.01	0.167	-4.18	0.186	-2.67	-0.551	1.52	-1.12	-1.11	-4.17	-1.77	1.45	1.08	0.193	-2.41	2.1	1.5
0.618	-0.951	3.02	-0.71	-2.88	-2.17	-3.86	0.169	-2.04	0.0728	1.8	-0.866	-1.51	-3.34	-1.46	1.13	0.964	-0.706	-1.41	1.89	1.59
1.48	-0.485	2.57	-0.897	-1.51	-0.807	-4.63	1.1	-0.703	0.0997	1.58	-0.103	0.781	-1.66	-0.987	1.66	1.55	-1.15	-2.82	-0.408	0.939
-0.474	-1.06	3.62	-0.968	-2.42	0.501	-4.84	-0.632	-1.09	1.63	1.7	0.227	-0.014	-2.93	0.629	2.13	2.2	-1.17	-2.04	-1.15	1.41
1.35	-1.66	4.58	-1.17	-2.4	-0.592	-5.36	0.365	-1.57	0.199	1.81	0.441	0.0596	-2.66	0.917	4.12	1.26	-0.248	-0.989	-0.346	1.05
1.01	-0.579	4.42	-1.05	-4.11	-1.45	-5.29	0.69	-2.41	1.13	1.68	-1.26	1.2	-2.86	0.718	2.92	0.777	0.296	-1.51	1.24	1.29
-0.00911	-1.66	3.63	-0.322	-1.86	-1.46	-5.41	-0.362	-1.53	1.59	1.65	0.163	1.04	-2.83	0.297	3.33	0.0427	1.45	-0.791	0.303	0.375
-1.65	-0.973	4.56	-0.252	-2.07	-1.23	-4.8	1.01	-1.08	0.5	1.04	0.308	0.318	-3.08	0.135	2.11	0.121	1.26	-2.12	-1.09	-0.984
-1.81	0.117	4.77	-0.61	-1.94	-0.571	-6.11	0.763	-2.37	0.616	1.29	-0.318	-1.6	-2.18	0.0998	0.946	0.4	1.78	-0.681	-1.57	-0.4
-1.3	1.09	4.71	-1.23	-1.59	-0.704	-6.64	0.701	-0.897	1.77	1.23	0.0184	1.24	-1.97	-1.58	0.754	0.256	0.781	-2	-0.534	-0.71
0.522	0.781	2.94	-1.5	-1.4	-0.245	-6.08	0.495	0.394	0.372	1.62	-1.81	-0.702	-1.88	-0.565	2.56	0.0883	1.65	-1.24	-0.166	-0.049
0.787	-0.275	3.83	-1.7	-2.76	0.489	-4.77	-0.67	1.63	-0.583	0.663	-0.845	0.0481	-1.29	-0.452	2.4	0.575	0.86	-1.24	-0.33	-1.18
-0.0351	0.168	2.97	-1.44	-2.28	0.258	-4.42	0.535	0.238	-1.69	0.883	-1.05	0.567	-1.54	0.823	1.88	0.851	0.61	-1.58	-0.0468	-1.86
-1.33	0.679	5.06	-0.918	-2.17	1.23	-4.39	-0.343	0.325	2.2	1.2	-0.0926	0.677	-2.45	-0.367	1.49	0.467	0.615	-1.88	-0.592	-1.71
-2.87	0.231	5.24	-0.704	-2.2	0.432	-4.99	-1	1.09	2.5	1.83	-0.735	-0.601	-2.01	0.278	1.08	1.04	-0.282	-1.71	-0.838	-0.691
-2.24	0.816	4.66	-0.869	-2.68	1.54	-5.47	-0.743	-1.08	1.07	2.28	0.743	-0.484	-2.35	-1.19	0.611	1.38	-0.934	-1.33	-0.92	-0.94
-0.931	-0.243	4.23	-1.23	-3.23	1.12	-5.36	-0.665	-1.88	0.218	2.21	0.07	-0.705	-2.18	-0.121	1.66	1.02	-0.185	-0.509	-0.296	-0.632
0.424	-1.45	4.56	-1.09	-2.57	0.85	-6.86	-1.45	-0.616	1.73	1.94	0.106	-1.46	-3.62	0.49	1.79	1.25	0.0314	-2.77	-1.39	-1.07
-1.02	0.0769	2.65	-0.624	-1.84	0.725	-6.01	-0.453	-1.03	1.48	1.42	0.108	0.42	-3.28	1.18	2.7	1.26	-1.23	-2.72	-2.03	-0.965
-0.64	-1.14	2.27	-0.0685	-0.468	2.08	-4.65	-0.859	-0.977	0.278	2.62	-0.762	0.214	-2.89	1.99	0.302	1.31	-1.4	-2.05	-0.118	-0.824
-2.93	-0.0705	4.5	-0.336	0.148	1.41	-4.7	-1.09	-0.436	-0.234	4.02	0.955	-0.589	-2.41	0.241	1.17	1.14	-1.14	-0.581	0.0143	-0.865
-2.43	0.756	3.87	0.179	-0.252	1.01	-4.64	-1.75	-0.0207	-0.0494	5.56	0.203	0.096	-3.26	0.0781	0.172	0.609	-1.32	-1.65	-2.46	-0.871
-2.08	0.359	3.36	-0.447	-0.974	1.46	-5.19	-1.24	-0.398	1.44	5.11	-0.046	-0.117	-3.29	0.939	2.53	0.83	-1.02	-1.45	-1.96	-0.43
-1.71	1.59	3.84	-0.503	-0.985	0.75	-5.61	-0.416	0.146	0.792	4.5	-0.686	-0.564	-2.86	-0.547	1.56	0.417	-1.29	-1.55	-1.78	-0.45
0.632	0.653	3.74	-0.571	-0.259	-1.3	-4.64	-0.255	0.399	0.0893	4.69	1.16	0.17	-2.82	0.559	1.87	0.551	-1.08	-2.02	-1.25	-0.329
-0.373	0.0404	2.88	-0.0802	-3.38	-0.0781	-2.19	-0.627	1.97	0.397	4.19	2.38	0.168	-2.82	0.925	2.43	0.728	-1.34	-1.5	-1.4	-0.378
-0.361	0.598	3.15	-0.177	-2.31	0.496	-1.31	-0.611	2.48	-0.661	3.17	0.965	0.748	-3.64	0.0289	1.4	1.22	-0.29	-1.6	-2.14	-0.498
-0.506	1.19	1.29	-0.248	-0.97	-0.696	-1.93	-0.569	1.39	-0.783	2.68	2.45	1.01	-4.07	1.86	0.777	1.75	0.731	-1.44	-1.38	-0.215
-1.34	0.611	3.08	-0.0293	-0.615	0.0714	-2.47	-1.6	2.1	0.273	3.05	0.144	0.0738	-3.37	2.32	1.04	1.24	0.783	-1.14	-3.32	-0.909
-1.57	0.816	3.53	0.0801	1.75	-1.09	-2.87	-0.853	0.597	2.01	2.7	0.547	-0.614	-3.76	4.32	-0.341	1.14	-0.101	-1.05	-2.73	-0.464
-0.281	0.589	3.38	-0.036	-1.64	-1.64	-2.12	-1.87	1.26	-0.682	2.97	2.19	0.352	-3.05	2.53	1.19	1.33	0.101	-2.37	-1.53	-0.874
-0.907	-0.0108	3.17	0.195	-0.565	-2.25	-1.97	-0.351	1.27	-0.398	2.9	-0.432	0.569	-0.889	2.62	3.69	0.578	0.086	-1.18	-2.39	0.152
