# Supplementary material for: Metabolic sensing in AgRP neurons integrates homeostatic state with dopamine signalling in the striatum
Source: eLife journal article supplement (doi:10.7554/elife.72668), 2022-01-12
Supplement: fig2-data1 [file Fig2F.xlsx]

## Sheet: Sheet1
	WT							KO
NFO	0.746439	2.18668	-0.232075	1.20203	0.979073			1.13095	-0.311913	-0.18897	-0.217551	-0.198757	0.206727	-0.0756862
Chow	2.38567	3.0404	0.872891	4.04207	1.53854			1.323	0.642933	2.73014	3.30429	0.608541	1.31747	0.24689
PB	4.03715	6.67574	4.12504	6.48207	4.2033			3.6214	3.34403	2.35652	0.355544	0.511485	-0.552099	1.5352
