# Supplementary material for: Metabolic sensing in AgRP neurons integrates homeostatic state with dopamine signalling in the striatum
Source: eLife journal article supplement (doi:10.7554/elife.72668), 2022-01-12
Supplement: fig2-data1 [file Fig2G.xlsx]

## Sheet: Sheet1
	WT							KO
NFO	-0.897346	1.70494	0.82194	0.372935	0.429062			2.0604	-0.648571	0.621949	0.0276868	-1.16515	-0.027313	-3.17131
Chow	1.71472	1.04609	-1.26256	2.65617	0.0184382			-0.0645333	-0.482322	0.826538	2.73587	0.052233	0.415036	-2.62214
PB	2.63713	3.78252	0.36704	2.5016	3.3742			-0.0275296	3.14821	1.03747	-0.702877	-1.84656	-0.512289	1.92834
