# Supplementary material for: Metabolic sensing in AgRP neurons integrates homeostatic state with dopamine signalling in the striatum
Source: eLife journal article supplement (doi:10.7554/elife.72668), 2022-01-12
Supplement: fig2-data1 [file Fig2H.xlsx]

## Sheet: Sheet1
NFO								CHOW								PB
-0.123	-1.13	2.04	-0.354	-1.35	-0.208	-1.87		1.29	1.18	-0.162	1.11	0.351	-0.426	-0.17		2.32	-1.82	-0.783	-0.554	-1.07	0.771	-0.408
-0.149	-0.575	0.66	0.427	0.478	-1.11	-0.764		0.936	1.11	-0.798	0.538	-1.33	-0.609	-0.323		1.23	-0.838	-0.0167	1.85	0.664	-0.496	0.126
0.952	-0.504	2.32	-0.966	0.0671	0.51	-1.3		1.21	0.734	1.08	-0.0787	-0.0587	0.838	-0.384		2	-2.34	0.843	2.08	0.722	-0.802	0.817
0.743	-0.964	0.487	2	-1.52	-1.06	0.281		1.38	1.49	-0.838	-1.28	0.225	1.6	-0.837		1.38	-1.34	0.0843	-1.05	0.362	-1.07	-0.965
-0.164	-0.645	-0.255	0.627	-0.852	-0.733	0.473		1.16	0.958	-1.07	1.15	0.654	0.0754	-0.458		0.0801	-1.22	-0.246	-0.0389	1.32	-1.37	-0.984
-0.289	0.0218	0.535	-1.08	-1.21	-1.03	0.697		1.14	1.04	-1.5	-0.524	-1.08	0.617	0.693		0.364	0.00926	-0.755	-0.0968	-0.543	0.969	-0.289
-0.0183	0.0532	-0.322	0.252	-0.74	-0.449	1.1		0.492	0.917	-1.67	0.418	1.76	-0.824	0.406		-0.217	-0.491	-1.92	0.0715	0.12	-1.5	0.185
0.656	-0.242	-0.243	0.888	-1.64	-0.495	-0.555		0.381	0.484	-2.56	-0.364	0.854	1.59	-0.438		-0.361	-0.63	-0.284	-0.913	-0.968	-0.141	1.58
0.288	0.321	-0.577	0.0469	0.405	0.199	-0.555		1.53	0.658	0.264	1.13	0.239	1.79	-0.436		-1.57	-1.3	-1.96	0.0621	1.24	-1.16	0.837
0.793	0.317	0.195	2.7	0.425	0.451	-1.2		0.385	1.45	-0.465	-0.442	-0.461	-0.47	-1.14		0.704	0.824	-1.76	0.867	0.555	-1.24	0.569
0.661	0.186	-0.0415	1.88	-0.00901	1.1	-0.405		0.745	1.21	0.00561	-0.685	-0.491	-0.882	0.335		0.476	-2.33	-0.0132	0.145	-0.852	0.158	1.12
1.19	-0.321	-1.8	1.07	-1.04	-0.0103	0.105		1.22	0.986	-1.76	-0.18	0.0739	0.478	1.55		1.12	1.32	-0.388	0.488	-2.02	-0.666	0.479
0.661	-0.219	-1.08	0.754	0.17	1.04	0.0388		0.699	0.739	-0.337	-0.497	0.497	0.281	1.22		1.1	-2.43	-1.52	1.91	-0.66	0.898	1.57
0.874	-1.51	-0.452	-0.131	-2.27	-0.613	2.1		0.559	1.03	-0.399	1.45	1.41	1.9	1.06		1.11	1.18	-2.69	0.307	0.205	1.06	1.19
0.312	-0.579	-1.71	-0.0274	-0.92	0.904	1.01		0.849	0.957	0.919	-0.187	0.151	0.494	-0.271		0.673	-0.46	-0.908	-0.257	-0.873	0.215	1.47
0.435	-1.17	-1	1.88	-1.82	2.4	1.41		0.431	0.0688	-0.571	-0.824	0.66	1.44	-1.26		0.396	-0.453	0.0555	0.992	-0.00745	-0.683	0.575
0.826	-0.691	-0.525	2.73	-1.11	2.28	0.291		0.596	-1.61	-0.578	-0.123	0.475	0.771	-0.797		0.513	-0.896	-0.591	-0.195	0.195	1.58	0.174
0.941	-0.734	0.36	1.96	-1.01	0.807	0.187		1.36	0.157	0.131	0.33	0.717	-1.51	-0.717		1.04	-0.3	1.35	1.53	-0.294	0.526	-0.103
1.39	-0.942	-0.575	1.11	-0.493	0.077	0.94		0.828	0.76	-0.16	0.57	-0.543	-0.902	-0.24		1	-1.4	-0.949	-1.2	0.675	-0.248	0.511
0.101	-0.874	-0.339	1.26	-1.54	1.78	0.0663		0.827	0.482	-1.62	0.333	-0.636	1.66	-0.436		0.941	0.399	-0.706	0.868	0.359	-0.806	0.254
1.13	-0.895	-1.39	-0.0972	-0.287	1.22	-0.494		0.713	1.69	-0.557	1.33	-1.11	0.881	-1.13		1.17	-0.679	0.263	0.875	-0.198	-1.53	0.0992
0.974	-0.0592	-0.623	-1.01	-1.39	1.97	1.05		1.19	0.963	-0.86	0.55	-0.926	0.472	-1.06		0.145	-0.577	1.39	0.629	-0.465	0.285	-0.228
1.13	0.518	0.723	-0.274	-2.13	1.55	0.764		1.82	0.223	-1.52	-1.4	-0.372	0.596	-0.698		0.174	1.47	0.449	-0.824	0.604	0.564	-1.13
0.451	0.455	-0.00298	-0.807	-2.39	0.484	0.564		1.85	-0.291	0.0537	0.728	-0.493	-1.16	-0.0447		0.609	0.506	-0.48	1.16	-2	-0.445	-0.19
0.141	0.954	-0.134	-0.156	-0.252	1.06	0.0663		0.879	0.0909	0.723	0.79	-1.67	-0.594	0.751		-0.442	0.582	0.022	0.658	1.45	-1.37	-1.75
-0.172	0.481	0.0106	0.881	-1.88	1.29	0.657		0.621	0.0857	0.871	-0.456	-1	-1.03	0.766		1.52	-0.725	1.13	0.37	0.00777	-2.79	-0.869
-0.299	0.655	0.73	1.12	-0.376	2.98	-0.0518		-0.0484	0.133	0.427	-0.481	-0.731	1.52	0.178		1.11	0.105	0.626	0.528	1.41	-0.673	-0.893
-0.215	0.538	0.518	0.354	-0.967	1.15	-0.168		0.187	-0.239	1.13	0.123	-0.338	3.26	-0.865		1.53	0.107	1.83	0.0302	1.58	-2.17	-0.829
0.0804	1.4	-0.337	0.968	-0.0106	0.812	0.366		-0.944	-0.469	1.1	0.389	-1.4	0.789	-0.717		-0.857	-0.619	0.403	0.435	0.312	-0.793	-2.05
0.455	0.939	-1.31	0.146	-0.663	0.255	-0.524		-0.118	-0.391	-0.0955	1.56	-1.61	1.04	-1.5		-0.329	0.0731	-1.64	-0.387	-0.97	-0.0556	-0.627
0.695	1.34	-1.61	-0.638	1.26	1.55	-1.39		-0.376	-1.04	0.52	1.31	-0.0285	1.9	-0.354		0.458	-0.921	-0.331	1.11	-1.01	1.68	-0.862
0.592	0.172	-2.12	-0.765	0.971	0.838	-1.16		0.235	-0.591	1.34	1.36	-0.0749	-0.0433	0.529		0.349	-1.46	-1.17	-0.427	-1.18	0.746	-0.799
0.214	-0.626	0.105	-0.388	1.12	0.713	-1.12		-0.195	-0.0811	0.962	0.425	-0.86	-0.444	1.55		0.276	-2.29	-0.992	1.16	0.733	-0.448	-1.38
-0.757	-0.517	-0.0664	-0.614	-0.13	-0.428	-0.98		-0.84	-0.202	-1.02	0.205	-0.637	-1.72	1.7		0.151	-1.08	-0.433	0.588	-0.136	-0.877	-0.0723
-0.507	-0.422	0.92	2.04	0.734	-0.902	-0.533		-1.38	-0.576	-1.35	1.44	-1.27	-1.53	-0.141		0.447	-0.685	0.602	0.139	-1.1	1.86	-0.105
-0.639	-0.214	-0.73	0.564	2.31	-0.0758	-0.0127		-2.15	-0.167	-1.32	0.967	0.795	-1.32	-1.03		0.927	0.138	-0.571	-0.00336	1.1	0.181	1.1
0.319	-0.219	-2.02	0.659	1.88	-0.781	-1.17		-2.06	-0.253	-0.546	0.375	0.589	0.327	-0.494		0.84	-1.82	-1.96	1.66	0.00332	0.913	0.232
-0.197	0.0182	-0.918	1.13	0.117	-1.15	-0.864		-2.49	-0.375	0.673	-0.398	-0.836	0.377	0.204		1.07	-0.763	-1.34	-0.834	-1.67	1.75	0.706
0.149	-0.813	0.025	-0.399	0.463	-0.416	-0.608		-1.01	-0.0856	-0.504	0.3	-0.929	1.06	-0.141		-0.25	0.0832	-1.17	1.03	-1.48	0.281	0.895
-0.315	-0.777	-0.809	-0.629	0.0317	-0.00897	-1.53		-0.819	-0.0982	-1.23	0.992	-0.778	-1.18	-0.69		-0.00439	-0.535	1.01	-0.64	0.919	-0.518	0.619
-0.161	-0.755	0.955	-0.598	0.379	-0.226	-0.865		-0.824	-0.213	-1.18	1.41	-0.309	-0.695	-1.58		-0.521	-0.666	1.39	-0.516	-0.213	-2.24	0.173
-1.28	-1.41	-0.638	-1.92	1.04	0.163	-0.53		-1.14	-0.67	-0.169	1.08	-0.917	-0.82	-1.56		-2.06	1.42	0.46	0.304	1.06	-1.61	0.0586
-2.14	-1.03	-0.344	-1.63	-0.355	-1.06	-0.381		-1.3	0.308	-0.48	-0.861	-1.3	-0.32	-1.66		-1.94	0.179	-0.252	0.139	-0.802	0.691	1
-0.566	-1.53	0.254	-0.648	-0.624	-0.224	-0.552		-1.39	0.0666	0.927	2.27	-1.72	-1.18	-2.76		-1.96	-0.148	-0.018	-1.13	-0.868	-0.37	-1.28
-1.33	-1.19	-2.08	-1.02	0.125	0.585	-1.91		-1.5	0.249	1.2	1.65	-0.416	-0.269	-2.06		-1.98	1.51	0.112	-1.06	-0.746	-0.0849	-1.11
-1.77	-0.262	-0.352	0.266	-0.108	0.52	-1.72		-1.77	-0.185	-0.635	-0.0835	-1.16	-0.0129	-1.73		-1.53	0.621	0.808	-0.492	-1.05	-0.223	-0.888
-2.46	-0.392	0.38	-0.499	-0.512	0.104	-1.61		-1.29	0.503	-0.931	-0.625	-0.61	-0.682	-0.161		-1.41	0.746	0.125	-0.696	1.55	-0.139	-0.533
-2.14	-0.407	0.255	-0.346	-0.232	-0.542	-0.00299		-1.44	0.792	-1.38	-0.229	-0.573	-1.9	0.108		-1.44	-0.46	-0.736	-0.171	1.51	0.145	-0.536
-1.76	-0.747	0.587	0.257	1.81	-0.723	-1.1		-0.842	0.521	0.254	-0.125	-0.862	-1.07	-0.956		0.00431	-0.402	2.36	0.135	-0.956	-1.72	0.145
-1.41	-1.23	-0.354	-0.562	1.3	0.416	0.299		-2.15	0.313	1.11	-0.779	-1.42	-0.711	-1.29		-0.306	1.27	0.434	-0.362	0.153	-1.25	-0.0809
-1.43	-1.12	0.503	-1.28	-0.693	-0.58	-0.847		-1.73	0.281	0.913	0.0298	-0.212	-1.98	-1.77		0.668	0.0578	0.547	0.765	-0.166	0.792	-0.673
-0.396	-0.421	-1.04	0.725	-1.21	-0.723	-1.45		-1.62	0.173	-0.567	-0.337	-0.638	-0.853	-1.31		0.838	-0.102	-1.08	-0.824	-0.107	0.233	-0.656
-1.27	0.0494	-0.143	1.05	-0.385	-0.821	-1.31		-2.15	0.313	-1.02	-0.217	-1.81	0.0819	-0.0917		0.201	0.823	0.471	1.39	-0.337	0.0475	-1.07
-2.41	-0.45	-1.05	-0.856	0.225	-1.19	0.235		-1.37	0.708	-0.00633	-0.857	-1.07	0.984	0.66		0.284	0.0328	-0.37	0.239	-0.584	0.0144	-2.33
-1.5	-0.95	1.08	1.49	1.47	0.12	0.0729		-1.06	0.247	-0.633	-0.919	-0.939	-0.0872	1.09		-0.65	0.46	-0.0438	0.363	-0.458	0.0367	-2.04
-1.49	-1.64	-0.336	-0.595	1.19	-0.696	0.594		-0.163	0.343	0.613	-0.00347	-1.5	-0.146	0.274		-0.856	1.41	0.494	1.75	0.714	0.629	-1.77
-1.17	-0.649	-0.745	0.0407	-0.204	-1.88	1.01		0.0329	0.886	0.426	-0.569	-1.59	-0.672	1.04		-0.56	0.603	1.8	-0.361	0.409	1.35	-1
-2.2	-0.547	-0.831	-0.693	0.628	0.537	0.0727		-0.811	0.475	1.05	-0.35	-0.851	-0.28	2.02		-1.24	-0.672	-0.00499	0.589	-1.06	1.23	-0.314
-1.17	-0.329	-1.28	0.112	0.0627	-0.613	-0.0613		-0.0426	0.353	-0.411	-0.0649	-0.927	-0.319	2.28		-0.293	0.6	0.647	0.61	0.571	1.49	-0.997
-1.26	-1.41	-1.07	0.12	0.316	-2.23	0.614		0.204	1.21	0.24	-0.165	0.0751	-1.39	3.45		-0.548	0.648	0.384	-0.896	1.97	0.808	0.377
-1.15	-1.02	0.336	-0.0641	0.707	0.0574	0.521		-0.508	0.463	2.18	-0.135	1.2	-1.12	1.66		0.58	0.858	-0.32	-0.279	-0.531	2.09	0.661
-0.233	-0.895	1.32	-1.26	0.91	-1.9	0.5		-0.799	0.952	1.41	0.195	0.795	0.105	1.23		-0.788	0.062	1.77	0.0758	1.33	0.483	2.14
-1.1	-1.55	-0.00446	1.43	1.13	-1.6	0.844		0.0559	0.265	0.0362	-0.978	0.061	-1.1	1.06		-0.883	0.38	1.8	-0.603	0.824	0.0169	0.752
-1.02	-1.13	0.133	-2.54	1.16	-0.0556	1.38		-0.435	1.48	2.61	1.88	-0.812	0.708	1.41		-1.79	1.98	1.34	0.147	-0.693	-1.46	1.09
-1.12	-1.62	-0.729	-0.339	0.996	-1.37	1.44		0.729	1.36	1.27	1.48	1.25	0.188	0.485		-2.67	0.871	0.337	0.278	0.0693	0.353	-0.56
-0.734	-0.732	-0.415	-0.135	0.423	-1.57	1.28		0.193	1.22	0.783	-1.43	0.0927	0.322	0.579		-0.068	1.47	0.703	0.884	-1.93	2.11	0.198
-0.178	-0.4	0.578	-0.859	0.806	-1.84	0.884		0.0313	0.499	-0.382	-0.584	0.874	0.919	0.273		-0.343	0.936	0.606	-0.779	-0.458	0.6	0.345
-0.141	-1.29	-0.599	0.52	0.0533	-0.959	0.466		1.14	0.925	-0.261	-0.000436	-1.81	0.338	0.695		-0.148	-1.19	-0.0854	1.3	-0.0544	-1.32	-1.87
-0.524	-1.09	-0.887	-0.638	0.393	-0.141	1.52		2.47	0.792	-0.582	-1.99	1.1	0.239	-0.0315		1.06	0.969	0.797	-2.17	0.126	1.58	-1.85
-0.236	-0.512	-1.75	0.00595	0.38	-0.667	1.51		0.561	1.13	0.423	-0.369	0.725	-1.05	0.371		0.379	0.545	-1.48	-1.74	1.18	-0.243	-0.572
0.327	-1.13	-0.401	-0.149	0.521	-0.228	1.33		0.567	1.17	0.944	1	1.04	-0.394	-0.0529		-0.541	0.43	-0.832	-0.269	1.77	0.158	-0.428
0.143	-0.242	-0.573	-2.41	0.237	-0.39	1.5		-0.476	1.01	0.523	-0.452	1.11	1.95	0.566		0.434	-1.5	1.31	0.418	1.02	1.14	-0.615
0.0672	0.913	-0.0131	-0.561	0.763	0.545	0.911		0.31	0.109	0.75	0.497	1.22	0.0915	0.463		-0.451	0.606	-0.351	-0.216	-0.112	-0.239	-0.819
-0.0865	0.533	-0.596	-1.22	0.249	-1.93	1.52		1.31	-0.511	-0.539	-0.815	1.23	0.889	0.751		1.09	-0.299	0.305	0.303	1.12	-0.2	-1.51
0.343	0.914	0.055	-0.984	0.547	-1.03	1.04		0.815	-0.643	-0.0409	0.0653	-0.413	-0.786	-0.0133		0.297	0.0091	-0.16	-2.02	-1.6	0.172	-0.791
0.133	0.917	0.294	-0.589	1.34	-1.2	1.46		0.274	0.192	0.502	-1.6	0.117	-0.254	0.184		1.02	0.311	-0.582	-1.43	-1.15	1.14	0.421
0.404	0.475	0.602	0.906	-1.28	-0.25	1.45		0.846	0.416	0.372	-0.277	1.46	0.121	-0.573		-0.754	0.667	-0.315	1.69	-1.05	0.372	-1.1
0.514	0.849	0.241	0.872	0.971	-0.0936	1.11		0.41	0.0794	-0.155	0.498	0.708	-0.0295	-0.348		-1.28	1.06	0.0778	-0.642	0.214	0.723	-1.13
1.02	1.66	1.7	0.168	0.573	-0.214	1.47		0.249	0.148	1.95	1.68	-0.501	0.0348	-0.521		-0.45	0.203	0.576	0.0926	1.9	-0.856	-0.811
-0.305	1.23	0.353	0.614	0.654	0.45	1.69		0.327	0.091	0.735	0.595	1.11	0.23	-0.897		0.746	0.314	-0.742	1.17	1.93	-1.08	-0.0965
0.712	2.08	0.0723	0.342	1.53	-0.0738	0.409		0.756	-0.744	-0.568	1.12	0.969	0.484	-0.114		2.08	0.472	-0.293	-0.342	0.712	-0.564	0.606
-0.066	1.61	1.44	-0.467	0.261	-0.428	-0.0686		0.424	-0.897	-0.286	2.17	0.768	0.961	-0.71		1.37	1.28	-0.553	0.522	-1	0.0342	-0.604
0.0382	2.06	-0.00747	-0.869	1.37	-0.576	0.822		0.355	-1.02	-1.14	1.15	0.321	0.0103	-0.35		0.649	-0.701	-0.549	-0.572	0.288	0.466	0.399
0.694	1.28	0.982	-1.69	0.602	0.703	0.295		0.434	-0.95	-0.193	-0.239	1.51	-0.829	0.058		-0.769	0.396	-1.07	1.41	-1.35	-1.24	0.834
1.17	1.31	0.332	-0.573	1.39	-0.746	-1.4		-0.0513	-0.939	2.93	-0.33	0.0577	-0.322	-0.0481		-0.849	-0.702	-0.505	-0.241	-1.9	0.963	1.48
2.15	1.12	2.33	0.119	1.04	0.713	0.501		-0.742	-0.337	1.33	-1.64	0.221	-0.411	0.163		-1.16	0.676	0.162	-1.35	0.335	0.342	1.47
1.53	1.32	1.28	0.0387	1.2	0.84	0.991		-0.225	-0.33	0.0876	0.0359	0.927	-0.258	0.0711		-1.35	0.78	-1.22	0.794	0.0653	-0.562	1.08
1.57	0.192	1.38	-0.51	-0.315	1.6	-1.14		-0.247	-0.663	-1.04	0.688	-0.255	-1.51	-0.026		-0.759	0.845	0.13	-0.769	0.529	-0.815	0.827
1.13	0.422	2.87	-0.514	0.938	0.0802	-0.505		0.272	-0.957	-0.817	0.806	1.22	-0.148	0.745		0.503	2.81	-0.0886	-1.78	-1.17	0.873	0.195
0.571	1.76	-0.1	-1.6	-1.2	0.189	-1.67		0.0665	-1.24	-1.19	-1.87	-0.0702	-1.28	0.957		0.609	-0.363	-1.09	0.851	-0.668	0.962	0.0863
0.843	1.54	0.967	0.648	0.00758	1.17	-2.18		0.617	-2.5	0.65	-2.25	1.73	0.875	0.515		1.32	0.337	0.106	-2.94	-0.84	-0.0392	0.626
1.61	1.53	0.775	-0.275	0.18	0.551	-1.45		-0.303	-1.98	2.13	-1.36	0.396	0.863	0.983		-0.0831	-0.292	1.77	-0.232	-1.93	-0.354	1.25
2.08	0.771	1.53	1.08	-0.874	0.276	0.172		1.06	-2.12	0.997	-1.73	0.469	0.961	1.41		-0.134	1.76	-0.205	0.548	-0.368	-0.598	1.73
0.734	0.654	1.93	-0.184	-0.347	0.281	0.242		-0.107	-1.98	0.392	0.118	0.369	-1.85	1.21		-1.07	-0.296	1.15	1.08	0.602	-1.36	1.28
1.23	1.32	0.966	-0.723	-0.886	1.53	-0.428		-0.337	-2.46	-0.119	-0.247	1.3	0.213	0.855		-0.814	0.75	-1.47	-0.103	0.77	1.05	1.24
0.0753	1.63	0.446	0.924	-1.25	-0.27	-0.315		-0.527	-2.22	-0.816	-1.36	1.58	-1	0.233		-0.122	-1.12	0.203	-2	0.853	0.831	0.848
0.842	1.39	1.13	-0.506	-0.203	0.478	-1.4		0.138	-2.17	-0.655	-0.822	2.03	0.546	0.478		-1.32	1.07	1.28	-0.788	0.905	1.05	0.994
0.355	1.6	0.67	-0.114	1.1	-0.557	-0.545		-0.0896	-2.15	-0.646	-0.236	2.28	-0.432	-0.266		0.00655	-0.302	1.74	-0.543	1.73	0.909	1.74
0.277	1.62	1.26	0.44	-0.544	-0.612	-0.976		-0.641	-2.55	0.526	-1.83	0.691	1.52	-0.584		-0.288	-0.457	1.9	-1.98	-0.56	0.0588	1.29
1.4	1.47	-1.33	-0.587	-1.49	0.834	-0.597		0.285	-1.09	0.681	-1.57	-0.373	0.96	-0.377		-0.411	-0.743	0.956	-2.19	0.38	0.35	0.888
0.936	1.15	-0.972	-0.258	-0.692	-0.489	-0.0781		0.0623	-1.67	-0.829	-2.09	2.27	0.464	-0.632		-0.721	0.794	0.873	0.512	1.04	-0.293	1.22
1.56	0.534	0.33	-0.275	0.339	-0.699	0.31		0.26	-1.76	0.328	-0.347	-0.189	-0.864	-1.61		-1.17	0.569	1.1	-1.33	1.78	-0.806	1.04
1.23	-1.13	0.552	-0.111	-0.884	0.456	-0.531		0.101	-1.17	1.1	-0.728	-0.148	-0.119	-1.63		0.975	-0.503	-1.29	0.634	0.329	-0.952	0.714
0.883	-1.5	-0.0385	0.73	-0.371	0.845	-2.03		0.0542	-0.595	0.568	-1.6	0.166	1.86	-1.65		1.15	-0.28	0.598	-0.434	-0.17	0.532	0.978
0.507	-1.32	0.476	0.827	0.221	1.57	-1.47		0.0902	-0.981	-0.221	-1.43	0.0105	0.74	-1.2		0.803	-0.367	1.21	1.05	1.22	-0.621	1.11
0.0817	-1.77	0.615	1.35	-1.59	-0.473	-0.431		-0.156	-0.583	-0.0724	-1.7	2.38	-0.162	-0.0345		1.37	-1.48	0.35	0.487	1.51	0.309	1.59
0.683	-1.82	0.727	1.03	0.453	-0.89	-1.01		0.303	-0.587	-1.35	-2.22	1.05	-0.621	-0.901		1.16	-0.96	0.313	-1.07	0.897	-0.603	0.803
1.5	-1.72	-0.914	-0.67	0.108	-1.9	0.0445		-0.291	-0.176	-0.625	-1.93	1.89	1.56	-0.534		-0.775	-0.889	-1.33	-2.58	0.568	-0.274	1.08
0.268	-1.91	-1.03	-0.188	-0.663	-3	-0.892		-0.436	0.429	0.243	0.852	0.478	0.106	-0.585		-0.419	0.304	-0.918	-0.556	0.151	0.51	1.5
0.984	-2.39	-0.896	0.207	0.307	-0.678	0.349		-0.346	0.00277	1.39	-0.465	0.979	-0.863	0.158		1.11	-0.435	1.22	-0.467	0.964	0.0609	1.79
1.15	-1.99	0.32	-0.0126	0.655	-1.85	-1.03		-0.227	0.7	1.54	-0.496	1.17	-1.2	1.31		0.476	0.585	1.03	0.35	0.0697	-0.663	2.15
3.79	-0.929	-0.439	-0.0949	0.382	0.197	-2.27		-0.796	0.617	-0.449	-0.667	0.919	-1.78	0.397		-0.0528	1.16	1.96	0.536	0.225	0.609	1.46
5.04	-0.38	-0.92	-0.801	-0.855	0.67	-1.37		-1.83	0.54	0.997	0.328	0.262	-0.526	1.15		0.265	-0.203	-1.68	-0.0692	2.12	-0.988	0.453
4.16	-0.686	0.901	0.684	1.62	-0.532	-0.553		-0.619	0.353	1.26	-0.973	1.44	0.664	2.05		-1.3	-0.077	0.077	0.477	0.488	2.06	0.571
4.26	-0.595	1.16	0.931	0.163	-2.71	-1.33		-1.08	0.653	1.27	-0.494	0.798	-1.33	1.54		-1.71	0.264	1.01	0.892	1.63	0.218	0.627
4.31	-1.31	0.87	0.339	-1.1	-0.93	-0.349		-0.681	0.818	1.24	-0.385	0.726	-1.06	2.6		-2.37	-0.863	-0.947	0.744	-1.59	-0.727	0.516
3.96	-1.11	-0.138	-0.653	0.301	-0.685	-1.52		-1.28	0.884	0.119	0.362	0.52	-2	1.29		-0.492	0.241	1.61	0.489	1.91	-2.87	0.333
4.24	-0.982	-0.406	-1.05	0.644	0.226	-0.745		-0.899	0.579	0.142	-1.1	0.762	-0.083	1.2		-0.509	1.19	0.709	-1.07	2.18	-0.286	-0.394
4.72	-1.35	-1.05	-0.0745	1.72	1.32	-0.871		-1.38	-0.37	0.31	-0.811	-0.481	0.544	1.37		-0.0429	0.81	0.612	1.38	0.441	-0.188	0.0584
4.17	-1.86	1.13	-0.346	1.76	0.573	0.054		-0.437	-1.42	0.765	-0.562	0.316	0.286	1.89		-1.17	0.0746	0.513	-0.394	0.254	0.417	0.467
3.41	-0.937	1.26	0.259	0.0161	1.31	-0.664		-0.947	-0.997	0.582	0.0956	0.547	1	1.57		-0.0838	0.0142	-0.731	-0.332	-0.153	0.938	1.19
3.07	-0.538	1.43	-1.02	1.26	0.307	-1.55		-1.67	-1.52	-0.313	-2.03	1.7	0.175	0.897		-0.269	1.28	0.192	-0.34	0.807	-0.667	0.671
3.93	-1.2	0.0257	0.459	0.931	0.431	-2.54		-0.949	-2.39	0.0321	-2.01	2.66	-0.147	1.45		-0.981	1.14	0.651	-2.26	0.178	-0.00292	1.39
4.53	-0.806	0.124	-0.657	1.78	0.207	-1.34		-0.941	-2.54	-1.37	-1.62	0.317	-0.755	1.22		0.316	0.766	-1.16	0.685	-1.01	-2.32	0.99
4.93	-1.26	1.02	-0.924	1.48	1.44	-0.717		-0.89	-2.77	-2.44	-1.6	0.831	-1.02	1.89		0.674	0.752	-0.715	-0.369	1.53	-0.178	0.776
5.22	-1.35	2.45	1.21	1.05	1.68	-0.743		-1.15	-2	-0.683	-0.8	0.847	-1.17	1.44		1.24	-1.76	0.293	-0.887	3.11	1.37	1.33
4.07	-1.02	1.28	-0.782	-0.0102	0.683	-0.874		-0.931	-3.01	-0.683	0.92	0.321	-1.66	2.27		1.35	-0.649	1.98	-0.65	-1.69	1.13	1.43
4.38	-1.15	1.67	0.592	1.52	0.104	-1.34		-0.729	-2.86	-1.67	-0.791	0.154	-0.241	1.91		0.403	0.656	1.44	-0.722	0.894	0.146	2.5
3.4	-0.932	1.43	0.407	1.56	0.898	-1.07		-0.837	-3.01	-0.974	-2.79	2.04	-0.0276	1.59		0.426	0.367	0.789	-1.27	-1.35	0.387	2.24
3.53	-1.04	1.5	-0.69	0.681	-0.0918	-0.783		-0.758	-2.39	-0.236	-2.07	0.378	-1.26	1.11		0.792	2.29	1.89	-2.22	0.0568	0.801	2.34
1.97	-1.17	1.23	-0.153	0.763	-1.29	-1.96		-0.842	-2.25	-0.547	0.656	0.456	0.298	2.16		1.43	0.729	0.809	1.08	0.999	2.49	1.43
2.64	-1.39	1.53	-2.14	1.8	0.547	-0.682		-1.1	-2.35	2.57	-1.77	1.13	-0.527	1.71		0.0421	1.68	0.934	0.12	1.47	0.0596	0.602
1.95	-2.27	0.689	1.09	1.74	0.786	-1.21		-1.17	-2.25	-0.613	0.699	0.0627	-0.403	1.67		0.0711	1.92	-1.36	0.711	-1.01	-1.11	0.0996
4.43	-2.18	1.65	-0.844	0.936	0.989	-1.13		-0.882	-2.22	-0.543	0.788	-0.884	-0.179	1.38		0.395	-1.57	-1.13	-1.02	1.27	-0.796	-0.239
3.71	-1.16	1.2	-0.431	-0.0074	-1.52	-1.91		-1.16	-1.78	0.836	-0.235	-0.36	1.31	1.93		0.826	1.33	0.45	0.408	2.1	-0.446	1.01
2.52	-0.976	2.5	1.25	-1.55	-0.203	-1.22		-1.58	-1.42	1.43	0.0277	-0.092	-0.0934	1.96		1.39	1.68	1.89	-0.218	2.03	-0.429	1.72
2.86	-1.85	0.964	-0.74	-0.92	-1.57	-2.97		-1.7	-0.995	-0.961	-1.34	-0.275	-0.717	2.86		2.42	0.905	0.614	-0.383	-0.894	-0.372	0.519
1.68	-2.89	1.51	0.105	-0.0555	-0.721	-2.09		-1.37	-1.4	0.559	-0.783	0.746	0.0345	2.32		1.81	1.36	0.572	-1.61	0.351	1.41	-0.0518
2.73	-2.46	0.441	-0.496	-0.9	0.341	-1.89		-0.658	-1.06	-0.157	-0.121	0.732	-0.192	2.32		1.69	0.971	-0.744	-1.13	0.42	0.731	1.12
3.86	-2.07	1.36	-1.15	-0.389	-1.7	-0.267		-1.2	-1.1	-0.172	0.18	0.071	-1.19	2.23		2.11	1.05	0.618	0.346	1.05	0.348	1.03
3.69	-1.86	1.31	0.602	0.867	-1	-2.24		-0.288	-1.52	-1.19	-0.833	-1.27	-0.268	1.76		0.332	1.81	1.36	-0.102	0.457	1.07	0.504
3.86	-1.85	-0.0466	-0.594	-1.52	-1.71	-0.887		-0.0278	-1.47	-1.46	-1.14	-0.603	-1.18	1.48		1.01	-0.714	0.732	0.299	-0.127	-0.81	0.445
1.93	-2.03	0.00052	0.228	-0.568	-1.76	-2.67		0.598	-1.15	-0.406	-0.636	-0.872	-0.394	0.719		1.13	1.04	0.485	0.891	-0.361	-1.21	0.329
-0.401	-2.49	0.285	-0.757	-1.87	-1.11	-2.1		1.17	-1.58	-1.26	0.929	-0.118	1.49	1.08		0.177	0.895	-0.437	0.302	0.756	0.874	-0.0324
0.255	-2.11	1.27	-1.11	0.957	-0.00829	-1.45		1.39	-1.35	-1.96	-1.04	1.67	0.139	1.04		1.5	1.75	-0.139	0.31	2.8	-0.226	-0.805
0.0876	-1.47	0.146	-2.28	-0.401	-0.627	-2.29		0.522	-1.41	-0.384	-2.17	1.55	1.52	1.64		1.22	1.78	0.898	1.78	1.57	-0.794	0.856
1.61	-2.25	0.76	0.0491	-0.721	-1.84	-2.23		1.01	-1.63	0.457	-1.33	0.888	-0.288	1.05		0.903	0.843	0.955	0.51	-0.249	0.243	0.203
1.78	-1.75	0.463	0.365	-0.873	-0.438	-1.39		1.19	-2.3	-0.21	-1.3	0.611	0.114	0.199		0.867	0.605	-0.431	1.67	2.49	0.367	0.604
1.89	-1.47	0.809	-0.59	-1.33	-1.11	-2.09		0.759	-1.94	0.0715	0.465	0.442	-1.05	0.576		1.78	2.79	-0.514	1.57	0.0346	-0.434	0.825
0.53	-2.04	0.491	-0.223	-1.1	-0.515	-2.24		1.35	-2.51	1.17	0.0522	0.238	-0.606	0.0622		1.76	1.92	-0.0245	0.391	1.77	-0.412	-1.43
-0.479	-1.67	-0.458	-1.86	0.216	-0.771	-2.37		0.499	-1.92	-0.133	-1.56	1.81	-0.124	0.839		1.31	2.03	0.282	0.343	0.249	0.592	-0.912
0.445	-1.87	-0.133	-1.38	-0.427	0.318	-1.92		0.698	-2.81	-0.672	-0.232	2.31	0.48	-0.768		0.925	4.06	0.291	0.335	0.561	0.103	-0.411
0.963	-1.51	0.695	-0.558	-1.02	-1.9	-1.69		0.405	-2.04	-1.65	-1.63	0.886	-0.371	-1.67		0.981	-0.502	0.903	-1.49	2.41	1.59	-0.943
1.53	-1.52	-0.187	-0.425	-1.94	-1.33	-2.9		0.457	-2.05	-1.17	-1.14	-0.347	-0.517	-1.74		2.23	1.24	-0.0984	-0.176	2.68	0.498	-0.507
2.43	-2.24	-0.39	0.406	-1.65	-1.17	-0.584		-0.295	-2.63	-0.692	-0.324	-0.713	-0.547	-2.22		1.72	0.825	1.05	0.142	2.25	0.395	-0.393
1.67	-2.58	-0.521	-0.928	-1.12	0.173	-2.24		0.165	-2.04	-0.238	-0.135	-0.399	0.28	-1.24		2.05	1.75	1.27	0.729	-0.248	-0.386	-0.516
2.55	-2.14	0.946	-0.342	-0.574	0.289	-1.51		0.511	-2.4	-1.1	-1.21	0.0921	-0.17	-0.885		1.81	0.0688	-0.0916	0.0568	0.595	0.228	-0.543
1.32	-1.42	0.384	-0.727	-0.703	-0.104	-1.85		1.1	-2.63	-1.38	-1.21	1.4	-1.12	-0.642		1.29	0.0559	0.116	1.68	2.25	-0.211	-1.3
0.762	-1.85	0.401	-1.09	-0.952	-0.879	-2.44		1.9	-2.5	-1.23	-2.09	1.27	-0.0963	-0.479		1.8	0.198	-0.773	-1.81	3.92	0.706	-2.33
2.21	-2.04	-0.625	0.0137	-0.782	0.618	-2.47		1.15	-2.31	-1.18	-2.29	1.6	0.324	-0.395		2.31	1.09	1.82	0.0867	0.899	0.181	-1.22
0.325	-1.71	0.719	-0.173	-1.23	-0.0321	-3.03		1.21	-1.98	-1.57	-1.47	0.947	1.43	-0.264		4.12	0.529	1.41	0.0979	0.177	-0.63	-1.21
0.47	-1.86	1.38	-0.842	0.568	-0.00712	-1.35		1.91	-2.18	0.607	-2.23	-0.546	0.909	-0.0674		3.54	0.206	0.786	-0.411	0.851	0.024	-0.756
1.04	-1.31	-0.466	-0.582	-0.197	-0.333	-2.27		0.972	-2.81	1.27	-1.53	-0.69	0.382	-0.156		3.04	1.93	1.35	0.984	2.18	-0.399	-0.351
1.22	-1.19	0.0411	0.508	-0.0207	-1.78	-2.56		0.986	-1.58	0.926	-2.84	-1.2	0.0411	0.748		2.4	1.12	0.261	0.992	1.31	-0.487	0.33
1.19	-1.29	0.185	0.499	-0.0605	-1.6	-1.73		1.59	-1.81	-1.09	-0.414	-1.23	0.62	1.25		2.87	0.0365	0.931	1.33	-0.427	0.963	0.699
1.02	-1.04	0.0418	-0.431	-0.448	0.164	-2.45		1.63	-2.06	-0.898	-2.22	-0.709	-0.348	-0.206		2.48	-0.644	-0.444	0.305	2.76	2.48	1.26
2.19	-1.17	-0.824	-0.398	-0.721	-0.224	-2.14		0.802	-2.12	-0.107	0.489	-0.888	0.25	-1.69		2.92	0.319	0.594	1.08	1.72	0.0159	-0.0836
1.35	-2.21	1.33	-0.584	-1.06	-0.827	-2.25		0.199	-2.03	-1.05	-1.47	-2.1	-0.636	-1.14		3.47	-0.0708	2.61	2.51	1.56	-0.338	0.127
2.32	-1.6	0.771	-0.241	-0.524	-0.244	-2		1.29	-2.53	-1.24	-2.88	-1.81	0.299	-1.27		2.99	1.46	0.723	0.507	1.99	1.61	-0.576
0.729	-1.71	1.36	-0.511	0.824	-0.807	-1.43		0.658	-2.3	-1.53	-0.872	-1.39	-0.0565	-1.12		3.17	2.31	-1.57	1.63	0.378	3.24	-0.0768
2.03	-1.63	-0.915	0.403	-0.597	-2.12	-2.2		0.804	-2.26	-1.04	-0.461	-0.35	-0.814	-0.0818		3.12	1.65	-1.92	0.614	1.45	1.39	-0.37
2.49	-1.17	0.644	-0.264	-1.85	-2.23	-2.13		0.82	-2.23	-0.337	-0.401	-0.771	-0.242	-0.163		2.92	0.885	-1.25	1.6	1.31	0.213	-0.225
1.43	-1.94	0.883	1.21	-1.29	-2.38	-2.72		0.439	-2.4	0.422	-1.23	-0.135	-1.87	-0.838		3.78	1.38	0.0972	3.18	2.89	1.28	0.51
0.886	-1.85	-1.55	-0.712	-1.77	-1.73	-2.16		-0.412	-1.77	-1.41	-1.17	-1.44	-1	0.131		3.61	0.605	-0.308	1.91	1.03	1.2	0.649
0.56	-2.14	0.526	-0.515	-2.3	-1.62	-0.931		-0.211	-2.03	-0.0152	-0.764	-1.48	-2.66	-0.222		2.34	2.39	1.12	1.52	0.861	2.58	-0.241
1.74	-2.2	-0.645	-0.195	-1.61	-0.486	-1.08		-0.856	-2.34	-0.938	0.853	-2.04	-1.22	0.698		1.84	0.811	0.315	1.28	0.0193	0.23	1.23
1.38	-2.51	-0.172	1.17	-3.42	-0.983	-1.58		-0.205	-2.17	0.325	-0.000118	-1.91	-0.283	-0.288		2.7	0.954	-2.11	0.286	-0.313	0.167	0.361
1.42	-2.15	-1.38	-0.18	-1.05	-1.2	-2.6		-0.685	-1.38	0.886	0.0956	-1.13	-1.33	-0.39		1.98	0.902	-0.62	-1.41	-0.253	0.75	0.144
2.22	-1.72	-1.25	1.12	-1.65	-0.717	-1.24		0.139	-1.54	-0.72	-0.304	-1.31	-1.16	-0.697		2.08	0.18	-0.374	0.668	-0.385	0.221	1.28
2.77	-2.44	-0.117	0.192	-1.92	0.484	-2.11		0.0256	-1.46	-0.775	-0.64	-0.723	-0.778	-0.0593		0.832	0.764	1.39	2.26	2.17	0.838	-0.00838
2.84	-1.98	-0.182	-0.962	-1.22	-1.77	-2.14		0.0182	-2.27	0.341	-1.01	-0.871	-1.78	-0.943		1.06	1.33	0.544	2.04	2.13	0.67	-0.247
2.92	-1.52	1.55	0.305	-0.485	-1.65	-2.22		-0.0466	-1.14	0.945	-1.08	-0.501	-0.987	-0.885		2.13	1.12	-0.152	0.536	-1.1	1.94	-0.985
2.51	-1.79	1.21	-0.685	-1.08	-0.744	-1.88		0.509	-2.11	0.257	-1.37	-0.946	-0.136	0.00217		1.8	0.825	-0.008	2.11	-2.21	1.11	-1.09
1.54	-2.54	0.629	-0.688	-1.18	-0.668	-2.22		1.39	-1.49	1.46	-2.03	-1.53	-1.39	-1.66		2.65	1.59	1.68	1.57	0.762	1.68	-1.26
2.07	-2.56	1.03	0.513	0.896	-2.14	-1.62		0.389	-1.51	0.561	0.7	-1.95	-2.13	-2.41		2.03	1.4	0.543	1.19	-0.0458	0.319	-1.56
1.63	-1.54	0.913	1.1	-0.29	-0.737	-2.53		-0.079	-1.54	0.422	-0.325	-0.0443	-2.36	-1.8		2.18	2.93	-0.199	1.51	0.771	3.63	-1.8
0.437	-2.36	1.18	0.0454	-0.992	-0.54	-2.55		1.56	-1.9	1.69	-1.77	-0.635	-0.536	-0.882		1.39	3.44	-0.83	-0.122	-0.637	1.32	-2.23
0.546	-2.21	0.879	-0.407	-0.341	0.51	-2.81		1.31	-1.72	1.45	0.351	-0.0898	-0.97	-1.9		1.13	3.96	-1.83	1.65	2.63	2	-2.11
0.0657	-2.61	0.162	1.76	0.443	-1.2	-1.46		2.91	-1.62	1.32	-0.913	0.824	0.394	-2.02		1.96	4.16	-0.101	1.08	0.865	1.91	-1.62
-0.413	-2.38	-0.628	0.89	0.211	-0.73	-2.01		4.07	-1.5	-0.199	-0.236	-0.215	0.341	-2.1		1.15	3.95	-0.382	-0.00365	0.554	-0.857	-0.726
-1.83	-2.4	-0.833	1.29	1.99	-0.52	-1.64		4.18	-1.15	-0.431	-0.363	-2.48	-1.19	-1.16		1.4	1.65	-1.11	0.272	0.762	2.58	0.33
-0.0737	-1.89	-0.649	0.86	0.783	-1.25	-2.28		4.93	-0.533	0.0601	-1.19	0.217	-1.06	-1.05		1.89	2.99	-0.903	1.11	1.18	1.74	0.00325
0.208	-2.24	-0.202	1.53	2.18	0.571	-1.77		5.66	-0.0359	1.21	-0.742	0.274	-1.45	-0.722		2.14	2.14	-0.91	0.686	-0.405	0.436	0.534
-0.397	-2.69	0.206	0.316	0.668	-0.4	-1.11		4.83	-0.00653	0.505	-1.28	0.0105	-1.77	-0.0806		1.99	3.2	-0.776	3.37	-2.33	1.92	0.898
0.226	-2.87	1.06	-0.191	1.59	-0.345	-0.598		4.55	-0.163	0.417	0.719	-1.89	-1.29	-0.572		1.23	4.14	0.405	2.71	-2.47	3.21	0.47
0.241	-2.11	0.832	-1.97	1.07	-0.219	-2.03		5.58	-0.3	2.15	0.521	-1.12	-2.66	-0.805		2.24	3.84	1.38	2.28	-1.33	2.69	0.123
-1.67	-1.72	0.206	1.35	0.87	-1.16	-2.27		4.93	-1.16	2.47	-0.435	-1.3	-0.455	-0.905		1.89	3.28	-1.08	0.929	-2.62	3.55	-0.482
-1.72	-2.22	2.4	-0.354	1.27	-1.82	-2.18		5.7	-0.926	-0.0902	-1.18	-1.12	-2.88	-1.95		2.53	4.45	0.574	3.07	-3.06	2.42	-0.916
-0.724	-2.3	2.23	0.47	1.81	-0.591	-0.371		5.89	-0.97	1.68	-1.59	-0.708	-1.05	-1.74		2.08	3.29	-1.1	3.88	-1.57	3.04	-1.4
-0.126	-2.46	2.99	1.03	0.834	0.357	0.0311		6.26	-0.967	1.05	-1.05	-2.49	-2.49	-0.3		2.45	3.75	0.353	3.88	0.37	3.21	-1.15
0.619	-1.99	1.21	1.94	1.82	-0.38	-0.211		5.94	-0.904	1.15	-0.855	-2.02	-1.33	-0.561		3.36	4.25	0.565	3.93	-2.31	4.3	-1.26
0.483	-2.29	1.64	0.194	0.579	-0.0744	-1.22		6.9	-2.1	2.12	-0.932	-0.76	-0.998	-1.05		3	4.05	-1.51	2.3	-2.07	3.28	-0.531
-0.0843	-2.46	-0.0817	0.0982	1.99	1.06	-0.221		6.62	-2.42	1.74	-0.792	-1.46	-0.0793	0.366		4.5	3.91	-0.137	2.86	0.777	3.93	-1.15
-0.505	-1.64	1.45	0.391	1.79	-0.0369	-0.204		6.88	-2.25	2.71	-0.0385	0.00979	0.0884	0.927		4.66	3.54	0.674	1.79	2.47	3.34	-0.561
-0.588	-1.91	1.61	1.86	1.51	-0.708	0.932		6.3	-1.38	2.96	0.159	-0.988	-0.749	-0.0445		4.82	2.69	0.532	1.47	1.11	3.54	-0.219
0.0503	-0.422	2.46	1.42	0.859	0.931	1.16		6.46	-1.73	4.57	0.458	-1.73	0.449	0.562		6.17	3.13	-0.453	2.49	1.93	0.799	1.25
-0.32	0.348	2.91	2.27	1.04	1.76	0.668		6.64	-0.33	1.46	1.05	-1.54	0.199	0.0845		7.44	3.71	-0.926	3.71	3.26	-0.735	0.825
0.803	0.919	1.91	0.152	0.667	1.26	1.15		7.29	-0.446	3.51	-0.0706	-0.00993	-0.952	0.157		6.01	4.49	0.981	3.26	4.14	0.783	0.894
-0.465	2.07	2.24	1.24	1.99	1.85	2.73		7.82	0.756	3.59	1.62	-0.466	0.376	0.28		5.03	4.51	2.38	2.79	1.34	2.72	-0.321
-0.000172	2.43	4	2.07	2.52	2.69	2.61		6.73	1.2	5.87	1.04	-0.163	0.878	0.00457		5.26	5.54	-0.0584	1.18	2.05	2.98	-0.544
-0.00372	1.45	4.04	1.43	1.94	2.62	2.16		6.49	1.35	5.26	-0.176	-1.4	1.27	-0.342		6.85	4.15	1.28	3.05	4.11	3.8	0.937
0.512	-0.727	4.91	3.35	2.06	1.5	2.53		6.63	2.6	5.23	2.25	-1.09	0.0051	-0.153		6.8	2.61	0.119	5.42	3.23	4.16	1.22
0.74	-0.254	5.5	3.26	2.29	1.97	2.59		5.27	2.64	5.79	0.765	-1.37	1.73	-0.857		5.63	4.22	0.833	4.49	5.19	3.38	-0.146
0.981	-1.62	4.92	1.83	1.96	2.56	3.4		5.03	1.4	3.88	3.77	0.107	0.29	-0.745		4.56	3.61	2.41	5.82	2.6	3.8	0.705
0.724	-0.143	5.03	3.51	2.93	3.45	0.0374		7.03	-0.125	6.07	0.369	-0.451	0.914	-0.823		4.15	4.15	2.74	3.63	5.12	3.55	0.763
1.27	-1.13	5.01	3.1	1.63	3.48	1.52		5.86	-0.647	4.49	2.56	1.15	3.03	-1.43		4.37	2.77	0.518	2.52	4.59	2.84	1.05
0.457	-0.379	4.16	3.7	1.83	1.82	1.96		5.78	-0.571	5.7	0.808	1.06	2.32	-1.4		4.34	4.46	2.86	2.25	5.4	3.21	2.11
0.31	-0.133	5.31	1.51	3.08	3.88	0.72		5.35	-1.33	4.77	1.19	-0.566	2.3	-1.09		4.48	3.95	5	3.71	3.38	2.4	1.4
0.692	0.749	5.07	3.3	3.76	2.41	0.677		5.67	-0.605	5.84	1.61	0.0553	4.56	-1.3		4	4.38	5.61	3.35	4.05	3.09	1.67
2.36	0.137	5.74	4.01	1.37	3.45	1.67		5.04	0.571	6.03	1.54	0.0636	0.94	0.0727		4.3	4.89	4.95	5.13	5.6	4.77	2.26
1.53	0.303	5.78	2.64	2.09	3.69	0.949		5.67	0.343	4.94	1.39	-0.121	1.78	0.407		4.81	4.27	7.66	3.24	5.09	1.93	1.64
2.11	0.456	4.57	2.73	0.299	3.21	2.08		5.09	0.818	5.17	1.36	-0.255	1.6	-0.455		3.73	5.25	4.88	4.87	5.3	3	0.693
0.234	0.171	3.47	3.31	2.8	4.19	2.54		4.84	0.482	4.41	0.644	-1.12	3.03	0.294		5.53	4.14	3.77	4.92	5.14	2.48	1.51
0.881	1.42	4.53	2.36	1.19	2.49	1.41		3.71	0.35	5.15	-0.246	0.499	2.17	1.07		5.16	2.72	6.59	4.28	3.75	3.1	2.37
-0.234	0.823	4.49	2.64	0.816	4.04	1.74		4.89	0.376	5.04	2.13	1.15	1.62	1.15		5.55	3.18	5	3.11	4.91	1.93	2.15
0.514	1.28	1.84	2.19	0.323	3.72	2.17		6.13	0.538	3.27	1.16	1.82	1.16	0.747		5.13	4.65	3.66	4.5	3.19	3.75	1.01
0.695	0.878	2.85	3.2	1.01	2.69	2		5.32	1.11	2.78	0.708	0.443	-0.155	0.426		5.03	4.72	3.84	5.62	4.09	3.31	1.19
1.79	1.02	1.92	1.62	2.81	4.02	1.63		5.27	1.35	4.05	1.67	0.668	1.8	0.702		5.53	2.85	7.1	4.47	4.76	3.46	0.429
2.61	1.08	2.95	3.67	3	3.54	2.12		4.94	1.01	4.46	1.71	1.2	1.72	-0.0429		4.5	3.95	5.93	3.29	4.07	3.36	1.55
0.582	1.33	2.44	0.966	2.64	3.69	0.93		6.19	1.3	3.6	0.975	1.02	1.5	0.467		3.8	6.14	4.06	5.28	4.32	2.49	1.56
0.537	0.898	1.05	1.84	2.83	1.64	0.264		5.5	1.08	5.38	2.18	2.1	2.81	0.26		4.2	5.69	4.67	4.39	5.75	2.84	1.87
1.74	0.116	1.69	4.06	2.46	2.57	1.22		5.6	1.12	4.96	0.797	2.39	1.42	-0.464		4.39	4.97	4.04	3.88	4.64	4.13	2.36
1.44	1.3	0.4	3.92	1.62	3.13	2.23		4.63	1.48	4.55	0.636	1.33	1.84	1.01		5.59	4.52	6.89	4.89	5.13	4	2.43
0.306	0.58	1.71	3.51	2.39	3.75	1.43		5.2	1.16	3.23	-0.012	2.94	0.837	0.479		5.02	3.72	5.3	4.94	4.9	3.25	2.37
-1.22	0.977	-0.576	2.88	1.37	1.68	1.29		5.11	1.7	5.04	1.75	2.13	2.13	1.35		4.67	5.37	5.43	4.1	4.55	2.78	1.67
-0.502	0.266	1.73	2	1.56	1.71	1.75		4.64	2.04	5.52	0.467	1.58	0.605	0.928		4.64	4.36	5.95	3.72	3.69	2.66	3.34
-0.759	1.26	2.16	1.84	4.28	2.06	1.86		5.12	1.6	3.64	2.01	2.45	2.14	-0.23		4.74	4.9	5.88	3.9	5.61	2.58	3.65
-0.685	1.18	3.93	2.31	3.39	0.871	0.637		5.29	1.76	3.66	3.35	3.47	1.73	-0.268		3.95	4.61	4.94	3.37	7.96	4.63	4.61
-1.5	1.5	0.824	3.93	2.34	2.3	1.19		4.8	1.87	4.6	1.74	4.51	1.94	-0.462		5.13	5.52	4.5	3.6	7.67	4.3	4.09
-0.934	1.05	1.76	5.94	2.55	2.68	1.87		5.01	1.62	4.39	1.48	2	2.42	0.535		3.92	3.87	3.85	4.68	8.98	2.92	3.83
-1.25	1.04	1.65	2.87	0.631	3.14	0.75		4.28	1.76	4.29	1.4	1.36	0.95	0.605		4.5	4.15	5.01	3.75	10.3	2.65	3.49
-1.72	1.31	0.59	2.49	1.42	2.93	1.79		4.63	1.5	3.96	0.76	3.99	1.64	0.241		4.16	3.67	3.97	3.84	7.15	4.01	3.58
-1.16	1.86	2.59	2.88	2.31	2.82	1.3		3.92	1.68	5.7	2.11	3.62	0.046	-0.0671		3.99	4.21	3.87	3.85	7.6	5.08	3.47
-0.836	1.43	2.87	3.6	1.55	2.16	2.16		3.25	1.49	5.37	1.27	2.59	1.1	0.156		5.12	5.12	6.14	3.48	8.72	4.71	2.86
-0.368	1.52	2.4	4.98	3.36	1.52	2.28		4.24	1.22	7.27	1.61	1.4	0.441	-0.109		4.49	5.51	4.43	3.2	8.27	4.25	3.48
0.742	1.61	2.06	4.1	2.7	2.33	1.56		4.42	1.73	4.8	1.85	1.77	2.14	0.649		4.54	5.26	5.76	2.55	8.45	6.45	4.02
1.25	1.4	1.39	3.82	2.12	1.65	0.715		4.48	1.72	4.17	2.19	1.61	0.168	0.644		3.19	4.76	5.39	4.09	7.43	5.38	4.28
0.682	1.06	1.98	3.19	2.53	0.596	-0.0267		4.43	1.41	2.6	1.83	3.17	0.798	0.464		3.09	4.35	8.31	3.73	10.2	5.78	4.69
0.375	1.14	1.83	4.2	2.14	1.31	1.09		3.91	1.58	4.63	1.86	2.96	-0.97	0.717		2.34	4.69	4.88	2.46	8.8	5.26	4.57
0.183	1.39	1.63	3.35	3.13	2.33	0.499		3.99	1.88	4.71	2.26	1.73	1.99	0.626		2.44	5.08	6.13	2.16	8.11	4.09	4.15
0.207	0.883	1.38	4.59	3.28	3.72	0.811		3.91	2.15	4.47	-0.49	1.78	1.95	-0.309		4.45	3.44	4.55	2.94	6.64	4.21	4.15
-0.00963	1.27	2.31	3.89	2.53	2.61	0.857		4.87	1.64	4.31	1.37	2.25	1.45	0.35		4.43	3.51	5.55	3.49	8.72	5.73	5.13
1.23	1.13	2.63	2.45	1.92	1.75	1.43		4.47	1.57	2.74	2.25	1.44	0.929	-0.0711		4.47	3.28	5.38	3.18	8.38	4.01	6.55
0.88	1.16	2.17	4.3	1.01	2.36	1.47		4.8	1.75	3.12	2.41	1.37	0.388	-0.0104		4.72	3.29	5.65	2.94	7.81	4.5	6.41
0.215	1.39	2.62	1.53	3.57	2.37	-0.547		4.51	2.11	2.06	1.21	3	-0.0579	1.13		4.16	3.99	5.69	3.28	7.1	2.47	5.57
-0.763	1.37	2.72	2.5	2.96	1.95	0.181		4.49	2.05	3.64	1.48	3.81	1.07	1.15		3.12	4.48	5.28	4.39	7.65	4.3	5.11
-0.797	1.8	2	1.12	2.57	1.84	0.00983		5.71	1.66	2.67	2.79	4.05	0.746	1.96		2.91	3.64	5.98	2.6	6.9	3.98	4.58
-0.144	2.08	1.47	1.73	2.3	3.11	0.951		5.38	1.84	1.72	1.9	3.85	-0.416	0.957		3.38	3.24	5.55	3.83	9.89	2.77	4.31
0.528	1.68	2.81	3.89	1.97	0.312	1.49		4.53	1.83	3.56	3.19	4.1	0.162	1.85		3.67	4	5.2	4.43	7.72	4.94	4.22
-0.499	0.869	4.19	4.56	2.56	2	-0.416		4.57	2.08	3.99	1.81	4.5	-1.26	0.783		3.16	4.76	7.13	3.6	7.29	4.78	2.8
0.598	1.56	1.97	3.16	2.36	1.65	0.399		5.44	1.76	4.26	3.43	5.09	0.94	0.584		2.31	5.91	5.8	4.1	10.1	6.75	3.18
0.845	1.61	2.95	2.58	2.69	1.65	0.405		5.18	2.09	4.78	1.07	3.45	1.45	-0.18		2.83	3.03	7.24	4.24	9.23	4.35	4.39
-0.126	1.47	2.08	2.63	2.63	1.04	0.9		6.52	2.32	3.96	3.35	3.14	0.335	0.301		2.64	5.47	4.29	3.22	7.79	2.63	3.8
0.452	1.84	2.78	4.22	2.31	2.77	0.978		6.01	2.08	5.37	1.22	3.89	0.633	-0.356		3.44	6.35	6.35	3.62	7.45	5.52	4.28
0.116	2.14	3.79	2.23	2.88	3	0.323		6.34	1.99	4.01	4.18	4.5	0.669	-0.0532		4.6	4.06	6.56	3.86	8.05	3.23	6.58
0.33	2.02	2.23	4.58	2.52	2.46	0.781		6.42	2.33	3.75	2.73	3.58	1.35	0.936		3.62	4.14	5.85	3.99	7.62	3.84	6.83
0.42	1.58	2.22	3.7	2.14	3.01	-0.13		6.17	2.7	4.1	0.391	2.62	0.802	0.786		3.93	3.75	5.79	2.87	9.7	3.08	6.19
-0.26	1.77	2.21	2.99	0.836	1.7	1.04		6.17	2.16	4.41	1.75	1.8	0.703	0.0122		2.92	4.4	5.52	5.37	9.06	2.09	6.03
-0.403	2.03	2.55	3.58	2.44	2.82	-0.323		6.42	1.69	5.72	1.13	2.48	0.47	1.61		3.33	4.71	6.62	2.78	8.83	4	6.76
-0.656	1.4	4.56	2.67	0.902	1.68	0.995		6.45	1.97	3.05	1.43	2.84	1.83	1.59		3.44	4.6	5.17	3.29	9.81	4.34	5.98
-1.05	2.05	4.28	3.01	0.935	1.6	-0.313		7.37	1.91	3.91	3.23	3.09	0.571	0.89		2.11	3.35	4.98	3.38	6.86	5.89	4.9
-1.53	2.23	4.07	2.61	1.3	2.57	-0.0311		6.77	1.83	3.23	2.9	2.68	0.702	0.418		3.15	3.56	6.17	2.87	8.93	3.99	3.89
-0.901	1.35	3.45	3.9	2.81	2.08	-0.289		6.46	2.19	3.81	2.43	3.26	0.571	0.277		2.99	4.32	6.24	3.13	8.25	5.68	4.27
-1.9	1.51	3.65	1.24	3.37	0.947	0.331		6.39	1.8	3.85	3.33	2.58	0.988	1.32		3.67	3.69	6.9	3.68	8.69	4.2	3.7
-1.54	1.79	3.69	2.03	2.13	1.6	0.534		6.55	1.73	4.87	2.75	1.65	1.38	2.04		3.65	3.93	5.9	3.71	12.1	6.98	3.53
-0.968	1.73	3.51	-7.61	1.85	2.07	0.878		7.36	2.25	3.87	1.63	3.37	0.556	2.92		4.71	2.85	6.09	2.04	9.01	3.96	3.29
-1.43	1.57	4.07	5.47	2.23	2.37	0.157		7.17	1.51	2.56	2.06	3.77	2.36	2.42		2.99	2.77	7.14	4.02	10.5	4.62	3.26
-0.332	1.52	5.17	2.21	1.94	1.35	0.206		6.57	1.59	2.15	0.627	4.36	0.0146	3.31		3.24	3.73	9.12	4.28	8.37	5.09	3.24
-0.0273	1.15	3.08	2.94	1.23	1.61	0.178		5.73	1.93	2.91	0.152	4.68	-0.669	2.33		4.05	3.28	5.59	2.71	10.7	3.45	3.3
0.9	1.05	3.24	3.31	3.35	2.66	0.489		5.47	1.93	1.8	1.44	3.05	1.34	2.89		3.67	4.21	8.02	4.21	7.99	4.53	3.8
1.22	1.31	1.22	3.49	1.27	2.09	1.36		4.35	1.87	1.78	1.82	3.49	0.808	2.84		3.12	3.28	5.9	3.31	9.58	3.2	3.28
2.12	1.26	4.09	3.39	3.14	2.05	1.29		5.08	2.05	4.21	1.66	3.17	1.8	2.8		3.01	4.27	7.72	4.16	8.39	3.8	2.56
3.26	1.54	3.34	4.24	2.5	2.92	0.971		5.1	1.24	3.23	0.613	3.75	1.03	2.26		3.03	4.03	6.08	4.23	9.62	4.32	2.21
2.69	1.83	4.54	4.89	2.25	3.16	1.91		5.85	2.11	5.04	1.52	3.07	0.115	3.04		4.2	3.36	7	3.96	9.38	4.3	2.23
2.71	1.54	4.28	1.79	2.27	2.91	2.25		5.84	2.46	3.89	1.24	4	0.478	2.7		3.42	4.35	6.06	4.32	9.07	2.98	2.87
3.2	2.16	3.52	4.48	3.17	2.57	1.58		5.54	1.93	4.31	0.974	4.38	2.15	2.71		3.56	2.99	6.45	3.83	5.83	6.15	3.53
3.18	2.33	2.64	3.03	1.41	3.63	0.923		4.36	2.04	2.45	1.65	3.85	1.5	2.65		2.4	2.7	5.38	3.88	8.52	3.55	3.24
2.77	1.63	2.84	3.08	3.28	4.1	0.559		4.33	1.39	3	2.98	2.89	2.06	3.02		3.34	3.63	5.36	3.59	8.55	3.83	2.6
2.49	1.92	2.76	4.17	2.14	3.42	-0.172		4.16	1.51	3.83	-0.463	4.03	2.79	3.27		3.17	4.58	6.31	2.38	9.11	3.45	2.2
1.82	1.92	3.6	4.43	3.2	2.83	0.873		4.28	1.75	3.96	1.04	3.57	2.88	1.85		3.19	4.17	3.46	3.79	9.08	5.66	2.56
2.04	1.46	3.03	4.37	3.19	1.52	0.267		4.06	1.92	4.96	1.83	3.08	1.51	2.31		3.31	4.13	3.99	3.14	10.9	5.85	2.77
1.94	1.88	4.65	4.05	2.41	2.98	-0.308		3.7	1.7	4.46	-0.0269	3.63	2.48	2.17		3.38	3.61	5.04	5.17	10.1	6.77	1.35
1.94	1.26	3.1	5.09	2.39	1.97	1.01		3.58	2.1	4.15	0.654	3.77	2.06	2.79		3.64	1.54	6.27	5.07	8.54	5.28	1.34
1.69	2.01	3.34	4.4	2.59	2.19	1.05		3.24	2.13	3.89	1.51	5.27	2.13	2.72		3.91	4.17	6.03	3.18	10.1	6.34	1.04
1.01	1.53	3.28	3.34	1.18	3.15	0.167		3.93	1.78	0.949	2.78	4.62	3.58	2.26		3.96	2.73	4.77	4.81	10.9	6.17	1.32
0.804	0.723	2.47	4.61	2.63	3.92	-0.0622		4.01	2.64	4.19	0.783	4.02	1.42	2.6		2.98	4.44	5.97	2.46	7.24	5.72	1.71
1.36	1.87	2.69	2.7	2.12	3.71	0.284		2.65	2.03	3.76	3.34	4.28	1.68	2.63		2.61	4.69	7.05	3.9	10.3	5.91	0.968
0.975	1.81	2.04	4.97	2.1	2.02	0.203		2.28	2.27	2.51	2.49	4.73	2.47	2.22		3	3.93	6.4	4.19	8.27	6.75	1.58
0.933	1.57	2.86	4.65	2.49	2.18	-0.713		2.74	2.33	4.01	1.97	3.83	4.06	2.42		2.68	4.22	5.54	4.78	10.2	7.05	1.48
0.775	1.95	1.78	4.84	2.73	2.95	-0.378		4.15	2.75	4.79	1.19	3.3	5.58	3.14		1.8	4.59	6.1	4.06	8.1	5.21	1.47
0.7	1.85	4.77	6.06	2.95	1.78	0.0981		3.24	2.88	2.56	1.42	3.43	5.55	3.08		2.59	5.18	7.22	5.34	10.6	7.44	1.82
0.501	1.62	3.15	2.92	1.46	2.23	-0.11		2.41	2.64	3.42	1.87	5.02	5.22	3		3.37	4.57	7.1	5.62	10.1	6.88	2.48
0.251	2.66	2.57	5.17	1	2.27	0.341		2.65	1.58	2.33	1.77	4.17	2.7	3.44		3.11	5.55	5.79	6.11	7.27	7.37	1.8
1.15	2.21	3.22	5.26	1.65	2.3	-0.00843		3.11	1.59	5.53	2.31	3.66	3.72	3.16		2.79	5.51	6.76	2.63	9.78	4.55	1.76
1.24	2.19	3.83	3.92	2.42	2.78	-0.661		3.43	2.31	3.42	1	3.57	4.51	3.33		3.79	5.81	6.75	4.64	8.98	7.06	1.71
1.42	1.99	2.41	3.01	3.04	2.47	-0.446		2.73	1.94	4.15	2.73	3.64	4.92	3.14		4.64	5.6	5.37	3.29	8.45	4.73	3.11
1.55	1.15	3.18	2.42	3.41	3.2	-0.969		2.51	2.25	4.81	2.92	2.84	6.07	2.46		3.95	4.79	5.66	5.02	8.83	6.11	3.04
0.576	1.96	3.23	3.38	1.21	2.75	-0.386		2.67	2.37	5.75	0.874	3.67	4.28	2.79		4.46	4.29	5.37	5.29	8.4	5.95	3.93
0.69	2.15	3.52	1.93	1.75	2.14	0.0285		2.5	1.97	5.88	-0.176	2.11	5.94	2.93		2.74	5.38	5.66	3.1	8.94	7.6	2.82
0.599	1.96	2.02	2.8	0.954	2.3	0.0465		2.85	2.54	4.59	0.183	2.55	5.79	3.61		3.91	4.31	5.35	2.64	7.83	6.81	2.79
0.72	1.48	3.27	3.14	1.84	2.91	0.511		2.27	2.42	4.9	1.38	3.61	5.27	3.39		3.48	3.79	7.46	2.86	8.25	7	3.08
0.572	2.37	2.13	2.24	2.74	1.16	0.298		3.12	2.74	3.94	0.424	2.65	5.73	3.28		3.39	3.56	5.7	2.82	11.3	7.72	2.99
-0.975	1.51	2.76	3.18	3.23	1.72	-0.897		3.8	2.36	3.26	2.06	4.4	7.2	3.53		4.1	5.89	6.14	4.15	7.65	5.76	4.23
0.637	2.08	1.82	2.21	1.92	3.16	-1.07		2.41	2.35	4.1	2.35	5.08	5.88	3.8		4.03	3.81	7.3	4.44	10.1	6.12	3.44
1.29	2.09	3.19	2.53	2.1	1.92	0.206		3.52	2.75	5.23	0.943	5.15	4.51	3.14		3.36	5.76	4.32	4.39	9.62	6.81	3.13
1.81	1.28	2.42	3.99	2.38	3	-0.26		2.98	2.36	6.35	4.02	5.06	3.37	2.47		3.52	5.94	5.13	5.02	7.86	4.18	3.85
1.95	1.79	2.24	3.16	2.24	2.32	-1.34		3.48	2	5.5	2.49	5	3.3	3.1		3.4	3.98	5.92	4.85	8.73	6.4	2.65
1.5	1.82	1.53	4.62	2.04	2.64	-1.15		3.78	2.67	5.27	2.15	4.69	4.51	2.91		4.18	6.07	5.8	5.19	10.3	5.11	3.05
1.33	1.98	1.36	4.47	1.82	1.98	-1.74		3.78	2.23	6.61	-0.131	3.83	3.15	2.74		4.51	5.4	6.94	4.66	9.83	7.64	3.35
2.33	1.55	3.63	2.6	3.51	3.24	-0.094		4.24	1.87	3.25	2.6	4.44	4.86	1.48		4.86	3.79	7.75	4.01	7.49	7	3.59
3.67	1.89	2.49	1.81	3.51	3.02	0.0667		5.11	2.42	2.69	2.6	2.9	4.55	1.14		3.96	6.74	6.2	3.6	8.1	5.68	3.92
4.79	1.24	3.65	2.55	2.72	2.93	-0.0834		5.39	2.32	5.45	1.54	3.86	5.16	1.45		3.59	4.42	8.17	5.65	8.81	4.11	3.8
5.85	1.11	3.14	2.6	3.65	0.863	-0.114		4.34	2.17	4.48	3.49	2.22	4.7	1.35		2.83	5.36	8.35	3.11	9.84	7.67	4.35
5.68	0.602	2.93	2.97	3.1	2.1	-0.507		5.32	1.92	2.98	0.918	1.83	5.19	2.01		4.3	5.64	7.32	3.69	10.7	5.72	3.91
4.61	1.21	2.75	3.6	5.14	1.1	0.406		5.39	2.49	4.02	1.58	1.5	7.26	2.98		3.69	6.07	6.7	3.39	8.13	5.59	3.08
4.23	1.18	2.71	1.9	3.59	1.25	-0.143		5.2	1.74	4.58	2.08	2.25	5.7	2.72		2.55	5.86	6.22	5.5	10.5	6.03	3.11
3.84	1.42	1.91	2.46	3.48	2.02	-0.508		3.91	2.98	4.44	3.37	2.58	4.39	2.5		3.24	5.48	8.84	5.06	9.04	5.54	2.89
4.08	1.16	3.1	4.89	4.42	2.71	0.284		4.22	2.19	5.52	2.03	2.6	4.72	3.11		2.28	5.76	6.97	4.08	9.76	7.15	3.73
2.91	1.66	2.28	2.76	3.82	3.25	-1.67		4.88	1.74	4.13	2.1	3.06	4.64	2.07		1.97	5.68	6.44	3.52	9.46	7.18	3
4.46	1.97	2.08	3.01	2.19	2.35	0.0305		4.85	1.98	4.6	0.643	1.73	4.02	2.15		2.73	4.82	8.74	4.61	8.29	4.48	2.28
3.18	1.5	1.44	2.23	3.48	3.59	-0.491		4.31	2.96	5.28	0.242	0.545	3.9	1.52		3.38	4.79	7.36	4.09	8.93	4.84	3.68
4.62	1.14	2.69	3.62	2.74	2.35	-0.795		4.54	1.68	6.05	-0.0619	2.2	3.42	1.61		4.16	6.76	7.35	3.88	10.8	5.12	2.91
4.51	1.38	2.25	2.38	2.08	0.664	-0.047		4.23	2.27	4.66	2.28	1.98	4.26	1.98		4.3	7	6.25	4.74	11	6.22	3.42
5.52	1.62	2.27	2.31	1.9	0.153	-0.247		4.32	2.45	2.71	1.58	2.62	4.93	2.88		3.51	6.15	7.3	3.54	9.59	4.29	4.2
4.62	1.96	0.846	3.36	3.15	0.872	-0.0338		4.7	2.19	4.74	2.27	2.65	5.6	2.72		3.69	5.32	6.3	4.48	9.85	6.91	4.17
5.22	2.03	2.41	4.87	3.23	0.953	0.7		4	2.28	4.94	1.31	2.57	4.55	1.89		3.43	5.22	6.81	3.8	9.6	6.99	3.16
3.88	1.99	1.66	3.42	3.39	1.59	0.681		4.42	1.91	5.65	2.86	2.39	6.05	1.74		3.97	5.76	8.36	4.14	8	5.42	2.86
3.48	1.5	3.53	1.95	2.82	1.94	0.557		4.37	2.18	6.74	2.14	2.06	4.85	1.89		3.13	5.07	9.25	4.72	8.85	6.17	2.83
4.4	1.91	4.08	4.22	3.56	2.42	-1.47		3.67	2.22	4.89	0.47	3.52	5.16	2.87		3.41	6.3	8.21	3.45	8.52	6.36	2.75
3.46	2	3.09	3.65	4.79	0.999	-1.06		4.06	1.55	3.35	0.952	3.3	4.43	1.97		2.83	5.13	8.33	3.33	10.5	6.47	3.06
2.27	1.5	2.79	2.59	1.93	3.23	0.636		4.17	1.27	4.94	1.83	3.06	4.6	1.96		3.16	6.44	7.06	2.69	9.67	6.05	2.75
2.51	1.02	2.48	2.63	3.36	2.82	0.0232		4.33	0.892	4.25	2.33	3.85	5.14	1.75		2.28	4.64	7.52	3.14	10.4	3.83	3.15
3.12	1.3	2.46	4.12	1.56	2.11	-1.28		4.08	2.36	4.89	4.03	4.71	5.64	1.44		1.48	5.23	6.9	4.29	8.44	6.72	3.71
2.66	1.54	3.61	3.05	3.08	1.85	-1.47		4.28	1.9	5.22	2.25	3.22	4.98	2.09		2.3	5.51	8.3	1.64	10.2	5.24	2.41
2.36	1.16	2.21	2.7	3.11	1.24	0.0641		3.42	1.97	6.51	2.64	3.77	4.98	1.11		2.88	5.19	8.22	5.38	8.37	6.62	3.8
3.22	0.884	2.82	3.27	1.93	2.13	1.42		3.72	1.82	5	2.13	4.81	4.58	1.45		2.78	5.07	6.13	6.58	11	5.86	3.68
2.51	1.24	3.46	1.4	3.27	1.01	1.62		3.87	1.9	6.83	2.35	3.93	5.52	1.77		2.43	4.82	6.92	4.19	10.3	5.69	3.49
2.18	1.01	2.08	1.39	2.23	1.53	0.559		3.79	2.52	6.11	4.29	4.85	6.16	2.27		2.88	6.2	7.09	4.42	11	6.72	3.87
2.35	1.35	1.6	4.08	1.99	0.793	1.71		3.52	2.37	5.79	3.65	4.82	7.54	2.26		2.34	6.02	7.12	4.45	11.8	7.42	3.52
2.66	1.58	0.766	2.73	3.23	1.53	1.07		2.41	1.73	6.86	3.07	3.74	5.58	1.88		2.48	6.56	5.83	4.24	8.47	5.44	3.29
2.18	2.28	2.58	2.87	2.96	0.795	1.4		2.97	2.11	6.75	3.09	4.13	4.57	2.39		2.11	5.17	6.41	5.9	9.09	8.15	2.87
1.4	1.05	3.3	3.25	2.65	1.41	0.748		2.72	1.67	4.4	3.34	4.07	2.42	3.09		2.2	6.86	6.88	3.9	8.08	7.28	3.79
2.08	1.71	1.98	2.41	3.28	1.36	2.03		2.21	1.63	7.12	3.29	3.48	6.99	2.79		3.2	6.74	7.15	4.54	10.4	5.34	3.61
1.77	2.33	2.77	3.08	2.14	1.03	1.07		3.15	1.79	5.5	2.15	5	5.45	3.14		2.27	6.47	8.24	5.64	10.8	6.99	4.36
0.769	1.65	2.88	2.58	2.65	-0.00313	-0.483		2.45	1.45	3.69	2.65	4.68	7.33	2.87		3.12	5.78	7.69	3.36	10.5	5.73	4.35
0.982	2.26	3.15	-0.0246	1.4	1.9	0.677		2.68	1.6	6.64	2.66	3.63	6.13	3.2		2.82	4.72	8.47	5.88	10.4	5.68	5.45
0.312	1.7	2.45	3.43	2.18	3.04	-0.362		3.01	1.9	4.03	1.49	4.78	6.28	2.98		2.54	5.82	6.88	3.86	10.7	7.13	5.53
1.01	2.12	3	2.03	1.06	2.56	1.01		2.24	1.52	6.6	2.74	3.97	5.48	3.23		2.93	5.02	7.15	4.04	9.95	7.44	4
0.26	1.41	1.65	2.28	2.37	2.91	0.636		2.6	2.03	6.53	2.29	4.68	6.06	2.12		2.29	6.87	7.75	4.62	10.1	6.78	3.58
1.07	2.44	3.45	2.86	2.11	3.67	-0.00771		2.12	1.02	5.4	3.1	4.87	6.66	2.84		2.91	6.83	8.6	4.79	10.5	4.88	4.98
-0.0681	1.97	2.44	3.06	3.43	3.17	-2.08		1.66	1.51	6.04	1.32	5.06	6.25	2.76		2.57	5.9	6.88	6.23	9.94	5.31	4.64
-0.124	1.74	2.31	3.85	2.61	2.25	-0.423		1.69	1.84	4.3	1.14	3.01	7.6	3.8		2.68	5.82	9.09	4.68	10.5	7.4	4.99
-0.199	2.1	1.41	4.05	1.27	1.57	1.39		1.81	1.9	5.08	2.4	5.03	6.45	2.75		2.86	7.19	6.36	3.91	8.34	7.76	4.89
-0.867	1.97	1.52	3.89	2.41	2.34	0.0303		2.12	1.71	5.77	3.07	4.51	6.43	3.14		1.74	5.44	8.34	0.658	9.02	7.19	3.35
-1.65	1.71	3.21	1.42	3.81	2.32	1.04		1.2	1.78	3.61	2.69	4.12	5.94	3.23		2.95	4.67	6.93	4.88	9.43	6.24	4.24
-1.09	1.45	2.86	2.31	2.88	2.88	1.51		1.62	0.89	4.41	3.06	3.43	5.32	3.37		2.88	5.2	8	4.71	8.6	6.68	3.72
-0.118	1.63	2.03	1.5	2.83	4.41	-0.714		2.23	1.07	4.53	0.67	3.88	6.8	1.88		3.52	5.98	5.82	4.19	10	6.19	3.63
1.48	1.81	2.41	2.4	2.89	1.94	0.589		2.43	1.46	5.86	3.05	3.99	5.62	2.94		2.54	6.07	8.33	6.19	9.62	6.36	4.5
-0.282	2.01	3.03	2.93	3.53	2.8	0.602		1.95	1.33	6.41	3.54	4.7	5.22	2.28		2.25	5.1	8.59	3.43	9.64	6.46	4.73
1.88	1.1	2.68	3.11	1.88	1.03	0.821		1.58	1.82	5.37	2.08	5.19	7.73	3.18		1.79	6	8.63	5.85	10.3	6.48	4.97
1.69	0.631	3.66	1.36	0.0174	0.626	1.42		1.03	1.1	5.59	2.63	4.64	7.55	2.39		3.21	5.79	7.97	4.12	12.4	5.17	5.35
1.34	1.48	2.88	2.42	2.88	2.77	0.917		0.961	1.28	5.41	2.45	4.86	7.5	1.4		2.64	6.1	8.82	5.39	10.5	6.25	5.39
0.687	0.719	1.79	3.51	1.79	3.21	1.64		0.199	1.48	4.76	4.04	4.16	5.27	1.66		2.68	6.94	7.55	5.74	9.76	6.79	5.76
0.609	1.31	2.85	2.42	1.75	2.33	0.0516		-0.126	1.72	6.01	1.85	3.38	6.23	1.56		2.94	6.88	9.25	3.59	10.7	5.01	4.53
1.19	1.92	1.29	2.63	2.54	2.4	-0.408		0.799	2.1	5.72	2.75	4.52	7.46	2.08		1.99	5.74	7.83	3.77	9.28	7.43	4.42
0.726	1.26	3.17	1.31	1.41	2.1	-0.424		0.529	2.06	5.16	1.97	3.87	8.37	3.16		1.13	5.02	7.3	3.65	9.94	5.91	5.1
-0.755	2.06	3.1	2.53	2.49	3.04	1.25		0.685	1.77	3.88	1.17	4.74	9.03	2.85		2.68	5.24	6.33	3.96	9.43	4.59	4.42
0.182	1.5	2.83	4.62	2.24	1.02	0.324		0.0038	1.83	5.34	2.75	4.6	9.34	2.54		2.07	4.57	7.61	4.19	10.1	4.94	5.25
-0.532	1.97	2.11	3.85	2.17	1.95	1.08		0.159	1.91	3.79	0.859	4.18	6.84	2.57		2.27	5.01	9.01	5.33	10	4.73	4.16
-0.553	1.17	2.05	2.23	1.76	3.82	0.462		-0.281	1.58	4.2	1.67	3.65	5.82	2.53		2.31	5.7	8.81	3.9	8.58	5.9	3.43
0.236	1.23	2.17	3.57	2.57	3.06	0.663		0.683	1.16	4.11	1.27	4.14	8.33	2.65		3.64	5.62	7.11	6.24	11.9	7.75	3.71
0.847	1.7	1.44	3.27	3.78	2.12	-0.171		0.942	0.945	3.25	1.52	4.72	6.4	3.11		2.77	4.05	6.27	6.49	8.76	6.1	5.29
0.942	1.77	2.64	3.71	1.22	2.31	-0.787		0.595	1.16	4.43	1.96	4.1	6	3.41		2.59	4.52	8.49	4.42	8.26	6.57	5.41
-0.508	0.849	1.71	3.98	0.713	3.44	-1.13		0.0169	1.55	4.44	1.59	5.14	7.14	3.94		1.73	5.28	7.99	5.25	9.25	6.19	4.87
-0.831	1.33	-0.385	2.76	2.32	1.54	-0.575		1.11	1.79	5.81	1.52	4.68	9.1	3.41		2.6	5.39	10.1	4.67	10	6.16	5.8
-1.79	1.36	1.05	3.86	1.75	2.26	-0.959		-0.0164	0.811	5.87	1.92	5.08	6.6	3.28		3.08	4.23	9.78	6.16	10.9	6.4	5.41
-2.78	1.74	-0.102	3.33	2.66	1.73	-0.517		-0.037	1.48	5.29	1.32	4.54	6.41	3.15		3.05	6.19	9.39	7.17	8.57	7.44	6.61
-2.6	1.31	3.02	1.8	2.09	2.82	-0.729		-0.322	1.41	4.8	0.698	4.05	6.39	4.19		2.34	5.2	8.24	5.74	10.7	8.01	6.47
-2.69	1.31	3.85	4.12	1.32	3.56	0.313		-0.0316	1.37	3.92	1.21	4.73	6.45	3.19		2.71	4.46	10.3	5.27	11.4	9.67	6.53
-2.12	0.769	3.06	2.74	2	2.66	-0.816		-0.201	1.23	6.1	0.874	4.55	5.82	3.51		2.36	4.54	7.66	3.12	9.98	5.62	6.85
-1.33	0.881	2.5	3.64	3.35	2	0.0117		-0.0739	1.19	3.46	-0.0391	3.76	8.19	2.88		2.6	6.05	6.98	4.17	9.81	6.58	7.07
-1.62	1.38	2.45	3.42	1.88	2.81	0.0325		-0.552	1.41	4.18	0.127	5.1	6.72	3.79		2.87	5.71	8.52	4.31	8.94	6.51	4.54
-1.25	0.991	1.21	2.13	4.3	2.11	-0.537		0.0917	1.79	3.09	-0.363	3.01	7.26	3.17		3.78	4.5	7.78	6.09	9.56	7.94	4.03
-1.65	1.11	0.923	2.2	3.13	3.61	-0.433		-0.065	1.36	3.69	0.0507	4.1	7.84	2.57		3.36	4.57	9.85	4.32	12.2	5.91	4.17
-0.193	1.14	3.41	3.87	1.87	2.93	0.172		-0.291	1.42	4.13	2.22	3.55	7.37	3.28		3.37	4.68	10.7	6.75	8.41	7.28	4.58
-2.14	1.07	1.87	2.66	2.92	3.18	0.395		1.78	1.59	5.17	-0.991	4.6	7.97	3.43		4.72	3.23	9.03	2.75	10.2	6.33	3.53
-0.533	2.17	3.78	2.27	3.72	3.56	-0.725		1.93	1.49	5.22	1.25	3.56	8.29	3.12		4.31	3.1	10.1	5.42	9.41	6.29	4.45
-2.1	1.19	2.78	1.85	2.27	2.35	-0.271		1.1	0.729	5.37	1.05	4.3	7.09	3.31		3.26	4.16	7.39	5.2	9.69	6.8	3.62
-0.934	1.92	2.61	3.38	3.84	2.78	-0.259		1.62	1.4	5.68	1.39	4.76	7.74	3.55		3.61	6.7	8.96	4.12	10.3	6.39	4.47
-2.42	2.09	2.82	4.38	3.13	2.54	-0.953		1.34	1.05	4.42	2.68	3.32	7.38	3.99		2.74	6.15	8.74	5.79	9.17	6.42	4.74
-1.82	2.01	2.48	1.57	3.06	1.96	0.202		2.43	0.697	3.96	0.58	4.28	9.91	3.36		2.33	3.89	8.57	4.27	9.84	7.33	4.01
-1.72	1.72	3.17	0.761	0.683	1.26	-0.308		2.17	1.45	3.7	3.37	3.15	8.87	3.6		2.42	4.44	5.82	5.44	9.24	6.39	5.86
-1.78	1.73	3.44	1.61	2.83	2.07	-1.17		2.25	1.96	5.03	0.83	3.15	9.5	3.68		2.56	4.98	7.35	4.78	8.38	7.26	5.38
-0.837	2	1.95	1.36	1.48	1.29	-0.508		2.94	2.21	5.91	1.56	3.25	8.25	2.76		2.19	4.63	7.7	4.63	9.67	6.48	5.46
-0.427	1.76	3.79	2.43	1.79	0.415	-0.107		2.79	2.24	6.33	1.73	3.42	9.7	3.51		1.83	4.25	7.29	4.25	9.35	5.8	6.29
-1.28	1.52	1.36	3.7	1.37	2.45	-1.58		2.88	1.99	3.12	-0.212	3.31	9.2	3.13		2.2	3.45	6.3	3.36	10.2	8.51	5.54
0.493	1.18	2.74	4.44	1.35	2.66	-0.156		1.68	2	4.27	2.53	3.66	9.49	3.34		2.36	3.57	9.75	4.86	8.54	5.7	6.98
0.395	1.19	1.78	3.57	1.78	2.03	-1.51		2.51	1.5	5.63	0.596	4.85	8.52	2.7		1.74	4.88	8.16	6.4	7.55	5.82	7.06
-0.426	1.13	2.03	2.68	1.5	0.591	-1.28		2.19	1.86	5.29	1.01	3.86	9.6	3.16		1.95	3.25	10.9	5.08	8.56	7.59	6.83
-0.188	1.69	1.57	2.13	-0.0344	1.51	-0.908		3.69	2.27	4.9	0.512	3.87	8.13	3.09		1.58	2.72	9.7	5.32	8.26	6.66	5.21
-0.195	1.67	2.11	0.802	0.932	-0.492	-0.297		2.43	2.66	6.1	3.9	2.98	7.64	3.29		1.71	2.13	8.54	6.02	10.7	6.15	6.3
-0.876	1.93	1.29	3.02	1.08	-0.622	0.0338		3.19	2.26	4.82	2.73	4.67	10.2	2.69		2.59	5.29	8.89	3.09	10	6.81	5.51
-1.59	2.37	2.55	4.01	1.04	0.577	0.0548		3.72	2.06	3.21	-0.335	3.78	7.71	2.61		2.79	4.47	9.83	5.12	10.3	7.81	5.93
-0.151	2.19	2.29	3.78	2.58	1.72	1.2		3.1	2.6	4.28	-0.166	3.34	8.46	3.02		3.02	4.76	8.95	5.39	9.59	6.18	5.16
-2.02	2.08	2.65	3.24	2.47	-0.163	-0.278		3.11	1.88	4.09	0.271	3.26	9.17	3.04		2.92	4.28	9.02	6.21	9.14	6.71	5.12
-1.67	1.46	2.7	3.69	2.1	0.54	-0.443		3.58	2.54	4.44	0.649	4.42	8.46	2.88		3.64	2.34	8.97	5.51	7.87	6.92	5.72
-0.456	1.55	2.42	2.17	0.883	1.37	0.0193		3.28	2.12	5.76	0.4	3.72	9.01	1.63		2.91	2.46	9.52	6.38	8.85	6.62	5.41
-0.581	1.64	1.51	2.95	1.32	1.63	1.04		3.75	2.11	3.38	1.71	3.6	9.96	2.25		2.91	3.59	8.59	3.9	6.44	5.37	4.79
-0.456	1.62	1.69	2.43	0.602	1.41	0.0465		3.46	2.49	3.31	1.3	2.19	9.37	3.26		2.78	2.41	8.33	4.65	12.1	7.93	3.87
0.226	2.13	3.31	2.44	0.464	-0.823	0.68		3.29	2.24	5.41	1.32	2.7	9.14	3.83		2.52	4.17	8.81	5.08	11.8	7.99	4.34
0.337	2.07	2.69	4.23	0.921	-0.381	-0.447		3.12	2.69	5.73	1.53	3.23	10.6	3.98		1.73	4.14	9.52	5.21	11.2	7.29	4.68
-0.311	2.35	2.99	2.57	0.83	-0.682	-0.261		2.74	2.2	5.24	-0.586	4.25	9.8	3.74		3.49	3.74	8.47	5.54	10.6	6.13	4.14
-0.432	1.66	3.09	3.21	0.386	0.6	0.51		2.86	2.46	5.34	0.733	6.05	8.61	2.9		3.72	3.84	8.88	4.58	8.29	6.96	4.57
0.0509	1.39	3.68	0.417	2.2	0.461	0.672		3.46	2.22	2.56	0.67	4.48	7.62	3.07		3.1	3.6	8.31	4.7	8.52	8.64	4.99
0.372	2.21	3.14	3.17	2.28	0.537	1.15		2.55	2.33	5.2	1.98	4.42	8.74	2.15		2.87	2.02	11.2	4.68	10.5	7.25	5.07
-1.17	2.1	3.05	1.51	0.471	1.54	0.636		2.03	2.51	3.44	1.11	3.6	10.1	2.35		2.88	3.01	9.91	5.73	8.9	8	5.48
-1.23	1.91	2.57	3.61	0.434	0.61	-1.3		2.72	2.71	4.45	1.27	2.9	9.78	3.16		3.34	2.56	11.3	6.43	13.3	7.2	5.99
-0.693	1.03	3.14	0.0767	-0.0442	-1.12	-0.729		2.77	2.83	4.94	0.697	3.11	8.48	2.47		2.48	2.71	9.76	7.58	12.9	7.94	5.87
0.771	1.4	2.65	0.747	-0.0459	1.1	-1.42		2.09	2.12	5.43	1.17	3.48	8.82	2.65		3.34	3.52	11.9	5.6	9.26	7.17	6.59
0.927	1.21	1.18	2.25	0.471	1.16	-1.75		1.67	2.44	5.54	0.658	3.82	8.58	2.89		3.76	2.66	8.78	7.2	9	8.54	6.94
0.709	1.47	1.94	0.423	0.375	0.532	-0.891		1.68	2.56	5.71	-0.0886	2.48	8.73	2.3		3.47	3.3	11.6	5.69	9.71	7.96	6.43
0.274	1.5	3.31	0.155	0.325	-0.0894	-1.16		1.6	2.38	4.33	-0.126	4.04	10.2	2.06		3.05	2.95	11.3	4.87	9.21	8.75	6.55
0.358	1.04	2.15	3.05	0.755	0.229	-1.6		2.68	2.02	5.27	-0.579	3.63	10.2	2.92		3.59	2.64	9.65	5.59	11.2	7.81	5.45
-0.564	1.81	2.78	3.36	0.868	1.15	-1.89		1.62	2	3.03	0.947	3.42	9.43	2.76		3.43	3.73	10.3	7.45	13.1	7.69	4.76
-1.21	1.4	3.3	1.26	0.77	0.723	-1.19		2.22	2.01	4.83	1.28	2.22	8.7	3.01		2.13	3.57	11.5	5.97	10.7	7.86	4.16
-0.782	1.9	2.68	1.11	0.598	-0.101	-1.4		3.64	2.66	5.31	-1.05	2.7	9.17	2.58		2.84	1.34	7.91	5.86	11.8	7.48	4.08
1.19	1.48	2.88	1.84	1.86	1.26	-1.17		3.84	1.55	4.61	0.273	3.25	10.8	2.64		2.64	4.03	8.21	6.69	10.2	7.84	4.23
0.238	1.08	2.45	2.26	0.994	0.0221	-1.73		3.83	2.39	4.04	-0.318	4.26	8.08	1.94		3.37	1.91	11.5	5.36	10.1	7.93	3.33
-0.467	1.03	2.35	2.98	0.857	1.38	-1.41		4.06	5.61	3.13	0.706	2.6	9.64	2.43		2.53	2.72	8.65	5.57	11	8.28	3.15
0.464	1.31	2.87	0.814	0.39	0.981	-3.06		4.05	5.18	4.47	0.925	3.96	8.23	2		2.9	1.7	10.3	5.84	11.4	9.14	3.7
0.964	1.68	2.49	1.47	1.06	0.808	-1.8		4.21	1.3	4.54	-0.841	3.34	7.69	1.61		2.49	3.84	10.1	6.19	7.97	8.02	4.91
1.17	0.768	3.5	1.64	1.12	0.685	-2.27		3.49	2.14	5.52	-0.207	2.65	7.16	2		3.57	4.02	10.3	6.95	9.86	8	5.37
0.663	1.03	2.34	1.32	1.5	0.587	-1.96		3.14	2.21	4.42	0.632	2.99	8.59	2.44		3.1	4.42	9.62	6.84	9.55	7.7	5.51
0.285	1.84	2.73	1.79	0.657	-0.156	-2.2		3.23	1.87	4.2	0.166	3.24	7.56	3.14		3.37	3.87	9.42	5.17	10.7	6.49	4.97
1.93	1.47	4.03	2.37	2.06	-0.0486	-1.77		3.2	1.91	5.33	-0.434	2.92	8.8	3.4		1.99	3.46	10.4	6.44	9.08	7.75	5.81
1.06	1.55	3.04	2.01	3.16	0.966	-1.52		2.5	2.1	2.73	0.928	3.38	9.65	3.82		2.44	4.24	9.02	6.48	10.9	8.79	5.5
0.156	1.06	4.29	0.859	0.355	1.6	-1.62		3.52	2.01	3.22	-1.76	2.42	8.17	4.07		2.64	4.02	9.92	4.26	10.7	7.4	5.05
0.913	1.83	3.42	0.759	2.29	0.908	-2		3.39	1.84	4.09	1.52	4.6	9.4	4.51		2.75	2.28	9.78	5.67	10.7	7.32	6.04
1.57	1.51	0.558	0.635	1.58	-0.662	-2		3.08	1.27	3.61	1.27	3.53	7.98	3.91		2.56	3.2	8.33	5.29	8.75	9.88	6
1.64	1.32	2.66	2.98	0.557	0.229	-2.97		2.69	1.62	4.45	1.03	3.32	8.62	2.76		1.66	2.82	9.94	7.25	9.37	8.47	5.42
1.87	0.895	1.74	-0.139	-0.0105	0.545	-3.25		2.84	1.52	3.1	1.68	4.21	7.65	2.6		2.18	3.5	11.2	7.41	9.19	8.54	6.28
1.68	1.02	3.47	3.48	2.21	-1.16	-3.51		3.31	1.99	2.7	1.34	3.58	6.82	2.03		1.97	3.93	9.76	7.19	8.62	6.4	6
2.22	1.8	4.13	3.22	0.224	0.674	-1.85		2.37	1.83	2.87	0.651	3.62	7.73	1.52		2.58	3.11	9.25	5.08	10.3	5.96	5.65
2.02	1.32	4.81	3.21	1.29	0.216	-1.86		2.09	1.19	4.24	1.17	3.6	6.43	2.26		2.91	3.12	11.1	5.03	8.58	7.16	5.18
0.884	1.29	4.24	1.04	1.56	0.0735	-2.13		2.41	2.05	3.17	2.47	4.38	7.05	2.69		3.4	2.59	12	6.27	10	7.68	4.89
1.08	1.38	3.77	2.13	1.29	1.85	-1.91		3.07	1.5	3.74	2.3	3.22	8.01	2.3		2.87	2.67	10.3	6.1	9.46	8.26	5.09
0.332	1.49	3.94	2.58	1.43	1.31	-1.03		3.33	1.2	3.5	1.83	1.69	6.61	1.78		2.34	2.96	10.7	6.13	8.38	8.63	5.54
0.621	2.23	3.11	1.83	2.33	0.0799	0.281		2.79	1.09	5.33	1.65	2.25	6.97	1.74		2.8	3.24	10.5	5.29	8.13	6.22	6.15
0.00667	1.37	2.62	1.78	1.32	-0.684	-1.99		2.74	2.3	4.36	2.02	3.27	6.58	1.98		3.04	3.5	11.5	5.21	7.47	6.44	5.37
0.658	1.23	2.69	1.53	2.01	0.508	-0.79		2.29	1.95	3.05	0.93	4.87	5.5	2.57		1.53	4.49	8.92	4.97	9.14	7.33	5.82
0.53	1.66	2.33	2.32	1.46	0.401	-1.84		1.84	1.7	3.88	1.64	2.53	5.28	4.24		2.61	2.98	10.7	4.55	10.1	6.95	5.03
1.78	1.51	4.18	2.93	1.31	0.719	-3.13		2.36	1.57	4.74	2.11	1.62	7.22	3.9		2.19	5.02	9.98	5.91	7.75	8.21	6.45
1.1	1.33	2.99	2.65	1.04	0.309	-2.42		1.74	2.03	2.85	2.17	2.32	6.31	3.94		2.88	3.41	9.66	5.15	11.7	6.36	6.2
0.156	2.16	2.04	2.76	0.612	-1.13	-2.06		2.16	1.45	3.21	1.89	1.47	5.1	3.96		2.29	2.32	9.16	5.88	8.31	7.59	6.52
-0.311	2.23	3	2.36	0.304	0.266	-2.28		2.52	2.07	4.54	-0.0909	0.68	5.44	4.35		2.07	2.98	9.92	5.77	8.47	7.68	6.42
0.912	1.44	2.15	2.07	-0.0089	0.221	-3.21		2.9	2.07	5.65	1.23	1.04	6.07	4.48		2.01	2.87	9.49	5.55	6.55	7.5	5.6
0.652	1.02	1.17	3.02	0.477	1.2	-2.53		2.13	2.19	5.32	1.32	1.74	5.97	4.73		2.59	2.99	10.9	5.04	8.21	8.46	5.88
0.16	2.25	2.98	2.51	1.38	-0.824	-2.64		2.81	1.43	3.55	3.33	3.58	6.53	4.19		1.92	4.05	12	4.94	8.17	7.71	5.63
-0.612	1.86	1.69	1.49	2.19	0.3	-2.98		3.22	0.84	2.58	1.67	1.97	6.31	5.33		2.63	3.85	9.55	5.38	7.65	6.52	5.54
0.265	1.54	1.87	0.342	1.89	1.33	-3.42		2.85	1.38	4.15	0.882	2.43	7.44	4.67		1.55	2.56	11	5.22	5.73	6.35	5.6
-0.0777	2.21	1.62	1.52	2.55	1.04	-2.59		3.55	1.55	1.89	1.26	2.45	5.42	5.62		2.55	2.04	9.15	4.97	6.47	7.71	4.81
0.454	1.56	2.29	2.97	0.91	0.131	-2.86		3.07	1.52	2.69	1.19	1.8	6.38	4.97		2.2	0.23	11.4	4.28	7.88	6.46	5.44
0.517	1.27	1.74	0.884	1.56	0.116	-2.44		3.59	1.68	3.6	2.65	2.82	6.95	5.1		1.68	3.03	10.4	3.99	3.78	6.58	6.02
1	1.17	1.73	3.55	0.273	-0.218	-1.36		3.43	1.69	3.43	0.1	2.6	7.44	4.96		2.38	2.21	11	5	6.91	3.83	6.52
-0.0215	1.4	0.512	0.65	1.67	0.431	-2.93		3.38	1.56	4.12	1.33	2.51	7.58	5.38		2.2	3.37	9.96	4.56	5.3	5.35	6.23
-0.488	1.7	0.925	0.833	1	1.37	-2.47		3.93	1.37	4.46	-0.289	2.07	7.4	5.69		2.57	1.1	9.79	4.47	3.69	6.16	5.37
-0.532	2.01	1.95	0.674	2.03	0.82	-3.08		4.49	1.2	1.83	0.935	2.18	7.22	5.88		1.91	2.27	11.3	4.47	4.59	6.65	6.43
0.0185	1.81	3.56	0.555	0.905	2.43	-3.52		4.43	1.96	4.18	0.613	3.39	8.03	5.12		1.6	2.14	10.3	3.65	6.63	5.23	6.91
-0.155	1.01	3.22	1.12	1.03	1.09	-2.18		4.28	1.55	4.42	-0.074	3.58	7.99	4.63		0.577	1.91	11.3	4.81	6.25	5.88	6.21
2.4	1.65	1.67	1.67	1.32	0.393	-2.21		3.8	1.14	4.27	0.988	2.11	7.74	4.87		1.56	0.928	9.56	3.94	8.03	5.95	6.22
2.84	0.562	2.71	0.637	1.28	0.597	-1.56		4.58	1.29	4.48	1.21	2.13	7.09	5.02		1.76	2.07	10.6	5.02	7.89	4.86	6.67
3.86	1.44	3.84	1.07	2.06	0.206	-2.52		4.73	1.26	4.6	0.0237	2.37	6.59	4.86		2.2	1.18	10.1	4.87	4.67	5.43	7
3.01	1.68	2.46	2.26	1.59	-0.337	-3.73		4.92	1.59	4.1	-1.21	1.56	7.98	5.25		1.65	3.7	9.76	6.51	5.54	7.09	5.48
3.53	0.94	1.28	1.33	0.136	0.0228	-3.98		5.39	1.73	5.99	-3.67	1.81	7.3	3.65		1.7	4.92	9.78	3.78	5.83	5.61	5.63
3.42	1.44	2.07	0.0338	2.63	0.813	-2.22		4.3	1.71	5.21	-0.0455	2.94	6.21	4.92		1.61	3.08	10.6	4.51	3.74	6.64	6.51
2.21	1.22	4.29	1.8	1.64	-0.55	-1.85		5.03	2.1	2.54	-0.396	2.91	6.99	5.29		1.9	1.21	11.2	6.12	7.56	4.3	5.93
2.31	0.66	0.916	0.959	1.5	-0.0405	-1.75		4.91	1.27	3.67	-0.038	1.38	7.48	5.08		1.32	1.63	10.6	4.8	5.77	5.71	5.44
2.08	1.06	2.95	0.325	2.48	-0.223	-1.39		4.61	1.72	3.05	1.71	0.797	6.64	4.48		1.65	3.97	10.6	3.84	6.81	6.31	6.15
2.49	1.19	2.18	2.22	1.52	1.88	-2.14		4.21	1.95	3.68	0.819	3.44	6.91	4.91		1.5	2.34	9.58	4.72	5.08	5.9	6.72
2.47	0.991	1.99	1.18	0.93	2.36	-2.35		4.48	1.56	4.25	-1.1	3.62	6.92	4.04		2.08	1.66	11.7	5.57	4.75	4.64	7.07
2.61	0.685	2.5	2.33	1.31	1.17	-1.61		3.77	1.37	4.53	1.22	2.03	6.3	4.06		2.11	2.81	13.8	5.93	3.91	4.88	7.54
2.16	0.698	1.9	1	0.944	0.497	-1.92		3.05	1.24	3.89	0.148	2.48	8.03	4.07		1.87	2.66	11.8	4.18	5.38	3.43	6.61
2.62	1.36	1.87	1.82	0.913	1.44	-2.87		2.26	1.43	2.86	-1.19	1.94	8.62	6.17		2.53	3.59	10.9	3.71	4.41	6.65	7.15
1.72	1.07	0.892	1.02	1.15	0.723	-2.42		1.93	1.64	3.35	-0.437	2.16	6.24	2.88		3.1	2.51	12.3	4.6	6.95	6.01	7.83
2.11	1.42	1.56	1.03	2.24	0.151	-1.9		1.07	0.99	4.01	1.5	2.12	5.89	4.38		3.75	4.46	10.2	4.97	5.9	4.01	7.39
0.75	0.697	1.69	1.58	2.15	0.425	-2.83		0.00844	1.17	4.68	1.85	2.09	8.13	3.33		4.25	4.52	9.98	5.55	5.15	4.3	7.76
0.361	1.35	3.09	0.0982	1.27	1.4	-2.2		0.964	1.3	4.08	0.867	2.53	6.88	2.94		4.38	3.6	10.9	4.85	6.49	3.63	7.25
0.0234	1.13	1.23	1.61	1.2	1.34	-1.33		2.33	0.513	3.48	0.58	2.02	6.53	3.01		3.74	4.38	12	5.37	5.34	6.93	6.91
0.427	0.801	1.11	1.06	1.09	0.0885	-2.1		0.948	0.625	5.16	0.144	2.61	5.79	3.6		3.94	4.27	9.85	4.54	5.24	5.47	6.97
1.52	1.01	1.74	-1.32	0.296	0.722	-2.2		2.22	0.202	3.69	-0.945	1.87	6.39	3.94		4.09	4.7	11.9	4.96	5.84	5.69	7.41
1.1	0.626	1.6	1.42	-0.112	0.163	-2.09		2.42	-0.104	3.68	0.317	1.35	6.94	3.54		3.81	4.12	10.9	3.3	5.84	6.01	6.96
0.992	0.944	2.37	-0.345	0.665	-0.422	-1.35		1.61	-0.269	4.55	1.01	1.31	6.23	3.41		3.47	2.88	9.4	5.11	4.27	5.1	6.98
0.256	0.553	0.522	0.205	0.137	1.22	-1.54		1.96	-0.0164	3.12	0.74	2.32	6.84	3.41		2.14	2.61	10.3	4.64	4.52	5.45	6.14
1.03	1.19	2.16	-0.14	2.61	0.958	-2.74		2.25	0.836	5.05	2.17	1.57	6.62	4.19		3.55	2.92	12.1	6.28	4.45	5.2	5.86
0.787	1.01	1.73	0.384	1.71	1.47	-3.92		2.56	-0.056	1.86	-0.137	2.35	7.28	3.71		2.67	1.8	12.3	6.18	4.06	5.9	6.74
1.84	1.2	1.48	0.0246	1.45	2.19	-1.92		2.31	0.0346	3.24	-1.16	1.53	6.19	4.19		2.43	2.52	11.4	3.8	4.24	4.07	5.07
1.56	0.399	1.41	1.62	1.45	0.808	-1.36		2.57	0.493	2.35	-0.925	2.02	6.71	4.43		2.49	2.54	12	3.7	6.92	5.4	4.79
2.63	0.987	1.51	0.555	0.704	1.81	-1.8		1.44	0.175	3.7	0.571	3.41	6.55	3.48		2.63	4.19	11.3	3.9	7.14	6.2	5.98
0.72	0.585	1.72	3.01	1.78	1.55	-2.27		1.56	-0.494	4.53	-1.61	1.74	7.05	3.23		2.34	4.05	11.1	4.96	6.85	5.84	7.49
-0.536	1.08	1.13	0.352	1.47	0.116	-2.47		1.24	0.0308	4.59	0.233	0.976	7.69	2.25		2.22	4.37	11.2	5.22	6.64	5.58	6.28
-0.6	0.317	2.32	2.23	-0.557	1.42	-2.34		2.04	-0.234	3.05	-0.108	2.66	7.64	2.72		2.14	3.3	10.1	4.88	4.65	5.11	5.64
0.645	1.43	1.8	1.38	1.45	3.3	-1.78		1.08	0.279	2.58	-0.177	1.57	6.97	2.88		2.64	3.79	11.3	4.53	4.96	5.69	5.56
1.81	0.625	1.01	2.11	0.727	2.44	-1.44		1.35	-0.837	3.31	-0.118	2.07	7.88	2.13		2.7	3.82	10.8	6.09	2.98	5.56	5.81
1.97	-0.0369	1.27	0.254	-0.827	2.53	-1.48		0.971	-0.779	3.39	-1.9	2.43	6.96	3.08		2.16	3.44	11.2	4.19	3.47	5.5	5.73
2.41	-0.0354	1.13	1.67	1.34	2.49	-1.81		2.29	0.325	3.95	-1.1	2.99	4.98	3.07		0.516	2.73	9.28	3.84	4.11	3.45	5.93
0.861	0.305	0.863	-0.0787	1.31	1.55	-2.65		0.343	0.511	3.01	-0.0109	2.02	5.89	1.83		1.34	3.18	10.7	4.26	5.18	5.68	5.99
-0.502	0.978	1.5	1.24	-1.14	2.49	-1.17		0.642	0.71	5.19	-1.35	2.05	5.5	2.69		0.883	3.83	10.1	3.85	4.58	4.88	6.13
0.166	1.88	1.25	1.13	-0.354	1.33	-1.91		1.05	0.895	4.61	-0.343	1.91	6.56	2.46		0.487	3.47	10.8	4.81	5.15	2.72	7.27
1.67	0.792	1.08	1.34	0.249	1.49	-2.83		1.09	0.227	3.11	-0.459	1.84	6.93	2.33		0.592	2.31	8.9	4.51	5.11	5.06	6.67
1.38	0.502	2.48	1.13	-0.985	1.04	-2.04		0.872	-0.177	4.19	1.93	3.34	6.55	1.97		0.933	3.13	9.63	6.53	4.51	3.46	6.82
1.12	0.388	0.711	1.37	0.0412	1.84	-2.08		1.47	0.674	4.36	1.25	3.29	6.21	1.8		1.56	2.66	10.7	3.85	4.43	4.78	7.37
-0.651	0.15	1.14	-0.0542	-0.719	1.43	-1.72		0.477	0.666	2.84	1.57	2.82	5.03	1.8		1.33	1.05	11.7	4.48	3.86	6.25	6.48
-0.748	1.09	2.94	1.54	0.703	1.22	-1.83		0.912	0.726	3.97	1.75	2.68	5.7	2.06		1.01	3.17	10.8	3.6	3.07	5.54	6.19
-0.205	1.88	1.8	0.468	-0.239	2.59	-3.13		1.49	0.451	3.35	0.719	1.84	5.93	1.6		1.56	4.71	10.2	3.79	3.05	4.76	5.78
0.631	1.38	2.1	0.435	-0.713	0.445	-1.38		1.19	-0.0939	3.69	-0.607	2.77	6.82	2.94		1.02	2.43	8.48	5.56	3.43	4.7	4.59
0.854	2.03	2.21	1.45	-1.42	3.15	-1.89		1.63	0.173	3.52	0.176	3.1	6.61	2.21		0.351	2.8	11.7	3.65	4.19	4.73	4.4
-0.555	0.925	2.55	0.608	-0.0437	2.05	-1.72		1.44	0.776	2.93	-0.23	2.8	7.51	2.44		0.374	2.74	11.7	5.17	4.55	3.94	4.98
0.215	1.39	2.32	1.02	-1.16	2.8	-1.91		1.83	1.53	4.66	-0.367	1.42	4.78	2.24		1.55	2.98	10.2	5.82	3.28	4.41	5.23
0.827	1.32	1.03	-0.648	-1.43	2.12	-2.86		1.69	0.692	5.69	-0.384	3.01	6.16	2.37		0.466	1.8	10.3	4.56	4.86	3.34	6.32
0.934	0.971	0.733	-0.51	0.141	0.448	-2.13		1.19	0.607	5.52	-0.854	2.36	4.46	2.57		-1.15	2.36	10.2	3.77	2.6	4.22	6.39
1.16	1.36	1.3	-0.26	-1.13	1.23	-1.33		1.26	0.445	5.57	-0.138	3.01	4.84	2.24		0.209	2.63	9.85	3.38	3.98	4.05	5.59
-0.719	1.37	2.61	-0.166	-0.773	2.5	-3.11		0.802	0.231	4.83	-0.592	3.22	4.74	3.15		0.816	2.82	9.77	2.09	4.85	5.36	5.98
-1.42	0.931	1.81	-0.0876	-1.67	2.31	-1.72		0.906	-0.0957	4.95	0.965	2.41	5.53	3.81		-0.0219	3.68	10.7	1.57	4.81	3.47	6.62
-0.831	1.92	1.21	-0.13	1.37	1.6	-3.03		0.856	0.246	5.22	1.68	2.37	4.88	3.2		1.26	5.08	8.85	2.76	5.62	4.41	7.64
0.164	1.32	1.69	2.63	-0.583	1.79	-3.55		1.6	-0.149	4.52	0.231	2.46	2.97	2.94		1.44	4.89	11.3	3.24	3.6	5.73	6.69
-0.00988	0.738	0.942	1.2	-0.807	1.08	-3.22		2.06	0.395	4.53	-0.7	1.55	5.68	2.94		2.4	2.82	10.7	5.49	4.06	3.95	6.2
-0.344	0.801	3.11	1.59	0.744	0.673	-3.48		2.28	0.111	6.01	0.575	1.97	5.25	2.29		1.98	2.15	10.5	4.87	4.95	6.32	7.24
-0.877	1.77	3.1	-0.306	-0.0102	2.11	-2.91		2.95	0.275	5.81	-0.619	2.07	5.44	2.53		1.01	1.21	11.7	4.09	5.47	3.9	6.25
-0.887	0.931	2.44	0.858	0.213	4.66	-1.93		2.4	0.11	3.63	0.226	3.18	4.09	3.58		1.56	2.81	11.1	5.29	5.06	4.45	6.59
1.69	1.86	1.5	0.0461	-0.028	2.73	-1.59		2.21	0.0955	3.15	-0.362	1.92	5.55	3.1		1.8	3.45	10.2	6.52	4.86	4.01	6.25
2.37	2.51	2.2	0.404	0.585	0.994	-3.5		2.33	0.286	3.79	-0.581	1.32	3.64	3.83		0.765	3.78	12.4	3.48	2.18	5.21	5.46
3.01	2.7	0.773	0.0542	-0.461	2.13	-2.52		2.77	-0.326	5.48	0.757	1.11	4.37	3.72		-0.165	1.98	9.85	5.12	4.36	3.55	5.04
2.46	2.28	1.35	2.09	-0.00774	1.48	-1.98		1.7	-0.372	4.3	1.24	2.04	5.95	4.83		-0.358	3.88	9.33	4.24	2.52	3.59	5.48
1.6	1.49	1.12	0.925	-0.0418	2.39	-1.88		1.36	-0.00607	4.07	1.32	3.27	5.85	4.8		-0.21	2.44	10.7	5.01	2.96	4.91	4.35
1.24	1.21	2.07	2.1	0.56	2.63	-2.16		1.06	0.32	5.47	0.862	2	5.75	5.64		-0.585	2.28	8.85	5.14	2.82	4.83	5.08
0.884	1.63	1.88	1.85	-0.738	0.715	-1.33		1.54	-0.789	5.18	-0.0956	1.59	5.2	5.63		0.108	1.31	9.06	3.76	3.64	3.94	4.26
0.395	0.826	1.34	1.77	0.0162	2.24	-1.75		1.05	-0.00187	4.25	0.981	2.73	4.89	5.84		0.846	2.95	9.72	3.77	2.78	2.34	5.06
0.719	1.11	2.21	1.4	0.426	1.48	-2.44		1.04	0.184	5.43	-2.22	0.478	5.89	5.95		2.21	3.07	9.62	3.97	4.79	4.97	5.35
-0.0349	0.432	3.13	0.203	1.22	1.63	-0.958		1	0.168	4.75	0.0101	2.61	6.78	5.45		0.721	4.13	9.98	3.67	1.55	4.68	4.89
0.658	0.904	3.3	1.45	1.33	0.986	-1.89		2.08	-0.0326	5.23	-1.43	1.99	5.24	5.25		1.39	2.26	9.29	3.86	3.83	4.21	5.56
1.65	1.34	3.17	0.552	0.603	0.102	-1.88		1.32	0.428	4.34	-0.799	1.32	6.31	4.94		2.05	2.49	10.2	1.94	3.12	4.22	6.23
0.649	1.85	1.91	2.55	1.95	2.13	-3.1		1.46	-0.456	5.77	-0.683	1.97	6.5	3.8		2.57	3.08	8.56	4.57	3.2	2.9	5.97
-0.0482	0.752	2	0.817	1.39	2.49	-2.76		0.818	-0.369	4.53	-0.193	1.36	7.14	4.47		0.557	4.45	11	4.26	3.38	4.65	5.82
0.662	0.982	2.71	-0.786	1.82	1.27	-2.26		0.346	-1	4.34	0.616	0.916	7.54	4.02		1.75	4.14	10.8	2.53	3.37	4.07	5.2
1.43	0.944	2.83	1.11	1.48	1.86	-1.09		0.473	-0.426	4.75	1.38	1.46	7.64	3.54		2.45	4.15	9.7	4.36	0.665	4.67	6.56
0.761	1.41	2.59	0.852	-0.0631	1.69	-2.8		1.93	-0.439	4.48	0.238	1.89	7.14	4.7		1.78	4.61	9.46	3.13	1.82	4.26	5.29
1	1.34	1.49	2.55	0.517	3.08	-2.31		2.14	-0.337	4.76	-0.179	1.73	8.42	4.4		3.11	4.06	8.18	4.67	2.47	4.62	5.2
1.55	1.37	2.51	2.34	-0.33	1.29	-1.63		0.548	0.162	3.6	-0.965	2.83	9.02	4.93		3.01	3.52	9.31	4.1	3.52	4.57	4.56
-0.276	1.02	2.51	0.276	1.41	1.61	-1.95		0.463	-0.635	3.82	2.04	1.67	8.22	4.71		3.14	3.73	7.5	3.74	3.55	3.09	5.54
-1.27	1.17	2.2	0.94	2.58	2.57	-2.18		1.75	0.107	3.13	-0.596	2.31	6.4	4.56		3.59	4.48	8.13	3.19	0.974	2.82	5.45
-0.303	0.63	2.64	0.329	2.44	1.59	-1.71		1.02	0.938	6.2	0.746	1.82	7.71	4.59		4.96	3.92	8.97	2.65	1.85	3.3	5.06
-0.412	-0.742	1.43	0.258	1.54	1.41	-1.85		0.698	1.33	5.72	0.907	2.05	8.01	4.55		5.63	3.35	9.84	3.94	4.01	3.08	4.44
-0.141	-0.408	1.59	0.0477	0.595	1.03	-3.24		0.988	1.4	4.15	0.699	1.46	6.32	4.91		6.36	3.86	8.37	5.18	3.8	5.09	4.17
-0.225	1	2.36	1.88	-0.713	0.764	-2.19		2.37	1.7	2.85	-0.053	2.61	7.61	5.69		5.81	5.04	8.57	3.93	1.98	3.52	3.85
-0.53	0.946	2.49	0.484	0.814	1.38	-1.42		2.21	1.58	4.65	0.877	3.48	5.75	6.19		7.14	5.58	8.83	3	3.14	5.55	2.81
-0.00611	1.5	3.45	1.27	2.56	1.31	-1.18		1.58	0.768	4.94	0.282	3.89	5.38	4.84		7.09	3.88	8.91	2.05	3.68	4.61	3.06
0.484	1.08	2.01	-1.91	0.947	2.14	-2.77		1.01	0.343	3.28	-1.21	3.94	7.21	4.34		6.51	3.21	9.67	4.24	4.56	1.76	3.69
-0.0857	-0.187	1.44	0.822	0.635	1.94	-3.73		0.504	0.428	4.19	2.03	3.26	7.36	4.15		4.7	2.77	7.37	4.95	3.55	3.04	3.36
-0.233	0.422	1.83	1.64	0.723	1.4	-2		1.3	0.482	3.57	0.105	1.89	6.65	2.39		4.1	4.14	8.64	2.4	3.37	6.12	3.52
-0.209	0.476	1.63	1.32	0.338	0.66	-1.57		1.32	0.362	4.23	0.791	1.45	6.26	2.81		5.48	2.33	9.22	2.35	4.79	3.62	3.06
0.527	1.34	2.27	2.52	1.43	1.08	-2.01		1.72	0.11	3.88	0.9	2.01	6.3	2.48		4.65	3.06	9.95	2.81	3.25	4.52	3.82
0.592	0.575	2.06	2.23	1.73	3.07	-1.65		0.251	1.42	3.56	0.624	2.79	6.5	2.89		5.67	2.69	8.98	4.6	2.13	3.53	2.74
0.19	0.276	1.45	2.41	2.81	1.92	-2.14		-0.296	0.637	2.22	0.555	3.33	7.32	2.9		4.39	2.36	8.94	2.82	2.73	3.96	3.38
0.0665	0.723	2.13	0.931	0.938	1.09	-1.62		0.000806	1.26	3.8	0.324	2.34	5.38	2.77		5.5	2.88	9.97	2.38	3.34	3.61	4.3
-0.383	0.81	0.529	1.34	1.05	1.31	-1.58		0.678	0.476	2.91	0.622	2.38	7.75	3.83		4.2	2.48	8	2.95	5.05	2.62	3.11
-0.592	0.619	0.555	0.74	-0.0676	1.95	-0.738		1.58	1.28	3.16	-0.166	1.39	5.2	3.44		4.73	3.09	10.8	1.93	4.46	4.61	3.93
0.23	0.574	2.16	1.22	0.223	0.942	-1.19		0.899	2.03	3.56	1.18	3.08	6.54	4.23		5.15	2.15	10.4	2.04	4.97	4.63	3.96
-0.212	0.864	1.39	2.15	0.366	2.46	-2.73		0.42	1.54	5.35	0.775	3.37	6.43	3.76		5.2	2.16	8.17	1.74	3.78	3.89	4.39
-1.09	1.01	0.86	0.552	1.9	2.32	-1.5		0.148	1.9	4.16	0.189	2.26	5.36	3.33		4.52	2.89	6.96	0.702	1.26	2.78	4.6
-1.17	0.809	1.54	0.714	0.879	2.1	-2.99		0.435	1.89	5.57	0.797	3.83	6.84	2.77		4.18	2.07	8.89	2.2	2.4	3.61	4.81
-1.14	1.11	0.932	1.01	1.45	2.39	-1.42		1.32	1.38	6.69	0.96	2.79	6.06	2.99		3.35	2.13	11	2.62	4.04	3.02	4.9
-1.82	0.92	0.0901	0.476	-1.37	2.31	-1.75		0.499	1.48	4.57	0.0102	1.94	7.42	1.19		3.84	3.11	9.22	3.04	2.33	3.76	5.16
-1.76	0.773	0.239	0.98	0.00724	2.26	-1.14		0.471	0.059	3.6	0.879	0.339	6.18	1.22		2.23	4.94	8.67	0.952	3.13	3.68	4.79
-1.51	0.654	1.34	1.9	-0.463	2.71	-2.95		-0.437	0.782	3.89	-0.984	3.2	5.96	2.59		1.43	5.2	8.64	0.929	3.47	3.55	5.34
-0.525	-0.166	2.36	0.994	0.00649	1.41	-2.66		0.0912	0.23	2.76	-0.798	2.34	6.68	2.38		1.65	3.23	7.09	1.23	3.01	4.25	4.57
-1.01	0.492	0.712	1.53	-0.8	1.19	-2.85		0.891	0.12	3.37	-0.0417	2.32	6.91	2.75		2	2.67	9.63	2.14	2.78	2.66	4.58
-0.465	0.103	2.29	1.82	-1.95	2.24	-2.13		0.643	0.419	3.07	0.608	1.76	5.74	2.79		2.35	4.49	9.01	1.74	3.7	2.28	5.16
0.456	0.0815	1.76	1.49	1.84	2.27	-2.46		1.21	-0.0856	3.69	0.471	2.91	7.68	2.8		2.65	2.65	7.98	1.36	5.88	3.45	5.51
-1.24	-0.0238	1.62	-0.375	-0.53	2.33	-2.73		0.965	-0.681	3.39	2.32	2.06	7.18	1.82		1.3	1.86	8.94	1.05	3.87	5.14	6.05
-1.6	1.39	0.132	1.1	-0.883	2.87	-1.94		1.92	-0.364	3.74	0.774	2.78	7.58	1.03		2.27	3.23	7.42	1.97	2.62	2.35	7.14
-1.75	0.481	0.511	2.64	-0.326	3.15	-1.23		2.03	0.192	5.28	2.48	3.91	6.19	1.9		2.36	3.78	6.7	2.82	3.81	1.78	7.92
-1.39	1.01	1.82	2.05	-0.561	1.01	-0.666		2.06	-0.0169	5.78	0.494	2.13	6.06	0.649		0.75	2.33	10.4	1.35	4.94	3.84	7.43
-0.34	0.353	1.99	2.49	-0.642	1.93	-1.08		2.26	-0.122	3.98	0.871	2.11	6.31	0.839		1.33	3.3	8.69	3.39	4.87	5	6.99
-1.46	0.974	0.943	1.67	1.33	1.71	-1.15		2.96	-0.444	3.53	2.53	1.34	7.36	2.22		1.21	1.59	7.3	0.83	3.99	4.79	5.92
-1.26	0.45	2.03	1.68	0.18	2.25	-2.09		2.61	-0.849	3.99	-0.346	-0.0841	6.52	1.43		0.905	1.76	7.51	0.63	6.34	3.47	5.1
-1.74	0.496	1.94	-0.347	0.617	1.59	-2.45		2.26	-0.0779	3.88	2.51	0.415	7.3	1.27		0.57	3.86	6.56	2.25	3	3.14	7.07
-0.785	0.979	1.85	1.74	-0.916	1.36	-1.13		1.74	-0.32	3.84	1.13	0.354	6.23	1.16		0.38	4.23	7.22	4.25	3.46	4.52	9.08
-1.45	0.462	2.44	1.69	-1.21	1.57	-1.59		2.75	1.08	3.84	0.517	1.74	5.16	0.773		0.889	3.74	8.45	0.275	1.77	4.85	7.76
-0.794	0.38	0.919	1.07	-1.8	2.78	-0.83		3.32	0.265	5.14	1.31	1.92	6.91	0.538		-0.00453	3.21	7.71	2.16	4.18	4.21	8.66
-0.981	0.119	-1.12	1.38	0.809	0.503	-0.849		3.32	0.735	4.71	-0.105	2.18	5.4	0.93		0.4	3.43	6.38	1.01	4.49	4.2	7.48
-0.901	0.363	0.261	1.22	-0.129	0.567	-1.56		3.11	0.872	3.5	0.086	1.6	5.27	1.29		-1.28	4.22	8.06	0.814	4.25	3.43	7.71
-0.53	0.0442	1.81	0.745	-0.373	1.36	-1.18		2.83	0.923	4.26	0.285	2.34	5.26	1.59		-0.0945	3.55	6.22	0.924	4.41	2.44	7.69
-0.921	-0.197	1.58	1.48	-0.000244	0.293	-1.89		3.32	0.696	4.73	1.26	2.5	4.97	1.22		0.566	2.86	7.7	0.905	3.84	2.51	7.07
-0.859	-0.385	1.72	-0.206	0.0644	-0.0181	-3.39		2.74	1	3.66	-1.5	1.21	5.06	1.57		1.1	4.08	7	2.85	4.26	1.89	5.7
-0.832	0.283	1.04	1.72	0.73	-0.314	-1.88		2.94	1.39	5.11	-1.76	1.36	6.24	1.58		1.19	4.11	8.01	3.45	3.87	2.36	5.18
-1.54	-0.428	0.53	2.67	-0.487	0.257	-1.98		2.46	1.61	4.42	0.268	1.49	5.65	2.04		1.37	4.74	9.45	3.47	6.34	1.63	5.3
-1.79	-0.396	2.06	1.32	-1.24	-0.722	-1.36		3.04	1.74	4.57	0.584	1.09	4.16	2.72		2.05	3.8	7.01	2	2.58	2.23	4.11
-1.47	9.39e-05	1.56	1.11	-0.903	0.797	-2.39		2.49	2.05	2.75	1.6	2.18	3.96	2.08		2.83	2.89	8.8	1.09	2.53	1.76	2.94
-2.03	0.763	1.39	1.59	-0.696	1.27	-1.69		1.96	1.26	3.63	0.94	1.7	5.44	1.74		2.13	3	9.91	1.9	1.59	0.905	3.02
-0.979	0.53	0.899	2.18	-3.02	1.81	-2.29		2.45	1.39	4.05	0.616	2.99	6.85	1.07		2.82	4.96	9.13	3.04	3.95	1.37	3.57
-2.63	-0.375	0.447	-0.371	0.0228	1.28	-1.69		2.79	1.75	4.69	0.0344	1.56	5.68	0.499		2.84	4.29	7.41	2.44	2.88	0.904	3.72
-1.73	0.579	1.35	1.99	-1.4	-0.313	-0.793		2.37	1.28	3	2.51	-0.0152	4.8	0.386		4.75	4.02	7.24	0.519	2.84	2.36	5.7
-2.11	-0.215	1.06	0.0138	-0.723	0.0837	0.668		2.12	1.58	3.66	1.43	0.106	5.25	1.04		3.23	4.85	8	1.92	2.98	2.53	4.69
-0.897	-0.017	1.3	2.07	0.148	1.15	-0.912		2.47	0.624	5.11	1.86	1.19	4.63	0.957		3.22	3.24	10.8	0.984	5.47	0.609	3.74
-1	-0.406	1.88	2.17	-0.316	2.18	-1.19		2.61	1.16	3.73	1.05	1.66	5.06	0.719		2.59	2.97	8.68	1.97	2.41	1.46	3.27
-2.99	-0.333	2.28	1.42	0.245	2.12	-0.764		2.55	1.62	5.31	0.275	1.12	4.09	-0.692		2.59	3.99	8.75	3.34	2.68	1.26	1.86
-2.62	-0.868	1.19	1.72	0.237	1.19	-1.43		2.52	1.4	3	1.07	1.07	5.85	0.715		1.9	2.81	7.6	2.57	4.4	1.02	1.88
-1.8	-0.135	-0.304	2.19	1.54	0.679	-0.649		1.83	0.975	1.57	-1.02	0.886	4.61	0.539		-0.013	2.98	9.54	1.05	2.19	1.98	3.03
-1.55	0.529	2.35	3.39	1.17	2.39	-0.801		2.71	0.688	4.22	1.01	3.42	4.84	0.507		0.625	2.69	7.82	2.09	3.08	2.55	3.6
-2.02	-0.318	0.484	2.04	0.356	1.92	-1.71		3.39	0.593	2.31	1.75	0.714	3.76	1.22		0.526	2.71	8.8	1.88	2.27	3.26	3.54
-2.33	-1.19	1.3	2.06	-0.663	1.11	-1.16		2.77	0.837	3.65	0.7	2.4	4	2.09		2.69	2.6	7.86	1.54	4.03	1.32	3.53
-1.07	-0.882	1.3	2.21	-0.156	1.61	-1.41		2.59	1.04	2.42	1.29	2.12	5.25	1.96		2.76	2.61	7.43	2.36	4.51	-0.75	1.91
-1.57	-1.13	0.509	2.45	1.16	2.16	-1.24		2.8	1.82	3.15	0.913	2.74	5.69	2.47		2.48	1.62	8.59	1.95	1.8	1.67	1.47
-2.03	-0.618	1.72	3.01	0.669	1.03	-3.22		2.86	1.27	4.78	1.26	3.09	4.66	1.95		0.617	2.2	8.5	3.15	3.96	2.21	1.39
-1.92	-0.906	-0.115	1.79	0.547	0.749	-1.29		3.37	1.44	2.44	0.407	2.49	5.07	1.43		-0.426	3.17	6.82	1.98	2.96	2.6	2.06
-1.62	-1.15	-0.133	1.41	1.65	1.22	0.937		4.31	1.9	2.17	1.06	2.5	3.63	1.21		0.264	2.75	7.72	2.89	3.2	3.28	2.83
-0.916	-0.259	-0.082	2.72	0.589	1.83	-0.147		4.45	2.06	2.55	0.182	1.37	4.5	0.794		0.667	2.03	7.66	1.49	4.65	3.43	1.29
-0.545	-0.585	1.07	2.15	0.223	1.96	-1.2		4.87	2.27	1.98	1.75	2.51	5.87	1.1		0.0246	2.36	6.37	4.28	6.44	3.48	3.12
-0.483	0.0126	1.73	0.533	0.412	2.09	-0.875		4.81	2.21	2.5	0.615	3.4	6.38	0.617		0.128	3.32	8.16	2.29	4.32	2.8	2.55
-0.722	-0.38	1.94	0.54	1.14	3.01	-0.711		4.26	2.4	2.46	1.11	1.53	6.98	0.0784		0.257	2.64	7.75	1.43	4.75	4.37	2.04
-0.172	-0.0873	0.713	3.45	1.29	2.38	-0.183		4.83	1.9	3.5	1.4	2.35	4.65	0.559		0.0653	2.51	7.9	2	4.55	4.2	3.06
-0.834	-0.035	1.07	2.41	0.359	1.37	-0.316		4.34	1.75	2.3	1.3	1.98	5.06	0.865		-0.445	2.37	9.26	2.28	6.33	2.29	2.93
-0.643	-0.212	1.19	1.05	0.767	1.71	-0.146		2.96	1.15	4.19	0.711	2.49	3.85	1.02		0.462	1.87	8.2	2.55	4.19	4.29	3.03
-0.813	-0.297	-0.0542	1.09	-0.418	2.2	-1.3		4.09	0.556	4.76	1.49	1.34	4.6	0.392		-0.0683	1.48	8.1	1.34	3.68	5.35	3.51
-1.52	-0.76	0.829	0.935	-0.58	1.14	-0.75		3.69	0.658	5.61	2.46	1.74	5.13	1.99		0.158	3.28	8.82	1.63	4.21	4.71	2.4
-1.68	-1.21	0.996	0.817	-0.765	1.63	-1.89		3.65	1.12	4.32	0.411	1.55	4.71	1.96		-0.345	3.26	7.99	2.71	1.45	3.93	1.21
-2.84	-0.407	2.55	0.477	1.08	-1.05	-2.03		3.12	1.33	4.65	2.2	1.7	4.05	2.15		-1.09	1.85	7.85	2.87	3.4	4.25	2.01
-1.68	-0.702	1.64	1.62	0.717	1.61	-1.07		2.89	0.611	4.19	1.32	3.03	4.73	1.48		-1.56	2.08	9.5	2.21	2.04	5.73	1.96
-2.07	-0.47	-0.568	0.482	-0.225	0.775	-1.08		2.51	0.703	2.8	1.74	2.42	4.41	1.55		-0.249	2.31	9.04	2.08	3.82	2.36	1.2
-2.32	-1.03	-0.438	1.82	-0.337	1.71	-1.08		3.04	1.09	2.76	0.345	1.21	5.02	1.6		-0.544	1.42	9.67	4.72	4.41	4.28	1.84
-3.77	0.233	-0.732	0.224	-0.0696	0.532	0.106		3.26	1.21	4	1.64	1.46	5.32	2.1		0.298	1.65	9	2.83	4.11	3.08	1.44
-3.9	-0.419	1.08	1.27	0.266	0.000631	-2.18		2.77	1.21	3.38	0.507	1.53	3.52	2.08		-0.553	1.92	10.2	2.08	2.21	4.89	1.71
-2.37	0.371	1.88	1.76	-0.193	-0.987	-1.12		3.08	0.445	3.58	0.205	2.4	5.91	1.68		-0.497	1.84	7.96	2.09	3.75	3.73	1.88
-1.87	-0.332	0.959	3.56	-0.847	0.747	-0.735		3.32	1.08	3.29	-0.0783	1.15	2.74	1.8		-0.322	3.69	9.21	2.25	3.2	3.02	1.75
-2.2	-0.599	0.658	0.812	0.0758	0.64	-0.246		2.56	0.697	4.3	1.78	0.472	4.1	1.36		-0.587	2.05	9.86	2.63	3.2	5.25	2.39
-1.96	-1.27	0.82	1.6	0.502	0.473	-1.41		2.11	0.974	4.43	0.367	1.92	5.23	0.579		-0.954	3.24	7.31	1.57	1.56	3	2.22
-3.12	-0.909	1.97	0.937	-0.281	0.458	-0.951		1.76	0.602	4.76	1.51	2.21	4.06	0.395		-0.148	3.25	7.75	2.66	4.35	3.66	1.56
-1.53	-0.491	2.89	1.65	0.296	-0.661	-1.19		3.09	0.496	3.73	-1.28	2.01	5.3	1.07		-1.19	3.87	5.1	2.61	7.01	2.65	1.88
-1.34	-0.419	1.66	1.45	0.623	0.197	-1.12		3.59	0.968	2.91	0.896	1.95	5.65	0.527		-0.725	3	8.58	1.66	3.89	4.76	2.87
-1.8	-0.931	1.83	1.84	1.5	-0.414	-0.703		3.01	1.31	3.78	0.76	1.84	5.05	1.11		0.00372	4.28	8.4	2.81	3.12	3.15	2.83
-2.05	-0.561	1.6	3.15	0.631	-0.227	-0.0313		2.26	1.22	2.79	0.0893	2.7	4.11	-0.347		-0.221	2.57	8	2.21	2.36	4.31	2.5
-2.32	-0.235	2.4	0.396	0.568	1.26	-1.01		3.05	0.41	3.51	1.25	0.552	5.67	-0.234		-0.0506	3.15	6.63	3.15	4.04	2.89	2.64
-2.25	-0.264	1.1	0.425	0.129	0.405	-1.3		3.19	-0.0602	3.49	1.85	1.78	5.61	-0.341		0.849	2.33	6.89	3.22	2.33	3.24	2.47
-1.84	0.913	2.63	-0.0105	0.755	0.67	-0.814		3.2	-1.05	3.21	1.94	1.67	4.4	-0.856		0.778	2.98	7.5	2.21	3.1	3.42	1.28
-2.57	0.0808	2.35	0.642	0.432	-0.245	0.24		2.92	0.404	2.58	-0.661	0.805	4.75	-0.392		0.151	3	8.16	4.09	5.83	3.09	1.81
-1.76	-0.231	1.54	1.21	1.18	0.507	-1.69		3.22	-0.0308	2.36	-1.08	1.7	6.2	0.436		-1.38	1.83	8.57	5.05	4.95	4.38	2.99
-0.87	-0.386	1.92	1.14	1.55	-0.594	-1.35		3.39	-0.327	3.59	-1.12	2.47	4.37	0.592		-1.58	3.55	7.72	0.8	4.17	3.06	1.98
-1.02	-0.743	0.939	1.32	0.538	0.293	-0.456		3.7	-0.468	2.87	-1.45	0.331	5.03	-1.06		-0.71	3.28	7.03	0.482	1.52	4.62	2.4
-0.71	-0.126	1.82	-0.542	2.31	1.06	-1.02		3.81	-1.08	3.4	-0.878	1.63	4.38	-0.91		-0.691	2.1	5.47	2.56	4.06	3.57	1.93
-1.61	0.44	1.27	1.64	-0.609	-1.19	-1.29		3.92	-1.43	1.88	0.855	1.74	6.46	0.385		1.72	2.72	6.39	1.66	2.84	3.81	0.538
-0.802	0.479	1.63	1.03	0.622	0.061	-1.29		3.82	-1.3	3.48	-0.554	1.48	5.65	1.09		1.13	3.23	7.2	3.26	4.01	3.31	0.371
-2.24	0.264	0.617	1.68	0.827	-0.0396	-1.06		4.38	-0.67	3.95	-0.102	1.85	4.92	0.676		0.571	1.67	8.05	1.74	3.93	3.26	0.957
-2.05	0.543	1.19	1.35	-0.42	-0.222	-1.01		3.98	0.711	4.35	0.112	0.688	4.57	1.01		0.387	2.58	7.53	4.31	3.23	3.73	0.506
-1.37	1.19	0.575	2.5	0.792	1.43	-1.82		4.28	0.282	3.33	0.338	1.91	4.33	0.38		-1.7	3.83	6.3	3.78	4.83	4.62	2.28
-1.39	1.22	2.69	0.331	-0.943	0.0863	-0.96		3.94	0.0576	2.71	-1.47	2.66	4.86	1.05		-0.528	1.98	7.03	1.92	2.67	2.94	1.91
-1.18	1.55	0.726	0.596	0.0949	0.328	-1.64		2.79	0.326	3.07	-0.491	1.69	5.67	0.289		-0.778	1.98	6.21	2.74	3.33	4.14	2.3
-1.13	2.33	1.66	-0.0515	-0.258	0.239	-2.24		3.14	-0.7	4.64	0.0872	2.64	5.84	-0.12		0.961	2.22	4.8	3.06	2.91	1.93	1.42
-0.448	1.2	1.46	0.772	-0.805	-0.17	-1.38		3.06	-0.571	3.05	-0.41	1.54	4.71	0.327		0.0424	0.99	4.75	2.96	1.65	2.76	1.32
-0.61	1.25	1.09	0.895	0.119	-0.519	-2.32		2.97	-0.822	3.7	-0.466	1.97	5.74	0.0228		0.386	1.56	4.95	2.72	3.72	2.5	0.699
-0.655	2.44	3.14	1.4	0.604	0.898	-1.92		2.75	-0.956	3.11	-0.377	0.685	6.1	0.351		0.231	1.78	6.98	2.02	2.87	2.92	1.12
-1.13	1.33	3.28	0.276	-0.11	0.692	-1.21		2.8	0.136	3.65	0.843	1.29	4.05	0.528		1.1	1.6	7.19	2.49	3.31	1.27	1.33
-0.49	2.66	1	-0.642	1.1	1.44	-2.84		2.93	0.292	2.53	-1.7	1.2	5.47	0.543		2.39	2.78	7.37	2.35	2.5	2.73	2.59
-1.4	2.33	1.56	-0.346	-0.0446	0.0819	-1.74		3.67	0.258	2.13	-0.671	0.555	3.99	-0.229		1.96	1.48	4.42	2.39	3.57	3.93	1.74
-1.6	2.02	0.924	0.541	-0.339	-0.895	-3.33		2.88	0.297	3.67	-0.508	3.18	4.33	-0.452		3.75	1.72	5.08	1.81	5.24	0.77	2.3
-1.22	1.68	0.873	-0.154	1.71	-1.57	-1.46		3.58	0.506	4.25	0.682	2.1	4.55	0.107		3	2.44	4.21	1.64	3.99	3.06	1.47
-1.8	2.27	0.738	0.295	0.811	-2	-2		2.75	0.944	3.13	-1.5	1.97	4.32	-0.316		2.71	1.49	5.29	2.48	2.84	3.15	1.57
-1.11	2.86	0.0646	2.17	0.369	-1.42	-1.32		2.97	1.2	2.9	-0.3	1.69	4.26	0.29		3.21	1.07	7.56	2.81	5.18	3.07	1.61
-0.564	2.85	0.709	1.35	-0.808	-0.484	-2.71		3.61	1.23	3.49	0.283	0.692	4.24	0.225		2.46	1.18	5.16	2.34	5.79	2.47	0.832
-1.39	3.14	1.73	0.931	0.47	-1.2	-2.85		2.93	0.851	4.06	-0.766	3.1	3.28	0.116		2.75	0.252	7.23	2.35	2.28	2.73	0.914
-1.48	2.35	0.0488	1.03	-0.507	0.631	-3.25		2.81	0.153	2.88	0.138	2.98	4.41	0.365		3.19	1.93	6.93	2.56	3.9	2.71	1.63
-1.25	2.24	1.88	0.798	0.36	-0.287	-2.87		2.53	0.147	3	-0.85	3.02	3.99	0.161		3.57	1.35	5.93	1.11	1.71	2.53	0.983
-1.11	3.11	0.898	0.666	0.469	-0.154	-3.64		2.91	0.132	2.58	-0.676	1.69	5.31	1.53		3.68	0.57	5.43	2.44	4.08	0.856	1.15
-1.31	1.88	0.0118	0.744	2.03	1.65	-2.6		2.82	-0.137	2.22	-0.936	1.58	4.15	0.97		2.89	1.71	6.38	1.38	3.2	1.45	2.59
-1.29	2.01	-0.152	0.464	0.0253	0.0201	-2.35		3.59	-0.334	3.38	-0.471	2.57	3.89	1.67		3.2	1.22	5.39	1.27	4.28	3.27	1.38
-1.84	2.44	-0.128	1.84	0.941	-1.59	-2.1		3.44	-0.813	4.73	-0.654	1.57	4.76	1.08		2.72	1.25	6.56	2.09	3.4	1.92	1.1
-2.2	2.62	0.508	2.41	0.612	-0.199	-1.81		3.88	-0.52	4.57	-0.202	1.83	4.12	1.3		2.43	1.42	5.58	3.35	4.77	3.47	0.121
-1.55	2.14	0.911	1.79	0.458	-1.21	-2.53		3.25	-1.2	4.13	-1.16	1.7	3.95	1.28		1.67	1.88	5.88	2.92	3.77	4.44	1.34
-1.61	2.13	0.664	0.932	0.585	-0.972	-3.29		3.38	-0.168	3.59	-0.781	1.33	5.49	0.117		2.41	1.29	6.66	1.08	3.06	3.48	1.8
-1.74	1.96	-0.454	0.709	0.26	0.377	-1.35		3.24	0.0626	4.4	-1.55	1.54	4.74	0.439		3.07	1.26	5.47	2.54	2.27	2.68	2.65
-2.44	1.94	1.01	2.14	0.781	-0.853	-2.39		4.03	-0.362	4.09	-1.47	1.7	4.67	0.0324		3.66	1.18	4.69	1.91	3.63	1.87	2.34
-1.78	1.78	0.0956	1.68	1.22	-0.156	-1.6		4.21	-0.653	3.5	-0.607	2.08	3.9	1.7		2.62	0.969	4.57	3.83	2.37	3.09	0.996
-1.57	2.74	1.49	0.954	0.397	0.458	-1.8		4.22	-0.723	3.1	-1.45	1.9	5.08	2.89		2.9	-0.0221	5.55	4.06	4.66	3.51	-0.132
-2.52	2.23	-0.361	0.237	0.419	-0.243	-3.02		4.79	0.509	5	-0.672	2.43	4.93	2.83		2.81	1.55	6.02	2.49	1.19	4.37	0.301
-2.28	2.31	1.18	1.87	0.859	-0.307	-2.33		5.42	-0.272	2.71	-0.185	2.13	2.53	3		2.11	1.06	5.05	3.61	1.89	3.34	-1.05
-3.14	2.06	-1.22	1.86	0.827	0.602	-2.58		5.56	0.548	3.46	-1.36	2.32	3.82	2.85		2.53	1.6	4.94	2.86	3.14	0.846	0.491
-3.47	2.42	0.343	1.48	0.785	0.379	-2.51		5.06	0.149	4.81	-2.9	1.7	4.14	1.81		2.12	-0.39	2.91	6.56	1.8	1.34	1.34
-2.72	2.18	-1.46	-1.19	0.0539	0.628	-0.492		4.4	0.654	4.01	-1.57	2	4.68	2.54		2.19	0.54	5.48	1.81	1.76	3.43	1.04
-3.19	1.89	-0.802	3.37	0.646	0.399	-0.484		4.32	0.0922	3.17	-1.21	1.09	2.44	1.47		0.509	0.813	6.19	1.39	2.96	2.55	0.848
-2.74	1.96	-0.017	0.452	1.03	-0.543	-2.23		3.82	-0.0824	2.72	-0.349	2.14	3.28	1.81		-1.04	1.59	6.1	1.77	3.66	2.59	-0.952
-2.96	1.91	-0.284	1.29	2.01	-1.57	-1.41		4.16	0.436	2.26	-0.277	1.26	4.05	1.84		-0.567	3.04	6.69	4.12	3.94	2.87	0.445
-2.64	2.1	1.11	1.42	-0.421	-1.23	-2.03		4.17	0.542	3.51	-0.547	2.73	3.92	2.29		-0.58	0.1	4.12	3.54	4.46	2.18	0.287
-3.1	2.26	0.607	2.28	0.741	-0.215	-1.37		3.68	0.876	2.85	-0.802	2.85	4.66	0.858		-1.02	1.98	6.59	2.99	2.97	1.92	1.97
-1.78	1.31	-0.479	0.0385	-0.0436	0.501	-1.01		3.55	0.713	3.29	-0.121	1.03	3.65	1.85		-0.68	2.34	5.47	2.1	4.06	2.42	1.79
-1.82	1.95	-0.947	0.412	1.04	-0.13	-0.914		3.71	0.647	4.57	-0.121	1.34	4.83	1.46		-0.23	1.98	4.97	1.05	1.31	3.06	1.27
-2.71	2.11	-0.435	-0.574	1.57	-0.46	-1.18		4.72	0.318	2.82	-0.185	2.05	4.03	2.33		-0.619	-1.21	3.56	2.88	2.11	3.88	1.78
-1.69	1.65	-0.104	-0.198	0.434	-0.495	-0.939		3.52	0.365	3.32	-0.961	2.42	4.48	2.53		0.426	1.58	4.38	2.22	2.21	3.16	0.887
-2.42	1.15	0.701	-1.22	0.318	0.0896	-1.03		4.25	0.371	3.83	-1.18	0.975	5.01	2.87		0.693	0.417	4.95	2.87	1.73	3.5	2.68
-2.2	1.28	0.765	-0.222	0.137	0.628	-1.76		1.58	0.903	4.26	-1.06	2.16	3.98	2.98		0.0286	1.19	5.87	3.08	3.7	1.15	1.73
-3.69	0.885	0.0356	0.633	0.847	-1.47	-1.64		1.75	0.802	3.89	-1.63	1.75	4	2.99		-0.202	0.802	5.34	1.85	-0.514	4.31	2.35
-3.51	0.582	0.122	0.2	1.73	0.153	-0.821		1.33	1.84	3.39	1.03	2.08	3.27	3.5		-0.17	0.885	2.22	0.757	2.35	1.39	2.5
-4.24	1.44	-0.839	-0.0203	0.311	0.407	-0.479		1.03	1.54	5.03	-1.07	1.47	4.86	3.23		-1.02	1.58	3.05	2.42	3.17	2.96	1.91
-3.78	0.615	-0.239	0.643	1.2	0.188	-1.31		1.05	1.98	2.67	-1.12	1.51	3.97	2.25		-0.811	1.75	5.1	2.38	4.96	2.67	2.33
-3.29	1.59	-0.727	1.34	0.345	1.17	-1.79		1.02	2.18	5.19	-2.17	1.87	4.69	1.44		-2.27	1.56	5.15	3.46	1.52	1.98	2.47
-4.43	1.4	-0.8	2.06	1.11	1.15	-2.09		0.497	2.12	4.16	-1.32	2.57	5.33	1.8		-4.16	0.509	5	2.41	3.18	0.732	3.03
-4.33	1.23	0.00466	-0.0611	0.773	-0.104	-1.82		1.48	1.66	3.9	-0.588	2.03	5.45	1.57		-3.37	0.76	4.05	3.8	2.2	0.807	3.66
-3.91	0.47	1.16	1.23	1.06	1.37	-0.949		1.8	1.45	3.47	0.314	2	3.85	1.48		-1.85	0.935	3.66	2.78	0.531	3.26	3.17
-3.52	0.786	0.378	-0.105	0.773	1.57	-1.65		1.48	0.994	4.17	-0.0418	0.956	1.54	0.994		-1.74	0.649	4.62	3.03	3.74	3.22	2.19
-4.36	0.939	-0.534	1.39	1.56	-0.725	-0.871		2.12	1.09	4.96	-1.53	1.96	3.27	1.74		-1.8	0.509	5.14	1.61	2.51	2.27	2.13
-4.48	0.124	-0.311	0.426	0.172	1.14	-1.34		2.25	1.46	2.17	-2.06	2.1	2.24	1.02		-1.09	2.94	4.79	2.05	2.44	3.41	1.98
-4.18	0.126	-0.255	0.973	0.347	2.02	-0.867		1.79	1.71	3.56	-1.07	1.63	3.46	0.283		-0.25	2.15	3.08	2.77	0.515	1.36	0.686
-3.88	0.616	1.02	1.12	0.623	2.04	-2.23		2.28	1.79	3.24	-2.08	2.36	3.43	0.979		0.228	0.779	4.82	2.5	2.08	2.03	1.21
-3.81	0.353	0.96	0.0291	-1.12	1.19	-0.788		0.716	1.97	2.34	-0.687	0.45	3.06	0.939		0.0426	0.307	5.88	2.58	2.89	1.63	0.529
-4.18	0.0882	1.96	1.79	0.511	0.704	-0.774		1.3	1.7	4.18	-0.348	0.643	3.63	1.5		-0.368	1.44	3.85	1.01	2.19	1.94	1.41
-3.55	0.514	-1.32	1.31	0.201	0.798	-0.0294		1.72	1.85	4.08	-2.94	1.44	2.2	0.692		-2.16	2.3	5.26	2.12	2.3	1.59	1.01
-3.04	0.265	-0.983	1.63	0.83	1.42	-0.607		1.8	1.43	4.47	-1.48	2.9	2.26	0.226		-3.99	1.68	5.23	2.77	1.81	2.9	1.78
-3.57	0.635	0.11	1.48	0.76	1.23	-1.34		3.32	1.03	3.33	-0.0732	1.55	6.04	0.357		-1.72	2.05	4.54	2.26	0.897	1.96	1.98
-2.64	0.355	-0.429	2.26	1.09	0.867	-1.91		2.58	1.33	5.26	0.199	2.58	4.71	-0.0436		-0.939	3.36	4.41	2.89	0.144	2.1	1.69
-4.08	0.133	-0.886	1.49	0.714	-1.61	-2.26		3.89	1.73	5.66	-0.135	2.34	4.29	-0.606		-1.58	1.86	6.23	3.91	-0.187	2.42	2.25
-3.92	0.449	-1.06	0.952	-0.0243	-1.52	-2.7		3.95	1.9	5.11	-0.448	1.82	4.69	0.103		-1.13	0.343	3.44	3.05	-0.794	0.323	2.1
-4.46	0.93	-1.17	1.22	0.728	-0.296	-1.08		4.55	0.912	3.63	-1.61	0.938	4.2	-0.579		-2.13	0.569	3.37	1.3	3.48	3	2.17
-3.36	0.801	0.418	0.583	0.97	0.191	-1.84		3.04	1.74	4.62	-1.05	1.87	4.22	-0.765		-3.17	1.91	5.55	2.05	1.87	3.18	1.68
-3.45	1.2	0.476	2.4	1.16	0.0228	-1.28		2.55	0.769	3.31	-0.776	2.11	4.02	-1.21		-1.81	3.22	3.97	2.31	3.36	3.22	0.264
-3.63	1.51	0.391	-0.204	0.396	1.4	-1.49		1.79	1.13	4.45	-0.549	1.75	4.49	-0.818		-2.71	2.12	6.15	1.88	0.663	0.63	0.869
-3.26	0.855	1.67	-0.931	-0.0555	2.08	-1.74		2.02	1.24	4.61	-0.754	1.89	3.18	-0.973		-0.974	0.635	6.12	3	-0.896	1.44	0.802
-2.76	1.33	0.155	1.19	0.0519	0.633	-2.31		1.1	1.82	4.72	-2.35	2.86	4.29	-0.534		-1.08	2.84	5.63	1.73	2.76	0.86	1.97
-2.45	0.233	0.699	0.882	1.98	1.18	-1.6		1.54	1.85	2.76	-0.394	1.33	5.27	-0.000805		-1.54	2.32	6.65	1.94	4.08	2.81	0.41
-2.86	1.01	0.347	0.869	1.25	-0.205	-1.06		2.16	1.55	1.36	0.00429	1.93	3.18	0.193		-2.05	3.19	5.21	1.85	2.35	1.96	0.882
-3.14	1.7	-0.51	1.67	-0.191	2.12	-1.38		2.35	2.53	1.05	-0.18	3.63	4.35	-0.604		-2.06	2.18	5.29	2.1	3.04	1.08	0.31
-2.85	1.42	-0.912	1.39	0.997	2.24	-0.187		1.68	1.95	2.93	-0.709	2.28	5.05	-0.515		-3.18	3.58	5.75	1.12	1.89	1.31	0.594
-2.18	0.987	0.356	0.0854	0.205	0.125	-0.589		1.49	2.87	4.37	0.36	1.05	5.24	0.0627		-0.951	1.36	4.27	1.28	0.83	1.86	0.405
-1.62	0.27	0.927	1.64	1.79	-0.223	-1.47		2.17	1.79	3.64	-0.984	2.23	2.63	-0.147		-0.777	0.823	6.26	1.05	1.8	2.12	0.672
-2.17	0.921	1.99	-0.0922	1.01	1.05	-0.578		0.619	1.64	2.6	1.09	1.52	3.97	-0.533		-1.29	2.27	3.26	1.01	1.6	2.47	1.12
-1.69	1.36	-0.616	-0.957	0.742	0.844	-0.965		0.523	1.34	2.43	-0.957	2.61	4.4	-0.616		-1.98	2.96	4.23	3.55	1.73	1.66	0.591
-1.29	1.23	-0.389	0.376	0.0378	2.38	-0.951		1.55	0.877	1.68	0.652	1.92	4.13	-0.251		-1.6	2.7	3.52	3.6	2.73	1.1	0.506
-1.29	1.92	0.763	1.23	1.23	1	-1.5		1.65	-0.25	2.83	0.781	1.22	5.09	-0.954		-2.51	2.84	3.52	2.28	0.881	1.61	1.19
-1.73	1.47	0.37	0.272	-0.47	1.94	-1.88		1.36	-0.0444	3.65	-0.501	1.49	4.55	-1.94		-3.14	1.01	2.74	2.43	3.07	0.825	2.03
-2.66	1.04	0.963	-0.592	0.389	1.3	-1.03		1.18	0.782	4.37	-0.286	1.95	5.49	-0.701		-1.75	0.248	3.35	2.83	2.51	2.89	3.29
-1.36	1.41	0.114	-0.969	0.336	-0.872	-2.28		1.32	0.543	1.57	-1.16	1.22	7.39	-0.286		-2.49	1.47	4.38	2.5	1.96	2.63	2.65
-1.6	1.51	0.213	1.42	0.468	-0.228	-1.73		1.7	0.596	1.65	0.461	1.64	4.88	-0.467		-0.948	1.11	5.81	1.08	2.16	1.48	2.98
-2.05	1.76	-0.109	-1.41	0.521	2.12	-0.35		1.62	0.874	2.5	-2.43	1.62	4.95	-0.584		-1.87	1.17	6.03	0.246	3.82	1.91	2.01
-1.18	1.68	1.03	0.556	-1.05	1.39	-1.27		0.72	1.29	2.68	-1.52	2.36	4.96	-1.09		-1.14	1.45	3.57	1.92	5.42	2.03	3.37
-1.68	1.76	0.617	1.19	0.00529	0.998	-1.3		1.73	0.989	3.13	-0.869	1.83	4.14	-0.115		-0.902	1.57	4.79	1.86	2.45	1.09	2.58
-0.0108	1.89	0.899	2.81	-1.32	1.12	-1.4		2.61	1.23	3.73	-1.01	1.89	4.85	0.112		-1.62	1.18	4.18	3.08	4.59	2.14	2.13
-0.654	1.73	1.11	-0.198	-0.765	-0.53	-2.01		2.49	1.63	1.96	-0.798	0.7	4.53	0.226		-2.7	1.55	7.25	0.407	3.42	0.656	3.59
-0.747	0.981	1.42	-0.14	0.102	0.00942	-1.83		3.27	1.14	3.34	-0.557	2.28	5.57	0.687		-2.58	-0.0433	4.65	1.89	4.61	2.19	2.68
-0.339	0.805	1.05	1.81	1.14	-0.376	-2.23		3.09	0.851	4.23	-0.924	1.69	4.47	-0.203		-1.8	0.0566	5.89	1.5	3.94	0.512	2.87
-1.88	0.647	0.29	1.26	0.981	2.03	-2.48		4.44	1.94	4.75	1.38	2.49	4.95	0.773		-1.55	1.2	3.75	1.78	3.18	0.643	3.35
-1.54	1.28	0.968	-0.389	1	3.62	-2.43		4.26	1.27	1.74	-2.04	2.02	4.63	0.415		-1.09	1.45	2.55	0.576	2.02	0.928	3.05
-1.16	1.33	-0.0827	-0.652	0.818	1.29	-2.92		3.95	0.799	1.17	-2	0.437	5.35	1.21		-1.56	1.92	2.7	2.29	2.42	2.33	2.72
-0.47	0.949	0.0486	1.58	0.768	1.52	-3.14		4.4	1.51	3.47	-2.39	1.43	4.9	0.828		-2.16	0.522	4.32	1.7	3.47	-0.406	2.9
-1.82	1.09	0.489	0.0457	-1.53	2.35	-2.16		3.9	0.968	2.55	-1.34	0.674	6.36	2.15		-1.38	2.37	2.71	1.39	1.37	1.15	2.09
-0.811	1.57	-0.231	-0.461	-0.135	0.53	-2.03		5.07	0.837	1.97	-1.98	2.28	4.62	1.28		0.298	3.7	3.2	-0.577	1.7	0.576	2.15
-2.47	0.908	0.734	-0.838	0.67	0.117	-1.4		4.81	0.255	2.49	-1.7	2.52	5.36	0.842		-0.273	2.27	4.6	2.08	2.38	1.28	2.62
-1.73	0.723	0.295	1.28	1.25	-1.01	-2.7		5.16	0.143	3.21	-1.43	1.11	5.28	1.18		0.0846	2.42	3.49	2.08	0.786	2.16	3.3
-2.3	1.46	-0.813	2.32	0.253	-0.867	-3.11		5.25	0.759	3.3	-0.436	1.11	6.34	0.862		-0.582	0.563	3.67	0.268	2.53	0.901	2.24
-2.11	0.876	0.652	0.126	1.41	-0.648	-2.04		4.92	0.556	2.64	-0.503	2	2.58	0.563		-0.953	1.34	2.82	1.53	1.58	0.313	3.7
-2.67	1.35	0.0949	1.85	0.957	0.905	-3.39		5.48	0.832	2.48	1.02	0.404	5.07	0.296		-3.19	1.48	3.27	2.02	4.1	-0.155	2.22
-3.11	0.776	1.8	2.39	0.248	0.939	-1.36		4.81	1.05	3.7	1.49	0.31	4.26	-0.458		-2.73	0.509	3.89	1.05	4.49	0.502	2.65
-3.18	1.44	0.274	-2.17	0.378	1.56	-2.07		4.91	1.4	1.62	0.166	-0.041	4.91	-1.19		-1.34	0.00612	3.59	1.92	4.86	1.47	3.48
-3.19	1.76	1.5	0.436	2.15	-0.517	-1.72		5.06	1.2	2.19	-1.28	0.522	3.51	-1.61		-0.994	0.418	4.58	1.24	3.74	0.392	3.81
-4.28	1.01	0.906	0.393	1.3	-0.0547	-0.929		4.1	1.13	2.9	-1.68	-0.0152	2.21	-1.03		-2.55	2.4	0.717	2.03	3.6	-1.07	2.97
-3.3	0.184	1.29	1.18	1.89	-0.174	-1.72		3.88	1.44	2.52	0.197	0.762	4.28	-1.31		-2.41	0.736	1.6	0.94	2.17	0.913	3.02
-3.1	1.21	0.042	1.42	0.972	0.306	-2.29		3.57	0.763	3.58	-0.0225	1.05	2.52	-0.766		-2.45	2.75	1.92	1.02	3.63	1.59	3.16
-2.02	0.808	-0.75	1.01	-0.884	-0.527	-1.21		3.41	0.984	1.63	-0.175	1.71	4.52	-0.443		-3.42	3.67	4.2	-0.846	3.2	0.22	1.56
-2.21	0.333	-0.901	-0.134	1.46	0.339	-1.17		2.62	1.16	3.97	0.317	0.686	5.26	-0.0673		-1.45	2.32	2.13	3.42	3.32	0.451	0.0335
-1.46	0.518	-0.381	-0.0356	1.78	0.579	-0.0587		2.77	1.29	1.51	0.247	1.4	3.55	0.231		-2.01	0.953	3.34	2.05	1.48	-0.0604	-0.439
-2.42	0.523	-0.204	0.976	-0.272	-0.0623	-1.52		3.74	1.22	0.878	-0.682	0.975	4.21	-0.663		-1.43	2.17	2.71	0.769	1.62	-1.48	-0.171
-3.44	-0.251	0.822	1.24	1.4	-1.18	-1.07		3.44	1.25	1.92	-0.816	1.17	1.47	-0.264		-1.4	3.3	4.19	0.672	2.02	0.0111	-1.84
-3.16	1.24	1.71	0.0346	0.108	-0.387	-1.95		1.79	1.74	3.76	-1.29	1.36	3.6	-0.133		-2	2.89	4.09	-1.85	2.87	1.23	-1.16
-2.75	-0.267	0.0453	-0.766	1.76	-0.0832	-2.06		2.29	1.95	3.62	-2.6	-0.509	2.59	-0.0646		-1.6	0.664	3.36	1.41	2.15	0.0519	-1.24
-3.37	-0.566	0.33	-0.0189	1.1	-1.27	-2.3		1.8	2.56	4.17	-0.174	1.9	2.9	0.306		-2.58	2.66	3.04	2.11	3.24	1.28	0.856
-2.9	0.382	-0.0389	1.37	1.05	-0.184	-0.243		1.83	2.61	2.66	0.163	0.976	4.13	0.433		-2.74	2.27	3.67	-1.48	3.32	1.36	-0.00184
-4.09	-0.0369	0.842	2.18	0.353	0.679	0.74		2.1	1.81	3.93	-3.2	2.31	4.02	0.394		-2.54	0.791	3.57	-0.233	3.22	0.746	0.47
-3.64	-0.247	0.708	2.19	0.61	1.53	-0.748		2.52	1.3	3.56	-0.495	2.25	4.43	0.404		-2.64	0.299	3.72	2.18	3.44	0.379	0.749
-2.39	-0.231	1.63	-0.0116	-0.124	0.527	-0.292		1.59	0.799	3.35	-0.663	1.89	3.96	-0.11		-2.25	1.97	1.86	2.53	-0.509	1.22	0.0571
-1.97	0.549	1.7	1.05	0.183	0.46	-0.729		1.76	0.232	4.2	-0.662	2.32	3.77	0.686		-1.9	1.88	2.76	1.6	2.22	2.18	0.356
-1.35	-0.229	0.38	0.947	0.0255	-0.01	-0.558		1.75	1.08	4.57	0.717	0.943	2.44	-1.11		-1.29	2.24	4.43	0.451	1.56	0.566	-0.0465
-0.934	0.557	0.59	1.03	-0.391	0.333	-0.354		2.32	0.778	3.88	0.368	1.08	3.25	-0.186		-3.13	1.92	2.62	0.381	2.03	1.42	0.759
-2.26	0.416	0.189	0.78	0.907	0.296	-1.29		2.23	1.38	3.9	0.248	0.963	3.46	-0.563		-2.87	1.88	4.21	0.725	2.87	1.36	2.1
-1.88	-1.29	2.84	-0.494	0.871	-0.717	-1.47		1.02	1.6	2.92	-1.31	0.366	3.05	-1.33		-2.29	2.11	3.68	-0.801	1.7	1.01	3.03
-0.407	-0.485	0.724	0.946	0.643	-0.435	-1.88		1.11	1.25	3.09	1.14	0.705	4.05	-1.28		-1.11	2.99	4.82	1.48	2.28	0.113	2.94
-0.503	-1.66	2.06	0.846	0.526	0.698	-1.7		-0.496	1.63	3.4	-0.106	1.74	2.77	-1.26		-0.726	1.78	4.33	1.67	2.89	0.96	1.87
-1.56	-1.59	0.238	-0.115	-0.653	-0.427	-1.36		0.666	1.17	4.26	-1.58	2	3.18	-1.29		-0.559	1.79	6.45	2.12	2.59	1.04	0.414
-1.69	-0.699	0.789	1.07	0.0626	1.28	0.406		0.707	1.14	2.76	-0.453	1.7	2.29	-0.525		-1.77	1.4	2.86	0.121	1.55	0.1	-1.29
-1.65	-1.22	1.09	2.37	1.57	0.781	-0.764		1.14	0.628	2.85	-0.662	0.631	2.58	-1		-1.62	1.54	5.84	0.439	2.63	-1.79	-1.09
-1.98	-0.597	1.33	0.0134	0.516	0.916	-0.255		0.656	0.704	3.63	-0.921	0.585	3.31	-0.598		-2.6	2.5	1.92	0.0236	3.03	0.233	-1.44
-2.42	-0.832	1.33	0.877	-1.74	1.45	-0.0401		1.25	1.11	3.85	0.231	1.26	2.88	-0.935		-2.5	0.0422	3.44	2.58	0.84	-0.145	-1.54
-2.45	-0.566	1.61	1.65	-0.483	0.93	-1.22		0.663	0.506	4.37	-0.733	0.198	3.35	-0.528		-1.79	1.47	3.67	2.16	3.42	2.05	-0.572
-2.21	-1.43	0.776	1.84	1.01	0.807	-2.54		1.07	-0.000267	3.1	-0.403	1.35	2.83	-0.521		-2.21	0.65	2.61	1.99	1.59	1.28	-1.02
-1.99	-1.99	1.58	0.815	1.28	-0.377	-2.45		-0.0128	0.0317	4.43	-2.08	1.96	2.25	0.384		-2.17	2.85	4.4	1.69	1.83	2.02	-1.49
-2.14	-1.15	0.778	1.66	0.033	0.241	-1.57		0.0775	0.436	3.2	-1.46	0.869	2.68	0.215		-3.17	2.47	1.65	0.18	1.78	-0.104	-0.521
-1.98	-1.3	2.08	0.224	0.116	2.44	-0.271		0.0988	1.54	2.6	-1.9	1.66	2.07	0.623		-2.29	2.93	1.16	2.19	1.16	0.662	-0.801
-3.57	-1.56	2.22	1.17	0.259	0.681	-0.782		0.465	1.98	2.09	1.14	1.12	4.25	0.106		-1.82	1.43	3.25	1.79	3.8	-0.0222	-0.737
-4.61	-1.89	0.361	0.653	-0.175	1.43	-1.46		0.617	1.33	4.73	-0.429	0.74	4.13	0.533		-1.36	1.71	2.17	1.11	3.24	1.61	-1.37
-4.78	-1.62	1.89	1.91	-0.93	-0.14	-1.63		-0.236	1.66	4.76	-0.87	0.246	3.8	-0.545		-1.93	4.85	3.8	1.56	2.26	1.08	-0.886
-2.79	-2.07	0.636	2.15	-0.382	0.369	-1.42		-0.458	1.18	5.77	-0.317	1.53	4.57	-0.481		-0.986	2.58	3.94	1.97	3.35	2.51	-1.4
-1.4	-1.2	-0.327	1.97	1.21	0.714	-3.34		0.48	1.42	4.25	-0.505	0.343	3.07	-0.511		-1.71	2.46	2.6	2.55	0.724	1.51	-2.97
-2.43	-0.335	1.44	-0.26	-0.859	0.564	-2.57		-0.187	0.739	4.22	-2.32	0.434	3.68	-0.161		-2.72	0.82	2.9	3.41	2.56	0.144	-2.05
-4.28	-0.898	0.585	2.95	-1.12	0.656	-1.41		0.522	0.858	3.19	-1.31	0.888	2.86	-1.2		-1.71	1.48	1.9	0.355	2.74	1.32	-2.01
-3.87	-1.24	-1.05	2.05	0.634	0.796	-1.83		0.875	0.594	3.34	-0.252	1.37	3.23	-0.411		-2.93	5.12	1.69	1.53	3.3	0.567	-2.31
-3.67	-0.769	0.734	0.177	-0.484	1.07	-3.02		1.74	0.422	3.06	-0.914	0.564	2.52	-0.432		-2.72	2.69	0.348	2.23	4.11	0.538	-2.49
-3.24	-1.38	0.283	2.31	-0.0584	1.47	-1.69		1.63	0.61	3.51	2.61	2	3.01	0.107		-2.87	3.78	3.05	0.384	3.41	1.15	-2.54
-2.09	-1.09	1.44	1.72	-0.0124	0.581	-1.65		1.23	0.551	3.75	0.0039	1.3	3.38	-0.135		-2.94	3.3	2.78	2.53	1.89	3.93	-1.63
-2.93	-1.91	1.01	1.4	0.574	-0.312	-2.33		0.96	0.615	3.15	1.38	0.673	2.61	0.675		-3.85	1.31	0.0885	1.03	3.72	2.63	-1.59
