# Supplementary material for: Metabolic sensing in AgRP neurons integrates homeostatic state with dopamine signalling in the striatum
Source: eLife journal article supplement (doi:10.7554/elife.72668), 2022-01-12
Supplement: fig2-data1 [file Fig2I.xlsx]

## Sheet: Sheet1
NFO										CHOW										PB
0.0878	0.219	0.226	-1.04	0.107	-0.0388	2.44	-0.577			-0.481	-0.571	0.2	1.06	2.02	1.65	0.0738	-1.16			-0.683	0.722	-1.01	0.15	0.911	-0.744	0.965	-0.729
-1.58	-0.258	0.79	-1.24	0.18	-0.561	0.925	-1.68			-1.21	-1.15	0.126	1.56	2.36	0.0133	-0.439	-0.403			1.76	1.65	0.0949	0.538	0.973	-0.671	1.41	-0.635
0.824	-0.219	0.444	-1.65	0.84	0.173	1.18	-0.545			-1.12	-0.503	-0.126	1.13	0.545	-1.5	-1.41	0.485			0.945	-0.0337	-1.18	-0.0128	1.41	0.324	0.545	-0.423
0.269	0.111	0.863	-1.5	-0.531	0.0884	-0.285	0.777			-1.37	0.545	0.0445	0.717	0.62	-1.64	0.532	-0.612			-0.12	-0.148	-1.12	-0.238	0.229	0.566	1.6	-0.768
1.48	0.777	1.17	-1.61	-0.819	0.875	-0.496	-0.726			-0.919	-0.293	1.34	0.583	0.279	-3.18	-0.121	0.457			-2.71	-1.32	-0.0134	0.651	0.508	0.808	1.31	-1.73
-0.745	0.821	1.21	-1.42	-0.121	0.659	-0.658	-0.845			-0.814	1.25	0.241	1.02	1.04	-1.09	0.768	-0.945			-1.98	-0.717	-1.74	-0.716	0.854	1.37	1.64	-1.06
-0.0919	0.263	0.476	-0.788	-0.179	1.36	0.514	0.434			0.365	-0.433	0.49	0.688	1.48	-1.66	1.29	-0.782			-1.11	0.808	-1.09	-0.734	0.41	0.367	1.63	-1.58
1.26	0.886	1.73	-1.1	-0.137	1.3	0.8	-0.0277			1.22	0.173	-1.24	0.961	0.2	0.315	0.615	-0.197			0.607	-0.662	0.0257	-0.97	-0.403	-0.197	1.71	-0.785
-0.507	0.928	1.79	-1.06	0.204	0.596	0.156	-0.2			1.33	0.643	1.24	1.55	-0.345	0.129	0.723	1.38			-0.563	0.231	0.547	-1.4	-0.856	0.621	1.92	-0.859
1.58	-0.391	0.257	-0.752	-0.58	-1.25	0.713	-0.0113			0.101	-0.66	1.66	1.46	0.69	-0.364	-1.43	0.935			0.222	-0.3	0.523	-0.926	-0.635	0.756	-0.5	0.163
1.06	-0.846	-0.108	-0.763	-1.4	-0.394	-0.719	-0.357			0.765	-0.973	0.111	1.4	0.995	0.583	0.605	-0.244			-0.703	0.0965	0.574	-0.101	-0.519	0.102	-0.688	-0.58
-0.786	0.547	1.29	0.546	-0.503	-0.444	0.661	-0.27			0.351	1	1.6	1.82	-0.583	0.495	-1.08	-0.329			-0.314	2.05	0.474	0.641	0.0992	1.42	0.37	0.118
-0.963	0.662	0.372	-0.692	0.0521	-0.809	-0.246	0.0365			-0.48	1.87	0.744	2.46	-0.0566	0.131	1.79	-1.55			0.126	1.54	-0.737	1.05	-0.706	0.771	1.93	-0.605
-0.0916	0.298	-0.736	-0.873	-0.828	0.512	0.507	-0.0135			0.462	1.66	-0.000416	2.02	-1.31	0.0786	0.285	-0.424			1.02	1.85	-0.437	0.905	-0.34	1.89	0.765	-0.306
0.0212	0.947	-0.616	-0.0216	-0.459	-0.305	1.56	-0.461			-0.931	0.423	-0.43	1.23	-1.95	0.441	1.1	-1.33			-0.778	0.0497	0.337	-0.0193	-0.461	0.988	-0.0367	-0.939
-1.91	0.945	-0.81	-0.247	-0.136	0.987	0.479	-0.998			-0.0514	-0.817	-0.0169	0.929	-0.649	-0.068	-0.269	-1.47			-1.89	0.952	-0.0506	0.051	0.176	0.194	-0.751	-1.1
-1.67	-0.432	0.0826	-0.0235	0.346	-0.207	-1.8	-0.744			0.28	0.706	-1.48	1.2	0.0709	-2.17	0.56	-0.0815			-0.544	0.444	-0.021	-0.363	-0.142	-0.841	-0.543	-1.34
0.179	1.12	-1.22	-0.842	-0.858	0.935	0.553	0.438			-1.17	0.169	-2.29	1.2	1.47	-0.927	-0.19	0.119			-0.451	1.81	-0.4	-1.27	-0.196	-0.485	0.295	-1.12
0.345	1.12	-1.84	-0.604	-0.727	-0.245	-0.153	-1.26			0.142	-1.05	1.44	1.35	1.17	-0.4	0.169	-1.48			0.492	2.07	0.889	-1.76	0.288	-1.12	0.108	-0.18
-0.322	1.27	0.136	0.00882	-1.55	0.259	0.672	-0.998			0.414	-1.29	1.31	0.616	1.2	0.413	0.498	-2.21			-0.781	1.38	-2.59	-2.14	0.36	0.597	-0.479	-0.873
-2.44	1.11	1.41	0.283	-1.59	-0.292	0.912	-0.946			0.136	-1.76	0.119	1.23	0.968	0.187	-1.32	-1.93			0.165	0.201	-2	-1.5	-0.734	-0.674	0.14	-0.774
0.359	0.751	0.886	0.209	-0.847	0.0103	0.236	-0.49			0.249	-1.85	0.865	0.696	0.701	-0.0186	-0.51	-0.657			-0.202	1.63	-0.148	-1.24	-0.493	-1	-0.312	-1.41
-0.171	1.23	-0.777	0.91	0.00883	-0.874	0.978	0.0158			2.12	-0.136	0.481	-0.214	0.755	-0.138	-0.0689	0.649			-0.523	1.99	0.323	-1.34	0.157	-0.439	-0.528	-1.4
-0.159	-0.679	-0.417	-0.228	-0.765	-0.128	-0.808	-0.669			-0.103	-0.301	1.38	-0.947	0.0154	-0.0905	-1.63	-1.03			0.0274	0.95	0.0143	-2.03	-0.572	-1.09	-1.27	-1.95
-0.655	-1.82	1.9	-0.0434	-0.731	1.81	-0.743	-1.5			1.29	-1.23	0.169	-0.194	-0.0173	-0.448	-0.706	-0.198			0.209	1.72	-0.588	-0.611	-0.844	0.354	-0.8	-1.93
-0.397	-0.446	0.26	-0.104	-0.82	0.0623	0.884	-0.959			1.53	1.25	0.148	-1.14	-0.264	-0.584	0.00265	-0.0525			-0.56	0.612	-0.171	0.0312	-0.551	-1.15	-0.56	-1.62
0.438	-0.284	1.2	0.225	-0.876	-0.622	-1.31	-1.28			1.56	1.45	0.647	-1.07	0.297	0.636	-0.309	-0.262			-0.523	1.11	-2.17	0.735	0.519	-0.885	-0.38	-1.13
0.351	-0.107	0.223	-0.0302	-0.49	2.04	1.23	-0.188			0.0625	0.43	-1.17	-1.02	0.698	0.953	0.608	-0.148			-0.211	1.24	0.53	-0.222	-0.463	-0.854	-0.135	-1.48
0.824	-0.107	0.293	-0.0377	-0.71	0.571	1.11	-0.384			1.82	-0.446	1.64	-1.1	0.651	0.962	1.51	-2.16			-0.164	0.716	-0.877	0.177	-0.674	-0.0451	-0.472	-1.46
-1.5	1.87	-0.59	-0.096	-0.39	1.3	0.378	0.483			0.623	-0.462	0.287	-1.58	0.181	1.19	-0.408	-0.848			-1.4	0.574	0.56	-0.564	-0.507	-0.423	-1.15	-0.403
-0.448	0.816	0.251	0.216	-1.12	2.33	0.438	-0.0271			-0.115	0.349	-0.287	-0.626	0.506	1.23	0.717	-0.734			-0.332	-0.0135	-1.39	0.876	-0.181	-1.18	-2.79	0.357
0.00594	0.0515	0.436	0.766	-1.7	-0.308	-0.493	-0.302			-0.0734	-0.562	2.18	-0.171	0.254	0.647	-0.685	-0.00845			-0.832	-1.95	-0.0346	0.000499	0.141	-2.2	-2.15	-0.35
-0.203	-0.26	2.57	0.634	-0.957	0.172	-1.11	-1.46			0.939	-0.146	-0.353	0.333	0.567	-0.73	1.29	-0.635			0.0259	0.666	-1.67	0.553	-0.837	-0.488	-1.93	0.501
-0.723	-0.626	0.0226	0.702	-0.817	0.396	1.83	-0.798			0.403	1.72	0.243	-0.866	0.952	0.151	0.68	-0.704			0.568	-0.282	0.958	0.0205	-0.801	-0.557	-2.1	-0.421
-0.0165	-0.953	-0.58	-0.399	-0.851	0.606	0.968	-0.72			-1.01	-0.344	-1.6	-1.35	0.343	-1.33	0.0676	-0.414			1.31	0.00962	0.52	0.925	-2.05	-2.46	-0.736	0.374
0.724	-0.584	-0.979	-0.545	-0.563	0.917	0.0351	-0.849			-0.257	-0.354	-0.211	-0.954	0.612	0.339	-0.247	-1.56			0.000916	1.02	0.527	0.149	-1.77	-0.603	0.134	0.599
-1.22	-1.01	-1.51	-0.954	-0.387	1.34	1.47	1.38			-1.3	-0.69	0.323	-0.731	0.733	0.271	-1.31	-1.33			0.395	0.575	0.395	0.0149	-1.34	-0.601	0.705	0.71
-0.105	-1.68	-1.72	0.0188	-0.923	0.731	0.851	1.68			-1.23	-0.399	-1.04	-0.923	1.1	-0.13	1.03	1.25			-0.267	-1.16	2.03	0.141	-1.08	1.35	0.689	-0.67
-0.365	-1.55	0.0622	0.873	-1.56	1.23	-0.0484	2.26			-0.476	0.558	-0.5	-0.105	0.283	0.808	-2.02	-0.894			-1.46	-1.65	0.181	0.323	-1.11	0.524	0.0714	0.242
0.51	-1.78	-1.34	0.0221	-0.993	-0.00479	1.02	2.36			-0.595	0.916	0.452	0.422	0.301	0.345	0.0263	-0.83			-1.56	-0.712	0.195	-0.425	-2.28	1.22	-2.7	0.684
-0.549	-1.55	0.77	-0.815	-0.0615	0.615	2.21	2.5			-0.0684	-0.173	-0.205	-0.262	0.725	1.03	-0.805	-0.0717			-0.24	-0.214	0.0999	0.0876	-1.15	-0.339	-1.14	0.624
-0.0196	-1.32	-0.811	-1.14	0.0667	0.013	-0.145	0.756			-0.367	-0.283	1.94	-0.467	1.21	0.783	-0.2	-0.565			-1.7	0.037	-0.861	-0.0113	-1.03	0.945	1.2	1.44
-0.106	-0.65	-0.367	-1.91	0.135	0.59	0.0573	1.41			-0.581	0.356	-0.544	-0.492	0.659	-0.306	1.45	-1.05			0.54	-0.255	0.026	0.0516	-0.777	0.194	0.0964	0.19
-1.15	-1.14	-3.41	-1.57	-0.75	-1.71	-1.27	0.553			-0.779	-1.6	1.56	0.795	0.523	0.451	0.784	0.549			-0.151	-0.359	0.267	-0.445	-0.555	-0.0378	1.53	0.0188
-0.374	-1.08	-1.87	-1.68	0.365	-0.332	0.144	-1.67			-0.0233	-0.0582	-0.458	0.391	-0.0131	-0.833	-1.19	-0.204			0.125	-0.806	0.0413	-0.516	-0.274	1.03	1	-0.22
-0.487	-1.49	-0.102	-0.607	-0.193	-0.559	1.1	-1.05			-0.193	1.18	-0.428	0.658	-0.145	-0.387	-0.397	-0.548			-0.379	-1.2	0.213	-0.545	0.895	2.3	-0.556	-0.444
-1.93	-1.09	-0.748	0.0503	0.546	-0.73	-0.169	-0.668			0.514	0.995	-1.9	0.401	-0.0332	2.52	0.763	0.117			-1.26	0.96	1.02	0.165	0.588	0.352	0.573	0.273
1.07	-0.678	-0.0872	1.02	1.73	-0.392	-0.802	-0.647			0.871	0.725	-0.415	0.679	0.475	0.366	1.38	1.03			-0.811	0.803	-0.133	-0.108	0.931	-0.768	-0.32	-0.129
-0.788	-0.0652	0.607	0.0307	1.61	-0.456	-0.499	-0.332			0.526	0.462	-0.617	1.23	-0.198	0.773	-1.15	-0.577			0.01	0.35	-0.0293	0.9	0.841	-1.6	-0.456	0.471
0.145	-1.39	0.252	-0.09	1.44	-1.37	0.298	0.854			0.542	-0.753	-0.872	-0.707	-1.43	-0.718	-0.828	0.201			-0.621	-0.478	1.1	0.207	0.807	-0.517	0.0592	-0.807
0.19	-0.574	0.646	-1.23	1.19	0.706	0.49	-0.459			1.1	-0.489	-0.754	-0.445	-0.348	1.46	0.887	-0.128			-1.58	0.283	0.788	0.147	0.376	-1.35	-0.0605	-0.956
-0.158	-1.34	-0.379	-1.79	1.03	0.627	-1.37	-1.27			-0.445	0.642	-0.0379	-0.159	-1.19	0.214	-0.454	-0.312			-0.832	-0.184	0.166	-0.408	0.471	-1.97	-1.34	-0.413
-0.217	-1.21	0.0875	-1.72	-0.115	1.01	-0.284	-1.81			-0.619	-1.49	1.07	-0.163	-0.506	0.957	1.36	0.311			-0.124	0.278	0.388	-0.812	1.52	-1.53	-0.221	-0.835
0.31	-0.738	0.198	-0.757	0.503	-0.916	-0.794	-1.42			0.306	1.92	0.338	-0.308	-0.6	0.832	0.5	-0.15			-0.382	-0.722	-0.877	-0.858	1.3	-0.698	-1.14	-0.276
0.827	0.0554	-0.177	-0.244	0.32	1.44	-1.95	-0.0425			0.46	-0.841	-0.765	-0.789	-0.675	0.834	-0.223	-0.0949			-1.17	-1.32	-0.0344	-0.989	0.424	-0.33	-0.396	-0.389
1.38	0.177	-2.6	-1.02e-05	0.214	1.39	-2.08	0.414			-0.648	-0.572	-1.2	-0.454	-0.448	-0.305	-2.24	-0.577			0.501	-1.86	0.208	-1.09	0.266	-0.547	-0.165	-0.418
-2.35	0.353	0.0385	0.174	0.95	0.404	-2.28	-0.00748			-0.507	-0.123	-0.993	-1.33	-0.867	-0.113	-0.149	-0.85			0.967	-0.139	0.193	-1.82	0.0188	-0.309	-1.41	-0.442
-1.94	0.518	-0.503	-0.196	0.855	0.888	-2.06	-1.04			0.659	-2.65	-0.202	-1.53	-1.13	0.113	-0.382	0.981			1.72	-0.3	-1.76	-2.03	1.86	-0.354	-0.00314	-0.552
-0.0129	0.96	-0.84	-0.0876	-0.166	1.1	-0.799	-0.302			0.511	-0.0645	0.33	-0.709	-0.685	-0.749	-1.23	0.369			0.0122	0.0326	-0.255	-1.87	0.763	-1.19	-0.192	-1.48
0.292	0.459	-1.05	-0.847	0.74	0.353	0.168	-0.919			0.739	-0.716	-1.49	-0.823	-0.727	0.0561	0.251	0.55			-1.9	0.644	0.145	-0.879	-0.405	1.34	0.548	-1.04
0.0298	0.0107	-0.281	-0.628	0.307	-0.616	0.0715	0.84			0.73	-0.167	1.1	-0.407	-0.527	-0.936	0.918	-0.377			0.295	0.59	-1.36	-1.03	-1.01	-0.258	-0.598	-0.207
-0.45	-0.152	-1.15	-0.61	1.02	-0.737	-0.153	-1.23			0.0427	0.17	-0.707	0.393	-0.657	0.237	2.11	-1.23			1.22	-1.24	-0.341	-1.11	-0.407	0.836	-0.896	-0.242
1.62	-0.0346	-0.479	0.194	0.899	0.0425	-0.0364	0.828			0.0575	0.901	0.899	0.425	-1.41	-0.321	2.27	0.177			-0.00277	0.384	-0.958	-0.788	0.658	0.0966	-0.0443	-0.277
0.49	0.753	-1.06	0.504	0.0187	2.63	-1.03	1.2			0.933	1.37	0.0671	0.252	-1.67	-0.606	1.13	0.636			-0.593	0.0464	-1.51	0.199	-0.272	-0.59	-0.313	0.0257
1.47	0.419	-0.661	-0.0737	0.0857	-0.278	-1.16	0.0178			0.784	0.371	-1.2	0.29	-1.52	-0.445	1.9	-0.242			-0.457	-0.602	0.674	-0.114	0.222	0.924	-0.174	0.587
1.78	-0.0871	1.42	-0.419	0.892	1.61	-0.294	1.1			0.62	-0.231	0.449	0.0317	-0.786	-0.56	1.76	-0.381			2.1	-1.07	1.39	0.0419	0.619	0.321	1.05	-0.299
0.59	0.921	-0.206	-0.753	1.06	0.427	-0.248	-0.354			1.67	1.82	-1.87	-0.349	-0.411	-0.423	-0.167	0.24			-0.901	0.508	-0.506	-0.934	-0.762	-1.91	1.48	-0.118
0.171	1.3	-0.632	-0.441	0.388	-0.764	0.00743	-0.493			1.62	1.02	-0.616	-1.99	-1.08	0.138	0.0768	0.384			-0.738	-0.0317	0.167	0.255	-1.38	-2.23	1.16	-0.0486
-0.0853	0.147	0.898	-0.282	0.239	-1.02	1.18	-0.108			1.53	2.01	-2.14	-0.969	-1.64	-0.654	-1.56	2.41			-0.828	-0.0797	-0.231	0.423	-0.942	-0.871	0.304	0.757
-0.0212	-0.536	0.105	0.684	0.0904	0.159	1.35	-0.192			0.571	1.09	-0.023	-1.35	-1.27	0.285	-0.445	0.00974			0.129	-0.0581	-2.25	0.52	-1.59	0.86	0.227	1.06
1.05	0.44	-0.573	0.619	0.266	-0.355	-1.38	2.56			0.991	-0.446	-1.29	-1.01	-0.591	0.0647	0.145	0.758			3.03	-0.541	-0.305	0.114	-0.942	-0.461	-0.574	1.1
1.5	1.63	0.661	1.2	-0.94	-0.824	-0.615	1.29			2.51	-0.202	0.892	-0.631	-1.52	-0.321	-1.38	0.586			-0.386	-1.07	-1.1	0.308	-2.43	1.38	0.587	0.62
2.2	2.59	0.418	-0.228	-1.37	-0.654	-0.322	2.27			0.904	-1.36	-0.299	-1.11	-0.797	2.43	-0.607	0.637			-0.244	1.93	-0.0423	-0.59	-1.26	-0.331	-1.02	0.696
0.672	0.814	-0.811	-0.485	-0.861	1.18	-1.2	0.562			0.519	0.0457	-0.427	-1.09	-0.761	2.11	-1.14	-0.131			-0.232	0.0957	-0.361	0.108	-0.182	0.111	1.79	0.172
0.629	0.315	1.35	-0.409	-1.46	0.828	-0.715	-0.561			0.753	0.748	2.28	-0.747	-1.2	2	-1.17	0.175			0.0184	-1.03	-0.741	-0.378	0.423	0.895	0.464	1.2
1.65	0.454	0.0627	-0.16	-1.29	0.689	-0.44	-0.306			-0.287	1.24	-0.101	-1.33	-1.1	-0.413	-0.487	1.39			-0.37	-2.3	-1.29	-0.306	0.00843	1.06	0.19	1.7
0.15	-0.83	0.311	0.645	-1.65	0.99	-0.356	0.501			-1.83	-0.555	-0.152	-2.01	-1.23	0.0208	-0.552	1.87			1.55	-0.866	0.824	-0.535	-0.271	2.22	0.688	2.64
0.303	0.717	3.02	0.529	-1.68	0.298	-1.4	0.806			-1.81	-0.521	0.466	-2.09	-1.05	1.93	0.364	2.02			0.718	-0.819	-1.1	0.164	0.418	0.326	0.212	2.46
1.27	-0.126	1.19	0.928	-0.804	-0.443	0.311	1.75			0.491	1.43	-1.6	-1.33	-1.51	0.816	0.883	1.53			1.19	0.201	1.43	-0.0946	0.232	0.0834	-1.28	1.94
-0.947	1.01	1.53	0.63	-0.54	-1.96	0.896	0.634			-0.315	1.87	-0.183	-0.319	-1.59	0.841	-0.939	1.79			0.276	-1.05	1.86	1.29	2.71	-0.0166	0.233	1.32
0.871	0.621	-0.374	0.694	-1.04	-1.08	0.0314	0.666			0.195	-0.0411	-0.479	0.491	-2.39	1.94	-0.538	1.2			1.53	-1.76	0.679	2.36	1.95	0.212	0.24	1.19
-2.11	1.76	-0.547	0.277	-0.829	-0.842	-0.763	0.392			0.229	-1.97	-0.24	1.63	-1.51	-0.225	-0.987	2.09			0.528	-1.72	1.73	2.72	1.4	0.298	-0.333	1.01
0.783	2.23	-0.19	-0.0181	0.245	-2.38	-0.634	-1.13			0.463	-1.84	-0.812	0.183	-1.61	0.211	-1.46	2.1			0.827	-0.414	-0.212	2.8	1.26	2.17	0.287	1.47
1.55	1.98	0.585	0.978	0.687	-1.56	-0.948	-0.463			-1.11	-0.552	-0.967	0.206	-1	0.677	0.496	0.754			-0.651	-1.93	3.14	2.27	1.28	-0.62	-0.889	0.844
-0.65	1.57	0.757	2.08	0.813	-1.51	-0.988	-0.912			-1.43	-2.14	1.82	-0.145	-0.233	-1.36	-0.633	1.51			1.02	0.513	1.13	1.82	0.728	-0.117	1.16	1.07
1.1	-0.186	-0.986	1.81	1.72	-1.06	-1.25	-0.691			-0.854	-2.06	-0.302	-0.387	1.06	-1.46	-0.243	1.13			1.88	-1.17	0.631	1.99	1.13	1.14	1.55	-0.00587
1.11	-1.07	-0.879	1.98	0.986	-2.09	-1.13	0.468			-0.0473	-0.048	0.551	0.424	1	-1.69	0.547	0.681			0.241	-1.32	0.194	1.58	-0.203	-0.191	0.265	0.171
1.19	-2.06	-0.507	2.15	1.32	0.295	1.61	1.21			1.49	-0.831	1.83	0.728	1.46	-0.951	0.216	2.12			-0.164	-1.17	-0.675	1.76	-0.909	0.185	0.916	0.805
0.182	-1.35	0.171	1.92	0.648	1.15	0.347	-0.122			0.288	0.219	-0.275	0.844	1.41	0.428	-0.708	0.693			0.278	0.0193	0.998	-0.774	-2.01	-0.667	-0.393	1.7
0.92	-2.25	-0.243	1.56	1.72	-0.976	1.22	-1.77			0.127	0.239	-1.02	0.828	0.812	-0.811	-2.34	1.65			-0.03	-0.211	0.946	0.00402	-1.58	0.523	0.187	1.52
-1.28	-1.42	0.567	2.38	1.04	-0.538	-0.118	-0.221			-0.545	1.16	-0.798	1.6	0.516	-1.08	0.323	0.777			0.45	0.424	0.185	0.0635	-0.468	-0.492	0.528	1.58
-1.3	-0.028	-0.451	2.67	1.02	-1	-0.588	0.223			-1.73	-0.688	0.479	1.84	0.381	-0.404	1.32	1.23			-1.09	-0.809	1.84	0.639	-0.141	-0.203	1.01	0.884
0.323	0.156	0.199	2.01	0.149	-1.31	1.39	0.881			-1.67	0.131	1.08	0.545	1.03	-0.735	-0.933	-1.46			1.5	-0.856	0.315	0.658	0.184	0.269	1.09	0.678
-0.715	0.00992	0.454	1.98	-0.588	-1.78	1.53	1.9			-0.331	-0.409	1.74	0.0756	0.99	1.27	0.791	0.169			0.111	-0.192	0.954	1.46	0.942	1.18	0.985	0.0382
-0.016	-0.897	0.404	1.64	-0.653	-0.966	1.88	0.131			-1.07	0.619	0.982	-0.755	1.57	0.27	0.304	0.132			1.55	-0.494	0.274	0.889	1.61	-1.14	-1.1	0.557
-2.13	-0.435	0.171	1.27	0.484	-1.91	-0.42	0.536			0.714	0.365	-0.227	-0.659	1.27	-0.596	-0.512	-0.387			1.19	-0.625	2.69	0.19	1.11	-0.146	-0.322	0.604
-0.493	-0.591	0.361	0.178	2.83	0.0424	0.272	0.679			-1.34	0.455	-0.632	-0.704	0.754	-0.0749	-0.564	-0.161			1.25	0.461	-0.125	1.3	1.15	1.75	0.701	1.48
-1.67	-0.406	-0.384	-0.145	2.91	-0.331	-0.89	1.07			-2.02	0.296	-0.32	-1.3	0.705	-1.15	2.45	-0.903			1.94	0.0471	0.817	0.563	1.15	0.201	-1.07	1.89
0.63	-0.134	-1.28	-0.263	1.59	0.455	1.17	1.08			-2.22	1.1	-1.43	-0.47	0.724	0.455	0.0492	-0.572			-0.343	1.31	0.183	0.538	1.08	1.8	-1.08	0.988
0.0387	0.984	0.886	0.255	2	-0.562	-0.00257	0.146			-2.31	-0.154	-0.247	0.169	1.11	-1.03	-0.0921	-0.956			1.6	0.679	-0.729	0.707	1.33	-0.00487	-0.986	-0.51
0.244	0.861	-0.616	-0.23	2.03	-0.713	-0.812	0.398			-1.78	0.37	0.643	0.0454	0.767	-2.36	0.478	-0.694			0.679	0.961	-0.174	0.392	1.81	1.25	-0.784	-0.796
1.63	-0.869	-1.95	-0.693	2.12	-0.47	0.241	-0.117			-0.925	0.258	0.304	0.504	0.727	-2.21	1.77	0.0201			1.1	-1	1.32	0.302	1.56	1.26	-0.14	-0.353
-1.37	-0.967	-1.93	-1.47	2.16	1.85	-1.01	-0.565			-0.0238	0.314	-0.528	0.31	0.641	0.589	1.11	-0.636			0.154	-0.392	1.21	0.661	0.964	0.56	0.441	0.621
-2.47	-0.655	-0.191	-2.29	2.8	-0.463	-1.6	-0.35			-0.0811	0.745	0.0539	-1.17	1.52	0.136	1.86	-0.932			0.295	1.12	0.18	-0.147	0.193	-0.925	1.31	0.0969
-0.734	-0.0229	-1.23	-1.38	2.58	-1.58	-2.26	-0.76			-0.291	-0.184	-0.48	-1.01	-0.301	-0.507	1.84	-3.27			0.415	0.166	-0.0129	1.41	-0.11	-1.44	0.731	-0.219
0.713	0.177	-0.539	-1.1	2.18	-0.68	-1.07	-0.787			0.192	0.127	-0.81	-1.92	-0.978	-0.594	-0.978	-1.1			0.651	0.151	-0.977	0.555	-0.0452	-0.33	0.867	-0.63
0.546	0.829	-1.02	-0.853	1.64	-1.43	0.389	-0.123			-0.61	1.05	0.45	-1.56	-0.384	-0.0666	-0.424	-1.67			2.29	0.871	-0.797	0.772	-0.525	-0.842	1.67	-0.73
0.615	-0.662	-1.18	-0.984	0.413	-1.19	-0.27	-1.24			-1.27	-0.167	0.123	-1.35	-0.803	0.0169	-1.24	-0.874			-0.947	0.306	-1.06	0.803	0.479	-1.08	-1.18	-1.02
-2.38	-1.52	-0.342	-0.539	-1.37	-0.49	1.66	-0.693			-2.15	1.28	-0.194	-1.45	-1.07	0.369	-1.42	0.373			-1.67	0.807	0.177	0.73	0.113	1.11	-0.325	-0.935
-1.33	-1.99	-0.656	-0.946	-1.36	-0.273	0.023	-0.948			-0.707	-0.854	-0.0931	-0.61	-0.351	-1	-1	-0.0429			1.83	0.107	0.843	0.514	0.481	0.191	0.72	-1.69
0.792	-1.53	-0.159	-1.69	-1.01	-0.754	0.562	0.269			-0.0304	0.629	0.616	-1.32	-0.0286	-1.07	-0.398	-0.776			-0.322	-0.222	0.262	0.00049	0.0124	-0.469	0.111	-1.73
1.77	-1.99	-0.506	-1.11	-2.21	-0.747	0.141	1.04			-0.121	0.621	-1.79	-1.4	0.231	0.572	0.697	-1.15			-0.354	0.0888	0.968	-0.501	1.42	-1.03	-1.09	-0.741
-0.476	-1.56	-1.17	-0.627	-1.63	-0.639	-0.471	0.273			-1.39	1.03	0.00177	-1.7	0.211	-0.118	-1.64	-1.12			-0.529	-0.559	-0.045	-0.762	2.06	-1.07	-0.523	-0.541
-2.16	-1.17	0.777	0.0541	-1.4	-0.842	1.09	0.235			-0.673	-0.0718	-1.08	-1.46	-0.0129	0.147	-0.408	-0.351			0.586	0.426	-1.53	-0.0911	3.29	-0.868	0.44	-0.694
-0.73	-1.16	-0.439	0.551	-2.41	-0.67	0.225	0.34			-1.02	1.4	0.764	-0.563	0.234	1.57	-1.49	-1.16			-0.0756	-1.37	-0.782	0.0213	2.28	-0.544	-0.152	0.164
-0.257	-1.94	1.81	-0.892	-2.49	-1.13	1.77	0.0602			-0.294	0.386	0.411	-0.214	0.523	0.734	-0.341	-0.504			-0.791	-1.82	0.0615	-0.327	2.65	-0.61	0.212	-0.287
-0.936	-1.51	-0.689	-0.411	-2.43	-2.19	0.396	0.139			0.278	0.781	0.671	-1.75	0.448	0.719	0.34	0.993			0.5	-0.652	-1.17	0.65	3.71	1.19	-0.27	-0.696
0.871	-1.35	-1.16	-1.8	-0.617	-1.27	-0.176	-0.537			-0.303	0.326	-1.08	-2.16	-0.018	-0.728	-0.914	-0.75			-0.328	-0.0691	0.116	0.647	3.62	-0.425	1.95	-1.01
-0.11	-1.42	-0.13	-1.29	-0.349	-1.55	-0.807	-0.286			-0.319	1.55	-1.59	-2.07	-0.0643	1.25	0.877	-1.19			-0.623	1.29	-0.000341	0.227	3.49	1.25	-1.29	-0.967
-0.0281	-1.8	-1.69	-0.478	0.107	0.211	-1.97	-0.111			-0.619	0.479	0.803	-1.69	0.531	0.333	0.472	-1.51			-1.86	-1.06	-1.21	-0.0537	2.94	0.213	-0.52	-0.997
0.622	-2.48	-1.13	-0.406	-0.546	-2	-0.985	-0.0709			-0.658	2.17	0.218	-1.35	0.566	-2.04	-1.12	-1.91			-0.063	0.246	-1.52	0.488	2.48	2.46	-1.66	-0.408
0.0342	-2.06	-0.0841	-0.958	-0.557	0.127	-1.17	-0.66			-1.16	2.56	0.125	-1.92	1.58	-2.42	-0.393	-0.563			-0.776	-0.363	-1.42	-0.351	3.08	1.94	-2.34	0.52
-1.67	-1.91	-1.89	-0.681	-0.9	-0.766	-0.165	-0.727			-0.0107	1.74	-0.229	-2.16	2.38	-0.144	-0.483	-0.985			-0.247	0.00371	-0.933	0.525	1.77	1.07	-0.976	0.307
0.174	-1.11	-0.455	-0.892	-0.798	-0.535	-0.744	-0.315			-0.298	1.02	1.02	-2.33	0.769	-0.634	-0.556	-1.12			-2.67	0.781	-1.25	0.401	-0.0746	0.888	-0.785	-0.804
-0.933	-2.41	0.118	-1.19	-0.559	-0.353	-1.1	0.511			-0.231	1.61	-0.362	-2.38	1.61	-0.754	0.0979	0.253			0.208	-1.19	-0.145	0.749	0.4	0.986	-0.264	-1.58
0.292	-1.25	-0.971	-0.561	-0.45	-0.498	0.287	-0.477			0.0806	1.35	0.546	-2.74	0.526	-1.18	-1.06	-0.866			0.0601	-0.562	1.03	0.96	0.123	-1.08	-1.38	-1.14
-0.63	-1.59	-0.53	-0.238	-0.18	-2.03	-1.22	0.144			1.26	1.78	-2.77	-1.69	1.14	-1.48	-0.24	-0.704			0.514	-0.961	0.41	0.64	-0.882	-0.948	-0.508	-0.264
0.242	-0.799	-1.13	0.17	0.797	-1.72	0.456	-0.479			-0.143	0.0944	-1.28	-1.81	1	-0.615	1.39	-1.54			-0.637	-0.425	-1.5	1.31	0.0856	0.0841	-0.632	-0.444
-0.648	-1.01	-1.27	0.033	0.987	-3.45	0.535	-0.0915			0.32	0.126	-1.07	-1.37	0.939	0.204	1.19	0.142			-0.836	-0.768	1.82	1.77	0.261	0.669	-0.997	-0.486
-0.00851	-1	-1.61	0.112	-0.286	-1.69	0.205	0.378			0.666	0.188	1.24	-0.209	1.46	-0.431	-0.515	0.831			-0.937	-0.739	0.907	1.1	0.813	0.366	0.655	0.428
-0.499	-1.06	-0.967	0.54	-0.308	-1.4	-0.531	1.45			-0.137	-0.303	0.38	0.17	-0.136	-0.026	-1.78	0.626			-0.598	1.32	1.11	1.64	0.929	0.816	-0.933	0.522
-1.78	-0.0538	0.788	0.731	0.19	-0.842	-1.7	0.302			0.272	0.493	2.12	-0.728	-1.31	-0.398	-0.684	0.103			-0.141	0.0839	-0.265	1.73	1.3	0.708	-0.159	-0.491
1.38	0.497	-1.33	1.16	-0.0294	0.786	-1.69	-0.0297			0.615	0.534	1.46	-0.982	-1.88	-0.903	-2.36	-1.02			-0.366	0.319	2.01	1.23	1.4	1.15	-2.28	-0.657
0.358	0.466	0.404	1.14	-0.412	2.47	-0.811	0.519			0.0333	0.525	-1.18	-0.766	-1.97	-1.13	-2.41	-0.948			-0.471	0.3	0.537	1.27	1.78	0.372	-0.404	-1.04
0.753	-0.282	-0.297	1.4	-0.0619	0.444	-1.12	0.603			-0.635	-0.132	0.398	0.12	-1.51	-0.655	-0.81	-1.27			-0.856	-0.473	1.52	0.354	1.44	0.382	0.837	0.129
0.231	0.0842	-0.265	1.04	0.462	0.642	-1.84	0.18			-0.307	-0.88	-0.698	-0.344	-0.861	-1.27	0.48	-0.0908			-0.0194	-1.69	0.354	0.758	1.27	0.0543	-0.329	-0.0723
-1.12	-1.7	0.467	0.855	-0.423	0.962	-1.84	0.509			-0.0779	-0.578	-1.2	1.36	-0.597	-1.37	-1.06	0.697			0.7	-0.711	1.8	0.598	0.491	0.991	0.621	-0.355
-0.0533	-0.547	0.435	0.694	-1.03	-0.398	1.19	1.31			-0.382	0.148	1.75	0.494	-0.637	0.894	-1.27	-0.879			-0.834	-1.12	1.38	0.997	0.213	0.0293	-0.634	-0.0648
-2.47	-0.101	-1.97	0.893	-0.422	1.27	-0.435	0.8			-0.842	1	0.642	0.181	-0.987	0.553	-0.0514	-0.0652			0.151	-0.477	0.0576	0.236	0.128	-0.323	-0.671	-1.15
-0.207	0.0797	-0.307	1.01	0.164	0.978	-0.0622	0.449			0.675	0.582	-0.365	-0.216	-1.12	0.119	-1.93	-0.295			-0.902	-0.166	0.238	0.291	0.539	-1.17	-0.74	-1.61
-0.951	0.163	0.913	0.781	0.262	0.917	-1.24	-1.6			-0.0134	-0.843	-1.11	0.0347	-0.00745	0.379	-2.25	0.311			-1.53	-0.486	1	0.674	0.115	1.06	-0.484	-1.18
-0.702	0.433	-1.93	0.614	0.793	0.0345	-0.363	-1.42			0.98	-0.659	0.639	0.375	0.128	-0.34	-1.85	-0.427			-1.01	-0.0536	0.153	0.695	0.567	-1.95	-1.33	-0.674
-1.11	0.77	-2.7	1.11	0.427	1.1	-0.0232	-1.13			0.025	1.71	1.64	0.615	-0.381	-2.8	0.238	0.35			-2.25	-0.824	0.496	0.0958	0.839	-0.471	-1.28	-0.348
-2.16	-0.459	-0.923	0.955	0.68	1.1	-0.943	-1.52			1.23	0.37	1.77	0.384	-0.288	-2.1	-2.05	0.0673			-1.2	-0.32	-1.37	0.25	0.0455	-0.41	-1.26	-1.09
-0.0838	-0.265	0.519	1.08	0.581	1.7	-1.21	-0.101			0.751	0.208	0.1	0.549	-0.262	-0.494	-0.685	0.45			-0.958	-1.11	0.669	-0.315	0.0673	0.661	-1.13	-0.897
-0.571	-0.454	0.379	0.355	0.191	0.815	-0.971	1.21			0.305	-0.644	1.37	-0.47	0.024	-1.82	-0.373	-0.744			-0.958	-0.157	-0.631	-0.176	0.873	-0.563	-0.759	-0.955
-3.86	0.262	0.365	0.549	0.204	0.882	-0.863	-0.8			-0.0525	-0.466	0.323	0.69	-0.293	-2.51	-1.29	2.48			-1.03	0.192	-0.897	0.298	0.772	-1.86	-0.124	-1.53
-2.56	0.567	-0.0754	1.01	-0.00618	0.484	-1.03	-0.394			-0.273	1.18	2.11	1.12	0.169	-1.29	0.134	1.16			-0.713	0.613	0.752	-0.255	0.432	-0.956	-0.0357	-0.67
-1.28	-0.141	1.19	0.753	0.279	-0.503	-0.556	-0.559			1.04	-0.228	0.694	1.06	-0.198	-1.73	-2.9	2			-1.66	0.469	0.146	-0.129	0.64	-1.5	-0.868	-1.02
-1.1	-0.214	-0.497	0.0628	-0.465	0.189	-0.747	-1.02			0.169	-0.612	1.21	1.54	0.0449	-1.76	-0.941	0.911			-0.117	0.339	-1.08	0.357	0.678	-1.7	-1.45	-1.07
-1.01	-0.952	0.0376	-0.501	-1.39	2.2	-0.383	-1.79			0.289	-1.64	2.35	0.49	-0.501	-1.51	-0.419	1.21			-1.25	-0.524	-1.19	0.723	0.553	-1.77	0.262	-0.598
-1.29	-2.18	0.132	-1.14	-1.04	2.04	-0.752	-1.22			-0.947	-1.29	2.29	0.568	-0.377	-1.29	-0.73	0.58			-1.8	0.335	0.864	0.577	0.139	-1.59	-0.773	-1.49
-0.552	-0.907	0.636	-1.44	-1.47	0.338	0.177	-0.76			-0.911	0.00103	0.0625	1.21	-0.503	-1.71	-0.742	2.34			-1.88	-0.501	1.76	0.515	0.403	-2.1	0.102	-1.61
-1.7	-1.34	0.614	-1.6	-0.969	-0.146	-0.397	-1.14			-1.99	0.255	0.909	1.05	-1.03	-2.92	-1.46	1.5			-1.21	-1.03	0.924	0.367	-0.0183	-0.079	-1.37	-2.23
-2.6	-1.03	1.38	-2.21	-0.678	0.153	-0.833	-1.21			-3.08	-0.943	-0.305	0.3	-0.74	-0.63	-1.57	1.48			-1.38	-0.414	-2.02	0.801	0.348	-0.396	-1.26	-1.15
-1.82	-1.22	0.212	-2.54	0.201	-0.348	0.66	-0.433			-1.64	0.0249	-0.993	0.147	-0.869	-1.13	-2.12	1.8			0.473	0.489	1.31	1.87	0.0462	-1.52	-0.356	-0.795
-1.65	-2.53	0.972	-1.58	-0.325	-2.2	0.092	-0.77			-0.0778	0.442	-0.697	0.0671	-0.691	-2.71	-1.71	1.67			0.557	-0.452	-0.52	2.26	-0.0319	-1.82	-0.889	-0.314
-2.35	-1.44	1.38	-1.63	-0.999	0.982	-0.0365	-0.00037			-0.457	0.719	-0.951	-0.117	-1.18	-0.446	-0.926	1.54			-0.216	0.114	2.18	1.68	0.0124	-1.32	-1.03	-1.15
-2.36	-1.78	0.469	-1.96	0.309	-0.492	1.52	-1.88			-0.424	1.08	1.69	0.824	-1.97	-1.83	-0.97	0.818			0.0352	-0.00248	-0.774	0.481	-0.738	-1.54	-1.39	-0.76
-1.52	-1.39	1.61	-1.27	0.495	1.42	0.356	-2.38			-0.301	0.0897	0.956	1.8	-1.78	-1.8	-2.7	-0.632			1.32	0.397	-1.66	1.61	-1.61	-3.3	0.49	-0.359
-1.83	-1.43	1.5	-0.714	0.697	-0.404	-0.818	-0.841			-0.153	0.607	-0.519	1.45	-1.04	-1.28	-1.61	0.0684			0.0284	0.113	-0.38	0.764	-1.65	-0.919	-0.65	-0.479
-0.159	-1.46	0.0215	-1.48	-0.24	1.03	0.923	0.44			-0.754	0.977	1.08	0.585	-0.707	-0.712	0.743	0.206			-0.22	0.372	-0.203	-0.183	-1.64	-1.64	0.423	-0.856
-0.922	-1.67	0.00472	-0.956	-0.693	0.82	-0.0885	-0.29			-0.248	0.736	0.546	1.31	-1.03	-0.169	-0.932	1.54			-0.196	0.532	-0.322	-0.577	-0.849	-1.84	-1.1	-0.549
-1.72	-1.61	0.259	-0.488	0.226	2.34	-0.393	0.2			0.206	0.649	0.185	2.61	-1.06	-1.12	-0.0347	1.1			0.592	0.615	-0.84	-0.946	-2.13	-1.25	-2.06	-0.739
-1.7	-1.27	1.02	0.664	0.057	2.96	-0.386	0.421			-0.351	1.51	0.337	1.43	-1.89	-0.899	0.126	0.561			-2.44	0.579	-0.829	-0.731	-1.47	-1.75	0.287	-1.34
-1.1	-0.744	0.488	-0.224	0.645	1.81	-0.00445	0.822			-0.614	0.0122	-0.34	1.16	-1.42	-1.74	-2.24	1.07			-0.785	1.24	-2.46	-1.07	-1.77	-1.01	-0.561	-1.64
-2	-0.125	-0.271	-0.423	-0.296	-0.726	-0.399	0.302			-0.346	0.117	-0.0542	0.17	-1.08	-2.3	0.148	0.33			0.789	1.57	-1.07	-0.52	-2.14	-1.13	-0.462	-1.38
-1.69	-0.913	-0.423	-0.0885	1.65	1.31	-0.614	1.36			0.108	0.92	0.393	0.271	0.038	-0.558	0.61	1.07			0.744	2.19	-0.386	-0.00641	-2.3	-1.19	-0.652	-1.12
-2.46	-0.477	-0.769	-0.13	1.08	2.51	-1.68	1.56			-0.304	-1.44	-0.513	0.534	0.292	-1.79	-0.61	1.11			0.134	0.715	0.0516	-0.0099	-1.66	-3.29	-0.167	-1.67
-2.41	0.221	-1.88	0.577	1.27	1.01	-1.42	1.27			-0.282	-0.801	1.52	0.737	0.999	-0.515	-0.803	1.58			0.245	-0.0123	0.812	-0.567	-1.46	-2.29	-0.246	-1.33
-1.27	-0.67	-0.994	0.175	0.723	1.27	0.057	0.641			-0.0973	-0.123	-0.803	0.846	1.28	-2.41	-0.231	2.38			1.92	0.495	0.0662	-0.534	-1.02	-0.671	0.356	-0.891
-0.945	-0.736	0.353	-0.0967	-0.112	0.861	-1.34	1.16			-0.726	-1.11	0.334	0.729	1.16	-3.32	-0.739	3.22			1.02	1.98	-0.364	-0.489	-2.04	-2.37	-1.24	-0.692
-1.25	-0.899	0.841	-0.368	0.246	0.14	1.76	-0.813			-0.493	-1.56	-1.01	1.55	1.21	-0.0461	-0.531	3.51			1	1.11	-0.168	-0.832	-2.3	-1.01	-2.19	-1.11
-1.34	-1.02	-1.17	-1.34	-0.0195	0.975	-1.41	-0.923			-0.451	0.556	0.643	1.45	1.68	-0.894	0.21	0.583			-0.251	2.32	-0.0459	-0.0349	-1.9	-1.77	-2.09	-0.119
-0.165	0.536	-0.64	-0.874	-1.72	-0.0757	0.259	0.577			-0.0579	0.681	1.17	0.568	0.636	-1.13	-1.19	0.917			2.37	1.29	0.52	-0.125	-2.14	-0.12	-0.532	-0.314
-0.164	0.125	1.84	-2.01	-1.43	0.42	-1.51	-0.108			-0.898	1.3	-1.34	0.179	0.886	-1.94	-0.0625	0.708			1.35	1.05	0.995	1.05	-1.49	0.253	-2.45	-0.544
-0.714	0.409	0.348	-0.851	-1.07	-0.845	-0.438	-0.244			1.01	1.02	1.14	0.699	0.0792	-1.54	0.5	0.866			1.96	1.56	-1.87	1.36	-1.78	-0.497	-0.429	-1.15
-0.641	0.323	1.13	-1.64	-1.58	-0.48	-0.199	0.148			-0.106	1.17	-0.715	0.565	-0.744	-1.56	-2.03	0.881			0.29	0.74	-1.28	0.642	-2.52	-2.37	-1.27	-1.46
-1.18	0.554	-0.145	-1.42	-1.63	0.396	0.163	-0.667			0.102	0.228	0.042	-0.0997	-0.431	-0.539	-0.929	1.75			-0.0492	0.8	-0.3	1.43	-1.49	-2.17	-1.87	-1.58
-0.167	-0.0405	1.33	-1.44	-1.25	-1.23	-2.9	-1.56			-1.26	0.558	-1.9	0.58	-0.192	-1.32	-1.1	2.39			-0.136	0.635	-0.544	2.25	-1.13	-2.02	-0.707	-0.756
-2.48	0.256	-1.38	-1.16	-0.704	-0.356	-0.783	-0.846			-0.422	-0.439	2.46	0.218	-1.79	-1.73	-0.942	1.6			0.162	2.53	0.581	2.79	-1.17	-2.05	0.418	-0.897
-1.27	-0.0323	0.103	-1.49	-1.13	1.57	-0.68	0.108			-1.33	0.0416	1.09	-0.0599	-1.8	-0.221	-0.811	1.91			0.0103	0.946	-0.622	0.989	0.59	-3.46	-0.524	-0.645
-3.56	-1.02	1.86	-1.81	-0.673	1.08	-0.815	-0.337			-0.151	-0.422	2.28	-0.702	-1.33	-0.845	-1.47	1.62			0.903	1.36	-0.952	0.84	0.976	-1.44	-0.499	-0.418
-0.68	0.0455	-1.11	-1.64	-0.772	1	-1.55	-1.82			-1.77	1.32	-0.505	-0.271	-0.866	-0.757	-1.41	1.33			0.654	0.699	-0.858	0.2	1.35	0.7	-0.576	-0.296
-2.51	0.19	-0.419	-1.68	-1.38	1.81	-0.6	-1.15			-0.908	0.437	1.51	-1.17	-0.165	-3.67	-1.78	0.818			1.45	0.537	-0.94	0.272	1.38	-1.18	1.97	1.22
-0.827	-0.109	0.793	-1.67	-1.58	1.99	-1.05	-1.27			-0.0518	-0.311	0.586	-1.07	0.257	-1.14	-0.589	1.19			1.46	0.0382	-1.23	-0.595	1.06	0.641	0.732	1.86
-1.24	0.754	-0.118	-1.45	-0.421	3.17	-1.53	-1.71			0.425	-1.11	-1.62	-1.66	0.107	-0.111	-2.41	0.985			0.322	0.54	-0.847	0.0882	1.49	0.444	0.965	1.65
-1.37	0.731	2.51	-1.51	0.206	1.34	1.35	-1.19			-0.775	-0.544	-0.809	-1.52	0.347	-2.11	-1.16	0.876			0.944	0.861	-0.835	-0.508	1.59	-0.915	0.665	1.63
0.592	0.545	-0.273	-1.5	0.492	1.76	-0.33	-1.66			-1.63	0.00401	-2.12	-1.78	0.141	-1.06	-0.434	-0.412			1.08	2.33	-1.31	-0.722	2.63	-0.233	0.0631	1.59
-1.3	-0.311	2.84	-1.65	-0.104	2.08	-0.242	-1.24			-0.856	-0.243	-0.963	-1.3	-0.0365	-1.4	1.08	0.0899			3.25	1.12	0.527	-0.391	2.24	0.665	0.571	1.46
0.495	0.508	0.242	-1.45	-0.65	1.35	-1.05	-0.243			-0.435	0.29	-0.188	-0.717	-0.985	-0.592	-0.445	-0.151			0.434	0.921	1.07	0.21	1.35	-0.696	0.202	0.347
-1.5	1.28	0.509	-1.54	-0.415	3.14	-2.87	-0.000595			-0.713	0.527	-0.619	-0.503	-0.973	-1.05	-2.05	1.3			2.95	1.63	0.0713	-0.829	2.08	-1.67	1.56	0.586
-1.82	1.18	1.09	-1.95	-0.287	2.73	-1.23	-0.196			-0.452	1.32	1.06	-0.0624	-0.559	-0.838	-1.98	1.89			0.897	2.12	0.322	0.357	1.2	-0.567	-0.555	0.373
-1.62	1.08	0.846	-1.48	-0.586	1.43	-3.07	-0.809			-0.509	0.452	1.63	0.205	-1.12	0.493	-0.552	-0.0252			-0.174	2.02	0.955	0.557	1.8	0.996	-1.66	1.02
-2.51	0.141	0.716	-1.26	-0.361	0.487	-1.42	-0.513			-0.648	1.34	-0.852	1.13	-0.756	-1.35	-0.532	0.808			-0.53	1.92	0.597	-0.385	2.14	1.21	-1.34	1.53
0.0689	1.32	1.97	-1.15	-0.683	3.07	0.892	-0.775			-0.0117	1.79	4.05	-0.00196	-0.862	-0.846	-0.576	0.869			-0.239	1.84	1.47	-0.609	0.789	1.46	-0.277	1.25
1.24	1.16	0.72	0.0159	-0.389	3.53	-0.581	-1.86			-0.497	1.66	2.54	0.498	-1.55	-2.59	-1.31	0.00454			2.15	0.938	1.73	-1.69	1.03	1.79	-1.32	1.75
-1.37	0.8	1.75	0.479	0.111	1.37	0.559	-0.867			-0.774	2.3	1.91	0.772	-1.66	-0.174	-1.19	-0.237			1.52	0.183	-0.0473	-1.23	0.196	2.01	0.454	1.91
-1.23	1.2	0.204	0.193	0.263	1.9	-2.21	-1.32			-1.78	1.34	0.611	-0.408	-1.65	-0.305	-0.739	1.99			1.32	0.491	-0.278	-0.585	-0.0187	-0.226	-0.56	2.01
-3.09	1.79	1.06	0.4	0.54	2	-0.903	0.0476			-0.598	-0.904	2.23	-0.918	-2.08	-0.0989	-1.88	1.95			1.67	0.604	-0.714	-0.164	0.165	2.59	0.263	1.89
-0.828	0.764	2.03	0.278	1.58	2.79	-1.17	0.122			-1.18	-0.149	0.15	-1.8	-2.18	0.696	-0.866	1.58			2.52	-0.285	0.317	0.0326	0.2	2.34	0.619	1.07
-1.82	0.349	2.05	-0.152	1.79	1.81	-1.63	0.325			-1.27	-1.28	0.954	-2.13	-1.63	0.57	-2.45	1.18			1.21	1.02	0.673	-0.449	0.242	1.84	0.969	1.06
-1.12	-0.768	1.93	0.0802	2.22	3.17	0.18	0.298			-0.599	-1.06	2.74	-1.52	-1.39	-0.609	-1.82	1.3			1.31	0.389	0.0911	-0.592	0.73	2.92	1.78	1.1
-0.619	0.42	3.85	-0.0624	2.96	1.99	-0.0232	0.0208			0.883	-0.267	0.212	-0.695	-0.813	-0.706	-0.625	2.95			1.15	0.102	0.825	-1.48	1.76	2.02	1.07	0.185
-0.574	-0.244	3.63	-0.0882	3.65	2.93	-0.414	-0.0744			0.857	-1.94	-0.65	-0.111	-0.204	0.106	-0.0485	1.82			1.64	0.313	-0.0747	-1.54	1.76	1.83	2.49	0.972
-0.761	0.244	6.25	0.0154	2.74	0.725	0.666	-0.238			1.14	-1.76	1.84	0.148	-0.313	1.66	0.547	2.79			2.92	0.693	0.0899	-1.72	1.07	3.11	2.82	0.784
-2.97	-0.0577	2.65	-0.415	1.68	-0.0109	0.0822	0.274			0.951	-1.44	2.36	-0.154	-0.906	1.09	0.924	2.8			1.76	0.256	0.215	-1.99	-0.309	1.92	3.11	1.13
1.21	0.562	4.09	-0.46	1.61	0.36	1.4	1.94			1.86	-1.36	4.11	-0.905	-0.79	-0.858	0.858	3.38			2.63	0.874	1.17	-2.48	0.389	1.72	3.61	0.809
0.159	-0.926	4.5	-0.0551	1.85	1.45	1.27	0.358			1.43	-1.52	4.35	-1.37	-0.193	0.905	0.894	2.86			3.72	0.989	-0.55	-2.33	0.197	2.42	2.94	0.667
0.81	-0.329	3.98	1.01	0.334	1.47	1.53	1.13			1.2	-1.88	4.11	-0.993	-0.679	-0.57	3.3	2.69			3.84	0.154	0.165	-2.76	-0.685	2.63	3.34	1.39
-0.659	-0.788	2.76	1.43	0.243	2.21	2.19	1.7			2.19	-0.166	3.43	0.0961	-0.33	1.02	1.22	3.48			4.13	0.205	-0.438	-2.39	0.19	4.74	1.68	0.187
0.615	-1.97	3.97	0.912	0.143	1.36	3.75	0.933			1.53	-0.734	4.13	0.614	-0.577	0.996	2.41	3.32			3	0.725	0.0667	-3.22	0.163	1.83	1.45	0.218
-0.0323	-1.22	5.06	0.881	1.51	2.6	3.14	0.777			0.704	-0.661	4.94	0.773	-0.558	0.802	1.89	4.57			2.73	0.217	-2.24	-3.59	-0.652	3.37	2.63	0.618
1.5	-2.17	6.46	0.835	2.24	0.186	4.2	0.355			1.17	-0.357	2.62	1.56	-0.864	0.831	2.33	4.96			4.01	0.051	-1.06	-4.15	0.16	1.81	2.15	0.961
0.918	-2.79	3.93	0.687	1.6	3.42	2.34	1.04			0.592	0.0112	3.56	1.92	-1.16	0.643	1.7	7.04			3.37	1.53	0.0274	-3.54	0.554	0.963	1.02	0.412
1.31	-2.86	3.53	1.26	1.89	3.6	2.02	0.858			1.16	0.403	4.45	0.762	-0.334	1.79	2.28	5.09			3.33	1.14	0.728	-3.64	1.07	2.56	2.11	0.674
-0.277	-0.789	1.87	1.13	1.75	2.08	3.08	1.56			0.455	1.19	3.37	0.571	-0.786	0.972	2.07	4.8			4.16	1.3	0.678	-3.97	0.0891	1.8	2.78	-0.215
-0.931	-1.71	4.68	0.456	2.88	2.46	1.98	0.457			-1.15	0.218	5.97	1.14	-0.428	1.33	1.73	5.51			4.54	2.47	1.44	-3.29	0.998	2.01	2.72	0.773
1.22	-2.77	4.88	1.56	2.33	3.22	3.22	1.28			-0.125	1.13	3.9	1.68	-0.579	1.37	2.09	5.49			4.79	2.41	1.65	-2.45	1.11	0.511	2.98	0.459
1.8	-1.07	5.21	1.06	2.27	2.25	1.22	1.43			0.558	0.744	1.18	1.07	-0.0203	1.18	2.58	5.68			3.97	2.45	1.33	-1.17	0.483	0.929	3.44	0.847
1.61	-2	2.6	1.13	3.2	3.26	3.42	1.35			1.42	0.415	2.25	0.545	0.203	1.59	1.2	5.16			4.98	3.11	2.73	-0.0313	0.55	1.94	2.34	-0.0605
2.28	-0.83	5.7	1.39	3.9	3	0.807	-0.734			1.47	0.822	1.06	-0.359	0.576	1.45	2.44	5.44			3.74	2.71	2.01	-0.353	2.35	0.714	2.78	-0.0148
0.111	-1.11	4.63	1.84	3.04	1.83	1.87	0.366			1.22	-0.0808	4.55	0.652	0.74	0.42	1.35	5.84			5.49	2.04	1.93	0.368	3.37	0.545	2.48	0.276
0.746	-1.15	2.66	0.815	4.27	1.5	3.02	0.101			2.1	0.702	3.5	0.543	0.879	0.11	1.51	5.91			4.85	1.24	1.05	1.18	3.68	1.07	2.78	0.0998
-0.856	-2.04	2.82	0.61	4.09	3.53	1.52	0.195			2.59	-0.869	3.52	0.234	1.05	0.622	0.552	6.79			4.53	1.59	0.849	0.0243	5.53	2.14	1.73	-0.765
2.12	-1.48	2.57	0.867	4	1.33	2.3	0.488			2.68	0.709	3.99	1.21	2.08	1.14	2.65	5.57			3.25	1.73	2.97	0.203	7.22	1.48	2.29	0.866
-0.0377	-2.01	2.15	0.494	5.32	1.88	0.644	0.54			1.9	0.556	3.47	0.994	2.63	0.647	0.637	3.8			5.08	2.63	1.78	0.47	7.31	2.16	2.83	0.586
-1.36	-1.16	0.969	-0.23	6.16	3.71	0.254	1.33			2.48	-0.238	2.61	0.543	3.07	0.302	2.11	1.52			4.73	2.03	-0.035	-1.2	9.33	0.254	1.53	1.59
0.632	-1.42	3.77	0.039	5.79	3.71	1.03	1.57			2.3	0.449	4.08	0.689	1.97	-0.976	0.439	1.73			6.35	1.97	1.13	0.293	7.16	1.71	3.06	0.527
-0.0237	-2.17	1.73	0.461	5.75	1.76	-0.0742	1.33			2.57	1.07	4.8	0.948	2.91	-0.392	0.423	2.95			4.93	1.08	-0.191	0.259	6.7	1.19	3.39	1.03
0.339	-2.02	3.96	0.761	4.39	1.98	2.03	0.307			2.24	1.33	3.68	1.35	3.62	-1.29	1.21	3.75			5.61	2.15	0.495	2.22	5.89	2.37	3.99	0.278
1.24	-1.75	2.56	1.1	4.98	1.35	0.385	0.041			2.05	1.96	3.74	1.59	3.61	1.02	1.2	3.8			6.78	1.89	0.607	1.19	7.33	1.35	3.51	1.03
0.564	-2.11	3.5	0.841	5.11	0.0215	2.25	-0.106			2.59	1.62	4.41	0.87	2.98	1.6	1.17	4.37			5.94	1.03	2.7	1.75	6.77	1.58	1.81	0.739
1.82	-2.27	4.44	0.997	4.42	0.491	0.575	0.383			1.02	2.74	4.66	-0.111	2.24	0.695	0.643	4.14			5.05	2.39	1.29	2.33	7.93	3.18	3.18	0.233
0.111	-2.39	0.543	0.59	4.62	1.06	0.373	0.663			1.19	0.366	4.38	1.24	2.29	-0.42	2.46	3.99			4.89	0.635	1.67	3.05	7.79	0.974	2.62	1.9
-1.62	-1.95	3.18	0.0942	4.24	0.451	1.27	0.839			3.45	1.94	4.84	1.74	2.25	-0.034	3.14	2.52			5.03	3.86	1.54	4.12	8.64	2.03	3.4	1.6
0.405	-2.01	3.26	0.404	4.26	0.262	1.99	1.12			2.61	1.27	2.79	1.06	2.66	-0.104	4.11	3.88			4.86	2.92	0.0823	5.38	8.52	1.24	4.84	0.932
0.429	-1.33	3.85	0.535	5.84	-1.02	1.77	-0.353			2.39	2.06	3.26	1.59	1.92	0.92	1.16	4.85			7.36	2.6	-0.0397	5.3	8.73	1.31	4.07	0.807
-0.171	-2.33	1.67	0.065	6	1.05	1.82	0.371			3	-0.542	4.14	2.09	2.28	-0.343	3	5.01			6.21	1.19	0.469	6.12	8.26	2.26	3.73	0.335
-1.1	-1.98	1.09	-0.22	5.69	-0.0234	2.2	-0.495			1.39	-0.547	7.07	1.89	2.58	-0.504	0.84	5.03			5.97	1.12	0.22	5.88	7.39	1.48	1.89	-0.164
-1.03	-2.26	2.29	0.464	6.46	1.37	0.135	-1.18			1.12	0.138	5.52	2.07	1.58	-1.7	0.054	4.47			7.37	2.56	0.376	5.42	7.46	2.59	2.73	0.112
0.271	-0.598	0.401	0.353	6.66	0.947	1.18	-0.304			1.86	0.0129	5	1.85	2.4	0.535	2.21	5.09			5.76	2.27	-0.411	5.9	6.19	1.92	3.39	0.93
-1.19	0.0126	3.37	0.0974	5.72	0.946	1.36	-0.0295			2.01	-0.699	4.15	1.74	1.79	-0.0984	3.86	2.41			7.72	1.59	0.815	5.17	5.95	0.459	2.74	1.61
-1.95	1.09	2.56	0.235	5.21	-1.56	1.81	2.27			2.14	0.273	2.28	2.82	1.44	-0.668	1.41	3.28			6.49	0.766	1.22	4.66	6.24	1.47	1.62	2.49
-0.473	0.447	2.64	0.647	5	0.0797	1.49	1.06			2.43	0.0512	3.71	2.85	1.8	-1	2.16	2.28			5.72	2.1	-0.41	3.98	7.61	2.32	2.85	3.1
-1.48	-0.28	3.48	1.46	4.79	0.716	2.46	-0.365			1.37	1.12	2.97	3.31	2.37	-1.09	1.43	1.35			7.14	0.631	1.1	4.14	7.51	1.96	3.66	3.75
-0.963	-1.9	3.82	0.544	4.36	0.713	2.62	-0.976			1.48	0.437	3.69	2.41	2.16	1.02	1.93	2.13			6.9	0.813	1.71	2.82	7.28	1	2.59	4.94
0.6	-1.18	3.61	1.15	4.4	0.999	1.49	-0.228			2.49	0.949	2.11	2.49	2.43	1.22	2.22	1.47			7.7	-0.061	3.13	3.5	7.62	1.36	2.74	4.34
0.0718	-1.67	4.84	0.68	3.06	1.86	1.21	1.32			3.04	1.48	2.09	2.39	2.31	-0.0349	2.37	2.26			7.73	-0.571	1.61	4.49	8.58	1.56	3.62	4.63
-1.42	-1.35	4.23	0.949	3.19	2.15	2.09	0.832			2.89	0.909	2.1	0.417	2.27	1.52	1.1	3.27			6.8	1.12	0.848	3.81	8.1	1.06	2.95	4.66
-1.04	-0.841	3.44	0.896	4.52	1.8	1.54	1.33			2.8	-1.06	3.13	0.423	2.46	1.68	0.996	3.8			6.81	1.67	1.48	4.19	7.45	2.59	2.56	4.01
-2.11	-2.11	3.47	0.916	5.29	0.0377	3.05	1.25			2.38	0.186	3.02	0.196	2.05	1.5	1.64	2.86			7.62	0.289	0.36	4.68	6.2	0.821	2.06	3.51
-0.323	-2.26	3.16	1.34	5.07	0.984	2.42	0.875			2.89	1.09	4.39	0.117	2.04	0.643	1.11	1.33			8.11	0.246	-0.628	4.55	5.59	0.277	3.65	3.51
0.325	-1.1	3.4	0.979	5.65	2.64	2.34	-0.209			1.64	1.03	2.58	-0.148	2.36	1	1.15	2.74			7.24	0.131	1.5	4.54	4.74	1.58	3.44	3.67
-1.68	-0.0208	3.66	0.436	4.98	1.29	3.84	-0.37			1.76	-0.335	4.27	1.11	2.99	1.35	0.841	2.22			7.28	0.613	0.0117	3.25	4.36	1.73	3.2	3.24
0.31	-0.279	2.69	0.896	3.6	2.81	3.05	-0.687			2.38	1.49	3.64	2.15	2.57	0.481	0.179	3.26			7.18	0.302	0.75	2.09	5.08	1.25	4.03	3.71
-2.04	-0.24	3.89	0.268	4.86	2.38	2.73	-0.468			2.04	-0.117	2.15	1.36	1.94	0.347	1.13	2.06			8.23	2.03	0.373	2.35	3.3	-0.547	2.12	3.64
0.398	0.581	1.96	-0.124	4.61	1.4	2.45	0.602			1.94	0.222	4.15	2.59	2.18	1.53	-0.827	3.06			7.63	1.9	-0.664	2.07	4.58	0.108	2.83	3.03
-0.445	0.958	2.01	-0.477	4.44	0.795	0.478	0.168			1.58	1.04	2.29	1.62	1.99	1.27	0.0215	2.37			7.83	0.932	0.0611	2.02	5.3	2.03	2.81	3.62
0.496	0.346	2.38	0.142	4.34	-0.796	2.51	-1.32			1.31	1.05	5.52	1.34	2.29	0.222	-0.648	2.06			7.97	1.53	1.08	2.97	6.21	-0.0539	2.75	3.6
1.15	-0.029	-0.522	0.903	3.3	3.2	1.82	-0.726			2.24	-0.398	2.81	1.5	2.41	0.937	2.27	1.56			6.94	1.93	-1.1	2.38	4.68	2.14	3.7	2.87
1.05	0.715	2.34	0.834	1.79	2.18	3.52	-0.848			2.25	-0.0649	5.17	0.0245	2.36	-0.255	-0.103	2.43			7.39	2.03	0.952	1.16	5.87	2.45	2.48	3.07
-1.68	0.43	2.49	0.723	1.95	1.18	1.82	-0.944			1.73	-0.886	1.67	-0.522	2.43	0.0162	1.17	3.85			8.24	2.57	0.469	3.25	5.81	1.1	2.99	2.47
1.88	0.116	1.89	0.262	3.64	0.213	1.86	-0.7			2.41	-0.881	1.43	0.363	2.39	-0.818	-0.137	2.93			8.33	2.14	-0.142	3.68	4.77	0.679	3.78	2.89
0.123	-0.0058	2.61	0.737	3.66	-0.399	1.75	0.423			3.52	-0.441	1.63	0.0299	1.94	-0.111	1.36	3.93			7.38	2	1.43	4.7	4.62	-0.245	1.74	3.59
-1.17	0.573	3.51	0.191	3.2	0.142	2.51	-0.168			1.59	-0.117	3.69	-0.0119	1.58	-1.2	0.958	2.5			6.66	2.1	0.037	3.54	5.48	2.73	3.08	3.06
1.57	-0.342	1.33	-0.0215	2.94	-1.36	3.13	0.371			1.82	0.642	2.88	-0.805	0.951	-2.42	1.22	3.87			8.98	1.19	2.04	4.98	5.13	1.6	2.72	4.1
-0.288	-1.07	2.3	0.501	3.86	0.403	2.01	-0.527			2.3	0.278	3.35	-0.802	1.23	-1.83	1.14	2.16			8.1	1.41	0.893	3.62	6.33	2.03	2.08	3.73
-0.784	0.287	1.84	0.708	3.8	-0.364	1.89	-0.822			1.49	1.4	3.63	0.811	1.41	-1.52	0.00202	2.61			7.72	1.67	0.47	4.29	6.25	1.62	2.36	4.02
-1.07	1.38	3.09	0.523	3.66	-0.249	1.19	0.192			0.809	-0.256	3.2	0.424	1.36	-1.82	1.34	2.18			7.99	2	2.72	3.44	5.76	2.07	2.53	3.67
0.238	1.37	1.86	0.456	2.75	-0.759	3.24	-0.152			1.51	-0.363	1.74	0.32	1.2	-2.54	-0.743	1.54			7.35	1.23	1.87	3.64	5.7	0.548	3.55	4
-0.615	-0.161	1.16	0.152	2.26	3.35	3.73	0.151			0.554	-0.205	1.92	0.415	2.01	-2.04	-0.109	2.21			7.51	2.45	0.781	3.68	4.61	1.01	3.74	4.45
-2.75	0.699	1.17	0.262	2.88	2.05	1.19	-0.0829			1.45	1.17	1.69	-0.203	1.23	0.0138	1.87	1.52			9.12	1.91	3.16	3.5	4.77	0.893	1.64	4.36
0.579	0.509	2.34	0.452	2.85	2.06	1.21	-0.267			1.67	1.69	1.1	0.0297	0.968	0.947	0.0506	1.85			9.34	0.615	2.22	3.8	5.22	0.961	3.47	3.26
-0.135	0.166	2.72	0.518	2.7	3.13	1.45	0.23			2.05	1.58	3.15	0.83	0.652	0.669	0.812	2.4			9.64	1.5	1.67	4.11	3.97	2.09	1.01	3.35
1.21	0.317	2.09	0.971	2.88	2.09	1.18	-0.923			1.13	0.699	2.82	2.55	0.632	0.535	0.51	1.74			6.93	1.32	2.07	5.33	5.23	0.322	3.09	2.79
-1.36	0.849	0.897	0.991	2.88	1.69	2.94	-0.493			1.94	0.375	4.09	3.39	0.242	-1.37	2.09	2.15			6.57	2.6	2.31	4.86	3.59	1.63	2.8	2.55
-1.48	-0.266	-0.281	1.2	3.23	2.69	2.3	0.352			1.16	-0.356	2.3	5	1.07	0.138	1.45	2.04			7.82	2.13	0.529	5.36	3.46	2.17	1.67	3.21
-2.97	0.761	1.62	0.966	3.15	2.38	1.28	-0.144			2.71	-0.18	0.45	4.07	1.01	0.00506	0.664	2.27			7.5	1.87	1.05	4.63	3.53	2.18	3.62	3.75
-0.691	1.54	1.89	1.14	3.7	0.503	2.61	-0.525			1.79	-0.319	0.439	2.66	0.471	0.765	1.24	2.75			7.84	0.97	0.664	4.12	3.28	0.685	3.92	3.68
-0.596	0.996	0.373	-0.0236	3.29	3.4	1.36	0.558			1.81	0.131	2.73	2.44	0.268	1.96	1.13	3.27			6.45	1.55	2.04	3.19	4.94	0.447	1.62	3.81
0.548	1.66	0.0408	-0.0378	3.29	2.27	0.462	-0.166			1.51	0.783	2.67	2.51	-0.255	0.737	0.159	2.51			6.93	2.69	2.99	4.03	4.23	2.61	3.45	3.7
0.586	0.625	1.39	0.0275	4.75	2.34	0.659	0.188			1.67	1.56	3.77	3.14	-0.401	-0.0535	-0.0292	3.88			6.19	1.26	2.19	3.6	4.25	1.59	3.26	3.64
-0.161	-0.384	-1.06	-0.043	3.9	2.36	3.08	0.691			1.92	0.213	2.79	3.81	0.776	1.08	-0.91	3.2			6.66	1.79	0.728	3.3	4.43	2.88	3.17	3.77
-0.133	-0.495	2.62	-0.0453	4.06	3.16	0.965	-0.954			1.52	0.902	4.22	3.86	0.764	0.355	-0.981	2.7			8.45	0.687	0.243	3.39	4.57	0.341	2.93	4.5
-0.586	-0.141	2.1	0.208	3.85	0.606	1.07	-1.04			2.04	0.116	3.2	2.83	-0.0806	0.292	-0.489	3.32			6.68	2.34	0.425	3.3	3.86	1.23	2.78	4.32
0.444	-0.506	2.49	0.484	3.55	0.977	1.85	-0.0207			2.26	-0.136	1.9	1.94	0.00761	1.47	-1.03	3.38			7.38	1.06	1.01	2.82	3.68	1.65	3.82	3.1
-2.13	0.357	2.87	0.0489	3.94	1.93	1.7	1.49			2.76	0.149	2.82	2.39	-0.121	0.756	-0.481	3.08			7.02	1.53	1.58	3.73	3.03	0.793	2.35	2.6
0.305	0.379	1.27	0.166	3.7	1.95	1.12	-0.155			1.98	0.727	2.41	1.46	-0.581	-1.34	-0.156	4.07			7.33	1.29	2.49	2.27	5.06	-1.05	3.42	3.85
0.279	-0.532	2.48	0.612	3.29	1.62	2.18	-0.197			1.78	1.33	2.38	1.35	-0.101	-0.5	-1.07	4.31			8.24	2.24	1.77	1.66	3.65	-0.694	5.27	3.4
-0.145	-0.478	0.401	0.248	2.17	1.76	2.85	-0.44			1.7	0.223	2.93	1.41	0.407	0.552	0.112	2.52			6.01	0.731	1.84	2.24	4.68	-0.837	3.33	3.26
-1.97	0.0054	1.15	0.553	1.6	0.182	-0.782	-0.285			1.69	-1.16	1.69	0.988	0.599	0.864	-0.21	4.13			7.39	2.45	1.17	1.58	4.36	0.479	3.31	3.73
-2.45	0.168	0.209	0.164	1.92	1.38	1.22	-1.46			1.41	-1.76	3.54	0.251	-0.145	0.4	-0.901	5.14			7.95	3.05	1.1	2.45	4.24	1.94	2.09	3.43
-2.36	0.191	1.88	0.354	2.13	2	0.707	-0.544			1.93	-1.73	3.18	1.77	0.33	1.52	-0.0711	3.19			8.99	1.37	0.847	2.53	4.91	2	2.03	3.65
-1.01	-0.922	2.59	0.325	1.66	1.19	2.63	-0.114			1.67	-0.675	3.16	1.73	-0.268	0.512	-0.175	2.67			7.72	0.0973	0.661	2.65	4.71	1.12	2.83	3.59
0.116	-0.557	1.87	0.795	2.45	1.55	2.06	0.669			2.38	0.204	2.97	1.56	0.454	-0.61	0.94	1.12			8.03	1.68	2.19	2.94	4.12	1.15	4.08	2.67
-0.126	0.11	2.25	1.2	2.44	2.06	1.57	-0.782			2.93	0.661	4.34	0.914	1.13	-0.223	-1.21	2.69			7.38	1.59	1.62	2.26	4.42	1.31	2.31	3.15
-0.0118	-1.08	1.83	0.828	1	0.363	0.763	-0.829			3	3.27	-1.08	2.08	1.45	-0.54	1.34	3.08			6.72	1.88	0.36	2.4	5	-0.0598	3.28	2.87
-0.892	-0.195	0.101	0.999	1.41	1.1	2.27	-0.706			2.09	1.39	3.66	2.56	1.22	0.303	-0.0282	2.21			6.77	2.49	2.79	3.32	5.53	2.35	4.34	3.27
0.45	-0.686	2.1	1.56	2.1	1.05	2.19	-0.703			0.94	2.35	2.03	0.58	0.285	0.984	-0.225	2.46			7.17	1.87	1.83	3.31	5.14	1.58	2.27	2.94
1.21	-0.373	1.46	1.23	1.87	2.41	0.938	0.873			2.73	3.75	3.31	0.745	-0.284	0.933	-0.701	3.84			7.75	3.19	-1.35	3.3	4.86	1.08	2.42	3.49
0.95	-1.52	-0.138	1.07	1.18	2.41	1.47	0.67			2.32	1.83	1.31	1.2	1.04	1.03	0.132	4.96			5.89	2.09	1.84	2.41	5.5	1.08	3.29	3.5
-0.262	-1.34	1.45	0.797	1.06	3.05	1.78	-0.262			2.68	0.304	2.66	0.554	1.14	-1.23	1.29	4.82			7.38	1.38	1.71	2.84	5.82	1.91	2.77	3.38
-1.37	-1.02	0.896	1.44	2.44	1.89	2.61	-1.27			2.3	1.09	3.27	-0.991	1.31	-0.353	-0.634	3.21			7.99	1.55	2.22	3.07	4.54	1.92	3.94	2.76
-0.242	-1.6	1.3	1.56	3.11	0.464	0.6	-1.01			1.99	0.62	1.98	0.233	1.47	1.57	-1.18	3.65			8.19	1.41	0.895	2.36	5.43	2.68	2.19	3.17
0.74	-1.04	0.28	1.58	1.84	0.99	2.29	-0.85			2.04	-1.05	2.35	1.53	0.815	1.8	0.417	4.23			7.67	2.32	1.42	2.62	4.86	1.09	2.86	3.59
-0.96	-1.91	-0.187	2.18	3.9	0.665	0.871	0.0917			2.47	0.295	3.21	1.48	0.362	-0.101	0.355	5.21			8.74	-0.14	1.6	2.29	4.74	1.65	2.59	3.77
-1.98	-1.56	0.967	1.63	3.56	-1.01	1.16	0.209			3.1	-0.281	2.35	0.557	0.268	1.47	-0.677	3.27			8.59	1.91	1.42	2.54	4.86	1.22	2.4	3.46
-1.85	-0.844	0.874	1.64	2.27	0.387	0.568	0.846			2.78	-0.774	1.22	0.583	0.678	0.756	-1.1	1.01			8.42	0.546	2.82	1.95	4.34	1.26	3.64	3.52
-1.59	-1.29	1.41	1.31	3.46	0.111	1.88	-0.207			2.33	-0.512	2.5	-0.547	0.204	1.14	0.725	0.873			6.49	2.4	1.46	2.11	5.22	1.61	2.68	3.6
-1	-1.27	0.437	0.648	4.56	0.731	1.09	-0.27			2.08	-0.283	0.829	-1.35	0.42	0.166	-0.105	1.38			6.88	2.09	0.836	2.74	4.77	2.27	1.21	3.46
-0.598	-0.67	0.00366	0.196	4.18	0.466	0.512	-0.2			1.78	-0.618	2.66	-1.26	-0.054	0.171	1.08	3.56			7.6	1.83	1.82	2.36	4.74	1.44	0.871	3.37
-0.716	-1.12	0.259	-0.232	3.78	-2.6	1.47	0.155			1.67	-0.85	1.6	-1.31	1.49	-1.22	0.048	4.01			6.66	1.75	2.45	2.49	5.53	1.28	1.83	3.87
0.328	-1.49	0.758	-0.837	3.82	0.861	-0.262	1.41			2.4	-1.2	3.95	-1.53	2.79	0.405	0.497	3.55			7.73	1.63	1.29	2.53	4.93	1.22	1.55	3.55
-0.483	-0.666	0.0389	-0.291	2.85	2.14	-2.04	1.27			1.05	-1.29	2.54	-0.637	3.41	-0.724	0.113	3.34			6.6	1.52	-1.11	2.55	3.84	2.01	1.99	3.33
0.00424	-1.61	0.998	0.167	1.53	1.4	-1.14	1.31			2.53	-0.378	1.83	0.00809	3.64	-1.03	1.29	3.25			6.25	1.36	2	1.77	3.38	2.16	2.62	3.9
-1.59	-1.3	-1.1	-0.324	2.02	-1.48	1.05	-0.221			1.76	-1.78	2.1	0.705	3.35	-2.28	1.54	2.79			5.33	2.3	1.31	2.07	3.6	0.599	2.26	3.88
-0.0199	-0.354	-0.13	-0.689	2.18	0.0716	1.49	-0.854			1.01	-0.837	3.2	1.69	1.3	-2.44	0.0894	2.57			6.6	2.37	1.84	2.59	4.06	0.716	1.61	3.06
-1.32	1.07	-0.425	-1.07	2.43	-0.246	1.29	0.244			2.24	0.148	1.3	1.54	2.58	-1.78	0.26	2.99			7.22	1.74	1.35	2.3	4.87	0.852	2.78	3.15
-0.244	0.887	0.742	-0.0303	2.25	0.833	0.893	-0.0427			1.21	-0.261	1.75	1.42	3.48	0.434	0.385	4.31			7.09	0.791	0.335	1.71	4.47	0.263	2.95	4.12
0.933	0.656	0.98	-0.381	2.96	-1.64	0.371	0.0694			1.5	-0.644	2.87	2.28	3.34	0.327	1.48	4.15			7.1	0.641	1.25	2.83	5.67	1.04	2.99	3.87
-1.4	-0.174	2.69	-0.412	2.57	-0.67	0.781	0.421			1.41	-0.0412	4.71	4.97	3.08	-0.353	0.686	3.79			7.16	1.7	0.803	2.62	5.27	1.16	1.61	3.97
-1.95	0.425	1.53	0.316	2.27	0.355	1.81	-0.454			1.65	0.715	1.58	7.21	3.47	-0.535	0.215	4.23			6.17	1.83	1.82	2.92	6.29	1.7	2.96	3.36
-0.516	0.00968	0.904	0.777	2.99	-1.4	2.16	0.0204			1.61	1.41	2.02	6.58	3.84	0.928	-0.172	3.05			7.41	2	1.06	2.91	5.9	1.47	2.62	3.56
0.353	-0.451	0.385	1.11	3.47	-1.56	0.31	-0.558			2.33	1.54	2.63	4.2	2.85	0.605	0.756	3.58			6.39	1.52	1.79	2	7.92	4.24	2.53	3.34
0.978	-0.972	1.99	0.418	3.27	-0.651	0.526	-0.425			1.84	2.12	2.44	5.94	3.22	1.2	-1.13	3.59			7.46	2.23	0.797	2.27	7.49	1.61	3.04	3.52
-0.689	-0.564	0.733	1	2.99	-0.0186	1.93	-0.419			1.91	0.437	0.763	6.29	2.71	-0.574	-0.156	4.21			6.46	2.76	-0.0761	2.79	6.92	1.99	3.54	3.35
-0.557	-0.595	-0.704	0.956	4.01	0.149	2.31	0.389			1.7	1.07	0.175	5.76	3.66	0.182	0.0903	2.94			5.68	2.06	1.52	2.08	7.99	1.89	1.5	3.41
-0.0742	-1.49	0.77	1.11	3.07	-1.23	0.244	0.956			1.21	-0.204	0.427	4.66	3.48	-0.692	-1.38	3.23			6.86	2.19	1.66	2.74	7.83	2.84	2.55	3.17
-1.12	-0.998	0.789	0.868	3.95	-1.88	1.32	-0.719			0.849	0.302	1.07	3.99	2.72	1.28	0.24	2.92			5.5	1.9	0.924	1.36	6.97	2.31	2.81	3.21
0.807	-2.37	-0.0824	0.683	2.55	-0.38	1.11	-0.908			0.127	0.193	0.282	3.84	1.02	1.6	-0.289	1.93			4.7	1.61	1.54	1.78	7.07	2.18	4.34	3.56
0.797	-3.31	1.02	1.02	1.93	-0.724	2.88	0.0958			0.0916	0.29	1.11	3.74	0.933	0.383	-0.549	1.69			5.61	2.09	1.84	1.69	6.87	4.14	2.36	2.85
1.2	-1.83	-1.18	0.799	2.32	0.267	0.758	-1			1.13	1.16	-0.264	4.51	1.19	-0.0741	1.5	0.293			5.24	1.51	1.31	2.17	6.78	1.43	4.12	3.48
-0.347	-0.952	-0.269	1.11	3.32	-0.879	1.66	-1.49			1.36	0.658	2.01	2.78	0.337	2.06	-0.229	0.206			6.39	1.37	-0.0767	1.76	6.38	2.16	3.75	3.1
-0.535	-1.22	-1.22	0.579	3.33	-0.613	-0.296	-1.02			1.93	-0.249	2.73	3.22	1.28	-0.618	0.955	0.687			5.29	1.52	0.864	1.44	5.96	1.21	3.2	3.33
-1.6	-1.85	1.13	0.834	2.16	-0.0645	0.308	-1.1			1.46	-0.456	-0.297	2.71	1.18	-0.717	-0.594	2.29			4.61	1.75	1.48	1.11	5.6	1.43	2.47	3.39
0.421	-2.32	-0.597	0.593	1.68	0.139	0.823	-0.124			1.58	1.26	1.24	3.33	1.46	-0.662	-0.436	1.72			5.25	2.74	0.896	0.774	6.31	1.44	2.83	3.79
-0.314	-2.09	-0.0624	0.616	1.61	0.475	-0.71	-0.158			1.98	-0.0357	3.83	3.33	1.2	1.37	-0.632	1.56			4.93	1.22	2.13	1.58	5.53	0.4	2.68	2.92
-1.05	-2.19	0.978	0.49	1.26	0.0337	-1.14	-0.133			1.57	0.712	1.3	3.8	1.63	0.653	0.111	1.19			3.68	2.86	2.07	1.88	5.33	2.38	3.6	2.82
0.791	-1.05	0.511	1.13	0.362	-0.293	0.489	0.696			1.34	-0.23	0.413	3.92	1.4	0.531	-0.398	0.508			5.51	1.14	2.82	1.35	5.27	3.68	2.13	3.64
0.466	-1.69	1.11	0.539	0.192	1.04	0.536	-0.122			0.447	0.551	1.38	4.17	0.633	-0.103	0.196	1.04			4	1.42	2.19	1.72	5.02	2.51	2.93	4.41
-0.29	-1.93	1.17	0.0313	1.16	1.05	1.48	-0.0739			0.178	-1.12	2.3	4.66	1.11	1.31	-0.664	1.37			5.65	1.69	0.74	2.2	5.56	1.65	3.03	3.81
-0.611	-0.858	0.451	1.04	1.2	-0.06	-0.734	-0.886			0.392	1.24	3.24	3.75	0.512	-0.373	0.394	0.697			4.63	3.39	2.12	1.87	5.34	2.71	4.64	4.49
-0.854	-1.53	2.78	1.47	0.859	0.641	-0.268	0.362			0.806	1.15	3.04	2.59	0.403	0.366	-1.87	1.08			5.34	2.25	4.18	2.97	5.89	0.992	3.24	4.59
0.784	-0.698	0.193	0.27	1.26	0.608	0.416	0.151			-0.436	-1.19	2.45	3.32	0.604	-0.186	-1.37	2.33			5.28	1.94	1.24	2.72	5.01	1.09	3.61	5.14
0.563	-0.805	1.51	0.422	1.43	3.61	0.903	-0.117			0.648	-0.0265	1.9	4.03	0.671	-0.012	-0.745	1.38			7.67	1.6	1.12	3.16	5.05	2.15	3.73	4.33
-0.123	-0.577	-0.285	0.692	0.691	1.61	2.11	-0.00521			0.63	-0.684	2.04	3.6	1.57	0.191	0.0327	1.26			5.16	1.93	0.686	3.53	5.28	2.26	4.23	4.4
-0.14	-1.57	0.576	0.744	1.34	2.14	0.461	-0.38			1.15	0.414	4.09	4.17	1.65	0.397	0.0435	0.328			6.53	1.42	-0.149	3.98	5.23	1.96	3.65	4.5
0.836	-0.224	1.74	1.01	0.523	2.43	1.46	0.232			0.588	-1.53	3.75	3.75	0.876	-0.756	-1.02	0.0505			4.51	2.94	-0.455	4.21	3.45	3.31	3.91	3.98
-0.94	-0.968	2.34	0.968	1.16	3.61	2.52	-0.43			0.0825	0.696	3.28	4.4	-0.25	0.44	-0.8	-0.218			4.55	0.819	0.304	4.14	3.7	1.8	3.15	4.44
-0.599	-0.96	1.73	0.887	1.18	2.16	2.58	0.565			-0.231	-0.144	3.94	4.08	-0.214	-0.252	-1.29	0.721			5.66	1.77	0.241	4.02	4.57	3.07	3.84	4.58
-1.22	-0.326	2.47	-0.265	1.03	2.21	1.93	1.07			0.937	1.94	1.23	4.03	0.978	0.551	-0.127	-1.14			6.11	1.55	0.646	4.66	3.46	2.64	3.52	4.25
0.237	-1.16	1.94	-0.602	0.993	2.72	0.0972	0.588			0.695	0.27	2.42	5.29	1.07	2.56	-0.0788	-0.983			4.38	2.22	1.53	3.94	4.11	1.34	3.6	4.06
0.273	-1.23	2.64	0.00303	1.15	1.97	1.21	1.07			1.36	-0.583	0.809	4.7	1.45	1.12	-1.49	1.45			4.79	1.51	1.01	3.15	4.04	1.73	4.36	3.63
0.0311	-0.713	3.06	-0.586	1.48	2.12	1.86	3			0.0331	-0.0935	3.6	5.3	1.38	-0.0668	0.012	0.666			5.24	1.61	1.73	3.58	3.5	2.43	3.7	4.19
-1.04	-2.86	1.69	-0.968	1.53	1.89	2.05	2.66			0.828	2.11	1.44	5.35	1.57	0.0482	-0.359	0.529			6.14	1.69	1.32	3.17	3.61	2.81	3.4	3.37
-1.84	-2.32	3.23	-0.86	1.02	0.363	0.907	3.36			0.0849	1.67	0.5	5.12	1.22	0.56	-0.372	0.296			5.54	1.72	2.14	2.44	4.24	1.79	3.58	3.49
-2.27	-2.84	1.67	-0.67	0.875	0.38	1.12	1.99			0.353	1.77	1.93	5.31	0.686	0.395	-1.96	0.141			3.73	2.17	1.46	3.15	3.21	3.02	3.84	4.43
-1.98	-1.77	-0.0267	-0.559	-0.0959	2.04	1.72	0.911			0.76	1.71	1.73	3.9	1.12	-1.71	-0.416	0.589			6.53	1.95	1.16	2.88	4.95	3.72	3.5	4.46
0.0658	-2.51	0.816	-0.647	-0.976	1.73	1.09	1.54			0.558	1.14	3	2.73	2.03	-1.82	-1.4	0.627			5.02	0.867	2.37	3.24	4.24	3	2.71	4.38
-2.09	-2.97	0.0814	-0.324	0.883	0.964	1.48	1.08			0.62	1.74	2.34	3.78	2.42	-1.88	-1.59	0.632			4.59	1.75	0.758	3.02	4.25	3.13	2.8	4.21
-0.786	-2.23	0.839	-1.01	1.25	3.22	-0.84	1.76			1.96	2.06	2.09	3.52	1.57	-0.468	-0.972	0.687			4.87	1.82	1.78	2.67	4.08	4.72	3.33	4.8
-0.898	-1.42	-0.67	-0.928	0.663	0.854	0.45	1.64			1.27	2.24	2.16	3.97	1.64	0.166	-0.633	0.815			6.67	0.704	2.03	2.97	4.34	4.15	2.49	4.5
-1.16	-2.01	0.724	-0.453	1.74	1.07	0.194	1.58			1.2	2.84	2.24	4.14	0.649	-0.69	-1.02	-0.457			4.45	1.92	1	2.89	5.21	4.74	3.54	4.54
-0.621	-1.38	-0.0592	-0.473	1.33	2.5	1.45	1.29			2.53	3.14	1.66	4.8	0.315	-0.598	-0.484	0.562			5.02	2.42	1.88	3.94	4.03	3.16	3.33	4.48
0.111	-0.263	0.775	-0.218	0.885	0.816	-0.263	1.86			2.54	0.743	2.35	5.71	1.67	-0.265	-1.07	0.189			4.95	1.3	0.449	2.53	5.12	3.89	2.55	4.13
-0.211	0.0152	1.43	-0.226	2.95	0.157	1.2	1.28			2.55	0.756	0.762	5.66	1.52	-0.452	-0.313	1.76			5.02	1.88	0.184	3.28	5.44	3.3	2.73	3.81
-0.307	0.232	-0.246	-0.946	3.3	0.614	0.804	1.85			3.28	1.63	1.2	4.45	0.797	-0.145	0.67	3.91			6.29	0.788	1.32	3.1	6.34	3.78	4	4.24
-2.47	0.116	0.958	-0.422	3.85	0.314	-0.574	1.85			2.36	2	2.82	3.92	0.682	-0.491	-2.07	3.66			5.2	-0.138	1.34	2.48	6.53	3.3	4.11	4.35
-1.6	-0.0815	0.599	-0.425	3.39	0.797	1.39	0.702			1.73	0.979	2.34	4.2	2.31	0.574	-0.837	1.93			4.03	2.03	0.834	2.46	7.23	4.75	3.88	4.69
-1.76	-1.49	0.984	-0.12	2.66	1.46	0.875	2.04			1.36	0.00238	2	4.46	2.08	1.72	0.0856	1.83			5.34	1.56	0.725	3.11	5.92	3.07	3.16	4.34
-0.757	-2.02	0.586	0.0912	2.06	0.768	0.1	2.21			2.27	0.732	1.5	4.08	2.25	-0.555	-1.7	-1.67			5.69	1.69	1.41	2.92	6.58	3.01	4.33	4.52
0.369	-0.605	-0.136	-0.762	2.32	0.488	1.87	2.15			1.62	1.48	1.77	4.42	2.29	-0.807	-1.13	-0.12			5.46	0.151	1.01	3.38	6.65	4.17	3.24	4.57
-0.735	-0.593	-0.296	-0.405	1.83	-0.0898	1.98	0.268			1.64	1.64	1.98	3.75	2.26	-1.63	-0.47	-0.136			5.58	2.26	1.45	4.14	6.64	3.53	2.64	4.16
-1.51	0.346	-0.0518	-1.36	2.19	1.32	2.77	0.798			1.72	0.855	2.31	3.3	2.73	-0.48	-1.76	1.8			5.04	1.15	1.53	4.3	5.87	3.12	4.32	4.47
-0.201	1.06	0.971	-1.27	2.44	0.0697	-0.477	1.22			0.857	0.354	2.18	3.75	1.78	-0.828	-0.515	1.68			4.38	1.35	-0.0436	5.56	5.24	4.3	4.36	4.63
-0.578	1.57	0.0547	-1.42	2.79	1.12	1.92	0.365			1.06	0.583	1.66	3.24	1.66	-0.425	-2.08	2.48			4.83	1.64	0.507	5.58	5.5	3.61	4.14	5.18
-0.986	1.34	1.11	-1.23	2.11	2.57	2.39	0.724			1.5	1.93	1.07	2.56	1.65	-0.382	-2.14	-0.38			4.83	1.53	1.53	5.65	5.54	2.59	3.98	5.22
-2.07	-0.861	2.69	-2.11	2	-0.449	2.39	-0.617			1.48	-0.543	4.34	2.36	2.16	-0.129	-1.83	-0.563			5.89	1.34	0.751	5.51	5.15	2.22	3.94	4.95
-1.8	2.23	1.51	-1.87	1.66	-1.12	1.18	0.642			2.07	-0.493	1.3	2.24	0.873	-1.65	-1.16	0.436			4.54	1.91	1.97	5.23	5.07	3.19	5.2	5.3
-0.981	0.716	1.57	-1.74	0.98	0.000708	1.33	0.318			1	-0.0654	0.585	1.61	1.07	-1.38	-0.0508	1.4			5.67	2.34	0.297	5.35	5.26	4.61	3.33	4.77
-0.579	1.01	0.412	-1.76	1.48	1.95	0.602	1.58			2.14	0.684	1.82	0.643	1.34	-0.568	-2.24	-0.689			6	1.77	-0.0812	4.28	5.31	3.61	3.77	3.89
-3.47	0.741	0.42	-1.02	1.33	1.98	-0.821	0.369			1.41	-0.306	0.346	0.345	0.877	-0.289	-0.886	2.51			6.21	0.766	0.43	3.8	4.76	2.88	4.5	4.81
-1.66	0.554	0.339	-0.881	2.79	1.1	-1.14	-0.0829			1.88	0.636	1.19	1.51	1.43	0.533	-0.82	1.25			5.9	2.25	0.543	2.99	6.3	5.12	4.44	5.05
-1.9	0.82	-0.296	-0.833	2.51	0.863	0.738	0.425			1.69	-1.36	1.6	0.645	1.14	0.591	-1.78	2.22			5.4	2.09	1.03	2.48	6.81	4.94	5.88	4.47
-2.54	1.01	1.23	0.0071	3.14	0.0589	1.78	0.217			1.55	0.00785	1.14	0.605	0.799	0.485	-0.27	1.28			5.01	1.93	-0.52	3.25	7.15	3.33	4.39	4.46
-0.445	1.61	1.94	-0.344	2.97	-0.0727	0.898	0.469			2.45	-0.954	2.68	0.501	1.31	0.591	-1.86	0.895			4.62	1.85	0.0287	3.2	6.6	4.29	3.75	4.21
-1.8	1.07	0.0137	0.0766	1.67	1.09	0.00785	-0.175			2.02	-1.49	2.46	0.646	1.6	-2.1	-1.96	0.0749			5.69	1.36	1.2	3.44	5.37	3.16	3.22	4.66
-1.57	-0.244	-0.58	0.812	1.34	0.381	1.35	-0.456			2.6	-1.55	2.55	0.871	1.31	-0.0811	-1.02	1.94			5.48	1.13	1.74	2.83	4.96	1.58	4.65	4.51
-1.59	1.25	1.21	0.136	1.59	1.1	0.457	0.432			2.03	-2.57	2.17	1.12	1.4	-1.52	-1.06	2.48			4.66	0.183	1.33	3.09	4.36	2.56	4.31	4.64
-0.0475	0.959	1.79	0.195	2.02	-1.72	-0.0962	0.408			0.733	-0.839	0.819	1.04	1.73	-1.31	-1.96	3.63			5.37	2.24	0.0898	3.44	3.58	4.68	4.35	4.37
-1.97	0.776	3.48	-0.139	2.68	-1.06	0.458	0.237			2.42	-0.973	1.47	1.12	1.18	0.94	-1.12	2.89			6.38	3.21	2.03	3.87	3.34	3.92	5.26	4.25
-2.04	0.699	1.04	0.137	2.02	-2.59	-0.259	0.468			1.62	-0.521	2.32	0.0946	1.28	0.492	-2.1	1.18			5.97	2.17	0.927	3.24	3.02	3.67	3.82	4.61
-2.26	-0.269	1.35	-0.00287	3.64	-1.02	0.747	0.852			2.14	0.119	0.939	-0.0273	0.85	0.414	-1.78	1.66			4.26	1.28	1.68	3.94	2.53	2.03	4.6	3.98
-0.216	-0.427	1.66	-0.269	3.25	-0.327	0.916	0.00798			1.5	-1.43	1.1	0.197	1.82	-0.322	-0.886	0.46			5.4	2.67	1.56	4.39	0.669	2.75	5.05	4.17
-0.28	-0.0636	2.01	-0.584	2.74	0.00963	0.733	1.59			2.22	-0.27	1.74	0.944	2.45	-0.605	-1.78	-0.234			4.53	1.92	1.5	4.82	3.18	4.33	3.48	4.28
-1.94	0.295	-0.223	-0.867	3.45	-0.0998	0.78	0.737			2.38	-0.046	-0.46	1.3	2.79	-0.0881	-1.14	1.56			5.32	2.4	2.76	5.25	3.46	3.56	3.37	4.34
-2	-0.488	3.62	-1.32	2.69	0.161	1.46	-0.643			2.05	-1.08	0.265	1.85	3.1	0.019	0.434	1.74			6.18	1.68	1.73	4.35	2.93	2.92	4.28	3.87
-0.61	-0.0235	2.67	-0.166	2.76	-1.75	1.72	-1.04			2.47	-1.15	2.67	1.54	3.24	-1.09	-0.961	1.15			4.68	2.23	0.221	4.65	3.67	3.68	3.23	4.15
0.86	0.422	1.1	0.583	3.18	-0.981	1.46	0.241			2.81	-0.744	-0.171	1.89	3.46	-1.85	0.304	2.56			6.33	2.75	3.16	4.76	2.55	4.04	4.02	3.94
-1.35	1.34	0.209	0.244	2.42	-0.332	1.55	-0.528			3.39	-0.702	1.9	0.887	3.27	0.95	-0.763	0.0315			5.43	0.701	1.59	4.5	3.01	4.88	4.01	3.67
-1.04	0.597	2.52	-0.14	2.1	-0.668	1.79	-0.846			1.97	-1.39	1.55	1.8	3.03	-0.378	-3.33	0.87			5.24	1.32	2.61	4.38	3.47	3.95	6.03	4.24
-3.98	1.06	0.804	-0.04	2.41	-0.948	0.47	-1.44			3.64	-0.297	0.551	1.5	2.92	-0.223	-2.59	0.581			5.47	1.81	0.831	4.32	3.76	3.77	5.1	4.08
-2.94	0.763	0.25	-0.347	2.3	1.34	-0.0163	-1.59			3.13	-0.531	2.29	0.686	3.14	-1.7	-2.17	0.412			5.53	2.41	1.1	3.71	3.26	3.57	4.01	3.98
-1.33	1.19	-0.389	0.425	3.09	1.17	1.2	-1.28			3.7	-0.232	1.45	1.02	2.83	-1.32	-1.54	0.518			5.07	2.77	0.763	4.29	2.02	4.85	5.2	3.56
-0.734	0.388	2.03	1.24	2.11	0.249	0.528	0.54			2.85	-0.282	0.919	1.75	2.65	-1.22	-0.511	-0.0434			5.55	1.95	1.73	4.73	0.991	4.14	6.14	3.95
0.817	0.51	0.361	1.79	1.13	-0.884	1.87	-0.184			2.8	-1.46	2.53	1.41	2.81	-1.24	-1.06	-0.732			2.95	2.47	0.322	5.17	1.68	2.83	3.69	4.12
-2.79	-0.106	-0.267	0.938	3.06	-1.13	-0.285	-1.8			1.54	-0.626	0.277	1.39	1.68	-0.811	-2.06	-0.198			6.48	2.75	1.17	5.69	2.04	3.72	4.4	3.12
-2.35	-1.06	0.413	0.966	2.45	1.65	-0.619	-0.512			2.2	-0.582	0.16	0.486	0.797	-1.62	-2.27	0.956			4.35	1.85	1.41	5.3	2.35	4	4.19	3.55
-1.92	-0.591	3.08	1.3	0.831	-0.352	-0.833	-0.384			3.33	-1.82	1.89	0.0811	0.996	0.141	-0.692	0.721			5.72	0.827	3.41	5.27	2.88	3.93	3.88	2.87
0.159	-0.152	1.31	1.08	0.0463	1.14	-0.0096	-0.812			3.16	-0.696	-2.26	1.08	1.23	-0.747	-1.86	-0.0157			6.41	0.996	2.22	5.03	1.97	2.35	5.18	3.7
-2.45	-0.195	0.77	0.0971	-0.883	-0.649	1.43	1.2			2.15	-1.26	-0.526	1.07	1.62	-0.844	-2.34	1.02			4.51	2.49	3.4	4.72	1.92	2.19	5.69	3.82
-1.42	-0.323	2.75	0.372	-0.992	0.592	0.358	0.996			2.44	-1.27	-0.629	1.19	2.27	-1.96	-2.59	1.25			5.65	1.9	2.41	5.19	2.05	4.17	4.11	2.59
-3.01	-0.177	-0.714	0.436	-1.18	0.333	1.34	0.725			3.03	-0.621	0.433	1.03	2.6	-0.43	-1.77	-0.398			4.92	0.839	0.757	4.12	1.14	4.25	5.86	3.35
-1.56	-0.137	0.615	0.242	-0.0189	-0.684	2.36	-1.37			2.74	-0.164	-0.624	-0.353	2.66	0.856	-2.6	-1.42			6.52	1.4	1.51	3.72	1.54	3.98	4.81	4.13
-3.99	-0.353	0.982	0.124	-0.999	-1.74	0.19	-0.799			2.84	-0.177	1.08	0.937	1.72	-0.524	-2.4	-0.405			5.56	1.37	2.65	2.32	1.06	3.1	5.01	3.63
-1.36	-0.681	-0.169	0.935	-1.39	-0.891	0.645	0.109			2.71	-1.32	0.273	0.688	1.44	0.055	-1.41	-1.23			3.4	2.55	3.18	1.2	2.25	4.19	3.19	3.25
-1.97	-1.56	0.228	2.47	-1.05	-3.09	0.304	0.558			2.68	-0.953	1.02	1.23	2.02	-0.537	-2.61	-0.265			5.75	1.45	2.52	3.12	1.73	5.15	3.91	4.06
1.82	-1.33	-0.141	2.34	-1.11	-3.62	1.56	-0.851			2.34	-1.4	0.339	1.12	1.36	-1.73	-4.06	-0.136			5.73	1.18	2.32	3.27	2.24	4.18	4.49	3.98
-0.919	0.467	-0.443	2.12	-1.31	-1.08	1.5	0.0968			3.84	-2.09	1.92	1.42	1.53	-1.33	-2.17	1.07			6.51	2.17	0.371	3.04	3.18	3.21	5.39	3.69
-1.55	-1	-1.02	3.2	-0.282	-0.825	0.117	-0.169			3.52	-1.24	0.233	1.15	2.78	-0.0588	-2.01	1.19			5.55	2.08	0.511	4.17	2.74	1.93	5.22	3.5
-1.82	0.644	0.904	3.94	0.595	-0.679	0.173	-2.38			2.55	-2.82	2.62	1.75	3.5	-0.2	-2.72	-0.659			6.55	1.33	-0.192	4.35	3.99	3.78	5.04	3.6
-1.03	0.631	-1.06	4.26	0.886	0.0897	0.757	-1.25			4.62	-1.22	1.94	2.18	3.33	-1.76	-1.99	-0.895			5.37	2.13	0.429	4.4	3.24	3.09	4.33	4.15
-1.39	-0.0989	-0.144	4.01	-0.651	0.351	-0.43	-0.564			3.26	-1.23	2.11	1.82	3.36	-1.91	-3.77	-1.93			5.76	1.61	2.95	3.39	1.85	3.08	4.51	4.41
0.292	0.295	-1.34	3.57	-0.541	-0.503	-1.4	-0.115			2.78	-0.347	1.15	1.99	2.3	-1.11	-3	0.686			5.16	2.14	0.798	1.83	1.89	4.04	4.47	3.3
0.0679	-0.318	0.743	3.48	-0.603	0.579	0.527	-0.532			2.72	-1.4	0.012	1.76	2.61	-0.404	-3.88	-0.0103			6.01	2.19	2.55	0.863	1.9	4.15	3.56	3.47
0.68	-0.515	1.23	3.41	-0.733	-0.871	-0.089	0.365			3.21	-1.41	3.08	2.07	1.39	-1.77	-2.3	0.2			4.9	2.11	1.77	1.92	3.03	3.93	4.37	3.51
-1.68	0.528	1.1	3.15	0.267	0.24	1.95	0.797			4.23	-0.32	2.78	2.38	3.02	0.415	-2.7	2.1			5.02	2.08	2.7	2.23	3.07	3.84	2.86	3.23
1.38	-1.18	0.718	2.99	0.557	1.69	1.05	0.411			4.61	-0.341	2.94	2.62	4.36	0.244	-1.54	1.21			5.64	1.8	2.08	1.83	3.12	4.39	4.95	2.98
-1.12	0.369	-1.44	2.49	0.0694	0.162	0.28	0.11			2.78	0.0258	1.56	3.55	4.55	-0.297	-1.54	1.44			6.87	1.55	2.84	2.98	3.15	3.96	3.82	4.34
-0.45	-0.527	0.883	3.1	-0.454	1.13	0.448	0.388			3.64	-0.493	2.11	1.01	3.95	-0.223	-1.18	-0.31			6.46	2.01	2.6	2.1	3.53	3.94	4.55	3.91
-1.21	0.545	-0.506	2.5	-1.4	0.463	-0.466	-0.16			3.37	1.04	2.4	1.22	3.51	-1.15	-2.24	-0.954			5.57	2.47	1.61	3.1	2.46	2.79	5.21	3
-1.76	-0.747	-0.979	2.5	-0.648	1.65	1.35	-0.548			1.79	-0.0984	2.03	1.62	3.16	-0.687	-1.61	-0.482			4.77	2.5	2.4	3.49	2.84	3.66	4.92	4.03
0.0118	-0.187	0.963	3.17	-0.0578	0.229	1.56	-0.739			2.81	0.937	2.22	2	3.21	-2.21	-3.15	-0.0443			6.4	2.03	4.38	4.23	2.8	3.12	4.42	4.09
-2.2	0.398	-0.0742	2.24	-0.037	0.465	-0.461	-0.941			3.6	-1.5	1.66	2.84	2.97	-0.939	-2.9	-1.54			6.56	1.6	1.38	4.78	2.92	3.97	5.18	4.06
-0.628	0.171	0.974	2	-1.08	0.664	1.94	-0.796			3.65	0.221	2.45	2.85	3.45	-0.949	-2.84	-0.152			5.03	2.32	1.66	3.74	2.03	4.27	4.54	3.21
-2.22	-1.7	0.167	2.3	-1.06	0.227	1.09	-0.22			3.42	-0.39	2.29	2.89	2.48	0.277	-3.25	0.241			4.72	0.791	2.7	4.98	0.606	3.94	4.9	3.23
-2.33	-0.393	-0.644	3.03	-0.331	0.384	1.59	0.277			2.5	-1.65	3.83	2.8	2.76	2.09	-2.54	1.26			4.72	1.5	1.81	4.84	1.48	3.92	4.24	2.6
-0.977	0.157	-0.59	2.26	-0.678	0.988	-0.0288	-0.922			3.35	-1.52	4.16	2.51	2.34	0.421	-1.46	0.255			8.14	1.51	-0.0386	4.11	3.11	3.05	3.71	2.69
-2.53	-0.172	-0.672	2.18	-1.96	1.46	-0.152	-0.995			4.1	-0.218	1.33	2.14	2.5	-0.257	-1.73	0.334			6.96	1.85	0.345	4.12	2.36	4.03	3.47	2.87
-2.43	-0.124	0.0997	1.68	-1.42	-1.14	-0.459	-0.105			4.51	0.881	2.59	2.53	1.8	-0.73	-1.96	0.947			8.16	3.21	2.13	4.06	2.41	4.1	4.34	2.74
-1.39	-1.31	-1.3	2.37	-0.853	0.172	0.604	-0.00933			3.81	0.131	0.797	3.3	2.45	0.321	-1.49	1.77			7.62	1.52	3.43	3.45	1.88	2.93	3.35	3.16
-1.78	-0.29	0.0331	2.23	-1.87	-0.24	-0.291	-0.276			3.56	1.8	1.73	2.59	2.18	-1.08	-3.44	-0.84			6.19	2.27	2.62	3.67	1.04	3.24	3.23	2.63
-2.12	0.0883	0.723	1.62	-0.632	-1.57	1.12	-0.849			3.12	0.34	4.78	3.56	2.85	0.349	-2.41	-0.468			5.42	2.07	2.21	3.49	0.894	3.23	4.27	3.34
-1.74	-0.212	1.13	3.48	-1.12	-3.33	1.5	-0.568			3.24	-0.161	1.02	3.74	1.94	0.559	-2.66	-2.33			7.03	0.972	2.95	6.03	0.189	3.87	3.84	2.37
0.482	0.332	0.197	3.64	-0.954	-1.65	0.567	-0.279			5.44	-0.247	1.93	3.23	1.09	0.0127	-2.58	-1			6.43	1.21	2.01	2.8	-0.0648	5.56	4.26	2.63
-2.25	0.277	0.128	4.02	-0.406	-1.56	0.923	-1.02			5.66	1.77	1.94	3.24	1.42	1.1	-3.51	-0.798			5.83	1.15	3.63	2.31	-0.221	5.88	5.13	2.08
-1.91	-0.0497	-1.42	2.47	-0.919	0.219	-1.17	-0.52			3.57	0.409	2.32	3.16	1.94	-0.242	-2.7	-0.666			5.51	2.37	0.783	2.21	0.0469	4.04	5.23	1.79
-2.25	-1.19	-0.919	1.36	-0.288	0.126	-0.00777	-0.993			3.66	0.529	1.32	3.26	1.33	-0.498	-3.58	-1.01			6.16	0.269	1.76	1.85	0.845	5.33	4.41	1.8
-2.43	-1.63	0.724	1.8	0.308	-0.64	0.608	-1.21			3.31	0.913	1.09	3.29	1.24	0.773	-2.75	-0.475			6.03	1.95	2.12	1.69	0.607	4.5	3.26	1.44
-1.79	-1.03	-0.865	2.21	0.503	-1.99	2.49	-0.566			1.63	1.22	3.85	3.16	1.72	0.552	-2.7	-1.49			5.33	0.948	2.37	0.856	0.714	5.15	4.48	2.51
-0.0318	-1.36	-1.34	3.27	0.185	0.0419	-0.346	-0.867			3.07	1.23	1.08	2.35	2.61	0.931	-4.33	0.0427			7.92	1.12	1.58	2.57	1.41	5.13	3.35	1.94
-1.72	-1.32	-1.9	2.68	0.633	-1.86	0.634	-0.366			1.24	0.217	2.03	2.57	2.02	0.375	-3.74	-0.54			6.55	1.09	1.49	2.93	0.853	4.2	6.19	1.93
-1.81	-1.26	0.129	2.51	2.52	-0.144	-0.19	-0.544			2.45	0.405	3.63	2.34	1.62	0.342	-4.29	-0.688			6.52	1.73	0.899	4.23	-0.0117	3.22	2.45	1.74
-1.92	-0.0435	1.77	2.03	2.35	2.03	0.152	-1.44			2.86	1.43	4.45	2.94	1.85	-1.31	-2.77	0.0682			6.09	2.6	1.7	3.75	0.244	4.34	2.79	1.72
-2.24	-2.1	0.454	1.78	2.3	0.425	0.0378	-0.713			1.91	2	0.197	3.11	2.23	0.564	-1.85	-0.328			5.29	0.451	1	3.12	0.2	4.39	3.87	2.16
-1.64	-1.24	1.91	1.69	2.51	0.781	-1.38	-1.02			0.8	2.51	3	1.63	2.13	0.406	-2.44	0.733			5.49	0.538	2.3	4.25	0.618	5.44	2.66	2.46
-1.98	-0.308	0.216	1.74	2.38	0.617	0.826	-0.963			1.45	1.32	1.42	1.38	1.59	0.824	-3.36	0.835			5.76	1.59	2.28	4.45	0.892	4.58	3.41	2.57
-1.64	0.383	2.28	1.65	0.749	-0.779	-0.199	0.169			2.36	1.26	1.08	2.53	1.52	-1.08	-3.03	-1.32			6.07	1.9	1.76	4.88	1.66	3.42	3.17	3.1
-2.9	-0.0704	1.8	0.462	1.3	0.597	1.77	-0.817			2.62	2.04	2.59	2.76	1.37	-0.309	-2.19	-1.23			5.99	3.48	2.33	4.34	0.264	4.9	3.18	2.58
-3.6	0.606	1.56	0.301	2.43	0.788	0.0653	-1.2			1.95	2.82	2.82	2.59	1.26	1.04	-2.22	-0.828			6.67	3.55	2.58	5.58	0.488	5.51	4.22	2.72
-4.05	0.738	2.86	0.47	1.39	-1.63	-0.375	-1.12			2.02	1.96	3.12	2.35	1.17	-0.266	-2.66	-0.207			6.04	2.58	3.62	5.15	-1.05	5.39	3.3	3.13
-3.87	0.805	0.823	0.981	1.15	-0.61	0.66	-0.645			2.44	0.782	2.16	0.453	1.05	0.406	-2	0.268			5.82	2.79	4.5	4.27	-0.652	6.44	5.01	2.45
-2.44	0.845	0.501	0.814	1.89	-0.207	0.709	-0.689			2.61	0.124	2.3	1.79	1.46	0.307	-2.31	1.7			4.62	3.75	4.79	3.78	-0.849	5.76	3.61	2.97
-3.1	-0.325	-0.0607	0.822	1.96	-1.4	2.16	-1.15			3.67	0.94	2.74	1.65	0.813	0.666	-1.37	1.44			7.45	3.73	5.06	4.82	0.0759	6.21	4.59	1.81
-0.771	0.126	-0.416	0.597	2.03	-1.16	0.00575	-0.736			3.93	1.49	3.23	2.79	0.525	0.982	-2.63	0.787			5.44	3	4.32	3.92	-0.26	5.02	5.3	1.92
-4.34	-0.275	-1.74	0.897	2.43	-2.35	-1.2	0.633			3.7	1.32	3.75	1.76	-0.253	-1.4	-0.811	0.263			7.29	2.2	2.41	2.52	0.0302	5.52	4.65	2.02
-3.89	-0.333	-1.09	0.772	2.56	-1.94	0.368	-0.898			4.45	0.542	2.82	2.15	0.282	0.164	-2.49	1.71			6.82	1.19	4.56	2.33	-0.303	5.12	2.94	2.16
-3.57	-1.15	-1.36	0.473	3.02	-0.991	-0.316	-0.445			2.55	1.41	5.21	2.98	0.473	0.761	-1.05	0.908			5.94	1.72	4.25	1.31	-0.0733	5.52	3.88	1.53
-3.87	-1.77	-2.25	0.459	2.78	-1.17	0.414	-1.54			3.14	0.913	2.66	2.54	0.288	0.224	-2.4	0.753			4.5	1.64	2.83	1.94	-1.13	5.76	3.49	2.58
-1.46	-1.26	0.298	-0.178	2.95	-0.875	1.67	-0.405			1.5	0.851	1.01	2.25	0.684	-0.085	-1.94	1.08			6.64	0.531	3.5	3.73	-0.845	5.5	3.97	1.74
-3.99	-0.475	0.316	-0.105	2.6	-3.07	1.44	-0.626			4.32	2.07	1.43	3.1	0.485	0.429	-0.27	2.19			5.48	-0.145	5.02	4.04	-1.01	6.01	3.2	2.51
-4.59	-2.02	-0.87	-0.835	2.45	-0.0558	1.59	-0.203			3.32	1.81	2.9	3.1	-0.047	0.904	-2.98	2.02			7.13	0.307	3.66	4.06	-0.0634	4.88	3.58	1.96
-3.93	-0.319	-1.51	-0.285	3.03	-2.44	-0.0753	-0.82			4.06	1.13	2.9	1.59	0.953	0.727	-3.56	0.892			6.76	1.4	3.29	3.93	-0.231	3.48	2.72	1.71
-4.66	-1.27	0.287	-0.476	1.58	-3.22	1.26	0.597			2.65	1.19	3.12	1.5	1.68	-1.03	-3.84	2.87			4.68	0.453	3.58	5.17	-0.0547	3.98	2.53	2.03
-3.51	-0.996	0.256	0.183	1.35	-3.5	0.32	-1.13			3.04	-0.179	2.2	2.79	1.75	-0.905	-5.13	3.95			4.59	1.51	2.72	4.06	-0.457	4.51	1.83	2.08
-4.56	-0.638	0.98	1.07	0.0397	-2.27	1.97	0.0341			2.72	1.18	2.77	2.81	1.62	-0.728	-3.96	2.58			6.63	2.06	3.2	4.2	0.421	4.95	2.13	2.29
-2.09	-0.917	-0.0217	1.03	0.438	-2.66	2.61	-0.147			4.37	0.392	4.42	3.2	1.02	-1.27	-3.45	2.2			5.49	2.68	1.76	5.03	-0.961	6.52	2.44	2.03
-4.23	-0.733	0.394	-0.271	0.181	-3.19	0.0878	-0.365			5.2	2.43	3.66	3.1	0.902	0.0396	-3.34	2.16			5.43	2.82	2.46	5.51	-0.471	5.17	2.48	1.78
-3.43	-1.74	0.395	-1.7	0.361	-3.27	-1.32	-0.53			5.08	1.29	3.58	3.55	0.81	0.698	-3.52	2.79			5.01	1.58	0.952	4.87	-1.08	5.83	2.16	1.65
-2.21	-0.272	-1.76	-1.01	0.701	-2.07	1.33	-1.6			3.23	1.19	3.34	3.5	1.04	-0.931	-2.54	3.42			6.79	3.35	2.47	4.53	-1.08	5.11	1.78	1.97
-3.03	-0.582	0.85	-1.19	0.712	-2.57	0.583	-1.15			4.61	0.865	4.11	2.42	0.637	-0.173	-2.8	2.66			5.5	3.73	3.4	3.67	-1.24	5.45	2.4	1.39
-2.76	-0.373	-1.26	-1.68	0.779	-1.53	1.08	-0.988			4.01	1.76	4.72	2.67	0.475	0.0863	-2.08	2.15			5.56	3.35	2.68	4.08	0.103	5.78	2.8	1.63
-3.79	-0.179	0.78	-2.33	0.817	-1.43	1.9	-0.328			5.64	0.881	1.72	0.839	0.408	-1.35	-1.07	1.45			6.08	3.14	4.31	5.06	0.47	4.2	1.89	1.69
-1.97	-0.393	3.11	-2.84	0.612	-1.46	0.924	-1.29			5.07	1.41	3.43	1.73	0.86	-2.74	-2.94	-0.0229			6.2	1.83	4.6	3.2	1.14	4.87	3.09	1.68
-4.4	-0.624	0.818	-2.87	0.764	0.225	0.706	-2.27			4.46	0.27	3.28	1.47	0.578	-1.49	-2.35	1.12			5.38	0.862	4.16	2.27	0.662	4.43	3.48	1.94
-3.49	-0.617	-0.201	-2.45	0.854	-0.42	0.673	-1.75			4.97	0.789	1.07	2.31	-0.583	-1.34	-2.97	0.827			5.76	1.29	4.26	2.48	1.07	5.64	3.3	1.68
-1.68	-0.354	0.646	-2.31	1.45	-0.476	0.619	-0.74			4.25	-1.48	1.83	1.29	-0.287	-1.79	-0.821	0.681			6.18	2.56	3.02	2.96	0.488	4.49	3.33	1.84
-1.41	-0.335	-0.423	-2.13	0.987	0.959	0.801	-1.7			5.06	-0.609	3.99	2.26	0.827	-2.51	-4.29	0.71			5.05	3.84	3.6	3.35	1.42	6.52	2.97	0.757
-1.62	-0.594	-0.827	-1.3	1.93	-1.29	2.21	-2.02			4.17	-1.18	3.95	1.81	1.07	-1.15	-1.49	0.557			7.6	3.07	3.19	2.39	0.815	6.92	2.63	0.531
-0.144	-0.923	-1.93	-0.597	2.71	-1.43	0.119	-2.35			5.64	-0.124	4.63	1.82	1.06	0.0517	-3.3	2.71			6.47	1.89	4.19	1.6	1.37	6.48	0.377	0.544
-2.88	-0.87	-1.46	-0.132	3.71	-1.72	1.93	-1.73			5.67	-0.225	3.4	2.04	1.15	0.326	-1.41	2.23			5.95	1.66	3.22	1.06	0.841	4.89	1.78	0.477
-3.69	0.0334	-0.739	0.492	2.99	-0.188	0.111	-1.89			6.05	-1.59	2.85	0.132	0.393	0.536	-1.8	1.18			5.45	0.818	3.46	1.77	0.402	2.75	2.89	0.874
-3.21	-0.563	-1.66	0.467	2.01	-1.69	-0.867	0.671			4.85	-1.82	2.07	0.965	-0.18	-0.937	-2.06	0.786			4.75	-0.425	4.16	1.58	0.92	3.77	2.68	1.15
-2.54	1.12	-2.67	1.07	1.95	-1.75	-0.199	0.349			4.74	1.03	2.24	0.76	-0.438	0.372	-1.59	0.412			4.13	0.411	4.02	0.157	1.43	4.36	3.1	0.88
-1.77	0.758	-1.19	0.269	1.59	-1.59	-0.0118	-0.72			5.23	-0.794	2.63	1.4	-0.255	-0.217	-2.53	0.502			5.92	0.114	3.85	1.4	1.01	4.34	1.77	0.654
-2.04	1.14	-1.21	0.211	0.485	-1.25	-0.173	-0.115			6.03	-1.52	4.21	2.46	-0.413	0.457	-2.04	0.0262			5.19	0.423	2.9	2.48	3.84	3.86	2.36	0.806
-1.79	-0.108	-0.313	1.42	0.933	-2.16	-0.9	-0.133			5.14	-1.72	2.05	2.35	-0.409	-0.187	-1.01	1.17			4.96	-1.7	3.37	4.61	2.67	3.87	1.39	1.55
-1.85	-0.771	-1.12	1.9	0.316	-0.842	-0.142	0.181			6.51	-2.22	1.47	2.27	0.163	-0.491	-1.04	1.29			6.24	-0.884	5.24	4.67	2.83	3.74	2.57	1.64
-1.36	0.501	1.33	2.58	0.557	-2.7	0.472	2.44			4.84	-1.09	2.55	1.63	-0.115	0.539	-1.66	1.23			6.96	-0.983	3.51	3.16	2.13	3.87	3.06	1.85
-4.68	0.275	0.678	1.83	0.494	-2.17	0.435	1.35			5.17	-1.17	1.38	1.62	0.956	0.513	-0.747	2.02			5.53	-1.08	3.25	2.06	1.77	4.08	2.73	1.81
-1.11	0.362	1.77	2.02	0.271	-2.86	-1.71	1.4			4.36	-0.917	2.34	2.13	1.22	-0.335	-1.55	1.73			5.35	-0.198	4.6	3.45	1.69	2.84	2.26	1.4
0.148	0.901	0.781	1.97	0.473	-2.18	0.622	1.28			5.61	0.61	1.25	1.96	1.39	0.0391	-4.5	0.989			4.71	0.763	3.16	3.39	1.86	4.87	2.39	2.2
-0.384	-0.217	0.379	2.81	-0.089	-2.42	0.865	0.238			4.04	-0.873	1.79	1.84	1.41	-0.991	-3.55	0.136			5.68	0.653	2.48	4.02	2.89	4.51	2.2	2.01
-2.41	-0.609	0.154	3.03	-0.14	-1.31	-1.2	0.202			5.11	-1.91	0.728	0.991	2.5	-0.142	-3.76	-1.07			6.45	-1.1	4.84	4.64	2.94	2.38	2.5	2.29
-1.07	-0.17	2.16	3.19	-0.196	-2.76	0.466	0.606			6.1	-1.71	2.19	0.879	2.11	-0.79	-3.29	0.155			6.74	-1.03	4.55	4.8	2.03	5.99	0.785	1.83
-3.01	0.0846	-0.206	1.57	0.0616	-1.59	1.01	0.65			5.07	-0.248	4.73	-0.0796	1.91	-0.941	-2.84	1.28			6.81	-0.154	5.61	4.69	0.525	5.08	1.76	2.06
-3.32	-1.14	-0.702	1.79	0.0577	-2.54	0.859	0.314			4.43	-1.57	3.65	1.12	1.59	0.616	-2.84	0.78			4.72	-1.52	4.68	3.41	1.08	4.06	2.64	1.49
-0.642	-1.8	-0.411	1.98	-0.0261	-1.39	0.096	0.0246			4.34	0.233	5.23	1	1.37	0.404	-3.28	2.12			4.73	-1.5	3.61	3.9	1.55	4.36	0.623	2.55
-2.57	0.665	0.0906	2.44	-0.187	-1.26	-2.5	-1.33			4.7	0.391	3.79	1.05	0.732	0.0439	-1.49	0.733			5.57	0.601	4.02	3.82	0.831	4.59	1.11	2.12
-2.34	-0.0814	0.528	2.43	1.06	-0.34	-0.868	0.936			4.57	-0.439	2.88	0.288	0.597	1.1	-2.93	0.556			5.56	-0.538	4.51	3.63	0.54	2.46	3.12	3.68
-2.05	0.281	0.31	2.64	2.96	-0.86	-0.398	-1.04			6.07	0.572	0.652	0.301	0.65	-0.484	-1.25	0.429			4.57	0.271	4.7	4.73	0.306	3.63	1.27	2.78
-0.533	-0.646	-1.21	2.29	3.73	-0.0467	-0.887	0.258			4.92	0.303	3.77	0.471	0.261	0.0499	-2.34	1.11			5.79	0.076	3.34	4.97	0.904	2.71	1.68	2.88
-3.4	-1.14	-1.41	3.12	1.45	-3.08	-1.03	0.324			5.3	0.764	2.92	0.262	0.127	-1.17	-3.11	1.97			7.16	-0.27	4.35	4.77	0.845	3.52	2.81	3.08
-3.43	-0.511	-0.71	2.98	2.79	-0.841	0.809	0.625			5.21	-0.452	3.45	0.12	0.0296	-0.102	-4.36	1.03			5.29	-0.218	4.49	4.12	-0.341	3.58	1.77	2.38
-2.15	0.175	-2.52	1.36	2.49	-1.67	1.66	0.356			4.25	0.362	2.36	0.489	-0.204	-1.14	-2.89	-0.874			5.13	0.67	3.48	4.35	0.212	3.65	2.55	2.19
-3.25	-0.373	-0.823	1.32	2.4	-1.69	-1.71	-0.0385			5.37	1.01	1.96	0.768	0.123	0.202	-2.67	0.879			5.73	0.0797	3.11	4.44	0.177	3.26	2.92	2.68
-2.52	-0.602	-1.05	1.14	2.91	-2.92	-1.47	0.42			4.86	0.888	2.46	0.0202	-0.206	0.909	-2.14	-0.744			7.63	-0.673	3.53	5.33	-0.121	2.49	2.32	2.5
-2.85	-0.117	-0.995	1.39	3.1	-1.23	-0.986	1.16			5.19	0.353	1.86	-0.237	-0.43	-0.391	-1.49	0.886			4.75	-0.933	2.58	4.95	0.122	3.44	1.57	3.07
-2.26	0.135	-0.482	0.801	3.55	-3.4	-0.381	0.798			5.05	0.664	3.53	-0.155	-0.327	0.106	-3.22	0.653			4.83	0.0739	3.85	4.58	0.496	2.13	1.75	2.98
-1.63	-0.904	-1.28	0.858	2.03	-2.13	0.752	0.42			5.39	0.525	0.677	-0.214	0.423	-1.05	-4.6	1.15			4.98	1.12	4.03	4.95	0.125	1.8	0.955	2.64
-0.433	0.409	-0.699	0.475	1.99	-4.06	0.638	1.06			4.45	-1.3	2.83	0.83	0.106	-1.11	-3.35	0.631			6.24	1.23	1.95	5.09	1.8	1.12	1.42	2.54
-1.16	0.474	-0.0849	1.54	0.881	-1.84	1.2	1.08			4.67	-0.09	2.48	1.09	0.373	-0.355	-2.7	0.00615			5.17	-0.588	4.82	5.07	2.06	3.71	1.64	2.52
-1.38	-0.759	-0.0743	1.58	0.708	-0.406	1.56	0.367			4.49	0.516	2.82	1.06	0.954	-0.747	-4.19	0.864			6.8	1.33	4.51	5.1	2.93	1.93	1.55	2.97
-2.6	0.783	-1.64	1.34	0.34	-0.568	-0.204	-1.37			3.48	-0.998	1.22	1.04	0.681	-2.81	-4.02	-0.26			7.43	0.4	4.46	4.59	3.44	3.31	0.517	2.88
-2.82	0.168	0.809	0.657	-0.154	1.47	-1.75	0.654			5.12	-0.253	2.61	1.06	0.544	-1.38	-2.71	-0.932			6.2	0.795	4.86	5.42	2.37	4.2	0.297	1.91
-1.08	-0.494	-0.204	-0.159	0.0473	2.04	-0.567	0.0977			4.99	-0.281	3.12	1.23	0.207	-1.41	-1.77	-0.638			6.29	0.615	4.27	4.48	2.65	3.23	1.31	2.79
-1.08	-0.72	0.44	-0.281	-0.675	-0.258	0.098	2.09			4.16	-0.59	1.55	0.98	1.06	-0.549	-3.38	0.686			6.47	-1.37	4.14	3.2	2.24	4.95	3.08	3.33
-1.08	0.783	-0.302	1.24	0.495	-0.0879	-0.188	0.816			4.39	1.23	4.67	0.853	0.916	-1.06	-4.17	0.122			6.67	-0.34	4.6	2.63	1.78	4.73	3.29	3.04
-2.2	0.602	-2.29	1.69	-0.0436	0.464	0.154	1.68			4.39	0.0691	3.05	0.4	1.03	-1.32	-2.83	0.334			7.28	-0.463	3.63	3.93	1.51	2.49	0.496	3.29
-4.38	0.246	-2.89	0.84	0.765	0.553	0.422	1.89			4.2	0.683	2.7	-0.217	0.87	-1.04	-3.66	0.45			6.49	-1.79	5.83	3.84	1.14	2.92	1.01	3.29
-1.36	0.545	-2.73	1.24	0.699	-2.83	-0.625	1.48			3.41	2	4.52	-0.499	1.53	-0.655	-3.06	-1.04			6.79	-0.847	3.99	4	0.854	3.3	3.13	2.55
-2.88	0.932	-0.555	0.000362	-0.108	-2.42	1.54	0.666			3.72	0.968	3.16	-0.588	0.875	-2	-4.27	-1.02			5.08	-1.17	2.12	2.75	0.258	2.22	2.79	2.13
-1.7	-1.1	-0.535	0.496	-0.856	-1.86	0.113	2.39			3.45	1.88	1.86	-1.54	0.234	-2.32	-3.28	-0.0755			5.54	-0.27	4.04	4.06	-0.0371	4.91	2	2.23
-1.38	-0.428	-1.2	0.213	-0.421	-1.65	-1.7	1.36			3.25	2.39	2.73	-0.238	0.273	0.277	-3.43	-1.01			5.74	0.272	4.07	2.87	1.61	3.44	1.05	1.24
-3.09	-0.157	-1.85	0.788	0.483	-1.46	0.0784	0.273			3.22	2.41	0.726	-0.47	0.269	0.205	-4.11	-0.107			5.56	0.659	5.17	2.05	1.57	2.94	0.697	1.49
-1.9	-0.478	-1.14	0.835	0.197	-3.65	-0.713	0.889			3.48	1.63	2.6	0.0533	0.364	-0.635	-3.08	0.522			5.68	0.579	4.67	3.19	2.3	3.13	2.89	1.09
0.346	-0.572	-1.78	-0.24	-0.391	-0.264	0.0578	0.45			3.42	1.04	1.39	0.966	0.7	0.117	-2.77	0.713			5.52	0.137	5.39	3.9	0.0865	2.57	2.53	0.652
-3.75	-1.35	-0.303	-0.497	-0.215	-2.04	1.4	-1.26			3.88	0.763	0.964	0.753	0.359	0.381	-2.47	0.0354			6.26	0.0928	5.09	3.63	0.254	1.82	2.39	0.594
-4.53	-0.425	0.328	-0.405	0.313	-3.79	-0.246	-1.62			3.57	0.634	3.47	1.41	-1.17	-0.421	-4.22	-1.12			7.43	-1.31	4.6	3.16	0.599	1.67	1.33	0.161
-3.98	-1.09	-1.56	-0.942	-0.183	-2.99	-1.77	-0.869			3.66	1.85	1.2	0.275	-0.268	0.288	-3.12	-0.74			6.08	-0.112	5.42	2.14	1.52	3.54	1.79	0.992
-2.3	0.661	-1.58	-0.249	0.123	-2.33	0.0585	-0.000612			3.9	0.692	1.94	0.962	0.515	0.122	-3.05	-1.27			5.18	1.41	3.46	1.74	2.05	4.95	1.69	1.56
-1.44	0.199	-3.07	-0.345	-0.289	-2.77	-1.48	-0.613			3.59	1.03	3.77	0.827	-0.0899	-0.339	-3.52	1.17			6.32	0.776	4.25	1.99	1.31	4.65	2.84	2.49
-1.52	1.41	-0.184	-1.11	1.08	-2.11	-1.02	0.113			3.76	2	2.22	1.53	-0.352	0.403	-5.16	0.521			6.48	0.694	3.54	1.92	2.46	3.6	3.55	1.68
-3.05	0.0708	-0.0224	-0.327	-0.872	-2.38	1.98	-2.18			3.65	2.1	2.07	1.12	-0.0169	0.107	-2.87	-0.356			5.12	-0.364	3.89	1.91	2.35	5.48	1.42	2.01
-2.39	-0.601	-1.74	0.762	-0.911	-3.71	1.44	-1.44			3.68	0.125	2.95	1.37	-0.162	1.57	-3.75	-1.41			6.31	-0.0686	5.5	3.5	1.05	5.36	2.22	2.01
-1.77	-0.906	-1.03	1.01	-0.504	-3.38	0.281	-1.44			3.59	0.566	2.11	1.79	0.493	0.172	-5.04	-0.0141			6.68	-0.477	5.38	3.78	1.12	2.63	0.638	2.05
-1.35	-0.0947	-0.851	0.189	0.258	-2.54	-0.0161	-0.781			3.63	-0.658	3.27	0.401	0.0609	-0.0738	-4.06	-1.21			5.53	-0.878	5.1	3.52	-0.56	3.97	0.657	1.82
-1.96	-0.4	0.567	-0.546	2.23	-3.05	0.302	-0.416			4.06	-0.122	1.96	0.762	0.199	-0.0412	-2.8	-0.971			7.17	0.181	5.05	3.5	1.49	4.41	0.808	2.27
-2.2	-1.14	0.31	0.00551	2.22	-3.04	-0.936	-0.124			4.69	0.578	3.99	1.6	0.28	0.767	-4.32	-1.65			6.2	-0.457	5	3.3	1.29	2.47	3.18	1.81
-1.97	-1.08	-1.28	0.195	1.52	-2.44	-1.48	-0.242			4.14	0.316	2.15	1.88	0.0591	-0.449	-4.7	-0.743			5.53	0.886	5.68	3.2	1.81	2.61	1.73	1.79
-1.08	-0.319	-0.747	0.739	1.25	-2.58	1.28	0.769			3.18	0.122	2.17	1.92	-0.261	0.468	-4.15	1.04			5.65	2.01	5.22	3.5	2.4	3.47	0.387	1.95
-3.23	-0.786	-1.25	0.48	0.564	-3.79	0.496	0.531			4.37	0.56	1.81	0.661	-0.115	0.33	-4.26	1.24			7.66	1.55	4.04	2.19	1.52	1.66	1.74	1.77
-1.49	0.284	-0.546	-0.0188	1.35	-3.27	0.959	0.171			4.04	0.956	0.475	-0.000561	0.353	-0.237	-2.98	-1.61			5.92	4.44	3.84	2.75	1.51	3.06	0.344	0.949
-2.46	0.779	0.594	-0.0944	2.88	-1.98	1.04	-0.571			3.38	0.724	2.27	-0.797	0.259	1.16	-3.68	-2.01			5.47	2.34	4.27	2.61	1.81	1.78	1.29	1.53
-3.47	-0.0743	0.184	0.383	3.52	-2.06	-0.254	-1.5			3.69	-0.884	2.17	0.252	-0.163	1.17	-1.64	-0.51			7.2	2.23	2.92	1.9	1.02	0.74	2.73	1.37
-3.91	0.254	0.291	-0.769	2.6	-3.86	-1.02	-1.75			3.87	1.51	1.73	-1.04	0.28	0.421	-3.98	-0.0495			8.17	1.84	3.5	0.681	0.813	0.903	1.96	1.21
-1.74	0.22	-0.945	-0.921	1.93	-4.29	-0.116	0.387			3.46	-0.292	3.1	-0.684	0.363	-0.855	-4.15	-0.818			5.55	2.38	3.98	1.98	-0.491	3.43	1.7	1.24
-4.18	0.372	-2.06	-0.432	2.1	-3.75	-1.37	-0.0597			3.42	-0.125	1.48	-0.676	-0.73	0.8	-3.79	-0.993			8.39	1.83	4.6	0.888	1.24	3.56	1.11	1.12
-3.33	-0.67	-1.88	-1.35	2.27	-2.55	-0.689	0.37			2.44	-0.186	2.3	-2.45	-1.58	-0.117	-3.01	0.235			7.52	1.68	4.62	-1.04	0.737	2.14	2.81	1.54
-3.55	-0.669	0.474	-0.429	1.86	-4	-0.302	-0.245			3.1	-1.19	2.34	-1.84	-1.42	0.85	-3.87	0.075			6.27	0.891	3.54	-0.512	-0.0484	2.88	1.68	1.08
-4.59	0.232	0.367	-0.683	1.68	-2.53	0.556	-0.553			2.22	0.26	2.7	-3.09	-1.08	0.702	-3.88	-0.0277			6.91	0.821	5.76	1.19	0.158	1.57	1.75	0.805
-3.84	0.485	-1.53	-0.463	2.44	-2.91	-1.09	-0.475			2.85	-0.627	2.67	-0.203	-1.44	-0.0806	-3.79	-0.554			6.47	-0.483	3.81	1.36	-1.94	0.189	1.48	1.53
-2.99	0.507	-0.838	-0.807	1.98	-2.07	0.497	-1.17			3.46	0.472	1.49	-0.424	-0.779	0.617	-1.99	0.313			5.89	0.327	4.67	1.38	0.197	0.2	1.13	1.18
-2.92	-0.137	-2.15	-0.68	2.14	-2.07	-2.07	-0.211			4.61	-0.549	0.171	0.799	0.159	2.74	-3.34	-0.557			7.13	-1.56	3.46	1.94	0.985	-0.0519	1.77	1.08
-2.89	0.0264	-0.612	-0.462	1.07	-2.76	-0.221	-0.387			5.03	1.42	1.61	0.439	0.118	1	-3.54	0.868			7.72	-0.327	5.18	2.58	1.1	0.669	0.245	0.854
-3.29	1.01	-0.268	-0.17	0.8	-2.73	-0.869	-1.28			4.67	1.66	-0.0738	1.73	0.29	0.96	-3.43	0.431			7.84	-0.115	4.86	0.678	1	1.79	0.728	0.652
-2.94	0.496	-1.81	-0.198	1.95	0.165	-0.123	-2.02			3.56	-1.02	0.685	1.51	0.343	1.52	-3.77	1.28			7.35	0.63	5.61	0.184	0.617	1.76	0.333	0.796
-3.49	1.1	-1.09	0.207	2.6	0.0376	-0.65	-0.381			3.82	1.37	2.23	0.802	0.32	1.34	-3.61	0.611			8.49	0.202	5.34	0.734	0.254	4.93	1.1	2.01
-2.68	0.279	-2.23	0.86	3.44	0.682	-0.971	0.0365			3	-0.739	3.87	0.959	-0.969	0.0607	-4.58	-0.602			6.22	0.248	3.08	0.671	0.513	4.84	2.11	1.3
-3.33	-1.31	-0.931	0.382	0.466	1.41	-0.747	0.144			4.1	0.179	2.2	-0.369	-0.814	1.51	-2.77	-0.879			6.77	0.569	5.42	-0.562	-0.314	2	1.72	1.03
-2.48	-0.374	-0.568	0.498	-0.515	1.66	-1.07	-0.802			4.74	-0.523	1.48	0.809	-1.36	0.764	-3.14	-0.861			5.91	1.19	5.24	-0.672	0.0704	3.66	2.41	1.57
-1.05	0.0555	-1.8	0.487	-0.0299	1.26	0.36	-1.15			4	1.01	1.68	0.671	-0.259	2.2	-3.45	-0.452			6.41	2.48	4.08	-0.769	0.407	4.15	1.86	1.16
-2.69	-1.66	-1.16	0.314	0.0646	-0.72	-1.7	-1.44			3.65	-1.92	4.44	0.463	0.61	1.53	-2.81	0.847			6.11	1.41	4.92	-1.88	1.3	2.68	2.25	1.48
-1.74	-2.75	-1.2	-0.186	-0.752	0.421	-0.934	-1.57			3.67	0.696	3.29	1.78	-0.123	2.46	-2.97	-0.13			6.05	0.903	3.3	-1.15	0.859	2.33	2.13	1.35
-2.69	-1.58	-1.06	-0.213	-1.06	-1.05	-0.0549	-0.0718			3.53	-3.18	5.08	1.25	-1.38	-0.802	-1.21	-0.0666			8.61	1.13	3.94	-1.42	1.01	4.11	2.51	1.07
-4.09	-1.19	-1.79	-0.0735	-0.615	-0.448	0.19	-1.33			3.63	-1.71	5.11	1.11	-1.4	1.97	-0.164	0.296			6.99	-0.108	4.97	0.68	-0.107	2.57	2.7	1.62
-3.39	-1.41	0.778	-0.323	0.388	0.0673	0.129	-0.966			3.94	-1.86	1.98	1.18	-1.18	-1.19	-0.52	0.155			6.46	-0.458	1.73	1.05	0.292	3.47	3.16	0.86
-2.72	-1.14	-2.32	-0.497	0.652	0.142	-1.67	-1.34			2.49	-1.46	5.2	0.952	0.0732	0.405	-0.585	0.341			6.48	1.48	3.32	-0.0672	1.25	2.11	1.85	1.53
-3.24	-2.97	-2.99	-0.597	0.59	0.247	-0.299	-0.959			2.63	-1.94	2.07	0.712	-0.532	-1.37	-2.7	-0.302			8.12	0.764	3.48	0.0572	0.341	1.89	2.23	1.94
-3.65	-0.772	-4.29	-0.29	1.08	-0.145	-2.48	-1.44			3.56	-0.911	1.56	1.38	-1	0.116	-2.89	0.53			7.27	-0.439	3.6	0.748	-0.884	2.67	1.01	2.32
-1.73	0.00992	2	-0.296	0.873	-0.503	-1.6	-2			2.49	-0.174	2.54	0.659	-1.35	1.63	-2.02	-0.596			7.64	0.748	3.9	0.476	0.12	3.32	0.646	2.86
-4.93	-0.644	0.134	-0.764	0.683	0.351	-1.35	-2.48			2.66	1.5	2.12	1.25	-0.951	0.299	-2.49	-0.418			7.31	0.117	2.91	0.346	1.43	2.92	2.03	1.77
-1.71	-0.554	-1.02	-1.03	1.09	-0.0769	-1.03	-2.33			3.91	0.33	3.69	0.996	-1.17	0.839	-3.23	-0.43			6.32	0.168	4.08	-0.389	1.68	4.32	1.46	1.65
-1.83	0.309	0.0962	-1.06	1.17	-1.73	1.05	-0.956			3.53	0.444	1.26	0.363	-1.2	2.08	-2.36	-0.846			6.58	0.908	3.19	-0.141	0.159	2.57	2.18	1.4
-2.45	0.113	-1.09	-1.4	1.06	-0.614	-0.16	-0.787			4.21	0.41	2.77	-0.313	-0.954	0.43	-2.73	-0.582			5.56	-1.95	4.53	0.175	-0.912	1.54	1.18	1.78
-0.883	-0.721	0.677	-0.891	1.2	-1.91	1.09	-1.76			4.23	0.957	2.29	-0.831	-1.36	0.0691	-3.12	0.723			6.55	-0.378	4.43	0.437	-2.69	2.47	1.37	2.02
-1.8	-1.9	-1.3	-0.695	1.42	-0.557	-1.04	-1.85			3.4	-1.04	2.54	-1.47	-1.05	0.49	-2.31	0.269			7.35	-1.42	3.99	0.898	0.0251	3.81	1.6	2.06
-1.85	-1.58	-0.396	-0.731	1.23	-0.979	-2.14	-2.13			3.11	1.06	0.65	-0.48	-0.836	0.301	-4.08	0.568			7.21	-0.453	4.05	-0.44	-0.0336	3.92	1.34	2.58
-3.17	-2.94	-2.31	-0.782	0.0288	0.51	-0.519	-1.41			3.32	0.256	-0.796	-1.48	-1.27	-0.105	-3.2	-0.262			7.34	1.4	4.96	-0.229	-0.416	3.5	0.902	2.47
-2.81	-1.95	0.262	-0.693	0.333	-1.18	0.259	-0.655			3.81	0.0604	2.03	-2.1	-0.874	-0.546	-2.74	-0.144			6.48	1.7	4.52	0.291	0.468	2.52	1.23	1.85
-1.42	-2.48	-1.32	-1.17	0.189	-1.54	-2.25	-2.24			4.06	1.16	1.83	-0.75	-0.233	0.846	-3.68	-0.847			7.54	0.265	4.2	0.298	-0.348	3.09	2.59	2.74
-2.03	-1.12	-0.544	-1.94	-0.19	0.695	-0.357	-0.764			4.32	0.757	1.64	-0.139	-0.309	0.884	-3.17	0.707			6.8	-1.72	3.22	0.49	-0.687	2.41	1.59	1.46
-2.77	-1.53	-1.72	-1.17	0.286	1.8	-1.01	-1.57			2.72	-0.747	0.991	0.428	-0.633	0.0129	-3.94	0.393			6.88	-0.583	4.9	0.914	-1.3	4.89	-0.63	2.23
-1.49	-1.11	-0.185	-0.991	1.35	1.13	-2.25	-1.04			3.49	0.481	0.982	0.151	0.542	-0.719	-2.59	-0.541			8.4	-0.327	5.2	1.06	-0.882	5.58	-0.438	2.26
-0.987	-1.91	0.364	-0.985	0.0382	0.642	-1.82	-1.24			3.21	-0.825	1.45	0.954	-0.0289	-0.447	-1.35	0.501			8.31	0.779	3.35	0.975	-1.47	3.77	-0.556	1.97
-0.439	-1.02	-1.2	-0.664	-0.615	0.304	-2.75	-0.895			2.81	0.552	1.82	1.13	-0.57	0.444	-4.15	-0.32			5.11	1.57	3.08	0.399	-1.6	3.82	-0.265	1.87
-1.16	-1.06	-0.99	-0.844	-1.26	1.08	-1.51	-1.51			2.49	-1.87	0.99	1.6	-0.877	1.06	-3.92	-0.807			7.15	0.493	4.86	-0.155	-1.81	2.87	0.708	2.14
-0.322	-1.95	-0.948	-0.639	-0.847	0.849	-2.22	-1.58			1.94	0.362	4.6	1.31	-0.429	0.944	-3.2	-0.306			5.27	-0.134	4.71	-1.1	-1.41	2.52	1.69	1.69
-0.733	-2.4	-2.13	-0.491	-1.29	1.08	-1.9	-0.806			1.68	-0.741	2.49	0.819	0.241	-0.165	-2.28	0.122			5.27	-0.452	3.11	-1.34	-1.03	3.66	0.354	1.42
-0.464	-1.77	-1.31	-0.879	-1.01	-0.26	-3.47	0.486			1.51	0.658	3.89	0.795	0.438	0.442	-3.24	-0.096			6.84	-0.378	4.64	-1.34	0.442	3.39	-0.953	1.23
-0.0708	-2.01	-1.02	-0.577	-1.53	1.84	-0.413	-0.84			2.15	0.39	2.95	1.31	0.511	0.955	-2.99	1.17			6.66	-0.107	5.05	-2.63	-1.61	3.62	1.29	2.06
-0.585	-0.857	-1.44	-0.329	-1.54	-0.714	-1.42	0.545			2.41	1.38	2.14	0.901	1.2	0.706	-3.79	1.2			5.15	0.252	4.17	-2.83	-1.27	4.65	1.32	1.52
-0.173	-1.79	-1.68	-0.21	-2.13	2.23	-1.1	-0.321			2.01	0.882	2.76	0.548	-0.00747	0.753	-2.64	2.35			5.65	-0.32	4.31	-1.31	-0.382	3.37	0.141	0.742
-0.00215	-1.99	-2.52	-0.417	-2.6	-0.0122	-1.04	1.14			2.82	0.653	4.49	0.704	-1.37	0.292	-4.52	0.584			7.29	0.161	3.48	0.929	-1.36	2.25	0.459	2.47
-0.966	-0.486	-1.57	-1.09	-2.85	0.933	-3.54	-0.362			2.97	1.42	1.47	1.17	-0.219	0.653	-4.26	1.19			8.36	0.204	4.1	0.597	-1.18	1.97	0.151	2.43
-1.76	-0.987	-0.0951	-1.22	-2.31	0.807	-2.33	-0.0259			2.68	-0.0158	2.3	0.808	-0.804	1.03	-1.84	1.17			7.08	1.16	3.57	0.592	-0.645	2.99	0.00146	2.03
-2.15	0.244	0.12	-1.87	-2.22	-0.386	-1.4	0.694			2.19	0.752	3.72	0.42	-0.306	1.1	-2.58	1.69			7.2	0.149	4.91	-0.3	-0.481	2.8	0.88	2.25
-1.5	0.216	0.314	-3.17	-1.64	0.0377	-1.7	1.13			2.46	-0.0899	4.73	0.18	0.253	1.37	-2.68	2.03			7.64	0.761	5.33	0.41	-0.309	3.38	0.442	2.24
-3.11	0.171	0.124	-2.55	-2.05	-1.1	-0.699	0.965			2.7	-1.51	3.7	-0.175	0.428	1.73	-3.47	1.04			7.23	2.27	3.67	0.654	-2.66	3.3	0.498	2.46
-4.55	-0.713	-1.25	-2.16	-2.56	-0.671	0.194	1.06			3.26	1.08	2.55	-1.23	-0.251	-0.258	-3.87	1.63			6.18	1.53	3.66	0.506	-3.04	3.79	0.538	2.12
-1.93	-1.67	-1.11	-2.48	-1.96	-1.8	0.33	0.838			2.78	1.06	4.13	-0.756	0.446	-0.945	-2.91	1.27			6.01	0.821	4.12	0.636	1.02	2.81	-0.0277	2.26
-1.64	-0.918	-2.38	-2.41	-2.51	-1.75	-2.21	0.827			3.7	0.984	3.8	-0.446	0.154	-0.678	-2.63	0.534			6.4	0.7	4.86	-0.522	2.07	2.91	-0.457	1.5
-2.17	-0.999	-2.16	-2.66	-2.2	-1.85	-0.926	0.923			2.83	-0.264	2.79	-0.0375	0.219	0.0513	-3.38	1.28			6.91	0.855	3.4	-1.58	3.47	0.315	0.552	0.103
-2.49	-2.08	-2.56	-3.01	-2.05	-1.47	0.708	1.02			3.08	-1.12	3.3	-0.44	0.575	0.994	-4.21	0.718			5.69	-0.385	2.9	-0.407	2.34	2.93	1.3	0.0573
0.253	-1.18	-1.78	-2.81	-2.38	-2.89	-1.11	1.26			2.84	-1.52	2.94	-0.792	0.38	0.963	-4.81	1.03			6.24	0.0824	4.26	-0.842	0.116	3.14	1.24	-0.377
-1.13	-0.28	-0.837	-2.39	-1.76	-1.75	-1.6	1.74			1.91	-2.16	2.34	-0.369	1.12	-0.18	-4.12	0.675			6.85	0.1	4.15	-0.582	0.546	3.18	2.18	0.202
-1.68	-0.93	-1.82	-1.63	-1.25	-0.26	-2.34	-0.104			1.86	-1.52	2.89	0.0626	0.948	-0.292	-3.1	1.13			6.15	1.02	4.45	-1.04	0.541	1.79	1	0.927
-0.853	-0.41	-1.54	-1.7	-0.373	-0.948	-0.545	0.516			2.61	0.283	3.78	0.0374	1.47	0.621	-2.71	-0.599			4.31	1.29	3.28	-0.85	0.738	2.22	-0.638	0.388
0.503	-2.85	-2.13	-1.64	-0.336	-0.867	0.611	0.617			3.13	1.33	3.15	0.152	1.04	-0.0308	-2.6	0.66			6.65	0.83	5.36	-0.125	0.441	2.7	0.28	0.184
-1.32	-0.328	-2.48	-1.05	-0.437	-0.499	0.53	0.671			3.22	-0.0495	2.81	-0.483	0.213	-0.435	-2.65	0.815			5.05	0.657	2.86	0.191	-0.605	2.96	-0.133	0.0153
-3.65	-0.815	-0.754	-1.58	-1.16	0.0987	-1.24	0.606			3.35	1.02	2.71	-0.349	0.0894	-0.523	-1.41	0.742			6.47	1.94	3.66	-1.15	-0.44	1.79	0.552	-0.0227
-3.16	0.436	-0.957	-2.13	-1.62	3.31	-0.853	0.846			2.75	-0.0506	0.881	-0.443	0.552	-0.478	-1.82	0.358			6.57	1.9	4.49	-1.12	-1.42	1.99	0.347	-0.0155
-1.62	0.0682	-0.194	-1.12	-1.1	-0.0204	-0.976	0.563			2.98	-0.0808	2.2	-2.81	0.872	-1.42	-2.53	2.45			5.05	2.87	6.51	-0.596	-0.669	1.58	0.216	0.0437
-2.41	-0.183	0.947	-0.737	-1.34	-1.32	0.766	1.37			3.6	1.1	0.469	-1.49	0.506	0.145	-2.58	0.538			5.89	1.64	2.99	2.69	-0.354	1.45	-0.6	0.0232
-1.99	-0.181	-1.75	-0.783	-1.8	0.0711	0.913	1.35			4.42	0.0132	0.339	-0.391	0.357	0.0543	-2.09	0.353			5.08	1.54	2.9	2.45	0.383	1.09	0.257	0.0321
-2.17	-1.43	0.616	-0.985	-1.88	1.94	0.568	1			3.53	0.0223	0.313	-0.0839	0.791	0.0472	-3.48	0.636			8.76	-0.65	3.87	0.751	2.17	1.2	-0.256	-0.317
0.101	-0.297	-0.899	-0.672	-1.64	2.32	-0.094	1.33			3.82	-1.31	1.77	0.746	1.71	0.484	-4.04	2.31			6.46	0.63	3.76	-1.49	0.706	-0.0778	1.04	0.101
-2.38	-1.35	-1.55	-0.506	-1.6	2.21	-1.8	1.62			3.65	0.323	3.57	0.761	1	0.746	-2.98	1			6.14	-0.0199	3.83	-1.97	-0.439	0.37	1.27	-0.117
-3.52	-1.13	-0.736	-0.345	-1.47	1.98	0.289	0.888			3.48	0.664	1.42	1.21	0.015	0.0791	-2.98	0.515			6.9	0.484	4.4	-1.44	-1.24	0.281	2.18	0.062
-1.37	-2.77	1.12	-1.13	-1.63	1.29	-1.45	2.48			3.77	0.705	1.35	0.814	-0.115	-0.00265	-2.45	1.14			7.32	0.346	3.65	-0.758	-0.0356	0.646	1.52	0.945
-1.8	-1.37	-0.737	-0.0679	-0.914	0.592	0.0218	0.0733			2.25	0.0947	3.12	1.24	-0.136	-0.847	-2.87	-0.312			6.61	0.839	4.35	0.156	-0.639	1.67	0.834	0.393
-2.11	-1.83	-2.94	0.514	-0.33	0.395	-1.29	0.892			2.19	0.782	4.14	0.542	-0.798	0.349	-4.81	0.126			3.97	-0.204	4.72	0.325	-0.993	1.88	0.409	-0.811
-1.96	-1.63	-1.52	0.999	-0.795	1.9	-1.48	-1.04			4.37	1.37	3.24	0.743	-0.74	-1.65	-2.37	0.901			6.12	-1.17	4.06	-1.97	-1.51	2.66	1.58	-0.753
-0.717	-2.51	-1.81	0.751	-1.5	0.043	-1.37	0.258			4.1	1.3	3.35	-0.377	0.351	0.0657	-2.74	1.21			5.3	0.898	3.34	-2.76	-1.63	3.53	2.48	-1.33
-1.63	-2.05	-1.78	0.491	-2.12	1.8	-2.3	0.103			3.55	-0.848	3.52	-2.43	0.345	-0.789	-2.91	0.841			5.06	1.95	3.11	-3.85	-2.16	1.63	1.39	0.227
-1.52	-1.89	-1.88	-1.45	-1.91	1.18	-1.53	0.206			3.17	0.32	3.32	-2.07	0.0172	-0.539	-2.64	1.41			4.96	1.03	2.74	-3.21	-1.9	0.769	0.913	-0.517
-1.72	-1.63	-2.49	-1.11	-2.17	2.44	-0.033	1.39			2.65	0.001	4.11	-1.3	0.826	-0.745	-3.77	1.54			4.21	0.602	2.97	-1.44	-1.92	2.91	1.78	-0.361
0.193	-1.49	0.224	-0.78	-1.96	1.68	-2.75	1.18			2.9	0.893	3.24	-1.27	0.375	-1.31	-2.97	2.01			5.84	1.68	5.27	-1.83	-2.15	2.18	-0.363	-0.514
-1.44	-0.503	-0.543	1.49	-3.01	4.09	-2.11	1.83			2.77	0.849	3.67	-0.0851	0.677	-1.13	-2.54	1.08			6.81	0.0979	4.53	-0.325	-1.51	1.36	0.831	0.2
0.382	-1.19	-0.543	1.8	-2.29	2.15	-1.76	1.89			2.73	-0.669	2.18	-0.694	0.121	-1.26	-1.66	0.597			7.45	0.678	4.47	-0.488	-0.713	2.24	-0.0665	-0.0627
0.6	-0.8	-1.36	1.09	-3.52	2.42	-1.75	2.11			2.5	-0.693	4.43	-0.932	-0.639	-1.65	-4.14	0.872			6.18	0.351	3.41	-1.09	-1.64	1.35	1.95	-0.128
-1.33	-0.151	-1.21	-1.44	-2.96	1.03	-1.04	1.3			3.03	0.783	3.75	-0.733	-0.19	-1.56	-3.24	0.622			7.28	2.11	4.6	-2.24	-2.38	0.537	0.161	0.0348
-1.36	0.384	-1.89	-0.671	-2.12	0.279	-1.82	0.549			3.13	0.0597	3.93	-0.495	0.123	-0.917	-1.3	-0.157			6.14	2.39	4.17	-0.203	-1.71	0.203	1.26	0.253
-1.98	0.0715	-0.789	0.191	-3.31	1.4	-1.62	-0.0183			2.74	-0.866	2.98	-0.569	0.704	0.975	-3.18	1.27			6.72	2.64	3.97	1.1	1.91	0.52	0.0655	0.111
-3.92	0.57	-0.888	0.115	-2.43	2.29	0.889	0.0618			4.03	1.08	2.4	-1.83	-0.473	-0.374	-5.63	1.74			7.35	1.34	2.73	0.717	2.55	0.522	1.35	-0.168
-2.45	-0.123	-1.03	0.344	-1.16	1.65	1.67	0.34			4.84	0.717	2.15	0.348	-0.813	-0.39	-4.27	0.0983			6.52	2.59	2.78	0.13	5.07	0.376	1.99	-0.0994
-1.68	0.527	-1.83	-0.286	-0.557	1.54	-0.495	-0.512			4.26	1.69	3.15	0.472	-0.578	1.48	-2.45	0.298			6.28	1.74	3.35	-0.541	4.89	-0.12	2.05	-0.47
-2.68	0.378	0.0147	-0.0868	-0.958	1.45	-1.54	-0.209			3.68	2.52	3.67	-0.689	-0.209	1.99	-3.17	0.455			5.99	1.55	3.74	-0.973	3.6	0.116	1.42	-0.0369
-1.12	-0.24	1.27	-0.534	-1.83	0.573	0.283	-0.329			4.14	1.31	5.01	0.771	0.464	0.889	-3.06	-0.688			5.89	2.21	2.26	-0.198	4.48	-0.238	0.946	-0.235
-1.71	-1.53	-2.43	-1.49	-1.66	0.835	-1	-1.14			3.95	-0.168	3.97	0.559	-0.247	0.367	-4.98	1.91			5.58	2.12	1.39	-0.35	3.86	0.645	0.511	0.459
-1.89	0.0823	-0.356	-0.898	-0.816	0.348	-0.745	-1.66			4.05	-1.07	3.65	0.489	0.141	0.756	-4.59	1.22			6.44	2.87	3.23	-0.571	5.17	-0.75	0.636	0.931
-0.732	0.407	-0.0268	-0.192	-1.05	1.73	-0.172	-2.57			4.39	-0.746	3.32	-0.0909	-0.139	-0.848	-2.97	1.25			6.57	3.33	3.64	-0.503	3.84	-0.0264	-0.117	0.632
-3.21	1.37	-0.338	1.09	-0.97	0.788	-1.09	-0.16			4.04	-0.0513	1.6	-0.264	0.351	-0.735	-2.23	1.81			5.44	3.17	2.66	0.442	3.62	-0.0609	1.9	0.246
-3.35	0.837	-1.98	0.374	-0.65	1.93	-2.05	0.424			3.74	-2.95	1.46	-1.78	0.636	-0.318	-3.61	0.347			6.03	3.38	4.1	0.313	3.11	0.641	1.16	0.298
-1.21	0.875	-0.765	0.0935	-0.981	1.19	-1.57	0.842			3.47	-1.89	4.13	-0.625	0.838	0.794	-4.36	1.18			6.21	3.14	3.36	0.296	3.07	-0.468	-0.323	-0.029
-0.457	-1.25	-0.88	0.189	0.164	2.16	-2.37	0.871			3.19	-1.14	2.8	-1.85	0.361	0.372	-2.13	1.09			3.53	4.66	0.795	0.872	3.8	-0.509	0.0631	-0.067
-1.53	0.602	-1.15	-0.824	0.369	2.73	-3.43	-1.28			3.08	-1.1	2.41	0.263	0.948	0.846	-1.81	0.711			5.06	3.49	1.93	0.799	2.62	-1.41	1.45	0.123
-1.9	-0.371	-0.587	-0.478	0.683	2.11	-3.07	-1.11			3.49	-2.13	3.7	-0.83	0.408	1.4	-3.65	1.19			5.85	3	2.3	0.13	3.14	0.371	0.496	-0.141
-1.92	0.513	-0.166	-0.428	0.58	-0.285	-3.11	-0.144			2.33	-1.29	2.51	-0.633	0.0616	0.594	-2.93	1.11			5.19	4.74	3.41	-0.584	3.44	1.23	1.16	0.209
-3.44	-1.08	-0.937	0.445	0.0809	0.401	-1.18	1.01			3.65	-1.93	1	-0.721	0.725	1.28	-3.29	0.395			4.8	3.23	4.23	-0.825	3.27	2.06	1.26	0.0187
-1.81	-2.04	-0.999	1.42	-0.294	0.639	-0.63	0.636			3.97	-2.85	2.92	-0.505	0.385	0.465	-5.04	0.649			4.37	3.13	2.26	-0.804	2.83	1.84	2.27	0.791
-2.05	-1.92	-0.415	0.674	-0.412	0.648	-1.52	-0.427			4.38	-2.68	3.38	-0.613	0.715	0.378	-5.41	0.108			4.33	1.72	3.54	1.12	2.31	2.24	1.57	-0.346
-0.668	-1.64	-2.75	0.952	0.206	1.68	-0.733	-0.699			3.87	-0.256	3.96	0.0496	0.688	1.16	-4.01	0.443			5.76	2.58	2.15	1.29	3.28	0.231	-0.254	0.00888
-3.56	-1.46	-0.911	1.22	0.148	-0.53	-0.464	-1.96			4.14	-0.422	0.97	0.269	0.16	-0.585	-4.91	0.0694			4.99	2.66	3.49	0.49	2.7	1.62	0.887	0.09
-1.44	-1.49	-0.708	0.777	-0.133	1.51	0.347	-1.24			3.2	0.658	2.12	0.17	0.445	-0.0838	-4.09	-0.542			4.15	4.21	2.24	0.492	3.54	2.47	0.478	-0.17
-2.66	-1.52	-0.905	1.19	0.126	-0.426	-0.993	-2.44			3.21	-0.0125	1.46	-0.421	0.145	0.00368	-3.46	0.755			5.92	2.84	3.42	0.283	2.47	2.75	0.16	-0.337
-0.441	-1.38	-3.9	1.3	-0.16	0.375	-0.127	-1.9			2.92	-0.576	2.5	0.418	-0.598	0.281	-2.87	0.799			6.39	3.77	1.76	0.906	1.95	3.27	-1.12	-0.361
-0.771	-0.911	-0.718	1.89	-0.167	0.678	-0.093	-1.58			3.71	-1.28	0.331	0.167	0.754	0.911	-3.79	-0.327			6.21	3.81	2.42	0.963	1.4	2.46	-0.692	-0.708
-0.296	-0.329	-1.99	0.835	-0.839	-0.827	-1.21	-1.24			3.05	-1.58	3.82	-0.49	1.05	-0.625	-1.33	0.0187			4.8	4.08	2.96	2.1	1.84	3.03	0.625	-0.389
1.61	-0.489	-0.919	1.35	-0.205	0.788	-1.23	-1.07			2.68	-1.1	3.08	-0.311	0.313	0.265	-2.54	-1.21			4.34	1.79	2.23	3.29	1.53	2.69	-0.886	-0.309
-2.09	0.369	-3.25	0.647	0.0134	0.466	-1.91	-1.61			2.71	-1.77	3	-1.93	0.347	0.278	-1.96	-0.0614			6.39	1.42	3.02	3.22	0.341	2.11	-0.835	-0.679
-2.95	-0.946	-0.893	0.352	-0.423	0.408	-1.09	-1.73			1.52	-1.33	4.24	-1.13	1.05	-0.905	-4.01	-0.209			6.09	2.13	5.31	2.73	0.753	2.06	-0.337	-0.575
-2.52	-0.54	-0.417	1.12	0.0154	-1.16	-1.02	-1.25			2.42	-0.244	4.05	-0.889	1.05	0.235	-2.23	-0.496			5.18	1.99	5.01	1.78	1.75	2.67	-0.734	-0.886
-1.13	-0.249	-0.932	0.961	-0.237	-0.145	-0.708	-1.76			2.67	-0.259	2.62	-1.55	1.67	1.1	-3.03	-0.151			5.51	0.957	3.14	0.775	2.01	2.51	-1.14	-1.13
-2.7	-1	-1.97	1.49	-0.252	-1.16	-1.74	-1.39			2.61	0.204	2.79	-1.56	2.96	-0.29	-3.24	-0.325			5.98	1.5	3.84	1.09	1.75	2.9	-0.613	0.353
-1.48	-1.17	0.293	2.02	-0.317	-0.058	-1.57	-0.522			2.36	-0.52	1.91	-2.01	2.76	0.567	-2.28	-0.221			4.95	1.89	2.81	1.81	-0.289	3.27	1.1	-0.599
-3.17	0.112	-1.83	1.29	0.0439	0.487	-2.88	-1.44			2.61	-0.219	2.14	-2.4	2.63	-0.0924	-2.47	-0.544			6.73	2.36	4.43	1.46	0.713	3.1	0.698	-0.174
-2.6	0.334	-0.0436	0.622	0.386	-0.316	-2.61	-1.68			3.4	-0.894	2.03	-1.84	3.19	-0.201	-3.33	0.0768			4.49	2.56	1.65	1.53	0.875	2.16	0.179	-0.708
-1.47	0.233	-3.06	1.43	0.702	0.241	-1.7	-1.52			2.82	0.847	1.21	-2.37	2.3	0.323	-2.85	0.82			4.38	1.99	2.35	0.872	-0.612	1.28	0.934	-1.43
-2.77	-0.179	-0.244	1.83	-0.176	0.224	-1.14	-1.7			2.89	-1.29	2.27	-1.21	2.44	2.06	-2.92	1.43			5.47	0.293	1.62	0.716	1.12	2.83	-0.108	-1.26
-2.04	-1.07	1.09	2	-0.645	1.25	-2.43	-1.61			2.26	-1.47	3.67	-1.18	2.51	-1.05	-3.03	0.857			5.3	0.417	3.03	0.908	0.439	4.03	-0.736	-0.658
-2.98	-0.576	-0.136	2.36	-0.347	1.24	-1.68	-1.92			2.28	-3.57	2.16	-1.57	1.97	0.0276	-3.95	1.11			5.87	1.31	2.91	1.42	0.864	4.27	-0.688	-0.78
-3.22	-0.673	-0.756	1.95	-0.073	1.42	-1.44	-0.657			3.04	-0.665	3.68	-0.934	1.38	0.0712	-3.46	1.78			6.93	1.86	4.32	2.53	1.33	2.16	0.108	-0.777
-2.03	-1.9	-2.45	2.74	-0.577	0.93	-0.815	-1.08			2.88	-2.57	2.01	-1.75	-0.525	-1.48	-4.44	1.7			4.85	2.04	4.96	2.58	0.294	1.64	0.142	-1.18
-3.27	-1.55	-0.462	1.91	-0.586	1.95	-1.12	-0.206			3.93	-0.785	3.18	-1.17	0.848	0.2	-2.33	1.08			5.6	1.2	3.25	2.61	1.2	1.58	0.103	-1.52
-2.37	-2.02	-0.638	1.03	-0.0872	1.57	-1.44	-2.42			2.51	-1.8	1.22	-1.17	0.82	-0.344	-2.88	-0.0994			7.01	2.04	1.31	1.07	0.982	0.815	-0.0395	-2.04
-3.17	-1.95	-2.14	1.98	0.522	2.45	-1.19	-1.82			2.77	0.521	-0.243	0.216	1.28	-0.769	-4.48	0.773			4.46	1.67	1.97	1.05	0.282	2.18	0.305	-1.39
-3.31	-1.11	-1.57	2.89	-0.156	2.61	-2.23	-1.56			3.5	-0.765	-0.492	0.155	1.31	-0.834	-2.2	0.889			6.04	1.78	2.49	1.04	0.221	1.56	1.32	-1.59
-2.56	-0.918	-1.47	3.72	-0.532	2.83	0.468	-1.13			3.62	-0.378	1.38	-0.199	1.11	0.162	-4.58	-0.212			6.21	1.38	1.07	0.833	0.137	1.75	-0.06	-2.4
-2.79	-1.43	-1.54	3.09	-0.687	1.3	-0.691	-1.93			3.95	-0.78	2.78	-2	1.02	-0.692	-2.67	1.02			5.95	1.75	2.4	0.953	1.14	0.799	0.239	-1.59
-3.01	-0.0185	-1.68	2.75	-0.197	1.82	0.933	-1.81			3.69	-0.747	0.118	-2.33	0.799	-1.06	-3.35	-0.233			4.46	1.7	1.21	2.07	0.615	2.04	0.786	-1.91
-2.6	0.702	-0.855	2.48	-0.0656	2.47	-1.41	-1.76			2.86	-1.5	3.31	-0.846	0.158	0.454	-4.47	-0.974			5.46	1.61	1.76	2.66	-0.0122	3.28	-0.291	-1.97
-1.62	-0.406	-1.3	2.84	-0.229	2.4	0.273	-2.51			3.91	-1.02	2.39	-1.66	-0.335	-0.482	-3.81	-0.711			4	0.237	0.662	1.89	-0.598	3.97	0.206	-2.89
-1.66	-1.05	-0.0396	3.16	-0.958	1.3	0.365	-1.24			2.67	-0.804	1.95	-1.38	0.103	-0.978	-2.94	0.28			3.99	-1.13	1.59	2.04	-2.12	3.61	-0.206	-1.67
-1.12	-0.954	-1.89	3.49	-0.177	2.13	-0.29	-1.82			3.71	-0.333	2.79	-1.76	-0.339	-2.46	-2.87	0.201			4.29	0.354	1.3	2.3	-2.62	4.17	0.869	-2.06
-1.79	-0.484	-0.0996	3.73	-0.446	3.84	-0.056	-1.03			2.19	-1.28	1.62	-0.995	0.0504	-0.153	-2.78	0.13			5.61	0.737	2.86	2.06	-2.2	4.88	-0.23	-1.99
-0.84	-1.12	-1.46	3.8	-1.39	2.27	-1.39	-1.94			1.85	-1.22	3.83	-1.42	-0.647	-1.33	-4.51	0.838			4.46	0.218	1.43	1.78	-2.37	3.77	1.36	-1.44
-0.691	-0.559	-0.219	4.08	-0.904	1.06	-1.9	-0.703			3.25	-0.863	3.66	-1.02	0.215	-1.91	-3.15	-0.624			5.35	1.73	0.926	1.22	-3.45	4.88	-0.596	-1.94
-1.39	0.571	-2.26	3.97	-0.672	1.54	-0.811	-1.89			3.79	-1.1	2.36	-1.29	0.809	-2.35	-2.92	-0.598			7.38	1.13	1.97	0.889	-3.81	3.7	-0.49	-1.04
-1.41	-0.99	-0.0361	3.62	-1.14	2.69	0.167	-1.45			3.38	-0.563	1.05	-1.6	1.13	-0.933	-2.82	-0.068			6.06	1.71	1.95	0.774	-2.75	4.7	-0.92	-1.88
-4.03	-1.07	-1.39	3.83	-2.26	1.49	-1.21	-1.31			3.21	-0.104	2.16	-0.876	0.375	-0.281	-1.63	-0.805			5.03	0.43	0.752	0.826	-3.39	3.54	-0.896	-1.93
-1.09	-1.31	0.977	3.12	-2.3	2.18	-0.242	-1.38			2.94	-0.234	1.88	-1.09	0.528	1.14	-1.82	-0.0331			3.93	-1.75	1.51	0.25	-1.93	3.07	0.0433	-1.97
-1.62	-1.32	0.261	3.57	-1.91	2.36	0.808	-2.01			3.39	0.967	2.65	-0.434	1.23	1.89	-3.37	-0.685			5.29	-1.11	1.55	0.892	-1.76	3.34	-1.11	-1.81
-0.625	-0.451	-0.278	3.18	-1.65	3.36	-1.09	-1			3.16	-0.636	1.08	-0.323	-0.247	-0.454	-2.46	-0.973			6.05	0.161	2.71	0.238	-0.845	2.93	-0.107	-1.9
-2.39	0.212	-1.79	2.83	-2.14	2.74	-1.33	-1.08			3.54	-2.38	1.82	0.545	-0.869	-0.977	-2.89	-1.53			4.34	1.95	1.63	0.663	-1.54	1.75	0.561	-1.64
-3.97	-0.738	0.276	2.85	-1.65	2.66	0.285	-1.97			3.01	-1.08	2.69	0.533	0.313	-1.54	-1.55	-0.761			4.41	0.451	2.18	0.421	-0.963	1.94	0.664	-2.09
-3.4	-1.16	-2.04	2.5	-1.64	1.78	-0.327	-0.65			3.35	0.812	1.14	0.0647	0.412	-0.131	-2.82	-0.255			4.8	0.662	1.65	1.09	-0.525	2.61	0.542	-1.59
-3.11	-0.609	-2.43	1.85	-1.49	1.63	-1.98	-0.794			3.57	-0.738	2.2	-0.26	-0.257	-0.486	-3.47	-1.2			5.94	-0.0294	2.28	0.354	-0.823	3.31	-0.976	-0.782
-3.6	-2.67	-2.25	2.61	-0.917	1.3	-1.84	-1.84			3.27	-0.487	2.82	0.535	0.484	-1.12	-4.38	-0.495			5.12	-0.751	0.887	0.869	-0.98	1.56	-0.652	-1.52
-3.07	-1.06	-1.59	2.86	-1.45	2.42	-0.972	-2			3.17	-0.713	3.63	-1.52	0.451	-0.793	-4.94	1.27			6.29	-0.0707	3.18	1.08	-1.18	3.89	-1.71	-1.28
-3.31	-0.0132	-0.724	2.49	-1.39	2.32	0.107	-2.54			3.29	-0.488	3.32	-0.338	1.03	-0.192	-3.6	0.182			6.29	-0.0687	4.04	0.804	0.0532	3.97	0.257	-0.827
-3.94	-0.268	-2.02	2.19	-1.98	1.87	-0.793	-2.19			4.02	-1.24	2.99	-0.0822	1.44	-0.992	-3.98	0.913			5.48	1.36	1.29	2.32	-1.53	5.21	0.756	-0.811
-1.98	-0.0212	-3.99	1.78	-1.62	1.26	-0.85	-1.31			3.85	0.451	0.98	0.298	1.07	0.153	-4.14	-0.869			5.1	1.1	0.97	1.93	-1.68	4.89	-0.496	-1.19
-2.39	-0.0732	-4.29	1.57	-1.49	1.27	-1.23	-0.554			4.03	1.11	2.29	-1.7	1.41	0.641	-3.38	-0.958			6.74	0.452	2.88	0.218	-2.65	4.46	0.517	-1.51
-4.06	-1.17	-1.24	1.26	-1.79	2.26	-0.549	-0.745			3.35	1.16	2.1	-2.6	1.13	-0.12	-6.12	0.572			5.42	1.21	2.24	0.376	-0.998	2.42	1.29	-1.72
-5.45	-1.38	-3.13	1.34	-0.863	1.37	-0.339	-0.539			3.21	1.87	3.43	-2.52	0.973	-0.458	-3.84	0.277			4.94	0.523	1.74	-0.549	-0.309	3.21	1.78	-1.78
-5.86	-0.587	-1.83	1.52	-1.85	0.597	-0.135	-0.885			3.69	0.0341	1.01	-2.24	0.592	-0.279	-2.41	0.0667			5.13	0.437	0.675	-0.134	-2.04	3.35	-0.0108	-1.7
-4.31	-2.39	-0.151	1.51	-2.14	-0.349	-0.733	-0.119			3.78	0.338	1.87	-2.34	0.877	-1.33	-3.15	0.718			3.54	1.7	3.24	-0.382	-0.914	2.86	1.11	-0.845
-4.3	0.119	0.46	1.6	-2.07	0.385	-0.57	-0.953			2.89	0.39	3.91	-0.341	1.25	-1.68	-2.67	-0.5			4.45	1.03	3.66	0.179	-1.5	2.84	-0.702	-1.2
-4.01	-1.56	-1.37	2	-2.65	-1.78	-1.59	-1.01			2.5	-0.607	1.63	0.411	1.16	-0.549	-4.21	-1.75			4.11	-0.974	3.4	-1.64	-0.546	2.79	0.132	-0.81
-4.94	-1.14	-2.27	1.94	-3.29	0.848	-3.48	-0.771			3.14	-0.746	2.94	0.405	0.957	-0.386	-5.04	-0.849			3.18	-0.478	2.92	-1.2	0.239	2.17	-1.21	-0.602
-4.87	-0.928	-0.0786	2.31	-2.85	0.374	-0.997	0.127			4.05	0.103	2.54	1.05	0.761	-0.795	-5.3	-1.21			5.68	1.88	2.54	-1.53	-2.01	2.46	-1.12	-1.15
-6.03	-2.85	-0.0411	1.43	-2.44	-0.483	-1.9	-0.85			3.47	-0.409	1.53	1.35	1.23	1.08	-3.06	-1.24			3.62	0.288	2.17	-1.41	-1.39	2.63	0.182	-1.13
-4.46	-0.746	-1.96	1.1	-2.66	-0.185	-2.93	-1.14			3.63	0.952	1.06	0.737	0.95	0.621	-4.34	-0.231			4.81	-0.339	1.45	-0.313	-1.4	1.86	0.00814	-1.72
-2.89	-1.61	-0.27	1.47	-2.73	0.884	-2.12	-1.69			3.62	-0.706	2.81	0.338	-0.189	2.48	-3.41	0.187			3.75	0.0761	1.92	1.04	-1.97	3.38	0.214	-1.44
-3.65	-1.28	-0.306	0.626	-1.68	0.84	-1.2	-1.21			3.32	1.41	0.462	-0.22	-0.308	0.551	-2.63	-2.5			2.46	0.705	3.05	0.866	-2.48	3.48	0.522	-1.35
-3.09	-0.638	-0.894	0.0486	-1.99	1.1	-1.32	-2.39			2.11	3.04	1.62	-0.963	0.312	-0.127	-4.13	-0.287			4.07	1.23	1.93	0.824	-1.68	2.84	0.9	-1.39
-5.65	0.0632	0.0359	0.723	-2.89	3.97	-1.66	-1.06			2.54	3.15	2.32	-1.41	0.79	0.567	-3.77	-0.186			3.69	1.66	-0.207	0.828	-1.27	3.72	0.135	-0.508
-3.43	0.0745	-0.11	1.03	-1.41	2.27	0.408	0.286			3.05	2.99	1.29	-0.703	0.817	0.147	-3.22	1.2			3.26	-0.847	0.878	-0.504	-1.37	3.4	1.18	-1.35
-2.64	-0.685	-2.15	0.412	-0.633	0.244	-1.86	-0.296			2.61	2.51	0.659	-0.319	1.21	-0.638	-3.11	0.272			3.37	-0.263	0.336	-0.685	-1.78	4.64	0.311	-1.31
-3.28	-1.08	-1.67	0.787	-0.0501	-0.677	-2.74	-1.64			2.46	1.71	3.15	-0.774	0.491	0.126	-2.85	1.06			3.8	0.787	0.708	0.364	-1.72	4.09	1.18	-1.33
-4.59	0.375	-1.7	1.29	-0.965	-1.33	-0.747	-2.08			3.06	1.13	2.78	-1.31	0.832	-0.0405	-3.53	0.371			5.02	0.61	2.05	0.28	-0.0192	2.63	0.128	-0.241
-2.16	0.185	-1.89	1.95	-1.55	-2.16	-0.163	-1.58			3.99	2.34	2.67	-1.45	1.35	-0.819	-5.52	1.43			3.57	-0.987	1.9	1.58	-0.519	3.51	1.78	-0.661
-4.06	0.711	-1.6	2.44	-0.868	-0.423	-3.22	-0.233			3.24	2.59	3.63	-2.43	1.88	0.14	-3.87	0.361			2.21	-0.12	2.43	2.22	0.233	5.77	-0.4	0.416
-3.14	-0.00968	-0.951	2.58	-2.02	-0.144	-2.39	-0.751			4.2	1.33	1.11	-1.05	1.32	-1.26	-5.71	0.899			3.25	-1.65	1.43	1.13	-0.0641	3.7	1.51	-0.46
-2.42	-1.51	-1.44	3.3	-1.81	1.93	0.0412	-1.68			2.72	0.163	1.08	-0.163	1.99	-0.438	-3.58	0.685			4.41	0.626	0.367	1.31	-0.463	2.5	-0.486	-1.02
-5.63	-0.999	-1.09	3.88	-3.75	0.672	-1.16	-2.46			3.83	1.97	0.603	0.281	1.61	0.844	-1.82	-0.244			4.66	0.204	1.99	0.651	0.187	4.59	-0.406	0.727
-3.92	-1.56	-2.91	3.83	-3.56	0.655	-1.07	-0.702			4.04	0.677	1.43	0.28	1.2	0.558	-4.77	0.201			4.98	0.102	0.801	1.54	-0.633	4.43	-0.0191	-0.59
-3.65	-0.737	-3.24	2.65	-2.76	2.01	-1.21	-0.905			2.35	1.06	0.986	0.471	1.38	-1.11	-3.37	-0.827			6.67	0.0486	1.81	1.84	0.783	3.87	-0.881	-0.406
-4.3	-0.118	-0.927	1.42	-2.08	1.49	-0.862	-0.767			3.04	1.02	1.68	0.484	1.2	-1.02	-4.62	-0.943			4.69	-1.1	1.41	1.57	-0.545	3.93	-1.14	-0.264
-5.15	0.242	-1.76	1.36	-1.82	1.04	-0.228	-1.09			2.77	-0.051	0.341	0.822	1.27	-1.52	-5.4	-0.364			5.09	0.782	2.24	-0.742	-0.469	4.34	1.04	-0.0551
-4.54	-1.08	-0.685	1.9	-2.23	1.67	-0.941	-2.22			2.32	0.43	2.22	0.892	2.12	0.711	-4.33	-0.351			4.99	-0.62	2.71	-1.96	0.102	5.22	-0.679	0.397
-5.07	-0.917	-0.775	2.04	-2.14	0.84	-1.64	-1.03			2.29	1.34	2.61	0.14	1.42	-1.11	-4.67	-0.141			4.17	-0.581	2.31	-2.13	0.0788	5.42	0.271	0.954
-1.95	0.383	-3.63	2.07	-2.4	0.467	-1.9	-2.12			2.27	3.49	0.966	0.452	1.38	-0.53	-2.57	0.284			4.71	-0.571	-0.134	-1.29	-0.266	4.14	1.07	0.717
-2.72	0.373	-1.69	1.57	-2.16	-1.5	-0.577	-1.58			2.41	2.86	0.562	-0.859	0.995	0.247	-4.76	-0.272			6	1.32	1.73	-1.04	-0.688	5.14	0.1	0.15
-4.22	-0.828	1.11	1.01	-3.02	0.0509	-0.107	-1.66			1.24	1.77	0.0296	0.457	0.83	1.4	-4.08	-0.346			4.59	0.476	2.07	0.00948	-0.274	1.72	-1.6	0.597
-5.15	-2.47	0.119	0.739	-2.69	1.52	-2.62	-1.14			2.25	1.37	1.67	-0.366	0.925	1.53	-3.49	-0.149			5.75	0.133	2.21	-0.0719	0.299	2.35	-0.0884	0.0263
-3.61	-2.24	0.118	1.19	-1.99	1.42	-0.0366	-1.14			1.88	2.6	0.408	-1.55	-0.228	0.746	-4.01	-0.171			3.7	1.54	-0.571	0.25	-0.901	2.11	0.606	-0.457
-2.54	-1.37	-0.727	1.98	-1.58	1.65	-1.04	-1.49			2.19	2.94	1.77	-1.76	-0.592	-1.68	-3.69	-1.42			2.58	0.962	-0.0302	-0.601	0.294	2.57	0.877	1.55
-1.99	-2.84	0.127	1.79	-1.96	1.21	-1.57	-0.657			0.972	1.82	1.14	-1.04	0.158	-0.0895	-5.42	-0.763			2.78	2.08	-0.239	-0.0567	0.931	2.92	-0.122	1.62
-5.17	-2.37	-0.643	1.12	-2.75	1.27	-1.73	-1.19			2.12	2.28	1.52	0.353	0.367	0.617	-4.36	-0.467			3.44	1.38	0.975	0.344	0.545	3.23	0.871	0.676
-4.65	-0.996	-1.08	0.867	-2.79	1.01	-0.638	-0.511			2.17	2.7	3.41	1.89	0.0891	1.61	-5.17	-1.64			4.66	2.19	-0.617	-0.0725	0.965	1.29	-1.29	1.55
-4.77	-1.66	-2.14	1.44	-2.56	0.715	-1.63	-0.889			2.08	1.26	0.563	-0.455	0.735	1.72	-4	-0.627			4.72	1.44	-0.344	-1.33	-0.168	2.24	-0.934	2.08
-4.02	-0.591	-1.24	1.33	-1.52	0.654	-2.47	-0.375			0.768	1.25	1.9	-0.434	0.456	0.251	-5.38	0.715			3.09	1.57	-0.838	-0.824	-0.579	2.63	-1.31	0.803
-4.88	-0.489	0.149	1.46	-0.354	1.87	-0.481	-0.994			2.25	0.422	1.65	-0.532	0.733	0.729	-4.5	-0.603			4.04	0.119	0.274	-0.574	-1.88	4.17	-1.47	0.728
-5.15	0.116	-1.05	2.01	-1.85	2.32	0.528	-1.42			2.23	1.29	1.58	-0.38	0.748	-0.101	-3.74	0.566			3.97	2.58	0.619	0.0515	0.0664	6.11	-1.11	0.699
-7.11	-1.22	0.115	2.44	-1.05	1.97	-0.308	-1.27			2.55	3.02	1.74	-1.17	0.724	1.16	-4.57	-0.099			4.65	0.505	0.971	0.624	-1.39	2.52	0.51	2.23
-5.08	-0.651	-0.762	3.3	-0.51	2.27	-1.67	-1.26			2.26	1.33	2.08	-2.28	1.07	1.6	-4.79	1.24			4.69	2.82	0.84	1.37	-3.27	2.57	-0.14	1.1
-4.59	-1.33	-0.485	3.78	0.446	2.15	1.32	-1.46			3.9	2	3.09	-2.36	0.989	0.896	-4.65	1.18			4.89	3.78	0.551	1.99	-3.59	4.56	-0.607	0.934
-6.26	-0.246	-1.74	3.45	0.724	0.88	0.761	-1.1			2.93	1.24	3.79	-1.07	0.063	-0.0577	-3.76	0.246			4.08	3.49	0.549	4.22	-3.32	4.63	-0.107	0.715
-5.88	-1.02	-0.692	2.41	0.312	0.562	-2.17	-1.42			3.73	0.912	3.93	-2.5	0.272	-1.58	-2.95	0.11			4.28	2.64	1.04	5.43	-0.916	5	-1.07	-0.364
-5.82	-0.639	-0.304	3.02	0.239	0.454	-1.58	-1.03			2.88	0.898	0.641	-1.55	-0.192	-2.11	-3.05	0.0938			3.12	1.24	-0.476	5.01	0.233	3.15	-0.407	0.455
-4.47	-0.456	0.491	3.31	-0.171	-0.0569	-0.786	-1.93			3.21	0.377	0.532	-1.24	-1.32	0.875	-4.14	1.25			5.1	1.15	1.11	5.86	-0.0995	1.53	-0.5	1.34
-3.83	0.213	0.58	3.07	0.328	1.93	-1.68	-1.33			2.94	0.184	1.44	-0.758	-1.07	0.221	-2.76	-0.416			3.61	2	-0.094	7.2	-2.02	3.48	-1.27	2.12
-2.53	-0.599	-1.59	3.71	0.544	0.172	-1.99	-1.25			3.36	0.628	1.77	0.407	-1.18	0.504	-4.23	0.799			3.88	2.37	0.405	6.25	-2.21	4.06	-1.01	1.7
-4.4	-0.471	-1.33	3.54	-0.81	1.98	-1.39	-1.12			1.88	2.04	0.802	0.444	-1.06	-0.152	-5.84	1.78			5.3	1.14	-0.0549	6.61	-1.68	4.64	-1.61	0.959
-4.61	-0.262	-1.91	3.27	0.608	0.945	-2.9	-1			2.8	2.06	2.07	-0.0808	-1.02	-0.721	-5.38	-0.156			4.59	1.85	0.791	6.64	-1.9	4.15	-1.96	0.759
-3.83	-0.209	-3.13	3.46	0.0527	1.64	-0.323	-1.02			2.08	2.17	0.958	0.432	-1.73	-0.4	-4.74	0.138			5.34	0.999	1.11	6.15	-1.22	4.17	-2.16	0.646
-1.95	-0.0499	-1.88	3.13	-0.391	1.91	0.729	-0.85			3.71	1.55	0.945	-0.251	-1.07	-1.19	-4.28	0.718			4.16	0.88	0.827	5.44	-1.27	2.86	0.359	1.38
-1.93	-0.75	-0.809	3.19	-0.332	1.43	0.0658	-0.58			2.76	1.26	1.51	-1.16	0.108	1.07	-2.75	1.31			3.12	0.668	0.812	4.97	-1.92	3.53	0.237	1.56
-1.88	-0.711	-1.13	3.4	-0.995	0.392	-1.42	-0.874			3.02	2.27	2.72	-2.84	-0.161	0.357	-2.83	2.09			4.31	0.689	-0.112	4.4	-2.35	3.05	-0.922	1.13
-3.89	-0.146	-0.34	3.1	-0.25	1.39	0.094	-1.2			2.46	1	2.83	-3.82	-0.119	-1.03	-3.07	1.43			4.32	2.88	-0.761	5.15	-1.8	3.41	-3.24	0.684
-4.09	-0.924	-0.291	3.21	0.147	-0.356	0.486	-0.233			1.89	2.21	0.525	-1.77	-1.51	-1.62	-3.92	2.04			3.88	1.65	-0.451	6.39	-1.5	3.67	-0.192	0.352
-3.17	0.11	-1.29	2.73	0.155	1.69	0.728	-1.67			1.23	2.89	2.91	-1.63	-0.831	-1.1	-2.52	1.14			4.05	2.68	2.56	6.37	-2.19	3.94	-0.0687	0.512
-5.4	-1.14	0.967	3.8	0.187	3.45	0.304	-1.19			2.98	1.7	1.03	-1.79	-1.71	-1.13	-3.95	2.66			2.08	2.64	0.168	7.92	-2.08	4.37	-0.511	-0.275
-3.06	-0.517	1.05	3.26	0.699	1.33	1.15	-1.84			3.82	0.889	3.57	-0.993	-0.614	-0.63	-4.6	1.7			4.76	2.49	0.702	6.6	-1.96	2.35	0.189	0.321
-3.26	-0.557	-1.96	3.71	-0.199	1.12	-0.943	-1.76			2.29	-0.427	2.7	-0.15	-0.843	-1.79	-3.68	1.07			2.74	1.6	0.708	6.09	-2.38	2.6	-1.2	-0.237
-3.33	-0.215	-0.758	3.39	1.43	0.56	-0.252	-2.34			2.59	-0.29	3.61	0.511	-0.292	-1.63	-5.7	1.81			3.86	1.17	1.63	7.29	-2.24	1.87	-0.326	-0.103
-3.42	-1.12	-2.07	2.87	1.19	2.73	1.98	-1.59			2.82	1.47	2.48	0.47	0.849	-2.26	-4.39	-0.487			3.28	2.17	-0.657	6.73	-1.93	2.52	0.871	0.697
-5.26	0.0893	0.372	2.11	0.526	0.775	2.88	-1.84			3.2	1.91	3.61	-0.0946	1.38	-1.5	-2.47	-1.2			2.61	1.52	0.358	6.83	-2.38	1.57	1.17	1.36
-4.51	-0.496	0.302	1.71	-0.147	2.37	3.56	-2.83			2.28	2.18	2.67	-1.52	0.882	-1.56	-4.97	-0.0993			2.12	1.6	1.12	7.27	-2.35	2.06	0.739	1.65
-3.77	-0.324	-2.03	2.9	-1.5	1.57	2.46	-2.63			2.86	2.27	2.19	-0.796	1.07	-2.25	-4.6	0.206			1.07	2	0.172	7.34	-1.84	0.519	-0.737	2.34
-3.86	-0.548	-0.832	3.83	-1.63	1.95	0.844	-2.07			2.4	1.25	0.477	-1.45	1.17	-1.76	-4.29	1.39			3.71	0.341	0.685	6.33	-1.72	-1.13	-0.413	0.456
-1.98	0.578	-0.384	3.37	-0.358	-0.118	0.764	-0.622			3.09	0.908	1.78	-1.27	0.846	-1.92	-4.05	1.04			4.15	-0.535	0.302	6.27	-2.32	1.41	-0.59	1.16
-1.98	-0.279	-1.53	3.37	-0.3	1.36	1.27	-1.48			3.38	1.98	4.65	-1.59	0.156	-0.566	-4.48	2.35			2.98	-1.97	-0.27	5.87	-2.3	1.19	-0.392	1.83
-1.68	0.837	-0.956	3.09	-0.216	0.732	3.37	-1.38			1.5	1.01	4.1	-0.5	0.745	0.666	-3.8	0.727			2.3	-0.493	0.518	6.64	-2.6	2.12	-0.8	1.03
-2.54	1.42	-0.681	2.59	-0.527	0.415	2.73	-1.97			2.11	0.663	2.06	-0.12	0.715	-1.42	-4.61	0.387			4.57	-0.174	0.898	7.12	-1.74	1.26	1.4	1.18
-4.2	0.745	-1.77	1.83	0.635	0.883	1.37	-1.42			0.807	-0.225	2.89	-0.765	0.643	-0.958	-4.53	0.517			4.93	0.273	2.83	6.23	-1.99	3.21	0.876	1.24
-3.03	0.251	-0.402	2.96	1.57	0.465	1.03	-1.6			2.67	1.08	2.14	0.0641	0.844	-1.25	-3.62	-0.328			2.67	-0.224	2.7	6.56	-2.5	2.13	1.03	-0.117
-4.01	0.51	-2.29	2.47	3.06	1.07	2.43	-2.08			3.11	2.39	4.8	0.724	1.06	-1.99	-5.79	-0.957			2.92	0.00791	-0.507	4.56	-2.22	2.09	-0.0896	-0.403
-5.21	0.341	0.216	2.47	2.86	0.886	1.81	-0.623			3.06	2.35	2.02	0.527	0.842	-1.21	-5.14	0.069			3.37	-1.19	0.478	5.11	-2.5	1.84	0.918	-0.168
-3.75	0.857	-1.76	2.23	0.6	-0.0204	1.88	-1.79			1.4	0.933	4.39	1.08	0.628	-0.385	-5.86	0.146			2.96	-1.54	1.32	6.68	-2.14	2.72	0.79	-1.41
-4.47	-0.78	-2.25	1.78	0.932	0.91	2.01	-1.08			2.77	1.02	3.64	0.996	1.05	-0.746	-4.72	-0.145			2.61	-0.857	2.17	6.19	-2.62	3.01	0.495	-1.93
-2.41	-0.44	-1.06	0.775	0.415	0.188	0.904	-0.857			1.71	1.34	1.33	0.17	0.531	-1.07	-5.1	-0.0234			0.109	0.547	1.76	6.13	-2.61	3.67	-0.053	-1.1
-4.5	-0.243	-1.1	1.55	2.02	1.14	2.8	-0.786			1.77	1.55	3.27	0.603	0.959	-0.367	-4.09	0.296			2.54	-0.718	0.854	6.63	-1.34	1.84	0.0692	-0.764
-4.45	-0.844	-0.776	1.62	2.25	0.139	2.52	-2.11			1.88	0.0535	2.09	1.18	1.01	-0.675	-4.6	0.334			1.29	-0.413	1.26	5.1	-2.4	1.85	-0.498	-1.23
-4.69	-0.71	-1.3	2.9	0.196	0.883	3.19	-1.25			2.47	-0.552	1.83	0.197	0.0654	-0.929	-4.78	-0.845			3.58	0.0047	0.89	4.36	-2.23	2.36	1.24	-0.734
-5.55	-0.226	-1.48	3.72	-0.357	0.921	1.68	-0.918			1.46	-0.96	2.58	-0.00425	-0.352	-1.39	-5.58	-0.956			2.54	0.948	0.737	4.42	-2.65	3.87	0.708	-0.318
-5.48	-0.525	-1.52	2.76	1.42	0.943	2.38	-0.952			1.23	-0.329	1.8	-1.18	-0.484	-2.84	-4.03	-0.238			2.9	-0.339	0.338	4.99	-1.77	1.95	1.72	0.0653
-3.82	-1.28	-0.809	0.772	1.14	1.65	2.21	-1.1			2.15	-0.991	0.11	-1.64	0.316	-1.68	-2.84	1.5			1.12	1.12	1.5	5.03	-2.16	1.83	1.58	-0.0514
-5.72	-1.26	-0.533	0.63	-0.417	4.07	1.21	-2.45			2.47	-0.587	1.58	-0.608	0.48	-2.65	-4.77	-0.0109			2.55	1.16	1.24	5.27	-2.8	0.791	0.65	-0.725
-5.89	-1.09	-0.739	0.859	-0.0612	3.87	2.06	-2.29			2.37	-0.442	1.05	-0.673	0.47	-1.57	-4.6	0.801			0.686	1.17	2.78	5.28	-1.44	1.71	0.42	-0.768
-4.61	-0.965	-1.77	1.99	-2.01	3	0.15	-1.63			1.89	-0.53	2.78	-0.263	0.646	-1.73	-5.85	-0.819			2.51	-0.49	0.642	4.91	-1.74	4.17	2.76	-0.764
-4.81	0.111	-2.12	1.85	-2.53	0.0855	1.21	-1.94			1.62	-0.667	3.2	-0.122	0.584	-2.84	-5.75	0.516			3.37	-0.434	0.394	4.26	-1.53	3.05	0.936	-0.321
-4.49	-0.39	0.199	2.19	-0.675	2.3	2.7	-1.11			2.08	-0.749	2.22	-0.858	0.133	-0.492	-5.18	-1.53			3.38	-0.442	1.74	4.74	-1.19	2.48	-1.47	-0.422
-4.65	-1.23	-0.555	1.83	0.373	2.58	1.47	-1.94			2.1	-0.189	1.82	-0.923	0.258	-3.2	-7	0.467			2.76	1.45	1.43	4.8	0.0571	2.47	0.718	-0.926
-4.56	-1.68	-1.29	1.9	2.42	1.5	3.1	-1.85			2.21	-0.221	2.4	-1.95	0.81	-2.54	-3.83	-0.641			3.99	0.32	1.55	4.52	0.329	2.31	-0.485	-0.46
-2.45	0.384	0.266	1.38	1.55	2.4	1.61	-1.07			2.62	0.575	1.25	-1.83	2.19	-1.65	-7.55	1.07			2.19	-1.02	1.18	3.24	-0.749	3.52	-0.43	-0.673
-4.28	-0.775	-1.38	1.78	1.78	2.4	1.57	-0.976			3.13	1.08	3.33	-1.52	2.72	-1.2	-4.02	0.464			3.06	-1.32	0.923	4.34	-1.51	1.83	-1.65	-1.3
-1.93	-0.859	-1.42	2.07	1.41	-0.0184	0.881	-0.853			3.71	0.478	0.409	-3.8	3.29	-0.87	-5.51	0.29			2.63	-1.09	1.91	4.01	-2.99	1.51	1.08	-1.4
-3.46	-1.43	-2.1	2.4	0.956	1.87	2.68	-1.49			3.41	-0.697	2	-1.93	2.83	-2.22	-4.78	0.311			2.11	-0.514	0.413	4.05	-1.53	3.27	0.652	-1.55
-2.11	-1.25	-1.58	2.56	0.848	0.307	0.665	-0.866			4.22	-1.19	0.567	-2.14	1.5	-0.219	-4.86	-0.00895			1.66	0.253	1.5	4.18	0.5	3.79	-0.273	-0.0998
-3.68	0.138	-3.15	2.81	0.297	-0.708	1.41	-1.79			3.37	-0.93	2.19	-1.81	0.881	-0.6	-5.8	0.218			3.46	1.01	0.879	4.01	-0.718	3.28	1.79	-1.33
