# Supplementary material for: Metabolic sensing in AgRP neurons integrates homeostatic state with dopamine signalling in the striatum
Source: eLife journal article supplement (doi:10.7554/elife.72668), 2022-01-12
Supplement: fig2-data1 [file Fig2J.xlsx]

## Sheet: Sheet1
	WT									KO
NFO	0.769271	1.39515	2.62997	2.57396	1.9771	1.7273	-0.256472			-1.02641	-0.525565	1.16574	0.629491	2.07211	0.347811	1.06169	0.0224539
Chow	3.52521	1.67412	4.36882	1.38467	3.01025	5.10018	2.4234			2.362	0.180862	2.40306	1.98597	1.46447	-0.0637936	-0.726462	1.81195
PB	3.19025	4.20701	7.61288	4.5057	8.29259	5.73701	4.25749			5.96348	1.60528	1.66078	2.93326	3.60476	2.86386	3.29585	2.95685
