# Supplementary material for: Metabolic sensing in AgRP neurons integrates homeostatic state with dopamine signalling in the striatum
Source: eLife journal article supplement (doi:10.7554/elife.72668), 2022-01-12
Supplement: fig2-data1 [file Fig2K.xlsx]

## Sheet: Sheet1
	WT									KO
NFO	-1.49028	0.644023	1.02574	1.03416	0.364878	0.893272	-1.64692			-2.72263	-0.644106	-1.03968	0.987331	-0.371449	0.317723	-0.508857	-0.694443
Chow	2.30756	0.7304	3.68234	-0.0991681	1.81409	4.93176	1.34222			3.20455	0.270852	2.35321	-0.298723	0.350191	-0.1722	-3.53996	0.246187
PB	0.393586	2.39583	6.68408	2.46526	3.20088	2.75024	2.80727			5.29754	0.811051	2.7982	1.74541	-0.111896	2.70292	0.643985	0.456202
