# Supplementary material for: Metabolic sensing in AgRP neurons integrates homeostatic state with dopamine signalling in the striatum
Source: eLife journal article supplement (doi:10.7554/elife.72668), 2022-01-12
Supplement: fig2-data1 [file Fig2L.xlsx]

## Sheet: Sheet1
WT								KO
-0.4	0.377	-0.217	0.383	-0.811				1.68	-0.446	-1.02	0.916	1.4	0.447	-0.344
-1.16	-0.756	-0.278	0.292	-1.3				1.6	-0.298	-0.52	0.883	0.27	-0.175	0.574
-0.991	-0.647	-0.421	0.663	-1.44				1.08	-0.15	-1.04	1.73	1.55	1.02	0.936
-1.25	-0.564	-1.57	1	-1.74				-0.192	-0.861	-0.699	1.88	0.27	2.27	0.742
-1.49	-0.0351	-1.14	-0.0793	-0.786				0.654	0.114	-1.47	1.76	2.36	0.784	0.912
-1.51	-0.178	-0.281	-0.175	-1.07				-0.503	0.092	-2	2.2	0.935	1.8	1.06
-1.18	-0.975	-1.59	1.22	-1.51				0.72	0.288	-1.91	2.48	0.323	-0.0608	1.58
-0.84	-0.464	0.176	0.373	-1.44				1.71	0.102	-1.75	2.08	-0.0395	-0.229	0.659
-1.16	-0.664	-0.663	0.459	-1.2				0.734	0.595	-1.41	1.94	0.435	1.29	0.949
-2.04	-0.636	-0.602	-1.59	-1.49				0.971	0.402	-0.473	1.85	1.31	-1.49	0.714
-1.4	-0.203	-0.854	1.2	-0.876				0.953	-0.689	-0.804	0.982	1.12	0.0521	0.892
-1.51	-0.0221	-1.7	-1.89	-1.11				-0.208	-0.159	-1	0.438	1.02	-0.0442	0.56
-1.94	0.969	-0.462	0.0521	-1.31				0.623	-1.02	-0.742	0.0176	0.809	0.966	0.697
-1.36	0.582	0.0815	-2.09	-0.712				-0.533	-1.23	-0.297	-0.446	1.02	0.848	0.477
-2.04	0.241	1.08	0.181	-0.27				-0.478	-0.921	-0.252	-0.237	1.06	0.0494	0.387
-1.71	-0.237	1.1	0.0987	-0.379				-0.0563	0.335	-1.35	0.043	-0.76	-0.427	1.43
-1.5	0.0346	0.234	0.0876	-1.37				-0.348	0.885	-0.948	0.0955	-0.596	-0.127	1.47
-0.154	0.401	0.696	0.195	-0.544				0.245	-0.367	-0.088	-0.601	0.781	-0.506	1.73
0.00796	0.2	1.01	1.21	-1.26				0.791	-0.102	-0.0263	-0.353	-0.175	-0.313	2.18
-0.509	-0.684	-0.0238	-0.948	-1.66				-0.00561	-0.667	-0.466	-0.643	-0.753	-0.354	1.43
-0.49	-0.613	0.16	-1.33	-1.1				-0.0521	0.387	-0.729	-1.1	-0.118	-1.52	1.5
-0.688	-0.13	-0.614	-0.0991	-0.0448				1.34	1.68	-0.602	0.15	-0.906	-0.454	0.879
-0.279	-0.634	0.0615	0.706	-1.11				0.0531	0.607	-0.849	0.927	-0.407	-0.927	1.58
-0.317	-0.767	-0.437	-0.249	-1.31				0.00324	1.43	-0.506	0.468	-3.34	0.167	1.41
-1.04	-0.825	-0.226	-0.49	-1.82				-0.228	1.16	-0.551	0.309	-0.301	0.297	0.786
-1.36	-1.06	-1.06	-0.186	-1.66				0.382	0.547	-0.406	0.203	-1.03	-0.629	1.62
-1.75	-0.377	-0.533	-0.532	-0.92				0.449	1.48	-0.326	-0.543	-0.96	0.26	1.14
-0.874	-0.795	1.03	-0.645	-1.23				0.499	1.41	-0.0137	0.344	-0.879	0.987	0.955
-0.758	-1.07	0.955	-0.266	-0.361				-0.446	2.37	-0.333	0.832	-0.409	1.4	0.207
-0.868	-1.19	0.398	-0.279	-1.66				-0.657	0.842	0.342	1.38	-1.43	-1.21	-0.0239
-1.21	-1.47	1.26	0.127	-1.97				-0.765	0.498	-0.11	1.22	-1.96	-0.0539	0.474
-1.35	-1.38	1.6	-0.996	-0.936				-1.02	0.519	0.378	1.31	-1.58	-0.905	0.836
-0.0966	-1.55	0.947	0.113	-1.25				0.442	0.558	0.214	0.806	-0.765	-0.833	-0.0278
-0.63	-1.29	1.15	-1.64	-0.357				0.916	0.118	0.887	0.832	-0.0925	-0.18	0.959
-0.146	-0.815	0.236	-2.32	-1.23				0.433	0.77	1.33	0.344	-0.503	0.0216	0.343
-0.207	-0.684	0.391	-1.82	-1.09				-0.175	-1.24	3.05	1.07	-0.854	-0.413	1.32
-0.231	-0.133	2.85	-0.164	-0.83				-1.52	-1.78	1.14	0.319	-1.01	-0.554	0.78
-0.126	-0.622	1.31	-0.624	-1.23				0.496	-0.564	1.38	0.144	-1.47	0.363	1.07
-0.323	-0.858	1.62	0.145	-0.055				0.0629	0.198	1.73	-0.589	-1.91	0.746	0.731
-0.107	0.418	1.19	1.16	0.495				-0.413	-0.184	1.22	-0.889	-0.957	-0.243	0.886
-0.653	1.17	1.25	0.243	0.548				0.31	-0.254	-0.237	-1.17	0.298	-0.755	0.386
-0.402	0.875	1.59	1.14	-0.151				0.32	-0.123	0.49	-1.41	-0.74	-0.444	-0.0767
0.118	1.24	0.551	-1.62	0.705				-0.0966	-1.14	0.655	-1.52	-1.51	0.336	0.572
0.557	0.218	1.47	-2.52	1.13				0.695	-0.232	-0.554	-1.12	-0.687	0.14	0.383
0.521	-0.275	0.305	-0.289	0.987				0.386	0.607	0.373	-0.667	0.776	-0.0118	0.64
0.0774	-0.373	1.06	-0.624	1.29				0.282	0.0875	0.378	-0.7	0.411	0.356	-0.42
0.775	-1.53	1.59	0.687	0.944				0.79	-0.692	0.0662	-0.668	0.3	-0.739	0.281
0.706	-0.266	0.982	0.385	0.862				0.907	0.195	-0.314	-1.42	-1.9	-0.474	0.693
0.428	-0.792	0.543	-0.973	0.902				-0.883	-0.393	-0.165	-1.01	1.01	-1.55	0.58
-0.0741	-0.122	0.958	0.14	1.68				-1.01	0.462	0.705	-0.714	-0.867	-1.13	0.713
0.665	-0.592	0.573	0.46	1.34				-0.601	0.489	0.764	-0.791	-0.0692	-0.836	1.14
0.229	-0.633	1.33	0.287	1.35				0.155	0.551	-0.421	-0.561	-1.31	0.545	0.292
0.0629	-1.26	1.23	0.406	1.53				-0.843	0.388	0.642	-1.25	-0.504	0.343	-0.651
0.545	-0.604	0.755	0.712	1.5				-1.36	0.0209	0.5	-1.13	-0.365	-0.16	0.49
0.322	-1.22	0.448	0.407	0.709				-1.32	-1.53	-0.0556	-1.09	0.123	-0.633	0.24
0.582	-0.852	0.987	0.00616	0.987				-0.229	-0.363	-0.432	-1.41	-0.424	0.43	-0.787
1.05	-0.316	0.861	-0.301	0.835				-1.19	-1.67	-0.253	-1.7	-0.246	-0.608	-0.228
1.38	0.363	-0.245	-2.93	0.898				0.571	-1.64	-1.09	-1.01	1.13	-0.329	-0.87
1.09	0.469	-1.22	0.943	0.868				-0.453	-1.14	-0.443	-1.22	0.472	-0.0925	-0.85
1.26	0.267	-0.274	1.85	0.903				-0.514	0.413	-1.39	-0.6	-1.54	1.91	-0.999
0.654	0.272	-0.451	0.97	0.745				-1.59	-1.03	-1.38	-1.27	0.153	0.399	-0.255
-0.124	0.254	-0.707	-0.993	-0.411				-0.524	0.298	-1.42	-1.18	1.62	1.37	-0.857
-0.655	-0.158	-0.798	-0.0537	1.13				-1.55	1.86	-1.62	-0.811	0.0568	1.1	-1.37
-0.722	-0.473	-0.424	-2.08	-0.298				-1.02	1.86	-1.44	-0.131	-0.887	1.37	-1.17
-0.534	-0.294	-0.211	1.42	0.491				-1.23	1.96	-1.67	-0.0584	-0.48	2.11	-1.4
-0.718	-0.181	0.476	0.837	1.09				-0.658	1.89	-1.41	0.182	-0.42	1.22	-1.27
0.287	0.322	1.47	0.371	0.136				-1.21	1.61	-1.31	0.764	0.162	1.45	-1.72
0.213	-0.0873	0.361	0.144	0.674				-2.35	1.82	-1.5	0.514	-0.236	1.2	-1.21
-0.0291	-0.277	-0.25	0.218	1.06				-1.23	1.9	-0.953	1.34	-0.084	1.24	-1.29
-0.381	-0.09	-1.34	-0.666	0.893				-2.21	1.26	-0.574	1.21	0.36	1.58	-1.01
-0.138	-0.149	0.294	0.915	0.43				-3.06	0.173	0.162	0.14	0.415	0.889	-0.515
-0.0568	-0.103	-0.788	0.399	0.075				-2.43	1.54	-0.321	0.853	-1.17	1.16	-0.92
0.415	-0.731	-0.233	0.784	0.302				-2.01	0.683	-0.307	1.5	1.22	1.13	-0.691
0.335	-1.29	0.087	-0.0352	0.968				0.693	0.495	-0.0511	0.794	1.06	1.1	-1.16
-0.486	-0.416	0.431	1.63	-0.0848				0.175	0.409	0.566	1.52	0.838	0.672	-0.822
0.2	-1.39	-0.198	0.658	-0.105				0.0478	-0.337	1.13	0.446	0.415	1.12	-0.693
0.0854	-0.77	1.06	-1.34	0.15				-0.177	0.696	0.813	0.0639	-0.813	0.731	-0.946
0.498	-0.318	0.5	-0.727	0.229				-0.418	-1.18	0.223	-0.0144	0.461	-0.625	-0.832
0.525	-0.428	0.46	-1.1	0.144				-0.0829	-0.129	0.0934	1.24	0.895	-0.845	-0.651
0.6	-0.963	0.41	0.0372	1.02				0.321	-0.614	0.377	0.0251	0.799	-0.798	-0.727
0.594	-0.514	-0.422	0.592	0.525				0.341	-0.773	0.747	0.555	0.261	-0.237	-1.33
0.965	0.325	0.316	-0.509	0.691				0.427	-1.05	0.893	0.262	0.659	0.303	-1.56
1.41	1.68	0.0809	1.38	0.0656				0.0906	-1.68	0.93	-0.352	2.46	-0.144	-2.46
1.38	1.39	-0.0697	1.15	-0.221				0.323	-0.18	1.03	0.135	2.21	1.07	-1.46
1.14	2.36	-1.32	0.934	0.0731				-0.244	-0.914	1.55	0.21	0.293	0.704	-1.3
1.42	2.48	-1.32	-0.397	-0.089				-0.501	-1.18	1.05	0.133	0.341	-0.993	-1.87
0.667	1.98	-0.912	-0.17	1.27				-0.223	-1.46	1.41	-0.226	1.22	-1.48	-2.08
1.35	1.65	-0.7	0.833	0.612				0.0217	-1.36	1.07	-1.1	0.475	-2.35	-1.25
1.09	2.05	-1.24	-0.412	1.13				-0.569	-1.71	1.52	-1.22	0.416	-1.53	-0.947
1.5	2.34	-1.59	0.127	0.738				0.792	-2.09	1.1	-0.932	-1.52	-2.14	-0.867
1.41	2.49	-2.21	1.6	0.703				1.42	-1.4	0.482	-1.26	-0.0423	-3.17	-0.417
1.69	2.11	-1.9	0.991	1.42				1.01	-0.754	0.344	-1.31	0.28	-1.31	0.0361
2	2.13	-2.41	-0.979	1.16				1.33	-0.468	0.919	-1.07	0.858	-1.38	-0.758
0.951	1.51	-1.21	1.35	1.97				0.903	-0.919	1.11	-0.349	-0.0581	-0.848	-0.791
1.5	1.06	-0.818	1.75	0.503				1.12	-0.552	1.07	-0.336	-0.6	-1.11	-0.12
1.55	0.0488	-1.17	0.858	0.891				0.761	0.198	0.526	-0.305	-0.389	0.418	-0.447
1.58	0.813	-0.645	-0.337	0.275				0.929	-1.08	0.762	-1.3	1.55	-0.39	-0.839
1.24	0.635	-1.46	-1.05	0.233				1.36	1.26	0.757	-0.667	0.394	0.217	-0.466
1.35	0.659	-0.58	0.103	0.877				1.54	-0.0617	1.86	-1.04	-0.15	-0.169	-0.145
1.56	1.78	-1.19	-0.711	0.603				2.46	0.237	1.56	-0.395	0.228	-0.303	0.341
1.43	1.62	-0.967	1.86	0.0531				2.07	0.0649	1.69	0.0282	0.929	-1.12	0.249
1.95	1.92	-1.18	-0.714	0.714				0.678	-0.533	1.04	0.181	-0.0136	-1.94	-0.0022
1.43	1.76	-0.843	-0.946	0.545				1.93	0.202	0.22	-0.0167	-1.16	-1.33	0.266
1.2	2.48	-1.36	0.475	-0.439				1.83	-1.51	0.842	-0.414	-0.967	-1.96	-0.0938
1.43	2.66	-0.931	0.748	0.0915				2.6	-0.946	-1.09	-0.805	-0.982	-1.74	-0.115
1.44	2.61	0.594	-0.247	0.728				2.49	-0.617	-0.414	-0.209	-0.22	-2.24	-0.293
1.17	2.57	-0.977	-0.715	0.594				3.32	-0.662	0.208	-0.28	-0.353	-1.35	0.0303
1.69	1.99	-1.83	0.0198	0.364				2.86	-1.23	0.791	-0.417	-0.0377	-1.7	0.501
1.41	1.74	-0.64	0.531	1.37				3	0.467	0.624	0.0533	1.69	-0.35	-0.513
1.31	1.83	0.0568	0.494	1.34				3.12	0.915	0.928	-0.397	1.28	0.196	0.153
2.12	1.29	0.522	1.27	0.0526				2.57	1.04	-0.208	0.317	0.165	-0.265	-0.447
1.64	1.42	0.62	0.644	-0.426				3.14	0.471	-0.7	-0.0386	-0.219	0.402	-0.784
1.21	2	0.39	0.54	0.918				3.41	1.75	0.219	0.262	1.26	0.935	-0.298
1.53	2.44	1.03	1.22	1.22				3.34	1.46	0.32	-0.394	0.818	0.00451	-0.635
1.34	2.58	1.31	-0.0466	0.176				4.36	0.558	1.13	-0.417	-0.0462	-0.826	-0.778
2.13	2.71	2.13	1.02	-0.0521				4.17	1.46	0.884	-0.789	1.71	0.0496	-0.998
2.09	2.48	3.18	0.92	0.809				3.22	1.2	0.879	-0.0326	2.85	-0.595	-0.284
2.03	1.74	2.36	1.04	0.448				4	1.3	1.22	0.368	0.779	-1	0.257
1.89	1.79	2.76	1.54	0.595				3	1.92	0.92	1.31	0.299	-0.165	-0.46
1.93	2.27	2.76	1.39	0.0461				3.41	1.34	0.276	0.507	0.885	-2.08	-0.153
1.53	1.45	2.5	2.28	-0.104				2.88	2.45	0.326	1.09	-0.854	-0.603	0.391
1.89	2.22	1.44	0.327	0.317				4.18	2.19	0.576	0.603	-0.943	-1.29	-0.257
2.26	2.37	2.14	1.35	0.616				3.67	2.16	0.132	0.404	-0.17	-2.13	0.402
3.13	1.54	1.15	2	0.366				3.8	0.876	0.121	0.678	1.2	-0.448	0.371
2.86	2.25	2.29	1.28	0.572				4.02	1.46	0.377	1.03	1.4	0.135	0.463
2.65	1.72	2.11	3.28	0.504				6.4	0.104	0.587	0.11	0.844	-0.62	-0.104
3.18	1.38	0.651	3.06	0.931				5.24	-0.657	0.772	-0.0735	1.96	1.84	0.0613
2.88	1.03	1.6	1.85	0.485				6.35	-0.0412	0.765	0.00746	-0.237	-0.17	0.35
3.38	0.387	2.37	2.54	-0.225				4.52	0.0787	0.599	-0.433	2.11	-0.817	0.0898
2.74	0.345	1.98	2.25	-0.768				2.72	-0.341	0.572	-0.145	-0.279	-1.08	0.41
3.04	1.11	2.18	3.41	0.722				2.15	-0.804	0.887	-0.931	1.57	-0.398	0.602
3.37	0.345	2.14	3.72	0.341				2.94	-0.112	0.108	-0.521	0.232	-0.647	0.717
3.58	0.736	1.39	3.99	0.5				1.36	0.0381	0.314	0.333	-1.15	-0.349	0.477
3.93	1.18	1.65	4.87	0.67				1.86	0.29	1.22	1.52	0.327	0.171	0.71
4.32	1.66	1.06	4.9	0.345				2.31	-0.794	1.49	1.5	-0.193	0.117	0.429
4.13	2.73	0.853	5.32	-0.347				3.07	-0.751	2.02	1.16	0.923	0.651	0.37
4.32	3.6	-0.163	2.98	0.0114				4.38	-0.121	2.14	0.706	1.05	0.913	0.439
4.37	3.63	0.0187	2.2	0.37				5.79	-0.788	2.24	1.41	-0.713	-1.72	0.381
4.27	4	0.303	4.05	-0.315				2.43	1.38	2.46	1.43	0.00522	-3	0.492
4.21	3.37	0.000168	5.01	-0.242				2.36	0.672	2.95	1.76	2.01	-1.96	0.317
4.73	3.89	0.679	4.38	0.543				2.56	1.05	2.22	1.7	-0.0569	-1.36	0.249
3.46	2.94	0.727	4.48	0.666				1.71	0.74	2.96	1.89	-0.124	-1.13	-0.275
4.14	2.97	0.855	4.45	-0.0234				2.59	-0.517	2.19	0.944	-0.508	-0.511	-0.101
4.02	2.98	-0.283	5.84	-0.458				2.33	-0.602	2.57	0.715	0.483	-0.957	-0.413
4.06	2.94	0.991	5.99	-0.243				2.77	0.114	3.17	1.17	1.68	-1.06	-0.487
4.35	1.86	1.81	6.78	0.07				3.03	0.396	3.09	2.21	1.56	-1.13	-0.329
4.56	1.87	1.65	1.6	-0.0748				2.57	0.685	3.36	2.96	3.1	-1.75	-0.854
3.87	1.22	1.62	2.9	-0.333				1.9	-0.155	3.7	2.59	1.47	-1.55	0.721
4.42	0.753	1.05	2.98	0.73				1.53	0.872	3.36	2.86	2.93	-0.451	0.312
4.41	0.124	0.635	4.72	-0.0358				1.74	0.286	2.99	3.33	2.9	-1.55	-0.0393
4.41	0.0141	1.12	3.46	-0.715				1.58	-0.881	3.33	2.46	2.56	-0.116	-0.311
4.36	0.143	1.11	2.68	-0.791				0.801	-0.869	3.62	2.17	2.83	-1.97	0.00187
4.46	1.38	1.54	2.41	-0.77				1.46	0.127	2.79	2.47	1.95	-1.8	-0.165
3.95	0.251	2.11	3.6	0.187				2.05	-0.134	3.26	2.49	2.95	-2.19	-0.91
3.19	1.43	2.85	1.92	0.319				2.26	-0.147	3.46	2.67	2.96	-0.682	0.118
4.29	0.856	2.4	2.85	0.88				2.92	0.349	3.32	2.62	3.22	-1.06	0.789
3.58	1.29	2.8	4.14	0.995				2.05	-0.443	3.64	1.54	2.94	-2.4	0.363
3.24	0.907	2.23	4.32	1.35				3.75	0.626	3.87	2.52	2.88	0.00649	-0.0602
3.81	0.658	1.8	4.11	1.01				4.23	0.558	4.34	2.25	3.88	-0.699	0.639
4.06	0.425	2.41	4.4	1.01				2.09	1.14	4.54	2.04	3.06	-0.757	0.656
3.85	1.88	1.42	4.65	0.278				1.53	0.557	4.21	2.08	3.35	-1.22	0.843
3.97	1.35	1.53	4.97	1.34				1.27	0.399	3.99	1.46	3.74	-0.536	0.771
4.21	2.11	0.768	5.27	0.936				-0.107	0.394	4.2	1.75	3.96	-0.165	0.529
3.58	3.01	2.12	5.84	1.26				0.236	1.39	3.75	1.05	3.68	-1.2	0.445
3.22	2.72	1.55	3.7	1.39				0.786	0.901	3.4	1.31	4.46	0.467	0.107
3.67	1.74	1.91	5.01	1.58				-0.442	2.12	4.28	1.03	3.74	-1.09	0.0735
3.6	3.08	1.76	4.59	2.06				1.34	3.11	3.9	1.62	2.23	-0.448	0.222
3.93	2.95	2.31	4.01	0.959				1.26	2.83	4.5	1.81	3.18	-0.498	-0.583
3.41	3.77	2.81	5.4	1.4				3.61	2.6	4.72	1.58	3.94	-1.03	0.0843
3.28	2.87	2.85	4.71	1.32				1.76	1.09	4.55	1.63	3.31	-0.235	0.28
2.99	2.73	3.36	4.36	1.29				2.34	0.207	4.56	2.18	2.59	0.00532	0.756
3.61	1.47	3.9	4.46	2.02				2.6	2.01	3.58	2.3	3.07	1.22	1.28
4.21	0.287	3.55	5.47	0.87				2.79	2.59	2.57	1.73	3.81	0.652	0.681
3.66	0.596	2.98	4.42	1.73				3.78	1.9	2.68	2.33	2.27	0.62	1.35
3.27	0.0568	3.93	5.69	1.57				5.06	2.22	1.7	2.15	4.37	1.45	2.54
3.01	0.127	3.57	5.45	1.31				4.58	1.45	1.92	2.53	4.38	0.224	2.93
2.53	-0.0549	3.71	3.88	0.957				4.31	3.11	1.58	2.42	1.63	2.03	3.3
3.1	-0.682	4.07	5.93	0.168				3.29	0.954	2.36	1.87	3.39	1.15	2.63
3.93	-0.218	3.49	6.65	1.31				3.49	2.54	1.23	1.99	2.02	0.487	2.6
3.84	-0.76	4.65	4.53	2.55				3.95	3.47	1.65	1.19	2.18	0.295	2.21
4.05	-0.855	4.28	6.18	2.26				4.41	4.17	2.69	1.48	3.76	-0.829	1.98
4.53	-1.96	4.33	5.22	2.66				3.9	3.22	2.44	1.23	2.93	0.321	2.3
2.92	0.299	5.56	7.36	2.76				7.48	3.84	2.37	0.6	2.66	1.62	2.19
2.56	1.65	7.16	7.15	1.96				6.82	3.11	1.65	0.572	2.32	1.36	2.46
2.69	2.48	7.65	4.13	1.82				7.76	2.75	1.67	0.557	1.71	1.75	2.33
2.31	2.27	6.85	6.15	2.21				7.97	2.75	1.88	0.265	3.86	0.139	2.99
3.17	2.35	7.85	5.4	2.17				7.14	2.3	2.3	0.174	2.96	-0.564	2.34
3.09	2.85	7.17	4.79	3.08				7.79	2.49	1.25	1.15	3.29	0.158	2.7
3.13	2.95	6.96	6.92	2.82				8.47	1.13	1.88	0.481	3.96	0.613	2.1
3.04	3.12	7.08	6.55	3.19				9.23	1.99	1.77	1.06	3.49	-2.4	2.99
2.96	3.05	7.68	6.93	2.82				8.78	1.8	2.91	1.98	2.34	-0.723	2.68
2.54	3.03	7.13	5.69	2.28				8.09	2.26	1.78	2.65	2.61	-1.28	2.71
3.88	2.64	7.73	9.22	3.04				7.78	2.49	1.67	2.73	3.89	0.637	2.66
4.09	3.54	8.13	6.67	3.91				7.88	4.07	1.78	3.4	3.54	0.157	2.13
4.13	2.89	7.61	6	3.76				8.29	1.75	2.33	3.16	1.36	1.44	1.23
3.24	2.85	8.55	5.97	3.44				7.83	1.78	2.7	4.67	2.92	1.44	1.94
3.41	2.45	6.94	6.3	2.76				8.65	2.11	1.84	3.13	3.53	0.0154	1.06
4.44	2.14	6.22	6.3	3.16				7.47	2.14	2.23	3.22	3.22	0.713	1.61
3.95	3.21	7	7.81	4				8.37	1.39	2.77	2.86	1.83	0.603	1.52
4.58	3.15	8.13	6.6	2.84				8.02	1.2	2.95	3.13	2.79	2.03	2.08
4.69	3.7	7.77	4.62	3.94				8.02	2.23	2.34	2.83	3.47	2.1	3.07
4.57	3.68	6.45	5.43	4.13				7.7	1.46	2.28	2.22	2.29	2.21	3.12
4.41	3.73	6.11	5.76	3.8				7.68	1.85	3.35	2.04	1.48	1.67	3.57
3.95	4.61	5.21	6.99	3.88				8.51	2.55	3.67	2.09	3.7	-0.919	3.12
4.12	4.78	6.59	7.29	3.86				8.24	2.7	3.74	1.79	3.42	0.552	2.56
4.24	3.59	6.57	6.95	3.79				7.56	2.57	3.53	2.21	3.04	-0.0518	2.79
4.12	4.94	5.69	5.7	4.52				7.47	2.58	3.11	1.6	3.24	-0.00735	1.99
4.23	5.27	5.91	8.54	4.09				7.67	3.17	2.82	2.03	3.25	-0.594	1.54
4.27	4.06	7.11	6.62	3.22				6.76	3.18	3.51	1.6	2.81	0.167	0.784
3.79	4.3	7.03	5.45	4.44				7.71	1.56	3.09	2.31	1.94	-1.1	0.705
4	4.48	6.89	7.24	3.8				8.16	2.84	2.87	2.03	3.15	1.44	0.251
3.18	5.25	6.64	7.92	4.21				6.56	1.69	3.26	2.24	2.94	-0.0584	0.769
3.39	4.28	6.4	8.33	3.33				8.06	1.96	2.64	2.39	2.48	0.484	-0.0145
3.4	4.74	6.55	7.29	3.54				6.88	1.4	2.8	2.13	2.9	-0.114	0.672
3.37	4.47	6.63	6.03	2.86				7.18	2.25	2.52	2.34	1.52	-0.693	0.637
3.51	4.54	6.19	7.09	3.05				6.39	2.66	2.88	1.83	1.99	-0.449	1.97
2.77	4.39	6.67	7.07	2.7				6.79	2.6	1.79	2.08	2.7	-0.775	1.33
2.81	5.44	5.6	7.66	3.31				7.89	2.87	1.58	2.71	1.12	-0.427	1.86
2.99	4.8	5.71	7.61	3.69				7.22	3.08	1.61	2.34	1.2	-0.128	1.23
2.5	4.52	6.79	7.6	2.72				6.5	2.72	1.99	2.58	1.95	-0.225	1.28
2.32	3.56	6.24	10.8	1.99				6.73	2.77	1.5	2.58	1.47	-1.11	1.03
2.93	3.92	4.7	8.24	2.97				6	1.5	2.13	3.67	0.55	-0.624	0.895
2.93	3.58	5.57	9.68	2.92				7.28	1.45	1.87	2.91	1.53	0.241	1.47
2.59	4.24	6.07	6.68	4.08				6.46	1.01	2.43	3.09	1.05	-1.02	1.63
2.28	3.77	5.3	7.87	3.71				7.03	1.48	2.27	3.02	1.72	-1.42	1.42
3.04	4.4	5.07	6.73	3.44				6.36	3.05	1.87	3.27	3.25	-1.48	1.04
2.97	3.46	5.3	6.76	2.96				7.81	1.9	2.66	2.82	0.915	0.763	1.09
3	3.51	5.28	6.36	3.1				6.84	3.23	2.2	3.05	-0.0337	0.352	1.77
2.35	3.29	6.21	7.33	3.2				7.07	1.97	2.93	2.32	-0.376	-1.23	1.47
2.98	2.48	6.55	8.04	3.2				7.41	2.3	2.34	2.08	0.248	1.03	1.51
2.48	2.37	4.82	8.23	2.82				8.38	1.54	2.27	2.11	0.719	-0.00249	1.25
2.84	2.37	4.01	6.25	3.25				7.39	2.41	2.29	2.53	1.09	0.951	0.584
2.49	3.02	4.64	6.12	4.03				6.86	2.03	2.17	2.05	-0.438	-0.774	0.743
2.4	2.45	5.18	8.34	4.2				7.24	1.98	2.34	2.4	0.701	0.195	1.03
2.02	1.89	5.38	6.91	3.65				7.89	2.46	2.63	1.7	0.719	-0.902	1.18
2.43	2.59	5.6	6.84	3.51				7.39	2.39	2.26	2.32	0.97	-1.05	0.976
2.14	2.33	5.68	6.14	3.4				8.25	1.31	2.51	1.78	1.73	-1.52	0.591
2.57	2.35	5.18	7.04	3.76				8.03	2.5	3.03	2.12	2.56	0.0991	1.5
3.22	3.05	5.44	6.97	3.92				7.81	1.79	2.04	2.4	0.894	-1.54	1.43
2.49	2.95	4.81	5.65	3.16				6.41	2.74	2.02	2	0.878	-0.821	1.22
2.71	3.35	5.64	5.25	3.56				7.76	1.35	3.04	2.08	2	-0.902	1.4
2.77	3.27	5.48	5.04	2.94				8.59	1.74	2.86	1.76	1.9	-1.54	1.66
2.74	3.87	4.48	6.87	3.17				8.25	1.12	2.74	2.1	0.652	-0.983	1.68
2.79	3.37	5.08	6.83	3.07				7.11	1.57	2.24	1.73	1.4	-0.585	2.07
2.81	3.05	4.92	8.33	3.53				7.22	1.37	2.16	2.24	1.49	0.0901	2.13
3.13	3.13	5.51	7.3	3.78				6.14	1.7	2.25	2.19	-0.234	-0.584	2.36
3.01	3.49	5.39	6.4	3.29				6.16	0.766	2.53	2.51	-0.998	-0.924	2.03
3.2	4.17	5.3	7.41	3.64				5.97	2.18	2.39	2.08	0.438	-0.613	1.26
3	4.36	4.63	8.46	4.16				7.39	1.71	2.76	2.26	1.43	-1.36	2.13
2.46	3.59	5.1	7.43	4.52				8.08	1.09	2.73	1.73	1.2	0.177	2.21
2.32	3.36	4.13	6.52	3.9				7.19	1.11	1.92	1.38	0.0171	0.334	1.58
2.3	3.75	4.52	7.43	3.39				7.19	1.57	2.98	1.43	-0.872	-1.97	1.45
2.87	3.31	5.04	7.62	4.01				7.53	1.41	2.49	1.51	1.25	0.0906	1.24
2.42	3.82	4.28	8.18	3.28				7.82	1.64	2.55	1.56	0.433	-1.45	1.8
3.06	3.03	4.84	7.33	4.15				8.13	1.95	2.64	2.45	1.55	-1.44	1.35
2.3	3.38	4.8	6.69	4.07				7.87	2.21	2.63	1.95	1.48	-0.776	2.04
2.6	3.33	5.73	6.07	4.13				8.44	0.989	2.68	1.34	-0.869	-1.62	2.16
2.13	3.06	5.19	7.18	4.67				7.23	2.05	2.18	0.977	0.888	-2.02	2.4
1.97	2.67	4.63	6.58	3.42				7.83	2.22	2.76	1.1	0.159	-1.66	2.68
2.29	3.5	5.27	8.15	4.67				7.75	2.61	2.59	1.03	0.215	-0.158	1.83
2.25	3.53	4.73	6.91	5.02				7.89	1.06	2.52	0.838	1.13	-0.655	1.93
2.74	3.17	5.05	8.46	3.51				7.23	1.77	2.08	2.02	-0.00518	-0.659	1.35
2.25	2.84	5.65	5.92	4.1				7.85	2.1	2.26	1.53	1.12	-0.972	2.11
2.18	3.37	6.25	5.93	3.74				8.28	1.63	1.86	1.91	0.62	-0.411	2.3
2.5	2.93	6.29	7.69	3.84				6.66	2.49	1.49	1.4	0.314	-1.15	2.35
2.62	3.15	6.29	7.75	3.67				7.89	1.76	2.17	2.42	0.941	-1.49	2.23
2.13	3.81	6.16	7.83	3.89				7.52	1.51	2.36	1.64	-0.182	0.457	1.65
2.82	3.74	8.03	8.8	3.55				7.06	2.98	2.05	2.91	1.65	-0.533	1.87
2.63	3.92	5.71	8.02	4.12				7.53	2.56	2.61	2.65	0.0987	-0.584	1.62
2.45	4.25	5.97	8.43	4.08				6.69	2.97	2.43	2.96	0.65	-1.27	1.68
2.36	4.79	7.11	7.82	4.24				5.77	2.38	2.33	2.26	-0.508	-0.0167	1.85
2.49	3.56	6.08	7.07	3.54				5.39	2.51	2.44	1.54	-0.0481	-0.306	1.71
2.06	3.32	5.87	6.48	3.86				5.8	3.83	2.21	1.33	1.02	-1.98	1.92
2.3	3.4	6.01	8.21	3.45				5.86	1.85	2.4	1.13	-0.0646	0.391	1.47
3.07	3.36	5.38	7.27	3.12				5.02	2.17	2.03	1.5	-0.304	-0.0906	1.07
2.54	3.14	6.36	7.17	4.25				4.62	2.12	1.94	1.43	-1.05	-0.954	1.19
2.6	3.9	6.28	6.94	4.93				5.37	2.88	2.08	1.78	-0.649	-1.64	1.24
3.01	3.53	5.26	7.23	4.17				5.85	2.25	2.22	1.5	-0.296	0.21	1.13
2.91	3.55	6.67	7.58	4.07				4.55	2.69	2.15	2.16	0.627	-1.09	0.714
2.61	3.65	6.68	7.62	3.62				6.14	2.4	2.3	1.66	0.682	-0.345	1.08
2.91	4	4.8	7.18	4.05				5.12	1.79	1.92	1.92	-1.13	-0.13	0.119
2.46	3.43	4.77	7.5	3.69				5.11	1.83	1.38	2.07	-1.61	-1.33	1.04
2.21	3.34	5.89	6.42	4.09				4.58	2.25	2.16	1.92	-1.47	-1.49	0.825
2.32	3.79	5.78	9	3.42				7.47	2.48	1.92	1.56	-0.743	-0.975	0.864
1.65	3.17	4.98	7.39	4.26				6.09	2.89	2.19	0.686	0.21	-0.877	0.836
2.5	3.26	3.92	6.62	4.51				5.03	2.04	1.55	1.26	-0.463	-1.05	0.808
2.16	3.13	3.7	4.55	3.8				5.44	1.51	1.57	1.17	0.307	-0.164	0.615
2.62	2.72	5.11	6.24	3.25				5.9	2.04	1.92	1.05	-0.401	-1.29	0.813
2.15	3.22	5.15	5.22	4.08				5.15	2.82	1.99	1.24	-1.9	-0.109	0.938
2.32	3.43	6.29	5.52	3.73				5.04	1.67	2.5	1.9	-0.287	-0.95	1.41
2.53	3.56	5.81	6.56	4.23				4.41	2.78	2.48	1.39	-0.178	0.457	1.54
2.28	3.67	5.48	5.53	3.25				5.22	3.02	2.46	1.48	1.33	-1.08	1.09
2.19	3.55	5.54	5.55	4.25				4.9	2.59	2.07	1.46	0.139	-1.15	0.683
2.17	3.33	6.02	6.39	4.23				4.98	3.27	2.48	1.06	0.644	-1.65	0.509
2.28	3.94	4.97	7.02	4.6				5.28	3.29	2.09	1.79	0.771	-1.33	0.814
2.31	3.22	5.13	7.44	4.28				5.97	2.76	2.06	1.28	-0.443	-0.195	0.807
1.84	3.2	4.38	7.73	4.49				5.13	2.84	2.46	0.955	0.562	-0.494	1.12
1.72	3.35	4.8	4.48	4.64				4.55	2.14	2.27	1.38	0.416	-1.06	0.276
1.21	3.98	4.75	7.69	5.02				4.29	2.5	2.4	0.633	-0.176	-1.38	0.576
2.93	4.42	6.25	7.04	5.2				3.71	3.04	2.43	0.838	-0.0114	-0.812	2.02
1.8	4.78	5.2	7.99	4.78				4.76	2.95	2.57	0.64	-0.213	-0.245	1.36
2.27	4.34	4.77	5.67	4.99				4.34	3.15	2.34	0.571	-0.763	-0.546	0.639
2.58	4.35	5.05	5.95	5.02				5.1	3.84	2.34	0.551	-0.61	0.129	1.27
2.74	4.26	4.88	6.7	4.67				5.7	3.64	2.55	0.0196	0.246	0.132	1.42
3.07	4.62	4.24	7.31	5.11				5.15	2.58	2.64	0.584	0.191	1.12	0.462
2.36	4.07	5	6.92	4.87				4.5	2.97	3.04	0.398	0.384	0.394	1.13
2.43	4.49	5.39	5.08	4.52				5.58	4.04	2.09	0.376	0.143	0.00427	0.752
2.27	4.23	5.36	5.94	5.23				5.49	3.31	2.19	1.08	-1.07	-1.81	0.886
2.07	4.49	4.6	8.09	5.12				5.17	3.4	2.35	0.694	-0.25	-0.284	0.799
2	5	6.54	8.18	5.91				6.48	4.02	2.02	0.974	-0.101	-0.661	0.62
1.94	5.01	8.4	5.67	3.82				5.92	3.57	2.79	0.997	2.01	1.37	-0.234
2.33	5.23	7.57	5.11	4.96				4.73	4.35	2.58	1.47	1.32	0.713	-0.165
2.59	5.84	7.49	6.73	5.26				4.93	4.19	2.73	1.83	-0.0792	-0.534	-1.02
1.57	5.84	7.26	5.64	5.73				4.92	2.91	2.58	1.75	-0.431	-0.84	-1.27
2.24	6.22	7.19	6.51	5.35				4.88	3.68	2.53	1.88	-0.526	0.0267	-1.55
2.32	6.18	7.25	6.78	4.79				5.15	3.85	2.51	2.35	-0.953	0.694	-0.974
1.95	6.58	8.53	6.33	5.22				3.28	2.82	2.77	2.03	0.395	-0.0373	0.302
1.85	5.61	10	5.3	4.51				3.81	3.69	1.88	1.45	0.315	-0.933	-0.294
1.28	5.34	10.8	6.39	5.63				3.99	3.45	2.18	1.34	-2.28	-0.905	1.08
2.27	5.26	11.6	6.23	5.35				4.11	3.11	1.93	1.13	-2.01	-0.974	1.12
2.34	4.49	11.3	6.3	5.23				4.05	3.88	1.94	1.19	-1.7	-0.898	0.766
1.73	5	11.2	5.96	5.55				3.78	3.58	2.19	0.911	-1.7	0.535	0.35
1.79	5.56	12.2	5.75	5.16				4.32	2.98	2.4	0.782	-0.671	0.277	0.701
1.23	6.29	12.6	6.35	5.8				3.16	3.94	2.21	0.561	-0.296	1.17	1.02
1.19	5.31	12.5	6.89	4.91				2.39	4.14	2.23	-0.0899	-0.897	1.52	1.9
1.29	5.79	12.5	7.22	4.93				4.02	3.44	1.94	-0.361	1.38	-0.595	-0.519
1.73	5.63	13.8	7.29	5.08				3.83	3.25	2.3	-0.321	0.0441	-0.843	-1.03
1.36	4.81	13.1	7.45	4.21				3.74	2.93	3	-0.482	0.316	-0.0947	-0.899
2.35	5.08	13.1	4.93	5.65				3.26	3.41	2.57	-0.35	-0.968	-1.72	-1.24
1.72	5.48	12.9	7.83	5.1				4.29	2.51	2.7	-0.736	-0.144	-1.43	-1.45
1.84	4.84	11.5	7.11	4.67				4.7	3.19	2.65	0.148	-0.000848	-1.67	-0.847
1.88	5.5	11	6.75	5.21				4.22	2.46	2.58	0.0796	-0.51	-1.21	-1.51
2.4	5.55	10.3	3.61	5.85				3.71	3.21	2.2	-0.342	-1.24	-1.72	-1.17
2.57	5.02	10.2	5.49	5.41				4.35	3.2	2.4	0.0284	-1.6	-1.15	-1.17
1.73	5.85	10.7	4.26	5.58				4.33	5.27	1.81	0.444	-2.51	-1.66	0.553
1.87	4.92	10.6	5.7	4.62				2.82	2.82	2.34	0.709	-1.69	-2.32	0.0555
2.01	4.77	11.7	5.5	4.14				3.23	4.13	2.32	0.182	0.291	0.878	0.188
2.48	4.45	13.1	7.6	4.39				2.93	4.6	2.82	-0.0463	-0.291	0.416	0.328
1.85	4.18	11.6	6	5.41				3.03	3.9	2.83	-0.546	-1.48	0.486	0.543
1.8	4.5	11.8	6.08	4.24				2.99	4.01	2.64	-0.88	-1.36	-1.48	-0.388
2.16	4.98	12.4	5.44	4.17				2.25	3.71	2.23	-0.695	-1.81	-0.766	0.0989
1.34	4.67	12.9	5.8	3.73				1.04	4.33	2.09	-0.0768	-2.03	-1.28	0.619
1.51	5.2	12.9	7.03	4.21				2.79	3.01	2.31	-0.492	-1.56	-0.878	0.187
0.984	5.53	13.3	6.07	4.39				2.97	3.99	2.77	-0.843	-0.446	-0.223	0.799
1.63	5.39	12.8	3.71	3.96				3.11	3.48	1.93	-0.758	-0.506	-0.604	0.744
1.96	5.38	11.4	5.85	4.86				2.53	3.61	2.28	0.34	-0.767	-0.635	0.794
1.43	4.46	10.3	7.44	4.6				2.4	3.43	1.94	0.655	-1.44	-2.32	0.837
1.37	5.49	11.8	6.83	5.31				3.49	4.52	1.57	0.647	-1.92	-2.05	1.33
1.87	4.92	11.8	6.41	4.56				4.15	3.74	1.96	0.552	-2.01	-0.556	0.696
1.4	4.79	12	6.13	5.3				2.35	4.28	1.61	0.431	0.00796	-0.562	1.81
1.29	4.73	10.2	8.24	5.46				3.12	4.76	1.57	0.992	-1.24	-0.294	1.72
1.69	4.69	11.1	5.85	4.85				3.29	3.39	1.83	1.15	-1.59	-1.17	1.7
1.71	4.64	11	5.46	4.57				2.21	2.87	2.05	1.55	-1.92	-2.2	1.76
2.42	4.44	10.6	6.4	4.81				3.12	3.62	2	1.3	-1.9	-1.33	1.61
1.86	4.53	10.3	4.94	5.31				2	2.45	2.07	1.13	-1.26	-0.749	1.67
2.8	4.67	9.55	6.62	6.06				3.36	3.24	1.28	1.67	-2.46	-0.735	1.38
2.16	5.58	9.7	5.91	5.4				4.55	3.86	1.1	2.06	-0.827	-0.375	1.56
2.21	5.05	9.82	6.92	5.5				3.95	3.64	0.917	1.79	-0.73	-1.45	1.19
2.88	4.76	10.4	6.8	5.14				3.08	3.98	1.49	1.84	-1.18	-0.0829	1.63
3.15	4.4	9.24	7	4.23				3.36	4.47	1.15	2	-0.539	0.0215	1.49
3.37	3.87	9.63	5.44	3.83				4.65	3.49	1.54	0.941	-3.07	0.437	1.06
3.13	3.69	9.93	5.15	3.63				4.43	3.45	1.43	1.47	-1.3	-0.992	0.276
3.3	2.99	10.5	4.34	4.32				4.4	3.99	1.06	1.51	-1.66	-1.01	1.37
2.87	3.67	9.43	3.93	4.96				3.94	3.26	1.43	1.61	-0.542	-1.37	1.23
3	3.75	8.65	4.75	4.12				4.43	3.18	1.47	1.6	-0.195	-2.28	0.278
2.69	4.2	7.58	5.4	4.47				3.15	3.66	0.945	2.02	0.252	-2.28	0.303
3.25	4.67	8.39	4.84	4.69				3.46	3.28	0.361	1.23	-1.55	0.633	0.566
2.46	4.25	8.21	6.14	4.38				3.22	3.23	0.508	0.784	-1.01	-2.41	0.964
2.27	4.82	8.1	4.96	4.5				3.14	3.28	1.14	1.64	-0.461	-2.78	1.8
2.19	5.13	7.19	4.44	3.47				1.69	4.61	1.29	2.06	-1.1	-1.96	1.87
2.56	5.56	8.78	6.08	4.18				3.46	3.71	1.2	2.62	-1.11	-1.52	2.39
2.99	5.81	8.61	6.2	4.06				2.62	2.99	0.218	2.5	-0.0562	-1.67	2.38
2.73	5.39	5.7	5.48	3.94				4.01	2.49	0.504	2.42	-1.45	-0.854	1.52
2.36	5.69	8.29	7.01	2.71				4.26	3.16	0.785	1.88	-1.91	-1.5	1.76
2.56	5.6	8.56	4.23	2.29				2.95	3.33	0.706	1.53	-1.07	-1.66	1.44
2.95	5.32	8.96	3.42	3.48				2.75	2.29	0.967	2.11	-2.61	-0.947	1.81
2.61	5.48	7.84	5.3	3.54				1.06	2.96	1.53	1.7	-0.239	-1.95	1.14
2.85	4.86	7.14	4.53	2.41				1.8	2.63	1.6	1.07	-1.96	-0.499	0.0426
2.71	4.75	7.73	6.61	2.48				2.6	2.91	1.44	1.41	-0.653	0.163	0.24
2.7	4.6	9.18	6.43	3.39				2.37	3.74	0.94	2.59	-0.0592	0.349	0.483
2.33	5.29	8.32	4.52	3.73				1.9	3.33	1.87	2.07	-0.945	0.0185	0.266
2.16	6.13	7.54	3.31	3.42				0.345	3.28	1.54	2.52	-1.6	-1.19	-0.194
1.97	6.23	6.13	3.97	3.74				0.849	4.51	0.846	2.41	-0.318	-0.348	-0.275
2.09	5.98	6.33	4.88	3.99				-0.23	4.85	0.853	1.64	0.387	-1.11	0.288
2.35	5.87	6.25	4.97	4.37				0.18	5.12	0.396	1.9	-1.88	-1.26	0.825
1.52	5.68	6.83	3.62	3.81				-0.965	5.88	1.14	2.64	-1.74	-2.19	0.409
1.25	5.13	7.95	4.57	4.13				0.643	6.43	0.759	1.93	-2.33	-1.51	0.653
1.53	5.55	7.21	2.86	3				0.109	5.86	1.57	2.53	-1.66	-0.476	1.36
1.17	5.38	5.74	6.5	1.81				-0.556	5.26	1.42	1.82	-0.579	-0.547	0.664
1.26	5.1	4.15	5.35	2.15				-0.563	4.08	1.79	1.83	-1.05	-1.34	0.604
1.76	4.84	4.2	4.85	2.51				-0.876	6.34	1.47	1.72	0.349	0.803	0.502
2.28	4.78	4.2	4.03	3.06				-1.04	6.06	1.83	2.63	-1.49	-2.23	-0.0198
2.24	4.49	4.23	4.04	3.34				0.672	5.59	1.65	2.32	-1.11	0.0129	-0.21
1.75	3.78	3.73	5.45	2.6				-0.251	4.3	1.08	1.68	-1.61	0.731	0.0664
2.2	5.16	4.75	5.64	3.1				0.48	5.51	2.11	2.09	-1.48	-1.7	0.111
2.23	4.69	4.14	3.08	3.43				-0.713	5.43	1.34	1.81	-0.142	-1.45	-0.3
1.62	4.49	5.54	4.43	2.41				-1.62	6.09	1.26	1.88	-0.306	-0.602	0.00265
2.14	5.22	6.45	3.63	2.49				-1.75	6.16	1.67	1.24	-1.17	-1.2	-0.246
2.79	5.42	5.15	4.5	2.76				-1.32	6.57	1.47	0.833	-1.84	-1.01	-0.227
2.96	5.26	4.98	4.68	3.9				-1.39	4.98	2.38	0.445	-1.24	-0.398	-0.689
2.45	6.35	5.1	5.63	3.36				-1.01	5.82	2.37	0.521	-1.07	0.891	-1.58
2.69	5.48	4.04	5.05	3.54				-1.07	7.1	2.73	-0.123	-0.76	0.38	-0.748
2.35	4.17	6.06	5.01	4.03				-0.589	5.49	3.43	0.44	-0.486	-0.789	-0.285
2.76	4.5	6.95	4.43	2.54				-0.487	6.03	3.32	0.928	-0.602	0.573	-0.76
2.47	4.45	7.52	3.27	2.54				-0.389	7.16	3.13	0.612	-1.77	0.162	-0.658
2.67	5.06	7.22	3	2.54				-0.498	4.94	3.16	0.675	-0.434	-0.798	-1.05
2.4	5.33	9.5	4.74	3.07				0.00222	5.51	2.8	1.33	-1.31	1.29	-0.0289
2.2	4.6	9.08	3.57	3.83				-0.413	5.39	2.19	1.62	-1.65	0.257	0.204
1.98	5.26	9.17	3.91	4.41				0.168	4.97	2.34	1.31	-2.54	0.227	0.297
1.63	5.47	9.94	4.89	3.43				-1.37	3.28	1.66	0.642	-0.623	1.61	0.384
1.8	5.69	10.6	6.19	3.95				-0.824	3.65	1.68	1.12	-1.16	1.28	0.711
1.72	5.57	8.46	5.12	3.63				-0.683	4.42	2.7	1.33	-0.721	0.487	0.525
1.76	5.65	9.17	4.66	4.43				-0.934	3.83	2.38	0.598	-0.587	1.23	-0.11
1.61	5.56	9.47	4.16	4.17				-1.02	5.44	1.89	0.298	-2.07	-0.581	-0.216
1.72	5.33	9.34	3.79	3.03				-1.19	4.39	1.74	-0.178	-1.99	-1.55	-0.234
1.29	5.96	9.53	5.33	4.17				-0.804	3.68	2.46	0.626	-2.69	-0.0576	-0.344
2.22	5.78	8.64	4.45	4.2				-0.328	3.59	3.14	0.545	-1.96	-0.198	-0.902
3.3	5.49	10.8	4.7	2.87				-0.85	4.02	3.13	-0.135	-1.61	-0.535	-0.737
3.1	6.12	9.01	3.15	3.95				-1.03	4.38	1.85	0.398	-0.617	-0.646	-0.986
2.43	4.32	9.73	2.32	2.62				-2.65	3.54	2.19	0.627	0.391	-0.213	-0.11
2.85	4.82	9.36	2.98	3.59				-0.738	3.29	1.99	1.2	-0.409	0.0515	-0.0691
2.17	5.2	8.55	3.83	3.59				0.35	3.53	1.38	0.744	-1.8	0.999	-0.311
2.51	4.43	7.2	4.86	4.44				1.1	1.84	2	1.79	-1.83	-0.176	0.00886
1.94	4.74	6.57	2.1	4.41				-0.864	3.61	1.86	0.923	-1.45	0.621	-0.285
2.23	4.06	7.73	4.43	3.26				-0.722	3.03	2.19	0.537	-1.38	-1.08	-1.03
2.4	5.71	6.39	4.06	2.57				-0.615	2.49	1.93	0.541	-2.02	1.25	0.365
2.62	5.1	6.64	3.21	2.15				-2.16	1.1	1.89	0.865	0.343	1.24	0.142
2.19	4.92	6.83	4.07	2.36				-0.997	3.58	1.79	1.69	-0.44	1.73	-0.599
2.69	5.13	5.74	3.8	2.5				-1.06	3.85	2.25	1.08	-1.3	0.865	-0.0741
2.3	4.67	6.89	1.83	2.86				-1.64	4.81	1.63	1.33	-0.658	1.51	-0.732
3.43	4.52	6.01	3.5	1.95				-0.838	4.45	2.71	1.25	-0.538	1.48	0.103
4.01	4.47	4.92	4.91	2.94				-2.43	5.04	1.78	0.769	-1.65	1.69	0.551
4.31	5.55	4.97	4.22	1.41				-2.18	5.87	2.19	0.512	-2.32	1.29	-0.115
3.84	6.08	6.21	3.93	2.24				-2.63	6.32	2.49	-0.242	-1.29	0.23	-0.229
3.37	5.47	7.13	3.3	2.61				-2.25	5.73	2.52	-0.701	-0.44	0.523	-0.0853
3.75	5.2	8.17	4.92	2.57				-1.26	4.84	3.15	-1.06	-0.44	-1.1	0.0359
3.14	5.4	7.91	5.29	3.43				-1.4	4	3.76	-0.855	0.591	-0.357	0.774
3.34	5.69	6.12	4.74	1.57				-0.982	4.96	2.4	-0.868	-0.775	0.123	0.311
2.79	5.34	7.98	4.29	1.56				-0.674	4.52	2.73	-1.02	-0.895	0.253	-0.21
3.31	5.95	7.42	3.77	1.22				-0.156	4.39	2.47	-1.13	-0.685	0.293	-0.176
4.56	5.57	7.54	3.28	2.18				-1.18	4.47	2.5	-0.632	-1.19	0.334	-0.944
3.45	6.35	8.18	4.29	1.59				-0.395	5.1	2.7	-1.23	-0.771	1.93	-1.21
2.38	6.87	6.48	3.34	1.32				0.307	4.02	2.41	-0.722	-1.24	-0.965	-1.58
1.92	5.65	7.93	4.06	3.06				-0.1	2.43	2.84	-1.73	-2.67	0.0759	-1.71
1.09	6.2	6.85	4.37	1.69				-0.0721	2.13	2.15	-1.24	-1.84	1.18	-0.713
1.4	6.66	6.6	3.05	2.51				-0.52	1.64	2.59	-0.797	-1.51	0.281	-0.692
1.83	5.76	6.6	2.98	1.93				-0.259	2.15	2.75	-0.0398	0.277	-0.0816	-0.512
2.57	6.16	5.91	3.97	1.47				1.24	2.28	4.05	-0.683	-0.875	1.15	-0.935
1.55	6.24	6.33	4.14	1.32				0.698	0.955	3.22	-0.89	-1.17	0.76	-0.694
1.42	6.22	7.68	3.17	2.22				0.866	2.84	2.71	-0.251	0.541	0.367	-1.35
-0.0838	6.16	6.76	3.09	1.31				0.389	5.21	1.79	0.185	-1.14	0.648	-0.45
-0.0594	5.83	6.83	3.55	2.27				-0.739	5.63	2.35	0.298	0.0378	2.43	-1.1
0.212	5.91	5.01	2.82	1.8				0.386	5.02	2.24	0.713	-0.203	2.24	-0.869
0.649	6.05	4.69	3.24	1.5				0.31	5.21	2.26	1.02	-0.395	1.16	-1.09
1.14	5.69	4.65	3.16	0.891				2.65	5.27	1.83	0.413	-1.64	2.78	0.448
1.39	6.45	5.79	4.42	2.2				2.49	5.96	2.29	0.303	-0.26	1.9	-1.14
0.906	5.63	4.31	3.88	2.68				1.47	5.22	2.26	-0.0592	-1.26	1.95	-1.27
0.359	5.91	4.9	5.92	2.19				0.73	4.53	1.87	0.25	-0.97	1.26	-2
-0.129	5.01	4.34	2.68	3.33				0.865	4.6	1.64	0.45	-0.883	1.6	-0.22
0.0786	6.22	3.65	4.98	2.29				2.3	4.87	1.96	0.8	-1.33	-0.509	0.161
-0.158	5.45	3.88	4.26	1.54				3	3.42	2.33	0.516	-1.84	0.826	-0.253
0.688	6.5	4.23	4.02	1.43				3.16	2.92	2.36	0.679	-2.58	0.665	-0.756
2.24	6.2	4.16	3.61	2.14				2.43	4.23	2.9	1.05	-1.56	-0.529	-0.447
1.82	5.79	4.99	4.05	2.06				2.75	3.8	2.38	1.2	-1.68	-0.0953	-0.615
1.84	5.95	4.71	4.74	2.03				2.77	4.43	2.12	1.37	-1.25	0.412	-1
1.47	5.42	3.55	3.92	2.43				2.87	3.89	1.94	1.25	-1.58	1.33	-0.371
0.918	5.41	3.73	2.81	2.57				4.02	2.78	2.04	0.55	-1.4	0.626	-0.968
1.16	6.04	2.98	3.8	2.98				4	2.72	1.53	0.431	0.115	0.747	-1.9
1.07	5.86	2.79	4.16	2.88				3.04	2.08	1.3	0.108	-2.1	-1.16	-1.04
0.971	6.46	3.61	2.59	1.97				3.93	3.41	0.945	-0.248	-1.59	-0.264	-2.41
1.73	6.33	2.9	2.79	3.16				2.05	2.77	1.1	-0.535	-1.4	-1.22	-1.81
2.03	7	4.49	3.7	3.07				2.62	1.18	0.545	-0.267	-1.98	-0.127	-1.66
1.73	5.62	3.41	4.67	2.75				3.45	1.74	1.58	-0.413	-2.13	-1.75	-1.46
1.67	6.92	1.27	3.43	2.91				3.76	2.36	2.65	-0.52	-2.5	-0.00686	-1.43
0.707	5.83	3.96	4.63	2.17				3.8	0.95	2.48	-0.73	-1.31	-1.74	-1.38
1.22	5.98	2.2	3.94	2.65				2.77	2.02	2.98	-0.394	-0.339	-0.546	-1.37
1.07	6.01	2.92	4.45	2.18				4.17	2.59	2.56	-0.82	-1.67	-1.91	-1.08
0.85	5.75	4.19	3.55	3.11				3.76	2.99	1.99	-0.622	-1.36	-1.55	-0.667
0.711	5.74	3.73	1.72	2.29				3.12	3.1	0.783	-0.858	-0.895	-0.77	-1.06
0.772	4.7	3.64	2.97	2.09				2.15	0.872	0.643	-0.624	-1.14	-0.288	-0.819
0.181	4.34	3.47	4.34	3.05				2.21	2.49	1.23	-1.19	1.09	0.0831	-1.36
-0.601	4.66	3	5.67	2.93				2.88	2.37	1.39	-1.01	-1.43	0.245	-0.752
0.0561	5.31	2.68	4.21	3.46				3.98	2.8	1.27	-1.54	-0.555	0.378	-0.56
-1.23	5.41	3.14	2.22	2.85				2.7	1.35	1.63	-1.38	-2	0.231	-0.521
0.426	5.12	3.43	4.13	3.13				2.62	2.58	1.23	-0.812	-0.79	0.565	-1.33
0.179	4.92	4.12	3.39	1.81				4.34	1.77	1.54	-0.813	-1.62	0.0622	-0.805
0.506	5.31	4.28	3.45	2.44				3.21	2.63	1.52	-0.84	-0.111	1.12	-0.544
0.13	5.42	5.17	5.03	2.7				4.06	2.35	1.39	-0.507	-0.863	1.24	-1.46
-0.00907	5.94	3.48	3.15	2.75				3.77	1.46	1.32	0.291	-1.42	1.38	-1.1
-0.193	5.87	3.81	3.19	3.31				2.83	2.25	2.11	0.419	-0.277	1.17	-1.46
-0.418	5.82	3.29	4.26	2.69				1.43	2.77	1.23	0.375	-1.83	1.57	-2.21
0.932	6.72	3.61	2.87	2.69				2.07	2.88	0.441	0.325	-0.468	0.266	-0.99
0.881	7.23	4.03	4.35	2.52				1.36	1.47	1.03	0.431	-2.13	0.775	0.0973
0.667	7.42	4.29	2.04	2.75				-0.454	2.07	1.4	0.708	-0.557	-0.952	0.299
0.149	6.8	3.92	2.84	2.64				-1.76	3.26	1.66	0.349	-1.61	-0.843	-0.182
0.877	6.51	3.52	5.52	2.28				-2.08	3.45	2.05	1.2	-1.81	-0.575	-0.28
0.47	5.27	3.41	4.11	3.32				-0.702	4.56	1.96	0.655	-1.89	-0.1	-0.936
0.544	5.03	3.83	3.82	3.34				-2.28	2.68	1.89	0.248	-1.41	-1.28	-0.531
1.36	4.85	3.69	4.77	2.8				-0.324	3.14	1.32	0.0508	-2.27	-0.0707	0.11
0.553	5.03	2.27	4.22	3.6				-1.05	3.48	1.49	0.305	-3.01	-0.456	0.291
0.366	4.88	0.592	1.87	2.75				-1.43	4.6	1.25	0.851	-1.81	-1.01	0.0363
0.189	5.28	1.65	4.31	3.24				-1.53	3.77	1.62	0.715	-0.528	-0.998	0.137
0.945	4.29	2.51	3.23	3.27				-2.71	3.53	2.1	0.738	-2.15	0.118	0.0736
0.738	4.29	2.62	3.48	3.73				-3.11	2.78	1.71	0.988	-1.34	0.187	-0.0589
0.959	4.29	2.41	2.82	4.14				-2.09	4.9	1.14	0.97	-1.05	-1.32	-0.0525
1	4.82	3.19	5.26	3.91				-0.697	3.14	1.52	0.363	-1.9	-1.45	-1.9
0.663	4.37	2.87	3.32	2.76				-0.796	3.59	0.796	0.387	-1.29	0.14	-1.63
-0.0296	5.24	2.69	4.22	3.25				-0.901	2.68	1	-0.133	-0.975	-0.335	-1.87
0.775	5.38	3.04	2.44	3.14				-0.487	1.66	1.24	0.326	-0.525	-0.425	-1.62
0.259	5.03	2.98	4.48	2.04				-1.33	2.83	0.716	0.277	-0.0182	-1.46	-1.37
0.716	4.73	1.98	4.22	2.41				-2.29	3.45	1.15	0.39	-1.45	-0.647	-3.09
0.881	4.6	3.32	3.61	2.31				-2.82	3.36	0.776	-0.149	-1.49	-1.98	-2.66
0.424	4.44	2.46	3.01	2.77				-1.06	3.24	0.819	0.721	-0.48	-0.601	-2.41
0.364	5.06	3.2	2.91	2.79				-1.84	2.4	2.04	1.06	-0.311	-1.47	-1.64
0.768	5.18	2.82	3.48	1.42				0.869	3.15	1.66	0.967	-2.56	-1.78	-1.99
0.491	5.32	2.05	4.26	2.04				-0.0171	3.95	1.77	1.39	-2.49	-0.571	-1.7
0.884	5.06	1.69	4.72	1.87				-0.7	4.27	2.47	1.9	-1.68	-0.529	-2.6
0.485	4.87	1.62	3.15	2.13				0.92	4.43	2.08	3.09	-0.433	-1.53	-1.65
-0.464	4.5	0.887	2.75	2.09				-1.15	3.97	2.1	1.73	-1.57	-0.637	-1.84
-0.169	4.57	1.24	4.32	2.64				-1.51	2.83	1.76	1.3	-2	-1.14	-1.7
-0.476	3.91	1.71	4.03	2.46				-2.29	3.36	1.09	1.95	-2.85	-1.91	-1.77
0.194	4.19	1.47	2.4	2.53				-0.231	3.91	-0.273	2.22	-1.85	-0.93	-1.34
-0.482	4.46	1.69	2.74	2.44				0.0202	3.22	0.0464	1.19	-1.5	-1.05	-1.73
-0.319	5.06	1.37	2.91	1.63				-0.953	3.35	0.388	1.19	-1.55	-1.8	-1.16
1.17	3.76	1.72	4.81	2.31				-1.79	3.39	-0.367	1.43	-2.2	-0.414	-2.12
0.756	4.28	2.05	2.01	2.46				-1.9	3.35	0.623	1.34	-2.84	-0.141	-1.24
0.76	4.09	2.86	1.65	2.14				-0.976	1.9	0.639	1.23	-2.7	-1.88	-1.72
0.278	4.51	3.59	3.71	2.48				-1.19	3.31	0.16	1.53	-2.61	-0.3	-1.98
0.138	5.11	2.59	4.59	2.85				-0.938	3.71	0.598	1.26	-2.69	-0.378	-1.74
0.547	4.68	2.3	3.71	2.14				-0.198	4.1	1.04	1.15	-2.6	-0.144	-1.48
0.283	4.71	2.34	4.08	2.16				0.305	3.38	0.813	1.9	-2.34	-1.11	-0.845
-0.117	5.32	3.31	4.29	2.28				-1.61	4	1.13	1.28	-1.94	-0.7	-1.36
0.0571	5.27	2.66	3.46	1.82				-1.41	2.05	0.867	0.824	-2.41	0.634	-0.583
1.17	4.81	2.77	3.58	2.38				-0.561	2.17	0.861	0.551	-1.87	-0.323	-1.14
1.87	4.65	2.88	2.62	1.17				0.172	2.19	0.382	0.766	-1.16	-0.724	-1.13
2.34	3.42	2.75	3.3	1.09				0.163	3.72	0.438	1.57	-1.91	-0.192	-1.58
2.64	3.78	3.3	1.82	1.23				-0.251	3.79	0.717	1.13	-1.34	-1.14	-0.803
2.7	3.95	2.86	4.67	1.55				0.0189	2.91	1.02	0.983	-2.52	-1.16	-1.26
2.8	4.5	1.9	3.12	2.03				-0.197	4.23	0.691	-0.213	-1.7	-1.9	-1.08
2.42	4	2.88	3.28	2.4				0.877	4.79	0.477	-0.648	-2.19	-0.605	-1.79
2.58	3.9	1.92	4.75	1.64				1.11	4.51	-0.0526	-0.955	-1.43	-1.31	-1.52
2.24	4.54	1.44	3.28	1.74				-0.0527	3.57	0.174	-0.186	-0.888	-0.129	-1.84
2.79	4.39	1.65	2.71	1.23				1.79	3.31	0.129	-0.0767	-1.25	0.125	-1.81
2.89	3.66	1.57	2.01	1.26				0.518	4.98	0.766	0.971	-2.23	-0.473	-2.26
2.55	4.42	1.17	2.86	1.02				0.656	4.64	0.244	2.48	-1.96	0.19	-2.17
2.37	4.31	-0.18	5.25	0.942				-0.382	3.86	0.149	1.84	-2.84	-0.917	-1.45
2.85	4.14	1.75	1.84	0.899				0.221	4.01	0.145	1.52	-1.54	-1.46	-1.38
2.36	4.37	1.04	2.32	1.25				-0.569	3.72	0.546	1.45	-2.32	-0.755	-1.33
1.12	4.22	1.76	1.53	1.51				-0.198	3.47	0.258	0.889	-1.79	-1.13	-1.97
0.987	3.87	0.567	2.74	1.38				-0.059	4.4	0.873	0.392	-0.855	-1.78	-2.3
0.364	3.83	0.72	3.48	-0.00547				0.42	4.07	1.7	0.373	-1.56	-1.51	-2.56
0.633	4.31	1.15	2.93	1.05				-1.26	4.15	1.09	-0.0105	-2.61	-0.365	-2.84
0.669	3.83	0.376	2.56	0.117				-0.634	3.73	1.76	-0.892	-1.25	-0.825	-2.07
1.58	2.77	0.55	3.13	1.03				0.266	4.33	1.1	-0.483	-1.81	-1.72	-2.75
1.38	2.97	0.201	4.09	1.84				-0.105	4.66	1.01	-0.177	-1.71	0.204	-2.81
0.732	3.3	0.767	2.36	1.29				-0.885	3.66	0.957	-0.181	-2.57	-1.08	-2.19
0.794	3.21	0.59	2.23	1.72				-0.379	3.79	1.13	-0.393	-2.12	0.327	-2.57
0.971	3.35	0.513	3.29	1.52				-1.04	4.61	0.293	-0.606	-2.5	-1.31	-2.23
0.736	3.11	0.621	1.52	0.912				-1.29	4.82	0.486	0.516	-3.28	-1.25	-1.53
0.949	3.66	-0.162	2.78	1.46				-0.457	4.85	0.824	0.184	-4.29	-0.973	-1.48
0.876	4.24	0.915	3.91	0.828				0.196	4.99	0.544	0.976	-3.05	-1.68	-1.52
1.61	4.49	-0.106	1.62	1.46				-1.11	4.18	-0.135	1.72	-2.39	-2.48	-1.49
1.77	4.97	0.304	3.84	1.06				0.195	4.93	0.383	1.48	-3.24	-1.88	-0.852
1.59	4.78	2.28	0.688	1.89				-0.64	5	0.607	1.17	-3.75	-2.12	-0.505
2.33	4.16	0.403	3.35	1.58				-0.691	4.1	0.517	1.66	-2.56	-0.889	-0.983
2.63	4.03	-0.116	3.74	1.74				-0.965	4.51	1.44	0.412	-2.52	-2.6	-0.158
1.34	4.03	-0.452	3.21	1.44				-0.418	3.1	1.57	-0.938	-3.1	-2.46	-0.61
2.01	4.2	0.547	1.68	2.04				-0.544	3.85	1.1	-0.909	-2.15	-2.75	-0.319
2.31	4.56	-0.22	2.67	1.5				-0.459	4.45	-0.57	-0.957	-1.42	-2.35	-0.518
1.92	4.57	-0.36	0.701	0.163				-0.36	3.52	-0.195	-1.01	-2.1	-1.52	-1.06
0.655	4.32	0.515	2.41	0.877				-1.12	4.38	-0.87	-0.866	-0.642	-1.53	-0.878
-0.311	3.98	0.106	3.32	1.29				-1.07	4.37	0.146	-0.688	-0.916	-2.34	-0.355
-0.716	3.18	-0.504	2.68	1.74				-1.8	2.72	0.552	-0.39	-2.19	-1.88	-0.285
-0.0848	3.15	-0.635	1.37	1.77				-0.3	2.6	0.383	-0.485	-1.63	-1.33	-1.03
0.965	3.46	-1.23	1.22	1.08				-2.46	1.77	-0.143	0.686	-2.09	-1.57	-1.35
1.13	3.32	0.0579	1.99	-0.307				-2.55	1.72	0.26	0.925	-1.37	-1.27	-1.19
0.923	3.79	-1.59	-0.0568	-0.144				-2.39	1.73	1.17	1.61	-1.51	-1.38	-1.22
0.308	3.17	-0.958	1.32	-0.0849				-2.77	1.03	1.07	1.62	-2.06	-3.02	-0.433
0.0902	3.93	-0.431	2.86	0.403				-1.12	2.86	1.26	1.92	-1.78	-1.92	-1.14
0.24	3.86	0.572	2.48	0.231				-2.04	4.85	0.782	1.58	-1.9	-1.65	-1.04
0.735	3.55	0.0965	1.44	0.73				-1.13	3.73	1.02	1.29	-0.43	-2.07	-1.59
1.95	3.6	-0.00333	0.432	-0.426				-0.388	3.7	1.22	1.01	-0.798	-2.46	-2.16
1.4	3.49	0.255	1.17	0.781				-0.133	3.63	0.175	0.694	-1.07	-1.95	-1.7
1.45	3.47	0.426	2.75	1.47				-0.795	3.51	0.425	0.928	-1.77	-0.688	-2.05
0.159	4.4	-0.109	2.13	0.734				-0.446	3.09	0.241	1.06	-0.54	-1.18	-1.73
-0.26	5.41	0.645	0.839	1.64				-0.907	3.6	0.781	0.471	-0.723	-1.25	-1.39
-0.0177	5.34	2.48	0.698	1.48				-0.205	4.96	0.689	0.225	-0.569	-0.248	-1.89
-0.258	4.21	1.55	1.34	1.11				0.641	3.42	0.602	0.484	-0.906	-1.3	-1.43
0.0782	2.88	1.64	1.56	0.43				-0.0524	3.6	1.12	1.02	-0.982	-0.85	-1.49
0.026	2.57	0.34	0.972	0.652				-0.784	2.84	0.452	1.34	-1.15	-0.256	-2.26
-0.116	3.6	1.23	1.92	1.03				-0.997	3.2	1.07	0.664	-1.48	-1.52	-2.31
-0.515	3.57	1.29	2.16	0.812				0.306	3.67	1	1.48	-1.43	-2.95	-1.79
-0.218	2.88	1.25	1.85	0.498				-1.19	3.6	0.63	1.01	0.0371	-2.2	-1.97
-0.724	3.45	-0.307	3.18	1.03				-1.38	3.85	0.571	0.17	-0.807	-1.75	-1.74
-0.749	3.5	0.0389	2.27	0.57				-2.21	4.42	0.409	0.221	-1.89	0.172	-1.89
-0.363	3.36	1	2.2	0.183				-1.06	2.26	0.905	0.0504	-2.48	-1.04	-1.96
-0.0022	3.07	-0.109	2.57	0.667				-2.03	3.27	1.01	0.598	-1.54	-1.99	-1.84
0.0692	3	-0.267	3.96	0.254				-1.65	3.53	1.26	0.241	-2.16	-1.69	-2.17
1.41	2.95	0.834	2.15	0.408				-1.52	3.17	1.38	0.606	-1.38	-1.31	-2.08
2.19	3.22	-0.0154	0.854	0.61				-1.02	2.25	1.39	0.0452	-3.91	-1.33	-1.55
2.38	4.11	0.752	0.386	1.6				-1.4	3.12	1.15	0.848	-4.04	-0.774	-1.25
2.26	3.27	0.422	2.01	1.21				-1.12	3.48	0.979	0.694	-1.98	-2.1	-1.69
1.85	2.97	0.174	1.5	0.128				-0.877	3.52	0.233	0.952	-2.97	-1.95	-1.45
2.38	2.32	0.258	1.93	0.939				-2.08	3.4	0.22	0.189	-2.82	-1.24	-1.47
0.631	1.64	0.43	1.67	0.356				-2.42	2.58	0.434	0.031	-3.17	-1.87	-1.63
0.445	1.95	0.976	1.88	-0.205				-1.76	2.72	0.959	1.1	-1.93	-1.09	-2.05
0.394	2.18	1.76	2	0.43				-0.49	2.11	1.28	1.11	-2.55	-1.97	-1.47
0.524	2.33	0.939	3.12	-0.0229				-1.82	2.57	0.875	1.57	-3.46	-2.28	-1.05
1.14	2.45	1.03	1.88	-0.122				-1.15	2.78	0.453	1.91	-2.54	-1.25	-1.45
0.348	2.79	0.579	2.11	0.0995				-0.193	2.64	0.654	1.08	-3.07	-2.47	-1.31
0.478	2.39	0.129	1.98	1.22				0.149	2.87	0.579	1.39	-4.2	-1.55	-0.605
-0.228	2.47	-0.628	-0.0614	0.736				1.15	2.67	0.877	1.67	-4.17	-0.773	-1.01
-0.011	2.66	-0.0829	0.793	2.04				-0.436	2.51	0.938	1.68	-4.2	-2.49	-1.17
1.37	1.97	-0.0322	2.35	1.29				-2.32	2.74	1.04	1.12	-3.83	-1.02	-0.942
0.784	2.27	-0.169	3.44	0.273				-2.09	3.45	1.27	0.978	-4.39	-1.74	-1.75
1.41	2.5	0.464	-0.862	0.604				-0.527	3.57	1.1	1.41	-3.7	-0.596	-1.1
0.778	1.72	-0.437	1.03	0.803				-0.681	3.59	0.951	0.921	-3.89	-0.638	-1.79
1.17	3.38	0.194	0.666	0.539				0.326	3.44	1.65	1.33	-3.36	-0.426	-1.66
1.75	2.95	0.423	2.14	-0.0343				-0.495	3.34	0.875	1.08	-3.28	-1.47	-2.17
1.82	2.48	-0.156	-0.416	-0.0366				-0.96	4.66	1.69	0.762	-1.8	-0.0384	-0.684
2.36	2.1	0.0991	1.31	0.228				0.82	3.66	1.87	-0.0718	-1.87	1.66	-1.74
2.5	2.04	-0.172	-1.2	0.485				-0.887	3.6	2.06	-0.176	-1.92	2.91	-1.93
2.58	2.14	-0.487	1.07	0.517				-2.24	2.61	1.61	0.532	-1.75	1.06	-1.81
1.26	1.22	0.184	-0.501	0.943				-2.34	2.59	1	0.648	-3.39	1.72	-1.44
0.351	2.37	0.146	0.679	0.135				-2.04	3.29	1.11	0.647	-1.59	0.265	-1.18
0.0409	1.75	-0.2	1.56	1.01				-1.33	2.3	0.818	0.468	-2.58	1.54	-1.53
0.401	1.11	0.855	0.2	0.366				-0.85	1.6	1.3	0.412	-1.23	1.91	-1.18
0.0507	1.62	0.968	1.52	0.692				0.278	1.85	1.56	0.391	-1.62	2.01	-1.01
0.314	1.53	2.42	-1.16	0.727				-0.532	1.11	0.99	1.07	-1.21	-0.346	-1.52
0.0117	2.46	2.14	-0.0764	0.433				-0.94	1.8	1.17	0.541	-3.69	0.0857	-0.433
0.939	2.39	3.13	1.09	-0.277				-0.792	2.22	1	1.08	-3.6	0.809	-1.33
1.27	3.47	1.41	1.31	0.701				0.396	1.25	0.931	0.749	-2.58	-0.0175	-1.4
0.731	4.01	-0.233	2.46	0.0584				-0.513	1.29	1.25	1.09	-3.31	0.349	-2.41
1.27	4.29	0.897	1.33	0.772				1.87	2.58	0.208	1.3	-2.48	0.573	-2.03
0.684	3.63	-0.448	0.899	0.507				0.83	3.22	0.837	1.28	-2.83	0.611	-1.57
0.795	3.33	-0.559	0.18	1.01				1.2	3.15	0.548	1.7	-2.18	1.03	-2.54
0.375	3.57	-0.74	2.8	0.76				2.16	2.32	0.837	1.48	-1.96	-0.253	-2.3
0.903	3.4	-1.18	0.28	0.0829				0.157	3.09	0.701	1.51	-3.21	1.88	-1.75
0.0695	3.76	-0.531	1.85	-0.352				0.363	3.34	0.447	1.11	-3.77	0.656	-1.44
0.589	3.9	-0.196	3	0.169				-0.124	2.14	0.0559	0.829	-3.57	0.522	-1.54
0.169	3.8	-1.01	0.886	0.277				1.76	2.92	-0.246	1.07	-3.63	0.84	-2.13
-0.0994	3.55	-1.39	0.234	-0.973				0.971	3.54	-0.687	0.872	-3.13	1.69	-1.61
-0.373	2.25	-0.865	2.61	1.09				0.315	2.2	-0.682	0.506	-3.93	0.556	-1.87
0.0189	2.45	-1.34	2.3	-0.0886				-0.168	1.8	-0.59	0.238	-4.3	1.33	-2.9
0.524	3.12	0.852	2.29	0.156				0.759	1.37	-0.13	0.0241	-3.53	1.1	-2.03
0.0629	3.25	-0.147	0.161	0.978				-0.775	1.89	0.428	0.0428	-2.74	0.798	-2.13
0.516	2.7	-1.22	2.57	0.196				0.881	2.18	0.747	-0.395	-2.62	2.09	-1.9
1.13	2.86	0.509	1.94	0.345				1.91	3.86	0.179	-0.265	-2.5	0.923	-2.72
1.72	2.54	-0.00684	1.43	-0.0896				3.31	2.76	-0.424	-0.65	-1.94	1.45	-1.87
2.81	3.05	0.145	0.616	-0.793				2.09	3.11	-0.838	-0.281	-3.26	1.25	-2.89
1.68	2.9	0.801	1.58	0.077				3.24	2.45	-0.29	0.23	-1.86	0.725	-1.98
1.62	2.89	1.22	1.59	-0.407				3.21	3.64	-0.695	0.937	-3.7	1.1	-2.83
0.703	2.44	-0.468	1.35	-1.16				2.36	3.01	-0.3	0.281	-2.03	1.17	-2.37
0.943	1.79	-0.369	2.16	0.729				1.45	3.55	0.23	-0.158	-2.4	2.16	-1.81
0.649	1.15	-1.12	2.1	-0.295				1.91	2.67	0.0295	-0.489	-3.38	1.99	-2.41
0.652	1.5	-0.544	-0.616	0.268				2.22	2.47	0.0872	0.401	-3.25	2.11	-2.42
0.799	1.84	-0.166	2.38	0.000206				1.49	3.28	0.00656	1	-3.29	1.8	-2.52
0.631	2.07	-1.01	-1.07	-0.267				2.62	3.31	0.126	0.911	-2.21	0.914	-2.11
0.52	1.2	-1.23	1.8	-0.233				2.22	3.38	-0.482	1.22	-2.13	0.68	-1.98
1.47	0.195	-0.799	2.77	-0.364				2.42	3.6	0.0271	2.01	-2.55	1.52	-2.42
0.798	0.647	0.0827	0.00477	-0.329				3.98	3.49	0.605	1.4	-2.63	-0.266	-2.16
0.0706	0.963	0.0339	1.18	-0.754				2.54	4.85	0.466	0.539	-2.5	0.68	-2
0.0407	1.79	0.353	1.07	-0.328				2.24	3.66	0.0835	0.58	-3.65	-0.111	-2.67
0.614	1.89	-0.426	2.59	-1.33				2.66	3.2	-0.427	1.09	-3.3	-0.116	-2.53
0.953	2.44	-0.966	0.815	-0.0783				3.35	2.72	-0.165	0.605	-2.37	-1.59	-3.04
0.844	1.05	-2.19	1.62	-0.951				2.78	3.45	-0.351	0.458	-0.981	-1.54	-2.59
1.1	1.08	-1.4	-0.223	-1.15				2.28	4.04	-0.867	0.721	-0.237	-1.09	-1.94
1.14	0.819	-1.47	1.5	-0.0862				0.995	3.74	-0.21	0.527	-2.08	-1.72	-2.47
0.899	1.12	-1.92	1.64	-0.73				0.539	3.73	-0.496	0.762	-3.88	0.819	-2.49
0.438	0.679	-0.922	2.6	-0.0282				3.41	4.48	-0.398	0.253	-2.63	-1.54	-2.36
1.12	0.439	-0.56	2.05	-1.05				3.58	3.86	0.63	0.982	-2.06	-1.08	-2.33
0.795	0.345	-0.931	0.684	-1.3				2.6	4.59	0.364	1.24	-2.93	-3.08	-1.81
0.185	0.755	-0.934	0.597	-0.258				0.621	3.57	0.727	1.47	-2.31	-0.393	-1
0.24	0.341	-0.771	0.526	-1.38				-1.11	3.36	0.402	1.39	-1.73	-0.711	-0.926
1.26	0.508	-1.74	0.592	0.225				-0.143	4.04	0.473	0.294	-1.55	-0.862	-0.991
0.619	1.79	-1.53	2.1	0.649				-0.0636	4	0.252	1.01	-3.38	0.885	-1.13
1.35	1.31	-0.58	0.828	0.356				0.768	2.57	0.286	0.858	-2.93	0.361	-1.41
0.883	1.25	0.904	0.228	0.988				1.18	2.86	0.842	0.71	-3.14	0.0929	-0.701
-0.124	0.864	1.3	-1.13	0.377				0.695	3.47	0.743	0.849	-3.03	-0.914	-0.484
-0.256	1.24	1.8	1.79	0.163				-1.41	2.47	0.352	1.16	-2.26	-0.0403	-0.905
0.737	1.74	1.26	1.3	2.09				-1.46	2.67	0.633	0.388	-2.18	0.975	-0.394
0.669	0.801	1.42	0.646	-0.159				-0.0927	3.97	0.728	-0.632	-2.86	0.0343	-1.62
0.731	1.15	1.32	-1.94	0.226				-0.806	2.28	-0.264	-0.771	-3.2	-1.02	-0.305
0.206	1.33	0.737	0.595	-0.383				-1.09	2.27	0.724	0.0715	-2.7	-0.613	-1.85
1.12	0.797	1.02	2.67	-0.565				-0.88	2.12	0.0677	-0.319	-2.14	0.789	-1.64
0.71	0.181	1.41	0.454	0.225				-0.148	3.73	0.651	-0.389	-1.58	-0.525	-0.94
0.696	0.584	1.31	-0.995	0.472				-1.01	4.31	-0.319	0.157	-1.32	-0.145	-0.799
1.4	0.923	0.253	-0.699	-0.467				-1.45	3.22	0.452	0.567	-1.19	0.0866	-0.341
1.45	0.957	0.16	1.47	0.289				-1.86	3.84	0.432	0.947	-2.47	0.267	-0.41
1.96	0.932	0.35	1.16	-0.166				-0.178	2.34	0.189	0.88	-2	-0.54	-0.747
2.06	1.41	1.51	-0.931	0.334				1.03	3.27	0.46	0.984	-2.05	-0.474	-0.89
2.54	0.742	1.77	0.0331	0.223				0.272	2.2	1.17	1.24	-3.03	0.558	-2.49
1.55	1.09	2.33	1.63	1.51				1.02	2.76	1.15	0.628	-2.66	-0.0147	-1.31
1.62	0.405	0.924	-1.87	0.769				-0.945	1.52	0.154	0.61	-1.51	-0.988	-0.126
1.85	0.000934	0.409	3.82	1.74				-0.0388	3.42	0.43	1.32	-2.91	0.903	-0.0023
2.22	-0.705	0.229	1.41	0.83				-0.387	3.31	0.276	0.807	-1.53	-0.283	-1.15
2.96	0.282	-1.22	1.11	0.902				-0.923	4.42	0.759	0.72	-1.4	2.09	-1.16
2.61	-0.101	-0.165	2.75	0.797				0.095	3.53	0.285	0.739	-2.22	0.57	-1.51
2.07	0.13	-1.63	0.685	0.157				0.854	3.93	0.462	1.53	-2.08	0.725	-0.924
2.36	0.921	0.149	2.7	1.3				0.895	4.33	0.013	1.73	-3.23	-0.3	-1.03
2.42	0.479	-1.55	3.15	1.19				0.542	1.64	-0.267	1.55	-2.29	0.153	-0.862
3.29	0.182	-1.27	1.22	0.84				2.14	2.69	0.397	1.74	-3.19	0.822	-1.22
3.41	0.343	-1.02	1.89	1.69				2.29	2.92	0.776	1.94	-2.02	-1.73	-1.64
3.57	0.535	-0.512	0.832	1.25				2.48	3.49	1.39	1.79	-2.8	-0.219	-1.73
3.08	0.49	-0.0545	1.36	1.44				1.61	4.42	1.22	2.32	-1.64	-0.165	-2.62
3.86	0.552	-0.36	1.09	1.21				2.01	3.39	0.0861	1.48	-1.69	3.33	-1.79
3.41	0.294	-1.04	0.467	1.69				3.23	3.52	0.562	1.52	-2.71	3.67	-1.87
3.6	0.919	-0.905	2.27	0.743				3.55	3.72	0.272	0.961	-3.14	3.42	-2.1
3.23	-0.0534	-1.24	0.298	1.28				2.26	3.23	0.19	0.771	-2.97	3.71	-1.48
2.68	0.181	-1.78	0.0189	0.838				4.35	3.98	0.194	0.505	-0.861	3.86	-1.3
3.25	0.409	-0.826	1.12	0.83				1.52	3.31	0.495	1.43	-0.215	1.83	-1.4
3.47	-0.506	-1.53	2.26	1.15				1.28	3.1	0.569	1.62	-1.52	0.342	-2.05
3.25	0.654	-0.254	0.344	0.81				1.29	3.15	-0.0251	1.37	-2.77	2.12	-1.35
2.85	0.0175	-1.32	2.07	1.12				1.75	2.49	0.193	0.621	-2.59	0.08	-1.46
3.69	0.457	-0.159	0.12	1.03				0.473	3.31	0.88	0.231	-2.29	0.833	-1.51
3.08	-0.224	-0.67	1.88	1.93				1.29	2.5	1.06	0.22	-1.05	0.269	-1.36
3.43	0.168	0.575	2.04	1.08				1.88	1.56	0.581	0.992	-2.24	1.8	-1.56
3.17	0.648	-0.551	-0.207	1.6				0.832	3.01	1.37	1.45	-1.46	2.16	-1.69
2.64	1.63	-1	0.385	1.12				-0.346	3.4	1.65	2.44	-2.31	1.67	-1.53
3.44	1.95	-0.341	-0.173	1.88				0.047	4.01	1.66	2.27	-0.665	1.47	-1.51
4.21	1.35	-1.11	0.885	1.19				-0.234	4.08	0.509	2.72	-0.694	1.27	-0.879
3.4	1.08	-0.83	0.083	1.45				1.02	4.58	0.143	1.87	-2.44	0.805	-1.37
3.53	0.274	-0.388	0.193	1.86				1.34	4.07	-0.201	2.61	-1.55	1.47	-1.38
4.08	0.211	0.783	-0.267	1.24				-0.647	3.81	0.0839	1.94	-2.76	-0.0921	-1.51
4.39	0.117	-0.167	1.65	0.38				-0.636	3	0.318	1.73	-2.15	1.75	-1.91
4.2	-0.0796	-1.1	0.064	0.408				0.291	2.54	-0.231	1.74	-1.4	-0.263	-2.01
4	1.11	-0.662	-0.0115	0.95				-0.745	1.76	0.243	0.989	-1.64	-0.502	-2.43
5.57	0.669	0.616	-0.881	0.856				-0.573	3.83	0.775	0.417	-2.23	0.707	-1.82
5.55	-0.501	-0.212	1.26	1.23				-0.223	3.42	0.215	1.06	-1.71	1.68	-0.902
4.61	-2.01	0.248	1.2	0.509				-0.447	3.83	0.706	1.25	-3.15	-0.159	-1.19
4.54	-1.35	0.52	1.39	0.271				-0.404	4.59	1.14	0.176	-0.896	-0.249	-0.649
3.78	-0.355	0.151	0.401	0.06				0.103	3.89	0.884	0.0221	-1.45	0.8	-0.672
3.66	1.57	-0.141	2.29	1.59				-0.899	3.91	1.03	0.252	-1.17	-0.0424	-0.293
2.91	1.75	0.039	1.58	1.18				-0.679	3.1	1.06	0.0967	-1.71	-0.93	-1.49
3.12	2.19	-0.0176	0.906	0.23				-1.83	1.77	1.17	0.341	-1.57	-0.0673	-1.57
3.84	1.08	0.465	1.97	0.612				-0.896	1.56	0.919	0.13	-1.07	0.277	-1.25
2.49	0.784	-0.0537	-0.515	1.12				-0.595	2.76	0.65	0.297	-2.04	0.111	-0.415
2.49	0.554	-0.267	-0.206	0.11				-0.601	1.8	0.444	0.0819	-1.25	0.741	-1.57
1.44	1.7	-0.51	-1.47	0.759				0.634	2.51	0.511	0.953	-1.32	0.688	-0.688
1.85	3.33	0.574	-0.00088	0.812				0.0479	3.86	0.215	1.84	-1.98	1.44	-0.759
2.09	3.37	0.3	1.6	0.903				-0.991	4.47	0.554	1.88	-1.57	1.43	-0.753
2.13	4.63	0.224	0.92	-0.215				-2.23	3.02	0.862	1.14	-2.02	0.423	-0.898
2.44	3.88	-0.107	-0.833	0.25				-1.78	2.95	1.5	1.29	-0.49	1.21	0.709
1.12	3.02	0.461	2.68	0.384				-1.12	3.16	1.26	1.19	-2.18	0.26	1.12
1.15	1.92	0.114	0.116	0.621				-1.12	3.01	0.947	0.973	-3.22	0.463	-0.629
0.793	2.65	0.287	1.48	1.51				0.508	3.04	1.16	0.85	-2.28	1.33	0.0972
1.45	3.38	0.495	0.477	1.68				-0.204	3.36	0.647	1.15	-1.59	-0.284	0.363
0.976	4.21	1.21	1.36	0.856				0.124	1.86	1.01	0.923	-1.12	0.604	-0.267
0.91	2.78	0.0474	1.37	0.94				-1.63	3.34	1.23	0.832	-2.25	0.751	-0.691
0.39	3.33	-0.0653	0.124	0.344				-1.22	3.98	0.941	0.857	-1.55	-0.136	-0.835
0.552	3.49	-0.18	2.03	1.05				-0.912	3.1	0.974	2.01	-1.95	-0.646	-1.42
0.768	2.42	0.0413	0.288	0.598				-1.08	3.84	1.22	2.56	-2.06	0.847	-0.874
0.65	3.12	-1.23	-0.329	0.604				-1.44	3.36	0.863	2.19	-1.28	3.99	-0.904
0.316	3.24	-0.0114	-0.15	0.666				-0.868	2.26	0.9	2.69	-2.14	0.992	-0.951
0.601	3.1	-0.144	0.113	0.577				-0.794	1.98	0.761	2.77	-1.07	-0.0396	-0.061
0.271	3.65	-0.0648	2.53	-0.385				-0.985	2.5	1.44	2.81	-0.897	-1.93	-0.373
0.474	2.75	-0.927	1.99	-0.649				-1.27	3.67	1.55	2.73	-2.34	-0.828	-0.368
0.158	2.66	-0.713	-0.106	0.667				-1.33	2.93	1.7	1.95	-1.59	-0.701	-0.469
-0.464	3.01	-2.26	-0.834	0.527				-0.428	2.21	1.36	1.96	-1.44	-0.291	-0.648
0.514	2.77	-0.177	-0.142	0.884				-0.761	2.45	1.94	1.77	-2.49	-1.05	-0.928
0.501	2.74	-0.528	2.16	1.04				-1.1	3.08	0.579	1.47	-2.11	-0.896	-1.37
0.261	3.62	0.0511	2.19	0.43				-0.286	3.17	1.22	1.82	-1.05	1.25	-0.776
0.25	3.57	-1.04	2.06	1.47				-0.381	3	1.32	1.96	-1.92	2.69	-1.24
0.332	3.22	0.65	0.88	0.775				-0.417	4.27	1.72	1.81	-2.45	0.545	-1.23
0.0416	2.64	-1.36	-0.643	1.04				-1	3.48	1.27	2.45	-1.59	-0.553	-1.92
-0.771	1.58	-0.461	-0.152	0.496				-0.575	4.12	0.632	2.53	-1.07	-0.59	-1.47
-1.15	1.53	-1.34	-0.266	1.19				-1.31	2.07	1.46	2.27	-2.02	0.388	-1.72
-0.785	1.7	-0.443	0.911	-0.0602				-0.255	3.48	1.77	1.67	-2.94	1.78	-1.74
0.0372	1.37	-1.57	0.717	0.955				-0.0364	3.68	1.05	1.7	-2.11	-0.838	-1.87
-0.161	2.26	-0.892	-1.42	0.773				-1.7	3.33	1.24	1.32	-0.353	-0.825	-1.91
0.104	2.1	-0.575	0.968	0.566				-1.42	2.57	1.05	1.18	-2.46	-1.01	-1.65
0.136	1.15	-0.575	-0.656	0.52				-1.73	2.33	1.33	1.32	-1.65	0.273	-0.855
0.0255	0.665	-1.25	0.162	0.514				-1.34	2.06	0.907	1.9	-1.99	-0.219	-1.05
-0.951	2.15	-1.87	2.18	0.601				-1.53	2.23	0.522	1.68	-0.895	-0.000638	-1.22
-0.939	1.06	-1.76	-1.02	0.819				-1.81	4.22	1.36	1.74	-1.67	0.061	-1.94
0.014	0.172	0.133	2.18	0.476				0.443	2.33	1.42	1.75	-3.16	-0.418	-1.31
0.511	0.118	-2.56	0.614	0.0193				0.415	1.8	1.45	2.28	-1.23	-0.967	-1.26
0.552	0.87	-2.47	-0.0322	0.142				0.903	1.41	0.919	1.64	-1.41	-0.0398	-1.33
0.615	0.59	-1.91	0.147	0.645				0.379	2.81	1.11	1.44	-0.333	-0.463	-2.18
0.0707	0.173	-1.5	-0.881	1.46				-0.234	1.17	0.711	1.5	-1.82	-1.65	-1.62
-0.833	-0.21	-1.48	0.23	1.06				0.449	3.63	0.81	2.34	-1.41	-0.962	-1.28
-1.22	-0.166	-1.48	-0.756	-0.292				-1.38	2.38	0.586	2.27	-0.968	0.596	0.134
-1.9	-0.526	-0.809	1.15	0.929				-1.03	1.35	0.421	2.72	-2.5	-0.805	0.106
-0.992	-0.179	-1.77	-0.721	0.859				-0.814	1.18	0.429	2.53	-2.67	-2.34	-0.946
-0.687	-0.793	-0.401	-1.08	-0.00571				0.479	1.55	0.953	2.6	-1.26	-1.21	-0.682
-0.13	-1.08	-0.0712	0.133	0.532				-0.0873	1.38	0.169	2.69	-1.6	-1.37	-0.501
-0.79	-1.14	-0.474	0.0773	1.46				0.154	3.97	0.965	2.93	-2.15	-0.776	-0.0121
-0.23	-0.277	-1.69	-0.927	0.686				-1.11	3	0.787	2.75	-0.835	-1.77	-0.138
-0.327	0.58	-0.804	1.87	0.615				-0.597	3.04	0.503	3.76	-2.17	-0.895	-0.59
-1.07	0.0109	-0.756	1.88	1.05				0.0084	2.73	0.256	3.62	-2.07	-2.36	-1.2
-0.991	-0.676	-0.933	0.324	0.94				0.66	1.18	0.331	2.93	-1.33	-2.33	-1.16
-1.21	-0.255	-1.04	-0.145	0.528				1.73	0.482	0.51	2.37	-2.88	-2.16	-0.781
-0.544	-0.441	-2.07	1.32	0.781				1.15	1.98	-0.227	2.35	-2.05	-1.12	-1.58
-0.191	0.0738	-2.69	0.29	0.372				-0.746	2.52	0.807	1.94	-1.39	-1.48	-1.59
-0.465	-0.124	-1.09	-3.94	0.664				1.07	1.92	1.32	2.38	-1.83	-0.441	-1.58
-0.39	1	-0.892	0.471	0.536				-0.349	1.65	1.28	2.84	-1.4	-1.15	-1.28
-0.936	0.852	-2.49	-0.253	0.526				-0.0835	1.24	1.04	2.14	-2.85	-0.554	-1.36
-1.05	0.471	-0.941	-1.26	0.893				0.898	0.39	1.26	2.57	-2.99	-1.21	-1.2
-0.115	0.353	0.176	0.441	0.176				-0.0459	1.59	1.72	2	-3.54	-0.735	-1.16
0.475	-0.186	-0.0597	-0.639	-0.181				0.832	1.3	0.987	1.98	-2.56	-1.61	-0.496
1.53	0.805	0.0325	-0.773	0.387				1.89	2.91	0.987	2.12	-2.92	-1.91	-1.02
1.02	1.22	-0.807	-0.0126	0.877				3.56	0.855	1.42	1.92	-2.96	-1.86	-1.69
0.339	1.68	-0.539	-1.17	1.11				3.31	0.795	1.45	1.9	-2.77	-0.841	-1.31
0.354	1.9	-0.224	0.416	0.525				2.17	0.341	1.16	1.41	-3.05	-0.835	-0.98
0.284	1.28	0.945	-2.67	-0.118				3.03	1.73	1.29	1.18	-4.23	-0.913	-1.57
0.605	0.85	-0.642	0.865	-0.567				2.9	2.06	0.85	2	-3.11	-0.222	-0.884
0.00447	0.183	-0.396	-0.707	-0.0875				3.94	1.44	1.91	1.09	-3.23	-0.815	-1.6
-0.552	-0.28	-0.642	0.712	-0.391				3.41	2.34	1.64	1.67	-2.6	0.236	-0.776
-0.711	0.573	-0.084	1.31	0.332				2.24	2.02	1.47	1.05	-3.09	0.544	-0.972
-0.487	1.36	-0.685	-0.322	-0.0208				3.44	0.374	1.56	1.25	-2.19	-0.489	-0.561
0.0787	1.15	-0.643	0.798	0.323				3.12	1.5	1.45	1.88	-2.2	-1.46	-0.504
0.0361	1.38	-1.11	-0.54	0.715				2.08	-0.177	1.21	1.67	-2.41	-3.62	0.144
0.375	1.16	-1.27	0.166	0.729				2.11	0.3	1.5	1.28	-2.76	-0.205	0.471
0.544	1.94	-1.34	1.03	0.673				2.2	2.94	1.72	1.04	-3.79	-0.165	-0.277
