# Supplementary material for: Metabolic sensing in AgRP neurons integrates homeostatic state with dopamine signalling in the striatum
Source: eLife journal article supplement (doi:10.7554/elife.72668), 2022-01-12
Supplement: fig2-data1 [file Fig2M.xlsx]

## Sheet: Sheet1
wt									ko
-1.81	-1.14	-1.37	-0.26	-0.834	-1.48	-1.03			-0.882	1.51	0.148	-2.12	-1.22	0.443	-0.452
-2.34	-0.294	0.63	0.815	-0.125	0.666	-0.134			-1.1	2.22	-1.78	-1.78	-1.15	-0.0479	-0.721
-1.62	-0.592	1.58	-0.601	-0.582	0.163	-0.54			-0.859	1.01	-0.896	-0.508	-1.82	0.776	-0.411
-1.43	-0.734	0.253	1.4	-1.34	-0.627	-1.15			-0.495	1.18	-1.53	-0.811	-1.82	0.0365	-0.122
-1.55	-0.887	-0.677	0.393	-0.0341	-1.05	-1.08			-1.13	2.01	-1.16	-0.685	-1.26	0.227	-0.561
-0.154	-2.69	-0.858	0.452	0.367	0.371	-1.53			-0.676	0.9	-3.32	-1.79	-1.11	0.939	-0.344
-0.352	-1.35	0.314	1.8	-0.816	0.933	-2.91			-1.12	1	-1.87	-0.627	-0.974	1.19	-0.603
0.644	-1	-1.18	-0.235	0.251	-0.212	-2.27			-1.38	0.626	-1.11	-0.176	-0.834	-0.586	-1.37
0.731	-0.663	0.0941	0.643	-0.0875	-0.552	-2.21			-1.19	-2.13	-0.345	-0.0706	-0.177	0.715	-0.778
0.44	0.111	0.838	0.703	-1.49	-0.852	-1.18			-1.65	0.613	-0.564	-0.725	0.222	1.75	-0.103
0.101	-0.731	0.848	-0.672	-0.535	-1.7	-0.869			-1.18	0.0814	0.629	-0.287	0.104	0.676	-0.362
-0.442	0.121	0.113	-0.0787	-2.1	0.743	-1.23			-1.03	0.0904	0.337	-1.54	0.262	1.81	-0.276
-0.901	-0.392	0.253	0.166	-1	0.497	0.0166			-1.11	1.03	0.551	-0.534	0.477	0.381	0.348
-0.545	-2.29	-0.59	-0.459	-0.778	0.792	0.333			-1.17	1.41	1.69	-1.12	-0.237	1.57	0.587
-1.18	-0.0583	0.624	0.273	-0.829	0.849	1.72			-0.986	-0.801	1.13	-1.09	0.187	1.34	-0.181
-0.282	-0.217	1.47	0.367	0.118	-0.34	0.259			-1.42	-1.82	0.996	-1.41	-0.138	0.676	-0.00325
-0.415	-0.575	1.7	0.936	0.702	0.316	0.57			-0.836	-0.773	0.00657	-0.427	1.24	-0.641	0.0482
0.652	-0.211	0.754	-0.655	-0.432	-0.689	-1			-1.34	-0.194	0.351	-0.898	0.0355	-0.496	1.04
-0.658	-0.686	-0.445	1.29	-0.82	-1.04	-0.0946			-1.5	0.368	2.26	0.722	-0.0559	0.0867	1.16
-0.631	-0.288	1.33	-1.95	-0.0906	-1.12	-0.289			-1.57	-0.0764	0.282	2.18	-0.49	-0.573	1.16
-1.44	-0.318	-0.422	-1.56	-2.04	0.136	-2.38			-1.13	-0.153	-0.886	2.53	0.238	-0.0314	0.631
-2.54	-1.64	0.00847	-0.167	-1.34	-0.795	-2.09			-1.11	-0.563	0.0517	2.76	0.953	1.14	0.661
-0.348	-0.417	-0.126	0.528	-1.93	0.179	-0.906			-0.388	-1.39	-0.985	2.09	-0.328	0.517	0.435
-0.249	-0.564	-2.28	-0.105	-0.0788	-0.943	-0.856			-0.374	0.939	-0.133	1.46	-0.937	-0.199	1.3
-0.227	0.0408	-0.199	0.379	0.741	-0.463	-1.05			-0.722	1.5	0.196	1.75	-1.26	-0.543	1.94
0.845	-0.0449	0.864	-1.77	1.35	0.158	-1.23			-0.506	0.357	1.85	1.24	-0.172	-0.395	2.73
0.488	-0.93	-0.812	-1.26	-0.228	-0.0596	-1.92			-0.0897	0.174	0.473	1.43	-0.271	-0.245	2.43
-0.416	-0.422	-0.0743	1.73	-1.09	-0.971	-1.07			-0.646	-0.0356	0.86	-1.61	-0.417	-0.186	1.97
0.232	0.618	-0.443	-0.436	-0.229	0.227	0.0445			-0.663	0.335	0.302	-1.08	-0.181	0.228	1.44
-0.296	-0.0403	-1.31	0.217	-2.04	-1.16	-1.71			-0.785	0.324	-0.986	-0.609	-0.115	1.29	1.29
0.891	0.565	-0.47	1.25	-1.81	1.65	-1.47			-0.556	-0.311	-1.22	-0.0628	-1.48	0.113	1.26
0.358	0.995	0.414	-0.226	-0.371	0.141	-1.13			-1.7	-1.1	-0.308	-0.0835	-1.14	1.53	1.57
0.912	-1.65	-0.457	0.637	-0.0549	-0.824	-0.429			-0.942	-2.21	-0.552	1.18	-1.64	0.68	0.917
-0.541	-0.455	-1.2	-0.47	-0.153	-3	0.0596			-0.373	-0.185	-0.593	0.369	-1.28	2.83	1.22
-1.4	-0.605	-0.478	1.49	-1.14	-0.857	-0.939			-0.368	-0.221	-1	-0.454	-1.47	1.73	-0.04
-0.549	-0.224	-1.19	-0.092	-1.06	-0.422	-0.0316			-0.571	0.227	-0.0783	0.732	-2.46	1.26	0.45
0.441	-1.3	-1.16	-1.21	-1.54	0.297	0.49			-0.551	0.739	-0.069	0.0181	-0.721	1.21	1.05
1.96	-1.24	-0.921	0.849	-2.04	0.621	1.14			0.115	1.08	-1.28	-0.0345	-0.429	1.26	1.8
1.45	-0.999	-1.36	-0.58	-0.835	-0.665	0.894			-0.138	-0.966	-0.0381	0.123	-0.0447	-0.919	1.5
0.782	-0.584	0.131	-1.63	0.387	-0.365	0.788			-0.183	0.252	1.26	-0.24	-0.728	0.136	1.56
-0.561	-1.07	-1.96	0.904	0.332	-2.3	0.158			-0.701	0.264	1.71	-0.394	-0.266	0.473	0.967
-0.829	-0.822	0.268	-2.71	0.912	-0.901	-0.166			0.34	-0.0616	0.464	0.133	-0.305	1.09	0.852
-1.15	0.0349	-0.924	-0.167	0.842	1.24	-0.373			-0.153	-1.43	-0.164	-0.974	0.524	0.706	0.0983
-1.28	-0.688	-1.35	0.614	0.58	1.1	0.309			0.168	0.698	0.403	1.07	1.76	1.13	0.747
-0.748	-1.34	0.891	1.18	-0.463	-0.106	0.84			-0.477	0.202	-1.22	0.0867	0.743	1.04	0.864
0.275	-1.72	0.55	0.0116	0.269	0.151	1.26			-0.574	0.205	-1.16	0.405	0.742	1.35	1.87
0.709	-1.01	0.207	-1.8	0.936	0.632	0.709			-0.652	0.199	0.447	0.179	0.482	0.618	1.91
1.29	-1.35	-0.245	-0.663	1.11	2.14	0.747			-0.476	-0.56	-0.649	0.459	0.541	0.799	0.845
0.278	0.066	-1.6	-0.402	0.0136	0.408	0.335			-0.553	-0.795	-0.0467	-0.204	0.18	0.534	-0.76
-0.105	0.132	0.7	-1.76	-0.169	-1.59	0.614			-0.242	1.67	-0.418	-0.58	0.107	1.09	-0.686
-0.821	-0.0685	0.977	-1.95	0.686	-0.937	1.28			-0.316	1.06	-1.77	-1.35	-0.622	0.474	-0.2
-0.89	-0.765	2.16	0.658	1.31	-0.808	0.815			0.0113	-0.833	-0.496	-1.69	-1.74	-0.336	0.655
0.137	-0.26	1.07	-1.15	0.387	-0.58	0.388			0.105	-2.27	-0.0753	-0.736	-1.95	0.145	0.0553
-0.983	-0.807	0.674	0.73	0.0362	-0.942	0.852			-0.472	-1.34	-1.76	-0.591	-1.02	0.629	-0.252
0.00762	0.551	0.875	-0.258	0.169	1.23	0.51			-0.15	-0.606	-0.119	-1.12	-1.07	-1.02	-0.476
0.0455	-0.881	-0.0289	1.1	0.215	0.466	0.234			-0.0779	0.199	-0.481	0.13	-0.093	0.019	-0.755
-0.36	-0.479	-1.63	0.607	-0.352	0.0881	0.566			0.796	-0.627	-1.22	0.18	-0.199	0.266	-0.976
-0.586	-0.68	1.2	-0.907	-0.0991	0.807	0.693			-0.359	-1.49	0.401	-0.362	0.503	0.714	-0.878
-1.19	-1.19	0.441	-2.35	1.45	-0.925	1.09			0.649	-2.26	-0.895	-0.863	1.03	-0.203	-1.81
0.462	-0.562	0.513	-0.415	0.257	-1.7	0.303			-0.173	-0.325	1.11	0.01	0.0959	-1.26	-1.46
1.28	-0.245	-1.32	-0.29	0.843	0.543	0.748			-0.481	-1.69	-0.427	-1.18	0.772	-0.221	-0.776
0.812	-0.732	-1.24	0.446	-1.38	-0.337	0.99			-0.721	0.00776	-0.157	-0.0559	0.264	-1	-0.474
1.15	-0.482	-1.03	0.665	1.27	-1.16	1.46			-0.664	-0.176	1.97	-0.255	0.576	-0.923	-0.742
1.22	-0.276	1.77	0.0781	1.34	-0.0645	1.65			0.345	-1.79	0.429	0.31	0.762	-1.16	0.35
-0.502	-0.162	0.631	0.58	-0.214	0.0247	0.822			0.186	-0.997	-0.075	0.498	1.06	-0.939	-0.453
-0.545	0.743	1.01	1	0.0127	-0.516	0.0839			0.0465	-0.0925	2.12	0.211	0.518	-1.08	-0.608
1.04	1.06	-2.29	0.872	-0.224	-0.795	-0.0118			0.151	-0.035	0.793	0.828	0.289	0.469	-1.01
0.774	1.32	0.994	0.614	0.686	0.359	0.277			0.534	0.633	0.544	1.57	-0.68	-0.0166	-0.913
-0.183	1.53	-0.686	-0.879	-0.314	-0.35	-0.0636			-0.00685	-0.391	1.04	0.573	-0.221	-1.01	-0.978
0.47	0.979	0.188	1.44	-0.603	1.61	-0.124			0.00252	-1.1	1.08	1.41	-0.69	-0.97	-0.241
-1.11	-0.371	0.972	-0.224	1.36	0.246	-0.82			-0.106	0.0283	-0.704	1.49	-0.685	-0.67	0.602
-1.39	0.655	0.584	-0.174	2.19	0.128	-0.351			0.148	-0.448	-0.173	0.824	0.131	-1.13	0.275
-2.41	0.149	0.0646	-0.138	-1.74	-0.502	0.156			0.644	-0.442	-0.0615	0.988	-0.433	-2.15	-0.973
-0.473	0.892	-0.221	-2.05	0.669	-0.0198	0.658			0.24	0.364	0.864	-0.301	-0.0605	-0.311	-1.45
-0.563	1.52	-0.784	0.83	-1.59	-0.644	0.29			0.516	0.468	2.09	0.134	-0.131	-1.05	-1.12
-0.016	0.909	0.271	-0.208	-0.0115	0.686	1.02			0.918	1.3	0.833	-0.123	0.951	-1.23	-0.26
-0.869	1.11	-0.326	-0.678	0.756	-0.264	0.408			0.964	1.07	-0.794	0.593	1.64	-0.473	-0.39
-0.358	1.52	-1.64	-0.436	0.745	-0.679	0.535			1.2	1.63	-0.461	-0.383	1.9	-1.31	-0.339
-0.000297	0.592	-0.648	-0.522	-1.08	-0.467	0.779			0.667	-0.861	-0.897	-0.376	1.39	-0.222	0.68
-1.01	1.4	0.627	-1.02	0.789	-0.574	1.14			0.672	-0.519	0.0587	0.143	1.86	-0.773	0.472
0.215	1.37	2.02	-1.95	1.75	-0.775	2.11			1.15	1.26	0.405	0.247	2.73	-0.601	-0.423
0.699	1.18	0.57	1.21	0.822	0.309	1.71			0.945	0.61	1.1	-0.606	2.14	-2.64	-0.777
0.92	1.22	1.36	0.257	-1.07	2.51	1.91			0.866	0.285	0.695	-0.374	2.32	-1.05	-0.759
1.46	0.673	1.26	0.832	0.0498	-0.233	0.866			1.18	1.01	0.673	-1.08	1.54	-0.44	0.208
0.479	0.647	0.903	-0.808	0.405	-0.658	0.153			1.49	0.61	-0.0302	-0.944	1.79	-1.4	-0.049
0.705	0.271	-0.59	0.534	0.604	1.24	-0.418			1.57	1.06	0.0251	-0.197	1.76	-0.489	-0.427
0.752	1.55	-1.56	-0.0412	0.253	2.77	-0.53			1.19	0.532	-0.529	-0.946	0.105	-1	0.156
1.42	1.26	-1.5	-0.179	-0.272	1.65	0.665			1.6	-0.111	-0.0536	-0.903	-0.244	0.704	-1.58
0.233	1.72	1.32	-1.34	-0.206	-0.244	1.24			1.16	0.303	0.931	-0.259	-0.139	0.398	-1.37
0.144	2.36	1.35	-0.878	0.344	1.13	-0.072			1.83	-0.445	0.362	0.24	-0.786	-0.228	-1.13
0.298	0.697	-0.0218	0.551	2	0.776	-0.401			1.62	0.478	-0.874	0.0212	-0.682	-1.75	-0.538
0.862	0.691	0.151	0.106	0.71	2.45	0.83			1.48	-0.527	1.99	-0.0591	-0.498	-1.29	-0.308
1.24	1.04	-1.15	0.424	-0.15	0.152	0.504			0.966	-2.36	0.00737	-0.351	0.0706	-1.34	-1.16
2.35	1.14	0.759	1	1.8	-0.163	0.139			1.64	-0.474	-2.17	0.19	0.33	-1.47	-0.834
1.91	1.06	1.33	0.445	-0.0595	0.468	-0.0208			1.49	-0.642	0.715	1.62	0.201	-2.52	-1.07
1.44	0.386	0.0856	0.432	1.14	0.147	-0.0493			2.17	2.14	0.66	2.26	0.929	0.049	-1.53
2.13	1.57	-0.153	1.79	0.344	0.501	-0.581			1.73	-0.677	0.694	1.6	0.534	0.454	-0.589
0.464	1.18	-1.02	0.624	0.391	0.376	-1.03			1.95	-0.0927	-0.376	0.0274	1.02	-0.176	-1.14
0.96	1.33	0.171	1.69	2.06	1.8	0.483			2.42	0.223	0.31	1.47	0.675	1.01	-0.88
1.36	1.81	0.671	1.66	1.75	0.845	-0.191			2.09	-0.112	0.366	0.394	0.296	0.601	-0.867
0.337	1.42	0.171	0.563	1.36	1.7	0.263			1.8	1.05	0.31	-0.825	-0.11	-0.542	-1.36
1.26	1.96	-1.16	0.504	-0.473	-0.165	0.333			1.69	-0.659	1.52	-1.39	-0.258	0.52	-1.78
1.38	1.03	-0.458	0.508	0.642	3.47	-1.97			1.74	-0.747	-0.0458	-1.88	-0.253	0.841	-2.08
1.08	0.164	-0.322	-1.2	1.64	1.29	-1.14			1.68	-0.816	-0.462	-1.58	-0.145	-0.695	-1.08
0.859	0.806	0.0715	0.0287	3.09	1.7	-0.882			2.67	-0.717	0.903	-2.03	-0.2	-0.601	-0.533
1.89	1.67	-0.101	0.315	0.348	1.86	-1.4			2.28	-0.0648	1.2	-1.51	0.285	0.0218	-0.385
1.8	1.56	1.19	0.91	0.158	-0.94	-0.821			2.16	-1.28	-0.522	-0.612	-0.218	1.55	-1.19
1.4	0.266	-1.13	0.21	0.34	2.04	-0.844			2.73	1.58	-1.94	-0.665	-0.213	1.28	-0.59
1.01	1.41	1.87	1.81	1.57	1.75	-0.894			2.16	0.632	0.859	-1.43	-0.351	1.78	-0.375
1.19	2.84	0.0265	-1.58	0.618	0.35	-1.03			2.84	0.232	0.0835	-1.17	0.475	1.98	-0.445
1.98	2.02	0.112	0.264	-0.228	1.44	-1.84			2.4	0.861	0.821	-1.25	-0.0132	1.78	-0.81
2.06	1.98	-1.1	0.228	2.26	3.14	-2.71			2.03	-0.267	-0.0268	-1.64	-0.0973	0.378	-0.581
2.09	1.21	-0.0109	-0.252	1.19	2.48	-1.46			2.7	-1.54	-0.778	-0.746	0.247	2.84	-0.825
2.11	1.32	1.99	1.04	1.05	3.6	-1.73			2.55	-1.07	0.241	-0.672	-0.076	2.11	-1.28
1.15	1.93	0.845	1.08	1.35	2.43	-1.03			2.91	-0.707	-0.0868	0.397	0.0497	2.16	-1.68
1.77	1.51	0.661	1.39	0.429	2.78	-0.778			2.9	-0.965	0.263	1.19	-0.367	2.72	-1.29
2.19	1.82	1.49	0.479	0.82	3.02	-0.0435			2.54	0.306	0.194	0.00365	-0.207	1.96	-1.15
3.86	1.58	-0.912	1.13	0.932	4.3	0.404			2.62	-0.424	0.538	1.1	-0.277	2.16	-1.54
3.57	2.19	1.32	2.56	2.16	3.19	0.636			2.87	0.108	-0.48	2.01	-0.344	3.03	-1.17
2.95	1.08	-1.39	0.642	0.75	3.9	-0.377			3.03	-0.711	-1.19	2.84	-0.248	1.9	-0.829
2.53	1.2	1.65	1.75	0.656	3.15	-0.363			2.76	-0.326	0.62	0.568	-0.588	1.95	-0.727
2.65	0.941	2.47	0.739	-0.461	3.64	-0.968			2.83	-0.903	0.353	0.312	-0.444	2.45	-1.03
2.58	1.51	-1.07	1.68	-0.161	0.819	-0.388			2.69	-0.267	-0.402	-0.429	-1.38	3	-0.00306
2.68	1.97	-2.18	3.19	-0.631	-0.887	-0.866			3.21	0.337	0.574	-0.333	-1.6	4.12	-0.384
3.16	2.26	-2.6	1.93	-0.357	0.314	-0.619			2.95	0.678	0.448	-1.44	-2	1.81	-0.38
2.9	2.15	-0.331	1.59	1.95	2.59	0.256			3.05	0.952	-0.211	-0.729	-1.19	3.48	-1.31
3.02	1.39	-0.908	1.31	0.86	2.76	0.0576			3.1	0.696	-1.49	-1.19	-1.55	1.46	-1.49
3.07	1.58	-0.00725	0.425	-1.11	3.79	-0.471			2.69	-0.512	-0.34	-1.7	-1.9	1.55	-1.39
2.76	1.8	1.25	-1.21	-1.93	3.98	0.864			2.87	0.583	0.0356	-1.29	-1.71	2.57	-0.647
3.37	1.65	-1.34	0.708	0.631	3.58	-0.161			3.23	-0.143	-0.417	-0.461	-1.81	1.92	-0.711
3.53	0.907	-2.52	2.23	0.12	3.58	-0.138			3.2	-1.02	1.11	-1.68	-2.31	1.91	-0.606
2.49	0.615	-0.482	2.07	0.0493	3.62	0.91			2.89	-0.573	0.577	-0.33	-1.98	0.723	-0.297
1.58	0.944	-0.195	0.583	-0.0991	2.8	-0.507			2.48	0.704	1.5	0.0728	-1.76	1.33	-0.151
2.68	0.554	1.05	2.07	1.33	3.15	-0.753			3.49	-0.296	0.88	-1.07	-1.1	2.02	1.52
1.99	1.54	0.311	1.59	0.444	2.41	-1.32			3.14	0.427	-0.519	-1.46	-1.81	0.913	1.94
2.12	1.23	-1.14	1.25	0.231	2.88	-1.63			2.99	-0.228	1.18	-2.78	-1.93	0.636	1.8
1.14	0.933	0.533	1.58	0.41	4.84	-1.58			3.21	1.04	2.94	-2.3	-2.38	1.93	1.79
0.992	0.818	1.31	-0.0115	0.59	2.09	-2.04			2.82	-0.000178	-0.295	-1.47	-1.54	1.76	1.73
2.02	1.07	-0.18	1.61	-1.33	2.74	-2.26			2.81	0.7	0.000167	-0.905	-2.37	1.91	1.49
1.9	2.05	-1.28	1.09	-2.91	2.49	-2.59			3.49	0.65	-0.756	-0.645	-1.14	1.9	0.42
2.36	2.23	-0.721	0.045	-2.93	3.08	-2.51			3.55	0.845	-1.09	-1.14	-2.39	0.758	0.653
2.24	0.415	-2.77	0.35	-1.95	1.84	-1.92			3.71	0.911	-1.79	-1.43	-2.08	1.82	0.453
1.98	2.74	0.283	1.12	-2.95	3.52	-1.06			2.5	1.23	-0.619	-2.42	-1.35	1.63	1.13
1.74	2.51	-1.52	0.731	-2.77	3.34	-0.0403			2.32	2.05	-1.1	-2.81	-1.48	2.51	1.55
0.825	1.12	-1.13	3.25	-1.48	3.34	-0.385			2.85	2.48	-0.284	-2.89	-0.62	1.27	1.49
1.91	1.21	-1.64	2.68	-0.791	3.39	0.132			2.78	1.59	0.166	-3.26	0.0427	2.54	1.91
1.28	1.01	-0.951	2.19	-2.65	2.62	0.52			2.94	0.135	-0.129	-3.96	0.666	2.52	2.07
1.25	1.54	-1.32	0.947	-2.44	2.57	-0.133			2.31	0.485	0.121	-3.71	0.493	1.43	2.1
1.98	1.71	1.35	2.94	0.544	4.16	-0.283			2.51	2.25	0.818	-4.28	0.761	2.24	2.02
1.91	1.5	0.0142	3.73	0.802	3.99	-0.983			2.13	1.57	0.195	-3.78	0.301	1.16	1.03
2.16	0.599	-1.12	3.7	0.422	3.27	-1.44			2.46	2.68	0.783	-4.7	1	2.08	1.18
1.28	1.05	-0.0731	3.77	0.774	2.8	-1.84			3.2	1.99	-0.566	-5.44	0.895	1.92	0.999
2.11	1.38	-0.886	2.21	2.17	2.71	-1.56			2.47	1.13	1.18	-6.05	1.79	1.97	0.328
1.86	0.894	0.125	2.74	2.51	2.23	-1.67			2.77	2.2	-0.627	-5.36	1.05	2.79	1.1
2.63	1.12	-0.445	1.78	0.228	4.62	-0.998			2.64	0.914	0.428	-5.26	0.638	1.7	0.906
2.04	0.197	-1.72	1.4	1.03	4.4	-1.63			2.77	1.27	0.711	-5.9	1.12	0.94	1.24
2.58	0.568	0.125	2.33	2.77	2.9	-1.01			3.17	0.735	-0.37	-5.05	0.518	1.98	0.723
3.25	0.861	0.666	3.52	2.29	2.7	-0.464			2.38	2.72	0.556	-3.87	1.21	2.36	0.977
3.34	0.858	-0.391	3.06	3.7	3.63	0.745			2.84	1.86	-1.11	-2.31	0.953	2.07	1.27
4.5	1.2	-0.943	2.67	2.11	5.15	0.442			3.03	1.31	-0.748	-0.875	0.0865	1.16	0.154
4.96	0.612	-0.651	1.09	4.1	4.88	0.275			3.47	1.48	0.183	-1.21	0.222	1.77	0.346
5.21	1.57	1.33	2.87	3.96	4.04	-0.734			2.96	0.53	0.418	-0.424	-0.358	1.59	0.747
6.36	0.952	1.92	5.09	4.05	6.58	-1.01			3.03	0.458	-0.578	0.729	-0.515	1.36	0.904
7.9	0.745	-0.489	4.22	2.25	5.46	0.727			2.71	0.405	-0.293	-0.621	-0.0454	2.79	0.666
6.75	1.49	1.09	5.55	3.34	5.82	0.508			2.38	1.19	0.143	-0.665	-0.405	0.522	0.656
5.68	0.11	-0.502	3.41	4.21	5.41	-0.498			2.45	2.42	-0.0452	-0.0224	-0.129	1.13	-0.039
5.46	0.438	1.62	2.38	4.08	4.13	0.201			2.49	1.94	-0.195	-2.34	0.521	1.53	0.801
7.08	1.15	2.61	2.07	4.17	4.25	0.414			2.8	0.96	0.341	-0.546	1.07	2.09	0.641
7.17	1.4	1.65	3.48	4.01	5.61	0.625			2.12	1.98	-1.96	-0.652	0.775	0.99	0.845
6.34	1.38	0.92	3.12	3.31	4.22	1.67			2.63	2.54	-0.0575	2.04	0.0248	0.0909	-0.21
5.4	1.11	3.93	4.78	3.85	4.65	0.917			3.03	2.45	-0.227	0.703	-0.8	0.827	0.0942
4.64	0.732	5.65	2.99	2.77	2.42	1.25			3.13	2.4	-0.579	1.37	0.296	2.06	0.301
4.69	-0.307	5.57	4.49	3.85	4.04	1.87			2.87	2.43	0.77	2.1	-0.889	0.551	0.141
4.9	1.22	6.23	4.65	3.97	4.4	1			3.37	1.35	-1.35	2.96	-0.719	2.41	-0.604
4.92	0.404	7.64	4.09	3.95	2.26	0.268			3.32	0.454	-1.46	4.22	-0.161	2.6	1.08
4.34	1.63	3.89	2.92	3.41	5.2	1.11			3.19	0.652	-0.792	5.84	-0.541	1.13	0.654
4.87	1.45	4.75	4.17	5.11	4.5	1.97			2.4	0.735	-0.865	5.8	-0.814	0.887	1.62
5.18	1.18	7.39	5.27	3.88	6.86	1.5			2.66	0.00854	-0.487	6.77	-0.205	0.589	0.57
4.26	1.32	3.84	4.2	4.57	4.82	0.554			2.87	1.16	-1.95	6.66	0.305	3	1.06
5.6	1.54	3.97	3.06	4.05	2.41	0.638			2.47	0.76	-1.2	5.8	0.0965	1.69	0.225
5.72	2.05	4.83	4.95	3.58	5.55	0.0445			2.87	0.107	0.111	6.63	-0.227	2.38	1.21
6.23	1.54	8.18	4.09	3.05	3.47	1.09			2.43	0.737	0.598	5.61	0.581	1.65	0.515
5.73	2.13	4.57	3.57	4.87	3.81	1.05			2.29	0.753	0.0348	5.06	0.115	2.3	0.626
5.63	2.41	4.75	4.59	6.62	3.24	1.45			2.04	0.585	-0.925	3.96	0.141	0.572	1.87
5.85	2.2	4.35	4.72	6.63	2.08	1.9			2.49	0.988	0.814	4.33	0.193	1.68	1.73
5.46	2.25	5.36	3.92	8.06	3.99	1.9			2.81	1.5	-0.0615	2.7	2.04	0.638	0.894
4.09	1.52	6.98	3.52	8.7	4.28	1.86			2.64	0.341	0.613	3.3	2.15	1.84	0.915
4.72	1.42	5.09	3.67	6	6.15	1.21			2.77	0.553	0.706	4.79	3.03	1.74	0.152
4.95	1.96	6.11	3.14	6.36	4.2	2.94			2.68	0.757	0.812	4	4.44	0.674	-0.265
5.88	1.33	6.34	3.3	7.78	5.81	3.21			2.29	0.628	1.68	4.27	5.19	2.03	0.108
5.78	0.703	5.92	4.34	6.9	4.36	4.14			2.77	0.0883	0.299	5.1	6.13	2.12	1.02
5.22	1.21	4.73	3.49	7.23	7.22	3.49			2.34	1.57	-0.312	4.75	6.21	2.09	1.78
5.27	2.19	4.51	3.56	6.46	4.29	3.29			2.7	1.84	2.36	4.88	5	0.684	2.55
5.4	1.07	4.19	3.6	8.62	4.7	2.95			2.3	1.37	0.27	3.31	4.35	1.03	3.14
4.61	2.44	5.16	3.2	7.22	5.18	3.09			1.9	2.68	1.78	1.86	4.75	2.68	3.98
5.43	2.17	3.82	2.98	6.37	3.75	2.87			2.39	3.28	-0.00296	1.95	4.93	1.71	4.89
4.68	1.16	4.45	2.41	5.63	4.47	2.31			1.92	2.67	0.23	1.69	5.5	2.56	4.26
4.91	2.69	6.62	3.82	7	3.43	2.99			1.44	3.91	0.0304	1.59	5.37	0.632	4.74
4.84	1.61	4.3	3.48	6.54	3.7	3.53			1.74	3.21	0.319	2.8	6.21	1.46	4.44
4.34	1.37	6.44	2.21	6.3	4.56	3.72			1.71	2.82	-0.691	2.21	6.15	1.86	3.71
5.57	2.75	6.65	2	5.99	4.39	4.18			2.12	1.64	-0.32	0.422	6.29	0.493	3.47
5.01	1.3	7.62	2.62	6.27	3	3.98			1.62	1.91	0.941	3.1	6.4	-0.423	3.29
5.22	2.01	5.94	3.17	5.71	6.13	3.58			1.3	1.99	2.35	3.66	5.55	-0.189	3.6
3.83	2.48	5.22	2.92	8.06	3.72	3.61			1.63	3.17	1.6	5.17	5.55	-0.252	3.21
3.91	2.23	5.44	2.7	6.3	4	4.77			1.52	2.65	2.91	3.54	4.86	1.1	3.66
3.05	2.48	5.89	3.04	6.3	3.33	6.04			1.08	2.45	1.4	5.4	4.3	2.26	3.45
3.01	1.95	5.59	4.09	8.91	5.51	5.66			1.84	1.57	-0.279	3.72	4.3	1.75	2.91
4.86	2.41	5.77	2.4	7.65	6.13	5.02			1.24	2.41	1.06	4.45	4.76	1.53	3.75
4.99	1.94	6.69	3.5	6.39	6.65	4.44			1.81	2.47	1.79	3.56	5.56	1.16	3.5
4.96	1.76	4.63	4.07	6.23	5.73	3.97			1.47	1.43	2.17	3.56	5.43	1.51	2.75
5.23	1.68	7.42	3.29	6.59	6.27	3.75			1.8	2.84	1.95	3.82	5.16	0.43	3.06
4.78	3.21	4.58	3.81	6.65	6.44	3.5			1.66	1.04	1.37	3.45	5.88	2.59	2.35
3.75	3.04	6.86	3.94	8.29	6.05	2.32			2.65	3.75	-0.489	3.96	6.22	1.41	2.97
3.44	2.48	7.03	2.96	7.31	5.79	2.57			1.66	4.4	-0.228	4.19	5.66	1.28	3.5
3.91	1.95	6.7	3.38	7.47	6.9	3.93			2.25	2.83	-0.799	5.79	5.07	1.48	3.11
4.05	2	6.2	3.57	8.34	7.38	3.04			1.41	2.25	-0.181	5.14	4.02	1.97	4.04
4.04	2.17	5.56	3.68	5.87	5.12	4.07			1.45	1.01	2.38	5.73	3.77	2.16	3.68
2.84	1.96	6.67	2.64	8.02	7.57	5.99			1.84	2.93	-0.0162	4.85	2.99	2.46	3.82
3.45	2.64	7.06	5.03	6.89	7.01	6.3			2.01	3.1	1.74	4.23	3.31	1.09	3.7
3.3	1.95	5.76	2.61	7.78	7.59	5.42			1.41	2.07	0.948	3.02	2.89	2.06	3.99
3.87	2.62	5.76	3.05	10.2	4.79	5.66			1.47	1.07	2.11	4.11	2.5	1.06	4.33
5.18	1.36	7.14	3.12	7.49	6.97	6.07			1.63	2.37	0.912	3.59	3.18	1.76	4.18
4.16	2.09	5.46	2.65	8.78	5.09	5.28			2	1.34	2.1	3.2	4.29	1.7	3.04
4.47	1.98	6.08	2.87	7.46	6.09	4.24			1.85	0.878	1.47	3.22	3.85	2.21	3.43
3.6	1.9	5.24	3.38	8.72	6.01	3.26			1.07	0.503	0.781	3.45	3.4	1.75	2.67
3.73	1.75	6.64	3.43	6.78	7.59	3.79			2.23	-0.699	2.08	2.48	4.34	1.07	2.56
4.12	1.79	7.17	1.84	7.62	7.24	3.12			1.62	1.07	3.27	3.89	3.8	1.97	3.3
2.96	2.56	6.71	3.73	7.5	6.82	2.94			1.54	2.21	0.041	1.94	3.05	1.85	3.6
3.53	2.56	6.65	4.01	7.91	8.21	2.81			1.48	0.682	1.43	1.24	3.54	2.11	3.61
3.54	2.56	6.01	2.47	7.95	5.8	2.61			2.18	0.563	1.59	1.93	3.63	0.843	3.75
4.09	2.04	9.35	3.89	7.61	6.26	2.7			1.44	0.161	1.19	1.05	3.99	0.912	3.64
4.17	3.07	8.14	3.02	5.19	6.98	2.82			1.61	0.979	-1.17	2.03	4.6	1.31	3.57
5	3	6.81	3.89	7.33	4.46	3.28			1.57	0.28	-0.0184	2.26	4.26	0.433	3.84
3.83	2.63	7.61	3.95	7.05	6.37	2.62			1.62	2.36	1.35	2.57	4.07	1.54	4.51
3.48	2.09	7.35	3.67	7.91	5.16	2.03			2.14	2.34	2.76	2.92	3.73	1.45	4
4.54	1.66	6.92	4.02	7.98	7.86	1.68			1.69	1.51	1.51	1.98	3.01	1.67	2.92
4.11	2.31	7.44	3.55	9.42	6.95	1.76			1.35	1.6	1.4	2.15	3.62	2.02	2.81
3.76	1.72	6.86	3.63	8.19	6.4	2.45			1.74	2.38	2.03	3.28	3.25	3.79	3.68
3.67	3.46	6.45	3.31	7.29	3.65	2.95			1.93	2.5	1.04	3.32	2.97	1.57	3.34
3.42	2.6	6.76	2.16	8.91	8.1	2.74			1.88	3.09	2.57	3.35	3.24	2.11	3.18
4.72	2.46	5.26	3.52	8.72	5.69	1.97			1.82	2.67	-0.46	2.16	2.49	2.05	3.67
3.91	2.47	6.25	2.87	6.14	5.87	1.72			1.67	2.54	1.37	2.74	1.96	2.89	3.32
4.09	3.28	5.8	4.81	8.7	6.09	2.13			1.4	2.66	1.36	3.05	2.45	1.92	3.68
2.82	1.69	2.88	4.74	7.23	5.65	2.12			1.57	1.58	1.9	2.24	2.53	2.72	3.35
3.81	1.66	5.34	2.96	8.45	7.18	0.736			1.56	1.82	0.743	2.46	3.33	3.56	2.7
3.76	2.03	5.27	4.54	6.84	7.54	0.853			2.01	1.87	0.804	1.96	2.96	1.49	3.04
3.8	2.48	6.98	2.28	9.27	4.72	0.436			1.48	2.74	0.269	2.37	2.86	2.08	3.02
3.81	2.48	5.98	3.56	8.17	5.02	0.913			1.92	1.31	1.16	1.59	3.15	1.39	3.15
3.91	1.84	4.83	3.95	6.19	4.84	1.1			2.01	3.02	0.449	1.7	2.89	1.77	2.96
4.03	2.39	7.24	4.44	8.54	6.85	0.454			2.17	2.73	1.93	2.53	2.78	1.19	3.39
4.37	2.45	7.18	3.84	7.69	4.08	1.12			2.01	0.616	1.54	2.22	1.85	1.12	3.54
4.45	2.72	6.71	5.01	7.44	6.93	0.922			1.86	2.21	1.32	2.22	2.75	2.54	3.29
3.69	3.17	5.6	5.26	7.28	7.4	0.912			1.57	1.15	1.64	2.33	3.24	3.5	2.79
3.1	2.87	7.04	5.78	7.43	5.42	1.43			1.6	3.4	2.09	2.46	2.5	2.12	3.25
3.57	2.27	7.71	2.43	7.16	6.37	1.93			2.01	2.27	3.01	1.34	3.35	1.92	3.44
3.36	1.65	7.61	4.27	6.78	6.39	1.23			1.82	2.9	3.47	1.75	2.89	2.7	3.59
2.61	2.07	5.33	3.05	7.19	6.62	1.33			1.47	1.18	4.18	2.31	2.96	0.678	3.39
2.93	1.26	8.33	4.61	9.1	6.49	1.17			1.75	1.69	4.06	2.14	3.65	1.88	3.58
3.85	2.02	6.04	4.97	6.81	3.7	2.72			2.12	3.24	3.27	1.25	2.81	2.02	3.4
3.72	2.39	5.8	2.86	8.3	6.9	2.56			1.95	1.85	1.66	2.62	2.93	2.31	3.42
3.3	2.03	5.97	2.4	8.11	5.4	3.31			1.27	2.24	3.93	2.35	3.23	2.04	3.43
3.91	0.901	5.71	2.61	6.61	6.61	2.3			1.71	0.917	3.11	2.81	3.57	3.13	3.75
5.29	1.86	5.66	2.58	7.78	6.17	2.2			1.54	2.72	1.98	2.89	3.97	1.79	3.6
4.37	1.82	6.52	3.83	8.62	5.8	2.58			1.84	1.77	3.01	1.61	3.23	3.21	3.32
5.04	2.01	7.85	4.11	8.04	6.63	2.47			2.02	1.68	4.45	2.07	3.68	2.1	3.9
3.53	1.39	5.31	4.08	6.4	7.81	3.73			1.51	1.74	2.41	2.56	3.98	1.74	3.57
4.3	2.82	7.76	4.64	7	5.54	2.76			2.14	2.72	2.84	1.99	3.7	1.77	3.01
4.1	1.64	6.36	4.51	7.86	8.11	2.7			1.72	1.18	2.59	2.69	3.35	2.54	3.13
3.88	1.43	4.76	4.89	8.34	7.78	3.21			1.68	2.61	2.38	1.09	3.57	2.66	4.22
4.43	1.77	5.64	4.35	8.72	5.42	2.09			1.83	3.7	2.41	1.39	3.56	1.92	3.73
4.52	2.41	6.28	3.75	7.29	7.11	2.51			1.9	2.62	1.4	1.26	2.99	3.13	3.98
3.97	2.31	6.43	3.28	8.9	6.06	2.93			1.7	-0.143	1.67	1.92	3.44	3.38	3.21
4.06	1.12	8.05	5.22	7.82	5.61	3.03			1.78	2.04	0.632	1.38	3.02	2.88	3.62
3.92	1.77	7.53	2.85	7.95	7.33	3.4			0.803	1.91	2.02	1.07	3.56	3.16	3.18
4.44	1.37	7.32	3.4	7.96	7.5	3.34			2.2	2.24	2.37	0.623	3.34	4.24	3.52
4.93	0.351	8.72	3.12	6.85	7.28	3.74			1.35	3.21	2.47	0.0907	3.32	3.96	3.28
5.21	0.649	9.27	5.08	7.92	4.91	3.48			1.92	1.94	3.36	1.15	3.98	4.15	3.36
4.47	1.54	6.59	4.7	9.36	5.64	2.36			2.17	3.94	4.09	1.69	3.08	2.97	3.05
4.26	3.15	7.38	3.81	9.02	7.14	2.58			1.47	2.89	3.24	0.927	2.16	3.57	3.15
3.49	2.18	7.38	3.19	8.22	8.2	2.4			1.89	1.81	3.44	1.35	2.52	3.29	3.55
4.47	0.981	9.29	4.29	8.36	7.33	3.27			1.64	1.94	2.55	1.91	2.19	3.26	2.68
4.4	1.48	6.3	3.77	8.26	6.6	2.2			2.29	1.64	2.68	1.6	3.18	3.58	3.47
3.02	1.99	8.33	3.58	7.2	6.73	2.04			1.84	2.91	2.63	2.7	3.3	3.93	2.95
3.73	1.24	8.96	4.42	7.82	6.44	2.98			1.09	0.364	3.6	2.85	3.21	2.8	3.53
2.95	1.46	7.86	3.28	7.25	6.4	2.44			1.89	1.9	2.45	2.9	4.13	3.17	3.25
2.69	0.527	6.97	4.15	8.86	6.76	2.94			1.92	1.08	2.87	3.62	3.77	3.77	3.63
2.88	1.08	7.27	3.52	7.79	6.64	3.72			2.29	2.38	3.78	4	4.56	3.15	2.8
3.81	1.57	7.56	3.81	8.57	5.34	3.63			1.99	2.85	3.23	4.32	4.5	3.18	3.07
4.36	0.639	6.36	4.34	7.3	6.34	2.45			2.32	2.54	3.14	4.34	6.06	3.81	3.67
5.02	0.043	8.05	3.19	8.46	6.9	2.42			1.81	1.79	2.18	4.22	4.89	3.32	4.39
3.8	0.188	9.61	3.04	7.56	5.4	2.27			2.01	2.41	3.08	4.93	5.41	2.42	3.79
4.39	2.22	9.41	2.36	9	7.2	2.27			1.79	1.79	4.56	4.36	5.89	2.29	4.48
3.82	1.23	9.06	2.85	8.67	6.52	2.48			2.09	1.87	2.7	3.03	5.29	3.36	4.63
4.48	1.8	7.9	3.94	9.28	4.53	2.26			1.61	2.38	2.85	3.71	4.99	4.26	5.01
3.72	1.04	8.11	1.45	9.72	5.04	2.67			1.73	3.1	3.99	3.31	5.34	2.9	4.23
3.87	-0.173	7.5	4.94	6.72	4.92	3.12			1.91	2.49	2.39	2.23	4.54	3.3	4.34
3.15	0.339	8.08	6.15	7.61	5.8	1.87			2.45	1.2	2.35	3.14	4.98	4.63	4.31
3.81	0.72	8.39	3.89	7.18	7.88	3.37			2.24	0.837	3.98	2.82	4.42	4.31	3.89
2.83	0.125	8.89	4.08	8.76	6.49	3.11			1.9	1.98	4.24	3.36	3.83	3.09	4.61
2.05	1.39	5.55	4.16	8.86	6.66	3.07			1.57	2.39	5.11	2.95	4.49	3.92	4.43
2.69	1.28	8.35	3.88	8.82	6.33	3.31			2.17	2.21	4.03	2.68	4.04	2.95	4.16
3.04	0.711	7.19	5.52	8.39	6.43	2.99			2.28	2.43	2.96	2.86	4.06	1.5	3.87
3.32	1.31	7.27	3.6	9.25	6.46	2.73			1.67	2.11	3.53	2.94	3.52	3.01	3.6
2.79	0.506	6.25	4.22	8.26	7.53	2.4			1.58	3.81	4.06	4.05	3.67	4.24	4.06
3.28	-0.267	6.76	5.27	8.67	8.13	3.31			1.48	2.16	3.95	2.47	3.68	3.61	3.23
2.91	0.629	7.63	3.08	9.14	9.96	3.13			2.89	3.18	2.78	3.18	3.88	3.16	3.53
2.89	-0.21	8.09	5.42	8.28	6.17	3.86			2.37	2.19	3.89	3.15	3.96	2	4.51
2.62	0.725	8.59	3.6	8.99	6.53	3.89			2.82	1.94	3.75	2.34	3.89	3.1	4.34
2.66	0.471	8.45	3.68	7	6.55	4.99			2.69	2.87	2.77	2.22	3.58	3.87	4.25
3.4	0.316	8.53	4.25	7.55	8.42	4.92			2.11	1.6	2.74	3.09	3.38	3.24	4.23
2.95	0.86	7.37	4.42	7.98	5.81	3.31			1.85	2.22	2.86	2.74	3.99	3.02	4.71
3.34	0.207	7.62	5.79	7.53	7.7	3.23			2.39	1.44	2.44	3.47	3.05	3.35	4.36
3.36	0.399	8.88	4.32	8.69	6.34	4.41			2.23	2.35	3.47	4.31	2.14	4.06	4.4
2.87	1.08	8.49	3.58	8.07	6.4	4.12			1.93	3.11	3.25	4.62	2.91	4.26	4.38
3.33	0.603	7.68	0.473	8.3	7.13	4.5			1.94	2.03	1.87	6.06	2.82	3.92	3.93
2.65	-0.618	9.64	4.5	9	6.36	4.08			2.15	2.94	4.3	6.18	2.34	3.3	3.77
3.28	1.31	6.24	4.36	10.5	6.6	2.9			2.14	2.03	4.2	6.42	2.92	3.59	4.31
3.08	-0.555	9.44	3.81	8.76	7.58	3.55			1.84	1.67	3.87	6.01	2.61	4.58	4.2
3	0.498	7.41	5.79	8.26	6.41	3.16			2.84	1.85	4.05	5.73	2.1	3.35	4.7
3.44	-0.517	7.54	3.14	9.41	7.52	3.17			2.3	3.86	3.76	5.77	2.87	2.91	4.19
2.39	1.44	7.22	5.4	7.68	6.75	3.9			2.31	3.28	3.24	4.49	2.39	3.67	4.68
3.13	1.06	8.93	3.79	8.73	5.77	4.29			2.07	2.28	3.95	4.02	2.63	3.51	4.3
3.38	1.59	9.49	4.97	7.98	8.79	4.36			1.79	2.19	3.16	2.89	3.39	3.72	4.09
3.9	1.09	8.76	5.32	8.4	6.01	4.92			1.9	2.21	4.93	2.31	2.75	1.96	4.31
2.98	0.892	8.87	3.29	8.43	5.92	4.87			2	1.96	3.14	3.17	2.93	2.72	4.52
2.76	1.55	9.33	3.42	7.49	7.52	5.19			2.15	3.35	1.61	3.23	2.75	3.9	5.18
2.35	0.948	8.15	3.37	9.92	7.31	3.78			2.12	1.69	3.81	3.48	3.28	3.95	4.99
3.4	-0.0675	9.82	3.6	7.25	5.87	4.09			2.35	1.76	3.4	2.73	3.38	3.59	4.83
3.06	0.757	8.02	3.81	7.56	7.26	4.37			2	2.08	4.89	3.23	2.77	3.04	5.14
3.12	0.482	7.63	4.93	7.85	7.78	4.05			1.98	2.58	4.01	3.3	3.89	4.13	4.49
3.18	0.767	6.3	3.56	8.98	6.53	4.56			1.56	2.24	4.7	4.27	4.01	4.51	3.92
2.71	1.34	9.92	5.75	8.63	6.92	3.56			2.57	1.81	4.67	3.09	4.62	3.86	4.84
1.59	0.314	8.89	6.06	7.39	6.86	2.81			1.82	2.17	3.81	4.2	4.93	2.78	4.75
3.02	0.773	9.33	4.07	9.14	7.2	3.3			2.51	2.1	4.78	4.82	4.83	2.14	4.38
2.52	0.178	6.85	4.87	9.24	5.16	4.89			2.36	2.63	2.92	5.31	4.24	3.79	4.43
2.62	0.244	7.58	4.31	8.76	8.33	4.77			2.06	2.65	4.05	5.94	4.87	2.75	4.27
2.71	0.716	9.02	5.71	8.21	7.94	4.4			1.53	1.18	3.13	4.88	4.75	3.03	4.65
3.99	0.591	9.13	6.66	7.55	7.82	5.25			2.34	2	3.63	5	4.47	4.22	4.51
3.15	1.11	11.3	5.31	8.59	6.33	4.91			1.96	2.32	5	5.33	3.96	3.36	4.5
3.04	1.34	10.4	4.88	10.2	6.85	6.11			2.53	1.09	4.77	4.96	3.68	3.91	4.31
2.33	0.635	9.2	2.8	7.17	9.08	5.9			2.4	2.17	4.59	4.74	3.91	3.55	4.19
2.78	1.96	10	3.86	8.44	7.37	5.99			1.59	2.83	4.53	4.81	3.87	4.04	4.32
3.46	0.386	10.2	3.92	7.88	8.36	6.28			1.55	2.04	4.47	3.86	3.33	3.65	3.94
3.51	0.332	7.28	5.66	8.11	7.41	6.37			2.33	2.06	5.16	4.69	3.8	3.58	4.05
2.72	0.292	8.68	3.92	8.3	8.15	3.76			1.98	1.57	4.43	5.09	3.53	2.7	4.26
3.13	0.529	8.14	6.28	7.76	7.57	3.51			1.94	-0.279	3.63	5.79	3.71	3.51	4.14
2.72	0.635	9.72	2.48	8.15	8.48	3.56			1.68	2.39	3.26	6.26	3.45	3.16	3.78
2.86	1.27	10.7	4.96	7.72	8.58	4.02			2.38	1.81	3.63	5.92	4.79	3.61	4.04
3.31	0.975	11.1	4.78	7.3	8.81	2.92			1.82	2.57	2.38	5.76	5.17	4.09	3.79
4.01	0.229	10.3	3.75	8.15	8.19	3.9			1.85	0.325	2.73	5.55	4.79	3.46	3.62
3.9	-0.648	9.24	5.29	7.77	8.02	3.05			2.13	2.24	3.59	5.05	4.57	3.84	4.15
3.85	-0.961	8.97	3.93	8.68	8.03	4			2.12	2.11	4.07	5.7	3.38	2.74	3.88
5.07	0.426	9.26	4.99	6.92	7.84	4.09			1.82	1.32	3.99	4.53	3.36	4.03	4
4.89	0.195	9.72	4.38	6.45	7.94	3.52			2	2.27	3.75	3.9	2.66	3.64	3.48
3.87	0.589	7.65	4.26	7.12	8.24	5.38			2.17	2.1	4.79	2.13	2.25	2.65	3.94
4.1	-0.864	7.23	3.9	7.11	8.51	4.66			1.69	1.47	3.69	0.716	2.08	3.38	4.04
3.18	0.209	7.54	3.07	8.93	9.3	4.98			2.65	2.4	4.09	2.92	1.8	2.95	3.05
2.99	-0.0767	8.66	4.46	8.38	8.63	5.7			2.24	2.77	3.26	3.39	0.995	3.89	3.41
2.61	-0.413	6.56	6	8.28	8.03	5.02			2.11	2.51	4.72	3.03	0.348	5.3	2.98
3.14	-0.816	8.61	4.73	7.9	8	6.44			1.85	1.19	4.43	4.28	2.67	4.66	3.63
2.43	-0.116	9.75	4.9	7.01	6.9	6.49			1.62	2.2	5.31	4.78	1.8	4.22	3.63
2.38	-0.421	9.8	5.6	6.07	7.56	6.04			1.37	2.96	4.71	4.83	2.28	4.41	2.33
2.58	1.35	11.8	2.8	7.19	9.27	4.72			2.12	2.27	2.89	3.64	2.08	4.49	3.61
3.02	1.91	9.38	4.71	5.23	7.56	5.68			1.76	2.48	5.25	1.78	1.53	4.38	3.84
2.4	0.216	9.65	4.97	10.6	7.59	4.97			1.66	1.71	4.83	0.106	2.09	4.78	3.52
2.52	-0.864	9.64	5.76	9.42	9.91	5.29			2.18	1.65	3.63	1.62	2.45	3.47	3.28
2.14	0.217	10.6	5.04	9.47	8.99	4.57			2.48	0.525	4.5	2.18	2.4	3.29	3.91
2.28	1.17	9.1	5.89	8.88	8.93	4.52			1.96	1.93	3	1.42	1.9	4.01	4.04
2.9	-0.159	10.3	3.57	6.77	6.71	5.22			1.82	3.99	3.89	3.01	0.486	4.21	3.33
3.21	0.0553	9.18	4.27	7.68	6.1	4.76			1.53	3.04	4.49	1.65	0.72	4.84	3.42
3.55	0.301	10.5	4.67	8.99	7.5	4.14			1.94	1.63	1.35	3.13	0.862	4.06	3.47
3.09	0.529	8.5	4.77	7.56	7.61	3.38			2.23	3.06	3.2	3.51	1.34	3.29	4.15
4.18	0.99	9.13	5.1	11.6	8.58	3.85			2.34	2.36	3.32	4.47	1.52	4.68	4.14
3.45	0.257	10.1	4.23	10.4	8.97	4.11			2.4	3.12	3.27	5.28	1.78	5.05	3.2
3.26	2.09	9.42	4.31	7.75	6.7	3.52			1.64	2.02	3.33	3.88	0.755	4.76	3.44
3.31	1.37	9.4	4.32	7.51	6.41	4.11			1.55	2.75	3.15	5.47	1.36	5.98	3.42
3.06	1.16	9.27	5.33	7.63	7.74	4.49			1.97	3.32	3.4	5.36	0.726	4.99	3.17
2.21	1.74	9.68	5.96	8.08	6.98	4.48			1.99	1.6	2.91	4.58	0.775	5.65	2.78
3.59	1.48	11.9	7.1	9.49	8.63	5.06			1.56	1.21	4.01	4.49	0.385	4.35	4.32
4.08	1.84	11.2	5.18	11.4	6.58	5.46			1.96	2.36	3.45	4.4	0.968	5.19	3.64
3.86	1.44	11.6	6.64	9	7.74	5.33			2.54	2.67	3.57	3.77	1.01	4.48	2.98
3.17	0.293	11.2	5.32	10.3	7.98	6.1			1.75	3.65	3.28	3.93	1.21	5.37	4.05
3.53	0.539	11.8	4.44	8.84	7.68	6.39			1.69	2.47	4.59	3.75	1.51	4.86	3.87
3.78	0.647	10.1	5.14	8.78	8.72	5.76			1.9	2.96	3.7	6.8	2.06	5.31	4.06
3.15	-0.202	12.9	6.91	9.48	7.97	5.97			2.57	3.1	3.27	3.3	2.03	5.32	3.03
3.68	0.664	11.7	5.53	9.22	6.67	4.73			1.47	3.05	2.55	2.09	2.61	4.13	3.24
4.07	0.419	9.94	5.42	7.46	6.46	4.18			1.53	0.894	4.44	2.01	1.65	3.41	2.46
4.11	1.87	12.5	6.18	8.19	7.67	3.55			1.63	1.24	4.21	1.81	1.01	3.91	2.53
3.46	1.27	10.8	5	8.77	6.75	3.55			2.06	3	2.45	1.34	1.03	4.2	2.77
4.12	1.59	8.11	5.11	8.51	6.63	3.59			1.66	2.2	2.63	0.398	1.38	4.55	2.83
3.98	1.04	10.7	5.37	8.22	4.05	2.81			2.35	1.62	4.34	2.32	2.02	5.98	2.96
2.9	1.17	11.1	5.71	9.11	5.17	2.59			2.54	1.36	3.73	3.02	2.07	4.53	2.74
3.2	1.33	10.5	6.42	8.9	6.25	3.3			2.13	1.86	2.55	4.6	1.87	5.31	3.1
3.2	0.979	10.2	6.36	8.9	6.68	4.39			2.16	2.77	4.22	4.14	2.34	4.55	2.28
3.66	0.402	11.8	4.75	7.29	5.42	4.81			2.27	2.31	4.01	3.18	1.9	5.26	2.36
3.08	1.04	10.4	5.96	7.65	5.78	4.88			2.38	1.27	3.51	4.63	1.55	4.88	1.97
3.41	1.26	10.3	6	7.83	6.16	4.4			2.6	2.51	3.64	4.88	1.87	3.89	1.74
3.09	0.848	11	3.92	7.51	4.7	5.3			2.2	2.7	2.61	5.69	1.72	4.59	1.54
3.75	0.218	10.5	5.24	8.25	5.49	4.86			2.34	1.86	3.39	4.81	1.76	4.12	1.5
3.65	0.88	10.1	4.85	7.6	6.94	4.46			1.63	2.37	2.78	6.31	0.656	5.21	2.3
3.66	0.132	10.7	6.73	8.38	5.67	5.62			1.92	2.12	4.5	5.94	0.00638	4.05	1.91
2.68	-0.572	9.79	6.88	7.98	6.84	5.18			1.87	2.67	4.31	4.85	1.5	6.37	1.73
2.7	1.3	9.52	6.71	7.13	4.26	5.02			1.85	2.59	2.89	4	1.86	5.92	1.63
3.24	1.59	11.3	4.68	6.53	5.64	5.64			2	2.67	3.04	5.25	1.26	5.79	1.62
3.06	0.155	11.9	4.67	6.44	6.39	5.43			1.89	2.7	3.61	4.54	1.59	4	2.14
3.25	0.61	9.65	5.8	7.28	6.04	4.85			2.12	2.18	3.87	2.29	0.401	2.85	2.43
2.27	0.559	10.9	5.66	8.32	4.68	4.74			2.58	2.13	2.75	2.36	0.704	3.58	2.58
2.54	0.379	12.7	5.7	6.45	4.91	4.07			2.07	2.15	2.25	0.697	-0.197	4.29	2.97
2.58	0.177	11.9	4.84	9.3	3.49	4.74			1.64	3.12	3.66	1.62	-0.181	3.82	2.58
3.12	-0.0937	11.5	4.78	6.41	6.32	4.85			2.14	3.15	3.39	3.69	-0.818	3.67	2.7
3.16	0.815	11.3	4.56	6.62	6.57	5.61			2.19	2.63	3.28	4.49	-0.252	3.66	2.9
3.91	0.325	11.8	4.16	5.36	4.18	4.65			1.77	1.85	2.82	4.28	-0.366	3.55	2.52
3.26	1.46	11.5	5.42	6.57	4.36	5.3			2.25	3.23	4.19	4.07	0.373	3.71	2.82
3.02	2.16	10.2	4.75	6.36	3.73	4.37			2.35	0.964	2.6	5.77	-0.0812	3.71	1.63
2.96	1.79	10.9	5.43	5.81	6.81	6.1			1.9	1.92	2.66	4.4	0.446	2.94	1.9
3.8	0.27	11	5.37	4.4	5.83	5.51			2.55	1.9	4.55	4.63	0.481	4.78	2.06
2.06	0.147	9.82	5.15	5.24	5.65	6			2.24	2.01	5.67	5.41	0.146	3.82	1.93
3.05	-0.727	10.4	4.65	5.61	6.26	5.7			1.94	3.78	2.52	6.3	-0.688	2.72	1.53
2.69	0.761	10.3	4.54	3.23	5.3	5.13			1.97	2.3	2.73	5.34	0.0836	5.88	2.41
3.11	1.17	10.6	5.05	5.22	5.48	5.18			2.71	2.41	3.48	5.05	-0.409	4.26	1.76
2.93	0.902	12.5	4.86	3.66	5.26	5.13			1.98	3.04	3.56	3.93	0.239	3.83	2.31
2.32	0.111	12.1	4.61	2.51	6.16	4.93			1.88	1.16	3.5	4.33	0.62	4.34	1.92
2.57	1.34	10.7	4	4.03	4.16	5.04			2.58	1.67	4.26	5.74	0.414	3.8	1.69
2.93	0.139	11	3.72	5.1	5.34	4.18			2.94	1.2	3.11	3.47	-0.109	2.62	1.97
2.36	0.0935	11	4.64	5.03	6.21	5.01			1.89	3.02	4.16	2.2	-0.528	3.67	2.13
3.03	-0.193	11.6	4.23	6.27	6.07	5.43			2.96	0.669	4.01	2.34	-1.13	2.35	2.08
2.11	0.713	12.2	4.13	5.81	5.52	6			2.65	2.21	3.49	2.88	-1.04	3.64	1.99
2.86	1.02	10.6	4.14	3.54	5.44	5.5			2.18	1.4	2.31	3.54	-0.871	3.27	1.68
2.75	1.37	11.3	3.38	4.57	5.43	4.82			2.38	1.56	2.24	2.24	-0.269	3.34	1.75
2.11	0.203	10.8	4.45	4.26	5.97	5.87			2.34	1.41	1.75	1.17	-0.753	2.93	1.95
2.77	0.438	12	3.65	3.16	5.44	6.4			2.05	1.67	2.39	0.553	-0.296	2.52	1.28
2.46	1.16	12	4.64	5.82	3.79	5.38			2.52	3.7	4.53	1.33	-0.683	3.26	1.68
3.1	1.81	11.1	4.48	4.24	5.26	5.77			2.74	0.682	3.55	1.32	-0.757	1.69	1.69
2.33	1.43	10.8	6.06	4.61	5.32	6.05			2.81	0.932	3.65	-0.552	-1.32	2.08	1.67
2.3	1.89	11.3	3.48	4.13	2.66	6.29			2.64	1.67	2.5	0.76	-1.1	1.24	2
1.01	1.91	10.8	4.11	2.97	4.96	4.79			3.06	2.1	3.88	2.16	-1.01	3.75	1.63
2.04	1.37	10.5	5.65	2.69	3.66	5.1			2.25	4.31	3.38	4.92	-0.435	1.85	1.72
2.27	1.22	10.7	4.45	3.73	4.65	5.94			2.33	3.8	3.05	5.29	-0.503	3.45	0.542
2.57	1.44	12.1	3.57	3.44	6.29	5.24			2.04	3.83	2.18	3.44	-0.652	3.73	0.466
2.57	1.75	11.8	4.32	5.4	5.67	4.83			2.28	3.11	2.04	1.67	-0.558	3.31	0.489
1.93	1.36	11.4	5.15	4.19	5	5.55			2.11	4.15	3.06	3.56	-0.323	4.73	0.455
2.32	1.09	10.8	5.51	3.93	4.63	6.18			2.16	4.82	2.92	3.45	-1.18	3.92	0.997
2.28	1.42	11.1	3.85	4.92	4.69	6.52			3.27	3.72	1.27	4.18	-0.935	2.4	1.13
2.07	2.54	13.5	3.36	3.73	4.21	6.85			2.59	2.89	0.695	5.17	-1.16	3.05	0.85
2.22	2.15	15.2	4.18	4.07	4.26	6			2.25	1.88	2.75	5.21	-1.49	2.91	0.627
1.99	1.37	11	4.55	4.37	3.45	6.59			2.27	1.69	2.49	5.28	-0.932	2.58	0.842
2.54	0.689	13.2	5.13	4.18	4.22	7.25			2.84	2.44	1.85	3.53	-0.237	4.64	1.45
2.64	0.835	12.2	4.48	3	3.94	6.7			2.61	0.809	3.48	4.17	0.325	2.96	1.84
2.64	1.27	10.7	4.99	3.69	5.44	7.14			2.75	0.228	2.16	4.22	0.217	3.09	1.74
2.87	0.313	10.8	4.23	3.34	3.71	6.57			2.61	0.267	0.398	3.8	0.408	2.85	1.85
3.59	0.796	12.9	4.63	3.19	3.98	6.22			2.13	1.68	1.18	5.16	0.0379	2.57	1.48
4.01	0.307	11.7	2.97	2.97	6.07	6.46			2.27	0.689	2.05	5.46	0.376	1.76	2.29
4.72	0.309	11.3	4.74	5.7	3.88	6.64			1.89	1.8	2.92	5.35	0.527	2.08	1.97
4.75	0.616	12.5	4.24	5.59	6.18	6.41			2.34	2.34	3.88	4.46	0.336	3.55	2.4
4.34	0.345	11.6	5.83	4.99	4.34	6.25			2.71	2.87	1.42	4.74	0.667	4.63	1.75
4.5	0.688	9.18	5.77	4.67	4.22	5.44			2.76	3.95	3.37	4.91	-0.113	3.96	2.19
4.67	-0.0652	13.1	3.44	3.33	4.01	5.42			2.78	1.78	1.51	6.04	0.077	3.49	1.54
4.33	0.506	12.1	3.38	3.33	5.24	5.99			2.39	3.71	3.34	5.63	0.551	5.33	2.58
4.1	0.233	13.7	3.59	2.13	3.53	4.34			2.91	4.43	1.51	5.04	0.477	4.27	2.18
2.81	0.353	12.4	4.58	2.6	3.52	4.22			2.56	4.29	3.32	5.45	1.09	2.62	3.63
3.87	-0.116	12.5	4.8	3.31	4.8	5.59			2.47	3.84	1.06	5.56	2.55	4.01	2.67
3.4	1.18	12.2	4.52	4.05	4.91	6.84			3.06	2.77	2.13	5.7	1.58	3.57	3.04
3.23	2.12	12	4.07	3.12	3.98	5.62			2.94	0.967	2.73	5.58	1.57	2.53	2.99
3.02	1.99	11.3	5.65	4.37	2.36	4.99			1.63	1.69	1.39	4.87	1.11	2.46	2.44
3.25	0.56	12.1	3.86	3.52	4.57	4.99			2.46	2.55	3.09	6.11	0.964	3.35	2.24
2.9	0.712	11.1	3.5	3.39	4.84	5.22			1.73	4.75	4.79	4.99	0.716	1.52	2.69
2.72	1.65	12.6	3.93	2.84	4.08	5.11			1.8	3.75	3.97	3.32	1.5	3.07	2.63
2.71	0.0798	10.9	3.5	3.11	4.35	5.34			2.35	3.06	2.65	2.38	1.83	1.54	3.09
3.01	0.145	10.6	4.45	1.63	2.77	5.38			2.33	1.68	2.8	4.08	1.75	1.04	2.89
3.4	0.778	11.2	4.11	1.78	4.56	5.52			1.76	1.97	2.38	4.12	0.587	1.16	2.51
2.84	1.29	11.7	6.08	2.54	4.04	6.73			1.9	-0.567	3.73	4.44	-0.137	3.74	2.57
1.27	0.0689	10.3	3.52	2.67	4.79	5.97			2.58	0.708	0.707	2.72	0.992	2.75	2.54
1.63	0.978	10.3	4.11	2.98	3.97	6.28			3.02	0.47	1.88	4.32	0.241	2.28	3.08
1.4	-0.534	10	3.33	2.34	4.78	6.69			2.56	0.578	1.02	3.04	0.38	2.65	2.78
0.865	0.212	13	3.51	3.22	4.64	5.79			2.67	-1.03	2.64	1.75	-0.391	1.46	1.95
0.932	1.19	12.1	5.23	2.07	2.99	5.6			2.76	-1.38	2.73	3.19	0.163	0.416	2.99
1.37	1.93	11	3.38	2.93	2.93	5.03			2.59	-0.795	3.74	4.33	0.377	0.541	3.33
2.07	0.765	10.7	4.8	3.49	3.18	3.92			2.16	-0.946	4.4	3.87	-0.247	0.298	3.11
1.95	0.955	9.65	5.48	3.74	2.99	3.83			2.07	-0.555	2.16	3.48	-0.629	1.16	3.34
1.76	1.12	13.7	4.22	4.19	4.97	4.37			2.25	1.17	0.73	1.92	0.01	1.78	3.39
1.89	1.51	11.4	3.42	2.44	3.67	4.7			2.42	0.923	1.31	1.5	-0.619	2.3	2.58
1.92	0.874	11.2	3.12	2.62	5.33	5.75			1.98	-0.401	1.64	1.73	-0.444	4.7	2.09
0.932	0.78	10.9	1.89	3.66	5	5.65			2.23	-1.73	0.108	1.72	-0.0408	3.97	2.27
1.01	1.5	11.5	1.43	3.63	1.7	4.98			2.46	0.559	1.12	1.55	-0.438	1.96	1.3
1.72	1.37	9.88	2.52	3.67	2.95	5.32			2.28	-1.62	0.0811	3.58	0.336	3.95	1.5
1.52	2.14	11.4	2.98	3.32	5.97	6.19			1.48	-1.5	0.534	3.95	1.05	3.32	1.02
-0.65	0.945	10.6	5.09	1.29	4.06	6.88			2.32	0.321	-0.374	3.79	1.37	2.58	0.526
0.569	0.6	10.2	4.55	2.8	4.26	5.95			1.64	0.263	0.301	3.52	2.18	2.57	0.649
1.36	0.989	12.6	3.76	1.68	3.68	5.63			2.25	-0.11	0.496	3.57	1.88	3.73	0.183
0.428	2.2	11.1	4.87	1.54	3.93	6.61			2.29	0.685	1.51	3.14	1.37	2.54	0.958
1.6	1.43	12	6.07	2.37	3.6	5.49			1.72	-0.181	0.137	3.73	1.77	3.29	1.92
1.98	1.73	12.6	3.17	1.99	2.61	6.04			2	-0.0316	0.135	1.89	0.944	1.84	2.24
2.63	1.86	11.5	4.74	1.96	4.21	5.52			1.64	0.831	1.1	2.62	1.01	2.08	1.77
2.51	0.643	11.7	3.95	3	4.78	4.8			3.17	0.538	0.377	2.58	0.582	2.7	1.99
1.55	1.02	13.1	4.66	0.525	3.9	4.47			2.26	-0.48	0.0284	1.78	0.346	3.08	2
1.99	1.12	10	4.81	2.83	2.58	4.79			2.18	-0.826	0.159	0.00688	0.233	2.89	2
2.25	0.708	10.2	3.55	2.14	3.68	3.75			2.47	-0.0807	0.6	1.75	-0.702	3.94	1.81
1.34	0.585	11.5	3.57	2.27	2.73	4.44			2.67	1.38	1.51	0.481	0.223	2.06	2.35
0.432	0.371	9.01	3.79	1.61	3.96	3.7			2.33	1.79	0.627	-1.9	0.886	1.83	1.79
0.0784	0.634	10.3	3.58	2.04	3.38	4.49			1.28	-0.426	1.04	-1.65	0.926	2.7	1.79
0.299	0.208	9.95	3.76	-0.479	3.61	4.77			2.14	1.66	0.738	0.796	1.01	3.58	1.99
-0.0653	0.468	11.2	1.89	0.959	4.15	4.21			1.82	0.638	0.74	0.847	-0.685	3.83	1.43
0.582	-0.488	10.1	4.35	1.54	2.74	5.12			1.68	0.98	0.416	0.996	-0.061	3.12	1.11
1	0.386	10.4	4	2.83	2.2	5.59			1.61	1.42	2.02	1.52	0.296	2.49	1.48
2.67	0.905	10.6	2.29	2.32	2.97	5.38			1.25	-1.26	3.2	2.56	1.07	2.88	1.42
1.2	0.36	9.56	4.01	0.559	5.27	5.1			1.82	-0.631	-0.258	0.3	0.83	2.78	1.21
1.56	-0.0636	12.7	2.86	0.711	2.22	4.75			2.37	0.0986	0.465	-0.61	0.973	4.57	1.27
2.13	0.518	10.9	4.3	2.99	1.74	5.9			2.67	-1.8	1.86	0.23	1.64	4.89	1.14
3.01	0.908	10.3	3.8	2.02	3.37	4.63			2.25	-1.02	1.32	0.158	0.861	3.48	1.58
1.04	0.316	9.83	3.47	1.48	4.92	4.56			2.65	-1.04	0.787	-1.29	0.464	3.27	1.01
1.81	0.259	9.14	3.02	2.18	4.89	4.01			2.17	-0.563	-0.111	-1.56	-0.0953	3.04	1.01
2.89	0.438	9.45	2.45	2.81	3.4	4.98			2.52	0.633	2.67	-1.54	-0.427	2.27	1.57
1.99	-0.36	8.16	3.7	3.22	3.12	4.71			2.69	0.622	2.99	-2.95	0.836	3.79	1.14
3.39	-0.147	8.76	4.88	2.53	4.14	4.51			2.28	1.28	2.37	-2.12	0.717	3.06	0.991
3.25	1.1	10.7	3.69	2.21	5.05	3.7			2.22	0.227	2.17	-2.47	1.13	3.51	0.858
3.52	0.593	9.83	2.74	3.78	4.01	3.63			2.1	0.245	1.95	0.106	1.43	4.53	0.755
3.91	-0.114	8.71	1.86	1.73	4.35	3.15			2.03	-0.653	1.25	0.888	0.452	2.62	0.959
4.95	-0.00942	9.67	3.96	1.39	3.31	2.14			1.85	-0.866	0.657	-0.527	1	2.52	2.28
6.03	0.325	9.31	4.64	1.68	2.55	2.57			2.21	2.05	1.49	-0.566	0.762	2.08	1.32
6.42	-0.619	10.5	2.18	2.47	2.16	3.13			2.28	1.06	2.18	0.37	0.41	2.77	1.25
6.56	0.0101	8.88	2.14	4.04	1.91	2.76			1.67	1.28	1.16	0.13	-0.307	3.18	1.7
7.14	-0.164	8.65	2.51	3.32	2.24	2.92			2.07	-0.239	-0.821	-0.223	-0.431	2.93	1.3
7.69	0.116	9.4	4.35	3.49	1.33	2.6			2.06	0.16	0.585	-0.894	0.721	3.39	1.67
6.99	1.17	10.2	2.68	1.84	2.35	3.23			0.981	-0.101	-0.442	-0.88	-0.357	3.45	1.38
5.56	-0.129	10.9	2.16	0.47	1.36	2.14			1.68	-1.09	0.764	-0.258	-0.0803	2.81	1.24
4.58	1.26	8.88	2.73	1.86	0.966	2.99			1.93	0.337	1.18	-0.175	-1.19	2.47	1.45
5.87	0.689	10.8	1.85	3	0.889	3.72			1.68	-0.135	1.38	0.665	-1.41	1.05	1.18
5.12	1.24	9.29	1.91	1.86	0.856	2.5			1.45	0.527	1.28	-1.12	0.0861	2.88	1.42
6.08	0.989	10.3	1.67	2.24	1.94	3.57			1.37	2.69	0.441	-0.972	0.589	3.23	2.18
4.99	1.4	10.9	0.715	2.69	2.71	3.29			1.22	1.53	-0.506	-0.243	0.219	2.88	2.44
5.73	0.432	11.3	2.12	2.34	0.388	3.91			1.83	5.14	1	-0.241	0.402	1.74	2.85
4.69	0.942	7.35	2.45	2.35	1.39	4.06			1.57	3.34	-0.44	0.0402	-0.164	2.6	1.63
4.91	0.149	8.34	2.8	3.22	0.946	4.22			1.28	2.83	1.1	0.693	-0.127	2.41	1.57
5.38	1.11	10.5	0.923	4.61	0.937	4.41			1.97	2.05	0.658	0.88	-0.0788	3.06	1.52
5.45	0.408	11.8	0.847	2.61	1.73	4.5			2.22	3.08	1.54	0.805	-0.948	1.62	1.85
4.94	0.169	9.25	1.09	1.86	2.22	4.24			2.12	2.28	2.31	0.065	0.0539	2.16	2.06
4.39	1.34	9.45	2.08	3.22	3.22	4.84			1.54	2.39	1.42	-0.714	-0.00717	1.61	2.34
3.86	0.76	8.57	1.62	3.6	1.56	3.92			1.31	1.1	-0.757	-1.8	0.59	1.66	2.55
4.13	0.131	8.49	1.22	3.61	-1.14	4.05			2.06	1.45	1.32	-2.35	0.279	1.27	2.42
2.8	0.839	10.4	0.903	3.34	1.44	4.64			1.99	-0.304	1.42	-2.22	0.116	1.33	1.79
1.94	0.679	9.07	1.82	4.97	1.86	5.01			1.59	0.598	1.22	-3.79	-0.642	0.254	2.76
1.83	-0.182	8.95	2.65	1.59	2.6	5.46			1.76	-1.42	-1.57	-4.1	0.305	0.73	1.47
2.26	0.779	9.44	1.21	2.18	2.88	6.72			1.97	-0.459	-1.16	-2.39	0.399	0.75	2.33
2.73	1.27	7.1	3.22	1.34	3.45	7.33			1.56	0.0377	-1.21	0.731	-0.795	0.997	2.39
2.82	-0.147	8.5	0.797	3.16	3.33	6.71			2.33	0.716	-0.0415	0.34	-0.754	1.93	1.93
1.87	0.268	11.4	0.655	3.53	2.69	6.47			1.39	0.641	-1.71	0.451	0.0331	2.11	2.05
2.25	0.0353	8.28	2.11	2.96	4.03	5.17			1.36	0.369	-1.38	-0.838	0.958	2.69	2.02
2.82	-0.669	7.8	4.04	3.47	4.49	4.69			1.76	0.845	-1.81	0.0654	0.535	3.44	1.63
1.19	-0.111	7.91	0.36	2.88	2.03	6.76			1.6	1.01	-0.905	0.435	-0.625	1.47	1.46
1.69	-0.082	6.9	2.14	3.33	4.25	8.44			1.94	3.2	-0.193	0.26	-1.83	1.19	1.22
1.55	-0.102	8.23	1.04	3.46	5.19	7.15			2.49	2.06	-0.501	0.302	-1.82	3.18	2.25
1.32	0.578	9.64	0.856	4.53	4.81	8.12			1.61	1.12	-0.223	-0.819	-0.165	1.76	1.41
0.986	-0.15	6.54	1.05	2.03	4.15	6.68			1.96	1.55	-0.846	-2.64	-0.702	1.92	0.948
0.875	-0.196	8.44	0.94	1.76	3.91	7.22			2.41	0.479	-0.537	-0.885	-0.394	2.05	2.65
1.12	0.618	7.37	2.75	1.22	6.06	7.06			1.37	-0.682	-0.438	-1.43	-0.176	1.47	2.34
0.389	-0.586	7.22	3.38	2.73	2.42	6.26			2.04	1.59	-1.69	-1.26	-0.811	0.704	2.08
1.01	-0.354	8.39	3.43	2.23	4.17	5.15			2.08	1.59	0.158	-1.85	-1.2	0.763	2.23
-0.627	-1.01	6.99	2.02	1.72	3.09	4.51			2.04	-0.647	-1.56	-1.52	-1.32	0.719	2.42
0.122	-0.934	10.5	1.21	2.85	4.87	4.65			1.49	1.4	-0.703	-0.748	-1.03	1.01	2.67
0.747	0.0126	8.2	1.84	3.87	3.78	3.45			1.88	0.212	-0.915	-0.0315	-1.94	0.478	2.17
1.44	-0.6	8.5	2.95	1.99	2.96	2.3			1.15	0.174	-0.307	-1.8	-1.38	0.44	2.51
1.4	-0.832	10.1	2.34	2.13	5.17	2.57			1.11	1.76	0.702	-1.87	-2.06	0.45	1.17
1.82	-0.197	10.5	0.468	3.09	3.1	3.05			1.23	-1.93	0.0309	-1.33	-1.21	0.288	0.234
2.22	-0.399	8.88	1.78	1.14	3.64	3.41			1.75	-0.606	0.247	2.98	-0.717	0.951	0.0166
3.24	-0.679	8.11	0.912	2.46	2.65	5.09			1.33	-0.835	-0.918	2.89	-0.589	-0.436	-0.328
2.38	-0.152	7.23	1.83	1.35	4.94	4.12			1.75	-1.17	-1.61	0.822	-1.79	0.563	0.403
2.98	-0.123	10.7	3.19	3.41	3	3.05			2.69	1.59	-0.546	-2.21	-1.07	0.355	0.987
3.15	-0.617	10.6	2.46	3.03	4.46	2.8			2.16	2.39	1.91	-2.94	-0.855	0.807	0.268
4.73	-0.434	9.45	1.09	1.39	2.95	1.12			1.74	0.833	-0.411	-2.2	-1.6	-0.0749	0.156
3.86	-0.627	8.6	2.08	3.45	3.33	1.62			1.25	-1.6	0.124	-1.48	-1.08	-0.235	0.0457
3.31	-0.79	9.24	1.87	2.31	3.25	2.53			1.85	-0.782	0.133	-0.326	-0.943	-0.618	0.116
3	-1.39	9.47	1.44	2.33	3.23	3.11			2.04	-0.159	1.08	0.15	-0.493	1.01	-0.101
3.01	-0.216	8.55	2.14	3.89	4.2	3.07			1.38	0.648	-1.56	-2.83	-1.36	1.33	0.0553
2.15	-0.622	9.58	1.65	4.71	3.41	2.9			1.39	2.02	0.173	-3.78	-2.94	2.53	0.0485
0.487	-0.493	7.88	2.89	3.18	4.27	1.27			1.55	0.969	0.387	-5.3	-1.69	1.67	-0.0241
0.693	-1.67	8.63	1.79	3.51	3.89	1.05			2.07	0.115	-0.323	-4.62	1.02	2.33	-0.424
0.661	-0.936	9.03	2.69	3.38	3.82	0.819			1.67	-0.158	0.171	-2.23	1.64	0.455	0.289
2.68	-0.813	9.11	1.36	4.77	3.19	1.72			2.11	-0.562	-0.28	-2.81	2.2	2.07	-0.0717
3.07	-0.00796	6.41	3.94	2.87	3.47	2.2			2.15	0.0214	-0.976	-0.902	0.76	2.62	0.299
2.6	0.468	9.7	2.07	2.73	3.44	0.853			1.86	0.545	-0.0507	-0.997	-0.588	2.88	0.96
1.18	-1.25	6.78	1.26	3.06	4.96	2.74			1.68	-0.232	0.384	-1.68	0.33	3.05	0.315
-0.187	0.0999	7.73	1.79	1.16	2.81	1.92			2.31	0.368	2.42	-3.38	-0.0748	2.74	-0.89
0.25	0.335	8.81	2.05	2.53	4.31	1.56			1.77	0.199	1.53	-0.867	0.212	2.82	-0.701
0.886	-0.465	8.03	2.35	1.35	1.98	2.79			1.56	1.5	-1.36	0.896	-0.457	2.94	-1.4
0.255	-2.04	9.58	1.2	3.32	2.61	2.26			1.66	0.674	0.0416	0.534	-0.804	1.93	0.473
0.431	-0.206	9.1	1.43	3.42	2.66	2.73			0.915	0.627	0.541	-0.344	-1.08	2.12	-0.611
0.197	-1.16	9.33	2.45	2.71	2.75	2.98			1.25	2.65	1.62	-1.05	-1.39	2.89	-0.3
0.657	-0.339	8.6	2.71	1.7	1.43	1.74			1.14	2.17	0.594	-1.79	-0.799	2.26	-0.387
-0.35	-0.991	9.57	2.05	2.84	2.57	0.741			0.773	1.54	0.0485	-0.688	-0.614	3.05	0.314
0.617	-0.309	7.98	1.9	2.43	3.94	1.56			1.79	0.586	0.36	-0.876	0.541	3	-0.0513
0.159	-0.481	9.5	4.46	2.23	0.891	1.41			0.997	1.49	-0.321	-1.14	1.02	2.79	0.0214
0.136	0.274	9.9	2.69	1.26	2.79	0.679			1.45	-0.0434	-0.231	-1.07	-0.265	2.22	0.151
-0.0557	-0.478	10	1.97	3.84	3.19	1.49			0.937	0.016	-0.5	0.0761	-1.13	1.31	0.233
-0.637	-0.881	10.3	1.96	5.31	3.07	0.803			0.372	0.371	0.521	-0.0209	-1.09	3.36	0.135
-1.29	-0.759	10.2	2.05	2.87	2.53	1.32			1.12	1.01	0.522	-0.144	-0.382	3.67	-0.224
-0.189	-0.464	10.3	2.46	2.32	2.59	1.29			0.968	1.71	1.86	0.724	-1.26	3.8	0.0227
-0.319	-0.856	8.33	1.5	2.19	2.82	1.37			0.72	1.27	-0.533	0.558	-1.09	1.96	-0.4
0.392	-0.605	11.1	2.58	3.36	2.57	1.91			0.932	0.674	-0.22	-0.175	-1.88	1.85	0.132
-0.349	0.989	9.03	2.48	1.58	0.807	1.73			1.07	2.28	0.769	-1.05	-1.66	1.49	-0.279
-0.409	-0.1	8.56	1.6	2.95	1.26	0.92			1.51	2.25	0.855	-1.45	-2.19	1.3	0.787
-0.105	-0.626	6.44	2.63	4.98	3.19	1.53			0.875	3.28	0.504	-1.39	-1.7	2.31	0.812
-0.397	-0.969	6.81	2.09	4	1.79	2.34			0.266	2.43	0.501	0.847	-2.21	1.44	0.748
-0.816	-0.191	10.2	2.99	3.24	3.42	2.36			0.807	2.11	-0.204	1.47	-1.75	1.96	0.219
0.00384	0.376	7.73	3.07	1.26	4.3	1.88			1.33	-0.414	1.14	0.145	-1.43	1.05	0.28
-0.869	-0.242	9.01	2.13	3.45	3.59	2.23			1.54	0.93	-0.644	0.261	-1.01	2.39	0.146
-0.777	0.332	6.42	3.86	1.96	2.74	1.86			1.62	-0.0472	0.615	-0.0348	-2.02	3.34	-0.0784
0.219	1.04	7.78	4.84	3.34	1.82	0.804			2.35	0.9	0.78	0.843	-2.39	3.66	0.0756
0.00356	-0.462	8.27	0.765	2.68	2.81	1.5			1.56	0.179	1.43	0.877	-0.538	3.58	-0.00511
0.194	-1.03	9.15	0.386	2.44	3.54	2.44			1.69	1.48	1.02	2.15	1.42	4.04	0.229
0.605	-0.811	9.1	2.5	4.09	4.22	1.57			1.57	0.0368	-0.569	3.83	2.27	4.37	0.179
1.27	0.385	7.82	1.55	1.75	3.61	1.87			1.23	-1.29	1.49	3.85	3.75	3.8	0.724
0.447	0.873	6.55	3.07	2.77	0.918	1.37			1.44	0.945	0.321	3.27	3.04	4.61	-0.331
-0.927	0.117	6.43	1.6	2.01	1.11	-0.0946			2.02	1.9	0.605	2.08	2.3	3.45	0.215
-1.45	-0.801	6.7	4.04	1.77	3.29	0.0102			1.5	2.29	0.242	0.754	3.28	4.59	0.052
-0.578	0.987	8.21	3.6	2.83	2.71	0.469			1.85	0.17	0.291	1.08	2.77	2.93	-0.0625
-0.663	0.538	8.91	1.81	2.58	2.36	0.112			1.09	2.53	-0.387	1.84	3.35	3.41	-0.306
1.5	0.693	6.85	2.62	2.12	3.04	1.9			0.603	0.339	1.7	1.58	2.54	3.05	-0.277
1.31	0.531	7	2.91	2.32	2.01	1.39			0.578	0.932	-0.517	1.36	2.07	2.83	-0.704
0.596	1.2	7.68	2.87	2.66	1.99	1.88			0.816	0.476	0.819	0.593	2.08	1.9	-0.176
0.544	-0.682	5.48	2.56	4.41	2.15	0.809			1.25	2.07	0.0246	0.41	2.16	1.95	-0.342
-1.22	-0.466	5.39	1.9	2.93	3.07	0.979			1.29	3.34	0.353	0.559	2.37	2.94	-0.522
-0.485	0.669	4.12	2.32	2.73	3.74	0.229			0.683	2.94	-1.17	1.37	1.49	3.05	-0.558
-0.626	0.627	6.99	2.2	4.32	3.23	0.65			1.16	2.17	-0.0828	2.67	2.18	1.74	-0.951
0.751	0.671	6.69	2.2	4.47	3.7	0.999			1.09	2.68	-0.528	2.84	2.37	3.96	-0.856
0.293	0.76	8.71	1.68	1.7	0.927	2.15			1.41	2.72	1.55	3.02	1.95	3.83	0.271
0.404	-1.06	5.77	1.53	2.85	4.25	1.22			1.47	1.86	0.808	1.02	1.61	4.9	-0.455
0.165	-0.714	5.43	2.32	1.62	1.57	1.96			1.56	2.48	-0.188	0.876	1.53	4.56	-0.177
0.913	-0.138	4.32	2.63	3.47	2.67	0.912			1.33	2.71	-0.367	0.83	2.17	3.64	-0.766
2.26	-0.624	4.75	2.23	2.38	2.6	1.29			1.39	3.34	-0.597	0.722	1.85	2.56	-1.45
2.16	-0.165	6.71	2.19	3.91	2.2	0.99			0.928	3.96	0.401	0.619	2.16	3.08	-1.07
3.6	-0.213	7.31	2.34	3.12	0.462	0.537			1.56	3.99	0.161	2.15	1.25	3.16	-0.695
3.21	-0.33	5.74	1	4.09	0.777	0.424			1.03	3.84	0.577	2.99	0.924	2.79	-0.827
2.72	-0.176	8.03	2.23	3.33	2.71	1.32			1.24	3.95	1.61	2.08	0.845	2.56	-0.772
3.04	-0.323	6.74	1.25	2.14	3.62	0.362			1.78	5.04	-0.258	2.09	0.887	2.85	-1.28
2.78	-1.34	6.2	1.1	2.31	1.74	0.949			1.44	4.9	-0.116	2.5	0.617	2.03	-1.47
2.52	-0.957	5.93	1.88	2.64	3.82	2.02			1.74	3.23	-0.496	2.25	-0.467	2.74	-2.01
3.35	-0.339	6.25	3.13	1.87	1.05	0.873			1.2	5.49	-1.3	1.84	0.729	2.26	-1.37
3.23	0.0136	6.4	2.72	3.45	2.09	0.581			0.628	4.47	1.07	1.17	1.04	2.35	-1.64
4.01	-0.301	6.27	0.948	0.259	1.54	-0.186			1.17	3.53	0.0876	0.771	1.1	3.21	-2.29
2.83	-0.735	6.18	2.39	1.21	1.83	0.897			1.1	2.61	0.85	0.505	0.296	3.15	-1.49
3.33	0.749	6.26	1.74	1.8	1.52	1.53			1.13	2.86	-1.64	0.526	-0.46	2.97	-1.97
2.68	1.1	7.07	3.56	0.399	2.73	2.26			1.18	3.1	-1.05	-0.219	0.222	3.47	-1.95
2.71	0.549	5.02	3.86	0.85	2.09	1.81			0.499	4.95	0.0796	0.591	-0.0057	3.35	-2.92
1.83	0.0681	5.1	2.4	1.79	1.83	0.478			1.45	3.69	-0.457	-0.0903	-0.809	4.36	-1.47
2.4	-0.716	4.83	3.45	2.33	2.7	-0.578			0.615	4.38	0.86	0.281	0.681	3.72	-2.21
3	-0.385	6.26	2.75	2.83	0.0266	-0.201			1.07	4.61	-0.521	0.00799	-0.319	2.29	-1.85
3.49	-0.215	6.11	6.23	2.76	2.97	-1.42			0.941	4.96	0.646	0.893	0.672	3.76	-1.49
2.77	-1.04	5.37	1.78	2.14	2.94	0.216			0.552	3.04	1.43	0.059	0.117	5.32	-1.87
2.82	-1.25	4.14	1.36	2.67	3.4	0.934			0.279	1.46	-0.277	0.63	0.265	2.78	-1.04
2.76	-0.708	3.66	1.7	0.376	0.808	0.578			-0.0489	2.69	1.59	0.885	0.181	2.94	-1.89
2.12	0.375	6.48	3.94	1.75	1.01	0.229			0.991	2.67	-2.55	0.616	0.5	4.22	-1.97
2.24	-0.833	6.4	3.37	1.25	0.932	-1.27			1.25	1.29	0.196	2.26	-0.507	4.09	-1.81
2.18	0.995	6.86	2.84	1.23	2.48	0.0205			0.671	1.98	0.239	2.25	-0.244	3.54	-1.91
2	1.13	5.99	1.95	2.43	2.14	0.0312			0.479	1.94	-0.549	-0.156	-0.0681	3.74	-1.79
0.961	-0.0621	5.06	0.98	-0.725	0.856	1.59			1.44	3.29	1	0.0984	0.498	4.17	-1.62
-1	-0.444	6.81	2.71	2.08	1.4	1.24			1.67	2.73	2.51	-1.27	-0.212	4.81	-1.97
-0.542	0.0143	5.74	2.12	2.67	1.49	0.953			0.717	3.02	1.32	-0.533	-0.554	4.78	-1.41
-0.667	1.6	4.48	2.66	3.92	2.1	1.29			0.721	0.817	-1.15	-1.14	-1.35	3.84	-0.84
-0.95	-0.0676	3.63	2.89	0.943	2.47	0.598			0.807	0.44	0.325	-0.189	-2.37	4.46	-1.47
-0.839	-0.552	4.97	1.74	2.4	1.53	2.17			0.531	1.45	-0.305	-2.47	-2.3	1.5	-1.17
-0.326	0.69	5.53	0.69	0.972	1.16	1.39			0.413	2.28	-0.395	-2.11	-2.23	2.46	-0.697
-0.522	0.163	6.44	2.25	0.746	1.45	1.86			-0.598	2.72	0.0207	-2.26	-2.47	2.09	-0.823
0.0109	-1.05	4.3	2.24	2.76	0.72	2.13			0.234	1.49	-0.278	-2.44	-3.46	2.61	-1.03
0.707	-0.607	2	3.3	1.53	2.63	1.48			-0.0954	2.49	-0.00292	-0.769	-2.92	3.06	-1.59
0.173	0.046	3.77	2.23	1.57	2.8	1.89			0.758	2.2	-1.75	0.62	-2.86	2.67	-1.68
-0.243	0.195	6.18	3.53	-0.133	1.36	2.08			0.41	2.34	-0.64	0.718	-2.61	1.58	-1.72
-0.0988	0.451	4.6	2.62	1.47	1.75	2.67			0.598	1.66	-1.26	0.538	-1.9	2.26	-1.49
-0.802	-0.0131	5.85	2.87	2.02	2.03	3.17			-0.119	2.39	-1.29	0.588	-1.43	2.81	-0.844
-0.954	0.181	3.03	1.49	1.28	0.913	2.68			0.516	1.79	-0.725	-0.908	-1.34	4.35	-0.987
-1.82	0.519	4.79	1.94	1.78	2.15	1.68			-0.197	2.56	-1.38	-1.5	-1.43	5.03	-0.819
-3.82	0.612	4.51	2.6	0.93	0.635	1.68			0.557	0.656	-1.77	-0.0344	-1.09	2.42	-0.42
-3.67	0.164	6.01	2.34	0.474	2.14	1.5			0.893	-0.942	-1.94	-0.0162	-0.904	2.65	-1.2
-1.75	-0.101	3.74	2.45	-0.483	0.369	0.153			0.853	0.199	-0.931	1.44	-0.922	4.51	-1.06
-1.73	-0.201	3.59	1	-0.715	0.547	0.821			0.594	1.06	-0.534	2.55	-1.51	4.11	-1.66
-1.68	0.0209	6.34	2.04	-1	0.581	0.101			0.96	0.541	-1.95	1.11	-0.846	4.46	-1.3
-1.07	0.365	4.53	2.58	2.61	2.07	1.05			0.249	1.77	-1.17	1.37	-0.824	2.57	-1.28
-0.542	-1.16	5.04	2.14	1.04	-0.285	0.536			0.672	1.71	-1.76	0.39	-1.61	1.8	-1.21
0.238	-0.269	5.33	2.83	2.51	0.842	1.5			0.556	2.06	-1.5	1.58	-2.18	3.54	-0.572
0.205	-0.446	5.37	3.81	-0.516	0.209	1.45			0.344	1.28	-1.68	1.92	-2.17	3.95	-1.28
-0.251	0.747	4.37	2.94	-0.941	1.14	1.32			0.0423	-1.69	-2.33	1.83	-0.597	4.02	-1.27
-1.58	0.686	5.66	1.39	2.21	1.75	1.83			0.7	-1.22	-2.05	-1.23	-1.4	4.02	-1.16
-3.9	0.653	5.61	2.08	2.62	1.07	1.74			0.0423	-0.249	-3.12	-2.97	-1.75	3.65	-0.136
-2.09	-0.352	2.89	2.41	1.68	-0.18	1.61			-0.0388	2.63	-0.77	-3.07	-1.21	2.85	-0.477
-0.916	0.266	4.53	2.02	1.95	-0.136	1.2			0.0716	0.743	-0.229	-2.28	-1.46	3.34	0.463
-1.47	2.26	5.27	3.12	1.11	-0.0144	-0.173			-0.0102	1.26	-0.871	-1.74	-0.461	2.83	-0.565
-1.28	0.314	4.59	1.92	-0.017	1.34	0.38			0.654	0.127	-1.76	-0.369	-0.837	3.49	-0.69
-1.75	0.436	7.21	2.07	1.08	0.4	0.573			-0.419	-0.376	-0.0188	-0.462	-2	3.33	1.01
-3.18	-0.839	5.67	1.93	1.15	-1.43	1.39			-0.824	-0.317	0.0271	-0.00661	-1.43	3.97	-0.705
-1.94	0.42	6.53	2.21	1.48	0.638	-0.011			0.042	0.221	-2.08	-1.1	-1.63	3.63	-9.47e-05
-2.51	2.1	6.64	1.27	1.21	1.32	0.471			-0.00448	1.27	-0.0203	-0.544	-2.22	2.2	-0.191
-1.37	0.562	5.05	1.41	0.399	0.106	-0.135			0.622	1.76	-2.22	0.0471	-2.16	2.58	0.183
-1.01	1.64	6.09	1.2	2.18	0.213	0.167			0.793	0.69	-2.44	-0.32	-1.45	2.11	0.45
-1.53	0.578	5.16	1.16	1.8	-0.187	-0.031			0.715	1.31	-1.43	-1.96	-1.51	2.06	1.08
-2.01	-0.273	5.37	3.59	1.22	-1.73	0.338			0.478	1.25	-1.1	-1.4	-1.47	2	0.808
-2.19	-0.718	5.43	3.65	2.3	-0.635	0.619			0.48	0.36	-1.39	-1.16	-2.05	1.83	0.313
-3.18	-0.104	3.66	2.35	2.74	1.16	0.193			0.893	1.81	0.0685	-0.284	-1.15	0.455	0.695
-1.37	-0.412	3.87	2.53	4.63	-0.233	0.0868			0.786	1.95	-0.663	0.216	-0.519	-0.209	-0.00238
-0.808	-1.33	3.76	2.83	1.78	0.861	0.979			0.566	-0.58	-0.328	1.34	-0.647	1.59	-0.174
-1.11	-0.0261	3.32	2.56	3.95	1.25	1.57			0.316	-1	-0.741	1.9	-0.145	1.42	1.84
-2.15	0.412	2.51	1.2	2.89	0.555	3.02			0.658	2.18	-0.832	4.73	-0.743	2.28	1.48
-1.48	1.37	4.19	0.448	3.73	-0.0418	2.12			1.04	0.85	-0.375	6.31	-0.584	1.4	0.804
-2.58	0.564	5.16	2.11	2.83	0.987	2.52			0.405	0.148	0.0716	5.91	-0.319	3.42	2.02
-3.14	0.729	6.08	1.97	2.5	1.84	1.67			0.645	-0.334	0.815	6.74	-0.782	1.89	2.08
-2.14	-0.268	6.09	3.2	1.19	0.482	2.98			0.598	1.21	-0.114	8.65	0.251	2.08	0.732
-2.31	0.18	3.41	0.658	2.05	1.09	2.03			0.801	1.16	-0.246	7.51	-1.23	2.31	1.05
-1.51	0.0837	4.64	2.12	2.34	1.16	1.88			0.177	2.22	0.248	7.8	-0.502	2.58	0.88
-1.78	-0.989	6.06	1.7	0.828	0.819	3.15			0.721	0.119	-0.164	7.91	-0.227	3.12	2.6
-1.67	-0.127	6.7	2.01	1.4	-0.148	2.15			0.641	-0.995	0.268	7.44	-0.476	3.27	1.04
-1.02	0.591	5.34	0.874	1.83	0.676	2.59			0.63	1.17	-0.873	6.52	-0.739	1.92	1.12
-1.59	-0.57	5.51	2.42	0.439	0.749	2.88			0.231	1.25	-1.31	5.94	-0.942	1.86	0.607
-2.67	-0.264	3.54	1.87	2.28	0.213	2.67			0.0538	-1.06	0.0812	5.05	-0.324	2.79	-0.177
-2.71	0.32	2.01	1.65	1.3	-2.27	2.33			-0.462	0.319	0.522	5.85	-0.51	3.43	0.809
-1.93	0.242	3.8	-0.291	3.04	-0.0865	2.44			-0.134	-1.79	0.803	7.58	-0.98	1.73	1.49
-1.8	-0.49	3.83	2.19	3.71	-0.514	1.64			-0.334	0.62	0.115	7.52	0.252	2.1	2.16
-1.34	-0.579	2.81	2.2	3.94	1.84	1.82			-0.206	0.505	-0.305	9.35	0.0509	0.686	1.63
-1.72	-0.0751	4.06	0.519	3.03	1.02	2.25			-0.574	0.45	0.324	8.13	0.401	2.47	1.16
-2.25	-0.378	4.37	1.68	2.84	1.84	2.89			-0.207	0.415	-0.266	7.02	-0.15	3.8	0.89
-1.75	0.0296	3.78	2.19	1.51	-0.113	1.78			-0.292	-1.1	0.628	8.77	-0.466	2.8	1.02
-0.0543	-1.26	3.59	1.23	3.08	0.277	3.4			-0.888	0.684	-0.0544	7.91	-1.43	2.47	1.59
-0.346	0.476	2.77	2.01	2.82	-0.171	1.58			0.0129	0.375	0.379	8.15	-1.43	2.32	1.63
-0.28	0.613	3.45	1.41	2.48	1.1	2.46			-0.222	-1.18	1.05	8.58	-0.282	2.66	1.24
-0.718	-0.566	4.58	2.1	1.35	1.06	3.07			0.145	-0.273	2.49	8.84	-2.29	3.05	0.852
-0.992	-0.785	3.57	1.13	1.19	2.04	3.32			-0.21	1.19	0.301	7.47	-3.17	1.76	0.56
-3.13	-0.0759	4.06	1.25	2.09	1.72	2.51			-0.489	1.22	0.923	7.47	-3.2	1.81	0.472
-3.02	0.281	0.0646	-0.563	2.36	-0.398	2.64			-0.0941	-0.218	-0.626	6.86	-2.42	3.47	-0.00755
-1.65	-0.419	1.36	3.43	1.95	1.24	2.67			0.134	2.25	-0.167	7.81	-0.469	3.2	0.264
-1.25	-0.295	3.69	2.21	2.74	0.131	0.926			-0.115	1	0.0187	8.47	-0.242	3.58	-0.0687
-2.38	-0.624	3.05	0.957	2.49	0.586	-0.407			-0.0424	2.44	0.34	7.39	-1.08	3.19	0.0109
-2.72	-0.0153	2.8	0.934	2.67	0.386	-0.884			-0.236	2.05	-0.153	7.82	-2.11	2.82	0.894
-2.47	-0.31	2.83	-1.51	2.38	3.98	-0.627			-0.707	2.33	-0.553	5.28	-2.02	4.16	1.66
-3.68	0.297	3.46	1.56	-0.46	2.56	-2.27			0.171	1.86	0.775	5.72	-1.75	3.62	1.85
-1.71	-1.43	4.31	2.34	2.24	1.91	-1.56			-0.44	2.54	-0.161	7.8	-1.71	3.9	2.37
-2.16	-1.39	4.36	-1.1	1.3	1.53	-1.41			-0.454	-0.271	0.436	7.36	-1.36	3.58	0.378
-1.62	0.157	2.59	0.00591	1.99	2.3	0.512			-0.539	3.21	0.74	7.03	-1.33	3.3	1.46
-1.53	-0.432	3.96	2.33	2.34	2.02	-0.478			-0.252	1.19	0.454	7.97	-2.44	4.08	1.84
-2.1	-0.794	3.27	2.66	1.25	0.151	0.189			-0.399	2.48	0.946	5.89	-1.87	4.25	1.31
-1.83	0.0538	4.16	1.76	1.57	0.614	0.331			0.342	4.75	2.85	4.94	-1.69	4.36	1.38
-2.5	0.0984	3	0.665	2.38	1.41	-0.374			0.128	4.38	1.66	5.01	-1.85	3.51	1.46
-2.88	-0.575	1.91	0.562	1.54	0.245	0.0362			0.214	3.43	2.29	5.61	-2.03	4.12	-0.231
-2.47	0.544	3.44	0.957	1.52	-0.409	-0.467			0.737	1.95	1.39	5.76	-2.03	3.16	-0.161
-2.69	-0.238	4.43	-0.584	2.27	-0.559	0.553			0.37	1.21	2.09	5.91	-1.99	3.24	-0.087
-2.48	0.759	2.47	1.6	1.87	1.98	1.81			0.135	2.55	0.563	6.03	-2.33	2.83	-1.6
-1.99	0.198	4.6	1.8	1.12	0.153	2.64			0.398	2.74	2.4	5.69	-1.86	3.45	-1.82
-1.45	-0.058	4.35	2.24	2.43	0.566	2.52			0.235	1.9	0.388	4.69	-2.21	1.74	-0.87
-2.97	-1.36	4.67	0.381	1.03	0.755	1.37			0.515	1.97	-0.0378	5.36	-2.16	2.24	-0.843
-3.17	-0.482	5.65	0.651	1.47	-0.389	-0.206			0.0979	1.67	0.97	5.52	-2.19	0.872	-0.904
-2.75	-0.635	5.32	0.239	1.01	1.28	-1.59			0.314	0.957	-0.00491	5.19	-1.69	1.82	-0.582
-1.07	0.0762	3.6	2.69	1.11	0.287	-1.52			0.227	1.35	-0.605	3.46	-1.84	2.47	-0.124
-1.01	-0.925	5.96	2.29	2.85	0.541	-1.74			-0.00656	0.43	-1.43	4.95	-2.36	2.56	0.137
-0.634	-0.472	0.472	2.13	2.62	2.02	-1.84			0.447	3.31	-1.54	4.45	-2.26	2.62	-0.113
-1.8	-0.402	5.2	1.94	1.82	1.57	-0.872			0.438	2.29	-0.918	4.49	-2.23	4.08	-0.575
-1.81	-0.543	2.79	0.434	2.46	-0.915	-1.42			0.597	2.92	-0.0244	4.77	-1.66	2.43	-0.627
-2.48	-0.0242	2.9	2.36	0.516	-0.606	-1.73			-0.22	3.29	0.719	4.55	-2.28	3.6	-0.795
-2.82	-0.678	4.75	2.08	1.95	1.55	-0.873			0.0152	3.06	-1.02	2.89	-2.25	4.15	0.0522
-1.94	0.733	-0.146	1.31	2.06	1.22	-1.14			-0.0529	2.22	-1.34	2.49	-2.18	2.66	-0.465
-2.29	-0.682	2.63	1.8	2.56	0.302	-1.13			0.745	1.54	-0.307	3.03	-2.36	2.69	-0.676
-2.27	-0.488	2.68	2.05	3.26	-1.26	-1.7			0.833	2.35	0.56	3.19	-2.08	1.69	-0.153
-3.13	0.208	2.42	2.65	2.36	1.55	-1.14			1.12	2.3	-0.575	2.7	-2.59	1.8	-0.855
-2.41	-0.8	4.4	3.46	1.31	-2.05	-1.93			0.81	1.68	-1.92	1.86	-2.05	3.06	-1.02
-2.09	0.183	3.81	0.543	2.75	-1.55	-3.23			0.123	2.69	-0.767	2.83	-1.67	3.68	-1.38
-1.68	-1.54	2.07	1.63	2.14	-0.655	-2.43			-0.114	0.906	-1.43	2.68	-2.23	4.23	-1.26
-2.14	-0.829	3.2	2.33	1.49	-0.703	-2.23			0.523	-0.126	-1.5	2	-2.38	3.42	0.105
-1.49	-0.0617	1.08	0.571	3	0.37	-2.81			0.406	-2.11	-0.123	2.04	-2.21	3.19	-1.42
-1.66	-0.512	1.4	2.63	2.47	-0.431	-2.68			-0.376	-0.654	-0.346	0.817	-1.74	2.02	-0.895
-2.82	-0.714	0.41	1	1.59	1.51	-2.81			0.162	-0.000568	0.72	0.761	-2.44	2.87	-0.854
-1.93	-1.2	4.44	1.01	2.08	0.753	-1.95			0.547	0.37	-0.14	1.12	-2.26	3.31	-0.833
-2.9	-0.0904	0.898	2.65	2.4	-0.181	-1.63			0.285	0.184	-1.83	-0.777	-1.47	3.34	-0.518
-2.99	0.402	0.478	2.37	2.28	1.29	-2.41			-0.0426	0.0249	0.0531	-3.03	-1.76	2.7	-0.803
-2.84	-0.686	2.37	1.8	1.26	0.691	-3.48			-0.0364	-0.803	0.632	-3.8	-1.58	3.52	-0.876
-2.85	0.261	2.71	2.11	1.72	-0.589	-3.01			-0.098	-1.45	0.238	-1.63	-1.04	3.01	-0.691
-3.77	0.383	2.73	1.91	1.53	-1.37	-2.59			0.122	-1.4	-0.189	-2.35	0.011	4.51	-0.62
-2.89	-0.578	4.01	-0.268	2.58	-0.344	-3.47			0.273	0.91	0.056	-1.5	-0.667	2.7	-0.323
-3.38	1.14	2.48	0.817	3.12	-0.156	-3.01			0.49	-0.355	0.00505	-1.55	-0.968	3.09	-0.581
-3.13	-0.404	3.17	1.13	2.28	0.112	-2.55			0.287	-0.634	1.13	0.81	-2.34	2.73	-0.441
-2.61	-0.192	3.54	1.33	2.77	-0.478	-3			0.0331	0.317	-1.84	0.0959	-2.49	2.23	-0.763
-1.75	-0.462	2.2	2.28	1.76	-1.14	-2.55			0.153	0.967	-0.815	0.428	-0.804	1.54	-0.735
-2.15	0.18	1.04	0.72	3.51	1.62	-3.42			0.335	0.189	-1.25	0.851	-0.26	1.38	-0.38
-2.16	-0.365	3.18	2.76	2.22	0.216	-3.37			0.3	0.785	1.5	0.958	-1.28	2.41	0.355
-2.26	-0.362	1.45	1.37	3.51	-0.816	-3.9			0.67	1.95	0.326	2.39	-1.41	3.02	0.864
-1.79	-0.195	2.71	2.7	2.44	1.23	-2.24			0.386	1.36	-1.72	2.63	-0.246	3.25	1.16
-1.3	-0.693	5.12	2.51	0.55	-0.451	-2.82			0.256	0.168	-2.12	3.11	-0.0291	4.05	0.881
-2.56	-0.284	3.21	1.72	0.871	-1.32	-2.94			0.561	-0.601	-0.547	3.39	0.816	3.64	0.214
-2.37	-0.147	3.36	2.14	2.7	1.89	-0.607			0.257	-0.487	0.158	3.99	0.774	2.82	-0.243
-2.75	-1.43	3.38	3.31	2.68	2.01	-2.11			-0.411	1.63	-1.32	3.97	0.334	3.73	0.21
-2.48	-0.59	1.62	2.41	2.31	0.882	-2.17			0.493	1.02	-0.966	4.52	1.26	3.5	0.24
-1.9	-0.358	1.5	2.93	2.31	2.27	-2.35			-0.0576	-0.824	-1.05	4.33	1.43	4.32	0.429
-2.2	-1.05	2.89	1.51	1.33	1.06	-2.29			-0.456	-1.43	-0.396	3.6	1.66	3.06	0.535
-3.18	-0.831	1.11	2.53	2.41	1.98	-1.54			0.248	-0.887	-0.234	1.74	2.08	3.25	0.611
-2.11	-0.561	2.22	3.27	3.34	0.348	-2.8			0.263	-0.879	-0.218	1.5	1.75	5.2	0.319
-2.77	0.258	1.5	2.1	2.66	-0.754	-2.16			0.379	0.464	-0.66	2.06	1.66	3.5	1.02
-4.77	-1.12	2.81	2.76	2.12	-1.05	-1.71			0.427	1.27	0.103	3.11	1.7	3.78	1.44
-4.35	-0.264	2.13	0.899	2.48	-1.71	-2.93			-0.158	1.16	-0.517	2.56	1.38	3.95	2.5
-4.58	-0.0748	3.81	2.36	2.03	-1.51	-4.11			0.113	1.84	0.186	2.4	0.936	3.15	2.38
-4.79	-1.57	3.57	1.75	3.01	-0.517	-3.48			0.313	0.0159	-1.84	2.39	0.0848	2.67	1.84
-5.49	0.414	3.24	1.65	4.72	-1.67	-3.08			-0.214	-0.685	-1.34	2.02	0.222	3.45	0.576
-4.01	-0.231	3.69	2.57	2.84	0.0738	-5.1			-0.182	0.256	-1.52	2.76	-0.698	2.67	0.213
-4.64	-1.5	2.43	3.28	2.27	0.521	-3.77			-0.534	1.31	-0.521	3.53	-0.471	2.84	1.16
-5.43	-0.291	3.3	2.34	2.17	-0.883	-2.05			-0.565	-0.352	-0.104	2.6	-0.773	2.69	-0.071
-4.23	-0.796	2.15	3.69	2.24	0.0894	-2.8			-1.01	-0.293	-0.275	3	-0.684	2.87	0.7
-4.49	-0.846	3.11	3.06	1.43	-0.0455	-1.97			-0.417	1.64	-1.36	2.06	-0.685	3.66	0.783
-4.08	0.753	1.27	3.78	1.13	-0.705	-3.5			0.0126	1.85	-1.56	0.0927	-0.163	3.36	-0.105
-4.77	1.1	1.63	2.63	1.47	0.466	-1.62			-0.775	0.485	-1.81	-0.372	-1.16	3	-0.775
-4.44	-0.176	4.08	0.609	1.37	-0.999	-2.51			-0.285	-0.559	-2.35	0.782	-0.94	5.09	-0.466
-3.83	-1.06	1.92	2.27	2.67	-1.85	-3.5			-0.555	0.313	-2.17	-0.376	-1.33	3.21	-0.446
-5.22	0.383	2.77	1.19	2.23	-1.89	-3.31			-0.7	0.0365	-1.16	-2.22	-1.04	3.31	0.151
-5.76	-0.607	1.58	2.77	0.709	0.97	-3.15			-0.608	0.297	-0.615	-2.92	-1.57	3.24	0.797
-4.91	-0.918	2.72	3.31	-0.105	0.483	-3.61			-0.821	0.128	-1.44	-2.04	-2.07	3.08	1.03
-3.56	-0.115	2.96	0.975	1.42	1.05	-4.35			-0.491	1.36	-0.363	-3.02	-2.43	3.08	1.18
-3.88	-0.206	3.34	3.07	2.16	1.3	-3.85			-0.47	1.07	-1.8	-3.7	-2.79	3.73	0.747
-4.4	-0.467	3.74	2.66	2.69	-0.857	-3.24			-0.0931	0.703	-1.8	-1.86	-2.88	3.87	1.08
-3.78	-0.0867	2.65	2.85	1.48	0.374	-3.35			0.528	0.673	-1.19	-1.38	-3.21	3.35	1.73
-3.18	-0.594	5.9	2.16	1.86	-0.597	-2.58			-0.368	1.25	-0.807	-1.86	-2.16	3.88	0.88
-3.62	-0.968	6.21	2.36	1.63	0.0418	-3.2			-1.39	0.453	-0.376	-1.47	-1.34	1.84	1.17
-3.05	-0.403	3.42	0.719	0.746	0.908	-3.69			-0.319	1.99	-1.87	-1.05	-1.43	2.43	1.47
