# Supplementary material for: Metabolic sensing in AgRP neurons integrates homeostatic state with dopamine signalling in the striatum
Source: eLife journal article supplement (doi:10.7554/elife.72668), 2022-01-12
Supplement: fig2-data1 [file Fig2O.xlsx]

## Sheet: Sheet1
	WT									KO
-20-0	1.63349	0.938266	1.40058	1.92125	0.557925					1.95943	0.538075	1.03779	0.667999	0.940882	-0.172846	0.390026
0-30	2.10002	4.75305	6.5983	5.50928	3.60092					3.25646	3.24751	2.07888	1.03728	-0.455524	-0.351131	0.391721
30-60	1.06703	2.27811	0.147861	1.37801	0.777521					0.014658	3.05537	0.722196	1.07546	-2.15613	-0.319359	-1.41137
