# Supplementary material for: Metabolic sensing in AgRP neurons integrates homeostatic state with dopamine signalling in the striatum
Source: eLife journal article supplement (doi:10.7554/elife.72668), 2022-01-12
Supplement: fig2-data1 [file Fig2P.xlsx]

## Sheet: Sheet1
	WT									KO
-20-0	1.7746	0.698402	0.855033	1.16086	1.1975	1.75346	0.126976			1.32818	0.437739	0.0239884	0.087286	0.281375	0.816596	0.336762
0-30	3.13866	1.11381	9.20466	4.25021	6.56162	5.95813	4.28451			2.04227	1.92066	2.68396	3.34385	2.15457	3.14072	3.03539
30-60	-0.175366	-0.113654	5.86367	2.09334	2.25408	1.58724	1.06365			0.804366	1.1567	-0.106172	1.24278	-0.603975	2.73962	0.223157
