# Supplementary material for: Metabolic sensing in AgRP neurons integrates homeostatic state with dopamine signalling in the striatum
Source: eLife journal article supplement (doi:10.7554/elife.72668), 2022-01-12
Supplement: fig2-data1 [file Fig2Q.xlsx]

## Sheet: Sheet1
	WT									KO
fed	8	11.502	16	8.109	11.9					8.298	16.7	26	10.3	24.001	7.988	12.299
fasted	34	4.297	24	19	17	15.298	25			26	21	14	18	15	22	18	24
