# Supplementary material for: Metabolic sensing in AgRP neurons integrates homeostatic state with dopamine signalling in the striatum
Source: eLife journal article supplement (doi:10.7554/elife.72668), 2022-01-12
Supplement: fig2-data1 [file Fig2R.xlsx]

## Sheet: Sheet1
	WT									KO
fed	11	5.699	8	6.901	15.4					6.501	3.195	7	6.202	5.399	2.111	28.203
fasted	7	11.103	4.405	5	4	7.498	10			12	6	20	3	3	7	5	5
