# Supplementary material for: Metabolic sensing in AgRP neurons integrates homeostatic state with dopamine signalling in the striatum
Source: eLife journal article supplement (doi:10.7554/elife.72668), 2022-01-12
Supplement: fig3-data1 [file elife-72668-fig3-data1-v2.zip]

## Sheet: Sheet1
WT										KO
0	0	0	0	0	0					0	0	0	0	0	0	0	0
0	0	0	0	0	0					0	0	0	0	0	0	0	0
0	0	0	0	0	0					0	0	0	0	0	0	0	0
0	0	0	0	0	0					0	0	0	0	0	0	0	0
0	0	0	0	0	0					0	0	0	0	0	0	1	0
0	0	0	0	0	0					0	0	0	0	0	0	1	0
0	2	0	0	0	0					0	0	0	0	0	0	1	0
0	2	0	0	0	0					0	0	0	0	0	0	1	0
0	2	0	0	0	0					0	0	0	0	0	0	1	0
0	2	0	0	0	0					0	0	0	0	0	0	1	0
0	2	0	0	0	0					0	0	0	0	0	0	2	0
0	2	0	0	0	0					0	0	0	0	0	0	2	0
0	2	0	0	0	0					0	0	0	0	0	0	2	0
0	4	0	0	0	1					0	0	0	0	0	0	2	0
0	4	0	0	0	2					0	0	0	0	0	0	2	0
0	4	0	0	0	2					0	1	0	0	0	0	2	0
0	4	0	0	0	2					0	2	0	0	0	0	2	0
0	4	1	0	0	2					0	2	0	0	0	0	2	0
0	4	2	0	0	2					0	2	0	0	0	0	2	0
0	4	2	0	0	2					0	2	0	0	0	0	2	0
0	4	2	0	0	2					0	2	0	0	0	0	2	0
0	4	2	0	0	2					0	2	0	0	0	0	2	0
0	4	2	0	0	2					0	2	0	0	0	0	2	0
0	4	4	0	0	2					0	4	0	0	0	0	2	0
0	4	4	0	0	2					0	4	0	0	0	0	2	0
0	4	4	0	0	2					0	4	0	0	0	0	2	0
0	4	4	0	0	2					1	4	0	0	0	0	2	0
0	4	4	0	0	2					2	4	0	0	0	0	2	0
0	4	4	0	0	2					2	4	0	0	0	0	2	0
0	4	4	0	0	2					2	4	0	0	0	0	2	0
0	4	4	0	0	2					2	4	0	0	0	0	2	0
0	4	4	0	0	2					2	4	0	0	0	0	2	0
0	8	4	0	0	2					2	4	0	0	0	0	4	0
0	8	4	0	0	2					2	4	0	0	0	0	4	0
0	8	4	0	0	2					2	4	0	0	0	0	4	0
0	8	4	0	0	2					2	4	0	0	0	0	4	0
0	8	4	0	0	2					2	4	0	0	0	0	4	0
0	8	4	0	0	2					2	4	0	0	0	0	4	0
0	8	4	0	0	2					2	4	0	0	0	0	4	0
0	8	4	0	0	2					2	4	0	0	0	0	4	0
0	8	4	0	0	2					2	4	0	0	0	0	4	0
0	8	4	0	0	2					2	4	0	0	0	0	8	0
0	8	4	0	0	2					2	4	0	0	0	0	8	0
0	8	4	0	0	2					2	4	0	0	0	0	8	0
0	8	4	0	0	2					2	4	0	0	0	0	8	0
0	8	4	0	0	2					2	4	0	0	0	0	8	0
0	8	4	0	0	2					2	4	0	0	0	0	8	0
0	8	4	0	0	2					2	4	0	0	0	0	8	0
0	8	4	0	0	2					2	4	0	0	0	0	8	0
0	8	4	0	0	2					2	4	0	0	0	0	8	0
0	8	4	0	0	2					2	4	0	0	0	0	8	0
0	8	4	0	0	2					2	4	0	0	0	0	8	0
0	8	4	0	0	2					2	4	0	0	0	0	8	0
0	8	4	0	0	2					2	4	1	1	0	0	8	0
0	8	4	0	0	2					2	4	1	1	1	0	8	0
0	8	4	0	0	2					2	4	1	2	1	1	8	0
0	8	4	1	1	2					2	4	1	2	2	2	8	0
1	14	4	1	2	2					2	4	2	2	4	2	8	0
1	14	4	1	2	2					2	4	4	2	4	4	8	0
1	14	4	1	2	2					2	4	4	2	4	4	8	0
1	14	4	1	2	2					2	4	4	4	4	4	8	0
1	14	4	1	2	2					2	4	4	4	4	4	8	0
2	14	4	1	4	2					2	4	4	4	4	8	8	0
2	14	4	2	4	2					2	4	4	4	4	8	8	0
2	14	4	2	4	2					2	4	4	4	4	8	8	0
2	14	4	2	4	2					2	4	4	4	4	8	8	0
2	14	4	2	4	2					2	4	4	4	4	8	8	0
2	14	4	2	4	2					2	4	4	4	4	8	8	0
2	14	4	2	4	2					2	4	4	4	4	8	8	0
2	14	4	2	4	2					2	4	4	4	4	8	8	0
2	14	4	2	4	2					2	4	4	4	4	8	8	0
2	14	4	2	4	2					2	4	4	4	4	8	8	0
2	14	4	4	4	2					2	4	4	4	4	8	8	0
2	14	4	4	4	2					2	4	4	4	4	8	8	0
2	14	4	4	4	2					2	4	4	4	4	8	8	0
2	14	4	4	4	2					2	4	4	4	4	8	8	0
2	14	4	4	4	2					2	4	4	4	4	8	8	0
2	14	4	4	4	4					2	4	4	4	4	8	8	0
2	14	4	4	4	4					2	4	4	4	4	8	8	0
2	14	4	4	4	8					2	4	4	4	4	14	8	0
2	14	4	4	4	8					2	4	4	4	4	14	8	0
2	14	4	4	4	8					2	4	4	4	4	14	8	0
2	23	4	4	4	8					4	4	4	4	4	14	8	0
2	23	4	4	4	8					4	4	4	4	4	14	8	0
2	23	4	4	4	8					4	4	4	4	4	14	8	0
2	23	4	4	4	8					4	4	4	4	4	14	8	0
2	23	4	4	4	8					4	4	4	4	4	14	8	0
2	23	4	4	4	8					4	4	4	4	4	14	8	0
4	23	4	4	4	8					4	4	4	4	4	14	8	0
4	23	4	4	4	8					4	4	4	4	4	14	8	0
4	23	4	4	4	8					4	4	4	4	4	14	8	0
4	35	4	4	4	8					4	4	4	4	14	14	8	0
4	35	4	4	4	8					4	4	4	4	14	14	8	0
4	35	4	4	4	8					4	4	4	4	23	14	8	0
4	35	4	4	4	8					4	4	4	4	23	14	8	0
4	35	4	4	4	8					4	4	4	8	23	14	14	0
4	35	4	4	4	8					4	4	4	14	23	14	14	0
4	35	4	4	8	8					4	4	8	14	23	14	14	0
4	35	4	4	8	14					4	4	14	14	23	14	14	0
4	35	4	4	8	14					4	4	14	14	23	14	14	0
4	35	8	4	8	14					4	4	14	14	23	14	14	0
4	35	8	4	8	14					4	4	14	14	23	14	14	0
4	35	8	4	8	14					4	4	14	14	23	14	14	0
4	50	8	4	8	14					4	4	14	14	23	14	14	0
4	50	8	4	8	14					4	4	14	14	23	14	14	0
4	50	8	4	8	14					4	4	14	14	23	14	14	0
4	50	8	4	8	14					4	4	14	14	23	14	14	0
4	50	8	4	8	14					4	4	14	14	23	14	14	0
4	50	8	4	8	14					4	4	14	14	23	14	14	0
4	50	8	4	8	14					8	4	14	14	23	14	14	0
4	50	8	4	8	14					8	4	14	14	23	14	14	0
4	50	8	4	8	14					8	4	14	14	23	14	14	0
4	50	8	4	8	14					8	4	14	14	23	14	14	0
4	50	8	4	8	14					8	8	14	14	23	14	14	0
4	50	8	4	8	14					8	8	14	14	23	14	14	0
4	50	8	4	8	14					8	8	14	14	23	14	14	0
4	50	8	4	8	14					8	8	14	14	23	14	14	0
4	50	8	4	8	14					8	8	14	14	23	14	14	0
4	50	8	14	14	14					8	8	14	14	23	14	14	0
4	50	8	14	14	14					8	8	14	14	23	14	14	0
4	50	8	14	14	14					8	8	14	14	23	14	14	0
4	50	8	14	14	14					8	8	14	14	23	14	14	0
4	50	8	14	14	23					8	8	14	14	23	14	14	0
4	50	8	14	14	23					8	8	14	14	23	14	14	0
4	50	14	14	14	23					8	8	14	14	23	14	14	0
4	50	23	14	14	23					8	8	14	14	23	23	14	0
4	50	23	14	14	23					8	8	14	14	35	23	14	0
4	50	23	14	14	23					8	8	14	14	50	23	14	0
4	50	23	14	14	23					8	8	14	14	50	23	14	0
4	50	23	14	14	23					8	8	14	14	50	23	14	0
4	50	23	14	14	23					8	8	23	14	50	23	23	0
8	50	23	14	14	23					8	8	23	14	50	23	23	0
8	50	23	14	14	23					8	8	23	14	50	23	23	0
8	70	23	14	14	23					8	8	23	14	50	23	23	0
8	70	23	14	14	23					8	8	23	14	50	23	23	0
8	70	23	14	23	23					8	8	23	14	50	23	23	0
8	70	23	14	23	23					8	8	23	14	50	35	23	0
8	70	23	14	23	23					8	8	23	14	50	35	23	0
8	70	23	14	23	23					8	8	23	14	50	35	23	0
8	70	23	14	23	23					8	8	23	14	50	35	23	0
14	70	23	14	23	23					8	8	23	14	50	35	23	0
14	70	23	23	23	23					8	8	23	14	50	35	23	0
14	70	23	23	23	23					8	8	23	14	50	35	23	0
14	70	23	23	23	23					8	8	23	14	50	35	23	0
14	70	23	23	23	23					8	8	23	23	50	35	23	0
14	70	23	23	23	23					8	8	23	23	50	35	23	0
14	70	23	23	23	23					8	8	23	23	50	35	23	0
14	70	23	23	23	23					8	14	23	23	50	35	23	0
14	70	23	23	23	35					8	14	23	23	50	35	23	0
14	70	23	23	23	35					8	14	23	23	50	35	23	0
14	70	23	23	23	35					8	14	23	23	50	35	23	0
14	70	23	23	23	35					8	14	23	23	50	35	23	0
14	70	23	23	23	35					8	14	23	23	50	50	35	0
14	70	23	23	23	35					8	14	23	23	50	50	35	0
23	70	23	35	23	35					8	14	23	35	70	50	35	0
23	70	23	35	23	35					8	14	35	35	70	50	35	0
23	95	23	35	35	35					8	23	35	35	70	50	35	0
23	95	23	35	35	35					14	23	35	35	70	50	35	0
23	95	23	35	35	35					14	23	35	35	70	50	35	0
23	95	23	35	35	35					14	23	35	35	70	50	35	0
23	95	23	35	35	35					14	23	35	35	70	50	35	0
23	95	23	35	35	35					14	23	35	35	70	50	35	0
23	95	23	35	35	35					14	23	35	35	70	50	35	0
23	95	23	35	35	35					14	23	35	35	70	50	35	0
23	95	23	35	35	35					14	23	35	35	70	50	35	0
23	95	23	50	35	50					14	23	35	35	70	50	35	0
23	95	23	50	35	50					14	23	35	35	70	50	35	0
23	95	23	50	35	50					14	23	35	35	70	50	35	0
35	95	23	50	35	50					14	23	35	35	70	70	50	0
35	95	23	50	35	50					14	23	35	35	95	70	50	0
35	95	23	50	35	50					14	23	35	50	95	70	50	0
35	95	23	50	35	50					14	23	35	50	95	70	50	0
35	95	23	50	35	50					14	23	35	50	95	70	50	0
35	95	23	50	35	50					14	23	35	50	95	70	50	0
35	95	23	50	35	50					14	23	35	50	95	70	50	0
35	95	23	50	35	50					14	23	35	50	95	70	50	0
35	95	23	50	35	50					14	23	35	50	95	70	50	0
35	95	35	50	35	50					14	23	35	50	95	70	50	0
35	95	35	50	35	50					14	23	35	50	95	70	50	0
35	95	50	50	50	50					23	23	35	50	95	70	50	0
35	95	50	50	50	50					23	23	35	50	95	70	50	0
50	95	50	50	50	50					23	23	35	50	95	70	50	0
50	95	50	70	50	50					23	23	50	50	95	70	50	0
50	127	50	70	50	50					23	35	50	50	95	70	50	0
50	127	50	70	50	50					23	35	50	50	95	95	50	0
50	127	50	70	50	50					23	35	50	50	95	95	50	0
50	127	50	70	50	50					23	35	50	50	95	95	50	0
50	127	50	70	50	50					23	35	50	50	95	95	50	0
50	127	50	70	50	50					23	35	50	50	127	95	70	0
50	127	50	70	50	50					23	35	50	50	127	95	70	0
50	127	50	70	50	50					23	35	50	50	127	95	70	0
50	127	50	95	50	50					23	35	50	50	127	95	70	0
50	127	50	95	50	50					23	35	50	50	127	95	70	0
50	127	50	95	50	50					23	35	50	50	127	95	70	0
50	127	50	95	50	50					23	35	50	70	127	95	70	0
70	127	50	95	50	50					23	50	50	70	127	95	70	0
70	127	50	95	50	50					23	50	50	70	127	95	70	0
70	127	50	95	50	50					23	50	50	70	127	95	70	0
70	167	50	95	50	50					23	50	50	70	127	95	70	0
70	167	50	95	50	70					23	50	50	70	127	127	70	0
70	167	50	95	50	70					23	50	50	70	127	127	70	0
70	167	50	95	50	70					23	50	70	70	127	127	70	0
70	167	50	95	50	70					23	50	70	70	127	127	70	0
70	167	50	95	50	70					23	50	70	70	127	127	70	0
70	167	50	95	70	70					23	50	70	70	127	127	70	0
70	167	50	95	70	70					35	50	70	70	127	127	70	0
70	167	50	95	70	70					35	50	70	70	127	127	70	0
70	167	50	95	70	70					35	50	70	70	127	127	70	0
70	167	50	127	70	70					35	50	70	70	167	127	70	0
70	167	50	127	70	70					35	50	70	70	167	127	70	0
70	167	50	127	70	70					35	50	70	70	167	127	95	0
95	167	50	127	70	70					35	50	70	70	167	127	95	0
95	167	50	127	70	70					35	50	70	95	167	127	95	0
95	167	50	127	70	70					35	50	70	95	167	127	95	0
95	167	50	127	70	70					35	70	70	95	167	127	95	0
95	167	50	127	70	70					35	70	70	95	167	127	95	0
95	167	50	127	70	70					35	70	70	95	167	127	95	0
95	167	50	127	70	70					35	70	70	95	167	127	95	0
95	167	50	127	70	70					35	70	70	95	167	127	95	0
95	167	50	127	70	70					35	70	70	95	167	167	95	0
95	167	50	127	70	70					35	70	70	95	167	167	95	0
95	167	50	127	70	70					35	70	70	95	167	167	95	0
95	167	50	167	70	70					35	70	70	95	167	167	95	0
95	167	50	167	70	70					35	70	70	95	167	167	95	0
95	167	50	167	70	70					35	70	95	95	167	167	95	1
95	167	50	167	70	70					35	70	95	95	167	167	95	1
95	167	50	167	70	70					35	70	95	95	167	167	95	2
95	167	50	167	70	70					35	70	95	95	167	167	95	2
95	167	50	167	70	70					35	70	95	95	167	167	95	2
127	167	50	167	70	70					35	70	95	95	167	167	95	2
127	167	50	167	70	70					35	70	95	95	167	167	95	2
127	167	50	167	70	70					35	70	95	95	167	167	95	2
127	167	50	167	70	70					35	70	95	95	167	167	95	4
127	167	50	167	70	70					35	70	95	95	167	167	95	4
127	167	50	167	70	70					50	70	95	127	167	167	95	4
127	167	50	167	70	70					50	70	95	127	167	167	95	4
127	167	50	167	70	70					50	70	95	127	167	167	95	4
127	167	50	167	70	70					50	70	95	127	167	167	95	4
127	167	50	167	70	70					50	70	95	127	167	167	95	4
127	167	50	167	70	70					50	70	95	127	167	167	95	4
127	167	50	167	70	70					50	95	95	127	167	167	95	4
127	167	50	167	70	70					50	95	95	127	167	167	95	4
127	167	50	167	70	70					50	95	95	127	167	167	95	8
127	167	50	167	70	70					50	95	95	127	167	167	95	8
127	167	50	167	70	70					50	95	95	127	167	167	95	8
127	167	50	167	70	70					50	95	95	127	167	167	95	8
127	167	50	167	70	70					50	95	95	127	167	167	95	8
167	167	50	167	70	70					50	95	95	127	167	167	95	8
167	167	50	167	70	70					50	95	95	127	167	167	95	8
167	167	50	167	70	70					50	95	95	127	167	167	127	8
167	167	50	167	95	70					50	95	95	127	167	217	127	8
167	167	50	167	95	70					70	95	95	127	167	217	127	8
167	167	50	167	95	70					70	95	95	127	167	217	127	8
167	167	50	167	95	95					70	95	95	127	167	217	127	8
167	167	50	167	95	95					70	95	95	127	167	217	127	8
167	167	50	217	95	95					70	95	95	127	167	217	127	14
167	217	50	217	95	95					70	95	95	127	167	217	127	14
167	217	50	217	95	95					70	95	127	127	167	217	127	14
167	217	50	217	95	95					70	95	127	127	167	217	127	14
167	217	70	217	95	95					70	95	127	127	167	217	127	14
167	217	70	217	95	95					70	95	127	127	167	217	167	23
167	217	70	217	95	95					70	95	127	127	167	217	167	23
167	217	70	217	95	95					70	95	127	127	167	217	167	23
167	217	70	217	95	95					70	95	127	127	167	217	167	23
167	217	70	217	95	95					70	127	127	127	167	217	167	23
167	217	70	217	95	95					70	127	127	127	167	217	167	23
167	217	70	217	95	95					70	127	127	127	167	217	167	23
217	217	70	217	95	95					70	127	127	127	167	217	167	23
217	217	70	217	95	95					70	127	127	127	167	217	167	23
217	217	70	217	95	95					70	127	127	127	167	217	167	23
217	217	70	217	95	95					70	127	127	127	167	217	167	23
217	217	70	217	95	95					70	127	127	127	167	217	167	23
217	217	70	217	95	95					70	127	127	127	167	217	167	23
217	217	70	217	95	95					70	127	127	127	167	217	167	23
217	217	70	217	95	95					70	127	127	127	167	217	167	23
217	217	70	217	95	95					70	127	127	127	167	217	167	23
217	217	70	217	95	95					70	127	127	167	167	217	167	23
217	217	70	217	95	95					70	127	127	167	167	217	167	23
217	217	70	217	95	95					70	127	127	167	167	217	167	35
217	217	70	217	95	95					70	127	127	167	167	217	167	35
217	217	70	217	95	95					70	127	127	167	167	217	167	35
217	217	70	217	95	95					70	127	167	167	167	279	167	35
217	217	70	217	95	95					70	127	167	167	167	279	167	35
217	217	70	217	95	95					70	127	167	167	167	279	167	35
217	217	70	217	95	95					70	127	167	167	167	279	167	35
217	217	70	217	95	95					70	127	167	167	167	279	167	50
217	217	70	217	95	95					95	127	167	167	167	279	167	50
217	217	70	217	95	95					95	127	167	167	167	279	167	50
217	217	70	217	95	95					95	127	167	167	217	279	167	50
217	217	70	279	95	95					95	127	167	167	217	279	167	50
217	279	70	279	95	95					95	127	167	167	217	279	167	50
217	279	70	279	95	95					95	167	167	167	217	279	167	50
279	279	70	279	95	95					95	167	167	167	217	279	167	50
279	279	70	279	95	95					95	167	167	167	217	279	167	50
279	279	70	279	95	95					95	167	167	167	217	279	167	50
279	279	70	279	95	95					95	167	167	167	217	279	167	50
279	279	70	279	95	95					95	167	167	167	217	279	167	50
279	279	70	279	95	95					95	167	167	167	217	279	167	50
279	279	70	279	95	127					95	167	167	167	217	279	167	50
279	279	70	279	95	127					95	167	167	167	217	279	167	50
279	279	70	279	95	127					95	167	167	167	217	279	167	50
279	279	70	279	95	127					95	167	167	167	217	279	167	50
279	279	95	279	95	127					95	167	167	167	217	279	167	50
279	279	95	279	95	127					95	167	167	167	217	279	167	70
279	279	95	279	95	127					95	167	167	167	217	279	167	95
279	279	95	279	95	127					95	167	167	167	217	279	167	95
279	279	95	279	95	127					95	167	167	167	217	279	167	95
279	279	95	279	95	127					127	167	167	167	217	279	167	95
279	279	95	279	95	127					127	167	167	167	217	279	167	95
279	279	95	279	95	127					127	167	217	167	217	279	167	95
279	279	95	279	95	127					127	167	217	167	217	279	167	95
279	279	95	279	95	127					127	167	217	167	217	279	167	95
279	279	95	279	95	127					127	167	217	167	217	279	167	95
279	279	95	279	95	127					127	167	217	167	217	279	167	95
279	279	95	279	95	127					127	167	217	167	217	279	167	95
279	279	95	279	95	127					127	167	217	167	217	279	167	95
279	279	95	279	95	127					127	167	217	167	217	279	167	95
279	279	95	279	95	127					127	167	217	167	217	279	167	95
279	279	95	279	95	127					127	167	217	167	217	279	167	95
356	279	95	279	95	127					127	167	217	167	217	279	167	95
356	279	95	279	95	127					127	167	217	167	217	279	167	127
356	279	95	279	95	127					127	167	217	167	217	279	167	127
356	279	95	279	95	127					127	167	217	167	217	279	167	127
356	279	95	279	95	127					127	167	217	167	217	356	167	127
356	279	95	279	95	127					127	167	217	167	217	356	167	127
356	279	95	279	95	127					127	167	217	167	217	356	167	127
356	279	95	279	95	127					127	217	217	167	217	356	167	127
356	279	95	279	95	127					127	217	217	167	217	356	167	127
356	279	95	279	95	127					127	217	217	167	217	356	167	127
356	279	127	279	95	127					127	217	217	167	217	356	167	127
356	279	127	279	95	127					127	217	217	167	217	356	167	167
356	279	127	279	95	127					127	217	217	167	217	356	167	167
356	279	127	279	95	167					127	217	217	167	217	356	167	167
356	279	127	279	95	167					127	217	217	167	217	356	167	167
356	279	127	279	95	167					127	217	217	167	217	356	167	167
356	279	127	279	95	167					127	217	217	167	217	356	167	167
356	279	127	279	95	167					127	217	217	167	217	356	167	167
356	279	127	279	95	167					127	217	217	167	217	356	167	167
356	279	127	279	95	167					127	217	217	167	217	356	167	167
356	279	127	279	95	167					127	217	217	167	217	356	167	167
356	279	127	279	95	167					127	217	217	167	217	356	167	167
356	279	127	279	95	167					127	217	217	167	217	356	167	167
356	279	127	279	95	167					127	217	217	167	217	356	167	167
356	279	127	279	95	167					127	217	217	167	217	356	167	167
356	279	127	279	95	167					127	217	217	167	217	356	167	167
356	279	127	279	95	217					127	217	279	167	217	356	167	167
356	279	127	279	95	217					127	217	279	167	217	356	167	167
356	279	127	279	95	217					127	217	279	167	217	356	167	167
356	356	127	279	95	217					127	217	279	167	279	356	167	167
451	356	167	279	95	217					127	217	279	167	279	356	167	167
451	356	167	279	95	217					127	217	279	167	279	356	167	167
451	356	167	279	95	217					127	217	279	167	279	356	167	167
451	356	167	279	95	217					127	217	279	167	279	356	167	217
451	356	167	279	95	217					127	217	279	167	279	356	167	217
451	356	167	279	95	279					127	217	279	167	279	356	217	217
451	356	167	279	95	279					127	217	279	167	279	356	217	217
451	356	167	279	95	279					127	217	279	167	279	356	217	217
451	356	167	279	95	279					127	217	279	167	279	356	217	217
451	356	167	279	95	279					127	217	279	167	279	356	217	217
451	356	167	279	95	279					127	217	279	167	279	356	217	217
451	356	167	279	95	279					127	217	279	167	356	356	217	217
451	356	167	279	95	279					127	217	279	167	356	356	217	217
451	356	167	356	95	279					127	217	279	167	356	356	217	217
451	356	167	356	95	279					127	217	279	167	356	356	217	217
451	356	167	356	95	279					127	279	279	167	356	356	217	217
451	356	167	356	95	279					127	279	279	167	356	356	217	217
451	356	167	356	95	279					127	279	279	167	356	356	217	217
451	356	167	356	95	279					127	279	279	217	356	356	217	217
451	356	167	356	95	279					127	279	279	217	356	356	217	217
451	356	167	356	95	279					127	279	279	217	356	356	217	217
451	356	167	356	95	279					127	279	279	217	356	356	217	217
451	356	167	356	95	279					127	279	279	217	356	356	217	217
451	356	167	356	95	279					127	279	279	217	356	356	217	279
451	356	167	356	95	279					127	279	279	217	356	356	217	279
451	356	167	356	95	279					127	279	279	217	356	356	217	279
451	356	167	356	95	279					127	279	279	217	451	356	217	279
451	356	217	356	95	279					127	279	279	217	451	356	217	279
451	356	217	356	95	279					127	279	279	217	451	356	217	279
451	356	217	356	95	279					127	279	279	217	451	356	217	279
451	356	217	356	95	279					127	279	279	217	451	356	217	279
451	356	217	356	95	279					127	279	279	217	451	356	217	279
451	356	217	356	95	279					127	279	279	217	451	356	217	279
451	356	217	356	95	279					127	279	356	217	451	356	217	279
569	356	217	356	95	279					127	279	356	217	451	356	217	279
569	356	217	356	95	279					127	279	356	217	451	356	217	279
569	356	217	356	95	279					127	279	356	217	451	356	217	279
569	356	217	356	95	279					127	279	356	217	451	356	279	279
569	356	217	356	95	279					127	279	356	217	451	356	279	279
569	356	217	356	95	279					127	279	356	217	451	356	279	279
569	356	217	356	95	279					127	279	356	217	451	356	279	279
569	356	217	356	95	279					127	279	356	217	451	356	279	279
569	356	217	356	95	279					127	279	356	217	451	356	279	279
569	356	217	356	95	279					127	279	356	217	451	356	279	279
569	356	279	356	95	279					127	279	356	217	451	356	279	279
569	356	279	356	95	279					127	279	356	217	451	356	279	279
569	356	279	356	95	279					127	279	356	217	451	356	279	279
569	356	279	356	95	279					127	279	356	217	451	356	279	279
569	356	279	356	95	279					127	279	356	217	451	356	279	279
569	356	279	356	95	279					127	279	356	217	569	356	279	279
569	356	279	356	127	356					127	279	356	217	569	356	279	279
569	356	279	356	127	356					127	356	356	217	569	356	279	279
569	356	279	356	127	356					127	356	356	217	569	356	279	279
569	356	279	356	127	356					127	356	356	217	569	356	279	279
569	356	279	356	127	356					127	356	356	279	569	356	279	279
569	356	279	356	127	356					127	356	356	279	569	356	279	279
569	356	279	356	127	356					127	356	356	279	569	356	279	279
569	356	279	356	127	356					127	356	356	279	569	356	279	279
569	356	279	356	127	356					127	356	356	279	569	356	279	279
569	356	279	356	127	356					127	356	356	279	569	356	279	279
569	356	279	356	127	356					127	356	356	279	569	356	279	279
569	356	279	356	127	356					167	356	356	279	569	356	279	279
569	356	279	356	127	356					167	356	356	279	569	356	279	279
569	356	279	356	127	356					167	356	356	279	569	356	279	279
569	356	279	356	127	356					167	356	356	279	569	356	279	279
569	356	279	356	127	356					167	356	356	279	569	356	279	279
569	356	279	356	127	356					167	356	356	279	569	356	279	279
569	356	279	356	127	356					167	356	356	279	569	356	279	279
569	356	279	356	127	356					167	356	356	279	569	356	279	279
569	356	279	356	127	356					167	356	356	279	569	356	279	279
569	356	279	356	127	356					167	356	356	279	569	356	279	279
569	356	279	356	127	356					167	356	356	279	569	356	279	279
569	356	279	451	127	356					167	356	356	279	569	356	279	356
569	356	279	451	127	356					167	356	356	279	569	356	279	356
569	356	279	451	127	356					167	356	356	279	569	356	279	356
714	451	279	451	127	356					167	356	356	279	569	356	279	356
714	451	279	451	127	356					167	356	356	279	569	356	279	356
714	451	279	451	127	356					167	356	356	356	569	356	279	356
714	451	279	451	127	356					167	356	356	356	569	356	279	356
714	451	279	451	127	356					167	356	356	356	569	356	279	356
714	451	279	451	127	356					167	356	356	356	569	356	279	356
714	451	279	451	127	356					167	356	356	356	569	356	279	356
714	451	279	451	127	356					167	356	356	356	569	356	279	356
714	451	279	451	127	356					167	356	356	356	569	356	279	356
714	451	279	451	127	356					167	356	356	356	569	356	279	356
714	451	279	451	127	356					167	356	356	356	569	356	279	356
714	451	279	451	127	356					167	356	356	356	569	356	279	356
714	451	279	451	127	356					167	356	356	356	569	356	279	356
714	451	279	451	127	356					167	356	356	356	569	356	279	356
714	451	356	451	127	451					167	356	356	356	569	356	356	356
714	451	356	451	127	451					167	356	356	356	569	356	356	356
714	451	356	451	127	451					167	356	356	356	569	356	356	356
714	451	356	451	127	451					167	356	356	356	569	356	356	356
714	451	356	451	127	451					167	356	356	356	569	356	356	356
714	451	356	569	127	451					167	356	356	356	569	356	356	356
714	451	356	569	127	451					167	356	356	356	569	356	356	356
714	451	356	569	127	451					167	356	356	356	569	356	356	356
714	451	356	569	127	451					167	356	356	356	569	356	356	356
714	451	356	569	127	451					167	356	356	356	569	356	356	356
714	451	356	569	127	451					167	356	356	356	569	356	356	356
714	451	356	569	127	451					167	356	356	356	569	356	356	356
714	451	356	569	127	451					167	356	356	356	569	356	356	356
714	451	356	569	127	451					167	356	356	356	569	356	356	356
714	451	356	569	127	451					167	356	356	356	569	356	356	356
714	451	356	569	127	451					167	356	356	356	569	356	356	356
714	451	356	569	127	451					167	356	356	356	569	356	356	356
714	451	356	714	127	451					167	356	356	356	569	356	356	356
714	451	356	714	127	451					167	356	356	356	569	356	356	356
714	451	356	714	127	451					167	356	356	356	569	356	356	356
714	451	356	714	127	451					167	356	356	356	569	356	356	356
714	451	356	714	127	451					167	356	356	356	569	356	356	356
714	451	356	714	127	451					167	356	356	356	569	356	356	356
714	451	356	714	127	451					167	356	356	356	569	356	356	356
714	451	356	714	127	451					167	356	356	356	569	356	356	356
714	451	356	714	127	451					167	356	356	356	569	356	356	356
714	451	356	714	127	451					167	356	356	356	569	356	356	356
714	451	356	714	127	451					167	356	356	356	569	356	356	356
714	451	356	714	127	451					167	356	356	356	569	356	356	356
714	451	356	714	127	451					167	356	356	356	569	356	356	356
714	451	451	714	127	451					167	356	356	356	569	356	356	356
714	569	451	714	127	451					167	356	356	356	569	356	356	356
714	569	451	714	127	451					167	356	356	356	569	356	356	451
714	569	451	714	127	451					167	356	356	356	569	356	356	451
714	569	451	892	167	569					167	356	356	356	569	356	356	451
714	569	451	892	167	569					167	356	356	356	569	356	356	451
714	569	451	892	167	569					167	356	356	356	569	356	356	451
714	569	451	892	167	569					167	356	356	356	569	356	356	451
714	569	451	892	167	569					167	356	356	356	569	356	356	451
714	569	451	892	167	569					167	356	356	356	569	356	356	451
714	569	451	892	167	569					167	356	356	356	569	356	356	451
714	569	451	892	167	569					167	356	356	356	569	356	356	451
714	569	451	892	167	569					167	356	356	356	569	356	356	451
714	569	451	892	167	569					167	356	356	356	569	356	356	451
714	569	451	892	167	569					167	356	356	356	569	356	356	451
714	569	451	892	167	569					167	356	356	356	569	356	356	451
714	569	451	892	167	569					167	356	356	356	569	356	356	451
714	569	451	892	167	569					167	356	356	356	569	356	356	451
714	569	451	892	167	569					167	356	356	356	569	356	356	451
714	569	451	1111	167	569					167	356	356	356	569	356	356	451
714	569	451	1111	167	569					167	356	356	451	569	356	356	451
714	569	451	1111	167	569					167	356	356	451	569	356	356	451
892	569	451	1111	167	569					167	356	356	451	569	356	356	451
892	569	569	1111	167	569					167	356	356	451	569	356	356	451
892	569	569	1111	167	569					167	356	356	451	569	356	356	451
892	569	569	1111	167	569					167	356	356	451	569	356	356	451
892	569	569	1111	217	569					167	356	356	451	569	356	356	451
892	569	569	1111	217	569					167	356	356	451	569	356	451	451
892	569	569	1111	217	569					167	356	356	451	569	356	451	451
892	569	569	1111	217	569					167	356	356	451	569	356	451	451
892	569	569	1111	217	569					167	356	356	451	569	356	451	451
892	569	569	1111	217	569					167	356	356	451	569	356	451	451
892	569	569	1111	217	569					167	356	356	451	569	356	451	451
892	569	569	1111	217	569					167	356	356	451	569	356	451	451
892	569	569	1111	217	569					167	356	356	451	569	356	451	451
892	569	569	1111	217	569					167	356	356	451	569	356	451	451
892	569	569	1111	217	569					167	356	356	451	569	356	451	451
892	714	569	1111	217	569					167	356	356	451	569	356	451	451
892	714	569	1111	217	569					167	356	356	451	569	356	451	451
892	714	569	1111	217	569					167	356	356	451	569	356	451	451
892	714	569	1111	217	569					167	356	356	451	569	356	451	451
892	714	569	1111	217	569					167	356	356	451	569	356	451	451
892	714	569	1111	217	714					167	356	356	451	569	356	451	451
892	714	569	1111	217	714					167	356	356	451	569	356	451	451
892	714	569	1111	217	714					167	356	356	451	569	356	451	451
892	714	569	1111	217	714					167	356	356	451	569	356	451	451
892	714	569	1111	217	714					167	356	356	451	569	356	451	569
892	714	569	1111	217	714					167	451	356	451	569	356	451	569
892	714	569	1111	217	714					167	451	356	451	569	356	451	569
892	714	569	1111	217	714					167	451	356	451	569	356	451	569
892	714	569	1111	217	714					167	451	356	451	569	356	451	569
892	714	569	1111	217	714					167	451	356	451	569	356	451	569
892	714	569	1111	217	714					167	451	356	451	569	356	451	569
892	714	569	1111	217	714					167	451	356	451	569	356	451	569
892	714	569	1111	217	714					167	451	356	451	569	356	451	569
892	714	569	1111	217	714					167	451	356	451	569	356	451	569
892	714	569	1111	217	714					217	451	356	451	569	356	451	569
892	714	569	1111	217	714					217	451	356	451	569	356	451	569
892	714	569	1111	217	714					217	451	356	451	569	356	451	569
892	714	569	1111	217	714					217	451	356	451	569	356	451	569
892	714	569	1111	217	714					217	451	356	451	569	356	451	569
892	714	569	1111	217	714					217	451	356	451	569	356	451	569
892	714	569	1111	217	714					217	451	356	451	569	356	451	569
892	714	569	1111	279	714					217	451	356	451	569	356	451	569
892	714	569	1111	279	714					217	451	356	451	569	356	451	569
892	714	569	1111	279	714					217	451	356	451	569	356	451	569
892	714	569	1111	279	714					217	451	356	451	569	356	451	569
892	714	569	1111	279	714					217	451	356	451	569	356	451	569
892	892	569	1111	279	714					217	451	356	451	569	356	451	569
892	892	569	1111	279	714					217	451	356	451	569	356	451	569
892	892	569	1111	279	714					217	451	356	451	569	356	451	569
892	892	569	1111	279	714					217	451	356	451	569	356	451	569
892	892	569	1111	279	714					217	451	356	451	569	356	451	569
892	892	569	1111	279	714					217	451	356	451	569	356	451	569
892	892	569	1111	279	714					217	451	356	451	569	356	451	569
892	892	569	1111	279	714					217	451	356	451	569	356	451	569
892	892	569	1111	279	714					217	451	356	451	569	356	451	569
892	892	569	1111	279	714					217	451	356	451	569	356	451	569
892	892	569	1111	279	714					217	451	356	451	569	356	451	569
892	892	569	1111	279	714					217	451	356	451	569	356	451	569
892	892	569	1111	279	892					217	451	356	451	569	356	451	569
892	892	569	1111	279	892					217	451	356	451	569	356	451	569
892	892	569	1111	279	892					217	451	356	451	569	356	451	569
892	892	569	1111	279	892					217	451	356	451	569	356	451	569
892	892	569	1111	279	892					217	451	356	451	569	356	451	569
892	892	569	1111	279	892					217	451	356	451	569	356	451	569
892	892	569	1111	279	892					217	451	356	451	569	356	451	569
892	892	569	1111	279	892					217	451	356	451	714	356	451	569
892	892	569	1111	279	892					217	451	356	451	714	356	451	569
892	892	569	1111	279	892					217	451	356	451	714	356	451	569
892	892	569	1111	279	892					217	451	356	451	714	356	451	569
892	892	569	1111	279	892					217	451	356	451	714	356	451	569
892	892	569	1111	279	892					217	451	356	451	714	356	451	569
892	892	569	1111	279	892					217	451	356	451	714	356	451	569
892	892	569	1111	279	892					217	451	356	451	714	356	451	569
892	892	569	1111	279	892					217	451	356	451	714	356	451	569
892	892	569	1111	279	892					217	451	356	451	714	356	451	569
892	892	569	1111	279	892					217	451	356	451	714	356	451	569
892	1111	569	1111	279	892					217	451	356	451	714	356	451	569
892	1111	569	1111	279	892					217	451	356	451	714	356	451	569
892	1111	569	1111	279	892					217	451	356	451	714	356	451	569
892	1111	569	1111	279	892					217	451	356	451	714	356	451	569
892	1111	569	1111	279	892					217	451	356	451	714	356	451	569
892	1111	569	1111	356	892					217	451	356	451	714	356	451	569
892	1111	569	1111	356	892					217	451	356	451	714	356	451	569
892	1111	569	1111	356	892					217	451	356	451	714	356	451	569
892	1111	569	1111	356	892					217	451	356	451	714	356	451	569
892	1111	569	1111	356	892					217	451	356	451	714	356	451	714
892	1111	569	1111	356	892					217	451	356	451	714	356	451	714
892	1111	569	1111	356	892					217	451	356	451	714	356	451	714
892	1111	569	1111	356	892					217	451	356	451	714	356	451	714
892	1111	569	1111	356	892					217	451	356	451	714	356	451	714
892	1111	569	1111	356	892					217	451	356	451	714	356	451	714
892	1111	569	1111	356	892					217	451	356	451	714	356	451	714
892	1111	569	1111	356	892					217	451	356	451	714	356	451	714
892	1111	569	1111	356	892					217	451	356	451	714	356	451	714
892	1111	569	1111	356	892					217	451	356	451	714	356	451	714
892	1111	569	1111	356	892					217	451	356	451	714	356	451	714
892	1111	569	1111	356	892					217	451	356	451	714	356	451	714
892	1111	569	1111	356	892					217	451	356	451	714	356	451	714
892	1111	569	1111	356	892					217	451	356	451	714	356	451	714
892	1111	569	1111	356	892					217	451	356	451	714	356	451	714
892	1111	569	1111	356	892					217	451	356	451	714	356	451	714
892	1111	569	1111	356	892					217	451	356	451	714	356	451	714
892	1111	569	1111	356	892					217	451	356	451	714	356	451	714
892	1111	569	1111	356	892					217	451	356	451	714	356	569	714
892	1111	569	1111	356	892					217	451	356	451	714	356	569	714
892	1111	569	1111	356	892					217	451	356	451	714	356	569	714
892	1111	569	1111	356	892					217	451	356	451	714	356	569	714
892	1111	569	1111	356	892					217	451	356	451	714	356	569	714
892	1111	569	1111	356	892					217	451	356	451	714	356	569	714
892	1111	569	1111	356	892					217	451	356	451	714	356	569	714
892	1111	569	1111	356	892					217	451	356	451	714	356	569	714
892	1111	569	1111	356	892					217	451	356	451	714	356	569	714
892	1111	569	1111	356	892					217	451	356	451	714	356	569	714
892	1111	569	1111	356	892					217	451	356	451	714	356	569	714
892	1111	569	1111	356	892					217	451	356	451	714	356	569	714
892	1111	569	1111	356	892					217	451	356	451	714	356	569	714
892	1111	569	1111	356	892					217	451	356	451	714	356	569	714
892	1111	569	1111	356	892					217	451	356	451	714	356	569	714
892	1111	714	1111	356	892					217	451	356	451	714	356	569	714
892	1111	714	1111	356	892					217	451	356	451	714	356	569	714
892	1111	714	1111	356	892					217	451	356	451	714	356	569	714
892	1111	714	1111	356	892					217	451	356	451	714	356	569	714
892	1111	714	1111	356	892					217	451	356	451	714	356	569	714
892	1111	714	1111	356	892					217	451	356	451	714	356	569	714
892	1111	714	1111	356	892					217	451	356	451	714	356	569	714
892	1111	714	1111	356	892					217	451	356	451	714	356	569	714
892	1111	714	1111	356	892					217	451	356	451	714	356	569	892
892	1111	714	1111	356	892					217	451	356	451	714	356	569	892
892	1111	714	1111	356	892					217	451	356	451	714	356	569	892
892	1111	714	1111	356	892					217	451	356	451	714	356	569	892
892	1111	714	1111	356	1111					217	451	356	451	714	356	569	892
892	1111	714	1111	356	1111					217	451	356	451	714	356	569	892
892	1111	714	1111	356	1111					217	451	356	451	714	356	569	892
892	1111	714	1111	356	1111					217	451	356	451	714	356	569	892
892	1111	714	1111	356	1111					217	451	356	451	714	356	569	892
892	1111	714	1111	356	1111					217	451	356	451	714	356	569	892
892	1111	714	1111	356	1111					217	451	356	451	714	356	569	892
892	1111	714	1111	356	1111					217	451	356	569	714	356	569	892
892	1111	714	1111	356	1111					217	451	356	569	714	356	569	892
892	1111	714	1111	356	1111					217	451	356	569	892	356	569	892
892	1111	714	1111	356	1111					217	451	356	569	892	356	569	892
892	1111	714	1111	356	1111					217	451	356	569	892	356	569	892
892	1111	714	1111	356	1111					217	451	356	569	892	356	569	892
892	1111	714	1111	356	1111					217	451	356	569	892	356	569	892
892	1111	714	1111	356	1111					217	451	356	569	892	356	569	892
892	1111	714	1111	356	1111					217	451	356	569	892	356	569	892
892	1111	714	1111	356	1111					217	451	356	569	892	356	569	892
892	1111	714	1111	356	1111					217	451	356	569	892	356	569	892
892	1111	714	1111	356	1111					217	451	356	569	892	356	569	892
892	1111	892	1111	356	1111					217	451	356	569	892	356	569	892
892	1111	892	1111	356	1111					217	451	356	569	892	356	569	892
892	1111	892	1111	356	1111					217	451	356	569	892	356	569	892
1111	1111	892	1111	356	1111					217	451	356	569	892	356	569	892
1111	1111	892	1111	356	1111					217	451	356	569	892	356	569	892
1111	1111	892	1111	356	1111					217	451	356	569	892	356	569	892
1111	1111	892	1111	356	1111					217	451	356	569	892	356	569	892
1111	1111	892	1111	356	1111					217	451	356	569	892	356	569	892
1111	1111	892	1111	356	1111					217	451	356	569	892	356	569	892
1111	1111	892	1111	356	1111					217	451	356	569	892	356	569	892
1111	1111	892	1111	356	1111					217	451	356	569	892	356	569	892
1111	1111	892	1111	356	1111					217	451	356	569	892	356	569	892
1111	1111	892	1111	356	1111					217	451	356	569	892	356	569	892
1111	1111	892	1111	356	1111					217	451	356	569	892	356	569	892
1111	1111	892	1111	356	1111					217	451	356	569	892	356	569	892
1111	1111	892	1111	356	1111					217	451	356	569	892	356	569	892
1111	1111	892	1111	356	1111					217	451	356	569	892	356	569	892
1111	1111	892	1111	356	1111					217	451	356	569	892	356	569	892
1111	1111	892	1111	356	1111					217	451	356	569	892	356	569	892
1111	1111	892	1111	356	1111					217	451	356	569	892	356	569	892
1111	1111	892	1111	356	1111					217	451	356	569	892	356	569	892
1111	1111	892	1111	356	1111					217	451	356	569	892	356	569	892
1111	1111	892	1111	356	1111					217	569	356	569	892	356	569	892
1111	1111	892	1111	356	1111					217	569	356	569	892	356	569	892
1111	1111	892	1111	356	1111					217	569	356	569	892	356	569	892
1111	1111	892	1111	356	1111					217	569	356	569	892	356	569	892
1111	1111	892	1111	356	1111					217	569	356	569	892	356	569	892
1111	1111	892	1111	356	1111					217	569	356	569	892	356	569	892
1111	1111	892	1111	356	1111					217	569	356	569	892	356	569	892
1111	1111	892	1111	356	1111					217	569	356	569	892	356	569	892
1111	1111	892	1111	356	1111					217	569	356	569	892	356	569	892
1111	1111	892	1111	356	1111					217	569	356	569	892	356	569	892
1111	1111	892	1111	356	1111					217	569	356	569	892	356	569	892
1111	1111	892	1111	356	1111					217	569	356	569	892	356	569	892
1111	1111	892	1111	356	1111					217	569	356	569	892	356	569	892
1111	1379	892	1111	356	1111					217	569	356	569	892	356	569	892
1111	1379	892	1111	356	1111					217	569	356	569	892	356	569	892
1111	1379	892	1111	356	1111					217	569	356	569	892	356	569	892
1111	1379	892	1111	356	1111					217	569	356	569	892	356	569	892
1111	1379	892	1111	356	1111					217	569	356	569	892	356	569	892
1111	1379	892	1111	356	1111					217	569	356	569	892	356	569	892
1111	1379	892	1111	356	1111					217	569	356	569	892	356	569	892
1379	1379	892	1111	356	1111					217	569	356	569	892	356	569	892
1379	1379	892	1111	356	1111					217	569	356	569	892	356	569	892
1379	1379	892	1111	356	1111					217	569	356	569	892	356	569	892
1379	1379	892	1111	356	1111					217	569	356	569	892	356	569	892
1379	1379	892	1111	356	1111					217	569	356	569	892	356	569	892
1379	1379	892	1111	356	1111					217	569	356	569	892	356	569	892
1379	1379	892	1111	356	1111					217	569	356	569	892	356	569	892
1379	1379	892	1111	356	1111					217	569	356	569	892	356	569	892
1379	1379	892	1111	356	1111					217	569	356	569	892	356	569	892
1379	1379	892	1111	356	1111					217	569	356	569	892	356	569	892
1379	1379	892	1111	356	1379					217	569	356	569	892	356	569	892
1379	1379	892	1111	356	1379					217	569	356	569	892	356	569	892
1379	1379	892	1111	356	1379					217	569	356	569	892	356	569	892
1379	1379	892	1111	356	1379					217	569	356	569	892	356	569	892
1379	1379	892	1111	356	1379					217	569	356	569	892	356	569	892
1379	1379	892	1111	356	1379					217	569	356	569	892	356	569	892
1379	1379	892	1111	356	1379					217	569	356	569	892	356	569	892
1379	1379	892	1111	356	1379					217	569	356	569	892	356	569	892
1379	1379	892	1111	356	1379					217	569	356	569	892	356	569	892
1379	1379	892	1111	356	1379					217	569	356	569	892	356	569	892
1379	1379	892	1111	356	1379					217	569	356	569	892	356	569	892
1379	1379	892	1111	356	1379					217	569	356	569	892	356	569	892
1379	1379	892	1111	356	1379					217	569	356	569	892	356	569	892
1379	1379	892	1111	356	1379					217	569	356	569	892	356	569	892
1379	1379	892	1111	356	1379					217	569	356	569	892	356	569	892
1379	1379	892	1111	356	1379					217	569	356	569	892	356	569	892
1379	1379	892	1111	356	1379					217	569	356	569	892	356	569	892
1379	1379	892	1111	356	1379					217	569	356	569	892	356	569	892
1379	1379	892	1111	356	1379					217	569	356	569	892	356	569	892
1379	1379	892	1111	356	1379					217	569	356	569	892	356	569	892
1379	1379	892	1111	356	1379					217	569	356	569	892	356	569	892
1379	1379	892	1111	451	1379					217	569	356	569	892	356	569	892
1379	1379	892	1111	451	1379					217	569	356	569	892	356	569	892
1379	1379	892	1111	451	1379					217	569	356	569	892	356	569	892
1379	1379	892	1111	451	1379					217	569	356	569	892	356	569	892
1379	1379	892	1111	451	1379					217	569	356	569	892	356	569	892
1379	1379	892	1111	451	1379					217	569	356	569	892	356	569	892
1379	1379	892	1111	451	1379					217	569	356	569	892	356	569	892
1379	1379	892	1111	451	1379					217	569	356	569	892	356	569	892
1379	1379	892	1111	451	1379					217	569	356	569	892	356	569	892
1379	1379	892	1111	451	1379					217	569	356	569	892	356	569	892
1379	1379	892	1111	451	1379					217	569	356	569	892	356	569	892
1379	1379	892	1111	451	1379					217	569	356	569	892	356	569	892
1379	1379	892	1111	451	1379					217	569	356	569	892	356	569	892
1379	1379	892	1111	451	1379					217	569	356	569	892	356	569	892
1379	1379	892	1111	451	1379					217	569	356	569	892	356	569	892
1379	1379	892	1111	451	1379					217	569	356	569	892	356	569	892
1379	1379	892	1111	451	1379					217	569	356	569	892	356	569	892
1379	1379	892	1111	451	1379					217	569	356	569	892	356	569	892
1379	1379	892	1111	451	1379					217	569	356	569	892	356	569	892
1379	1379	892	1111	451	1379					217	569	356	569	892	356	569	892
1379	1379	892	1111	451	1379					217	569	356	569	892	356	569	892
1379	1379	892	1111	451	1379					217	569	356	569	892	356	569	892
1379	1379	892	1111	451	1379					217	569	356	569	892	356	569	892
1379	1379	892	1111	451	1379					217	569	356	569	892	356	569	892
1379	1379	892	1111	451	1379					217	569	356	569	892	356	569	892
1379	1379	892	1111	451	1379					217	569	356	569	892	356	569	892
1379	1379	892	1111	451	1379					217	569	356	714	892	356	569	892
1379	1379	892	1111	451	1379					217	569	356	714	892	356	569	892
1379	1379	892	1111	451	1379					217	569	356	714	892	356	569	892
1379	1379	892	1111	451	1379					217	569	356	714	892	356	569	892
1379	1379	892	1111	451	1379					217	569	356	714	892	356	569	892
1379	1379	892	1111	451	1379					217	569	356	714	892	356	569	892
1379	1379	892	1111	451	1379					217	569	356	714	892	356	569	892
1379	1379	892	1111	451	1379					217	569	356	714	892	356	569	892
1379	1379	892	1111	451	1379					217	569	356	714	892	356	569	892
1379	1379	892	1111	451	1379					217	569	356	714	892	356	569	892
1379	1379	892	1111	451	1379					217	569	356	714	892	356	569	892
1379	1379	892	1111	451	1379					217	569	356	714	892	356	569	892
1379	1379	892	1111	451	1379					217	569	356	714	892	356	569	892
1379	1379	892	1111	451	1379					217	569	356	714	892	356	569	892
1379	1379	892	1111	451	1379					217	569	356	714	892	356	569	892
1379	1379	892	1111	451	1379					217	569	356	714	892	356	569	892
1379	1379	892	1111	451	1379					217	569	356	714	892	356	569	892
1379	1379	892	1111	451	1379					217	569	356	714	892	356	569	892
1379	1379	892	1111	451	1379					217	569	356	714	892	356	569	892
1379	1379	892	1111	451	1379					217	569	356	714	892	356	569	892
1379	1379	892	1111	569	1379					217	569	356	714	892	356	569	892
1379	1379	892	1111	569	1379					217	569	356	714	892	356	569	892
1379	1379	892	1111	569	1379					217	569	356	714	892	356	569	892
1379	1379	892	1111	569	1379					217	569	356	714	892	356	569	892
1379	1379	892	1111	569	1379					217	569	356	714	892	356	569	892
1379	1379	892	1111	569	1379					217	569	356	714	892	356	569	892
1379	1379	892	1111	569	1379					217	569	356	714	892	356	569	892
1379	1379	892	1111	569	1379					217	569	356	714	892	356	569	892
1379	1379	892	1111	569	1379					217	569	356	714	892	356	569	892
1379	1379	892	1111	569	1379					217	569	356	714	892	356	569	892
1379	1379	892	1111	569	1379					217	569	356	714	892	356	569	892
1379	1379	892	1111	569	1379					217	569	356	714	892	356	569	892
1379	1379	892	1111	569	1379					217	569	356	714	892	356	569	892
1379	1379	892	1111	569	1379					217	569	356	714	892	356	569	892
1379	1379	892	1111	569	1379					217	569	356	714	892	356	569	892
1379	1379	892	1111	569	1379					217	569	356	714	892	356	569	892
1379	1379	892	1111	569	1379					217	569	356	714	892	356	569	892
1379	1379	892	1111	569	1379					217	569	356	714	892	356	569	892
1379	1379	892	1111	569	1379					217	569	356	714	892	356	569	892
1379	1379	892	1111	569	1379					217	569	356	714	892	356	569	892
1379	1379	892	1111	569	1379					217	569	356	714	892	356	569	892
1379	1379	892	1111	569	1379					217	569	356	714	892	356	569	892
1379	1379	892	1111	569	1379					217	569	356	714	892	356	569	892
1379	1379	892	1111	569	1379					217	569	356	714	892	356	569	892
1379	1379	892	1111	569	1379					217	569	356	714	892	356	569	892
1379	1379	892	1111	569	1379					217	569	356	714	892	356	569	892
1379	1379	892	1111	569	1379					217	569	356	714	892	356	569	892
1379	1379	892	1111	569	1379					217	569	356	714	892	356	569	892
1379	1379	892	1111	569	1379					217	569	356	714	892	356	569	892
1379	1379	892	1111	569	1379					217	569	356	714	892	356	569	892
1379	1379	892	1111	569	1379					217	569	356	714	892	356	569	892
1379	1379	892	1111	569	1379					217	569	356	714	892	356	569	892
1379	1379	892	1111	569	1379					217	569	356	714	892	356	569	892
1379	1379	892	1111	569	1379					217	569	356	714	892	356	569	892
1379	1379	892	1111	569	1379					217	569	356	714	892	356	569	892
1379	1379	892	1111	569	1379					217	569	356	714	892	356	569	892
1379	1379	892	1111	569	1379					217	569	356	714	892	356	569	1111
1379	1379	892	1111	569	1379					279	569	356	714	892	356	569	1111
1379	1379	892	1111	569	1379					279	569	356	714	892	356	569	1111
1379	1379	892	1111	569	1379					279	569	356	714	892	356	569	1111
1379	1379	892	1111	569	1379					279	569	356	714	892	356	569	1111
1379	1379	892	1111	569	1379					279	569	356	714	892	356	569	1111
1379	1379	892	1111	569	1379					279	569	356	714	892	356	569	1111
1379	1379	892	1111	569	1379					279	569	356	714	892	356	569	1111
1379	1379	892	1111	569	1379					279	569	356	714	892	356	569	1111
1379	1379	892	1111	569	1379					279	569	356	714	892	356	569	1111
1379	1379	892	1111	569	1379					279	569	356	714	892	356	569	1111
1379	1379	892	1111	569	1379					279	569	356	714	892	356	569	1111
1379	1379	892	1111	569	1379					279	569	356	714	892	356	569	1111
1379	1379	892	1111	569	1379					279	569	356	714	892	356	569	1111
1379	1379	892	1111	569	1379					279	569	356	714	892	356	714	1111
1379	1379	892	1111	569	1379					279	569	356	714	892	356	714	1111
1379	1379	892	1111	569	1379					279	569	356	714	892	356	714	1111
1379	1379	892	1111	569	1379					279	569	356	714	892	356	714	1111
1379	1379	892	1111	569	1379					279	569	356	714	892	356	714	1111
1379	1379	892	1111	569	1379					279	569	356	714	892	356	714	1111
1379	1379	892	1111	569	1379					279	569	356	714	892	356	714	1111
1379	1379	892	1111	569	1379					279	569	356	714	892	356	714	1111
1379	1379	892	1111	569	1379					279	569	356	714	892	356	714	1111
1379	1379	892	1111	569	1379					279	569	356	714	892	356	714	1111
1379	1379	892	1111	569	1379					279	569	356	714	892	356	714	1111
1379	1379	892	1111	569	1379					279	569	356	714	1111	356	714	1111
1379	1379	892	1111	569	1379					279	569	356	714	1111	356	714	1111
1379	1379	892	1111	569	1379					279	569	356	714	1111	356	714	1111
1379	1379	892	1111	569	1379					279	569	356	714	1111	356	714	1111
1379	1379	892	1111	569	1379					279	569	356	714	1111	356	714	1111
1379	1379	892	1111	714	1379					279	569	356	714	1111	356	714	1111
1379	1379	892	1111	714	1379					279	714	356	714	1111	356	714	1111
1379	1379	892	1111	714	1379					279	714	356	714	1111	356	714	1111
1707	1379	892	1111	714	1379					279	714	356	714	1111	356	714	1111
1707	1379	892	1111	714	1379					279	714	356	714	1111	356	714	1111
1707	1379	892	1111	714	1379					279	714	356	714	1111	356	714	1111
1707	1379	892	1111	714	1379					279	714	356	714	1111	356	714	1111
1707	1379	892	1111	714	1379					279	714	356	714	1111	356	714	1111
1707	1379	892	1111	714	1379					279	714	356	714	1111	356	714	1111
1707	1379	892	1111	714	1379					279	714	356	714	1111	356	714	1111
1707	1379	892	1111	714	1379					279	714	356	714	1111	356	714	1111
1707	1379	892	1111	714	1379					279	714	356	714	1111	356	714	1111
1707	1379	892	1111	714	1379					279	714	356	714	1111	356	714	1111
1707	1379	892	1111	714	1379					279	714	356	714	1111	356	714	1111
1707	1379	892	1111	714	1379					279	714	356	714	1111	356	714	1111
1707	1379	892	1111	714	1379					279	714	356	714	1111	356	714	1111
1707	1379	892	1111	714	1379					279	714	356	714	1111	356	714	1111
1707	1379	892	1111	714	1379					356	714	356	714	1111	356	714	1111
1707	1379	892	1111	714	1379					356	714	356	714	1111	356	714	1111
1707	1379	892	1111	714	1379					356	714	356	714	1111	356	714	1111
1707	1379	892	1111	714	1379					356	714	356	714	1111	356	714	1111
1707	1379	892	1111	714	1379					356	714	356	714	1111	356	714	1111
1707	1379	892	1111	714	1379					356	714	356	714	1111	356	714	1111
1707	1379	892	1111	714	1379					356	714	356	714	1111	356	714	1111
1707	1379	892	1111	714	1379					356	714	356	714	1111	356	714	1111
1707	1379	892	1111	714	1379					356	714	356	714	1111	356	714	1111
1707	1379	892	1111	714	1379					356	714	356	714	1111	356	714	1111
1707	1379	892	1111	714	1379					356	714	356	714	1111	356	714	1111
1707	1379	892	1111	714	1379					356	714	356	714	1111	356	714	1111
1707	1379	892	1111	714	1379					356	714	356	714	1111	356	714	1111
1707	1379	892	1111	714	1379					356	714	356	714	1111	356	714	1111
1707	1379	892	1111	714	1379					356	714	356	714	1111	356	714	1111
1707	1379	892	1111	714	1379					356	714	356	714	1111	356	714	1111
1707	1379	892	1111	714	1379					356	714	356	714	1111	356	714	1111
1707	1379	892	1111	714	1379					356	714	356	714	1111	356	714	1111
1707	1379	892	1111	714	1379					356	714	356	714	1111	356	714	1111
1707	1379	892	1111	714	1379					356	714	356	714	1111	356	714	1111
1707	1379	892	1111	714	1379					356	714	356	714	1111	356	714	1111
1707	1379	892	1111	714	1379					356	714	356	714	1111	356	714	1111
1707	1379	892	1111	714	1379					356	714	356	714	1111	356	714	1111
1707	1379	892	1111	714	1379					356	714	356	714	1111	356	714	1111
1707	1379	892	1111	714	1379					356	714	356	714	1111	356	714	1111
1707	1379	892	1111	714	1379					356	714	356	714	1111	356	714	1111
1707	1379	892	1111	714	1379					356	714	356	714	1111	356	714	1111
1707	1379	892	1111	714	1379					356	714	356	714	1111	356	714	1111
1707	1379	892	1111	714	1379					356	714	356	714	1111	356	714	1111
1707	1379	892	1111	714	1379					356	714	356	714	1111	356	714	1111
1707	1379	892	1111	714	1379					356	714	356	714	1111	356	714	1111
1707	1379	892	1111	714	1379					356	714	356	714	1111	356	714	1111
1707	1379	892	1111	714	1379					356	714	356	714	1111	356	714	1111
1707	1379	892	1111	714	1379					356	714	356	714	1111	356	714	1111
1707	1379	892	1111	714	1379					356	714	356	714	1111	356	714	1111
1707	1379	892	1111	714	1379					356	714	356	714	1111	356	714	1111
1707	1379	892	1111	714	1379					356	714	356	714	1111	356	714	1111
1707	1379	892	1111	714	1379					356	714	356	714	1111	356	714	1111
1707	1379	892	1111	714	1379					356	714	356	714	1111	356	714	1111
1707	1379	892	1111	714	1379					356	714	356	714	1111	356	714	1111
1707	1379	892	1111	714	1379					356	714	356	714	1111	356	714	1111
1707	1379	892	1111	714	1379					356	714	356	714	1111	356	714	1111
1707	1379	892	1111	714	1379					356	714	356	714	1111	356	714	1111
1707	1379	892	1111	714	1379					356	714	356	714	1111	356	714	1111
1707	1379	892	1111	714	1379					356	714	356	714	1111	356	714	1111
1707	1379	892	1111	714	1379					356	714	356	714	1111	356	714	1111
1707	1379	892	1111	714	1379					356	714	356	714	1111	356	714	1111
1707	1379	892	1111	714	1379					356	714	356	714	1111	356	714	1111
1707	1379	892	1111	714	1379					356	714	356	714	1111	356	714	1111
1707	1379	892	1111	714	1379					356	714	356	714	1111	356	714	1111
1707	1379	892	1111	714	1379					356	714	356	714	1111	356	714	1111
1707	1379	892	1111	714	1379					356	714	356	714	1111	356	714	1111
1707	1379	892	1111	714	1379					356	714	356	714	1111	356	714	1111
1707	1379	892	1111	714	1379					356	714	356	714	1111	356	714	1111
1707	1379	892	1111	714	1379					356	714	356	714	1111	356	714	1111
1707	1379	892	1111	714	1379					356	714	356	714	1111	356	714	1111
1707	1379	892	1111	714	1379					356	714	356	714	1111	356	714	1111
1707	1379	892	1111	714	1379					356	714	356	714	1111	356	714	1111
1707	1379	892	1111	714	1379					356	892	356	714	1111	356	714	1111
1707	1379	892	1111	714	1379					356	892	356	714	1111	356	714	1111
1707	1379	892	1111	714	1379					356	892	356	714	1111	356	714	1111
1707	1379	892	1111	714	1379					356	892	356	714	1111	356	714	1111
1707	1379	1111	1111	714	1379					356	892	356	714	1111	356	714	1111
1707	1379	1111	1111	714	1379					356	892	356	714	1111	356	714	1111
1707	1379	1111	1111	714	1379					356	892	356	714	1111	356	714	1111
1707	1379	1111	1111	714	1379					356	892	356	714	1111	356	714	1111
1707	1379	1111	1111	714	1379					356	892	356	714	1111	356	714	1111
1707	1379	1111	1111	714	1379					356	892	356	714	1111	356	714	1111
1707	1379	1111	1111	714	1379					356	892	356	714	1111	356	714	1111
1707	1379	1111	1111	714	1379					356	892	356	714	1111	356	714	1111
1707	1379	1111	1111	714	1707					356	892	356	714	1111	356	714	1111
1707	1379	1111	1111	714	1707					356	892	356	714	1111	356	714	1111
1707	1379	1111	1111	714	1707					356	892	356	714	1111	356	714	1111
1707	1379	1111	1111	714	1707					356	892	356	714	1111	356	714	1111
1707	1379	1111	1111	714	1707					356	892	356	714	1111	356	714	1111
1707	1379	1111	1111	714	1707					356	892	356	714	1111	356	714	1111
1707	1379	1111	1111	714	1707					356	892	356	714	1111	356	714	1111
1707	1379	1111	1111	714	1707					356	892	356	714	1111	356	714	1111
1707	1379	1111	1111	714	1707					356	892	356	714	1111	356	714	1111
1707	1379	1111	1111	714	1707					356	892	356	714	1111	356	714	1111
1707	1379	1111	1111	714	1707					356	892	356	714	1111	356	714	1111
1707	1379	1111	1111	714	1707					356	892	356	714	1111	356	714	1111
1707	1379	1111	1111	714	1707					356	892	356	714	1111	356	714	1111
1707	1379	1111	1111	714	1707					356	892	356	714	1111	356	714	1111
1707	1379	1111	1111	714	1707					356	892	356	714	1111	356	714	1111
1707	1379	1111	1111	714	1707					356	892	356	714	1111	356	714	1111
1707	1379	1111	1111	714	1707					356	892	356	714	1111	356	714	1111
1707	1379	1111	1111	714	1707					356	892	356	714	1111	356	714	1111
1707	1379	1111	1111	714	1707					356	892	356	714	1111	356	714	1111
1707	1379	1111	1111	714	1707					356	892	356	714	1111	356	714	1111
1707	1379	1111	1111	714	1707					356	892	356	714	1111	356	714	1111
1707	1379	1111	1111	714	1707					356	892	356	714	1111	356	714	1111
1707	1379	1111	1111	714	1707					356	892	356	714	1111	356	714	1111
1707	1379	1111	1111	714	1707					356	892	356	714	1111	356	714	1111
1707	1379	1111	1111	714	1707					356	892	356	714	1111	356	714	1111
1707	1379	1111	1111	714	1707					356	892	356	714	1111	356	714	1111
1707	1379	1111	1111	714	1707					356	892	356	714	1111	356	714	1111
1707	1379	1111	1111	714	1707					356	892	356	714	1111	356	714	1111
1707	1379	1111	1111	714	1707					356	892	356	714	1111	356	714	1111
1707	1379	1111	1111	714	1707					356	892	356	714	1111	356	714	1111
1707	1379	1111	1111	714	1707					356	892	356	714	1111	356	714	1111
1707	1379	1111	1111	714	1707					356	892	356	714	1111	356	714	1111
1707	1379	1111	1111	714	1707					356	892	356	714	1111	356	714	1111
1707	1379	1111	1111	714	1707					356	892	356	714	1111	356	714	1111
1707	1379	1111	1111	714	1707					356	892	356	714	1111	356	714	1111
1707	1379	1111	1111	714	1707					356	892	356	714	1111	356	714	1111
1707	1379	1111	1111	714	1707					356	892	356	714	1111	356	714	1111
1707	1379	1111	1111	714	1707					356	892	356	714	1111	356	714	1111
1707	1379	1111	1111	714	1707					356	892	356	714	1111	356	714	1111
1707	1379	1111	1111	714	1707					356	892	356	714	1111	356	714	1111
1707	1379	1111	1111	714	1707					356	892	356	714	1111	356	714	1111
1707	1379	1111	1111	714	1707					356	892	356	714	1111	356	714	1111
1707	1379	1111	1111	714	1707					356	892	356	714	1111	356	714	1111
1707	1379	1111	1111	714	1707					356	892	356	714	1111	356	714	1111
1707	1379	1111	1111	714	1707					356	892	356	714	1111	356	714	1111
1707	1379	1111	1111	714	1707					356	892	356	714	1111	356	714	1111
1707	1379	1111	1111	714	1707					356	892	356	714	1111	356	714	1111
1707	1379	1111	1111	714	1707					356	892	356	714	1111	356	714	1111
1707	1379	1111	1111	714	1707					356	892	356	714	1111	356	714	1111
