# Supplementary material for: Metabolic sensing in AgRP neurons integrates homeostatic state with dopamine signalling in the striatum
Source: eLife journal article supplement (doi:10.7554/elife.72668), 2022-01-12
Supplement: fig3-data1 [file Fig3C.xlsx]

## Sheet: Sheet1
	KO										WT
FR1	0.525547	0.567568	0.69697	0.414966	0.709091	0.461538	0.676923				0.0821918	0.520548	0.924528	0.844828	0.712121	0.64
FR1	0.790698	0.739583	0.756522	0.863014	0.84	0.885714	0.66				0.40625	0.753086	0.963636	0.740741	0.788462	0.827586
FR1	0.849315	0.893939	0.837209	0.625	0.89011	0.897727	0.712766				0.835052	0.71875	0.962963	0.648148	0.784946	0.695652
FR1	0.723077	0.914286	0.711864	0.918033	0.907407	0.819277	0.833333				0.914634	0.673913	0.943396	0.790698	0.745098	0.705882
FR1	0.792453	0.825397	0.851852	0.876923	0.94898	0.796875	0.68254				0.71875	0.771429	0.797101	0.861702	0.861702	0.848361
FR3	0.742574	0.911111	0.618462	0.826347	0.745645	0.798701	0.877551				0.855721	0.84	0.791667	0.782609	0.841463	0.839216
FR3	0.813433	0.768473	0.872587	0.93125	0.881633	0.870968	0.844444				0.826667	0.719577	0.957746	0.779528	0.806324	0.887324
FR3	0.758242	0.932836	0.848361	0.790698	0.83908	0.837838	0.873469				0.905882	0.784884	0.95122	0.75	0.844828	0.827957
FR5	0.924051	0.833333	0.864662	0.925373	0.907186	0.834197	0.910596				0.859259	0.869565	0.96	0.864662	0.914179	0.772727
FR5	0.792169		0.909314	0.854599	0.933333		0.8125				0.93361		0.947137	0.842541	0.886076	0.926829
FR5	0.844523	0.952381	0.899123	0.90301	0.934718	0.899123	0.952381				0.96831	0.862416	0.959184	0.96831	0.862416	0.959184
