# Supplementary material for: Metabolic sensing in AgRP neurons integrates homeostatic state with dopamine signalling in the striatum
Source: eLife journal article supplement (doi:10.7554/elife.72668), 2022-01-12
Supplement: fig3-data1 [file Fig3D.xlsx]

## Sheet: Sheet1
	KO									WT
fed	77	32	77	50	77	77	50	77	95	40	32	118	77	32	95	77	50
fasted	178	95	268	268	219	95	118	219		402	402	178	268	402	268
