# Supplementary material for: Metabolic sensing in AgRP neurons integrates homeostatic state with dopamine signalling in the striatum
Source: eLife journal article supplement (doi:10.7554/elife.72668), 2022-01-12
Supplement: fig3-data1 [file Fig3E.xlsx]

## Sheet: Sheet1
	KO									WT
fed	14	10	14	12	14	14	12	14	15	11	10	16	14	10	15	14	12
fasted	18	15	20	20	19	15	16	19		22	22	18	20	22	20
