# Supplementary material for: Metabolic sensing in AgRP neurons integrates homeostatic state with dopamine signalling in the striatum
Source: eLife journal article supplement (doi:10.7554/elife.72668), 2022-01-12
Supplement: fig3-data1 [file Fig3G.xlsx]

## Sheet: Sheet1
WT										KO
0	0	0	0	0	0					0	0	0	0	0	0	0	0
0	0	0	0	0	0					0	0	0	0	0	0	0	0
0	0	0	0	0	0					0	0	0	0	0	0	0	0
0	0	0	0	0	0					0	0	0	0	0	0	0	0
0	0	0	0	0	0					0	0	0	0	0	0	0	0
0	0	0	0	0	0					0	0	0	0	0	0	0	0
0	0	0	0	0	0					0	0	0	0	0	0	0	0
0	0	0	0	0	0					0	0	0	0	0	0	0	0
0	0	0	0	0	0					0	0	0	0	0	0	0	0
0	0	0	0	0	0					0	0	0	0	0	0	0	0
0	0	0	0	0	0					0	4	0	0	0	0	0	0
0	0	0	0	0	0					0	4	0	0	0	0	0	0
0	0	0	0	0	0					0	4	0	0	0	0	0	0
0	0	0	0	1	0					0	4	0	0	0	0	0	0
1	0	0	0	1	0					0	4	0	0	0	0	0	0
1	0	0	0	1	0					0	4	0	0	0	0	0	0
1	0	0	0	1	0					0	4	0	0	0	0	0	0
1	0	0	0	1	0					0	4	0	0	0	0	0	0
1	0	0	0	1	0					0	4	0	0	0	0	0	0
1	0	0	0	1	0					0	4	0	0	0	0	0	0
1	0	0	0	1	0					0	4	0	0	0	0	0	0
1	0	0	0	1	0					0	4	0	0	0	0	0	0
1	0	0	0	1	0					0	4	0	0	0	0	0	0
1	0	0	1	1	0					2	4	0	0	0	0	0	0
1	0	0	1	1	0					2	4	0	0	0	0	0	0
1	0	0	1	1	0					2	4	0	0	0	0	0	0
1	0	0	1	1	0					2	4	0	0	0	0	0	0
1	0	0	1	1	0					2	4	0	0	0	0	1	0
1	0	0	1	1	0					2	4	0	0	0	0	1	0
1	0	0	1	1	0					2	4	0	0	0	0	1	0
1	0	0	1	1	0					2	4	0	0	0	0	1	0
1	0	0	1	1	0					2	4	0	0	0	0	1	0
1	0	0	1	1	0					2	4	0	0	0	0	1	0
1	0	0	1	1	0					2	4	0	0	0	0	1	0
1	0	0	1	1	0					2	4	0	0	0	0	1	0
1	0	0	1	1	0					2	4	0	0	0	0	1	0
1	0	0	1	1	0					2	4	0	0	0	0	1	0
1	0	0	1	1	0					2	4	0	0	0	0	1	0
1	0	0	1	1	0					2	4	0	0	0	0	1	0
1	0	0	1	1	0					2	4	0	0	0	0	1	0
1	0	0	1	1	0					2	4	0	0	0	0	1	0
1	0	0	1	1	0					2	4	0	0	0	0	1	0
1	0	0	1	1	0					2	4	0	0	0	0	1	0
1	0	0	1	1	0					2	4	0	0	0	0	1	0
1	0	0	1	1	0					2	4	0	0	0	0	1	0
1	0	0	1	1	0					2	4	0	0	0	0	1	0
1	0	0	1	1	0					2	4	0	0	0	0	1	0
1	0	0	1	1	0					2	4	0	0	0	0	1	0
1	0	0	1	1	0					2	4	0	0	0	0	1	0
1	0	0	1	1	0					2	4	0	0	0	0	1	0
1	0	0	1	1	0					2	4	0	0	0	0	1	0
1	0	0	1	1	0					2	4	0	0	0	0	1	0
1	0	0	1	1	0					2	4	0	0	0	0	1	0
1	0	0	1	1	0					2	4	0	0	0	0	1	0
1	0	0	1	1	0					2	4	0	0	0	0	1	0
1	0	0	1	1	0					2	4	0	0	1	0	1	0
1	0	0	1	1	0					2	4	0	0	1	0	1	0
1	0	0	1	2	2					2	4	0	0	1	3	1	0
1	0	0	1	2	2					2	4	0	0	1	3	1	0
1	0	0	1	2	2					2	4	0	0	1	3	1	0
1	0	0	1	2	2					2	4	0	0	1	3	1	0
1	0	0	1	2	2					2	4	0	0	1	3	1	0
1	0	0	1	2	2					2	4	0	0	1	3	1	0
1	0	0	1	2	2					2	4	0	0	1	3	1	0
1	0	0	1	2	2					2	4	0	0	1	3	1	0
1	0	0	1	2	2					2	4	0	0	1	3	1	0
1	0	0	1	2	2					2	4	0	0	1	3	1	0
1	0	0	1	2	2					2	4	0	0	1	3	1	0
1	0	0	1	2	2					2	4	0	0	1	3	1	0
1	0	0	1	2	2					2	4	0	0	1	3	1	0
1	0	0	1	2	2					2	4	0	0	1	3	1	0
1	0	0	1	2	2					2	4	0	0	1	3	1	0
1	0	0	1	2	2					2	4	0	0	1	3	1	0
1	0	0	1	2	2					2	4	0	0	1	3	1	0
1	0	0	1	2	2					2	4	0	0	1	3	1	0
1	0	0	1	2	2					2	4	0	0	1	3	1	0
1	0	0	1	2	2					2	4	0	0	1	3	1	0
1	0	0	1	2	2					2	4	0	0	1	3	1	0
1	0	0	1	2	2					2	4	0	0	1	3	1	0
1	0	0	1	2	2					2	4	1	0	1	3	1	0
1	0	0	1	2	2					2	4	1	0	1	3	1	0
1	0	0	1	2	2					2	4	1	0	1	3	1	0
1	0	0	1	2	2					2	4	1	0	1	3	1	0
1	0	0	1	2	2					2	4	1	0	1	3	1	0
1	0	0	1	2	2					2	4	1	0	1	3	1	0
1	0	0	1	2	2					2	4	1	0	1	3	1	0
1	0	0	1	2	2					2	4	1	0	1	3	1	0
1	0	0	1	2	2					2	4	1	0	1	3	1	0
1	0	0	1	2	10					2	4	1	0	1	3	1	0
1	0	0	1	2	10					2	4	1	0	1	3	1	0
1	0	0	1	2	10					2	4	1	0	1	3	1	0
1	0	0	1	2	10					2	4	1	0	1	3	1	0
1	0	0	1	2	10					2	4	1	0	1	3	1	0
1	0	0	1	2	10					2	4	1	0	1	3	1	0
1	0	0	1	2	10					2	4	1	0	1	3	1	0
1	0	0	1	2	10					2	4	1	0	1	3	1	0
1	0	0	1	2	10					2	4	1	0	1	3	1	0
1	1	0	1	2	10					2	4	1	0	1	3	1	0
1	1	0	1	2	10					2	4	1	0	1	3	1	0
1	1	0	1	2	10					2	4	1	0	1	3	1	0
1	1	0	1	2	10					2	4	1	0	1	3	1	0
1	1	0	1	2	10					2	4	1	0	1	3	1	0
1	1	0	1	2	10					2	4	1	0	1	3	1	0
1	1	0	1	2	10					2	4	1	0	1	3	1	0
1	1	0	1	2	10					2	4	1	0	1	3	1	0
1	1	0	1	2	10					2	4	1	0	1	3	1	0
1	1	0	1	2	10					2	4	1	0	1	3	1	0
1	1	0	1	2	10					2	4	1	0	1	3	1	0
1	1	0	1	2	10					2	4	1	0	1	3	1	0
1	1	0	1	2	10					2	4	1	0	1	3	1	0
1	1	0	1	2	10					2	4	1	0	1	3	1	0
1	1	0	1	2	10					2	4	1	0	1	3	1	0
1	1	0	1	2	10					2	4	1	0	1	3	1	0
1	1	0	1	2	10					2	4	1	0	1	3	1	0
1	1	0	1	2	10					2	4	1	0	1	3	1	0
1	1	0	1	2	10					2	4	1	0	1	3	1	0
1	1	0	1	2	10					2	4	1	0	1	3	1	0
1	1	0	1	2	10					2	4	1	0	1	3	1	0
1	1	0	1	2	10					2	4	1	0	1	3	1	0
1	1	0	1	2	10					2	4	1	0	1	3	1	0
1	1	0	1	2	10					2	4	1	0	1	3	1	0
1	1	0	1	2	10					2	4	1	0	1	3	1	0
1	1	0	1	2	10					2	4	1	0	1	3	1	0
1	1	0	1	2	10					2	4	1	0	1	3	1	0
1	1	0	1	2	10					2	4	1	0	1	3	1	0
1	1	0	1	2	10					2	4	2	0	1	3	1	0
1	1	0	1	2	10					2	4	2	1	1	3	1	0
1	1	0	1	2	10					2	4	2	4	1	3	1	0
1	1	0	1	2	10					2	4	2	4	1	3	1	0
1	1	0	1	2	10					2	4	2	4	1	3	1	0
1	1	0	1	2	10					2	4	2	4	1	4	1	0
1	1	0	1	2	10					2	4	2	4	1	4	1	0
1	1	0	1	2	10					2	4	2	4	1	4	1	0
1	1	0	1	3	10					2	4	2	4	1	4	1	0
1	1	0	1	3	10					2	4	2	4	1	4	1	0
1	4	0	1	3	10					2	4	2	4	1	4	1	0
1	4	0	1	3	10					2	4	2	4	1	4	1	0
1	4	0	1	3	10					2	4	2	4	1	4	1	0
1	4	0	1	3	10					2	4	2	4	1	4	1	0
1	4	0	1	3	10					2	4	2	4	1	4	1	0
1	4	0	1	3	10					2	4	2	4	1	4	1	0
1	4	0	1	3	10					2	4	2	4	1	4	1	0
1	4	0	1	3	10					2	4	2	4	1	4	1	0
1	4	0	1	3	10					2	4	2	4	1	4	1	0
1	4	0	1	3	10					2	4	2	4	1	4	1	0
1	4	0	1	3	10					2	4	2	4	1	4	1	0
1	4	0	1	3	10					2	4	2	4	1	4	1	0
1	4	0	1	3	10					2	4	2	4	1	4	1	0
1	4	0	1	3	10					2	4	2	4	1	4	1	0
1	4	0	1	3	10					2	4	2	4	1	4	1	0
1	4	0	1	3	10					2	4	2	4	1	4	1	0
1	4	0	1	3	10					2	4	2	4	1	4	1	0
1	4	0	1	3	10					2	4	4	4	1	4	1	0
1	4	0	1	3	10					2	4	4	4	1	4	1	0
1	4	0	1	3	10					2	4	4	5	2	4	1	0
1	4	0	1	3	10					2	4	4	5	2	5	1	0
1	4	0	1	9	10					3	4	4	5	2	5	1	0
1	4	0	1	9	10					3	4	4	5	2	5	1	0
1	4	0	1	9	10					3	4	4	5	2	5	1	0
1	4	0	1	9	10					3	4	4	5	2	5	1	0
1	4	0	1	9	10					3	4	4	5	2	5	1	0
1	4	0	1	9	10					3	4	4	5	2	5	1	0
1	4	0	1	9	10					3	4	4	5	2	5	1	0
1	4	0	1	9	10					3	4	4	5	2	5	1	0
1	4	0	1	9	10					3	4	4	5	2	5	1	0
1	4	0	1	9	10					3	4	4	5	2	5	1	0
1	4	0	1	9	10					3	4	4	5	2	5	1	0
1	4	0	1	9	10					3	4	4	5	2	5	1	0
1	4	0	1	9	11					3	4	5	5	2	5	1	0
1	4	0	1	9	11					3	4	5	5	2	5	1	0
1	4	0	1	9	11					3	4	5	5	3	5	1	0
1	4	0	1	9	11					3	4	5	5	3	5	1	0
1	4	0	1	9	11					3	4	5	5	3	5	1	0
1	4	0	1	9	11					3	4	5	5	3	5	1	0
1	4	0	1	9	11					3	4	5	5	3	5	1	0
1	4	0	1	9	11					3	4	5	5	3	5	1	0
1	4	0	1	9	11					3	4	5	5	3	5	1	0
1	4	0	1	9	11					3	4	5	5	3	5	1	0
1	4	0	1	9	11					3	4	5	5	3	5	1	0
1	4	0	1	9	11					3	4	5	5	3	5	2	0
1	4	0	1	9	11					3	4	5	5	3	5	2	0
1	4	0	1	9	19					3	4	5	5	3	5	2	0
1	4	2	1	9	19					3	4	5	5	3	6	2	0
1	4	2	1	11	19					3	4	5	5	3	6	2	0
1	4	2	1	11	19					3	4	7	5	3	6	2	0
1	4	2	1	11	19					3	4	7	5	3	6	2	0
1	4	2	1	11	19					3	4	7	5	3	6	2	0
1	4	2	1	11	19					3	4	7	5	3	6	2	0
1	4	2	1	11	19					3	4	7	25	3	6	2	0
1	4	2	1	11	19					3	4	7	25	3	6	2	0
1	4	2	1	11	19					3	4	7	25	3	6	2	0
1	4	3	1	11	19					3	4	7	25	3	6	2	0
1	4	3	1	11	19					3	4	7	25	3	6	2	0
1	4	3	1	11	19					3	4	7	25	3	6	2	0
1	4	3	1	11	19					3	4	7	25	4	6	2	0
1	4	3	1	11	20					3	4	7	25	4	6	2	0
1	4	3	1	11	20					3	4	7	25	4	6	2	0
1	4	3	1	11	20					3	4	7	25	4	6	2	0
1	4	3	1	11	20					3	4	7	25	4	6	2	0
2	4	3	1	11	20					3	4	11	25	4	6	2	0
2	4	3	1	11	20					3	4	11	25	4	6	2	0
2	4	3	1	11	20					3	4	11	25	4	7	2	0
2	4	3	1	11	20					3	4	11	25	4	7	2	0
2	4	3	1	11	20					3	4	11	25	4	7	2	0
2	7	3	1	11	20					3	4	11	25	4	7	2	0
2	7	3	1	11	20					3	4	11	25	4	7	2	0
2	7	3	1	11	20					3	4	11	25	4	7	2	0
2	7	3	1	11	20					3	4	11	25	4	7	2	0
2	7	4	1	11	20					3	4	11	32	4	7	2	0
2	7	4	1	11	20					3	4	11	32	4	7	2	0
2	7	4	1	11	20					3	6	11	32	4	7	2	0
2	7	4	1	11	20					3	6	11	32	4	7	2	0
2	7	4	1	11	20					3	6	11	32	4	7	2	0
2	7	4	1	11	20					3	6	11	32	4	7	2	0
2	7	4	1	11	20					4	6	11	32	4	7	2	0
2	7	4	1	11	20					4	6	11	32	4	7	2	0
2	7	4	1	11	20					4	6	11	32	4	7	2	0
2	7	4	1	11	20					4	6	11	32	4	7	2	0
2	7	4	1	11	20					4	6	11	32	4	7	2	0
2	7	4	1	11	20					4	6	14	32	4	7	2	0
2	7	4	1	11	20					4	6	14	32	4	7	2	0
2	7	4	1	11	20					4	6	14	32	4	7	2	0
2	7	4	1	11	20					4	6	14	32	4	7	2	0
2	7	4	1	11	20					4	6	14	32	4	7	2	0
2	7	4	1	11	20					4	6	14	32	4	8	2	0
2	7	4	1	11	20					4	6	14	32	4	8	2	0
2	7	4	1	11	20					4	6	14	32	4	8	2	0
2	7	4	1	11	20					4	6	14	32	4	8	2	0
2	7	4	1	11	20					4	6	14	32	4	8	2	0
2	7	4	1	11	21					4	6	14	32	4	8	2	0
2	7	4	1	11	21					4	6	14	32	4	8	2	0
2	7	4	1	11	21					4	6	14	32	4	8	2	0
2	7	4	1	11	21					4	6	14	32	4	8	2	0
2	7	4	1	11	21					4	6	14	32	4	8	2	0
2	7	4	1	11	21					4	6	14	32	9	8	2	0
2	7	4	1	11	21					4	6	14	32	9	8	2	0
2	7	4	1	11	21					4	6	14	32	9	8	2	0
2	7	4	1	11	21					4	6	14	32	9	8	2	0
2	7	4	1	11	21					4	6	14	32	9	8	2	0
2	7	4	1	11	21					4	6	14	32	9	8	2	0
2	7	4	1	11	21					4	6	14	32	9	8	2	0
2	7	4	1	11	21					4	6	14	32	9	8	2	0
2	7	4	1	11	21					4	6	14	32	9	8	2	0
2	7	4	1	11	21					4	6	14	32	9	8	2	0
2	7	4	1	11	21					4	6	14	32	9	8	2	0
2	7	4	1	11	21					4	6	14	32	9	8	2	0
2	7	4	1	11	21					4	6	14	32	9	8	2	0
2	7	4	1	11	24					4	6	14	32	9	8	2	0
2	7	4	1	11	24					4	6	14	32	9	8	2	0
2	7	4	1	11	24					4	7	14	32	9	8	2	0
2	8	4	1	11	24					4	7	16	32	9	8	2	0
2	8	4	1	11	24					4	7	16	32	9	8	2	0
2	8	4	1	11	24					4	7	16	32	9	8	2	0
2	8	4	1	11	24					4	7	16	32	9	8	2	0
2	8	4	1	11	24					4	7	16	32	9	8	2	0
2	8	7	1	11	24					4	7	16	32	9	8	2	0
2	8	7	1	20	24					4	7	16	32	9	8	2	0
2	8	7	1	20	24					4	7	16	32	9	13	2	0
2	8	7	1	20	24					4	7	16	32	9	13	2	0
2	8	7	4	20	24					4	7	16	32	9	13	2	0
2	8	7	4	20	24					4	17	16	32	9	13	2	0
2	8	7	4	20	24					4	17	16	32	9	13	2	0
2	8	7	4	20	24					4	17	16	32	9	13	2	0
2	8	7	4	20	24					4	17	16	32	9	13	2	0
2	8	7	4	20	24					7	17	16	32	9	13	2	0
2	8	7	4	20	24					7	17	16	32	9	13	2	0
2	8	7	4	20	24					7	17	16	32	9	13	2	0
2	8	7	4	20	29					7	17	16	32	9	13	2	0
2	8	7	4	20	29					7	17	16	32	9	13	2	0
2	8	7	4	20	29					7	17	16	32	9	13	2	0
2	8	7	4	20	29					7	17	16	32	9	13	2	0
2	8	7	4	20	29					7	17	16	32	9	13	2	0
2	8	7	4	20	29					7	17	16	32	9	13	2	0
2	8	7	4	20	29					7	17	16	32	9	13	2	0
2	8	7	4	20	29					7	17	16	32	9	13	2	0
2	8	7	4	20	29					7	17	16	32	9	13	2	0
2	8	7	4	20	29					7	17	16	32	26	13	2	0
2	8	7	4	20	29					7	17	16	32	26	13	2	0
2	8	7	4	20	29					7	17	16	32	26	13	2	0
2	8	7	4	20	29					7	17	16	32	26	13	2	0
2	8	7	4	20	29					7	17	16	32	26	13	2	0
2	8	7	4	20	29					7	17	33	32	26	15	2	0
2	8	7	4	20	29					7	17	33	32	26	15	2	0
2	8	7	4	20	29					7	17	33	32	26	15	2	0
2	8	7	4	20	29					7	17	33	32	26	15	2	0
2	8	7	4	20	29					7	17	33	32	26	15	2	0
2	8	7	4	20	29					7	17	33	32	26	15	2	0
2	8	7	4	20	29					7	17	33	32	26	15	2	0
2	8	7	4	20	29					7	17	33	104	26	15	2	0
2	8	10	4	20	29					7	17	33	104	26	15	2	0
2	8	10	4	26	29					7	17	33	104	26	15	2	0
2	8	10	4	26	29					10	17	33	104	26	15	2	0
2	8	10	4	26	33					10	17	33	104	26	15	2	0
2	8	10	4	26	33					10	17	33	104	26	15	2	0
2	8	10	4	26	33					10	17	33	104	26	15	2	0
2	8	10	4	26	33					10	17	33	104	26	15	2	0
2	8	10	4	26	33					10	17	33	104	26	15	2	0
2	8	10	4	26	33					10	17	33	104	26	15	2	0
11	8	10	4	26	33					10	17	33	104	26	15	2	0
11	8	10	4	26	33					10	17	33	104	26	15	2	0
11	8	10	4	26	33					10	17	33	104	26	15	2	0
11	8	10	4	26	33					10	17	33	104	26	15	2	0
11	8	10	11	26	33					10	17	33	104	26	15	2	0
11	8	10	11	26	33					10	17	33	104	26	15	2	0
11	8	10	11	26	33					10	17	33	104	26	15	2	0
11	8	10	11	26	33					10	17	33	104	26	15	2	0
11	8	10	11	26	33					10	17	33	104	26	15	2	0
11	8	10	11	26	33					10	17	33	104	26	15	2	0
11	8	10	11	26	33					10	17	33	104	26	15	2	0
11	8	10	11	26	33					10	17	33	104	26	17	2	0
11	8	10	11	26	33					10	17	33	104	26	17	2	0
11	8	10	11	26	33					10	17	33	104	26	17	2	0
11	8	10	11	26	33					10	17	33	104	26	17	2	0
11	8	10	11	26	33					10	17	33	104	26	17	2	0
11	8	10	11	26	33					10	17	33	104	26	17	2	0
11	8	10	11	26	33					10	17	33	104	26	17	2	0
11	8	10	11	26	33					10	17	33	104	26	17	2	0
11	8	10	11	26	33					10	17	33	104	26	17	2	0
11	8	10	11	26	33					10	17	33	104	26	17	2	0
11	8	10	11	26	39					10	17	33	104	26	17	2	0
11	8	10	11	26	39					10	17	33	104	26	17	2	10
11	8	10	11	26	39					10	17	33	104	26	17	2	10
11	8	10	11	26	39					10	17	33	104	26	17	2	10
11	8	10	11	26	39					10	17	84	104	26	17	2	10
11	8	10	11	26	39					10	17	84	104	26	17	2	10
11	8	10	11	26	39					10	17	84	104	26	17	2	10
11	8	10	11	26	39					18	17	84	104	26	17	2	10
11	8	10	11	26	39					18	17	84	104	26	17	2	10
11	8	10	11	26	39					18	17	84	104	26	17	2	10
11	8	10	15	26	39					18	17	84	104	26	17	2	10
11	8	10	15	26	39					18	17	84	104	26	17	2	12
11	8	10	15	26	39					18	17	84	104	26	17	2	12
13	8	10	15	26	39					18	17	84	104	26	17	2	12
13	8	10	15	26	39					18	17	84	104	26	17	2	12
13	8	10	15	26	39					18	17	84	104	26	17	2	12
13	8	10	15	26	39					18	17	84	104	26	17	2	12
13	8	10	15	26	39					18	17	84	104	26	17	2	12
13	8	10	15	26	39					18	17	84	104	26	17	2	12
13	8	10	15	26	39					18	17	84	104	26	17	2	12
13	8	10	15	26	39					18	17	84	104	26	17	2	12
13	8	10	15	26	39					18	17	84	104	26	17	2	12
13	8	10	15	26	39					18	17	84	104	26	17	2	12
13	8	10	15	26	39					18	17	84	104	26	17	2	12
13	8	10	15	26	39					18	17	84	104	26	17	2	12
13	8	10	15	26	39					18	17	84	104	26	17	2	12
22	8	10	15	26	39					18	17	84	104	26	19	2	12
22	8	10	15	26	39					18	17	84	104	26	19	2	12
22	8	10	15	26	39					18	17	84	104	26	19	2	12
22	8	10	15	29	39					18	17	84	179	26	19	2	12
22	8	10	17	29	41					18	17	84	179	26	19	2	12
22	8	10	17	29	41					18	17	84	179	26	19	2	12
22	8	10	17	29	41					18	17	84	179	26	19	2	12
22	8	10	17	29	41					18	17	84	179	26	19	2	46
22	8	10	17	29	41					18	17	84	179	26	19	2	46
23	8	10	17	29	41					18	24	84	179	26	19	2	46
23	8	10	17	29	41					18	24	84	179	26	19	2	46
23	8	10	17	29	41					18	24	84	179	26	19	2	46
23	8	10	17	29	41					18	24	84	179	26	19	2	46
23	8	10	17	29	41					18	24	84	179	26	19	2	46
23	8	10	17	29	41					18	24	84	179	26	19	2	46
23	8	10	17	29	41					18	24	84	221	26	19	2	46
23	8	10	17	29	41					18	24	84	221	26	19	2	46
23	8	59	17	29	41					18	24	84	221	26	19	2	46
23	8	59	17	29	41					18	24	84	221	26	19	2	46
23	8	59	17	29	41					21	24	84	221	26	19	2	46
23	8	59	17	29	41					21	24	84	221	26	19	2	46
23	8	59	17	29	41					21	24	84	221	26	19	2	46
23	8	59	17	29	41					21	24	84	221	31	19	2	46
23	8	59	17	29	41					21	24	84	221	31	19	2	46
23	8	59	17	29	41					21	24	84	221	31	19	2	46
23	8	59	17	29	41					21	24	84	221	31	19	2	46
23	8	59	17	29	41					21	24	84	221	31	19	2	46
23	8	59	17	29	41					21	24	84	221	31	19	2	51
23	8	59	17	29	41					21	24	84	221	31	19	2	51
23	8	59	17	29	41					21	24	84	221	31	19	2	51
23	8	59	17	29	41					21	24	84	247	31	19	2	51
23	8	59	26	29	41					21	24	84	247	31	19	2	51
23	8	59	26	29	41					21	24	84	247	31	19	2	51
23	8	59	26	29	41					21	24	84	247	31	19	2	51
23	8	59	26	29	41					21	24	84	247	31	19	2	51
23	8	59	26	29	41					21	24	84	247	31	19	2	51
23	8	59	26	29	41					21	24	84	247	31	19	2	51
23	8	59	26	29	41					21	24	84	247	31	74	2	51
23	8	59	26	29	110					21	24	84	247	31	74	2	51
23	8	59	26	29	110					21	24	84	247	31	74	2	51
23	8	59	26	29	110					21	24	84	247	31	74	2	51
23	8	59	26	29	110					21	28	84	247	31	74	2	51
23	8	59	26	29	110					21	28	84	247	31	74	2	51
23	8	59	26	29	110					21	28	84	247	31	74	2	51
23	8	59	26	29	110					21	28	84	247	31	74	2	51
23	8	59	26	29	110					21	28	84	247	31	74	2	51
23	8	59	26	29	110					21	28	84	247	31	74	2	51
23	8	59	26	29	110					21	28	84	247	31	74	2	51
23	8	59	29	29	110					21	28	84	247	31	74	2	51
23	8	59	29	29	110					21	28	84	247	31	74	2	51
23	8	59	29	29	110					21	28	84	247	31	74	2	51
23	8	59	29	29	110					21	28	84	247	31	74	2	51
23	8	59	29	29	110					21	28	84	247	31	74	2	51
23	8	59	29	29	110					21	28	84	294	31	74	2	51
23	17	59	29	29	110					21	28	84	294	31	74	2	51
23	17	59	29	29	110					26	28	84	294	31	74	2	51
23	17	59	29	29	110					26	28	84	294	31	74	2	51
23	17	59	29	29	110					26	28	84	294	31	74	2	51
23	17	59	29	29	110					26	28	84	294	31	74	2	51
23	17	59	29	29	110					26	28	84	294	31	74	2	51
23	17	59	29	29	110					26	28	84	294	31	74	2	51
23	17	59	29	29	110					26	28	84	294	31	74	2	51
23	17	59	29	29	110					26	28	84	294	31	74	2	51
23	17	59	29	29	110					26	28	84	294	31	74	2	51
23	17	59	29	29	110					26	28	84	294	31	74	2	51
23	17	59	29	29	110					26	28	84	294	31	74	5	51
23	17	59	29	29	110					26	28	84	294	31	74	5	51
23	17	59	29	29	110					26	28	84	294	31	74	5	51
23	17	59	29	29	110					26	28	84	294	31	74	5	51
23	17	59	29	29	110					26	28	84	294	31	74	5	51
23	17	59	29	29	110					26	28	84	294	31	74	5	51
23	17	59	29	29	110					26	28	84	294	31	74	5	51
23	17	59	29	29	110					26	28	84	294	31	74	5	51
23	17	59	29	29	110					26	28	84	294	31	74	5	51
23	17	59	29	29	110					26	28	84	294	31	74	5	51
23	17	59	29	29	110					26	28	84	294	31	74	5	51
23	17	92	29	29	110					26	28	84	294	31	74	5	69
23	17	92	29	29	110					26	28	84	294	31	74	5	69
23	17	92	29	29	110					26	28	84	294	31	74	5	69
23	17	92	29	72	134					26	28	84	294	31	74	5	69
23	17	92	29	72	134					26	28	84	294	31	74	5	69
23	17	92	29	72	134					26	28	84	294	31	74	5	69
23	17	92	29	72	134					26	28	84	294	31	74	5	69
23	17	92	29	72	134					26	28	84	294	31	74	5	69
23	17	92	29	72	134					26	28	84	294	31	74	5	69
23	17	92	29	72	134					26	28	84	294	31	74	5	69
23	17	92	29	72	134					26	28	84	294	31	74	5	69
23	17	92	29	72	134					26	28	84	294	31	74	5	69
23	17	92	29	72	134					26	28	84	294	31	74	5	69
23	17	92	29	72	134					26	28	84	294	31	74	5	69
23	17	92	29	72	134					26	28	84	294	31	74	5	69
23	17	92	29	72	134					26	28	84	294	31	74	5	69
23	17	92	29	72	134					26	28	84	294	31	74	5	69
31	17	92	34	72	134					26	32	84	294	31	74	5	69
31	17	92	34	72	134					26	32	84	294	31	74	5	69
31	17	92	34	72	134					26	32	84	294	31	74	5	69
31	17	92	34	72	134					26	32	84	294	31	74	5	69
31	17	92	34	72	134					26	32	84	294	31	74	5	69
31	17	142	34	72	134					26	32	84	294	31	74	5	69
31	17	142	34	72	134					26	32	84	294	31	74	5	69
31	17	142	34	72	134					26	32	84	294	31	74	5	69
31	17	142	34	72	134					26	32	84	294	31	74	5	69
31	17	142	34	72	134					26	32	84	294	31	74	5	69
31	17	142	34	72	134					26	32	84	294	31	74	5	69
31	17	142	34	72	134					26	32	84	294	31	74	5	69
31	17	142	34	72	134					26	32	84	294	31	74	5	69
31	17	142	34	72	134					26	32	84	294	31	74	5	69
31	17	142	34	72	134					26	32	84	294	31	74	5	69
31	17	142	34	72	134					26	32	84	294	31	74	5	69
31	17	142	34	72	134					26	32	84	294	31	74	5	69
31	17	148	34	72	134					26	32	84	294	31	74	5	69
31	17	148	34	72	134					26	32	84	294	31	74	5	69
31	17	148	34	72	134					26	32	84	294	31	74	5	69
31	17	148	34	72	134					26	32	84	294	31	74	5	69
31	17	148	34	72	134					26	32	84	294	31	74	5	69
31	17	148	34	72	134					26	32	84	294	31	74	5	69
31	17	148	34	72	134					26	32	84	294	31	74	5	69
31	17	148	34	72	134					26	32	84	294	31	74	5	69
31	17	148	34	72	134					26	32	84	294	31	74	5	69
31	17	148	34	72	134					26	32	84	294	31	74	5	69
31	17	148	34	72	134					26	32	84	294	31	74	5	69
31	17	148	34	72	134					26	32	84	294	31	74	5	69
31	17	148	34	72	134					26	32	84	294	31	74	5	69
31	17	148	38	72	134					26	32	84	294	31	74	5	69
31	17	148	38	76	134					26	32	84	294	31	74	5	69
31	17	148	38	76	134					26	32	84	294	31	74	5	82
31	17	148	38	76	134					26	32	84	294	31	74	5	82
39	27	158	38	76	134					26	32	84	294	31	74	5	82
39	27	158	38	76	134					26	32	84	294	31	74	5	82
39	27	158	38	76	134					26	32	84	294	31	74	5	82
39	27	158	38	76	134					26	32	84	294	31	74	5	82
39	27	158	38	76	134					26	32	84	294	31	74	5	82
39	27	158	38	76	134					26	32	84	294	31	74	5	82
39	27	158	38	76	134					26	32	84	294	31	74	5	82
39	27	158	38	76	134					26	32	84	294	31	74	5	82
39	27	158	38	76	134					26	32	84	294	31	74	5	82
39	27	158	38	76	134					26	32	84	294	31	74	5	82
39	27	158	38	76	134					26	32	84	294	31	74	5	82
39	27	158	38	76	134					26	32	84	294	31	74	5	82
39	27	158	38	76	134					26	32	84	294	31	74	5	82
39	27	158	38	76	134					26	32	84	294	31	74	5	82
39	27	158	38	76	134					26	32	84	294	31	74	5	82
39	27	159	38	76	134					26	32	84	294	31	74	5	82
39	27	159	38	76	134					26	32	84	294	41	74	5	82
39	27	159	38	76	134					26	32	84	294	41	74	5	82
39	27	159	38	76	151					26	32	84	294	41	74	5	82
39	27	159	39	76	151					26	32	84	294	41	74	5	82
39	27	159	39	76	151					26	32	84	294	41	74	5	82
39	27	159	39	76	151					26	32	84	294	41	74	5	82
39	41	159	39	76	151					26	32	84	294	41	74	5	82
39	41	159	39	76	151					26	69	84	294	41	74	5	82
39	41	159	39	76	151					26	69	84	294	41	74	5	82
39	41	159	39	76	151					26	69	84	294	41	74	5	82
39	41	159	39	76	151					26	69	84	294	41	74	5	82
39	41	159	39	76	151					26	69	84	294	41	74	5	82
39	41	159	39	76	151					26	69	84	294	41	74	5	82
39	41	159	39	76	151					26	69	84	294	41	74	5	82
39	41	159	39	76	151					26	69	84	294	41	74	5	82
39	41	159	39	76	151					26	69	84	294	41	74	5	82
39	41	159	39	76	151					26	69	84	294	41	74	5	82
39	41	159	39	89	151					26	69	84	294	41	74	5	82
39	41	159	39	89	151					26	69	84	294	41	74	5	82
39	41	159	39	89	151					26	69	84	294	41	74	5	82
39	41	159	39	89	151					26	69	84	294	41	74	5	82
39	41	159	39	89	151					26	69	84	294	41	74	5	82
56	41	159	39	89	151					26	69	84	294	41	74	5	82
56	41	159	39	89	151					26	69	84	294	41	74	5	82
56	41	159	39	89	151					26	69	84	294	41	74	5	82
56	41	159	39	89	151					26	69	84	294	41	74	5	82
56	41	159	39	89	151					26	69	84	294	41	74	5	101
56	41	159	39	89	151					37	69	84	294	41	74	5	101
56	41	159	39	89	151					37	69	84	294	41	74	5	101
56	41	159	39	89	151					37	69	84	294	41	74	5	101
56	41	159	39	89	151					37	69	84	294	41	74	5	101
56	41	159	39	89	151					37	69	84	294	41	74	5	101
56	41	159	39	89	151					37	69	84	294	41	74	5	101
56	41	159	39	89	151					37	69	84	294	41	74	5	101
56	41	159	39	89	151					37	69	84	294	41	74	5	101
56	41	159	39	89	151					37	69	84	294	41	74	5	101
56	41	159	39	89	151					37	69	84	294	41	74	11	101
56	41	159	39	89	151					37	69	84	294	41	74	11	101
56	41	159	39	89	151					37	69	84	294	41	74	11	101
56	41	159	39	89	151					37	69	84	294	41	74	11	101
56	41	159	39	89	151					37	69	84	294	41	74	11	101
56	41	159	39	89	151					37	69	84	294	41	74	11	101
56	41	159	39	89	151					37	69	84	294	41	74	11	101
56	44	159	39	89	151					37	69	84	294	41	74	11	101
56	44	159	39	89	151					37	69	84	294	41	74	11	101
56	44	159	39	89	151					37	69	84	294	41	74	11	101
56	44	159	39	89	151					37	69	84	294	41	74	11	101
56	44	159	39	89	151					37	69	84	294	41	74	11	101
56	44	159	39	93	151					37	69	84	294	41	74	11	101
56	44	159	39	93	151					37	69	84	294	41	74	11	101
56	44	159	39	93	151					37	69	84	294	41	74	11	101
56	44	159	39	93	151					37	69	84	294	41	74	11	101
56	44	159	39	93	151					37	69	84	294	41	74	11	101
56	44	159	39	93	151					37	69	84	294	41	74	11	101
56	44	159	39	93	151					37	69	84	294	41	74	11	101
56	44	159	39	93	151					37	69	84	294	41	74	11	101
56	44	159	39	93	151					37	69	84	294	41	74	11	101
56	44	159	39	93	151					37	69	84	294	41	74	11	101
56	44	159	39	93	151					37	69	84	294	41	74	11	101
56	44	159	39	93	151					37	69	84	294	41	74	11	101
60	44	159	39	93	151					37	69	84	294	41	74	11	101
60	44	159	39	93	151					37	69	84	294	41	74	11	101
60	44	159	39	93	151					37	69	84	294	41	74	11	101
60	44	159	39	93	151					37	69	84	294	41	74	11	101
60	44	159	39	93	151					37	69	84	294	41	74	11	101
60	44	159	39	93	151					37	69	84	294	41	74	11	101
60	44	159	39	93	151					37	69	84	294	41	74	11	101
60	44	159	39	93	151					37	69	84	467	41	74	11	101
60	44	159	39	93	151					37	69	84	467	41	74	11	101
60	44	159	39	93	151					37	69	84	467	41	74	11	101
60	44	159	39	93	151					37	69	84	467	41	74	11	101
60	44	159	39	93	151					37	69	84	467	41	74	11	101
60	44	159	39	93	151					37	69	84	467	41	74	11	101
60	44	159	39	93	151					37	69	84	467	41	74	11	101
60	44	159	39	93	151					37	69	84	467	41	74	11	101
60	44	159	39	93	151					37	69	84	467	41	74	11	101
60	44	159	39	93	151					37	69	84	467	41	74	11	101
60	44	159	39	93	151					37	69	84	467	41	74	11	101
60	44	159	39	99	151					37	69	84	467	41	74	11	101
60	44	159	39	99	151					37	69	84	467	41	74	11	101
60	44	159	39	99	151					37	69	84	467	41	74	11	101
60	44	159	39	99	151					37	69	84	467	41	74	11	101
60	44	159	39	99	151					37	69	84	467	41	74	11	101
60	67	159	39	99	151					37	69	84	467	41	74	11	101
60	67	159	39	99	151					37	69	84	467	41	74	11	101
60	67	159	39	99	151					37	69	84	467	41	74	11	101
60	67	159	39	99	151					37	69	84	467	41	74	11	101
60	67	159	39	99	151					37	69	84	467	41	74	11	110
60	67	159	39	99	151					37	69	84	467	41	74	11	110
60	67	159	39	99	151					37	69	84	467	41	74	11	110
60	67	159	39	99	151					37	69	84	467	41	74	11	110
60	67	159	39	99	151					37	69	84	467	41	74	11	110
60	67	159	39	99	151					37	69	84	467	41	74	11	110
60	67	159	39	99	151					37	69	84	467	41	74	11	110
60	67	159	39	99	151					37	69	84	467	41	74	11	110
60	67	159	39	99	151					37	69	84	467	41	74	11	110
60	67	159	39	99	151					37	69	84	467	41	74	11	110
60	67	159	39	99	151					37	69	84	467	41	74	11	110
60	67	159	39	99	151					37	69	84	467	41	74	11	110
60	67	159	39	99	151					37	69	84	467	41	74	11	110
60	67	159	39	99	151					37	69	84	467	41	74	11	110
60	67	159	39	99	151					37	69	84	467	41	74	11	110
60	67	159	39	99	151					37	69	84	467	41	74	11	110
60	67	159	39	99	151					37	69	84	467	41	74	11	110
60	67	159	39	99	151					37	69	84	467	41	74	11	110
60	67	159	39	99	151					37	90	84	467	41	74	11	110
60	67	159	39	99	151					37	90	84	467	41	74	11	110
60	67	159	39	99	151					37	90	84	467	41	74	11	110
60	67	159	39	99	151					37	90	84	467	41	74	11	110
60	67	159	39	99	151					37	90	84	467	41	74	11	110
60	67	159	39	99	151					37	90	84	467	41	74	11	110
60	67	159	39	99	151					37	90	84	467	41	74	11	110
60	67	159	39	99	151					37	90	84	467	41	74	11	110
60	67	159	39	99	151					37	90	84	467	41	74	11	110
60	67	159	39	99	151					37	90	84	467	41	74	11	110
60	67	159	39	99	151					37	90	84	467	41	74	11	110
60	67	159	39	99	151					37	90	84	467	41	74	11	110
60	67	159	39	99	151					37	90	84	467	41	74	11	110
60	67	159	39	99	151					37	90	84	467	41	74	11	110
60	67	159	39	99	151					37	90	84	467	41	74	11	110
60	67	159	46	99	151					37	90	84	467	41	74	11	110
60	67	159	46	99	151					37	90	84	467	41	74	11	110
60	67	159	46	99	151					37	90	84	467	41	74	11	110
60	67	159	46	99	151					37	90	84	467	41	74	11	110
60	67	159	46	99	151					37	90	84	467	41	74	11	110
60	67	159	46	99	151					37	90	84	467	41	74	11	110
60	67	159	46	99	151					37	90	84	467	41	74	11	110
60	67	159	46	99	151					37	90	84	467	41	74	11	110
60	67	159	46	99	151					37	90	84	467	41	74	11	123
60	67	159	46	99	151					37	90	84	467	41	74	11	123
60	67	159	46	99	151					37	90	84	467	41	74	11	123
60	67	159	46	99	151					37	90	84	467	41	74	11	123
73	67	159	46	99	151					37	90	84	467	41	74	11	123
73	67	159	46	99	151					37	90	84	467	41	74	11	123
73	67	159	46	99	151					37	90	84	467	41	74	11	123
73	67	159	46	99	151					37	90	84	467	41	74	11	123
73	67	159	46	99	151					37	90	84	467	41	74	11	123
73	67	159	46	99	151					37	90	84	467	41	74	11	123
73	67	159	46	99	151					37	90	84	467	41	74	11	123
73	67	159	46	99	151					37	90	84	467	48	74	11	123
73	67	159	46	99	151					37	90	84	467	48	74	11	123
73	67	159	46	99	151					37	90	84	512	48	74	11	123
73	67	159	46	99	151					37	90	84	512	48	74	11	123
73	67	159	46	99	151					37	90	84	512	48	74	11	123
73	67	159	46	99	151					37	90	84	512	48	74	11	123
73	67	159	46	99	151					37	90	84	512	48	74	11	123
73	67	159	46	99	151					37	90	84	512	48	74	11	123
73	67	159	46	99	151					37	90	84	512	48	74	11	123
73	67	159	46	99	151					37	90	84	512	48	74	11	123
73	67	159	46	99	151					37	90	84	512	48	74	11	123
73	67	159	46	99	151					37	90	84	512	48	74	11	123
73	67	159	86	99	151					37	90	84	512	48	74	11	123
73	67	159	86	99	151					37	90	84	512	48	74	11	123
73	67	159	86	99	151					37	90	84	512	48	74	11	123
73	67	159	86	99	153					37	90	84	512	48	74	11	123
73	67	159	86	99	153					37	90	84	512	48	74	11	123
73	67	159	86	99	153					37	90	84	512	48	74	11	123
73	67	159	86	99	153					37	90	84	512	48	74	11	123
73	67	159	86	99	153					37	90	84	512	48	74	11	123
73	67	159	86	99	153					37	90	84	512	48	74	11	123
73	67	159	86	99	153					37	90	84	512	48	74	11	123
73	67	159	86	99	153					37	90	84	512	48	74	11	123
73	67	159	86	99	153					37	90	84	512	48	74	11	123
73	67	159	86	99	153					37	90	84	512	48	74	11	123
73	67	159	86	99	153					37	90	84	512	48	74	11	123
73	67	159	86	99	153					37	90	84	512	48	74	11	123
73	67	159	86	99	153					37	90	84	512	48	74	11	123
73	67	159	86	99	153					37	90	84	512	48	74	11	123
73	67	159	86	99	153					37	90	84	512	48	74	11	123
73	67	159	86	99	153					37	90	84	512	48	74	11	123
73	67	159	86	99	153					37	90	84	512	48	74	11	123
73	67	159	86	99	153					37	90	84	512	48	74	11	123
73	67	159	86	99	153					37	90	84	512	48	74	11	123
73	67	159	86	99	153					45	90	84	512	48	74	11	123
73	67	159	86	99	153					45	90	84	512	48	74	11	123
73	67	159	86	99	153					45	90	84	512	48	74	11	123
73	67	159	86	99	153					45	90	84	512	48	74	11	123
73	67	159	86	99	153					45	90	84	512	48	74	11	123
73	67	159	86	99	153					45	90	84	512	48	74	11	123
73	67	159	86	99	153					45	90	84	512	48	74	11	123
73	67	159	86	99	153					45	90	84	512	48	74	11	123
73	67	159	86	99	153					45	90	84	512	48	74	11	123
73	67	159	86	99	153					45	90	84	512	48	74	11	123
73	67	159	86	99	153					45	90	84	512	48	74	11	123
73	67	159	86	99	153					45	90	84	512	48	74	11	123
73	67	159	86	99	153					45	90	84	512	48	74	11	123
73	67	159	86	101	153					45	90	84	512	48	74	11	123
73	67	159	86	101	153					45	90	84	512	48	74	11	123
73	67	159	86	101	153					45	90	84	512	48	74	11	123
73	67	159	86	101	153					45	90	84	512	48	74	11	123
73	67	159	86	101	153					45	90	84	512	48	74	11	123
73	67	159	86	101	153					45	90	84	512	48	74	11	123
73	67	159	86	101	153					45	90	84	512	48	74	11	123
73	67	159	86	101	168					45	90	84	512	48	74	11	123
73	67	159	86	101	168					45	90	84	512	48	74	11	123
73	67	159	86	101	168					45	90	84	512	48	74	11	123
73	67	159	86	101	168					45	90	84	512	48	74	11	123
73	67	159	86	101	168					45	90	84	512	48	74	11	123
73	67	159	86	101	168					45	90	84	512	48	74	11	123
73	67	159	86	101	168					45	90	84	512	48	74	11	123
73	67	159	86	101	168					45	90	84	512	48	74	11	123
73	67	159	86	101	168					45	90	84	512	48	74	11	123
73	67	159	86	101	168					45	90	84	512	48	74	11	123
79	67	159	86	101	168					45	90	84	512	48	74	11	123
79	67	159	86	101	168					45	90	84	512	48	74	11	123
79	67	159	86	101	168					45	90	84	512	48	74	11	123
79	67	159	86	101	168					45	90	84	512	48	74	11	123
79	67	159	86	101	168					45	90	84	512	48	74	11	123
79	67	159	86	101	168					45	90	84	512	48	74	11	123
79	67	159	86	101	168					45	90	84	512	48	74	11	123
79	67	159	86	101	168					45	90	84	512	48	74	11	123
79	67	159	86	101	168					45	90	84	512	48	74	11	123
79	67	159	86	101	168					45	90	84	512	48	74	11	123
79	67	159	86	101	168					45	90	84	512	48	74	11	123
79	67	159	86	101	168					45	90	84	512	48	74	11	123
79	67	159	86	101	168					45	90	84	512	48	74	11	123
79	67	159	86	101	168					45	90	84	512	48	74	11	123
79	67	159	86	101	168					45	90	84	512	48	74	11	123
79	67	159	86	101	168					45	90	84	512	48	74	11	123
79	67	159	86	101	168					45	90	84	512	48	74	11	123
79	67	159	86	101	168					45	90	84	512	48	74	11	123
79	67	159	86	101	168					45	90	84	512	48	74	11	123
79	67	159	86	101	168					45	90	84	512	48	74	11	123
79	67	159	86	101	168					45	90	84	512	48	74	11	123
79	77	159	86	101	168					45	90	84	512	48	74	11	123
79	77	159	86	101	168					45	90	84	512	48	74	11	123
79	77	159	86	101	168					45	90	84	512	48	74	11	123
79	77	159	86	101	168					45	90	84	512	48	74	11	123
79	77	159	86	101	168					45	90	84	512	48	74	11	123
79	77	159	86	101	168					45	90	84	512	48	74	11	123
79	77	159	86	101	168					45	90	84	512	48	74	11	123
79	77	159	86	101	168					45	90	84	512	48	74	11	123
79	77	159	86	101	168					45	90	84	512	48	74	11	123
79	77	159	86	101	168					45	90	84	512	48	74	11	123
79	77	159	86	101	168					45	90	84	512	48	74	11	123
79	77	159	86	101	168					45	90	84	512	48	74	11	123
79	77	159	86	101	168					45	90	84	512	48	74	11	123
79	77	159	86	101	168					45	90	84	512	48	74	11	123
79	77	159	86	101	168					45	90	84	512	48	74	11	123
79	77	159	86	101	168					45	90	84	512	48	74	11	123
79	77	159	86	101	168					45	90	84	512	48	74	11	123
79	77	159	86	101	168					45	90	84	512	48	74	11	123
79	77	159	86	101	168					45	90	84	512	48	74	11	123
79	77	159	86	101	168					45	90	84	512	48	74	11	123
79	77	159	86	101	168					45	90	84	512	48	74	11	123
79	77	159	86	101	168					45	90	84	512	48	74	11	123
79	77	159	86	101	168					45	90	84	512	48	74	11	123
79	77	159	86	101	168					45	90	84	512	48	74	11	123
79	77	159	86	101	168					45	90	84	512	48	74	11	123
79	77	159	86	101	168					45	90	84	512	48	74	11	123
79	77	159	86	101	168					45	90	84	512	54	74	11	123
79	77	159	86	101	168					45	90	84	512	54	74	11	123
79	77	159	86	101	168					45	90	84	512	54	74	11	123
79	77	159	86	101	168					45	90	84	512	54	74	11	123
79	77	159	86	101	168					45	90	84	512	54	74	11	123
79	77	159	86	101	168					45	90	84	512	54	74	11	123
79	77	159	86	101	168					45	90	84	512	54	74	11	123
79	77	159	86	101	168					45	90	84	512	54	74	11	123
79	77	159	86	101	168					45	90	84	512	54	74	11	123
79	77	159	86	101	168					45	90	84	512	54	74	11	123
79	77	159	86	101	168					45	90	84	512	54	74	11	123
79	77	159	86	101	168					45	90	84	512	54	74	11	123
79	77	159	86	101	168					45	90	84	512	54	74	11	123
79	77	159	86	101	168					45	90	84	512	54	74	11	123
79	77	159	86	101	168					45	90	84	512	54	74	11	123
79	77	159	86	101	168					45	90	84	512	54	74	11	123
79	77	159	86	101	168					45	90	84	512	54	74	11	123
79	77	159	86	101	168					45	90	84	512	54	74	11	123
79	77	159	86	101	168					45	90	84	512	54	74	11	123
79	77	159	86	101	168					45	90	84	512	54	74	11	123
79	103	159	86	101	168					45	90	84	512	54	74	11	123
79	103	159	86	101	168					45	90	84	512	54	74	11	123
79	103	159	86	101	168					45	90	84	512	54	74	11	123
79	103	159	86	101	168					45	90	84	512	54	74	11	123
79	103	159	86	101	168					45	90	84	512	54	74	11	123
79	103	159	86	101	168					45	90	84	512	54	74	11	123
79	103	159	86	101	168					45	90	84	512	54	74	11	123
79	103	159	86	101	168					45	90	84	512	54	74	11	123
79	103	159	86	101	168					45	90	84	512	54	74	11	123
79	103	159	86	101	168					45	90	84	512	54	74	11	123
79	103	159	86	101	168					45	90	84	512	54	74	11	123
79	103	159	86	101	168					45	90	84	512	54	74	11	123
79	103	159	86	101	168					45	90	84	512	54	74	11	123
79	103	159	86	101	168					45	90	84	512	54	74	11	123
79	103	159	86	101	168					45	90	84	512	54	74	11	123
79	103	159	86	101	168					45	90	84	512	54	74	11	123
79	103	159	86	101	168					45	90	84	512	54	74	11	123
79	103	159	86	101	168					45	90	84	512	54	74	11	123
79	103	159	86	101	168					45	90	84	512	54	74	11	123
79	103	159	86	101	168					45	90	84	512	54	74	11	123
79	103	159	86	101	168					45	90	84	512	54	74	11	123
79	103	159	86	101	168					45	90	84	512	54	74	11	123
79	103	159	86	101	168					45	90	84	512	54	74	11	123
79	103	159	86	101	168					45	90	84	512	54	74	11	123
79	103	159	86	101	168					45	90	84	512	54	74	11	123
79	103	159	86	101	168					45	90	84	512	54	74	11	123
79	103	159	86	101	168					45	90	84	512	54	74	11	123
79	103	159	86	101	168					45	90	84	512	54	74	11	123
79	103	159	86	101	168					45	90	84	512	54	74	11	123
79	103	159	86	101	168					45	90	84	512	54	74	11	123
79	103	159	86	101	168					45	90	84	512	54	74	11	123
79	103	159	86	101	168					45	90	84	512	54	74	11	123
79	103	159	86	101	168					45	90	84	512	54	74	11	123
79	103	159	86	101	168					45	90	84	512	54	74	11	123
79	103	159	86	101	168					45	90	84	512	54	74	11	123
79	103	159	86	101	168					45	90	84	512	54	74	11	123
79	103	159	86	101	168					45	90	84	512	54	74	11	157
79	103	159	86	101	168					45	90	84	512	54	74	14	157
79	103	159	86	101	168					45	90	84	512	54	74	14	157
79	103	159	86	101	168					45	90	84	512	54	74	14	157
79	103	159	86	101	168					45	90	84	512	54	74	14	157
79	103	159	86	101	168					45	90	84	512	54	74	14	157
79	103	159	86	101	168					45	90	84	512	54	74	14	157
79	103	159	86	101	168					45	90	84	512	54	74	14	157
79	103	159	86	101	168					45	90	84	512	54	74	14	157
79	103	159	86	101	168					45	90	84	512	54	74	14	157
79	103	159	86	101	168					45	90	84	512	54	74	14	157
79	103	159	86	101	168					45	90	84	512	54	74	14	157
79	103	159	86	101	168					45	90	84	512	54	74	14	157
79	103	159	86	101	168					45	90	84	512	54	74	14	157
79	103	159	86	101	168					45	104	84	512	54	74	14	157
79	103	159	86	101	168					45	104	84	512	54	74	14	157
79	103	159	86	101	168					45	104	84	512	54	74	14	157
79	103	159	86	101	168					45	104	84	512	54	74	14	157
79	103	159	86	101	168					45	104	84	512	54	74	14	157
79	103	159	86	101	168					45	104	84	512	54	74	14	157
79	103	159	86	101	168					45	104	84	512	54	74	14	157
79	103	159	86	101	168					45	104	84	512	54	74	14	157
79	103	159	86	101	168					45	104	84	512	54	74	14	157
79	103	159	86	101	168					45	104	84	512	54	74	14	157
79	103	159	86	101	168					45	104	84	512	54	74	14	157
79	103	159	86	101	168					45	104	84	550	54	74	14	157
79	103	159	86	101	168					45	104	84	550	54	74	14	157
79	103	159	86	101	168					45	104	84	550	54	74	14	157
79	103	159	86	101	168					45	104	84	550	54	74	14	157
79	103	159	86	101	168					45	104	84	550	54	74	14	157
79	140	159	86	101	168					45	104	84	550	54	74	14	157
79	140	159	86	101	168					48	104	84	550	54	74	14	157
79	140	159	86	101	168					48	104	84	550	54	74	14	157
79	140	159	86	101	182					48	104	84	550	54	74	14	157
79	140	159	86	101	182					48	104	84	550	54	74	14	157
79	140	159	86	101	182					48	104	84	550	54	74	14	157
79	140	159	86	101	182					48	104	84	550	54	74	14	157
79	140	159	86	101	182					48	104	84	550	54	74	14	157
79	140	159	86	101	182					48	104	84	550	54	74	14	157
79	140	159	86	101	182					48	104	84	550	54	74	14	157
79	140	159	86	101	182					48	104	84	550	54	74	14	157
79	140	159	86	101	182					48	104	84	550	54	74	14	157
79	140	159	86	101	182					48	104	84	550	54	74	14	157
79	140	159	86	101	182					48	104	84	550	54	74	14	157
79	140	159	86	101	182					48	104	84	550	54	74	14	157
79	140	159	86	101	182					48	104	84	550	54	74	14	157
79	140	159	86	101	182					48	104	84	550	54	74	14	157
79	140	159	86	101	182					48	104	84	550	54	74	68	157
79	140	159	86	101	182					48	104	84	550	54	74	68	157
79	140	159	86	101	182					48	104	84	550	54	74	68	157
79	140	159	86	101	182					48	104	84	550	54	74	68	157
79	140	159	86	101	182					48	104	84	550	54	74	68	157
79	140	159	86	101	182					48	104	84	550	54	74	68	157
79	140	159	86	101	182					48	104	84	550	54	74	68	157
79	140	159	86	101	182					48	104	84	550	54	74	68	157
79	140	159	86	101	182					48	104	84	550	54	74	68	157
79	140	159	86	101	182					48	104	84	550	54	74	68	157
79	140	159	86	101	182					48	104	84	550	54	74	68	157
79	140	159	86	101	182					48	104	84	550	54	74	68	157
79	140	159	86	101	182					48	104	84	550	54	74	68	157
79	140	159	86	101	182					48	104	84	550	54	74	68	157
79	140	159	86	101	182					48	104	84	550	54	74	68	157
79	140	159	86	101	182					48	104	84	550	54	74	68	157
79	140	159	86	101	182					48	104	84	550	54	74	68	157
79	140	159	86	101	182					48	104	84	550	54	74	68	157
79	140	159	86	101	182					48	104	84	550	54	74	68	157
79	140	159	86	101	182					48	104	84	550	54	74	68	157
79	140	159	86	101	182					48	104	84	550	54	74	68	157
79	140	159	86	101	182					48	104	84	550	54	74	68	157
79	140	159	86	101	182					48	104	84	550	54	74	68	157
79	140	159	86	101	182					48	104	84	550	54	74	68	157
79	140	159	86	101	182					48	104	84	550	54	74	68	157
79	140	159	86	101	182					48	104	84	550	54	74	68	157
79	140	159	86	101	182					48	104	84	550	54	74	68	157
79	140	159	86	101	182					48	104	84	550	54	74	68	157
79	140	159	86	101	182					48	104	84	550	54	74	68	157
79	140	159	86	101	182					48	104	84	550	54	74	68	157
79	140	159	86	101	182					48	104	84	550	54	74	68	157
79	140	159	86	101	182					48	104	84	550	54	74	68	157
79	140	159	86	101	182					48	104	84	550	54	74	68	157
79	140	159	86	101	182					48	104	84	550	54	74	68	157
79	140	159	86	101	182					48	104	84	550	54	74	68	157
79	140	159	86	101	182					48	104	84	550	54	74	68	157
79	140	159	86	101	182					48	104	84	550	54	74	68	157
79	140	159	86	101	182					48	104	84	550	54	74	68	157
79	140	159	86	101	182					48	104	84	550	54	74	68	157
79	140	159	86	101	182					48	104	84	550	54	74	68	157
79	140	159	86	101	182					48	104	84	550	54	74	68	157
79	140	159	86	101	182					48	104	84	550	54	74	68	157
79	140	159	86	101	182					48	104	84	550	54	74	68	157
79	140	159	86	101	182					48	104	84	550	54	74	68	157
79	140	159	86	101	182					48	104	84	550	54	74	68	157
79	140	159	86	101	182					48	104	84	550	54	74	68	157
79	140	159	86	101	182					48	104	84	550	54	74	68	157
79	140	159	86	101	182					48	104	84	550	54	74	68	157
79	140	159	86	101	182					48	104	84	550	54	74	68	157
79	140	159	86	101	182					48	104	84	550	54	74	68	157
79	140	159	86	101	182					48	104	84	550	54	74	68	157
79	140	159	86	101	182					48	104	84	550	54	74	68	157
79	140	159	86	101	182					48	104	84	550	54	74	68	157
79	140	159	86	101	182					48	104	84	550	54	74	68	157
79	140	159	86	101	182					48	104	84	550	54	74	68	157
79	140	159	86	101	182					48	104	84	550	54	74	68	157
79	140	159	86	101	182					48	104	84	550	54	74	68	157
79	140	159	86	101	182					48	104	84	550	54	74	68	157
79	140	159	86	101	182					57	104	84	550	54	74	68	157
79	140	159	86	101	182					57	104	84	550	54	74	68	157
79	140	159	86	101	182					57	104	84	550	54	74	68	157
79	140	159	86	101	182					57	104	84	550	54	74	68	157
79	140	159	101	101	182					57	104	84	550	54	74	68	157
79	140	159	101	101	182					57	104	84	550	54	74	68	157
79	140	159	101	101	182					57	104	84	550	54	74	68	157
79	140	159	101	101	182					57	104	84	550	54	74	68	157
79	140	159	101	101	182					57	104	84	550	54	74	68	157
79	140	159	101	101	182					57	104	84	550	54	74	68	157
79	140	159	101	101	182					57	104	84	550	54	74	68	157
79	140	159	101	101	182					57	104	84	550	54	74	68	157
81	140	159	101	101	182					57	104	84	550	54	74	68	157
81	140	159	101	101	182					57	104	84	550	54	74	68	157
81	140	159	101	101	182					57	104	84	550	54	74	68	157
81	140	159	101	101	182					57	104	84	550	54	74	68	157
81	140	159	101	101	182					57	104	84	550	54	74	68	157
81	140	159	101	101	182					57	104	84	550	54	74	68	157
81	140	159	101	101	182					57	104	84	550	54	74	68	157
81	140	159	101	101	182					57	104	84	550	54	74	68	157
81	140	159	101	101	182					57	104	84	550	54	74	68	157
81	140	159	101	101	182					57	104	84	550	54	74	68	157
81	140	159	101	101	182					57	104	84	550	54	74	68	157
81	140	159	101	101	182					57	104	84	550	54	74	68	157
81	140	159	101	101	182					57	104	84	550	54	74	68	157
81	140	159	101	101	182					57	104	84	550	54	74	68	157
81	140	159	101	101	182					57	104	84	550	54	74	68	157
81	140	159	101	101	182					57	104	84	550	54	74	68	157
81	140	159	101	101	182					57	104	84	550	54	74	68	157
81	140	159	101	101	182					57	104	84	550	54	74	68	157
81	140	159	101	101	182					57	104	84	550	54	74	68	157
81	140	159	101	101	182					57	104	84	550	54	74	68	157
81	140	159	101	101	182					57	104	84	550	54	74	68	157
81	140	159	101	101	182					57	104	84	550	54	74	68	157
81	140	159	101	101	182					57	104	84	550	54	74	68	157
81	140	159	101	101	182					57	104	84	550	54	74	68	157
81	140	159	101	101	182					57	104	84	550	54	74	68	157
81	140	159	101	101	182					57	104	84	550	54	74	68	157
81	140	159	101	101	182					57	104	84	550	54	74	68	157
81	140	159	101	101	182					57	104	84	550	54	74	68	157
81	140	159	101	101	182					57	104	84	550	54	74	68	157
81	140	159	101	101	182					57	104	84	550	54	74	68	157
81	140	159	101	101	182					57	104	84	550	54	74	68	157
81	140	159	101	101	182					57	104	84	550	54	74	68	157
81	140	159	101	101	182					57	104	84	550	54	74	68	157
81	140	159	101	101	182					57	104	84	550	54	74	68	157
81	140	159	101	101	182					57	104	84	550	54	74	68	157
81	140	159	101	101	182					57	104	84	550	54	74	68	157
81	140	159	101	101	182					57	104	84	550	54	74	68	157
81	140	159	101	101	182					57	104	84	550	54	74	68	157
81	140	159	101	101	182					57	104	84	550	54	74	68	157
81	140	159	101	101	182					57	104	84	550	54	74	68	157
81	140	159	101	101	182					57	104	84	550	54	74	68	157
81	140	159	101	101	182					57	104	84	550	54	74	68	157
81	140	159	101	101	182					57	104	84	550	54	74	68	157
81	140	159	101	101	182					57	104	84	550	54	74	68	157
81	140	159	101	101	182					57	104	84	550	54	74	68	157
81	140	159	101	101	182					57	104	84	550	54	74	68	157
81	140	159	101	101	182					57	104	84	550	54	74	68	157
81	140	159	101	101	182					57	104	84	550	54	74	68	157
81	140	159	101	101	182					57	104	84	550	54	74	68	157
