# Supplementary material for: Metabolic sensing in AgRP neurons integrates homeostatic state with dopamine signalling in the striatum
Source: eLife journal article supplement (doi:10.7554/elife.72668), 2022-01-12
Supplement: fig3-data1 [file Fig3H.xlsx]

## Sheet: Sheet1
WT										KO
0	0	0	0	0	0					0	0	0	0	0	0	0	0
0	0	0	0	0	0					0	0	0	0	0	0	0	0
0	0	0	0	0	0					0	0	0	0	0	0	0	0
0	0	0	0	0	0					0	0	0	0	0	0	0	0
0	0	0	0	0	0					0	1	0	0	0	0	0	0
0	0	0	0	0	0					0	1	0	0	0	0	0	0
0	0	0	0	2	0					0	1	0	0	0	0	0	0
0	0	0	0	2	0					0	1	0	0	0	0	0	0
0	0	0	0	2	0					0	1	0	0	0	0	0	0
0	0	0	0	2	0					0	1	0	0	0	0	0	0
0	0	0	0	2	0					0	2	0	0	0	0	0	0
0	0	0	0	2	0					0	2	0	0	0	0	0	0
0	0	0	0	2	0					0	2	0	0	0	0	0	0
1	0	0	0	3	0					0	2	0	0	0	0	0	0
2	0	0	0	3	0					0	2	0	0	0	0	0	0
2	0	0	0	3	0					1	2	0	0	0	0	0	0
2	0	0	0	3	0					2	2	0	0	0	0	0	0
2	0	0	1	3	0					2	2	0	0	0	0	0	0
2	0	0	2	3	0					2	2	0	0	0	0	0	0
2	0	0	2	3	0					2	2	0	0	0	0	0	0
2	0	0	2	3	0					2	2	0	0	0	0	0	0
2	0	0	2	3	0					2	2	0	0	0	0	0	0
2	0	0	2	3	0					2	2	0	0	0	0	0	0
2	0	0	3	3	0					3	2	0	0	0	0	0	0
2	0	0	3	3	0					3	2	0	0	0	0	0	0
2	0	0	3	3	0					3	2	0	0	0	0	0	0
2	0	0	3	3	0					3	2	0	0	0	0	1	0
2	0	0	3	3	0					3	2	0	0	0	0	2	0
2	0	0	3	3	0					3	2	0	0	0	0	2	0
2	0	0	3	3	0					3	2	0	0	0	0	2	0
2	0	0	3	3	0					3	2	0	0	0	0	2	0
2	0	0	3	3	0					3	2	0	0	0	0	2	0
2	0	0	3	4	0					3	3	0	0	0	0	2	0
2	0	0	3	4	0					3	3	0	0	0	0	2	0
2	0	0	3	4	0					3	3	0	0	0	0	2	0
2	0	0	3	4	0					3	3	0	0	0	0	2	0
2	0	0	3	4	0					3	3	0	0	0	0	2	0
2	0	0	3	4	0					3	3	0	0	0	0	2	0
2	0	0	3	4	0					3	3	0	0	0	0	2	0
2	0	0	3	4	0					3	3	0	0	0	0	2	0
2	0	0	3	4	0					3	3	0	0	0	0	2	0
2	0	0	3	4	0					3	4	0	0	0	0	2	0
2	0	0	3	4	0					3	4	0	0	0	0	2	0
2	0	0	3	4	0					3	4	0	0	0	0	2	0
2	0	0	3	4	0					3	4	0	0	0	0	2	0
2	0	0	3	4	0					3	4	0	0	0	0	2	0
2	0	0	3	4	0					3	4	0	0	0	0	2	0
2	0	0	3	4	0					3	4	0	0	0	0	2	0
2	0	0	3	4	0					3	4	0	0	0	0	2	0
2	0	0	3	4	0					3	4	0	0	0	0	2	0
2	0	0	3	4	0					3	4	0	0	0	0	2	0
2	0	0	3	4	0					3	4	0	0	0	0	2	0
2	0	0	3	4	0					3	4	0	0	0	0	2	0
2	0	0	3	4	0					3	4	0	0	1	1	2	0
2	0	0	3	4	0					3	4	0	1	1	1	2	0
2	0	0	3	4	0					3	4	1	1	2	1	2	0
2	1	1	3	4	0					3	4	2	2	2	1	2	0
2	2	1	3	5	1					3	4	2	3	2	2	2	0
2	2	1	3	5	1					3	4	3	3	2	3	2	0
2	2	1	3	5	1					3	4	3	3	2	3	2	0
2	2	1	3	5	1					3	4	3	3	3	3	2	0
2	2	1	3	5	1					3	4	3	3	3	3	2	0
2	3	1	3	5	2					3	4	4	3	3	3	2	0
2	3	2	3	5	2					3	4	4	3	3	3	2	0
2	3	2	3	5	2					3	4	4	3	3	3	2	0
2	3	2	3	5	2					3	4	4	3	3	3	2	0
2	3	2	3	5	2					3	4	4	3	3	3	2	0
2	3	2	3	5	2					3	4	4	3	3	3	2	0
2	3	2	3	5	2					3	4	4	3	3	3	2	0
2	3	2	3	5	2					3	4	4	3	3	3	2	0
2	3	2	3	5	2					3	4	4	3	3	3	2	0
2	3	2	3	5	2					3	4	4	3	3	3	2	0
2	3	3	3	5	2					3	4	4	3	3	3	2	0
2	3	3	3	5	2					3	4	4	3	3	3	2	0
2	3	3	3	5	2					3	4	4	3	3	3	2	0
2	3	3	3	5	2					3	4	4	3	3	3	2	0
2	3	3	3	5	2					3	4	4	3	3	3	2	0
3	3	3	3	5	2					3	4	4	3	3	3	2	0
3	3	3	3	5	2					3	4	4	3	3	3	2	0
4	3	3	3	5	2					3	4	5	3	3	3	2	0
4	3	3	3	5	2					3	4	5	3	3	3	2	0
4	3	3	3	5	2					3	4	5	3	3	3	2	0
4	3	3	3	6	2					3	4	5	3	3	3	3	0
4	3	3	3	6	2					3	4	5	3	3	3	3	0
4	3	3	3	6	2					3	4	5	3	3	3	3	0
4	3	3	3	6	2					3	4	5	3	3	3	3	0
4	3	3	3	6	2					3	4	5	3	3	3	3	0
4	3	3	3	6	2					3	4	5	3	3	3	3	0
4	3	3	3	6	3					3	4	5	3	3	3	3	0
4	3	3	3	6	3					3	4	5	3	3	3	3	0
4	3	3	3	6	3					3	4	5	3	3	3	3	0
4	3	3	3	7	3					3	4	5	5	3	3	3	0
4	3	3	3	7	3					3	4	5	5	3	3	3	0
4	3	3	3	7	3					3	4	5	6	3	3	3	0
4	3	3	3	7	3					3	4	5	6	3	3	3	0
4	3	3	3	7	3					3	5	5	6	4	3	3	0
4	3	3	3	7	3					3	5	5	6	5	3	3	0
4	4	3	3	7	3					3	5	5	6	5	4	3	0
5	4	3	3	7	3					3	5	5	6	5	5	3	0
5	4	3	3	7	3					3	5	5	6	5	5	3	0
5	4	3	4	7	3					3	5	5	6	5	5	3	0
5	4	3	4	7	3					3	5	5	6	5	5	3	0
5	4	3	4	7	3					3	5	5	6	5	5	3	0
5	4	3	4	8	3					3	5	5	6	5	5	3	0
5	4	3	4	8	3					3	5	5	6	5	5	3	0
5	4	3	4	8	3					3	5	5	6	5	5	3	0
5	4	3	4	8	3					3	5	5	6	5	5	3	0
5	4	3	4	8	3					3	5	5	6	5	5	3	0
5	4	3	4	8	3					3	5	5	6	5	5	3	0
5	4	3	4	8	3					3	5	5	6	5	5	4	0
5	4	3	4	8	3					3	5	5	6	5	5	4	0
5	4	3	4	8	3					3	5	5	6	5	5	4	0
5	4	3	4	8	3					3	5	5	6	5	5	4	0
5	4	3	4	8	3					4	5	5	6	5	5	4	0
5	4	3	4	8	3					4	5	5	6	5	5	4	0
5	4	3	4	8	3					4	5	5	6	5	5	4	0
5	4	3	4	8	3					4	5	5	6	5	5	4	0
5	4	3	4	8	3					4	5	5	6	5	5	4	0
5	5	5	4	8	3					4	5	5	6	5	5	4	0
5	5	5	4	8	3					4	5	5	6	5	5	4	0
5	5	5	4	8	3					4	5	5	6	5	5	4	0
5	5	5	4	8	3					4	5	5	6	5	5	4	0
6	5	5	4	8	3					4	5	5	6	5	5	4	0
6	5	5	4	8	3					4	5	5	6	5	5	4	0
6	5	5	5	8	3					4	5	5	6	5	5	4	0
6	5	5	6	8	3					4	5	6	6	5	5	4	0
6	5	5	6	8	3					4	5	6	7	5	5	4	0
6	5	5	6	8	3					4	5	6	8	5	5	4	0
6	5	5	6	8	3					4	5	6	8	5	5	4	0
6	5	5	6	8	3					4	5	6	8	5	5	4	0
6	5	5	6	8	3					4	6	6	8	5	6	4	0
6	5	5	6	8	4					4	6	6	8	5	6	4	0
6	5	5	6	8	4					4	6	6	8	5	6	4	0
6	5	5	6	9	4					4	6	6	8	5	6	4	0
6	5	5	6	9	4					4	6	6	8	5	6	4	0
6	6	5	6	9	4					4	6	6	8	5	6	4	0
6	6	5	6	9	4					4	6	7	8	5	6	4	0
6	6	5	6	9	4					4	6	7	8	5	6	4	0
6	6	5	6	9	4					4	6	7	8	5	6	4	0
6	6	5	6	9	4					4	6	7	8	5	6	4	0
6	6	5	6	9	5					4	6	7	8	5	6	4	0
6	6	6	6	9	5					4	6	7	8	5	6	4	0
6	6	6	6	9	5					4	6	7	8	5	6	4	0
6	6	6	6	9	5					4	6	7	8	5	6	4	0
6	6	6	6	9	5					4	6	7	8	6	6	4	0
6	6	6	6	9	5					4	6	7	8	6	6	4	0
6	6	6	6	9	5					4	6	7	8	6	6	4	0
6	6	6	6	9	5					5	6	7	8	6	6	4	0
7	6	6	6	9	5					5	6	7	8	6	6	4	0
7	6	6	6	9	5					5	6	7	8	6	6	4	0
7	6	6	6	9	5					5	6	7	8	6	6	4	0
7	6	6	6	9	5					5	6	7	8	6	6	4	0
7	6	6	6	9	5					5	7	8	8	6	6	4	0
7	6	6	6	9	5					5	7	8	8	6	6	4	0
7	6	7	6	9	6					5	7	8	9	7	6	4	0
7	6	7	6	9	6					5	7	8	9	7	7	4	0
7	7	7	6	10	6					6	7	8	9	7	7	4	0
7	7	7	6	10	6					6	7	8	9	7	7	5	0
7	7	7	6	10	6					6	7	8	9	7	7	5	0
7	7	7	6	10	6					6	7	8	9	7	7	5	0
7	7	7	6	10	6					6	7	8	9	7	7	5	0
7	7	7	6	10	6					6	7	8	9	7	7	5	0
7	7	7	6	10	6					6	7	8	9	7	7	5	0
7	7	7	6	10	6					6	7	8	9	7	7	5	0
7	7	7	6	10	6					6	7	8	9	7	7	5	0
8	7	8	6	10	6					6	7	8	9	7	7	5	0
8	7	8	6	10	6					6	7	8	9	7	7	5	0
8	7	8	6	10	6					6	7	8	9	7	7	5	0
8	7	8	6	10	7					6	8	9	9	7	7	5	0
8	7	8	6	10	7					6	8	9	10	7	7	5	0
8	7	8	6	10	7					6	8	9	10	8	7	5	0
8	7	8	6	10	7					6	8	9	10	8	7	5	0
8	7	8	6	10	7					6	8	9	10	8	7	5	0
8	7	8	6	10	7					6	8	9	10	8	7	5	0
8	7	8	6	10	7					6	8	9	10	8	7	5	0
8	7	8	6	10	7					6	8	9	10	8	7	5	0
8	7	8	6	10	7					6	8	9	10	8	7	5	0
8	7	8	7	10	7					6	8	9	10	8	7	5	0
8	7	8	7	10	7					6	8	9	10	8	7	5	0
8	8	8	8	10	7					6	8	9	10	8	7	6	0
8	8	8	8	10	7					6	8	9	10	8	7	6	0
8	8	8	8	10	8					6	8	9	10	8	7	6	0
8	8	9	8	10	8					6	8	9	10	8	8	6	0
8	8	9	8	11	8					7	8	9	10	8	8	6	0
8	8	9	8	11	8					7	8	10	10	8	8	6	0
8	8	9	8	11	8					7	8	10	10	8	8	6	0
8	8	9	8	11	8					7	8	10	10	8	8	6	0
8	8	9	8	11	8					7	8	10	10	8	8	6	0
8	8	9	8	11	8					7	9	10	11	8	8	6	0
8	8	9	8	11	8					7	9	10	11	8	8	6	0
8	8	9	8	11	8					7	9	10	11	8	8	6	0
8	8	10	8	11	8					7	9	10	11	8	8	6	0
8	8	10	8	11	8					7	9	10	11	8	8	6	0
8	8	10	8	11	8					7	9	10	11	8	8	6	0
8	8	10	8	11	8					7	9	10	11	9	8	6	0
8	8	10	8	11	9					8	9	10	11	9	8	6	0
8	8	10	8	11	9					8	9	10	11	9	8	6	0
8	8	10	8	11	9					8	9	10	11	9	8	6	0
8	8	10	8	12	9					8	9	10	11	9	8	6	0
9	8	10	8	12	9					8	9	11	11	9	8	6	0
9	8	10	8	12	9					8	9	11	11	9	8	6	0
9	8	10	8	12	9					8	9	11	11	9	9	6	0
9	8	10	8	12	9					8	9	11	11	9	9	6	0
9	8	10	8	12	9					8	9	11	11	9	9	6	0
9	9	10	8	12	9					8	9	11	11	9	9	6	0
9	9	10	8	12	9					8	9	11	11	9	9	7	0
9	9	10	8	12	9					8	9	11	11	9	9	7	0
9	9	10	8	12	9					8	9	11	11	9	9	7	0
9	9	11	8	12	9					8	9	11	12	9	9	7	0
9	9	11	8	12	9					8	9	11	12	9	9	7	0
9	9	11	8	12	9					8	10	11	12	9	9	7	0
9	9	11	8	12	10					8	10	11	12	9	9	7	0
9	9	11	8	12	10					8	10	11	12	10	9	7	0
9	9	11	8	12	10					8	10	11	12	10	9	7	0
9	9	11	8	12	10					9	10	11	12	10	9	7	0
9	9	11	8	12	10					9	10	11	12	10	9	7	0
9	9	11	8	12	10					9	10	11	12	10	9	7	0
9	9	11	8	12	10					9	10	11	12	10	9	7	0
9	9	11	8	12	10					9	10	11	12	10	9	7	0
9	9	11	8	12	10					9	10	12	12	10	9	7	0
9	9	11	8	12	10					9	10	12	12	10	9	7	0
9	9	11	8	12	10					9	10	12	12	10	9	7	0
9	9	12	8	12	10					9	10	12	12	10	9	7	0
9	9	12	8	12	10					9	10	12	12	10	9	7	0
9	9	12	8	12	10					9	10	12	12	10	10	7	1
9	9	12	8	12	10					9	10	12	12	10	10	7	1
9	9	12	8	12	10					9	10	12	12	10	10	7	2
9	9	12	8	12	10					9	10	12	12	10	10	7	2
9	9	12	8	12	10					9	10	12	12	10	10	7	2
9	9	12	8	12	11					9	10	12	12	10	10	7	2
9	9	12	8	12	11					9	10	12	12	10	10	7	2
9	9	12	8	12	11					9	10	12	12	10	10	7	2
9	9	12	8	12	11					9	10	12	12	10	10	7	3
9	9	12	8	12	11					9	10	12	12	10	10	7	3
9	9	12	8	12	11					9	10	12	12	11	10	8	3
9	9	12	8	12	11					9	10	12	12	11	10	8	3
9	9	12	8	12	11					9	10	12	12	11	10	8	3
9	9	12	8	12	11					9	10	12	12	11	10	8	3
9	9	12	8	12	11					9	10	12	12	11	10	8	3
9	9	12	8	12	11					9	10	12	12	11	10	8	3
9	9	12	8	12	11					10	10	12	12	11	10	8	3
9	9	12	8	12	11					10	10	12	12	11	10	8	3
9	9	12	8	12	11					10	10	12	12	11	10	8	4
9	9	12	8	12	11					10	10	12	12	11	10	8	4
9	9	12	8	12	11					10	10	12	12	11	10	8	4
9	9	12	8	12	11					10	10	12	12	11	10	8	4
9	9	12	8	12	11					10	10	12	12	11	10	8	4
9	9	12	8	12	12					10	10	12	12	11	10	8	4
9	9	12	8	12	12					10	10	12	12	11	10	8	4
9	9	12	8	12	12					10	11	12	12	11	10	8	4
9	10	12	8	12	12					10	11	13	12	11	10	8	4
9	10	12	8	12	12					10	11	13	12	11	10	9	4
9	10	12	8	12	12					10	11	13	12	11	10	9	4
10	10	12	8	12	12					10	11	13	12	11	10	9	4
10	10	12	8	12	12					10	11	13	12	11	10	9	4
10	10	13	8	12	12					10	11	13	12	11	10	9	5
10	10	13	8	13	12					10	11	13	12	11	10	9	5
10	10	13	8	13	12					10	11	13	12	11	11	9	5
10	10	13	8	13	12					10	11	13	12	11	11	9	5
10	10	13	9	13	12					10	11	13	12	11	11	9	5
10	10	13	9	13	12					10	12	13	12	11	11	9	6
10	10	13	9	13	12					10	12	13	12	11	11	9	6
10	10	13	9	13	12					10	12	13	12	11	11	9	6
10	10	13	9	13	12					10	12	13	12	11	11	9	6
10	10	13	9	13	12					11	12	13	12	11	11	9	6
10	10	13	9	13	12					11	12	13	12	11	11	9	6
10	10	13	9	13	12					11	12	13	12	11	11	9	6
10	10	13	9	13	13					11	12	13	12	11	11	9	6
10	10	13	9	13	13					11	12	13	12	11	11	9	6
10	10	13	9	13	13					11	12	13	12	11	11	9	6
10	10	13	9	13	13					11	12	13	12	11	11	9	6
10	10	13	9	13	13					11	12	13	12	11	11	9	6
10	10	13	9	13	13					11	12	13	12	11	11	9	6
10	10	13	9	13	13					11	12	13	12	11	11	9	6
10	10	13	9	13	13					11	12	13	12	11	11	9	6
10	10	13	9	13	13					11	12	13	12	11	11	9	6
10	10	13	9	13	13					11	12	13	12	12	11	9	6
10	10	13	9	13	13					11	12	13	12	12	11	9	6
10	10	13	9	13	13					11	12	13	12	12	11	9	7
10	10	13	9	13	13					11	12	13	12	12	11	9	7
10	10	13	9	13	13					11	12	13	12	12	11	9	7
10	10	13	9	13	13					11	12	14	12	12	12	9	7
10	10	13	9	13	13					11	12	14	12	12	12	9	7
10	10	13	9	13	13					11	12	14	12	12	12	9	7
10	10	13	9	13	13					11	12	14	12	12	12	9	7
10	10	13	9	13	13					11	12	14	12	12	12	9	8
10	10	13	9	13	13					11	12	14	12	12	12	10	8
10	10	13	9	13	13					11	12	14	12	12	12	10	8
10	10	13	9	13	13					11	12	14	13	12	12	10	8
10	10	14	9	13	13					11	12	14	13	12	12	10	8
10	10	14	9	14	13					11	12	14	13	12	12	10	8
10	10	14	9	14	13					12	12	14	13	12	12	10	8
10	10	14	9	14	14					12	12	14	13	12	12	10	8
10	10	14	9	14	14					12	12	14	13	12	12	10	8
10	10	14	9	14	14					12	12	14	13	12	12	10	8
10	10	14	9	14	14					12	12	14	13	12	12	10	8
10	10	14	9	14	14					12	12	14	13	12	12	10	8
10	10	14	9	14	14					12	12	14	13	12	12	10	8
11	10	14	9	14	14					12	12	14	13	12	12	10	8
11	10	14	9	14	14					12	12	14	13	12	12	10	8
11	10	14	9	14	14					12	12	14	13	12	12	10	8
11	10	14	9	14	14					12	12	14	13	12	12	10	8
11	10	14	10	14	14					12	12	14	13	12	12	10	8
11	10	14	10	14	14					12	12	14	13	12	12	10	9
11	10	14	10	14	14					12	12	14	13	12	12	10	10
11	10	14	10	14	14					12	12	14	13	12	12	10	10
11	10	14	10	14	14					12	12	14	13	12	12	10	10
11	10	14	10	14	14					12	12	14	13	12	12	11	10
11	10	14	10	14	14					12	12	14	13	12	12	11	10
11	10	14	10	14	14					12	12	14	13	12	13	11	10
11	10	14	10	14	14					12	12	14	13	12	13	11	10
11	10	14	10	14	14					12	12	14	13	12	13	11	10
11	10	14	10	14	14					12	12	14	13	12	13	11	10
11	10	14	10	14	14					12	12	14	13	12	13	11	10
11	10	14	10	14	14					12	12	14	13	12	13	11	10
11	10	14	10	14	14					12	12	14	13	12	13	11	10
11	10	14	10	14	14					12	12	14	13	12	13	11	10
11	10	14	10	14	14					12	12	14	13	12	13	11	10
11	10	14	10	14	14					12	12	14	13	12	13	11	10
11	10	14	10	14	15					12	12	14	13	12	13	11	10
11	10	14	10	14	15					12	12	14	13	12	13	11	11
11	10	14	10	14	15					12	12	14	13	12	13	11	11
11	10	14	10	14	15					12	12	14	13	12	13	11	11
11	10	14	10	14	15					12	12	15	13	12	13	11	11
11	10	14	10	14	15					12	12	15	13	12	13	11	11
11	10	14	10	14	15					12	12	15	13	12	13	11	11
11	10	14	10	14	15					13	12	15	13	12	13	11	11
11	10	14	10	14	15					13	12	15	13	12	13	11	11
11	10	14	10	14	15					13	12	15	13	12	13	11	11
11	10	14	11	14	15					13	12	15	13	12	13	11	11
11	10	14	11	14	15					13	12	15	13	12	13	11	12
11	10	14	11	14	15					13	12	15	13	12	13	11	12
12	10	14	11	14	15					13	12	15	13	12	13	11	12
12	10	14	11	14	15					13	12	15	13	12	13	11	12
12	10	14	11	14	15					13	12	15	13	12	13	11	12
12	10	14	11	14	15					13	12	15	13	12	13	11	12
12	10	14	11	14	15					13	12	15	13	12	13	11	12
12	10	14	11	14	15					13	12	15	13	12	13	11	12
12	10	14	11	14	15					13	12	15	13	12	13	11	12
12	10	14	11	14	15					13	12	15	13	12	13	11	12
12	10	14	11	14	15					13	12	15	13	12	13	11	12
12	10	14	11	14	15					13	12	15	13	12	13	11	12
12	10	14	11	14	15					13	12	15	13	12	13	11	12
12	10	14	11	14	15					13	12	15	13	12	13	11	12
12	10	14	11	14	15					13	12	15	13	12	13	11	12
13	10	14	11	14	15					13	12	15	13	12	14	11	12
13	10	14	11	14	15					13	12	15	13	12	14	11	12
13	10	14	11	14	15					13	12	15	13	12	14	11	12
13	10	14	11	15	15					13	12	15	14	12	14	11	12
13	10	14	12	15	16					13	12	15	14	12	14	11	12
13	10	14	12	15	16					13	12	15	14	12	14	11	12
13	10	14	12	15	16					13	12	15	14	12	14	11	12
13	10	14	12	15	16					13	12	15	14	12	14	11	13
13	10	14	12	15	16					13	12	15	14	12	14	11	13
14	10	14	12	15	16					13	13	15	14	12	14	11	13
14	10	14	12	15	16					13	13	15	14	12	14	11	13
14	10	14	12	15	16					13	13	15	14	12	14	11	13
14	10	14	12	15	16					13	13	15	14	12	14	11	13
14	10	14	12	15	16					13	13	15	14	12	14	11	13
14	10	14	12	15	16					13	13	15	14	12	14	11	13
14	10	14	12	15	16					13	13	15	15	12	14	11	13
14	10	14	12	15	16					13	13	15	15	12	14	11	13
14	10	15	12	15	16					13	13	15	15	12	14	11	13
14	10	15	12	15	16					13	13	15	15	12	14	11	13
14	10	15	12	15	16					14	13	15	15	12	14	11	13
14	10	15	12	15	16					14	13	15	15	12	14	11	13
14	10	15	12	15	16					14	13	15	15	12	14	11	13
14	10	15	12	15	16					14	13	15	15	13	14	11	13
14	10	15	12	15	16					14	13	15	15	13	14	11	13
14	10	15	12	15	16					14	13	15	15	13	14	11	13
14	10	15	12	15	16					14	13	15	15	13	14	11	13
14	10	15	12	15	16					14	13	15	15	13	14	11	13
14	10	15	12	15	16					14	13	15	15	13	14	11	14
14	10	15	12	15	16					14	13	15	15	13	14	11	14
14	10	15	12	15	16					14	13	15	15	13	14	11	14
14	10	15	12	15	16					14	13	15	16	13	14	11	14
14	10	15	13	15	16					14	13	15	16	13	14	11	14
14	10	15	13	15	16					14	13	15	16	13	14	11	14
14	10	15	13	15	16					14	13	15	16	13	14	11	14
14	10	15	13	15	16					14	13	15	16	13	14	11	14
14	10	15	13	15	16					14	13	15	16	13	14	11	14
14	10	15	13	15	16					14	13	15	16	13	14	11	14
14	10	15	13	15	16					14	13	15	16	13	15	11	14
14	10	15	13	15	17					14	13	15	16	13	15	11	14
14	10	15	13	15	17					14	13	15	16	13	15	11	14
14	10	15	13	15	17					14	13	15	16	13	15	11	14
14	10	15	13	15	17					14	14	15	16	13	15	11	14
14	10	15	13	15	17					14	14	15	16	13	15	11	14
14	10	15	13	15	17					14	14	15	16	13	15	11	14
14	10	15	13	15	17					14	14	15	16	13	15	11	14
14	10	15	13	15	17					14	14	15	16	13	15	11	14
14	10	15	13	15	17					14	14	15	16	13	15	11	14
14	10	15	13	15	17					14	14	15	16	13	15	11	14
14	10	15	14	15	17					14	14	15	16	13	15	11	14
14	10	15	14	15	17					14	14	15	16	13	15	11	14
14	10	15	14	15	17					14	14	15	16	13	15	11	14
14	10	15	14	15	17					14	14	15	16	13	15	11	14
14	10	15	14	15	17					14	14	15	16	13	15	11	14
14	10	15	14	15	17					14	14	15	17	13	15	11	14
15	11	15	14	15	17					14	14	15	17	13	15	11	14
15	11	15	14	15	17					15	14	15	17	13	15	11	14
15	11	15	14	15	17					15	14	15	17	13	15	11	14
15	11	15	14	15	17					15	14	15	17	13	15	11	14
15	11	15	14	15	17					15	14	15	17	14	15	11	14
15	11	15	14	15	17					15	14	15	17	14	15	11	14
15	11	15	14	15	17					15	14	15	17	14	15	11	14
15	11	15	14	15	17					15	14	15	17	14	15	11	14
15	11	15	14	15	17					15	14	15	17	14	15	11	14
15	11	15	14	15	17					15	14	15	17	14	15	11	14
15	11	15	14	15	17					15	14	15	17	14	15	11	14
15	11	15	14	15	17					15	14	15	17	14	15	12	14
15	11	15	14	15	17					15	14	15	17	14	15	12	14
15	11	15	14	15	17					15	14	15	17	14	15	12	14
15	11	15	14	15	17					15	14	15	17	14	15	12	14
15	11	15	14	15	17					15	14	15	17	14	15	12	14
15	11	15	14	15	17					15	14	15	17	14	15	12	14
15	11	15	14	15	17					15	14	15	17	14	15	12	14
15	11	15	14	15	17					15	14	15	17	14	15	12	14
15	11	15	14	15	17					15	14	15	17	14	15	12	14
15	11	15	14	15	17					15	14	15	17	14	15	12	14
15	11	15	14	15	17					15	14	15	17	14	15	12	14
15	11	16	14	15	17					15	14	15	17	14	15	12	15
15	11	16	14	15	17					15	14	15	17	14	15	12	15
15	11	16	14	15	17					15	14	15	17	14	15	12	15
15	11	16	14	16	18					15	14	15	17	14	15	12	15
15	11	16	14	16	18					15	14	15	17	14	15	12	15
15	11	16	14	16	18					15	14	15	17	15	15	12	15
15	11	16	14	16	18					15	14	15	17	15	15	12	15
15	11	16	14	16	18					15	14	15	17	15	15	12	15
15	11	16	14	16	18					15	14	15	17	15	15	12	15
15	11	16	14	16	18					15	14	15	17	15	15	12	15
15	11	16	14	16	18					15	14	15	17	15	15	12	15
15	11	16	14	16	18					15	14	15	17	15	15	12	15
15	11	16	14	16	18					15	14	15	17	15	15	12	15
15	11	16	14	16	18					15	14	15	17	15	15	12	15
15	11	16	14	16	18					15	14	15	17	15	15	12	15
15	11	16	14	16	18					15	14	15	17	15	15	12	15
15	11	16	14	16	18					15	14	15	17	15	15	12	15
16	11	16	15	16	18					15	15	15	17	15	15	12	15
16	11	16	15	16	18					15	15	15	17	15	15	12	15
16	11	16	15	16	18					15	15	15	17	15	15	12	15
16	11	16	15	16	18					15	15	15	17	15	15	12	15
16	11	16	15	16	18					15	15	15	17	15	15	12	15
16	11	17	15	16	18					15	15	15	17	15	15	12	15
16	11	17	15	16	18					15	15	15	17	15	15	12	15
16	11	17	15	16	18					15	15	15	17	15	15	12	15
16	11	17	15	16	18					15	15	15	17	15	15	12	15
16	11	17	15	16	18					15	15	15	17	15	15	12	15
16	11	17	15	16	18					15	15	15	17	15	15	12	15
16	11	17	15	16	18					15	15	15	17	15	15	12	15
16	11	17	15	16	18					15	15	15	17	15	15	12	15
16	11	17	15	16	18					15	15	15	17	15	15	12	15
16	11	17	15	16	18					15	15	15	17	15	15	12	15
16	11	17	15	16	18					15	15	15	17	15	15	12	15
16	11	17	15	16	18					15	15	15	17	15	15	12	15
16	11	18	15	16	18					15	15	15	17	15	15	12	15
16	11	18	15	16	18					15	15	15	17	15	15	12	15
16	11	18	15	16	18					15	15	15	17	15	15	12	15
16	11	18	15	16	18					15	15	15	17	15	15	12	15
16	11	18	15	16	18					15	15	15	17	15	15	12	15
16	11	18	15	16	18					15	15	15	17	15	15	12	15
16	11	18	15	16	18					15	15	15	17	15	15	12	15
16	11	18	15	16	18					15	15	15	17	15	15	12	15
16	11	18	15	16	18					15	15	15	17	15	15	12	15
16	11	18	15	16	18					15	15	15	17	15	15	12	15
16	11	18	15	16	18					15	15	15	17	15	15	12	15
16	11	18	15	16	18					15	15	15	17	15	15	12	15
16	11	18	15	16	18					15	15	15	17	15	15	12	15
16	11	18	16	16	18					15	15	15	17	15	15	12	15
16	11	18	16	17	18					15	15	15	17	15	15	12	15
16	11	18	16	17	18					15	15	15	17	15	15	12	16
16	11	18	16	17	18					15	15	15	17	15	15	12	16
17	12	19	16	17	18					15	15	15	17	15	15	12	16
17	12	19	16	17	18					15	15	15	17	15	15	12	16
17	12	19	16	17	18					15	15	15	17	15	15	12	16
17	12	19	16	17	18					15	15	15	17	15	15	12	16
17	12	19	16	17	18					15	15	15	17	15	15	12	16
17	12	19	16	17	18					15	15	15	17	15	15	12	16
17	12	19	16	17	18					15	15	15	17	15	15	12	16
17	12	19	16	17	18					15	15	15	17	15	15	12	16
17	12	19	16	17	18					15	15	15	17	15	15	12	16
17	12	19	16	17	18					15	15	15	17	15	15	12	16
17	12	19	16	17	18					15	15	15	17	15	15	12	16
17	12	19	16	17	18					15	15	15	17	15	15	12	16
17	12	19	16	17	18					15	15	15	17	15	15	12	16
17	12	19	16	17	18					15	15	15	17	15	15	12	16
17	12	19	16	17	18					15	15	15	17	15	15	12	16
17	12	20	16	17	18					15	15	15	17	15	15	12	16
17	12	20	16	17	18					15	15	15	17	16	15	12	16
17	12	20	16	17	18					15	15	15	17	16	15	12	16
17	12	20	16	17	19					15	15	15	17	16	15	12	16
17	12	20	17	17	19					15	15	15	17	16	15	12	16
17	12	20	17	17	19					15	15	15	17	16	15	12	16
17	12	20	17	17	19					15	15	15	17	16	15	12	16
17	13	20	17	17	19					15	15	15	17	16	15	12	16
17	13	20	17	17	19					15	16	15	17	16	15	12	16
17	13	20	17	17	19					15	16	15	17	16	15	12	16
17	13	20	17	17	19					15	16	15	17	16	15	12	16
17	13	20	17	17	19					15	16	15	17	16	15	12	16
17	13	20	17	17	19					15	16	15	17	16	15	12	16
17	13	20	17	17	19					15	16	15	17	16	15	12	16
17	13	20	17	17	19					15	16	15	17	16	15	12	16
17	13	20	17	17	19					15	16	15	17	16	15	12	16
17	13	20	17	17	19					15	16	15	17	16	15	12	16
17	13	20	17	17	19					15	16	15	17	16	15	12	16
17	13	20	17	18	19					15	16	15	17	16	15	12	16
17	13	20	17	18	19					15	16	15	17	16	15	12	16
17	13	20	17	18	19					15	16	15	17	16	15	12	16
17	13	20	17	18	19					15	16	15	17	16	15	12	16
17	13	20	17	18	19					15	16	15	17	16	15	12	16
18	13	20	17	18	19					15	16	15	17	16	15	12	16
18	13	20	17	18	19					15	16	15	17	16	15	12	16
18	13	20	17	18	19					15	16	15	17	16	15	12	16
18	13	20	17	18	19					15	16	15	17	16	15	12	16
18	13	20	17	18	19					15	16	15	17	16	15	12	17
18	13	20	17	18	19					16	16	15	17	16	15	12	17
18	13	20	17	18	19					16	16	15	17	16	15	12	17
18	13	20	17	18	19					16	16	15	17	16	15	12	17
18	13	20	17	18	19					16	16	15	17	16	15	12	17
18	13	20	17	18	19					16	16	15	17	16	15	12	17
18	13	20	17	18	19					16	16	15	17	16	15	12	17
18	13	20	17	18	19					16	16	15	17	16	15	12	17
18	13	20	17	18	19					16	16	15	17	16	15	12	17
18	13	20	17	18	19					16	16	15	17	16	15	12	17
18	13	20	17	18	19					16	16	15	17	16	15	13	17
18	13	20	17	18	19					16	16	15	17	16	15	13	17
18	13	20	17	18	19					16	16	15	17	16	15	13	17
18	13	20	17	18	19					16	16	15	17	16	15	13	17
18	13	20	17	18	19					16	16	15	17	16	15	13	17
18	13	20	17	18	19					16	16	15	17	16	15	13	17
18	13	20	17	18	19					16	16	15	17	16	15	13	17
18	14	20	17	18	19					16	16	15	17	16	15	13	17
18	14	20	17	18	19					16	16	15	17	16	15	13	17
18	14	20	17	18	19					16	16	15	17	16	15	13	17
18	14	20	17	18	19					16	16	15	17	16	15	13	17
18	14	20	17	18	19					16	16	15	17	16	15	13	17
18	14	20	17	19	19					16	16	15	17	16	15	13	17
18	14	20	17	19	19					16	16	15	17	16	15	13	17
18	14	20	17	19	19					16	16	15	17	16	15	13	17
18	14	20	17	19	19					16	16	15	17	16	15	13	17
18	14	20	17	19	19					16	16	15	17	16	15	13	17
18	14	20	17	19	19					16	16	15	17	16	15	13	17
18	14	20	17	19	19					16	16	15	17	16	15	13	17
18	14	20	17	19	19					16	16	15	17	16	15	13	17
18	14	20	17	19	19					16	16	15	17	16	15	13	17
18	14	20	17	19	19					16	16	15	17	16	15	13	17
18	14	20	17	19	19					16	16	15	17	16	15	13	17
18	14	20	17	19	19					16	16	15	17	16	15	13	17
19	14	20	17	19	19					16	16	15	17	16	15	13	17
19	14	20	17	19	19					16	16	15	17	16	15	13	17
19	14	20	17	19	19					16	16	15	17	16	15	13	17
19	14	20	17	19	19					16	16	15	17	16	15	13	17
19	14	20	17	19	19					16	16	15	17	16	15	13	17
19	14	20	17	19	19					16	16	15	17	16	15	13	17
19	14	20	17	19	19					16	16	15	17	16	15	13	17
19	14	20	17	19	19					16	16	15	18	16	15	13	17
19	14	20	17	19	19					16	16	15	18	16	15	13	17
19	14	20	17	19	19					16	16	15	18	16	15	13	17
19	14	20	17	19	19					16	16	15	18	16	15	13	17
19	14	20	17	19	19					16	16	15	18	16	15	13	17
19	14	20	17	19	19					16	16	15	18	16	15	13	17
19	14	20	17	19	19					16	16	15	18	16	15	13	17
19	14	20	17	19	19					16	16	15	18	16	15	13	17
19	14	20	17	19	19					16	16	15	18	16	15	13	17
19	14	20	17	19	19					16	16	15	18	16	15	13	17
19	14	20	17	19	19					16	16	15	18	16	15	13	17
19	14	20	17	20	19					16	16	15	18	16	15	13	17
19	14	20	17	20	19					16	16	15	18	16	15	13	17
19	14	20	17	20	19					16	16	15	18	16	15	13	17
19	14	20	17	20	19					16	16	15	18	16	15	13	17
19	14	20	17	20	19					16	16	15	18	16	15	13	17
19	15	20	17	20	19					16	16	15	18	16	15	13	17
19	15	20	17	20	19					16	16	15	18	16	15	13	17
19	15	20	17	20	19					16	16	15	18	16	15	13	17
19	15	20	17	20	19					16	16	15	18	16	15	13	17
19	15	20	17	20	19					16	16	15	18	16	15	13	18
19	15	20	17	20	19					16	16	15	18	16	15	13	18
19	15	20	17	20	19					16	16	15	18	16	15	13	18
19	15	20	17	20	19					16	16	15	18	16	15	13	18
19	15	20	17	20	19					16	16	15	18	16	15	13	18
19	15	20	17	20	19					16	16	15	18	16	15	13	18
19	15	20	17	20	19					16	16	15	18	16	15	13	18
19	15	20	17	20	19					16	16	15	18	16	15	13	18
19	15	20	17	20	19					16	16	15	18	16	15	13	18
19	15	20	17	20	19					16	16	15	18	16	15	13	18
19	15	20	17	20	19					16	16	15	18	16	15	13	18
19	15	20	17	20	19					16	16	15	18	16	15	13	18
19	15	20	17	20	19					16	16	15	18	16	15	13	18
19	15	20	17	20	19					16	16	15	18	16	15	13	18
19	15	20	17	20	19					16	16	15	18	16	15	13	18
19	15	20	17	20	19					16	16	15	18	16	15	13	18
19	15	20	17	20	19					16	16	15	18	16	15	13	18
19	15	20	17	20	19					16	16	15	18	16	15	13	18
19	15	20	17	20	19					16	17	15	18	16	15	13	18
19	15	20	17	20	19					16	17	15	18	16	15	13	18
19	15	20	17	20	19					16	17	15	18	16	15	13	18
19	15	20	17	20	19					16	17	15	18	16	15	13	18
19	15	20	17	20	19					16	17	15	18	16	15	13	18
19	15	20	17	20	19					16	17	15	18	16	15	13	18
19	15	20	17	20	19					16	17	15	18	16	15	13	18
19	15	20	17	20	19					16	17	15	18	16	15	13	18
19	15	20	17	20	19					16	17	15	18	16	15	13	18
19	15	20	17	20	19					16	17	15	18	16	15	13	18
19	15	20	17	20	19					16	17	15	18	16	15	13	18
19	15	20	17	20	19					16	17	15	18	16	15	13	18
19	15	20	17	20	19					16	17	15	18	16	15	13	18
19	15	20	17	20	19					16	17	15	18	16	15	13	18
19	15	20	17	20	19					16	17	15	18	16	15	13	18
19	15	20	18	20	19					16	17	15	18	16	15	13	18
19	15	20	18	20	19					16	17	15	18	16	15	13	18
19	15	20	18	20	19					16	17	15	18	16	15	13	18
19	15	20	18	20	19					16	17	15	18	16	15	13	18
19	15	20	18	20	19					16	17	15	18	16	15	13	18
19	15	20	18	20	19					16	17	15	18	16	15	13	18
19	15	20	18	20	19					16	17	15	18	16	15	13	18
19	15	20	18	20	19					16	17	15	18	16	15	13	18
19	15	20	18	20	19					16	17	15	18	16	15	13	19
19	15	20	18	20	19					16	17	15	18	16	15	13	19
19	15	20	18	20	19					16	17	15	18	16	15	13	19
19	15	20	18	20	19					16	17	15	18	16	15	13	19
20	15	20	18	20	19					16	17	15	18	16	15	13	19
20	15	20	18	20	19					16	17	15	18	16	15	13	19
20	15	20	18	20	19					16	17	15	18	16	15	13	19
20	15	20	18	20	19					16	17	15	18	16	15	13	19
20	15	20	18	20	19					16	17	15	18	16	15	13	19
20	15	20	18	20	19					16	17	15	18	16	15	13	19
20	15	20	18	20	19					16	17	15	18	16	15	13	19
20	15	20	18	20	19					16	17	15	18	17	15	13	19
20	15	20	18	20	19					16	17	15	18	17	15	13	19
20	15	20	18	20	19					16	17	15	19	17	15	13	19
20	15	20	18	20	19					16	17	15	19	17	15	13	19
20	15	20	18	20	19					16	17	15	19	17	15	13	19
20	15	20	18	20	19					16	17	15	19	17	15	13	19
20	15	20	18	20	19					16	17	15	19	17	15	13	19
20	15	20	18	20	19					16	17	15	19	17	15	13	19
20	15	20	18	20	19					16	17	15	19	17	15	13	19
20	15	20	18	20	19					16	17	15	19	17	15	13	19
20	15	20	18	20	19					16	17	15	19	17	15	13	19
20	15	20	18	20	19					16	17	15	19	17	15	13	19
20	15	20	19	20	19					16	17	15	19	17	15	13	19
20	15	20	19	20	19					16	17	15	19	17	15	13	19
20	15	20	19	20	19					16	17	15	19	17	15	13	19
20	15	20	19	20	20					16	17	15	19	17	15	13	19
20	15	20	19	20	20					16	17	15	19	17	15	13	19
20	15	20	19	20	20					16	17	15	19	17	15	13	19
20	15	20	19	20	20					16	17	15	19	17	15	13	19
20	15	20	19	20	20					16	17	15	19	17	15	13	19
20	15	20	19	20	20					16	17	15	19	17	15	13	19
20	15	20	19	20	20					16	17	15	19	17	15	13	19
20	15	20	19	20	20					16	17	15	19	17	15	13	19
20	15	20	19	20	20					16	17	15	19	17	15	13	19
20	15	20	19	20	20					16	17	15	19	17	15	13	19
20	15	20	19	20	20					16	17	15	19	17	15	13	19
20	15	20	19	20	20					16	17	15	19	17	15	13	19
20	15	20	19	20	20					16	17	15	19	17	15	13	19
20	15	20	19	20	20					16	17	15	19	17	15	13	19
20	15	20	19	20	20					16	17	15	19	17	15	13	19
20	15	20	19	20	20					16	17	15	19	17	15	13	19
20	15	20	19	20	20					16	17	15	19	17	15	13	19
20	15	20	19	20	20					16	17	15	19	17	15	13	19
20	15	20	19	20	20					16	17	15	19	17	15	13	19
20	15	20	19	20	20					17	17	15	19	17	15	13	19
20	15	20	19	20	20					17	17	15	19	17	15	13	19
20	15	20	19	20	20					17	17	15	19	17	15	13	19
20	15	20	19	20	20					17	17	15	19	17	15	13	19
20	15	20	19	20	20					17	17	15	19	17	15	13	19
20	15	20	19	20	20					17	17	15	19	17	15	13	19
20	15	20	19	20	20					17	17	15	19	17	15	13	19
20	15	20	19	20	20					17	17	15	19	17	15	13	19
20	15	20	19	20	20					17	17	15	19	17	15	13	19
20	15	20	19	20	20					17	17	15	19	17	15	13	19
20	15	20	19	20	20					17	17	15	19	17	15	13	19
20	15	20	19	20	20					17	17	15	19	17	15	13	19
20	15	20	19	20	20					17	17	15	19	17	15	13	19
20	15	20	19	21	20					17	17	15	19	17	15	13	19
20	15	20	19	21	20					17	17	15	19	17	15	13	19
20	15	20	19	21	20					17	17	15	19	17	15	13	19
20	15	20	19	21	20					17	17	15	19	17	15	13	19
20	15	20	19	21	20					17	17	15	19	17	15	13	19
20	15	20	19	21	20					17	17	15	19	17	15	13	19
20	15	20	19	21	20					17	17	15	19	17	15	13	19
20	15	20	19	21	21					17	17	15	19	17	15	13	19
20	15	20	19	21	21					17	17	15	19	17	15	13	19
20	15	20	19	21	21					17	17	15	19	17	15	13	19
20	15	20	19	21	21					17	17	15	19	17	15	13	19
20	15	20	19	21	21					17	17	15	19	17	15	13	19
20	15	20	19	21	21					17	17	15	19	17	15	13	19
20	15	20	19	21	21					17	17	15	19	17	15	13	19
20	15	20	19	21	21					17	17	15	19	17	15	13	19
20	15	20	19	21	21					17	17	15	19	17	15	13	19
20	15	20	19	21	21					17	17	15	19	17	15	13	19
21	15	20	19	21	21					17	17	15	19	17	15	13	19
21	15	20	19	21	21					17	17	15	19	17	15	13	19
21	15	20	19	21	21					17	17	15	19	17	15	13	19
21	15	20	19	21	21					17	17	15	19	17	15	13	19
21	15	20	19	21	21					17	17	15	19	17	15	13	19
21	15	20	19	21	21					17	17	15	19	17	15	13	19
21	15	20	19	21	21					17	17	15	19	17	15	13	19
21	15	20	19	21	21					17	17	15	19	17	15	13	19
21	15	20	19	21	21					17	17	15	19	17	15	13	19
21	15	20	19	21	21					17	17	15	19	17	15	13	19
21	15	20	19	21	21					17	17	15	19	17	15	13	19
21	15	20	19	21	21					17	17	15	19	17	15	13	19
21	15	20	19	21	21					17	17	15	19	17	15	13	19
21	15	20	19	21	21					17	17	15	19	17	15	13	19
21	15	20	19	21	21					17	17	15	19	17	15	13	19
21	15	20	19	21	21					17	17	15	19	17	15	13	19
21	15	20	19	21	21					17	17	15	19	17	15	13	19
21	15	20	19	21	21					17	17	15	19	17	15	13	19
21	15	20	19	21	21					17	17	15	19	17	15	13	19
21	15	20	19	21	21					17	17	15	19	17	15	13	19
21	15	20	19	21	21					17	17	15	19	17	15	13	19
21	16	20	19	21	21					17	17	15	19	17	15	13	19
21	16	20	19	21	21					17	17	15	19	17	15	13	19
21	16	20	19	21	21					17	17	15	19	17	15	13	19
21	16	20	19	21	21					17	17	15	19	17	15	13	19
21	16	20	19	21	21					17	17	15	19	17	15	13	19
21	16	20	19	21	21					17	17	15	19	17	15	13	19
21	16	20	19	21	21					17	17	15	19	17	15	13	19
21	16	20	19	21	21					17	17	15	19	17	15	13	19
21	16	20	19	21	21					17	17	15	19	17	15	13	19
21	16	20	19	21	21					17	17	15	19	17	15	13	19
21	16	20	19	21	21					17	17	15	19	17	15	13	19
21	16	20	19	21	21					17	17	15	19	17	15	13	19
21	16	20	19	21	21					17	17	15	19	17	15	13	19
21	16	20	19	21	21					17	17	15	19	17	15	13	19
21	16	20	19	21	21					17	17	15	19	17	15	13	19
21	16	20	19	21	21					17	17	15	19	17	15	13	19
21	16	20	19	21	21					17	17	15	19	17	15	13	19
21	16	20	19	21	21					17	17	15	19	17	15	13	19
21	16	20	19	21	21					17	17	15	19	17	15	13	19
21	16	20	19	21	21					17	17	15	19	17	15	13	19
21	16	20	19	21	21					17	17	15	19	17	15	13	19
21	16	20	19	21	21					17	17	15	19	17	15	13	19
21	16	20	19	21	21					17	17	15	19	17	15	13	19
21	16	20	19	21	21					17	17	15	19	17	15	13	19
21	16	20	19	21	21					17	17	15	19	17	15	13	19
21	16	20	19	21	21					17	17	15	19	17	15	13	19
21	16	20	19	21	21					17	17	15	19	18	15	13	19
21	16	20	19	21	21					17	17	15	19	18	15	13	19
21	16	20	19	21	21					17	17	15	19	18	15	13	19
21	16	20	19	21	21					17	17	15	19	18	15	13	19
21	16	20	19	21	21					17	17	15	19	18	15	13	19
21	16	20	19	21	21					17	17	15	19	18	15	13	19
21	16	20	19	21	21					17	17	15	19	18	15	13	19
21	16	20	19	21	21					17	17	15	19	18	15	13	19
21	16	20	19	21	21					17	17	15	19	18	15	13	19
21	16	20	19	21	21					17	17	15	19	18	15	13	19
21	16	20	19	21	21					17	17	15	19	18	15	13	19
21	16	20	19	21	21					17	17	15	19	18	15	13	19
21	16	20	19	21	21					17	17	15	19	18	15	13	19
21	16	20	19	21	21					17	17	15	19	18	15	13	19
21	16	20	19	21	21					17	17	15	19	18	15	13	19
21	16	20	19	21	21					17	17	15	19	18	15	13	19
21	16	20	19	21	21					17	17	15	19	18	15	13	19
21	16	20	19	21	21					17	17	15	19	18	15	13	19
21	16	20	19	21	21					17	17	15	19	18	15	13	19
21	16	20	19	21	21					17	17	15	19	18	15	13	19
21	17	20	19	21	21					17	17	15	19	18	15	13	19
21	17	20	19	21	21					17	17	15	19	18	15	13	19
21	17	20	19	21	21					17	17	15	19	18	15	13	19
21	17	20	19	21	21					17	17	15	19	18	15	13	19
21	17	20	19	21	21					17	17	15	19	18	15	13	19
21	17	20	19	21	21					17	17	15	19	18	15	13	19
21	17	20	19	21	21					17	17	15	19	18	15	13	19
21	17	20	19	21	21					17	17	15	19	18	15	13	19
21	17	20	19	21	21					17	17	15	19	18	15	13	19
21	17	20	19	21	21					17	17	15	19	18	15	13	19
21	17	20	19	21	21					17	17	15	19	18	15	13	19
21	17	20	19	21	21					17	17	15	19	18	15	13	19
21	17	20	19	21	21					17	17	15	19	18	15	13	19
21	17	20	19	21	21					17	17	15	19	18	15	13	19
21	17	20	19	21	21					17	17	15	19	18	15	13	19
21	17	20	19	21	21					17	17	15	19	18	15	13	19
21	17	20	19	21	21					17	17	15	19	18	15	13	19
21	17	20	19	21	21					17	17	15	19	18	15	13	19
21	17	20	19	21	21					17	17	15	19	18	15	13	19
21	17	20	19	21	21					17	17	15	19	18	15	13	19
21	17	20	19	21	21					17	17	15	19	18	15	13	19
21	17	20	19	21	21					17	17	15	19	18	15	13	19
21	17	20	19	21	21					17	17	15	19	18	15	13	19
21	17	20	19	21	21					17	17	15	19	18	15	13	19
21	17	20	19	21	21					17	17	15	19	18	15	13	19
21	17	20	19	21	21					17	17	15	19	18	15	13	19
21	17	20	19	21	21					17	17	15	19	18	15	13	19
21	17	20	19	21	21					17	17	15	19	18	15	13	19
21	17	20	19	21	21					17	17	15	19	18	15	13	19
21	17	20	19	21	21					17	17	15	19	18	15	13	19
21	17	20	19	21	21					17	17	15	19	18	15	13	19
21	17	20	19	21	21					17	17	15	19	18	15	13	19
21	17	20	19	21	21					17	17	15	19	18	15	13	19
21	17	20	19	21	21					17	17	15	19	18	15	13	19
21	17	20	19	21	21					17	17	15	19	18	15	13	19
21	17	20	19	21	21					17	17	15	19	18	15	13	19
21	17	20	19	21	21					17	17	15	19	18	15	13	20
21	17	20	19	21	21					17	17	15	19	18	15	14	20
21	17	20	19	21	21					17	17	15	19	18	15	14	20
21	17	20	19	21	21					17	17	15	19	18	15	14	20
21	17	20	19	21	21					17	17	15	19	18	15	14	20
21	17	20	19	21	21					17	17	15	19	18	15	14	20
21	17	20	19	21	21					17	17	15	19	18	15	14	20
21	17	20	19	21	21					17	17	15	19	18	15	14	20
21	17	20	19	21	21					17	17	15	19	18	15	14	20
21	17	20	19	21	21					17	17	15	19	18	15	14	20
21	17	20	19	21	21					17	17	15	19	18	15	14	20
21	17	20	19	21	21					17	17	15	19	18	15	14	20
21	17	20	19	21	21					17	17	15	19	18	15	14	20
21	17	20	19	21	21					17	17	15	19	18	15	14	20
21	17	20	19	21	21					17	18	15	19	18	15	14	20
21	17	20	19	21	21					17	18	15	19	18	15	14	20
21	17	20	19	21	21					17	18	15	19	18	15	14	20
21	17	20	19	21	21					17	18	15	19	18	15	14	20
21	17	20	19	21	21					17	18	15	19	18	15	14	20
21	17	20	19	21	21					17	18	15	19	18	15	14	20
21	17	20	19	21	21					17	18	15	19	18	15	14	20
21	17	20	19	21	21					17	18	15	19	18	15	14	20
21	17	20	19	21	21					17	18	15	19	18	15	14	20
21	17	20	19	21	21					17	18	15	19	18	15	14	20
21	17	20	19	21	21					17	18	15	19	18	15	14	20
21	17	20	19	21	21					17	18	15	20	18	15	14	20
21	17	20	19	21	21					17	18	15	20	18	15	14	20
21	17	20	19	21	21					17	18	15	20	18	15	14	20
21	17	20	19	21	21					17	18	15	20	18	15	14	20
21	17	20	19	21	21					17	18	15	20	18	15	14	20
21	18	20	19	21	21					17	18	15	20	18	15	14	20
21	18	20	19	21	21					18	18	15	20	18	15	14	20
21	18	20	19	21	21					18	18	15	20	18	15	14	20
21	18	20	19	21	22					18	18	15	20	18	15	14	20
21	18	20	19	21	22					18	18	15	20	18	15	14	20
21	18	20	19	21	22					18	18	15	20	18	15	14	20
21	18	20	19	21	22					18	18	15	20	18	15	14	20
21	18	20	19	21	22					18	18	15	20	18	15	14	20
21	18	20	19	21	22					18	18	15	20	18	15	14	20
21	18	20	19	21	22					18	18	15	20	18	15	14	20
21	18	20	19	21	22					18	18	15	20	18	15	14	20
21	18	20	19	21	22					18	18	15	20	18	15	14	20
21	18	20	19	21	22					18	18	15	20	18	15	14	20
21	18	20	19	21	22					18	18	15	20	18	15	14	20
21	18	20	19	21	22					18	18	15	20	18	15	14	20
21	18	20	19	21	22					18	18	15	20	18	15	14	20
21	18	20	19	21	22					18	18	15	20	18	15	14	20
21	18	20	19	21	22					18	18	15	20	18	15	15	20
21	18	20	19	21	22					18	18	15	20	18	15	15	20
21	18	20	19	21	22					18	18	15	20	18	15	15	20
21	18	20	19	21	22					18	18	15	20	18	15	15	20
21	18	20	19	21	22					18	18	15	20	18	15	15	20
21	18	20	19	21	22					18	18	15	20	18	15	15	20
21	18	20	19	21	22					18	18	15	20	18	15	15	20
21	18	20	19	21	22					18	18	15	20	18	15	15	20
21	18	20	19	21	22					18	18	15	20	18	15	15	20
21	18	20	19	21	22					18	18	15	20	18	15	15	20
21	18	20	19	21	22					18	18	15	20	18	15	15	20
21	18	20	19	21	22					18	18	15	20	18	15	15	20
21	18	20	19	21	22					18	18	15	20	18	15	15	20
21	18	20	19	21	22					18	18	15	20	18	15	15	20
21	18	20	19	21	22					18	18	15	20	18	15	15	20
21	18	20	19	21	22					18	18	15	20	18	15	15	20
21	18	20	19	21	22					18	18	15	20	18	15	15	20
21	18	20	19	21	22					18	18	15	20	18	15	15	20
21	18	20	19	21	22					18	18	15	20	18	15	15	20
21	18	20	19	21	22					18	18	15	20	18	15	15	20
21	18	20	19	21	22					18	18	15	20	18	15	15	20
21	18	20	19	21	22					18	18	15	20	18	15	15	20
21	18	20	19	21	22					18	18	15	20	18	15	15	20
21	18	20	19	21	22					18	18	15	20	18	15	15	20
21	18	20	19	21	22					18	18	15	20	18	15	15	20
21	18	20	19	21	22					18	18	15	20	18	15	15	20
21	18	20	19	21	22					18	18	15	20	18	15	15	20
21	18	20	19	21	22					18	18	15	20	18	15	15	20
21	18	20	19	21	22					18	18	15	20	18	15	15	20
21	18	20	19	21	22					18	18	15	20	18	15	15	20
21	18	20	19	21	22					18	18	15	20	18	15	15	20
21	18	20	19	21	22					18	18	15	20	18	15	15	20
21	18	20	19	21	22					18	18	15	20	18	15	15	20
21	18	20	19	21	22					18	18	15	20	18	15	15	20
21	18	20	19	21	22					18	18	15	20	18	15	15	20
21	18	20	19	21	22					18	18	15	20	18	15	15	20
21	18	20	19	21	22					18	18	15	20	18	15	15	20
21	18	20	19	21	22					18	18	15	20	18	15	15	20
21	18	20	19	21	22					18	18	15	20	18	15	15	20
21	18	20	19	21	22					18	18	15	20	18	15	15	20
21	18	20	19	21	22					18	18	15	20	18	15	15	20
21	18	20	19	21	22					18	18	15	20	18	15	15	20
21	18	20	19	21	22					18	18	15	20	18	15	15	20
21	18	20	19	21	22					18	18	15	20	18	15	15	20
21	18	20	19	21	22					18	18	15	20	18	15	15	20
21	18	20	19	21	22					18	18	15	20	18	15	15	20
21	18	20	19	21	22					18	18	15	20	18	15	15	20
21	18	20	19	21	22					18	18	15	20	18	15	15	20
21	18	20	19	21	22					18	18	15	20	18	15	15	20
21	18	20	19	21	22					18	18	15	20	18	15	15	20
21	18	20	19	21	22					18	18	15	20	18	15	15	20
21	18	20	19	21	22					18	18	15	20	18	15	15	20
21	18	20	19	21	22					18	18	15	20	18	15	15	20
21	18	20	19	21	22					18	18	15	20	18	15	15	20
21	18	20	19	21	22					18	18	15	20	18	15	15	20
21	18	20	19	21	22					18	18	15	20	18	15	15	20
21	18	20	19	21	22					18	18	15	20	18	15	15	20
21	18	20	19	21	22					18	18	15	20	18	15	15	20
21	18	20	19	21	22					19	18	15	20	18	15	15	20
21	18	20	19	21	22					19	18	15	20	18	15	15	20
21	18	20	19	21	22					19	18	15	20	18	15	15	20
21	18	20	19	21	22					19	18	15	20	18	15	15	20
21	18	20	20	21	22					19	18	15	20	18	15	15	20
21	18	20	20	21	22					19	18	15	20	18	15	15	20
21	18	20	20	21	22					19	18	15	20	18	15	15	20
21	18	20	20	21	22					19	18	15	20	18	15	15	20
21	18	20	20	21	22					19	18	15	20	18	15	15	20
21	18	20	20	21	22					19	18	15	20	18	15	15	20
21	18	20	20	21	22					19	18	15	20	18	15	15	20
21	18	20	20	21	22					19	18	15	20	18	15	15	20
22	18	20	20	21	22					19	18	15	20	18	15	15	20
22	18	20	20	21	22					19	18	15	20	18	15	15	20
22	18	20	20	21	22					19	18	15	20	18	15	15	20
22	18	20	20	21	22					19	18	15	20	18	15	15	20
22	18	20	20	21	22					19	18	15	20	18	15	15	20
22	18	20	20	21	22					19	18	15	20	18	15	15	20
22	18	20	20	21	22					19	18	15	20	18	15	15	20
22	18	20	20	21	22					19	18	15	20	18	15	15	20
22	18	20	20	21	22					19	18	15	20	18	15	15	20
22	18	20	20	21	22					19	18	15	20	18	15	15	20
22	18	20	20	21	22					19	18	15	20	18	15	15	20
22	18	20	20	21	22					19	18	15	20	18	15	15	20
22	18	20	20	21	22					19	18	15	20	18	15	15	20
22	18	20	20	21	22					19	18	15	20	18	15	15	20
22	18	20	20	21	22					19	18	15	20	18	15	15	20
22	18	20	20	21	22					19	18	15	20	18	15	15	20
22	18	20	20	21	22					19	18	15	20	18	15	15	20
22	18	20	20	21	22					19	18	15	20	18	15	15	20
22	18	20	20	21	22					19	18	15	20	18	15	15	20
22	18	20	20	21	22					19	18	15	20	18	15	15	20
22	18	20	20	21	22					19	18	15	20	18	15	15	20
22	18	20	20	21	22					19	18	15	20	18	15	15	20
22	18	20	20	21	22					19	18	15	20	18	15	15	20
22	18	20	20	21	22					19	18	15	20	18	15	15	20
22	18	20	20	21	22					19	18	15	20	18	15	15	20
22	18	20	20	21	22					19	18	15	20	18	15	15	20
22	18	20	20	21	22					19	18	15	20	18	15	15	20
22	18	20	20	21	22					19	18	15	20	18	15	15	20
22	18	20	20	21	22					19	18	15	20	18	15	15	20
22	18	20	20	21	22					19	18	15	20	18	15	15	20
22	18	20	20	21	22					19	18	15	20	18	15	15	20
22	18	20	20	21	22					19	18	15	20	18	15	15	20
22	18	20	20	21	22					19	18	15	20	18	15	15	20
22	18	20	20	21	22					19	18	15	20	18	15	15	20
22	18	20	20	21	22					19	18	15	20	18	15	15	20
22	18	20	20	21	22					19	18	15	20	18	15	15	20
22	18	20	20	21	22					19	18	15	20	18	15	15	20
22	18	20	20	21	22					19	18	15	20	18	15	15	20
22	18	20	20	21	22					19	18	15	20	18	15	15	20
22	18	20	20	21	22					19	18	15	20	18	15	15	20
22	18	20	20	21	22					19	18	15	20	18	15	15	20
22	18	20	20	21	22					19	18	15	20	18	15	15	20
22	18	20	20	21	22					19	18	15	20	18	15	15	20
22	18	20	20	21	22					19	18	15	20	18	15	15	20
22	18	20	20	21	22					19	18	15	20	18	15	15	20
22	18	20	20	21	22					19	18	15	20	18	15	15	20
22	18	20	20	21	22					19	18	15	20	18	15	15	20
22	18	20	20	21	22					19	18	15	20	18	15	15	20
22	18	20	20	21	22					19	18	15	20	18	15	15	20
