# Supplementary material for: Metabolic sensing in AgRP neurons integrates homeostatic state with dopamine signalling in the striatum
Source: eLife journal article supplement (doi:10.7554/elife.72668), 2022-01-12
Supplement: fig5-data1 [file elife-72668-fig5-data1-v2.zip]

## Sheet: Sheet1
NFO									CHOW									PB
1.34	0.235	-2.22	-0.28	0.215	-0.192	1.88			2.72	-0.294	-0.56	-0.796	-0.576	1.43	0.929			-0.297	2.69	-0.504	1.67	-0.102	0.715	1.57
2.44	0.916	-0.711	-0.798	0.787	-0.124	-0.561			2.6	0.278	-0.776	-1.04	-0.736	0.349	0.448			-1.36	0.971	0.772	0.969	0.144	-1.95	0.211
2.74	0.383	-2.23	1.28	0.982	1.54	-0.61			1.85	1.19	1.14	-0.73	-1.06	-0.00386	-0.726			-0.32	0.644	-0.3	-0.0572	0.148	-0.05	0.103
2.41	-0.32	-0.0583	0.776	0.725	2.5	0.0115			1.8	0.0418	-0.534	-0.987	-0.938	-0.267	-1.68			-1.99	1.54	-0.715	0.0845	0.611	-2.53	-0.332
1.74	-0.0717	-2.27	0.426	0.789	3.02	-0.173			1.3	-1.97	0.324	-0.545	0.152	-1.58	0.105			-1.2	1.17	0.771	-1.09	1.07	-1.23	-0.271
1.51	-0.318	-0.518	1.21	-0.109	2.39	1.14			0.721	-0.0153	-0.0606	-0.813	-0.135	-2.79	-0.308			-0.715	0.539	0.965	0.483	0.232	-0.192	-0.581
1.01	0.988	-2.05	-1.22	-0.2	1.52	0.359			-0.231	-0.513	-0.449	-0.971	0.0826	0.201	-0.507			-1.43	1.35	0.698	-0.0799	-0.0618	1.38	0.412
0.837	0.928	-0.941	-0.426	-0.252	1.66	0.304			-0.497	1.17	-0.938	-1.09	0.28	-1.29	0.338			-1.16	1.58	0.284	-1.15	-0.102	-0.427	0.792
0.78	2.01	0.168	2.66	-0.208	2.16	1.9			-0.588	0.711	-0.281	-0.572	1.07	-1.07	-1.04			0.202	1.27	0.603	-0.556	-0.0619	1.13	0.429
0.332	1.09	-0.297	2.04	0.472	1.63	-0.679			-1.71	-0.602	-2.63	-1.08	0.406	0.551	-0.0969			-0.65	1.2	0.0427	0.941	-0.502	0.226	1.38
0.00885	0.709	-1.01	1.93	1.27	1.57	-0.86			-1.63	-0.684	-2.17	-0.733	0.409	0.33	-0.62			-0.6	0.365	0.124	1.03	0.989	1.7	-0.518
-0.232	0.528	0.244	1.38	1.74	0.868	-0.601			-1.7	-0.986	-0.014	-0.634	0.423	0.548	1.32			-0.599	-0.247	0.48	0.311	1.65	0.8	-0.414
0.309	1.17	-0.282	0.785	2.23	1.96	0.548			-1.77	-1.27	-0.202	-0.0324	-0.0215	-0.465	0.759			-0.221	-0.197	-0.736	-1.34	1.38	0.205	-0.543
0.931	1.55	-0.0256	-0.456	2.47	1.72	-0.809			-1.16	-1.42	-0.888	0.0306	-0.203	0.206	0.735			-0.316	-0.167	0.843	-1.43	1.41	0.208	1.59
0.522	1.96	0.789	-0.0482	1.59	1.25	1.15			-0.786	0.758	-0.743	0.455	-0.446	-0.0232	0.258			-0.533	1.31	0.228	-2.84	0.506	-0.435	0.0996
0.337	0.715	0.442	0.049	1.53	0.713	-1.48			-1.7	0.201	-0.702	-0.385	-0.459	-1.13	2.53			-1.14	0.402	1.22	-2.59	-0.0988	0.637	-0.693
0.151	-1.93	-0.145	-0.425	0.682	0.974	-0.919			-1.71	-0.779	-0.113	0.096	-0.814	-0.494	-0.386			-0.629	-0.0754	0.543	-1.21	1.03	-1.17	-1.49
0.506	-0.658	-1.37	0.163	0.749	1.72	-1.42			-0.00749	-0.0233	-0.349	-1.09	-1.59	-0.91	1.8			-1.35	0.168	0.301	0.327	0.182	-0.756	-0.767
0.552	-0.943	0.508	-0.29	0.935	1.16	0.64			-0.0321	-0.396	0.35	-0.569	-1.61	-0.0747	-0.41			-1.29	-0.202	0.214	0.4	-0.531	0.815	0.581
0.845	-0.504	2.18	-1.29	1.16	1.14	-0.207			-0.91	-0.448	-0.202	0.577	-1.22	-0.452	-0.565			-1.16	0.288	-0.691	0.906	-0.000458	1.38	1.33
1.17	-0.346	1.1	-1.04	0.571	0.121	-0.617			-1.14	0.346	0.422	0.567	-0.655	0.439	-0.161			-1.65	-0.238	-1.65	0.617	0.581	-0.128	0.0224
1.2	-0.385	0.901	-0.939	-0.503	-0.415	0.115			-1.69	-0.43	-0.494	0.0718	-0.797	-0.474	1.33			-1.83	1.8	-1.71	0.537	0.646	1.97	0.704
1.34	0.388	0.24	-0.908	0.0575	0.27	0.218			-1.75	-0.154	-0.307	-0.507	-0.886	0.322	-0.644			-1.85	-0.851	-2.61	0.15	-0.338	0.318	2.13
1.31	-0.457	0.143	-0.81	0.264	0.261	-0.448			-1.82	0.298	-0.422	-0.0958	-0.668	-0.776	0.447			-2.49	-0.268	1.1	0.317	-0.487	-0.489	2.4
0.943	-1.77	1.31	-0.266	-0.893	0.121	-0.351			-1.39	0.18	1.71	-0.89	-0.951	-0.149	0.495			-2.06	0.182	0.969	0.214	-0.616	-0.0563	2.66
0.778	-0.164	0.843	0.2	-0.636	0.581	0.0138			-1.42	0.0594	1.76	-0.294	-0.894	-0.116	1.3			-0.882	0.996	0.254	0.308	-0.602	-0.11	2.61
0.419	-0.944	1.26	1.79	-0.734	0.512	1.35			-0.813	0.689	2.76	-0.251	-0.85	-1.64	1.56			-0.93	1.05	-1.67	0.719	-0.599	1.41	2.35
0.153	-0.129	0.882	0.754	-1.88	-0.406	0.265			-0.264	-0.449	1.01	-1.48	-0.906	-1.9	2.67			-0.897	-0.439	-0.225	0.0985	-0.742	0.131	1.22
0.226	0.099	-0.257	0.402	-1.39	-0.893	-0.216			-0.471	-0.578	1.46	-0.755	-0.814	-1.47	1.59			-0.469	0.214	1.14	0.534	-0.258	0.0628	0.563
-0.0123	-0.0892	-0.198	0.872	-1.04	-0.898	1.47			0.291	0.18	0.607	0.205	-1.17	-1.49	1.28			0.0575	1.6	-0.0346	1.75	-1.1	-0.0188	0.764
-0.077	-0.34	-0.547	0.919	-1.29	-1.24	0.0257			0.533	-0.449	1.82	-0.108	-0.907	-1.18	1.24			0.125	-0.456	0.317	1.78	-0.86	-0.985	2.14
0.27	-0.889	0.557	1.52	-1.82	-0.0483	-0.243			0.392	0.195	0.8	0.12	-1.51	-1.3	0.674			0.978	-0.911	1.5	0.207	-0.533	-0.417	1.05
0.265	0.103	0.114	0.992	-2.03	-0.805	2.85			0.771	-0.475	-0.0728	-0.359	-1.42	-0.149	0.0729			0.403	0.122	0.696	0.388	-0.637	-0.513	1.17
0.345	0.387	0.106	1.31	-2.01	0.633	0.658			-0.315	-0.358	1.67	-0.0438	-1.57	-0.938	0.104			0.502	1.18	-0.93	-0.0311	-0.619	0.478	0.47
-0.0315	-0.0504	0.0578	0.525	-1.14	-0.0648	0.809			-0.124	-0.426	1.75	0.741	-1.76	-2.06	0.554			2.03	0.129	1.4	-1.82	0.121	0.53	0.921
1.05	-0.298	0.91	0.0703	-0.0402	0.219	2.88			0.261	-0.781	-0.377	0.738	-1.69	-0.947	-0.346			1.42	-0.0224	-0.0762	-1.82	0.232	1	0.718
1.76	-0.182	0.028	0.601	-1.07	0.0818	-0.49			0.191	0.147	1.8	0.385	-0.658	0.807	0.804			1.27	0.587	0.897	-1.56	0.252	-1.34	0.106
1.5	-0.589	0.554	0.285	-0.628	-0.178	0.0738			-0.0829	0.202	0.205	0.484	-0.561	-0.723	2.25			0.418	0.828	-0.702	0.461	0.449	0.754	-0.976
1.08	-0.249	-0.123	-1.08	-0.917	-0.773	-1.63			-0.19	-0.0253	1.72	-0.826	-1.06	-0.226	0.207			0.122	1.32	-0.092	0.0956	-0.223	1.03	-1.21
1.38	0.925	0.821	1.06	-0.643	-1.01	1.01			-0.529	-0.75	1.63	0.0865	-1.09	0.171	-0.48			-0.254	1.04	-0.000351	-0.587	-0.657	0.584	-0.434
2	-0.403	0.738	0.692	-1.01	-1.12	0.129			-0.344	0.435	1.89	-0.653	-0.342	0.325	-0.129			-0.676	-0.544	-1.16	1.71	-0.652	1.72	1.18
1.56	0.308	0.0711	-0.45	-0.81	-0.758	1.21			-0.228	0.176	1.36	-0.268	-0.184	-0.319	1.35			-0.718	1.72	0.231	1.27	-0.437	1.91	-0.243
0.969	-0.136	1.58	-0.793	-1.74	-1.07	1.99			0.0775	-0.544	1.37	0.00719	0.287	0.0577	-0.81			0.69	1.31	-0.676	1.02	0.185	0.168	-1.98
0.832	-0.046	0.773	-0.0114	-2.08	-0.863	0.693			0.128	0.328	1.51	0.774	0.873	-0.384	0.242			0.185	0.947	1.39	1.47	-0.0145	1.42	-1.3
0.704	0.497	-0.228	0.993	-1.19	-0.772	1.01			0.508	-0.639	0.727	0.362	0.866	-0.261	0.556			1.26	0.767	-1.07	1.17	-0.466	-0.401	0.0447
0.399	1.24	-1.33	-0.288	-0.298	-1.2	-1.22			0.366	-0.218	-0.0977	-0.481	0.719	0.507	0.119			0.698	-0.223	1.03	-0.0419	-0.664	0.611	-0.771
0.199	1.85	-0.0503	-0.163	-0.228	-1.95	0.268			0.701	-0.82	-0.275	-0.288	1.54	0.973	-0.479			0.56	-0.605	0.775	-0.0655	-0.346	-0.0518	-0.188
0.229	1.57	1.21	-0.182	0.429	-1.42	0.372			0.941	0.225	0.0323	-0.851	1.06	0.826	1.27			0.968	0.308	1.31	0.0863	-0.91	2.83	-1.14
0.0686	0.346	-0.456	-0.331	0.589	-0.539	0.439			0.887	0.107	-0.48	-0.927	0.926	0.935	0.165			-0.328	-0.763	0.294	-0.529	-0.89	0.231	-0.0162
0.347	0.346	-1.33	0.0855	0.519	-0.994	-0.0886			0.859	-1.61	0.335	-0.198	0.00344	1.01	0.508			-0.835	-0.868	1.46	0.118	-1.75	-1.3	-0.547
0.451	-0.645	-1.72	-0.188	0.484	-1.32	-0.438			0.788	-1.96	-0.209	0.318	0.07	2.19	0.673			-0.543	-1.9	-0.58	0.697	-0.725	0.613	-1.33
0.176	1.6	-0.276	-1.13	0.918	-1.26	1.63			0.739	-1.57	-0.127	0.383	0.497	1.7	-0.245			0.119	-0.208	0.876	0.453	-0.381	0.531	-1.9
-0.584	0.972	-1.42	0.8	1.37	0.0161	0.443			0.132	-1.01	-0.375	0.871	0.589	1.79	-0.428			-0.0705	0.196	0.919	0.252	-0.818	0.276	-1.41
-0.246	0.117	-0.275	-0.557	1.51	0.321	-1.75			0.244	-2.13	-0.107	0.832	0.823	2.51	-0.187			-0.455	-1.66	1.09	0.293	-0.232	-0.623	0.381
-0.803	-0.277	-0.243	-0.0403	0.523	-0.64	-1.06			0.532	-1.54	-1.14	0.839	1.07	1.06	-2.38			-0.337	0.281	1.85	0.0309	-1.22	-1.44	1.14
-0.87	0.844	0.729	0.09	0.95	-0.112	0.143			1.03	-1.41	-1.36	-0.0941	1.13	1.12	0.0685			-0.376	-0.0374	1.12	0.787	-1.39	-1.38	1.18
-0.771	1.28	-0.123	0.172	2.04	-0.641	0.876			0.908	-1.35	-1.64	0.313	1.01	-0.21	-0.13			-0.386	-1.33	1	-0.215	-1.38	-2.07	0.516
-0.403	1.27	-0.0826	-1.04	0.893	0.153	0.242			0.593	-0.63	-1.47	-0.274	1.22	0.13	-0.0626			0.369	-1.56	-0.376	-0.642	-0.9	0.594	-0.828
-0.384	-0.195	-0.745	0.072	0.406	0.321	-0.547			0.389	-0.533	-0.634	-0.231	1.31	-0.224	-0.733			0.298	0.823	-0.974	1.28	-0.387	-0.157	-0.745
-0.998	0.173	-0.854	-1.28	-0.069	-0.369	-0.105			0.287	-1.27	0.373	0.0289	0.86	1.24	0.67			0.606	-0.661	-0.195	1.43	-0.653	0.959	0.742
-1.29	1.2	-0.575	-0.992	-0.375	-1.5	0.556			1.06	-0.369	-0.522	1.1	1.31	0.366	-0.962			0.762	0.388	0.418	-1.01	-0.421	-0.837	-0.0131
-1.39	0.637	0.74	-0.0757	-0.678	-0.534	-0.53			0.521	1.09	-0.278	1.1	1.67	-0.0858	1.04			0.9	1.1	1.4	0.029	-0.835	-0.139	-0.354
-1.47	0.986	-1.85	-0.143	-0.927	0.0125	-0.388			0.621	0.67	0.0194	0.828	1.98	0.504	0.51			0.383	1.12	-0.697	0.527	0.00184	0.0539	-0.655
-1.5	0.793	-1.11	0.352	-1.08	0.261	-0.253			0.434	-0.473	0.428	2.6	2.22	0.246	-1.2			0.732	0.606	-1.63	0.772	-1.49	-0.151	0.409
-1.12	0.436	-1.37	-0.105	-0.89	-0.314	1.33			0.0652	0.753	0.37	3.6	2.05	0.0256	-0.389			0.91	0.642	-0.753	-0.52	-1.14	0.973	-0.16
-0.901	-0.562	-0.563	-1.1	-0.999	-0.0765	-0.755			0.398	0.549	-0.307	1.65	1.38	-1.79	0.356			0.984	-0.952	-1.73	0.875	-1.42	0.596	-1.28
-0.301	0.839	-2.37	-0.121	-0.907	-0.115	0.783			0.413	1.23	0.0398	1.31	1.14	-0.371	0.344			1.61	-1.93	-1.92	-0.0735	-1.67	-0.202	-0.133
-0.099	0.149	-0.193	2.06	-1.14	-0.0196	-2.35			0.262	0.934	0.179	0.846	1.45	-0.698	-0.134			1.17	-0.67	-0.162	-0.452	-2.23	-1.12	-0.55
-0.265	-0.322	-1.71	0.718	-1.16	-0.525	-1.37			0.147	1.08	0.115	1.57	0.523	0.545	-0.471			1.46	-0.595	0.281	-0.238	-2.44	-0.868	-0.179
-0.528	-1.64	0.327	0.295	-0.797	-0.651	-0.121			-0.0786	0.72	0.0801	1.94	0.132	-0.95	0.84			2.3	-1.17	-0.0292	-1.26	-1.24	-0.243	-1.07
-0.82	-1.85	-0.0667	0.0816	0.16	-0.227	0.35			0.309	-0.183	-0.869	1.99	-0.68	0.163	0.748			1.67	-0.277	-0.879	-1.94	-1.03	-0.268	-0.494
-1.08	-2.5	-0.115	0.713	-0.351	0.748	-0.819			1.21	-0.286	-1.29	2.99	-0.869	-0.28	0.43			1.64	0.152	1.18	-2.49	-0.338	-0.696	-0.235
-0.926	-0.921	0.882	0.84	-0.627	0.0725	-1.56			0.998	-1.39	-0.665	1.45	-0.231	-0.338	0.199			2.02	-0.348	1.86	-3.23	-0.648	0.292	-1.31
-0.916	1.43	-1.06	0.554	-0.123	-0.152	0.207			0.723	-0.632	-0.569	1.96	0.185	-0.363	-1.53			1.65	-0.68	0.892	-1.4	0.0288	-1.28	0.198
-1.39	1.61	-1.6	-1.07	-0.895	0.0297	-0.163			0.555	-1.81	0.373	0.505	-0.135	0.964	1.31			1.49	0.317	-1.71	-0.218	0.603	-1.79	-0.558
-1.45	-0.639	1.09	-0.758	-1.21	-0.449	-1.75			0.654	0.408	0.108	0.741	-0.325	0.285	-0.947			0.853	-2.67	-0.712	-0.423	0.757	0.148	0.332
-1.43	0.899	0.0749	-0.251	-0.911	-0.903	-0.0302			1.42	0.217	-1.42	1.38	-0.432	1.39	-0.835			0.788	-0.569	0.849	0.723	-0.0269	0.0514	-0.136
-1.24	0.201	0.76	-0.59	0.345	-0.634	0.257			1.4	-0.128	-1.29	0.91	-0.489	0.689	-2.72			-0.234	-0.271	0.348	0.547	0.689	1.05	-0.383
-0.838	-0.883	-1.31	-0.324	0.374	-0.362	2.4			1.15	0.475	-0.285	0.539	-0.89	0.728	1.23			0.649	-1.14	-0.665	-0.0158	0.134	-0.667	-1.65
-0.662	0.76	-0.805	-0.793	0.466	-0.462	0.344			1.32	-0.624	-2.44	0.445	-0.902	-0.0775	-0.45			0.429	0.316	-0.486	0.262	-0.148	-0.481	-0.419
-1.11	-0.0663	-0.391	-0.707	0.638	-1.22	0.574			0.668	0.326	-1.78	0.565	-0.58	0.538	-0.416			-0.372	1.16	-0.565	0.462	1.09	1.36	-0.824
-1.08	0.238	0.64	0.0506	0.565	-0.417	-1.35			0.939	0.521	-1.62	0.609	-0.692	3.53	-0.954			0.822	-0.109	0.452	0.831	1.2	-0.805	-0.238
-1.21	0.733	0.129	1.09	0.0176	-1.05	-0.779			0.991	1.15	0.59	-0.263	-0.498	2.24	-1.73			0.253	0.361	0.968	0.826	0.821	0.683	-0.548
-0.922	0.558	1.99	1.04	-0.0129	-0.769	-1.06			0.657	-1.21	0.7	-1.25	-1.33	1.49	-0.209			0.403	-0.532	0.874	0.284	1.42	1.19	-0.949
-0.874	0.421	1.32	1.29	0.187	-1.4	-0.178			-0.567	-0.543	1.25	-1.02	-1.48	0.31	-0.145			0.801	0.277	1.11	0.182	2.05	1.29	-1.47
-0.556	0.125	1.24	1.59	-0.142	-1.24	1.09			-0.242	-0.258	0.505	-1.11	-1.07	-1.1	0.109			0.637	-0.962	-0.903	-0.673	1.86	0.443	-0.35
-0.458	-0.0413	0.338	0.955	-0.416	-0.544	-1.43			0.117	0.723	-0.586	-0.736	-0.485	0.149	-0.446			1.05	-1.07	0.24	-0.65	3.15	0.182	-1.38
-0.38	-0.43	-0.217	-1.23	-0.297	-0.62	0.605			-0.0719	0.0371	-0.117	-0.966	0.674	-0.0946	-0.668			-0.00369	0.157	-0.586	-0.722	2.2	0.123	-0.363
-0.967	-0.148	0.752	-2.73	-0.468	-0.475	-0.0636			-0.575	1.23	-0.199	-0.732	2.42	-0.317	0.473			0.389	1.21	-0.328	-1	1.99	0.0262	-0.859
-1.36	0.0753	1.05	-1.65	-0.148	-0.76	-0.852			-0.982	1.46	-0.145	-1.42	1.25	0.128	-0.514			-0.487	-2.57	-1.24	-0.916	1.45	0.889	-0.207
-0.836	-0.708	0.754	-2.3	0.0617	-0.795	-0.897			-1.15	1.1	-0.562	-1.42	0.702	0.412	0.346			-0.679	-1.37	-0.536	-0.208	1.67	0.882	0.409
-0.814	-2.15	-0.0188	-0.947	-0.156	-0.599	0.0596			-0.563	0.358	1.21	-1.92	0.135	-0.639	0.00145			-0.825	-0.57	-0.521	-0.499	1.85	-0.0733	-0.566
-0.425	-1.57	0.106	-1.41	0.134	-0.69	-1.3			-0.779	0.273	-0.449	-1.24	-0.195	-0.673	-0.59			-1.03	-0.747	1.04	0.513	0.753	-1.09	-1.32
-0.9	-2.65	0.822	-1.03	0.18	-0.137	0.897			-0.936	2.87	-0.248	-0.82	0.485	0.667	-2.18			-0.598	-1.25	-1.39	-0.0795	0.286	-1.21	-0.0246
-0.877	-1.19	0.753	-1.77	0.963	0.249	-0.658			-1.16	2.5	-0.732	-0.621	0.836	0.17	-0.976			-0.568	-0.748	-1.07	-0.215	0.564	-1.07	-0.273
-0.973	-1.34	0.768	-0.898	1.39	0.402	0.682			-1.11	2.4	-0.265	-0.633	1.14	0.161	-2.12			-0.646	0.37	-0.304	-0.444	-0.239	-0.721	-0.317
-1.08	-1.89	0.325	1.06	1.14	0.0359	-1.23			-1.88	2.17	1.03	-0.413	1.43	-0.382	-1.62			-1.02	-1.38	0.0645	1.14	-0.0609	-1.15	0.114
-0.934	-2.13	1.36	-0.584	1.09	0.651	-0.506			-2.23	2.3	0.732	-0.894	1.51	-0.421	-0.696			-0.439	-0.904	-1.81	0.716	0.0349	0.562	0.411
-0.462	-1.17	0.806	0.684	1.6	1.52	0.118			-0.744	1.38	0.0163	-0.548	0.91	-0.784	-0.79			0.323	-0.645	-0.601	1.35	0.498	-1.34	0.917
-0.549	-0.454	1.51	-2.04	1.29	1.29	-0.617			-0.382	1.04	0.24	-0.976	-0.301	0.249	-1			-0.0407	-1.28	-2.85	0.263	1.04	-1.7	0.931
-0.653	-0.997	1.91	0.0753	1.11	1.33	-0.798			-0.142	1.52	-0.695	-0.978	-0.463	-0.8	-1.12			1.59	-1.22	0.0845	0.647	1.39	-2.02	0.492
-0.556	-1.51	-0.0503	1.07	1.01	1.64	2.05			0.851	0.94	-0.798	-1.08	-1.11	-0.182	-0.713			1.14	0.135	-0.488	-0.466	1.22	-0.569	-0.312
-0.649	-1.21	0.253	0.0629	2.03	0.946	0.626			1.27	0.234	-1.35	-0.71	-1.55	0.648	-0.704			1.54	-1.51	-0.649	-0.477	1.06	-0.72	0.254
-1.11	-1.26	2.05	0.239	1.1	1.84	-1.3			0.98	0.29	0.0259	-0.614	-1.84	-0.43	1.12			0.938	0.317	-0.978	-0.969	0.965	-1.14	0.243
-1.05	-1.67	0.281	-1.14	0.815	1.41	2.12			1.34	0.286	-1.45	-0.514	-1.19	-0.636	-0.296			1.48	-0.942	1.06	-0.762	0.696	-0.935	0.827
-1.05	-0.107	1.13	-1.25	0.226	1.99	-0.269			1.38	-0.051	0.0748	-0.995	-1.03	-0.924	-0.0749			1.53	-0.551	-2.13	-0.756	1.75	-0.547	-0.144
-1.55	0.198	0.166	-0.52	-0.465	1.63	-0.789			1.31	0.247	1.66	-1.31	-1.61	-1.42	0.9			1.11	0.313	-2.76	-1.28	1.27	0.539	0.355
-1.5	-0.658	0.597	0.702	-1.1	1.71	-0.245			0.738	-0.161	-0.226	-1.62	-1.18	-0.93	-2.15			1.07	0.855	-0.756	-1.84	0.8	-1.13	0.751
-1.07	-1.7	-0.0894	1.21	-0.47	0.941	-1.56			-0.0284	-0.383	-0.843	-1.28	-1.36	-1.37	-0.869			1.27	0.129	-0.912	-2.03	1.08	-0.0258	0.564
-0.754	-1.81	0.943	-0.402	0.164	0.284	1.61			-1.01	-0.301	-1.25	-0.0561	-1.31	1.22	-0.925			2.16	0.661	-0.774	-0.785	1.2	-0.808	0.404
-0.411	-2.03	2.53	0.809	0.708	0.715	1.62			-1.13	0.25	0.4	0.532	-1.46	0.77	-1.94			2.56	1.73	-4.09	1.36	0.754	-1.16	0.466
0.348	-1.89	0.357	-0.555	1.15	1.81	0.376			-1.38	-1.33	-0.883	0.265	-0.993	1.2	0.209			1.33	0.115	-3.2	1.52	0.382	-2.12	-0.705
0.28	-0.608	0.939	0.286	0.933	0.793	0.315			-1.27	-0.738	-1.19	-0.0468	-1.13	0.59	-0.0798			0.725	-0.718	-1.27	1.28	1.68	-1.59	0.116
-0.25	-1.22	-1.28	0.0843	0.708	1.19	-2.56			-1.57	0.105	-0.236	0.557	-0.728	0.719	-0.424			0.351	-0.468	-1.7	2.96	1.42	0.84	-0.85
-0.504	-1.17	-0.44	0.809	0.11	1.16	-1.71			-1.18	0.198	0.152	0.605	-0.366	1.31	-0.41			0.539	0.772	0.562	2.09	1.34	0.168	-0.32
-0.535	-1.81	0.789	-0.485	-0.456	1.22	-1.33			-1.58	1.31	1.28	0.747	-0.445	1.97	-0.0246			0.639	-1.05	-0.607	1.67	1.18	0.653	-0.776
-0.00994	-0.709	0.52	1.99	-0.455	0.834	-0.303			-1.79	0.509	-0.623	1.38	-1.17	1.53	0.42			0.424	2.11	-0.105	1.43	1.25	-1.54	0.113
-0.326	-0.334	-1.32	0.968	-0.48	0.478	-0.597			-2.15	0.659	-0.376	0.97	-1.1	1.66	-0.893			0.36	1.77	-2.32	1.95	1.39	0.12	-0.648
-1.01	0.287	0.023	-0.0189	-0.828	-0.588	-0.153			-1.79	0.406	-0.279	0.387	-1.36	0.893	1.77			0.554	3.29	0.0196	1.31	0.331	-0.016	0.585
-0.626	0.748	0.844	-0.124	-1.26	-0.911	0.493			-1.67	0.811	-0.148	1.16	-0.743	1.04	-0.648			0.777	3.44	0.284	0.415	1.47	1.32	-0.19
-0.468	1.2	0.361	1.68	-1.38	-0.62	0.194			-1.68	0.986	0.872	2.08	-1.57	1.71	-0.92			0.17	1.73	-0.289	-1.27	1.91	2.63	1.17
-0.803	0.106	-0.1	1.81	-1.53	0.0134	-0.592			-0.164	-1.04	0.476	1.75	-1.71	2.01	-0.314			0.354	2.27	0.747	0.133	-0.19	2.62	0.607
-0.402	-0.379	0.539	-0.592	-1.56	-0.291	-0.253			0.342	0.312	0.0384	1.29	-0.937	2.53	-0.92			0.411	1.99	-0.872	-1.32	0.395	3.56	-0.561
-0.6	-0.466	2.43	-0.41	-2.4	-0.108	0.181			0.415	-1.24	0.153	1.07	-0.759	1.75	-1.1			0.745	1.12	-0.571	-0.605	0.712	0.843	0.0174
-0.514	0.744	1.09	0.662	-2.65	-0.116	-0.0433			0.583	-0.573	-0.77	0.845	-1.12	1.76	-2.2			0.176	2.09	-0.637	-1.3	-1.14	0.99	0.994
-0.0929	0.972	1.98	0.56	-2.26	-0.152	0.475			1.4	-0.619	-0.37	0.784	-2.04	2.3	-1.77			0.787	2.5	-1.36	-0.685	-0.992	-0.0514	0.998
-0.406	0.979	0.633	-0.319	-1.5	-0.571	2.38			0.679	-0.892	1.09	0.00309	-1.71	1.42	-1.55			1.49	1.79	-2.2	-1.14	-1.28	0.495	0.208
-0.844	-0.0164	0.377	-0.708	-1.16	-0.273	0.469			1.13	0.396	0.998	0.401	-1.25	2.22	-0.0998			0.732	1.63	-0.365	-0.54	-1.18	-1.27	0.389
-0.399	-0.792	0.781	-0.784	-0.357	0.409	-0.922			0.799	-1.18	-0.374	0.486	-1.89	2.67	-0.146			0.664	1.68	1.72	-0.943	-1.19	0.356	-0.629
-0.149	0.35	1.01	-0.142	-0.0234	0.0145	-0.345			1.04	-1.57	-0.554	0.089	-1.82	2.31	-1.08			0.44	2.84	-1.9	-1.35	-1.37	0.0499	-0.186
0.0908	-0.383	-0.586	-2.02	0.0704	-0.248	-1.59			1.74	-0.959	0.752	-0.518	-2.07	2.6	-0.288			0.708	1.95	-0.32	-1.2	-0.835	2.11	0.209
-0.853	-0.601	2.03	0.085	0.445	-0.0157	-0.531			0.948	-0.863	0.179	0.00591	-2.26	1.91	-1.68			1.1	1.53	-0.379	-1.46	-0.237	0.787	0.758
-0.628	-0.0999	0.349	-0.713	-0.00965	0.863	0.134			1.48	-1.07	1.2	-0.332	-1.39	2.41	-0.31			0.785	2.15	0.158	-1.39	-1.06	2.01	1.8
-0.831	0.315	0.67	-0.965	1.32	0.0785	1.39			0.684	-1.78	0.602	-1.1	-0.392	1.67	-0.00215			0.617	0.876	-1.15	-2.2	-1.13	0.875	-0.615
-0.508	0.543	-0.932	-1.53	1.84	0.733	1.6			-0.303	-1.98	0.276	-0.896	-0.0452	2.5	-0.0425			1.32	3	-1.21	-1.12	-1.4	0.305	0.433
-0.513	-0.212	0.509	-0.739	1.45	-0.116	0.873			0.231	-1.88	0.196	-1.17	0.292	2.31	-0.419			0.906	5.16	-1.16	-1.61	-1.03	0.453	0.154
-0.43	0.36	-1.71	0.232	1.18	1.04	-0.697			-1.05	-0.844	-0.0113	-1.57	0.0684	0.929	-0.656			1.23	2.01	1.39	-0.848	-1.18	-0.355	1.2
-0.96	-0.663	-0.245	-1.18	0.792	0.846	0.0655			-0.522	-0.992	0.67	-0.505	-0.297	2.23	-0.268			0.693	0.912	0.826	-1.98	-1.98	0.01	-0.0711
-1.04	-0.692	0.212	-1.33	1.66	-0.569	1.68			-0.0312	-0.727	0.82	-0.813	-0.764	1.71	-0.856			0.696	1.13	0.236	-2.02	-0.62	1.6	-0.00796
-1.25	-0.532	1.52	-0.531	1.37	0.236	3.31			0.824	-0.675	0.566	-0.241	-0.598	0.37	-0.193			0.452	0.251	-0.264	-1.2	-0.725	0.735	1.11
-1.66	-1	-0.692	-0.713	0.962	0.66	1.23			-0.325	-1.23	0.895	-0.54	0.662	0.986	0.228			1.05	0.351	1.06	-1.35	-0.188	0.892	0.729
-1.77	-1.75	-0.193	-0.375	1.02	0.589	-0.0598			-0.555	-0.581	0.438	-0.584	0.38	0.981	-0.447			1.05	1.34	0.608	-1.79	0.454	-0.446	-0.591
-1.1	-0.455	0.273	0.1	1.01	-0.412	1.11			-1.07	-0.407	-0.946	-0.382	-0.0632	0.827	-2.22			2.25	-0.499	-0.639	-1.97	0.172	-0.374	0.58
-0.751	-1.35	-0.303	-1.08	0.326	0.484	0.554			-1.54	0.584	-0.178	-0.662	0.726	1.13	0.0285			1.65	0.865	-0.0305	-1.37	0.314	-0.947	0.0422
-1.04	-0.563	-1.35	-0.191	0.722	0.141	-0.989			-1.14	0.275	0.0734	-0.319	0.618	-0.851	0.739			1.13	1.2	0.0115	3.41	0.141	-0.96	0.561
-0.435	-0.881	-2.37	-1.82	1.25	0.314	0.768			-1.21	0.201	0.439	-1.04	0.326	-1.11	-1.73			1.2	1.91	-0.589	3.5	-0.579	-0.734	0.877
-0.236	0.153	-0.905	-1.5	0.563	0.619	2.55			-0.546	0.899	0.978	-0.988	0.62	-0.935	-1.56			0.862	0.839	0.685	2.04	-0.746	-0.395	1.47
-0.155	0.346	-0.776	-0.28	-0.157	0.401	1.55			-1.14	0.92	-0.17	-1.3	0.419	-0.147	-1.85			0.903	-0.0861	-0.252	1.49	-0.0397	0.00664	0.0153
-0.515	-1.6	-0.588	0.956	-0.729	0.831	0.68			-1.36	1.76	-0.285	-0.917	0.375	-0.895	-1.15			-0.916	0.145	-1.55	1.78	-1.03	-0.762	-0.186
-0.37	0.324	-0.804	0.637	-1.53	0.728	2.74			-1.72	1.05	-0.595	-1.45	0.328	0.596	0.531			-0.199	-0.224	-0.634	1.34	-1.03	-0.806	0.392
-0.927	0.232	0.556	0.646	-1.6	0.372	0.805			-1.87	1.87	-0.915	-0.964	0.363	-0.0843	-2.74			-1.13	1.68	0.236	0.469	-1.18	-0.262	-0.679
-1.09	0.0348	0.195	1.39	-1.06	-0.0739	0.616			-1.22	1.87	0.128	-1.32	-0.186	-0.356	-0.224			-0.947	2.25	-1.64	-0.456	-0.0953	0.639	0.657
-0.901	-1.19	1.44	0.961	-1.05	1.03	0.111			-1.51	0.358	-0.282	-1.73	0.0529	0.331	-1.03			-0.796	1.22	-0.0937	-0.0407	-0.257	0.582	0.537
-0.577	-0.243	0.944	0.824	-1.33	0.428	0.516			-1.62	1.88	0.69	-1.04	-0.0799	0.208	0.33			-0.219	0.995	-1.01	0.0124	0.473	2.87	0.42
-0.00186	-0.468	1.31	0.958	-1.34	1.39	1.47			-1.41	0.929	0.167	-1.67	0.204	-0.625	0.075			0.0483	1.76	0.565	-0.424	1.69	2.11	1.03
-0.146	-1.03	0.286	-0.116	-1.57	0.328	1.96			-1.36	-0.351	0.338	-0.817	0.879	1.04	1.7			0.124	1.63	0.452	-1.36	1.35	3.95	0.00492
-0.354	-0.288	0.281	-0.49	-1.13	-0.207	1.87			-1.14	0.672	-0.546	-1.1	0.323	1.5	1.09			-0.302	1.62	-0.017	-0.533	0.554	3.15	0.999
-0.202	0.159	-0.897	-0.989	-1.71	0.971	1.95			-1.14	0.328	-1.33	-1.06	-0.28	1.25	-0.144			0.394	0.352	1.17	-0.557	0.863	3.37	0.502
-0.594	-1.56	0.645	-0.311	-1.31	0.6	0.616			-0.975	0.818	-0.176	-0.548	0.154	0.619	-0.932			0.409	-0.737	-0.896	-0.352	0.487	3.44	0.573
0.0425	-2.69	0.454	-0.422	-1.64	0.604	0.26			-1.11	0.84	-0.902	-0.99	-0.393	2.46	-1.47			1.04	-0.176	0.346	0.811	0.42	3.39	-0.793
1.35	-1.58	0.39	0.575	-1.31	-0.192	0.681			-1.06	-0.0605	0.878	-2.01	-0.162	3.38	0.467			0.271	-0.126	0.356	1.64	-0.663	3.38	0.62
-0.493	-0.995	-0.806	-1.43	-1.32	-0.114	1.32			-0.976	-0.365	1.57	-1.63	0.501	2.89	-1.55			0.0507	-2.07	-0.345	1.73	-1.41	4.31	-0.0263
0.0589	0.0369	-0.461	0.511	-1.13	-0.325	1.15			-1.3	0.311	0.91	-0.353	0.201	1.68	0.0278			0.674	-0.887	-0.231	0.833	-0.444	2.59	-0.578
-0.0754	-1.9	-0.493	-1.11	-1.56	0.189	0.728			-1.23	0.456	1.22	-0.123	0.209	0.566	-0.249			0.673	-0.924	0.249	-0.149	-0.526	2.32	2.19
0.478	-1.92	0.176	-1.62	-1.29	0.444	-0.0431			-1.01	1.07	0.684	-0.784	-0.0909	2.27	-1.49			0.231	0.752	-1.17	0.109	-0.499	2.08	0.322
0.246	-1.59	-0.636	-2.57	-1.73	0.37	0.76			-0.962	1.14	-0.788	-1.1	-0.31	2.91	-0.221			0.351	-0.491	-0.0693	-0.161	-0.978	1.36	0.0255
-0.0302	1.25	-0.279	0.333	-1.36	0.701	-1.59			-1.59	0.992	0.46	-1.22	-0.0914	2.16	-0.49			0.837	-0.503	1.01	-0.391	-1.18	2.57	1.08
-0.197	1.11	-0.502	2.73	-1.24	1.46	-0.597			-1.1	-0.453	0.816	-2	-0.442	1.65	-2.64			0.284	1.04	-0.972	-0.849	-1.44	4.15	2.57
-0.0843	-0.564	0.0164	5.21	-1.29	1.93	0.96			-1.3	-0.466	0.218	-1.41	-0.644	0.157	0.38			-0.381	-0.162	1.25	0.317	-1.18	2.15	1.35
0.168	-1.15	-0.764	2.79	-0.748	0.973	0.393			-1.36	0.151	1.54	-2.29	-1.18	0.779	0.266			-0.0223	0.624	-0.839	0.506	-1.69	3.12	1.07
0.211	1.43	-0.706	1.94	-0.773	-0.00721	-1.3			-1.93	-0.616	1.39	-1.62	-1.08	0.462	-0.413			-0.606	1.54	0.894	-0.0877	-2.05	3.81	0.625
-0.0212	-0.939	-0.318	0.885	-0.749	0.81	2.01			-1.97	-1.08	0.9	-1.51	-1.18	0.4	-0.863			0.635	0.637	0.634	-0.0571	-2.91	3.35	1.04
-0.312	-0.73	-0.835	0.623	-0.276	1.02	1.03			-1.17	0.0303	0.326	-0.973	-0.733	0.696	-0.382			1	0.558	0.089	-0.268	-2.8	1.42	1.28
-0.159	-1.56	-1.95	1.16	0.27	1.06	-0.212			0.584	0.264	-0.397	-1.28	-1.58	0.494	-1.26			1.36	1.98	-1.76	1.53	-2.27	4.77	0.993
-0.0702	-0.683	-1.25	0.983	0.142	0.86	0.0751			2.17	-0.389	-0.391	-0.98	-0.733	1.8	-0.956			1.01	0.59	-1.46	3.51	-2.21	2.76	1.41
-0.0311	-1.9	0.233	0.552	0.286	1.52	-0.659			2.84	0.00333	0.185	-0.682	0.778	1.13	-2.45			1.15	2.22	0.543	3.17	-2.56	2.29	0.263
-0.0961	-0.783	-2.36	1.21	0.223	1.21	0.785			2.54	-0.355	-0.73	-1.05	1.01	1.25	0.0976			0.733	1.82	-0.781	1.09	-1.64	3.03	0.17
-0.471	-0.498	-0.648	1.75	0.663	1.4	1.45			1.12	-1.14	-0.422	-1.42	1.21	3.35	-0.37			0.351	0.247	-0.534	1.99	-1.33	2.18	0.0219
-0.271	-2.02	0.37	-1.12	0.214	0.359	1.32			0.349	0.0715	-0.558	-1.52	0.66	2.51	0.138			1.12	2.68	-1.36	1.89	-1.02	4	1.43
-0.262	-1.18	1.24	-0.857	1.21	0.972	2.72			-0.265	0.119	-1.08	-1.54	0.309	1.84	0.273			0.19	1.86	0.0828	1.62	-1.42	2.59	1.3
-1.18	-0.516	-0.856	1.67	1.35	0.762	2.23			-0.422	0.029	-0.305	-1.27	0.806	1.19	-0.107			-0.284	0.0804	-0.202	0.968	-0.286	2.46	1.36
-0.399	1.78	-0.615	0.023	0.456	1.62	0.111			-0.544	-0.284	0.279	-1.79	1.12	2.16	0.193			-0.824	0.843	-0.75	0.314	-0.499	1.75	0.177
-0.943	0.854	-0.732	-1.21	0.396	1.41	-0.238			-0.747	1.7	-0.0217	-1.37	1.15	0.743	1.19			0.142	1.74	0.217	1.2	-0.347	2.57	1.24
-0.977	-0.144	-1.91	-2.26	-0.11	1.61	0.594			-0.632	0.435	-0.482	-1.83	1.27	0.359	-0.268			-0.829	-1.48	-1.72	1.47	-0.977	3.33	1.5
-1.46	0.13	-0.85	-0.997	-0.333	1.65	-0.874			-0.625	-0.0828	0.417	-1.7	1.98	0.893	-1.01			-0.815	1.73	-1.28	0.494	-1.07	2.63	0.401
-1.3	-0.418	0.229	-0.319	0.0523	0.931	0.981			-0.35	-0.893	-0.249	-0.763	1.45	0.857	0.35			-0.624	1.38	0.48	1.44	-1.89	1.55	0.734
-1.4	0.994	-0.987	-1.77	-0.121	0.82	0.473			3.29	0.242	0.627	-0.788	0.518	1.06	-0.208			-0.773	0.409	-0.199	1.49	-2.12	1.71	0.748
-0.74	0.246	-0.376	-0.357	-0.497	0.407	-0.791			3.89	0.327	0.0731	-0.526	0.364	1.41	-0.602			-0.213	1.86	-0.456	0.71	-2.6	1.55	1.94
-0.145	0.524	-2.38	-1.49	-1.13	1.08	-0.209			3.31	-0.127	0.177	-1.31	0.0798	1.57	1.48			0.132	1.87	1.58	0.775	-2.18	3.03	0.595
0.472	-0.461	0.439	-2.58	-1.67	0.421	-1.46			2.25	1.05	-0.525	-1.42	-0.372	0.316	-1.06			0.214	2.77	1.93	0.674	-3.08	2.99	0.505
0.186	-0.953	-0.484	-0.225	-2.35	1.12	0.71			1.92	-0.609	-0.043	-1.67	-0.628	0.415	-0.515			0.0232	2.37	0.0799	0.0164	-2.54	2.62	1.42
0.222	-2.65	0.536	0.242	-2.18	1.59	2.75			2.1	-0.324	-0.572	-1.99	-0.788	0.37	0.48			0.715	1.43	0.294	-0.00204	-2.09	2.55	0.776
-0.138	-0.609	-0.141	0.597	-1.16	1.36	-2.8			2	-0.816	-0.76	-1.68	-0.81	1.04	-2.16			1.46	2.35	0.852	0.102	-2.81	2.9	0.565
-0.306	-0.66	-0.702	-0.521	-0.759	0.611	-0.953			2.52	-1.6	0.141	-1.38	-0.843	-0.0133	0.525			1.4	1.04	0.949	1.6	-0.375	1.29	1.24
-0.247	-1.36	-1.31	0.504	-0.243	0.675	0.85			1.45	-1.76	0.585	-1.16	-0.013	-0.377	-0.495			1.29	-1.12	0.228	2.3	0.806	0.317	0.242
-0.487	-3.3	-1.37	0.577	0.00873	0.201	0.00665			0.393	-0.63	0.886	-1.1	-0.608	0.842	0.585			0.469	-0.284	1.06	1.34	-0.178	1.43	0.544
0.000729	-1.64	-1.07	0.0974	0.611	0.867	1.04			0.379	-1.32	0.89	-1.02	-0.729	-0.764	0.297			0.469	0.731	1.11	2.36	0.296	1.02	0.104
0.42	-0.597	-0.95	-1.67	0.625	0.224	1.54			0.459	-0.573	1.29	-0.569	-0.61	-0.34	-0.942			0.369	0.695	0.665	2.52	1.48	1.13	0.0865
0.629	-1.2	-0.836	-1.33	0.646	0.871	0.857			0.555	-0.873	0.288	-0.251	-0.497	-0.489	0.238			-0.259	-0.0324	1.21	1.29	1.03	3	0.608
0.714	-1.89	-0.14	-2.02	1.54	0.244	-0.402			-0.153	0.0298	-0.592	0.249	-0.575	0.871	0.097			0.463	-0.668	2.08	1.19	1.05	2.3	1.26
0.733	-0.13	0.538	1.24	2.66	0.0154	2.73			-0.456	-1.09	-0.828	0.855	-0.904	1.1	0.168			1.22	1	2.44	1.41	1.27	2.03	0.366
1.15	0.0234	0.633	6.33	2.54	-0.00342	0.354			-1.54	0.143	-0.399	-0.0368	-0.934	1.1	-1.7			0.244	0.593	0.345	-0.704	0.456	1.36	0.0941
0.865	0.709	1.64	4.75	2.1	0.837	-0.623			-1.55	0.107	-0.824	0.984	-1.62	-0.207	-0.0346			0.662	1.4	0.265	-0.175	1.04	1.79	-0.305
0.514	2.13	0.602	3.98	1.56	0.787	1.7			-1.75	0.406	-0.887	2.07	-1.4	-0.395	-0.239			0.854	0.187	1.07	-0.537	0.855	1.76	1.41
0.877	1.59	0.358	2.82	1.95	1.33	1.73			-1.89	0.204	-1.52	1.6	-1.74	1.86	1.21			0.647	1.38	1.53	-1.32	0.907	1.11	1.33
0.489	0.585	1.09	1.33	1.73	2	3.11			-2.19	0.437	0.178	0.696	-0.921	1.87	0.221			0.492	-0.854	-0.899	-1.77	0.882	1.37	-0.297
0.0781	0.536	0.828	2.27	2.86	2.78	1.07			-1.45	0.0171	-0.592	-0.0476	0.246	1.49	0.771			0.0958	-0.564	0.739	-1.61	0.58	2.95	0.241
-0.289	0.657	2.55	1.44	2.5	2.12	1.66			-0.944	0.699	0.678	0.505	0.676	3.84	0.563			0.976	-0.596	0.349	-2.15	0.581	2.25	1.49
-0.0763	0.956	3.16	2.37	1.82	2.03	0.205			-0.752	0.513	1.1	-0.365	1.26	6.06	1.16			1.1	1.9	0.931	-2.53	0.293	4.37	0.923
-0.111	-0.149	1.77	1.11	2.27	2.63	2.67			-1.26	-0.179	1.27	-0.787	1.21	4.75	0.578			0.648	-0.141	0.115	-2.84	0.6	1.28	0.679
-0.104	0.953	2.44	0.389	1.22	2.27	1.48			-1.9	-0.0737	1.54	-0.518	2.16	5.38	-0.107			0.152	-2.03	-0.378	-2.45	-0.198	1.29	1.63
-0.384	0.528	0.951	-0.743	0.594	2.12	-0.607			-1.94	1.37	2.16	-0.0185	3.6	5.76	1.09			-0.298	-4.73	-0.854	-3.35	-0.155	2.34	0.0748
0.326	2.08	2.35	-0.869	0.875	2.1	-0.0765			-2.24	0.0286	2.27	0.568	3.58	6.41	-0.144			-0.438	-2.74	0.481	-2.12	0.533	3.08	0.978
0.18	0.187	2.76	-1.13	0.0253	2.29	1.73			-2.43	-0.19	3.67	2.48	4.4	4.9	0.447			-0.501	-2.99	0.0499	-1.82	-0.139	1.68	0.788
0.209	0.902	1.34	-1.47	-0.856	2.48	0.746			-2.23	0.0477	3.36	2.76	4.26	3.01	-0.0497			-0.586	-3.96	0.862	-1.21	0.395	2.24	0.344
0.655	1.82	1.95	-1.69	-0.675	2.16	3.29			-1.51	-0.085	4.03	1.57	3.24	4.25	-0.352			-0.763	-2.9	0.784	-1.76	0.0798	1.62	-0.969
0.633	2.29	1.71	-2.18	-0.81	2.02	1.44			-0.684	0.216	4.33	1.32	3.45	3.99	0.0107			-0.75	-3.81	-0.185	-1.72	0.0138	3.13	0.405
0.453	1.48	1.38	-1.04	-0.917	1.91	2.06			-0.784	1.34	3.1	1.3	3.02	3.82	0.108			-0.466	-3.59	2.36	-1.08	-1.03	1.86	0.977
0.38	2.08	0.214	0.0866	-0.0533	1.97	-0.424			-0.61	-0.166	2.11	2.31	2.84	3.45	1.3			-0.432	-3.22	1.35	-0.574	-0.449	1.7	0.952
0.085	2.92	0.848	-0.554	0.299	1.29	-0.138			-1.04	0.416	2.44	2.13	2.8	4.53	-1.89			0.867	-1.44	1.04	-0.51	-0.0175	2.13	0.486
0.0795	3.88	0.363	-0.345	0.0668	1.89	0.328			-0.693	0.182	2.27	1.51	2.02	4.21	0.00721			0.681	-2.97	2.22	-1.7	-0.55	1.55	0.432
0.0235	3.13	1.56	0.403	-0.656	2.04	0.648			-0.86	1.38	2.97	0.914	1.76	4.32	0.349			1.46	-2.63	0.665	-2.68	-0.137	0.724	1.3
-0.357	3.6	1.58	0.417	0.0194	1.94	0.556			-1.09	1.99	1.22	0.778	1.64	2.51	-0.398			0.469	-1.73	5.11	-1.88	1.04	0.688	1.74
-0.185	1.09	1.88	-1.27	-0.172	0.835	1.32			-0.715	3.82	1.78	0.222	1.49	2.38	0.321			1.18	-3.25	1.43	-1.59	0.266	1.31	1.44
-0.322	1.98	0.209	-1.01	-0.419	1.58	-0.451			-0.118	2.74	1.94	1.46	1.55	3.43	-0.448			2.03	-4.07	1.21	-1.74	-0.541	0.742	0.984
-0.565	1	-0.144	-1.41	-0.478	1.04	0.997			-0.15	3.7	3.55	1.38	2.38	3.18	-0.0818			0.801	-2.8	3.08	-0.305	0.607	1.58	0.801
-0.541	0.336	0.993	1.04	-0.513	0.712	0.327			-0.234	2.48	3.29	1.16	2.38	3.01	-0.973			0.437	-2.03	4.43	0.748	-0.179	-0.241	-0.467
-0.798	0.936	1.55	-1.17	-0.57	1.38	1.41			0.23	2.84	2.55	1.46	2.27	2.86	-1.1			0.16	-2.29	3.51	0.667	-1.09	1.46	1
-0.987	-0.19	-0.147	-1.56	-0.507	0.89	-0.222			4.14	1.91	4.17	0.941	2.82	2.34	-0.577			0.957	-2.03	4.46	1.15	-1.23	2.28	1.45
-0.641	0.726	1.51	-2.47	0.0546	1.45	0.545			5.18	0.974	3.35	0.471	3.02	3.26	-0.0916			0.976	-2.32	3.29	0.356	-0.887	0.905	0.904
-0.59	0.518	0.586	-1.74	-0.0322	1.11	1.24			5.07	0.804	5.1	0.583	3.08	2.73	1.11			-0.0385	-2.03	4.59	-0.467	-0.786	1.37	1.06
-0.696	-0.0775	1.45	-2.81	-0.442	1.12	1.16			4.22	2.23	3.54	-0.26	3.36	1.2	2.02			0.274	-2.84	3.86	-1.84	0.227	-0.142	1.43
-0.997	1.78	1.41	-1.52	-0.619	1.78	0.954			3.7	1.86	4.65	-0.583	2.82	1.87	0.698			-0.231	-3.37	3.31	-1.63	-0.523	2.33	0.602
-1.12	3.15	1.05	-0.727	-0.463	1.52	-0.0334			3.26	0.0369	4.37	0.501	2.44	2.38	-0.953			-0.656	-2.18	1.72	-1.88	-0.0279	1.45	0.922
-0.929	2.43	0.0385	1.53	-0.5	0.813	-0.437			2.66	0.274	3.25	0.949	2.2	1.8	-0.576			-0.13	-1.88	1.83	-2.35	0.623	1.17	0.111
-0.896	2.02	0.695	-0.74	-0.323	1.55	-0.802			2.25	0.782	2.78	0.24	1.79	2.26	0.862			-0.382	-3.44	1.91	-1.26	0.294	2.42	-0.0678
-0.588	3.78	-0.0192	-0.157	-0.305	0.588	0.194			2.17	3.95	3.68	-0.529	1.27	1.09	-1.61			-0.907	-3.83	3.37	-1.27	-0.223	2.52	0.415
-0.53	3.77	-0.0273	0.789	0.637	0.663	0.411			2.1	4.95	3.15	0.0093	1.4	0.318	-1.72			-0.53	-2.83	2.64	-0.0629	0.482	3.52	0.463
-0.332	5.82	0.956	1.11	2.16	1.13	-1.34			1.37	4.27	2.67	0.699	1.13	0.919	0.128			-0.62	-3.82	1.59	1.56	1.04	1.35	1.12
-0.576	3.65	0.193	0.966	4.04	1.12	-0.714			1.37	3.22	3.1	0.78	1.21	2.04	1.06			-0.57	-0.974	5.96	4.16	0.432	2.83	1.14
-0.747	4.94	-0.65	0.732	3.74	1.17	1.39			0.665	4.28	2.08	0.839	1.94	3.28	-0.915			-1.55	-3.31	4.71	4.21	0.0773	-0.108	0.794
-0.927	2.96	0.862	-0.466	2.35	0.707	0.725			0.492	3.91	2.01	0.846	2.72	1.84	-1.08			-0.732	-2.92	2.35	4.36	0.204	0.944	0.239
-0.786	2.81	0.181	2.58	1.99	0.406	1.71			-0.134	2.99	2.16	0.704	2.43	1.87	-1.34			-1.64	-4.14	3.27	4.79	-0.406	-0.732	0.0044
-0.811	1.74	0.0107	2.28	2.15	1.04	-0.95			0.238	2.69	3.76	0.564	2.05	1.88	-0.605			-1.46	-3.08	4.2	6.69	-0.911	0.85	0.737
-0.697	1.73	1.57	3.45	1.2	0.595	-0.92			0.245	2.64	2.25	0.133	1.96	2.12	-0.789			-1.67	-4.85	5.03	5.54	-0.33	0.31	0.474
-0.932	1.47	-0.127	2.85	0.791	1.07	-1.32			-0.000281	3.34	3.74	0.301	1.1	1.71	-0.306			-0.483	-1.91	5.61	3.7	-0.667	0.872	0.388
-0.705	2.24	-0.858	2.98	0.169	0.648	-0.723			-0.437	2.42	3.54	0.316	1	1.32	-1.14			-0.13	-3.16	5.62	2.84	-0.442	-1.06	0.869
-0.641	0.929	-0.504	3.03	0.592	1.27	-1.36			0.0412	3.09	3.36	-0.257	0.402	0.582	-0.0247			-1.02	-0.0606	4.26	2.12	-0.595	0.826	1.29
-0.546	0.765	0.774	1.5	0.148	1.16	-0.861			0.0438	2.77	2.14	-0.00361	0.431	0.89	-1.52			-0.98	-1.19	5.3	2.62	-0.592	-0.354	0.329
-0.659	1.12	0.858	2.78	-0.318	0.889	-0.683			-0.156	1.09	2.69	-0.0245	0.764	1.6	-1.16			-1.56	-1.98	4.72	3.33	-1.44	0.0705	1.11
-0.774	1.83	1.13	3.26	-1.18	1.29	1.88			0.55	2.03	2.89	-0.0557	0.256	3.14	0.84			-2.15	-0.191	3.86	1.83	-0.486	-1.04	0.829
-0.764	3.38	0.128	3.6	-1.76	0.989	-1.42			0.638	2.11	3.26	0.0752	-0.0635	2.36	0.169			-1.82	-0.617	7.71	0.739	0.576	0.88	1.88
-0.707	2.96	1.27	3.39	-1.26	1.25	1.67			0.176	1.48	2.19	0.384	0.304	1.29	-0.72			0.72	-0.855	6.41	0.352	-0.889	0.825	1.72
-0.903	1.87	1.74	2.61	-0.846	0.436	-0.94			0.152	1.12	2.76	-0.169	0.621	1.96	-0.239			0.986	-0.601	6.47	0.448	-0.481	1.76	0.747
-0.71	1.54	0.73	-1.32	-1.02	1.5	2.3			0.379	-0.272	1.33	-0.00728	0.204	0.872	-0.332			1.16	-1.55	5.52	-0.608	-0.0418	-0.363	0.85
-0.345	2.73	0.607	0.208	-1.74	1.57	0.78			0.206	-0.0513	1.28	0.0403	-0.273	0.645	-0.12			0.841	-0.832	7.79	0.0384	0.562	-1.02	0.448
-0.453	2.73	2.12	2.1	-2.4	0.777	1.48			-0.276	0.709	2.86	0.0909	-0.335	0.278	0.725			0.568	-1.04	6.49	0.81	0.0325	-1.34	0.259
-0.428	1.18	2.06	1.91	-1.66	0.918	-0.163			-1.46	0.443	1.73	-0.0736	-0.733	1.06	0.045			0.598	-0.215	3.86	0.849	-0.36	0.311	1.16
-0.76	2.15	0.998	1.57	-1.32	0.601	0.575			-1.6	-1.16	2.03	0.804	-0.689	1.94	0.398			0.972	0.0357	6.62	0.486	-0.0533	-0.661	1.19
-0.577	-0.315	1.28	0.598	-2.14	0.133	0.418			-1.48	0.382	1.95	0.604	-0.207	3.47	-0.737			-0.523	-0.239	6.28	-0.0983	0.476	-0.249	0.908
-0.929	0.111	1.27	0.0566	-2.25	-0.726	-0.737			-1.36	0.0256	2	0.123	0.361	1.89	-0.33			-1.38	-1.08	6.27	0.187	0.000308	-2.59	1.6
-1.03	-0.277	0.997	-0.966	-2.36	-0.597	0.515			-1.16	0.641	1.02	0.361	0.533	4.45	-0.396			-1.5	-0.523	6.66	-0.862	0.196	0.488	1.18
-0.839	-1.22	0.903	-0.653	-2.49	-0.0119	-0.00818			-0.079	0.423	2.74	-0.121	0.507	3.79	-0.171			-0.811	-0.8	6.3	-0.0833	-0.759	-0.756	0.91
-0.828	0.0173	1.16	-0.898	-2.75	-0.194	-0.462			-0.425	0.71	1.24	0.0377	1.22	2.99	-0.749			-0.799	0.034	6.41	2.09	-0.465	-0.0274	1.04
-0.566	1.02	2.38	-0.819	-2.94	-0.44	1.48			0.41	2.01	1.58	-0.0383	0.773	4.17	0.669			-1.21	-0.514	6.15	6.91	-1.15	0.283	0.827
-0.759	2.7	2.64	-2.18	-2.27	-0.341	-1.14			-0.177	2.19	2.06	0.141	-0.47	2.64	-0.586			-1.2	1.25	6.82	5.27	-0.94	2.75	0.209
-0.627	2.17	2.05	-1.25	-2.72	0.209	-1.47			1.04	0.522	2.05	-0.559	-0.329	0.742	-0.255			-1.13	2.17	6.36	4.34	0.117	-0.811	1.14
-0.576	3.23	0.552	-0.0234	-2.39	-0.0302	-0.387			0.685	0.256	2.19	-0.175	-0.311	1.01	-0.0486			-0.0118	3.46	8.84	4.01	-0.129	-0.0555	0.187
-0.614	3.1	0.819	-1.83	-2.3	0.259	0.604			1.12	1.19	2.29	-1.35	-1.06	0.698	2.15			1.67	0.276	8.61	2.87	-0.647	-1.07	0.484
-0.847	2.32	-0.886	-0.794	-2.08	0.188	-0.413			0.972	0.0274	1.75	-1.91	-1.24	1.5	0.416			2.55	0.00151	4.41	1.87	-0.433	-0.778	-0.214
-0.797	1.9	1.84	-0.6	-2.2	0.09	0.551			0.989	0.778	1.88	-0.552	-0.99	0.823	0.898			0.962	-1.21	4.43	1.23	-0.563	-0.809	0.176
-0.523	1.44	0.24	-0.858	-2.38	-0.292	-0.941			0.456	1.69	1.69	-1.29	-1.18	0.985	-0.735			1.67	-1.07	5.45	0.921	-0.571	0.468	0.704
-0.438	0.601	0.936	-2.03	-2.1	-0.0443	-1.17			-0.131	1.44	1.06	-0.585	-1.55	0.787	-0.521			1.27	0.583	4.61	0.765	-1.06	1.66	-0.114
-0.684	2.33	0.129	-1.88	-2.28	-0.436	-0.592			-0.331	1.82	1.83	-0.871	-1.46	1.71	-2.69			1.08	0.289	5.54	1.98	-1.41	3.47	0.106
-0.354	0.628	0.446	-0.928	-1.99	-0.71	0.0272			0.00339	1.62	1.85	0.19	-1.25	1.01	0.371			0.762	0.157	6.1	1.96	-1.59	2.06	0.253
-0.409	-0.591	-0.127	0.776	-2.2	-0.551	-1.13			0.0803	1.93	1.65	0.476	0.519	1.67	0.23			0.933	0.148	6.49	1.92	-1.43	2.3	-1.01
-0.575	-0.567	-0.356	4.04	-1.8	-0.514	-0.605			0.278	0.761	1.32	0.678	1.76	1.17	1.48			0.0864	0.48	4.78	2.5	-1.6	0.876	0.565
-0.749	-0.861	-1.45	3.44	-2.22	-0.715	0.247			0.796	1.6	1.76	0.525	1.65	0.754	0.342			-0.929	0.224	4.43	3.6	-1.67	1.5	1.59
-0.729	0.316	-1.67	3.56	-1.91	0.653	0.662			0.672	0.11	1.84	0.5	2.12	1.78	1.74			-1.46	0.0433	6.35	4.5	-1.6	0.523	1.51
-0.45	0.325	2.03	0.406	-1.55	-0.366	0.615			0.696	0.505	-0.226	-0.105	1.37	0.0092	1.66			-2	2.3	5.41	2.13	-0.684	2.34	0.859
-0.663	0.799	0.162	-0.46	-1.92	-0.513	-0.327			0.574	0.749	1.26	-0.408	0.213	0.537	0.338			0.725	2.1	6.59	1.37	-0.177	0.49	0.738
-1.01	1.31	1.04	1.7	-2.14	-0.946	-0.0253			0.712	1.69	1.73	-0.542	-0.469	-0.225	-1.45			2.92	1.59	6.16	0.741	2.15	2.8	1.23
-1.17	0.264	1.48	0.306	-2.2	-0.897	0.0664			1.31	0.645	1.11	-1.11	-0.531	1.06	-1.94			2.35	0.639	7.03	0.617	3.61	-0.239	2.29
-1.24	-1.32	1.98	0.204	-1.94	-0.964	-0.373			0.813	0.187	0.185	-1.46	-0.76	1.23	1.67			2.49	0.797	5.15	0.95	3.17	0.866	2.2
-1.38	0.0758	0.915	1.2	-2.14	-0.452	-1.93			1.22	0.991	0.442	-1.12	-1.21	2.31	1.17			2.98	2.62	5.49	0.761	2.83	0.959	2.18
-1.15	0.273	2.04	-0.927	-2.53	-0.703	0.528			0.725	0.396	0.702	-0.327	-1.11	1.29	0.167			4.62	-0.51	4.99	1.16	2.13	0.673	1.24
-1.02	0.773	1.71	-0.394	-2.85	0.285	1.42			1.03	1.13	2.32	-0.753	-0.941	2.01	0.253			5.64	1.31	5.56	1.51	1.43	1.08	3.18
-0.541	0.471	2.02	0.246	-2.44	-0.496	-0.972			0.85	0.966	2.25	-1.34	0.21	1	1.68			5.17	-0.112	6.83	2.24	0.51	0.471	4.04
-0.596	1.14	2.12	-1.23	-2.49	-0.32	-0.0487			0.812	0.136	3.16	-1.08	0.472	2.02	1.18			6.89	0.805	6.74	0.835	0.154	-1.61	4.02
-0.844	-2.41	2.12	-0.559	-2.33	0.302	-3.22			0.711	2.09	2.82	-0.722	-0.457	-0.0493	-0.403			6.81	0.674	3.6	1.22	0.169	1.44	4.94
-0.928	-1.8	2.73	-1.18	-2.89	-0.0275	-1.71			0.458	2.02	1.84	0.11	-0.58	-0.238	0.824			8.49	0.0199	4.04	1.56	1.91	-0.266	4.55
-0.677	-0.215	1.21	-0.872	-2.42	0.254	-1.78			0.583	1.32	1.03	0.439	0.113	-0.364	0.676			7.81	0.408	5.21	1.23	2.24	0.375	3.78
-0.581	0.821	0.768	-0.853	-3.08	0.627	-0.82			0.638	0.307	0.211	0.0907	0.141	0.802	0.307			6.46	-0.0979	5.85	1.7	1.9	-0.23	3.59
-0.178	1.09	-0.273	-1.08	-2.89	0.617	-2.74			1.14	1.08	0.0437	0.819	0.0915	1.37	-1.69			6.1	0.952	7.89	-0.78	1.79	-0.5	3.47
-0.63	1.23	2.22	-2.42	-2.33	-0.35	-0.416			1.67	1.03	1.06	0.427	-0.373	0.704	-0.328			6.25	1.33	6.79	-1.04	1.59	0.377	3.94
-0.517	1.02	0.361	-1.51	-2.18	-0.638	-0.879			1.84	1.09	0.562	-0.687	-0.923	3.2	0.06			5.53	5.36	5.65	1.87	1.29	-0.0248	3.22
-0.798	-0.074	-0.282	-2.12	-2.09	-0.731	-1.73			1.32	0.0944	1.68	-0.0795	-1.24	3.21	0.0459			5.65	3.7	5.59	1.55	0.497	-0.0745	2.81
-0.814	1.16	-1.2	-0.321	-2.08	-0.0898	0.0344			1.36	0.112	1.23	0.437	-1.2	3.5	0.304			5.34	5.62	5.32	1.85	-0.241	-1.39	4.78
-0.837	0.714	0.132	-0.736	-2.15	-0.604	-0.0583			0.882	0.476	1.64	0.124	-1.02	2.74	2.49			4.84	4.25	5.66	1.84	-0.301	-0.767	3.77
0.0412	0.0155	0.683	-0.619	-1.71	-0.423	-1.4			1.41	1.03	1.33	-0.436	-1.12	3.13	1.11			4.27	3.52	3.67	0.572	-0.609	-0.326	1.87
0.258	0.538	0.876	-2.52	-1.06	-0.578	-0.98			1.54	0.0697	1.21	-0.622	-0.978	3.52	0.291			4.14	3.62	2.97	1.69	-0.158	-0.414	4.15
0.413	-0.742	-0.495	-2.31	-0.0473	-0.0913	0.289			1.33	0.47	0.185	-0.331	-0.981	1.81	0.0449			4.42	2.83	4.83	2.75	-0.773	0.607	4.08
0.0902	0.209	1.45	-2.49	-0.846	-1.11	0.0411			1.38	0.521	-0.254	-0.45	-1.17	1.03	0.78			3.26	2.32	4.82	1.92	-1.14	0.189	3.72
-0.0698	0.338	-0.402	-0.858	-1.48	-1.1	1.74			2.35	-0.17	2.33	-1.15	-0.856	1.68	0.702			2.64	4.44	5.46	1.78	-1.11	-0.453	2.66
0.186	0.165	-0.146	-0.621	-2.4	-0.0932	-1.47			2.82	0.604	2.35	-0.458	-0.658	2.03	0.512			1.67	3.72	5.5	3.49	-1.46	0.19	1.59
0.316	-0.943	0.211	-0.623	-1.56	-0.216	-0.991			4.1	0.173	2.4	-0.512	-0.229	1.95	1.27			0.966	2.71	6.45	3.87	-0.433	0.351	1.53
0.059	0.912	0.789	-0.922	-1.76	0.293	-1.01			4.34	0.533	1.96	0.0516	-0.938	1.62	2.13			0.911	3.92	6.02	1.75	0.21	-0.656	2.33
-0.144	1.08	1.27	0.345	-0.0238	0.578	-0.977			4.35	0.182	1.14	-0.152	-1.1	1.86	0.194			0.464	2.99	5.7	1.04	0.0474	-0.132	1.28
-0.204	1.85	2.6	-0.47	1.75	0.294	-0.668			3.79	0.0102	0.953	0.202	-0.598	0.608	1.45			0.889	1.59	5.87	2.4	-0.0659	-0.709	1.92
-0.578	3.2	0.134	-0.147	1.27	-0.142	-0.559			3.74	-0.638	2.08	0.775	-0.573	0.551	0.822			1.43	1.63	5.59	3.68	-0.358	0.127	2.63
-0.422	1.84	-0.19	-1.19	0.847	-0.337	0.0393			2.84	0.378	1.04	0.505	-1.17	0.891	2.18			2.13	2.03	4.65	2.95	-0.481	-2.72	2.17
-0.709	1.28	-0.235	-1.22	1.3	-0.174	-1.51			2.63	0.903	1.12	0.67	-1.21	1.07	0.354			2.43	2.54	3.8	3.12	-0.727	0.175	2.5
-0.793	0.393	-0.795	-1.41	1.02	0.196	0.116			1.47	-0.226	2.11	0.14	-1.16	1.13	1.46			2.3	0.706	4.45	2.08	-1.41	3.03	2.53
-0.849	0.717	-0.258	-2.39	0.658	0.0278	-1.31			1.52	0.639	1.76	-0.87	-0.865	2.92	1.66			2.42	-0.338	4.21	2.26	-1.49	3.4	1.54
-0.661	0.343	0.303	-2.25	0.348	-0.605	-1.26			1.69	0.862	0.0996	-0.0448	-1.61	2.76	-0.393			2.85	0.304	4.68	2.53	-1.46	2.81	1.76
-1.1	1.51	-0.75	-2.63	-0.0545	0.0523	-0.184			2.2	-0.675	0.169	-0.423	-2.11	2.13	0.824			2.72	3.87	3.87	1.74	-1.05	3.14	3.16
-1.45	1.5	-1.39	-2.33	0.872	-0.233	0.622			2.55	-0.203	0.904	0.29	-2.09	1.32	1.15			2.38	2.57	4.53	1.91	-2.22	3.19	2.33
-1.35	0.0676	-0.794	-0.879	2.94	-0.525	-0.179			2.66	-0.227	0.0805	-0.0856	-2.02	0.537	1.25			2.75	3.68	5.68	2.5	-0.889	2.73	1.66
-1.39	-0.488	0.0026	-0.682	2.23	-0.314	-0.0525			1.58	0.409	0.239	0.0409	-1.89	1.74	-0.499			2.21	0.851	5.45	3.01	-0.928	3.88	1.98
-1.66	0.795	-0.508	-1.61	2.1	-0.31	0.264			1.27	1.56	0.894	-0.578	-1.48	2.77	0.349			2.45	0.713	4.87	1.99	-0.479	3.28	0.917
-1.31	0.643	-1.89	-1.81	1.78	-0.601	-0.772			1.38	0.33	0.763	-0.167	-1.87	2.41	1.8			1.93	0.344	5.15	2.37	2.1	3.28	1.33
-1.45	0.256	-1.84	-1.59	1.07	1.5	0.431			1.01	0.758	0.776	0.0139	-1.61	1.42	1.36			3.39	1.97	5.35	1.33	2.29	3.03	1.23
-1.51	0.735	-2.39	-3.69	0.802	-0.0518	-0.859			1.05	1.22	-0.5	0.293	-1.28	1.69	1.31			3.06	2.41	6.03	1.13	1.12	0.909	1.52
-1.59	0.972	-1.8	-1.25	1.03	0.483	-0.794			1.54	0.465	0.182	-0.968	-1.22	1.64	0.266			3.15	1.08	4.98	2.23	1.69	1.39	-0.216
-1.57	0.458	-1.26	0.0996	0.735	1.08	-1.2			1.58	-0.61	0.723	-0.697	-1.29	1.62	1			3.09	3.25	4.21	2.24	1.84	1.13	1.48
-1.97	-0.611	-3.48	0.247	0.713	0.564	-0.323			2.09	0.131	0.861	-0.635	-2.02	1.15	1.53			3.31	2.1	4.48	2.65	2.15	0.451	1.45
-1.94	1.1	-0.0692	-0.462	0.694	-0.276	0.247			2.13	1.12	1.27	-0.394	-2.15	1.69	1.13			2.55	0.827	5.09	1.85	1.54	1.19	0.42
-1.55	0.72	0.249	-0.659	0.217	-0.762	0.92			2.33	0.86	1.2	-0.7	-1.51	1.46	1.54			2.51	2.28	4.52	1.87	2.93	0.64	0.415
-1.46	-0.124	-1.04	0.0487	-0.0153	1.04	-1.06			1.93	0.515	1.83	-1.2	-0.242	1.89	0.226			2.46	1.04	5.63	1.53	2.15	1.91	1.55
-0.906	0.719	-2.28	-0.559	-0.204	0.913	-1.02			1.64	2.14	0.783	-0.945	-0.295	2.59	-0.389			2.28	1.13	5.46	2.08	3.21	2.44	2.7
-0.495	-0.593	-0.796	-0.461	0.394	0.524	1.36			1.83	2.15	2.37	-0.687	0.377	1.92	1.6			2.54	2.2	7.59	0.747	3.43	0.686	0.614
-0.00325	-0.264	0.0624	-0.917	0.266	0.464	-1.07			1.5	1.66	1	-0.908	0.901	0.335	2.34			2.57	1.82	4.39	1.54	3.11	2.04	1.56
-0.319	-0.47	0.435	0.384	0.0796	0.139	-1.18			1.14	1.19	1.07	-0.738	1.49	1.28	1.52			3.06	2.93	4.81	1.29	2.18	2.32	0.758
-0.557	0.107	1.33	-0.851	-0.412	-0.366	0.645			1.36	0.869	0.0773	-0.912	0.879	0.79	-0.651			4.26	3.41	4.99	1.61	3.98	1.82	0.976
-0.582	-0.0114	-0.757	-0.546	-0.634	-0.743	-0.258			1.76	2	0.687	-0.679	0.394	1.22	1.12			3.52	0.855	5.71	0.812	5.43	1.04	0.946
-0.813	-1.25	-0.426	-0.586	-0.678	-0.637	0.115			2.08	2.4	1.56	-1.14	-0.282	-0.64	0.0274			3.41	1.28	6.87	0.944	4.6	1.61	2.47
-1.41	0.0508	-0.185	-1.2	-0.747	-0.891	-3.03			2.54	1.61	0.476	-1.16	-0.376	1.3	1.06			2.69	1.81	6.04	0.499	4.86	0.239	2.93
-1.83	0.0795	-0.0555	-2.55	0.234	-0.395	-0.613			1.93	1.09	0.892	-0.95	-0.449	0.754	-0.836			2.39	2.66	5.77	1.3	3	-0.0681	3.05
-1.26	0.39	0.582	-3.21	-0.826	-0.227	-0.288			1.34	1.45	0.695	-0.946	-0.394	-0.76	0.898			3	0.518	5.08	2.63	3.12	-0.629	2.04
-1.09	1.2	-0.466	-0.279	-0.768	-0.141	-0.371			2.41	0.852	0.0377	-0.322	0.423	0.492	1.27			2.99	0.939	5.81	2.29	3.14	-1	1.28
-1.35	0.523	0.0423	-1.31	-0.587	-0.461	-1.56			2.18	1.49	-0.438	-0.588	0.92	0.168	-0.673			2.25	2.94	5.78	2.25	1.78	-0.598	1.67
-1.34	-0.627	-0.869	-0.961	-0.951	0.0744	1.12			2.71	2.08	0.569	-0.542	0.0768	0.776	1.17			2.44	0.499	4.75	3.28	2.3	0.491	1.56
-1.17	-0.327	-0.489	-0.93	-0.764	-0.00345	-0.582			2.85	2.18	-0.61	-1.01	-0.119	0.947	0.486			2.25	2.07	5.15	1.59	1.77	1.35	1.68
-1.23	0.259	-1.07	-1.55	1.18	0.944	-1.5			2.68	2.03	-0.0043	-0.694	0.0411	0.54	1.52			2.12	1.6	6.02	1.29	2.17	0.341	0.69
-1.47	-0.782	-1.83	-2.22	2.69	0.0798	-1.14			2.27	1.86	0.92	0.44	0.33	1.62	0.983			2.75	2.78	5.64	3.05	0.917	1.05	1.43
-1.48	-0.261	-2.01	-2.7	2.13	-0.0875	0.427			3.4	1.98	1.17	-0.584	-0.238	-0.298	3.14			2.04	1.58	6.14	2.4	0.925	0.547	1.86
-1.28	-0.415	-1.32	-2.79	2.4	-0.421	0.0191			2.95	4.05	2.36	-1.46	-0.882	1.75	2.29			2.17	2.7	5.97	2.99	0.924	0.955	2.22
-1.26	-1.72	-0.874	-2.4	2.67	0.0517	0.828			2.31	4.79	1.5	-1.62	-1.26	-0.388	1.41			2.45	1.05	6.08	2.67	0.968	0.138	1.62
-1.14	-1.47	-0.827	-2.11	2.41	-0.98	0.0528			2.22	3.15	1.62	-0.0372	-1.6	1.18	1.17			2.83	0.301	7.81	2.38	0.854	1.16	2.71
-1.03	1.35	-0.692	-1.38	3.05	-0.826	-0.0834			2.05	3.67	1.28	0.211	-2.3	0.628	-1.02			4.38	-0.73	5.94	2.78	1.33	1.19	1.46
-0.606	-1.25	-2.18	-1.9	3.37	-0.274	-0.538			2.01	4.9	1.75	-0.105	-2.51	0.786	0.672			2.81	-0.424	8.37	2.23	0.985	0.95	1.73
-0.712	-0.963	-1.28	-1.47	3.84	-0.767	0.0713			1.55	3.83	2.49	-0.803	-2.55	1.16	1.54			1.98	-0.206	6.77	2.6	1.79	1.12	1.98
-0.814	-0.449	-0.753	-1.98	4.12	-0.0455	-0.0862			0.9	3.5	1.98	-0.0146	-2.03	0.962	1.7			2.06	0.201	6.71	1.34	0.853	-0.00933	1.21
-1.23	0.256	-0.176	-0.24	2.47	0.185	0.235			0.276	2.98	1.56	-0.167	-1.65	1.1	1.79			3.17	0.471	6.05	1.6	0.374	-0.708	1.21
-1.26	-0.309	-0.982	-0.347	1.73	-0.354	-1.54			0.623	3.09	1.3	-0.165	-1.12	1.03	1.64			2.61	-1.43	7.92	1.61	0.37	1.55	1.02
-0.891	-0.317	0.157	-0.977	2.09	-0.694	-2.06			0.452	1.59	0.986	-0.768	-0.362	1.39	1.09			2.35	0.208	6.88	2.06	0.583	-1.12	1.5
-0.831	-0.288	0.607	-1.57	2.41	-0.71	0.625			0.777	0.594	1.95	-1.29	0.115	0.522	2.02			3.67	-2	6.34	1.46	-0.0932	0.00209	0.955
-0.721	-0.981	0.481	-2.4	2.04	-0.287	-0.981			1.14	1.81	1.68	-0.78	0.928	0.762	2.85			3	-1.02	6.26	2.53	0.512	1.04	1.82
-0.411	-0.802	-1.83	-2.13	1.46	-0.125	-0.381			0.877	0.803	1.79	0.0776	-0.344	0.378	0.761			2.94	-1.45	6.01	2.24	0.125	0.968	1.6
-0.697	-0.476	-0.715	-2.45	0.595	-0.379	-0.693			1.48	0.957	0.681	-1.43	-0.226	0.294	3.01			2.77	-0.917	8.32	1.99	0.78	0.513	2.22
-1.11	-0.0809	-2.05	-0.947	0.64	-1.06	-1.07			1.06	2.34	2.14	-0.311	0.101	-0.21	2.7			2.87	-1.55	7.11	1.67	0.579	0.0392	1.68
-0.999	-0.613	-0.346	-1.8	0.552	-1.06	-0.67			0.985	1.18	0.706	-0.087	-0.254	-0.255	0.967			2.7	-1.55	7.46	1.84	0.228	1.33	1.43
-0.923	-0.174	-0.538	-1.98	0.535	-1.08	1.91			1.38	1.31	1.22	1.08	-0.352	0.446	1.99			2.2	-1.71	8.03	1.92	0.151	1.39	0.464
-0.816	-0.441	-2.35	-2.77	0.399	-1.3	-0.557			0.972	1.48	0.598	0.425	-0.399	-0.639	1.2			1.58	-2.06	7.14	1.69	-0.479	-1.68	2.4
-0.544	-0.0837	0.0577	-3.23	0.79	-0.608	1.34			1.06	1.51	-0.107	0.775	0.0432	-0.0885	2.41			1.69	-1.54	7.2	1.85	0.102	-0.328	2.7
-0.485	1.52	-0.579	-2.21	1.49	-0.257	-1.65			0.74	1.59	-0.694	0.497	0.0916	1.08	1.44			1.54	-1.23	8.68	3.12	0.484	0.625	2.01
-0.403	0.349	-2.21	-1.73	0.401	-0.147	-0.508			0.253	2.31	0.472	-0.131	0.7	2.28	0.889			1.05	-0.54	6.48	4.64	0.773	-1.63	1.12
-0.88	-0.181	-1.92	0.0733	1.06	-0.177	-1.41			-0.426	2.45	1.48	-0.383	0.307	1.66	1.03			1.25	-1.07	8.08	3.45	0.391	1.05	1.32
-1.04	-0.024	-0.912	1.25	2.24	-0.387	-0.931			-1.1	2.03	0.822	-0.198	-0.148	2.08	2.79			1.36	1.45	5.6	3.68	1.15	-0.247	2.32
-1.19	-1.44	-0.969	2.58	2.23	-0.204	-1.85			-1.91	0.355	0.43	0.505	-0.0729	0.824	1.89			1.67	-0.227	6.41	2.16	2.09	1.83	2.28
-0.771	0.212	-0.391	1.03	2.03	-0.383	-2.57			-1.59	0.289	0.646	0.671	-0.48	1.15	2.62			1.92	0.054	6.96	1.89	1.51	0.8	1.64
-0.467	0.184	-0.384	0.982	2.22	0.121	-0.967			-0.297	0.297	0.444	0.923	-0.00157	0.817	1.99			1.62	0.0463	6.73	1.47	1.29	1.32	1.21
-0.661	-0.75	-1.03	0.539	2.03	-0.0212	0.0714			-0.0509	0.603	1.32	0.0498	-0.0359	1.22	2.68			1.63	-0.0835	8.11	0.701	1.55	-0.0419	2.74
-0.535	-0.294	-2.48	0.455	3.99	-0.676	-0.0458			-0.517	-0.752	-0.234	0.395	-0.23	1.38	1.19			1.94	-0.431	8.37	1.12	1.17	-0.753	2.04
-0.338	0.619	-1.76	2.16	4.45	-0.734	-1.4			0.543	0.725	0.205	0.899	-0.386	1.67	1.79			1.7	-0.629	9.54	0.532	1.88	0.27	2.47
-0.714	0.549	-1.46	0.849	4.18	-0.0822	0.207			0.527	0.645	0.74	0.53	-0.207	0.447	0.395			1.3	1.14	5.59	-0.0247	1.97	-0.813	1.87
-0.769	0.104	-1.32	-1.08	3.9	-0.654	-1.07			0.569	0.0181	1.68	0.226	-0.706	-0.0847	2.42			1.63	0.903	5.98	0.291	0.716	-0.273	2.26
-1.02	0.724	-1.41	-0.207	4.19	-0.0184	-0.176			0.758	0.455	1.86	0.0637	-0.704	-0.153	1.14			1.42	1.31	7.34	-0.211	1.55	-0.734	2.15
-0.639	-1.14	-1.75	0.0313	3.68	-0.782	-0.894			1.09	0.0311	1.27	0.946	-0.166	1.84	2.51			2.75	1.41	6.83	1.07	1.08	-0.64	1.85
-0.409	-0.552	-1.83	0.828	3.18	0.0317	-0.00833			1.62	0.187	1.07	0.512	-0.778	3.26	0.787			3.49	-0.795	5.96	0.437	0.354	-1.52	2.17
-0.588	1.47	-1.35	1.13	2.94	-0.132	-0.816			1.09	0.117	1.94	0.851	-0.947	2.79	2.55			3.03	0.037	6.56	-0.351	1.61	-1.06	1.62
-0.961	0.594	-0.523	0.301	3.66	-1.2	0.123			1.18	-0.331	-0.131	0.142	-1.1	4	2.16			3.1	1.11	7.34	0.423	2.82	-1.3	1.78
-0.978	1.38	-2.01	-2.14	3.89	0.189	-0.606			1.43	-0.936	-0.00788	0.114	-0.787	3.15	2.81			2.17	1.02	6.05	0.182	2.56	0.413	1.35
-1.14	1.36	-1.5	0.205	4.47	-0.29	-2.09			0.749	-1.65	0.109	0.175	-1.2	2.86	2.6			2.64	-0.126	6.22	-0.137	2.23	2.4	1.11
-0.946	0.106	-0.728	-0.0954	4.69	-0.278	-0.498			0.678	-0.723	0.0142	0.055	-1.34	4.65	2.9			2.15	0.327	6.6	0.198	1.59	-0.0788	1.13
-0.858	-0.0783	0.5	-1.48	4.39	-1.08	0.0955			-0.0705	-0.0793	0.0279	-0.801	-1.1	3.23	0.907			1.71	-0.153	8.58	-0.341	1.07	-0.129	1.65
-1.04	-0.59	-1.1	-1.07	4.44	-0.365	-1.45			0.077	0.0237	1.04	-0.981	-0.66	3.55	0.622			2.1	-0.241	7.8	-1.41	0.344	0.922	1.22
-0.886	1.76	-0.379	-1.03	4.1	-1.42	-0.622			0.171	0.086	1.13	-1.05	-0.551	2.32	2.84			2.61	-0.0194	5.76	-0.916	1.21	0.451	1.57
-0.341	2.25	-0.18	-1.25	3.85	-0.914	-2.73			0.372	-0.526	1.1	-1.08	-0.00359	1.64	2.43			3.06	0.397	5.71	-1.4	0.052	0.264	1.49
-0.829	0.407	-1.13	-1.63	3.78	-1.11	-0.264			0.963	0.385	0.0969	-1.21	-0.311	1.81	0.656			3.11	1.92	6.37	-1.24	1.03	-0.995	0.0546
-0.991	0.142	-0.368	-0.608	3.35	-1.3	-0.225			1.61	-0.0383	-2.23	-1.47	-0.72	3.39	1.15			4.39	0.443	6.68	-1.89	0.865	-0.408	1.13
-1.03	0.0189	-3.62	0.219	3.59	-1.13	-2.52			1.41	-1.55	0.115	-1.2	-0.593	3.47	1.76			3.17	-0.19	4.45	-1.43	1.3	0.779	0.657
-1.04	0.203	-4.52	-1.21	2.89	-0.993	0.321			1.62	-1.01	-0.631	-1.97	-0.653	2.68	1.62			3.09	3.18	5.31	0.638	1.32	-0.134	0.598
-0.969	-0.805	-1.51	-0.106	2.23	-0.47	-1.43			1.58	0.416	-0.00734	-1.02	-0.803	2.58	1.2			3.41	2.97	4.87	0.186	1.19	1.19	0.597
-0.306	-0.927	-1.43	-0.312	1.83	-0.921	-0.71			1.77	0.167	0.504	-1.67	-0.543	3	2.02			3.15	2.17	5.71	-1.95	1.67	1.22	0.68
0.662	-0.281	-1.14	0.455	1.79	-0.734	-0.43			1.53	1.1	0.734	-1.43	-0.352	3.93	1.99			3.24	4.62	6.61	-0.265	2.01	0.603	1.56
0.633	0.565	-1.19	-0.361	1.5	-1.39	-1.69			1.95	0.386	1.17	-1.94	0.206	3.91	2.18			3.7	3.72	5.22	-0.49	1.49	2.64	0.677
0.99	0.96	-1.39	-0.956	1.09	-0.884	-1.12			2.34	0.318	0.606	-1.65	0.637	3.22	1.93			3.84	3.89	4.82	-0.394	1.66	1.36	2.22
0.527	1.65	-2.35	-0.67	0.898	-0.78	-1.54			1.96	1.91	1.29	-1.68	1.02	2.72	1.15			2.93	2.9	4.11	-1.64	1.55	0.145	2.09
0.0189	1.08	-1.31	-1.38	0.907	-0.893	0.709			2.75	0.994	1.46	-1.55	0.821	2.1	1.8			3.4	3	5.29	-0.868	2.27	1.24	0.208
-0.139	1.78	-1.89	-1.67	0.333	-0.621	-0.474			2.67	-0.715	0.996	-2.17	0.958	3.89	1.69			2.55	4.43	6.69	-1.25	1.75	3.53	0.947
0.441	-0.173	-0.196	-1.78	0.381	-0.401	0.553			1.57	1.8	1	-1.5	0.714	3.73	2.05			1.93	4.93	6.77	-1.68	1.5	3.71	1.15
0.67	0.0791	-0.0715	-1.08	0.000122	-0.886	-2.49			1.68	4.1	2.24	-0.842	0.677	2.41	1.87			1.99	4.42	5.13	-0.932	1.88	3.95	0.736
0.85	-1.08	-1.96	-1.38	-0.0654	-0.567	0.223			1.78	5.27	1.58	0.0646	0.233	3.1	0.888			2.01	5.46	7.47	-0.769	1.35	4.02	2.1
0.741	-1.49	-1.43	-1.41	-0.406	-1.05	-0.387			1.73	3.29	1.38	1.04	0.407	3.64	-0.175			2.04	4.26	7.94	-1.56	0.835	3.72	1.62
0.601	-1.76	0.243	-2.22	-0.766	-0.468	0.136			1.09	4.2	0.153	-0.145	0.457	3.05	1.39			2.43	4.22	6.01	-1.65	1.58	4.38	1.54
1.82	-0.168	-0.39	-2.42	-1.17	-0.151	0.635			-0.00467	3.55	1.64	-0.865	0.113	3.68	2.09			2.86	2.55	4.63	-0.196	1.32	4.63	2.14
3.45	0.971	-0.899	-0.388	-0.774	0.955	0.219			0.288	4.29	1.03	-0.462	0.466	4.01	2.22			2.85	3.16	6.32	0.912	1.15	4.49	0.934
3.31	0.78	-0.296	-1.31	-1.12	0.932	-0.0945			0.0262	3.18	1.03	0.0955	-0.116	3.09	3.35			2.07	3.93	3.74	0.386	1.29	3.48	-0.646
3.4	-0.544	-1.07	-1.45	-1.39	0.147	-0.101			0.26	3.29	0.641	-0.213	0.0392	3.04	0.528			2.81	3.46	7.47	0.545	0.727	1.48	0.596
3.25	-1.71	0.00157	-0.404	-0.823	0.707	0.451			0.091	1.35	0.341	0.867	-0.23	2.83	3.61			3.17	3.78	6.13	0.569	0.964	3.25	0.028
2.95	-1.36	-1.75	-1.51	-0.955	-0.2	-0.519			0.525	2.07	1.25	0.471	-0.584	3.36	1.19			3.7	2.93	6.43	0.184	1.34	2.93	1.27
3.21	0.217	-2.99	-1.72	-1.46	-0.508	1.07			0.691	0.888	0.0128	0.807	-0.231	4.27	1.39			2.91	4.23	6.58	1.34	0.939	1.63	1.34
2.92	0.0455	-1.85	-1.83	-1.78	-0.56	-0.532			1.22	1.03	0.518	0.117	0.29	3.47	1.23			3.49	2.06	5.66	1.76	0.885	3.21	1.66
2.69	1.46	0.85	-0.823	-2.23	-0.592	-0.389			1.73	1.34	1.28	0.0669	1.21	2.02	1.63			3.23	3.24	5.93	0.737	0.949	1.86	-0.246
2.25	2.27	-1.93	-0.947	-2.23	0.0136	0.694			2.21	1.56	0.879	0.525	1.41	3.18	0.829			3.03	2.24	7.12	0.61	0.996	1.81	0.985
2.35	0.811	0.288	-1.59	-2.03	-1.25	-0.741			2.73	1.56	1.5	0.873	0.617	2.63	1.07			2.88	2.1	4.2	0.98	1.12	0.804	0.848
2.14	0.425	-0.726	-1.24	-1.91	-0.485	-0.754			2.35	0.764	1.15	0.545	0.501	3.74	0.607			3.03	1.11	6.33	1.23	0.499	0.57	1.55
2.22	0.853	-1.61	-0.949	-1.41	-0.157	-0.476			2.43	0.888	-0.18	0.689	0.623	2.27	1.23			2.99	2.28	5.34	0.405	-0.164	1.8	0.121
2.18	0.358	-0.508	0.0655	-1.2	0.293	-0.759			2.31	0.665	-0.467	0.495	0.492	3.22	1.25			2.21	2.22	6.38	0.324	-0.829	0.199	-0.125
2.13	0.747	-0.336	-0.672	0.0797	-0.753	0.207			1.42	0.0876	0.655	0.199	0.319	3.6	0.438			2.94	2.76	5.98	1.03	-0.228	1.93	0.438
1.9	1.48	-1.04	-0.76	0.718	-0.852	-0.473			1.45	0.991	0.0915	0.249	0.369	2.97	2.66			2.78	0.276	4.84	1.14	0.292	1.54	0.503
1.89	0.0417	0.463	-0.24	1.43	-0.471	1.32			1.34	1.94	1.27	0.152	0.338	3.52	1.48			3.16	3.28	6.33	0.129	1.55	2.01	-0.00869
1.55	0.813	1.08	0.0775	2.35	0.841	-1.13			0.976	1.17	1.58	-0.153	-0.21	3.3	-0.119			2.41	2.2	5.86	-0.0089	1.04	4.21	1.27
0.485	1.99	0.0313	0.4	1.14	0.236	0.625			1.23	0.579	-0.605	0.28	-0.127	3.25	0.993			2.01	2.12	5.06	0.284	1.72	4.15	-0.0627
0.475	0.807	-0.613	1.51	2.35	0.112	-0.687			1.08	-0.142	-0.0502	1.37	-0.0417	4.19	2.03			1.82	0.884	5.56	-0.377	1.32	3.94	-0.576
0.451	0.802	-1.03	0.528	2.62	0.212	-1.07			1.61	0.439	0.964	0.455	-0.0272	2.46	1.78			1.56	1.63	5.38	-0.0649	-0.402	2.64	0.729
0.976	0.846	-0.657	-0.0322	1.82	0.881	2.07			1.66	-0.209	1.74	-0.154	-0.0718	1.83	0.965			2.06	3.37	3.96	-1.2	-0.212	4.23	1.67
0.97	1.02	-2.39	-1.3	1.21	1.43	0.0263			1.7	2.23	2.08	-0.0553	0.0163	1.94	2.1			1.68	1.88	5.48	0.373	0.802	3.37	0.434
1.6	-0.264	-1.11	0.535	1.59	0.3	-0.00904			1.06	0.764	0.0816	-0.106	-0.0488	3.09	1.3			1.1	3.18	5.67	1.32	1.73	3.54	0.363
1.56	1.17	-0.792	-0.285	1.76	1.38	0.462			1.54	0.4	0.355	-0.367	0.00182	2.54	0.981			1.46	2.17	2.63	1.86	1.28	3.45	1.11
1.91	-0.341	-1.25	-0.0762	2.05	0.758	0.941			0.0652	1.09	0.937	-1.31	0.312	4.26	0.711			1.92	3.57	5.45	0.623	0.198	2.52	0.659
1.84	-1.06	-0.341	-0.835	2.37	0.419	2.03			0.0818	-0.000502	1.95	-0.349	-0.43	3.74	0.807			3.75	2.96	4.18	0.961	0.914	1.01	0.0717
1.64	-1.58	-1.26	-0.0411	2.6	-0.418	-2.59			0.823	-0.363	2.44	-1.25	0.000475	3.17	1.17			3.59	2.36	7.09	2.47	1.67	1.79	1.14
1.27	-1.55	-0.719	-0.953	2.13	0.353	0.504			0.47	0.55	2	-1.04	0.404	2.23	0.055			3.86	4.4	4.71	0.638	2.33	1.12	0.855
1.14	-0.729	0.654	-0.823	1.83	-0.0356	-1.32			0.666	0.0463	0.95	-0.313	0.255	2.45	2.12			3.27	3.6	4.79	1.19	2.4	4.23	0.71
1	-1.47	0.207	0.0317	2.93	0.229	-0.969			0.684	1.11	-0.543	-0.722	0.424	3.53	1.04			2.82	2.47	3.69	1.51	1.72	4.75	0.322
0.943	0.126	0.554	-0.859	2.96	-0.189	0.146			0.594	1.34	-0.172	0.341	0.556	3.66	2.17			2.44	1.05	3	0.667	1.25	6.74	0.684
1.23	0.307	-0.748	-1.49	2.97	-0.388	0.567			0.76	1.21	0.0376	0.151	0.317	3.95	1.88			2.28	1.27	4.95	0.959	0.501	5.5	1.23
1.91	2.58	-0.335	-1.41	2.82	0.642	0.549			0.347	1.14	1.02	0.0369	0.913	2.29	1.16			2.99	1.41	4.32	1.36	1.09	4.49	1.26
2.08	2.31	-0.239	-2.21	2.74	0.256	0.219			0.234	0.513	0.375	-0.0374	-0.0898	1.64	0.312			3.36	2.82	6.14	0.0493	1.08	4.74	1.47
2.2	2.32	-0.105	-2.69	2.57	-0.162	-0.36			0.204	1.41	1.89	0.862	-0.0765	1.47	-0.722			3.02	3.03	6.72	0.874	0.399	3.6	0.351
2.63	2.01	-0.638	-2.46	2.5	-1.09	-2.13			0.482	0.822	1.3	0.42	-0.279	1.5	1.97			3.72	0.724	5.21	0.679	0.0756	2.67	1.52
2.84	0.364	-0.555	-2.49	1.63	-0.632	-0.547			0.605	1.02	1.61	0.389	-0.918	1.2	0.512			2.77	1.52	5.17	2.03	-0.349	3.79	0.579
2.69	0.571	-0.458	-1.48	1.73	-0.386	0.866			0.996	0.417	2.15	-0.0178	-1.49	2.04	0.44			2.02	2.2	4.9	1.43	-1.28	3.5	1.84
2.71	-0.739	-1.12	-0.0976	0.715	-0.431	-0.291			0.957	0.847	1.82	-0.589	-1.28	0.0959	1.78			3.63	0.753	5.44	1.31	-0.521	4.3	1.51
1.98	-0.638	-1.36	3.16	1.92	-0.185	0.308			0.791	0.646	1.32	-0.37	-1.57	0.486	1.4			4.06	2.77	5.82	1.84	-0.907	4.22	1.43
2.05	-0.883	-0.559	1.68	1.98	-0.51	-0.4			0.557	0.151	1.18	-0.546	-1.56	1.12	0.944			2.62	1.69	3.3	1.34	-0.327	4.18	1.82
1.68	-0.12	-0.264	2.15	1.15	-0.659	-1.19			0.456	0.496	-0.000784	-0.0802	-0.836	0.205	1.28			3.88	3.1	3.62	1.61	0.914	5.33	2.18
1.39	-1.4	-1.33	1.52	0.683	-0.623	-0.415			1.48	0.0221	1.36	-0.671	-0.74	0.869	0.431			4.54	4.15	3.85	1.07	1.31	6.19	1.89
1.54	-1.84	-1.04	2.64	0.475	-1.04	-1.35			1.66	0.539	0.395	-0.352	-0.684	2.41	0.646			2.7	1.82	3.33	0.496	1.24	3.79	1.24
1.75	-1.5	0.397	3.22	0.275	-1.42	-1.48			1.57	-0.615	0.712	-0.517	-1.39	2.1	-0.474			3.8	0.828	5.19	1.24	2.2	3.98	2.57
1.68	-0.56	-0.592	3.34	0.0111	-1.2	0.514			2.26	0.234	1.66	-1.47	-1.61	1.66	0.224			3.9	2.83	3.86	-0.178	0.787	1.18	4.04
1.35	0.354	-0.906	2.5	0.191	0.668	0.599			2.47	-0.0608	2.2	-1.32	-1.08	3.34	0.312			3.39	3.1	6.07	0.737	0.22	3.22	2.9
1.34	-0.0862	-1.37	1.12	-0.277	1.91	-1.42			3.09	-0.0526	0.75	-1.09	-0.74	2.27	0.301			3.25	3.93	2.66	-0.04	0.337	3.76	3.06
1.46	-0.147	-0.162	0.696	-0.307	2.47	-0.798			2.73	-0.38	0.419	0.652	-0.214	1.41	1.18			1.6	2.07	0.977	0.0069	0.723	2.54	3.1
1.18	-0.458	-0.823	-0.259	1.38	1.93	-1			1.47	-0.393	0.377	-0.262	-0.253	1.64	-0.3			1.43	2.6	1.67	-0.0726	1.93	2.8	2.03
1.36	-1.01	-1.6	-0.82	2	1.36	-2.24			1.27	0.12	1.13	0.0469	-0.518	1.73	0.986			1.1	2.9	2.61	1.55	4.17	2.43	2.13
1.21	1.09	-0.573	0.529	0.592	1.73	0.735			1.25	0.414	0.682	0.0804	0.268	1.38	0.353			1.26	2.96	2.7	0.412	3.94	2.61	2.39
0.618	-1.15	2.17	-1.32	1.49	1.26	-1.33			1.06	1.55	1.37	-0.391	0.524	1.29	0.458			1.45	1.88	3.16	0.485	3.53	4.14	2
1.47	0.517	0.227	-0.388	1.19	0.867	-0.00802			1.63	0.634	1.03	0.328	0.401	1.38	0.731			0.71	2.94	2.19	0.758	3.44	3.02	1.29
2.12	-0.00432	-0.14	-1.5	0.49	2.06	-1.94			1.94	0.126	0.765	-0.759	0.702	2.54	1.06			0.555	2.12	2.08	0.259	2.17	1.86	1.66
2.44	0.0937	-0.13	-0.626	0.307	1.02	-2.63			1.52	0.136	0.43	0.215	0.661	2	-0.228			1.22	3.67	3.31	-0.697	1.73	3.02	3.65
2.8	0.996	0.271	-1.31	-0.559	1.43	-3.12			1.02	1.18	-0.1	-0.48	0.206	2.39	0.761			1.03	1.96	4.71	0.508	0.96	2.19	2.49
2.17	0.874	-1.73	0.347	-1.09	1.43	-1.82			1.18	0.897	1.05	-1.12	0.166	2.07	0.438			1.12	3.65	4.55	1.08	0.457	1.55	1.93
1.93	0.344	0.432	-0.876	-1.21	0.704	-1.27			0.751	0.501	0.094	-0.653	0.362	0.508	0.0834			1.98	3.58	3.2	0.86	-1.29	3.38	2.44
1.58	-1.17	1.31	0.0145	0.304	0.456	-3.42			0.152	0.956	-0.00786	-0.287	0.481	2.76	-0.296			3.35	2.34	3.28	-0.17	-1.45	0.857	2.18
2.01	0.534	-1.63	0.0572	0.144	0.515	-2.47			0.74	0.235	0.351	-0.00236	0.658	3.63	0.602			2.55	0.573	3.21	-0.208	-1.02	1.01	1.82
2.3	-1.19	0.241	-0.409	0.319	0.923	-3.23			0.562	0.609	0.352	0.72	0.617	3.76	0.139			2.13	3.39	2.43	0.245	-0.959	1.58	0.901
2.46	0.0371	0.549	-0.158	0.73	1.4	-1.4			1.19	-0.0611	-0.102	-0.282	0.405	2.43	-0.743			2.43	2.95	2.23	0.331	-1.03	0.88	1.41
3.34	-0.235	-0.959	-0.426	1.11	2.38	-1.9			1.13	-0.963	0.695	-0.404	0.217	2.58	0.257			1.83	2.24	3.12	0.253	-0.618	0.806	2.74
4.6	-1.04	-0.644	0.15	1.4	2.93	-2.31			1.19	1.76	0.123	0.0281	0.343	1.04	1.17			2.53	0.775	0.848	0.63	-0.267	0.899	3.79
4.36	0.268	-0.82	0.139	1.22	3.09	-1.11			0.959	1.32	0.995	-0.897	0.468	1.89	0.478			2.6	1.52	1.78	1.04	-0.808	0.441	4.04
3.35	0.575	0.0122	-1.41	1.39	1.95	1.07			1.25	2.35	-0.107	-0.582	0.224	2.5	0.466			3	2.12	3.45	0.679	-1.32	1.39	2.64
2.56	-0.271	0.0349	-0.225	0.827	2.54	-0.554			1.14	1.06	-0.768	-0.567	-0.104	2.65	-0.172			2.62	2.29	5.18	0.591	-0.526	1.64	3.66
2.4	0.794	-0.658	-0.922	1.02	1.72	0.0296			0.471	0.861	0.881	-0.17	-0.266	1.82	0.923			1.81	3.01	3.38	1.14	-0.89	1.95	4.47
2.46	0.469	-0.231	0.171	1.18	1.6	-1.05			0.886	1.04	0.302	-0.545	-0.39	3.68	0.0967			0.51	1.65	4.25	0.523	-0.941	3.44	3.18
1.93	-0.315	-0.167	2.3	1.18	1.8	-2.32			2.17	1.26	0.447	-0.223	0.0164	2.9	0.00217			0.649	1.88	3.42	-0.456	-0.876	2.95	2.95
1.28	1.67	0.579	0.963	0.461	1.33	-2.08			2.19	0.636	0.388	-0.525	-0.478	3.19	1.16			3.09	2.58	1.84	0.458	-0.032	4.1	3.55
1.65	1.39	0.231	2.48	0.325	0.445	-1.55			2.4	0.591	0.328	-0.92	0.0816	1.95	0.346			4.44	2.69	4.76	0.162	-0.381	3.64	1.78
1.82	1.51	0.592	-0.202	0.222	0.381	-4			1.41	0.293	0.229	-1.5	0.139	2.37	1.13			5.67	2.47	2.6	0.723	-0.192	5.36	3.78
1.6	1.23	-0.71	0.755	0.311	0.733	-0.316			1.51	0.0051	-0.0741	-2.07	0.107	3.27	0.253			4.46	2.99	3.36	0.122	-0.169	3.74	2.24
1.48	0.205	-0.376	0.781	0.0391	1.44	-1.79			1.33	0.527	0.0731	-1.09	0.204	2.96	3.37			3.8	2.81	3.39	0.143	-0.131	3.35	2.89
1.07	-0.0755	0.565	1.36	0.699	1.51	-0.92			1.65	0.692	-0.257	-1.47	0.163	3.34	4.3			3.93	2.16	4.15	0.621	0.322	5.14	3.1
1.15	-1.42	1.04	2.8	1.14	1.16	-0.917			2.26	-0.371	1.25	-1.3	0.544	2.37	1.01			3.93	-0.323	4.06	0.604	0.517	5.65	2.85
1.95	-0.315	0.739	1.75	1.46	1.09	-0.269			2.5	0.423	0.996	-1.37	0.00381	3.32	2.28			3.83	0.326	4.53	0.66	-0.379	5.71	3.15
2.04	-1.42	-1.4	-0.0561	1.04	0.928	-2.52			2.05	-0.224	0.568	-2.24	0.461	2.21	2.26			4.35	0.175	2.52	2.12	0.668	4.97	3.42
1.85	-1.25	-1.49	0.768	-0.124	0.43	-1.77			2.26	0.0396	0.203	-1.89	0.698	2.4	1.72			3.56	1.39	2.47	1.83	1.36	4.17	3.45
1.78	-0.802	-0.921	0.944	0.399	0.576	-3.22			2.11	0.348	0.326	-1.76	0.506	1.53	1.79			3.46	2.51	1.41	1.42	1.99	4.13	3.55
1.97	-0.163	-0.144	0.657	0.295	1.97	-1.71			2.75	1.24	-0.716	-2.07	0.483	2.89	2.18			3.59	1.61	2.7	0.542	1.07	4.24	2.8
1.58	-1.25	0.186	-0.294	0.868	1.39	-1.38			3.28	0.238	0.276	-1.85	0.336	3.67	1.15			4.22	1.81	2.87	0.447	1.66	3.98	2.9
1.24	0.977	-1.32	-0.513	0.32	1.13	-2.24			3.56	-1.45	0.177	-0.922	0.451	3.46	1.16			3.73	1.14	2.86	0.796	1.4	3.81	2.11
1.28	0.869	-0.694	0.233	-0.0772	0.597	-1.58			3.1	-0.0867	-0.125	-0.356	0.236	3.61	1.26			3.29	3.07	1.64	0.0487	0.342	1.91	2.58
1.07	1.69	-1.49	0.7	-0.21	0.838	-1.2			3.64	0.474	0.88	-0.332	0.427	2.58	-0.26			2.97	0.757	2.31	0.947	-0.46	2.9	1.7
1.14	1.67	-2.49	0.281	-0.273	0.784	0.525			4.59	0.351	-0.698	-1.01	0.376	3.69	0.964			2.12	2.87	1.95	0.813	-0.486	0.282	3.11
1.29	1.32	-1.53	-0.315	-0.281	0.48	-2.93			3.93	-0.27	0.338	-0.782	-0.244	3.4	1.13			1.18	1.85	1.88	0.786	0.788	1.36	2.11
1.34	2.59	-1.01	-0.352	-0.529	1.43	-2.37			3.36	0.833	-0.0168	-0.191	-0.282	2.52	0.917			2.34	2.9	0.468	0.518	0.157	0.802	2.71
1.1	1.95	-1.42	0.599	-1.1	1.23	-0.0355			3.76	1.03	0.243	0.0321	0.563	3.48	1.64			2.73	1.87	2.49	-0.572	0.026	1.46	3.43
1.67	1.95	-1.64	0.0381	-1.57	0.98	-3.09			3.43	0.244	0.743	0.327	0.64	2.41	2.26			3.44	2.07	4.18	-0.463	0.651	0.419	3.62
1.55	3.06	-2.47	0.272	-2.27	1.41	-2.49			3.4	-0.225	0.674	-0.398	0.265	2.68	1.62			3.37	0.669	4.83	-0.642	1.39	0.151	2.42
1.78	0.134	-2.36	-0.731	-1.96	1.41	-1.61			3.06	0.187	0.748	-0.968	-0.282	3.07	2.1			3.58	2.28	3.69	0.418	2.32	-0.17	2.17
1.58	2.32	-1.25	0.574	-2.38	1.47	-1.19			2.72	0.348	0.594	-1.32	-0.54	1.76	1.24			3.88	1.4	3.93	3.16	1.94	-0.998	2.71
1.48	1.75	-1.58	-0.388	-3.32	1.04	-0.602			2.86	-0.656	1.15	-1.05	-0.22	3.24	-1.19			3.9	1.58	3.35	2.5	2.28	-0.875	3.04
1.09	2.36	-0.999	-1.29	-2.87	0.0619	-0.371			2.34	-0.291	-0.29	-0.407	-0.565	1.92	1.71			4.25	1.49	3.14	2.26	0.663	-0.271	2.27
0.769	0.829	-0.726	-0.604	-1.88	0.985	-1.46			1.95	1.06	0.815	-0.37	-0.944	1.55	-0.136			3.68	0.821	4.4	1.85	0.833	2.33	2.66
0.661	-0.0409	-1.11	-1.23	-2.59	1.81	-2.15			1.77	0.818	-0.684	-1.18	-0.928	2.27	1.03			3.25	2.01	2.18	0.947	-0.564	1.19	4.63
0.534	-1.19	-1.14	-0.449	-1.87	3.35	-1.65			1.69	1.21	-0.433	-0.713	-0.807	4.22	1.69			1.85	0.0488	3.57	0.974	-0.456	0.741	2.47
0.843	0.339	-3.01	-0.797	-1.06	4.12	-3.37			1.77	1.72	1.18	-1.4	-0.513	3.19	2.21			1.89	1.33	4.2	0.569	-0.97	-0.328	1.87
0.688	0.184	-0.753	-0.706	-0.893	3.64	0.32			1.72	1.17	-0.191	-0.471	-0.15	4.46	1.88			2.08	1.89	2.91	1.66	-0.974	-0.331	2.53
1.04	0.927	-1.12	-0.425	-0.413	3.88	0.67			1.78	-0.314	-0.12	-0.747	-0.707	2.21	2.73			2.25	2.35	5.26	1.87	-1.61	-0.511	2.01
0.696	1.97	-1.52	-0.000133	-0.123	3.6	-1.06			2.16	-1.74	-1.2	-0.56	-0.23	2.51	2.14			1.71	1.98	4.15	2.37	-0.84	0.968	1.85
1.08	1.28	-2.1	1.45	0.224	3.24	-1.76			1.9	-0.717	0.516	-0.0279	-0.445	3.11	1.08			0.752	1.43	2.02	0.938	0.585	-0.698	1.85
1.24	1.85	-0.24	0.505	2.02	3	-0.439			2.15	-0.626	-0.506	-0.71	-0.454	1.93	1.81			0.567	1.3	4.19	1.36	2.02	-1.07	2.09
0.971	1.45	-0.445	0.678	2.01	2.52	-1.81			1.94	0.0646	-0.24	-0.27	-0.607	2.45	1.98			0.431	1.57	2.29	-0.344	2.53	-1.53	2.4
0.534	-0.173	-1.25	0.845	1.87	1.61	-0.669			2.35	0.263	-0.214	-0.0273	-0.538	2.04	-0.194			0.193	3.02	4.13	0.138	3.07	-0.764	1.73
0.387	1.31	-2.26	0.245	0.781	1.9	0.718			3.11	-0.939	-0.507	-0.0567	-0.617	1.71	0.352			1.34	2.06	5.09	-1.35	2.54	-0.226	2.23
0.286	0.623	-2.77	1.84	0.421	2.4	-2.35			2.9	-1.05	-1.17	-0.119	-0.535	1.32	-0.251			1.84	1.43	2.69	-0.938	2.31	-0.293	3.78
0.16	0.722	-3.59	0.477	0.712	2.62	0.247			2.36	-0.662	-0.0481	-0.734	-0.307	1.05	-0.656			2.19	0.87	3.31	-1.22	2.78	0.501	1.77
0.0931	-0.121	-2.54	0.326	0.378	1.86	-0.756			2.23	-1.81	-0.087	-0.0883	-0.796	2.01	1.81			2.93	1.95	4.52	-1.09	2.36	0.501	3.41
0.475	0.455	-1.2	-1.74	0.107	1.54	-2.59			2.5	-0.705	-1.04	-1.28	-0.445	1.21	-1.17			1.57	2.53	5.22	-1.02	2.09	0.502	2.45
0.806	0.86	-1.37	-1.31	-0.875	2.23	-1.71			2.97	0.336	-0.374	-1.42	-0.739	1.04	0.973			0.856	1.74	4.93	-1.37	1.69	-1.3	2.66
0.96	0.593	-1.51	-2.46	-0.188	2.09	-0.512			3.92	-0.0337	-1.07	-1.59	-0.561	2.07	0.611			1.18	2.49	3.65	-1.02	1.33	-1.38	2.55
0.826	-0.229	0.0719	0.629	-0.316	2.23	1.31			2.95	-0.0298	-0.818	-1.84	-0.294	0.691	2.17			0.0269	0.152	4.36	-0.398	1.65	1.6	2.33
0.676	-0.48	-1.27	-0.558	-0.309	1.54	-1.3			2.98	0.748	-1.04	-0.937	0.0454	1.07	1.23			0.233	1.67	5.12	0.377	4.5	1.5	2.67
1.07	-0.271	-1.79	0.932	0.829	1.85	-0.199			2.48	0.332	-0.123	-1.28	0.385	2.9	1.77			0.799	2.81	3.72	0.735	4	-0.549	2.31
1.14	0.737	-3.13	0.371	2.5	1.67	-1.69			2.9	-0.221	-0.0581	-0.316	0.452	3.36	1.21			1.97	1.64	5.36	0.721	3.7	0.097	2.5
0.714	-2.08	-1.31	0.244	1.73	2.93	-1.8			3.26	0.0842	0.236	-1.13	0.785	1.52	1.01			2.83	1.44	3.69	-0.0275	3.73	1.48	2.45
0.792	-0.0521	-0.866	-0.658	1.46	2.54	-1.57			3.53	0.641	1.18	-1.2	0.702	0.934	1.23			2.91	2.28	3	1.09	3.48	2.41	1.91
1.41	-0.0588	-0.71	-0.0689	1.08	2.23	-1.65			3.82	-0.392	-0.463	-1.43	0.882	1.08	1.66			3.33	1.85	5.17	0.756	1.83	1.56	2.68
1.34	-0.0975	-1.73	-0.785	0.85	2.3	0.267			3.7	0.128	-0.397	-0.964	0.449	1.45	-0.0807			2.79	1.72	4.74	1.77	1.63	0.824	2.93
1.46	0.132	-1.04	0.0572	0.267	1.72	-0.498			2.91	-0.0907	-0.0385	-1.22	0.262	1.91	-0.516			1.04	2.64	4.46	0.923	1.4	2.74	1.61
1.26	0.633	0.209	0.476	-0.354	1.74	0.428			1.98	-1.21	-0.763	-0.882	-0.067	1.85	0.527			1.33	0.828	3.76	0.472	1.32	2.3	1.6
1.02	-0.6	-0.529	0.493	-0.388	1.45	0.661			2.17	-0.207	0.783	-1.05	0.215	2.25	0.907			0.87	2.02	1.97	2.9	0.563	0.711	2.43
0.499	-1.06	-2.86	0.663	-0.434	0.959	-0.727			2.14	0.607	-1.36	-0.717	-0.056	2.44	0.5			1.91	1.84	2.76	0.659	0.0661	0.505	2.49
0.389	0.0479	-0.986	0.626	-0.123	1.52	-1.39			2.56	1.68	-1.48	-1.24	0.26	2.36	-0.106			2.16	1.95	4.96	0.759	0.729	0.132	0.799
0.276	-0.473	-0.728	0.102	0.185	1.4	0.133			2.66	1.34	-1.06	-1.53	0.311	4	1.88			1.68	2.05	3.15	1.45	0.406	-1.03	1.91
0.12	1.48	-0.0328	0.413	0.388	0.929	-1.98			1.67	1.68	-0.6	-0.758	-0.134	2.59	1.56			2.56	0.637	3.83	2.5	0.109	0.0783	1.26
0.705	0.414	-0.752	0.336	1.58	1.9	-3.06			2.21	1.38	-0.642	-1.08	-0.0239	2.33	-0.0986			1.34	0.65	2.96	1.99	-0.239	-0.167	2.01
0.758	-0.0855	0.424	0.175	1.93	1.96	-0.478			1.9	1.33	0.152	-1.33	0.455	1.71	0.538			0.952	1.34	2.97	1.41	-0.896	0.313	3.88
1.03	-0.168	-0.181	0.881	0.907	0.844	-0.000468			1.73	2.14	0.455	-0.666	0.664	1.91	-0.845			0.173	-0.592	1.65	1.9	-0.559	0.621	2.75
0.854	-0.257	0.525	-0.251	0.376	1.44	0.865			2.27	1.79	0.0467	-0.0516	0.377	2.11	1.07			0.987	0.488	4.27	2.65	-0.885	0.674	2.15
0.718	-0.895	-2.01	-1.02	0.0298	2.06	-2.08			3.22	0.301	-0.576	-0.283	0.793	2.73	2.27			1.16	3.45	0.383	1.95	0.0851	0.223	2.52
0.393	-0.32	-0.679	-0.438	-0.713	1.8	-1.71			2.63	-0.457	-0.929	-1.21	1.04	1.86	2.26			2.25	-0.198	0.148	2.27	-0.687	0.836	3.67
0.625	-0.992	-0.169	0.329	-0.428	1.92	-0.194			2.21	-0.398	-0.952	-0.906	0.418	3.1	3.15			2	0.609	-1.32	0.623	0.58	-0.447	2.57
0.694	-2.59	-1.38	1.07	-0.676	1.92	-0.809			2.12	1.05	-1.57	-0.35	0.373	2.64	0.273			1.99	1.55	3.46	1.03	-0.294	0.436	3.55
0.942	-1.29	-0.3	0.415	-0.786	1.34	-3.18			2.68	0.262	-1.06	-0.258	0.457	3.35	0.846			1.6	0.941	2.45	0.932	-0.953	0.874	2.53
1.16	-1.19	0.527	-1.25	-0.578	0.87	0.513			3.04	0.351	-1.61	-1.14	0.0615	2.35	1.79			1.48	1	5.01	0.478	-0.734	0.376	2.27
0.786	-0.983	-1.42	0.233	-1.07	1.33	-0.447			3.09	0.256	-1.13	-1.15	-0.0513	2.9	2.01			1.07	0.667	5.81	0.669	-0.0251	0.329	2.65
0.107	-0.748	-0.0497	0.315	-0.861	0.956	0.189			2.54	1.08	-0.618	-0.849	-0.805	2.35	2.59			0.999	1.08	2.18	1.43	-1.2	1.41	3.35
-1.04	-0.751	-0.14	1.12	-0.338	0.602	-2.5			2.2	-0.531	-0.348	-0.0481	-1.07	2.58	1.75			0.989	1.15	3.47	0.658	-1.44	5.11	2.07
-1.72	-2.61	-1.05	0.485	-0.705	-0.113	1.63			1.84	0.0149	-0.386	-0.204	-1.01	1.89	1.61			1.05	1.07	4.07	0.334	-1.97	5.3	2.43
-1.08	-2.35	0.119	-0.812	-0.584	0.516	0.381			1.7	-0.087	-1.58	-0.795	-1.18	1.34	0.768			0.74	-1.02	1.91	1.26	-2.21	5.21	1.67
-1.29	-1.59	-0.415	0.215	-0.0959	0.988	-1.08			1.84	-0.206	-1.54	-0.198	-0.529	1.68	1.51			1.22	1.15	1.95	1.21	-1.72	4.55	1.27
-1.9	-0.0153	-0.437	-1.04	1.32	1.1	-0.382			1.81	1.59	-1.16	0.702	0.0391	2.38	1.06			0.85	0.0863	3.79	1.57	-2.43	3.58	2.08
-2.23	-0.604	-1.37	-1.23	0.224	1.09	-1.04			0.89	0.754	-1.4	-0.0237	-0.324	1.74	1.3			1.06	0.0704	2.74	0.41	-1.82	4.37	1.73
-1.89	-2.46	-0.402	-1.23	0.163	0.664	0.981			0.531	1.24	-0.025	0.0567	-0.91	2.38	1.23			1.27	-1.07	3.29	0.926	-0.255	3.16	2.28
-1.38	-1.53	-1.91	-0.683	-0.465	0.967	-0.878			0.372	-0.517	0.215	0.121	-0.709	1.66	0.693			1.15	-0.309	3.13	1.72	0.109	1.4	0.488
-1.05	-1.76	-1.35	-1.55	-0.62	1.12	-0.247			0.863	-0.168	-0.74	-0.471	-0.486	2.52	1.66			1.74	-1.45	4.57	1.13	-0.371	2.74	1.84
-0.523	0.662	-1.39	-0.331	0.0239	1.26	-2.12			1.22	-0.166	-0.417	-0.621	-0.138	2.66	0.113			-0.112	-0.704	4.32	0.544	-0.256	1.82	1.18
-0.19	-0.686	-0.206	0.244	0.826	1.03	0.202			0.725	0.608	0.191	-0.722	0.719	1.63	1.07			0.789	0.341	4.18	-0.0753	0.812	1.76	1.46
0.54	-0.625	-1.65	0.291	0.216	1.26	-2.24			0.55	-1.06	-0.233	-0.585	0.676	2.43	0.986			1.48	0.00965	3.25	-0.23	-0.302	1.96	2.77
0.381	-0.0338	-0.484	-1.23	-0.0349	0.298	-0.247			0.813	-1.15	-0.384	-1.45	1.93	2.37	0.873			1.07	3.31	3.02	-0.536	0.68	0.924	2.18
0.0171	0.933	-1.64	-0.946	-1.2	0.473	0.578			0.114	0.142	-0.0145	-1.29	2.03	1.26	1.36			1.04	2.97	3.93	-0.68	1.62	0.421	1.66
-0.339	0.144	0.317	-1.01	-0.115	0.238	0.362			0.278	-0.948	-0.811	-0.947	0.667	1.81	2.27			0.995	3.56	2.8	1.03	2.59	0.472	2.25
-0.559	0.15	0.0279	-1.9	-0.541	-0.217	-0.274			0.597	-1.22	-0.196	-0.586	0.272	1.4	0.61			2.2	3.03	2.56	1.35	1	1.44	2.04
-0.306	-0.256	0.953	-2.25	-1.61	0.303	-2.83			-0.826	-0.892	0.114	-0.906	0.718	2.01	1.98			1.95	2.61	0.416	2.89	0.425	-0.233	1.85
0.565	-1.53	-0.223	-2.38	-1.68	0.959	-1.13			-0.479	-1.26	0.322	-0.947	0.213	2.88	0.576			1.72	1.42	2.32	2.56	0.35	0.683	1.05
0.124	0.721	-1.04	-0.776	-2.1	1.29	-1.8			0.301	0.218	0.62	-1.34	-0.478	2.56	0.751			0.593	1.22	3.88	2.36	-0.0486	0.719	2.4
-0.415	0.348	0.34	-1.62	-1.15	1.07	-1.11			0.242	-1.37	1.21	-1.17	-0.977	2.06	-0.469			0.436	2.38	2.35	2.25	-0.499	1.39	2.75
-1.02	0.606	-1.51	-1.85	-1.57	0.929	-2.44			-0.816	-1.66	1.2	-1.91	-0.759	1.57	-1.25			0.372	1.9	3.77	1.31	0.158	1.18	2.14
-1.21	-0.492	0.453	-1.55	-1.1	0.49	-0.701			-0.685	-0.368	1.95	-1.28	-0.954	2.55	1.3			0.856	1.01	3.38	0.604	-0.415	-0.36	1.97
-1.44	-1.22	-0.237	-0.927	-0.752	0.735	-0.425			0.0461	-0.47	1.74	-1.44	0.0868	2.14	1.41			2.26	2.06	2.52	1.25	-1.01	1.3	1.4
-1.98	-0.893	0.126	-0.335	-0.193	0.83	-0.0494			0.289	-1.22	0.986	-1.15	-0.379	3.67	1.81			2.96	1.83	1.79	2.47	-0.77	0.675	1.46
-2	0.675	-0.605	-1.9	-0.359	-0.0149	1.07			0.22	-0.404	1.36	-1.08	-0.477	2.76	-0.636			2.78	1.98	1.28	3.6	-0.0797	3.15	1.31
-2.29	-0.0703	1.21	-1.36	0.244	0.336	0.0981			0.149	-0.73	0.875	-0.741	-0.984	1.58	0.302			2.83	2.15	0.662	4.62	0.154	6.42	2
-2.02	-0.972	1.05	0.334	0.128	-0.0797	-1.27			0.0535	-0.716	0.716	-0.683	-1.45	3.23	0.777			1.49	2.15	2.78	5.04	0.0933	7.63	1.91
-2.05	-0.986	-0.44	1.55	-0.0091	0.909	0.529			0.043	-1.19	1.83	-1.48	-1.58	2.61	-0.767			2.26	0.806	2.2	3.22	-0.094	6.35	1.29
-1.28	-0.317	-0.619	1.47	0.387	1.43	-0.749			-0.0695	-0.928	0.416	-1.58	-1.55	3.17	-0.256			1.7	-1.54	1.36	1.67	-0.286	5.02	2.45
-0.98	-0.689	-0.991	0.916	-0.00654	1.53	-0.0319			0.554	-1.75	0.296	-1.57	-1.75	2.26	0.381			2.88	1.62	1.9	2.24	-0.778	4.1	2.4
-0.601	-0.961	0.279	1.3	1.47	1.7	-1.5			0.751	-0.421	0.783	-0.934	-0.64	0.962	-0.0273			1.92	0.287	0.198	1.91	-0.725	2.92	1.99
-0.819	-1.49	-0.212	1.03	1.08	2.18	-2.03			0.439	-1.26	0.981	-1.23	-0.483	1.94	1.02			2.46	1.55	0.432	0.723	0.149	4.35	2.23
-0.556	-1.4	-0.209	0.471	0.112	2.25	-1.68			0.296	-0.513	1.56	-0.974	-0.307	3.29	-0.159			1.25	0.255	0.861	0.698	0.0334	7.36	2.18
-0.505	-3.73	0.933	-0.215	0.334	1.43	-1			0.457	-0.663	1.06	-1.49	-0.263	2.59	0.62			1.14	1.54	2.42	0.657	0.00925	6.55	2.79
-0.118	-2.42	-0.876	-0.33	0.492	1.41	1.4			0.995	-0.663	1.26	-0.463	-0.424	1.33	1.24			1.34	1.4	0.924	1.27	-0.249	3.93	2.16
-0.743	-2.15	-0.938	-1.28	0.265	1.1	-1.09			0.932	-0.188	2.2	-1.85	-0.256	1.8	0.375			1.47	1.52	0.315	0.735	-0.0393	2.83	2.12
-0.969	-2.5	-2.03	-0.51	-0.189	0.827	-1.03			0.385	-1.03	2.11	-1.4	-0.89	1.78	0.319			0.458	0.736	0.13	-0.0818	-0.302	2.33	2.43
-1.15	-0.00648	-0.0487	-1.7	0.582	1.12	0.0589			0.462	-0.103	0.977	-1.13	-0.625	1.79	0.21			-0.226	0.879	2.44	-0.0568	-0.223	4.01	3.25
-0.867	-0.0248	-0.0492	-1.07	0.332	1.67	1.82			0.788	-0.383	0.508	-1.7	-0.633	1.33	0.488			0.195	-0.223	1.34	0.849	-0.86	5.92	2.51
-0.569	-2.59	-1.53	-1.42	-0.0709	0.961	-1.89			0.571	-0.0746	0.627	-1.66	-0.903	1.03	-1.06			-0.821	0.574	1.61	0.953	-1.34	5.42	1.82
0.00474	-1.71	-0.866	0.235	-0.637	1.15	-2.01			1.83	0.0922	1.67	-1.13	-1.22	2.17	0.226			-0.729	-0.964	0.487	1.73	-1.98	5.47	1.52
0.117	-0.637	-2.95	0.274	-0.526	1.58	-1.26			1.53	1.13	0.344	-1.41	-1.6	1.39	0.0464			-0.0512	-1.2	0.829	0.26	-2.2	6.6	1.01
0.571	-0.339	-0.768	-0.613	-0.27	1.3	0.264			1.31	0.721	0.879	-1.49	-0.927	1.56	1.23			0.0928	-2.34	1.11	-0.48	-1.36	5.43	1.79
0.0853	-1.68	-2.16	-0.874	-0.391	0.865	-3.18			1.29	0.54	0.987	-1.43	-1.03	1.97	1.6			0.621	-1.7	4.02	0.504	-1.24	5.22	2.28
0.405	-0.325	-1.7	-2.05	0.197	0.932	-2.14			1.39	0.692	1.02	-2.09	-0.906	2.22	1.32			0.481	0.908	2.68	1.41	-1.02	4.66	1.92
-0.623	-1.74	-1.76	-1.12	0.774	0.979	-0.669			0.74	0.212	1.24	-1.63	-0.479	1.27	0.557			1.36	0.654	3.55	2.89	-0.531	5.77	1.71
-1.01	1.21	-0.102	-0.945	0.859	1.2	-0.27			0.876	0.268	1.75	-1.43	-0.768	2.69	1.42			0.796	1.95	3.74	1.82	-0.269	4.6	2.63
0.179	0.000691	-3.05	-1.82	1.67	1.06	0.622			0.92	0.777	1.07	-1.2	-0.566	1.73	-1.96			2.47	0.703	2.5	2.29	-1.4	4.61	1.71
-0.0392	-0.786	-2.75	-2.3	1.44	-0.404	0.278			0.648	-0.982	1.38	-1.31	-1.07	2.54	1.6			2.21	0.675	4.7	2.18	-1.02	2.61	1.77
0.0432	-0.24	-0.825	-1.34	1.47	0.532	1.07			0.535	1.28	1.72	-0.91	-0.619	1.71	0.818			1.71	0.956	4.91	1.47	-1.3	3.85	1.23
0.224	-1.01	-0.00522	-2.85	1.5	0.329	0.824			0.291	-0.0139	1.75	-1.08	-0.708	2.77	1.39			2.03	-0.655	3.1	2.35	-2.56	3.72	1.34
-0.169	0.0752	-0.95	-0.953	1.08	0.0207	-0.868			-0.109	-0.295	0.0467	-1.01	-0.0757	3.7	-0.743			1.94	-0.591	6.39	1.74	-1.9	3.18	2.17
0.209	-0.759	-1.2	3.17	1.31	-0.173	0.977			-0.105	-0.394	0.208	-1.16	0.277	2.19	-1.15			2.06	0.35	4.57	1.46	-1.73	2.72	0.112
0.309	-1.61	-0.516	2.94	1.49	-0.434	-1.97			0.391	-0.413	1.36	-1.7	0.548	1.36	-0.000373			1.43	-0.315	6.18	1.33	-2.89	2.25	2.31
0.363	-0.903	-2.29	1.99	0.757	-0.721	-0.924			0.281	-0.235	0.996	-1.16	0.397	0.564	0.591			1.29	-0.712	4.07	0.653	-1.75	0.95	0.979
0.271	-1.23	-1.51	0.00393	0.234	0.333	0.0719			0.0241	0.852	0.85	-0.239	0.0262	1.99	-0.27			1.68	-0.294	6.92	1.73	-0.995	1.89	1.34
0.179	-1.17	-1.98	-0.353	0.617	0.0168	-0.373			-0.135	0.743	0.132	-0.33	-0.454	2.33	0.581			0.637	-0.0935	5.22	0.991	-0.758	0.603	1.38
0.279	-2.68	-0.23	-1.3	0.136	0.0554	-0.484			0.54	0.162	1.09	-0.76	-0.155	2.56	0.29			-0.558	0.517	4.85	0.139	-1.37	1.55	1.91
0.0824	-2.34	-0.539	-0.0448	0.000892	-0.144	1.4			0.434	1.84	1.04	-0.444	-0.0605	2.75	1.65			0.206	1.81	3.62	-0.0881	-0.628	2.63	2.28
-0.609	-1.64	1.55	-1.5	0.245	0.167	-1.69			1.24	0.176	0.632	0.571	-0.283	1.71	0.371			-0.306	1.8	4.03	-1.03	-0.9	1.92	2.75
-0.122	-2.04	-2.63	-0.892	0.318	0.858	-0.363			1.04	1.3	-0.167	0.101	-0.106	1.98	0.349			-0.601	2.91	5.94	0.211	-1.2	1.09	1.81
-0.339	-2.55	-1.59	-0.516	1.28	0.174	-1.51			0.717	1.79	0.896	-0.445	-0.0902	2.15	1.05			0.117	0.315	4.67	0.276	-1.19	1.73	1.41
-1.02	-2.24	-0.0759	-0.0456	0.987	-0.384	-2.43			0.427	1.04	0.489	-0.281	-0.153	3.14	1.89			0.272	-0.838	3.75	-0.174	-0.666	0.48	0.623
-0.88	-1.65	0.295	-1.22	0.138	0.0519	-1.22			0.126	1.92	-0.989	-0.73	-0.389	1.81	1.6			-0.148	-0.263	5.69	-0.956	-0.372	1.05	2.56
-0.239	-2.62	0.246	-2.18	0.369	0.58	-0.93			0.147	0.802	-1.41	-0.834	-0.545	2.95	-0.606			0.593	3.65	3.13	-1.15	0.329	1.99	1.98
0.541	-0.545	-0.319	-2.31	0.0711	0.528	-1.03			-0.566	3.2	-1.03	-0.114	-0.112	3.84	0.476			-0.05	2.79	2.37	-1.04	0.557	1.19	2.62
0.449	-2.13	-0.104	-3.17	0.0139	1.17	-0.722			-0.478	1.21	0.16	0.127	-0.292	1.62	1.37			0.297	3.03	1.77	-0.779	-0.39	2.49	3.69
0.468	-0.257	-1.45	-4.04	0.413	0.664	-1.5			-0.867	1.57	0.68	0.168	0.626	3.15	2.43			0.129	2.02	1.17	-0.192	-0.129	2.95	2.43
1.35	-0.954	-1.39	-1.74	0.893	0.764	-0.484			-1.61	0.575	0.539	-0.745	0.669	2.74	1.06			0.865	1.23	3.95	0.332	0.396	4.35	2.03
2.1	-1.6	-0.647	-2.09	0.661	1.06	-1.22			0.182	2.05	0.432	-0.885	0.449	3.19	0.329			1.42	0.508	4.18	0.0826	0.454	1.54	1.79
1.69	-1.1	-0.484	-0.301	-0.231	0.861	-0.018			0.0914	1.05	-1.3	-1.23	-0.172	2.94	0.968			1.46	0.886	4.87	-0.214	0.382	2.26	2.57
1.51	0.592	-1.06	-0.0928	-0.995	0.499	-0.514			0.588	0.945	-1.37	-1.12	-0.0977	2.63	-1.29			2.47	0.172	6.02	0.0917	-0.373	1.14	1.16
0.553	-0.571	-1.04	-0.688	-0.247	0.0289	-1.04			0.444	1.56	-1.66	-1.93	-0.788	3.49	2.11			2.02	-0.158	4.7	0.242	-0.439	3.2	1.61
-0.424	-0.469	-0.393	-1.66	-0.992	0.323	-0.4			0.75	0.851	-1.73	-1.43	-0.899	3.51	1.05			1.83	0.401	3.91	1.42	-0.853	2.14	0.674
-0.535	0.339	-1.48	0.663	-1.44	0.109	0.637			0.427	0.864	-0.76	-1.5	-0.653	3.53	0.756			1.61	1.08	3.86	1.59	-0.281	2.33	1.37
-0.406	-0.439	-0.93	3.13	-0.423	0.051	0.152			0.136	0.81	1.42	0.693	-0.0588	3.5	1.9			0.682	1.52	4.19	1.48	-0.278	2.33	2.21
-0.143	-0.65	-1.23	2.42	-0.474	0.752	-3.11			0.0837	0.346	0.258	0.527	-0.26	4.15	-0.624			0.226	2.35	4.51	0.611	-0.0852	3.42	2.08
-0.49	-1.67	-1.33	1.92	-0.902	0.114	-1.14			-0.289	-0.237	0.0374	-0.0224	-0.0422	2.67	0.351			-0.0804	3.11	4.99	1.09	-0.245	0.813	2.18
0.486	0.742	-0.673	2.05	-0.812	-0.0422	-1.24			0.0281	0.553	-0.98	-0.0232	0.547	4	0.673			0.0886	1.88	4.68	-0.0383	0.0448	1.53	1.93
1.56	0.739	-1.8	0.0284	-0.697	-0.304	-1.08			0.155	0.793	-0.0958	-0.631	-0.339	2.44	0.738			0.461	3.1	3.98	1.05	0.519	2.64	1.25
1.86	0.908	-0.977	-0.523	-1.32	0.783	-1.41			0.888	1.07	0.583	-0.605	-0.297	3.38	2.71			-0.108	1.16	4	0.576	-0.324	2.36	1.34
1.06	0.657	-2.24	-0.446	-0.733	0.0148	-2.2			-0.137	-0.255	0.439	0.39	-0.461	2.95	0.593			-0.404	1.05	2.97	1.7	1.37	2.7	2.37
0.543	0.324	-1.4	0.565	-0.941	0.753	-0.973			-0.538	0.645	0.511	-0.246	-0.696	3.22	1.93			1.2	2.92	4.5	3.36	1.98	1.62	0.714
1	0.0171	-0.8	3.06	0.496	0.857	-0.114			-0.506	0.594	-0.836	0.054	-0.268	1.41	0.219			1.35	1.61	3.89	1.57	2.39	4.18	3.24
1.88	0.00201	-2.79	3.14	0.494	1.5	-2.59			-0.582	-0.504	0.163	1.01	0.211	3.16	1.27			1.26	4.1	3.52	1.6	2.65	1.91	1.12
2.69	-0.691	-1.47	1.25	0.87	0.314	-1.71			-0.0547	-0.702	-1.04	0.027	-0.17	2.7	2.4			1.16	4.06	4.6	0.959	2.19	3.88	1.87
3.06	1.48	-1.63	1.13	0.28	-0.269	-0.484			-1.38	1.69	-0.783	0.95	-0.41	1.23	2.38			0.354	2.15	4.02	1.41	1.96	2.05	2.55
2.38	2.01	-1.94	1.25	-0.385	-0.491	-0.285			-1.3	0.354	-0.741	0.546	-0.227	2.34	1.78			0.102	1.81	3.78	0.624	0.839	1.6	2.18
1.76	1.91	-1.67	-0.321	-0.13	0.0352	0.19			-0.651	0.725	0.0429	-0.284	0.196	2.05	-0.17			1.01	2.26	2.55	0.913	0.208	1.78	1.76
1.76	1.29	-0.193	1.13	-0.121	-0.0184	-0.49			-0.531	-0.854	-0.549	-0.11	0.836	3.33	1.54			0.753	2.48	3.46	1.47	1.53	2.05	1.76
1.64	2.13	-3.59	0.0125	-0.277	0.284	-0.71			-1.02	0.692	-1.12	-0.0872	0.951	2.17	1.6			0.468	1.6	4.87	0.378	1.47	2.53	1.3
0.825	2.43	-2.31	0.27	0.213	0.913	-1.11			-1.51	0.386	-1.15	0.278	0.897	0.595	1.69			1.72	1.55	5.47	-0.288	0.827	1.97	1.4
1.05	0.573	-2.04	-0.453	0.595	0.667	1.27			-1.72	0.854	-0.242	0.221	-0.0283	1.69	0.457			1.92	1.84	5.19	0.204	0.0212	2.56	2.51
1.09	1.37	-0.644	0.97	1.02	1.57	1.96			-1.14	1.16	-0.947	0.0189	-0.378	2.31	1.65			2.03	1.27	4.15	-0.00217	0.413	3.47	2.43
0.775	1.07	-0.878	-0.52	0.215	1.82	0.374			-1.15	-0.19	0.236	-0.246	-0.673	2.73	3.92			1.43	0.808	3.42	-0.0115	-0.745	4.31	1.88
0.359	0.99	-0.561	0.653	0.344	1.37	0.356			-1.84	-0.75	-0.225	-0.495	-0.144	3.76	1.33			1.7	-0.106	3.85	0.653	-0.749	2.37	1.93
0.29	-0.0589	0.829	0.639	0.133	1.38	0.766			-1.13	-0.833	-0.332	-0.667	-0.534	2.95	1.25			1.7	2.02	4.53	-0.658	0.347	2.55	1.29
0.189	-0.827	-0.133	-0.364	-0.245	0.543	-0.291			-1.02	0.653	-0.674	-0.159	-0.365	2.12	1.06			0.276	-0.211	4.08	-0.0362	-0.0966	2.1	2.51
0.256	-2.2	-2.19	0.215	-1.17	0.292	-0.628			-0.759	-0.0408	-0.302	-0.537	0.772	2.49	1.57			0.749	1.12	5.51	0.744	-0.15	1.99	1.63
0.215	-1.71	-1.81	-0.619	-1.38	-0.00333	0.137			-1.16	-0.00835	-0.813	-0.674	0.758	2.67	-0.0802			0.0949	-0.59	4.6	1.47	0.827	1.63	0.974
0.814	-2.74	-1.34	0.647	-1.75	-0.288	-0.819			-1.07	0.86	-0.601	-0.147	0.641	1.45	1.24			0.851	0.665	4.18	1.01	1.61	1.85	1.32
0.534	-2.98	0.147	-0.449	-1.19	0.0243	-0.783			0.0123	-0.65	-1.77	-0.742	0.243	2.16	2.08			1.03	1.42	4.5	0.709	1.52	2.35	2.08
0.283	-1.13	-0.511	-0.211	-0.821	1.08	-0.915			0.0377	1.6	-0.913	-1.05	-0.0399	2.15	1.35			0.58	1.14	3.57	-0.0151	1.02	1.49	0.888
0.149	-1.7	-0.183	-0.128	-0.168	1.43	-2.5			0.396	-0.303	-1.41	-0.0552	-0.246	3.26	1.46			-0.401	1.23	3.96	0.417	0.928	1.26	2.14
0.349	-1.01	-0.59	0.00541	0.128	0.379	0.637			0.569	0.316	-1.4	0.558	-0.344	2.49	-0.777			-0.351	1.46	3.29	0.821	1.2	1.06	1.92
0.714	-1.88	-0.366	-0.0461	0.982	0.0416	-0.464			0.404	0.875	-0.46	-1.29	-0.621	1.08	2.27			-1.45	3.08	3.63	0.94	2.56	3.6	1.75
0.796	-0.0564	-2.5	0.621	0.552	0.141	-0.767			-0.189	0.105	-0.256	-0.861	-1.15	1.63	0.272			-1.4	2.19	4.66	1.63	1.38	3.34	1.9
0.539	-0.803	-1.55	-0.501	-0.524	-0.234	-0.243			-0.144	1.45	-0.148	-1.27	-1.2	1.13	0.546			-1.21	-0.345	4.73	0.895	2.55	2.16	1.66
0.151	-1.1	-0.977	1.36	0.311	-0.583	-0.744			-0.188	1.37	-0.405	-1.18	-1.01	3.08	0.365			-1.11	2.44	4.81	1.01	1.6	2.21	2.03
-0.381	-0.636	-0.58	-0.797	0.245	0.12	1.12			-0.119	0.818	-1.66	-2.11	-0.948	1.87	0.549			-1.47	0.705	4.51	0.838	1.36	2.66	1.82
-0.608	-2.02	0.801	-0.199	0.0615	-0.981	-1.56			-0.44	1.18	-0.646	-0.977	-1.19	0.541	0.608			-1.18	-0.122	4.56	-0.0832	2.69	2.26	2.7
-0.806	-0.778	0.307	0.0656	0.391	-0.637	-0.331			-0.537	0.171	-0.175	-0.233	-0.275	1.38	1.64			-0.729	6.05	3.44	0.118	3.26	1.2	1.48
-0.252	-1.49	-0.683	-0.811	0.505	-0.778	-1.14			-0.779	-0.0947	0.321	0.202	-0.151	0.896	-0.37			-0.33	6.5	3.02	-0.0675	6.15	2.03	1.74
-0.444	-1.08	-1.41	-2.48	0.603	0.074	-2.22			0.00417	-0.107	1.03	0.827	-0.358	0.616	2.22			0.0241	-1.67	3.68	0.436	8.7	2.03	2.14
-0.25	-0.467	0.598	-2.18	0.275	-0.0459	-0.751			0.621	0.0422	0.553	-0.314	-0.41	0.632	0.728			0.619	1.68	3.43	-0.138	9.6	3.89	1.78
-0.00178	-0.797	-1.45	-1.16	0.219	-0.103	-0.0896			1.1	0.652	0.825	-0.197	-1.16	1.38	0.923			0.295	0.944	3.01	0.343	9.14	1.46	1.77
0.082	-0.0925	-2.13	-0.789	0.507	0.192	0.681			1.04	0.313	2.04	-1.06	-1.02	3.03	0.456			-1.3	-1.77	6.71	0.547	9.04	2.27	1.52
-0.0143	-0.718	0.666	-1.09	0.0802	-0.643	-0.154			0.776	0.244	0.737	-0.232	-1.89	2.92	2.01			0.0218	0.671	2.82	0.0602	7.5	1.9	0.519
0.241	-1.52	-2.93	-2.96	0.0902	-0.996	0.0443			0.854	0.399	0.745	-0.24	-1.27	3.64	0.358			-0.703	0.0276	2.75	1.41	6.11	3.59	1.02
0.0109	-1.48	-1.67	-3.41	-0.73	-0.761	-1.03			0.0404	-0.313	2.08	-0.846	-1.86	4.23	0.00623			-0.897	-0.0911	3.53	1.55	5.68	2.22	1.52
-0.134	-0.708	-1.84	-3.22	0.963	-0.291	0.00113			-0.321	0.492	1.18	-0.601	-1.91	3.68	1.22			-1.02	-0.248	3.99	1.33	5.52	2.05	3.05
0.304	-1.58	-0.326	-2.92	0.501	-0.0197	-0.973			-0.296	0.683	-0.0264	-0.457	-1.65	2.25	0.549			-1.53	-1.88	3.66	1.37	3.71	2.48	2.84
0.138	-0.483	-2.57	-3.71	0.888	-1.01	0.795			-0.248	0.586	0.513	0.195	-0.61	1.75	0.148			-0.891	-1.29	4.62	1.26	3.25	1.9	2.12
-0.376	0.775	0.481	-2.43	1.37	-0.795	0.295			-0.223	0.476	0.908	0.109	-0.764	3.41	0.877			-0.789	0.779	4.64	0.915	2.94	2.43	0.217
-0.579	-1.28	-1.63	-2.67	0.709	0.0356	0.338			-0.519	1.01	-0.0285	-0.878	-1.25	2.46	-0.673			-1.66	0.462	3.91	0.97	2.29	2.15	0.242
-1.05	-0.74	-1.35	-3.82	-0.252	-0.489	-1.31			-0.169	0.404	0.824	-0.924	-0.957	3.67	-0.526			-1.1	-1.22	3.13	0.626	0.773	1.95	0.696
-0.721	-1.47	-0.405	-3.03	-1.5	-0.234	-1.89			-0.604	1.37	1.24	-0.227	-1.74	2.53	2.35			-0.613	-0.45	4.03	0.333	1.59	0.384	1.54
-0.362	-1.2	-2.14	-2.5	-2.11	0.117	-1.49			-1.04	0.511	1.24	-0.808	-0.952	3.2	0.554			-0.27	1.52	5.6	0.159	3.63	0.0194	1.76
-0.0433	-0.505	-1.57	-1.96	-1.83	1.06	0.612			-1.28	1.05	-0.96	-0.257	-1.31	2.77	0.758			0.144	-1.86	5.11	-0.126	3.79	1.27	1.4
-0.246	0.153	-1.72	-0.493	-2	0.61	-2.12			-1.74	-0.491	1.12	0.239	-1.19	2.19	1.64			-0.0126	-0.701	5.76	1.23	3.53	1.38	1.89
-0.364	-0.878	-0.501	-0.815	-1.84	0.369	0.0215			-1.46	-0.886	0.13	-0.224	-0.952	3.03	0.831			-0.36	-0.424	5.24	-0.449	3.14	1.8	1.31
-0.458	-0.83	-1.35	-3.52	-2.18	-0.275	0.49			-1.05	-0.438	1.12	0.199	-1.28	2.41	0.679			-0.371	-0.719	4.18	-0.35	2.51	2.65	1.27
-0.347	-0.504	0.487	-3.52	-2.57	-0.306	-0.88			-1.45	-0.713	1.17	0.206	-1.45	2.98	1.8			-0.74	-0.62	5.09	1.08	3.22	1.44	0.731
-0.543	-1.61	0.629	-2.57	-2.04	-0.0111	-1.09			-1.76	-0.324	0.398	-0.0652	-1.17	2.2	0.203			-0.535	-1.14	3.48	0.163	2.98	1.38	0.731
-0.734	-0.839	-0.964	-3.23	-2.34	-0.375	-0.251			-1.57	-0.213	0.839	-0.955	-1.39	1.75	1.6			-0.924	0.855	3.4	0.655	2.86	0.209	1.02
-0.616	-0.789	-2.56	-2.73	-2.02	0.129	-0.798			-1.73	-0.568	0.294	-0.778	-1.24	2.87	-0.871			0.228	1.1	3.52	0.885	1.64	2.88	2.22
-0.871	-0.867	-3.38	-1.97	-0.891	0.589	-2.83			-1.78	-0.331	0.582	-0.827	-1.17	2.79	2.37			-0.319	-0.647	2.42	1.78	1.16	0.614	0.793
-0.809	-1.63	-1.01	-0.825	-0.0768	0.394	-1.68			-1.55	-0.0309	1.19	-1.09	-1.36	1.9	1.42			-0.302	-0.723	3.64	0.809	0.587	1.72	1.49
-0.516	-1.46	-2.11	-0.908	-0.455	0.852	-1.59			-1.46	-0.651	-0.099	-1.34	-1.09	3.76	0.941			-1.25	0.664	3.09	0.241	0.856	1.06	1.06
-0.0553	-0.51	-0.951	0.345	-0.629	0.284	-1.89			-1.99	-1.19	0.463	-1.87	-0.77	4.41	1.49			-1.82	0.0378	2.6	2.08	0.764	2.91	0.654
0.128	-1.91	-1.45	0.292	-0.952	-0.23	-0.3			-1.69	-0.134	1.13	-1.79	-0.0785	2.45	1.02			-2	0.681	2.56	1.85	1.47	2.1	1.54
0.259	-1.78	-2.06	0.18	-0.155	-0.15	-1.23			-1.13	-0.685	1.03	-0.954	0.306	2.54	0.86			-2.19	0.438	2.32	1.6	1.47	1.98	1.64
0.296	-1.44	-3.34	-2.02	0.339	0.092	-0.346			-1.16	-0.329	0.615	-0.595	0.516	1.22	3.08			-2.37	-0.24	4.46	1.63	2.56	2.04	1.13
0.582	-1.3	-4.04	-2.84	-0.503	-0.62	-1.58			-1.09	0.237	0.68	-1.05	0.137	2.12	1.45			-2.3	-0.633	2.45	1.79	1.26	1.57	1.38
0.441	-1.77	-1.9	-2.83	-1.48	0.00635	-1.6			-1.56	-0.559	0.796	-1.88	0.721	2.04	0.472			-2.37	-0.159	2.33	1.77	2.39	2.72	0.916
1.13	-2.14	-1.13	-0.473	-2.45	-0.323	-0.564			-1.98	0.692	0.807	-1.06	0.941	2.8	1.32			-3.52	-0.437	2.9	2.04	1.58	1.1	-0.169
1.47	-1.75	-2.45	-1.73	-2.99	-0.263	-1.42			-2.27	-0.557	1.82	-1.3	0.424	2.64	0.204			-3.23	0.0136	4.21	1.17	2.58	2.43	0.421
1.51	-1.61	-2.28	3.12	-3.23	1.75	-0.971			-3.14	-0.0395	0.497	-1.31	0.00807	1.81	0.12			-2.81	1.43	3.8	2.27	2.65	2.66	1.65
0.815	-1.5	-1.49	2.35	-3.53	1.77	0.122			-3.03	0.219	0.428	-0.794	0.109	1.59	1.07			-2.35	1.09	3.27	2.36	2.48	2.94	-0.0937
0.582	-1.96	-0.81	1.09	-3.63	2.45	-0.268			-3.09	-1.75	-0.277	-1.57	-0.0628	3.45	0.245			-2.19	-0.348	2.91	1.95	3.66	0.974	1.22
0.752	-2.88	-3.04	-0.358	-3.35	1.89	0.567			-3.05	-0.822	0.929	-1.28	-0.406	1.82	0.622			-2.25	0.105	1.33	0.927	4.49	2.66	1.4
1.51	-3.5	-3.83	-0.988	-3.57	1.98	0.107			-2.43	-1.25	-0.28	-0.113	-0.484	1.04	1.22			-2.17	-0.202	2.52	0.958	4.04	3.96	0.499
1.27	-2.36	-0.534	-0.546	-2.13	2.37	-0.664			-1.63	-0.272	-1.99	-0.891	-0.413	2.35	-0.441			-2.71	0.273	1.87	1.04	4.1	1.32	0.939
0.818	-1.28	-1.51	-1.21	-1.18	1.78	-1.48			-1.46	-1.21	-0.805	-0.772	-0.549	1.39	0.72			-2.39	-2.36	1.45	1.47	3.83	2.07	2.32
1.04	-1.74	-1.56	-1.08	-1.25	2.94	-0.576			-1.3	0.08	-1.29	-0.642	-0.099	2.2	1.98			-2.53	0.403	3.96	1.94	4.68	2.22	0.737
1.17	-1.33	-0.823	-1.39	-1.4	2.58	-1.06			-1.52	-0.66	0.169	-1.31	-0.509	2.09	-0.15			-3.04	-0.866	2.04	1	4.55	1.34	1.01
0.896	-1.76	-0.809	-1.13	-0.828	1.82	-0.585			-1.64	-0.691	-0.388	-1.04	-0.374	2.86	3.3			-2.62	-0.104	1.28	1.63	3.38	1.32	1.1
0.91	-1.53	-1.28	0.411	-1.15	1.9	-0.142			-2.04	-0.982	0.845	-0.177	-0.297	2.59	1.59			-2.12	1.07	3.82	1.97	3.86	1.78	1.55
1.56	-0.0264	-2.5	3.07	-0.728	0.628	-0.382			-2.28	-0.605	-0.175	-1.16	-0.455	1.94	2.1			-3.21	-0.504	4.24	0.945	4	1.29	0.639
1.41	-0.955	-2.84	2.46	-0.224	0.0813	-0.676			-1.83	0.762	0.578	-2.1	-0.713	1.25	0.468			-2	0.274	2.43	0.382	4.35	2.67	0.851
1.05	-1.56	-2.37	1.74	-0.466	0.983	2.42			-2.16	0.643	0.636	-1.64	-0.553	2.57	0.0819			-1.16	-0.816	0.0636	0.582	4.87	0.231	1.06
0.831	-1.36	0.782	2.91	-0.0675	1.01	1.02			-2.2	0.0535	-0.785	-1.23	-0.925	2.86	1.61			-0.663	-0.652	2.58	-0.0893	5.7	2.29	0.741
0.878	-1.57	-0.396	2.08	0.0449	0.991	0.279			-2.21	0.957	-0.386	-2.1	-0.463	1.7	-0.0813			0.633	-1.83	1.86	-0.142	5.38	0.196	0.332
0.611	-1.7	-1.23	1.32	-0.448	1.25	-0.623			-2.89	0.389	-0.0849	-2.07	-1.08	2.63	0.733			-0.193	-3.06	2.38	-0.442	4.85	0.101	0.043
-0.0917	-2.42	-2.38	-0.719	-0.515	1.12	-0.883			-2.86	0.893	-0.402	-3.14	-1.07	2.25	0.662			-0.502	-1.54	3.72	0.048	5.41	1.19	2.19
0.537	-1.21	-4.31	0.17	-0.698	1.89	1.93			-2.61	0.0313	-1.28	-3.02	-0.891	0.974	2.32			-0.802	-1.31	2.75	0.996	5.08	2.4	0.468
0.237	-1.46	-3.74	-1.36	0.267	1.8	0.375			-2.96	0.0934	-1.13	-2.56	-1.55	2.36	2.47			-0.737	-1.21	2.68	1.44	5.65	2.88	0.673
-0.135	-1.88	-2.88	-1.79	-0.381	1.75	0.753			-3	-0.0131	-1.23	-1.51	-1.36	0.253	0.95			-0.661	-2.52	2.28	0.348	4.37	-0.735	0.269
0.603	-0.732	-1.16	-1.22	-0.55	2.05	0.0639			-2.39	1.55	-0.807	-1.07	-1.51	1.73	0.91			0.182	-1.15	3.58	0.479	4.69	0.677	0.567
0.999	-2.8	-1.49	-2.03	-0.8	1.82	0.542			-2.56	1.27	0.15	-1.03	-1.7	1.74	1.81			-0.185	-2.2	3.14	0.163	4.05	0.228	1.59
0.896	0.125	-0.825	-1.91	-0.647	0.859	-1.65			-3.24	1.62	1	-0.659	-1.28	2.65	2.07			-0.756	-0.283	3.4	0.452	3.66	2.57	1.64
0.96	1.1	-1.32	-1.34	0.328	0.232	1.04			-3.17	0.846	0.0233	-0.122	-1.55	2.3	2.19			-0.442	0.114	1.84	1.1	3.54	0.942	0.608
1.07	-0.0429	-1.19	-1.98	0.829	-0.0178	0.337			-2.76	0.343	0.942	-0.672	-1.85	1.9	0.382			-2.05	1.1	3.98	1.92	3.41	2.63	1.4
1.43	0.464	-2.8	-2.93	0.633	0.414	-0.065			-2.34	-0.28	-0.302	-0.895	-1.8	2.54	-1.06			-1.82	-0.343	2.72	0.584	3.72	-0.304	1.5
2.19	-0.944	-2.88	-1.7	0.673	0.881	0.89			-1.58	0.569	0.487	-1.81	-1.88	3.67	1.41			-2.3	0.593	2.69	0.865	4.16	2.99	0.736
1.86	0.181	-2.77	-1.28	0.169	1.07	0.908			-1.11	0.97	-1.85	-1.31	-1.83	2.69	1.41			-1.09	-2.99	0.46	0.586	4.18	1.3	0.216
1.71	-1.47	-0.93	-1.56	-0.0517	1.46	0.741			-1.12	-0.161	-1.6	-1.27	-1.57	2.37	1.88			-1.58	-1.41	2.04	-0.267	3.7	-1.35	0.703
1.76	-2.08	-0.618	-2.8	-0.205	1.04	-0.72			-1.73	-0.17	-0.657	-1.41	-0.874	3.69	0.62			-1.74	-2.05	2.13	-0.0179	2.88	-0.0475	0.581
0.962	0.239	-1.62	-1.93	-1.28	0.839	1.53			-1.77	0.329	-0.227	-1.26	-0.517	1.39	0.931			-1.72	-0.674	3.93	-0.187	2.35	0.829	-0.457
0.682	-1.39	-0.754	1.94	-2.15	1.11	-1.28			-1.7	0.357	1.24	-1.41	-0.367	3.26	1.24			-1.11	1.22	3.34	-1.34	2.61	0.787	0.0946
0.0972	-0.905	0.00237	2.08	-2.65	0.708	-3.1			-1.2	-0.124	0.6	-1.22	-0.394	3.18	1.71			-1.52	-0.88	2.98	-0.072	2.67	0.806	0.514
0.0469	-0.156	-1.39	2	-2.5	0.696	-2.05			-1.3	-0.644	0.432	-1.32	-0.713	2.85	-0.724			-1.13	-1.92	1.94	0.755	1.63	2.62	-0.54
-0.517	0.0438	-1.5	-0.126	-2.25	1.24	0.283			-1.68	-0.228	-0.404	-1.11	-0.788	2.33	0.96			-0.761	-1.22	1.22	0.919	2.1	1.5	0.454
-0.967	-3.44	-2.34	-0.128	-2.49	0.824	0.415			-2.24	-0.182	-0.423	-1.27	-0.642	2.35	2.1			-0.121	-1.16	2.85	0.0804	1.73	2.28	0.346
-1.32	-1.92	-0.697	-1.56	-2.01	-0.272	1.43			-2.71	-0.591	-0.0683	-1.45	-0.665	2.38	1.91			-0.67	-3.58	0.422	-0.274	1.59	1.77	0.124
-0.935	-1.71	-0.541	-0.545	-2.19	0.717	1.97			-2.48	-1.05	0.0183	-1.57	-0.809	2.52	1.1			-0.58	-1.82	1.85	0.3	1.58	1.87	0.944
0.453	-0.504	-1.44	-0.0133	-2.34	0.694	0.435			-1.93	-1.17	0.844	-0.0236	-0.651	1.56	-0.158			-0.502	-0.747	2.02	0.0389	1.22	3.12	-0.0115
-0.402	0.115	-1.88	-2.07	-2.38	0.104	1.72			-2.11	-0.00207	-0.0299	-0.162	-0.455	2.12	-0.0848			-2.02	0.886	1.29	0.431	1.64	3.38	0.539
-0.516	-1.18	-1.97	-2.89	-1.82	-0.235	1.93			-1.12	-1.03	0.925	-0.427	-0.915	2.74	0.992			-2.55	1.77	3.92	0.6	1.2	2.04	0.787
0.207	-2.4	-1.55	-1.69	-1.93	0.193	0.354			-0.797	-0.424	0.0921	-1.08	-1.49	2.34	0.179			-2.77	1.71	3.57	0.488	1.21	2.26	0.874
0.439	-2.16	-2.14	-2.12	-2.73	1.34	1.31			-2.02	-1.55	-0.475	0.23	-1.42	2.05	1.35			-2.95	0.442	3.7	1.32	1.63	2.74	-0.616
-0.303	-2.8	-2.51	-1.5	-1.95	0.657	-0.417			-1.68	-0.48	0.0787	0.158	-1	2.57	1.39			-2.75	1.93	1.01	0.334	2.05	1.9	-1.39
-0.53	-3.33	-0.439	-0.419	-1.64	0.873	0.138			0.262	-0.741	-0.894	-0.738	-1.41	2.51	0.44			-1.96	0.653	2.06	1.2	2.22	3.8	0.512
0.327	-1.22	-0.962	-1.04	-1.5	0.199	1.36			1.1	0.102	-0.728	-0.946	-1.84	2.32	0.463			-2.74	0.777	2.3	0.921	1.81	2.91	1.42
0.0872	0.000251	-1.23	-0.87	-0.831	1.23	0.687			2.73	-0.49	-1.03	-1.36	-1.48	2.07	0.0352			-3.23	-4.24	2.98	1.12	2.09	2.26	1.76
-0.547	-2.23	-2.49	-1.38	-1.34	-0.378	1.03			4.12	0.134	-0.587	-0.873	-1.49	0.648	0.491			-2.26	-1.86	3.07	1.77	1.17	2.36	1.78
-0.157	-1.58	-1.53	-2.13	-0.532	-0.246	0.605			3.04	0.0668	-0.237	-1.27	-1.19	2.87	0.0513			-0.953	-1.84	2.01	1.22	-0.037	2.55	0.842
0.578	-1.45	-2.64	-2.31	-0.538	-0.239	0.368			2.57	-0.213	-1.35	-1.2	-1.08	3.9	0.605			1.15	-1.01	1.04	0.162	0.00816	1.83	2.69
0.623	-2.05	-2.43	-3.84	-0.938	0.644	-0.0861			1.81	-0.0626	-0.738	-1.35	-1.62	2.2	2.21			1.99	0.526	2.13	0.35	-0.307	0.387	2.2
-0.128	-0.768	-3.06	-2.84	-1.89	0.226	-2.35			1.78	-0.567	-0.75	-0.989	-1.81	2.96	-0.225			2.34	0.411	0.806	0.176	-0.737	3.39	2.09
-0.38	-1.56	-1.62	-3.37	-1.65	0.0797	1.54			1.11	-1.77	0.613	-2.11	-1.45	2.61	0.265			0.939	0.636	2.55	0.407	0.232	1.3	-0.454
0.0917	-1.23	-1.29	-1.88	-2.1	-0.621	3.64			1.01	-0.91	-0.0363	-0.515	-2.28	2.56	0.522			0.301	-0.341	1.94	0.472	1.72	1.9	1.58
0.217	-1.1	-1.93	-1.41	-2.6	0.0444	0.459			0.446	-1.29	-1.4	-0.943	-2.21	4.13	0.403			0.357	-1.2	2.57	1.11	1.09	3	2.02
0.0781	-0.474	-1.91	-0.169	-1.83	1.28	-0.571			0.131	-0.369	-0.698	-1.67	-1.92	2.64	0.385			1.48	0.0528	1.18	0.0928	0.982	3.35	1.02
0.341	-1.3	-0.562	-0.901	-1.4	0.39	-0.917			-0.658	0.405	-1.42	-0.741	-1.98	1.85	1.78			1.82	0.0951	2.77	0.423	0.843	1.81	2.33
0.477	-0.0394	-3.78	-1.3	-1.53	0.877	0.592			-0.982	-0.935	-1.64	-0.297	-2.71	2.87	0.0646			0.697	2.28	1.26	-0.422	0.616	1.22	2.57
-0.182	-1.19	-3.92	-2.04	-3.1	0.202	0.225			-1.42	-1.66	-2.03	-1.03	-2.74	1.97	0.0866			-0.59	2.64	2.34	-0.967	0.116	1.35	2.51
-0.775	-1.77	-1.28	-0.651	-2.51	0.438	-0.981			-2.17	-1.51	-1.3	-1.31	-2.7	2.02	1.13			-1.3	1.61	4.3	-0.311	-0.817	0.0289	2.78
-0.518	-0.778	-1.7	-0.737	-1.05	0.131	-0.52			-1.92	-1.2	0.0177	-1.34	-2.72	2.82	0.712			-0.979	0.00354	3.39	-0.546	-0.463	0.0209	2.87
-0.516	-1.63	-1.68	-0.398	-1.03	0.176	0.167			-1.04	-0.131	-0.36	-1.42	-2.42	3.43	-0.327			-1.03	-0.311	0.353	0.648	0.239	-0.487	2.79
-0.707	-0.562	-2.99	0.358	-0.654	-0.0368	-1.54			-0.785	-0.194	-0.321	-1.49	-2.38	3.02	-0.179			-0.486	-0.0286	1.24	0.132	-0.484	0.339	2.36
-0.243	-1.55	-2.33	-1.77	0.801	0.924	1.39			-0.34	-1.22	-0.74	-1.26	-2.68	2.81	0.213			-0.269	1.36	2.25	0.689	-0.237	1.63	1.6
-0.0702	-1.49	-2.71	-3.2	1.17	0.231	0.191			-1.08	-0.594	-0.563	-1.79	-2.25	3.25	0.882			0.107	1.83	4.97	1.78	-0.422	2.55	2.15
0.9	-1.76	-3.36	-3	1.39	0.367	-1			-2.13	-1.12	-0.778	-1.14	-2.2	3.3	-0.701			0.129	0.251	2.87	2.76	0.911	0.845	2.39
0.643	-1.72	-3.25	-2.85	1.37	0.132	1.3			-1.7	-0.428	-0.797	-1.36	-2.67	3.29	0.909			-0.313	0.26	2.55	2.34	1.64	0.154	1.94
0.546	-1.95	-2.03	-2.66	1.14	-0.189	-1.79			-1.28	-1.44	-0.784	-1.74	-2.54	1.38	1.52			-0.745	-0.0232	2.96	1.42	2.2	0.319	0.774
0.256	-0.298	-2.28	-2.55	1.15	0.0373	0.231			-1.66	-0.69	-0.437	-0.599	-1.14	2.93	0.415			-1.19	1.08	2.91	1.88	1.96	0.153	0.756
0.327	-1.45	-1.24	-3.42	-0.426	-1.22	-1.01			-1.99	0.779	-0.24	-0.434	-1.49	2.93	0.187			-1.42	0.92	1.76	1.4	1.87	0.69	1.38
0.502	-1.73	-0.927	-1.46	-0.418	-0.0917	0.0882			-1.89	0.00567	-0.028	-1.17	-1.38	3.22	0.633			-1.4	-0.121	1.29	0.741	0.864	1.37	0.286
0.526	-1.14	-1.57	-2	0.00854	-0.335	0.358			-2	-0.898	-1.13	-1.52	-0.52	2.66	-1.5			-2.12	1.09	0.834	0.574	-0.377	0.942	0.595
0.566	-0.468	-3.62	-0.815	-0.534	-0.166	-0.774			-2.04	-1.07	-0.769	-1.49	-1.49	2.26	-0.866			-0.508	0.128	1.9	0.404	-0.787	0.806	0.45
-0.135	-1.79	-3.77	0.443	0.563	0.439	0.296			-2.23	-0.373	-1.43	-1.14	-1.29	1.51	-0.227			-2.01	0.744	1.21	0.273	0.0576	1.26	1.72
-0.177	-1.23	-2.71	-0.759	-0.466	-0.271	-0.792			-2.26	-0.605	-1.33	-0.73	-1.01	1.99	-0.613			-2.24	0.263	-0.499	-0.367	1	1.4	1.96
-0.0426	-1.34	-3.46	-1.83	-0.879	-0.559	-2.31			-1.75	0.0948	-0.785	-0.754	-0.955	0.646	-1.42			-3.18	0.399	2.92	0.203	2	1.76	0.597
0.286	-1.55	-1.99	-1.89	-0.873	-0.163	-0.156			-1.54	1.36	-1.07	-0.771	-1.38	2.1	1.15			-2.31	0.423	1.22	1.32	1.33	0.562	-0.269
-0.125	-2.07	-1.31	-1.72	0.058	-0.356	-1.18			-1.68	1.13	-1.58	-0.759	-1.5	0.543	0.686			-1.42	0.986	1.13	2.04	2.38	2.41	-0.913
0.108	-1.23	-1.08	-1.57	0.00196	-0.62	-0.563			-1.98	-0.612	-0.865	-0.916	-1.24	1.76	-1.3			-1.18	0.383	1.71	1.51	2.27	2.49	1.19
0.61	-0.457	-1.35	0.0645	0.0209	0.368	1.51			-1.9	0.186	-1.62	-0.584	-1.05	1.04	-0.525			-0.609	1.36	5.25	0.455	1.36	1.41	0.456
1.31	-2.77	-2.27	-2.13	-0.212	-0.575	1.07			-2.56	0.12	-0.0135	-0.403	-1.21	2.57	-0.728			-0.105	1.09	3.8	0.596	0.973	2.46	1.52
1.79	-3.56	-2.14	-1.93	-0.206	-0.432	-0.777			-3.36	0.0495	-0.715	-0.763	-1.22	1.76	1.2			-1.09	-0.988	2.32	0.722	1.48	0.605	0.477
2.38	-3.47	-1.13	-2.36	0.594	-0.472	-1.45			-3.42	-0.153	-1.7	0.0522	-1.61	3.6	0.161			-1.89	0.695	1.83	1.97	1.52	1.48	-0.6
2.48	-2.59	-1.07	-1.23	1.86	-0.0123	-1.37			-3.04	-0.895	-2.08	-0.369	-2.08	3.32	0.319			-2.11	-0.297	2.4	4.09	2.05	1.15	-0.408
2.4	-3.38	-2.19	-1.63	0.841	-0.889	-1.06			-3.39	0.171	-1.93	-1.08	-2.21	2.55	0.353			-3.04	0.328	1.36	4.63	1.95	0.342	-0.277
2.22	-3.69	-1.06	-1.05	0.469	-0.531	0.486			-3.86	0.272	-1.86	-0.387	-1.96	3.53	-0.134			-3.15	3.12	1.09	2.81	0.978	-0.673	0.564
1.95	-2.8	-4.36	0.332	0.48	0.0998	1.96			-1.94	-0.583	-0.949	-1.52	-1.94	3.88	0.553			-1.67	0.418	1.97	2.85	0.429	1.11	-0.059
1.36	-3.03	-3.54	-1.43	0.196	-0.26	-0.663			0.98	0.803	-1.38	-2.24	-2.23	3.22	0.602			-2.02	1.71	3.22	1.2	0.223	1.31	-0.0271
1.02	-2.57	-1.86	-1.88	-0.182	-0.601	-0.759			0.638	-0.191	-1.75	-1.13	-2.47	3.74	0.0814			-1.84	2.11	2.56	2	-0.383	1.37	0.493
0.545	-1.49	-0.302	-1.69	-0.423	-0.359	-0.797			0.13	-0.42	-2.49	-1.19	-2.93	2.94	0.878			-1.12	1.57	2.89	2.46	-0.588	1.48	-0.174
0.659	-2.91	-1.4	-1.09	-0.183	-0.702	0.715			-0.5	-0.123	-0.973	-1.05	-3.22	4.44	-0.218			-0.654	1.02	1.16	1.6	-1.13	1.01	0.445
0.36	-2.15	-1.66	0.15	-0.115	-0.889	0.209			-0.408	0.153	-0.965	-1.1	-2.87	4.05	-1.17			-1.54	-0.484	1.2	2.31	-1.88	1.6	1.74
0.538	-0.696	-1.14	5.15	-0.779	-0.866	-0.56			-0.196	-0.454	-1.67	-0.903	-2.99	2.89	-0.31			-1.91	-0.401	3.3	2.07	-1.87	1.23	0.82
1.17	0.554	-1.6	2.61	-0.522	-0.21	-0.0143			-0.433	0.231	-2.16	0.0816	-2.84	2.62	-0.227			-2.13	0.886	2.51	1.33	-1.38	2.01	1.54
1.75	-1.66	0.615	1.09	-0.187	-0.711	-0.0181			-0.0121	-0.719	-1.33	-0.378	-3.11	2.41	0.3			-1.5	-1.37	2.67	0.511	-1.23	1.24	-0.437
1.73	-0.519	-0.623	-0.399	0.178	-1.52	-0.548			-0.114	-0.927	-1.5	-0.0809	-3.34	3.05	0.707			-1.53	0.267	2.6	0.363	-0.825	2.54	0.128
1.86	-0.594	-0.644	-0.716	-0.515	-1.98	0.91			-0.495	0.415	-1.26	-0.661	-3.25	3.2	2.4			-1.97	-0.652	2.35	0.393	-0.885	1.82	0.843
2.29	0.491	-0.517	-0.161	-0.345	-1.46	0.724			-1	-0.211	-1.47	-1.12	-3.14	3.17	1.98			-1.87	-0.0806	2.93	0.921	-0.934	1.8	0.406
2.22	-0.0439	-1.56	-1.44	0.121	-0.941	-0.898			-1.72	0.351	-1.34	-0.648	-3.19	1.72	0.929			-1.73	-0.338	1.01	1.16	-0.116	1.88	0.245
1.53	0.289	-0.868	-0.952	0.127	-1.44	-0.542			-1.6	-0.0413	-1.15	-0.894	-2.92	0.951	0.547			-1.22	-0.553	1.15	-0.435	-0.25	1.12	0.085
1.49	0.0493	-2.32	-1.24	-0.325	-1.16	0.929			-0.0956	-0.989	-1.49	-1.18	-3.04	2.43	1.49			-1.5	0.317	0.47	0.872	0.372	1.51	0.53
0.855	-0.996	-0.109	-1.75	-0.0839	-1.6	1.33			0.443	-0.0334	-0.697	-0.591	-2.99	2.08	3.05			-2.55	0.915	1.58	1.25	0.102	-0.888	-0.841
1.25	-1.17	-0.321	-1.26	0.304	-0.876	-0.0811			-0.461	0.534	-2.2	-1.42	-2.8	0.766	1.23			-1.07	0.418	1.7	0.306	0.473	1.21	0.552
1.53	-2.7	-0.606	-0.25	0.744	-0.446	0.183			0.58	0.517	-0.299	-0.842	-2.3	1.48	1.13			-0.29	-0.276	3.92	-0.216	1.02	0.371	0.253
2	-2.05	-1.9	-0.27	0.562	-0.817	-0.873			3.06	1.26	-0.542	-0.161	-1.03	1.7	0.892			0.148	1.04	0.807	-0.695	0.0442	1.09	0.171
2.69	-3.33	-1.73	-1.1	-0.502	-1.05	-1.7			2.65	-0.204	-0.293	-0.203	-0.237	1.57	-0.269			-0.226	0.881	3.12	-1.02	-0.223	1.99	-0.486
2.71	-1.53	-2.57	-1.15	-0.305	-0.839	-0.0859			2.57	-0.182	-1.73	-0.564	-0.593	1.13	0.382			-0.451	-0.103	4	0.633	-1.19	-0.239	1.35
2.54	-0.511	-1.14	-1.69	0.994	-1.13	-0.071			1.86	-1.05	-1.17	-0.0398	-1.35	1.1	0.684			0.0771	1.55	1.44	1.17	-1.37	0.124	0.218
2.36	-1.32	-1.84	-1.43	0.919	-0.638	-0.269			0.486	0.68	-1.48	-0.479	-1.47	1.41	1.33			0.862	1.89	1.48	1.01	-0.511	2.18	0.866
3.09	-0.843	-2.17	-1.23	-0.162	-0.746	-1.13			0.66	1.18	-1.46	-0.515	-1.13	1.67	0.536			1.54	-0.669	1.53	0.289	-0.882	0.979	0.842
3.22	-1.53	0.889	-0.926	-0.848	-0.706	-2.18			0.903	-0.449	-0.214	-0.614	-0.79	0.676	-0.215			1.47	-0.619	-0.113	0.782	-1.12	1.75	1.58
2.69	-1.19	0.438	0.283	-1.43	-1.94	-0.00779			0.427	-0.0504	-0.938	0.145	-0.481	1.57	1.36			-0.35	-0.0422	0.867	0.0887	-1.71	1.47	1.36
1.93	-0.92	-1.79	-0.511	-0.581	-1.49	-0.545			0.629	0.538	-0.753	1.03	-0.444	0.474	-0.726			-1.26	1.08	0.891	0.634	-1.31	0.695	2.08
1.26	0.9	0.0108	-0.351	-0.35	-0.89	-0.367			0.583	0.577	0.575	-0.396	-0.669	0.866	-0.792			-0.825	0.586	0.419	-0.296	-0.867	-0.0488	1.25
1.32	-2.12	-0.491	-1.61	1.22	-1.25	0.563			0.889	1.17	-0.95	-0.343	-0.62	1.49	0.205			-1.06	-0.452	2.44	0.554	-1.26	0.217	1.27
0.776	-2.19	0.865	-1.2	1.21	-0.722	-0.706			1.77	0.282	-1.3	0.658	-1.03	0.75	1.15			-1.91	0.265	3.65	1.27	-0.557	0.61	1.09
0.423	-1.45	-0.113	-1.44	0.749	-0.539	-0.253			1.4	0.21	-0.376	-0.49	-1.2	1.37	0.451			-1.88	-0.518	2.93	0.874	0.658	0.847	2.2
