# Supplementary material for: Metabolic sensing in AgRP neurons integrates homeostatic state with dopamine signalling in the striatum
Source: eLife journal article supplement (doi:10.7554/elife.72668), 2022-01-12
Supplement: fig5-data1 [file Fig5D.xlsx]

## Sheet: Sheet1
NFO						CHOW						PB
0.0772	-0.73	0.309	0.537	-0.0477	0.247	0.542	1.78	-0.522	2.13	-0.873	0.0935	-0.776	0.823	-0.879	-0.575	-0.284	-1
-1.62	1.06	0.42	0.0503	-0.691	0.0845	0.484	1.83	-2.82	0.654	-1.23	0.134	-0.404	-1.35	-1.44	-0.344	-0.245	-0.35
0.256	-0.0654	0.798	0.179	-1.15	-0.402	0.231	1.2	-1.19	1.61	-1.53	-0.392	-0.732	0.0793	-0.623	0.00856	-0.697	0.136
0.988	-0.748	-0.939	-0.303	-0.954	-0.502	-1.69	0.408	0.0454	1.52	-1.36	-0.412	-0.183	-2.09	-0.0608	0.184	-0.524	-0.158
-0.302	-0.069	0.582	-1.23	-2.18	-0.823	-0.514	2.01	-1.38	1.43	-1.95	-0.897	-1.45	-1.41	0.969	-0.0737	-0.267	-0.534
-0.457	-0.762	-0.0902	-1.25	-0.372	-1.02	0.349	1.21	0.144	0.939	-2.08	-0.443	-0.74	-0.579	0.797	-0.0188	-0.383	-0.837
-0.469	-0.723	0.0306	-1.07	0.0536	-0.218	-1.01	1.12	-0.631	1.19	-2.31	-0.579	-0.889	-0.112	0.0882	0.605	-0.381	-0.349
1.76	-0.121	-0.769	-1.05	-0.0544	-0.132	0.807	0.731	-0.447	1.1	-2.14	-0.375	0.0853	-0.255	-0.664	1.23	-0.396	-0.725
0.127	0.512	-0.751	-0.379	1.29	-0.653	-1.63	1.48	-1.44	1.31	-2.59	-0.422	-2.26	-1.63	-0.779	0.342	-0.562	-0.808
-0.129	0.217	-1.23	-0.195	0.353	-0.788	0.677	1.02	-1.03	1.39	-2.75	-0.246	-1.13	-0.614	-0.591	0.768	0.0749	-0.796
0.353	-0.0491	-2.25	-0.219	0.754	-0.8	-1.5	0.781	-0.369	1.77	-1.97	-0.283	-0.0769	0.654	0.0578	1.12	0.169	-0.488
1.28	-0.236	-1.35	-1.11	0.858	-0.32	0.352	-0.431	0.964	1.93	-1.27	-0.0589	-0.687	-0.29	-0.368	0.629	0.547	0.362
1.51	0.711	1.03	-0.461	1.97	-0.198	-0.0397	0.864	0.501	2.01	-0.955	0.199	-1.47	-0.127	-0.508	-0.0564	-0.0109	-0.085
1.5	0.809	1.14	-1.04	1.85	0.0344	-0.289	0.424	-0.867	1.35	-0.923	-0.409	-0.883	0.222	-1.13	-1.46	0.423	-0.411
-0.104	0.732	-0.188	-1.3	0.107	0.403	-1.34	0.632	-1.4	0.791	-1.52	-0.799	-1.72	-1.02	-0.838	-0.719	0.659	-0.0758
1.77	-0.0944	-0.948	-0.613	0.105	0.197	-0.166	0.572	-0.519	1.24	-0.71	-1.06	-1.32	-0.295	0.0583	-1.73	0.235	0.933
2.37	0.612	-2.03	-0.539	0.853	0.02	-0.895	1.3	-0.229	1.07	-0.486	-1.22	-0.293	-1.27	-0.636	-1.28	-0.173	1.18
1.02	1.09	0.365	-0.656	0.374	0.0374	-1.04	1.05	1.03	0.794	-0.589	-1.72	-1.07	0.332	-1.53	-1.43	0.384	0.72
2.35	1.39	0.676	-1.03	-0.222	0.632	-1.16	0.906	0.178	1.36	-0.549	-1.5	-1.62	0.996	-0.134	0.221	1.04	0.826
1.55	1.52	0.864	-0.486	0.381	0.718	1.8	0.457	1.18	0.423	-0.915	-1.46	-1.59	-0.776	-1.38	-0.171	1.4	0.695
0.46	1.33	-0.571	-0.302	-0.926	0.659	0.231	0.402	0.884	0.105	-0.242	-2.35	-0.99	0.926	0.115	-0.256	1.25	0.341
-0.514	2.16	-2.24	0.0646	-0.464	1.2	1.42	0.93	-0.464	-0.905	-0.295	-0.554	-1.05	1.14	0.171	-1.54	0.824	1.34
-0.696	1.94	0.519	0.245	-1	0.527	1.07	1.1	2.26	-1.12	-0.499	0.198	-0.138	-0.376	1.12	0.521	0.768	1.36
-0.873	0.423	-0.536	1.07	-1.16	-0.417	0.607	1.43	1.34	-0.861	-0.642	1.24	-0.045	-1.35	1.33	-0.31	0.162	0.541
-0.436	1.66	-0.962	1.65	-0.415	-0.407	-1.11	1.55	-0.822	-0.464	0.368	1.94	0.506	-1.05	1.59	-1.29	-0.198	1.77
-1.45	1.81	0.0805	0.908	0.353	-0.512	-1.19	0.78	-0.338	-1.42	-0.341	1.68	0.000951	1.47	2.13	-1.11	0.589	0.928
-0.186	-0.504	-0.0114	1.52	0.844	-0.525	1.56	1.92	-0.878	-1.19	0.37	1.38	-0.649	0.336	0.543	-0.666	0.629	0.651
0.164	0.274	-1.7	0.381	0.691	-0.62	0.955	0.992	0.0943	-1.45	0.471	1.88	1.13	-1.44	-0.498	-0.813	0.126	0.951
0.078	-1.13	-1.77	0.555	-0.206	-0.955	0.362	0.823	-1.26	-1.22	-0.0178	0.939	0.761	-0.416	1.82	-0.505	-0.101	0.268
-0.795	-0.0942	-0.335	0.717	-0.372	-0.72	-0.327	1.7	-2.07	-1.66	0.339	0.878	0.445	-0.666	0.0535	-1.43	-0.312	0.377
0.0676	-0.206	0.0271	0.705	-0.396	-1	-0.235	1.59	0.29	-1.39	0.856	0.675	0.554	-1.31	-0.786	-0.352	-0.684	0.137
-0.873	-1.57	-1.42	0.704	-0.646	-0.584	0.235	2.27	-0.318	-0.77	0.43	0.395	-0.47	-0.531	-0.542	-1.64	-1.21	-0.433
-0.834	-1.41	-0.734	1.04	0.472	-0.737	-0.599	0.488	-0.675	-1.83	1.51	-0.192	0.667	0.00213	-0.352	-0.924	-1.27	0.208
0.0389	1.32	0.461	1.23	0.396	-1.11	-0.617	-0.369	-2.47	-1.41	0.894	0.0349	-0.0517	0.0984	0.306	-1.17	-1.6	0.0299
0.105	1.03	0.149	0.736	0.464	-1.54	-2.08	1.02	0.904	-1.72	0.82	-0.0976	-0.993	0.058	-0.638	-0.973	-1.29	0.0122
0.707	1.05	-0.348	0.951	-0.161	-1.59	-0.261	-0.00636	-0.567	0.342	0.576	-0.397	0.336	0.0195	0.54	-0.274	-1.02	-0.0558
-0.531	1.11	-1.25	-0.0226	-0.529	-1.76	-1.08	1.52	0.544	0.458	1.01	-0.968	0.321	0.422	0.348	-0.226	-1.56	0.925
-0.759	0.179	1.22	0.469	-1.16	-1.28	0.69	1.1	1.18	-0.151	0.445	-1.13	-0.505	-1.38	0.17	-0.0881	-1.84	1.03
-0.303	0.46	0.163	0.972	-1.58	-1.23	-0.601	-0.0127	1.59	-0.861	-0.22	-1.49	0.894	-1.41	0.189	0.477	-2.48	0.214
1.59	0.0526	-1.84	0.9	-1.7	-1.19	0.487	0.933	0.106	-1.11	0.483	-0.712	0.809	2.13	-0.758	0.0445	-2.46	0.471
1.27	0.379	-1.02	1.47	-0.689	-0.892	-1.63	0.0362	0.356	-1.47	0.807	-0.31	1.6	-0.592	-0.695	-0.744	-1.94	0.731
0.861	2.69	1.42	0.68	-2.21	-1.23	0.508	-1.11	-0.889	-1.17	1.06	1.71	-0.366	0.654	1.41	-1.03	-0.733	0.733
0.269	2.3	1.3	0.173	-1.76	-1.37	-1.43	-0.91	0.526	-0.747	1.56	1.78	-0.229	0.977	2.04	-0.518	-1.17	0.5
-0.235	1.44	1.43	0.329	-1.65	-1.22	-2.13	-0.167	0.0993	-0.464	0.71	1.48	-0.382	-1.01	2.03	-1.63	-0.756	1.3
-2.69	-0.357	0.00911	0.73	-2.03	-1.13	-0.586	-0.288	-0.505	-0.338	0.786	1.78	1.08	-0.621	1.05	-1.35	-1.35	1.75
0.565	-0.0318	-0.156	0.369	-0.36	-1.07	0.56	-0.227	0.0531	-0.868	0.0592	1.42	1.28	1.3	0.183	-0.623	-1.65	2.41
0.269	1.98	0.384	-0.153	-0.00305	-1.2	0.153	-0.346	-0.286	-0.891	0.677	0.75	1.38	-0.143	1.24	-1.32	-1.47	2.18
0.543	1.25	0.262	-0.521	0.293	-1.21	-1.39	-0.0545	-0.00638	-0.296	0.69	-0.242	0.585	1.34	-0.867	-0.0851	-1.11	1.88
1.22	2.11	-0.257	0.179	-0.366	0.662	-0.685	0.113	2.17	1.43	-0.111	-0.924	1.24	-1.86	-0.259	-0.648	-1.14	1.62
-0.108	0.358	-1.8	0.245	-0.395	0.925	-1.23	-0.627	0.895	0.859	-0.0162	-1.14	0.0419	-1	1.2	-0.901	-0.495	1.34
-0.701	-0.932	0.767	0.0902	-0.661	0.218	0.179	-0.892	0.776	-0.254	-1.29	-1.5	0.265	-0.299	0.674	-1.62	-0.566	0.521
-0.474	0.257	2.34	-0.00534	0.764	-0.32	-0.734	-1.64	-0.636	-0.476	-1.52	-0.985	0.9	0.347	0.104	-1.6	0.37	-0.268
0.386	-1.78	0.296	0.165	0.384	-0.729	-1.1	0.0833	-0.241	-0.399	-1.22	-1.07	0.248	1.16	-0.598	-1.28	-0.542	0.157
0.355	-0.747	-0.877	0.00323	1.65	-0.734	-0.044	-1.49	-0.507	0.0182	-1.56	-0.976	-0.087	-0.253	-1.61	-0.0458	-0.561	0.29
-0.223	-0.471	0.626	-0.554	1.03	-0.573	-0.509	-0.0218	-1.31	0.102	-0.991	-0.374	0.405	-0.238	-0.645	-0.31	0.52	0.791
-0.857	0.593	-1.04	-0.909	3.09	-0.589	1.63	-0.967	-0.974	-0.0316	-0.832	-1.15	0.133	0.614	0.884	-0.436	1.29	0.872
-1.75	0.413	0.721	-0.953	2.12	-0.23	2.41	-1.1	-1.05	-0.847	-0.293	-0.663	0.212	1.26	0.208	-0.995	1.11	1.01
-2.3	-0.5	-0.0529	-1.12	1.43	-0.134	0.347	-1.51	0.0869	-0.566	-0.525	-0.509	0.548	1.96	-0.31	-1.55	0.537	0.903
-1.36	-1.09	-0.113	-1.32	0.796	0.183	0.983	-0.821	-0.149	0.0249	1	-0.765	-0.427	2.13	-0.0878	-1.71	0.839	0.729
0.0297	-2.2	0.0973	-0.714	0.194	0.0382	-1.57	0.104	0.199	-1.76	1.46	-0.211	0.702	0.725	-0.813	-1.59	1.18	0.479
0.416	0.852	-0.527	-0.357	0.934	0.258	1.12	-0.509	0.229	-1.81	1.23	-1.02	2.7	1.01	-0.595	0.815	0.995	-0.0704
-1.04	-0.761	-0.549	-0.286	1.11	0.36	-0.637	-0.928	0.756	-1.79	1.01	-1.14	0.866	-0.167	0.00438	1.15	0.452	0.0948
-0.196	-0.457	1.49	-0.927	1.11	0.000796	0.784	-1.15	0.364	-0.809	0.55	-0.745	0.98	0.564	-0.116	1.16	0.705	-0.169
-1.25	-0.65	2.1	-1.42	1.15	0.00726	0.508	-2.05	0.683	-0.61	1.32	-0.857	1.99	-1.19	0.112	1.55	1.07	-0.735
-0.126	-0.389	-0.117	-1.69	1.07	-0.205	-0.346	-1.75	-1.57	-0.636	1.21	-0.13	1.7	-1.36	0.224	1.63	1.42	-0.271
-0.417	-0.257	-0.245	-1.51	1.88	-0.123	-0.61	-1.01	0.153	-0.398	0.334	1.07	2.12	1.07	-0.159	1.66	2.09	-0.711
0.0723	0.187	1.1	-0.704	2.08	-0.114	1.06	0.452	0.964	-0.704	0.952	-0.0835	1.35	0.186	-0.997	1.96	1.97	-0.482
-0.294	0.236	1.24	-0.266	0.6	0.0685	1.82	-0.976	0.242	-0.514	0.826	-0.225	0.46	-0.328	-0.148	1.58	1.99	-0.407
1.43	-1.01	0.356	-0.225	1.06	0.0233	0.299	-0.375	0.312	-0.669	1.45	-0.0428	1.73	-0.68	1.5	1.58	1.35	-0.945
1.2	-1.56	1.34	-0.794	-0.251	-0.0136	1.11	0.0574	1.15	0.112	0.807	-0.341	-0.143	-0.593	1.97	1.03	1.27	-0.582
1.09	-0.436	0.0384	-0.728	0.109	1.53	-1.19	-0.769	-0.559	0.208	0.631	-0.69	0.255	0.375	2.4	-0.236	1.37	-0.992
-0.983	-0.449	0.897	0.00818	0.15	2.45	-0.176	-0.542	-0.599	-0.017	0.263	-1.03	-0.428	0.114	-0.0956	-0.25	0.936	-0.439
-0.557	-0.288	-0.142	-0.54	-0.136	2.19	0.481	-1.15	0.563	0.641	1.05	-0.908	-0.65	0.522	1.02	0.7	1.04	-0.67
-0.211	-0.961	1.12	-0.941	-0.769	2.57	0.625	-0.921	-0.471	0.232	1.33	-0.875	-0.476	-0.429	-0.832	0.59	1.44	-0.984
-0.865	-0.0577	0.0298	-0.855	0.25	2.69	0.273	-0.899	-0.0268	1.83	1.12	-0.614	-0.993	0.349	1.81	-0.0983	1.3	-0.791
1.09	-0.307	1.55	-0.97	0.191	1.83	0.839	-0.76	0.196	0.898	1.43	-0.692	-0.631	-0.186	1.42	1.32	1.18	-1.23
-0.257	-1.07	0.489	-0.368	-0.538	0.985	0.0799	-0.982	-0.636	0.096	0.529	1.43	-1.5	1.11	3.09	0.848	1.53	-1.08
-0.322	-0.281	-1.67	-0.781	-0.263	0.519	0.525	-1.03	0.0497	0.141	0.732	1.13	-0.195	-0.506	0.849	1.42	1.18	-0.839
-1.01	-0.69	0.16	-0.894	0.249	0.516	-1.17	-0.571	-0.956	0.462	0.274	0.802	-1.17	-2.12	-0.734	1.66	1.23	-0.779
-0.847	-0.141	-1.06	-1.08	0.544	-0.0841	0.72	0.00785	0.377	1.56	0.229	1.19	-1.5	-0.616	-0.711	1.74	0.64	-0.737
-2.23	-0.132	-0.935	-0.58	0.36	-0.321	1.46	-1.76	-1.7	1.25	-0.433	1.19	-1.73	-0.187	0.115	1.1	-0.102	-0.0914
-1.2	0.685	0.021	-0.901	-0.0794	-1.07	1.62	-0.565	0.986	0.16	-0.432	0.838	-0.97	-1.54	-0.318	0.175	-0.382	0.996
-0.0695	-1.39	1.47	-1.04	-0.0696	-0.997	1.45	0.039	0.253	0.278	-0.341	-0.0498	-0.0827	0.753	0.545	0.731	0.17	1.78
1.28	0.171	0.313	-0.545	0.784	-0.741	0.0571	-0.678	1.38	0.0145	-0.0301	-0.142	-0.436	2.3	0.643	0.71	-0.364	0.696
2.02	-1.28	-1.18	-0.477	-0.148	-0.998	-0.248	-1.24	1.91	0.1	0.00964	0.234	-0.315	0.356	-0.956	1.1	0.068	-0.233
0.473	-1.19	0.15	-1.27	0.187	-0.574	0.576	-0.501	0.527	-0.252	0.178	1.74	-0.144	-0.122	-1.11	0.81	0.196	-0.136
-0.701	-1.16	0.259	-0.937	0.545	-0.171	-0.171	-1.57	0.246	0.00347	-0.364	1.7	0.0581	0.797	-2.12	0.692	0.256	-0.104
-2.17	-1.07	2.17	-0.44	0.293	1.44	2.18	-0.615	-0.332	0.797	-0.151	1.43	0.155	-0.0587	-0.998	-0.112	0.0709	-0.39
-0.907	0.648	0.842	0.141	0.0258	1.42	0.442	-1.13	2.56	0.534	-0.0725	1.63	0.631	0.437	-0.648	-0.113	-0.22	-0.389
-0.459	-0.454	-1.63	-0.0196	-0.19	1.33	1.31	-0.219	1.51	0.425	0.508	1.93	1.17	2.51	-0.712	0.163	0.229	0.309
-0.659	-0.543	-0.802	1.58	0.186	1.33	0.787	-0.0135	1.44	0.181	0.326	1.59	1.14	1.03	0.377	1.09	-0.166	-0.462
0.504	-1.64	-0.197	2.1	-0.395	1.91	0.238	0.847	0.138	0.792	0.786	0.38	1.27	-0.335	-0.663	1.72	0.165	-0.811
0.333	-0.901	0.0903	2.32	0.203	2	0.257	0.181	0.016	-0.34	0.176	-0.577	1.67	0.173	-2.02	0.818	-0.373	-1.54
0.895	-0.182	1.37	2.78	-1.42	1.04	-1.46	-0.529	0.128	-0.24	0.892	-0.626	1.03	1.86	0.296	0.8	-0.248	-2.15
-0.769	-1.48	1.67	2.25	-1.48	0.746	0.429	-0.793	0.349	-0.115	0.778	0.408	1.11	1.53	0.016	0.949	-1.1	-2.12
0.223	-1.05	0.358	2.47	-0.96	0.996	0.501	0.0292	2.21	0.153	0.992	0.97	0.694	0.21	-0.926	1.24	-1.39	-2.06
0.966	-0.117	-0.285	2.11	-0.606	1.31	-1.31	-0.0997	0.349	-0.979	0.648	0.752	0.201	-0.555	-1.01	0.288	-0.776	-2.08
0.355	-0.041	-0.323	1.76	-0.676	1.84	-0.956	-0.414	0.904	-0.712	0.112	0.888	0.784	0.207	-0.542	0.445	-0.269	-2.16
0.688	-0.701	0.16	1.26	-1.86	0.999	0.209	-0.794	-0.827	-0.951	0.337	-0.171	-1.95	-1.23	-0.479	0.298	-0.939	-2.02
0.369	-0.249	-0.13	1.14	-1.37	0.758	0.71	-0.499	-1.27	0.88	0.318	0.0207	-1.28	-0.503	-0.77	-0.136	-1.02	-1.86
0.285	0.00814	0.0967	1.1	-1.28	0.175	-1.42	-1.47	-1.12	0.584	0.42	0.054	-0.91	0.834	-1.12	0.691	-0.668	-1.59
-1.69	-0.0667	0.458	1.44	-0.417	0.0994	-0.526	-0.481	-2.72	1.09	0.66	-0.00629	-1.62	1.4	-1.71	0.303	-0.688	-1.49
-0.399	-1.54	-0.0115	0.35	1.08	0.0784	0.406	-0.711	-1.76	1.47	1.75	-0.663	-0.808	-1.01	-0.687	0.735	-0.913	-1.3
-1.55	-0.457	0.377	0.419	1.76	-0.354	-0.0432	0.235	0.252	1.47	0.802	-0.6	-1.01	-0.388	-1.24	0.788	-0.317	-1.38
-0.307	-0.325	1.39	0.506	1.34	-0.412	0.899	0.0426	-0.396	0.398	0.327	-1.08	-0.171	0.632	0.395	-0.235	-0.522	-1.96
0.675	-0.477	-0.222	0.568	0.581	-0.223	1.51	-0.262	-1.62	0.791	0.0539	-1.29	-2.23	2.1	0.214	-1.17	-0.852	-1.55
0.787	0.416	0.0576	-0.304	1.14	-0.284	0.958	-0.398	0.222	-0.643	-0.662	-0.544	-2.26	1.93	-0.54	0.167	-1.13	-0.429
-0.965	-0.212	-1.13	0.226	0.668	0.579	-2.92	-0.123	-0.0762	0.119	-1.46	0.526	-1.32	0.0885	-0.942	-0.389	-1.07	-0.869
-1.5	-0.516	0.845	0.0727	1.38	0.283	-0.531	0.111	-0.873	0.425	-1.86	0.599	-0.794	-2.39	-1.02	-0.565	-1.31	-0.713
0.109	0.0925	0.415	0.134	1.72	-0.384	0.00899	0.173	-0.963	0.524	-1.53	0.634	-1.15	-1.26	-1.03	0.19	-1.15	-0.571
0.186	-1.57	0.0807	-0.387	1.11	-0.605	0.854	-0.244	-0.0364	-0.32	-2.05	0.839	-1.34	-1.25	-0.723	0.202	-1.62	0.0848
-0.811	-2.33	1.19	-0.116	1.88	-0.644	1.55	0.119	-0.71	-0.445	-2.7	0.747	-0.668	-0.211	-0.588	0.0123	-1.45	-0.04
1.42	-0.687	1.12	0.0708	1.42	-0.572	-0.896	-0.508	-0.396	0.377	-2.05	0.495	-2.1	1.28	-1.03	0.174	-1.78	-0.0274
1.98	-1.26	1.6	-0.25	1.31	-1.04	2.48	-0.294	-1.85	0.555	-1.9	0.703	-2.26	1.74	-0.773	0.465	-1.77	-0.00655
-0.151	-0.7	0.841	0.0348	0.748	0.216	0.922	-0.981	-1.03	0.367	-2.15	0.227	-1.19	-0.188	-0.266	-1.14	-1.91	-0.303
0.631	-0.215	0.845	-0.607	1.53	0.303	0.823	-0.556	-1.92	-0.925	-2.29	0.0166	-0.789	0.707	-0.623	-0.619	-1.33	-0.283
1.28	0.62	0.521	-0.346	0.794	0.648	1.83	-1.06	-1.05	-0.855	-0.9	0.522	-0.968	-0.283	-1.02	0.419	-1.96	-0.656
-0.728	-0.989	0.38	0.504	0.0093	1.12	1.25	-0.349	0.17	-0.741	-1.84	0.645	-1.62	-0.00875	-1.01	0.004	-1.57	-0.992
-0.523	-0.00218	-2.86	0.679	0.712	0.598	0.475	0.115	0.923	-0.384	-2.41	0.755	-1.62	1.74	-0.418	-0.288	-1.34	-0.614
-1.24	-1.88	0.383	1.26	-0.129	0.952	0.87	-0.667	-0.624	-0.438	-1.69	0.809	-2.22	-0.103	-0.682	0.514	-1.29	-1.1
0.0866	-1.1	0.84	0.676	-0.286	0.377	1.09	-2.33	0.656	0.13	-1.48	1.07	-1.56	1.17	-0.352	1	-1.04	-1.34
-0.0188	-0.877	0.605	1.11	-0.224	0.0898	0.864	-2.89	-1.35	-0.419	-1.43	0.639	-2.13	1.94	0.35	0.498	-1.06	-2.09
-0.789	-0.98	2.91	0.982	-0.0622	0.899	1.07	-2.45	-1.51	-0.0274	-1.61	0.533	-1.2	-1.54	-0.391	0.499	-1.53	-1.91
-1.68	-1.21	3.35	1.1	-1.06	1.38	1.21	-2.44	-1.57	0.711	-1.34	-0.239	-1.76	-1.15	-0.786	-0.325	-1.54	-1.4
-0.834	-1.58	0.938	0.962	-1.12	0.699	2.12	-1.63	0.136	0.885	-1.84	-1.08	-0.511	0.114	-1.92	-0.0139	-1.9	-1.5
-1.73	-0.379	1.09	-0.119	-0.574	0.228	-0.902	-0.926	-1.87	1.14	-2.25	-1.34	-0.226	1.05	-1.2	0.115	-1.12	-1.36
-0.495	0.147	-0.625	0.132	-0.323	-0.091	1.03	-1.77	-0.986	-0.145	-2.3	-0.618	-0.0253	0.0989	0.222	0.395	-0.469	-0.859
-0.709	0.901	1.85	-0.0166	-0.591	0.381	0.872	-4.05	-0.55	0.348	-1.76	0.737	-1.46	-0.804	-0.226	0.805	0.384	-1.7
-0.726	-0.454	0.824	0.786	-0.634	0.0558	0.688	-2.12	-0.792	1.66	-1.95	1.85	-1.64	-0.502	-1.63	0.112	0.535	-1.39
-1.6	-0.447	1.6	-0.309	-0.0326	-0.253	1.02	-0.788	-2.08	0.833	-2.25	2.64	-0.886	-0.537	-3.31	0.63	-0.0881	-0.986
-0.827	-0.174	1.43	0.472	0.224	-0.393	0.427	-0.712	-1.11	1.11	-1.7	2.89	-1.59	-0.889	-2.73	0.713	0.0282	-1.47
-0.0312	-1.49	-0.457	1.1	0.559	-0.354	2.44	-1.11	0.101	0.405	-2.27	1.91	-1.47	0.452	-2.33	0.473	-0.39	-1.31
-0.904	-0.296	1.28	0.954	1.26	-0.257	1.02	-0.969	-2.36	0.968	-2.07	1.01	-2.26	0.0735	0.316	0.318	0.0233	-0.698
-0.966	-0.989	0.289	0.0814	1.55	-0.402	-0.698	-0.186	-2.13	0.409	-2.65	0.374	-1.72	0.945	0.172	0.785	-0.173	-0.44
-0.547	-0.546	0.0967	0.449	-0.072	-0.766	-0.204	-0.829	-0.831	-0.559	-2.26	0.0631	-0.805	1.77	-0.386	0.946	-0.0196	-0.929
0.356	-0.83	-1.39	-0.131	0.7	-0.828	0.18	-1.72	-0.922	0.0156	-2.89	-0.311	-1.68	2.47	-0.431	1.41	-0.328	-0.779
-1.36	-0.201	-0.544	0.253	2.34	-1.21	0.0195	-0.586	-2.04	0.353	-2.38	-0.0759	-1.7	1.62	-1.6	0.509	-0.457	-1.07
0.223	0.419	0.34	-0.0401	2.6	-0.946	1.57	0.0454	-0.483	0.184	-1.7	-0.388	-0.798	2.16	-0.000731	-0.0425	-0.3	-1.9
-1.15	-2.04	1.85	-0.185	2.19	-1.09	0.22	-0.413	-2.46	0.141	-2.09	0.312	-0.476	2.03	0.719	0.586	0.311	-2.1
0.05	1.19	0.793	0.602	2.27	-0.666	0.301	1.01	-1.12	-0.0842	-3.02	0.468	-0.562	0.28	-1.01	0.314	0.157	-2.43
-0.256	-0.895	-0.137	0.0666	1.31	-0.833	-0.166	0.25	-0.85	-0.362	-2.44	0.0863	-0.764	0.628	0.104	0.227	0.0506	-2.4
-1.33	-0.151	0.371	-0.392	1.54	-0.277	0.745	-1.05	-1.38	0.22	-2.04	-0.469	-0.909	3.98	-1.65	0.515	0.121	-2.6
-1.04	-0.114	0.506	-0.561	0.124	-0.425	-2.23	-1.26	-2.27	-0.452	-1.99	0.0573	-0.879	1.38	-0.781	0.668	0.19	-2.52
-0.264	-1.1	0.9	-0.0146	-0.0838	-0.678	-2.8	0.146	-0.00215	-0.385	-2.07	0.641	-1.16	1.38	-0.53	-0.138	-0.275	-1.64
-0.724	-1.11	0.898	-0.102	0.752	-0.149	-0.563	-1.03	-0.165	0.795	-2.52	0.412	-1.98	1.91	-1.43	-0.279	-0.172	-2.22
-0.669	-1.52	-0.556	-0.443	0.028	-0.347	1.26	-0.0817	-1.96	-0.0416	-1.74	1.43	-2.13	2.23	-1.58	0.471	0.289	-1.63
-1.21	-0.346	0.0645	-0.739	0.309	0.0371	-0.589	-0.449	-1.04	-0.401	-1.72	1.86	-0.74	1.78	-0.0575	-0.0733	0.306	-1.81
0.174	-1.15	0.926	-0.244	0.872	0.383	2.34	-1.25	0.0493	0.642	-1.8	2.07	-0.5	0.824	-0.0403	-0.00214	0.735	-1.5
1.88	-0.508	1.28	-0.292	1.17	0.569	-0.936	-0.852	-1.03	0.348	-2.11	1.68	-0.229	0.76	-2.68	0.249	0.179	-0.647
1.23	0.0251	-0.214	-0.159	0.729	1.14	0.673	-0.728	-1.5	0.919	-2.38	0.966	0.876	1.45	-1.61	0.831	0.266	-0.574
0.277	-0.439	-1.57	-0.267	1.64	0.45	-0.379	-1.51	-1.64	-0.446	-2.71	0.708	-0.0711	-0.163	-1.73	-0.0253	0.34	-0.564
-0.0585	0.508	-0.431	-0.0143	-0.025	-0.124	-0.992	-3.28	-1.82	-1.11	-2.47	-0.00526	-1.5	0.691	-1.51	0.0799	0.148	-1.22
0.872	0.111	-0.271	0.187	-0.385	-0.0404	1.61	-2.1	-2.42	-0.662	-2.85	-0.0441	-1.71	0.666	-1.37	-0.834	-0.044	-0.0389
-0.201	0.121	-0.645	0.541	0.434	-0.354	0.379	-1.88	-0.882	0.197	-2.83	0.112	-0.725	0.623	-1.24	0.0762	0.129	-0.46
-0.54	0.0943	-0.774	1.16	-0.45	-0.293	1.09	-0.75	-1.22	-0.921	-3.43	-0.201	-0.213	0.625	-0.999	-0.0365	0.108	-0.488
-0.0518	0.317	-1.1	0.62	0.0825	-0.582	-0.282	-1.12	-1.16	-0.391	-3.18	-0.421	0.143	2.08	-1.07	-0.0369	-0.105	-0.081
-0.354	-0.392	0.666	0.393	-0.453	0.531	-1.99	-1.13	-0.434	-0.18	-3.59	-0.339	0.182	2.69	-2.19	0.1	-0.272	0.185
-1.11	0.975	0.364	-0.415	0.435	0.864	1.56	-1.73	-0.517	0.86	-3.73	0.224	-0.13	3.34	-2.88	-0.466	0.00756	1.3
0.329	0.218	1.45	-0.089	0.638	1.72	2.12	-0.953	0.576	-0.464	-3.1	0.952	0.228	0.43	-0.0683	-0.677	0.0615	0.565
-0.391	0.141	0.28	-0.712	0.659	1.31	1.28	-1.97	-0.382	-0.839	-3.3	2.64	0.157	2.03	0.0437	-0.383	-0.032	-0.181
0.72	0.195	1.14	-0.781	-0.068	0.979	-1.34	-0.643	-0.386	-1	-3.01	1.88	-0.515	0.859	-0.963	-0.507	-0.17	-0.65
-1.22	-0.379	-0.39	-0.114	0.426	0.523	2.23	-0.36	-1.06	0.271	-3.07	1.4	-0.575	3.27	-0.371	-0.0436	-0.356	-1.7
0.163	-1.23	-0.382	0.129	-0.655	0.199	-0.618	-1.07	-1.46	0.574	-3.18	1.5	-0.856	1.86	-1.17	-0.227	-0.101	-1.81
-0.376	0.964	-0.181	-0.434	-0.861	0.0216	-0.549	-0.366	-1.85	0.549	-3.44	1.26	-1.16	1.4	-0.00841	0.216	0.0685	-1.63
-0.227	-0.111	0.134	-0.328	-1.08	0.423	1.9	-1.59	-0.825	1.09	-3.24	1.46	-0.0443	2.95	-2.28	-0.25	-0.441	-1.2
-0.878	0.498	0.256	0.652	-1.49	0.333	1.13	0.61	-1.39	-0.142	-2.84	1.72	1.33	4.03	-1.08	-0.102	0.00105	-1.16
-0.239	0.364	2.59	1.37	-0.388	0.408	0.847	-1.02	-3.59	-0.329	-2.41	1.85	0.113	3.03	-1.96	-0.0858	0.359	-1.5
0.976	0.823	0.797	1.54	-0.669	0.233	0.947	-0.15	-1.68	-0.207	-1.56	1.97	-0.00665	1.73	-1.24	-1.42	-0.0738	-1.22
0.276	0.0974	0.827	1.6	-0.644	-0.173	1.11	-0.15	-1.68	-0.762	-1.61	2.74	-0.884	4.22	0.154	-0.343	0.305	-1.69
0.85	-0.367	-0.326	0.51	-0.798	-0.722	2.11	-0.978	-1.14	0.0958	-2.45	2.69	-0.892	2.97	-0.946	-0.117	0.289	-1.2
0.448	1.42	1.75	-0.167	-1.54	-0.813	1.3	0.143	-1.8	-0.306	-2.46	3.25	-0.969	3.34	-1.87	-0.158	0.156	-1.45
1.09	-0.351	-1	-0.055	-1	-0.517	-0.252	1.06	-1.2	-0.163	-2.47	2.45	0.378	4.38	-0.848	-0.272	0.155	-1.44
-1.54	0.284	1.78	-0.276	-0.989	-1.03	0.548	0.22	-0.749	0.705	-1.87	1.88	-0.724	0.519	-1.97	-0.778	-0.737	-1.06
-1.81	-0.153	-0.528	-0.425	-1.34	-0.626	1.5	1.44	-0.952	0.164	-1.97	1.57	1.32	0.371	-1.08	-0.281	-0.859	-0.277
0.581	2.33	-0.115	-0.124	-0.655	-0.367	0.743	-0.0278	-0.00448	0.0403	-1.44	0.839	-0.222	1.35	-1.32	-0.639	-0.976	-0.265
-0.0443	0.855	-0.304	-0.171	-0.767	-0.433	0.076	-0.505	-0.524	0.149	-1.81	1.64	-0.319	2.2	-1.43	-0.255	-1.16	-1.22
-0.361	-0.141	-0.94	-0.85	0.0284	-0.933	-1.12	0.0664	0.379	0.628	-1.99	1.72	0.032	1.16	-2.82	-0.436	-0.947	-2.1
-0.729	-0.854	0.301	-0.366	0.331	-1.53	-1.06	0.5	0.315	-0.563	-1.78	1.86	-1.14	2.99	-2.06	0.528	-0.847	-2.09
-1.27	-0.819	1.13	0.252	-0.254	-1.7	0.683	0.0879	-0.691	0.114	-1.88	2.36	0.939	2.66	-1.85	1.21	-1.56	-1.69
1.31	0.574	-0.0272	-0.612	0.372	-1.65	0.563	-0.22	-2.15	-0.133	-2.19	1.73	0.329	1.37	-1.46	-0.411	-1.96	-1.52
1.31	0.136	0.801	-0.703	2.26	-1.7	1.3	1.34	-1.33	-0.0165	-0.95	1.77	1.91	1.84	-1.77	-0.62	-2.18	-1.69
-0.544	0.16	-0.656	-0.754	3.12	-1.5	-0.796	-1.02	-1.9	-0.401	-1.65	1.65	0.663	1.48	0.165	-0.871	-2.46	-1.68
-0.625	-0.629	0.832	-0.35	2.56	-1.33	-0.294	-0.265	-1.34	0.293	-2.9	0.781	0.847	1.07	-1.96	-0.529	-2.28	-0.933
-0.649	-0.947	-0.571	-0.107	3.38	-1.46	1.02	0.34	-0.827	-0.801	-3.06	0.56	-0.00804	2.02	-1.06	-0.182	-1.73	-0.668
-0.603	0.0623	0.135	-1.71	1.58	-1.29	-1.14	0.783	-0.353	-0.523	-3.01	0.672	0.647	1.99	-1.07	-0.0473	-2.12	-1.35
-0.828	-1.35	-0.869	-1.27	3.32	-1.17	1.19	0.773	-0.753	-0.111	-2.27	0.761	1.41	2.8	-1.01	-0.915	-1.9	-0.493
0.785	0.744	0.688	-1.04	2.99	-0.457	-0.00889	-0.707	-1.31	0.483	-2.8	0.145	2.52	2.59	-1.45	0.437	-1.75	0.507
-1.58	-1.9	1.09	-0.49	2.2	-0.12	0.816	0.569	-2.27	0.58	-2.84	-0.234	1.4	2.04	-1.44	0.0616	-1.51	1.25
-0.415	0.627	-0.45	0.0249	2.48	-0.395	0.654	0.537	-1.11	0.121	-3.17	-0.204	1.3	3.09	-1.75	-0.583	-1.33	0.712
0.689	-0.498	-0.178	-0.0649	2.79	-0.679	-0.882	-0.0554	-0.117	0.512	-2.69	0.193	2.95	1.5	-2.22	-0.373	-1.05	0.486
2.21	-0.475	1.12	-0.616	2.57	-0.287	1.28	0.271	-1.68	0.211	-2.39	0.466	1.73	1.77	-1.85	-0.763	-1.24	-0.24
2.61	-0.262	1.07	-0.145	1.93	-0.407	-0.674	-0.293	-1.38	0.393	-2.25	0.00807	3.14	2.09	-1.24	-0.9	-1.47	-1.34
-0.0704	-1.42	-0.037	-0.0188	2.2	-0.884	0.254	-0.532	-3.19	-0.0468	-0.731	-0.226	2.28	3.34	-2.51	0.219	-1.83	-1.85
1.36	-1.44	1.16	0.581	1.74	-1.04	1.22	0.00135	-1.92	0.628	-0.942	-0.926	2.79	2.4	-0.847	0.959	-2.03	-1.78
-0.823	-1.33	0.0818	0.383	2.55	-1.46	1.98	0.0774	0.0203	0.565	-0.6	-0.97	2.95	0.478	-1.06	1.11	-1.96	-0.922
0.971	-1.3	0.338	0.945	1.77	-1.35	-0.338	-0.0338	-1.19	1.67	-1.51	-1.22	3.02	0.405	-1.04	0.441	-1.41	0.498
0.302	-0.273	0.0934	1.36	2.16	-1.26	-1.65	0.761	-2.06	1.78	-1.48	-1.09	2.96	0.971	-2.21	0.0445	-0.648	0.0287
-0.261	-0.0647	1.24	1.31	1.38	-1.51	-0.134	-0.122	-1.12	1.22	-2.37	-0.98	2.01	-0.466	-0.954	1	-0.436	0.027
-0.914	0.189	0.263	0.957	1.46	-1.39	-0.383	-0.698	-0.977	0.685	-1.27	-1.33	3.23	-0.771	-1.87	1.94	0.0579	1.58
0.603	0.516	3.06	0.799	0.9	-0.882	0.823	-1.38	0.0386	1.24	-1.31	-0.538	2.59	-0.867	-1.04	1.58	0.246	1.37
1.36	0.437	0.304	0.681	1.53	-0.368	-0.0788	-0.338	-0.499	1.29	-1.88	1.14	2.71	-1.11	0.352	2.08	0.296	1.42
1.21	0.451	2.37	1.61	4.52	1.59	-0.946	0.166	-0.135	1.28	-1.46	3.37	2.17	0.167	0.84	2.05	-0.268	1.78
2.08	1.53	2.08	0.772	4.81	1.43	-0.606	-0.809	-0.701	-0.636	-2.39	2.44	2.27	2.19	0.0696	2.21	-0.709	0.657
2.73	-0.0498	1.96	0.526	3.17	1.32	2.28	0.425	-1.51	0.952	-2.1	2.15	1.55	0.986	-0.366	1.1	-0.817	0.478
1.15	1.81	2.21	0.261	4.43	1.09	1.77	0.788	-1.11	3.19	-1.94	2.19	1.99	-0.581	0.354	0.793	-0.809	0.429
1.09	2.18	3.53	0.0461	2.94	0.891	0.799	-0.0565	-0.188	4.23	-1.39	1.64	2.12	-1.72	0.0178	0.244	-0.592	0.408
0.513	3.83	1.92	0.741	3.2	0.61	2.38	0.57	-1.37	3.33	-1.69	1.71	2.86	-0.978	-0.391	1.15	-0.755	0.388
0.485	2.05	1.16	0.546	2.94	0.308	3.58	0.493	-1.02	3.93	-1.89	1.09	1.07	-0.841	-1.67	0.0979	-0.333	0.18
1.16	1	0.168	0.347	2.84	0.0439	0.73	0.0435	-0.874	2.76	-1.61	2.11	2.01	0.158	-1.54	-0.448	-0.485	-0.179
1.8	0.12	1.03	-0.115	2.56	-0.00674	1.14	0.939	1.13	3.75	-1.13	1.98	1.52	1.27	-0.0209	-0.564	0.225	0.141
1.43	0.835	2.17	0.27	2.35	0.288	1.98	-0.23	1.29	3.48	0.603	2.78	1.52	1.03	-0.361	-0.544	1.45	0.61
0.731	0.0094	2.76	0.217	2.64	-0.197	0.528	-0.937	1.16	2.81	-0.0737	2.17	1.85	-0.37	0.198	-0.488	3.7	0.29
1.28	1.38	2.3	0.115	1.81	-0.276	0.127	0.00915	-2.34	2.55	-0.626	2.17	1.51	1.15	0.683	0.304	3.27	-0.157
-0.721	3.22	1.65	-0.429	2.04	-0.95	1.63	0.144	0.437	2.14	-1.18	2.26	2.32	0.648	1.97	-0.587	3.4	-0.0326
1.64	1.58	1.85	-0.318	1.12	-0.42	1.37	0.109	0.0355	2.16	-1.17	1.45	2.2	1.46	2.17	-0.731	3.29	-0.229
1.23	0.108	1.35	0.401	2.4	0.655	0.641	0.935	-0.856	2.02	-1.78	1.84	2.2	1.22	3.16	-0.448	3.15	-0.327
0.105	0.976	2.72	0.304	2.03	1.48	1.74	-0.767	-0.856	3.36	-1.66	2.18	2.2	1.78	2.3	-0.693	3.06	0.00287
-0.968	0.914	1.69	0.747	2.58	1.51	1.28	0.246	0.344	3.99	-1.59	1.9	2.03	1.41	3.11	-0.481	2.57	0.0298
0.873	0.651	1.52	0.294	4.31	1.39	1.68	0.242	0.37	3.11	-1.69	1.48	2.42	1.81	0.737	0.494	2.9	0.403
0.922	-0.336	2	-0.0661	4.31	1.69	1.29	-1.03	0.728	2.68	-1.42	0.455	2.97	1.44	1.6	-0.361	2.8	0.97
3.08	0.661	1.4	0.571	4.12	1.09	2	-0.482	1.3	2.55	-1.96	-0.34	3.09	0.643	1.69	-0.609	2.84	0.0841
2.55	1.62	1.43	-0.246	4.44	0.602	0.00891	0.108	0.503	2.47	-2.22	-0.235	1.88	0.42	3.2	0.00823	2.45	0.26
0.507	0.886	-0.0304	-0.92	4.13	0.0619	0.631	0.765	-0.257	2.52	-2.01	-0.514	3.38	1.29	1.11	0.0191	2.59	-0.135
1.77	1.61	2.37	-0.384	5.16	0.157	4.17	-0.936	0.377	6.95	-2.46	-0.396	2.71	1.46	1.98	0.174	2.3	-0.643
-0.00459	0.823	1.91	0.604	4.26	-0.23	1.67	0.716	0.632	7.42	-2.4	-0.713	2.65	0.629	1.58	0.313	2.6	-0.609
0.143	0.485	0.219	0.212	3.88	-0.497	1.7	-0.376	-0.555	5.76	-2.27	0.145	2.81	0.142	0.58	0.415	2.13	-1.44
1.53	0.606	2.6	0.967	3.69	-0.176	-0.0839	0.0454	0.0845	4.79	-1.9	0.119	2.35	1.24	1.75	-0.179	2.55	-0.968
2.62	1.13	0.251	-0.08	4.56	0.488	0.986	-0.15	-1.03	5.19	-1.68	0.712	1.56	2.89	1.61	0.652	2.23	-1.21
3.31	-0.215	1.47	-0.38	3.46	0.205	2.17	-0.0509	-0.412	5.78	-1.57	0.243	2.16	0.343	2.07	0.816	2.08	-0.916
0.345	0.455	2.26	-0.0101	3.84	0.154	2	-0.251	0.267	5.65	-0.04	0.0771	2.1	0.541	2.13	1.1	2.59	-0.947
0.864	1.09	1.66	0.105	3.3	0.583	2.3	0.427	-1.69	5.72	1.5	0.315	2.11	3.94	2.19	0.677	2.04	-0.887
0.00955	2.43	1.15	0.0926	2.9	0.225	1.69	0.31	-1.94	5.68	4.16	0.899	1.12	2.92	1.71	0.327	2.31	-1.52
1.13	0.521	3.23	0.563	2.41	0.724	0.214	0.243	-1.93	5.23	4.57	0.299	2.53	3.53	1	0.68	2.56	-1.28
0.783	0.475	2.13	-0.277	2.13	0.776	2.2	-0.511	0.394	5.67	3.82	-0.137	1.95	3.79	0.78	0.878	2.99	-0.739
0.541	0.697	3	-0.129	3.52	-0.0555	2.12	0.831	-0.183	5.59	2.5	-0.0147	3.78	4.05	1.19	0.566	2.85	-0.456
2.14	0.471	1.55	-0.348	2.57	-0.125	2.2	0.614	1.84	3.72	2.6	0.401	3.53	1.65	1.14	0.951	2.65	-0.391
1.8	1.94	-0.272	-0.215	3.15	-0.025	0.955	1.05	1.76	3.82	3.84	0.589	4.63	3.34	0.364	0.541	2.4	-0.375
2.85	1.61	-0.21	0.195	3.58	-0.028	0.354	0.448	2.13	4.17	6.62	0.993	4.02	4.08	1.89	0.924	2.17	0.0632
1.96	1.16	0.995	0.48	3.8	0.133	1.43	-0.835	0.693	2.69	5.65	0.413	3.28	4.82	1.63	0.206	1.53	-0.0607
2.38	-1.3	1.64	-0.34	3.09	-0.165	1.24	-0.376	1.63	2.77	6.18	-0.26	3.56	3.73	2.77	1.21	1.57	-0.852
1.7	0.346	2.47	-0.418	2.69	0.545	2.19	0.6	1.86	2.34	5.35	-0.305	3.52	4.19	1.17	0.53	1.34	-0.842
0.857	0.761	3.15	0.655	2.09	0.627	1.25	-0.137	1.21	2.16	4.22	-0.594	4.1	3.78	0.858	0.424	1.28	-0.717
2.45	2.36	0.967	0.428	2.23	0.309	0.797	0.159	1.35	1	4.33	-0.479	2.96	3.65	0.45	0.784	0.912	-0.832
1.56	1.47	2.67	-0.0683	1.48	0.277	-0.839	-1.57	4.03	1.63	3.9	-0.413	4.06	4.27	0.0827	1.66	1.05	-0.727
1.2	1.97	1.19	-0.506	1.11	-0.307	0.971	0.494	4.69	1.59	4.17	-0.653	2.59	2.75	-0.0464	1.12	1.21	-0.767
1.5	2.54	1.31	0.0417	0.305	-0.243	1.97	-0.549	2.12	0.608	3.61	-0.203	3.28	2.79	0.379	2.82	0.966	-1.54
1.1	2.4	0.889	0.382	0.491	0.073	2.95	-0.891	2.89	0.426	4.75	-0.784	2.46	3.67	0.796	1.55	0.839	-1.99
2.15	1.37	2.41	0.426	0.152	-0.3	0.957	-0.533	2.59	1.22	4.41	-0.304	1.72	4.38	0.89	1.3	1.1	-1.26
1.1	1.36	2.9	1.11	0.0754	0.58	2.87	-1.48	1.98	0.764	3.75	-0.408	3.38	3.26	1.06	0.76	1.6	-1.8
3.14	0.431	2.24	0.0408	-0.722	1.28	2.37	0.608	1.75	1.04	2.36	-0.618	2.01	1.62	1.36	1.03	0.935	-1.96
0.121	1.56	1.18	0.649	-0.518	0.792	3.98	-0.34	1.99	1.1	3.2	-0.682	2.49	1.23	-0.761	1.3	1.5	-1.24
1.11	1.24	0.838	0.175	-1.03	0.455	2.89	0.346	1.3	-0.0489	2.97	-0.00494	3.37	1.43	-0.0218	1.04	1.4	-1.34
2.44	0.811	-0.373	0.268	-0.935	-0.203	2.11	0.0476	2.54	-0.161	3.15	0.41	2.82	0.379	1.21	1.49	1.27	-1.32
2.97	-0.722	0.129	0.114	-0.234	-0.279	2.26	-1.19	1.85	0.134	3.18	0.311	3.04	1.05	0.79	2.73	0.935	-1.37
0.696	1.28	1.44	0.0509	0.375	0.00059	0.454	-0.656	0.372	0.833	3.7	0.212	2.63	1.15	0.931	2.74	1.14	-1
0.156	2.02	3.46	0.399	-0.0363	-0.394	1.24	-0.966	2.3	0.996	3.73	-0.0551	1.68	-1.86	1.61	3.66	1.12	-1.25
1.08	0.879	1.66	1.07	-0.482	-0.959	3.06	0.304	2.05	0.26	3.88	-0.0188	2.48	-0.186	0.133	4.48	1.46	-1.32
2.11	1.19	0.049	1.02	-0.287	-0.992	2.33	0.156	2.22	0.782	3.48	0.214	2.77	0.383	1.55	3.43	1.14	-0.752
3	0.0155	1.65	0.881	0.0394	-1.16	1.68	-0.4	0.438	0.692	3.59	0.216	2.13	0.713	1.55	3.05	1.55	-0.569
3.12	0.529	1.06	0.33	-0.312	-0.822	2.28	-0.195	0.896	0.992	1.81	-0.0526	2.07	0.678	2.11	3.48	1.87	-0.799
1.82	1.04	0.142	0.347	-0.193	-0.946	4.53	0.494	0.604	-0.0541	1.4	-0.786	3.29	0.133	1.99	3.3	2.48	-0.805
1.08	-0.018	1.31	0.765	-0.417	-0.457	0.848	-0.29	2.29	-0.375	1.84	-1.33	3.59	-0.326	1.36	3.68	2.53	-0.717
2.31	0.954	1.94	0.375	-0.279	-0.468	-0.0252	-0.397	2.5	-0.446	1.67	-1.68	3.48	1.78	0.811	2.75	2.26	-0.489
0.587	1.06	1.04	0.267	0.625	-0.101	1.88	-0.708	2.81	-0.251	1.84	-1.6	3.86	0.719	2.57	3.1	2.16	-0.68
0.789	2.61	0.365	0.688	0.531	-0.225	2.78	-1.02	1.83	-0.523	1.69	-1.15	3.48	1.4	2.59	3.41	2.27	-0.785
-0.215	2.36	1.21	0.298	0.757	-0.287	2.39	0.274	0.375	-1.66	1.01	-0.437	3.12	0.501	2.56	2.1	2.06	-0.67
0.431	0.708	0.292	0.253	-0.109	-0.341	3.92	0.202	1.06	0.716	0.605	-0.39	3.3	-0.756	2.09	2.17	1.86	-0.621
-0.87	1.07	1.06	0.567	1.31	-0.698	4.71	-0.454	1.13	-0.0247	2.01	0.1	3.75	1.22	2.57	1.66	1.76	-0.611
-0.431	1.83	0.43	0.655	1.86	-1.18	5.07	0.0484	1.26	0.364	1.8	-0.391	3.36	-0.576	3.07	1.68	2.11	-0.398
-1.28	1.61	-0.398	0.318	1.54	-1.05	3.74	-0.185	1.76	0.964	2.9	-1.14	3.42	0.816	2.54	1.72	2.59	-0.37
0.91	0.6	-0.774	0.371	1.62	-0.924	4.03	0.65	1.91	-0.0449	2.32	0.16	2.94	2.55	1.18	0.907	2.29	-0.362
1.64	1.02	0.458	0.708	1.56	-0.665	5.71	-0.518	1.52	1.33	2.22	-0.118	3.07	1.86	0.953	1.1	2.13	-0.948
-0.383	1.44	-0.0955	0.423	1.08	-1.03	4.04	-0.253	1.39	1.36	2.51	-0.0339	2.95	2.26	1	1.02	1.74	-0.982
-0.362	-0.341	0.143	1	0.901	-1.06	3.4	0.788	-0.148	1.01	1.49	-0.644	3.71	0.522	0.888	1.77	1.7	-0.983
-1.16	0.00336	-0.392	0.161	0.0983	-1.4	2.43	0.896	0.284	1.02	0.541	-0.621	2.44	0.171	0.317	1.32	1.51	-0.792
-0.444	0.348	-1.2	0.321	0.139	-0.891	5.61	0.573	1.63	0.154	0.714	-0.759	2.53	0.322	0.0309	1.05	1.65	-1.12
-1.82	-0.00222	-0.559	0.385	0.694	-0.988	6.01	-0.682	1.34	-0.00182	-0.182	-0.959	3.19	-0.819	0.371	2.19	0.786	-0.743
0.217	0.689	1.76	0.655	0.832	-1.13	5.85	-0.277	0.167	0.172	-0.0765	-0.475	2.32	-0.0532	0.00101	1.49	0.949	-1.07
0.28	0.388	0.454	0.359	0.858	-0.0129	4.94	-0.441	0.296	0.758	2.24	-0.263	2.76	1.35	1.97	1.09	0.811	-0.533
-0.221	0.392	0.303	0.155	0.563	-0.0732	5.25	0.00445	1.05	0.407	5.42	-0.286	2.72	-0.363	1.22	1.97	1.02	-1.19
0.634	0.645	0.235	0.484	1.59	-0.181	4.96	0.749	0.65	0.591	6.19	0.0818	3.37	-1.93	0.192	1.96	1.53	-0.993
-1.72	0.596	1.49	0.121	2.53	-0.259	3.88	-0.505	1.62	0.149	5.81	0.412	2.66	-0.923	1.98	2.73	1.08	-1.01
-0.286	-0.681	0.9	-0.0794	1.18	-0.181	5.1	1.03	0.326	0.786	5.28	0.597	2.83	0.658	2.03	3.17	1.18	-0.777
1.71	0.298	0.003	-0.459	1.55	-0.34	6.44	0.841	1.55	0.824	6.11	0.647	1.15	1.23	1.43	2.93	1.22	-0.663
-0.0416	-0.0695	-0.316	-0.492	2.08	-0.35	4.27	0.849	-0.977	1.11	6.42	-0.524	2.68	0.96	2.36	3.06	1.16	-0.866
0.321	1.03	0.355	-0.839	1.11	-0.16	5.23	0.458	0.505	0.398	4.67	-0.548	3.92	2.68	2.19	4.01	0.904	-0.132
1.17	1.25	1.05	-0.475	-0.107	-0.199	6.23	-0.335	1.95	0.319	4.42	-0.195	2.44	2.68	0.77	1.6	0.807	0.384
1.1	0.546	-0.0833	-0.381	0.625	-0.455	4.77	-0.145	-0.489	-0.0566	4.8	-0.117	3.5	0.748	1.65	1.49	0.722	-0.497
0.706	0.275	0.421	-0.127	1.58	-0.953	3.31	0.686	1.42	0.434	5.52	0.566	3.37	1.22	1.07	-0.061	0.581	-0.585
-0.846	0.222	0.974	-0.116	0.735	-0.952	4.73	-0.241	-0.0247	-0.316	5.1	-0.343	3.37	0.585	1.48	3.06	0.939	-0.296
-0.287	1.19	-0.436	-0.38	1.13	-0.626	4.62	-0.224	0.64	-0.172	4.21	-0.249	2.82	-0.216	1.2	1.82	0.575	0.212
0.54	1.88	1.36	-1.44	1.48	-0.498	4.84	0.111	1.4	-0.295	3.2	-0.941	3.55	-0.959	1.38	2.78	0.502	-0.63
-1.11	1.59	-0.606	-0.0309	2.65	-0.23	4.93	-0.464	1.62	-0.313	3.37	-1.17	2.25	1.27	1.14	2.02	-0.0909	0.115
-0.317	2.54	-1.6	-0.182	2.82	-0.241	4.78	0.453	0.935	-0.452	2.75	-1.32	3.75	-0.275	1.57	2.8	-0.0144	0.615
-0.0384	2.34	-0.515	0.212	1.8	-0.278	4.71	0.367	0.869	-0.502	1.89	-0.447	3.64	-0.265	0.00716	3.65	-0.23	0.406
-0.862	0.684	0.198	0.0985	2.25	-0.311	4.48	-0.876	-0.00787	-0.835	1.65	-0.246	3.28	-0.648	1.45	3.47	-0.436	0.186
0.469	1.08	1.01	0.676	2.25	-0.184	2.87	0.303	0.59	-0.6	2.18	-0.885	3.92	1.28	2.03	2.11	0.261	0.195
1.32	1.26	0.766	0.219	0.922	-0.00228	4.95	0.856	1.31	-0.881	2.72	-0.323	4.02	1.68	0.268	1.2	0.0931	0.166
0.0201	0.686	0.415	-0.0286	1.49	-0.415	2.97	2.25	1.81	-0.423	4.57	-0.663	3.39	3.69	0.115	1.5	0.34	-0.321
1.12	1.93	-0.365	0.739	-0.0176	-0.357	2.17	1.61	0.397	-0.501	4.08	-1	3.87	3.1	-0.146	1.76	0.11	-0.682
-0.195	1.93	-0.397	0.287	0.365	-0.611	3.65	0.706	0.293	0.425	3.09	-1.08	4.77	2.13	0.927	2.56	0.147	0.316
0.737	2.03	-0.852	0.782	0.408	-0.9	2.91	1.01	1.05	0.482	3.06	-1.02	3.35	2.87	-0.205	1.39	-0.16	-0.507
0.161	0.436	-0.635	0.697	0.000836	-0.382	5.23	1.99	-0.56	0.0259	2.88	-1.15	2.53	3.6	0.823	0.616	-0.311	-1.15
0.746	-1.45	-0.814	0.592	-1.24	-0.108	2.97	1.66	0.635	0.461	2.75	-1.08	3.82	3.3	0.584	0.36	-0.18	-1.2
0.983	0.339	-0.701	0.807	-0.98	-0.815	3.15	0.843	-1.67	1.26	2.7	-1.25	3.24	2.09	0.518	0.983	-0.243	-1.06
0.974	1.71	0.107	0.591	-0.108	-1.4	4.44	1.55	0.0488	0.0791	1.71	-1.53	3.39	2.62	-0.0739	0.347	-0.414	-1.2
1.9	-0.431	-0.125	0.361	-1.02	-1.45	4.63	1.31	-1.84	1.27	0.611	-1.25	1.7	4.47	1.41	0.898	-0.433	-1.15
0.482	-0.296	-0.63	-0.0579	-0.247	-0.645	3.75	1.68	0.0976	-0.436	0.322	0.0201	3.1	3.35	1.93	0.739	-0.606	-1.47
-1.53	1.16	1.4	0.546	-0.933	-0.16	4.27	0.357	-0.308	-0.22	-0.0427	0.786	2.42	3.75	1.38	0.935	-0.319	-1.62
-0.569	0.67	-1.3	0.637	-0.426	-0.257	2.81	2.23	0.759	0.177	0.889	0.375	2.36	2.13	1.83	0.406	-0.251	-1.81
0.146	1.29	-0.228	-0.384	-1.55	-0.42	4.07	2.5	0.112	0.555	0.304	-0.266	3.3	3.54	0.943	-0.252	-0.533	-0.964
2.32	-0.759	-1.23	-0.0774	-2.43	2.12	3.17	1.43	-0.0443	0.274	0.817	0.0361	2.84	1.24	2.01	0.434	-0.379	-0.199
1.05	-0.798	-0.672	-0.0719	-2.18	2.26	4.02	1.69	-0.2	1.03	0.563	0.474	2.8	2.23	0.858	0.849	-0.00112	-0.798
1.36	0.528	2.33	0.37	-1.1	1.67	2.02	0.951	-1.21	0.0719	1.48	-0.365	2.68	3.63	1.76	0.967	-0.382	0.907
1.33	0.596	-0.68	-0.0754	-0.312	2.59	3.59	1.66	0.354	-0.462	2	-0.615	1.89	2.21	0.987	0.148	0.0483	0.406
1.26	1.47	0.364	-0.458	-0.437	2.74	1.64	2.78	-0.108	0.117	2.4	-0.597	3.12	3.85	0.0157	-0.334	-0.602	1.79
0.487	0.809	-0.725	-0.0522	-0.595	2.56	4.54	2.69	0.0877	0.132	2.52	-0.488	3.02	3.99	1.52	-0.843	-0.642	1.28
0.747	1.99	0.487	0.49	-0.716	2.99	4.5	1	-1.93	0.0861	2.91	-0.635	2.36	4.18	0.874	0.511	-0.75	1.21
2.9	0.956	-0.632	0.603	-0.524	3.32	2.23	0.251	-0.622	-0.972	2.72	-0.406	2.7	2.01	1.2	-0.353	-1.17	-0.109
3.81	1.08	0.21	0.48	0.24	3.31	4.15	-0.327	0.224	-0.456	1.44	-0.0425	3.85	3.44	2.91	0.337	-1.45	0.278
1.9	0.534	-0.526	0.186	-0.287	3.18	2.78	0.489	1.05	-0.897	0.906	-0.0498	3.14	2.97	1.99	0.981	-1.53	0.607
2.22	1.26	0.0744	0.799	0.0679	2.24	2.37	0.825	-0.99	-0.655	0.376	0.181	3.31	1.8	2.41	1.72	-1.24	0.962
2.12	1.47	-0.928	0.467	0.873	1.75	4.08	1.17	0.0478	-0.562	0.266	-0.443	3.83	3.41	1.83	1.49	-0.952	0.651
2.83	1.1	1.76	-0.0166	0.885	1.18	4.13	1.93	0.617	-1.13	0.19	0.192	3.53	3.07	0.807	1.6	-0.734	0.55
3.67	0.0193	1.29	0.168	-0.019	0.533	2.11	1.11	0.855	-1.05	0.259	0.304	2.73	4.05	2.53	1.51	-1.1	0.937
3.16	1.56	-0.582	-0.475	1.07	0.27	2.96	1.44	0.355	-0.389	0.0934	0.284	2.45	3.64	1.09	1.17	-1.68	0.78
3.34	1.53	1.4	-0.291	1.66	0.473	4.73	1.03	-1.98	-0.232	-0.506	-0.47	3.41	5.01	1.49	1.13	-1.08	1.18
1.89	2.18	-0.784	-1.09	1.13	0.709	3.91	0.747	-0.713	0.499	-0.67	-0.166	3.72	6.11	0.758	0.234	-0.837	0.952
3.37	1.76	-0.574	0.00134	1.74	0.435	2.85	1.83	0.82	1.07	-0.421	0.503	2.61	4.92	1.35	0.784	-0.201	1.01
3.08	1.16	0.637	-0.686	2.27	0.534	3.53	2.08	-0.836	1.58	0.405	0.563	3.53	3.46	2.3	0.673	-0.334	0.503
2.35	-0.596	0.0912	-0.275	2.56	0.288	2.05	1.28	-0.694	2.55	1.78	0.509	3.35	4.52	0.684	0.224	-0.517	0.354
2.74	-1.56	0.968	-0.387	0.6	0.284	1.92	2.47	0.117	1.38	2.1	0.195	4.05	5.69	1.4	0.409	-0.686	-0.413
2.92	-1.23	0.832	0.391	1.15	0.0987	3.25	0.376	-0.232	2.07	1.73	-0.514	3.76	5.67	1.82	-0.299	-0.172	-0.304
3.36	-0.519	1.79	1.12	-0.578	-0.0405	3.38	2.08	-0.117	1.22	2.84	-0.512	3.4	5.16	2.23	-0.69	-0.0115	-0.33
3.16	-2.38	0.473	1.57	0.933	0.221	3.14	2.2	0.419	1.66	3.48	-0.622	3.84	4.53	0.348	-0.23	-0.37	-0.408
2.27	-0.834	0.544	1.28	0.894	-0.0347	2.27	2.38	0.654	1.22	4.07	-0.883	3.06	6.4	1.34	-0.644	-0.0554	-0.791
2.93	0.665	-0.475	1.47	0.0901	-0.0552	2.76	2.08	-1.14	2.84	4.11	-0.759	2.49	3.47	2.16	-0.586	0.185	-1.23
2.45	1.49	-0.572	0.979	-0.244	0.244	3.1	0.977	-0.326	2.68	3.71	-0.592	2.49	5.09	0.0831	0.522	0.5	-1.65
2.79	0.606	0.0398	0.993	-0.122	0.14	3.31	1.29	0.887	3.11	3.56	-0.124	3.14	6	1.89	-0.404	0.013	-2.08
1.91	0.418	0.512	0.853	-0.525	-0.369	3.58	1.04	-2.16	2.45	3.61	0.225	3.48	5.74	1.86	-0.1	0.243	-1.83
0.786	-1.47	-0.582	0.558	0.507	-0.312	2.24	0.122	0.631	2.85	3.51	0.681	4.12	6.68	2.1	-0.305	0.475	-1.7
1.35	-0.671	-0.974	-0.0141	-1.47	-0.332	3.56	0.557	1.39	1.64	3.48	-0.268	4.03	5.83	2.36	-0.419	1.25	-1.73
2.66	0.703	2.08	0.351	-1.23	-0.0541	1.64	1.84	0.783	0.945	3.29	-1.04	4.57	5.11	1.69	-0.332	0.878	-1.56
3.14	-0.761	-0.0896	0.508	-0.688	0.263	2.61	2.35	-0.363	0.519	4.7	-0.873	3.18	5.58	0.248	-0.887	0.97	-1.04
3.07	-2.59	-0.0947	0.679	-0.688	1.92	3.66	1.67	0.421	0.436	5.68	-0.305	3.46	6.2	0.888	-0.44	1.51	-0.884
1.08	-2.02	-1.67	0.931	-1.48	2.08	2.63	-0.627	0.522	0.675	5.71	-0.312	3.31	4.27	0.342	-1	1.39	-0.972
-0.706	0.269	-0.0223	1.23	-1.36	1.68	1.99	0.123	-0.0541	1.23	5.23	-0.273	4.89	8.19	0.4	0.927	1.61	-1.14
2.37	-0.0565	-1.94	0.499	-1.41	1.15	4.17	2.06	-1.68	0.794	5.4	-0.229	4.01	4.61	1.66	-0.386	1.09	-1.38
1.91	0.802	-1.61	0.105	-2.31	0.758	3.23	1.99	0.434	1.03	4.78	-0.295	4.43	4.58	1.82	-0.37	1.19	-1.31
3.92	0.0628	-2.18	0.77	-1.13	0.24	3.16	2.47	-0.35	1.23	4.56	-1.45	3.65	7.05	1.99	0.414	0.989	-1.07
1.79	-0.0502	1.53	0.142	-2.13	0.206	3.5	1.11	-1.13	1.6	3.85	-1.5	5.4	4.67	0.656	-0.664	1.47	-1.13
0.298	1.5	-0.627	0.37	-1.32	0.377	1.86	1.16	0.861	1.58	3.42	-1.1	4.29	5.76	2.03	-0.826	1.52	-1.46
-1.02	-0.82	-0.403	-0.363	-1.8	1.84	0.52	0.208	0.96	1.36	4	0.00104	4.49	7.71	1.37	-0.109	0.684	-0.773
1.5	0.902	0.177	-0.0483	-1.08	2.79	2.73	-0.529	-1.02	1.29	4.06	0.355	3.16	5.58	1.29	1.01	0.342	-0.0649
2.11	0.709	-0.0712	0.398	-1.9	2.73	2.2	0.822	0.0832	0.82	3.46	0.824	4.11	6.84	1.62	-0.212	0.511	0.235
1.2	0.306	1.29	0.0537	-0.93	2.24	2.78	-0.121	-0.632	-0.21	3.24	0.898	3.94	5.15	2.35	-1.99	1.46	0.77
0.199	0.17	0.212	-0.73	-0.0283	1.48	2.88	-0.039	-0.968	0.0449	2.69	0.0707	4.6	7.95	1.77	-1.13	1.04	0.0438
0.643	0.162	0.348	-0.298	-0.755	1.05	3.11	0.228	-1.23	0.914	2.57	-0.893	4.79	5.26	0.573	-1.59	1.24	1.24
1.12	-0.365	0.587	-0.0443	-0.742	0.958	1.69	0.908	-1.66	0.631	2.51	-0.831	4.7	4.16	0.859	-0.643	1.13	0.506
1.55	1.04	-0.545	0.169	0.0395	0.969	1.02	1.59	0.323	1.05	2.34	-1.35	4.57	5.86	0.534	-0.283	1.23	0.58
1.92	0.0609	0.229	0.0847	-0.487	0.913	1.1	0.122	0.166	1.04	1.1	-1.8	4.63	5.59	1.03	-0.966	0.651	0.345
-1.08	0.815	0.298	-0.106	-0.409	1.69	2.34	0.45	-0.393	-0.0965	1.18	-1.71	5.27	6.17	1.13	0.675	0.692	-0.0318
-0.23	0.388	-0.0203	-0.728	0.19	1.61	0.946	-0.593	-0.721	0.275	-0.0799	-2.34	4.42	5.68	0.866	0.0242	0.657	-0.411
0.175	-0.00462	-0.56	0.035	0.623	0.935	-0.212	0.127	-1.9	0.464	0.218	-1.62	4.73	5.46	0.289	-0.118	0.787	0.163
-0.00276	0.138	0.347	-0.507	0.851	0.419	4.01	0.461	-0.385	-0.357	0.332	-0.753	4.22	5.26	1.13	-1.41	1.05	0.55
1.23	-1.02	-0.614	-0.473	0.503	0.43	4.41	-0.674	-2.54	0.401	1.15	-0.564	3.55	5.38	1.68	-1.81	0.385	0.73
0.959	-0.428	0.266	-0.988	0.417	0.357	3.44	0.128	0.0367	0.542	1.02	0.178	4.1	6	0.177	-1.45	0.295	0.392
0.62	0.354	0.682	-0.233	0.397	0.464	2.69	-0.702	-0.0931	0.746	1.61	-0.212	3.37	6.17	1.19	-1.81	0.219	0.197
0.0703	0.557	0.127	-0.524	-0.0191	0.452	3.37	0.289	-0.0748	0.789	2	-1.28	3.73	5.85	1.83	-1.22	-0.0258	0.0517
1.3	1.01	-0.464	-0.864	-0.613	1.03	1.14	-0.151	1.5	0.604	1.22	-1.94	4.15	4.49	0.903	-1.42	-0.0655	0.0794
0.986	-0.843	0.0251	-1.17	-0.455	1.55	0.422	0.38	-0.139	-0.0762	0.794	-2.17	3.55	6.91	-0.225	-1.54	-0.299	-0.0828
1.07	-1.18	0.00358	-1.26	-0.833	1.63	1.72	0.708	-0.113	-0.828	-0.0185	-1.5	3.72	5.81	0.457	-1.42	-0.322	-0.303
0.0255	-0.258	1.9	-0.451	-0.434	1.09	1.31	-0.309	-0.636	0.636	-0.731	-1.63	3.48	6.9	0.285	-0.962	-0.332	-0.317
0.863	0.168	-0.296	-0.908	-1.16	0.831	4.01	0.155	-0.266	0.968	-0.875	-2.13	4.1	7.25	0.408	-1.32	-0.321	-0.123
0.287	0.039	1.52	-0.24	-1.44	0.677	2.09	-0.584	0.901	0.204	-1.14	-2.33	2.88	6.83	-0.121	-0.827	-0.435	-0.0207
1.91	0.55	0.362	0.149	-1.01	0.42	2.72	0.57	-0.31	1.19	-1.44	-2.2	3.88	7.48	0.854	-0.773	0.562	-0.439
3	1.58	1.12	-0.29	-1.26	0.192	2.88	0.202	0.167	2.24	-1.54	-1.59	3.79	6.83	1.3	-0.773	-0.177	-0.5
1.15	1.28	2.31	-0.134	-0.718	0.236	1.13	0.19	0.705	1.06	-1.4	-1.85	4.62	5.56	1.14	-0.719	0.595	-1.08
1.62	-1.29	2.66	0.296	-1.27	0.11	1.1	-0.615	0.959	1.27	-0.679	-2.18	2.97	4.48	0.47	-0.773	0.197	-0.614
-0.295	-1.5	1.48	0.137	-0.742	-0.218	2.84	-0.559	-0.318	1.39	-0.598	-2.21	4.14	6	1.31	-1.3	-0.42	0.223
-0.483	-1.07	0.56	0.00257	-1.1	0.405	3.79	-1.08	-0.901	1.78	-0.974	-2.15	4.28	6.07	1.65	-0.867	-0.317	0.0132
-0.897	-0.867	1.8	0.121	-1.2	1.01	2.75	-0.521	-0.046	1.69	-1.79	-0.954	2.97	5.55	2.44	-0.146	0.419	0.371
0.338	0.524	1.16	0.915	-1.44	1.58	2.55	-0.0397	1.19	1.34	-1.73	-0.53	3.85	5.75	1.16	0.193	0.77	0.424
1.72	0.0356	-0.585	0.165	-1.12	1.35	3.66	-0.13	1.23	0.894	-1.26	0.114	3.71	5.8	-0.257	-0.681	0.864	0.0809
1.45	-0.522	-0.169	0.934	-0.998	1.29	0.673	0.39	1	1.28	-0.827	0.442	3.84	6.18	1.09	-1.14	0.903	-0.329
-0.279	0.282	0.0864	-0.77	-0.853	0.8	1.82	1.9	0.378	-0.319	-0.8	1.03	2.61	5.04	-0.201	-1.08	1	0.228
0.768	0.617	-1.85	0.157	-0.404	0.923	3.24	0.453	0.696	0.165	-0.959	0.261	3.95	6.06	0.933	-0.174	0.61	0.209
1.63	0.73	-0.338	0.284	-1.32	0.591	2.73	0.721	-0.733	0.597	-0.727	-0.0928	3.1	6.39	1.29	0.261	-0.111	0.374
0.0777	-0.226	-0.389	0.273	-0.417	0.179	1.23	0.2	-2.16	1.13	-1.21	-0.707	2.46	4.61	1.04	-0.0511	0.115	-0.295
0.972	-0.939	-0.307	0.0765	-1.36	-0.065	2.48	0.354	-0.807	0.747	-1.69	-0.407	3.06	7.47	0.881	-0.224	0.843	-0.717
0.525	-0.111	0.796	-0.0571	-0.502	-0.0932	2.3	1.01	1.54	0.632	-1.62	-0.214	3.2	7.14	0.478	-1.61	0.744	-0.315
2.22	-0.104	-2.59	0.573	-1.28	0.677	2.78	1.32	1.06	2.17	-1.42	-0.23	3.99	6.68	0.787	-0.292	0.0159	-0.467
0.146	-0.93	-0.222	0.198	-1.09	0.727	3.74	1.27	-0.596	1.33	-1.58	-0.285	2.96	5.09	0.433	-0.248	-0.243	-0.804
0.00823	-2.21	0.246	-0.0673	-0.792	0.517	1.89	0.0267	-1.31	1.94	-0.751	-0.561	2.86	7.08	0.171	0.326	-0.492	-1.17
0.747	-0.409	0.7	0.0806	-0.0713	0.287	2.59	0.436	-1.05	1.96	-1.48	-1.19	3.42	7.54	0.375	1.48	-0.385	-1.27
0.0616	-2.14	-0.251	0.666	1.44	-0.286	1.54	0.24	-1.08	1.71	-1.85	-1.73	2.13	6.89	1.36	0.759	-0.221	-0.756
1.37	0.0096	0.831	-0.233	1.64	-0.747	0.406	0.991	-0.415	0.706	-1.53	-1.47	2.11	6.4	1.36	2.19	0.213	-1.01
1.1	-1.14	0.659	-0.546	2.12	-0.658	2.71	0.018	-0.286	0.607	-1.25	-0.244	2.43	4.91	0.126	1.7	0.346	-1.05
0.635	-0.565	0.922	-0.327	2.01	-0.199	2.35	0.456	1.39	0.485	-1.78	0.114	2.1	7.41	0.0733	1.7	-0.0106	-1.21
1	0.291	0.728	-0.477	1.51	0.368	1.4	0.764	0.485	-0.749	-1.51	0.264	3.64	6.64	1.15	2.5	-0.104	-0.489
0.71	0.251	1.72	-0.447	2.1	0.786	2.63	1.55	0.447	-0.472	-1.81	-0.172	2.67	6.82	0.127	2.5	-0.476	-0.967
0.808	-0.444	1.01	-0.291	1.63	0.692	-0.193	1.2	0.697	-0.475	-2.18	-0.132	2.45	5.83	0.738	2.77	-0.743	-0.835
0.367	-1.5	-0.0755	-1.02	1.97	0.762	0.473	2.03	-0.843	0.0269	-2.53	-0.624	3.8	9.01	1.25	1.26	-0.647	-0.72
1.77	-0.1	0.027	-0.568	1.66	0.535	0.914	0.824	-1.48	0.29	-2.12	-0.939	3.38	7	1.2	1.87	-0.342	-0.535
1.86	1.19	-0.00203	-0.0289	1.5	0.808	0.00824	1.23	-1.54	0.162	-1.95	-0.831	2.96	6.17	0.578	1.06	-0.419	-0.617
2.05	-1.74	1.02	0.346	2.01	0.454	0.924	1.89	-1.75	0.757	-2.07	-0.435	3.32	6.02	1.02	0.614	-0.0595	-0.531
0.892	-1.12	0.708	0.457	1.22	1.09	3.55	1.87	-1.75	1.23	-2.59	-0.864	3.15	8.29	0.905	0.0437	0.377	-0.636
0.385	-0.499	1.92	0.0357	0.988	1.45	3.53	1.67	-0.426	1.36	-2.73	-1.2	2.98	6.69	0.837	-0.509	0.368	-1.14
0.548	0.635	-1.54	0.497	2.46	2.22	3.07	1.43	2.76	0.362	-3.53	-0.534	2.42	6.48	-0.277	0.456	0.415	-0.927
2.71	-0.608	-1.39	0.407	1.75	2.39	3.81	1.99	1.49	0.809	-2.83	-0.352	3.05	7.17	1.01	0.341	-0.194	-0.015
1.56	0.842	0.606	0.91	0.924	2.77	1.82	2.3	-0.00256	0.456	-2.96	-0.73	1.7	7.04	1.84	0.779	0.111	-0.348
1.19	0.113	0.071	0.278	1.49	2.49	2.86	2.14	1.11	0.193	-2.76	-0.166	2.36	6.73	1.58	0.0877	0.193	-0.328
1.37	-0.955	0.484	-0.0249	0.863	1.86	1.4	2.45	-0.58	1.19	-3	-0.0472	2.25	7.9	-0.132	-0.372	0.426	-0.22
1.25	-2.39	-1.8	-0.247	0.517	1.65	1.09	1.95	-0.672	-0.639	-2.61	0.415	2.09	7.32	0.629	0.257	1.22	-0.338
2.66	-0.363	-1.24	0.812	0.0592	1.25	3.89	0.519	0.305	-0.239	-3.33	0.982	2.72	6.39	-0.616	-0.411	1.03	-0.502
0.441	0.0386	-1.32	1.58	-0.955	0.866	1.66	1.87	0.41	-0.579	-3.11	0.36	2.57	6.84	0.534	0.693	0.735	-0.569
0.224	0.233	0.589	1.12	-0.0865	0.716	2.03	1.16	-1.98	-0.229	-2.73	-0.276	3.32	8.99	0.611	-0.88	0.325	-0.577
0.412	-0.355	-2.35	1.74	-0.697	0.953	2.33	1.67	-0.315	0.157	-2.82	0.00493	2.12	8.22	0.288	-0.0683	0.482	-0.682
1.12	-0.408	-0.0408	2.08	-0.192	0.968	1.94	1.05	-1.04	0.226	-2.33	0.0901	3.77	8.12	-1.43	0.232	1.18	-0.404
1.65	-0.592	-0.307	0.577	-0.77	0.624	1.27	0.649	0.00898	1.9	-1.62	-0.166	2.24	7.94	-0.135	0.878	0.802	-0.791
1.63	0.126	0.121	0.864	-0.802	1.31	2.12	1.01	-0.274	1.66	-1.21	-0.14	2.5	6.13	-0.489	0.563	1.03	-0.626
2.41	-0.397	-1.14	1.18	-0.681	0.848	0.66	1.77	0.526	2.28	-1.29	-0.273	2.33	5.13	-0.901	0.325	-0.115	-0.551
1.62	0.467	-0.339	1.65	-0.929	0.512	3.29	1.72	-1.9	1.21	-1.94	-0.571	3.13	6.76	-0.198	-0.229	0.136	-1.01
-1.2	0.278	-0.201	1.03	-0.357	0.229	1.7	2.37	-0.855	0.917	-1.16	-0.647	2.91	6	2.14	0.85	0.713	-0.803
-0.221	0.386	-0.684	0.825	0.202	-0.222	1.71	0.302	-0.75	0.75	-1.12	-1.43	1.84	5.37	0.53	1.02	1.76	-0.512
0.718	-0.0112	-0.0449	0.791	0.486	-0.48	1.16	0.388	0.621	0.629	-1.76	-1.99	3.1	5.65	1.94	0.167	2.26	0.112
0.0583	0.162	0.832	0.389	0.918	0.435	1.08	1.18	-0.0916	1.03	-1.7	-1.5	3.17	4.53	1.2	-0.24	1.83	0.34
1.67	0.492	-0.00182	0.701	0.024	0.752	1.82	1.08	-0.333	1.19	-2.63	-1.53	2.16	5.59	1.5	-0.525	0.361	-0.0153
1.4	0.432	-1.86	0.574	0.0879	0.844	-0.247	-0.552	-1.07	1.38	-2.38	-1.42	2.66	5.33	-1.54	0.131	0.25	0.259
0.416	0.654	-0.902	1.76	-0.928	0.941	2.88	0.197	0.326	-0.0822	-2.13	-0.705	1.47	6.31	-1.44	-0.849	0.331	0.18
-1.17	1.67	-1.06	0.944	-0.92	0.788	2.39	0.655	-1.68	-0.243	-2.35	-0.448	2.03	6.23	-0.741	0.727	0.744	-0.131
-1.4	-0.268	-0.872	0.676	-0.531	0.829	1.5	0.438	-0.94	0.833	-2.49	-0.447	1.99	7.47	-0.0517	0.0155	0.852	-0.279
-1.04	0.0606	-0.809	1.58	-0.0204	0.678	0.123	0.295	-1.17	0.539	-2.38	-0.397	2.18	6.68	0.693	0.0126	1.07	-0.34
-0.148	-0.174	0.0121	1.47	-0.818	0.154	1.46	-0.312	-0.444	0.622	-3	0.0449	2.01	7.91	0.446	0.563	1.48	-0.467
0.278	0.408	-1.63	1.26	-1.17	0.171	1.75	0.348	-1.35	0.101	-3.12	0.913	2.87	6.1	0.449	0.332	1.4	-0.0776
1.09	-0.538	-0.851	1.31	-1.41	-0.219	1.47	1.03	0.788	0.203	-3.28	1.36	3.24	4.84	-1.24	0.271	0.905	-0.4
0.734	1.58	-2.47	1.33	-0.319	-0.146	-0.42	0.689	0.637	1.62	-3.42	1.5	1.66	4.16	0.698	0.584	0.727	-0.417
0.439	-0.0871	-1.7	0.669	-1.92	0.335	0.899	0.8	-0.625	1.4	-2.9	2.1	3.08	5.24	0.834	0.73	0.158	-1.17
-1.09	0.659	-0.301	0.892	1.52	0.174	1.01	1.66	-2.28	1.28	-2.88	1.36	2.84	6.09	-0.684	1.08	0.856	-1.03
-0.478	-0.176	-1.32	0.399	1.92	-0.254	-1.08	2.17	0.0306	0.657	-2.95	0.391	2.48	6.6	-0.178	1.08	1.17	-0.729
0.755	1.16	-1.02	0.579	1.64	-0.331	1.11	0.896	0.288	0.676	-3.42	0.306	2.49	7.24	0.244	0.626	1.06	-0.844
1.4	0.589	-0.628	0.141	0.948	-0.371	0.095	1.26	-0.531	0.37	-3.12	0.258	2.38	6.96	-0.844	0.515	1.28	-0.0929
1.82	2.15	0.929	0.306	0.722	-0.198	0.47	0.0754	-0.815	-0.653	-2.86	0.207	1.45	5.25	0.604	1.44	0.844	-0.141
1.66	-0.556	-0.181	0.287	1.34	0.0694	1.32	0.514	0.44	-0.776	-2.01	-0.201	2.34	5.23	0.219	1.08	1.45	-0.231
1.5	0.482	-1.68	0.48	2.27	0.563	0.383	1.21	-0.68	-0.397	-2.1	-0.228	2.52	7.56	-0.833	-0.0321	1.13	0.154
1.48	-0.832	-0.101	0.381	1.41	0.319	0.171	-0.000965	-0.796	-0.565	-1.15	0.364	3.68	7.67	-1.75	0.868	1.29	-0.386
2.53	-1.03	0.736	0.103	1.42	-0.169	1.07	1.05	-1.25	-0.125	-0.394	0.852	2.25	7.81	-0.512	-0.113	1.24	-0.212
1.88	0.506	-0.255	0.599	1.42	-0.704	0.0664	0.77	-2.04	-1.04	-0.595	0.994	2.28	6.03	-0.808	-0.164	0.736	-0.264
0.658	0.187	-0.814	0.647	1.14	-1.23	0.22	1.64	-2.79	0.592	-0.249	2.34	3.18	5.23	0.392	-0.674	0.871	-0.909
0.957	-0.125	-1.29	0.208	1.52	-1.53	0.674	0.432	-1.8	0.331	-1.02	2.29	3.71	5.97	0.0232	-0.424	0.235	-0.717
0.98	-0.889	-1.85	0.326	1.73	-1.12	-0.0339	0.0699	-0.205	0.41	-1.03	1.43	3.75	5.72	-0.756	0.918	0.304	-0.925
-0.509	-1.15	-1.05	0.315	1.45	-0.504	1.21	0.749	-0.891	0.309	-0.381	1.2	4.68	7.28	0.315	0.223	-0.123	-1.13
1.52	-2.05	-1.65	-0.118	1.35	-0.868	0.265	1.87	0.0195	0.615	-1.39	1.17	3.55	5.86	0.343	0.246	-0.665	-0.997
0.736	-0.235	-0.689	0.474	0.867	-1.34	0.814	-0.0856	-1.44	0.898	-1.53	1.04	3.42	6.23	0.157	0.297	-0.0813	-1.27
-0.335	0.0472	-0.438	-0.478	0.265	-1.1	2.76	0.563	-1.92	2.2	-1.53	0.686	3.14	5.95	1.94	-0.183	0.0489	-1.16
0.641	0.447	-2.35	-0.516	0.339	-0.391	0.902	0.00586	-0.823	1.87	-1.59	0.522	4.56	6.11	0.587	-0.0758	-0.15	-1.01
1.31	-0.67	-0.364	0.19	0.178	-0.299	0.544	-0.391	-1.09	0.753	-1.76	1.29	4.04	6.91	1.46	-0.297	-0.25	-0.934
1.5	-1.61	-0.814	-0.0679	0.181	-0.576	0.534	0.629	0.604	0.108	-1.88	1.44	3.23	4.01	0.739	0.774	-0.167	-0.437
0.469	0.26	-1.62	0.253	-0.0091	-0.62	2.29	0.797	-1.12	-0.16	-1.4	1.48	3.11	4.72	0.31	0.422	-0.436	0.589
0.92	-0.988	-0.308	-0.191	-0.0734	-1.17	2.21	1.77	-2.35	0.464	-1.35	1.2	1.85	7.32	-0.0518	0.199	-0.243	0.338
2.27	-1.03	1.12	-0.662	0.368	-1.01	2.19	1.97	-0.901	0.988	-1.5	1.65	0.473	5.69	1.67	-0.308	-0.483	-0.368
2.41	-0.986	0.772	-0.2	0.923	0.0347	1.6	1.14	-0.38	0.868	-0.261	1.81	1.52	3.54	0.751	0.54	-0.495	-0.441
1.34	-0.813	-0.836	-0.287	1.33	0.333	0.355	1	0.408	0.0751	-0.222	2.03	1.69	4.43	1.12	0.0888	-0.681	-1.11
-0.471	0.325	-0.622	0.856	2.09	0.31	1.3	1.17	0.0883	-1.25	-0.477	1.89	1.9	6.49	1.59	1.1	-0.853	-1.77
1.04	0.146	0.886	0.371	1.37	0.356	0.472	1.79	-1.39	-0.309	0.152	1.68	1.09	4.38	1.78	0.786	-0.531	-1.46
0.243	-0.0147	-0.934	0.696	0.446	0.453	2.1	1.41	-0.723	0.0839	0.798	2.25	1.6	5.54	2.86	0.665	-0.743	-1.13
0.551	-0.631	-2.12	0.452	1.29	0.338	1.12	0.0834	-0.516	-0.523	1.23	1.94	0.558	5.87	1.57	0.388	-1.09	-0.758
1.2	-0.0546	-1.15	-0.056	-0.0954	0.223	0.472	1.59	-0.325	-0.91	2.46	2.21	0.294	4.83	2.04	1.21	-0.693	-0.583
0.00127	1.06	-1.24	-0.348	-0.521	0.563	0.143	0.539	-0.196	-0.031	3.13	2.49	2.11	4.55	0.932	0.327	-1.25	-0.214
-1.08	0.277	-1.96	-0.681	-0.4	0.456	0.341	0.758	0.13	1.47	2.53	1.51	2.13	5	2.13	0.355	-1.04	0.34
0.239	1.71	-2.44	-1.12	0.00841	-0.117	0.399	-1.06	0.189	1.89	2.48	0.947	2.16	3.99	1.74	0.672	-1.14	0.422
0.515	0.18	-2.99	-0.928	-0.107	-0.192	-1.95	-0.321	0.627	1.37	1.69	0.576	2.46	5.31	2.69	-0.123	-1.26	0.0027
1.4	-0.027	-1.49	-1.05	0.0259	-0.317	0.714	0.533	0.791	1.99	1.18	0.825	1.67	4.26	1.58	-0.253	-0.643	-0.0205
0.238	-0.441	0.669	-1.45	0.876	-0.279	0.416	1.21	0.789	0.254	1.13	0.44	2.1	3.79	1.14	0.182	-0.901	0.423
-0.835	0.231	-0.248	-1.07	1	-0.405	1.23	1.3	0.472	0.359	0.746	-0.0477	1.28	4.27	2.03	-0.818	-0.689	0.299
1.47	-0.695	-0.482	-1.72	0.462	0.542	1.16	0.4	-2.3	0.485	2.31	0.0951	2.3	4.89	2.97	0.537	-0.576	0.522
-0.639	-0.359	1.05	-0.916	-0.0536	0.605	0.455	-0.108	-0.745	0.712	2.26	0.462	1.55	5.81	1.55	0.383	-0.385	0.982
1.18	-1.09	-0.533	-0.811	0.624	0.677	1.84	-0.17	0.11	0.797	2.29	0.693	1.74	6.26	0.669	-0.014	-0.88	0.606
0.614	0.399	-1.01	-0.243	1.16	0.99	-0.566	-0.168	0.719	1	2.83	0.352	2.32	4.02	1.85	0.152	-1.39	-0.284
0.898	0.71	-2.07	-0.375	1.23	0.785	0.977	-0.439	0.546	0.721	2.65	-0.635	2.17	2.52	2.7	0.252	-1.08	-0.17
2.4	-0.236	-2.4	-1.05	1.35	0.694	-0.0517	0.466	-1.29	1.07	2.41	-0.802	2.3	5.18	1.63	0.57	-1.52	-0.585
0.405	-1.39	-1.19	-1.55	0.659	1.22	-0.26	-0.453	-0.175	-0.149	2.7	-0.295	0.918	5.1	2.17	0.806	-1.56	-0.471
-0.255	-0.393	-1.44	-1.39	0.965	0.883	0.85	0.508	-1.17	-0.00359	3.18	0.0736	2.05	6.68	1.36	1.66	-1.56	-0.269
0.978	-1	0.366	-0.972	1.53	1.17	-0.438	0.0816	-0.58	-0.482	2.43	-0.0463	1.92	6.96	-0.385	0.989	-1.68	-0.0443
1.04	-0.654	-0.556	0.0186	0.482	0.488	0.963	0.517	-0.817	0.226	1.73	-0.526	2.06	7.11	-0.245	0.891	-2.11	-0.348
1.46	-1.37	-1.47	-0.507	1.1	0.197	2.04	1.23	-0.099	0.329	1.31	-0.326	2.9	7.33	0.0129	0.816	-1.72	-0.341
-0.118	-1.93	-3.55	0.06	1.57	0.0747	1.07	0.0306	-0.993	-0.00452	0.933	-0.432	2.5	6.66	1.04	1.1	-1.51	-0.637
0.0402	-0.502	-1.93	-0.711	1.32	-0.27	1.68	-0.373	-1.91	-0.123	1.08	-0.35	2	5.66	0.983	0.962	-1.1	-0.359
2.03	-0.854	-0.659	0.0907	0.0123	-0.688	1.27	-0.338	-2.87	0.0118	1.6	-1.09	2.47	5.16	2.75	0.985	-1.15	-0.269
0.495	-0.0465	0.775	-0.12	-0.427	-0.228	0.925	0.105	-1.66	0.17	1.48	-1.02	2.7	5.96	1.47	0.952	-1.54	-0.879
0.549	-1.45	0.594	0.31	0.223	0.833	1.24	1.33	-1.29	-0.35	1.92	-0.773	2.92	4.77	0.533	2.12	-1.15	-1.26
-0.673	0.191	-1.18	0.138	-0.387	0.0134	1.39	-0.492	-3.63	0.961	1.6	-0.362	2.75	6.92	1.39	1.12	-1	-1.07
0.811	-0.77	-1.22	-0.376	-0.016	-0.00134	0.0787	1.04	-0.708	0.114	1.28	-0.254	3.5	8.51	1.68	1.64	-0.257	-0.731
0.354	-0.691	-3.44	0.421	0.213	-0.136	1.2	-1.31	-1.31	0.701	1.34	-0.287	2.9	8.71	2.71	1.45	-0.537	-1.28
-0.938	-0.989	-1.17	-0.451	-0.336	-0.526	2.14	0.792	0.0768	0.835	0.0938	-0.492	4.23	9.04	2.6	0.224	-0.972	-1.2
1.11	-0.445	0.265	0.517	0.425	-0.794	-0.107	1.26	-0.482	0.135	0.293	0.197	2.98	7.71	1.59	-0.0493	-0.319	-0.178
2.24	-0.392	0.129	-0.132	0.265	-0.542	2.24	0.931	-1.25	0.228	0.785	0.218	3.94	6.26	1.3	0.888	-0.768	-0.735
0.252	-0.517	2.17	-0.105	-0.194	-0.561	1.55	0.236	-4.33	-0.0453	0.108	-0.759	2.56	8.6	0.874	-0.568	-0.815	-0.876
0.427	-1.13	-1.05	-0.0783	0.0454	-0.108	1.34	0.118	-3	0.0485	0.116	-0.189	3.37	7.25	1.25	-0.146	-0.533	-0.525
2.71	-1.74	-0.79	1.13	-0.0201	0.428	1.59	1.42	-0.87	0.416	-0.0835	0.581	2.09	6.87	0.331	0.309	-1.09	0.408
0.815	-0.902	0.502	0.417	0.357	-0.346	-0.452	-1.23	-1.18	-0.126	-0.182	1.18	0.587	3.19	1.94	0.651	-1.26	-0.0611
0.312	-1.11	-1.18	0.709	0.83	-0.89	0.389	-0.255	-0.16	0.0454	1.05	0.223	0.454	3.3	0.415	0.223	-1.16	0.064
-0.36	-0.666	-1.6	1.03	0.491	-1.08	0.609	0.837	-0.614	-0.117	0.774	0.196	2.33	3.41	0.392	0.245	-0.901	-0.504
0.244	-1.13	-0.562	0.612	0.333	-1.08	-0.107	0.988	-0.555	-0.6	0.859	0.751	1.85	5.15	-0.313	-0.621	-0.582	-1.11
-0.411	-0.177	-0.783	-0.227	0.842	-1.02	0.598	1.64	-0.833	-1.46	0.0112	1.16	2	5.61	-0.311	-0.289	-0.729	-1.02
-0.352	-1.43	0.148	0.0375	1.34	-0.732	0.0811	0.686	-0.557	-1.45	-0.33	0.532	2.27	4.91	1.09	-1.03	-0.831	-1.94
-0.881	-0.109	-0.139	-0.376	1.52	-0.687	-0.181	0.053	-0.476	-1.07	-0.806	0.705	2.5	3.71	-0.149	-1.05	-0.705	-1.29
-1	0.822	-0.353	-0.163	-0.574	-0.672	-0.56	0.881	-0.428	-1.21	-0.901	0.955	2.5	3.14	-0.856	-1.41	-0.634	-0.457
0.803	0.704	-1.79	-0.327	-0.289	-1.11	-0.524	1.03	0.863	-0.427	-0.903	0.677	1.8	3.7	1.81	-0.674	-0.751	0.666
1.24	0.206	-2.17	-0.861	0.256	-0.686	-0.207	0.568	-0.289	-0.579	-1.06	1.66	1.8	4.05	1.11	-1.02	-0.59	0.455
0.173	1.38	-1.77	-0.731	0.515	-0.257	0.132	0.0495	1.19	-1.26	-0.649	1.39	2.9	3.11	-0.506	-0.371	-0.61	0.631
0.283	-0.297	0.673	-0.904	1.65	-0.354	-0.557	0.564	0.919	-1.24	-1.32	1.28	2.45	4.25	-1.34	-1.34	-1.09	0.444
-0.14	0.445	-0.361	-1.13	2.42	-1.05	1.34	0.214	1.71	-0.601	-1.85	1.72	1.46	2.82	-0.34	-1.36	-0.996	-0.535
-1.99	0.227	-2.06	-0.127	3.51	-1.11	0.982	0.855	-0.356	-2.03	-2.08	1.41	1.35	2.28	0.376	-2	-1.14	-1.06
-1.61	0.2	0.0127	-0.816	3.13	-0.802	0.425	-0.108	1.13	-1.74	-2.43	1.27	1.16	3.16	-0.321	-1.81	-1.41	-1.1
-1.19	0.54	0.232	-0.84	3.09	-0.936	-0.377	-0.0127	0.855	-1.04	-2.18	1.28	2.92	3.95	1.65	-1.88	-0.996	-0.85
0.274	0.337	-1.2	-0.706	2.5	-0.882	0.913	-0.162	1.35	-1.77	-3.18	1.07	1.09	3.47	0.279	-1.58	-1.6	-0.776
1.28	-0.469	-0.906	-0.335	2.18	-0.818	-0.309	0.965	-2.45	-2.5	-3.23	1.26	1.58	3.24	0.453	-2.36	-0.921	-0.799
1.33	0.225	-0.565	-0.644	1.42	-0.261	-0.0522	-0.416	-0.587	-1.49	-3.45	1.25	0.829	2.51	0.724	-1.04	-1.43	-0.757
-0.969	-0.632	2.01	-0.945	-0.179	0.247	0.24	-0.296	-0.879	-1.1	-3.87	1.38	0.664	4.4	-0.00479	-1.01	-1.25	-1.71
-2.04	0.212	-1.67	-0.754	-0.291	0.134	1.5	-0.835	1.29	-0.959	-3.9	1.01	1.1	5.83	0.91	-0.636	-0.86	-2.2
-2.79	-0.699	-0.577	-0.864	0.551	-0.512	0.386	1.32	0.689	-1.29	-4.18	1.06	0.711	2.8	0.972	-0.308	-0.262	-1.87
-1.12	1.28	-1.31	-0.882	0.549	-1.08	-1.25	-0.353	-2.19	-2.72	-3.92	1.32	1.56	4.39	1.3	-0.603	-0.343	-0.989
-0.235	0.154	-1.07	-1.01	-0.849	-1.14	-0.605	1.28	-1.92	-1.34	-2.81	1.17	1.48	1.97	0.295	-0.233	0.956	-0.105
0.889	-0.416	0.133	-1.43	-1.07	-0.828	-0.871	1.35	1.23	-0.343	-1.73	-0.00386	1.88	2.86	0.722	-0.468	1.4	-0.572
-0.449	1.04	0.0382	-1.79	-1.75	-0.916	1.47	0.52	1.18	-0.926	-1.7	-0.315	1.44	4	-0.691	0.0956	1.61	0.679
-0.885	1.34	-0.446	-1.65	-1.44	-1.59	-1.23	-0.486	-0.0248	-0.826	-2.19	-0.879	1.56	4.86	0.0157	-0.12	1.14	0.332
-0.348	1.16	0.191	-1.51	-1.67	-1.92	0.0759	1.23	-1.49	-1.42	-2.62	-1.04	1.29	5.79	0.755	-0.185	1.05	0.058
-1.59	0.281	-0.731	-1.35	-1.58	-1.77	-0.893	0.774	-0.389	-2.04	-2.36	-0.526	1.63	5.36	-0.969	-1.66	0.34	0.414
0.424	1.14	-2.22	-0.821	-1.04	-1.76	2.13	0.244	0.212	-1.97	-0.991	-0.876	2.14	2.1	-2.03	-1.94	0.089	-0.457
0.199	-0.0923	-0.0261	-0.544	-1.28	-2.24	1.68	0.476	-0.452	-2.08	-1.26	-1.16	1.88	2.63	-2.13	-1.43	-0.125	-0.418
-1.02	1.95	-0.44	0.145	-1.28	-2.67	-0.566	0.671	-2.14	-2.56	-2	-0.547	1.2	2.81	-2.13	-1.91	0.722	-1.2
0.0145	2.12	-0.753	0.35	-1.55	-2.44	-0.0257	1.39	-0.542	-2.74	-2.54	-0.898	2.43	4.18	-1.63	-1.75	0.293	-0.873
0.989	2.72	1.74	-0.0462	-1.86	-1.66	1.42	1.13	0.246	-0.52	-2.6	-1.05	1.5	3.43	-0.11	-1.06	0.305	-1.04
0.667	0.343	0.942	-0.391	-0.0557	-1.32	0.549	0.587	-2.02	-0.625	-2.43	-1.09	1.21	2.69	-0.706	-1.48	0.527	-0.995
-0.314	0.864	0.522	-0.24	-0.373	-0.928	1.98	0.948	-1.5	0.284	-2.59	-0.811	0.846	3.32	-0.263	-0.936	0.294	-1.06
0.464	-0.343	0.623	-0.298	-0.825	-0.439	2.08	1.44	-1.01	-0.807	-3.18	-0.649	1.53	1.25	-1.08	-0.744	1.19	-0.82
-1.24	-1.15	0.693	-0.597	-0.695	-0.347	2	1.32	-1.91	-0.0489	-2.16	-0.411	2.16	3.43	0.264	-1.12	0.957	-1.26
-0.368	0.22	-1.25	-0.641	-0.113	-0.346	1.44	0.649	0.229	-0.12	-2.13	-0.685	-0.293	4.39	-0.571	-0.898	0.782	-1.52
-1.22	0.298	0.043	-0.438	0.939	-0.795	0.666	1.75	-0.0435	-0.582	-2.5	-0.641	1.11	5.85	-0.425	-0.886	0.993	-1.33
0.957	0.617	0.0723	-0.448	0.447	-1.01	-0.685	1.04	-0.903	-0.301	-3.5	-0.616	1.76	3.72	-0.434	-2.01	0.882	-1.61
0.831	0.383	0.474	0.178	2.95	-0.954	-0.774	1.42	0.393	-0.399	-3.55	-0.886	1.99	4.27	-0.459	-1.16	0.403	-1.11
1.26	-0.672	0.244	0.0985	3.27	-0.973	-0.0494	1.3	-0.474	-0.373	-3.3	-0.536	0.0791	3.91	0.301	-1.71	0.617	-1.63
1.07	-0.114	-1.15	0.725	0.801	-0.995	1.62	2.03	2.07	-1.17	-3.51	-0.677	-0.589	5.54	-1.69	-1.13	1.38	-2.01
0.356	0.363	0.117	-0.301	2.09	-0.029	1.22	0.702	1.85	-1.01	-3.25	-0.315	1.32	5.67	0.263	-2.16	1.42	-1.35
0.0448	1.29	0.0128	-0.422	1.08	-0.598	0.129	-0.0376	0.368	-0.11	-3.16	-0.859	2.2	3.75	0.222	-1.32	1.58	-1.32
-0.319	0.778	0.325	-0.648	2.09	-0.981	-1.56	-0.0606	0.278	0.766	-3.69	-1.37	1.53	3.34	1.3	-1.69	0.827	-0.299
2.64	-0.365	-0.229	-0.31	2.34	-0.998	0.972	1.44	1.49	0.333	-3.27	-1.49	1.28	2.36	-0.962	-2.42	0.956	-0.213
2	0.0682	-0.677	0.16	2.46	-1.48	-1.49	0.0982	1.85	0.0565	-3.37	-1.2	0.0245	3.81	0.382	-1.37	0.509	-0.0327
1.97	0.188	0.337	-0.45	1.3	-1.97	1.48	0.782	-0.095	-0.508	-2.5	-0.742	0.341	3.47	0.463	-1.27	0.873	-0.94
1.05	-1.35	-0.558	-0.725	2.5	-1.84	-0.218	-0.25	-0.918	0.0026	-1.74	-1.29	0.578	3.13	0.142	-1.71	1.08	-0.591
0.0344	-0.242	0.124	-1.01	2.04	-1.08	-0.234	0.0957	-0.261	-0.889	-1.3	-1.42	1.13	1.45	-1.06	-0.751	0.784	-0.622
1.08	-1.25	-0.145	-1.07	2.45	0.668	-0.0153	0.88	-1.75	-1.28	-1.05	-0.231	2.14	1.67	-0.716	0.0681	0.615	-0.166
0.889	-1.14	-1.16	-1.17	2.72	1.05	1.09	0.442	-1.52	-0.668	-1.76	-0.0655	1.13	2.19	-0.435	0.109	0.741	0.437
1.02	-0.962	-1.76	-0.446	2.6	1.39	-0.212	0.528	-0.879	-1.83	-2.41	-0.579	1.09	4.37	-0.542	-0.346	1.34	0.0538
1.62	-0.518	-1.3	-0.302	1.82	1.05	-0.104	1.33	0.306	-1.56	-2.19	-0.932	1.54	3.41	0.0295	0.512	1.29	-0.735
1.2	-1.26	1.08	-0.285	1.58	0.143	0.156	0.699	0.278	-0.953	-0.718	-0.692	1.62	1.99	0.174	-0.0122	1.3	-1.14
2.19	-1.95	-0.624	-0.687	1.84	0.236	-0.427	1.14	-0.643	-1.38	-0.556	-0.759	0.97	3.29	-1.01	1.1	1.71	0.0902
1.29	-2.07	-0.814	-0.592	2.89	0.0428	-0.152	0.473	0.299	-2.33	-1.32	-1.09	0.36	3.09	-1.61	0.977	1.56	0.0526
2.25	-1.85	-0.714	-0.654	2.82	-0.114	-0.0229	0.113	0.745	-1.95	-0.108	-0.715	0.0757	3.21	-1.26	0.923	1.53	-0.506
0.477	0.274	-1.56	-0.618	1.91	0.0487	0.512	0.896	-1.45	-1.26	0.368	-0.885	0.296	3.07	-1.25	0.516	1.56	0.484
2.42	-1.25	-0.498	0.256	2.76	-0.188	-0.992	1.34	0.671	-1.9	0.171	-0.827	1.38	2.4	-1.46	0.978	1.66	2.06
2.44	-2.13	-2.53	0.554	3.85	-0.372	-1.2	1.13	0.122	-1.5	-0.376	-0.81	3.11	3.77	0.509	0.865	0.725	0.613
-0.426	-0.638	-1.63	0.32	3.42	-0.943	-0.509	2.09	-0.352	-1.34	-0.514	-0.202	1.39	3.16	0.256	0.741	0.638	-0.381
1.11	-0.521	-0.202	-0.269	2.7	-1.46	-0.466	0.577	-0.269	-0.219	-0.0689	-0.446	-0.472	2.62	-0.0473	0.94	1.35	0.241
1.7	-0.94	-1.05	0.883	2.77	-1.71	-0.056	0.232	0.81	-0.2	-0.126	-0.482	1.06	2.8	0.0607	1.04	1.38	1.08
0.495	-0.282	-3.85	-0.215	2.88	-1.79	0.456	0.557	0.445	-1.08	0.0408	-0.755	-0.0486	2.26	-0.363	1.08	1.16	0.249
-0.395	-1.46	-2.06	0.667	4.09	-1.47	0.946	0.231	-0.0589	-0.475	-0.504	0.144	0.741	1.94	-0.431	1.52	1.2	-0.155
-0.0859	-2.04	-1.37	1.17	4.81	-1.28	-1.43	0.957	-0.454	-0.691	-1.5	1.08	1.45	3.06	-0.958	1.42	1.02	-0.954
0.0603	-0.234	-1.37	1.45	5.08	-1.7	-0.0134	0.078	-0.0611	-1.03	-1.68	1.01	1.34	1.33	0.157	1.16	0.339	-0.434
0.238	-1.46	-1.43	0.821	6.17	-2.08	-0.838	0.849	0.424	-0.688	-1.32	0.522	1.05	3.15	0.216	0.665	0.382	-1.09
0.183	-2.07	-0.0653	1.08	5.33	-1.67	-0.873	0.43	1.16	-1.56	-1.61	0.113	-0.63	3.95	1.58	1.26	0.0829	-1.14
-1.82	-0.762	-1.89	1.01	4.97	-1.05	-0.772	1.3	1.35	-1.62	-2.09	-0.011	0.367	3.8	1.65	0.809	0.241	-0.913
0.114	-0.465	-0.486	1.34	3.7	-1.2	1.08	-0.349	0.24	-1.64	-1.77	-0.217	0.801	3.08	1.1	0.479	0.0258	-0.34
-2.73	-0.374	0.0234	0.438	3.56	-1.56	-1.78	0.115	-0.733	-1.6	-1.56	-0.714	2.16	2.96	0.187	0.224	-0.759	-0.129
-0.634	-0.55	-0.649	0.768	4.36	-1.95	-0.799	0.141	-0.265	-0.643	-2.63	-1.81	3.56	0.56	-0.233	1.08	-0.993	-0.0377
-0.425	-1.46	-1.02	0.555	4.07	-2.07	1.15	0.355	0.12	0.388	-2.55	-1.5	2.02	0.371	0.392	-0.273	-1.07	-0.76
0.7	-1.24	-0.525	-0.174	2.87	-1.66	-0.898	0.96	-0.299	0.645	-3.04	-1.59	2.38	2.1	0.0716	-0.148	-0.342	-0.276
0.197	-1.09	-1.28	-0.759	1.6	-0.798	-0.157	-0.757	-0.0263	-0.69	-1.96	-1.72	3.7	3.36	-0.781	-0.124	-0.283	0.0366
-0.115	-0.595	-1.48	0.067	2.01	-0.989	-0.234	0.368	-1.31	-1.01	-2.63	-0.489	4.06	2.18	-1.58	-0.382	-0.214	0.326
-0.853	-0.475	-0.976	-0.252	2.34	-1.2	1.03	-0.273	-0.888	0.204	-2.09	-0.00311	3.95	1.93	-1.77	0.369	-0.53	-0.466
-2.2	-1.28	-2.6	0.208	0.816	-1.66	-0.149	0.704	0.248	-0.916	-2.51	0.971	3.08	2.06	-1.57	-0.084	-0.628	-0.278
0.232	-1.63	-0.73	-0.588	1.61	-1.82	-0.294	0.692	-1.19	-0.748	-1.76	0.18	1.36	3.58	-0.926	0.251	-1.4	-0.277
-0.522	-1.33	-0.574	-0.17	0.471	-1.85	-0.631	0.386	-1.69	-1.02	-2.33	-0.0942	2.6	0.646	-0.133	0.0954	-0.952	0.85
0.112	-1.51	-1.18	0.581	0.667	-1.76	0.685	-0.276	1.64	-0.939	-2.15	-1.14	3.12	3.03	0.41	0.713	-0.611	1.53
-1.03	-0.588	-1.07	0.278	0.126	-2.44	-0.145	-0.538	0.0187	-0.763	-2.18	-0.165	2.57	3.75	0.876	0.308	-0.56	0.162
0.64	-1.62	-0.172	0.881	1.37	-2.23	1.6	0.446	-0.769	-0.944	-2.77	-0.217	2.61	2.5	-0.354	0.459	0.14	-0.26
-1.5	-2.09	-0.813	0.78	0.181	-1.89	-1.13	0.62	-2.06	-0.489	-2.38	-0.274	2.44	1.99	0.691	0.195	0.337	-0.0563
-1.66	-1.45	-0.883	0.875	-0.245	-1.85	-0.458	0.563	-0.6	-0.361	-2.76	-0.264	2.41	2.1	-0.518	-0.406	-0.534	0.95
-1.19	-1.21	-2.89	0.0858	0.758	-1.85	-0.643	0.572	-2.57	-1.02	-2.26	0.484	2.63	1.51	-0.191	-0.0385	-0.66	0.891
-0.195	-1.45	-1.11	0.0701	1.12	-1.88	1.75	1.41	1.31	-1.22	-2.11	0.325	2.18	2.01	-0.0492	-0.5	-0.776	-0.127
-1.1	0.231	-2.26	0.73	0.685	-1.79	0.47	0.896	-0.998	-1.01	-2.39	-0.204	2.53	1.63	-0.839	-0.699	-0.705	-0.956
-0.857	-1.33	-0.929	0.624	2.59	-1.78	1.44	1.03	-1.09	-0.778	-1.57	-1.04	2.9	3.18	-0.128	-0.0766	-0.525	-1.03
-1.33	-0.479	-0.789	0.385	3.56	-1.8	0.335	1.21	-1.75	-1.9	-1.04	-0.543	3.36	3.59	-0.729	-0.145	-1.54	-0.74
-0.00558	-1.75	-1.38	0.747	3.37	-1.43	2.51	1.14	0.204	-0.823	-1.49	-0.566	2.48	2.46	-0.342	0.000994	-1.01	-1.5
-1.07	1.08	-2.45	-0.0969	2.94	-1.41	1.18	0.793	-0.569	-0.451	-1.91	-0.245	2.58	1.8	0.214	0.661	-0.551	-1.57
-2.41	-1.39	0.514	-0.101	2.62	-0.00342	1.35	0.741	0.674	-0.723	-1.72	-0.258	3.29	2.08	0.0647	0.0149	-0.645	-1.37
0.288	-0.0641	-1.95	0.553	1.58	0.52	0.567	1.71	-0.294	-0.614	-1.59	-1.07	2.87	2.16	-1.31	0.314	-0.816	-1.86
-0.598	-1.24	-2.91	0.0646	1.56	0.385	-2.61	1.1	-0.668	-0.117	-1.1	-1.02	3.84	2.59	-0.0197	0.714	-0.765	-1.23
-1.86	-2.06	-2.02	0.746	2.91	0.3	0.452	0.273	-2.27	-0.374	-1.21	-0.994	2.78	3.6	-0.985	0.916	-0.0332	-1.12
-0.0495	-1.19	-2.88	0.292	2.68	0.664	2.82	1.71	-1.51	0.176	-1.43	-0.555	2.52	4.34	0.969	0.732	-0.819	-1.04
-0.196	-1.23	-0.551	-0.301	1.82	1.31	0.281	1.04	-1.47	-1.16	-1.3	-0.626	1.94	5.09	-0.074	-0.0869	-0.873	-1.45
0.683	-1.56	0.374	-0.349	1.88	0.0792	0.88	0.633	-1	-0.678	-1.96	-0.331	1.98	4.18	-1.05	-0.337	-0.419	-1.14
0.271	-0.831	0.977	0.116	1.05	0.355	0.33	0.492	-0.258	-0.139	-2.82	-0.316	3.24	5.37	0.886	-0.449	-0.189	-1.47
1.86	-0.667	-1.32	-0.115	0.396	0.621	1.02	0.236	-1.31	-0.689	-2.76	-0.566	2.11	3.34	1.41	-0.458	0.247	-1.44
0.668	-0.69	0.284	-0.301	1.05	0.8	-0.137	0.331	-1.71	-0.206	-2.74	-0.881	2.26	7.29	0.321	0.576	0.00992	-1.32
-1.11	-1.61	-1.25	0.00144	1.03	0.693	0.412	0.391	1	-1.13	-1.21	-1.34	2.68	5.81	0.168	-1.42	0.153	-1.21
-1.18	-1.54	-1.19	-0.0182	1.1	0.515	-0.333	1.22	-1.44	-1.33	-1.81	-1.02	2.32	6.33	1.55	-1.81	-0.711	-1.46
-2.53	-2.42	0.662	0.121	0.935	0.422	1.99	0.625	0.595	-1.32	-2.36	0.264	2.64	4.11	-0.463	-0.834	-1.31	-2.16
0.328	-1.51	-0.335	0.0698	0.856	0.0264	0.829	0.721	-0.768	-1.07	-2.06	0.434	1.66	6.4	-0.106	-1.14	-1.04	-1.86
0.524	-0.948	-0.491	-0.132	0.875	-0.334	1.33	1.32	-1.88	-1.79	-2.21	-0.19	0.905	5.34	0.0986	-1.02	-0.973	-1.18
0.512	-1.21	-0.51	0.288	0.616	0.154	1.58	1.3	-1.23	-1.24	-1.43	-0.0708	1.07	5.66	0.413	-0.596	-0.572	-1.41
0.563	-1.76	-1.89	0.371	0.777	0.278	0.832	0.631	0.397	-2.05	-0.541	-0.139	1.17	5.06	1.17	-1.12	-0.798	-1.48
0.176	-0.698	-1.79	-0.012	0.32	0.0528	0.789	0.913	-1.2	-1.74	-0.315	-0.907	2.02	5.88	2.15	-0.439	0.157	-1.35
0.333	-1.09	-1.01	0.275	0.603	0.087	0.643	0.644	-0.63	-1.11	-0.322	-1.24	3.19	5.07	1.84	-1.16	0.0287	-1.7
1.51	-0.613	0.264	0.202	1.28	-0.0958	0.613	1.38	-0.99	-0.177	-1.15	-0.987	3.4	4.76	-0.273	0.216	-0.374	-1.75
0.108	-1.2	0.0409	0.32	-0.0553	-0.242	1.78	1.38	-2.38	0.104	-1.61	-0.952	1.74	4.55	-0.0207	-0.382	-0.538	-0.846
-0.505	-2.25	-0.351	0.127	0.953	-0.595	1.4	1.86	-0.877	-0.0503	-1.99	-0.269	2.57	0.23	0.686	-0.765	0.159	-0.603
-1.58	-2.18	-0.142	0.455	1.09	-1.15	0.226	1.11	-1.11	-0.697	-1.43	-0.234	2.29	1.49	0.68	-0.991	0.495	-0.0841
-1.22	-2.42	-0.716	-0.17	1.11	-0.934	1.04	1.85	-1.16	-0.143	-0.63	-0.957	1.78	2.94	-0.00493	-1.52	0.583	-0.108
0.138	-1.54	-1.18	-1.3	0.704	-1.06	0.798	1.33	-2.74	-1.04	-0.00826	-0.997	3.09	2.44	-0.41	-1.16	0.388	0.192
-0.656	-1.54	1.49	-0.999	1.87	-1.01	1.11	1.44	-1.79	0.195	-0.539	-0.576	2.68	0.918	0.478	-0.151	-0.337	1.02
0.4	-0.854	-0.474	-1.19	1.63	-0.248	3.25	1.9	-0.0689	0.373	0.354	-0.554	2.93	2.81	-0.281	-0.0699	-0.462	0.529
-0.521	-0.577	-0.718	-0.727	0.14	0.235	0.876	1.68	1.09	-0.0111	0.328	-1.06	1.97	3.62	0.919	-0.874	-0.651	1.27
-0.863	-0.576	-1.13	-0.583	0.062	-0.0489	0.504	1.81	-1.19	-0.0642	0.817	-0.54	2.24	4.04	0.718	-0.755	-0.69	1.34
-0.831	-1.49	0.647	-0.433	0.252	0.301	2	1.07	-0.705	0.0302	0.674	-0.216	0.752	2.06	-0.0558	-0.0381	-0.391	1.39
-0.877	-1.14	-0.806	-0.688	0.298	0.707	1.17	1.66	-2.07	-1.1	0.246	0.0321	2.36	2.89	-0.799	-1.04	-0.878	1.28
-0.978	-2.04	-1.41	-0.516	0.537	0.808	0.751	1.04	-0.657	-1.05	0.336	-0.155	1.55	1.45	1.26	-0.694	-0.0516	1.44
0.372	-0.309	-1.19	-0.143	-0.187	0.191	-0.505	1.22	-3.01	-2.47	1.37	-0.688	2.11	2.48	0.357	-0.997	-0.981	1.65
-0.79	-1.95	-1.24	-0.184	0.422	-0.145	0.846	2.25	0.632	-2.06	0.985	-0.341	2.1	4.07	2.06	-1.49	-0.865	1.95
-0.736	-2.55	-1.09	-0.617	-0.416	0.223	1.23	0.528	-2.18	-3.04	1.11	-0.878	0.638	3.29	0.822	-0.73	-0.778	1.81
0.605	-0.77	0.0639	0.236	0.211	0.331	-1.16	1.35	-0.41	-2.3	0.377	-0.874	1.8	1.95	0.82	-1.54	-0.447	1.11
-0.673	-1.76	-1.12	0.00711	1.42	0.233	0.352	0.432	-0.315	-1.76	0.218	-1.16	2.23	4.41	1.17	-0.556	-0.355	1.38
0.0767	-0.131	-0.325	0.18	1.59	0.827	1.91	1.25	-1.44	-1.67	0.893	-0.987	0.751	3.25	1.28	-1.5	-0.518	1.4
0.337	-1.78	-2.65	0.0967	1.21	0.692	-0.633	1.21	0.965	-1.3	1.09	-1.15	-0.345	1.77	0.129	-1.45	-0.705	1.38
-0.46	-1.23	1.37	-0.349	1.18	0.606	-0.419	1.82	1.08	-1.77	1.84	-1.96	0.667	3.08	-0.937	-0.654	-1.31	1.46
-1.21	-1.93	-0.174	-0.204	-0.528	0.016	1.21	1.53	0.319	-2.46	1.22	-1.54	0.0407	1.37	0.417	-0.671	-1.04	1.25
-1.82	-0.0146	-0.823	-0.132	-0.151	-0.187	-0.315	1.7	0.193	-1.65	1.23	-0.898	0.269	1.56	-0.307	-0.917	-1.26	1.03
-0.891	-1.03	-0.527	0.0392	0.512	-0.756	-2.06	2.08	1.4	-2.06	0.542	-1.02	0.674	2.36	-1.19	-0.402	-1.28	0.971
1.31	-1.78	-0.858	0.0197	0.31	-1.6	0.78	0.303	-0.25	-1.74	-0.371	-1.06	0.999	1.43	-0.263	-0.446	-1.56	0.229
0.74	-1.54	1.79	-0.138	-0.0667	-1.7	-1.63	0.842	1.26	-1.03	-0.579	-0.854	0.0184	1.1	0.784	-1.36	-1.21	-0.537
-0.181	-1.08	0.161	-0.319	0.137	-1.06	1.78	1.08	-0.108	-0.822	-0.308	-1.33	-0.646	0.287	0.396	-0.491	-1.75	-0.563
-0.116	0.979	-1.27	-0.811	0.766	-0.167	0.888	1.96	-0.323	-0.127	-0.777	-0.982	0.481	0.0526	0.77	-0.365	-1.69	-0.436
0.744	0.594	-1.09	-1.75	1.2	-0.549	-1.61	1.73	-1.08	-1.35	-0.818	-1.43	0.987	1.19	-0.51	-0.836	-1.69	0.205
-0.771	0.656	-0.0277	-1.85	1.69	-0.531	-0.118	0.804	-0.618	-1.87	-0.598	-1.69	1.74	2.27	1.07	0.857	-1.83	-0.698
0.299	-0.58	-0.282	-1.02	0.524	-0.0997	2.91	0.577	-0.871	-1.39	-1.18	-1.85	1.22	3.37	-0.291	-1.13	-1.95	-0.9
0.255	0.771	-2.65	-1.32	-0.437	-0.462	0.185	0.85	-1.14	-0.633	-0.883	-1.59	0.562	1.44	-0.371	-0.92	-2.31	-0.991
1	-0.919	-2.85	-0.913	-0.671	-0.848	0.256	1.06	-2.51	-0.623	-1.28	-0.754	0.789	1.62	0.507	-1.67	-1.42	-1.11
-0.351	0.785	-2.03	-0.973	0.13	-0.92	-0.035	1.41	-3.45	0.167	-1.82	-1.01	-0.89	0.454	0.602	-1.3	-1.23	-0.738
0.143	-0.923	0.347	-1.19	-0.469	-1.35	-0.327	0.7	-1.82	-0.0382	-2.01	-0.981	-1.49	3.18	0.12	-0.331	-0.293	-0.71
0.131	-0.00956	-0.15	-1.36	-1.33	-1.66	-0.54	1.67	-1.98	-0.148	-2.14	-1.19	-0.534	4.37	1.17	-1.48	0.633	-0.389
-0.021	-0.266	0.161	-1.06	-0.606	-1.48	-0.16	0.573	-0.334	-1.5	-2.45	-1.23	0.15	4.62	1.14	-1.02	0.0674	-0.0475
-0.803	-0.402	-1.61	-1.18	-0.26	-1.42	0.535	0.559	-2.6	-2.11	-1.67	-0.98	0.707	4.1	0.65	-0.308	-0.0704	-0.128
-1.19	1.46	0.00847	-0.628	0.863	-1.2	-0.477	0.776	-1.76	-2.48	-1.73	-0.368	-0.78	4.37	0.396	-0.165	-0.0917	-0.0328
0.142	0.419	-1.17	-0.31	1.25	-1.38	0.187	0.587	0.157	-2.2	-2.08	-1.42	-0.0783	1.5	1.49	0.484	0.737	0.234
-0.126	1.16	-1.57	-0.221	0.234	-1.43	-0.402	0.995	0.33	-1.59	-2.05	-1.25	-0.62	2.06	1.09	0.0762	0.872	-0.536
-0.681	1.78	0.62	-0.467	0.107	-1.04	0.276	0.881	-2.04	-1.99	-1.9	-1.61	-0.835	3.33	-0.273	1.13	0.591	-0.943
-1.2	0.116	0.873	-0.992	0.381	-0.666	1.66	-0.0783	-1.98	-2.3	-1.7	-1.08	-1.6	2.65	1.68	0.0613	0.689	-0.599
1.6	0.317	-0.493	-1.33	0.271	-0.284	-0.469	1.16	0.214	-1.72	-2.31	0.263	-0.0983	1.47	-0.123	0.701	1.14	-0.207
1.27	-0.183	-0.885	-0.98	0.402	-0.137	-0.383	0.0743	1	-2.31	-3.14	0.339	0.102	1.88	-0.192	0.89	1.33	-0.139
0.563	0.303	-0.135	-1.28	0.591	-0.363	-0.492	1.19	-1.77	-1.82	-1.85	0.95	0.805	3.12	1.02	-0.296	0.575	-1.13
-0.738	0.753	0.428	-1.39	0.683	-0.612	1.4	-0.199	-1.9	-1.51	-2.33	1	0.267	2.88	-0.403	0.368	1.19	-1.06
-0.711	0.611	1.24	-1.01	-0.598	0.219	0.519	1.03	-0.884	-0.37	-2.18	0.41	-0.193	2.94	0.263	-0.375	1.32	-0.853
-1.78	0.38	-2.46	-1.59	-1.17	0.742	-2.75	0.348	-1.3	-1.38	-2.35	0.606	-1.04	3.01	-0.361	0.0505	1.05	-1.36
-1.68	-0.24	-0.705	-1.42	0.00537	1.03	0.851	0.0481	-2.27	-1.05	-1.94	0.0888	-0.0469	2.49	0.214	1.08	0.736	-1.32
-1.53	-0.943	-0.62	-1.62	-0.572	1.49	-1.7	-0.313	0.256	-0.746	-2.16	-0.189	-0.0401	0.15	1.21	0.254	0.872	-0.993
0.528	0.027	-0.335	-0.746	-0.706	2.19	-0.181	0.0708	0.589	-1.16	-2.2	0.487	0.0892	1.36	-0.2	0.247	0.353	-0.979
-1.27	-1.63	-0.601	-0.717	-1.22	1.78	-1.39	-0.485	0.858	0.0512	-2.07	1.06	0.329	1.71	0.782	-0.365	-0.203	-0.725
-2.27	-1.36	0.907	-0.56	-1.93	1.36	-0.103	-0.204	-1.13	-0.0632	-3.18	3.49	0.803	3.19	0.228	-0.517	-0.89	0.435
-2.33	-2.1	-0.732	-1.54	-1.37	-0.273	-1.9	0.21	-1.76	-0.235	-2	2.9	0.728	3.79	-0.285	-0.279	-1.09	1.06
-1.48	-1.1	-1.62	-1.41	-1.55	-0.0388	-1.52	0.332	-1.67	-0.603	-2.08	2.02	1.32	1.89	-0.601	-0.211	-1.44	0.453
-0.474	0.358	-0.297	-1.53	-1.3	-0.182	-0.0656	0.259	-0.956	-0.964	-1.95	1.71	0.457	2.05	-1.8	-0.478	-1.53	0.597
0.998	-0.636	0.449	-1.68	-1.04	-1.23	0.11	1.28	-0.423	-1.4	-0.321	1.11	0.19	1.33	-1.45	-0.813	-1.09	0.275
0.113	0.717	1.14	-1.15	-2.6	-1.35	1.4	0.68	-0.569	-1.9	-0.21	0.18	1.18	1.18	0.0501	-1.06	-1.16	-0.513
-0.0946	-0.717	1.39	-1.2	-1.1	-0.701	0.489	-0.5	0.836	-0.829	1.07	-0.362	-0.348	2.01	-0.706	-0.87	-1.35	-1.03
-2.69	-0.832	0.748	-1.61	-1.64	-0.458	0.233	1.49	-2.52	-1	-0.374	-0.105	1.17	1.45	-1.03	-0.923	-0.822	-1.01
-0.336	-1.9	-1.67	-1.25	-2.15	-0.414	-0.82	0.6	0.00706	-1.43	1.23	-0.159	0.466	1.66	0.149	-0.804	-1.24	-0.969
-0.452	-1.47	-0.533	-1.02	-2.44	0.128	0.126	0.659	-1.01	-2.11	1.17	0.149	0.287	-0.192	0.793	-0.332	-1.88	-1.08
-0.299	-0.721	-0.813	-0.848	-1.37	0.687	-0.634	0.549	1.76	-2.16	0.273	0.257	0.369	1.45	-0.844	-1.67	-1.47	-0.262
-0.798	-0.839	-0.425	0.051	-0.964	0.53	2.8	0.52	0.586	-0.96	-0.308	0.384	1.48	1.82	-0.588	-1.13	-1.53	-0.378
0.022	0.405	-0.997	-0.535	-1.47	0.0325	-0.106	0.0672	0.782	-0.906	-0.175	0.0694	0.229	2.84	-0.851	-1.95	-1.43	-0.00206
-0.155	-1.35	-1.1	-0.384	-1.4	-0.282	0.1	0.769	1.31	-0.792	-0.654	0.15	0.653	2.63	-2.01	-1.55	-1.78	-0.00709
-0.261	-0.374	-0.569	-0.496	-1.53	-0.521	0.56	0.846	0.663	-0.342	-1.24	-0.193	0.985	0.529	-0.654	-1.26	-1.07	-0.166
0.057	-0.356	-0.174	-0.38	-1.44	0.14	1.23	1.05	1.25	-1.03	-1.26	-0.557	1.59	0.769	-0.0325	-1.44	-1.71	0.0837
-0.642	-0.993	0.709	-0.945	-2.08	-0.00365	1.96	-0.981	0.903	-1.15	-0.183	-1.09	0.415	2.43	-0.567	-0.943	-1.58	-0.675
-0.282	-0.826	-2.48	-0.517	-2.6	-0.654	-0.552	0.0303	1.01	-0.871	-0.593	-1.65	0.372	0.59	-1.2	-1.13	-1.52	-1.12
0.941	-1.36	2.13	-0.883	-1.49	-0.546	-0.376	0.904	0.923	-0.753	-0.81	-1.79	1.49	1.66	-1.22	-0.958	-1.24	-0.624
1.45	-0.092	-1.38	0.241	-1.6	-0.607	0.304	0.729	1.91	-1.14	-0.533	-2.24	0.444	1.1	-0.944	-0.898	-1.53	-0.0226
0.158	-0.39	0.912	0.3	-1.34	-1.04	-1.13	0.268	0.43	-1.63	-0.644	-2.31	1.45	1.11	-0.825	-0.987	-1.94	0.982
1.24	-1.03	-0.134	0.225	-1.65	-0.943	-1.91	0.388	1.75	-0.345	-0.171	-1.7	1.77	0.619	-0.798	-1.26	-2.11	0.86
0.295	-0.859	-0.0212	-0.698	-1.04	-1.01	-0.511	0.716	0.788	-0.127	-1.27	-1.25	2.16	0.569	-1.91	-0.411	-1.7	0.594
1.93	-0.428	1.83	-1.05	-1.28	-1.08	-1.29	1.37	0.937	0.886	-1.32	-1.33	2.43	-1.36	-0.525	-0.96	-1.93	-0.21
0.533	-0.522	-0.665	-0.737	0.362	-1.38	0.0185	0.555	1.81	-1.03	-1.7	-1.03	1.05	1.56	-1.49	-0.219	-1.28	-0.0642
1.83	-1.14	-2.83	-0.106	0.787	-1.72	-0.374	0.506	1.32	-0.305	-1.08	-1.3	0.585	0.423	-1.67	0.494	-0.829	-0.463
1.37	-0.238	-2.67	-0.211	0.665	-1.7	-0.146	1.18	0.963	-0.95	-0.893	-1.24	0.642	0.502	0.132	0.251	-0.974	-0.154
1.24	-1.2	-2.94	-0.477	0.555	-1.88	-1.25	0.664	0.327	-0.926	-0.57	-1.47	0.372	2.21	-0.407	0.162	-0.942	-0.0162
0.423	-0.735	-1.89	-0.163	0.339	-1.7	0.636	-0.303	1.7	-1.31	-0.356	-1.74	1.33	2.06	-0.103	0.0942	-1.72	-0.573
0.801	-0.866	-1.17	0.423	-1.23	-1.21	-0.133	0.758	-0.403	-1.57	-0.749	-2	1.82	3.38	-0.133	-0.14	-1.65	-0.563
1.39	0.0156	-0.291	-0.279	-0.943	-1.29	-0.49	2.52	0.16	-1.48	-0.517	-1.76	2.35	1.44	-0.415	0.369	-1.68	-0.671
0.0615	0.54	-0.983	0.155	-0.476	-1.23	0.135	0.617	0.432	-0.715	-0.533	-1.21	1.18	0.512	-0.0503	-0.51	-1.73	-1.5
1.11	0.989	-0.0733	0.129	-0.298	-1.06	0.935	-0.0772	0.946	0.0372	0.0984	-1.14	0.879	-1.29	-0.303	-0.981	-1.08	-0.82
-0.244	0.226	-0.201	0.303	0.354	-0.642	0.704	0.507	-0.0499	0.167	0.315	-0.803	1.57	1.82	-0.4	1.08	-0.651	-0.304
0.0425	0.416	-1.23	0.414	-0.429	-0.369	0.475	0.348	-0.835	-0.406	0.567	-1.09	2.14	1.82	-0.509	0.0015	-0.371	-0.42
1.4	-0.0158	-0.0158	-0.2	-0.317	-0.413	-0.242	1.46	1.62	-1.33	-0.854	-1.06	2.21	2.01	-0.587	-0.693	-0.715	-0.788
0.805	-0.86	0.428	0.0429	-0.306	0.68	-0.248	1.45	1.68	-1.47	-1.08	-0.742	1.98	2.03	-1.99	-1.08	-0.382	-0.569
1.1	0.144	0.302	0.416	-1.7	0.237	-0.638	1.24	1.95	-2.08	-1.09	-1.23	1	0.227	-1.5	-0.24	1.12	-0.683
0.0461	-0.936	-0.793	-0.186	-0.75	-0.22	0.306	1.62	0.297	-0.272	-0.824	-1.1	1.04	2.32	-0.587	0.065	1.48	-0.557
1.13	-0.0469	-0.893	-0.525	-1.6	-0.287	0.0414	0.371	0.188	-0.474	-0.982	-1.36	0.499	1.71	-0.346	-1.2	1.37	-0.49
0.19	0.282	-0.847	-0.685	-1.39	1.29	-0.264	0.443	1.59	0.1	-0.958	0.0105	1.67	2.9	0.873	-0.336	1.32	-0.712
1.12	-0.812	-0.265	-0.0572	-2.49	0.579	1.84	1.16	1.73	-0.256	-1.01	1.87	0.879	3.73	0.22	-0.144	1.16	-0.716
1.55	-0.37	-1.98	0.197	-1.81	0.318	0.871	1.55	0.888	-1.58	-0.844	1.07	1.59	2.72	0.243	-0.161	0.842	-1.55
0.857	-0.566	-1.99	0.189	-2.55	0.168	0.201	0.842	-0.3	-1.55	-0.777	0.242	0.604	2.61	0.782	-0.0462	0.561	-1.12
1.44	-0.679	-0.116	0.0184	-0.731	0.00239	-0.259	-0.806	2.26	-0.843	-0.992	0.867	0.504	2.27	0.601	0.0135	0.332	-1.04
1.38	-2.62	-1.11	-0.739	-1.34	-0.317	0.0919	0.247	0.125	-1.12	-0.871	1.32	0.22	2.7	-0.598	0.337	0.218	-1.4
0.913	-0.894	-1.68	-1.07	0.0348	-0.544	1.11	1.54	-0.711	-0.371	-1.05	0.806	0.997	0.591	-0.111	0.257	1	-1.8
2.42	-0.524	-0.0911	-0.8	-0.652	-0.749	0.12	0.904	0.295	-1.44	-1.35	0.308	1.22	1.34	1.24	0.793	0.534	-1.69
2.72	-0.87	-1.28	-0.516	-0.209	-1.1	0.161	1.11	0.971	-1.09	-1.22	-0.979	0.827	1.27	0.233	0.649	0.508	-1.7
1.68	-2.11	0.0675	-0.707	0.581	-1.03	-1.29	1.34	2.66	-1.05	-0.925	-0.93	1.13	1.39	-0.231	1.38	0.303	-2.29
1.57	-1.68	-0.604	-0.399	1.21	-0.505	-0.215	0.725	0.974	-1.03	-1.13	-1.27	1.14	1.83	1.29	-0.102	-0.262	-2.42
0.363	-2	0.022	-0.486	2.77	-0.428	0.705	0.25	1.36	-2.31	-1.06	-1.17	-1.35	1.51	0.8	0.0958	0.189	-1.73
0.517	0.0853	-1.93	-0.0779	1.5	0.37	0.487	0.993	2.19	-1.64	-0.63	-1.1	-0.298	1.72	0.116	0.368	-0.0282	-1.06
1.12	-0.382	-0.915	0.235	1.2	-0.0606	-2.02	0.174	0.39	-0.931	-1.52	-1.45	0.969	2.15	1.19	-0.186	-0.643	-0.655
0.576	0.911	0.26	-0.148	0.828	-0.67	0.0236	1.88	0.788	-0.817	-1.6	-1.71	0.446	1.84	0.548	0.0075	-0.11	-0.762
1.69	-0.928	-1.38	-0.131	0.659	-0.897	1.09	0.197	-0.225	0.243	-1.32	-1.57	1.53	0.754	0.747	0.857	-0.446	-1.11
0.904	-0.096	-2.66	-0.444	-0.0676	-0.321	0.473	1.22	2.45	-0.0914	-0.819	-1.08	2.34	1.36	0.48	-0.874	-0.794	-1.39
1.65	-0.978	-1.77	-0.893	-0.809	0.108	-0.544	0.593	1.3	-0.713	-1.77	-0.848	1.12	2.56	0.259	0.0117	-0.533	-0.768
1.09	1.55	-1.22	-0.755	-0.243	0.183	-2.69	1.03	-1.15	-0.797	-1.23	0.0642	-0.31	1.27	0.941	-0.175	-0.424	-0.176
0.774	1.79	-1.34	-0.443	-0.377	-0.0626	2.19	1.73	1.83	-0.916	-0.462	-0.0433	0.0886	1.01	-0.136	-0.00552	0.365	-0.125
0.692	0.313	-0.809	-0.753	-0.372	0.151	1.26	0.992	0.882	-1.11	0.284	-0.104	0.545	0.252	-0.363	-0.453	0.152	-0.358
-0.115	-0.0689	-0.304	-1.02	0.964	-0.205	-0.506	0.801	1.89	-0.743	0.0774	0.988	0.867	0.0101	0.16	-0.135	0.0157	0.0107
1.37	-0.236	-1.42	-0.893	0.978	-0.62	2.79	0.435	1.31	-0.836	-0.68	1.61	1.25	0.179	0.831	0.638	0.136	-0.97
0.473	-1.05	-2.36	-0.819	1.32	-0.781	1.14	0.517	-0.654	-1.24	-1.18	0.641	1.19	-0.778	-0.408	1.83	-0.384	-0.927
0.0323	0.387	-0.182	-0.457	1.9	-0.228	-0.919	0.281	1.51	0.0825	-1.66	0.648	0.707	0.405	0.544	1.67	-0.309	-1.01
-0.101	1.01	-1.57	-0.353	2.33	-0.361	-0.747	1.04	0.41	1.58	-1.52	2.03	0.215	0.175	1.84	1.39	-0.831	0.423
1.35	-0.111	-0.693	-0.0254	1.78	-0.491	-0.827	0.897	2.34	1.25	-1.1	1.59	-0.966	-0.114	0.362	2.08	-0.743	-0.687
1.22	0.582	0.859	0.0392	2.37	0.0287	-1.95	-0.206	0.713	1.61	-1.38	0.771	-0.214	1.44	-0.571	0.989	-0.621	-1.2
2.94	0.68	-0.116	0.841	2.11	0.401	-1.11	0.124	1.07	0.445	-1.15	0.337	0.587	0.997	0.74	0.264	-0.727	-1.12
1.31	0.4	-0.956	0.276	0.71	0.202	-0.686	0.762	0.198	-0.528	-1.35	0.327	0.156	1.6	0.34	0.668	-0.666	-1.32
0.399	1.33	-1.58	-0.6	2.96	0.0981	-0.668	1.1	2.56	-1.64	-1.55	0.799	0.32	0.842	0.0545	0.292	-0.762	-1.51
1.04	1.05	-0.157	-1.33	2.7	0.0844	1.08	1.35	1.02	-1.74	-1.76	0.358	0.744	2.54	0.562	-0.0353	-1.08	-1.54
0.977	0.579	-2.05	-1.69	3.42	-0.248	-0.617	-0.805	-0.0125	-1.04	-1.37	-0.171	0.541	-0.0305	0.71	0.525	-0.949	-1.4
-0.528	1.19	-2.63	-0.248	2.97	-0.14	-1.03	-0.0231	0.407	-0.606	-1.28	-0.053	0.9	1.61	1.96	-0.738	0.0285	-1.15
-0.599	1.02	-0.563	-0.594	2.67	0.656	0.299	0.608	-1.48	-0.416	-0.501	-0.352	-0.157	0.179	0.719	-0.831	0.337	-0.658
2.57	-0.299	-0.969	0.501	3.34	0.121	0.897	0.644	1.65	0.609	-1.04	-1.33	0.74	0.127	-1.67	-0.934	0.678	-1.12
2.22	1.06	-0.743	0.15	2.53	-0.25	-1.05	0.435	0.872	0.699	-1.63	-1.16	0.986	0.373	-0.885	0.463	0.946	-0.619
0.933	0.501	-0.659	0.417	2.46	-0.22	0.233	1.59	-0.23	0.397	-1.32	-2.03	0.504	3.16	-0.822	-0.787	1.03	-0.962
1.54	0.715	-1.12	-0.173	1.84	-0.0318	-0.85	0.682	-0.527	-0.442	-0.837	-1.33	0.471	0.0376	-0.823	0.0469	0.364	-0.414
1.61	1.5	-1.31	-0.239	1.71	0.534	-0.907	-0.135	-0.121	-1.21	-1.05	-1.46	0.487	-0.714	-0.874	-0.524	0.029	-0.804
1.01	0.896	-1.54	-0.502	2.03	-0.161	-1.82	0.809	-1.18	-0.744	-0.921	-1.73	0.142	0.868	-2.87	1.15	-0.526	-0.464
-0.194	0.0241	-0.0127	-0.815	2.09	-0.572	-0.473	1.47	0.874	-0.0714	-0.667	-2.47	0.116	-0.324	-1.75	1.67	-0.635	-0.657
1.01	0.719	-0.665	-0.794	1.89	-1.05	-0.332	0.551	0.237	0.576	-0.429	-2	0.195	1.4	-1.9	1.39	-0.567	-0.704
-0.0281	0.241	-1.48	-0.225	1.76	-1.21	-1.02	0.521	-0.0263	-0.197	0.0763	-1.56	0.893	-0.903	-0.331	0.911	0.223	-0.95
-1.33	0.143	-0.548	-0.774	0.882	-0.754	-0.831	0.536	-1.47	1.47	0.0941	-0.782	0.387	1.73	-1.55	0.429	0.18	-1.16
0.0405	0.331	-1.89	0.188	0.665	-1.27	-0.449	1.07	-1.66	0.574	-0.297	-1.45	0.645	0.121	-2.16	0.241	0.238	-1.57
0.927	1.41	-0.458	-0.0788	0.799	-0.775	-2.24	-0.167	1.91	0.053	-0.469	-0.993	0.639	-0.131	-0.795	0.04	-0.0535	-1.11
-1.15	0.361	-1.65	0.402	1.44	-0.786	-1.56	0.57	1.6	-0.546	-0.594	-1.48	0.0654	0.296	-1.71	-0.0223	0.461	-1.57
-0.967	-0.56	-0.736	0.274	1.34	-0.85	0.245	1.46	0.384	0.507	-1.01	-0.982	0.52	-0.371	-1.23	-0.709	0.673	-1.03
-0.856	-1.04	-1.91	-0.0428	1.49	-0.934	-0.0402	0.983	-0.68	1.67	0.695	-0.576	1.42	-0.376	0.176	-0.409	1.01	-1.15
-0.53	-2.79	-1.02	-0.211	1.13	-0.793	-0.0698	1.64	1.47	2.01	0.0586	-0.807	-0.389	1.64	0.0455	0.0167	0.43	-1.69
-0.825	-0.826	-1.11	0.222	1.44	-1.17	-0.18	1.19	0.177	1.91	-0.0921	-0.94	-0.0156	1.97	0.306	-0.512	0.456	-0.651
-0.445	-0.971	-1.72	0.52	2.12	-2.08	-2.34	0.831	-0.419	2.01	0.186	-1.16	-0.525	1.16	-0.19	-0.888	0.551	-0.908
-1.13	-0.429	-1.29	-0.255	1.5	-1.98	-0.349	1.1	-0.0437	1.39	0.0539	-1.53	-1.19	2.51	-2.07	-0.859	0.357	-0.839
-1.29	-1.26	-1.86	0.0849	1.21	-1.93	1.13	1.11	1.16	1.16	0.249	-1.61	0.293	0.175	-1.4	-0.632	0.0474	-1.03
0.589	-1.26	0.292	-0.000674	2.41	-1.49	-0.0724	0.199	1.01	0.904	-0.383	-1.43	0.455	1.81	-0.916	-0.211	0.189	-1.38
-0.879	0.505	-1.16	-0.29	2.25	-0.672	-1.09	0.859	-0.243	1.14	-0.64	-1.93	-0.138	0.0313	-1.19	0.0431	0.421	-1.57
-0.11	-1.24	-0.576	-0.249	1.34	-1.08	-0.811	0.0221	-0.372	1.48	-1.14	-1.38	-0.483	0.503	-1.82	-0.0539	0.257	-2.07
-0.692	-0.628	-0.675	-0.232	2.45	-1.25	-1.33	0.324	2.42	2.21	-1.55	-2.07	-0.867	0.452	-0.646	0.175	-0.207	-2.47
-1.24	-1.86	-0.975	-0.506	1.51	-1.82	0.565	0.109	-1.2	1.33	-0.912	-1.56	-0.944	1.67	-0.709	0.591	-0.775	-2.2
-0.612	-1.08	-0.473	-0.105	0.257	-2.34	0.787	-0.156	-0.325	1.29	-1.24	-1.47	1.09	1.52	-0.463	-0.16	0.03	-2
-1.23	-1.46	-1.07	-0.208	0.451	-2.13	-0.27	-0.183	-0.512	-0.584	-2.11	-1.46	1.51	1.73	-1.79	0.0201	0.14	-2.31
-0.289	-0.928	-1.53	-0.751	1.03	-1.8	0.96	0.0568	-0.5	-0.0908	-1.24	0.176	1.6	2.75	-2.04	-0.727	0.341	-1.64
0.858	0.538	-0.833	-0.294	0.0916	-1.53	-0.709	0.542	1.1	0.0835	-1.16	-0.0957	1.26	0.738	-1.05	-0.353	0.735	-1.63
0.233	-0.392	0.421	-1.37	-0.403	-1.36	-0.421	0.361	0.579	1.38	-0.918	-0.634	1.82	0.498	-1.33	-0.392	0.319	-2.01
-0.914	-0.278	-0.394	-0.812	-0.736	-1.47	-0.197	0.241	0.111	1.78	-1.06	0.632	2.04	0.356	-0.421	-1.5	-0.379	-1.88
0.583	-1.12	-1.12	-1.02	-1.28	-1.14	0.675	-0.237	0.81	2.3	-0.593	2.08	1.79	2.38	-1.28	-0.468	-0.735	-1.59
0.941	-1.09	-0.456	-0.885	-1.29	-0.181	-0.736	0.761	0.0283	2.46	-1.41	0.599	2.87	2.23	-1.14	-0.143	-0.911	-0.803
-1.14	-0.107	-1.92	-0.22	-1.81	0.262	-0.838	0.256	-0.601	1.96	-1.13	-0.301	1.32	4.13	-1.89	-0.324	-0.389	0.38
-0.431	-2.11	-0.905	-0.137	-0.761	0.407	-0.0426	0.234	-1.03	1.3	-0.83	-0.45	-0.0738	0.914	-1.59	0.0502	0.296	-0.508
0.794	-0.526	-0.545	0.201	-0.253	-0.0695	0.446	0.179	0.421	1.45	-1.15	0.0567	0.702	2.3	-1.38	-0.204	-0.335	-1.07
2.26	-1.06	-1.12	0.828	-0.771	0.0858	0.143	0.673	1.81	1.93	-0.512	-0.683	-0.374	1.49	-1.37	-0.825	-1.04	-1.15
1.09	0.17	-0.203	0.212	-0.277	0.302	-0.891	0.817	1.38	1.87	-1.03	-0.862	0.438	1.68	-1.7	-0.301	-1.37	-1.18
2.18	-0.186	-1.64	0.31	-0.832	-0.226	-1.28	1.49	1.29	2.04	-1.22	-0.946	-1.18	1.69	-0.766	-1.09	-0.905	-0.714
0.695	-0.0638	-3.19	0.385	-1.01	-0.479	-0.425	0.249	0.211	1.4	-1.08	-1.49	-0.764	2.03	-2.35	-0.551	-1.37	-0.445
-0.225	0.262	-0.115	-0.179	0.197	-0.506	0.451	-0.599	-0.876	1.59	-1.39	-1.58	-0.416	0.724	-2.07	-0.571	-1.83	-0.411
0.732	-1.28	-1.31	0.192	-0.609	-0.219	0.203	0.374	-0.546	1.91	-1.44	-1.82	-0.711	2.05	-2.59	-0.983	-1.46	-0.0131
-0.158	-0.345	-0.946	0.166	-0.686	-0.411	-0.568	0.55	0.462	1.86	-1.75	-1.66	-0.0581	1.81	-1.75	-0.0396	-1.03	-0.35
0.628	-0.713	-2.4	0.0497	-0.798	-0.414	0.538	-0.367	0.484	1.59	-1.71	-1.51	-0.503	3.25	-1.69	-0.384	-0.82	-0.277
1.61	-0.864	-0.774	-0.771	0.588	-0.934	0.0232	-0.169	0.215	2.28	-2.86	-2.25	-1.09	5.48	-0.646	0.19	-1.65	-0.667
1.15	-0.887	0.335	-0.0621	-0.117	-1.18	-0.853	-0.04	-0.283	1.43	-2.94	-2.52	-0.498	2.13	-0.0679	-0.421	-1.7	0.234
1.41	-1.51	0.898	-0.562	-1.07	-1.09	-0.326	0.0402	1.99	1.25	-1.63	-1.53	0.0228	5.73	-0.312	-1.3	-1.2	0.216
-0.499	0.324	0.00596	-0.0662	0.171	-0.612	-0.569	-0.215	0.394	0.31	-2.06	-1.41	0.0197	3.54	-0.0707	-1.03	-1.12	0.053
2.11	0.216	-2.83	-0.657	-0.575	-0.898	0.276	-0.364	0.475	0.424	-2.53	-1.61	0.443	5.19	-2.48	-0.698	-0.953	-0.0943
0.958	0.566	-0.902	-1.36	0.169	-1.47	-1.7	-0.0794	-0.744	0.00412	-2.45	-1.56	0.268	4.22	-0.809	-1.83	-0.727	1.18
0.279	-0.297	0.126	0.0401	-0.293	-1.77	-1.17	0.281	0.229	0.942	-2.19	-1.51	0.0545	4.55	-1.62	-1.29	-1.15	1.07
0.813	0.174	-1.99	-0.644	-0.181	-1.99	0.607	-0.613	0.165	0.00816	-2.33	-1.47	0.603	5.21	-2.44	-0.723	-1.05	0.48
1.86	-1.02	-0.573	-0.611	-0.00314	-1.95	0.833	-0.464	-0.558	-0.0992	-1.91	-0.784	0.834	4.35	-2.17	-0.043	-0.988	0.245
2.41	-0.375	0.408	-0.666	1.87	-1.28	0.314	-0.57	-0.037	-0.268	-1.49	-1.1	-0.0546	5.09	-0.0018	1.18	-1.43	0.078
-0.0767	0.281	-0.592	-0.521	1.83	-1.16	0.133	-0.351	-1.52	0.419	-1.93	-1.39	0.68	4.35	-0.763	-0.296	-1.43	1.27
-1.02	0.635	-1.32	-0.776	1.12	-1.16	0.724	-1.17	-0.767	1.23	-2.41	-0.491	0.608	4.3	-1.44	-0.608	-1.36	0.979
-0.987	0.512	-1.56	0.0224	0.769	-1.5	-1.44	-0.074	-1.27	1.61	-2.43	-0.51	0.386	4.2	-3.67	0.188	-1.34	0.186
-1.03	0.128	-0.278	-0.316	-0.485	-1.32	-0.695	-0.167	1.25	1.29	-1.48	-0.451	-0.177	3.88	-2.23	0.331	-0.977	0.281
-0.25	-0.472	0.373	-0.534	-1.45	-1.76	-2.02	-0.591	2.02	0.944	-1.91	-0.00537	-0.206	4.08	-1.02	0.449	-1.01	0.179
-0.351	-1.9	-2.2	-0.0539	-1.46	-1.93	-1.84	-0.53	0.73	0.343	-1.69	-0.413	-1.02	3.27	-1.62	-0.702	-1.19	0.2
-0.134	-1.65	-1.97	0.657	-1.03	-1.41	-1.07	-0.3	1.02	0.29	-2.2	-0.534	0.0763	2.5	-2.06	-0.753	-1.09	-0.234
-1.38	-0.934	-0.414	0.219	-1.4	-1.06	-0.052	1.3	-0.524	0.657	-1.76	-0.924	0.0651	2.1	-2.36	0.0733	-0.893	-0.39
-2.51	-2.31	-0.838	0.186	-2.29	-1.51	-0.98	0.967	-0.512	0.929	-1.3	-0.87	0.0258	2.7	-2.98	0.422	-1.33	0.118
-0.216	-0.767	-1.06	0.481	-1.69	-1.49	-0.808	-0.473	0.602	1.01	-0.983	-0.751	-0.165	2.6	-3.6	0.506	-0.69	-0.204
-1.68	0.151	-1.84	0.497	-1.51	-1.26	-0.0621	-0.497	1.72	0.571	-0.823	-1.22	-0.39	1.81	-2.56	1.51	-0.582	-0.0818
-0.431	-0.649	-1.97	0.224	-1.77	-0.938	-0.201	-0.703	-0.087	-0.0486	-0.853	-1.44	-1.88	3.78	-1.05	0.882	-0.988	-0.0808
-1.15	-0.761	-2.48	0.824	-1.74	-0.926	-0.754	-0.558	0.928	0.512	-0.889	-0.967	-1.35	2.97	-1.17	0.782	-0.562	0.368
-1.54	0.814	-1.37	0.933	-1.5	-1.22	-2.39	-0.257	-0.315	-0.247	-1.07	-1.11	-1.24	3.62	-0.562	0.908	-0.705	0.69
0.0917	-0.762	-2.68	1.1	-1.83	-1.93	-0.123	-0.81	-0.13	0.0972	-0.839	-1.7	-0.168	1.57	-1.39	1.7	-0.386	0.862
-0.207	-0.913	-1.98	1.03	-1.64	-2.39	0.12	-1.24	0.48	-0.496	-0.543	-1.68	-0.546	1.35	-0.911	0.0963	-0.38	0.883
0.394	0.197	-2.18	1.08	-1.57	-2.35	0.152	-0.551	0.943	-0.356	-0.292	0.242	0.244	-1.48	-1.12	0.114	-0.655	0.67
