# Supplementary material for: Metabolic sensing in AgRP neurons integrates homeostatic state with dopamine signalling in the striatum
Source: eLife journal article supplement (doi:10.7554/elife.72668), 2022-01-12
Supplement: fig5-data1 [file Fig5E.xlsx]

## Sheet: Sheet1
NFO							CHOW							PB
-0.119	-0.975	-0.79	-0.811	0.00102			-0.101	0.183	0.241	-0.458	1.69			-0.692	0.945	0.294	-0.742	0.915
0.929	0.187	-1.68	-1.91	-0.445			-0.562	0.418	2.8	-1.61	0.725			-0.842	1.21	0.296	-0.453	0.514
1.55	0.398	-0.641	-1.5	-0.926			-0.639	2.55	3.17	-0.612	0.78			-1.08	0.805	0.573	-1.5	0.353
1.02	0.463	-0.827	-1.28	-0.855			-0.916	-0.469	1.72	-1.85	1.99			-0.722	1.22	-0.644	0.0492	0.513
0.732	-0.748	-0.388	-0.445	-1.21			-0.355	0.267	0.718	-0.734	1.85			0.842	0.842	-0.876	0.25	-1.69
1.46	0.522	-0.535	-1.49	-1.35			-0.613	0.97	0.073	-0.272	1.2			0.99	0.144	-0.215	-0.0284	-0.0738
1.69	0.261	-0.987	0.287	-0.198			-0.448	0.839	-0.137	-0.795	-0.557			1.05	0.567	-0.557	-0.0738	-0.71
1.46	-0.511	-0.845	0.147	-0.162			0.145	-0.382	0.258	-0.146	2.76			1.76	0.466	-0.0243	-0.197	-1.06
1.48	1.25	0.115	1.35	-1.53			0.219	0.735	0.465	-0.288	1.3			1.1	0.92	-1.05	1.08	-0.39
1.79	0.924	-0.624	0.177	-0.117			0.469	0.346	-0.188	-0.0784	1.03			0.604	1.56	-0.75	-0.0744	-0.0357
1.65	1.38	-0.291	0.667	-3.18			0.751	0.173	-0.165	-1.09	0.24			0.122	2.01	-0.703	-1.33	0.171
1.37	1.12	0.85	-1.2	-1.84			0.301	0.959	0.732	-1.41	-1.03			-0.253	1.55	0.251	-0.692	-0.425
0.938	0.623	0.514	0.172	-0.51			-0.0301	1.68	0.936	-1.08	0.292			-0.481	1.87	-0.0436	-0.0146	-1.06
1.33	2.05	0.129	1.42	0.0797			-0.12	1.72	0.358	0.545	1.15			-0.719	1.05	0.317	-0.137	0.67
0.83	0.499	-0.267	1.78	0.331			-0.0408	0.952	0.818	-0.671	0.15			-0.47	2.79	0.683	-0.224	0.271
0.821	-0.466	-0.524	1.03	0.0958			-0.304	1.69	-0.573	0.237	-0.886			-0.809	2.14	0.412	-2.08	0.96
1.09	0.546	-0.238	0.468	-1.46			-0.293	1.23	-1.79	1.26	-0.598			-0.164	1.66	0.901	-1.14	0.854
0.491	1.35	-0.112	0.533	0.0465			-0.00762	0.272	-0.915	0.0379	0.902			0.267	0.99	1.77	0.389	-1.04
0.0821	0.249	1.41	-0.36	0.554			0.258	-0.302	-2.13	1.79	-0.133			0.645	0.125	1.22	1.8	-0.158
-0.00575	-0.199	1.82	0.283	-1.14			0.0805	-0.356	-2.25	1.3	1.07			0.182	0.961	0.65	0.406	0.0789
-0.106	-1.01	2.5	0.475	-0.753			-0.516	-1.19	-2.25	-0.726	0.58			0.0862	-0.249	1.09	0.396	-0.0115
0.0801	0.617	2.16	-1.56	-0.33			-0.432	-0.277	-1.7	-0.431	0.233			-0.27	-1.31	0.814	-0.998	-0.518
0.233	0.503	1.76	-1.17	-0.975			-1.17	-0.708	-2.09	-0.262	0.0903			-0.572	-0.158	2.56	0.857	0.512
0.143	1.05	1.77	0.349	-1.2			-1.76	0.397	-0.945	-0.0419	0.204			-0.877	-0.888	2.25	-1.58	-0.617
0.238	-0.53	1.58	0.357	-0.993			-2.12	0.382	-1.7	0.478	-0.603			-1.12	-0.502	0.844	0.0463	0.543
0.0335	-0.0925	0.562	0.349	0.325			-1.47	1.45	-0.61	0.192	-0.686			-0.903	-1.03	-0.248	0.574	0.899
0.166	0.27	0.722	-1.75	-1.69			-0.483	0.179	0.867	-0.512	-0.113			-0.972	-0.334	-1.33	0.00513	1.33
0.56	-0.0561	1.15	-1.69	-1.35			-0.26	1.55	0.889	-0.206	-0.598			-1.62	-1.02	-1.73	1.02	0.108
2.3	0.0227	0.452	-1.19	-1.23			-0.41	1.02	0.814	0.383	-1.01			-1.3	-1	-0.807	2.48	0.177
2.09	1.16	0.323	-1.18	-1			-1.09	1.71	-1.4	-1.68	1.3			-0.813	-0.8	-0.566	2.33	-1.92
1.69	0.319	-0.0764	-1.86	-1.8			-0.65	0.684	-1.24	-1.45	-1.1			-0.355	-0.974	-2.07	-0.0462	-0.334
1.06	-0.326	0.126	-2.52	-1.54			-0.488	1.94	-1.5	-0.0522	-0.115			-0.808	-0.443	-1.33	0.636	-0.616
0.78	0.56	0.89	-0.667	-1.78			0.619	0.673	-0.44	-1.66	-0.626			-1.05	-1.36	-0.729	0.412	0.706
1.19	-0.748	0.585	0.418	-0.543			0.96	0.0817	-0.294	1.14	-0.0961			-1.11	-1.24	-0.175	-0.204	1.56
0.996	-0.0668	1.35	-0.118	-0.648			1.51	-0.0491	0.0247	0.00279	0.914			-0.729	-0.681	-0.875	-0.25	1.97
1.08	1.57	1.88	-0.41	0.369			1.88	0.518	-0.653	-1.01	0.368			-0.848	-1.11	1.25	0.668	0.933
1.14	0.275	1.42	-1.87	0.361			2.33	-0.709	-0.985	-1.43	-0.699			-0.486	0.137	-0.0472	1.56	1.4
1.07	0.518	0.803	-0.858	0.0565			1.98	0.412	0.265	-1.67	-1.68			-0.73	-1.97	-1.2	-1.48	-1.26
0.41	-0.724	1.05	0.409	1.28			2.29	-0.339	1.04	-1.51	-1.29			-0.673	-0.669	-0.757	-0.522	-0.0399
0.295	1.14	0.297	0.434	0.426			2.39	-0.235	0.574	0.0413	-1.45			-0.73	-1.87	0.139	0.468	-0.274
0.895	-0.673	0.078	0.464	0.647			2.19	-0.607	0.0147	-0.539	-1.11			-0.764	-0.968	0.446	-0.35	0.365
1.1	0.616	-0.754	0.447	-0.323			2.16	0.819	-0.453	-0.373	-0.759			-1.24	0.392	-1.32	0.181	1.53
0.826	-0.74	-1.85	-0.607	0.182			2.31	-1.57	-0.278	-0.207	-0.8			-1.16	0.582	-0.536	-0.0323	1.83
1.17	-1.68	0.418	1.83	0.197			1.9	-0.482	-0.656	-0.602	-0.397			-0.741	-0.218	1.4	0.205	0.0671
1.17	-1.98	1.01	0.242	-0.0779			1.65	-0.14	-0.591	-1.95	-1.97			-0.648	-0.0265	0.539	-1.2	0.894
0.736	-1.58	1.07	-0.554	-0.0377			1.86	-2.08	0.506	-1.81	0.39			-0.576	0.526	1.36	-0.159	0.667
0.511	-1.25	1.41	-0.197	0.671			1.52	-1.88	0.533	-1.48	0.292			0.0456	0.194	0.401	-1.2	1.63
0.378	-0.899	0.0122	-1.3	-0.965			1.04	-1.88	1	0.538	-0.418			0.666	-1.84	1.66	-1.75	0.871
0.314	-0.309	-0.775	0.807	0.191			0.716	-1.5	0.36	-1.6	-0.932			0.489	-1.19	1.1	-2.1	2.02
-0.0151	-0.576	-0.205	0.402	0.00655			1.11	-1.23	-0.634	-1.11	-1.37			0.376	-0.859	0.0192	1.13	1.48
0.296	0.0269	-0.634	0.535	-0.275			0.983	-1.54	-0.409	-1.18	-0.21			0.289	-0.756	-0.376	1.09	1.58
-0.142	-1.3	-2.08	0.121	0.573			0.438	-1.66	-0.595	-0.944	-2.25			0.651	-0.756	0.0303	2.59	1.04
-0.0386	-2.32	-0.517	1.22	0.0442			0.195	-0.835	0.0846	-0.101	-0.188			0.675	0.702	0.46	0.523	-0.564
-0.172	-1.92	-0.909	1.03	-0.0892			-0.076	-0.238	0.276	1.05	-0.761			1.2	-0.455	-0.902	-0.143	0.713
-0.26	-1.2	-1.57	1.66	0.545			-0.715	0.694	-0.646	1.42	0.451			1.35	-0.287	-1.85	0.738	0.15
-0.303	-2.34	-0.718	0.526	-0.144			-1.37	1.1	-0.638	0.964	1.85			0.971	-0.389	-1.37	2.25	0.246
-0.276	-1.48	0.962	0.94	-1.31			-0.974	2.28	0.0222	0.387	0.647			0.48	-0.018	-0.87	0.292	1.47
-0.612	-0.311	1.32	1.67	-0.338			-0.697	0.928	0.518	-0.00179	0.85			0.598	-0.635	-1.75	-0.424	1.75
-0.858	-0.922	1.95	0.0191	-1.13			-1.08	0.474	-0.0348	-0.736	1.28			0.951	-0.819	-1.69	0.26	0.269
-0.799	-2.32	2.04	1.92	0.077			-1.04	-0.718	0.043	-1.57	0.824			0.352	0.607	-0.334	-0.995	-1.38
-0.361	-1.37	0.586	1.03	-0.66			-1.37	0.644	0.538	0.124	1.24			-0.335	-0.979	-0.791	-0.751	-0.774
-0.605	0.344	1.36	2.12	-0.15			-1.15	-0.571	-0.167	-0.0377	0.458			0.0617	-1.12	-0.648	-1.17	0.0322
-0.489	0.374	0.135	2.12	-0.432			-1	-0.774	0.593	-0.886	0.304			0.176	0.238	-1.4	-0.526	1.18
-0.385	0.251	0.0903	-0.609	2.33			-0.442	-0.198	-0.137	0.702	-0.134			0.19	-0.223	-0.893	-0.557	-0.107
-0.572	2.07	0.533	0.88	0.746			-0.444	-0.349	0.554	0.364	1.75			0.0866	-0.632	-0.684	0.788	0.0613
-0.776	1.65	-0.375	0.521	1.67			-0.131	0.75	-0.438	0.435	0.0554			0.306	0.124	-1.64	-0.738	-0.0716
-1.15	1.76	-0.904	0.801	0.0235			-0.0435	-1.29	0.1	1.02	-0.053			0.326	0.302	0.128	-0.427	0.287
-1.09	-0.184	-1.57	0.307	0.554			0.109	-1.04	1	0.607	1.19			0.545	0.159	0.203	-0.244	-0.723
-1.07	0.606	-0.148	-1.5	1.41			0.0419	-0.202	0.714	0.225	0.602			1.71	-0.464	-0.615	-0.701	-1.73
-0.791	0.921	-0.709	-0.226	1.23			0.0172	-0.273	0.841	-1.36	-0.524			1.75	0.0421	1.28	0.797	-1.3
-0.633	1.81	-1.22	0.209	-0.0363			-0.206	1.55	-0.0953	0.754	0.274			1.61	-1.35	0.737	1.11	-0.523
-0.969	0.646	-1.26	0.746	-0.0389			-0.417	0.48	-0.64	1.01	0.115			1.93	-0.834	1.05	1.64	0.0661
-1.16	-0.485	-1.11	1.38	-0.0547			-0.659	0.0609	-0.195	0.142	0.447			2.47	0.343	0.783	0.446	-0.984
-1.09	0.237	-0.284	1.25	-0.534			-0.847	-0.849	-0.648	0.123	1.25			3.38	1.11	-1.11	-1.15	-0.685
-1.06	0.163	-0.271	-0.991	0.229			-1.01	-0.319	-0.0559	-0.23	0.665			2.42	0.438	-0.584	-0.257	-2.05
-1.3	0.571	1.03	0.863	-0.292			-0.874	-0.762	1.25	0.638	0.506			2.03	2.42	-0.252	0.0133	-1.79
-0.718	0.0994	0.178	-0.367	-0.141			0.273	-0.737	1.14	1.5	1.22			1.78	0.261	0.0397	-1.17	-1.17
-0.464	-0.105	-0.485	-0.732	0.74			-0.187	-0.742	1.4	0.93	-1.07			0.973	-0.158	1.09	-0.0491	-2.03
-0.43	-0.103	-0.482	0.0445	1.12			-0.666	-1.14	2.09	1.34	1.03			0.349	0.381	0.782	-0.14	-0.769
-0.87	0.118	-0.331	-1.72	0.136			-0.115	-1.75	0.35	1.55	0.322			-0.102	0.608	0.533	-0.308	-1
-1.16	-0.834	-0.0501	-0.341	1.51			0.353	-0.454	1.09	1.04	-0.718			-0.391	0.942	1.12	0.732	-1.24
-0.502	-0.256	-1.4	0.703	0.347			0.096	-0.427	-0.196	0.041	-1.45			-0.225	1.05	0.996	-1.03	-1.2
-0.915	2.16	-0.683	0.199	0.404			0.396	-0.474	0.644	0.703	-0.00267			0.551	1.85	-0.601	0.14	-1.02
-0.753	0.0937	-0.873	-0.457	0.845			0.286	-1.24	0.551	0.341	0.545			0.877	0.729	0.137	-1.13	-1.32
-0.835	1.33	-0.321	0.249	1.49			-0.556	-0.875	0.144	0.299	-2.09			-0.107	0.916	0.234	-0.999	-1.48
-1.31	-0.171	-0.813	-0.0394	2.14			-0.46	-1.49	0.616	0.727	1.48			0.0368	-0.244	-0.352	-0.177	-1.23
-1.5	0.189	-0.878	-0.0458	0.566			-0.928	0.173	2.08	1.34	-0.915			0.237	0.304	-0.125	0.645	-0.219
-0.986	-1.16	-1.18	-0.333	1.45			-1.2	-1.71	1.24	2.65	-1.61			-0.381	0.568	-1.25	-0.741	0.0945
-1.17	-0.398	-0.312	-0.563	1.45			-1.09	-0.688	0.349	-0.086	-0.0309			-0.86	1.02	-0.4	-1.73	-1.03
-1.05	1.31	-0.743	0.28	1.9			-0.683	-0.0299	-0.31	1.36	-0.971			-0.721	0.178	-1.24	-1.17	-0.191
-1.78	0.541	-0.975	-0.0828	0.963			-0.955	-0.252	-0.353	0.355	-0.23			-0.28	0.304	-0.318	0.638	1.44
-1.5	0.744	0.225	0.202	1.03			-1.26	-0.13	-1.04	1.44	-0.509			-0.209	-0.327	-0.442	-1.36	1.29
-1.03	0.767	0.405	-0.0588	0.616			-0.886	0.448	0.372	1.79	0.51			-0.0727	-0.441	1.39	1.99	0.893
-1.4	-0.875	-0.801	0.0855	2.08			-0.387	0.401	0.708	1.77	0.139			-0.325	-1.37	-0.176	1.15	0.855
-1.14	-0.251	-0.259	-0.957	0.157			0.229	0.148	0.25	0.0596	-1.42			-0.547	-1.23	1.08	1.14	-0.00707
-0.72	-1.95	-0.417	-0.137	1.05			0.247	0.446	-0.762	0.673	-0.772			-1.06	0.232	1.32	0.735	0.0822
-0.796	0.409	0.2	0.757	0.752			0.967	-0.242	-1.67	1.53	-0.202			-1.42	-0.341	0.899	1.41	-0.773
-1.42	-0.924	-0.00985	0.723	1.89			1.09	-0.832	-0.53	0.558	-1.09			-1.51	-1.05	2.7	-0.656	-0.21
-1.05	0.292	-0.478	-0.149	0.882			0.371	1.21	-1.6	0.288	-1.14			-1.47	-0.937	0.971	1.08	-1.4
-1.53	-0.159	-1.4	-1.09	-0.3			0.135	1.38	-0.432	0.117	-0.818			-1.77	-1.38	0.35	0.549	0.602
-1.42	-0.457	-1.65	-1.51	-0.692			0.358	1.23	-0.567	0.236	-1.32			-1.44	-1.58	-0.3	-0.369	0.324
-1.3	0.0476	-0.646	-0.29	-0.538			0.707	0.799	-1.79	1.11	-1.42			-0.981	-1.64	-1.38	0.302	-0.117
-0.761	0.198	-0.756	-1.41	-0.561			0.486	0.00711	-1.96	1.13	-1.47			-1.24	-1.53	-0.721	0.419	-0.707
-0.848	-2.08	0.195	-1.88	1.42			0.212	0.207	-1.27	-1.35	-1.48			-0.739	-2.68	-0.367	-0.211	-0.614
-1.42	-0.642	0.712	-0.952	-0.244			-0.105	-0.665	-0.667	1.38	-1.43			-0.581	-1.78	-1.6	0.494	-0.985
-1.26	-0.85	1.4	-0.344	0.347			-0.526	-0.189	-0.699	0.989	-0.134			-0.0664	-1.03	-1.49	0.494	-1.38
-1.29	0.328	0.65	-0.685	-1.77			0.409	-0.2	-0.762	0.843	0.334			0.376	-0.494	-0.958	1.35	0.0449
-1.15	0.892	-0.553	-0.341	-0.0566			1.33	-0.54	-1.07	0.717	-1.88			0.576	-1.67	-0.0952	1.74	0.89
-0.416	1.59	0.24	0.076	-0.226			1.84	-1.13	-1.7	0.778	-2.35			0.39	-0.188	-0.281	0.71	0.185
-0.265	2.13	0.115	-1.01	-0.465			1.69	-1.28	-0.875	0.508	-1.11			0.0117	1.12	0.795	1.3	1.03
-0.443	0.985	-0.268	-0.651	-0.646			1.34	-0.998	-1.15	-0.544	-3.95			0.21	0.168	0.943	1.57	1.15
-0.496	0.75	-0.909	-0.385	-1.26			1.33	-0.343	-1.48	-0.802	-2.19			-1.11	2.14	1.09	1.99	0.315
-0.0604	0.106	-0.0647	-0.617	-0.0495			0.341	-1.23	-0.711	-1.77	-1.44			-1.51	-0.479	0.438	1.12	-0.837
-0.0425	0.0784	-0.388	-2.3	-1.03			-0.323	-0.868	-0.987	-0.0566	-0.649			-1.63	0.221	1.28	1.97	0.0627
0.0596	-0.704	-0.361	-1.36	-0.873			0.104	-1.22	-1.03	-0.103	-1.77			-1.89	0.844	1.58	0.643	-0.52
0.945	-0.597	-0.963	-0.631	-0.263			0.39	-1.13	-0.906	0.426	-1.65			-1.35	0.799	1.43	1.67	0.114
1.5	-0.483	-0.963	-1.21	-1.68			0.411	-1.99	-1.51	-0.755	0.0648			-0.577	0.34	2	0.794	0.474
0.81	0.0788	-1.91	-1.12	-0.476			0.706	-0.689	-0.124	-2.05	0.859			-1.17	1.21	4.02	-1.03	-1.08
0.701	1.41	-1.92	-2.22	-1.91			0.805	-0.891	-0.783	-1.05	2.1			-1.24	0.122	4.78	0.656	0.428
0.924	0.239	-0.647	-0.073	-0.41			0.949	0.818	-1.1	-0.627	1.95			-1.29	-0.727	3.64	1.69	-0.746
0.845	-1.02	-1.17	-1.01	-1.63			0.908	0.54	-1.47	-1.21	0.208			-0.568	-0.12	3.66	0.891	-0.105
0.63	-0.61	-1.47	-1.14	-1.1			1.03	-0.303	-0.645	-0.9	1.09			-0.504	0.369	4.02	0.464	-0.869
0.497	0.761	-0.992	-0.939	-0.467			0.942	-1.28	-1.67	-1.94	0.736			-0.328	0.377	2.89	0.689	0.144
0.646	1.13	-0.496	-1.3	-1.61			0.673	-1.62	-1.29	-1.9	-0.591			-0.558	0.286	2.12	1.55	0.878
0.54	0.69	-0.812	-1.06	-0.172			0.436	-1.46	-1.66	-1.46	0.776			-0.972	1.14	2.83	-1.2	0.549
0.674	1.27	-0.245	-0.799	-0.795			0.0728	-0.835	-1.43	-2.13	1.56			-0.959	0.344	2.05	1.1	0.345
0.686	1.06	0.326	-0.212	-1.73			-0.0519	-1.18	-1.92	-0.305	2.06			-1.68	0.194	2.18	0.645	-0.447
0.334	0.702	1.12	0.152	-2.05			-0.59	-1.84	-0.863	-1.86	-0.208			-1.96	-0.543	1.57	2.16	-1.89
0.306	0.471	1.24	-0.139	-1.65			-0.749	-0.927	-0.148	-1.02	0.817			-2.2	-1.24	3.03	0.123	-1.86
0.511	-0.322	0.73	-0.111	-0.756			-0.852	0.833	-0.73	-0.818	0.132			-2.51	-0.754	1.84	0.827	-0.534
0.356	-0.302	1.1	0.184	-0.192			-0.403	-0.644	-0.176	-1.93	-0.957			-2.33	0.626	0.91	1.85	-1.29
0.266	0.101	0.703	1.22	-2.12			0.536	-0.00493	0.536	-1.8	-1.72			-1.75	0.0832	1.09	0.639	-0.825
0.228	0.618	1.32	0.867	-1.99			1.11	-0.415	0.00464	-0.385	0.746			-1.72	-0.00476	1.52	1.9	-0.494
-0.251	0.423	-0.106	-0.49	-0.431			0.849	-0.55	0.0556	-1.22	-0.324			-2.44	0.132	2.39	3.04	-0.116
-0.941	0.567	-0.616	-0.431	-1.38			0.786	-1.17	-0.0312	-1.29	1.16			-2.26	-0.0351	2.06	1.96	-0.873
-0.953	1.25	-0.281	0.275	-1.7			0.822	0.149	0.191	-1.71	1.39			-2.37	0.406	1.33	3.16	-0.114
-1.31	0.997	-0.147	-0.291	-1.66			1.82	0.356	-0.142	-1.52	2.41			-2.72	-0.15	1.66	2.12	0.0566
-1.6	-0.411	-0.887	0.74	-0.402			1.95	-0.885	2.26	-2.04	1.94			-2.67	0.0399	0.695	0.71	-1.05
-1.34	-0.688	-0.617	-1.64	-0.576			2.1	-0.212	2.89	-0.812	3.24			-3.22	-0.409	0.609	-0.0275	-0.482
-0.87	-0.159	0.00117	-1.16	-1.3			1.58	-1.47	2.7	-1.78	1.63			-2.44	-1.32	0.531	0.801	-1.36
-0.77	-0.538	-0.651	-1.18	-2.16			0.835	-1.3	1.63	-1.26	3.09			-1.51	-1.88	1.87	1.59	-0.979
-0.931	0.305	0.0653	-1.27	-2.61			0.624	0.192	1.05	-2.43	3.62			-1.36	-1.7	1.9	1.37	-2.28
-1.06	0.03	0.41	-1.62	-1.62			0.336	-0.12	-0.00439	-2.88	2.77			-1.22	-1.96	2.02	1.97	-1.57
-0.625	-0.411	0.789	-1.98	-1.11			-0.0268	0.997	-0.00421	-2.66	2.36			-1.7	-1.39	1.29	1.19	-1.2
-0.954	-1.11	0.791	-0.762	-1.4			-0.173	0.917	0.532	-0.923	1.12			-1.93	-1.46	0.689	1.32	-0.151
-0.729	-0.347	0.177	-1.76	-0.708			0.414	-1.27	0.123	-0.15	0.158			-1.96	-1.26	1.09	2.92	0.102
-1.22	0.243	0.408	-2.52	0.425			0.708	-0.509	0.576	0.202	1.53			-1.48	-2.52	1.6	2.45	0.23
-1.5	-0.331	-0.352	-1.34	-0.789			1.54	0.742	0.623	-1.07	2.53			-0.715	-2.53	0.959	1.17	-0.858
-1.47	-0.98	1.1	-1.42	-0.943			2.26	1.25	-0.458	-0.789	2.55			-0.668	-1.08	1.8	0.78	-0.494
-0.756	-1.05	0.229	-1.67	-0.0486			2.4	0.199	-0.859	-0.787	1.29			-0.935	-1.43	0.365	-0.105	-1.29
-0.278	-0.683	-0.371	-1.56	-0.0906			1.95	-0.204	-0.238	-0.436	2.61			-0.693	-0.771	0.826	2.9	-0.959
-0.00799	-0.958	-1.05	-1.06	0.325			1.59	-0.31	0.336	-1.68	2.99			-0.715	-2.05	-0.528	2.53	0.402
-0.121	-0.862	-0.346	-1.92	0.933			2.04	-1.26	0.398	-1.93	2.04			-0.996	-0.601	0.255	1.56	3.03
-0.234	0.403	-1.08	-1.18	0.791			1.29	-1.19	0.34	0.739	2.8			-1.38	-1.7	1.07	1.49	1.52
-0.972	0.859	-1.8	-1.62	0.137			0.937	-1.63	1.58	-0.965	3.26			-1.67	-1.18	2.32	-0.0555	1.12
-0.968	1.43	0.13	-1.91	-0.122			1.46	0.0474	0.812	0.107	3.07			-1.06	-1.57	1.57	-0.158	0.609
-1.18	2.04	-1.51	-1.79	-2.33			1.72	-1.13	0.401	-0.476	1.43			-1.02	-0.0269	0.278	1.38	-0.78
-0.895	-0.936	-0.143	-2.59	-0.118			1.43	-0.0285	-0.221	-1.44	3.47			-0.918	-0.333	0.869	1.42	-2.13
-0.757	0.4	0.338	-0.608	-0.505			1.81	-0.927	0.793	-1.11	1.2			-1.22	0.458	0.726	1.86	-1.24
-0.393	-0.182	0.465	-0.543	-0.231			1.63	-0.18	0.811	-1.01	0.413			-1.68	-0.548	1.92	1.6	0.35
-0.608	-1.22	0.181	-0.862	-0.324			0.936	-0.222	1.44	-2.01	1.99			-1.51	0.3	1.89	2.45	-1.05
-0.947	-1.15	-0.397	-0.315	-0.00178			0.769	-0.119	-0.334	-1.23	0.718			-0.411	-0.838	1.28	2.21	0.746
-1.15	-1.33	-0.803	-1.16	-0.642			1.57	-0.277	-0.584	-0.928	1.77			0.0367	-0.562	1.5	1.1	-0.673
-0.658	-1.04	-0.436	-0.0981	-0.977			1.44	-1.43	-0.513	-1.35	2.28			0.269	-0.123	0.178	0.271	-1.19
-0.469	0.259	-1.09	0.221	-0.105			1.38	-0.548	-0.444	-1.23	1.85			0.0499	-1.34	-1.5	1.17	-1.98
-0.163	-0.369	-0.308	0.415	-1.14			1.21	-0.645	-0.699	-0.421	3.78			0.29	-0.181	-1.87	0.676	-0.0415
-0.487	-1.51	-0.252	1.58	-0.615			1.14	-0.535	-0.437	-0.202	3.28			-0.107	0.157	-2.48	1.87	0.486
-0.314	-0.841	-0.118	0.747	1.38			0.976	-0.595	-0.262	-0.707	1.26			-0.19	0.296	-1.08	1.73	1.27
-0.172	0.589	-0.167	0.0978	2.08			1.01	-0.208	0.0922	-0.378	0.138			-0.0959	-0.332	-0.136	-1.27	-0.283
-0.506	-0.723	-0.175	0.5	0.69			1.23	-1.07	-0.607	-0.188	0.133			-0.174	-2.01	-0.562	-0.358	-0.988
-0.591	-1.6	-0.972	-1.25	-0.377			0.999	-0.419	-0.891	-0.851	1.15			0.161	-1.61	0.562	-0.119	-2.01
-1.2	-0.732	-0.914	0.528	0.5			0.698	-1.2	-0.408	-2.31	3.58			-0.128	-2.95	0.356	1.49	-2.32
-0.55	-3.21	-0.758	-1.25	-0.00775			0.652	-1.63	-1.27	-1	1.79			-0.771	-2.13	-1.58	1.37	-1.24
-0.0832	-2.03	-0.723	0.197	0.335			0.213	-1.73	-0.406	-1.44	1.7			-0.0674	-1.85	0.0987	0.713	-1.42
0.599	-1.24	-0.132	1.06	-0.362			0.446	-1.3	-1.04	-0.934	2.01			-0.00076	-1.55	0.59	0.146	-1.02
0.103	-1.1	0.0135	0.483	0.701			0.239	-0.387	-1.22	-1.53	1.3			1.27	-2.36	-0.372	0.277	-0.959
-0.0464	0.267	0.0244	0.115	0.396			0.13	-0.662	-1.27	-1.3	2.53			1.75	-1.31	0.346	0.669	-1.48
-0.441	0.146	-0.388	1.03	0.811			-0.0737	0.062	-2.51	-1.56	0.497			1.47	-0.686	-0.896	0.651	-2.11
-0.377	1.15	-0.736	-0.601	0.869			0.0905	-0.577	-2.14	-0.338	1.74			1.06	-1.54	-0.196	0.973	-2.05
-0.466	-1.18	-1.36	-0.254	-1.23			0.122	0.058	-1.07	-1.39	0.683			1.15	-1.1	0.00428	0.208	-1.24
-0.455	-0.645	-2.2	0.318	-0.635			-0.282	-0.0192	-1.17	-2.52	-0.0354			1.65	0.00782	0.307	-0.703	-1.4
-0.712	-0.235	-1.97	-0.0837	0.752			-0.154	0.497	-1.1	-1.6	0.213			1.25	0.136	0.53	0.203	-0.349
-0.436	0.949	-1.46	-1.26	-0.00488			0.709	-1.34	-2.23	-0.744	1.32			0.828	-0.465	-0.0443	0.772	-1.24
-0.621	0.44	-1.78	1.02	-1.93			1.49	-1.68	-1.34	-0.695	0.764			-0.0957	-1.6	1.92	0.452	-0.292
-0.749	0.291	-1.04	-1.01	0.203			1.13	-0.803	-1.06	-0.0534	-1.16			-1.17	-2.57	3.12	0.947	-0.471
-0.871	-0.559	-1.13	-0.521	-1.03			2.46	-0.676	-1.37	0.65	0.0932			-1.46	-1.74	2.49	2.12	-1.03
-0.799	-1.42	-0.226	-0.92	-0.78			3.57	-1.59	-0.0737	-0.489	1.38			-2.32	-1.2	1.66	2.49	-1.24
-0.874	-1.16	-1.67	-0.482	-0.995			4.45	-0.88	-0.0561	-0.951	1.44			-2.26	-1.97	0.512	1.04	-1.68
-0.768	-1.75	-1.06	-0.513	-1.61			4.34	-1.5	-1.39	0.19	-0.152			-1.02	-2.17	0.763	1.03	-1.5
-0.783	-0.874	-0.845	-0.52	-0.769			4.1	0.478	-1.38	0.239	0.587			-1.36	-2.16	-0.143	2.12	-2.29
-0.267	-1.7	-1.06	-0.662	-0.571			3.55	0.0714	-1.36	-1.43	1.2			-2.07	-1.53	1.89	1.5	-1.35
-0.954	-0.8	-1.02	-0.739	0.402			2.99	-0.095	-1.59	-0.361	1.26			-2.05	-2.46	1.56	1.05	-0.721
-1.06	-1.95	-1.24	-2.2	-0.591			2.65	-0.516	-1.98	-0.0851	0.0273			-1.2	-1.66	1.08	1.21	-1.18
-1.1	-2.87	0.0806	-0.529	-1.01			2.56	-0.131	-2.33	-0.95	0.745			-1.05	-0.216	3.47	1.14	0.308
-1.17	-2.35	0.274	-1.47	-1.59			2.38	-0.671	-1.37	-0.508	1.61			-0.708	-2.24	4.57	1.36	0.0186
-1.09	-2.38	0.805	-0.772	-0.751			2.84	-0.0895	-1.35	0.474	1.67			-0.367	0.237	3.1	1.62	-0.572
-1.13	-1.98	-0.164	-1.14	0.314			3.49	0.206	-2.58	-0.704	-0.199			-0.201	-0.741	5.62	0.849	-0.467
-1.04	-2.48	0.358	-0.172	-1.99			4.76	0.375	-1.87	-0.0564	1.94			-0.34	-0.939	4.63	0.175	-1.26
-1.2	-1.24	0.357	-0.23	0.948			4.25	-1.96	-2.73	0.508	0.344			0.311	-1.62	3.84	0.71	0.698
-1.03	-0.929	1.04	-1.56	-0.475			3.99	-0.128	-2.36	-1.24	0.905			1.2	-0.782	3.02	0.828	-0.18
-0.677	-0.0506	0.468	0.1	1.23			4.02	-0.0758	-1.44	-1.68	0.147			-0.0734	-1.54	2.08	2.03	2.64
-0.858	-0.971	2.15	1.03	0.928			2.79	0.135	-1.73	-0.0543	1.26			-0.617	-1.44	1.84	-0.555	2.22
-0.806	-1.36	2.85	0.398	0.137			2.7	0.273	-1.69	0.697	1.09			-0.696	-0.577	1.77	2.83	1.58
0.0827	0.33	2.85	1.87	-0.0463			2.56	0.634	-2.48	0.0527	0.638			-0.382	-0.0998	0.791	1.86	1.29
0.547	-0.685	1.57	2.09	-0.713			2.21	1.04	-2.61	0.669	1.04			-0.195	0.613	1.04	1.11	0.556
0.567	-0.213	1.36	2.19	-0.257			2.01	0.704	-1.06	0.0338	1.61			-0.0483	1.75	0.699	1.42	-0.143
0.936	-0.222	1.83	1.19	1.11			2.07	0.00651	3.71	0.517	-0.552			0.277	0.479	1.13	2.94	0.309
0.419	0.232	1.98	-0.336	0.114			1.53	-0.263	3.16	-0.554	1.21			-0.206	0.908	-0.952	1.84	0.823
0.473	1.59	1.19	-0.722	-0.668			1.1	1.97	3.08	1.1	1.13			0.134	-0.932	-0.456	1.03	-0.31
0.498	1.01	0.887	-0.245	0.697			1.39	1.68	2.32	-0.439	0.625			-0.115	-0.644	-1.66	1.45	0.089
-0.105	0.429	0.639	0.224	0.858			1.3	2.8	1.84	0.565	0.762			-0.0418	-0.299	-2.87	1.89	-1.32
0.135	0.482	0.24	0.351	0.0651			1.19	3.41	0.359	-1.57	2.09			-0.266	-0.21	-3.39	1.01	0.00771
-0.0508	0.979	-0.699	-0.834	0.979			0.825	2.35	-0.00353	0.438	1.33			-0.363	0.0153	-2.28	0.623	-0.699
-0.338	0.468	-0.256	0.54	0.898			0.825	1.85	0.243	-0.461	0.0171			-0.398	-1.39	-2.64	0.576	-0.073
-0.663	0.948	-1.98	0.549	0.629			0.292	2.44	-1.37	-0.68	1.82			-0.157	-1.42	-1.7	2.56	-0.452
-0.736	0.428	-1.49	-1.39	0.539			0.547	1.6	-0.327	-1.59	1.29			-0.277	-0.401	-1.24	3.06	-0.385
-0.575	0.355	-0.635	-0.49	0.931			0.819	2.22	-0.168	-0.681	0.419			-0.464	-0.391	-1.44	2.72	1.43
-0.313	-0.341	0.749	-0.0483	0.586			1.1	2.16	0.428	-0.365	1.03			-0.52	-0.518	0.33	1.52	1.65
-0.143	-0.0701	-1.03	-0.306	-0.0327			1.69	2.56	1.43	-1.72	3.43			-0.992	-0.741	-0.353	3.07	1.06
0.234	-0.483	-0.42	1.16	0.795			1.81	0.77	1.45	-1.79	0.814			-0.831	-1.67	0.0264	2.23	1.28
0.62	1.02	-0.0225	-0.819	0.627			1.45	2.82	1.68	-1.37	1.87			-0.872	-1.47	-0.19	2.46	2.13
0.885	0.0753	0.537	-1.31	2.31			1.26	0.956	1.67	-0.0186	1.29			-0.74	-1.65	0.994	1.93	1.71
1.05	0.626	0.571	0.958	1.12			1.25	1.05	1.15	0.932	2.36			-0.942	-1.91	1.25	-1.39	2.4
0.486	1.22	-0.289	1.5	0.896			1.21	1.16	0.204	1.27	2.66			-0.931	-1.1	3.15	2.54	2.33
0.0203	-0.0168	-0.461	0.694	-0.096			1.29	1.75	0.935	1.07	3.85			-1.08	-2.19	1.4	1.59	1.55
0.428	0.0318	-0.243	-1.47	-0.171			1.52	3.1	1.29	1.27	4.65			-0.422	-1.89	2.94	2.1	2.48
0.29	0.81	-0.774	-0.226	0.0549			1.5	1.21	1.13	1.73	4.91			-0.891	-0.936	6.89	0.987	2.6
0.672	3.7	-1.5	0.0612	1.07			1.78	0.864	2.67	0.849	5.03			-0.507	-1.88	5.4	1.7	2.31
0.873	2.37	-1.59	0.46	0.137			1.32	1.23	1.8	0.375	4.56			-0.94	-1.5	5.05	3.39	1.31
1.13	2.48	-1.07	0.552	1.59			1.62	2.07	2.02	0.597	4.6			-1.07	-1.73	4.57	1.45	2.66
0.864	1.66	-0.959	0.363	0.388			1.42	1.82	1.24	0.0396	5.55			-1.29	-0.117	5.14	1.79	3.97
-0.078	1.34	-0.396	-0.644	2.5			1.4	1.91	1.22	1.49	4.57			-0.739	-2.54	8.24	1.6	3.32
-0.366	1.76	-0.309	0.987	0.51			1.58	1.85	1.7	2.35	5.8			-0.266	-2.64	6.44	2.35	2.3
-0.259	1.03	0.623	0.794	2.87			1.68	1.1	0.367	2.53	5.15			-0.24	-1.8	5.66	2.52	3.82
-0.136	1.13	1.24	-0.21	0.987			1.72	1.6	1.48	0.89	3.56			0.166	-2.17	3.99	1.57	3.34
-0.652	1.94	0.316	0.617	2.26			1.77	1.15	1.7	1.47	3.96			-0.692	-1.14	4.82	2.8	3.49
-0.453	0.971	-0.587	1.23	2.08			1.69	2.72	0.908	2.06	4.27			-0.559	-1.84	3.57	1.07	2.44
-0.689	0.491	-0.797	1.01	1.52			1.31	2.73	0.436	1.81	3.75			-1.22	-1.12	3.64	1.6	4
-0.635	0.814	-0.487	0.765	1.02			0.949	1.44	0.404	0.892	4.56			-1.63	-2.46	2.87	1.81	3.13
-0.302	1.26	0.778	-0.654	1.94			0.772	2.35	0.0939	3.07	4.43			-1.24	0.0593	4.42	1.22	4.05
-0.738	1.59	0.0656	0.0994	1.16			0.672	-0.0381	-0.0542	2.4	4.56			-1.13	0.345	3.73	3.16	5.54
-0.681	0.618	-0.0706	-2.15	0.23			1.03	1.48	0.0898	1.4	4.83			-1.77	-0.23	2.14	1.77	4.78
-0.443	1	-1.5	1	-0.26			0.282	0.399	1.77	1.36	5.46			-1.54	-0.588	2.15	-0.39	4.5
-0.603	1.11	-0.47	0.761	1.05			0.714	2.63	3.05	-0.263	3.16			-1.07	-0.658	2.48	1.11	4.31
-0.554	-0.74	0.00977	-0.148	1.75			0.437	2.61	2.84	0.624	4.82			-0.25	-1.57	2.33	1.18	4.49
-0.293	0.726	-0.173	1.54	1.48			0.393	1.12	1.96	1.58	2.39			0.788	-0.631	2.82	1.27	3.28
-0.304	1.32	-0.704	0.12	0.786			0.102	1.88	0.578	1.3	3.28			1.14	-1.27	1.78	2.58	3.11
0.0306	1.89	-0.7	0.441	2.42			0.223	0.493	0.318	0.554	1.33			0.878	-0.214	1.89	2.68	2.32
-0.384	1.45	-1.44	0.307	0.853			0.187	1.87	-0.13	1.05	1.63			0.46	-0.323	0.585	3.24	2.29
-0.728	0.837	-1.35	1.73	1.35			0.327	2.13	1.58	0.844	3.41			0.387	-0.997	1.71	1.61	3.02
-0.468	0.363	-1.05	3.89	0.918			0.673	1.22	0.328	2.13	2.4			0.0448	-0.467	2.11	1.64	2.8
-0.603	0.283	-1.11	2.41	0.725			0.652	0.815	1.29	1.28	3.14			-0.541	-0.891	0.723	1.15	1.91
-0.575	-0.545	-0.299	1.99	2.01			0.376	0.937	1.31	0.0504	2.53			-0.266	-0.391	-0.28	1.37	2.8
-0.627	-1.03	0.432	1.52	1.63			0.643	0.0541	2.03	0.764	4.25			-0.000266	-0.204	-0.811	1.92	1.31
-0.925	-0.0345	-0.692	1.19	1.32			0.494	-0.118	0.615	1.32	1.92			0.654	-1.13	-0.0296	1.82	2.11
-0.983	-0.822	-0.126	1.02	1.15			0.388	0.432	0.758	1.76	3.85			1.01	-0.513	0.351	2.72	3.29
-0.58	-0.645	-0.272	1.19	1.23			0.152	-0.52	0.147	2.63	3.57			1.04	-2.04	-0.511	2.1	3.32
-0.578	-0.0475	-0.95	0.997	0.766			0.0952	0.668	0.265	1.05	2.46			0.792	-2.29	-0.115	1.25	3.33
-0.638	-0.764	-0.32	2.38	1.41			0.962	0.522	-1.05	1.05	2.77			0.771	-1.69	-0.945	3.36	2.59
-1.1	-1.21	-0.849	1.59	1.74			1.07	1.25	-0.76	-0.32	3.75			1.12	-1.69	-0.932	3.64	1.23
-0.758	-0.811	-1.32	-0.774	2.8			0.641	0.624	0.246	-0.39	3.14			0.998	-1.26	-1.08	4.25	2.57
-0.963	-0.354	-1.78	1.31	2.37			0.26	-0.371	1.04	1.1	3.25			0.525	-1.77	-1.84	3.5	2.48
-1.12	-0.0517	-1.58	1.17	2.32			0.51	-1.16	1.59	1.15	1.79			0.267	-1.74	-1.72	3.52	2.04
-1.02	0.868	-1.26	1.54	0.362			-0.133	0.58	1.4	0.986	3.73			-0.22	-0.633	-0.963	2.43	2.39
-1.02	0.547	-1.06	0.647	0.558			-0.0203	0.94	0.879	0.304	3.42			-0.363	-1.8	2.53	3.34	1.74
-0.483	0.104	-1.41	-0.00815	-0.357			0.0239	1.57	1.01	-0.238	1.19			0.16	-2.15	2.06	2.5	2.92
-0.607	0.127	-1.52	0.359	0.442			-0.0627	1.27	0.782	-0.0227	3.3			0.0697	-2.13	1.09	3.73	2.66
-0.497	0.231	-1.83	1.38	0.682			0.322	1.29	0.866	1.12	4.12			0.0288	-2.21	3.23	2.26	1.94
-0.605	0.791	-1.37	1.29	0.314			0.258	2.53	0.664	0.397	1.91			0.531	-0.855	4.01	1.37	2.03
-0.645	1.11	-1.24	-0.492	-0.149			0.727	1.9	0.513	0.465	1.64			0.558	-1.2	2.65	4.13	2.29
-0.85	1.38	-1.8	1.16	-1.12			1.95	2.25	0.167	0.514	1.61			0.432	0.26	3.75	4.44	2.72
-0.968	1.08	-1.53	-0.016	0.15			2.79	0.492	-0.261	0.665	1.87			0.199	-0.885	2.56	4.5	3.11
-0.216	0.87	-1.05	0.309	-1.04			2.86	-0.126	0.498	0.242	2.67			0.495	-1.92	2.22	4.23	2.76
-0.118	-0.535	-1.03	-0.413	-0.907			2.21	-0.595	0.617	1.61	3.04			-0.654	-1.42	1.09	6.22	3.68
-0.523	-0.138	-0.484	0.171	-1.29			1.97	1.15	0.253	0.227	1.13			-1.14	-0.536	1.82	3.68	2.84
-0.751	0.492	-0.847	1.29	-1.23			2.07	1.07	-0.434	0.0595	1.97			-0.818	-0.719	1.1	4.43	4.43
-0.737	0.549	-0.505	1.34	0.115			1.25	-0.651	0.62	-0.0707	2.41			-0.989	-1.78	-0.83	4.68	2.99
-0.786	1.59	-1.36	0.167	0.186			0.74	0.962	-0.448	-0.673	2.27			-1.68	-0.974	2.09	2.1	2.42
-0.835	0.498	-1.4	0.758	-1.56			0.961	0.455	-0.662	-0.0463	2.08			-2	0.376	0.519	6.16	2.93
-0.61	0.831	-2.35	1.41	0.662			1.19	0.591	-0.815	0.791	1.87			-1.92	2.13	0.422	7.83	3.2
-0.265	0.827	-1.61	1.13	-0.141			1.48	1.72	-0.977	-0.628	3.26			-1.95	1.9	0.627	7.2	3.39
-0.798	1.23	-1.52	0.512	0.439			1.14	0.479	-0.0589	0.0129	3.56			-1.48	1.97	1.78	7.35	3.15
-0.447	1.12	-0.43	0.0459	1.39			0.893	-0.0104	-0.28	-0.727	5.66			-1.57	1.7	1.18	5.23	2.26
-0.705	2.05	-0.748	0.945	0.739			1.28	-1.05	-0.869	-0.122	5.37			-1.74	3.71	0.59	6.57	3.84
-0.689	0.498	-0.384	1	0.553			0.887	-1.17	-1.09	-0.664	5.02			-1.42	4.47	0.885	5.49	4.17
-0.776	1.84	-0.464	-0.209	0.0638			0.829	0.401	-0.029	-0.148	6.25			-1.9	5.52	1.9	6.67	3.56
-0.651	0.704	0.192	0.209	1.13			1.16	-0.727	1.25	-0.475	5.31			-1.93	5.35	2.35	4.92	2.91
-0.693	0.619	-0.0312	-0.0522	1.06			0.0755	-0.586	0.64	-0.149	6.61			-1.95	4.76	1.61	6.61	4.27
-0.857	0.9	-0.0986	0.648	-0.023			0.519	-0.586	0.594	-0.432	6.51			-2.19	4.11	0.912	6.38	3.91
-1.41	1.27	-0.0327	-0.839	0.585			2.49	-0.424	1.05	-0.895	6.24			-2.12	2.71	-0.607	6.84	2.37
-1.1	-0.076	-0.682	-1.2	-0.34			2.02	-0.211	-0.0952	0.36	4.18			-1.7	2.41	-0.459	7.01	3.14
-0.888	0.366	-1.66	-1.08	3.84			1.27	-0.0483	1.07	-0.576	4.24			-1.48	3.75	-0.0881	5.41	3.44
-1.04	1.87	-1.23	-0.456	2.27			1.58	0.352	1.17	-1.33	4.93			-1.6	4.16	-0.202	3.91	2.12
-1.09	1.58	-0.727	0.0986	-0.443			1.17	-0.47	1.39	-0.688	5.76			-1.36	3.58	0.155	4.75	2.77
-1.4	1.63	-0.697	-0.906	0.965			0.526	0.154	0.785	1.3	4.06			-1.57	4.38	0.548	6.27	2.28
-1.45	1.31	0.406	-1.13	-0.484			1.29	-0.116	0.686	0.531	4.36			-1.4	4.91	0.148	5.18	2.52
-1.33	1.17	-0.114	-1.15	-0.255			1.63	0.648	-0.317	0.81	3.28			-1.82	4.92	0.123	6.79	1.94
-1.26	0.999	-0.445	-1.19	0.583			1.02	0.313	0.675	1.47	4.29			-1.67	3.73	-0.729	6.17	2.92
-1.54	-0.378	-0.632	0.212	-0.153			0.8	-0.421	-0.939	1.37	6.38			-1.37	3.38	-0.578	5.3	3.05
-1.61	-0.158	-0.000777	-1.17	-0.44			0.75	0.582	-0.408	1.92	4.03			-0.178	3.79	0.0998	3.4	2.3
-1.48	0.945	-0.699	-1.35	-1.27			0.693	-0.612	0.547	1.76	3.52			2.15	4.29	-0.165	2.97	2.6
-1.53	0.715	-1.2	-1.61	-0.547			0.313	0.0552	-0.541	1.62	3.46			2.53	1.74	0.455	4.37	2.7
-1.5	-0.561	-0.46	-0.823	-0.661			0.369	0.477	0.0205	0.756	4.64			2.12	2.76	0.0632	4.8	2.83
-1.72	0.0648	2.03	-1.12	-0.69			0.703	-0.501	0.611	0.678	3.86			2.45	2.6	0.0741	4.62	1.67
-1.98	0.167	2.44	-0.799	-1.59			2.34	0.518	1.23	0.926	4.87			2.43	1.74	0.748	5.91	1.45
-1.75	0.314	2.03	-1.46	-1.02			4.94	0.68	-0.582	1.07	3.1			2.65	2.53	1.83	5.87	2.36
-1.55	-0.444	0.985	-1.09	-0.914			5.9	0.508	-1.61	1.24	3.63			2.51	3.03	1.56	4.1	2.87
-1.58	0.331	0.997	1.05	0.263			5.63	-0.0507	-0.633	-0.176	3.92			2.7	1.93	1.03	4.85	2.12
-0.963	1.14	0.89	0.925	-0.655			4.08	-0.0717	-1.38	-0.103	1.39			2.93	2.31	0.271	3.78	2.1
-1.46	0.665	1.2	0.164	-1.47			4.08	1.48	-1.44	0.727	2.49			3.09	2.86	-0.249	5.49	2.79
-1.24	0.321	1.41	0.386	-1.56			3.63	1.34	-1.8	0.631	1.62			3.3	3.83	-0.876	3.79	1.72
-1.43	1.17	0.913	-0.705	0.583			2.73	2.74	0.187	-0.22	2.16			3.2	3.72	-0.892	6.19	2.18
-1.16	2.25	0.51	0.358	1.43			3.01	3.36	-0.656	-0.452	0.558			2.84	3.58	-0.143	4.82	1.9
-1.23	0.577	0.418	0.822	-0.0513			2.89	3.01	-1.17	-0.366	1.36			3.73	2.12	-0.236	3.47	2.74
-0.754	0.717	-0.927	0.0382	-1.47			3.19	2.91	-1.02	0.0143	1.77			3.94	2.35	-0.116	4.56	1.78
-1.09	2.18	-0.387	0.205	-1.37			3.71	2.8	-1.09	-0.632	1.64			3.82	2.99	0.422	3.42	2.31
-0.552	1.78	0.0886	-0.0998	-1.25			4.84	0.896	0.19	-0.729	0.498			3.39	2.71	0.276	4.41	1.55
-0.951	0.929	-0.963	1.85	-0.456			4.86	2.85	-0.57	-0.36	1.51			2.82	3.63	0.401	3.95	0.339
-0.395	-0.345	1.05	0.537	-0.965			4.35	2.27	-0.686	-0.682	1.4			2.56	2.66	-0.973	4.98	2.09
-0.776	0.503	-0.435	1.81	0.689			3.35	1.9	0.629	-0.42	0.928			1.8	2.01	0.109	4.46	1.8
-0.916	0.137	0.419	0.328	-0.505			2.55	1.65	2.24	-1.81	2.51			1.77	1.74	-1.15	5.98	2.09
-1.23	0.356	-0.261	0.513	-1			2.48	2.35	2.19	-2.3	1.22			1.35	2.31	-0.968	5.2	2.27
-1.14	0.255	-0.345	1	-1.01			1.74	2.47	1.2	-0.267	1.71			1.45	2.98	-0.828	5.87	1.58
-1.19	-0.169	0.884	-0.101	-1.77			1.65	3.16	0.794	-0.0566	2.14			2.09	1.97	-0.803	4.92	0.429
-0.717	-1.02	0.52	0.916	-2.13			2.52	2.03	0.575	-1.33	0.416			1.89	2.12	-0.642	5.84	0.413
-0.729	-0.294	0.168	-0.847	-1.61			1.86	1.26	-0.369	-1.14	1.78			1.42	2.87	-0.22	6.13	1.5
-1.14	-0.774	0.524	0.719	-2.04			2.75	1.6	-2.03	0.18	1.95			1.14	3.34	0.319	6.38	1.72
-0.705	0.148	-0.144	0.45	-0.638			3.87	2.19	-1.61	0.738	0.582			1.78	2.75	-0.47	6.12	1.03
-0.661	1.19	0.119	-0.0111	-1.01			3.32	2.13	0.298	0.58	0.577			1.43	4.39	-1.31	4.63	-0.135
-0.765	0.0112	1.3	-0.503	-1.27			2.91	2.22	0.162	0.264	1.28			2.08	4.12	-0.795	5.24	0.754
-0.482	0.938	0.654	0.106	-1.09			2.52	2.04	-0.688	-0.418	1.79			2.36	2.96	1.35	5.88	0.874
-0.749	0.281	0.581	1.21	-1.41			3.34	1.09	-1.37	0.359	2.75			1.91	3.73	0.227	3.79	1.05
-0.733	-0.292	0.547	0.971	0.173			3.63	-0.0972	-1.18	0.00868	3.26			1.65	2.91	1.1	4.7	1.15
-0.621	-0.19	-0.875	0.939	-0.711			2.94	0.0686	-1.29	-1.94	2.66			1.57	2.37	-0.00259	3.95	1.63
-0.405	-0.291	-0.482	1.52	-0.552			3.42	1.64	0.0581	-0.967	3.86			1.16	2.51	-0.786	5.33	0.211
-0.998	2.29	0.093	-0.276	-0.476			2.77	0.22	-0.0963	-0.424	4.44			1.3	2.73	-1.79	5.28	0.0257
-0.862	0.807	0.311	-0.878	-0.077			2.75	0.631	-0.072	-1.16	5.57			0.625	1.88	-1.4	5.19	0.442
-0.988	0.972	-0.779	-0.0946	-0.493			1.9	0.868	0.226	0.0968	5.8			0.67	2.55	-1.33	4.7	-0.928
-0.98	0.428	-0.571	0.103	0.146			2.34	0.0486	-0.629	-0.538	6.16			0.363	2.39	-2.36	6.07	0.505
-0.0295	0.337	-0.62	0.754	0.838			1.52	0.419	-0.655	-0.839	5.37			0.267	1.89	-1.43	5.02	-0.661
-0.201	-0.0259	-0.277	0.388	1.53			1.68	0.262	-1.82	-0.859	4.86			0.206	1.99	-0.869	4.24	-0.0931
-0.0417	-0.101	0.643	0.779	1.97			2.34	1.11	-2.43	-0.514	5.48			0.368	1.89	-1.12	5.32	-0.304
-0.491	0.944	1.54	0.547	-0.328			1.79	0.43	-2.1	-0.95	5.95			0.614	2.71	0.708	4.91	0.285
0.0825	1.36	0.837	0.327	0.472			1.53	0.858	-2.7	0.38	5.62			0.795	3.09	0.659	5.48	-0.295
0.153	2.5	1.02	0.797	0.18			2.99	0.902	0.32	0.225	4.24			0.542	2.72	0.252	4.98	0.208
0.242	1.13	0.297	-0.19	-2.29			2.83	0.586	5.52	-0.348	4.24			0.588	4.03	0.597	6.98	1.23
-0.0561	-0.233	-0.0295	-0.164	-0.645			2.82	0.0138	5.62	-1.09	3.68			0.189	3.33	0.857	4.78	-0.206
0.0902	1.22	0.144	-2.09	-1			3.02	1.45	5.79	0.105	3.3			0.325	2.81	1.33	4.86	0.801
-0.11	0.697	-0.783	0.278	0.191			3.57	2.39	4.1	-0.731	3.8			0.237	2.95	2.11	5.4	-0.306
0.0945	2.42	-0.602	-0.806	2.16			2.88	2.59	3.33	-1.88	4.4			0.356	1.82	0.707	5.52	-0.381
-0.283	1.85	-0.745	-0.387	1.75			2.72	1.57	2.31	-0.656	3.24			-0.101	2.27	2.03	5.4	0.576
-0.225	0.0811	-0.654	-0.176	1.41			2.13	1.38	3.23	-2.13	2.56			0.0824	1.92	2.03	3.57	1.57
-0.344	0.308	-0.926	-0.705	1.92			1.67	2.09	2.18	-1.24	1.81			0.0693	1.11	0.364	6.06	1.53
-0.569	0.183	-1.86	-1.52	-0.127			1.48	3.68	3.64	-1.33	3.29			0.25	2.07	0.57	6.32	1.8
-0.53	0.092	-1.35	-1.07	0.31			0.985	3.95	1.64	-1.99	2.66			-0.09	1.94	-0.403	5.5	1.51
-0.764	-0.962	-0.877	-1.15	1.39			0.661	2.6	1.63	0.241	2.21			-0.0823	3.12	-0.393	6.61	1.28
-0.653	-0.526	-1.61	-1.38	2.12			0.154	2.67	0.799	0.301	1.27			-0.033	1.96	-2.11	5.49	1.62
-0.634	-0.0561	-1.38	-1.22	0.92			0.209	2.17	1.04	-0.855	2.24			0.0235	2.17	-0.985	4.74	-0.0362
-0.958	-0.0626	-0.749	-0.93	1.06			0.49	1.91	4.97	-0.767	2.29			-0.0803	2.46	-2.15	4.14	-0.754
-0.868	0.087	-0.637	-0.862	0.741			0.986	3.57	4.47	-0.279	4.47			0.302	1.9	-1.95	5.81	0.135
-0.961	-1.06	-0.00219	-1.71	-0.14			0.913	2.51	7.45	-0.778	3.74			0.275	2.67	-1.61	5.07	0.705
-0.961	-0.216	-0.98	0.0886	0.815			1.33	2.29	8.07	-0.305	2.6			0.0485	2.49	0.115	5.47	0.552
-1.06	0.86	-1.26	-0.0312	1.97			0.987	2.34	6.11	-1.06	2.07			-0.142	2.11	1.93	5.26	0.127
-1.54	0.939	-0.965	0.03	1.07			0.568	1.6	4.98	-0.307	2.44			0.0564	2.34	2.28	4.78	0.187
-1.06	0.623	-1.59	-0.722	0.00861			0.363	0.236	4.58	-1.81	2.71			0.26	2.26	2.14	5.35	-0.142
-1.17	0.895	-1.26	-0.781	-0.0312			1.23	2.23	3.33	-0.907	1.68			0.294	1.95	2.13	4.97	0.282
-1.94	0.0437	-0.482	-0.713	-1.09			1.93	1.9	2.17	-1.01	1.91			0.0758	0.992	0.663	4.99	2.01
-1.63	-0.0776	0.0686	-0.0368	-0.419			0.888	1.88	1.69	-0.861	1.55			0.129	1.79	-0.903	4.97	1.72
-1.69	0.249	0.314	-0.332	-0.627			1.07	0.614	1.23	-0.394	0.467			0.14	1.41	-0.21	5.28	0.66
-1.37	0.196	0.607	-2.46	-0.76			0.834	0.0939	1.38	-1.86	1.51			0.249	2.69	-1.43	5.65	1.15
-1.1	0.555	-0.932	-1.55	0.626			0.138	0.133	0.678	-0.669	1.81			-0.0183	2.51	-0.745	7.07	-0.304
-1.69	1.05	-0.785	-0.993	-0.847			-0.0838	0.673	-0.313	-1.54	1.96			-0.259	1.91	-2.26	4.5	-0.677
-1.43	2.42	-0.821	-0.695	1.2			0.123	-0.0428	-0.022	-0.567	0.697			-0.118	3.35	-2.47	4.33	1.4
-1.62	1.15	-0.899	-0.171	-0.277			0.427	-0.13	0.501	-1.35	3.79			-0.0133	0.738	-2.32	4.93	2
-1.62	1.27	-0.568	-1.87	-0.501			0.409	0.376	0.043	-0.572	2.23			-0.224	2.43	-2.73	6.47	0.14
-1.62	1.12	0.541	-0.96	0.269			0.51	0.432	0.189	-1.31	1.71			-0.103	1.84	-2.46	4.73	2.21
-1.84	2.15	0.518	-1.16	-1.8			0.709	-0.768	0.233	-0.123	2.42			-0.16	1.69	-1.19	4.57	0.845
-1.99	3.29	-0.835	-1.81	-1.72			0.213	0.634	0.383	-0.642	1.38			-0.0208	0.952	-3.39	3.46	0.661
-1.69	3.72	0.98	-1.63	-1.99			0.563	1.13	-0.0437	-2.12	0.958			-0.256	1.59	-4.61	4.83	0.327
-1.79	2.69	0.783	-0.932	-1.16			1.14	2.53	0.839	-1.05	0.256			-0.146	1.64	-3.51	4.17	0.644
-1.89	2.06	1.23	-0.583	-0.491			0.491	2.49	0.203	-2.33	0.742			0.332	2.59	-4.13	3.53	-0.00342
-1.56	1.74	1.77	0.526	-1.08			0.945	0.461	0.202	0.533	1.27			0.403	2.7	-4.42	2.65	-0.922
-1.92	1.19	0.923	-1.08	-1.66			1.18	1.25	0.625	-1.59	0.014			0.153	2.71	-3.44	3.55	-0.468
-1.6	2.5	-0.033	-0.338	-1.52			1.21	0.871	0.251	-0.338	-0.698			0.662	1.92	-3.53	4.73	0.0666
-1.49	2.13	-0.912	-0.478	-1.12			0.75	0.614	-0.602	-1.51	0.767			0.311	3.32	-2.67	4.46	-0.736
-1.45	1.34	-0.289	-1.52	-2.61			0.842	-0.0198	-0.486	-2.29	1.7			0.106	2.12	-1.18	5.2	-0.396
-1.42	0.353	-0.396	0.302	-1.51			0.253	-0.0978	1.32	-1.59	2.13			-0.019	2.15	-0.788	3.61	0.725
-1.35	0.282	-0.761	0.586	-0.189			0.765	-0.546	0.688	-1.38	3.57			0.0716	1.42	-0.432	4.13	0.362
-0.712	0.0864	-0.474	-0.395	-0.8			0.973	-1.21	0.431	-2.26	1.16			-0.039	2.24	-0.0122	3.09	-0.968
-0.791	-0.768	-0.971	-0.146	0.7			1.6	-0.132	-0.265	-1.09	2.53			-0.69	2.86	0.164	5.06	-0.283
-0.212	0.218	-1.46	-0.987	-0.807			1.33	0.676	1.01	-1.59	2.26			-0.412	2.89	0.26	3.98	0.979
-0.163	0.107	-0.209	-1.29	-0.0423			2.31	0.619	1.61	-1.76	1.26			-0.603	4.17	-0.237	4.61	0.926
-0.294	-1.79	-0.336	0.969	0.0574			2.21	0.5	0.437	-1.93	1.18			-0.312	3.83	0.582	3.54	0.655
-0.548	-0.691	-1.19	-0.0989	-0.899			1.61	2.06	0.68	-1.42	1.4			0.21	4.42	-0.165	4.51	2.09
-0.559	-1.64	-2.17	0.977	-0.732			1.63	0.921	0.607	-2.35	1.6			-0.0263	3.12	0.642	4.71	2.08
-0.494	-1.29	-1.84	-0.0519	-0.223			1.67	1.08	-0.469	-1.94	1.79			0.056	2.8	-0.243	3.56	2.07
-0.284	0.165	-1.26	-1.9	0.561			1.78	0.107	0.154	-2.86	1.14			0.0466	2.37	0.843	2.46	2.56
-0.607	-0.319	-1.42	-0.834	0.433			1.75	1.38	-0.787	-2.04	0.634			-0.174	1.44	0.835	3.58	2.69
-0.586	0.0522	-1.09	-0.45	-1.19			2.1	0.302	0.263	-2.25	-0.149			-0.861	1.94	-0.361	3.77	2.55
-0.333	-2.38	-1.32	-0.177	-0.766			2.09	0.357	0.156	-2	-0.332			-0.494	1.45	-1.12	4.43	2.01
-0.858	-1.82	-0.407	-0.166	0.0854			2.39	0.134	0.815	-2.97	-0.241			-0.19	1.87	-1.07	3.07	1.56
-0.639	-1.08	0.729	0.452	0.0213			2.07	-0.126	1.52	-1.77	0.618			0.0133	1.43	-0.906	3.2	0.587
-1.11	-0.702	0.0535	0.307	-1.41			1.43	0.476	2.44	-1.54	1.68			0.423	1.77	-0.245	3.12	0.826
-0.904	-0.589	-0.117	-1.97	-1.75			1.68	-0.83	2.99	-1.92	0.748			0.63	0.811	1.85	2.48	1.72
-0.578	-1.47	-1.13	-1.11	-1.02			1.36	-0.325	3.68	-1.79	1.61			0.841	2.3	1.22	3.16	0.802
-0.761	-1.11	-1.32	-2.15	0.0108			1.33	0.0647	2.95	-1.97	0.83			1.1	2.65	-1.1	2.05	-0.245
-1.02	-1.42	-1.13	-0.609	-1.16			1.67	-0.424	2.35	-3.07	1.53			0.617	2.25	-0.19	2.39	0.403
-0.841	-0.975	-0.499	-1.4	-2.26			1.96	-0.771	1.55	-2.52	-2.13			-0.197	1.78	0.448	1.93	0.18
-0.979	-1.07	-0.576	-0.0299	-1.66			1.27	-0.723	2.08	-1.32	0.607			-0.0882	0.852	0.0115	3.04	0.0761
-0.597	-0.482	-0.59	0.49	-0.659			0.911	-0.346	2.73	-1.56	1.2			-0.43	1.75	-1.51	3.59	0.203
-0.823	-1.19	-1.54	-0.978	-2.07			0.617	-0.0404	2.34	-1.13	1.55			-1.13	1.9	0.232	4	0.578
-1.23	-0.65	-1.21	-1.4	-1.26			1.08	-0.133	0.849	-1.29	2.8			-1.14	2.17	-1.17	2.36	-1.32
-0.489	-1.49	-0.696	-0.522	-1.59			1.49	-0.338	0.989	-1.68	2.64			-0.866	2.42	-1.24	3.74	0.801
-0.49	-2.24	-0.276	-0.813	-1.28			2.37	-0.0988	0.886	-1.25	1.79			-0.451	2.39	1.2	2.23	1.25
-0.377	-0.613	0.271	-0.826	-0.0544			2.21	-0.129	1.03	-1.06	1.64			0.772	2.33	-0.42	2.04	1.75
-0.246	0.0092	0.447	-1.17	0.241			1.94	-0.165	0.608	-0.54	1.81			0.692	2.14	-0.551	1.4	1.53
-0.513	1.27	-0.231	-0.0772	-1.66			0.415	1.2	0.705	0.857	1.33			0.877	0.97	-0.708	1.36	1.64
-0.303	1.7	0.0778	-1.36	-0.982			-0.161	1.2	1.51	-0.0662	2.03			0.423	1.1	0.118	2.87	1.46
-0.23	0.0551	-0.112	-1.34	-0.412			0.56	0.628	1.97	0.505	0.519			0.174	1.2	0.711	2.05	1.6
-0.818	0.717	-0.845	-0.784	0.0316			2.17	1.77	3.37	0.754	1.95			-0.6	1.05	1.34	3.16	2.64
-0.445	-0.201	0.186	-0.323	-0.38			2.26	0.978	2.18	-0.509	0.0129			-0.298	0.685	1.86	3.03	2.22
-0.238	-0.535	1.23	-1.44	1.69			2.46	0.963	2.35	-0.427	-1.59			-0.457	1.74	0.921	0.835	2.3
-0.116	-0.605	1.63	-0.591	-0.162			1.89	1.47	1.68	-1.49	0.206			-0.305	0.882	0.87	0.412	1.93
-0.126	0.783	1.59	1.08	2.06			1.68	-0.401	2.28	-2.24	1.49			-0.558	2.13	0.999	1.49	1.62
-0.558	1.82	0.922	-0.427	1.9			1.16	-0.881	1.8	-0.672	0.466			-0.589	1.91	-0.0702	2	2.25
-0.576	3.95	0.221	-1.5	0.861			0.934	0.0549	3.48	-0.205	1.04			-1.47	1.86	-0.303	1.56	1.79
-0.188	3.11	0.172	-2.18	1.19			0.475	-0.758	3.5	-0.789	-0.253			-1.43	2.54	0.366	2.81	1.55
-0.16	2.6	-0.0757	-2.33	3.02			0.858	1.33	1.89	-1.67	2.53			-1.29	3.77	-0.523	1.95	1.15
-0.059	1.64	0.121	-0.624	1.71			1.18	2.06	0.983	-2.03	-0.982			-1.96	2.71	-0.937	0.228	2.06
-0.665	-0.0432	0.509	-0.0292	2.28			0.469	1.75	0.608	-0.739	0.0627			-1.79	2.93	-0.605	1.35	0.0451
-0.61	0.211	0.637	-0.935	1.54			-0.0295	0.943	3.58	-1.23	-0.526			-1.55	2.44	-1.13	1.09	-0.478
-0.773	1.14	0.85	0.00884	1.28			-0.439	0.4	4.62	-0.768	1.37			-2.08	1.75	-1.33	3.66	-0.566
-0.853	1.32	-0.481	-1.87	2.33			-0.616	1.11	3.58	-1.77	0.747			-2.49	1.6	-1.68	1.58	-0.229
-0.894	1.8	0.68	-1.98	1.45			-0.998	-1.06	4.25	-1.73	-1.41			-2.13	1.38	-1.9	1.46	-0.831
-1.52	0.708	0.942	0.167	0.895			-0.859	-0.45	3.85	-0.898	-0.268			-1.16	1.66	0.164	3.11	1.01
-1.42	1.39	0.551	-0.735	0.129			-0.59	-1.04	3.3	-1.59	3.11			-0.603	0.453	-1.89	3.13	1.93
-1.65	0.106	0.392	-0.192	0.0469			-0.605	-0.0413	3.2	-1.09	1.73			-0.462	0.776	-0.848	1.61	0.803
-1.07	0.107	1.35	-0.041	0.59			-0.462	-0.00143	2.51	-1.03	2.3			-0.506	1.38	-1.38	3.14	1.94
-1.12	-1.09	3.41	1.05	0.737			-0.201	0.724	1.51	0.2	3.51			-0.168	1.81	-0.808	3.07	1.03
-1.41	-0.24	3.45	-1.35	0.645			-0.237	0.817	1.07	-0.498	1.8			-0.00266	1.61	-0.0805	1.69	0.668
-1.52	0.32	4.22	0.627	1.33			-0.784	-0.376	0.506	-1.22	1.43			-0.0162	1.49	-0.132	3.76	1.36
-1.45	0.487	3.5	0.0768	0.229			-0.58	-0.147	-0.452	-0.471	-0.403			0.0817	2.33	-1.17	0.928	1.04
-1.04	0.853	4.01	-0.256	-0.589			0.577	0.0188	-0.243	-1.45	1.3			0.471	1.02	-0.348	0.05	0.32
-1.31	0.00401	3.49	-0.367	-0.905			0.983	0.816	-0.0906	-1.73	1.78			0.175	1.42	0.7	1.6	-0.529
-1.38	1.97	2.61	0.699	-1.46			0.0353	-0.2	0.407	-1.44	3.62			0.231	2.15	1.52	1.87	0.567
-1.48	-0.98	2.95	-1.1	-0.454			-0.112	-1.55	-0.859	-0.548	2.88			0.174	1.44	3.11	0.666	1.05
-1.41	0.514	1.3	1.35	0.101			1.18	0.243	2.54	-0.0574	3.64			-0.0206	1.21	2.2	1.92	1.48
-1.6	1.87	1.16	-1.3	-0.821			1.37	0.796	2.5	-1.39	1.81			-0.14	1.42	3.35	-0.274	0.332
-1.5	0.685	0.697	0.502	-0.906			0.971	0.945	2.49	-2.05	4.2			0.13	1.05	2.16	1.63	1.89
-1.53	0.5	0.606	-0.976	-1.34			1.53	1.64	1.06	-0.58	1.88			-0.059	1.13	2.11	0.473	2.04
-1.16	1.29	0.649	-0.111	-0.548			1.49	2.8	1.33	-1.74	2.1			0.416	2.07	1.83	0.948	2.41
-0.174	0.0626	1.14	-0.878	-0.731			0.99	0.432	0.999	-1.7	0.892			0.587	2.13	2.86	0.0313	1.66
-0.969	0.271	1.03	-0.485	-0.805			0.615	1.23	0.57	-1.65	-0.2			0.578	0.682	4.17	3.13	1.79
-0.832	-0.32	1.82	-0.14	-0.877			0.532	1.7	-0.148	-1.04	0.215			-0.03	0.113	3.83	0.359	2.49
-0.729	-1.14	0.801	1.34	-2.01			1.02	1.35	0.894	-0.793	1.52			-0.894	0.357	3.71	1.75	0.963
-1.12	-1.05	1.26	1.64	-0.687			0.714	1.02	-0.329	-1.21	2.24			-0.806	0.757	2.62	2.23	3.33
-1.08	-1.41	0.581	1.25	-1.21			0.00984	0.107	-1.47	-2.01	0.871			-0.764	0.82	1.05	0.719	3.63
-1.3	-0.89	0.985	0.771	-1.18			-0.0529	-0.425	-1.27	-0.938	0.654			-1.2	0.444	0.906	2.63	3.69
-0.985	0.247	0.879	0.886	-1.82			0.0249	0.321	0.66	-0.344	1.71			-0.556	0.574	0.0636	2.59	3.82
-1.38	-0.493	0.466	0.45	-1.44			0.938	-0.0011	0.0203	0.781	2.95			-0.806	0.518	0.857	3.67	3.66
-0.802	0.431	0.649	1.19	-1.48			2.58	0.114	1.14	-0.399	1.13			-1.74	1.49	1.98	1.89	2.77
-0.747	-0.905	-0.329	0.825	-0.826			3.69	0.927	0.411	-1.8	-0.264			-1.8	1.3	2.46	1.09	2.12
-1.1	-0.705	0.241	1.18	-1.61			3.67	1.62	-0.517	-1.21	0.308			-1.48	1.91	2.75	1.99	3.03
-1.28	-2.13	1.1	1.12	-0.3			4.7	1.31	-0.695	-1.7	0.0968			-1.88	1.26	3.64	3.28	2.88
-1.55	-1.62	-0.203	2.52	-2.04			4.09	-0.0303	-0.762	-1.82	0.753			-1.72	1.81	4.11	3.64	4.12
-1.06	-1.3	-1.03	1.42	-2.59			3.63	-0.0685	-0.778	-1.88	0.603			-1.26	0.744	4.03	2.04	2.33
-0.999	-0.535	-1.49	0.875	-1.69			3.36	0.647	0.214	-2.33	0.889			-1.27	0.882	2.68	3.71	2.14
-0.151	-0.499	-1.33	1.7	-1.54			3.37	1.1	0.727	-2.09	1.07			-1.44	-0.098	1.34	2.24	1.19
-0.473	0.678	-1.02	0.0878	-3.25			3.01	1.35	2.34	-2.63	0.125			-1.62	0.0168	1.58	2.47	0.584
-0.447	-0.0529	-1.97	1.76	-0.541			2.68	0.597	1.45	-2.49	0.597			-1.91	-0.729	0.312	2.14	1.94
-0.774	-0.869	-1.2	0.829	-1.1			3.54	1.26	2.66	-2.13	0.567			-2.06	-0.936	-0.263	3.18	1.72
-0.962	-0.304	-0.663	1.18	-0.321			2.79	1.66	1.15	-3.07	-1.07			-2.45	0.145	-0.445	1.74	1.41
-0.398	-0.673	-1.43	1.52	-0.0564			2.67	0.817	0.954	-0.57	-0.061			-2.16	-0.504	0.0114	3.7	-0.577
-0.554	-0.394	-0.474	0.255	0.091			2.28	0.802	1.01	-2.03	0.539			-1.76	0.235	0.0454	3.09	0.148
-0.776	0.0798	-1.11	0.743	-1.01			1.46	1.51	-0.363	-1.45	-0.374			-1.61	-0.31	-0.194	4.66	-0.379
-1.08	-1.53	-0.493	1.86	-1.02			0.84	0.272	0.0394	-0.849	0.606			-1.74	1.12	-0.0577	5.02	0.647
-1.08	-0.913	-2.55	-0.913	-0.702			2.17	0.988	0.902	-2.62	-0.902			-1.59	1.33	0.0794	4.22	1.38
-0.893	-0.301	-1.98	0.995	-0.985			2.52	1.18	1.25	-1.53	0.408			-1.41	2.26	0.474	2.65	0.744
-0.937	-1.31	-2.92	0.659	-0.888			1.48	1.78	1.67	-0.849	1.28			-1.33	1.46	2	3.86	0.205
-1.41	-0.343	-1.95	1.82	-0.235			1.33	1.02	0.696	-2.34	0.58			-1.03	1.81	1.88	3.06	0.662
-1.17	-0.673	-2	0.839	-1.21			0.927	-0.235	-0.324	-1.56	-0.334			-0.313	1.68	1	4.73	1.12
-1.76	-0.255	-2.22	-0.644	-0.374			0.918	-0.732	-0.813	-2.42	-0.835			-0.0762	2.05	0.885	3.76	0.512
-1.72	-0.264	-1.16	-0.0917	-0.416			0.438	-1.34	-2.26	-2.44	-1.68			-0.025	1.11	0.967	2.97	1.56
-1.38	-1.09	-0.955	-0.913	-0.226			0.867	-0.746	-2.25	-0.916	0.405			-0.0294	1.77	1.47	-0.451	1.39
-1.86	-0.759	-1.31	-0.9	-1.23			1.54	-1.55	-0.689	-1.18	1.74			-0.171	1.55	-0.0805	1.02	1.41
-1.86	-0.0192	-2.08	0.688	-1.26			1.68	-0.649	-0.372	-0.291	0.903			-0.498	-0.101	-0.427	2.77	0.173
-1.71	0.717	-1.49	2.07	-0.263			0.968	-0.395	-0.946	-2.11	1.02			-0.374	0.384	1.48	3.07	-0.34
-1.19	1.19	-0.923	0.681	0.147			1.31	-0.452	-1.35	-0.676	0.698			-0.813	0.64	0.729	1.54	0.764
0.108	0.668	0.208	0.606	-0.307			1.72	0.569	-1.51	0.208	0.245			-1.06	0.886	1.3	0.589	0.198
0.387	0.0825	1.58	-0.231	-1.5			0.908	-0.509	-2.77	-0.906	0.328			-1.19	0.933	1.13	2	1.36
0.147	-0.28	1.05	-3.46	-0.974			0.482	0.177	-1.59	-2.8	1.64			-1.43	0.525	0.874	1.02	1.21
0.174	-1.74	-0.454	-0.801	-1.87			0.668	0.056	-1.75	-0.967	1.52			-1.5	0.618	1.82	2.21	1.59
-0.0994	0.823	-1.1	0.572	-0.809			0.657	-0.297	-1.1	-1.58	-1.11			-2.18	0.117	0.115	0.886	2.82
-0.37	-1.58	-0.669	-0.623	-1.97			0.102	0.954	-1.25	-1.46	-0.0607			-2.71	-0.198	-0.709	1.53	1.9
-0.49	-0.596	1.24	0.42	-2.22			0.487	-0.328	-1.78	-2.46	-1.82			-2.74	-0.46	-0.71	0.91	0.567
-0.603	-1.91	1.85	0.387	-1.35			0.196	-1.32	-1.51	-2.45	0.292			-2.04	0.821	-0.313	0.777	1.02
-0.197	-0.669	1.29	0.42	-1.4			0.148	-0.802	-1.87	-2.38	-0.858			-2.31	1.04	-0.341	0.599	0.0385
-0.383	-2.47	1.08	-0.233	-1.56			0.288	-2.07	-1.52	-1.85	0.761			-2.3	0.525	-0.28	1.54	-0.247
-0.283	-1.34	0.0118	0.481	-2.45			0.136	-2.02	-1.66	-2.16	-0.572			-1.76	-0.0315	1.36	2.33	0.66
-0.288	-1.38	-0.405	0.914	-1.36			0.504	-1.32	-1.82	-1.37	-0.223			-1.34	1.47	3	1.64	0.964
-0.0837	-1.78	-0.194	0.0117	-1.83			0.627	-1.14	-1.27	-2.61	-0.123			-0.977	0.719	1.41	1.29	1.24
-0.311	-0.317	-0.506	0.244	-0.765			1.04	-3.65	-1.09	-2.02	-1.07			-1.37	0.782	1.07	0.496	0.617
0.477	-1.11	-0.194	-1.17	-1.06			1.23	-2.44	-0.0667	-2.88	-0.833			-1.45	0.43	0.755	1.87	-0.0909
0.241	-1.17	0.585	-0.729	-0.966			1.65	-1.17	-0.589	-2.34	-0.499			-1.09	-0.463	-0.219	-0.506	-0.517
0.294	-0.935	0.161	1.69	-1.43			0.798	-1.63	0.935	-2.64	-1.7			-0.908	0.592	0.0636	0.631	-0.249
0.119	-0.924	0.0113	0.457	-1.9			0.643	-1.01	0.853	-2.04	-0.647			-1.47	-0.186	0.145	-0.159	0.269
-0.796	-0.289	-1.03	0.791	-1.84			0.838	-1.25	1.75	-2.13	-1.22			-1.66	0.932	-0.614	1.25	0.0711
-0.917	-0.352	0.132	-0.122	-1.06			1.14	-0.969	2.09	-2.24	-1.8			-1.04	1.1	-0.286	-0.0161	0.0145
-1.1	-0.645	0.565	-0.797	-1.57			1.04	-0.828	1.76	-2.04	0.000879			-1.19	0.992	1.78	0.881	0.0754
-0.528	-0.265	-0.68	0.638	-1.7			0.719	-0.85	0.906	-2.07	-3.74			-0.741	1.98	2.41	0.45	0.16
-0.619	-1.44	-0.325	-0.463	-1.2			0.889	-0.723	1.91	-2.11	0.385			-1.08	1.73	1.74	0.193	1.29
-0.806	-1.6	-0.249	-1.55	-1.1			0.498	-0.655	0.762	-2.54	-1.35			-1.48	0.445	2.18	0.508	0.903
-0.686	-3.51	-2.05	-1.48	-0.256			0.268	-1.33	0.0478	-2.57	-0.887			-1.68	0.0373	0.971	1.66	1.24
-0.884	-2.56	-0.741	-1.32	-0.685			-0.335	-1.11	0.544	-1.77	-0.047			-1.73	0.994	1.47	1.42	1.49
-0.97	-1.42	-1.35	0.345	-0.832			-0.241	-0.746	1.97	-1.73	-1.16			-1.22	0.566	0.612	1.02	2.01
-0.631	-0.768	-0.507	0.51	-0.99			-0.317	-1.8	0.485	-1.56	-1.42			-1.29	-1.07	1.66	-0.621	0.324
-1.05	0.0748	-1.26	-0.305	-2.5			-0.466	-3.26	1.3	-2.59	-0.868			-1.28	-0.432	0.428	0.367	0.627
-1.28	1.15	-1.1	0.528	-2.14			-0.564	-1	1.83	-0.949	-0.633			-2.16	0.0454	0.109	0.937	0.298
-0.543	1.84	-1.29	-1.25	-0.625			0.113	-1.44	1.86	-1.57	0.118			-2.24	0.197	0.283	1.45	0.348
-1.11	2.5	-0.564	-0.439	-1.98			-0.0187	-0.139	2.62	-2.11	-0.0735			-2.13	0.505	-0.149	3.15	0.857
-0.159	0.454	-1.84	-1.14	-2.96			-0.502	-1.48	2.04	-1.64	-0.885			-2.47	0.425	1.18	2.19	0.708
0.0872	1.5	-0.119	-0.434	-2.07			0.0939	-0.896	2.46	-1.92	-1.31			-2.11	-0.542	2.76	2.19	0.689
-0.269	-0.341	0.3	-1.1	-1.48			-0.00752	0.878	2.43	-1.93	-0.652			-2.07	-0.0902	2.5	2.58	0.864
0.261	-0.37	-0.813	-2.32	-1.19			-0.545	-0.968	2.53	-0.0658	0.777			-2.14	1.35	2.65	2.87	0.859
0.142	-0.603	-0.704	-0.562	-0.768			-0.917	-0.301	2.59	-0.0521	0.393			-2.17	0.786	2.38	0.501	1.45
0.119	-0.476	-0.737	-1.24	-1.21			-0.453	0.35	1.98	0.466	0.14			-1.38	0.298	1.58	3.8	1.09
0.183	-0.196	-1.52	-1.51	-1.37			0.455	0.772	1.84	0.171	-0.686			-1.01	-0.0847	3.51	4.52	0.759
0.43	0.307	-2.07	-0.934	-1.54			-0.229	0.88	1.07	1.28	0.206			-0.276	0.998	2.21	2.16	0.642
0.598	-0.747	-1.11	0.211	-1.5			0.481	0.624	2.56	-0.633	0.484			0.241	1.57	1.46	1.73	1.39
0.58	-0.749	-1.69	-0.012	-1.33			1.21	1.01	0.464	-0.477	1.11			0.0299	0.671	1.91	0.919	2.15
0.0615	-0.157	-0.778	0.53	-1.97			1.13	0.674	0.062	-1.56	-1.45			-0.195	0.0715	2.61	2.57	1.03
0.0374	-0.31	-1.91	-0.166	-1.1			2.4	0.167	-0.967	-2.07	-1.21			-0.669	-0.21	1.23	3.06	1.36
-0.371	-0.677	-1.82	-0.00141	-1.1			3.11	0.69	2.05	-0.293	0.0134			-0.601	-0.296	0.499	2.7	0.429
-0.234	-0.474	-1.36	-1.22	-1.37			2.51	-0.318	0.565	-1.66	-0.915			-0.786	-0.57	0.964	2.27	0.88
-0.363	-0.642	-0.647	-0.705	-1.25			2.05	0.162	1.46	-0.403	-0.788			-0.742	0.241	0.69	2.35	1.48
-0.703	-0.0204	-2.13	-0.0464	-1.56			0.704	0.0292	2.08	-1.46	0.256			-0.766	0.24	2.17	2.29	2.14
-0.378	-0.29	-1.73	0.864	-1.79			0.404	-0.941	1.76	-1.85	-0.577			-1.01	0.367	2.09	0.73	2.57
-0.594	0.481	-2.41	-0.409	-2.21			1.09	0.682	0.0599	-1.05	0.461			-1.95	0.157	2.15	0.743	2.1
-0.937	0.407	-2.96	-0.218	-1.19			1.2	0.242	-0.535	-1.3	1.05			-1.98	0.429	1.88	2.25	2.93
-0.949	0.424	-0.874	-0.0586	-0.227			0.786	0.334	-2.33	-2.02	1.7			-1.73	0.192	2.72	2.18	2.25
-0.519	-0.672	-0.431	-0.811	-2.61			0.0877	0.412	-2.77	-2.1	-0.139			-1.8	0.366	2.16	3.7	1.73
-0.11	-1.19	0.797	0.489	-2.15			0.316	-0.131	-2.4	-1.23	-0.799			-1.6	0.129	2.44	2.15	2.14
1.18	1.25	-0.626	1.12	-2.48			0.101	-0.286	-1.72	-1.71	0.498			-0.724	0.225	1.73	0.795	2.51
0.695	-0.986	0.569	1.08	-1.59			0.236	0.519	-1.42	-0.217	-1.15			-0.596	-0.0673	2.79	1.21	1.77
0.896	-0.89	-1.27	0.532	-1.72			0.327	-0.103	-1.51	0.636	0.749			-0.933	-0.497	2.27	3.98	1.07
0.895	-0.478	-0.803	0.423	-0.597			0.729	0.614	-1.83	-0.259	-0.0576			-0.776	-0.621	5.05	2.22	1.27
0.0768	-1.33	-1.63	0.597	-0.889			1.49	0.674	-1.39	-0.541	0.685			0.766	0.447	4.65	2.13	1.81
-0.45	-1.07	-1.34	0.808	-1.31			2.25	-0.013	-2.51	-2.36	0.134			1.07	-0.466	4.14	3.07	1.43
-0.181	-1.56	-1.52	0.943	-0.961			2.11	-0.109	-1.9	-0.454	0.189			1.05	0.0718	3.88	1.64	0.975
-0.515	-1.09	-1.81	0.489	-1.83			2.06	0.434	-2.03	-0.958	-0.512			1.14	2.56	2.93	2.23	1.07
-0.426	-1.2	-1.85	0.525	-1.18			2.23	0.474	0.0986	0.214	-0.0091			1.51	1.27	3.36	0.44	0.363
-0.585	-0.999	-1.45	0.652	-2.28			2.03	0.014	0.602	-0.324	-1.19			0.402	3.25	1.97	0.62	0.274
-0.555	-1.57	-1.82	-1.6	-2.77			2.73	-1.02	0.902	-0.196	-1.11			0.117	2.19	2.18	1.28	0.508
-0.805	-1.46	-2.22	-0.491	-2.61			2.4	-0.954	-0.615	0.459	-0.86			0.00124	1.29	1.72	2.01	0.293
-0.207	-2.25	-2.07	-0.74	-1.54			2.1	-0.049	-0.685	-0.569	-1.2			0.31	0.893	1.14	2.11	-0.42
-1.27	-1.93	-1.72	-0.709	-2.44			3.18	-1.58	0.013	-2.84	-0.281			0.12	1.84	0.0983	2.54	-0.572
-1.05	-0.855	-2.72	-1.46	-2.65			2.82	0.205	1.06	-1.33	-1.4			0.228	1.64	0.364	0.59	-0.994
-0.747	-1.3	-1.5	-0.319	-1.37			1.8	0.0229	0.0868	-0.815	-1.51			0.302	1.01	1.53	2.13	-0.116
-1.02	0.0877	-2.06	-0.222	-2.2			1.01	0.679	1.24	0.143	-0.356			0.271	-0.236	0.263	2.79	-1.07
-1.37	0.451	-2.16	-0.929	-1.17			1.24	0.0137	1.5	-2.7	-1.05			0.82	-0.357	0.34	2.3	0.167
-1.27	0.299	-1.46	-1.09	-1.33			0.684	1.26	1.3	-1.82	1.23			1.48	0.281	0.645	3.53	0.67
-1.06	-0.911	-0.552	-1.59	-1.27			0.609	0.98	3.3	-1.65	-0.197			1.68	1.06	1.01	3.52	0.678
-0.258	0.676	-1.11	-1.4	-2.8			0.401	0.375	3.39	-1.21	-0.0398			1.28	2.15	1.2	2.46	0.804
-0.17	0.597	-1.05	-1.13	-0.996			0.889	-0.503	3.27	-0.409	-0.183			1.31	2.04	1.8	1.07	-0.676
0.053	-0.974	-0.493	-1.51	-2.03			1.69	0.763	1.17	-0.796	-1.46			1.4	2.45	0.567	0.766	-0.663
0.112	0.225	-0.58	-1.27	-1.13			1.67	-0.492	1.16	-1.17	-1.3			0.952	1.32	1.84	1.99	0.26
0.381	0.144	-1.15	-1.07	-2.24			1.63	0.667	0.345	-2.02	-2.29			1.03	0.988	3.76	1	-0.279
0.0955	1.12	-1.33	-0.303	-1.72			1.12	-2.03	1.56	-0.863	-1.44			1.18	0.24	2.21	2.12	0.96
-0.178	0.854	-1.93	-1.13	-1.35			0.582	-0.986	1.73	-2.3	-0.624			0.509	0.883	0.848	1.08	-0.0389
-0.0817	2.03	-1.31	-1.62	-1.79			0.409	-0.077	2.29	-1.64	0.729			0.127	0.846	1.66	1.3	0.0178
-0.752	0.99	-1.37	-1.46	-0.723			0.419	-0.676	2.49	-2.03	0.232			-0.857	0.365	3.89	-0.642	0.00231
-0.972	-0.275	-1.45	-0.577	-2.03			0.593	-0.82	2.27	-2.85	0.299			-0.912	1.26	2.47	0.158	0.623
-1.12	-0.12	-1.56	-0.388	-1.45			0.813	-0.313	1.74	-1.31	0.311			-0.387	0.627	1.73	0.411	0.699
-1.44	1.73	-1.24	0.138	-2.04			0.478	-0.316	2.32	-2.51	-2.02			-0.641	1.07	0.953	0.684	1.08
-1.14	0.366	-1.55	-1.31	-0.425			0.712	1.11	1.53	-1.94	-1.23			-0.142	1.48	1.11	0.462	1.46
-0.841	1.65	-1.58	-1.6	-0.591			0.769	0.343	2.59	-1.72	0.384			0.246	1.31	0.553	1.46	1.75
-0.651	-0.0215	-1.99	-1.81	0.289			-0.17	0.841	1.51	-2.47	-0.219			-0.078	1.37	0.236	-1.37	0.114
-0.394	1.37	-1.29	-0.839	-1.23			0.149	2.58	-0.418	-1.43	-0.777			0.485	1.88	2.01	0.222	0.51
-0.467	1.39	-2.35	-0.492	-0.0988			0.584	2.22	-2.56	-0.684	0.616			0.909	1.51	3.45	0.669	-0.86
-0.964	-0.59	-0.451	-0.0355	-0.71			0.89	1.1	-0.995	-0.538	1.32			0.732	1.24	2.32	0.7	0.103
-0.555	0.329	-0.552	-0.672	0.238			1.13	1.54	0.434	-2.04	1.18			0.48	1.53	2.52	0.855	0.923
-0.956	1.46	-1.21	-0.975	-0.814			1.14	1.48	1.67	-1.11	2			0.553	2.82	2.31	2.14	1.83
-0.829	-0.792	-0.909	-1.4	-0.617			2	1.01	1.27	-2.13	0.493			-0.15	2.4	0.798	0.769	0.726
-0.613	-0.516	-1.32	-2.22	-0.114			1.93	1.92	0.768	-1.14	0.729			-0.17	2.57	1.52	1.88	2.53
-0.51	0.0723	-0.434	-1.46	-1.06			1.31	1.22	0.664	-1.02	-1.37			-0.363	2.16	2.7	-0.0148	1.47
-0.679	-1.82	-1.42	-0.46	-0.582			1.35	1.3	0.763	-0.518	-1.18			-0.933	1.5	1.79	1.21	0.87
-0.315	-0.992	-0.675	-0.594	-0.297			1.57	1.83	2.4	-0.44	-0.105			-0.599	2.05	2.53	0.298	1.49
-0.29	-0.381	-0.546	-0.895	-0.474			0.534	2.95	2.06	-0.0159	-2.16			-0.79	1.17	0.876	-0.204	1.98
-0.397	0.712	-0.881	-2.05	1.21			0.0272	1.95	2.3	-2.2	1.17			-1.22	1.49	2.56	1.3	2.31
-0.59	0.284	-0.751	-0.662	-0.598			0.459	0.746	0.875	-1.34	1.62			-0.907	2.54	2.59	2.04	1.64
-0.694	-0.343	-0.941	-2.94	-0.497			0.407	-0.494	-0.986	-1.35	2.12			-0.723	2.59	2.09	0.949	-0.498
-1.02	-0.606	-0.376	-0.587	-0.573			0.133	0.969	0.191	-0.746	1.45			-1.18	2.03	1.89	0.415	-1.8
-1.28	0.332	-0.555	-0.667	-1.34			0.905	0.299	-0.414	-0.549	1.55			-1.24	3.26	0.946	1.12	0.321
-1.25	-0.0218	-0.371	-3.23	0.0639			1.23	1.77	-1.05	-0.608	-0.509			-1.41	2.06	0.478	0.701	-1.18
-1.27	3.3	-0.249	-1.26	-0.542			1.65	0.00629	-0.644	-0.282	-0.438			-1.23	1.33	0.964	-0.819	-1.12
-1.22	2.59	0.285	-2.09	-1.67			2.42	-0.375	1.78	-0.628	-0.405			-1.37	1.62	1.21	0.147	-0.939
-0.967	2.22	0.099	-0.872	-1.3			3.26	-0.077	0.911	-1.36	-0.536			-0.909	0.879	0.688	1.77	0.338
-1.06	2.14	-0.0292	-0.295	-0.67			2.44	-1.46	0.79	-2.5	0.779			-1.1	2.84	-1.43	1.1	0.497
-0.64	-0.312	-1	-2.04	-0.293			2.31	1.47	2.67	-1.71	-0.141			-1.03	2.48	-0.77	1.62	0.818
-0.203	1.67	-0.863	-0.991	0.125			2.52	0.403	1.96	-2.06	1.35			-1.35	2.42	-0.63	0.963	1.06
-0.185	0.567	-1.19	-1.05	-0.286			2.99	-0.849	2.48	-2.32	0.259			-0.823	2.7	1.75	1.43	1.47
-0.166	0.959	-1.72	-0.035	-0.608			2.7	-0.26	2.01	-1.98	-1.2			-0.934	2	0.735	0.237	1.43
0.478	0.847	-2.51	-1.13	-0.327			2.94	-0.525	1.45	-2.33	-0.275			-0.74	1.64	0.0106	3.03	1.05
0.614	0.601	-1.6	-1	0.0343			2.41	-0.607	1.03	-1.79	0.71			-1.48	2.89	-0.272	2.51	1.62
0.51	0.0654	-1.66	-2.67	-0.514			2	-0.385	0.47	-2.28	1.36			-1.81	1.04	-0.647	1.74	1.76
0.0709	0.274	-0.737	-1.33	-0.837			1.48	-1.02	-0.337	-1.48	0.693			-1.65	0.525	-0.93	3.24	1.99
0.735	0.267	0.208	-1.1	-0.0701			0.703	-0.594	0.751	-2.65	1.85			-1.28	1.36	0.644	0.452	1.55
-0.0814	-0.836	0.829	-1.2	-0.416			0.584	-0.817	0.797	-0.342	-0.106			-0.828	1.18	1.55	-0.327	2.02
-0.139	0.969	-0.138	-0.782	-0.632			0.326	-0.511	1.56	-0.74	-0.473			-0.751	0.188	1.27	0.604	3.07
-0.224	1.01	-0.58	-0.648	0.182			0.691	-2.51	2.17	-1.77	1.51			-0.79	-0.199	0.188	2.25	2.55
-0.603	-0.0417	-0.647	-0.48	0.614			1.26	-2.58	0.741	-0.918	-0.147			-1.03	1.8	-0.18	1.63	3.23
-0.335	0.132	-0.0694	-2.27	-0.12			0.643	-1.76	1.26	-1.86	-0.476			-1	0.41	0.62	1.95	3.42
-0.541	0.107	-0.598	-0.781	-0.46			0.786	-1.34	0.649	-3.48	1.2			-0.375	0.562	-0.252	-0.494	1.15
-1.36	0.0385	-1.21	-1.15	0.261			0.74	-1.22	1.56	-1.5	0.512			-0.925	-1.11	0.981	-0.347	2.68
-1.07	1.17	-1.5	-1.59	-0.543			0.466	-2.35	-0.572	-2.83	-0.319			-0.583	0.468	0.914	1.54	3.04
-0.821	0.876	0.44	-1.11	-1.37			1.55	-1.9	1.45	-2.54	-1.1			-0.42	-0.494	0.522	1.19	2.17
-0.776	-1.95	-0.534	0.399	-0.31			2.4	-1.77	0.447	-3.13	-2.89			0.00826	0.454	1.22	0.875	1.37
-0.961	-0.147	-0.0982	-0.459	-1.41			2.17	-1.41	0.53	-2.98	0.258			-0.399	0.332	0.487	-0.129	3.21
-0.632	-0.225	-0.173	0.647	-2.38			1.72	-1.18	0.583	-1.64	-0.55			-0.818	0.243	-1	-2.06	3.59
-0.218	1.89	0.0965	-0.967	-2.18			1.87	-0.856	1.2	-1.97	-1.14			-0.312	-0.424	0.209	-1.66	4.15
-0.101	0.651	-0.255	-0.368	-1.1			1.47	0.0652	0.413	-0.842	0.408			-0.288	-0.721	0.663	0.262	3.81
-0.0748	0.124	0.234	-0.336	-2.14			1.01	-0.963	-0.0885	-0.961	-2.73			0.0788	0.827	1.96	0.869	3.97
-0.171	0.845	-0.0558	0.371	-2.04			0.462	-0.325	-0.643	-2.15	-0.0124			-0.0777	0.0717	2.3	-1.17	2.51
0.288	1.44	0.426	0.44	-1.67			0.457	-1.71	-0.837	-1.61	-1.29			0.386	-0.505	2.45	1.43	2.73
0.588	0.932	-0.558	1.77	-1.98			0.128	-0.935	-1.04	-1.89	0.572			0.36	-0.31	0.863	0.403	3.84
0.173	0.651	-1.52	1.28	-2.3			0.599	-1.66	-0.974	-0.366	1.42			-0.12	-0.393	0.52	0.432	1.63
0.251	0.0929	-0.72	0.438	-2.45			1.41	-1.55	-0.749	-0.625	-0.63			-0.108	-0.265	-0.248	-0.321	2.67
0.484	1.38	-0.232	0.791	-2.22			1.61	-3.11	-0.0958	-1.94	-2			-0.405	-0.176	-0.0487	0.98	3.03
0.553	-0.0981	-0.0763	-0.813	-2.26			1.81	-1.92	1.14	-1.97	-0.913			-0.186	0.581	3.19	0.836	3.16
0.53	1.42	-1.17	1.23	-2.01			1.72	-1.61	2.8	-1.83	-1.98			-0.706	0.0752	2.03	-0.177	1.52
0.689	-0.272	-0.809	0.558	-2.04			1.08	-1.58	2.54	-2.58	-1.05			-1.55	1.06	1.01	-0.539	2.23
1.01	0.302	-0.967	0.327	-1.04			0.847	-1.92	1.91	-2.67	-0.796			-1.28	-1.18	0.352	2.18	1.41
0.699	0.0659	-1.06	1.31	-2.27			0.812	-2.01	1.11	-1.27	0.5			-1.73	-1.18	0.368	0.468	1.6
0.585	-0.386	-1.5	1.37	-2.15			0.695	-0.807	0.751	-1.31	1.53			-1.72	-1.16	1.09	-0.176	1.37
0.273	0.33	-2.24	0.872	-2.34			0.923	-0.479	-0.0473	-1.09	-1.32			-2.07	-0.585	2.48	0.739	2.11
0.457	1.44	-1.25	-0.0157	-1.35			1.31	0.647	0.865	-1.85	-1.03			-1.44	-0.958	3.01	2.54	2.26
0.38	-0.549	-1.51	0.52	-1.45			1.18	-0.919	0.434	-0.429	-1.51			-0.852	0.126	2.94	0.982	1.75
0.312	-1.74	-1.25	0.741	-1.42			1.25	-0.245	1.44	-1.1	-0.771			-1.16	-0.247	2.66	1.24	1.92
-0.582	-0.715	-0.625	1.74	-2.63			0.999	-0.992	0.665	-1.3	-0.384			-0.442	-0.356	2.81	1.24	1.84
-0.253	-2.29	-0.745	1.49	-2.61			0.855	-2.51	1.22	-0.715	-0.622			-0.369	0.713	1.36	0.436	1.57
1.01	-1.72	-2.12	0.44	-2.42			0.0813	-0.774	1.98	-1.96	-0.902			-0.666	0.259	1.82	-0.232	0.848
0.962	-1.03	-1.25	1.15	-1.41			-0.485	0.563	1.84	-1.52	-0.163			-0.768	0.702	0.362	0.219	0.747
0.112	-0.888	-0.41	0.767	-0.687			-0.245	-0.518	1.32	-1.81	-1.33			-1.42	1.33	1.07	-0.772	1.02
-0.0416	-1.59	-1.43	0.78	-2.29			0.467	-0.344	1.53	-2.23	-1.9			-1.77	0.15	0.682	0.666	1.51
0.661	-0.732	-0.742	0.856	-2.18			1.11	0.28	2.17	-1.27	-2.72			-2.13	-0.113	0.66	2.3	0.948
0.129	0.0541	-1.24	-0.807	-0.99			1.57	0.647	-0.296	-2.88	-5.24			-2.04	1.36	0.861	1.73	0.931
0.112	-0.216	-1.35	-1.18	-1.82			1.95	-0.319	0.503	-1.82	-0.775			-1.97	1.17	-0.533	0.296	-0.122
-0.496	0.0315	-0.0676	-0.195	-2.04			2.34	-0.269	0.571	-1.74	-0.793			-2.13	0.191	-1.01	0.618	0.949
-0.205	-0.467	0.373	0.0016	-2.75			2.13	-0.0494	-0.233	-2.02	-4.19			-1.97	0.0819	-1.43	0.273	0.996
-0.222	-2.01	0.378	1.18	-2.63			3.21	-1.48	-1.89	-1.34	-1.7			-1.84	0.111	-0.914	0.994	0.933
0.0261	-3.55	0.766	1.84	-2.23			3.94	-1.85	-2.56	-1.42	-0.307			-1.92	-0.137	0.365	1.09	2.37
-0.128	-2.36	-0.59	0.144	-2.57			3.98	-0.248	-2.11	-1.68	-2.51			-1.79	2.09	0.438	1.01	-0.0257
-0.356	-0.591	-0.336	1.34	-2.75			3.37	-0.923	-2.2	-2.35	-0.278			-1.37	1.31	1.05	1.02	0.184
-0.325	-1.72	-1.36	1.06	-2.77			3.01	-2.08	-1.48	-1.77	-1.7			-1.36	2.04	-0.585	0.844	0.152
-0.563	-0.498	-1.43	-0.272	-1.67			3.06	-0.603	-0.585	-2.97	-1.68			-1.6	3.09	0.212	0.79	0.296
-0.43	-1.4	-0.367	-0.178	-2.88			3.29	-0.955	-1.73	-2.77	-0.0594			-1.39	4.72	-0.86	0.86	1.05
-1.17	-2.86	-0.222	1.39	-2.31			3.28	-1.72	-0.68	-2.12	-2.32			-0.895	4.19	0.122	-0.562	0.484
-0.974	-1.73	-0.696	1.29	-2.44			3.02	-1.97	-0.985	-3.63	-1.76			-0.552	3.44	1.06	-1.51	2.53
-0.956	-3.17	-0.939	1.7	-2.89			3.51	-0.664	-0.157	-1.95	-2.76			-0.446	3.01	1.75	0.421	1.84
-1	-1.28	-2.01	0.498	-3.27			3.42	-1.2	-0.949	-1.73	-0.568			-0.168	2.32	0.235	0.743	2.48
-0.636	-1.41	-1.87	-0.0177	-2.72			3.8	-0.263	-0.684	-0.964	-2.05			-0.103	2.82	1.03	0.0181	1.47
-1.17	-1.77	-2.34	0.864	-2.93			2.74	-0.299	-1.41	-1.53	0.0305			-0.441	2.58	1.42	-0.979	2.6
-1.02	-1.06	-1.5	1.04	-2.15			2.62	1.28	-2.08	-1.04	-0.64			-0.363	2.23	-0.696	-2.91	1.74
-0.579	-1.01	-1.66	2.03	-1.96			3.42	0.352	-3.16	-0.639	-1.54			-0.987	2.83	-0.15	1.33	1.45
-0.00966	-1.39	-1.44	1.77	-2.09			3.11	-0.456	-1.6	-0.138	-2.73			-1.83	1.59	-0.4	1.04	1.45
-0.412	-0.714	-1.77	1.95	-2.84			2.74	-0.817	-0.934	-1.37	-1.2			-1.08	2.58	-1.27	0.783	1.73
-0.629	-0.613	-2.26	2.1	-3			2.99	-0.197	-2.54	-1.58	1.34			-1.12	1.41	-1.16	0.965	1.49
-0.881	-1.89	-1.83	2.02	-1.97			3.72	0.398	-1.06	-1.52	0.961			-1.36	0.926	-0.212	-0.213	1.69
-0.936	-0.654	-1.9	1.81	-3.56			3.29	-0.923	-1.09	-2.14	-1.4			-1.15	0.808	-1.15	-0.911	1.68
-1.01	-0.353	-2.82	0.841	-3.07			1.47	0.818	-1.21	-1.86	-1.68			-1.24	1.22	-1.51	-0.354	2.02
-0.945	0.318	-2.73	0.48	-2.64			1.94	-0.561	-1.76	-1.39	-0.215			-0.923	0.874	-1.52	0.417	1.14
-1.2	-0.87	-2.05	0.813	-0.921			1.67	-1.6	-1.27	-0.899	-2			-0.972	1.51	0.0848	-1.19	-0.247
-1.13	-0.58	-1.97	0.624	-0.682			1.43	-1.35	-1.12	-2.46	-1.92			-0.171	2.01	-1.43	-0.744	1.39
-1.41	0.826	-1.16	1.21	-1.61			1.67	-0.359	0.876	-1.89	-1.66			-0.0883	2.46	-3.1	0.56	0.293
-0.869	0.183	-1.28	0.76	-2.14			1.98	0.622	1.44	-1.8	-0.244			-0.106	0.91	-1.19	-1.19	-0.502
-1.22	-1.99	-1.31	1.32	-2.58			2.65	0.232	1.49	-1.66	-1.04			0.00804	1.65	-0.82	-0.0532	0.268
-1.33	-0.369	-1.24	0.887	-3.19			2.6	0.661	-0.416	-2.11	-0.351			-0.527	0.663	0.0998	1.12	0.482
-1.14	-0.869	-1.08	-0.146	-3.17			2.25	1.19	-0.579	-2.24	-0.116			-0.445	1.27	-2.11	0.819	1.37
-0.955	-2.09	-0.451	0.622	-1.97			1.8	-1.04	-1.6	-1.37	-0.72			-0.489	0.448	-1.44	1.02	2.06
-1.24	-1.83	0.0403	0.174	-2.36			1.62	-1.19	-0.929	-0.318	0.0793			-0.706	0.641	-0.103	0.344	1.99
-1.15	-1.82	0.0644	0.0448	-2.88			1.83	0.0188	-1.51	-0.694	-0.1			-0.389	1.49	-0.286	1.08	1.77
-1.52	-0.406	-0.437	-0.565	-3.08			1.06	1.14	-2.08	-0.00304	0.523			-0.37	1.89	-0.455	-1.24	0.9
-1.2	-0.0391	-0.0625	-0.359	-2.74			1.49	1.42	-1.5	-0.566	-1.31			-0.0295	2.22	1.01	0.0167	0.486
-1.07	0.802	-0.267	0.673	-3.16			2.23	-0.295	-2.26	-0.877	-0.344			0.351	1.82	-0.441	-0.619	0.373
-0.55	-1	0.347	1.1	-2.52			1.87	-0.677	-1.63	-1.75	-0.171			0.19	0.338	0.426	0.577	0.102
-0.276	-0.141	0.371	1.3	-2.05			1.97	0.267	-1.25	-1.38	0.00501			-0.261	0.0743	0.407	-0.867	0.684
0.144	-0.0476	0.844	0.727	-1.92			1.54	1.3	0.936	-1.11	-0.814			0.141	0.998	-0.357	0.44	2.08
0.0826	-0.308	0.875	-0.208	-1.58			1.33	1.69	-0.69	-0.497	-0.0582			-0.0241	0.256	0.814	0.787	0.817
0.0704	0.525	1.99	-0.575	-3.24			0.721	0.961	-1.07	-1.57	0.959			-0.207	0.0507	0.727	-0.838	2.26
0.306	0.343	1.1	0.642	-3.87			0.512	0.194	-2.27	-2.1	1.51			-0.22	0.429	0.401	-0.135	0.82
-0.0747	-1.03	1.21	0.638	-1.49			0.415	1.34	-2.5	-1.52	-0.326			0.0482	1.04	-0.559	-2.16	1.31
-0.254	0.126	0.603	-0.111	-3.11			0.815	1.68	-2.25	-0.465	-0.259			0.313	-0.141	-0.37	-0.932	0.75
0.0103	-0.739	1.36	-0.28	-2.58			0.323	1.58	0.124	-1.57	-0.462			1.25	0.363	-1.08	-0.289	0.206
-0.241	0.599	0.887	0.711	-2.19			0.461	1.97	-0.129	-0.809	0.121			1.51	0.383	-1.52	0.903	-0.499
-0.573	1.11	0.347	-0.551	-1.22			0.968	0.593	-0.19	0.175	-0.44			1.73	0.932	0.289	0.969	-0.142
-0.991	0.0653	-0.308	0.00711	-1.61			0.715	1	0.0168	-0.824	-1.46			1.67	1.57	-0.172	0.98	-0.304
-0.83	-1.44	1.65	0.808	-2.32			0.742	1.1	-0.337	-1.82	1.34			1.26	0.79	0.747	-1.63	-0.587
-0.881	-0.853	1.33	0.615	-2.05			0.304	1.14	-1.17	-0.568	0.284			1.09	0.684	0.597	-1.49	-1.02
-1.28	-1.55	1.05	1.87	-1.92			0.264	0.308	-1	-0.944	-0.063			0.727	0.369	0.431	-0.928	-1.17
-0.701	-0.467	0.336	1.85	-3.89			0.573	0.196	-1.22	-0.444	-2.5			0.976	2.41	0.964	-0.0634	-1.34
-0.592	-0.271	-0.614	1.07	-2.96			1.18	0.677	-0.345	-0.996	-0.542			0.518	2.51	1.12	-0.485	-2.85
-1.01	-0.612	-1.03	2.1	-0.526			1.29	-1.25	0.491	-0.147	-0.443			0.359	1.52	0.579	0.547	-1.56
-0.836	0.00953	-1.62	2.15	0.0844			1.09	-0.742	0.287	0.286	-0.945			-0.286	2.54	1.14	-0.0508	-0.456
-0.588	-0.0657	-1.92	1.83	1.09			1.11	-0.916	0.0247	0.213	-0.974			-0.939	2.62	1.49	-1.11	-1.24
-0.904	-1.33	-1.88	0.44	-0.447			1.79	0.0203	-0.963	-1.39	0.244			-1.25	0.715	2.59	-0.77	-0.677
-0.44	-1.89	-1.98	2.22	-1.04			1.48	-0.145	-1.42	-0.353	-2.3			-0.917	0.495	2.92	-1.31	-1.36
-0.426	-1.48	-0.69	2.18	-0.699			1.59	-0.709	-1.32	-1.07	-1.11			-0.879	0.709	2.08	-0.3	-1.63
-0.429	-0.992	-0.204	1	-1.01			1.88	-0.488	-0.684	-2.81	-1.27			-1.29	0.538	1.88	0.224	-0.999
-0.513	-1.12	0.318	2.17	-2.56			1.78	-1.63	-0.688	-2.63	-1.59			-1.59	-1.61	0.453	2	-2.4
-0.964	-0.928	2.03	1.01	-1.78			1.34	-1.98	-0.188	-2.77	-0.815			-1.81	-1.06	1.55	0.393	-2.05
-1.46	-1.46	1.18	2.16	-1.75			1.88	-1.76	-1.87	-1.96	-2.69			-1.62	-1.54	1.83	-0.678	-0.965
-1.14	-1.62	0.453	2.08	-2.34			1.69	-1.2	-2.6	-1.8	-3.43			-1.91	-1.98	0.702	-0.793	-1.3
-1.22	-0.913	-0.508	1.44	-2.4			1.49	-0.971	-1.15	-1.32	-1.64			-1.79	-0.605	1.64	-0.431	-0.529
-0.899	-0.458	-0.558	1.33	-2.09			1.69	-1.46	-0.141	-1.93	-1.19			-1.61	0.401	2.5	-0.0377	-0.15
-1.29	0.676	-0.581	0.73	-0.888			1.33	-1.26	0.809	-1.76	-2.21			-1.61	0.331	0.8	0.272	-0.359
-1.1	-1.5	-0.695	0.372	-1.11			1.7	-1.18	-1.27	-1.76	-0.361			-0.931	1.39	0.406	0.223	0.536
-1.25	-1.67	-0.534	1.8	-1.49			1.94	-0.294	-0.623	-1.22	-1.11			-0.375	0.532	1.11	-0.298	-0.106
-0.933	-1.94	-1.2	1.46	-1.14			1.73	-1.83	-1.93	-1.02	-2.63			-0.324	1.57	1.61	-2.84	-0.266
-0.773	-0.986	-1.09	0.448	-0.494			1.76	-1.82	-2.43	-1.41	-2.3			-0.27	2.38	0.816	-1.67	-0.265
-0.601	-1.28	-0.744	-0.617	-0.531			2.05	-1.4	-2.42	-2.12	-3.45			-0.33	1.33	1.16	-0.193	1.29
-0.969	-1.64	-2.19	-0.537	-1.7			1.65	-2.58	-2.35	-1.45	-1.67			-0.587	0.928	1.72	0.435	-1.15
-1.11	-1.44	-0.862	0.11	-1.46			1.28	-1.84	-0.348	-2.41	-2.99			-0.415	1.21	1.34	-0.0281	-0.514
-1.67	-0.844	-0.945	0.282	-2.66			1.69	-1.77	-0.329	-2.37	-3.58			-0.681	1.37	0.785	-0.0697	-0.961
-1.29	-0.377	-1.29	1.02	-0.994			1.16	-2.52	-0.399	-2.82	-4.69			-1.02	1.6	0.305	1.51	-0.783
-1.74	-1.67	-0.913	0.215	-1.59			-0.323	-1.56	-0.392	-1.96	-2.33			-1.15	0.512	1.16	1.19	0.197
-1.54	0.572	-1.9	-0.146	-1.5			-0.875	-2.22	-0.131	-1.22	-2.71			-1.33	0.074	1.71	1.26	-1.41
-0.996	0.371	-1.25	-0.317	0.371			-0.62	-2.26	-1.05	0.559	-0.936			-1.5	-0.986	1.53	0.82	-1.15
-0.632	0.899	-2.14	-0.795	0.72			0.549	-2.91	-1.46	-0.873	-2			-1.51	-1.16	2.67	2.58	-0.196
-0.601	-0.398	-1.65	-1.5	-0.759			0.502	-1.28	-1.69	-1.38	-1.5			-1.41	-0.942	0.92	0.877	-0.924
-0.983	0.612	-0.387	-0.393	-1.02			-0.232	-0.651	-0.668	-2.06	-2.29			-1.56	0.0957	0.25	1.95	-0.509
-1.09	-0.432	-1.1	0.29	0.511			0.927	-2.02	-0.525	-2.12	-1.47			-0.638	-0.827	-0.222	0.394	-0.726
-1.22	-0.71	-1.01	-0.956	0.347			1.55	-0.401	-0.36	-1.73	-1.25			-0.819	-0.289	0.538	1.87	-1.92
-1.2	-0.44	-1.11	0.711	-0.0279			1.58	-2.38	-1.89	-1.79	-2.78			-0.729	-0.0498	2.11	1.64	-0.862
-1.03	-1.76	-2.19	-0.278	0.78			1.45	-1.17	-0.635	-1.96	-1.08			0.00956	-0.755	1.24	1.1	0.151
-1.17	-2.79	-1.24	-0.573	0.365			1.67	-2.63	-1.32	-1.67	-3.87			-0.0508	-0.913	1.39	1.27	-0.844
-1.6	-1.03	0.0707	-0.597	1.74			1.6	-0.867	-1.4	-2.22	-1.12			-0.396	-0.742	0.106	-0.0216	-1.3
-1.47	-2.6	0.755	0.523	1.4			2.04	-1.39	-0.944	-1.08	-2.78			0.259	-0.524	0.362	0.467	-1.89
-1.76	-2.37	0.0744	-0.873	1.15			1.78	-0.902	-1.74	-2.36	-0.555			0.99	-0.424	0.856	0.0701	-0.699
-1.96	-2.04	0.274	-0.527	1.04			1.52	-0.674	-1.74	-0.355	-4.2			0.833	-1.86	0.353	2.28	-0.32
-1.64	-1.69	0.935	0.425	0.0463			1.18	-0.174	-0.565	-2.82	-0.988			1.42	-2.18	0.29	1.05	0.627
-1.94	-1.23	1.71	-0.564	-0.0678			0.921	-0.646	0.0358	-1.12	-1.16			1.24	-1.77	-0.371	1.62	0.429
-1.51	-1.04	0.773	-0.399	-0.106			1.41	-0.641	-0.92	-0.609	-1.43			1.47	-0.989	-0.126	0.597	-0.508
-1.5	-0.694	0.389	-1.15	-1.05			1.97	-0.967	-0.874	-1.85	-2.33			1.63	-1.37	0.766	1.21	-0.8
-1.39	-1.5	-0.841	-1.23	-0.621			2.01	-1.06	0.0799	-1.59	-3.23			1.43	-0.236	0.244	0.371	-0.54
-1.13	-0.136	-1.39	-1.56	-1.77			2.69	-1.21	0.688	-2.44	-1.65			1.17	0.44	0.694	0.0919	-0.873
-0.961	-0.0409	-1.13	-0.658	-2.69			3.15	0.201	0.469	-1.89	-0.929			0.906	-0.143	-0.119	0.764	-0.33
-1.14	1.13	-1.35	1.45	-1.72			2.85	-0.734	0.547	-1.02	-1.04			1.05	-0.273	0.773	2.15	-0.814
-1.36	0.632	-1.22	-0.0103	-0.801			2.52	-0.704	-0.801	-1.1	-0.721			1.92	-0.77	-0.179	1.98	-0.946
-1.66	-0.67	-1.31	-1.55	-1.44			2.89	-0.214	-0.152	-1.55	-0.569			3.26	-0.139	1	1.04	-0.736
-1.89	-1.17	-0.369	0.442	-1.79			1.26	-0.796	-1.49	-1.04	-3.62			1.94	-0.169	1.9	1.72	-1.54
-1.9	-0.47	0.512	-0.705	-1.76			1.31	-0.361	-0.246	-2.97	-1.23			1.42	0.219	1.75	0.53	-2.42
-2.19	0.344	0.0247	-0.407	-2.51			1.89	0.844	-0.266	-1.22	-1.87			0.0767	0.00789	1.7	-0.402	-1.15
-1.92	0.573	-1.21	-0.602	-2.29			1.48	0.543	-1.69	0.524	-2.11			0.152	0.246	1.21	0.0221	1.23
-1.78	1.03	-1.87	0.0592	-2.76			2.69	1.15	-2.07	0.842	-0.464			0.556	-0.288	1.18	-1.41	-1.28
-2.29	-0.241	-0.486	0.0888	-1.26			3.19	1.51	-1.96	-0.322	-1.38			0.509	-0.31	1.23	1.81	-1.69
-1.91	0.511	-0.279	-0.115	-1.59			3.53	1.39	-1.72	-0.23	-4.18			-0.0288	0.731	1.46	-0.198	-1.76
-1.85	2.31	-0.951	-0.315	-2.96			4.04	1.13	-1.48	-0.744	-2.1			0.183	1.09	-0.179	-0.116	-0.815
-2.4	-0.809	0.487	-0.183	-1.74			4.54	0.0681	0.0323	-0.991	-2.44			0.402	0.756	0.383	-0.402	0.086
-2.52	0.0355	-0.463	0.746	-1.6			5.17	0.405	0.455	-1.61	-1.16			0.332	1.22	0.395	-1.32	-0.215
-2.11	1.02	-1.05	0.815	-1.71			5.8	-0.66	1.05	-0.743	-3.55			0.55	0.0631	-0.319	0.00472	-1.82
-1.69	0.476	-1.95	-0.264	-2.52			5.03	0.817	1.03	-0.119	-0.59			1.3	0.642	1.12	1.64	0.401
-1.56	-0.647	-1.53	-0.975	-2.54			4.6	-0.08	1.07	0.307	-0.00668			1.27	0.244	0.00743	0.499	-0.648
-1.41	0.774	-1.35	0.439	-2.87			4.75	-0.213	0.828	-1.16	-1.79			1.01	-1.6	0.335	0.724	-0.594
-1.21	-0.109	-0.993	0.476	-2.79			4.2	-0.914	0.586	-1.75	-1.81			2.03	-2.8	0.322	0.436	-0.378
-1.32	0.1	-2.26	1.28	-3.2			4.06	-0.339	1.24	-1.69	-1.91			2.01	-0.705	1.42	-1.31	0.114
-1.09	0.811	-1.2	0.503	-3.21			3.91	-0.0403	1.14	-1.22	0.194			1.96	-0.346	1.9	-1.76	0.46
-1.33	1.55	-1.8	-1.13	-2.87			4.18	-1.11	0.373	0.000848	-0.31			2.4	0.695	0.127	-0.396	0.33
-0.813	1.63	-1.45	0.713	-2.8			3.64	-0.65	0.0512	-1.57	-1.31			1.98	-0.226	0.306	-0.617	0.26
-0.997	0.614	-1.03	-0.134	-2.07			3.83	-0.545	0.324	-2.19	-0.359			1.62	1.41	0.318	2.46	-0.601
-0.691	1.71	-0.239	-0.286	-1.6			4.15	-0.264	-1.1	-1.97	-2.57			1.32	0.687	2.43	0.343	0.665
-0.766	0.949	-0.394	-1.55	-2.69			3.9	-0.407	-0.88	-0.779	-2.73			1.39	-1.37	0.647	-0.486	0.602
-0.755	-0.107	0.254	-0.655	-1.81			3.62	-1.4	0.612	-0.724	-2.38			1.14	-2.58	1.05	-1.42	0.713
-0.715	-0.469	0.39	-0.47	-2.81			4.06	-0.0238	-0.171	-0.495	-3.47			1.21	-0.313	-0.111	1.29	0.646
-0.796	-0.766	-0.203	-1.87	-4.62			3.84	-0.97	0.491	-0.757	-3.73			1.06	0.602	-0.355	-0.423	-0.403
-0.785	-1.43	1.55	-0.87	-2.86			3.27	0.0688	-0.344	-1.68	-1.01			0.747	1.53	-0.37	-0.236	-0.707
-1.14	-0.446	1.92	0.211	-0.157			2.55	0.0926	-0.197	-2.49	-1.92			0.824	1.71	-0.921	-0.122	-0.493
-1.03	-0.881	1.23	-1.39	-1.34			1.7	0.502	1.82	-3.42	-1.24			0.715	1.61	-0.669	-0.68	-2.07
-1.02	0.234	0.171	-2.02	-1.49			1.36	-1.4	1.41	-2.78	-4.07			0.168	0.00208	1.22	-2.32	-1.72
-1.63	0.248	-0.324	-0.0888	-2.24			1.46	-1.65	2.41	-1.68	-2.95			-0.373	-0.00867	1.54	-2.57	-1.96
-1.41	1.2	-0.611	0.0062	-1.81			1.89	-0.871	2.15	-1.28	-1.11			-0.72	-1.15	0.984	-1.71	-2.29
-1.63	0.0584	-0.0781	-0.0932	-3.63			2.33	-0.271	1.38	-2.07	-4.13			-0.719	0.45	-0.452	0.425	-0.647
-1.59	1.41	-0.701	-1.44	-2.17			2.54	-0.864	1.36	-2.61	-2.74			-1.21	-0.298	0.408	0.928	-1.01
-1.66	0.95	-0.283	-0.54	-1.56			2.75	-0.737	2.34	-1.18	-2.67			-1.03	0.241	0.95	0.477	-0.943
-1.47	1.49	0.0905	-0.998	-1.22			2.79	0.593	0.944	-0.899	-2.68			-0.177	-0.511	0.126	-0.147	-0.607
-1.46	0.712	-0.53	-1.26	-3.41			1.83	0.344	0.0142	-1.88	-1.28			-0.694	2.32	0.231	-0.894	-1.18
-1.37	1.75	-0.77	-2.34	-2.59			1.39	1.31	-0.986	-2.76	-1.43			-0.79	2.01	0.695	-1.76	-0.511
-1.67	0.405	-0.479	-1.45	-2.52			1.48	-0.109	0.142	-2.46	-2.55			-0.0182	2.61	1.42	-0.453	-0.462
-1.73	-0.0489	-0.748	-0.296	-3.15			2.11	1.21	1.67	-2.01	-0.519			0.236	2.61	0.392	-0.127	-0.0465
-1.92	-0.211	-0.568	-0.632	-1.5			1.95	-0.697	1.41	-1.81	-4.21			0.45	3.63	0.648	1.61	-1.88
-2.37	0.451	-0.217	-1.62	-2.41			2.42	-1.74	0.76	-2.35	-3.13			0.784	2.84	0.811	1.81	-1.29
-2.53	-0.933	-1.12	-1.4	-3.23			2.48	-0.954	-0.482	-1.89	-2.42			0.147	2.52	1.1	0.621	-2.22
-1.96	0.417	-1.01	-1.05	-2.35			2.41	-1.1	-0.579	-1.98	-2.54			-0.434	1.36	1.5	-0.532	-1.45
-2.3	-0.714	-1.31	-0.592	-2.63			2.57	-0.311	0.355	-2.46	-2.07			-0.57	0.779	1.76	-0.218	-0.477
-2.02	-0.189	-0.939	-0.785	-3.17			3.84	-0.47	-0.789	-3.27	-0.938			0.249	1.34	2.35	-0.0544	-0.215
-2.06	-0.863	-1.27	-1.56	-2.42			4.5	0.324	-0.638	-0.127	-1.93			0.54	1.39	2.36	0.328	-1.44
-2.19	0.791	-1.34	-0.278	-3.62			3.33	0.921	-1.03	-0.492	-1.76			0.235	1.79	2.84	0.445	-1.4
-2.14	-1.99	-1.67	-0.274	-2.49			2.74	0.0903	-0.534	-1.69	-2.66			0.939	2.5	3.38	1.03	-1.54
-1.62	-0.369	-1.78	-0.168	-1.28			2.74	0.544	-0.302	-2.26	-3.42			0.976	2.04	1.92	1.03	-1.97
-1.23	-0.491	0.427	-0.678	-2.1			3.49	-0.475	0.147	-2.55	-3.78			1.59	0.819	2.95	1.7	-1.22
-0.84	-2.45	0.278	-0.182	-2.25			3	0.865	-0.724	-2.22	-2.55			2.5	2.04	2.09	1.53	-1.56
-0.909	-1.97	0.374	0.741	-2.69			2.39	1.63	-0.343	-2.39	-0.944			2.5	1.66	1.71	0.709	-1.12
-1.59	-2.19	-0.659	-0.332	-1.97			1.85	0.228	-0.0921	-2.03	-1.52			2.41	1.29	1.86	0.325	-0.582
-1.12	-1.43	-0.716	-1.02	-3.12			1.85	-0.272	-0.753	-2.02	0.283			1.73	0.587	1.81	1.71	-0.267
-1.51	-1.62	-1.6	-1.89	-2.75			2.87	-0.0317	0.559	-2.67	-1.65			1.01	1.68	1.44	0.218	-1.07
-1.51	-1.68	-1.52	-1.31	-3.29			3	0.446	-0.157	-1.47	-2.24			0.62	2.66	2.17	1.75	-1.88
-1.92	-1.82	-0.0478	-2.59	-2.6			2.95	0.0641	-0.311	-1.77	-1.25			0.509	3.34	1.23	-0.386	-1.17
-1.7	-0.897	-0.253	-0.235	-1.91			2.61	-0.911	-0.746	-3.15	-2.79			1.25	2.59	2.88	-0.68	-0.216
-1.78	-0.325	-0.156	-0.967	-1.97			3.67	-0.527	0.23	-2.48	-0.621			0.637	2.51	3.09	-0.952	0.696
-1.69	0.727	-0.408	-0.126	-2.85			4.17	-0.46	-0.63	-3.18	-0.592			0.0415	1.63	3.53	1.13	-0.768
-1.7	1.15	-1.23	-1.13	-3.01			3.55	-0.776	-0.286	-3.18	-1.26			0.026	1.15	2.67	0.46	-0.626
-1.31	2.2	-0.767	0.313	-2.11			2.28	-0.174	-0.788	-1.9	-0.87			0.498	0.415	1.76	-1.43	-0.112
-1.09	0.827	-0.989	-0.0549	-1.76			2.5	-0.644	0.666	-1.32	-1.24			0.998	2.35	2.63	-1.87	0.0575
-1.66	0.128	-1.97	-0.806	-1.19			3.01	-1.46	2.97	-1.97	0.681			1.01	0.755	2.24	-1.26	-0.725
-1.39	-1	-1.84	-0.185	-0.891			3.55	-0.589	3.48	-1.69	-0.721			1.44	0.88	2.25	-1.13	-1.13
