# Supplementary material for: Metabolic sensing in AgRP neurons integrates homeostatic state with dopamine signalling in the striatum
Source: eLife journal article supplement (doi:10.7554/elife.72668), 2022-01-12
Supplement: fig5-data1 [file Fig5F.xlsx]

## Sheet: Sheet1
	WT							KO
NFO	0.966716	0.266278	0.146525	0.165032	0.635959	0.285022		-0.726572	0.309835	-0.157314	0.0281019	-0.109508
Chow	2.13918	0.566162	-0.0168034	0.924128	0.7857	-0.0620422		1.40768	0.759395	0.749229	-0.587816	2.05545
PB	2.91683	4.22804	0.997191	0.568774	0.465542	-0.444172		-0.190585	1.24018	0.469112	3.30547	1.51492
