# Supplementary material for: Metabolic sensing in AgRP neurons integrates homeostatic state with dopamine signalling in the striatum
Source: eLife journal article supplement (doi:10.7554/elife.72668), 2022-01-12
Supplement: fig5-data1 [file Fig5G.xlsx]

## Sheet: Sheet1
	WT							KO
NFO	-2.04873	-1.45022	0.276064	-0.24722	-0.296434	0.315874		-0.770229	-0.302547	-0.787275	-0.143442	-1.62904
Chow	-1.82876	0.0297368	-0.497539	-0.835743	-0.0798798	1.87059		1.72448	-0.344228	0.101916	-1.48599	-0.980315
PB	-1.56446	2.11702	-0.845551	0.459099	1.02455	4.08124		-0.254339	0.798316	1.04026	0.633211	0.426907
