# Supplementary material for: Metabolic sensing in AgRP neurons integrates homeostatic state with dopamine signalling in the striatum
Source: eLife journal article supplement (doi:10.7554/elife.72668), 2022-01-12
Supplement: fig5-data1 [file Fig5H.xlsx]

## Sheet: Sheet1
NFO									CHOW									PB
-1.8	0.626	1.42	-0.706	-0.366	-2.04				0.613	-1.33	0.0753	-0.14	2.18	1.22				1.82	-0.566	1.96	1.15	1.82	0.805
-0.997	0.672	-0.665	-0.553	-0.603	-2.34				-0.158	-1.11	-0.12	-0.0395	1.52	1.97				1.29	-1.07	-0.542	1.3	0.996	0.35
-0.68	1.47	1.07	0.302	-0.696	-1.77				-0.797	-1.32	-0.19	0.213	1.14	1.76				0.678	0.676	1.64	-0.0275	1.42	-1.03
0.227	-1.12	0.869	0.723	-1.05	-1.6				0.137	-1.44	0.29	0.94	0.396	2.04				0.551	-1.39	0.706	0.328	0.614	-1.99
-0.307	2.21	0.866	-0.715	-0.676	-0.299				1.06	-1.91	0.404	-0.292	-0.611	1.29				0.185	-0.303	1.26	1.86	0.168	-0.594
-0.428	1.34	-0.518	0.0823	-1.13	-0.57				0.586	-1.78	0.144	-0.611	-0.585	1.2				-0.667	-0.241	-0.282	1.35	0.723	-0.966
0.704	2.3	1.28	-0.447	-0.277	0.124				0.432	-1.5	1.08	-0.0612	-0.075	-0.491				-0.877	-0.896	-0.285	0.634	-0.475	-0.662
0.574	0.395	0.987	1.35	-0.427	-1.31				0.862	-2.13	1.66	-0.439	0.299	2.46				-0.888	1.46	-1.11	-0.2	-1.12	0.411
0.363	-0.394	1.42	-0.395	-0.02	-1.83				1.05	-1.9	1.73	-0.693	-1.31	1.43				0.149	-0.55	-1.19	0.839	0.216	-0.516
-0.0428	1.11	-0.841	-0.651	-0.141	-1.54				0.873	-2.01	0.9	-1.34	-0.734	0.5				0.00779	-0.468	0.786	1.49	0.834	0.498
0.132	-0.162	-1.1	0.546	-0.146	-1.55				-0.319	-2.12	0.635	-0.775	-0.942	-0.118				-0.187	1.39	-0.605	-0.158	1.46	-0.897
-0.0333	-1.28	0.0682	0.747	-0.109	-1.59				0.307	-1.49	1.02	-0.906	-0.704	0.806				0.497	-0.00014	-0.0429	0.169	0.601	-0.947
-0.246	0.277	-0.155	0.158	-0.735	-1.14				1.06	-1.64	1.78	-0.758	-0.359	-1.45				0.00128	-0.000767	0.191	0.498	-0.843	0.203
-0.784	0.257	-1.23	0.234	-0.539	-2.81				0.976	-2.11	1.17	0.134	-0.905	-1.62				-0.42	0.333	-0.626	0.652	-1.01	1.07
-0.881	-1.06	-1.21	0.741	-0.703	0.257				-0.393	-1.88	0.434	-0.595	-0.486	-0.451				-0.371	-0.523	0.718	0.68	-0.00229	0.741
-0.0242	0.992	-1.87	-1.16	-0.977	-1.01				0.481	-1.32	0.413	-0.461	-0.571	1.11				0.695	0.986	0.918	0.145	-1.52	-0.457
0.816	-0.0876	-2.5	0.373	-0.69	0.365				0.08	-0.778	1.33	-1.02	-0.645	-0.387				1.25	-0.531	-0.492	0.398	-1.29	-0.706
0.676	0.0726	-0.306	-0.561	0.122	-0.312				1	-0.846	1.63	-1.41	-0.963	0.274				0.269	-0.243	-0.585	0.363	-2.44	0.0476
1.4	0.59	-0.597	-1.05	-0.385	1.18				0.737	-0.484	1.43	-0.493	-1.46	1.09				-0.0842	0.324	-0.83	2.5	-1.64	0.587
0.509	0.383	0.177	-0.286	-0.681	-0.845				1.41	-0.306	1.7	0.263	-1.36	1.29				-0.717	-0.469	0.398	2.23	-1.31	0.114
0.689	-0.513	-0.663	-1.18	-0.722	-0.0406				0.999	-1.32	1.7	-0.631	-3.08	1.14				-0.787	0.772	0.106	0.603	-0.606	0.633
1.51	0.56	-0.19	-1.6	-0.539	-0.0366				0.0805	-1.32	1.54	-0.633	-2.12	0.618				-0.848	1.11	1.99	2.01	0.0527	0.544
1.55	0.0335	0.137	-1.32	-0.5	-1.6				-0.394	-0.728	2	-0.591	-1.71	0.452				-1.16	1.35	0.418	1.4	0.768	-0.0461
1.63	-1.73	0.136	-0.905	-0.221	0.126				-0.478	-0.782	1.39	-0.71	-1.29	-0.382				-1.28	0.361	0.571	1.45	0.525	-0.431
2.92	-2.4	-0.15	-0.804	-0.663	-0.721				-0.613	-0.981	1.3	-0.325	-2.06	0.569				-1.03	-0.576	-0.313	0.294	0.49	-2.1
2.54	-0.614	0.324	0.197	-0.452	0.352				0.294	-0.758	1.47	-0.455	-2.43	0.428				-1.26	-0.866	0.321	1.03	-1.34	0.12
0.884	-0.0859	-0.51	-0.385	-0.634	0.529				0.119	-0.278	1.34	-0.61	-0.416	-0.847				-1.13	0.794	0.197	-0.929	-0.291	-1.11
0.303	-0.788	0.608	0.226	-0.487	0.738				-0.0555	-0.761	1.61	-0.598	0.826	0.21				-1.75	1.35	0.463	-1.22	-0.792	-0.661
0.629	-0.422	0.427	-0.315	-0.503	0.469				0.467	-0.613	0.613	-0.383	1.32	0.908				-2.06	2.4	-0.482	-1.12	-0.932	-0.552
0.797	-1.52	1.62	1.02	-0.82	-0.464				1.09	-1.04	0.808	-1.62	0.977	1.5				-2.05	1.76	0.0884	-0.985	-1.38	1.22
1.66	-0.66	1.12	1	-0.86	-0.439				0.599	-0.00412	1.35	-0.858	0.805	-0.995				-2.38	-1.71	-0.86	-1.64	-0.396	-0.443
1.97	-1.59	1	2.32	-1.3	1.22				-0.609	-0.378	1.69	-0.896	-0.313	-0.326				-2.72	0.205	0.272	-2.2	-0.669	0.279
1.16	-0.222	1.17	2.28	-1.57	0.81				0.0113	-0.125	0.965	-0.0686	-0.449	-0.953				-2.73	0.298	0.176	-0.515	-0.165	0.173
0.279	-0.484	2.48	1.63	-0.68	0.103				-0.388	0.215	1.27	-0.0224	0.29	-0.423				-2.31	0.346	-0.21	-0.559	1.43	-1.27
-0.0823	0.0469	0.557	0.199	-0.67	0.215				0.47	1.2	1.12	-0.491	0.614	-0.698				-2.25	0.633	0.799	1.07	2.68	-0.802
0.333	-0.249	1.2	0.76	-0.6	0.0579				1.83	1.43	0.786	-0.561	-0.17	-1.59				-2.04	-0.601	-0.382	1.41	0.156	-1.71
0.948	-0.737	1.17	1.67	-0.356	-0.323				0.814	0.529	0.559	-0.786	1.13	-1.64				-1.66	1.11	0.181	1.07	-0.0501	0.228
0.548	0.725	0.623	1.11	-0.856	-0.448				1.06	-0.155	0.366	-0.175	1.76	0.635				-0.855	-0.171	1.15	0.902	0.164	-0.125
0.792	1.85	0.0368	1.88	-0.132	-0.858				1.19	0.448	-0.0337	-0.305	0.528	-0.695				-0.0618	0.64	0.664	-0.0354	0.387	0.823
0.0621	-1.16	-1.13	2.2	-0.313	0.407				0.926	0.463	-0.526	-1	0.163	-0.216				0.387	0.326	0.583	-0.88	0.0321	-1.25
-0.297	-0.149	-0.0799	1.52	-0.134	0.553				0.299	0.22	-0.0352	-0.354	-0.859	0.243				-0.251	0.978	0.557	-0.433	0.307	-0.177
-1.17	1.84	-0.113	1.47	-0.237	0.297				0.0534	0.427	-1.05	1.28	-1.03	0.94				-0.856	-1.22	0.407	-0.938	-0.259	-0.479
-0.816	0.477	0.545	2.34	0.0657	0.723				-0.975	-0.335	-0.177	2.58	1.1	-0.484				-0.539	-0.562	0.71	-1.32	-0.364	-1.1
-0.186	1.03	0.648	1.46	-0.31	1.24				-1.24	-0.237	-0.499	2.99	0.958	-0.532				0.592	0.0687	1	-0.998	-0.351	0.511
0.985	1.04	-1.05	1.99	0.0334	2.42				-1.38	-0.000739	-1.05	2.62	0.559	0.364				1.4	-0.967	0.695	0.109	-0.984	-1.33
0.944	1.33	-0.619	0.106	0.089	1.77				-1.24	0.176	-1.11	1.91	1.62	-1.76				2	-1.73	-0.308	-0.234	0.382	0.283
-0.235	1.11	-2.12	1.02	-0.665	0.956				-1.03	0.804	-0.689	2.31	0.93	0.181				1.68	-0.589	-0.875	-0.294	0.397	2.07
-0.446	1.19	-0.471	0.182	-1.07	1.31				-2.27	1.45	-0.618	1.68	1.13	0.248				1.14	-0.755	1.35	-2.02	1.06	2.19
-0.21	1.11	-0.703	-0.38	-0.469	0.982				-2.43	0.736	-0.0435	2.36	1.36	-1.03				0.552	-1.19	0.0552	-0.739	1.28	0.286
0.245	0.336	-0.114	-0.741	-0.0595	0.569				-1.99	0.241	0.0314	3.02	1.64	-0.83				0.479	0.466	0.692	0.276	0.845	1.25
1.13	-1.22	0.285	-0.818	0.181	-0.245				-2.2	1.01	0.254	2.1	1.22	0.705				0.505	-0.0377	0.408	-1.05	0.0193	1.05
1.32	0.807	-1.58	0.00713	0.606	0.263				-1.22	1.35	0.109	2.96	1.16	-0.0416				0.0575	-0.25	-0.313	0.243	-0.887	0.282
0.824	0.197	0.176	0.652	0.606	0.228				0.938	1.88	0.0492	1.67	0.816	-2.07				0.0823	-0.47	0.837	0.18	-0.229	0.949
0.901	-0.0634	-0.532	0.408	0.558	-0.36				1.3	1.69	-0.275	1.01	0.424	-2.3				0.0329	1.55	-0.712	-0.0824	0.223	1.12
0.507	0.185	-0.356	-0.672	0.545	-0.833				0.479	0.566	0.0896	0.336	0.785	0.971				-0.000486	-0.15	-1.26	-0.394	-1.28	0.0445
0.937	0.271	0.229	1.06	0.34	-0.356				1.98	1.54	0.361	0.452	-0.172	0.481				-0.245	0.588	-1.96	-0.149	-2.03	0.247
0.963	-0.98	0.069	0.252	0.0628	-0.973				0.909	0.798	-0.0517	1.05	-0.732	-0.786				-0.393	0.385	-0.386	0.928	-1.88	0.29
1.53	1.75	-0.027	-0.491	-0.0343	-1				0.602	0.121	0.152	-0.128	-1.49	0.644				-0.373	1.21	0.4	1.08	-1.34	0.554
0.858	-0.52	0.563	-1.48	-0.148	-0.0681				0.587	1.2	-0.544	-0.121	-1.96	-0.472				-0.283	0.407	1.91	-0.17	-0.525	1.29
1.26	-1	1.01	0.205	-0.955	0.0842				0.66	0.548	-0.79	-1.16	-1.14	0.369				-0.265	1.02	0.743	-0.641	-0.57	-1.82
0.284	0.0979	0.839	-0.151	-1.01	1.09				1.57	-0.0489	-0.321	-0.48	0.202	0.107				-0.536	2.29	1.88	-0.326	0.09	-0.321
-0.229	0.0197	-0.378	-0.0844	-1.3	0.506				1.3	-0.156	-0.708	-1.1	-0.099	0.209				-0.0309	1.11	0.588	0.142	0.431	0.524
-0.626	1.97	0.754	0.0608	-0.901	-0.427				1.56	0.545	-2.42	-0.529	0.875	1.12				0.272	0.0285	0.582	0.0424	0.148	0.711
-1.08	0.0645	2.05	-0.0312	-1.12	-0.346				1.19	1.22	-0.886	-0.281	0.141	0.33				0.775	-0.405	-0.876	-0.825	1.11	-1
-1.51	0.362	2.02	-0.863	-1.29	-0.446				0.345	1.39	-1.15	-0.152	-0.475	-0.209				0.969	-0.247	1.39	0.347	1.67	-1.46
-2.12	0.712	1.58	-0.106	-0.548	-0.895				0.0719	1.53	-0.736	-0.261	-0.465	-0.17				1.02	-3.22	0.377	-1.06	1.69	-0.632
-1.55	0.384	1.61	-0.353	-0.578	0.971				1.1	0.743	-1.12	0.223	0.0457	0.972				0.488	0.921	-0.344	-0.481	1.87	0.00648
-1.69	-0.302	0.855	-0.884	-0.409	0.348				0.66	1.04	-0.908	0.808	0.117	0.254				0.205	0.63	0.721	0.257	1.23	1.78
-2.11	-0.299	0.988	-1.32	-0.391	1.23				0.195	0.807	-0.534	0.367	-0.451	-0.00954				-0.0332	-0.688	-1.02	0.374	0.23	-0.293
-2.16	-1.51	1.01	-1.19	0.0111	1.58				0.401	0.62	-0.232	0.235	-0.133	0.544				0.283	-0.581	0.408	-0.314	1.52	-1.08
-1.68	-1.17	0.213	-2.19	-0.622	1.43				-0.165	1.48	-0.584	1.15	0.00955	0.697				0.615	-0.578	-1.18	0.597	1.09	-1.33
-1.63	1.46	0.202	-1.32	-0.641	-0.363				-1.73	0.79	-0.907	-0.231	0.0502	1.67				0.568	0.104	-0.595	1.49	0.967	-0.0779
-0.787	0.33	-0.46	-0.526	-0.111	1.14				-1.78	-0.552	-0.729	-0.962	-0.737	1.12				0.488	-1.22	-1.07	0.605	0.509	-0.392
-1	-0.376	1.13	-1.21	1.02	2.13				-1.61	0.305	-0.411	-0.722	-0.43	-0.445				0.0603	1.21	0.133	0.0917	-0.419	0.807
0.183	0.706	0.347	-1.13	0.834	0.192				-0.526	1.05	-0.261	-0.273	-0.0487	-1.49				0.0798	0.63	-2.08	-0.883	0.472	0.373
-0.262	0.0748	-1.94	-1.57	1.03	0.925				-0.701	0.419	-0.913	-0.469	0.575	0.112				0.00668	0.815	-2.01	0.202	1.04	1.7
-1	0.784	-1.64	-0.25	0.684	1.13				0.715	1.14	-0.361	-0.878	0.00937	0.17				0.0337	1.8	-1.75	0.712	0.0281	-1.94
-0.898	0.184	-0.251	0.0764	0.28	2.15				-0.0229	0.67	-0.558	-0.182	0.21	-0.498				0.0531	0.292	-1.28	0.315	-0.567	-1.51
-0.493	-0.291	-1.5	-1.83	-0.00347	1.22				-0.644	1.18	-0.307	-0.473	0.285	-1.04				0.405	-1.69	-0.597	-0.222	-0.912	-1.42
-0.383	0.144	-2.47	-1.02	0.14	0.269				-1.54	0.498	-0.795	-0.264	1.3	-1.97				1.01	-0.505	-0.996	-0.823	-0.166	-2.08
-0.873	0.137	-1.15	-0.745	0.208	0.723				-0.532	0.474	-0.0973	-0.0905	0.124	0.112				0.858	1.26	-1.63	-1.89	0.632	-0.724
-0.403	-0.587	-0.613	-0.166	0.201	0.78				0.133	0.145	0.424	-0.383	-0.348	-1.66				0.645	-0.999	-1.13	-1.28	-0.221	1.56
-0.146	1.28	0.139	-0.591	0.139	0.613				-1.26	0.541	0.101	-0.483	-0.649	-1.58				0.863	0.292	-0.605	-1.48	-0.514	0.0196
-0.378	-1.78	0.0444	-1.08	0.575	-0.0286				-0.493	0.367	0.308	-0.883	-1.31	-0.806				0.899	-1.21	-1.4	-1.35	-0.0392	-0.13
-1.2	0.169	0.152	-1.26	1.52	-0.899				-0.926	0.774	-0.231	-0.131	-0.994	0.594				1.42	0.58	-0.901	-0.48	0.55	-0.995
-1.16	1.34	-0.413	-0.719	1.17	-0.795				0.155	0.219	-0.498	0.019	0.0486	-0.29				1.23	0.408	-1.78	0.191	1.2	-0.223
-0.663	-0.828	-0.194	-1.25	1.38	-0.459				1.05	0.476	-1.38	-0.5	0.58	-0.127				1.07	0.109	-1.2	-0.961	1.51	1.21
-0.257	-0.113	0.657	-0.241	0.491	0.353				0.222	0.029	-0.772	-0.42	0.79	-0.545				0.737	-0.881	-1.53	-0.968	0.554	0.801
-0.0882	0.191	-0.186	-0.353	0.115	0.0729				0.601	0.4	-0.658	-0.585	-0.256	-0.492				0.21	-0.0594	-0.132	-0.982	1.1	-0.354
-0.21	0.193	0.323	0.936	-0.6	0.206				0.807	-0.619	-1.14	-0.262	-0.0171	1.34				-0.102	0.771	0.466	-1.47	1.6	0.465
-1.05	-1.45	-0.409	1.23	0.0665	-0.342				0.116	0.277	-1.4	-0.154	0.0203	-0.656				0.319	0.388	-0.623	-2.72	-0.272	2
-0.532	-2.07	0.978	1.23	0.973	-0.735				-1.28	0.67	-0.644	0.0495	-0.098	-0.569				0.782	-0.337	-0.48	-0.51	-0.73	-0.74
-0.439	-0.471	-0.561	0.0839	2.56	-1.67				-1.04	-0.749	-0.262	-0.405	0.306	-1.35				0.801	-2.67	0.103	0.799	-1.32	-0.298
-0.273	-0.638	-0.2	0.635	2.84	0.495				-1.59	0.303	-1.68	-0.871	0.604	0.733				0.391	-1.26	0.953	-0.559	-1.43	1.14
-0.574	-1.01	-0.984	0.216	2.21	1.05				-1.2	-0.0629	-1.63	0.245	0.99	1.14				0.264	0.347	1	1.35	-1.22	1.42
-0.523	-0.669	-1.2	0.376	2.34	0.25				-0.586	0.2	-1.96	-0.568	0.256	-1.2				0.506	-0.937	0.367	1.46	-1.23	1.37
-0.302	-1.1	-0.93	-0.706	1.98	0.738				0.545	0.281	-0.803	0.53	1.27	-0.438				0.463	0.165	-0.213	0.357	-0.511	0.891
-0.0168	0.343	0.0116	0.154	2.06	0.0887				-0.793	0.864	-1.44	0.409	1.58	-0.727				0.364	-1.34	0.464	-0.0912	-0.858	0.302
-0.315	-2.64	-1.04	0.51	2.36	0.0267				-1.67	0.425	-1.7	0.384	1.48	0.195				0.85	0.832	-0.89	-0.859	-0.269	-0.191
-0.0745	-1	-0.693	0.664	3.41	-0.714				-0.77	-0.137	-1.26	-0.349	0.597	-1.42				1.16	-0.342	3.43	0.445	-1.14	1.37
0.876	-0.0115	-1.56	0.175	3.02	-0.596				-1.1	0.624	-1.37	0.56	-0.468	-0.205				1.02	-2.01	1.75	0.0156	-0.502	1.66
0.638	-1.71	-0.768	0.837	2.28	0.276				-0.85	1.53	-1.28	-0.542	-1.87	-0.609				0.827	-1.61	1.89	-0.331	0.694	0.85
-0.567	-0.0284	-1.65	0.302	1.44	0.379				0.59	0.0539	-0.799	-0.579	-1.68	0.35				0.577	-0.914	1.01	0.211	1.43	-1.78
-1.26	-0.207	-1.21	-0.72	1.86	0.481				0.859	-0.358	-0.395	0.0459	-1.8	0.154				0.56	-0.157	1.72	-0.391	1.71	-0.679
-1.41	-0.0201	0.347	-0.0841	1.81	0.0757				-0.319	-0.348	-0.446	-0.164	-1.09	0.465				0.588	-1.25	1.23	-0.601	1.28	-0.886
-1.77	0.759	-0.778	1.25	2.1	-0.157				-1.39	0.272	-0.468	-0.0208	-2.23	-0.541				0.914	-0.636	0.311	-1.1	0.682	-0.419
-0.738	-0.99	-0.828	1.9	2.81	0.546				-2.62	0.428	0.164	0.436	-2.05	0.375				0.695	-0.147	1.29	0.596	1.76	0.742
-0.202	-1.65	-1.7	1.86	2.45	-0.413				-1.19	0.216	-0.739	0.783	-1.24	0.185				0.354	-0.134	0.523	0.973	1.91	1.22
0.0165	-0.344	0.252	1.94	1.94	-1.54				-1.15	-0.0375	-0.227	-0.217	-1.69	0.527				0.363	-1.2	1.11	0.143	0.598	0.595
-0.469	0.239	1.66	1.92	1.57	0.687				-0.812	-0.127	-0.403	0.000891	-2.15	0.0779				0.635	-0.0209	1.52	-0.261	1.31	0.959
-1.91	1.05	0.876	2.36	1.37	-0.659				0.424	0.0672	-0.0547	-0.131	-1.17	0.216				0.557	-0.448	-0.506	-2	0.868	1.24
-2.21	-0.732	-0.33	0.916	0.731	-1.14				-0.935	-0.335	-0.572	-0.564	-0.804	0.932				0.0642	-1.08	-1.73	-0.547	0.466	1.65
-1.64	0.386	0.581	0.583	1.09	-1.74				-0.238	-1.23	-0.382	-0.787	-0.923	-1.49				0.134	-1.12	0.599	0.0787	-1.23	0.518
-1.06	0.111	-0.696	0.494	1.08	-1.07				-0.922	-1.76	-0.134	-0.655	-0.11	-0.0174				-0.441	-2.14	-0.254	-0.196	-0.618	2.08
-0.989	0.655	-2.26	0.449	1.02	-0.527				-1.15	-0.584	-0.84	-0.135	0.234	0.651				-0.584	-1.08	-0.488	-0.166	-1.42	2.56
-0.261	0.261	-1.33	0.0976	0.768	-1.88				0.116	-0.337	-0.153	-0.201	1.12	0.339				-0.352	-0.612	-0.143	0.333	-2.3	1.95
-0.0692	-0.943	-0.543	0.601	0.261	-0.209				-0.929	-0.925	-0.42	0.0766	0.00291	-0.34				0.273	-1.76	0.753	-0.698	-0.403	1.22
-0.0451	-0.631	-1.38	0.134	0.195	-0.989				-0.977	-0.824	-1.16	-1	-0.458	-0.313				0.341	0.429	-0.12	-0.504	0.309	1.43
-0.983	-1.69	-0.708	-0.607	0.442	-1.57				-0.427	-0.198	-0.89	-0.982	-0.814	-0.174				0.519	0.915	0.0362	-0.286	-1.35	-0.491
-1.11	-0.242	-1.57	-0.497	0.684	-0.981				-0.00559	0.19	0.596	-1.11	-0.306	-0.674				0.515	-0.806	2	-0.616	-1.92	0.496
-1.24	-0.73	-1.89	-0.0363	0.469	0.686				0.845	-0.0327	-0.622	-0.426	-0.359	1.47				0.63	0.5	0.0748	0.079	-1.4	0.367
-1.69	0.814	-0.544	0.309	0.977	0.00641				1.38	0.0496	0.156	-0.616	-1.15	0.86				0.657	1.08	0.345	0.179	-0.367	-1.49
-1.83	-1.99	-1.13	0.977	1.08	-0.672				0.223	-0.671	-0.147	-0.223	-0.818	0.566				0.194	-3.2	1.12	1.05	0.0191	-1.05
-2.33	-1.42	-1.19	-0.176	0.981	-0.924				-0.86	-1.28	-0.546	0.502	0.674	-0.202				0.00473	-0.0676	0.874	1.3	0.195	-1.43
-2.61	0.431	-0.907	0.131	1.09	-1.41				-0.888	-0.12	-0.695	0.755	-0.337	0.44				-0.396	-2.01	1.91	0.814	-0.822	0.026
-2.17	-1.7	-2.99	1.24	0.129	-0.522				0.122	0.312	-1.11	0.37	-0.486	0.488				-0.713	1.64	0.642	1.24	0.214	1.98
-2.08	-2.95	-1.6	1.58	0.572	0.368				-0.924	-0.676	-1.23	-0.641	-0.0459	1.15				-0.628	0.383	0.69	1.28	0.0788	-1.08
-2.5	-0.769	-0.219	1.1	0.676	-0.596				-0.537	-0.394	-0.95	-0.17	0.551	1.47				-0.468	-0.379	0.135	1.12	0.137	-0.0279
-2.01	-1.05	-2.45	0.425	0.796	-0.012				0.393	-0.171	-1.02	0.351	2.11	0.0194				-0.504	0.143	1.2	0.0701	-1.01	1.19
-1.2	0.39	-2.87	0.782	1.46	-0.416				-0.00476	0.0643	-1.48	0.409	1.42	0.575				-0.478	0.456	0.657	1.23	-1.11	-0.647
-1.56	0.299	-2.36	1.47	1.45	-0.203				-0.269	0.442	-1.32	-0.49	0.505	-0.343				-0.319	-2.47	-0.313	1.9	-1.24	-0.109
-1.77	1.27	-2.96	1.17	0.909	0.268				0.104	-0.522	-1.26	0.322	-0.157	-0.587				-0.204	-0.749	0.827	2.67	-1.3	-0.935
-1.51	0.618	-1.23	1.24	0.725	-0.121				0.148	-0.542	-1.33	-0.55	-0.00349	-0.364				-0.144	-2.11	0.392	2.12	-1.32	0.0713
-0.755	-0.566	-2.23	0.346	0.199	-0.27				0.511	-0.721	-1.01	0.0744	-0.205	2.12				-0.806	1.4	0.408	1.5	-0.864	1.01
-1.11	0.576	-1.85	1.02	0.302	-1.72				0.552	-0.169	-1.06	0.0767	0.0403	0.175				-0.683	-0.327	-1.36	0.368	-0.692	-0.223
-1.43	0.531	-3.57	1.17	0.646	-0.713				0.0947	0.0164	-1.96	0.13	-0.134	3.06				-0.68	0.429	-0.975	0.558	-0.0883	1.28
-0.332	-1.03	-1.28	1.67	0.601	0.205				0.216	-0.299	-1.71	0.178	-0.539	0.197				-0.525	0.25	-3.35	0.242	-0.523	-1.14
-0.71	0.538	-2.29	0.816	0.557	0.471				-0.315	-0.842	-1.29	-0.34	-0.179	-0.0227				-0.599	1.48	-1.19	-0.32	-0.561	-0.0671
-0.0872	0.484	-2.13	0.666	-0.249	-0.259				-0.0267	-0.41	-2.33	-0.272	0.428	0.606				-0.244	-0.672	-0.0285	0.523	-1.83	-0.0669
-0.0983	0.466	-0.475	1.53	-0.269	-1.21				-0.205	0.465	-1.28	0.41	1.44	0.211				-0.307	0.131	-1.8	1.04	-0.654	0.356
0.617	1.14	-0.596	0.701	0.131	-0.68				-0.971	-1.03	-1.95	0.79	2.18	1.61				0.016	-0.552	-1.32	1.03	0.381	0.715
0.287	0.203	-0.471	-0.0628	0.724	-1.4				-0.39	-0.344	-0.801	0.647	2.37	2.76				-0.581	-1.52	-1.62	0.352	0.937	0.472
1.98	0.22	-0.968	-0.374	1.05	-1.29				-1.05	0.745	-1.37	1.57	1.43	0.46				-1.28	0.243	-1.73	0.528	0.767	0.814
1.36	-0.585	-1.44	0.85	1.92	-0.162				-0.52	0.0134	-1.31	0.177	1.43	1.08				-1.8	-0.725	-0.905	-0.388	0.192	1.49
1.07	-0.216	-0.204	0.351	1.32	0.204				-0.0394	0.605	-1.88	0.236	1.77	0.691				-1.67	0.194	-0.919	-0.597	-0.721	1.73
-0.464	-1.23	-0.184	1.17	1.07	-0.595				-0.594	-1.01	-0.141	0.105	2.25	0.81				-1.55	-0.584	0.00242	-0.671	0.36	0.88
-1.19	-2.05	-0.747	-0.137	0.759	-1.86				-0.358	-0.522	-0.786	0.324	1.75	-0.15				-1.56	-1.62	-0.791	-0.118	0.808	0.193
-1.75	-0.779	-0.0109	-0.0975	-0.162	-0.0163				-0.469	-0.996	-1.23	-0.312	1.56	0.738				-0.93	-1.89	-0.759	0.417	0.289	-0.317
-1.57	-0.733	-1.32	-0.256	-0.447	-0.688				-0.366	-0.259	-1.25	-0.147	1.43	0.847				-0.492	-2.03	-0.837	1.11	2.41	0.991
-1.3	-1.63	-1.8	0.379	-0.25	-0.0837				-0.0384	-0.716	-0.665	-0.175	1.7	1.08				-0.423	1.02	0.0615	0.103	3.04	-0.638
-1.09	-2.76	-1.76	-0.594	-0.439	0.575				0.174	0.204	-0.476	-0.109	2.3	1.35				-0.477	-0.617	-0.413	0.02	1.33	-0.639
-1.58	-0.715	-0.982	-0.0983	0.453	-0.23				0.239	-0.216	-0.326	-0.499	1.74	2.72				-0.262	-0.856	-0.444	-0.00753	1.89	-0.09
-0.647	-1.76	0.706	-0.138	0.512	-0.448				0.0347	0.0494	-0.369	-0.678	0.638	1.2				-0.233	-0.902	-0.485	-0.884	0.627	0.106
-0.861	-0.659	-0.226	1.55	-0.387	-0.479				-0.603	-1.02	-0.327	-0.232	0.0333	-0.183				-0.502	-0.566	0.737	-1.16	1.74	-2.58
-0.741	0.253	-0.877	-0.383	-0.521	-0.308				-0.103	-0.53	-0.511	-0.828	-0.75	1.2				-0.843	-0.0895	0.796	-0.616	2.73	-0.376
-0.508	-1.43	0.303	-0.0822	-0.452	-1.23				-1.14	0.186	-0.517	-0.542	0.537	2.6				-0.317	-0.0181	-0.283	-0.0655	2.92	-0.923
-1.09	-0.865	0.734	0.239	-0.599	-1.04				-0.284	0.0932	-1.27	0.19	0.515	1.31				-0.959	1.63	0.359	-0.902	2.41	0.0268
-1.29	-1.69	-0.211	-0.202	-0.669	0.0853				-0.0583	0.702	-0.593	-0.535	0.161	0.958				-1.14	0.308	1.27	-0.211	1.59	0.178
-1.52	-1.24	-1.46	0.735	-0.662	0.019				-0.119	0.208	-0.635	0.361	0.479	1.43				-1.02	-0.931	1.78	0.393	1.97	-0.698
-2.1	-0.611	1.15	0.417	-0.609	-0.724				0.422	-0.507	-1.12	-0.0446	0.0192	1.21				-0.636	0.0588	0.471	-0.55	2.03	0.163
-1.64	-1.09	0.739	1.16	-0.494	-0.778				-0.232	0.122	-0.851	0.34	0.61	0.712				-0.596	-1.11	1.21	0.136	1.14	-1.29
-0.613	-0.911	-0.275	-0.278	-0.717	1.28				-0.948	-0.453	0.145	0.787	0.893	0.583				-0.603	-1.93	1.38	0.338	1.44	-1.56
0.277	0.446	0.689	0.149	-0.444	0.943				-0.158	-0.629	-0.814	0.503	0.0743	0.636				-0.498	-1.31	1.98	0.624	2.64	-0.935
-0.799	0.335	1.02	0.145	-0.474	-0.285				-0.106	0.0314	-0.83	1.21	0.541	0.473				-0.376	-0.505	0.577	0.299	2.75	1.91
-0.204	-0.801	0.596	-0.863	-0.554	0.0572				-1.67	0.723	-0.346	0.435	0.787	0.412				-0.883	-0.252	0.374	-0.685	5.2	1.16
-0.442	-0.494	1.81	-0.519	-0.42	-0.566				-1.64	0.00425	-0.261	0.046	0.694	-0.608				-0.903	0.214	0.181	-0.364	3.25	0.3
-0.938	-0.979	1.51	-0.191	-0.212	0.424				-0.886	-0.367	-0.535	-0.168	0.873	0.37				-1.01	0.201	0.551	0.0381	2.85	-0.655
-1.14	0.256	0.589	-1	0.886	-0.233				-1.7	-0.316	-1.08	-0.133	0.109	-0.402				-0.74	-0.162	1.01	0.287	1.74	-1.53
-0.663	-3.01	0.508	-0.598	1.9	1.04				-1.08	0.66	-1.33	-0.396	-0.424	0.129				-0.969	-1.38	1.22	-0.592	2.23	-0.126
-0.683	0.301	-0.0467	0.0538	1.11	-0.0378				-1.13	-0.518	-1.42	-0.417	-0.0589	-0.76				-1.23	-2.52	2.25	0.404	0.392	-0.386
-1.08	-1.46	-1.14	-0.932	1.37	-0.651				-0.735	-0.443	-1.81	-0.994	-0.965	-0.864				-0.967	-0.89	-0.88	-0.953	0.599	1.96
-1.25	-1.88	-1.36	-0.695	1.15	-1.11				-1.38	-0.228	-2.04	0.309	-0.586	1.04				-0.885	-0.575	0.306	-2.57	3.12	-0.669
-1.82	-0.748	0.186	-1.22	1.03	-0.618				-1.17	0.146	-1.2	0.736	0.0433	-0.987				-0.573	0.621	0.447	-1.23	2.86	1
-2.1	-2.01	-0.31	-0.881	0.681	-0.846				-2.22	-1.35	-0.928	0.888	-0.0753	0.393				-0.562	-0.621	1.41	-1.29	1.06	2.04
-1.63	-2.76	-0.524	-1.72	0.287	-0.0905				-0.157	0.124	-1.13	0.364	-0.0448	0.0899				-0.656	-3.24	2.05	-1.16	1.4	1.14
-1.67	0.988	-1.71	-1.45	0.46	-0.99				0.705	0.465	-1.09	0.087	0.0535	0.59				-0.867	-0.668	0.287	-0.826	0.0553	1.19
-1.95	0.785	-1.34	-1.24	0.466	-1.66				0.0431	-0.16	-1.93	0.644	0.841	-1.46				-0.671	0.769	0.572	0.614	0.958	1.54
-2.55	0.335	-0.153	-1.06	0.0652	-0.78				0.194	-0.861	-1.49	0.899	1.75	-1.54				-0.609	-0.669	2.44	-0.793	0.594	1.26
-2.85	-0.339	0.0321	-0.687	0.371	-1.7				0.352	-0.632	-1.44	0.679	1.77	-0.829				-0.918	0.168	0.368	-0.0152	-0.369	2.13
-3.21	-1.83	-1.35	-0.826	0.673	0.274				-0.259	-0.194	-1.7	0.573	2.65	0.443				-1.12	-1.53	0.253	-0.404	1.18	1.96
-3.43	-1.45	-1.66	-0.89	1.34	-0.451				0.317	-0.358	-0.906	1.53	1.96	-0.479				-1.26	-1.01	0.274	-0.202	3.34	2.29
-3.13	-1.32	-1.03	-1.84	0.595	0.77				-0.842	0.964	-0.856	0.724	1.99	0.504				-1.68	0.0632	0.0901	-1.05	2.11	2.44
-2.42	-3.57	-1.01	-1.25	1.36	-0.329				-1.57	0.298	-1.02	0.16	1.93	1.2				-2	0.471	-0.285	-0.645	1.62	1.61
-1.64	0.129	-1.95	-0.874	1.58	-0.646				-2.01	-0.386	-0.939	0.562	1.34	2.26				-1.33	-1.32	0.0654	0.0804	0.389	1.46
-0.737	-2.47	-1.97	-0.207	0.934	-1.63				-1.26	-1.03	-0.64	1.17	1.35	-1.11				-1.25	-2.16	0.431	-1.67	0.598	0.883
-1.21	-1.63	-0.598	0.215	0.694	-0.953				-1.19	-0.317	-1.41	0.299	1.95	-1.38				-1.31	-0.919	1.35	-1.95	0.408	3.41
-1.12	-0.649	-1.37	0.249	0.388	-0.339				-2.21	-0.136	-0.18	0.44	2.14	0.531				-1.53	-1.3	-0.806	-1.25	-0.374	1.1
-0.898	-1.23	-2.13	0.825	0.251	0.387				-2.47	-0.697	-0.607	0.0679	1.38	1.84				-1.71	1.48	0.354	-0.954	0.571	0.851
0.416	-1.79	-0.96	1.33	-0.039	-1.26				-2.21	0.197	-0.756	0.91	2.12	2.56				-1.44	-1.89	1.52	-0.374	-0.358	1.96
0.687	-2.55	-0.524	1.44	0.31	-2.06				-2.96	-0.312	-1.04	1.32	3.82	-0.152				-1.2	-1.46	0.913	1.44	0.0242	0.457
0.925	-2.7	-0.777	1.67	0.987	-2.02				-2.8	-0.664	-0.153	1.82	5.17	0.107				-1.4	-1.3	0.146	0.796	-0.497	-0.0416
1.04	-2.5	-0.894	1.39	0.882	-1.13				-2.87	-0.222	0.0151	1.1	3.8	-0.273				-0.437	0.591	1.02	0.343	-0.942	0.21
1.68	-1.98	-1.99	1.6	0.943	-1.39				-1.97	-0.562	-0.669	0.601	3.54	1.91				-0.0967	-1.79	2.47	0.542	0.56	0.407
1.35	-1.39	-0.622	0.485	0.272	-0.391				-1.6	-0.506	-0.859	1.33	4.02	0.914				-0.192	-0.722	-0.617	0.499	1.47	1.07
1.16	-0.474	-1.96	1.01	0.382	-0.18				-2.28	-0.378	-0.986	2.14	4.27	0.682				-0.488	-0.753	0.638	-0.174	4.21	3.13
0.0417	0.973	-0.315	0.812	0.027	-0.741				-2.7	0.00861	-0.481	2.2	3.46	1.67				0.0407	-0.138	0.233	-0.679	3.74	2.69
-0.0556	-0.538	-0.51	-0.126	0.708	0.0148				-1.3	1.19	-0.525	3.04	3.21	-0.118				0.325	-3.49	0.446	0.0403	2.51	2.98
-0.871	0.627	-0.78	1.06	0.679	-0.68				0.0543	1.42	-0.469	3.1	4.53	0.12				-0.0356	-2.97	0.222	-0.381	1.79	3.41
-1.08	-1.96	0.234	0.976	1.89	-0.7				-0.521	0.277	-0.689	2.59	6.06	0.274				-0.575	0.777	0.411	-0.263	1.05	2.91
-1.97	-0.5	-0.528	0.53	2.16	-2.87				-0.374	0.518	-1.49	2.37	7.51	0.0835				-1.33	-0.818	0.9	-0.807	0.918	2.29
-2.72	-1.43	-1.07	0.708	2.69	0.179				-1.1	1.09	-1.16	2.7	5.31	0.777				-1.19	-0.492	-0.934	0.464	1.35	2.1
-1.78	0.0199	-0.916	1.7	2.2	-0.8				-2.09	1.49	-1.81	2.26	4.72	2.12				-1.5	-2.75	-0.394	0.886	0.971	3.89
-2.14	-0.657	-1.01	2.16	2.46	-1.23				0.395	0.911	-0.856	2.36	4.16	0.923				-0.765	-1.18	-1.2	0.362	3.19	3.84
-0.86	0.0467	-0.801	1.47	2.14	-0.213				-0.202	1.11	-0.603	2.74	2.98	1.11				-0.148	-1.8	-1.18	0.994	3.12	4.48
1.45	-0.0545	-0.977	2.23	2.33	-1.04				-1.62	1.28	-0.839	1.74	1.66	2.14				-0.146	-2.5	-0.502	0.87	2.05	4.62
1.38	-1.08	-1.11	0.428	1.95	-0.349				-0.519	1.54	-1.43	2.3	1.71	2				-0.389	-1.76	-1.08	0.293	1.2	3.62
1.52	-0.433	-2.54	1.41	1.39	1.14				0.761	1.4	-1.97	1.94	2.14	2.1				-1.09	-1.48	-1.63	-0.559	2.07	3.72
2.13	-1.17	-0.72	2.12	1.3	2.03				0.567	1.39	-2.34	1.25	1.98	2.39				-1.33	0.877	-1.6	-0.914	0.634	5.38
0.956	-1.52	-0.262	1.57	1.93	0.722				0.388	1.88	-1.1	0.322	1.18	3.34				-1.53	0.863	-2.55	-1.78	0.87	7.27
0.179	0.454	0.0143	1.42	2.71	0.77				-0.986	1.11	-1.58	1.05	3.16	3.99				-1.6	-1.3	-1.45	-1.13	1.46	5.69
-0.804	0.522	1.68	1.27	2.28	-0.432				-2.04	0.539	-1.57	1.51	2.66	2.88				-1.88	0.994	-2.7	-1.26	0.162	4.72
-0.984	-0.0512	0.917	1.07	2.26	0.0855				-2.02	1.17	-0.676	0.782	1.59	5.12				-1.95	-0.8	-3.09	-1.79	0.884	5.24
-1.35	1.19	1.3	1.91	2.57	0.399				-2.75	1.06	-0.203	0.79	1.3	4.92				-2.25	0.585	-1.71	-1.13	2.27	4.94
-1.21	1.44	1.3	1.99	2.52	-0.426				-0.307	1.31	-0.974	-0.0545	0.556	3.14				-2.48	1.89	-2.96	-2.58	2.5	5.06
-0.224	-0.00392	-1.39	1.4	1.45	1.08				-0.42	1.2	-1.4	-0.877	-0.366	2.62				-1.93	-0.0604	-3.34	-2.1	2.52	6.91
-0.856	1.14	-0.24	0.225	0.626	1.72				-0.507	1.16	-0.449	-1.26	-0.705	2.85				-1.03	0.298	-3.08	-0.326	1.95	7.08
-0.98	-1.15	-1.27	1.16	0.637	1.68				-1.32	1.5	-0.117	-1.1	-1.52	2.29				-0.822	-0.715	-3.42	-0.65	0.864	6.39
-0.872	0.658	-0.266	1.03	0.214	-0.119				-1.38	1.62	-0.736	-0.833	-2.17	3.71				-0.019	2.71	-1.56	-1.36	1.42	6.3
-0.512	-0.0666	-0.395	1.19	0.195	0.809				-1.05	0.334	-0.222	-0.671	-2.06	2.94				-0.194	1.69	-2.32	-2.28	2.15	4.96
-0.0465	1.74	-0.106	1.93	1.2	0.621				-2.26	0.854	0.0374	-0.313	-3.4	2.38				-0.456	2.01	-1.97	-0.615	1.81	5.16
0.462	0.801	-0.782	1.5	1.02	-0.27				-1.27	0.909	0.195	-0.804	-2.67	2.05				0.512	3.4	-1.62	-0.703	1.16	5.55
-0.11	-0.487	-1.05	1.29	1.34	0.625				-0.582	0.252	0.101	-0.75	-1.87	3.55				0.64	0.576	-0.499	-0.927	0.991	6.23
-0.505	1.09	-1.24	3.61	1.65	1.02				-0.0246	0.84	-0.0543	0.465	-0.292	2.16				0.734	0.284	-1	-0.292	1.37	5.16
-1.36	1.6	-0.284	2.33	1.81	-0.353				-1.77	0.785	0.571	-0.363	-0.0421	2.14				2.88	-0.0374	0.751	0.572	1.55	5.09
-1.76	1.34	-0.0408	1.46	0.781	0.469				-0.93	0.811	0.0126	0.155	0.386	3.29				1.98	1.77	-0.302	1.84	1.17	4.12
-1.72	1.09	-0.503	2.71	0.626	0.0455				-1.02	1.04	0.689	0.212	-0.211	3.83				1.15	1.6	-1.51	0.544	0.0791	3.37
-1.66	0.746	0.973	3.88	0.474	1.8				0.0331	0.33	0.968	1.06	-0.215	3.35				1.12	0.858	-0.36	1.83	1.69	3.85
-1.33	1.51	-1.59	4.26	0.223	0.706				-0.505	0.307	0.591	1.17	-1.22	4.35				0.643	1.79	0.783	2.22	1.5	5.08
-1.03	0.00441	1.23	2.8	0.377	-1.45				-1.04	1.88	-0.00883	1.35	-0.741	3.55				0.987	3.61	0.205	3.17	0.491	4.68
-1.1	0.633	-0.69	4.27	0.614	-1.39				-1.02	0.547	0.171	1.79	-1.02	3.69				0.848	0.467	0.514	4.29	1.1	3.78
-0.491	1.52	-0.833	3.93	0.11	0.648				-1.01	1.05	0.0381	2.17	-0.926	3.9				0.813	0.483	0.516	3.08	0.87	5.9
-0.103	-0.484	-1.54	4.17	-0.422	1.2				0.0607	0.973	0.285	2.79	-1.65	1.81				0.259	1.38	1.14	3.38	0.411	5.59
0.623	-0.186	0.871	3.72	-0.477	1.33				-0.74	2.74	-0.0103	2.81	-2.07	3.8				-0.372	2.36	2.46	3.93	0.316	4.69
1.17	1.27	0.0726	4.71	-0.504	-0.463				-0.538	1.57	-0.154	2.55	-1.7	4.04				-1.2	0.884	0.715	3.22	1.86	3.02
0.571	0.758	-0.00491	3.71	-0.0147	-1.93				-1.22	1.23	0.369	2.24	-1.31	4.85				-1.02	1.37	-0.416	4.64	1.27	4.48
0.439	0.532	1.47	3.34	0.833	0.0426				-0.0737	1.22	-0.464	2.21	-0.976	4.7				-0.0597	0.375	0.161	2.7	2.28	4.17
0.806	2.73	0.734	2.46	0.618	1.49				0.208	1.82	-0.298	0.969	-0.836	2.52				0.289	0.568	0.607	5.08	3.68	3.93
0.814	1.75	0.34	2.92	1.09	-0.517				0.495	1.18	-0.0462	1.26	-0.0994	3.72				-0.448	2.12	1.3	3.23	3.84	3.36
0.786	-0.282	0.114	3.25	1.36	0.126				0.433	1.77	-0.197	1.24	-0.341	4.34				-0.259	3.51	2.58	2.3	3.6	3.14
1.77	1.74	0.0672	1.43	1.46	0.848				-0.684	0.997	-0.432	1.84	-0.365	4.87				0.695	1.48	1.34	0.604	2.45	3.51
0.926	1.11	1.72	1.77	1.05	2.96				-1.09	1.23	-0.0415	1.96	0.0431	2.37				0.939	0.39	1.61	1.77	2.05	3.25
1.24	-0.949	1.25	2.36	1.5	1.17				-1.19	1.12	0.202	1.79	-1.12	3.27				1.44	1.92	0.624	1.09	2.45	4.4
2.31	-0.225	0.417	1.32	1.7	1.28				-0.507	0.33	0.103	1.42	-1.28	4.03				1.3	0.753	1.08	1.59	0.832	3.05
2.38	0.146	0.122	1.2	1.21	0.382				-1.58	0.449	0.0166	1.25	-1.36	3.77				0.227	4.43	-1.26	0.102	1.36	3.75
1.91	-0.39	-0.62	0.583	0.603	0.686				-2.14	0.287	0.753	0.823	-1.88	3.71				-0.252	3.03	-0.086	0.835	1.42	3.49
1.04	0.755	0.359	1.69	0.569	0.622				-1.49	0.738	0.926	-0.138	-1.32	3.95				-0.608	4.21	-0.216	4.4	0.589	3.63
1.7	1.63	0.768	1.59	0.711	0.877				-0.735	2.1	0.999	0.229	-1.3	4.31				0.0723	4.53	-1.55	4.91	1.06	2.96
1.01	0.316	0.392	1.16	0.231	1.29				-0.504	1.69	1.29	1.08	-1.77	3.12				0.33	5.17	0.262	6.13	1.2	4.3
1.81	-0.273	-0.459	0.931	1.09	0.465				3.2	2.56	1.49	1.32	-2.17	3.19				0.895	3.15	0.48	5.21	1.28	3.77
2.02	1.8	-0.157	0.976	1.48	1.1				6.44	3.13	1.27	2.39	-2.07	2.91				0.533	1.58	-1.42	4.53	-0.384	5.39
1.11	0.41	-0.104	1.52	1.1	-0.664				5.58	2.09	0.852	3.04	-2.42	1.74				0.627	3.89	-0.031	3.44	0.568	5.38
0.486	0.0336	1.15	2.03	0.566	-0.163				4.76	2.46	1.35	2.04	-2.15	1.68				0.244	2.54	1.16	3.06	-0.162	5.54
0.0677	1.13	-0.304	1.93	0.604	-0.645				3.4	1.9	1.53	2.54	-0.531	2.68				0.539	4.21	-0.3	2.93	0.0499	5.02
0.428	0.791	-0.142	2	0.0189	0.372				2.18	2.56	0.515	3.52	-0.61	2.6				-0.0672	3.97	-0.494	2.02	-0.391	2.99
1.72	0.302	-0.406	0.701	-0.409	0.000674				1.72	2.43	0.288	2.63	0.568	3.09				-0.0663	2.44	-0.893	2.5	0.628	2.89
1.59	-0.733	0.551	1.53	-0.1	-0.905				1.3	2.42	0.829	2.38	0.667	2.72				-1.03	2.56	0.464	2.37	1.64	2.56
0.568	0.629	-1.36	0.141	0.224	-0.182				0.836	1.62	1.86	2.75	0.843	5.25				-0.924	2	0.167	1.36	1.71	4
-0.226	-1.68	0.538	0.553	0.0509	0.775				0.998	2.2	0.795	2.18	-0.556	4.16				-0.66	4.47	0.797	1.82	0.961	2.59
-0.694	-1.31	-0.0805	1.27	0.178	1.86				1.23	1.35	1.09	0.946	0.123	4.14				-0.472	3.86	0.0845	-0.134	1.3	3.48
-0.824	-0.57	0.676	0.603	0.514	2.4				-0.377	0.797	0.988	0.448	0.461	3.41				-0.619	2.55	-0.564	-0.208	1.59	2.29
-0.977	0.473	-0.324	0.288	-0.335	2.03				1.26	0.99	0.496	1.2	0.000843	4.35				-1.51	3.26	-0.138	1.04	0.436	2.88
-1.23	0.329	0.246	1.77	-0.327	2.25				2.75	0.702	0.805	1.18	0.0643	2.36				-1.89	3.89	0.566	0.848	0.306	1.74
-0.401	0.00134	-0.873	1.77	-0.255	0.255				1.76	2.14	0.472	1.36	0.614	3.7				-1.69	3.61	-0.848	1.18	0.328	2.3
1	-2.86	-0.585	0.7	-0.188	1.3				0.873	2.17	1.1	1.48	2.16	2.02				-0.844	3.89	0.155	2.18	-0.894	2.54
1.23	0.854	-0.505	0.581	-0.49	1.31				0.645	2.13	1.15	0.706	3.69	1.81				-0.253	4.25	0.959	1.39	-0.431	2.34
0.0389	-0.109	-1.09	0.856	-0.62	0.00539				-0.574	0.702	0.412	0.89	4.15	2.85				-0.153	3.94	-0.186	-0.172	-1.02	1.38
-0.452	-0.932	-0.9	1.2	-0.451	0.266				-0.591	0.842	1.31	0.456	5.84	3.42				-0.288	4.87	-0.536	2.04	-1.08	2.49
-0.995	-0.794	-0.948	1.11	-1.07	0.472				-1.58	1.67	-0.157	0.374	5.49	2.71				-0.628	3.81	0.307	2.01	-0.643	3.71
-0.974	-0.125	-0.528	0.801	-0.534	1.42				-1.81	1.32	-0.441	0.379	3.68	1.38				-0.396	4.17	0.00091	2.31	-0.729	3.2
-1.04	-1.58	0.357	1.22	-0.452	0.752				-2.06	2.55	-0.773	0.343	4.06	2.57				0.00391	2.75	0.535	4.05	-0.162	3.32
-1.25	-0.888	-2.16	1.28	-0.946	0.746				-1.96	0.932	-0.0427	0.176	2.85	3.78				-0.431	3.04	0.402	4.46	-0.827	4.56
-1.4	0.624	-2.41	1.57	-1.38	0.192				-0.924	1.38	-0.432	-0.232	1.66	2.36				-0.414	0.955	-1.51	3.75	-0.623	1.94
-1.96	-1.4	-0.186	1.54	-1.38	-0.0576				-0.22	1.45	-0.77	0.414	0.182	2.51				-0.504	3.2	0.885	4.23	-0.352	1.7
-0.664	-0.608	-1.37	1.56	-1.47	1.03				0.165	1.57	0.475	1.63	0.0471	3.08				-0.76	4.71	0.195	2.75	-0.544	2.91
-0.995	-0.0857	-0.183	1.24	-1.39	0.933				0.344	2.04	0.606	0.424	-0.011	1.66				-0.677	4.62	0.387	3.38	1.17	1.68
-1.78	0.916	-1.26	0.538	-1.14	1.27				-0.334	2.04	-0.182	0.874	-0.053	3.08				-0.104	2.86	0.512	2.76	2.23	2.43
-0.348	-2.31	-1.47	-0.0363	-0.827	1.05				-1.35	1.88	-1.06	1.13	4.84	2.1				-0.187	3.16	-0.000246	3.81	2.11	0.0635
-0.0109	-0.25	-0.819	0.838	-0.474	1.72				-3.05	0.943	-0.429	0.986	4.68	3.29				-0.272	2.95	1.66	3.1	2.4	2.32
0.254	0.517	-0.756	0.35	-0.0556	1.16				-2.96	2.04	0.0865	0.721	4.55	3.96				0.0454	4.08	0.939	2.84	1.64	2.2
-0.327	-1.23	0.0427	-1.29	0.23	0.442				-1.83	1.33	-0.0343	0.721	3.85	4.01				-0.0723	3.54	0.635	1.41	2.14	2.33
-0.542	-0.923	-0.89	0.575	-0.186	-0.86				-1.84	1.74	0.354	1.66	2.39	3.49				0.135	3.14	-0.00589	1.27	2.1	4.26
-0.564	1.18	-1.35	-0.218	0.593	0.308				-1.09	1.63	-0.0691	1.64	1.44	3.2				0.0794	4.13	-0.155	0.767	1.07	3.07
-1.01	-0.41	-0.854	0.349	0.845	1.51				-1.16	1.49	-0.239	1.8	0.33	5.42				-0.183	3.87	0.0641	0.71	0.243	3.45
-0.621	0.45	0.0268	0.874	0.129	0.87				-0.455	0.916	-1.61	2.17	1.58	5.23				-0.661	5.09	-0.392	0.581	0.896	3.29
-0.941	-2.39	-0.19	-1.16	-0.578	0.707				-0.355	1.38	-1.33	1.86	2.15	5.2				-0.428	3.92	0.52	1.71	0.344	3.53
-1.3	-2.26	1.15	0.605	-0.443	0.348				-0.757	0.596	-0.695	1.84	2	3.88				0.105	4	0.337	1.15	0.398	4.25
-1.86	-0.491	-0.378	0.79	-0.678	0.0406				-0.802	1.62	0.476	1.1	2.7	3.67				0.209	2.98	0.316	0.791	0.474	4.25
-1.33	-2.91	0.0546	-0.694	-0.655	-0.252				-0.404	0.144	0.0814	1.41	2.5	4.13				0.293	4.83	0.609	1.54	-0.609	2.62
-1.6	-4.25	-0.153	-0.6	-0.611	-0.772				-1.63	-0.3	-1.06	1.46	2.64	1.73				0.442	4.82	0.39	1.1	0.00889	4.45
-1.3	-0.916	0.593	0.154	-0.455	0.645				-1.97	-0.0116	-1.46	1.28	1.66	3.43				0.488	4.39	-1.61	0.761	0.838	2.69
-1.11	-0.0272	0.962	0.318	0.0554	0.213				-1.39	1.15	-1.57	1.43	1.32	4.01				0.946	6.39	-2.27	1.68	-0.724	2.34
-1.8	-2.35	0.571	-1.22	-0.106	0.148				-2.4	1.61	-1.16	1.59	2.65	4.47				0.624	4.17	0.156	2.79	-0.0592	1.33
-1.08	-2.18	-0.778	-0.187	-0.611	0.354				-2.38	1.69	-1.5	1.36	3.09	5.74				0.374	4.79	-1.03	2.93	1.37	2.51
-0.126	-2.57	-0.243	-0.327	-0.781	0.703				-1.08	2.12	-0.726	0.856	4.16	4.16				0.576	4.48	-0.819	3.14	3.55	3.46
0.114	-2	-0.529	-0.693	-0.768	0.546				-2.02	2.02	0.148	1.13	3.38	3.32				-0.142	3.78	0.739	1.82	4.45	2.61
-0.459	-0.662	-1.32	0.132	-0.978	-1.22				0.786	2.55	-0.35	0.22	1.95	2.99				-0.464	3.12	0.994	2.77	4.97	1.78
-1.13	-2.74	0.383	0.25	-0.996	-0.32				2.29	2.49	-0.127	-0.173	1.32	3.93				-0.375	5.26	-0.659	2.77	2.38	2.77
-1.11	-2.19	0.511	1.25	-1.02	0.296				0.51	2.65	-0.97	0.589	-0.559	4.62				-0.0206	6.41	0.0438	2.52	2.13	3.12
-0.931	-2.3	-1.17	1.12	-0.984	-0.293				-0.319	2.55	-1.03	0.246	-0.983	4.9				-0.00959	5.69	-1.36	3.65	1.01	2.35
-0.429	-0.822	-0.582	-0.131	-1.35	-0.199				-0.376	2.6	-1.58	0.262	-1.82	4.56				0.647	5.5	-1.1	2.26	0.825	1.3
0.671	-1.64	-0.369	0.657	-1.45	0.221				-0.866	1.34	-1.08	-0.194	-1.94	2.66				0.84	5.14	0.25	0.0946	0.456	2.89
0.935	-1.53	-0.573	-0.0835	-1.52	0.0165				-0.99	2.12	-1.21	0.119	-0.0833	4.15				0.676	3.38	-0.865	0.681	3.57	2.29
0.963	-2.7	-1.15	-0.606	-1.29	-0.157				-1.62	1.35	-1.93	-0.0411	-0.839	4.49				0.197	4.42	-1.34	-0.226	6.21	3.38
0.229	-1.56	0.253	0.386	-0.64	-0.411				-1.08	2.21	-1.42	1.09	-0.766	2.85				-0.0551	4.23	-1.07	-0.0884	4.76	2.69
0.428	-0.535	0.92	0.11	-0.828	-1.07				-2.23	1.88	-1.47	0.53	-0.413	2.29				0.247	6.09	-0.387	-1.66	5.25	3.72
0.0217	-0.16	-0.0757	-0.192	-0.0225	0.0128				-0.0199	1.6	-1.19	-0.195	-1.01	4.25				0.126	5.58	-1.35	-1.29	4.7	3.92
-0.322	-0.637	-0.418	0.0975	-0.347	0.175				-0.223	1.46	-0.717	-0.882	-2.18	4.4				-0.214	3.87	0.11	-0.987	4.85	4.04
-0.526	-1.11	0.55	1.03	-0.593	-0.311				-1.42	1.72	-0.668	-0.811	-2.47	3.69				0.0858	4.79	-1.08	-0.727	3.75	2.97
-0.825	-1.09	-0.275	1.2	-0.818	-0.0774				-1.63	2.36	-0.438	-0.905	-2.92	3.5				0.33	4.71	-0.682	-0.0962	4.4	2.98
-0.699	-0.94	0.342	1.31	-0.53	1.05				-1.67	2.01	-0.143	-0.743	-1.99	3.65				0.163	5.07	0.351	-1.44	5.95	3.5
0.0732	0.147	-0.163	1.34	-0.428	0.00781				-2.16	2.5	-0.69	-0.17	-1.78	2.42				-0.128	4.45	-0.774	-0.906	5.28	2.6
1.12	-1.12	-0.367	0.744	-0.62	-0.798				-1.22	2.16	0.263	0.315	-0.241	2.66				-0.0733	6.44	0.119	-0.746	3.63	2.52
1.03	-1.06	0.648	0.705	-0.307	0.528				-0.178	1.97	-0.402	-0.48	0.261	2.17				-0.0125	5.37	-0.155	-0.0386	1.72	0.385
1.1	-0.506	-0.339	1.61	-0.254	1.6				0.296	1.93	-0.0677	-0.189	-0.341	2.27				0.273	4.96	2.33	-1.64	1.35	2.62
0.753	0.833	-0.305	1.58	0.137	0.51				-0.298	1.14	0.825	-0.514	-0.35	2.48				0.207	4.29	-1.11	-1.69	0.39	0.768
0.332	0.583	0.294	1.06	0.363	0.893				-0.893	1.01	0.148	-0.194	0.0202	4.49				-0.129	3.63	-1.25	-0.627	1.45	3.85
0.0969	-1.73	0.941	2.07	0.225	-0.359				-1.34	1.93	-0.286	-0.605	-0.034	4.52				-0.567	3.9	-2.37	0.0796	5.5	3.15
0.435	-0.366	-0.0916	1.73	0.404	-0.638				-1.75	1.73	0.832	-0.0259	-1.51	3.39				-0.4	5.32	0.0482	-0.896	7.34	2.97
0.187	-2.27	-1.05	1.63	0.149	-1.49				-2.07	1.14	-0.735	0.559	-2.39	2.59				-0.0714	5.49	-0.0992	0.798	6.04	3.88
0.463	-0.513	0.585	1.12	-0.569	0.0745				-2.5	0.506	-0.745	-0.269	-2.4	2.43				-0.113	5.07	-0.298	-0.109	5.43	1.37
-0.26	0.428	-1.67	1.94	-0.891	-0.144				-2.35	1.22	1.08	-0.118	-2.93	3.38				0.242	5.34	0.773	0.397	4.54	2.53
-0.355	-0.424	-0.965	0.322	-0.87	0.972				-2.38	2.06	-0.958	0.116	-2.76	3.65				0.0812	5.71	0.197	-0.868	3.58	2.31
-1.07	-0.75	0.0831	1.84	-0.54	0.151				-3.74	0.822	-0.229	0.0493	-2.44	2.67				0.0989	4.03	0.745	0.682	3.76	3.13
-2.27	-1.53	-0.872	2.07	-0.763	-0.442				-3.47	1.94	0.042	0.379	-2.12	6.08				0.212	4.69	-0.336	1.1	3.6	1.9
-1.54	0.388	-1.81	2.74	-0.244	-1.13				-1.56	2.13	0.598	-0.42	-2.18	3.28				0.085	4.81	-0.0266	0.572	3.68	1.65
-1.61	-1.3	-1.19	0.908	-0.114	-0.225				-1.85	0.905	-0.22	-1.01	-1.58	2.65				-0.312	4.98	-0.233	0.231	2.52	2.64
-1.17	-1.09	-0.0936	0.725	-0.293	0.954				-2.81	1.19	0.803	0.033	-1.36	4.16				0.34	3.61	-0.831	0.906	2.55	2.39
-0.381	0.635	-0.768	0.82	-0.371	-0.344				-1.53	1.76	-0.915	-1.17	-1.6	3.99				0.249	2.85	-0.968	-0.0703	1.1	1.22
-0.502	0.97	-1.26	0.195	-0.402	-0.129				-1.07	1.79	0.087	-1.24	-1.61	2.75				0.0318	4.85	1.1	-0.0863	0.121	1.2
-0.6	-1.62	-1.1	0.124	0.201	0.309				-1.59	1.57	-0.327	-0.503	-0.938	3.09				-0.0518	6.14	0.837	0.747	-1.14	1.47
0.0874	-1.67	-0.45	1.09	-0.572	-0.178				-1.09	1.48	-0.789	-0.732	-1.72	2.95				-0.312	4.47	-1.08	-0.26	0.0331	1.39
-0.75	-0.0489	-1.56	1.36	-1.23	-0.14				-1.85	2.87	-0.383	-0.729	-1.98	3.22				-0.24	6.02	0.583	-0.86	-0.0414	1.97
-0.684	-0.0328	-0.757	0.259	-1.1	-0.0251				-0.186	1.4	0.0458	-0.417	-2.5	3.58				-0.847	5.31	1.15	1.33	0.643	0.654
-1.69	-0.104	-0.512	-0.522	-1.16	-0.48				0.2	1.74	-0.63	0.432	-2.44	2.87				-0.802	5.82	0.704	0.348	3.24	0.947
-0.77	0.276	-1.19	0.499	-1.12	-0.371				0.248	1.79	0.0447	0.221	-2.74	3.99				-0.426	7.47	-0.115	0.199	4.01	0.948
-0.561	-1.01	-0.697	0.172	-0.869	0.554				-0.654	0.703	-0.0291	-0.408	-0.384	5.08				-0.164	6.67	-0.713	-0.196	2.52	0.773
-1.06	0.751	-1.98	0.743	-0.592	0.0304				-1.16	1.38	-0.693	0.675	0.563	3.52				-0.319	4.43	-1.26	-1.28	3.17	1.15
-1.06	-0.739	-1.19	0.326	-0.42	1.81				-0.789	0.889	-0.629	-0.166	-0.323	2.71				-0.457	4.69	-0.778	0.0462	2.54	0.875
-2.22	0.428	-0.806	1.87	-0.118	0.153				-1.13	1.85	-0.172	0.305	0.017	2.13				-0.515	4.93	-0.74	-0.77	0.746	2.53
-2.79	1.75	-0.881	0.725	-0.721	-0.333				-1.13	1.7	0.415	-0.15	-0.135	3.81				-0.612	5.56	0.104	0.44	2.09	2.83
-2.94	1.49	-1.4	1.7	-1.13	-1.19				-1.43	1.24	-0.206	-0.162	-0.12	2.64				-0.558	6.9	1.01	0.753	1.21	1.07
-2.69	-0.877	-0.128	1.49	-0.811	0.176				-0.324	1.06	0.354	0.278	-0.616	3.71				-0.94	5.82	0.0259	0.575	0.476	0.868
-2.31	0.597	-0.559	0.493	-0.918	-0.447				0.188	1.5	0.0441	0.602	-0.965	3.15				-0.412	5.16	-0.473	0.0263	1.25	1.45
-2.32	1.23	-0.218	0.546	-0.881	0.491				-0.896	1.53	0.819	0.0132	-0.261	2.57				-0.189	5.61	-0.66	0.757	1.37	1
-2.3	-0.214	-0.688	0.471	-0.811	-0.392				-1.53	0.502	0.39	-0.248	-0.942	4.37				-0.133	7.48	-0.272	1.56	1.34	3.63
-2.22	-0.324	-0.452	1.05	-0.758	-0.0359				-2.06	1.36	0.104	0.0929	-1.83	3.02				0.169	5.37	-0.739	0.615	1.58	1.07
-2.33	-0.305	-0.914	0.773	-0.804	1.01				-0.968	1.94	-0.0515	-0.0101	-2.15	5.4				0.369	4.45	0.255	1.6	1.16	1.97
-2.74	-1.07	-1.29	0.574	-0.28	-0.291				-0.303	1.04	0.161	-0.161	-0.895	2.93				0.453	6.99	-2.05	1.14	0.796	1.89
-2.08	0.0977	-1.3	0.317	-0.756	1.06				-1.16	1.02	-0.0132	-0.799	0.277	3.75				-0.184	5.23	-1.03	-0.062	0.8	0.416
-2.03	1.82	-0.996	0.0459	-0.737	-0.373				-1.11	1.39	-0.293	-0.266	0.109	1.73				-0.193	4.19	-2.05	-0.0913	0.268	0.962
-1.81	1.34	-1.72	0.303	-1.08	0.75				-1.84	0.923	-0.29	-0.584	1.03	2.19				-0.316	4.62	-2.2	0.0519	-0.0686	2.56
-2.06	-0.201	0.276	-0.146	-0.934	0.103				-2.17	0.435	-0.432	-0.432	1.3	1.34				-0.654	4.83	-1.39	-0.24	-0.396	1.21
-2.68	0.256	0.715	-0.0566	-1.27	0.371				-0.763	0.91	-0.922	0.176	0.844	2.36				-0.859	5.81	-1.36	0.965	0.0235	1.48
-2.93	0.399	-1.2	0.00704	-0.488	-0.473				-0.689	0.925	-0.18	0.136	0.405	2.25				-0.884	6.04	-2.38	2.13	0.221	2.76
-3	0.314	-1.35	0.241	-0.124	-0.556				-1.19	0.991	-0.247	-0.941	-0.343	2.49				-1.46	4.77	-3.14	1.74	0.553	1.8
-3.04	-0.776	-0.338	0.84	0.351	-0.782				-1.28	0.928	-1.85	-0.709	-0.904	2.21				-1.53	6.75	-1.22	1.97	-0.654	2.1
-2.42	-0.671	-0.438	1.25	0.389	0.477				-0.942	0.795	-0.489	-0.357	-1.18	2.1				-0.824	7.15	0.414	2.46	-0.142	3.39
-1.74	-0.508	-0.68	0.927	0.951	-0.255				-1.35	2.02	-0.166	-0.382	-2.49	3.74				-1.1	6.12	-1.11	2.22	-0.0514	3.16
-1.12	0.313	-1.29	2.07	0.757	0.144				-2.31	1.39	-0.39	0.0777	-3.16	2.11				-1.26	5.25	-0.51	1.67	-0.359	1.96
-0.581	-0.865	-0.368	1.33	0.405	-1.11				-2.36	1.14	-0.582	0.234	-3.86	3.27				-1.09	7.46	-0.302	1.24	0.697	2.08
-0.54	-0.6	-0.627	1.61	0.472	0.551				-2.23	1.54	-0.801	0.411	-4.13	1.43				-1.13	6.33	0.0261	0.973	1.49	2.27
-1.42	-1.63	-1.84	0.837	0.97	0.775				-2.42	1.42	-0.679	0.458	-3.93	2.33				-1.14	4.44	-0.0475	2.02	0.64	3.39
-1.87	0.272	-1.23	0.548	0.618	-0.877				-1.77	1.35	-0.243	1.01	-4.34	2.04				-0.778	7.32	-1.61	0.817	1.39	2.33
-1.85	-0.225	-0.707	1.24	1.06	-0.913				-1.64	0.763	-0.255	1.16	-4.25	2.22				-0.534	5.96	-0.386	0.453	0.715	2.98
-1.15	-0.371	-1.22	0.197	0.944	-0.00408				-3.04	1.51	-0.306	1.07	-3.76	1.75				-0.085	4.85	-0.599	0.189	-0.0211	4.14
-1.04	1.83	-0.936	0.106	0.694	0.151				-1.99	1.54	0.253	0.214	-4.18	2.06				0.152	9.22	-0.862	0.56	-0.0316	4.21
-1.37	1.75	-1.8	0.839	0.509	-1.83				-2.85	0.872	0.054	0.0178	-3.38	3.13				0.101	5.15	-1.05	0.0558	0.835	4.07
-1.08	-0.136	-1.29	0.712	0.857	-0.0051				-0.18	1.25	-0.231	0.111	-3.36	1.45				-0.128	5.26	-0.588	0.535	1.59	2.38
-1.72	-1.65	-1.82	0.91	0.978	-0.697				-0.215	0.623	-0.299	0.00576	-1.98	1.2				-0.485	5.45	0.355	0.163	1.65	3.17
-2.08	1.1	-1.22	-0.000947	1.14	-0.717				-0.659	0.711	-0.341	-0.443	-0.51	2.6				-0.176	7.02	-2.04	0.53	1.69	2.88
-2.09	0.0262	-2.21	0.803	0.577	0.366				-1.72	1.94	-0.786	-0.759	-1.1	2.87				0.0155	5.99	-1.33	1.38	1.67	3.29
-1.89	0.715	-3.14	1.31	0.0918	-0.743				-1.57	0.49	-0.642	-0.286	-1.16	1.95				-0.000254	5.61	-0.502	-0.206	0.539	4.16
-2.04	0.38	-2.8	-0.546	-0.144	0.506				-2.48	0.951	-0.976	-0.369	-1.21	0.865				0.139	4.66	-1.25	0.555	0.863	2.53
-1.86	0.709	-1.81	0.253	-0.514	2.24				-3.23	1.14	-1.02	-0.285	-1.29	1.49				-0.226	5.77	-2.37	0.957	0.923	2.99
-2.17	0.386	-1.91	0.086	-0.0823	0.576				-3.06	1.56	-1.73	-0.355	-1.81	1.1				-0.554	5.21	-5.27	0.349	1.91	2.82
-2.16	-0.0232	-1.71	0.961	0.179	0.864				-2.78	0.646	-1.4	-0.934	-2.39	1.42				-0.892	5.62	-1.2	0.967	3.17	2.21
-2.03	-2.79	-1.61	0.571	0.843	0.974				-3.15	0.875	-0.692	-0.684	-2.27	2.52				-1.31	5.33	-0.801	2.05	1.91	3.03
-1.49	-2.19	-1.09	1.43	0.655	2.53				-2.58	1.15	-0.85	-0.522	-2.45	3.4				-1.1	5.77	-0.0826	2.33	1.46	2.43
-1.47	-0.0254	-1.47	0.807	0.876	1.99				-2.3	0.882	-1.45	-1.08	-1.45	2.87				-1.36	5.4	-0.675	1.37	3.02	2.13
-1.66	0.389	-1.65	0.74	0.604	1.52				-1.55	1.08	-0.786	-0.869	-0.535	2.24				-1.74	5.38	-1.19	-0.115	4.03	2.78
-2.3	1.05	-2.07	0.865	0.787	0.992				-2.05	0.833	-1.29	-0.759	0.461	1.73				-1.87	5.78	-0.973	1.79	3.57	3.6
-2.95	-0.02	-1.34	2.24	0.736	0.324				-2.42	1.5	-0.352	-0.642	-1.06	2.52				-2.05	5.06	-1.29	1.93	5.02	1.95
-3.66	-0.488	-2.31	1.68	0.885	-0.302				-2.17	1.14	-0.492	-0.907	-1.19	2.15				-2.14	4.79	-1.56	1.16	4.43	1.96
-3.83	-1.07	-1.73	1.19	1.41	-0.617				-2.96	1.44	-1.43	-1.54	-2.03	3.54				-1.89	4.74	-1.11	1.75	5.4	2.62
-3.02	-0.844	-0.471	1.5	0.902	1.36				-4.25	1.78	-1.37	-1.37	-1.41	2.88				-2.35	4.24	-0.555	1.75	3.46	2.63
-1.98	-0.694	-1.61	0.597	1.15	1.93				-3.69	1.94	-1.91	-2.52	-1.04	1.51				-2.53	4.72	-0.64	0.979	3.67	2.82
-2.22	-0.161	-1.76	0.717	0.945	2.17				-2.37	1.4	-1.81	-1.9	-0.799	2.72				-1.96	6.08	0.0904	1.11	3.95	2.49
-2.16	0.366	-0.78	1.31	0.742	1.28				-0.0388	1.63	-0.919	-1.66	-0.0261	2.8				-1.71	4.98	-1.57	1.63	4.37	3.45
-2.9	0.843	-2.08	1.6	0.765	1.38				-1.13	1.12	-1.18	-1.36	1.32	3.92				-1.75	4.38	-0.575	2.04	3.95	2.22
-3.64	-1.05	-1.07	1.28	1.01	1.76				-1.76	1.5	-1.63	-1.46	3.98	4.86				-1.88	4.93	-0.952	2.38	4.56	2.61
-4.5	-1.18	-1.82	1.82	0.443	0.085				-0.979	2.06	-1.65	-0.468	5.14	4.41				-1.87	5.63	-2.71	2.78	4.06	2
-4.6	-1.25	0.0228	1.15	0.0439	1.37				-2.11	1.14	-1.39	-0.645	3.8	3.32				-2.37	2.63	1.15	3.65	2.34	2.98
-3.88	-1.75	-2.28	1.28	-0.044	0.966				-2.46	0.697	-1.51	-1.09	3.45	4.96				-2.32	5.75	-0.4	2.94	2.06	1.96
-3.37	0.853	-1.04	1.23	0.414	1.5				-3.15	1.47	-1.89	-1.13	2.31	3.4				-2.64	6.41	0.331	2	1.28	2.05
-3.02	0.014	-1.05	0.91	0.174	1.08				-3.36	0.77	-1.29	-0.817	2.46	1.75				-2.81	6.13	-0.177	0.424	0.883	0.967
-3.12	0.649	-0.837	2.42	0.172	1.39				-3.54	0.546	-1.44	-0.129	3.02	3.4				-2.93	6.81	-1.4	-0.292	0.685	2.28
-3.34	0.189	-1.18	1.75	0.214	2.12				-2.12	1.24	-0.635	-0.528	2.32	4.05				-3.12	5.92	-0.882	1.01	2.5	2.01
-3.94	-0.191	-1.74	2.01	-0.388	1.52				-2.43	0.394	-1.13	-0.666	1.83	3.96				-2.99	4.84	-1.39	0.958	3.09	3.81
-4.51	-0.866	-1.31	2.33	-0.0394	1.12				-2	0.127	-0.766	-1.44	1.66	2.18				-3.28	5.27	0.708	1.83	2.18	2.91
-3.54	-0.124	-0.978	2.43	-0.333	0.842				-1.42	0.294	-1.74	-0.417	1	3.83				-2.53	5.79	1.92	1.16	1.55	4.14
-2.73	0.177	-0.792	1.95	0.0417	-0.0452				-1.62	0.545	-1.13	0.215	1.5	2.95				-2.88	3.95	0.751	1.07	1.75	2.88
-2.69	1.47	-2.23	1.3	-0.293	-0.33				-2.5	0.351	-0.748	0.423	1.28	2.58				-2.87	6.19	0.757	1.07	1.41	3.84
-2.24	0.336	-0.995	1.2	0.13	0.304				-3.47	1.05	0.806	0.594	2.06	2.52				-3.2	6.25	1.83	2.38	1.4	2.85
-1.97	0.00555	-2.44	1.48	-0.0484	0.97				-2.52	0.817	0.356	0.893	0.783	2.85				-3.64	3.76	-0.209	2.23	1.89	2.1
-1.66	-0.49	-0.527	0.529	0.0211	1.63				-2.66	0.932	-0.0968	0.216	1.05	2.74				-3.28	5.22	1.14	2.58	3.83	2.93
-1.96	-1.73	-0.801	1.4	0.627	1.9				-3.61	0.581	0.218	0.417	2.63	3.94				-3.05	6.33	0.424	1.55	2.41	2.96
-2.22	-1.05	-0.652	1.29	0.321	1.5				-3.01	0.809	0.209	0.00226	3.06	4.18				-2.83	4.65	0.245	2.06	2.1	1.38
-1.7	1.32	-1.5	0.346	0.158	2.52				-2.76	1.37	0.0236	0.24	2.65	4.14				-2.29	4.37	0.424	-0.4	1.42	2.46
-1.45	0.387	-0.381	0.242	0.233	0.916				-0.811	0.607	0.574	-0.392	1.62	3.2				-1.79	5.94	-0.747	1.72	0.564	3
-1.34	0.925	-1.83	-0.205	0.215	0.352				-1.24	1.61	-0.559	-1.48	1.84	2.68				-1.75	3.28	-1.95	2.17	-0.47	2.65
-1.44	-0.948	-0.349	-1.12	0.348	1.16				-1.83	1.42	-0.305	-0.534	1.55	3.56				-1.77	5.81	-0.285	1.59	-0.139	4.53
-2.19	-1.12	-1.27	-0.268	0.538	0.537				-1.96	0.897	-0.247	0.496	0.948	3.5				-1.65	4.34	-0.353	1.32	1.13	4.83
-2.81	-0.68	-0.0841	0.0951	0.421	1.01				-2.09	1.74	-0.752	0.933	0.899	3.34				-1.45	4.53	-0.878	1.86	0.0816	3.79
-2.9	-0.482	0.159	-0.828	0.777	0.673				-0.789	0.872	0.0904	0.816	1.67	3.65				-1.56	4.3	0.631	2.41	0.877	4.57
-2.77	0.464	-0.561	-1.33	0.292	1.42				-1.7	0.824	0.542	-0.364	0.964	3.6				-1.65	6	-1.99	1.78	0.741	3.74
-2.37	-0.421	-1.34	-0.38	0.163	1.17				-0.903	1.39	-0.361	0.0293	0.447	4				-1.52	4.26	-1.22	-0.335	0.384	4
-3.06	-1.08	-0.652	-0.407	0.657	1.39				2.15	1.33	-0.439	-0.498	1.77	3.76				-1.7	5.34	-0.86	2.49	0.331	3.56
-3.07	-1.11	-0.583	-0.813	0.321	1.45				2.21	0.78	-0.887	-1.11	1.88	4.75				-1.29	4.27	-0.562	2.14	0.0946	3.05
-3.05	0.218	0.154	-0.297	0.408	0.286				0.942	1.16	-1.01	0.0745	0.791	5.24				-1.34	4.9	0.0391	2.38	0.684	1.9
-2.74	-0.298	-0.649	-0.972	-0.503	0.612				-0.701	-0.179	-0.529	-0.224	0.532	2.59				-1.76	7.23	-1.85	2.67	0.953	2.91
-2.43	-0.453	-0.464	-0.906	-0.258	1.34				-0.17	0.291	0.782	0.161	0.46	2.86				-2.1	6.21	-0.955	1.48	1.33	0.47
-2.05	-1.6	-0.102	0.528	-0.448	0.648				0.433	0.238	0.493	-0.0732	0.00148	3.59				-1.84	5.92	-0.502	2.26	0.941	1.5
-1.98	0.174	-0.5	0.727	-0.938	0.177				-0.308	0.467	0.225	-1.06	0.728	4.37				-1.72	5.78	0.187	0.647	0.927	0.783
-1.61	-0.98	-1.65	-0.631	-0.377	1.06				-0.697	1.03	0.484	-1.34	0.991	4.13				-2.07	5.23	-1.81	1.79	0.127	1.28
-0.787	-2.12	-0.306	-0.404	0.693	0.743				0.714	0.926	0.884	-0.629	0.932	3.52				-2.18	4.98	-1.67	1.18	-0.186	1.14
-1.53	-1.25	0.114	0.616	1.11	0.521				1.38	1.15	0.712	0.466	0.31	2.37				-1.99	6.98	-1.14	0.98	0.458	0.68
-1.56	0.476	-0.751	0.0291	1.27	0.0636				0.825	0.998	1.57	0.489	0.272	2.12				-2.28	6.14	-3.13	1.12	1.92	0.396
-1.85	-0.631	-1.14	-0.489	0.747	-0.174				-0.0472	0.585	0.601	-0.0675	1.61	4.15				-2.55	5.69	-2.85	1.31	1.89	1.73
-1.8	0.274	-1.31	-0.152	0.457	1.41				-1.64	0.611	0.628	0.00264	1.91	3.34				-2.42	5.5	-1.24	1.63	0.841	0.352
-1.09	-1.09	-0.461	-0.0741	0.568	0.537				-2.09	1.9	0.44	-0.554	2.52	3.54				-2.67	5.7	-1.08	1.07	0.711	0.649
-1	-1.31	-0.661	0.0806	0.783	0.554				-2.06	1.25	-0.333	-0.767	2.83	3.64				-2.93	6.1	-0.484	0.54	0.746	0.66
-1.19	-3.19	-1.23	-0.027	0.772	-0.478				-2.02	1.42	0.0456	-0.728	2.46	3.72				-2.74	5.95	-0.745	0.514	3.01	0.907
-1.93	-1.4	-1.04	2.34	0.582	-0.569				-0.617	1.64	0.473	-0.831	2.58	4.8				-2.21	5.57	-0.913	0.831	2.11	1.55
-1.11	0.926	-0.801	2.08	0.265	0.683				-0.712	1.85	0.788	-0.753	2.08	4.88				-1.71	4.72	-1.53	1.01	3.59	1.33
-1.74	-1.19	-0.97	2.06	0.0478	-0.637				-0.365	0.402	0.679	-0.631	1.29	3.07				-1.59	3.98	-2.51	0.611	5.15	-0.085
-2.2	-1.06	-2.05	1.82	0.0262	-0.455				-1.4	1.16	1.1	-0.993	0.906	3.54				-1.31	4.9	-0.274	0.822	3.44	1.18
-1.53	-0.869	-1.72	0.584	0.176	-0.827				-0.231	1.33	0.483	-0.493	0.277	3.29				-1.35	5.5	-1.78	0.815	3.57	2.94
-1.3	-1.07	-1.92	0.967	0.35	-0.405				-1.44	0.695	1.92	-0.481	0.365	2.7				-1.41	5.13	-2.64	-0.277	3.3	2.49
-1.88	-2.77	-0.237	1.04	1.07	0.689				-1.5	-0.0341	1.74	-0.211	0.773	3.2				-0.952	4.7	-1.01	-1.76	3.48	1.45
-1.86	-1.48	-0.459	0.829	0.92	0.972				-0.882	1.68	1.93	-1.1	1.98	2.66				-0.898	5.7	-1.74	-1.26	3.28	2.22
-2.57	-0.0888	-1.57	0.726	-0.074	2.7				0.0572	1.16	1.37	-0.827	1.32	0.864				-0.952	6.49	-2.35	-1.33	1.98	3
-3.07	-1.09	-1.39	-0.0387	0.257	1.12				-0.0438	0.882	1.41	-0.599	0.684	1.91				-1.01	5.18	-1.06	-0.991	2.84	2.13
-2.83	-0.921	0.833	0.596	0.208	0.307				-1.17	0.233	0.992	-0.0754	0.769	2.6				-0.731	5.98	-0.0646	-0.548	5.9	2.85
-2.33	-1.11	0.984	0.857	-0.0247	0.0749				-1.5	0.045	1.82	0.329	0.634	2.82				-0.701	4.32	0.704	-0.479	5.18	2.44
-2.07	-2.18	1.62	0.574	0.328	1.17				-2.75	1.38	0.801	0.271	0.122	3.99				-0.606	6.69	0.455	0.12	4.44	2.83
-2.24	-3.51	0.834	0.395	0.319	-0.377				-3.16	0.608	1.16	0.142	0.783	3.65				-1.1	4.23	0.551	-1.08	5.17	2.96
-1.46	0.45	-0.157	1.39	0.176	1.3				-1.73	-0.143	0.778	-0.532	-0.0425	4.77				-0.989	4.7	0.759	-1.09	6.22	2.53
-1.75	0.404	-1.93	0.952	0.0869	1.93				-2.33	0.097	-0.103	-0.0912	0.429	4.89				-1.04	4.55	-1.68	0.733	4.21	2.23
-1.24	-1.63	-0.995	0.744	0.35	0.03				-1.97	1.33	-0.24	-0.711	1.26	4.75				-1.46	4.49	-1.88	-0.209	3.22	1.57
-1.39	-2.04	-3.29	0.0468	0.225	0.857				-0.633	0.386	-0.445	-0.297	1.64	3.25				-1.78	6.4	-1.52	0.565	2.11	0.895
-1.7	-0.253	-1.09	-0.132	-0.399	2.07				-1.12	0.821	-1.06	-0.386	2	2.39				-1.6	3.14	-1.16	-0.44	1.78	3.39
-1.58	0.634	-0.712	0.616	-0.399	2.09				-1.18	1.15	-1.11	-0.256	1.96	3.22				-1.59	3.52	-3.16	0.637	1.86	1.56
-1.87	-2.31	-1.51	0.663	-0.313	1.44				-1.46	0.993	0.253	-0.686	1.5	2.31				-1.86	3.87	-2.55	-0.264	1.29	1.17
-2	-2.82	-1.56	0.949	-0.756	2.38				-1.62	1.24	0.115	0.000178	1.76	4.14				-2.2	3.65	-0.799	-1.54	2.03	1.87
-3.25	-2.42	-0.0795	-0.299	-0.665	0.903				-1.47	0.572	-0.382	-0.507	1.74	3.05				-2.05	5.42	0.0419	-1.07	2.65	0.847
-3.81	-1.33	-0.422	0.0355	-0.363	1.45				-0.963	0.558	-0.522	-1.03	2.12	3.02				-2.11	5.37	-1.01	0.717	4.19	1.51
-4.05	-1.17	-0.728	-0.0653	-0.689	1.25				-1.64	0.484	0.188	-0.501	1.45	1.99				-2.37	2.36	-1.65	-0.594	5.02	2.92
-3.42	-0.362	-1.87	0.687	-0.366	2.75				-2.89	0.967	-0.377	-0.621	0.144	2.84				-2.57	5.79	-1.29	0.788	5.26	1.31
-3.63	0.549	-0.352	0.649	-0.295	1.29				-2.66	0.72	0.127	-0.418	-0.261	2.8				-2.54	4.99	-0.741	0.429	3.03	2.12
-3.75	-0.665	0.105	0.773	-0.576	2.28				-1.37	1.14	-0.473	-0.626	0.855	4.36				-2.62	4.6	-0.938	-0.82	2.4	2.64
-3.69	-0.491	-1.88	1.26	-1.29	0.647				-2.13	1.2	0.543	-0.567	1.44	3.48				-2.25	5.33	-1.52	-0.416	2.33	1.73
-3.86	-0.609	-0.716	0.775	-0.904	-0.637				-2.31	-0.502	0.184	-0.515	1.77	3.24				-2.59	3.84	-1.17	-1.45	1.34	1.08
-3.75	-2.11	0.126	0.82	-1.17	0.523				-1.29	0.81	0.407	-0.3	1.51	3.21				-2.53	4.94	-1.18	-0.081	2.43	1.9
-3.54	-1.64	-0.984	0.594	-0.8	0.893				-1.19	0.202	-0.00884	-0.425	0.419	3.31				-2.35	5.05	-0.747	-0.684	-0.152	0.795
-2.94	-1.9	-2.53	-0.182	-0.319	0.674				-0.631	1.14	-0.286	-0.643	-0.055	3.1				-1.94	6.77	-1.34	0.548	-0.0468	0.605
-3.24	-1.37	-0.873	0.625	-1.09	0.73				0.427	0.544	-0.383	-0.532	-0.931	3.02				-1.37	6.69	-0.226	-0.183	1.11	1.13
-3.95	-1.97	-1.67	1.49	-1.31	1.71				1.93	0.403	0.351	-0.526	-0.339	3.51				-1.43	5.43	-1.82	0.611	0.16	2.72
-3.77	-1.17	-1.42	1.15	-1.11	1.83				2.33	0.765	-0.311	-0.208	0.778	2.88				-0.808	4.54	-1.03	0.429	0.637	2.47
-3.83	-0.687	-2.33	1.13	-0.46	1.57				1.98	0.049	-0.969	-0.547	0.169	4.14				-0.342	3.65	-0.943	2.17	2.07	1.26
-4.06	-0.0772	-0.905	1.75	-0.186	0.421				0.521	0.0563	-0.755	-0.515	0.0502	4.04				-0.761	3.76	-1.52	3.67	1.88	2.85
-3.84	-0.159	-1.77	1.1	0.0438	0.74				0.112	0.582	-1.16	-0.872	0.0816	2.97				-1.16	5.66	-2.1	4.35	1.69	2.49
-3.37	-2.27	-1.72	1.93	0.0659	1.53				-0.00566	0.299	-0.514	-1.25	0.152	1.14				-1.78	4.53	-0.0848	3.43	3.15	3.59
-2.33	-1.19	-2.44	1.83	0.164	1.66				1.68	0.871	-0.452	-0.729	-0.177	2.16				-1.76	3.72	0.164	3.5	2.51	0.59
-2.02	-2.72	-1.5	1.94	-0.32	2.35				1.15	0.49	-0.147	-0.837	0.141	3.67				-1.76	4.77	0.246	2.31	1.71	2.34
-2.16	-1.61	-1.32	0.828	-0.336	2.19				0.0318	0.436	0.0662	-0.591	0.106	2.66				-1.55	4.25	0.402	2.6	1.09	2.88
-2.62	0.29	-0.256	0.425	-0.496	0.357				-0.54	0.337	-0.86	-1.4	-1.45	2.26				-1.87	4.11	-1.11	1.41	1.01	2.52
-3.18	-1.34	0.121	0.481	-0.971	2.01				-1.56	1.79	-0.227	-0.733	-1.62	2.78				-2.31	3.78	-2.03	2.01	1.12	3.43
-3.23	-0.287	-0.748	1.88	-0.92	-0.0835				-3.54	0.823	-0.154	-0.795	0.536	3.46				-2.27	2.49	-2.63	1.89	0.755	3
-3.4	-2.01	-2.27	1.3	-0.846	0.622				-4.2	0.429	-0.232	-1.35	0.612	2.71				-2.01	3.52	-1.63	1.9	1.31	5.35
-3.23	-3	-1.07	0.598	-0.933	1.26				-3.63	-0.556	-0.93	-1.16	-0.533	2.83				-1.35	2.82	-1.74	1.55	2.09	5.03
-3.62	-1.29	-2.07	0.902	-0.215	1.22				-4.19	0.753	-0.813	-1.11	-0.823	2.8				-1.3	2.89	-1.01	1.61	2.17	2.83
-4.38	-2.46	-0.168	1.43	1.38	0.485				-4.58	1.49	0.607	-0.746	-0.153	2.86				-1.57	2.56	-1.63	1.45	1.64	3
-4.46	-0.261	0.445	1.53	1.59	0.816				-4.36	0.519	-0.887	-0.733	-0.507	2.92				-1.49	3.58	-0.146	0.508	2.31	4.47
-4.58	-0.878	-0.000842	0.415	1.26	-0.135				-3.88	0.718	-0.866	-0.846	-1.29	3.33				-1.57	1.24	-1.15	0.919	1.35	2.53
-4.81	-2.19	-0.733	0.117	0.813	0.71				-3.82	1.55	-0.761	-0.853	-1.35	3				-2	4.4	-1.39	1.24	0.208	3.06
-3.62	-2.35	-1.42	0.698	0.7	2.05				-3.69	0.176	-0.563	-1.37	-1.2	2.75				-1.71	4.12	-1.25	1.33	0.9	5.1
-2.82	-3.36	-1	1.11	0.0918	2.12				-1.91	0.669	-0.112	-0.918	-0.0754	3.13				-1.48	2.71	-3.15	3.71	0.986	4.42
-2.74	-2.2	-1.38	1.57	0.09	1.77				-1.36	0.248	-0.463	-1.34	0.784	3.51				-1.96	5.03	-2.96	2.85	2.39	3.8
-2.98	-0.103	-0.633	1.11	0.455	0.28				-0.83	0.501	-0.947	-1.83	0.778	2.06				-2.39	4.08	-2.4	2.24	1.83	3.07
-2.61	2.87	0.702	1.27	0.192	1.84				-0.899	0.853	-0.419	-1.69	0.925	3.05				-2.74	5.51	-1.64	2.68	2.38	2.03
-3	0.756	1.29	0.21	-0.724	1.34				-0.158	0.11	-1.27	-1.87	1.1	2.39				-3.13	4.21	-2.53	1.68	4.78	4.01
-2.92	0.114	0.366	1	-0.69	2.52				0.271	-0.229	-0.726	-1.24	0.854	2.24				-3.18	4.05	-0.337	2.87	2.85	5.09
-3.3	-0.221	2.43	0.969	-0.642	1.51				-0.533	0.274	0.213	-1.17	1.26	3.79				-3.79	2.94	-2.86	1.84	1.29	4.26
-3.36	-0.471	1.68	0.0304	-0.631	1.45				-1.01	-0.268	-0.389	-1.32	2.17	4.37				-3.39	3.3	-2.31	2.2	0.659	3.78
-3.15	0.475	0.424	-0.0355	-0.841	2.41				-1.61	-0.197	-1.18	-0.95	2.79	2.65				-2.54	1.81	-0.925	2.99	0.211	3.93
-2.92	0.3	1.02	0.328	-0.756	2.15				-1.58	0.783	-1.03	-0.863	2.98	2.69				-0.968	3.13	-1.84	3.01	0.454	3.72
-3.34	1.09	1.16	-0.246	-0.765	1.41				-2.6	0.141	-0.981	-1.03	2.93	2.02				-1.55	4.26	-2.12	3.74	0.748	2.84
-2.53	-0.546	0.902	-0.282	0.149	2.86				-2.33	0.596	-1.52	-0.745	2.9	2.12				-2.13	2.63	0.282	2.71	0.985	3.53
-1.33	-1.39	1.08	-0.385	0.689	1.82				-3.07	0.226	-1.02	-1.15	3.4	1.74				-2.7	2.86	-0.715	2.53	0.747	4.01
-0.527	-1.07	1.04	0.662	0.471	2.33				-2.95	1.05	-0.539	-1.45	3.61	3.95				-3.35	3.18	-3.36	1.32	0.118	2.79
-1.63	-0.79	1.62	0.119	0.105	2.46				-2.43	0.824	-1.48	-1.24	3.29	3.13				-3.18	3.43	-2.47	1.94	0.899	3.29
-2.7	-0.388	0.995	0.906	0.00772	1.41				-2.41	1.04	-0.685	-1.67	4.05	1.77				-2.33	4.01	-1.87	0.695	1.06	3.49
-3.35	0.0208	1.71	2.07	-0.109	1.6				-2.66	0.182	-1.17	-1.59	4.63	2.9				-0.0733	2.8	-0.161	2.01	1.56	3.05
-2.99	-0.7	1.33	0.962	-0.869	2.55				-1.33	0.866	-0.13	-1.27	4.17	0.566				-0.705	1.9	-1.38	1.96	2.04	3.99
-3.48	-1.94	1.54	0.972	-1.47	0.69				-2.05	-0.0588	0.172	-1.34	3.87	2.18				-1.09	3.99	-0.263	1.84	2.35	2.39
-3.88	-0.724	1.07	0.895	-1.22	1.2				-2.63	0.462	0.314	-1.47	4.01	2.91				-1.37	4.72	-1.29	2.35	1.02	3.42
-4.03	-0.946	1.58	0.0995	-1.05	1.88				-2.68	0.922	-0.645	-0.887	3.95	1.7				-1.29	2.87	-2.51	3.79	0.901	4.05
-4.02	0.297	1.3	0.536	-0.859	3.28				-3.16	0.295	-0.657	-0.788	3.19	1.32				-1.37	2.89	-1.02	4.05	0.595	3.34
-4.23	-0.22	1.93	1.8	-0.778	1.65				-2.19	-0.115	-0.211	-0.864	1.6	2.17				-0.889	2.92	-1.88	2.97	0.165	3.96
-4.45	-1.67	1.65	1.08	-1.06	1.84				-2.5	0.457	-0.34	-0.858	2.09	3.55				-0.0641	3.63	-1.39	2.28	0.292	4
-4.13	-0.746	3.48	-0.107	-1.59	2.48				-2.43	0.00885	-0.582	-0.686	2.39	1.85				1.26	3.33	-1.57	2.12	0.329	3.99
-4.27	-0.0242	1.93	0.699	-1.19	0.914				-2.5	0.858	-0.137	-1.38	2.87	2.2				0.33	2.73	-2.49	2.72	-2.11	4.28
-4.11	-0.382	0.547	0.109	-0.345	1.88				-3.87	0.137	-0.489	-1.71	2.51	2.49				-0.524	4.95	-2.29	1.31	-1.28	3.66
-4.41	0.574	1.5	1.13	-0.775	2.05				-4.21	-0.0541	-1.03	-1.93	1.76	3.31				-1.37	4.01	-2.02	2.71	-0.763	3.14
-4.37	-0.767	1.2	1.69	-0.115	3.16				-3.96	-0.0694	-0.335	-2.32	1.74	2.18				-1.81	5.84	-2.67	2.32	0.0759	3.85
-3.3	-0.413	1.82	0.804	-0.0259	2.49				-1.82	0.196	-0.722	-2.43	2.06	2.87				-2.29	5.67	-0.954	3.19	-0.633	4.17
-2.69	-0.916	1.29	0.636	-0.135	2.46				-2.54	-0.6	-1.47	-2.37	1.27	2.86				-2.37	2.58	-0.54	2.51	-0.0505	4.86
-1.83	-1.05	1.45	1.42	0.288	2.13				-1.64	-0.334	-0.7	-2.15	1.16	4.39				-2.59	3.15	-0.689	1.12	1.58	2.51
-1.93	-1.78	0.628	0.749	-0.492	1.94				-2.1	0.528	-0.348	-1.48	1.32	2.85				-2.67	4.99	-0.0397	3.34	0.595	4.15
-1.86	-0.78	0.769	1.43	0.274	3.46				-2.67	1.17	-0.907	-1.78	1.17	1.31				-2.52	3.73	-1.21	4.6	0.565	4.39
-2.27	-1.61	2.53	1.61	0.691	1.83				-2.87	0.588	-1.44	-0.711	1.75	2.74				-2.64	4.71	-1.08	4.54	2.72	4.81
-2.49	-0.271	1.95	1.31	0.763	2.3				-4.05	0.202	-1.82	-0.595	3.08	2.59				-2.66	3.45	0.749	4.75	3.64	4.75
-1.97	-0.94	1.1	1.39	0.18	3.28				-3.79	0.104	-1.19	-1.8	3.19	3.29				-2.45	3.65	-0.836	4.45	3.58	3.57
-2.47	0.336	1.25	0.85	0.172	3.02				-3.6	0.272	-1.56	-1.07	2.27	2.45				-2.23	1.92	-1.37	4.17	1.87	3.45
-2.89	-0.457	0.881	0.399	-0.00662	1.81				-2.58	0.6	-1.32	-0.867	1.76	2.68				-1.94	4.77	0.813	3.81	1.15	5.19
-3.2	-1.01	1.66	0.427	0.268	1.41				-2.47	0.688	-1.35	-0.0177	1.99	3.39				-2.31	5.9	1.46	3.56	1.2	3.78
-3.36	-2.39	0.506	0.627	-0.116	1.94				-1.74	0.281	-0.834	-0.336	1.82	1.62				-2.66	4.3	-0.822	2.2	0.588	4.18
-3.31	-2.23	-0.0999	0.97	0.433	2.66				-1.73	0.0226	-1.9	-1.09	1.84	1.64				-2.24	2.91	0.709	0.836	0.802	4.46
-2.98	-0.277	0.537	1.37	0.325	2.02				-1.06	-0.415	-2.02	-1.29	2.37	1.34				-1.61	3.55	1.03	1.23	0.442	4.45
-4.32	-1.83	1.4	1.5	0.549	2.79				-2.11	0.445	-1.67	-0.72	1.67	2.34				-0.905	2.64	1.73	0.956	1.32	3.06
-4.35	-0.58	1.63	1.68	0.238	2.38				-0.833	0.206	-1.41	-0.689	1.88	2.64				-1.03	2.97	0.319	0.164	1.12	3.46
-2.95	-2.38	0.73	1.3	0.454	1.83				0.163	-0.298	-0.659	-1.1	0.899	1.79				-0.99	2.75	0.212	2.45	0.881	4.16
-3.51	-1.99	0.71	1.55	0.263	2.64				-0.407	-0.0459	-1.42	-0.956	0.837	1.22				-0.654	2.58	1.73	2.28	1.19	4.07
-3.95	-0.444	1.28	0.772	0.00156	1.5				0.236	0.695	-1.12	-1.12	0.387	2.44				-0.998	3.64	2.44	1.87	0.235	4.77
-3.79	-0.917	1.62	0.819	0.0117	2.75				0.746	0.538	-0.748	-1.52	0.395	1.5				-1.56	1.17	1.17	0.325	0.717	4.34
-5.02	-1.29	1.63	0.0974	-0.0759	2.43				0.159	0.645	-1.04	-1.28	0.394	2.68				-1.68	3.35	-0.297	1.52	0.725	4.71
-5.17	-0.969	2.06	-0.84	-0.206	2.57				0.745	0.673	-0.712	-1.09	1.04	1.61				-1.45	3.69	1.27	3.17	0.562	5.06
-5.26	0.599	1.54	0.631	-0.908	1.45				0.878	1.21	-1.06	-0.751	1.24	1.75				-1.58	5.01	2.01	4.4	1.26	5.86
-5.53	-0.0168	1.67	-0.352	-1.04	2.15				-0.581	0.167	-0.203	-1.11	1.73	3.73				-1.34	2.23	-0.41	3.3	0.21	4.2
-5.14	-2.37	1.38	0.345	-1.78	1.79				0.521	0.0933	-0.809	-0.836	1.87	1.25				-1.74	3.92	-0.574	3.37	-0.0441	3.13
-4.38	-0.996	0.172	-0.61	-1.41	0.384				-0.153	0.363	-0.343	0.00847	3.01	3.1				-2.27	5.07	0.164	2.12	0.282	5.16
-4.61	-0.486	1.93	-0.23	-1.77	1.87				0.315	0.81	-0.175	-0.728	4.01	2.93				-2.66	4.54	2.01	1.68	0.478	3.96
-4.42	-0.688	1.42	1.24	-1.96	1.51				-2.3	1.75	-0.567	-0.325	4.47	2.42				-2.91	2.94	1.23	0.234	-0.553	3.5
-4.86	0.249	1.62	0.691	-2.13	1.78				-2.65	0.502	-1.05	-0.705	3.62	2.2				-2.87	1.64	0.974	1.7	-0.459	3.89
-5.15	-0.796	1.11	-0.518	-1.22	1.93				-2.57	0.558	-0.175	-1.28	3.67	3.77				-1.78	1.92	1.6	1.1	-0.149	4.41
-3.89	-3.17	1.03	0.936	-0.739	2.52				-1.63	1.18	-0.695	-0.979	3.1	0.917				-1.53	4.88	1.21	1.61	2.05	4.4
-2.58	-3.59	1.16	1.09	-0.986	2.07				-0.545	1.65	0.115	-0.957	2.02	0.797				-1.62	4.23	0.279	-0.769	2.65	6.57
-2.2	-2.96	2.24	-0.0694	-0.682	2.01				-1.74	0.507	0.241	-1.2	1.08	0.328				-1.85	2.29	0.517	0.291	1.34	5.71
-2.34	-0.863	1.02	0.182	-0.975	0.558				-0.153	0.799	-0.569	-0.769	1.43	1.6				-2.02	1.95	0.051	2.53	2.44	4.36
-1.76	-1.05	0.404	-0.961	0.203	1.58				-2.16	0.381	-1.2	-0.584	1.8	1.72				-1.89	2.53	0.996	1.06	1.6	4.14
-1.84	-1.03	1.27	-0.893	-0.279	1.33				-2.09	1.46	-0.492	-1.35	1.53	2.08				-1.57	2.38	-0.402	0.543	1.39	5.42
-1.73	-0.935	0.561	-0.665	-0.322	0.16				-3.1	0.0304	-0.44	-0.592	2.44	3.55				-1.69	1.41	-0.139	0.722	1.16	6.14
-1.23	-2.87	-0.303	-0.327	-0.394	0.28				-0.726	0.247	-0.198	-1.8	1.19	2.52				-2.11	2.42	-1.14	-0.22	0.815	4.39
-0.164	-2.69	-0.801	-0.26	-0.452	2.24				-1.72	0.406	-0.272	-1.75	0.34	2.05				-2.79	2.33	0.598	0.131	0.0124	4.38
-0.0233	-1.67	-1.1	-0.947	-0.16	2.88				-1.3	0.618	-0.705	-1.28	-0.798	3.41				-2.44	2.84	0.0177	0.00144	0.307	5.75
0.185	-2.3	-0.255	0.278	-0.782	0.852				-0.162	0.407	-0.983	-1.62	-0.281	2.28				-1.87	3.31	-0.566	-1.06	0.551	4.13
0.158	-2.22	-0.835	-1.04	0.0384	2.43				-0.815	0.878	-0.562	-0.927	0.499	3.02				-1.12	3.26	0.212	0.474	2.59	4.49
0.312	-0.847	0.0286	-0.567	-0.647	-0.284				-0.00278	0.35	-0.941	-1.34	0.786	3.03				-0.939	2.34	0.331	0.651	3.84	2.7
-0.102	-2.1	-0.855	0.132	-1	1.58				0.595	0.725	-0.648	-0.866	2.52	1.73				-1.28	2.03	-0.465	2.54	2.57	4.98
0.222	-3.61	0.537	0.411	-1.48	1.41				1.74	0.813	-0.66	-0.0874	2.13	1.36				-1.89	1.2	-2.09	2.01	2.71	4.12
0.466	-2.27	-1.1	0.208	-1.13	1.23				1.38	0.16	-0.485	-0.169	1.11	2.78				-2.17	3.02	-0.897	1.83	1.4	5.38
-0.382	-1.8	-0.147	0.32	-1.49	0.605				0.516	-0.00409	-0.902	-0.518	0.788	2.77				-2.72	1.35	-1.56	0.538	0.91	2.63
-0.423	-1.18	-0.0838	0.374	-0.515	1.92				0.261	0.0178	-0.566	-0.534	0.48	2.89				-2.7	3.02	-0.993	0.796	1.8	3.26
-0.458	-1.05	-0.102	1.32	-0.461	1.34				0.588	0.281	-1.76	0.114	1.11	2.45				-2.89	0.424	0.257	0.742	0.439	5.57
-1.1	-2.18	-0.179	0.288	-0.619	2.07				-0.184	0.0981	-1.03	-0.8	0.876	2.59				-2.68	2.6	0.663	1.46	1.47	4.4
-0.988	-0.222	0.324	0.743	-1.07	2.26				2.54	0.666	-1.02	0.774	1.26	3.39				-2.61	2.62	0.511	1.14	0.212	5.26
-1.05	-2.27	0.101	0.12	-1.12	1.42				0.956	0.357	-1	0.838	0.688	3.33				-2.02	4.08	1.45	-0.295	0.332	5
0.362	-2.61	1.11	-0.615	-0.983	1.77				0.732	-0.107	-0.87	-0.426	1.34	3.29				-2.25	2.26	-0.292	-1.43	0.209	5.43
0.329	-2.01	2.87	-0.437	-0.904	1.82				0.422	0.394	-1.3	0.555	1.7	3.08				-2.33	0.0381	0.251	-0.736	1.98	4.11
-0.0154	-1.61	1.68	-1.56	-0.813	2.48				-0.385	0.157	-0.821	0.0113	1.29	2.63				-2.76	0.567	-0.283	-0.214	2.15	4.58
-1.07	-1.82	0.594	-0.278	-0.793	2.55				-0.621	-0.0608	-0.874	-0.0557	0.635	2.06				-2.17	-0.106	-0.0659	-1.64	1.88	4.45
-1.71	-3.5	0.478	0.858	-0.735	1.97				-0.594	0.502	-1.2	-0.557	0.543	2.86				-2.29	1.56	-1.5	-2.47	0.891	4.45
-1.43	-1.19	-0.00871	0.37	-0.758	3.34				-0.385	0.268	-1.25	-0.306	1.75	2.63				-2.66	1.65	0.0392	-1.43	1.51	5.1
-1.5	-0.936	0.825	0.68	-0.64	2				-0.48	0.662	-0.793	-0.354	0.753	1.99				-2.83	1.79	-0.133	-2.17	0.829	5.69
-1.28	-1.45	1.65	-0.0738	-0.709	0.343				-1.21	0.792	-0.632	-0.731	-0.661	0.745				-3.02	3.91	-0.459	0.463	-0.0292	4.93
-1.76	-3	1.05	-0.212	-0.513	2.52				-1.27	-0.188	-1.61	-1.37	0.361	1.82				-2.94	2.02	0.45	2.11	-0.223	5.27
-2.29	-2.96	2.61	0.0778	-0.967	1.27				-3.96	-0.135	-0.64	-0.698	3.26	3.22				-3.01	2.99	-1.12	-0.0737	-0.269	5.85
-2.19	-1.88	1.68	0.0771	-0.852	1.17				-4.52	1.56	-0.848	-1.81	3.01	1.55				-3.35	2.12	-2.06	2.34	0.288	5.99
-1.59	-2.69	0.609	0.521	-0.359	2.05				-4.44	1.56	-1.33	-0.806	1.14	4.22				-3.59	3.07	-0.424	2.29	1.09	6.21
-1.26	-1.31	1.46	-0.28	-0.624	1.11				-3.71	0.644	-1.54	-1.02	0.156	2.59				-3.59	3.07	-0.962	2.83	0.889	5.28
-1.87	-1.62	1.07	-0.17	-0.648	1.89				-3.21	0.207	-1.22	-0.751	-1.25	2.62				-3.04	1.92	-0.874	2.46	1.86	4.11
-1.66	-1.12	1.14	0.417	-0.676	1.48				-3.86	0.528	-0.409	-0.452	-1.36	2.06				-1.58	0.929	0.418	2.76	1.42	4.88
-2.09	-2.4	2.43	1.26	-0.447	1.13				-3.12	0.495	-0.787	-0.639	-1.13	1.26				-0.194	3.21	2.94	1.54	1.52	3.36
-2.25	-1.01	0.689	2.23	0.311	1.9				-3.76	0.607	-0.743	-0.644	-0.431	2.63				-0.0574	1.05	0.328	-0.434	1	5.77
-2.55	0.291	-0.352	1.87	-0.323	1.67				-4.58	-0.0335	0.00297	-0.138	0.218	2.92				-0.598	1.86	-0.254	1.37	0.939	4.21
-2.02	-0.416	-1.4	1.13	-0.413	1.47				-3.62	-0.119	0.444	0.259	-0.629	2.48				-0.975	1.82	-1.84	0.0945	2.03	5.08
-1.84	-0.297	0.166	2.04	-0.827	0.92				-2.62	0.749	0.171	0.71	-1.13	1.93				-0.954	3.9	1.04	2.62	1.61	3.57
-1.57	-1.65	0.233	1.68	-0.123	2.26				-1.34	-0.105	0.556	1.37	-1.21	1.87				-0.517	2.13	2.2	1.18	2.31	4
-1.05	-1.8	2.41	1.47	0.294	2.42				-2.62	0.167	-0.297	0.48	-0.824	1.52				-0.724	2.81	2.05	0.871	1.9	4.86
-0.701	-1.86	2.41	1.26	1.3	1.7				-1.67	-0.0616	-0.543	1.02	-1.27	1.51				-0.258	2.28	0.593	-0.455	1.46	5.72
-1.27	-0.803	2.25	0.753	1.59	1.2				-2.75	-0.363	-0.972	-0.459	-0.868	0.736				-0.0388	2.03	-0.324	0.179	1.61	4.28
-0.929	-0.683	-0.28	1.3	1.25	1.9				-4.54	0.181	-0.928	-0.833	-1.85	1.43				-0.825	2.95	1.21	0.258	1.17	5.81
-1.97	0.326	-1.44	1.53	1.11	-0.191				-4.92	-0.409	-0.489	-0.684	-1	2.5				-0.558	1.76	0.152	0.0595	1.41	5.15
-2	-2.66	-1.22	2.06	0.628	1.74				-4.82	0.0962	-0.74	0.0346	-0.792	0.457				-1.09	2.08	-1.88	-0.259	1.25	3.94
-2.32	-3.36	-0.253	2.27	1.3	0.673				-4.03	0.682	-0.155	0.493	-1.19	2.24				-1.13	3.55	-1.19	-0.823	1.48	6.13
-2.35	-1.5	0.0293	1.32	0.91	1.31				-3.86	0.587	-0.793	0.49	-0.756	2.07				-1.39	4.69	-0.714	-0.454	1.08	4.24
-1.79	-1.37	-0.677	1.11	0.481	1.16				-4.64	0.29	-0.543	0.641	-0.373	0.919				-1.36	2.63	-0.0138	1.6	1.64	5.96
-2.05	-0.928	-0.448	1.28	0.0462	0.572				-3.68	0.232	-1.11	0.417	-1.04	2.75				-1.08	3.83	1.37	1.49	2.17	5.77
-1.47	-1.08	0.164	1.14	0.473	0.611				-3.76	0.323	-0.742	-0.554	-0.682	1.98				-1.35	3.4	-1.04	1.5	1.11	5.47
-1.69	-2.21	-0.392	0.266	0.357	1.05				-3.59	0.431	-0.473	-0.434	-0.383	1.25				-1.69	4.16	1.46	0.774	1.38	5.29
-1.61	-2.62	0.362	0.461	0.301	0.498				-3.33	0.229	-0.875	-0.168	-0.972	1.02				-1.77	2.27	0.889	0.388	0.884	4.65
-2.05	-2.94	-0.858	1.14	0.607	0.544				-3.56	-0.194	-2.01	0.52	-1.62	1.71				-1.83	2.48	-0.878	0.865	0.754	5.69
-2.07	-0.795	1.39	0.193	0.36	-0.305				-2.47	-0.0266	-0.947	-0.481	-2.15	2.48				-2.39	2.7	-1.49	-0.324	-0.19	5.95
-2.44	-1.2	2.1	-0.717	0.417	0.582				-2.93	-0.701	-1.09	-0.214	-1.78	1.75				-2.4	1.36	-1.5	1.05	-0.569	4.17
-2.23	-1.44	1.42	-0.335	1.12	-0.0362				-3.05	0.00601	-0.994	-0.485	-1.78	2.97				-2.13	1.46	-0.0846	1.2	-0.794	5.42
-2.3	-2.42	0.939	-0.313	1.56	0.227				-3.04	-0.139	-0.34	-0.336	-1.44	3.81				-1.22	3.01	-0.662	1.3	-1.47	5.21
-1.26	-1.9	1.14	-0.181	1.71	0.606				-2.03	-0.29	-0.52	-0.613	-2.22	2.92				-0.88	2.92	-2.21	1.8	-0.939	4.63
-1.7	-1.85	0.401	-0.0485	1.2	-0.361				-2.35	0.0928	-0.86	-0.377	-2.09	1.12				-1.09	3.66	-0.0972	2.25	-0.514	3.77
-2.04	-2.7	1.88	-0.0913	1.12	0.118				-1.62	1.13	-1.03	-1.49	-1.98	2.1				-0.739	2.7	-1.6	1.64	-0.353	3.85
-1.39	-3.63	2.47	0.539	0.783	0.217				-0.208	-0.221	-1.52	-0.655	-1.89	3.52				-0.545	2.2	-0.11	1.42	1.59	6.06
-1.31	-1.86	0.263	-0.768	0.527	1.51				-1.79	-0.299	-1.74	-0.603	-2.53	2.25				-0.739	3.43	-0.0641	-0.158	1.23	4.84
-1.21	-1.34	1.44	-0.469	-0.0465	0.687				-0.92	-0.867	-1.98	-0.0793	-1.77	2.19				-1.09	1.99	-1.73	0.223	1.57	5.8
-2.23	-1.19	2.69	-0.102	0.748	0.19				-0.577	0.0219	-0.687	-0.534	-1.81	1.67				-1.41	1.81	0.33	-0.34	0.446	4.04
-2.32	-0.42	1.73	0.725	0.782	0.849				-0.72	-0.415	-0.645	-1.04	-1.77	2.06				-0.655	1.79	-1.76	0.472	0.628	3.63
-1.14	-1.01	0.278	0.637	0.907	0.523				-1.57	0.274	-0.965	-0.603	-1.08	0.756				0.756	2.24	-1.3	0.944	-0.175	5.02
0.797	-2.64	0.612	1.83	0.161	1.34				-2.82	0.456	-0.993	-0.417	-0.718	1.04				0.751	1.14	-2.04	-0.331	-0.0665	4.32
0.414	-2.87	0.807	0.878	0.569	1.17				-1.08	1.07	-1.31	-0.225	-0.653	1.26				0.0764	3.44	-1.52	-0.406	0.605	5.5
0.474	-0.6	-0.724	-0.198	0.057	1.23				-0.549	-0.224	-0.844	-0.574	-1.13	2.53				-0.118	3.56	-1.37	0.224	0.309	5.85
-0.137	-0.371	0.0439	-0.38	0.792	0.311				-0.732	0.44	-1.51	0.149	-0.534	2.19				-0.624	2.57	-1.38	0.218	0.628	5.51
-0.513	0.113	0.405	-1.37	0.103	0.0477				-0.477	0.497	-0.764	-0.203	0.676	2.91				-1.3	2.76	-1.4	2.15	1.19	3.07
-0.897	1.32	0.409	-0.753	0.5	1.44				-0.636	-0.0729	-0.64	-0.416	-0.087	0.577				-1.64	3.27	-3.49	2.32	2.57	5.21
-0.932	0.1	-0.382	-1.03	1.01	2.21				-1.43	0.131	-1.25	0.463	-0.74	2.32				-1.49	2.69	-2.07	1.88	5.62	2.05
-1.58	-0.582	0.936	-0.472	0.311	0.299				-1.1	0.0123	-0.699	-0.757	-1.57	1.9				-1.9	3.47	-3.55	1.61	4.24	4.07
-2.48	-0.673	0.455	-0.924	0.25	0.543				-1.04	-0.0516	-1.16	-0.191	-1.83	1.82				-2.31	2.53	-1.03	2.49	3.01	4.09
-2.74	-0.0755	1.51	-0.735	0.558	0.575				-0.576	0.305	-0.494	0.00996	-1.22	1.16				-2.12	2.55	-1	2.86	3	3.06
-3.1	-1.07	0.208	-0.533	0.623	2.18				-2.15	0.602	-1.39	-0.412	-1.65	1.59				-1.48	2.84	-1.08	2.75	2.27	3.84
-2.43	0.00623	-1.49	-0.882	0.35	0.872				-1.59	-0.286	-0.702	-0.887	-1.94	2.06				-0.386	2	-1.33	1.98	0.595	3.91
-2.06	-0.504	0.685	-0.452	0.696	-0.393				-1.37	-0.383	-1.21	-0.563	-2.26	2.03				0.236	2.24	-0.996	1.54	0.887	2.03
-1.45	0.263	1.72	-0.676	0.71	0.352				-1.58	-0.625	-1.42	-0.369	-1.89	0.39				-0.0699	2.78	-1.24	2.14	1.67	3.13
-1.82	0.025	1.27	0.789	-0.0496	0.904				-1.12	0.165	-0.691	-0.466	-2.11	2.33				-0.756	2.47	0.216	2.73	0.139	3.25
-2.59	2.21	0.463	-0.591	-0.284	0.223				-2.01	0.558	-0.428	-0.237	-2.05	1.04				-1.08	1.41	-1.27	1.97	2.47	3.15
-1.86	-0.34	-0.431	-0.281	-0.58	-0.699				-2.97	-0.0238	-0.344	-0.594	-1.41	0.0863				-0.565	1.39	-1.08	2.33	3.7	2.97
-1.71	-0.942	-1.34	-0.691	-0.797	1.06				-3.21	0.371	-0.385	-0.83	0.131	0.589				-0.746	2.66	-1.46	1.03	3.38	3.73
-0.921	0.205	0.267	0.334	-0.687	-0.279				-3.58	-0.533	-0.691	-0.264	-0.167	2.5				-0.773	2.21	-2.17	-0.766	2.72	2
-0.876	-0.505	-0.334	0.0864	-1.02	-1.08				-2.79	-0.157	-1.33	-0.105	-0.887	2.1				-0.908	1.71	-0.892	0.456	1.07	2.86
0.639	-2.79	-0.445	0.31	-0.116	0.107				-2.46	0.161	-0.342	0.0307	-1.08	2.49				-1.19	3.11	-1.7	-0.271	2.52	1.58
0.628	-2.24	-0.32	0.252	0.0126	-0.479				-1.86	-0.172	-0.103	-0.408	-0.966	1.53				-1.62	2.18	-0.0972	-0.773	3.38	1.69
-0.525	0.477	-0.795	0.0116	-0.254	0.323				-0.525	0.258	-0.00944	-0.593	0.574	1.93				-1.71	0.264	-0.0994	-1.22	2.36	2.28
-1.47	0.0258	-1.41	0.019	-0.232	0.68				-1.02	-0.379	-0.207	-1.06	1.98	0.795				-1.91	3.56	0.113	-1.65	0.662	2.19
-1.7	-0.437	-0.49	-0.78	0.222	0.0674				-0.567	0.16	-0.447	-0.817	0.919	1.3				-1.49	2.87	-0.265	-0.0938	1.18	3.86
-1.67	-1.33	-0.52	-0.316	-0.232	0.778				-0.852	-0.139	-0.983	-0.0705	0.197	0.892				-0.9	2.86	-0.892	-1.08	1.47	4.28
-1.55	-0.847	0.0258	0.222	0.405	0.99				-0.286	-0.536	-0.148	-0.426	-0.786	2.66				-1.09	3.92	-0.864	-2.55	1.11	2.91
-1.44	-2.28	-0.217	-0.549	0.533	1.09				-0.379	-0.11	-0.209	-0.439	-0.0828	2.46				-1.14	2.22	-0.77	-1.92	0.347	3.36
-1.87	-0.235	-0.124	-0.269	0.22	1.18				-0.681	-0.107	-0.386	-0.262	-0.248	1.42				-1.11	1.06	-0.634	-2.69	-0.705	2.32
-0.961	-0.622	0.856	-1.04	0.209	-0.0438				-1.54	0.628	0.018	-0.679	-0.942	0.413				-1.56	0.673	0.564	-1.52	0.546	2.53
-1.35	-0.45	-0.342	-1.25	-0.204	-0.383				-2.14	0.223	-0.332	-0.374	-1.01	1.23				-1.95	3.8	0.829	-1.54	-0.12	4.59
-1.31	-1.66	-0.0854	-1.51	0.271	0.334				-2	-0.207	0.942	-0.163	0.3	0.739				-1.83	3.35	0.279	-0.303	0.46	2.63
-1.41	-1.95	0.536	0.368	0.515	-0.0632				-1.99	-0.817	0.258	0.375	-0.111	1.43				-1.78	3.03	-4.2	-0.206	1.56	2.39
-1.67	-0.803	0.18	-0.603	0.259	-0.724				-0.921	-0.594	0.475	-0.171	-0.607	0.228				-1.5	1.75	-5.07	1.44	1.68	3.31
-1.91	0.477	-0.619	-0.683	0.642	-0.713				-2.33	-0.933	0.817	-0.0734	-1.02	2.87				-1.16	2.32	-3.35	0.776	1.67	2.5
-0.982	-3.23	-0.209	0.731	-0.0809	0.771				-3.23	-0.874	-0.28	0.0183	-1.15	1.74				-1.09	0.89	-3.17	1.11	1.42	2.71
-1.44	-0.619	0.648	0.453	-0.167	0.72				-3.34	-1.46	-0.158	-0.736	0.26	1.93				-1.19	1.78	-3.06	0.71	1.21	4.32
-1.4	-1.57	1.55	-0.208	-0.108	0.341				-4.17	-0.558	-0.216	-0.507	1.59	0.33				-1.32	0.997	-1.68	-0.262	1.09	2.41
-1.02	-0.643	0.916	-0.44	0.0994	0.979				-2.8	0.247	-0.235	-0.527	0.535	1.02				-1.61	3.31	-1.99	-0.0804	1.31	3.11
-0.604	-1.4	0.681	0.792	0.109	0.487				-1.47	-0.0325	-0.331	-0.101	2.27	1.67				-1.75	2.35	-2.81	-1.58	1.31	5.62
-0.77	-0.0782	-0.00458	0.573	0.395	-0.236				-1.99	-0.154	-0.982	0.124	4.05	1.65				-2.26	2.26	-3.23	-0.613	1.16	4.45
-0.688	-0.493	0.797	0.221	0.213	-0.647				-2.32	0.0373	-0.344	-0.926	5.1	2.17				-2.26	3.04	-2.06	0.101	0.59	3.4
-0.35	-1.36	0.623	-0.383	-0.063	0.0923				-2.12	0.105	-0.0627	-0.737	3.17	0.853				-2.2	1.85	-1.97	0.893	1.02	5.21
-0.223	-1.48	-0.00162	0.0858	0.0187	0.0142				-0.293	-0.644	0.204	-0.696	2.3	1.7				-1.94	0.937	-2.66	-0.517	0.617	5.13
-0.0862	-2.45	0.202	-1.28	0.336	0.148				-1.11	-0.623	-0.345	0.173	1.63	3.46				-1.35	1.18	-2.32	-0.803	0.498	6.1
0.304	-2.62	-0.0633	-1.49	0.0768	0.553				-1.8	-0.325	-0.595	0.287	0.536	0.815				-1.6	2.44	-3.62	0.543	0.618	3.92
0.129	-0.684	-1.04	-1.99	-0.124	0.738				-1.67	-0.66	-0.867	-0.277	-0.372	1.34				-1.18	2.94	-3.62	0.0443	0.803	3.9
-0.179	-0.612	-1.42	-2.44	-0.587	0.151				-0.526	-0.155	-1.08	-0.404	0.261	0.837				-0.984	2.44	-2.09	-0.187	0.76	4.68
-1.32	0.0174	-1.6	-1.04	-0.14	1.53				-2.08	-0.377	-1.06	-1.69	0.82	1.91				-1.02	2.58	-2.93	-0.451	0.448	5.14
-1.04	0.739	-0.975	-2.24	0.0707	-0.195				-2.39	-0.747	-0.85	-0.532	0.56	1.76				-1.56	3.21	-2.43	-1.64	0.881	5.32
-0.916	-0.952	-1.67	-0.426	0.277	-0.0168				-2.23	0.0361	-0.442	-1.57	-0.452	2.95				-2.23	3.22	-3.06	-1.11	1.3	4.79
-0.72	0.971	-0.824	-1.18	0.839	0.575				-2.14	-0.189	-1.35	-0.254	-1.02	1.3				-3.04	2	-2.7	-0.323	2.04	4.26
-1.74	-0.115	-0.483	-0.856	1.03	0.292				-1.7	-0.671	-0.726	-0.263	-0.958	1.92				-3.41	2.1	-3.09	-0.977	1.1	5.59
-1.83	-1.94	-0.685	-2.14	-0.0752	-0.169				-1.97	-0.0175	-0.69	-0.383	-0.979	0.437				-3.2	1.75	-3.44	-2	2.26	5.32
-1.24	-1.01	-0.934	-1.61	0.237	-0.0158				-2.82	-0.294	-0.963	-0.754	-1.26	1.87				-2.97	2.33	-1.55	-2.35	1.1	3.81
-1.4	1.1	-1.66	-1.41	-0.0596	0.328				-2.83	-0.106	-1.3	-0.836	-1.59	1.9				-3	3.65	-2.35	-1.52	1	4.71
-0.999	-2.2	-1.62	-0.574	0.16	0.562				-1.65	-0.0557	-1.27	-1.11	-1.05	0.895				-3.33	3.43	-2.16	-2.11	0.319	3.71
-1.59	0.026	-1.42	-0.899	0.209	0.442				-2.69	-0.122	-1.98	-1.36	-0.876	4.18				-3.21	0.674	-2.96	-1.47	-0.11	5
-1.39	-2.52	-2.29	-0.375	0.165	-0.742				-2.75	0.0304	-1.36	-1.9	-1.78	1.28				-2.8	1.71	-4.6	-2	1.18	4.72
-1.49	-1.05	-1.35	-1.44	-0.192	0.107				-3.22	0.0163	-0.601	-1.89	-2.17	2.42				-2.48	2.82	-4.82	-2.09	1.29	4.11
-1.39	-2.64	-1.28	-0.663	0.129	-0.0696				-1.93	-0.217	-1.06	-1.75	-1.53	0.938				-2.23	0.54	-5.32	-1.55	1.57	4.16
-2.14	0.171	-2.01	-1.29	-0.384	-0.401				-1.24	-0.308	-0.538	-1	0.0464	2				-1.98	1.48	-3.03	-0.634	1.57	4.69
-1.89	-0.429	-2.71	0.0665	-0.618	-0.244				-0.992	0.0779	-0.822	-1.35	0.199	1.63				-1	2.12	-2.66	-0.961	1.12	4.04
-1.99	-2.36	-1.36	0.801	-0.874	-0.117				-0.455	-0.852	0.0393	-1.73	-0.199	3.43				-0.0946	1.65	-3.06	-1.64	0.644	3.33
-1.92	-1.12	-1.76	0.521	-0.812	-0.345				-0.511	-0.321	0.273	-2.07	1.1	3.53				-0.778	2.62	-4.99	-1.09	1.02	3.8
-1.15	-0.194	-4.02	-0.373	-0.97	0.481				-0.634	0.287	0.489	-1.8	1.4	2.24				-0.52	2.59	-3.51	-1.49	0.818	5.99
-1.65	-0.809	-3.49	-0.413	-0.939	-1.69				-1.62	-0.476	-0.206	-2.42	2.9	1.01				-1.13	0.754	-3.62	-1.53	0.0867	5.17
-1.9	-2.24	-1.14	0.268	-0.708	0.119				-1.63	-0.00494	0.478	-2.43	3.02	1.3				-1.63	2.17	-1.57	-2.03	-0.61	4.75
-1.78	-1.06	-0.216	-0.165	-0.69	-1.31				-1.39	-0.776	-0.0172	-2.29	2.56	0.599				-1.69	2.62	-0.534	-2.43	-0.1	5.72
-2.52	-1.9	-1.1	-0.0455	-1.47	-0.685				-1.83	-0.124	0.0977	-2.09	0.999	1.6				-2.32	1.18	-0.134	-1.22	-0.699	6.43
-2.84	-0.974	-0.711	0.146	-0.229	-1.12				-1.45	-0.774	0.0919	-1.2	0.223	-0.0648				-2.69	2.68	2.11	-0.302	0.0385	3.97
-2.45	-1.07	-1.52	-1.09	0.128	0.0244				-1.17	-0.755	0.915	-2.41	0.0741	1.91				-2.92	2.67	1.2	-0.194	0.302	4.64
-2.3	0.696	-1.32	-0.713	-0.196	-0.839				0.254	0.0685	-0.155	-1.42	0.108	0.796				-2.9	3.02	-0.475	-0.55	-0.812	5.07
-3.27	0.295	-3.37	0.227	-0.611	-0.489				-0.172	0.202	0.641	-1.73	-1.41	3.24				-1.99	3.5	-0.353	-0.344	-0.885	4.95
-3.64	0.214	-1.76	-0.275	-0.704	0.0871				-0.698	-0.193	0.278	-1.36	-2.29	2.35				-1.55	1.71	-0.453	-0.214	0.0359	4.43
-2.96	-1.8	0.194	-0.306	-1.07	0.108				-0.586	-1.02	0.692	-0.977	-1.9	1.78				-1.79	1.01	2.57	-1.11	0.17	4.03
-2.18	-0.595	0.215	-1.01	-0.434	0.736				-0.551	-1.31	0.174	-1.19	-0.0209	2.58				-2.04	1.67	2.64	-0.305	-0.74	2.92
-2.17	-0.384	0.127	-0.12	-0.188	-0.109				-1.7	-0.494	-0.409	-1.51	0.763	1.69				-2.45	1.49	1.71	0.959	-0.148	3.49
-1.83	-1.91	-0.462	-0.525	0.0987	-0.673				-1.99	-0.944	-0.587	-2.27	-0.856	0.769				-2.5	2.75	2.6	0.301	1.12	3.75
-1.65	-0.862	-0.439	-0.484	0.505	-0.155				-1.29	-0.603	1.17	-1.66	-1.14	2.26				-2.57	1.11	2.64	-1.7	2.14	3.74
-1.88	0.461	-0.978	-0.842	0.555	-1.26				-0.775	-1.49	0.581	-1.22	-1.55	2.88				-2.46	1.62	2.35	-1.2	1.37	4
-2.08	-0.693	-0.632	-1.17	0.337	-0.435				-0.175	0.585	0.523	-0.611	-1.43	3.16				-2.58	2.69	1.29	-1.29	2.36	2.94
-2.01	-1.35	-0.258	-1.48	-0.254	-1.32				-0.485	-0.425	0.0492	-0.716	-2.12	2.83				-2.3	2.33	0.619	-0.251	1.25	1.96
-0.954	-0.638	-0.133	-1.59	-0.575	-0.91				-1.53	0.722	0.223	-0.728	-1.26	1.84				-2.23	1.12	2.5	-0.422	2.34	4.33
-0.794	-2.26	-0.536	-0.306	-0.708	-1.38				-2.73	0.12	-0.59	-0.637	-0.814	1.21				-1.97	2.87	2.57	-1.11	1.06	3.37
-0.769	-2.01	-0.683	-0.094	-0.757	-0.415				-2.43	0.429	-1.39	0.0802	-0.615	1.25				-1.16	-0.0359	1.6	-0.541	0.621	3.7
-1.3	-1.63	-0.57	-0.338	-0.577	0.493				-2.45	0.0783	-1.72	-1.5	-1.08	1.88				-0.903	1.18	2.4	-0.484	0.0492	3.85
-2.62	-1.7	-1.83	-1.22	-0.789	0.0641				-1.94	-0.257	-0.989	-0.488	-1.31	1.77				-1.13	1.22	0.196	-0.502	1.16	3.83
-2.42	-2.22	-0.907	-0.671	-0.78	-0.966				-1.96	-0.0884	-1.65	-0.343	-1.27	1.85				-0.8	2.13	2.53	0.406	0.101	3.47
-2.1	-1.19	-1.35	0.000484	-0.551	-1.2				-2.2	-0.708	-0.562	0.291	-1.04	1.91				0.172	3.49	3.44	0.101	1.79	3.03
-2.47	-2.12	-0.251	-0.372	-0.863	-0.232				-2.22	-0.811	-1.08	-0.148	0.0182	2.24				-0.48	-0.0254	3.71	0.658	2.11	3.08
-1.88	-1.64	-0.036	-1.43	-0.448	0.24				-2.37	-0.46	-0.456	-0.589	1.05	1.98				-1.41	0.364	2	-0.947	4.16	3.13
-1.89	-0.865	-1.68	-0.746	-0.35	0.774				-2.54	0.529	-1.39	0.322	0.165	2.73				-2.33	-1.24	1.52	-0.247	4.04	4.61
-2.3	-2.08	-1.96	-0.992	-0.00453	-0.391				-1.27	-0.451	-1.48	-0.157	0.0377	2.81				-2.02	-0.335	2.7	1.76	3.88	2.16
-2.37	-3.16	-2.55	-1.13	0.127	0.23				-0.722	0.539	-1.17	-0.0508	-0.0702	1.54				-1.71	1.18	5.2	1.04	3.28	3.18
-2.72	-3.49	-3.33	-1.09	-0.176	-0.588				-0.913	0.0447	-1.19	-0.45	0.497	2.34				-1.25	0.54	2.6	0.307	3.12	2.67
-1.63	-3.45	-0.585	-0.0338	0.00438	-1.97				-1.98	-0.77	-1.64	-0.0727	0.366	0.933				-1.51	-0.764	2.02	-0.042	3.78	2.92
-0.747	-3.02	-0.635	-0.535	-0.122	-1.53				-1.89	-1.16	-1.55	-0.26	0.584	3.13				-1.44	0.827	-2.14	0.715	2.21	3.17
-0.103	-3.55	-1.81	-1.07	-0.395	-1.23				-2.01	-1.37	-1.79	-0.455	0.33	2.88				-1.81	1.14	-0.11	-0.374	2.9	3.66
-0.808	-3.24	-0.299	-0.845	0.147	-1.16				-0.506	-1.03	-1.22	0.148	-0.605	2.76				-1.5	1.26	0.703	-0.223	1.16	4.5
-1.51	-3.73	-1.98	-0.452	-0.324	-1.3				-1.39	-0.985	-1.72	-0.0909	-0.344	2.01				-1.49	2.72	-0.612	1.17	0.584	4.8
-2.44	-3.11	-1.48	-1.13	-1.05	-1.29				-1.44	0.49	-0.86	0.471	-1.38	3.68				-1.6	3.13	0.317	0.449	0.611	5.24
-3.01	-2.39	-0.961	-0.886	-1.08	-0.016				-1.69	-0.954	-0.527	0.366	-1.31	2.71				-1.33	0.0288	0.583	0.575	1.14	3.4
-2.72	-2.83	-0.687	-1.26	-1.35	-0.646				-1.72	-1.38	-0.449	-0.221	-1.03	3.05				-0.914	0.948	0.0151	0.0573	0.384	3.81
-1.87	-4.45	-1.48	-1.92	-1.14	-1.1				-1.66	-1.21	-0.00479	-0.634	-0.473	0.954				-0.994	1.36	-0.739	1.41	-0.00709	4.42
-2	-3.1	-0.413	-0.816	-1.47	-1.54				-1.26	-0.908	-0.398	-1.57	-0.365	3.25				-1.52	1.19	-0.878	1.41	1.01	4.74
-2.2	-3.12	-1.92	-0.794	-1.6	-0.628				-2.17	-1.39	-0.401	-0.502	-0.379	0.931				-1.76	1.14	0.416	2.15	1.34	5.19
-1.97	-2.48	-0.0944	-1.52	-1.49	1.19				-2.6	-1.86	-0.748	-0.198	0.354	2.39				-1.92	2.53	-0.203	1.71	1.63	4.92
-1.61	-3.67	0.586	-2.09	-1.04	-0.879				-1.75	-1.41	-0.675	0.215	-1.33	2.73				-1.52	1.83	-1.22	0.61	1.57	5.41
-2.57	-2.17	-0.719	-2.51	-0.845	0.133				-2.01	-0.986	-0.335	-0.688	-1.08	2.56				-0.899	1.37	-2.51	0.405	1.99	3.35
-2.38	-1.33	0.882	-1.9	-0.88	-0.0184				-1.56	-1.68	0.00169	-0.646	-1.27	3.41				-0.249	1.59	-1.94	1.55	1.98	3.41
-3.56	-2.24	0.712	0.469	-0.713	-0.119				-2.59	-0.77	-0.49	-0.644	0.144	0.797				-0.689	1.04	-1.38	1.07	0.645	2.82
-2.76	-2.31	0.787	-1.1	-0.651	0.484				-2.29	-1.05	-0.379	-1.04	-0.402	1.75				-1.09	3.24	-1.46	0.866	1.3	4.44
-1.55	-2.29	0.522	-0.768	-1.06	-1.66				-2.55	-0.84	-0.946	-1.16	-1.41	2.06				-1.71	2.28	-2.64	-0.317	1.72	4.32
-0.876	-2.71	0.382	-2.02	-0.927	-1.52				-3.33	-0.519	0.435	-0.937	-1.81	2.11				-1.95	0.672	-1.33	0.989	-0.0268	4.29
-1.15	-3.65	-0.158	-1.41	-1.13	-1.27				-2.53	-0.864	0.0509	-0.913	-1.73	1.69				-2.36	-0.94	-1.82	0.667	0.244	3.31
-2.28	-0.414	0.0686	-1.56	-1.02	-0.779				-3.13	-0.712	0.723	-1.02	-2.12	1.54				-2.79	2.32	-1.97	-0.128	1.16	3.18
-2.41	-2.17	0.857	0.131	-1.45	-1.19				-2.16	0.106	0.672	-0.674	-1.62	0.779				-2.84	2.03	-4.25	0.737	2.65	3.37
-2.02	-3.07	0.292	-0.672	-1.31	-1.52				-2.64	0.73	0.603	-0.995	-1.92	2.47				-1.93	0.809	-2.5	0.803	1.6	4.21
-1.87	-3.82	-0.358	-0.0797	-0.802	-0.516				-2	-0.111	0.049	-1.38	-0.81	1.37				-1.52	0.819	-1.77	0.933	2.77	4.06
-1.19	-1.87	-0.521	0.114	-0.66	-1.36				-2.58	0.138	-0.32	-1.48	-1.24	1.37				-1.04	2.53	-2	4.34	1.24	4.82
-1.36	-2.4	-0.905	0.631	-1.06	-0.909				-1.88	0.257	-0.451	-1.35	-1.3	2.32				-1.57	2.07	-0.337	2.7	1.55	4.19
-0.748	-3.38	-1.12	-0.0835	-0.805	-1.28				-2.98	0.379	-1.03	-0.316	-1.36	2.3				-1.94	0.777	-1.51	2.89	0.76	4.5
-1.61	-1.46	-0.784	0.323	-0.248	-1.22				-2.85	-0.521	-1.33	-0.282	-1.23	2.42				-2.06	2.19	-1.11	2.35	1.77	3.62
-1.89	-2.13	-0.902	-0.604	-0.229	-1.17				-2.57	-0.424	-1.06	0.256	-1.49	1.4				-1.91	1.73	0.319	1.16	1.58	5.06
-1.55	-1.31	-1.26	0.395	-0.78	-1.09				-2.52	0.817	-1.09	0.00461	-1.52	1.24				-1.54	0.341	-1.12	2.29	0.00309	3.85
-0.266	-2.15	-1.26	0.345	-0.514	-0.208				-2.77	1.49	-0.675	-0.931	-1.2	1.18				-1.63	1.69	0.475	2.41	0.0115	4.22
0.436	-0.784	-1.26	1.17	-0.509	-1.51				-2.48	0.723	-0.655	-0.557	-0.572	1.66				-1.22	0.731	1.38	1.62	-1.06	4.13
0.764	-1.96	-0.0386	0.0618	-0.624	-1.17				-1.09	0.873	-0.684	-0.0865	0.756	2.29				-1.67	1.92	-0.0207	1.38	-1.25	3.21
1.02	-1.41	-0.544	1	-0.367	-2.04				-2.4	0.405	0.221	-0.53	-0.333	1.93				-2.02	2.26	0.578	0.289	-0.801	3.52
0.472	-2.12	-1.47	-0.438	-0.249	-1.08				-2.8	0.361	-0.574	-1.03	0.0425	1.25				-1.94	0.391	-0.0307	-0.295	-0.351	3.57
0.422	-0.679	-0.366	-0.161	0.261	-1.98				-3.03	0.707	-0.755	-0.784	-1.47	1.2				-1.76	2.16	-0.777	1.48	1	2.96
-0.817	-1.18	0.175	0.175	0.0147	0.311				-3.99	0.306	-0.606	-0.956	-1.63	2.47				-0.33	0.995	-1.13	0.639	1.19	2
-1.18	-1.03	-0.686	-0.245	-0.571	-0.501				-2.05	-0.108	-0.031	-1.7	-1.62	1.53				-0.71	1.77	-0.894	0.577	1.7	4.03
-2.24	-0.996	0.342	-0.304	-0.81	-0.583				-1.39	0.68	-0.6	-1.59	-1.75	-0.113				-1.26	0.688	-0.211	0.288	0.611	3.96
-2.33	-2.41	0.112	0.305	-1.02	-2.25				-0.705	0.915	-0.212	-1.15	-2.19	1.04				-2.01	0.331	-1.41	1.1	0.694	2.79
-2.72	-1.06	-0.187	-0.603	-0.767	-1.21				-0.685	0.62	-0.943	-0.236	-1.15	1.03				-2.39	1.52	-1.53	1.91	-0.35	3.73
-3.19	-1.18	0.0505	-0.154	-0.421	-1.14				-2.13	0.504	-0.572	-0.101	-1.57	2.74				-2.25	0.892	-2.33	1.84	-0.44	4.24
-1.95	-2.94	0.365	-1.07	-0.547	-1.94				-2.34	0.585	0.953	-0.385	-1.13	1.6				-1.98	-0.854	-2.86	3.15	-1.49	2.22
-1.41	-0.437	0.0464	0.392	-0.675	0.0275				-1.69	1.44	1.43	-0.558	-1.13	0.616				-1.9	0.383	-3.99	2.48	-0.296	3.74
-1.94	-1.14	1.08	-0.16	-1.6	-0.278				-2.15	0.563	0.656	-0.967	-1.55	1.25				-1.97	2.14	-2.84	3.42	0.6	1.88
-2.33	-1.98	2	-0.852	-1.2	-0.494				-1.37	0.785	0.699	-0.25	-1.33	3.05				-2.17	1.03	-2.22	3.65	-0.00911	3.92
-2.88	-3.53	0.259	-1.44	-1.22	-1.39				-2.17	0.976	0.486	-0.184	-2.4	0.597				-1.52	0.693	-0.638	3.47	0.156	4.35
-3.8	-2.48	1.03	-0.665	-0.451	-1.16				-0.327	1.17	0.701	0.163	-2.65	2.36				-1.21	2.74	-2.01	2.66	-0.761	2.35
-2.66	-2.05	1.11	-2.13	-0.959	0.0587				-1.53	0.0621	0.642	-0.854	-0.578	1.15				-1.22	0.908	-2.67	2.87	-0.174	4.6
0.0764	-1.71	0.415	-1.77	-1.31	-0.714				-1.25	1.02	1.09	-0.386	-0.125	1.57				-1.63	1.88	-4.69	2.11	-0.329	4.02
-0.964	-2.21	0.796	-1.6	-0.779	-1.44				-2	1.11	1.39	-1.16	0.795	3.07				-1.37	1.24	-3.3	0.0806	0.986	4.83
-1.87	-1.86	0.399	-1.12	-0.404	-0.226				-1.9	0.803	0.62	-1.52	0.587	1.62				-0.253	1.62	-3.62	1.62	1.61	4.65
-2.03	-0.935	0.602	-1.22	-0.908	0.774				-2.47	0.68	1.01	-1.8	0.677	1.35				-0.00467	0.464	-3.32	1.65	2.52	5.25
-2.42	-0.392	-0.344	-0.902	-0.806	-0.748				-2.99	1	0.39	-0.926	0.612	2.48				-0.339	-0.149	-2.28	1.84	1.4	6.84
-2.25	-2.43	0.187	-2.15	-1.5	-2.29				-2.67	0.402	0.615	-1.46	0.145	0.895				-0.53	1.54	-3.54	1.23	1.15	2.98
-2.24	-2.02	-1.21	-0.238	-1.44	-0.204				-2.48	0.529	0.617	-1.67	0.105	-0.138				-0.162	0.156	-3.06	0.678	1.55	4.92
-2.57	-3.1	-0.864	-0.807	-1.28	0.0321				-3.07	0.417	0.462	-3.16	-0.312	1.38				-0.354	1.09	-3.1	-0.314	1.44	5.06
-2.06	-2.91	0.476	-0.882	-0.429	-0.107				-4	-0.133	0.876	-2.8	0.0514	1.36				-0.476	2.57	-2.76	-1.46	1.74	4.26
-2.5	-3.24	-0.589	-0.622	-0.172	-1.26				-3.78	1.45	0.621	-1.82	-0.154	1.61				-0.0273	2.03	-3.06	-1.73	1.88	4.23
-3.03	-0.859	0.291	-0.983	-0.985	-1.74				-2.04	0.272	1.09	-1.82	-0.155	1.43				0.42	0.967	-2.13	-1.35	2.93	3.78
-2.54	-1.21	0.787	-0.983	-0.79	-0.374				-2.09	-0.646	0.816	-2.02	-0.0873	1.89				1.21	0.303	-1.33	-1.41	2.34	3.88
-2.49	-0.768	0.205	-0.583	-0.627	1.06				-1.45	-0.615	0.448	-1.69	-0.626	1.16				1.62	2.08	-1.02	-2.57	2.63	4.11
-3.12	-2.52	1.23	-0.761	-1.1	0.657				-1.89	-0.498	0.887	-2.9	0.569	2.23				1.17	3.11	-0.666	-0.836	2.73	2.35
-3.67	-1.68	2.49	-0.328	-1.02	-1.54				-1.21	-0.141	1.26	-2.16	0.044	2.06				0.53	1.59	-2.2	-0.135	2.19	2.89
-3.24	-2.66	3.08	-0.401	-0.917	0.478				-0.5	-0.28	0.575	-2.35	0.219	3.29				0.137	3.41	-2.36	-0.395	1.46	3.55
-3.26	-1.46	2.18	-1.61	-0.92	-0.71				-0.765	0.258	0.438	-1.91	-0.281	3.63				-0.0359	2.95	-1.21	-2.1	1.05	5.23
-3.18	-2.72	1.15	-1.36	-0.924	-0.158				-1.91	0.0263	0.0894	-1.17	0.228	0.412				-0.769	0.773	-1.23	-0.0719	2.11	4.82
-3.62	-1.12	1.21	-2.02	-0.78	-0.692				-3.06	-0.182	-0.573	-1.08	-0.721	2				-1.25	1.55	-2.06	0.0928	1.66	4.75
-3.92	0.0474	2.91	-1.58	-1.16	-0.575				-3.31	0.381	0.113	-0.388	-0.788	1.29				-0.807	1.47	-1.07	-0.223	2.21	2.69
-4.06	-2.2	2.29	-1.59	-1.76	-0.663				-2.86	-0.159	-0.0511	-0.661	0.0409	1.27				-0.363	2.49	-0.852	-0.284	2.19	3.42
-3.63	-2.85	1.58	-2	-1.94	0.285				-2.68	-0.138	-0.238	-0.44	-0.384	1.01				-0.991	2.98	-0.525	1.06	1.05	3.04
-3.16	-1.27	0.295	-2.06	-1.77	-0.696				-2.46	0.0943	0.403	-0.0768	-1.44	0.546				-0.787	1.82	-0.118	-0.24	2.14	4.12
-3.13	-2.36	1.46	-2.07	-1.39	-0.975				-2.18	0.57	-0.143	0.0856	-1.54	0.67				-0.264	2.1	-1.1	0.307	2.66	3.37
-2.57	-2.41	3.29	-2	-1.5	-3.05				-2.84	-1	-0.424	-1.01	-2.28	0.305				-1.08	1.2	-3.45	-1.63	1.83	3.31
-1.97	-3.38	2.05	-1.66	-0.97	-1.19				-3.11	-0.335	-0.776	-0.839	-2.14	0.792				-1.3	0.577	-1.13	-0.787	1.78	2.55
-2.82	-1.05	2.89	-1.67	-0.263	-0.0763				-2.2	0.263	-0.0618	-1.2	-1.87	0.363				-1.38	1.3	-2.4	-1.34	1.87	4.14
-3.65	-2.01	2.95	-0.621	-0.775	0.0933				-2.92	-0.879	0.128	-0.996	-2.43	-0.869				-0.908	1.31	-0.485	-0.949	0.564	2.83
-2.95	-0.204	2.58	-1.88	-0.921	-0.532				-2.32	-0.376	0.0464	-0.867	-2.9	2.24				-1.21	2.52	-0.928	-1.38	1.05	2.16
-3.38	-2.16	3.31	-1.01	-0.636	-0.892				-2.97	0.612	1.01	-0.631	-3.89	0.956				-1.48	0.99	-0.835	-1.27	0.704	3.43
-3.75	-1.36	2.79	-1.53	-0.755	-0.495				-1.8	-0.384	0.377	-0.917	-1.57	1.08				-0.694	1.79	-1.64	-1.67	1.5	4.35
-2.92	-2.54	1.92	-0.981	-0.981	-0.744				-0.551	0.258	-0.284	-1.72	-2.33	1.54				0.279	-0.065	-1.44	-1.17	-0.046	3.9
-2.97	-1.93	2.87	-2.02	-1.14	-0.154				-0.166	0.735	-0.034	-2.19	-2	1.18				-0.111	1.05	-2.08	-1.51	1.47	4.81
-2.46	-2.47	1.91	-0.96	-0.896	0.694				-0.639	-0.431	0.0645	-1.71	-1.97	1.42				-1.08	0.166	-0.185	-0.316	1.36	2.31
-3.52	-1.24	2.89	-0.359	-0.612	-0.585				-1.88	0.212	0.317	-2.11	-1.23	2.95				-1.69	0.998	-2.8	-1.08	0.53	2.65
-3.46	-2.29	1.73	-0.822	0.0424	-1.27				-1.89	-0.108	-0.068	-2.38	-0.622	1.33				-1.65	3.41	-1.51	0.0846	0.484	3.63
-3.68	-1.08	1.12	-0.449	0.321	-0.314				-1.88	-0.0408	0.0262	-1.41	-0.282	-0.427				-1.75	1.38	0.206	-1.15	-0.0305	4.06
-3.73	-1.75	1.79	-0.101	0.15	-2.2				-2.78	-0.512	-0.32	-2.15	0.0731	1.8				-2.32	0.653	0.911	-0.997	0.0831	3.26
-3.8	-0.732	2.96	-0.756	-0.0398	-1.96				-2.85	0.328	-0.33	-1.55	0.719	1.68				-2.66	0.318	0.27	-1.52	0.325	3.65
-3.56	-1.41	2.07	-0.81	-0.413	-0.29				-3.23	-0.761	-0.536	-2.01	1.11	0.875				-2.67	0.908	-1.52	-1.35	-0.507	3.23
-3.82	0.774	1.88	-1.04	-0.329	-0.0762				-1.63	-1.09	-1.28	-1.97	1.84	-0.00803				-2.15	1.67	-3.2	-0.787	-0.498	4
-4.32	-1.13	2.17	-0.0726	-0.402	-1.19				-0.277	-0.973	-1.14	-2.42	1.4	-1.32				-2.08	-0.192	-2.02	-1.18	0.283	4.15
-4.19	-0.548	1.63	-1.07	0.28	-1.01				-0.531	-0.577	-1.04	-1.84	0.573	1.75				-2.32	2.17	-1.62	-1.42	-0.524	4.15
-4.26	-2.3	0.936	-1.32	0.831	-1.41				-0.874	-0.486	-1.05	-2.47	-0.905	0.0967				-2.61	0.692	-2.52	-3.11	-1.14	3.71
-3.94	-1.11	0.887	-1.02	1.29	-1.78				-1.74	-0.0589	-1	-2.02	-0.592	0.949				-2.82	0.828	-2.54	-2.24	-0.83	2.94
-3.33	-2.17	0.494	-1.87	1.2	-1.58				-2.48	0.554	-0.589	-2.41	0.231	1.39				-3	2.42	-1.01	-2.37	-0.135	4.41
-2.35	-1.09	-1.08	-0.266	0.726	-0.369				-1.94	-0.32	-1.05	-2.17	-0.0795	1.32				-3.1	2.56	-2.09	-2.79	0.0441	3.74
-2.03	-0.967	0.154	0.261	0.307	0.0448				-2.08	-0.997	-1.05	-1.63	0.593	1.75				-2.83	1.67	-2.31	-2.63	0.13	2.31
-2.87	-0.277	-1.48	0.27	0.256	0.623				-0.531	0.892	-1.25	-0.836	-0.41	3.19				-2.68	0.616	-0.479	-2.21	0.041	3.65
-3.27	0.2	-0.684	-0.38	0.309	-0.419				-0.313	0.771	0.0883	-1.52	-0.41	1.53				-2.62	0.62	-2.84	-2.7	0.526	1.87
-3.55	-1.74	-0.505	0.0889	0.981	-0.747				0.0432	-0.462	-0.0858	-1.48	-0.0527	1.09				-2.8	4.04	-0.889	-0.507	-0.18	2.66
-3.63	-0.556	-1.44	-0.00735	1.42	-1.82				-1.04	-0.693	0.0458	-1.14	0.427	0.933				-3.24	0.292	-2.98	-0.283	-0.431	2.29
-3.55	-1.03	-2.03	0.677	1.53	-1.48				-2.25	-0.508	-0.895	-1.21	0.141	1.73				-3.22	0.305	-0.743	-0.474	-0.63	2.93
-3.64	-2.18	-1.18	0.546	1.59	-0.979				-2.8	-0.00122	-0.474	-1.74	-0.546	0.597				-3.01	2.02	0.156	-0.948	-0.642	1.05
