# Supplementary material for: Metabolic sensing in AgRP neurons integrates homeostatic state with dopamine signalling in the striatum
Source: eLife journal article supplement (doi:10.7554/elife.72668), 2022-01-12
Supplement: fig5-data1 [file Fig5J.xlsx]

## Sheet: Sheet1
	WT									KO
NFO	-1.50533	-0.451066	-0.57527	0.948162	0.0502532	0.641777				0.203567	0.584222	-0.2039	-0.322473	0.35696	0.33509	-0.452562
Chow	-1.14028	1.14431	-0.242211	0.0245988	0.319112	3.14743				1.15875	1.01669	1.19354	-0.200288	0.065746	2.12366	0.832292
PB	-0.956564	4.20101	-0.690349	1.18192	1.76647	2.88289				2.12753	0.964781	4.7925	0.935383	0.622902	1.4782	1.60852
