# Supplementary material for: Metabolic sensing in AgRP neurons integrates homeostatic state with dopamine signalling in the striatum
Source: eLife journal article supplement (doi:10.7554/elife.72668), 2022-01-12
Supplement: fig5-data1 [file Fig5K.xlsx]

## Sheet: Sheet1
	WT									KO
NFO	-2.04873	-1.45022	0.276064	-0.24722	-0.296434	0.315874				0.391471	-0.918719	-1.27508	-0.665378	-0.306689	0.563506	-0.442983
Chow	-1.82876	0.0297368	-0.497539	-0.835743	-0.0798798	1.87059				-0.0856594	0.0428705	-0.194251	-0.811165	-0.779439	2.30612	0.805952
PB	-1.56446	2.11702	-0.845551	0.459099	1.02455	4.08124				-0.0368469	0.616735	3.03898	0.877419	1.09311	1.82999	1.50431
