# Supplementary material for: Metabolic sensing in AgRP neurons integrates homeostatic state with dopamine signalling in the striatum
Source: eLife journal article supplement (doi:10.7554/elife.72668), 2022-01-12
Supplement: fig5-data1 [file Fig5L.xlsx]

## Sheet: Sheet1
WT								KO
		0.43	0.305	0.242	-0.362	0.182	-0.0893				-0.489	0.443	-1.19	-1.31	-0.951
		0.601	-0.066	1.76	-0.889	0.0224	-0.302				-0.522	0.335	-0.902	-0.0816	0.0225
		-0.592	-1.54	2.45	-0.4	-0.4	-1.1				0.0592	-0.609	-0.615	-1.58	-0.00988
		-0.0524	-0.599	3.42	-1.07	-0.82	-1.57				0.252	-0.492	0.00655	-2.34	0.955
		0.793	-1.59	2.69	-0.376	-0.806	-1.58				0.39	1.06	0.262	-2.31	2
		-0.173	-1.34	0.118	-0.675	-1.18	-1.81				0.331	0.384	-0.382	-0.0364	1.42
		0.435	-0.889	-0.123	-0.882	-0.671	-1.8				-0.191	-0.199	0.268	-2.43	0.477
		0.983	0.59	0.691	-0.817	-0.663	-2.22				-0.166	-0.157	0.241	0.851	1.18
		1.51	-1.23	0.383	0.32	-1.19	-0.942				-0.666	-0.565	-0.782	0.313	0.856
		0.546	-1.55	1.23	-0.604	-1.36	-1.62				-1.19	-0.746	-0.651	0.0114	1.81
		-0.232	-0.367	1.33	1.06	-2.04	-1.27				-1.29	-0.829	-0.458	-0.201	1.35
		-0.0717	-0.0892	0.445	0.35	-1.76	-1.01				-1.68	-0.713	-0.631	0.208	2.07
		0.567	0.94	-0.476	-0.114	-1.22	-1.07				-1.51	-1.96	-0.732	-1.25	1.86
		1.32	-0.247	-1.27	-0.475	-0.291	-0.121				-1.16	-1.01	-1.39	-0.403	1.77
		1.71	-1.95	-0.33	-0.57	-0.732	0.161				-0.738	-0.238	-0.968	0.0235	0.661
		0.406	-2.43	-0.095	-0.0836	-0.357	0.0676				-1.57	0.32	-1.42	-1.47	-0.214
		1.56	-1.49	-0.0558	-0.294	-1.04	-0.626				-1.51	-0.912	-1.04	-0.479	0.893
		0.486	-1.69	1.26	-0.216	-1.1	0.341				-1.42	0.638	-0.907	-0.629	0.133
		0.317	0.109	0.312	0.915	-0.99	0.456				-1.94	1.83	0.233	-0.831	0.795
		0.642	-0.0318	-1.13	1.02	-0.633	0.122				-1.73	0.983	-0.344	-0.805	1.84
		1.04	-0.142	0.354	1.75	-0.626	0.437				-2.36	2.88	-0.156	-0.347	1.54
		-0.261	-0.915	1.39	2.38	-0.0895	0.657				-1.86	0.244	0.543	0.388	0.303
		0.732	-0.347	-0.296	2.13	-0.0546	1.76				-0.809	0.974	0.0338	0.897	-1.76
		0.34	-1.66	-0.107	1.18	0.603	1.33				-0.643	1.61	1.17	-0.0803	0.0129
		0.21	0.673	0.0536	1.74	-0.318	0.618				-0.394	1.57	0.604	0.334	0.138
		0.867	-0.904	0.354	1.62	-0.0197	0.0971				-0.824	1.1	-0.241	0.808	1.48
		-0.198	-0.354	0.0644	1.85	1.01	-0.845				-1.08	1.98	-0.624	0.951	-0.277
		0.469	0.472	-0.122	1.32	1.54	-1.46				-1.2	0.904	-1.51	0.383	0.452
		1.96	-0.733	-0.963	1.2	1.17	-1.09				-0.821	0.0578	-1.26	0.97	-0.133
		1.79	-2.48	-0.323	1.77	0.782	-0.627				-0.0727	0.64	-0.935	-0.159	0.626
		0.774	-0.68	-0.201	0.82	1.22	-0.499				0.103	1.06	-1.38	0.661	-0.988
		1.62	-0.739	0.409	0.41	1.38	-0.86				-0.0707	1.15	-1.92	0.0478	-1.78
		1.95	-0.0435	1.6	0.472	1.05	-0.493				-0.0204	1.13	-1.43	-1.72	-0.763
		1.73	-1.68	0.0323	-0.117	0.785	-0.883				0.0566	1.88	-0.841	-0.534	-0.261
		1.96	-1.04	0.303	0.435	0.966	-0.579				-0.0898	1.08	-0.799	0.86	0.0456
		0.614	-1.29	-0.956	-0.486	1.43	-0.816				-0.562	0.972	-0.194	0.117	-0.99
		1.45	-1.42	0.525	-0.27	1.68	-0.69				-0.862	0.162	-0.0203	-0.289	-0.453
		0.73	-0.914	-0.818	-0.627	2.26	-0.559				-0.361	-0.526	0.322	-0.494	-2.46
		0.168	-0.598	0.727	0.264	2.15	0.219				-0.267	0.0586	-0.262	0.853	-1.18
		0.196	-0.513	-0.654	-0.0282	1.99	0.568				-0.134	1.4	0.0699	-2.14	-1.43
		-0.428	0.139	0.0964	-0.498	1.49	-0.0802				-0.363	0.836	0.705	0.00995	-1.63
		-0.189	0.784	0.396	0.498	1.52	-1.56				-0.734	0.699	0.373	-0.261	-0.632
		-0.604	0.796	0.189	0.12	1.48	-1.59				-0.919	0.822	0.667	1.23	-0.996
		-0.345	0.0765	-0.104	-0.273	1.2	-1.19				0.206	0.665	1.84	-0.424	-1.12
		-1.15	1.18	-0.372	0.186	1.27	-0.825				0.681	1.16	3.16	-0.454	-0.925
		-0.0736	-0.443	0.14	0.416	1.72	-0.955				1.06	0.536	2.17	1.17	-1.04
		-0.684	-0.961	0.403	0.801	1.39	-1.05				0.752	0.767	2.06	-0.342	-1.25
		-0.905	1.56	-0.0701	1.56	1.48	-0.49				1.03	0.284	2.44	0.94	-1.36
		-1.34	0.865	1.38	1.14	1.71	0.142				0.744	-0.649	1.81	2	-0.849
		-0.959	0.11	0.493	1.29	1.37	-0.787				0.535	-1.1	0.923	1.12	-0.0509
		-0.255	-0.00306	0.257	2.14	1.36	-0.19				0.62	-0.941	1.31	2.15	0.181
		0.216	1.24	-1.22	0.593	0.828	1.09				0.596	-1.19	1.26	1.59	-0.99
		-0.369	0.202	-0.678	0.0176	0.0112	1.7				0.861	-0.629	0.791	-0.213	0.36
		0.133	0.14	0.646	-1.19	0.171	1.57				0.713	-0.685	0.803	-0.784	1.86
		0.141	-0.416	0.949	0.844	0.394	1.28				0.0354	-0.442	1.18	-0.101	1.29
		0.33	-0.0481	-0.682	0.412	0.0342	0.58				0.541	-1.76	1.26	0.777	1.25
		0.504	-0.369	-1.98	1.03	0.444	-0.572				0.663	-1.76	0.315	0.621	0.787
		1.19	-0.85	-2.58	0.607	0.569	-1.26				1.73	-0.237	-0.151	1.11	0.362
		1.03	-0.34	-1.8	0.751	0.489	-1.28				2.33	-0.583	0.54	0.592	-0.287
		1.51	-0.228	0.536	1.82	0.328	-0.595				2.34	0.0529	1.04	0.417	-0.189
		1.27	-0.722	1.04	1.78	0.208	0.849				1.72	-1.3	1.05	1.74	-0.695
		1.6	0.433	0.451	0.831	0.466	0.965				1.84	0.25	0.455	1.87	-0.671
		1.09	0.811	0.335	-0.116	0.229	0.355				2.23	-0.879	0.59	0.0745	0.859
		0.772	1.47	-0.6	-0.0761	0.408	1.82				2.04	-0.359	0.0644	0.218	0.193
		0.756	0.0719	0.116	0.146	-0.042	2.03				1.66	-0.8	-0.0072	-1.12	0.182
		0.752	0.309	1.64	0.679	0.0172	1.73				0.854	0.785	-0.524	1.61	-0.894
		-0.676	-0.284	-0.233	0.443	-0.847	2.41				-0.229	0.442	0.698	1.8	-0.289
		-1.26	0.818	1.23	-0.855	-0.819	1.4				-0.625	1.22	0.802	0.45	-1.33
		-0.666	1.5	-1.08	-0.845	-0.225	0.989				-1.29	0.221	0.876	0.557	-0.774
		-0.985	-0.484	0.0433	-0.678	0.00594	1.11				-1.6	1.08	0.682	-0.881	0.277
		-0.719	0.987	-0.00211	-0.825	-0.581	0.937				-0.492	-0.107	-0.168	-1.14	1.09
		-0.819	1.91	-0.251	-0.632	-0.561	1.31				-0.314	0.276	0.143	0.207	0.243
		0.133	1.65	-0.938	-0.713	-0.223	0.781				-1.23	0.65	0.584	0.678	1.59
		-1.34	0.359	-0.029	-0.345	-0.347	0.332				-1.25	-0.621	0.189	0.7	0.99
		-1.55	1.72	1.33	-0.942	-0.462	0.601				-0.644	0.614	0.501	0.819	0.209
		-1.58	1.49	-1.37	-1.45	0.112	1.28				-0.175	0.952	0.0574	1.08	-0.549
		-0.655	1.14	-1.42	-1.1	-0.208	1.23				-0.12	1.09	-0.127	1.47	0.076
		-0.29	2.52	-0.737	-0.592	-0.527	0.589				0.444	0.433	-0.724	0.13	-0.254
		-1.44	0.283	-0.806	-0.557	-0.663	0.82				0.446	-1.24	-0.779	-0.722	0.362
		-0.171	-0.525	-0.902	-0.87	-0.681	0.396				0.533	-0.801	0.103	0.266	0.423
		-1.37	-0.594	-0.0199	-1.51	-0.853	0.713				0.733	-2.15	0.85	-0.42	-0.854
		-1.69	0.896	-0.76	-2.2	-0.721	0.632				1.95	-1.3	0.921	0.826	0.602
		-1.33	0.27	0.0122	-0.918	-1.2	0.592				0.913	-1.01	-0.302	0.937	-0.765
		-0.519	0.372	-0.906	-1.55	-0.931	0.723				0.243	-0.679	-0.0178	-2.17	0.174
		-0.424	1.79	-2.62	-1.19	-1.33	1.57				-4.13e-05	-1.55	-0.104	-1.48	-0.756
		-1.23	-0.058	0.266	-0.598	-1.29	0.888				0.313	-0.44	0.474	-1.16	0.563
		-1.01	0.274	0.976	0.0182	-1.29	0.701				0.532	0.0987	0.979	0.387	1.1
		-1.81	0.666	-0.115	0.0907	-0.907	0.717				0.626	-0.741	0.398	0.505	0.619
		-1.14	-0.492	0.472	-0.0254	-1.46	-0.0104				0.981	-0.269	0.474	0.026	0.389
		-1.66	0.562	-0.487	0.104	-0.962	0.197				0.638	0.793	-0.106	-0.788	-0.5
		-1.2	0.397	0.811	-0.246	-0.928	-0.669				0.766	0.977	-1.54	-0.693	-2.27
		-0.975	1.01	-1.24	-0.268	-0.698	-0.417				0.639	0.367	-1.87	-0.32	-1.16
		-0.927	0.951	-0.536	-0.974	-0.646	-0.246				0.773	-0.776	-2.45	-0.465	-0.531
		-0.00692	0.791	-1.05	-0.701	-0.658	-0.324				0.415	-1.73	-1.66	0.142	-1.26
		0.288	0.867	-0.931	-0.718	-1.13	-0.054				0.478	-0.803	-0.915	-0.746	-0.276
		-0.482	0.746	0.698	-1.06	-1.07	-0.123				0.264	-0.327	-0.974	-1.71	-0.605
		-1.6	0.411	0.471	-0.894	-1.39	-0.691				0.588	-1.2	-0.45	-0.747	0.163
		-0.582	0.0329	-1.32	-1.4	-0.451	-0.772				0.437	-1.32	-0.156	-0.285	-0.797
		-0.92	1.56	0.0427	-1.95	0.0401	-0.0716				0.413	-1.31	-1.26	-0.449	0.289
		-1.17	1.11	-1.23	-1.54	0.76	0.184				0.19	-0.67	-1.46	-0.147	-0.0257
		-1.53	0.000837	-0.571	-1.69	0.732	0.302				-0.114	-1.61	0.439	1.06	-0.948
		-1.68	-0.999	-0.291	-2.08	0.228	0.0788				-0.144	-0.785	-1.16	1.47	-0.348
		-0.698	-0.00129	-0.778	-0.875	0.283	0.856				-0.053	0.61	-0.252	0.113	-1.28
		-0.685	-0.78	-1.42	-1.55	0.0696	0.528				-0.04	-1.46	-0.996	0.122	-0.953
		-1.89	-1.55	-1.97	-1.4	0.299	0.0494				-0.0955	1.08	-1.19	0.964	-2.37
		-0.575	-1.36	-0.897	-1.53	0.211	-0.402				-0.179	0.0943	-0.351	0.806	-1.22
		-0.161	-1.79	-0.813	-1.69	0.328	0.0173				-0.299	-0.185	-0.647	0.0311	-0.889
		-0.403	-0.873	-1.08	-1.55	-0.0815	-0.185				0.231	-0.817	0.105	0.0766	0.122
		-0.298	-0.417	0.613	-1.99	-0.0596	-0.174				-0.0198	0.0221	-0.783	0.205	0.274
		-0.56	1.13	-0.56	-1.79	0.22	0.0178				0.191	-0.702	0.369	0.209	0.307
		-0.724	-1.48	-0.737	-2.1	0.557	-0.613				-0.0927	-0.618	1.68	0.766	-0.713
		-0.425	-1.41	-0.275	-0.971	0.529	-1.59				-0.212	0.221	1.45	-0.219	-0.502
		-1.34	-2.24	-0.186	-1.19	0.295	-0.613				-0.539	0.665	0.816	-0.611	-1.18
		-1.8	-1.21	-0.557	-1.86	0.553	-1.12				-0.144	1.41	-0.0188	-0.607	-0.703
		-0.976	-1.11	-0.776	-0.982	0.364	-1.34				0.515	2.55	0.0962	-0.0811	1.37
		-0.108	-0.28	-1.09	-1.55	0.112	-0.811				0.387	1.25	-0.832	1.05	3.33
		-0.296	0.241	-1.03	-2.22	0.182	-0.63				1.01	1.72	0.463	-1.42	1.36
		0.891	-1.03	-1.53	-1.62	0.733	-0.753				0.139	-0.187	0.927	1.48	1.38
		0.274	-0.337	-0.612	-0.6	0.614	-0.774				0.218	0.134	-0.0131	1.18	0.522
		-0.336	-0.334	-1.3	-1.04	0.96	-0.555				-0.271	0.5	1.36	-0.106	-1.14
		-1.67	0.277	-0.823	-2.85	0.448	-0.438				-0.814	0.612	3.26	0.521	-2.09
		-0.473	-0.196	-0.0184	-2.46	0.606	-1.01				-0.563	0.799	1.4	1.66	-0.588
		-0.372	0.295	-0.366	-2.61	0.677	-0.0951				-0.29	-0.631	3.52	0.947	0.277
		0.276	0.373	-1.07	-2.17	0.308	0.0302				-0.877	-0.562	3.06	0.136	-0.878
		0.48	0.294	-0.691	-1.43	0.368	-0.0864				-0.829	0.485	2.47	0.205	1.06
		0.0087	0.235	-0.754	-2.19	0.448	-0.322				-0.392	0.458	1.82	0.994	-0.935
		0.441	0.0765	-0.847	-0.946	0.36	-0.0627				0.226	0.301	1.26	-0.0641	-1.33
		0.294	-0.98	1.02	-1.15	0.219	0.0195				1.41	0.0509	0.671	-0.375	-1.44
		-0.00833	0.275	1.48	-1.25	0.083	0.145				1.73	-0.847	1.06	-0.613	0.111
		-0.213	-0.144	1.42	-2.21	0.364	-0.213				1.7	-0.639	-0.129	1.37	1.08
		-0.64	0.191	0.0471	-3.04	0.385	-0.0971				1.22	-0.8	0.498	2	1.16
		-0.59	-1.06	1.3	-2.37	0.232	-0.045				1.12	-1.09	-0.349	1.62	-0.458
		-0.528	-0.255	0.761	-2.92	0.189	0.249				0.908	-0.242	0.662	0.532	-1.11
		1.14	1.03	0.691	-2.56	-0.0446	0.119				0.221	-1.4	-1.15	1.78	-2.16
		0.945	0.28	-0.72	-2.41	0.357	0.414				0.44	-1.06	-0.874	1.32	-1.81
		-0.0735	-1.23	-1	-2.62	0.301	0.202				0.662	-0.0954	-1.54	1.18	-1.24
		-0.0933	1.32	0.375	-2.61	-0.094	-0.243				1.19	-1.08	-2.4	1.08	-1.23
		-0.693	1.79	0.676	-2.1	0.47	-0.282				1.73	-0.693	-3.28	-2.38	-0.925
		-0.699	1.28	0.605	-2.43	0.594	-0.459				1.64	-0.879	-2.45	1.07	-0.835
		0.121	1.68	1.54	-2.15	0.254	-0.25				1.67	0.703	-2.26	0.54	-1.72
		-0.0963	2.48	2.45	-1.87	0.645	-0.411				1.35	-1.85	-2.43	1.15	-1.96
		0.733	0.573	2.82	-2.02	0.553	-0.0778				1.82	-1.84	-1.08	-0.0317	-1.86
		0.577	0.948	4.1	-1.94	0.506	-0.382				1.7	-1.02	-2.05	0.34	-1.14
		-0.179	2.08	3.05	-1.78	0.263	0.0241				1.41	-1.37	-0.397	2.38	-1.08
		0.402	2.47	4.06	-2.48	-0.371	-0.426				0.969	-0.321	-0.626	0.457	-0.153
		-0.816	1.96	2.13	-2.08	-0.435	-0.502				0.686	-1.06	-0.77	0.76	-1.28
		0.515	2.21	1.9	-1.63	-0.653	-0.291				0.335	-0.376	-0.6	0.503	0.218
		0.56	1.63	2.42	-1.09	-0.713	-0.26				0.805	-1.65	-0.0668	1.27	-0.624
		1.49	2.26	4.03	-1.74	-0.427	0.0693				0.856	0.934	0.338	1.44	-0.961
		1.14	1.56	2.26	-2.06	-0.6	-0.269				0.763	1.14	1.41	0.519	-1.22
		1.11	1.79	2.64	-2.42	-1.2	-0.0523				1.1	0.556	1.14	1.66	-1.61
		0.295	1.1	2.74	-1.61	-1.48	0.969				1.36	0.193	0.631	0.228	-1.47
		0.376	1.22	1.29	-1.13	-1.72	0.275				1.17	0.0953	4.31	0.42	-2.33
		1.32	2.41	2.38	-1.21	-1.87	-0.22				0.949	-0.814	3.83	0.835	-0.738
		2.11	1.87	2.43	-1.41	-1.66	0.107				1.21	0.135	3.19	0.0952	-0.896
		1.92	0.663	2.78	-2.43	-1.2	0.825				0.443	-0.5	3.16	1.96	-0.665
		1.09	0.149	3.06	-1.9	-1.64	-0.0573				-0.452	0.575	2.67	1.06	0.684
		2.44	0.133	3.05	-1.43	-1.36	0.274				0.000999	0.39	5.36	-1.44	-0.222
		2.07	-0.306	2.6	-1.19	-1.14	0.993				-0.241	-0.19	4.78	0.0606	-0.145
		2.43	-0.252	2.25	-0.188	-1.08	0.948				-0.616	0.301	3.74	0.0855	-0.744
		2.8	0.131	1.44	-0.572	-0.738	0.485				-1.26	-0.117	2.71	0.302	-0.746
		2.17	-1.65	2.08	0.254	-0.672	0.591				-1.08	0.388	2.96	1.36	1.03
		2.94	-1.15	1.82	0.394	-0.831	0.589				-1.19	0.567	2.3	1.47	-0.08
		2.79	-1.12	1.57	0.0165	-1.03	0.269				-0.773	-0.408	2.26	2.28	3.57
		3	-0.0222	1.95	0.79	-1.4	-0.383				-0.685	0.243	1.68	0.638	1.92
		2	-0.593	2.78	0.698	-1.52	0.742				-0.959	-1.32	2.28	0.581	1.64
		2.77	-0.31	3.41	1.35	-1.36	0.262				-0.698	-1.55	2.69	-0.0253	1.49
		2.71	-1.33	2.55	-0.0755	-0.779	-0.711				-0.927	-0.935	1.3	0.393	0.309
		2.64	0.0301	1.61	0.277	-0.142	-0.69				-1.24	-0.91	0.916	0.679	0.0337
		2.09	0.0852	1.6	-0.199	-0.0265	-0.655				-1.01	-0.467	1.33	0.863	0.639
		2.34	-0.364	0.448	-0.704	0.499	-0.728				-1.43	-1	1.07	1.6	0.791
		1.69	0.338	1.2	-1.03	0.619	-0.543				-1.28	-0.913	1.71	1.16	-0.185
		1.87	-1.68	0.652	-1.75	0.493	-1.02				-1.05	0.164	0.76	0.179	-0.13
		1.83	-0.183	1.52	-1.06	0.054	-1.12				-0.665	-1.09	1.16	2.17	-0.962
		2.72	-0.526	1.83	-0.989	-0.397	-1.25				-0.855	-1.39	-0.218	2.6	0.0967
		1.79	-1.36	1.62	-0.708	-0.358	-1.03				-0.523	-1.39	0.585	2.83	-0.604
		1.44	1.29	2.44	-0.984	-0.384	0.388				-0.84	-1.42	1.16	2.77	0.111
		1.9	0.217	0.62	-1.69	-0.16	-0.597				-0.578	-0.044	0.12	2.37	-0.427
		1.36	0.954	-0.0879	-1.07	-0.284	1.16				-0.962	-0.446	-0.449	1.33	0.0195
		1.86	-0.0683	2.36	-1.59	-0.00143	0.686				-0.941	1.03	-1.3	2.12	1.95
		1.48	-0.828	1.35	-0.843	0.0219	2.01				-0.646	-0.119	-0.787	1.5	1.62
		2.14	-0.479	1.73	-1.66	0.674	1.73				0.118	-1.19	-0.139	2.48	1.01
		2.13	-1.15	2.46	-1.63	2.19	1.97				2.5	-0.641	-0.941	1.45	1.8
		2.19	-1.35	1.2	-1.2	3.75	0.266				3.12	0.225	-0.637	0.198	2.21
		2.09	0.093	1.87	-0.598	3.27	0.621				2.94	0.0346	-1.1	2.48	1.87
		2.24	-0.622	2.42	-0.684	3.45	0.676				2.89	-1.05	-1.32	3.37	2.89
		1.86	-1.91	2.67	-1.03	3.29	1.37				3.2	-0.213	-1.18	3.19	2.07
		3	-2.19	3.18	-1.28	3.19	1.18				3.17	1.16	-2.04	2.94	2.02
		2.73	-0.327	2.27	-0.93	3.04	0.95				3.26	2.93	-1.59	4.98	2.65
		2.49	-0.162	1.41	-0.245	2.68	1.43				3.24	2.69	-2.07	2.74	2.9
		2.35	-0.374	3.31	-0.994	3	1.17				3.54	2.71	0.922	3.04	2.1
		3.14	0.82	3.14	-1.3	2.91	1.75				3.7	2.48	1.33	3.85	1.62
		2.36	1.3	3.95	-1.86	2.84	1.46				3.85	4.52	0.116	1.03	3.39
		2.83	-0.186	2.7	-1.2	2.59	1.56				3.97	5.25	1.35	4.31	4.14
		2.42	0.284	3.47	-1.89	2.63	0.984				3.43	6.33	2.59	6.8	3.27
		1.74	-0.652	3.65	-1	2.47	1				4.18	6.07	1.42	5.84	2.79
		2.05	-0.226	4.1	-1.04	2.69	0.154				4.53	5.62	2.24	6.47	4.02
		1.9	-2.06	1.97	-1.34	2.33	0.052				4.49	4.8	1.48	3.97	3.74
		2.32	-0.0715	2	-1.01	2.6	0.251				4.12	3.42	1.13	5.61	3.3
		1.21	-0.57	1.76	-0.802	2.33	0.224				3.55	3.19	0.628	4.24	3.08
		2.2	-1.17	1.63	-1.1	2.38	-0.124				3.3	4.52	0.281	5.67	4.22
		1.91	-1.2	1.65	-0.838	2.54	-0.534				2.58	4.95	1.06	3.84	3.25
		2.94	-0.67	0.592	-0.704	2.31	-0.903				2.53	4.34	-1.35	5.21	4.99
		3.38	0.466	1.36	-0.311	2.4	-1.55				2.02	5.17	0.473	5.21	5.7
		4.04	1.19	0.78	-0.375	2.81	-1.27				2.13	5.71	0.521	5.56	4.84
		4	1.82	2.21	-0.487	3.07	-1.07				2.59	5.63	-0.532	5.98	4.77
		3.31	0.747	2.59	-1.08	2.85	-1.01				2.74	4.48	-0.1	4.57	4.62
		3.21	0.83	0.983	-0.111	2.72	-1.02				2.14	4.13	0.486	2.67	4.46
		3.37	1.87	2.53	-0.202	2.48	-0.265				1.84	4.56	0.633	3.53	3.33
		3.43	1.42	2.91	-1.12	2.23	-0.378				2.36	5.03	-0.133	5.04	3.51
		3.52	0.915	2.56	-0.854	1.67	-0.131				2.15	2.46	0.0284	4.08	1.98
		3.25	1.07	2.78	-1.06	1.75	-0.505				2.59	3.46	0.496	5.4	3.02
		3.04	1.39	3.65	-1.45	1.56	-0.579				3	3.36	1.34	5.23	3.15
		2.81	2.46	1.6	-1.66	1.44	-0.908				2.71	2.43	0.662	4.25	2.81
		2.83	1.37	2.15	-2.03	1.22	-0.308				2.33	3.28	0.544	2.41	2.21
		1.71	1.43	2.41	-0.545	1.29	-0.406				2.29	3.8	-1.04	1.52	2.89
		2.72	1.06	2.05	-1.11	1.47	-0.757				1.85	2.71	-0.789	3.4	1.36
		2.62	0.944	2.37	-0.918	1.16	-0.373				2.06	3.09	-0.898	3.45	2.71
		1.93	-0.0569	2.04	-1.26	1.14	0.608				1.38	3.68	-0.624	3.59	3.61
		3.1	1.77	2.03	-1.19	1.44	0.928				1.42	4.59	-0.618	4.68	3.4
		2.72	1.11	2.52	-1.47	1.74	1.66				1.1	4.49	-0.0438	4.93	3.7
		3.14	1.16	1	-1.54	1.24	0.797				1.02	4.33	-0.588	3.18	2.4
		2.29	2.33	2.03	-0.831	1.71	1.72				0.949	2.87	-0.235	3.69	1.39
		2.5	1.87	2.8	-0.851	1.64	1.39				1.03	3.14	-1.11	2.48	3.22
		1.55	1.62	1.66	-1.01	1.4	1.06				1.25	3.75	-1.06	4.36	2.21
		3	0.663	1.09	-1.63	1.18	1.11				1.57	3.5	-0.561	2.65	2.64
		2.19	1.9	0.276	-0.875	1.44	0.82				1.21	4.39	-0.6	4.73	2.16
		1.88	0.584	1.93	-1.26	1.38	0.121				1.4	3.39	-0.399	4.04	2.34
		2.72	0.782	0.678	-0.389	1.7	0.787				0.91	2.77	-0.224	2.19	3.03
		3.45	1.98	1.19	-0.76	1.34	1.03				1.09	2.52	-0.753	3.28	2.86
		3.2	1.39	2.04	-0.384	1.87	1.44				0.95	3.01	-0.11	2.51	2.04
		3.54	1.93	0.691	-1.13	2.1	1.09				1.07	3.83	0.692	3	2.31
		3.43	2.66	1.5	-0.384	2.71	0.693				0.775	2.65	0.596	2.94	2.61
		3.09	2.83	1.18	-0.595	2.61	0.872				0.716	2.94	0.485	3.62	3.11
		2.85	3.58	3.07	-1.24	2.25	0.512				0.887	3.58	-0.343	3.29	3.32
		3.57	1.57	2.68	-0.638	2.5	0.835				0.898	4.05	-0.555	4.72	3.09
		3.33	2.06	2.11	-1.16	2.24	0.195				0.789	3.47	-1.03	3.98	3.91
		3	2.94	2.35	-1.59	2.27	0.464				0.594	5.16	-1.58	4.71	3.25
		3.22	3.47	2.47	-1.07	1.92	0.507				0.752	4.87	-0.474	3.66	4.72
		2.58	2.92	2.21	-1.8	2.04	0.719				0.746	3.71	-0.797	4.54	2.85
		3.08	2.38	1.96	-1.15	2.34	0.387				0.676	4.44	-0.689	4.89	2.66
		2.88	3.46	2.7	-0.808	2.74	0.189				0.943	3.62	-0.316	5.19	3.34
		3.49	2.37	0.444	-1.16	2.34	-0.256				1.09	3.07	-0.32	5.02	3.51
		1.66	2.16	2.31	-1.23	2.24	-0.366				0.796	3.21	-0.12	3.61	3.57
		3.19	3.28	1.8	-1.08	1.9	0.995				0.658	3.47	-1.13	3.93	3.08
		2.53	3.4	1.85	-0.87	1.8	0.68				0.69	2.57	-0.605	4.92	2.77
		2.23	3.51	3.46	-0.621	1.81	0.98				1.01	3.32	-1.17	2.73	4.19
		2.97	4.1	3.17	0.065	1.59	1.11				1.04	3.09	-1.29	3.46	4.56
		2.71	2.44	3.12	-0.327	1.17	0.912				0.802	2.59	-1.3	2.87	3.4
		2.85	3.1	3.08	-0.434	1.1	0.371				0.895	2.67	-0.986	3.9	3.41
		2.84	3.83	1.58	-0.599	1.1	0.507				0.851	2.63	-1.2	4.26	4.85
		1.65	2.09	2.94	-0.403	1.43	1.1				0.959	3.46	-0.857	4.11	3.43
		1.76	4.46	2.52	-0.307	1.61	0.951				0.81	3.77	-0.121	3.64	2.94
		3.57	3.47	2.2	-0.548	1.41	0.677				0.546	3.47	-0.98	4.72	3.41
		2.95	2	1.62	-0.286	1.31	-0.232				0.49	4.75	-1.18	4.11	3.36
		2.42	3.96	1.9	0.186	1.54	0.458				0.827	4.04	-1.6	2.9	2.71
		3.96	2.92	3.18	0.0636	1.32	0.224				0.494	3.52	0.168	4.08	2.65
		2.64	2.87	1.85	-0.105	1.14	0.0607				0.646	3.65	-0.0845	3.75	2.8
		3.05	4.21	1.85	0.248	1.04	-0.584				0.547	2.5	0.00601	4.19	2.62
		3.32	4	2.76	-0.928	1.01	-0.547				0.728	3	-0.339	3.81	2.1
		2.28	3.7	3.05	-1.22	0.869	-0.112				0.539	2.62	-0.691	5.64	3.53
		3.15	2.73	1.55	-0.718	1.23	-0.111				0.517	1.73	-2.18	3.9	2.92
		3.44	4.79	1.73	-1.38	0.777	-0.392				0.975	2.78	-1.37	3.68	2.76
		3.32	3.62	3.28	-1.61	0.783	-0.536				1.18	2.62	-1.61	4.06	2.62
		3.26	1.98	1.13	-1.06	0.156	0.111				0.828	3.79	-2.15	4.35	3.16
		3.91	3.13	2.19	-0.765	0.359	-0.229				1.36	2.63	-1.84	4.19	2.86
		3.37	2.84	2.62	-1.09	0.0378	-0.101				1.1	2.88	-1.19	2.52	1.69
		3.33	4.05	3.45	-0.785	0.0638	-0.244				0.865	3.21	-1.57	4.58	1.82
		4.13	2.81	2.55	-1.9	0.574	0.128				0.751	2.63	-0.137	5.16	2.89
		4.08	3.38	3.54	-1.43	0.462	0.0913				0.761	3.37	-0.152	4.39	2.84
		2.19	2.96	0.827	-2.02	0.647	0.0277				0.825	3.26	-0.229	5.32	2.26
		3.29	2.84	1.68	-2.13	0.412	0.218				0.0963	2.82	-0.272	4.48	2.54
		3.24	3.17	1.38	-2.55	0.461	-0.622				0.316	3.12	0.0727	3.67	2.95
		3.4	3.91	0.889	-1.83	0.11	-0.468				0.199	2.96	0.209	2.74	1.7
		2.04	3.1	2.4	-2.39	0.098	0.457				0.335	2.66	1.16	4.69	2.64
		2.47	3.01	2.47	-1.4	0.199	0.67				0.859	1.69	0.0597	3.95	2.05
		2.5	3.07	3.14	-2.47	0.0298	-0.0313				0.813	2.49	0.767	4.37	3.1
		2.4	4	1.63	-2.26	-0.0235	0.62				0.758	2.07	1	4.09	1.72
		2.72	3.56	2.54	-3.09	-0.0437	0.206				0.754	3.46	0.0182	3.5	2.78
		2.96	4.29	2.5	-2.79	-0.239	0.257				0.754	3.21	-0.0348	4.41	0.999
		2.55	4.23	2.07	-2.98	0.129	0.02				-0.0715	2.64	-0.849	3.72	1.11
		2.83	4.33	2.22	-2.61	0.0494	0.159				0.164	4.13	-0.657	3.79	2.16
		1.88	4.24	3.34	-3.17	-0.181	-0.00979				0.507	1.45	-1.91	3.68	2.21
		2.52	3.49	2.64	-2.57	0.11	0.166				0.78	3.28	-1.61	4.02	2.19
		3	2.6	1.84	-1.94	0.259	0.117				0.985	2.58	-1.78	4.3	2.57
		2.66	2.7	1.49	-2.08	0.0964	-0.206				1.38	2.5	-2.35	5.85	1.32
		2.04	3.96	1.4	-1.44	0.235	0.257				1.46	1.67	-1.66	3.57	0.68
		3.52	2.89	1.6	-1.85	-0.196	-0.405				1.81	2.36	-1.07	2.99	0.723
		3.24	3.59	2.31	-1.4	-0.302	-0.18				1.52	2.4	0.684	3.69	1.88
		3.02	2.77	1.26	-1.66	-0.387	-0.0786				0.624	3.38	1.13	5.28	1.98
		3.25	4.13	1.73	-1.43	-0.776	0.645				0.659	3.47	1.14	3.76	0.912
		3.73	2.74	1.1	-1.12	-1.06	0.971				0.427	3.51	1.09	3.6	-0.212
		2.75	2.98	3.07	-1.59	-0.946	0.713				-0.197	2.71	0.365	2.3	1.54
		2.49	4.12	0.985	-2.18	-0.772	0.689				-0.426	4.2	-0.989	3.66	0.647
		2.63	2.45	1.65	-3.1	-0.418	1				-0.164	2.82	-0.927	3.13	1.5
		3.75	3.83	2.99	-2.53	-0.368	0.554				0.203	2.92	-1.22	2.67	1.31
		2.66	4.63	1.65	-2.87	-0.77	0.328				1.26	2.14	-1.42	1.54	1.74
		3.08	3.94	1.1	-2.87	-1.15	0.324				1.48	3	-1.75	2.39	0.152
		3.16	3.17	0.78	-2.29	-0.552	0.074				1.57	3.66	-2.53	3.59	0.198
		3.55	3.52	1.27	-2.55	-0.291	0.388				1.24	3.57	-2.21	3.42	0.443
		3.71	4.64	1.29	-2.28	0.134	0.433				1.01	4.97	-2.66	4.07	-0.781
		3.3	4.28	0.587	-1.77	-0.00763	0.148				0.246	4.59	-2.46	2.67	0.814
		3.33	3.9	1.65	-2.37	-0.168	-0.303				0.418	5.2	-1.67	2.87	-0.767
		3.37	2.97	1.48	-2.03	-0.233	-0.509				0.289	3.83	-2.42	2.18	0.154
		2.53	3.77	2.82	-1.97	0.258	-0.0711				0.473	3.54	-4.07	3.79	-0.0294
		2.22	4.03	0.777	-2.85	0.265	-0.332				0.222	3.08	-3.31	2.84	0.265
		2.97	4.21	2.19	-2.61	0.0876	0.345				0.203	2.17	-3.68	3.58	-0.0608
		2.87	3.4	2.2	-2.52	0.25	0.647				-0.482	2.74	-3.64	2.44	0.665
		3.93	4.74	3.3	-2.44	0.653	0.238				-0.766	2.22	-3.56	3.24	1.17
		3.57	4.97	2.61	-2.97	0.715	0.86				-0.429	2.64	-3.05	3.63	0.0542
		4.18	3.94	0.408	-2.6	0.352	0.26				-1.05	2.17	-3.02	2.55	0.843
		3.69	2.88	1.9	-2.61	0.604	0.301				-1.09	2.56	-1.62	1.19	-0.251
		2.72	5	0.874	-3.32	0.938	0.545				-0.727	1.56	-1.19	2.37	-0.177
		3.55	4.39	1.13	-2.73	1.46	-0.203				-1.16	3.05	-0.982	2.58	1.12
		3.47	3.56	2.51	-2.33	1.08	-0.105				-1.65	3.43	-0.705	3.29	1.68
		4.63	4.28	1.65	-2.7	1.38	-0.163				-1.4	2.95	-0.465	2.16	1.76
		3.65	4.32	1.91	-2.3	1.66	-0.583				-0.632	2.47	-0.228	1.88	1.99
		3.71	3.83	1.46	-1.17	1.71	-0.298				0.114	1.56	-1.01	1.85	1.55
		4.35	4.78	1.45	-1.38	1.73	-0.609				0.278	2.51	0.133	1.51	1.48
		4.58	4.5	1.43	-1.46	1.28	-0.511				0.25	2.68	-0.91	1.95	1.67
		3.94	4.15	1	-1.03	1.46	-0.373				0.501	2.9	-0.103	1.15	-0.287
		3.59	3.19	1.06	-1.24	1.27	-0.261				0.709	3.15	-0.518	1.17	-0.699
		3.2	5.85	2.07	-0.5	1.75	-0.177				0.769	3.14	-0.411	0.937	0.714
		4.08	4.84	2.16	-0.404	1.62	1.03				0.716	3.06	0.315	1.86	0.624
		3.66	5.28	1.36	-0.434	0.837	1.12				1.23	2.89	-0.566	2.39	0.702
		4.68	4.72	0.828	-0.747	0.662	0.573				0.934	1.68	-1.37	3.12	0.334
		4.41	4.46	1.51	-0.684	0.965	0.198				0.944	1.83	-1.36	1.36	0.103
		4.08	2.5	1.57	-0.281	1.74	-0.0602				0.967	1.91	-1.35	2.44	0.0955
		4.32	3.65	1.05	-0.758	1.22	-1.15				0.757	1.78	-1.1	1.71	0.715
		4.8	3.99	2.24	-0.534	1.49	-0.89				0.603	1.39	0.549	0.856	2.39
		4.3	2.83	1.96	-0.196	1.44	-0.656				0.842	2.53	0.733	0.766	1.58
		4.32	3.49	1.51	-0.568	1.34	-0.171				0.736	1.51	-1.3	0.0528	0.828
		4.07	2.43	1.88	0.109	0.91	-0.106				0.994	2.9	-0.763	2.04	1.32
		3.63	2.87	1.89	-0.0884	0.96	0.331				1.34	2.62	-0.709	1.25	-0.785
		3.54	3.09	1.6	-0.0937	0.947	0.742				1.32	2.58	0.0567	2.08	-0.000876
		3.51	3.18	0.728	-0.655	1.15	1.16				0.908	3.26	-2.04	2.36	2.05
		3.17	3.99	1.48	-0.324	1.22	0.837				-0.0356	4.53	-0.323	0.259	1.44
		3.98	4.01	2.6	-0.416	0.567	0.468				-0.0546	3.46	-1.41	-0.625	0.872
		3.47	4.05	2.46	-0.672	0.692	0.931				0.0531	3.71	-1.55	0.31	2.27
		3.23	4.62	1.55	-1.25	0.385	0.915				-0.436	3.19	-0.218	1.21	0.78
		3.86	4.24	0.703	-0.312	0.427	0.985				0.141	2.46	-0.368	0.431	0.844
		3.04	2.82	0.675	-1.22	0.157	1.45				0.0571	2.36	-1.08	1.69	0.528
		3.53	2.16	0.904	-1.49	0.0958	1.5				-0.742	2.12	-1.23	1.21	0.617
		3.12	2.57	1.68	-1.35	0.0511	0.422				-1.1	2.34	-0.538	-0.608	0.0136
		3.5	3.27	0.973	-1.56	0.0206	0.435				-0.687	1.16	-0.353	0.0501	-1
		4.23	3.97	-2.79e-05	-1.05	0.0232	0.159				-0.996	1.52	0.458	0.241	0.0865
		3.4	4.09	0.0346	-1.33	0.121	0.105				-0.996	2.09	0.727	2.35	-0.213
		3.06	4.16	0.53	-0.977	0.795	0.353				-0.588	2.57	0.334	1	-0.573
		4.42	3.71	0.0139	-1.36	0.209	0.608				-0.398	2.32	-0.0709	0.239	0.107
		3.14	2.39	-0.028	-0.631	1	0.474				-0.672	2.26	0.397	1.94	0.695
		3.1	4.03	2.76	-1.04	0.264	0.439				-0.784	3.05	-0.605	2.28	0.363
		3.71	4.8	1.7	-0.697	-0.0021	-0.0877				-1.04	1.73	-0.774	0.708	-1.08
		3.56	4.71	2.55	-1.18	0.158	0.343				-1.23	2.14	-0.478	1.84	0.413
		2.83	4.28	2.13	-1.43	0.852	0.508				-1.56	2.92	-0.595	2.28	1.03
		3.25	2.54	2.58	-1.44	1.05	-0.0665				-1.47	2.14	-1.32	0.468	1.08
		3.3	3.62	-0.0491	-1.52	1.12	-0.488				-1.04	1.94	-1.1	2.75	1.12
		2.54	2.95	-0.735	-2	1.22	-0.527				-0.801	2.16	-1.19	0.262	2.34
		2.64	4.22	-0.454	-1.35	1.2	0.0918				-0.922	1.79	-1.69	-1.02	2.31
		3.01	3.83	0.758	-1.48	0.759	-0.355				-0.865	1.94	-1.5	0.399	2.36
		3.41	3.26	1.47	-1.32	0.22	-0.587				-0.663	2.85	-2.41	0.838	2.82
		3.52	3.94	0.941	-0.67	0.562	0.286				-0.524	2.84	-0.55	-0.359	2.89
		2.15	2.9	1.88	-1.21	1.2	0.156				-0.397	1.44	-1.62	1.26	2.76
		3.54	4.24	-0.365	-1.02	0.84	-0.294				0.354	0.842	-1.56	-1.26	2.1
		2.4	3.14	0.57	-0.806	0.331	0.0155				0.644	1.13	-1.44	0.747	1.43
		2	1.41	2.42	-0.508	0.0275	0.832				0.689	1.55	-1.43	-0.643	0.788
		2.27	4.25	0.13	-0.561	-0.0521	0.764				0.756	1.62	-0.771	0.218	1.26
		2.07	3.94	0.319	-1.15	0.0171	0.469				0.657	1.14	-0.568	-0.983	1.82
		2.92	1.97	1.25	-1.65	0.25	0.512				0.238	1.23	-1.21	1.97	0.667
		3.24	1.75	0.0583	-1.44	0.609	-0.66				0.444	1.29	-1.4	-0.316	0.0128
		1.9	4	0.898	-1.96	0.584	-0.253				0.045	2.26	0.137	0.719	0.451
		3.39	2.19	1.3	-0.637	0.351	-1.2				-0.239	2.08	-0.00456	1.44	0.379
		3.29	3.18	0.419	-2.17	0.191	-0.913				-0.381	2.66	1.81	-0.188	0.181
		3.05	3.05	-1.21	-2.86	-0.18	-0.283				-0.574	2.07	0.987	1.17	0.413
		2.93	3.4	0.276	-2.18	-0.273	1.32				-0.685	2.58	1.88	1.52	0.391
		3.12	1.71	-0.185	-2.15	-0.262	1.08				-1.16	1.47	1.33	2.43	-1.06
		2.99	3.32	1.03	-2.34	0.115	1.19				-1.84	1.64	0.867	1.11	1.21
		2.2	1.84	0.995	-1.68	-0.0396	1.17				-1.94	0.63	0.918	0.0622	1.79
		3.21	2.83	0.138	-2.34	0.39	0.287				-1.34	0.787	1.21	0.918	1.53
		1.74	2.39	0.684	-1.68	0.743	-0.503				-1.41	-0.0174	2.42	2.08	2.09
		2.12	2	1.47	-2.2	0.66	-0.442				-1.52	-0.172	2.42	2.63	1.51
		2.49	1.92	0.786	-1.5	0.664	-0.315				-1.08	0.944	2.16	1.17	1.8
		1.79	2.67	2.37	-1.3	0.124	0.00511				-0.638	0.251	1.85	2.2	2
		2.42	2.88	1.85	-2	0.531	-0.315				-0.237	0.968	0.394	1.53	2.87
		2.66	3.7	2.1	-2.04	0.516	0.107				-0.45	0.466	0.243	1.21	2.53
		2.86	3.11	1.68	-2.5	0.881	-0.597				-0.75	1.94	-0.561	1.13	2.21
		2.39	0.479	1.49	-2.44	1.53	-1.55				-0.34	2.11	-0.0599	1.86	2.46
		3.05	2.66	0.331	-1.72	1.13	-1.13				-0.16	3.08	0.52	0.699	1.58
		2.78	2.5	2.58	-1.08	0.976	-0.696				-0.517	2.22	1.42	2.18	2.66
		2.3	3.78	1.53	-2.01	0.63	0.525				-0.928	2.54	1.11	2.02	1.86
		2.08	3.93	1.98	-2.03	0.864	-0.093				-0.36	2.44	2.34	3.15	1.51
		3.03	4.09	2.26	-1.34	1.41	1.09				-0.399	2.83	2.09	3.81	1.74
		2.63	4.76	2.42	-2	1.11	1				-0.0603	1.87	2.86	3.13	1.95
		2.48	3.81	3.87	-1.89	1.09	0.632				-0.201	2.54	1.63	1.43	-0.211
		1.98	3.58	2.4	-2.17	0.199	0.907				-0.591	2.37	0.567	2.59	-0.311
		3.43	2.86	3.12	-2.54	0.534	0.187				-0.886	0.619	0.709	1.84	-0.469
		2.33	3.27	1.74	-1.91	1.19	0.261				-0.973	1.18	-0.128	3.38	-0.0799
		2.36	2.9	2.54	-2.56	2.13	-0.626				-0.508	1.45	-0.683	2.67	-0.53
		1.97	3.15	2.81	-1.88	2.32	-0.172				-0.532	1.66	-0.954	2	1.55
		1.7	4.95	3.15	-2.44	1.81	-0.583				-0.354	1.68	-0.733	-1.18	2.11
		1.96	5.64	3.03	-2.5	0.485	-0.197				-1.27	1.28	-0.355	-0.558	0.896
		2.15	5.15	1.67	-2.15	0.588	-0.485				-1.43	1.39	-0.814	1.57	2.16
		1.9	5.33	2.49	-1.59	0.729	-0.275				-1.25	0.91	-0.668	2.13	1.15
		2.56	3.78	3.98	-2.21	1.08	-0.413				-1.7	0.566	-0.581	0.407	0.759
		2.92	4.48	2.56	-1.78	1.1	-0.856				-1.31	0.319	-0.291	-0.263	1.72
		2.32	5.01	1.65	-1.56	1.4	-0.818				-1.28	1.61	0.605	0.923	1.18
		2.13	3.92	1.92	-2.2	1.73	-0.846				-1.23	1.83	1.08	-0.00864	-0.0938
		3.22	2.82	4.06	-2.18	1.47	-0.749				-1.52	1.33	0.242	1.36	0.0535
		2.11	0.807	2.22	-1.25	1.2	-0.865				-0.627	0.768	0.132	-0.239	0.71
		2.64	1.89	2.92	-2.24	0.782	-1.56				-0.407	2.18	-0.0517	0.638	1.54
		2.41	1.91	2.87	-0.812	0.618	-0.845				0.357	1.51	0.636	-0.107	1.35
		1.64	3.74	0.243	-1.75	1.22	-0.711				0.924	1.54	-0.272	-0.148	0.72
		1.94	2.47	0.617	-2.14	1.37	-0.0945				0.845	1.16	-1.09	-0.169	2.34
		2.35	2.3	0.813	-2.64	1.38	0.437				0.641	0.286	0.28	0.346	2.37
		3.06	1.26	1.27	-2.57	1.4	0.503				0.114	1.38	0.092	1.36	2.48
		3.01	1.92	2.21	-1.62	1.15	-0.0878				0.219	0.567	0.317	0.882	1.77
		1.64	1.61	2.53	-2.42	1.75	-0.261				0.00464	1.79	0.301	0.346	2.36
		3.18	1.99	3.42	-2.17	1.29	0.0202				-0.00275	1.85	0.0854	-0.47	2.24
		2.87	1.76	1.03	-1.86	1.57	0.297				0.048	1.74	0.597	1.16	1.61
		3.84	1.67	1.9	-1.45	1.36	0.898				-0.136	2.71	0.0305	-1.29	3.84
		3.8	0.97	2.61	-0.768	1.04	0.856				-0.988	2.46	-1.12	-0.122	3.91
		4.07	0.684	3.12	-1.57	1.01	0.111				-1.18	1.19	-1.14	-1.22	3.99
		2.85	2.17	3.58	-0.0683	0.561	-0.923				-0.99	0.787	-0.901	0.373	4.18
		3.4	1.77	2.69	-1.33	0.565	0.265				-0.958	1.74	-0.823	-1.01	3.71
		3.27	1.35	2.08	-0.796	0.0683	0.836				-0.885	1.29	-0.851	-0.226	2.78
		4.59	1.18	1.71	-0.364	-0.171	0.000339				-0.138	-0.412	-0.183	-0.322	2.63
		2.87	1.58	2.09	-1.5	0.348	0.665				0.198	0.281	1.76	-0.95	3.2
		3.24	3.31	1.24	-1	0.33	2.5				-0.0295	0.777	0.786	-0.386	3.56
		2.32	1.92	2.27	-1.46	0.206	1.64				-0.209	0.9	0.353	0.465	4.08
		0.842	1.8	1.97	-1.45	0.119	0.111				1.18	1.26	-0.103	0.458	2.42
		1.15	1.22	0.783	-0.561	0.146	0.314				1.84	1.17	-0.334	0.116	2.32
		1.68	0.907	0.966	-0.619	-0.0529	1.81				1.72	0.148	-0.735	-1.33	1.13
		1.94	1.74	0.117	-1.47	0.0952	0.917				1.76	0.644	-0.408	-0.734	1.01
		1.39	2.19	1.66	-1.08	-0.0878	0.689				2.24	2.1	-0.754	-0.144	2.3
		1.38	3.44	1.35	-1.93	-0.144	-0.35				1.35	1.54	-1.03	0.446	1.99
		1.19	2.95	-0.392	-1.53	-0.332	0.194				0.845	1.06	0.263	2.02	0.994
		0.385	1.78	2.03	-1.42	-0.353	-0.346				0.725	0.617	1.52	1	-0.246
		1.42	0.457	2.32	-1.72	-0.162	-0.604				1	1.82	0.579	1.08	0.0996
		2.07	1.36	0.859	-1.86	-0.373	-0.253				0.89	2.34	1.31	1.27	-0.0243
		2.42	1.56	-0.72	-2.15	-0.641	0.172				0.917	1.38	0.244	1.95	0.938
		1.85	1.97	0.106	-2.16	-0.343	0.494				1.01	0.804	0.513	-0.456	1.64
		2.3	1.03	1.39	-1.96	-0.777	0.524				1	0.523	-0.0559	2.36	0.707
		1.83	1.72	0.154	-2.19	-0.64	-0.0713				1.37	0.455	0.547	3.59	0.249
		1.5	0.312	2.35	-1.53	-0.689	0.123				2.04	0.144	0.0227	1.34	1.11
		1.91	0.757	1.31	-2.44	-0.74	0.49				2.43	0.997	-0.414	0.654	1.12
		1.9	2.31	1.18	-2.47	-0.218	0.987				1.95	0.974	-0.423	-0.00509	0.741
		1.63	2.91	1.72	-2.73	-0.48	0.0853				2.08	1.13	-0.592	1.37	1.71
		1.99	2.71	0.601	-2.81	-0.245	0.175				1.97	0.902	-0.0423	2.25	1.71
		2.25	1.44	1.74	-2.4	-0.139	0.369				1.89	1.14	1.1	1.45	1.21
		2.32	2.66	1.7	-2.43	-0.0586	1.01				1.53	0.938	1.68	1.35	0.157
		1.3	1.87	2.21	-2.34	-0.547	2.17				2.03	1.07	1.2	1.29	-0.105
		1.59	4.1	1.39	-2.06	-0.963	0.983				1.28	0.898	1.41	1.26	0.925
		2.04	1.78	1.57	-2.25	-0.591	0.151				1.06	0.96	0.443	-0.0223	0.46
		1.92	1.95	0.297	-2.03	-1.18	0.396				0.0134	0.654	1.76	-0.523	1.62
		2.38	0.854	0.47	-2.12	-0.99	0.969				-0.155	0.255	1.49	1.32	1.2
		2.8	1.37	1.68	-2.32	-1.11	1.7				0.275	0.0959	0.522	0.81	2.26
		2.08	2.03	0.326	-1.79	-1.24	0.507				0.19	1.22	0.679	2.51	3.02
		1.83	1.36	-1.17	-2.04	-1.6	-0.18				0.438	0.226	1.38	1.36	1.56
		3.02	0.762	-1.58	-1.71	-1.05	-0.715				1	0.858	0.552	-0.128	0.878
		2.39	0.169	-1.06	-0.947	-1.06	-0.0761				0.721	3.28	-0.0188	-0.135	1.06
		2.74	0.138	-1.44	-1	-0.565	-0.606				0.994	1.99	-0.105	2.72	-0.123
		3.21	2.32	0.391	-1.19	-0.817	-1.19				1.7	4.04	-0.0105	1.56	0.199
		2.62	1.48	0.405	-1.08	-1	-0.64				1.43	2.9	0.628	0.866	0.797
		3.92	1.14	0.326	-1.54	-0.653	-1.21				1.27	2.03	0.936	2.05	1.19
		2.89	0.936	-0.213	-0.943	-0.484	-0.892				1.31	1.64	1.09	0.59	1.61
		3.58	1.5	0.953	-1.45	0.186	-0.282				0.731	2.57	0.574	1.22	0.404
		2.94	1.52	0.254	-2.41	-0.346	-0.361				0.56	2.41	1.47	-0.32	-0.188
		2.8	1.35	0.325	-0.525	-0.397	-0.673				0.458	1.73	0.848	-0.48	-0.222
		2.68	0.782	0.504	-1.09	0.0492	-0.61				-0.0543	0.472	1.31	0.228	-0.126
		1.22	1.83	-0.0752	-1.63	-0.504	-0.64				0.065	0.392	0.655	1.04	0.473
		0.328	1.38	1.51	-2.33	-0.294	-0.885				0.0988	1.11	1.28	1.21	0.322
		1.73	1.27	-0.895	-1.64	-0.203	-0.697				-0.424	1.83	1.07	1.46	-0.0651
		2.07	1	0.572	-1.2	-0.774	-0.555				-0.188	2.97	2.44	-0.0797	0.448
		1.96	1.19	1.12	-2.07	-0.743	-0.765				0.0306	2.8	3.23	0.605	0.465
		2.12	0.186	1.96	-1.91	-0.719	-1.43				-0.31	3.2	2.28	1.83	1.5
		2.16	1.21	0.518	-1.31	-0.348	-1.36				-0.437	2.02	2.66	0.993	1.09
		2.81	0.826	0.447	-1.49	-0.271	-0.646				-0.661	1.78	1.26	2.39	1.27
		1.71	0.382	1.84	-1.23	-0.211	-0.529				-0.4	1.01	2.17	2.52	2.05
		1.86	2.03	0.604	-1.46	-0.502	-0.747				-0.604	1.7	0.921	1.52	1.92
		2.24	2.18	0.48	-0.817	-0.251	-0.628				-0.248	1.59	0.87	0.221	0.186
		2.89	1.01	-0.515	-1.18	-0.271	-0.699				-0.224	1.09	0.9	-0.445	0.987
		1.56	1.97	0.573	-0.748	-0.289	-1.35				-0.283	2.02	0.215	1.17	0.104
		1.54	-0.181	-0.0745	-0.568	-0.221	-0.073				-0.543	1.29	-0.304	0.0451	0.788
		1.1	-0.55	1.13	-0.223	-0.287	-0.0343				-0.169	1.78	-0.617	1.09	1.14
		2.15	-0.0309	0.436	-1.06	-0.647	0.769				-0.0916	2.18	0.383	0.218	0.627
		2.2	1.46	0.865	-1.25	-0.545	0.609				-0.0694	2.1	-0.053	0.336	1.14
		0.98	1.17	-1.49	-1.02	-0.805	0.731				-0.429	2.18	-0.458	-1.3	0.899
		1.49	0.489	-0.0491	-1.24	-0.841	1.86				-1.04	2.67	-0.239	-1.26	1.23
		0.679	0.353	-0.972	-1.54	-0.679	1.29				-0.914	2.25	0.154	-0.277	1.51
		0.886	1.68	-0.353	-0.467	-0.982	1.79				-0.583	1.95	0.141	-0.305	1.22
		1.26	0.103	0.423	-1.77	-0.574	2.06				-0.114	2.3	0.799	-0.657	1.01
		1.05	0.845	1.59	-1.49	-0.947	2.08				0.00339	3.57	0.137	0.748	0.468
		1.56	1.32	0.482	-1.42	-0.769	2.05				-0.0136	3.13	0.137	-2.15	2.33
		1.84	1.85	1.12	-1.32	-0.29	2.07				-0.188	3.27	2.11	-0.878	1.91
		1.55	0.308	0.292	-1.55	0.103	2.31				-0.312	2.87	1.63	-0.355	1.24
		1.59	0.681	0.515	-1.67	0.206	2.83				0.329	2.18	0.0293	0.0131	1.46
		1.43	0.483	-0.245	-0.765	1.34	2.6				-0.0571	2.82	0.429	-0.382	0.501
		1.33	0.296	0.705	-0.118	1.75	2.12				0.0887	1.86	1.86	1.4	1.31
		2.13	0.473	0.909	0.375	1.65	1.93				0.278	2.31	1.72	-0.283	1.73
		1.94	0.761	2.17	-0.213	1.33	2.27				0.718	3.35	0.83	1.15	2.63
		1.39	2.2	2.77	0.506	1.23	1.97				0.49	3.4	0.111	-0.805	2.57
		1.91	0.618	1.78	-0.0926	0.496	1.95				-0.0626	2.86	0.247	0.198	2.7
		2.06	1.22	1.77	-1.12	0.379	2.18				0.389	4.05	0.0261	-0.397	2.99
		1.28	-0.0165	0.0424	-0.587	0.356	1.41				0.441	2.88	-0.576	-1.18	2.34
		0.977	0.949	1.42	-1.13	0.981	1.81				0.764	2.08	0.387	0.226	1.97
		1.27	0.771	1.02	-1.25	0.532	1.06				0.681	2.42	2.02	1.21	2.67
		2.3	1.55	-0.025	-0.898	0.703	0.193				1.04	1.67	1.35	0.0851	2.45
		0.515	1.77	-0.414	-1.73	0.677	0.161				1.13	3.66	1.01	-0.355	1.96
		0.591	3.27	-1.07	-1.87	0.821	-0.0328				0.761	3.19	1.55	0.153	1.04
		1.59	1.59	-1.01	-2.39	1.37	0.989				0.573	3.16	0.0276	0.0443	1.84
		1.99	3.34	-0.339	-0.954	1.19	0.0581				0.461	3.5	0.136	-1.54	1.95
		1.21	1.52	0.549	-1.92	1.03	-0.484				0.477	2.73	1.34	-0.977	1.35
		-0.564	3.23	0.717	-1.18	1.31	-0.335				0.311	2.44	0.751	0.743	1.42
		0.712	4.15	2.12	-2.03	0.979	-0.536				-0.734	3.69	1.39	0.197	1.02
		1.97	3.33	0.374	-0.391	0.738	-0.14				-0.43	1.8	0.0204	0.497	0.423
		1.97	2.5	1.35	-0.0475	0.966	0.0707				-0.945	1.27	0.949	0.026	0.643
		1.38	3.04	0.878	0.17	1.65	0.441				-0.846	2.21	1.48	0.399	0.503
		0.517	3.5	0.151	-0.595	1.69	0.708				-1.19	1.89	0.865	-0.842	0.412
		0.347	2.93	1.07	-0.742	1.61	0.775				-0.951	0.947	0.938	1.93	-0.18
		0.806	2.95	-0.336	-1.1	1.07	0.443				0.0405	0.547	0.19	1.6	-0.959
		0.654	2.97	0.851	-1.18	1.14	0.939				-0.468	2.64	-0.0891	0.783	-0.175
		2.11	3.14	-0.156	-1.25	0.808	0.189				0.184	1.24	-0.0829	2.19	-0.539
		1.44	2.37	0.514	-1.86	1.13	-0.298				0.463	1.3	0.248	-0.294	-0.605
		1.17	2.82	0.705	-1.78	1.36	-0.1				0.119	-0.306	0.417	-1.32	0.426
		1.41	0.468	1.05	-1.24	0.915	0.334				0.0305	1.28	-1.55	-0.402	1.01
		1.64	-0.909	-0.308	-1.77	0.889	0.537				-0.468	0.283	-1.21	1.3	0.729
		1.25	1.51	0.422	-1.8	1.1	-0.454				-0.94	1.28	-1.34	0.619	0.916
		0.81	0.879	-0.173	-2.24	1.61	-0.724				-1.25	1.13	0.504	1.22	-0.937
		0.385	-0.0497	1.27	-1.86	1.45	-0.158				-1.29	1.05	0.115	-1.29	0.00522
		0.103	0.985	1.15	-1.46	1.55	-0.82				-1.15	0.359	-0.28	-1.46	0.18
		1.02	1.13	-0.167	-1.43	1.89	-0.751				-1.32	0.105	-0.996	0.879	0.111
		2.63	2.43	0.801	-1.22	1.72	-0.445				-1.19	1.73	-0.674	-0.0627	1.17
		2.23	0.753	2.77	-1.25	1.68	-0.228				-1.07	0.806	-1.59	0.514	-0.218
		0.122	1.36	0.92	-0.772	1.82	-0.255				-1.1	0.306	-0.269	-1.01	0.434
		0.681	0.296	1.06	-1.38	1.63	0.507				-1.04	0.489	0.302	-2.47	0.0668
		0.492	0.617	2.05	-1.18	0.899	1.62				-0.647	0.402	0.613	-2.83	1.07
		0.569	1.44	1.05	-1.94	1.02	1.19				-0.581	0.573	-0.301	-0.905	0.791
		1.26	2.38	0.127	-1.57	1.6	0.93				-0.737	0.659	-0.751	0.443	1.45
		1.46	0.134	1.01	-1.67	1.48	1.18				-0.688	1.39	-0.286	-2.04	1.8
		1.38	1.98	1.11	-2.32	1.43	0.165				-0.269	0.955	-0.595	0.655	1.67
		0.0448	1.87	1.56	-2.14	1.36	-0.297				0.212	1.88	-0.149	-0.41	0.148
		0.186	0.803	2.89	-1.2	1.15	-0.447				0.265	-0.455	0.0557	-0.161	0.499
		0.551	0.713	3.1	-1.76	0.536	-0.343				0.488	-0.387	-0.0131	-1.15	-0.718
		1.86	1.1	0.876	-1.21	0.719	-0.528				0.708	-0.422	0.034	-0.0594	0.456
		2.77	-0.264	0.515	-1.47	0.292	0.0928				0.364	0.198	0.133	0.228	1.61
		2.87	0.813	1.26	-1.88	0.691	0.189				0.356	-0.225	-1.16	-1.1	1.52
		1.7	0.554	1.53	-1.66	0.099	0.532				0.031	0.957	-0.693	-1.25	1.49
		3.14	-0.0602	1.14	-2.17	-0.404	0.383				-0.967	0.543	-0.283	0.847	2.57
		3.86	-0.43	0.0189	-1.81	-0.648	0.547				-0.505	0.432	0.709	0.0288	1.69
		3.47	-0.863	1.32	-1.88	-0.463	0.464				-0.21	1.53	0.848	-1.18	1.1
		3.72	-0.302	0.488	-2.07	-0.00171	0.217				-0.585	1.05	1.74	-0.248	1.9
		1.43	0.594	1.29	-1.64	0.17	-0.805				-0.389	1.52	0.0264	1.37	2.39
		2.25	1.2	2.02	-1.42	-0.017	-0.172				-0.478	2.14	0.0701	0.256	2.47
		2.63	1.01	0.532	-1.41	-0.0637	0.186				-0.122	0.872	-0.784	0.149	1.58
		2.92	0.139	0.216	-1.3	-0.44	1.29				-0.308	0.62	-0.762	0.509	-1.07
		2.36	-0.438	1.46	-2.4	-0.9	1.31				0.488	2.17	1.2	-0.552	-1.12
		2.44	0.717	1.45	-2.25	-0.448	1.14				0.643	1.98	1.32	-1.07	0.447
		2.15	1.96	2.42	-1.86	-0.188	0.404				0.641	0.954	0.418	-0.742	-1.38
		2.71	2.73	2.13	-2.75	-0.104	0.425				0.767	0.931	-0.135	-1.69	-0.798
		2.01	1.85	1.36	-2.49	0.58	0.182				0.338	0.92	-0.458	-0.569	-0.543
		2.56	2.54	1.91	-2.18	0.544	0.27				0.254	0.673	0.21	1.15	0.469
		2.2	1.04	2.25	-1.46	-0.273	0.492				0.336	2.86	0.824	0.975	1.09
		3.47	0.14	1.21	-0.52	-0.215	0.0586				0.0583	2.02	1.85	-0.78	0.783
		2.46	1.3	-0.0201	-0.965	-0.469	-0.069				0.297	2.85	1.57	-0.267	1.55
		2.56	1.26	0.651	-2.12	-0.0966	0.188				0.358	3.9	1.39	-0.747	1.65
		2.7	0.632	1.11	-1.24	-0.425	-0.973				0.673	5.49	1.64	0.0765	1.51
		2.91	0.145	-0.792	-0.943	-0.96	-0.484				0.991	4.92	0.626	0.147	1.3
		3.18	1.1	0.368	-0.969	-0.533	-0.0453				0.998	4.11	0.76	0.135	2.06
		3.27	1.29	1.35	-1.56	-0.063	0.375				0.575	3.75	-0.167	-0.0154	1.87
		2.39	1.46	1.24	-2.11	-0.322	-0.427				0.728	3.03	0.00331	0.0635	2.36
		2	1.01	1.72	-1.36	-0.406	-0.0572				0.813	3.56	0.106	-0.27	1.56
		1.91	1.54	0.18	-0.976	-0.248	-0.181				0.567	3.3	-0.168	0.0984	2.56
		2.78	-0.404	1.86	-0.924	0.352	0.00754				0.463	2.95	0.086	-1.27	3.37
		2.3	-0.448	0.575	-0.211	-0.626	0.0472				0.787	3.54	-0.668	-2.49	2.66
		2.26	0.451	0.586	-0.324	-0.232	-0.145				0.894	2.28	-1.24	-0.766	3.81
		2.39	1.06	0.813	-0.674	-0.119	0.0913				1.79	3.33	-1.73	-0.0439	3.22
		2.13	1.5	1.44	-0.608	0.375	-1.04				2.13	2.07	-1.34	-0.993	1.16
		2.76	1.57	1.13	0.028	0.414	-0.486				2.38	1.6	-0.644	-1.3	3.39
		1.97	0.119	1.17	-0.82	0.425	-0.322				2.41	1.55	-0.216	-4.26	3.26
		1.14	0.408	2.54	-1.25	0.366	-0.736				1.99	1.86	0.249	0.181	1.71
		1.12	0.222	1.39	-1.32	-0.535	-1.02				1.87	1.59	-0.809	0.236	2.02
		1.13	0.0915	1.09	-1.49	-0.782	-1.41				1.41	2.24	-0.485	-0.204	3.66
		1.64	0.367	2.17	-1.4	-0.652	-0.834				1.7	2.69	-1.06	0.151	3.81
		2.51	0.513	1.93	-1.68	-0.408	-1.67				1.32	3.18	-0.777	-0.902	4.53
		3.46	-0.639	0.933	-1.98	-0.282	-1.9				1.11	1.59	0.0085	-1.81	3.84
		2.12	-0.594	1.8	-0.908	-0.159	-1.31				0.646	2.41	0.876	-1.23	4.36
		2.28	0.819	1.35	-1.48	0.412	-0.509				-0.0674	1.34	-0.292	-0.569	2.08
		2.15	0.583	0.126	-1.58	0.365	-0.00315				-0.46	1.97	0.0332	-1.73	3.63
		2.06	1.48	2.02	-2.44	-0.106	-0.144				-0.213	1.04	0.538	-1.88	3.68
		2.52	0.0663	0.295	-1.88	-0.109	-0.254				-0.0735	1.37	-0.541	-0.197	1.57
		2.5	-0.836	0.835	-1.42	0.686	-1.03				-0.448	2.16	-1.06	-1.84	3.23
		2.93	0.851	0.847	-1.33	0.689	-0.17				-0.674	2.64	-0.591	-1.22	3.42
		2.17	-0.0331	0.279	0.0201	0.876	0.343				-1.08	2.91	-1.42	0.226	2.81
		2.34	0.0398	2.31	-1.1	0.622	0.549				-0.731	2.53	-1.52	0.0554	1.81
		0.964	0.083	0.661	-1.6	-0.173	0.237				-1.12	1	-0.869	0.105	2.27
		2.02	-0.00646	1.12	-1.63	0.0277	0.659				-1	0.851	-1.17	-0.59	1.58
		1.64	-0.496	1.53	-2.31	-0.405	-0.17				-0.835	1.68	-1.52	0.28	1.58
		1.89	-0.141	0.413	-0.833	-0.122	-0.409				-0.83	0.965	-2.1	-2.07	1.73
		2.26	-1.62	0.344	-1.09	-0.157	-0.69				-0.341	0.687	-0.449	-0.808	2.34
		1.19	-0.552	-0.802	-1.02	-0.316	0.742				0.323	1.19	-1.33	-1.56	2.43
		1.08	0.0262	-1.06	-1.46	0.223	0.273				0.435	1.75	-2.6	-0.254	1.94
		2.33	-0.686	0.397	-1.17	-0.72	-0.791				0.48	0.579	-2.05	-1.77	2.15
		1.4	0.369	0.804	-1.77	-0.29	-0.57				0.474	1.15	-1.14	-0.699	1.87
		0.247	0.521	-1.07	-2.1	-0.425	-0.62				0.172	1.11	-0.526	-0.0225	1.73
		0.0808	1.42	1.19	-1.99	0.0874	-0.863				0.363	1.73	-1.67	-1.81	0.849
		0.984	0.826	1.34	-2.44	-0.113	-0.844				0.168	2.3	-2.01	-0.72	0.885
		-0.126	-0.189	0.204	-2.22	-0.113	-0.794				-0.222	1.52	-0.766	-3.16	1.36
		0.879	-1.63	0.439	-1.8	-0.404	-0.607				-0.309	1.45	-0.788	-1.96	1.7
		0.947	-0.422	-0.396	-1.07	-0.87	0.11				-0.484	1.15	-0.877	-1.48	0.896
		0.654	0.737	-0.87	-1.03	-0.632	-0.405				-0.718	3.23	-0.107	-0.255	0.966
		-0.281	0.338	-0.395	-0.754	-0.776	-0.0794				-0.68	3.24	-0.659	-0.084	0.106
		0.146	0.823	0.541	-0.394	-0.953	-0.277				-0.623	2.21	-0.397	0.241	1.05
		0.982	-0.453	0.671	-0.655	-0.973	0.283				-0.806	3.3	-0.337	-2.32	1.35
		1.51	0.251	-0.431	-1.59	-0.843	-0.0542				-0.0645	3.36	-0.661	-2.26	1.23
		1.54	0.619	-0.509	-1.32	-1.3	0.0246				0.094	1.4	-0.209	-2.02	2.38
		0.917	0.912	-0.203	-1.6	-1.15	0.0512				-0.0953	1.24	-0.000996	-0.944	-0.185
		0.832	1.44	-0.263	-2.08	-1.23	-0.235				0.616	1.49	-0.133	-1.59	0.468
		0.137	1.65	0.365	-1.32	-1.32	-0.294				0.781	1.31	-0.836	-0.414	0.208
		-1.23	0.998	-1.46	-1.22	-1.53	-0.588				0.356	-0.9	-0.945	-0.875	0.852
		-0.457	0.608	0.253	-1.12	-1.65	-1.04				0.822	-0.274	-0.996	-1.82	0.945
		-0.0807	1.22	-0.532	-1.08	-0.8	-0.614				1.58	-0.798	-2.09	-1.67	1.13
		0.945	0.158	-1.16	-1.69	-0.719	-1.01				1.58	-1.22	-0.323	-2.09	2.8
		-0.19	-0.512	0.569	-1.87	0.302	-0.485				1.95	0.136	-0.751	-1.25	2.14
		0.00322	0.42	0.622	-2.25	0.916	-0.241				2.07	1.21	-0.189	-0.591	2.45
		-0.171	-0.149	0.482	-1.97	0.239	-1.11				1.98	1.13	0.0541	0.913	1.95
		-0.425	0.268	0.816	-1.58	0.328	-0.297				2.39	2.11	-0.326	-0.0857	2.8
		-0.94	0.508	0.188	-2.42	0.295	-0.139				2.11	1.25	0.0694	-1.68	1.74
		-0.809	0.195	0.945	-1.84	1.13	-0.214				1.94	2.36	0.267	-1.52	1.74
		0.854	0.529	0.273	-2.04	1.03	-0.255				1.65	3.17	0.0374	-1.52	1.55
		0.19	0.6	0.627	-1.79	0.815	-0.745				1.7	2.07	0.154	-0.815	2.09
		1.01	0.181	0.257	-2.51	1.08	-0.979				2.23	1.63	0.358	-0.849	1.53
		0.00707	-0.463	0.162	-2.18	1.39	-1.05				3.89	2	1.21	-0.391	2.07
		-0.383	1.04	-0.729	-1.56	1.43	-2.09				2.85	2.12	1.59	-0.936	1.9
		-0.281	0.228	-1.42	-0.967	0.835	-1.58				2.23	2.46	1.13	-3.45	2.12
		0.399	0.127	0.453	-1.29	1.56	-1.38				1.11	1.24	1.04	-2.81	1.03
		0.0705	-0.66	-0.00263	-1.11	1.43	-1.73				0.724	0.843	-0.204	-1.34	0.0284
		0.333	-0.63	1.53	-1.52	1.19	-1.33				1.24	-0.291	0.412	-0.276	1.71
		0.93	-1.13	1.32	-2.3	1.03	-0.92				1.27	-0.44	0.845	-1.12	0.0649
		0.704	-0.58	0.785	-1.74	1.02	-1.41				0.842	-0.133	0.0469	-0.877	-0.252
		1.34	-1.64	1.5	-1.89	0.549	-1.41				0.768	0.883	0.495	0.27	0.637
		0.84	0.0875	1.44	-1.32	-0.0208	-1.13				1.2	-0.0523	1.14	0.308	0.672
		0.467	-1.38	0.564	-2.37	-0.5	-0.278				1.02	0.485	0.504	0.174	1.99
		0.932	0.0441	0.266	-1.36	-0.822	0.86				1.21	0.773	-0.289	-0.357	2.22
		0.333	-0.3	1.57	-1.97	-0.9	0.447				1.85	0.0623	-0.0115	1.48	2.26
		0.624	0.524	1.66	-1.95	-1.07	-0.445				2.08	-0.101	0.732	-0.143	1.69
		1.1	-0.415	0.381	-1.83	-0.557	-0.517				1.64	0.0634	0.155	0.778	1.17
		0.258	0.679	1.47	-0.763	-0.863	-0.64				2.51	0.347	0.137	-0.411	0.445
		0.613	0.04	1.99	-1.38	-0.695	-0.276				2.76	0.377	0.619	0.52	0.572
		1.01	-0.484	0.866	-2.54	-0.462	0.279				2.58	-1.07	0.613	0.75	0.26
		1.03	-0.0966	1.75	-1.32	-0.951	0.2				3	-1.34	0.0932	0.0256	1.37
		0.518	-0.689	1.35	-1.54	-1.32	0.774				2.79	-0.958	-0.254	0.252	2.01
		0.872	-1.29	1.57	-2	-1.03	0.396				2.35	-0.26	-0.0571	-0.871	1.31
		1.51	1.22	1.11	-1.87	-0.967	0.653				2.03	-0.625	0.874	-0.835	2.41
		1.06	0.321	1.37	-1.91	-1.07	0.00505				2.09	0.553	0.317	-0.967	0.983
		0.352	-1.72	1.18	-1.64	-1.14	0.711				1.91	1.25	1.5	0.863	1.27
		1.15	-0.586	1.34	-1.37	-0.683	1.02				1.8	0.695	0.293	0.192	1.06
		1.19	-0.484	0.158	-1.96	-1.19	0.946				1.93	0.506	-0.219	0.308	-0.00246
		0.835	-0.414	0.652	-2.12	-1.18	0.461				1.43	0.00477	-0.665	-0.153	-0.332
		1.88	-1.05	1.63	-1.82	-0.855	1.64				1.52	0.696	-0.577	0.167	0.124
		1.65	-0.108	0.796	-2.03	-0.888	1.82				1.5	0.604	1.06	-0.708	-0.285
		2.82	-0.317	0.596	-1.66	-1.07	1.26				0.968	1.04	0.194	-0.835	-0.582
		1.34	-1.13	2.56	-1.53	-1.51	1.04				0.542	0.769	0.816	-0.604	-0.838
		0.971	-0.679	2.02	-1.18	-1.52	0.732				0.0402	1.06	-0.411	0.892	-1.27
		0.497	-0.834	-0.372	-1.35	-1.17	1.9				0.0713	0.387	-0.369	0.983	-1.41
		0.999	-1.29	1.74	-1.77	-1.44	1.92				-0.353	0.464	0.0373	-0.0974	-2.82
		0.511	-0.35	0.772	-1.63	-0.582	1.04				-0.35	1.57	-0.22	0.683	-1
		1.93	0.599	1.19	-0.734	-0.464	1.01				0.362	1.85	-0.263	-0.199	-0.485
		2.1	0.403	1.03	-1.65	-0.571	1.09				0.346	1.54	-0.692	-1.3	-0.979
		1.78	0.0999	1.4	-1.22	-0.577	0.876				-0.172	2.04	-0.907	-0.884	-0.645
		0.865	0.524	2.51	-1.75	-1.34	0.933				0.569	0.894	-0.0532	-2.24	-1.58
		1.37	-0.453	2.19	-0.961	-1.05	0.291				0.987	1.44	-0.363	0.437	-1.14
		1.63	-0.16	-0.512	-1.98	-1.31	1.01				1.04	1.07	-0.0401	-0.804	-1.31
		2.59	-0.766	-0.729	-1.1	-1.07	0.635				1.56	-0.752	-0.579	-1.24	-2.35
		1.81	-0.492	0.462	-0.694	-0.608	0.717				0.988	-1.97	-0.108	-1.07	-1.67
		1.51	-0.144	-0.553	-2.17	-0.0535	0.704				0.479	0.19	-0.519	-1.87	-0.909
		0.982	0.38	0.398	-3.17	-0.156	1.19				0.0974	0.473	-0.364	-1.14	-1.06
		0.852	0.379	-2.07	-2.34	-0.26	1.33				0.821	1.47	0.961	0.972	-0.155
		1.25	0.868	-1.14	-2.41	0.235	1.61				1.28	0.518	0.722	-0.361	-0.165
		1.37	0.263	-1.28	-1.68	1.56	1.66				1.02	2.26	0.872	-0.231	0.0888
		1.18	-0.581	0.0559	-2.11	1.71	1.57				1.46	1.47	0.25	-0.267	0.635
		1.2	-0.636	-0.0701	-2.56	1.51	1.22				1.77	-0.551	0.4	-2	-0.0536
		0.775	0.263	-1.9	-2.81	1.51	1.55				1.98	-1.73	0.2	-2.65	-0.293
		0.197	0.732	0.0904	-2.45	1.41	1.47				3.15	0.551	0.542	-1.26	0.356
		0.903	1.88	-0.923	-2.19	0.936	1.26				3.07	1.38	-0.184	-1.89	0.989
		1.46	0.544	-0.528	-1.96	0.926	0.965				3.22	2.39	-0.785	1.5	-1.09
		0.727	0.447	0.437	-2.14	0.496	1.11				2.48	2.45	0.0148	-0.582	-0.382
		1.31	0.398	1.17	-1.18	0.742	1.91				1.92	2.41	-0.866	-1.13	-0.971
		1.28	0.0943	0.863	-1	1.22	0.852				1.38	0.811	-0.0415	-2.69	-0.179
		-0.119	0.626	1.07	-1.02	0.773	0.812				1.12	0.86	-0.162	0.559	-0.196
		-0.719	0.351	-1	-0.563	0.78	-0.206				1.93	-0.368	-0.651	-1.11	-1.07
		0.827	0.0621	-0.961	-1.42	0.541	0.263				1.48	1.28	-0.246	-1.29	-1.14
		0.755	0.0889	-0.281	-0.762	0.0879	-0.429				0.912	0.478	0.0952	-0.97	0.103
		0.946	0.477	-0.104	-1.19	0.634	0.0709				0.682	0.965	0.962	-1.41	-0.931
		2.35	0.967	-1.49	-1.25	0.105	0.356				1.15	0.264	-0.0804	-3.21	-0.152
		1.7	2.78	0.336	-1.71	-0.172	-0.918				1.61	3.17	-0.508	-3.18	-0.972
		0.269	1.27	-0.294	-1.42	0.336	-1.21				1.71	2.81	-0.544	-2.88	-1.74
		-0.0376	2.38	0.535	-2.42	-0.283	-0.873				2.03	3.41	1.08	-0.658	-0.428
		0.595	2	-0.643	-1.88	-0.23	-0.826				2.34	3.4	0.163	-0.0483	0.349
		0.908	2.78	-1.7	-1.63	-0.18	-0.611				2	4.42	0.188	-0.356	-1.18
		1.17	2.09	-0.165	-1.69	0.108	-0.727				1.57	3.55	-0.331	-0.961	-1.06
		1.37	2.4	-0.752	-1.34	0.696	-1.05				1.08	3.3	-1.11	-1.75	-1.92
		0.871	2.68	0.124	-1.55	0.459	-0.742				0.549	2.16	-0.484	-2.39	-0.202
		0.655	2.36	-0.231	-2.31	0.323	-1.32				0.341	1.59	-1.45	-1.75	0.0616
		-0.119	2.49	-0.382	-1.46	0.402	-0.645				0.246	2.18	-1.14	-0.985	0.893
		-0.749	2.67	-1.01	-1.86	-0.0197	-0.633				0.0356	2.17	-0.0848	0.456	0.362
		0.842	2.03	-0.933	-1.88	0.0206	-0.703				-0.359	2.61	0.49	1.03	-0.531
		0.427	2.11	-0.912	-1.71	-0.544	-0.884				-0.231	3.3	0.554	-0.31	-0.529
		0.348	1.91	-0.0507	-1.85	-0.192	-0.254				-0.194	2.83	-0.832	-1.42	-0.414
		0.778	2.36	-1.63	-1.51	-0.289	-0.239				0.151	1.59	-0.45	-1.11	-0.798
		0.683	1.33	0.524	-1.33	-0.291	-0.981				0.397	2.91	0.0145	-1.06	0.0363
		0.978	1.32	-1.8	-1.3	-0.261	-0.898				0.112	2.49	-0.212	-0.674	-0.91
		0.46	0.569	-1.11	-0.158	-0.391	-0.945				1.03	2.09	-0.69	-0.441	-0.757
		0.272	0.804	-1.73	-0.344	-0.66	-0.995				2	1.34	-0.0311	-0.0787	-0.671
		1.29	1.24	-1.57	-0.192	-0.364	-0.926				1.39	2.48	0.267	0.11	-1.71
		0.736	0.355	-0.64	-0.49	0.497	0.369				1.15	3.42	0.0902	0.697	-2.19
		0.586	1.41	-0.366	-1.28	0.714	1.37				0.582	4.11	-0.403	0.713	-0.419
		0.748	1.49	0.621	-0.877	0.993	1.87				0.0862	3.36	0.0874	-0.244	1.29
		0.373	1.55	0.601	-0.624	1.27	1.75				-0.0938	3.3	0.0955	-0.586	-1.75
		0.29	0.936	0.853	0.217	1.17	1.02				-0.138	2.33	0.55	0.644	-1.29
		0.447	0.108	-1.58	0.499	0.539	1.86				0.381	1.91	0.587	-0.401	-1.88
		0.42	-1.24	-0.18	-0.102	0.31	1.06				0.229	1.14	1.09	0.494	-0.0905
		1.24	-1.79	-0.67	-0.745	-0.228	0.704				-0.351	3.14	1.2	-0.611	0.0906
		0.128	-1.97	-1.6	-0.874	-0.22	0.242				-0.251	1.47	1.37	-1.79	-0.384
		1.26	-1.74	-1.68	-0.679	-0.0699	-0.0578				-0.336	1.82	1.93	-1.7	-1.35
		0.085	-1.28	0.352	-1.37	0.633	-0.0186				-0.467	2.47	1.13	0.125	0.51
		0.582	-1.09	0.334	-1.27	0.428	-0.798				-0.0367	2.01	1.27	-0.314	-0.471
		1.3	0.126	-0.0627	-1.43	0.571	-1.12				-0.158	2.4	1.37	-1.86	-0.71
		0.433	-0.424	-3.03	-1.46	0.274	-0.598				-0.433	2.89	0.606	-2.91	0.114
		-0.054	-1.13	-1.74	-1.27	0.872	-0.228				-0.466	3.14	0.804	-2.08	0.146
		0.0777	-2.18	-0.538	-1.63	0.927	-0.684				1.23	2.97	0.825	-1.95	1.01
		-0.781	-1.27	-0.614	-0.784	1.27	-1.06				1.86	1.95	0.47	0.746	0.175
		-0.176	-1.37	-1.43	-1.22	0.582	-1.57				1.27	1.24	1.07	-1.02	0.45
		0.73	0.278	-1.21	-1.53	0.803	-1.34				1.04	2.34	0.386	-1.32	-0.443
		0.418	0.239	-2.49	-1.46	0.813	-1.15				1.21	2.58	1.07	0.51	1.14
		-0.194	1.36	-2.7	-1.34	0.559	-0.342				1.22	2.28	1.89	-0.946	0.604
		-0.528	0.704	-2.23	-1.52	0.326	-1.09				1.2	1.29	1.99	-2.27	0.939
		-0.601	0.944	-0.77	-1.36	0.644	-0.242				0.957	3.64	1.63	-2.57	0.707
		0.276	1.53	-0.136	-1.22	0.571	0.289				0.652	1.93	0.819	-1.06	-0.646
		1.6	0.362	-0.0552	-1.06	0.619	-0.742				0.801	1.79	1.34	-1.71	-0.288
		1.71	1.77	-0.237	-1.25	-0.139	-0.891				0.582	1.59	1.07	-0.449	-0.894
		1.28	0.351	-0.615	-1.44	-0.193	-0.924				0.48	1.48	1.21	-0.283	-1.82
		1.66	-0.0761	-0.00838	-0.976	0.383	-0.184				0.956	1.36	0.686	0.629	-1.76
		1.92	0.633	-0.885	-1.59	0.464	0.0462				2.38	1.66	0.165	-0.429	-1.96
		1.82	0.619	-1.2	-1.19	0.732	0.378				2.01	1.42	0.819	0.924	-1.91
		2.41	-1	-0.765	-0.638	0.954	0.233				2.11	1.83	0.305	1.09	-0.45
		2.07	-0.131	-1.72	-1.85	0.479	0.604				1.72	2.33	1.23	0.653	-0.89
		0.49	0.0647	-1.11	-1.54	-0.164	-0.00273				1.39	1.39	0.149	0.736	-0.798
		0.574	-0.116	-3.15	-2.58	-0.314	-0.139				0.629	1.15	0.643	-0.0552	-0.503
		0.0763	0.738	-2.52	-2.57	-0.494	-0.062				0.406	1.35	0.376	-1.8	-1.02
		0.596	0.811	-1.85	-3.46	0.141	0.656				-0.257	1.66	0.318	-2.06	-0.449
		-0.429	0.207	-3.05	-2.32	0.595	0.241				0.0883	2.42	0.441	-0.454	0.118
		-0.671	0.0401	-0.85	-2.12	-0.174	-0.0514				0.296	1.21	0.616	-0.932	-0.668
		-0.32	-0.359	-2.12	-3.12	-0.702	-0.479				0.0839	2.27	0.833	-2.16	-1.52
		-0.311	0.435	-0.0162	-2.15	-0.809	-1.62				-0.157	2.46	1.13	-1.86	-1.34
		-0.0233	0.492	-1.3	-3.53	-0.521	-0.128				-0.753	2.91	1.25	-0.952	-2.35
		-0.074	0.794	-1.82	-2.88	-1.01	1.36				-1.39	2.21	2.38	-1.16	-0.889
		-0.503	1.48	-0.862	-2.78	-1.3	1.81				-2.07	3.18	1.15	-1.63	-0.153
		-0.808	1.23	-0.922	-1.88	-0.954	1.73				-1.78	1.87	2.14	-0.358	-0.456
		0.601	1.52	0.0255	-2.03	-0.381	0.749				-1.67	1.18	0.368	1.44	-1.3
		-0.38	1.07	-1.35	-2.93	-0.645	0.98				-1.79	1.98	-0.24	1.23	-1.26
		0.773	1.41	-0.599	-2.81	-1.16	0.564				-0.915	1.63	0.205	0.535	-1.63
		0.617	2.91	-1.6	-2.18	-1.19	0.737				-0.989	1.9	1.49	0.724	-1.72
		0.0517	1.47	-0.15	-2.44	-0.653	1.79				-0.778	3.21	1.75	0.878	-1.06
		0.724	0.616	-0.911	-2.45	-0.688	2.38				-0.426	1.83	0.561	-0.907	-1.44
		0.764	0.578	-0.371	-2.27	-0.444	1.85				-0.434	2.83	0.525	-0.552	-0.985
		0.775	0.435	0.585	-2.91	-0.369	0.469				-0.766	1.57	1.36	1.03	-0.205
		-0.0587	0.126	-1.31	-2.6	-0.793	-0.243				-1.14	2.45	0.842	-1.22	-0.188
		1.4	0.918	-0.0692	-2.71	-0.459	-0.0768				-1.27	1.93	-0.255	-0.656	-1.39
		0.291	3.1	-2.73	-2.43	-0.692	-0.536				-0.777	2.28	0.135	-2.22	-1.65
		0.341	1.78	-1.38	-3.48	-0.971	-0.343				-1.27	2	0.76	-2.12	-0.743
		0.13	1.05	-0.82	-1.62	-0.972	-0.294				-1.34	2.41	-0.352	-3.04	0.243
		-0.543	-0.318	-0.965	-1.76	-0.84	0.0973				-1.28	2.74	-0.799	-2.5	0.574
		-0.2	-2.36	-0.354	-1.79	-0.867	1.45				-0.651	1.13	-0.135	-3.27	-0.664
		0.441	0.153	-1.27	-2.47	-0.476	0.809				-0.416	1.7	-0.453	-3.14	-0.406
		0.169	-1.5	-0.889	-1.1	-0.632	0.172				0.13	1.52	0.395	-2.65	0.0816
		0.126	-0.138	-0.887	-1.74	-0.712	0.0268				0.389	1.45	2.39	-0.298	0.231
		0.0777	-2.8	-1.18	-2.36	-0.607	0.355				-0.171	2.2	1.27	-1.62	-0.918
		-1.02	-1.65	-1.6	-2.87	-0.53	0.541				-0.484	0.923	0.208	0.296	-0.601
		-1.2	-0.457	-1.02	-1.4	-0.844	-0.705				-0.976	0.634	-0.0562	-0.657	-0.521
		-1.11	0.357	0.0763	-2.31	-0.13	-1.13				-1.31	1.57	-0.0653	-3.17	-0.507
		-0.167	-0.183	-0.666	-1.85	-0.321	-0.998				-1.22	1.48	0.332	-2.75	-1.04
		-0.064	-0.821	-1.01	-2.02	-0.52	-1.47				-0.737	1.56	-0.264	-1.39	-0.916
		-0.0512	-0.888	-1.45	-1.55	-0.148	-1.04				-0.344	0.616	0.184	-0.495	-1.64
		0.589	-1.45	-1.69	-1.24	-0.284	-0.758				0.427	0.995	-0.32	-0.885	-0.519
		-1.14	-0.363	-0.513	-1.61	0.0445	-0.795				0.401	0.936	-0.774	-1.68	-0.695
		0.0951	-0.202	-0.388	-1.57	-0.0668	-0.507				0.491	0.805	-1.02	-3.18	-1.01
		-0.193	-0.737	0.289	-1.52	-0.268	-0.589				0.145	0.865	-1.07	-4.43	-0.84
		-0.619	-1.47	-2.09	-1.48	-0.0961	-0.908				0.157	0.292	-1	-4.57	-0.609
		0.363	0.567	-1.3	-1.86	-0.233	-1.52				-0.152	1.64	-0.703	-1.82	-1.29
		1.32	-2.25	-1.12	-0.946	-0.364	-1.56				-0.184	2.83	-0.6	-1.57	-0.561
		0.428	-1.48	-1.05	-0.738	-0.3	-0.774				-0.213	2.66	0.525	-2.3	-1.84
		-0.191	-0.363	-0.599	-0.74	0.115	-1.11				-0.396	2.28	-1.13	0.0393	-1.97
		-1.35	-0.886	2.37	0.527	0.289	-1.03				-0.806	1.88	-0.689	-2.01	-1.75
		0.152	-0.593	0.149	-0.652	0.152	-1.03				-0.789	1.59	-1.05	-1.29	-1.41
		-0.0374	-0.96	0.368	-0.572	0.161	-1.62				-0.22	1.84	-0.289	-2.67	-1.54
		-0.214	-2.36	-0.566	-1.31	-0.264	-1.77				-0.0597	2.58	0.285	-1.14	-1.3
		-0.525	-1.07	-0.857	-1.41	-0.385	-1.06				0.422	2.01	-0.175	-1.68	-0.241
		-0.664	-1.39	-0.961	-2.09	-0.562	-0.223				0.398	1.43	-1.11	-2.47	-1.75
		-0.442	-1.79	0.409	-1.6	-1.09	-0.991				-0.219	2.21	-0.167	-1.87	-0.935
		-0.0428	-1.81	-0.596	-2.86	-0.143	-1.18				-1.02	1.73	-0.926	-3.37	-0.426
		0.6	-0.0184	-0.234	-2.14	-1.39	-1.07				-0.908	1.68	-1.03	-0.757	-0.773
		0.588	-0.249	1.59	-2.37	-1.28	-1.25				-0.823	1.38	-0.661	-2.27	-0.704
		1.3	-1.04	-1.01	-2.19	-0.679	-0.799				-0.545	2	-0.784	-2.52	0.345
		1.99	-0.991	-1.27	-3.6	-0.596	-1.29				-0.726	2.08	-0.547	-1.64	-0.726
		-0.252	-1.57	-0.146	-4	-0.367	-1.55				-0.853	2.15	-0.896	-0.638	0.745
		-0.174	0.336	0.0614	-3.27	0.706	-1.17				-0.475	2.5	-0.49	-0.856	-0.161
		-0.0485	-0.489	0.696	-2.95	1.48	-0.769				-0.029	2.95	-0.435	-1.95	1.05
		0.813	-2.23	1.55	-1.99	1.82	-0.266				0.13	2.77	0.87	-2.8	1.7
		1.4	-2.21	1.64	-2.63	1.7	0.301				0.219	2.57	1.53	-1.45	1.42
		0.973	-1.63	2.18	-1.98	1.45	0.167				0.111	2.63	2.47	-3.19	1.87
		1.42	-2.13	2.01	-1.56	1.65	0.866				0.336	1.57	2.91	-1.39	1.38
		1.03	-1.05	2.14	-2.63	0.945	0.467				0.347	2.02	2.6	-1.41	-0.565
		0.238	-0.67	2.45	-2.74	0.401	-0.137				0.482	2.35	2.57	-1.99	0.781
		1.07	-2.04	0.953	-2.34	-0.0885	0.613				0.0935	2.29	3.07	0.4	1.52
		-0.132	-3.01	-0.626	-2.99	-0.113	1.64				-0.228	2.53	1.53	0.809	-0.311
