# Supplementary material for: Metabolic sensing in AgRP neurons integrates homeostatic state with dopamine signalling in the striatum
Source: eLife journal article supplement (doi:10.7554/elife.72668), 2022-01-12
Supplement: fig5-data1 [file Fig5M.xlsx]

## Sheet: Sheet1
wt								ko
-0.178	0.452	-0.136	2.04	-2.06	-0.426			-1.77	0.78	0.315	-1.96	0.218	-1.19	-0.208
1.51	-0.894	-0.922	0.665	-1.43	-0.0848			-1.67	0.51	0.972	-2.36	-0.232	-1.45	-0.163
2.56	1.77	-0.123	0.179	-0.453	0.408			-1.31	0.839	1.7	-0.894	-0.639	-1.73	-1.7
2.78	0.461	0.0385	-0.617	-1.05	-0.0453			-1.34	0.251	-0.378	-0.0445	-0.751	-2.33	-0.634
1.88	0.681	-0.173	-0.598	-1.85	0.816			-1.97	-0.0605	-0.915	-0.171	-0.574	-1.63	-1.61
0.775	0.566	0.211	1.01	-1.89	-0.382			-1.52	-0.157	-0.26	0.668	-0.415	-1.27	-1.32
0.353	1.29	0.323	-0.77	-1.03	0.128			-0.462	0.905	-1.24	0.574	-1.35	-1.68	-1.65
0.455	1.01	-0.803	0.452	-0.735	-1.27			-0.716	0.708	-1.07	0.0186	-0.336	-0.594	-0.385
0.0193	0.613	0.726	-0.691	-0.406	-1.67			0.806	-0.255	0.342	0.368	-0.148	-1.27	-1.62
-0.303	2.54	1	0.132	-0.968	0.0654			1.05	-1.59	0.681	0.488	0.18	-0.851	0.256
-0.294	1.52	0.295	-1.43	-0.813	-1.41			1.23	-1.37	0.437	0.77	0.705	-0.497	-0.741
-0.454	1.16	0.392	-0.399	-0.495	-0.702			0.898	-0.786	-0.284	0.762	0.849	-1.1	1.39
-0.499	-0.286	0.281	1.31	-0.343	-0.294			0.909	-1.5	1.49	0.276	0.57	-1.54	-0.505
-1.06	0.369	0.635	0.698	-1.21	1.22			1.49	-1.13	2.15	0.235	0.785	-0.469	-1.36
-0.863	-1.83	0.366	-0.01	-1.26	-1.06			0.987	-1.38	1.33	-0.444	0.0174	0.449	-0.694
-1.06	-1.04	1.06	-1.07	-1.37	0.327			0.775	-1.19	-0.906	-0.429	-0.289	0.542	1.17
-0.621	1.59	0.00382	-2.07	-1.62	-0.346			0.784	-1.52	-0.28	-0.452	0.471	0.722	0.274
-1.34	0.0826	-1.06	0.475	-1.33	-1.32			1.72	-0.412	1.16	-0.729	-0.374	0.835	-0.309
-0.756	-0.262	0.381	-0.338	-1.53	-1.14			2.9	-0.743	0.751	-0.548	-0.417	0.488	-0.124
-0.227	-0.699	0.831	-0.108	-0.964	-1.43			1.75	-1.2	-0.173	-0.0966	-0.762	1.03	-1.78
0.677	0.589	-0.474	0.0835	-0.945	0.236			0.656	-0.339	0.0497	-0.191	0.365	1.12	-0.911
1.01	-0.648	1.16	-0.00972	-0.792	0.0738			-0.0992	-0.985	-0.107	0.464	0.0673	0.904	-0.529
1.34	0.219	-0.433	-0.657	-0.982	-0.328			0.0027	-1.43	0.788	0.0478	0.791	-0.0615	1.18
0.763	1.52	0.0088	-0.734	-1.54	-0.7			0.199	-1.38	1.29	-0.0583	1.72	-0.548	0.982
-0.0249	0.79	0.536	0.139	-1.56	-0.548			0.0935	-0.464	1.54	-0.255	1.87	0.0236	-1.65
-0.408	1.64	-1.52	-1.28	-0.452	-0.956			-0.357	-0.911	1.51	1.1	0.997	-0.185	-0.185
-0.27	1.79	-1.59	1.12	-0.137	-0.685			0.131	-0.409	-0.141	0.696	1.17	-0.687	-0.325
0.332	-1.02	-1.39	-0.128	-0.0608	0.238			0.203	-0.896	0.704	1.09	0.928	-0.139	0.979
0.564	-0.8	-0.107	1.69	-0.138	-1.66			0.0381	-0.465	-0.254	0.368	0.899	-0.579	-1.36
0.323	0.595	1.18	1.04	-1.06	1.14			-0.508	-0.912	0.12	0.526	0.122	-0.826	-0.67
-0.0905	0.994	1.08	0.973	-0.757	1.81			-0.0115	-1.02	-0.746	-0.244	-0.868	-1.19	1.08
-0.35	-0.603	1.1	1.25	0.0184	1.23			0.428	-1.13	0.00399	-0.357	-0.173	-1.52	-0.459
-0.386	-0.129	1.29	1.36	-0.418	0.487			-0.489	-0.222	0.203	-0.607	0.118	-0.973	-1.42
-0.512	0.2	0.0151	0.301	0.178	0.812			0.485	-1.19	1.31	-0.528	-0.0142	-1.25	-0.231
-0.256	0.812	0.123	0.764	1.89	0.853			0.871	-1.23	-0.635	-0.478	-0.338	-0.561	-0.35
-0.21	0.298	-0.557	1.62	0.353	-0.0699			0.842	-1.2	-0.284	-0.971	-0.575	-0.844	-0.0943
0.958	0.294	1.47	2.16	0.749	1.25			0.272	-1.42	0.21	-1.38	-0.866	-0.126	1.17
1.19	-0.741	-0.453	3.09	-0.101	0.285			-0.0434	-0.357	0.613	-1.48	-0.567	0.703	1.13
0.501	1.08	-0.0785	1.68	0.33	-0.0502			0.252	-0.842	-0.899	-0.332	-0.97	0.897	-1.04
0.813	0.548	0.00703	1.04	0.854	0.18			0.603	-1.05	-0.225	1.24	-1.27	0.233	-0.878
1.04	1.03	-0.712	0.468	1.61	0.0818			0.636	-1.48	-1.93	1.27	-2.09	-0.0462	-0.22
1.43	-2.15	-0.173	0.449	0.945	0.782			-0.085	-1.15	0.285	1.21	-2.1	0.827	-1.76
1.8	-1.4	-1.21	-0.026	0.863	0.18			1.15	-1.73	-0.0179	2.52	-1.68	0.0527	0.651
1.43	0.0726	-1.06	-0.0348	0.231	-1.82			0.379	-1	-0.396	1.63	-1.55	0.463	-0.16
0.861	-0.116	0.11	0.906	1.13	0.0746			0.983	-1.04	-0.764	1.45	-1.82	0.151	0.209
0.41	-0.122	-1.84	0.945	0.172	0.392			0.557	-0.136	0.797	1.25	-1.15	-0.445	0.238
-0.708	-0.224	-1.13	0.819	0.261	0.15			0.185	-0.1	-1.92	1.67	-0.831	-0.925	-0.425
-0.177	-0.242	-2.98	0.583	0.858	-1.72			-0.0495	-0.498	-2.44	1.08	-0.528	-0.756	0.19
0.49	1.19	-0.667	-0.319	1.18	-0.881			0.648	-0.234	-0.682	0.264	-0.676	-0.642	0.0474
1.2	-1.34	-1.57	-0.272	2.42	-0.892			0.441	0.283	-0.63	-0.796	-0.0477	1.07	-0.294
0.295	-1.61	-0.212	-1.19	2.14	0.778			1.93	-0.131	-0.686	0.154	0.037	1.41	-2.06
0.0837	-0.984	-1.8	-0.0892	1.36	0.741			1.95	-0.0793	-3.27	-0.994	0.273	2.38	0.347
0.212	0.216	-1.28	-0.483	0.722	-0.541			1.08	-0.166	-2.77	-0.315	-0.5	1.43	-1.45
0.532	-0.966	-0.951	1.37	0.952	-1.47			0.907	-0.265	-0.957	-0.943	-0.292	0.895	-0.639
0.282	-0.335	-0.767	0.374	0.00369	-1.13			0.537	-0.133	-1.33	-0.462	-1.14	1.11	2.06
0.586	-0.218	-1.71	0.272	-0.377	0.143			0.943	-0.23	0.454	-0.759	-1.42	0.145	-0.336
1.43	0.665	-0.816	-0.148	0.677	-0.727			-1.31	0.743	-0.422	-0.277	-1.88	0.221	-0.959
1.32	-1.2	-1.95	-0.175	1.87	0.877			-1.22	-0.106	0.213	-0.775	-1.5	0.446	1.82
1.04	0.31	-0.998	-1.5	0.207	0.58			-1.66	0.154	-1.74	-0.857	-2.16	0.605	2.6
0.659	-0.122	-1.63	-0.868	0.523	0.352			-2.08	-0.211	0.337	-0.955	-2.08	0.822	1.18
0.484	-0.598	0.896	-0.499	-0.608	-2.04			-1.91	0.0292	0.417	-0.957	-1.44	0.839	0.276
0.419	-0.756	-0.812	0.113	0.0122	-1.71			-1.32	0.0709	-0.00712	-1.13	-1.98	0.886	0.589
0.922	-1.11	0.0475	-1.39	-0.238	-1.19			-0.485	0.279	1.06	-1.55	-0.663	1.76	0.187
0.889	-1.95	-1.31	0.651	-0.457	-2.45			-0.642	0.277	-0.414	-0.805	1.28	1.67	1.56
0.292	0.253	1.17	-0.185	-0.671	0.531			-0.866	1.38	-0.1	-1.11	0.434	0.538	0.141
0.048	-1.38	0.449	-0.42	1.43	0.604			-0.349	1.66	-0.185	-0.616	0.452	0.356	0.912
0.464	-0.391	0.949	0.378	1.18	-0.106			-0.337	1.04	-1.09	-1.57	1.72	-0.858	-0.42
0.494	1.24	-0.719	0.501	0.474	-0.428			0.713	0.346	-1.66	-1.3	1.42	0.538	-1.2
0.0679	0.36	0.518	0.419	0.118	-1.42			0.0206	-0.335	-0.12	-1.01	1.47	0.364	-0.169
-0.399	-0.476	-0.749	-0.142	-0.581	0.638			-0.438	0.0487	1.83	-0.833	1.57	0.0266	1.09
-0.552	1.99	0.895	-0.868	-0.0173	0.566			-0.176	-0.11	-1.3	-1.47	1.07	-0.187	1.51
-1.34	-1.46	2.99	-0.226	-0.879	0.565			0.348	0.74	0.104	-1.36	1.26	0.124	0.742
-1.29	-0.992	1.43	0.58	-0.398	-1.03			0.137	0.33	0.175	-0.862	1.37	0.00296	-0.295
-0.274	-1.21	0.954	-0.832	-0.647	1.74			-0.739	0.281	0.38	3.14	1.31	0.994	1.51
0.0838	0.344	1.32	0.185	-0.709	0.212			0.718	0.424	-0.687	2.68	1.3	-0.457	0.998
0.52	1.44	1.33	0.391	-0.765	-0.467			0.0268	0.564	-0.56	1.66	1.14	-0.293	0.0551
0.417	0.255	0.573	-2.71	-1.2	-0.363			-1.04	0.0166	-0.634	1.33	1.02	-0.0417	-0.108
0.664	-0.132	0.48	-1.71	-0.9	1.39			-0.681	1.16	1.47	1.48	0.883	-0.169	0.754
0.653	0.905	0.848	-1.46	0.277	1.23			-1.29	1.19	1.31	1.13	0.959	-0.72	1.92
0.239	-0.878	0.783	-1.17	1.39	0.575			-0.339	1.23	0.644	0.358	0.69	0.182	-0.0551
-0.363	-1.75	0.866	-1.27	2.46	1.03			0.434	0.639	0.294	-0.197	0.0915	-1.36	-0.0201
-0.627	-0.781	1.06	0.419	1.22	-0.437			1.32	0.428	1.48	0.0558	1.04	-0.807	1.54
-1.4	-0.378	-1.98	-0.37	0.747	0.142			0.847	1.4	1.21	0.139	0.601	-0.913	0.0351
-1.54	1.16	-0.43	-0.454	0.339	1.19			0.704	0.483	0.323	-0.349	0.69	-1.04	0.0805
-1.21	0.326	0.404	-0.275	-0.203	1.75			0.995	0.532	0.664	-0.919	0.713	-1.29	0.817
-1.34	0.0201	-0.794	0.0694	0.405	-0.579			-0.338	0.451	0.295	-0.305	0.696	-1.16	-0.566
-1.1	1.79	-0.327	-1.31	-0.0595	-1.79			0.838	0.656	-0.248	-0.334	-0.303	-1.44	0.335
-1.11	0.216	0.172	-0.583	0.935	-0.389			0.246	0.274	0.995	-0.1	-0.0939	-0.58	-1.25
-0.945	0.0404	0.242	-0.669	1.62	-1.29			-0.896	0.771	0.0189	0.77	0.586	-0.731	-0.226
-0.333	0.304	-0.24	-0.182	1.14	0.289			-1.3	0.0843	-0.998	1.52	0.0396	-0.215	0.376
-1.52	-1.14	1.2	-2.49	0.138	0.447			-1.03	0.463	-0.272	1.39	0.285	0.797	0.727
-1.62	-0.464	0.569	-1.51	0.748	1			-0.977	0.46	0.555	0.694	1.18	0.27	0.155
-1.69	0.509	0.233	-1.13	0.116	0.226			-1.89	0.712	-1.1	0.0261	1.17	1.21	-1.15
-1.19	-0.26	0.26	-0.702	-0.176	1.03			-1.25	2.22	0.189	0.112	-0.125	0.954	-0.442
-1.56	0.145	1.27	0.442	0.411	1.19			-1.66	2.28	-0.541	0.0496	0.881	1.87	1.65
-0.824	-0.939	0.779	1.93	-0.294	0.977			-1.08	2.51	0.793	-0.326	0.696	0.616	0.993
-0.958	-1.4	1.6	-0.0543	-0.417	0.724			-0.594	2.51	0.837	-0.461	-0.53	0.929	-1.48
-0.397	-2.02	0.0239	0.86	0.792	2.07			-0.177	2.15	0.455	0.39	-0.526	1.83	0.545
-0.802	-0.124	0.615	0.613	0.9	2.06			-0.616	1.79	1.4	0.492	-0.437	2.23	1.34
-2.07	1.02	0.317	-0.0559	1.28	1.56			0.0655	1.83	-0.549	-0.00643	-0.344	1.78	0.263
-3.07	-0.705	0.757	-0.335	0.749	1.01			0.97	1.44	0.564	0.0938	0.654	1.4	0.526
-3.26	-0.955	0.25	-0.549	0.302	0.502			1.29	1.73	0.388	-0.101	0.0264	0.959	1.71
-2.92	0.0302	-0.195	0.155	-0.0216	-0.26			1.16	2.53	0.169	1.5	0.289	1.22	-1.04
-2.97	-0.427	0.636	-0.872	0.769	0.411			0.424	1.34	0.138	2.98	1.02	1.12	1.42
-2.39	0.141	0.374	-0.0951	0.716	-0.443			-0.0142	2.23	0.81	2.44	0.762	1.14	0.0594
-1.43	1.59	-0.683	-0.777	0.317	-1.44			-0.195	1.69	-0.582	0.981	0.436	0.617	-0.766
-1.16	1.57	-1.01	1.3	-0.0218	-1.19			-0.391	1.45	0.564	1.67	0.549	0.116	-1.92
-0.989	-1.32	-2.4	0.416	0.225	-1.41			-1.02	0.717	1.38	1.61	1.56	-0.0416	-0.00719
-1.2	1.04	-2.57	0.835	0.35	0.845			1.25	1.42	-0.536	1.4	0.801	-1.41	0.738
-0.495	-0.637	-0.243	0.707	0.425	1.2			-0.155	1.16	1.66	0.727	0.626	-0.923	0.432
-0.984	-1.51	-1.11	1.3	-0.497	-1.82			-0.0572	1.34	-0.255	0.448	0.634	-0.614	-0.292
-1.71	-1.04	-1.65	-0.695	0.0448	1.03			0.394	-0.0431	1.29	1.1	0.189	-0.91	0.0194
-1.1	-0.867	-1.26	-0.241	0.567	-0.0973			0.382	0.328	0.7	1.18	-0.284	-1.01	1.68
-1.65	0.28	-2.21	-1.58	-0.0693	-0.13			-0.0575	1.39	0.508	0.54	0.0636	-1.25	1.19
-2.05	0.149	-0.73	-1.56	-0.0913	-0.756			-0.401	1.9	-1.42	1.28	-0.0512	-1.7	1.42
-2.23	0.558	-1.46	-0.891	0.12	-1.08			0.0421	1.85	-0.989	1.3	0.0111	-1.95	0.272
-1.72	0.224	-0.544	-1.63	-0.257	0.823			0.9	1.02	0.822	0.582	-0.0388	-2	0.095
-1.24	-0.154	-0.00196	-1.76	-0.686	0.14			0.292	0.864	-0.503	0.768	-0.0282	-1.2	-1.7
-1.44	-2.03	-1.24	-1.19	0.552	0.384			-0.264	0.27	-0.21	0.615	-0.618	-0.0693	1.2
-1.37	-1.47	-0.936	-3.45	0.155	0.0727			-0.669	1	-0.767	0.0771	-0.339	-0.878	1.18
-0.9	-0.272	-0.208	-0.729	0.684	-0.935			-1.66	1.42	0.439	0.0814	1.02	-1.06	0.224
-1.53	0.405	-0.543	-0.38	1.49	-0.0704			-0.851	0.881	0.0958	0.319	0.00129	-1.42	1.22
-1.95	0.663	-0.294	-1.26	1.98	-0.267			-1.76	1.44	0.0386	1.4	-0.177	-1.97	0.925
-1.79	-2.29	-0.675	-1.87	1.92	0.354			-1.46	1.73	0.333	1.97	0.381	-1.69	0.308
-1.85	-1.35	-0.195	-1.93	1.36	0.552			-1.92	0.654	-1.12	1.08	0.975	-1.42	0.0785
-1.61	0.0216	1.12	-0.32	0.604	0.318			-1.17	1.2	-0.813	2.09	0.579	-2.1	-0.905
-2.4	1.09	-0.402	-0.929	1.15	0.815			-1.68	0.961	1.02	2.06	0.29	-2.62	-0.951
-2.05	-0.627	0.413	-0.424	0.27	1.35			0.0705	0.835	0.104	1.01	0.165	-2.36	-0.207
-2.06	0.172	0.102	-0.464	-0.0117	1.52			0.131	0.993	-0.00128	1.18	0.961	-2.08	-0.0991
-1.38	-1.57	1.94	2.28	0.533	0.136			1.19	1.4	1.68	1.04	0.588	-2.02	0.674
-1.28	-0.109	0.688	0.5	-0.195	-0.019			0.102	1.21	2.2	-0.46	0.662	-1.73	1.13
-1.43	0.956	0.568	1.62	-0.107	-0.155			0.586	2.12	0.508	-0.0345	-0.122	-1.4	-0.106
-1.71	-0.237	1.22	1.92	0.262	0.595			1.55	0.997	0.743	-0.345	0.083	-1.43	-0.556
-1.76	-1.72	1.61	2.68	0.217	-1.02			1.28	0.773	1.16	-0.994	-0.499	-1.59	-0.638
-1.23	-1.14	0.961	4.22	-0.56	-0.536			-0.243	0.909	1.22	-1.29	-0.503	-2.76	0.311
-1.64	-1.1	0.503	3.82	-0.434	0.0404			-0.153	1.55	0.75	-1.17	0.427	-1.86	-0.35
-2.15	0.927	0.0513	3.35	-0.648	-0.948			-0.181	0.972	1.29	-1.65	0.281	-0.964	0.145
-2.26	-0.0211	0.0534	3.71	-0.598	-2.14			1.14	0.305	1.49	-1.92	0.202	-0.872	0.0297
-2.7	-1.67	0.725	3.9	-0.781	-0.248			-0.565	1.63	0.927	-2.13	-0.262	-2.19	1.19
-3.63	-1.06	0.875	4.08	-0.648	-1.18			-0.365	0.889	1.55	-1.87	0.217	-1.44	-0.795
-2.97	0.00996	2.04	4.03	0.41	0.339			-0.609	0.779	2.12	-2.52	-0.26	-0.765	0.992
-2.22	-0.314	0.153	3.59	0.447	-0.312			-1.55	1.2	2.74	-1.52	-0.194	-0.051	0.22
-2.51	-0.926	-0.339	5.4	0.399	-0.805			-1.03	1.48	0.791	-1.28	-0.916	-1.05	2.26
-2.65	-0.969	0.0993	2.16	-0.158	0.0167			-0.999	1.03	0.402	-0.86	-0.8	-0.574	1.16
-3.06	0.995	0.716	2.07	0.702	-1.82			-1.57	1.62	1.6	-1.34	-1.03	-0.302	0.0143
-2.96	-2.27	1.85	0.65	-0.226	-1.55			-1.67	1.02	1.8	-1.18	-0.777	-0.351	0.58
-2.23	-3.33	0.919	1.54	-0.252	-0.0872			-1.4	0.523	-0.436	-0.756	-1.1	-1.37	-0.774
-2.82	-0.413	0.00294	2.01	-0.595	1.7			-1.48	0.148	0.899	-0.286	-1.1	-1.32	0.113
-1.58	0.595	1.6	0.481	-0.729	0.568			-2.03	0.132	0.636	-0.362	-0.166	-1.87	0.545
-0.581	-0.655	0.918	-0.0872	-1.34	-0.108			-2.29	-0.0591	1.05	-1.32	-0.0194	-2.05	0.642
-0.354	-1.04	0.616	2.98	-0.779	-1.21			-2.22	0.411	0.199	-2.07	1.97	-1.71	0.738
-1.25	-2.36	-0.367	4.78	-1.82	-1.34			-2.54	0.672	-0.321	-1.26	3.64	-1.54	1.38
-0.628	-0.316	0.316	5.98	-0.899	-0.0366			-3.02	-0.241	-0.721	-1.21	3.52	-1.24	1.06
0.243	-2.41	-0.174	6.14	-1.23	0.000262			-1.95	0.268	0.597	-1.24	3.08	-1.1	0.0598
-0.168	-1.89	-0.658	4.88	-0.865	1.26			-0.59	-0.312	0.0229	0.0268	2.58	-1.24	0.982
-0.759	-1.13	0.684	4.35	-1.01	-0.881			-1.72	-0.331	1.22	0.676	2.03	-1.43	0.0409
-2.02	-0.176	0.338	3.12	-1.23	1.45			-2.13	-0.251	1.28	0.679	0.975	-1.23	-0.212
-2.49	1.58	0.512	3.42	-0.905	1.48			-2.14	-0.222	-0.0853	0.985	0.821	-2.02	0.883
-2.48	-0.219	-0.893	2.47	-0.983	0.804			-3.25	-0.273	2.84	0.373	0.502	-1.1	-0.685
-2.24	0.15	1.37	2.09	-0.574	1.33			-3.83	-0.423	2.3	-0.406	1.75	-1.07	-0.0125
-0.646	0.237	0.611	2.96	0.995	0.655			-0.623	-0.384	1.79	-1.37	2.71	-1.49	-1.12
-0.617	0.196	0.777	1.68	0.556	1.89			0.531	-0.611	2.89	-1.17	2.18	-1.31	-0.356
-0.382	1.51	-0.104	1.75	1.2	1.54			0.811	-0.576	1.61	-1.45	2.11	-0.428	0.561
-1.58	1.56	1.73	0.782	0.508	1.6			0.794	-0.268	5.55	-1.71	2.08	1.53	-1.19
-2.32	-0.004	1.34	-0.453	0.635	2.41			0.0107	-0.0544	2.12	-0.843	1.55	1.46	-0.355
-2.5	0.067	-0.981	0.401	0.943	1.77			0.164	-0.207	1.94	-0.901	1.33	1.16	-1.07
-2.93	0.893	0.882	1.05	0.395	1.29			0.455	0.599	3.66	0.167	0.177	1.15	-2.16
-3.08	3.37	-0.0906	0.994	-0.557	0.603			-0.275	0.594	5.06	1.56	0.296	0.543	0.54
-3.33	1.39	0.187	1.78	0.0174	1.99			-2.36	0.0772	3.87	3.45	-0.101	1.19	1.61
-3.72	3.14	0.48	2.02	-0.276	2.09			-2.8	0.435	4.54	3.43	0.267	-0.122	1.53
-4.16	2.68	0.144	0.499	-0.599	0.916			-1.65	0.321	3.55	3.57	-0.0772	-0.655	0.00106
-4.01	-0.294	0.3	0.26	0.0149	0.52			-1.85	0.107	4.83	4.03	-0.468	0.204	0.37
-2.3	1.24	-1.06	2.78	-0.988	1.93			-1.99	-0.0467	4.08	5.44	-0.663	-0.653	1.14
-1.86	0.129	-0.844	1.82	-0.848	-0.433			-2.04	0.596	3.82	4.33	-0.622	-0.661	2.69
-0.777	2.74	-0.99	3.36	-0.252	-0.121			-2.42	0.716	2	2.98	-0.499	-0.255	2.58
-0.318	1.35	-1.51	4.74	-0.595	0.262			-1.19	0.793	2.16	2.27	0.888	-1.3	1.7
-1.03	0.991	-0.196	4.02	-1.19	0.0439			0.647	1.14	2.22	1.81	0.257	-1.22	1.27
-0.211	3.93	-1.8	4.29	0.0756	1.7			2.95	0.219	3.54	2.24	0.668	-1.11	4.14
1.2	1.46	-1.28	3.74	1.04	2.74			0.892	0.0306	2.9	2.71	-0.0481	-0.98	4.92
0.117	1.19	-2.65	2.81	2.29	2.4			1.48	0.759	2.09	1.47	0.138	-1.5	4.82
3.46	0.453	-1.41	3.32	2.83	2.78			1.11	0.89	6.11	0.6	-0.0683	-1.36	6.43
3.8	2.72	-2.19	3.17	1.49	2.75			0.949	0.315	4.9	0.423	-0.754	-1.04	4.93
2.07	2.13	-3.36	3.62	0.883	2.72			0.581	0.474	2.66	0.418	-0.817	-0.799	4.78
1.47	0.682	-1.77	3.07	0.226	1.33			0.493	0.307	3.82	-0.414	-0.917	-1.17	3.88
1.18	1.31	-2.42	2.39	-0.065	2.53			0.225	0.13	4.63	0.212	-0.351	-1.6	4.63
0.736	0.829	-3.47	1.06	-0.23	3.55			-1.54	0.327	5.32	0.778	-1.53	-0.93	4.49
1.39	1.41	-2.56	1.24	0.56	3.67			-2.21	0.338	5.91	0.784	-0.526	-0.917	3.24
0.941	3.19	-3.92	0.785	3.34	4.09			-3.2	0.831	5.62	0.4	-0.268	0.859	3.65
0.745	3	-1.97	0.798	2.91	3.78			-1.56	1.12	4.53	0.0767	-0.237	2.89	6.13
-0.677	0.725	-2.01	1.07	2.84	3.22			2.78	-0.201	5.62	0.196	1.79	3.07	3.16
-1.62	1.52	-2.17	1.94	2.56	3.72			2.75	1.25	5.31	-0.615	3	2	2.39
-2.4	1.51	-1.87	0.864	2.72	5.66			2.2	1.89	4.57	0.135	1.45	1.64	5.66
-0.915	2.71	-0.972	1.21	2.2	6.13			3.22	1.26	7.87	2.14	2.01	0.844	4.66
0.402	4.27	-1.07	1.73	1.84	4.96			4.2	1.99	6.59	5.59	2.03	0.459	3.94
-0.601	3.75	0.0488	0.803	3.31	4.15			6.96	2.16	6.69	4.19	2.63	1.74	2.69
-0.922	4.47	0.0239	1.18	3.04	4.67			5.79	2.16	5.83	3.5	1.62	2.93	1.26
0.343	5.08	-0.845	2.58	2.38	4.63			7.76	1.54	7.91	3.21	3.23	2.52	1.98
1.06	4.74	-1.35	3.02	0.904	4.59			8.28	1.77	6.88	2.35	2.41	0.684	2.74
1.95	1.89	0.158	3.47	0.253	7.26			9.8	1.82	4.46	1.45	3.08	0.349	0.697
2.06	3.48	0.64	2.3	-0.135	5.58			10.1	2.67	7.07	1.11	3.7	0.0582	2.38
1.06	2.65	-0.142	2.63	-0.0272	6.01			8.78	2.29	6.55	0.797	3.31	1.59	3
-0.488	4.29	0.91	2.8	1.81	5.64			7.11	2.56	6.51	0.69	2.43	2.11	2.34
-1.01	3.99	-0.307	2.82	4.39	3.65			7.64	2.57	6.74	1.81	3.61	1.78	3.36
-0.606	3.44	2.62	2.95	3.61	5.5			6.98	2.18	6.5	1.57	5.14	1.98	2.29
0.107	2.71	1.19	3.77	3.38	4.82			6.5	1.66	6.74	1.69	4.76	2.49	1.29
1.16	2.49	-0.187	0.611	2.5	5.6			6.65	1.63	6.39	2.11	4.8	1.97	2.3
0.807	2.97	-0.111	0.742	1.96	4.4			5.87	1.83	7.02	3.07	3.59	1.66	3.98
0.883	5.07	0.0711	-0.00263	1.9	4.47			5.21	2.08	6.8	3.62	2.98	1.66	2.23
0.271	3.33	0.885	-0.0581	1.78	3.32			4.6	1.77	9.03	1.61	3.57	2.14	1.6
0.618	2.52	1.76	-0.753	1.96	3.15			5.33	1.99	8.96	1.18	2.02	1.23	2.43
-0.101	4.2	1.74	-1.74	1.18	3.47			3.97	1.7	5.3	0.659	2.54	1.2	0.407
-0.153	3.82	1.51	-1.09	1.1	5.03			3.15	1.9	5.1	0.585	2.01	0.0911	1.4
-1.44	3.99	0.524	-0.864	0.649	3.69			1.98	1.22	5.78	0.89	2.43	1.01	1.19
-1.9	4.38	1.19	-0.197	-0.378	3.66			0.939	1.74	5.06	0.688	1.44	0.697	0.825
-1.67	3.92	-0.552	-0.978	-1.32	5.75			0.589	1.11	5.92	1.06	1.31	0.485	-1.18
-1.1	4.96	-0.91	-0.945	-0.843	4.74			0.239	0.998	6.29	1.35	1.15	0.39	1.84
-0.992	4.3	0.202	-1.31	-0.785	3.33			0.239	0.943	6.77	1.87	1.4	-0.141	1.19
-2.15	4.24	-1.34	0.0143	-0.292	3.2			0.901	1.46	5.3	0.668	1.08	-0.562	-0.251
-3.11	3.76	-0.761	-0.639	0.655	3.89			1.99	1.46	5.07	1.15	1.7	-0.234	0.267
-3.33	2.79	0.396	-2.13	2.23	3.75			2.54	0.598	6.64	1.33	1.27	-1.03	1.92
-2.08	2.32	-0.428	-1.16	1.45	3.21			2.33	1.39	5.87	1.09	2.02	-0.161	3.21
-0.876	1.79	-1.1	-0.24	1	2.96			2.68	1.37	6.73	1.38	1.34	0.153	0.233
-0.594	4.64	0.329	-0.443	1.87	2.69			2.67	1.55	6.48	-0.695	0.952	-0.212	1.14
-0.498	4.89	0.97	-0.114	-0.265	3.22			3.27	0.444	7.34	-0.529	0.582	-0.5	0.999
-1.18	4.11	-1.08	0.16	0.614	3.04			2.52	1.2	5.62	1.67	1.17	-0.339	0.369
-1.29	2.71	-0.931	0.664	0.448	3.72			2.76	1.31	5.87	1.28	0.352	-1.21	1.47
-0.254	3.14	0.167	-0.899	-0.137	2.77			2.64	1.49	5.41	1.62	0.771	-0.317	2.89
-0.58	4.35	-0.221	0.0396	-0.199	3.23			2.64	1.54	5.86	1.47	0.747	-0.301	3.67
-1	3.19	0.501	0.9	0.417	3.09			1.68	1.33	6.83	0.538	0.842	-0.362	3.36
-0.859	4.39	0.247	1.02	0.256	3.05			3.43	1.75	6.92	1.55	1.26	0.383	1.83
-1.39	2.78	-0.15	0.13	0.398	2.9			3.51	1.63	4.21	2.33	0.491	0.639	0.985
-1.49	4.86	-0.918	0.746	0.26	3.97			3.58	1.53	4.46	1.5	0.832	0.965	1.65
-0.922	4.79	0.437	0.767	0.0478	3.41			3.16	1.84	5.47	1.62	-0.0771	-0.344	1.41
-0.255	3.95	-0.173	-0.999	-0.257	5.3			3.99	2.3	6.08	2.98	0.5	0.162	1.36
-0.777	5	-0.915	1.14	-0.118	4.58			2.97	1.44	8.03	3.05	0.699	-0.585	0.135
-0.296	2.95	0.767	-0.00545	-0.805	5.42			2.73	1.09	7.11	1.36	1.2	0.883	1.58
-0.414	4.07	0.478	-0.847	-0.674	3.35			2.62	0.586	5.66	1.03	0.774	-0.283	1.89
-0.121	5.46	-0.805	0.337	-0.894	2.96			2.45	0.995	5.94	2.03	1.29	0.225	2.34
-0.0602	4.31	-0.415	1	-0.48	1.9			2.68	1.19	5.77	3.12	2.18	0.18	1.84
-0.48	5.86	0.677	0.443	-0.29	3.06			2.45	1.85	6.09	2.38	1.86	0.251	2.64
-0.981	5.32	-0.652	-0.128	-0.785	3.07			3.34	0.794	4.24	2.5	1.75	-0.681	1.71
-1.31	4.59	1.27	-0.783	-0.89	2.53			4.45	0.831	3.54	1.74	1.61	-0.36	1.59
-0.376	4.91	-1.37	-0.658	-0.756	2.65			4.39	1.35	5.19	1.93	1.65	0.491	1.88
-0.0409	4.06	-0.316	-0.433	-0.635	2.35			4.06	0.397	5.2	2.07	1.81	0.175	1.17
0.216	3.54	0.669	-0.642	-0.818	1.9			3.05	1.63	5.74	1.44	2.4	0.0972	0.766
0.251	4.22	-0.137	1.33	0.613	1.92			2.89	0.881	5.66	1.66	1.11	0.0371	0.869
0.539	6.26	0.67	0.375	-0.251	1.54			2.77	1.59	6.51	2.14	1.69	0.941	1.73
0.96	6.05	-0.141	0.109	0.215	2.83			3.73	2	6.16	2.42	1.57	-0.159	0.858
1.15	6.08	0.528	0.671	0.166	1.14			2.63	1.62	5.98	1.7	0.709	0.678	2.15
0.205	5.13	1.47	0.842	-0.707	1.59			2.33	0.556	6.24	1.92	1.5	-0.388	1.62
0.989	4.27	0.565	1.48	-0.55	2.56			2.53	1.34	5.83	1.09	2.84	-0.488	2.62
-0.205	4.19	0.0864	0.95	-0.429	3.34			2.36	1.63	4.84	1.09	2.73	-0.00791	1.94
-0.683	4.13	-0.111	1.66	0.311	2.28			2.58	1.84	4.27	1.86	2.6	-0.121	0.605
-1.04	5.68	-0.156	0.457	0.539	4			2.66	1.84	4.68	1.94	1.84	0.264	0.516
-0.408	5.87	-0.493	-0.0667	0.397	3.19			1.97	1.04	4.56	2.15	1.61	-0.11	2.93
-0.405	5.21	0.0539	-0.145	0.812	1.13			2.73	1.61	5.11	1.56	0.66	0.279	3.29
0.45	3.62	0.235	-0.192	-0.384	2.24			2.55	1.82	4.35	1.57	1.41	0.948	1.59
0.925	5.48	0.408	0.457	0.172	1.84			4.74	1.05	4.91	1.34	0.626	0.836	0.982
1.3	4.87	-0.0498	1.41	-0.254	1.97			4.29	1.54	5.99	1.69	1.07	0.0564	1.54
0.176	5	0.841	2.54	0.34	1.05			1.87	1.41	5.78	0.724	1.24	0.249	2.66
-0.168	5.29	-0.947	1.5	1.45	0.753			2.29	1.48	5.43	1.28	1.47	-0.264	2.23
-0.17	6.59	-2.24	2.42	0.959	1.87			3.07	1.77	5.51	1.21	1.7	0.0455	1.43
0.366	4.55	-0.867	2.53	0.344	1.98			3.28	1.25	5.66	1.29	1.37	-0.317	1
-0.724	5.63	-0.574	1.88	0.946	2.62			2.56	2.28	5.89	0.733	1.92	-0.181	3.62
-0.236	3.27	-1.16	1.54	1.93	3.49			3.54	1.48	5.35	0.89	2.08	0.116	2
0.213	4.06	-0.0314	0.987	1.81	3			3.96	0.772	4.52	0.429	2.03	-0.423	2.49
0.242	4.9	0.713	1.52	2.61	2.68			3.27	1.23	4.88	1.28	1.78	-0.546	2.14
-0.376	5.62	0.283	1.53	2.11	3.33			2.98	1.76	5.53	2.21	1.83	-0.413	2.08
-0.357	5.37	-0.877	0.66	3.32	3.07			3.39	1.56	4.89	1.86	2.43	0.872	2.06
-0.543	5.1	-0.184	0.119	2.03	4.07			3	0.684	6.13	1.95	2.05	0.411	1.97
0.281	6.12	-1.94	0.523	1.58	3.16			2.63	0.819	5.98	2.72	1.84	0.22	2
0.0421	4.79	0.0387	0.186	2.19	2.96			1.89	1.26	7.78	1.19	2.12	-0.278	1.54
-0.102	4.27	-0.779	0.286	2.09	3.38			1.46	0.979	4.84	1.22	1.66	0.389	1.87
-1.04	5.11	-0.708	0.318	2.24	2.47			1.77	1.93	5.52	2.6	1.36	-0.207	0.747
-1.13	4.72	-1.85	0.223	2.22	1.34			0.819	0.973	5.53	1.94	1.59	-0.417	1.05
-0.445	5.08	-0.229	1.35	2.39	1.42			1.3	1.15	6	2.53	1.73	-0.0479	0.858
-0.512	2.82	-1.18	0.306	1.34	2.69			0.971	1.35	6.97	2.16	1.47	0.192	1.84
0.00254	3.79	-0.878	0.0313	0.822	2.93			1.48	1.42	6.4	2.02	1.64	0.617	0.374
-0.134	6.29	-0.106	1.09	0.335	1.82			2.1	1.48	6.12	2.28	1	-0.239	2.01
4.23e-05	5.1	-1.33	0.455	0.231	1.9			1.69	1.57	5.63	1.88	1.47	-0.169	0.357
-0.0505	5.27	-0.0254	0.621	-0.386	2.55			1.41	1.46	6.1	2.08	1.26	0.241	-0.39
0.133	6.15	-0.321	1.56	0.593	2.69			2.06	1.65	6.21	1.17	1.63	0.562	0.81
-0.779	5.35	-0.55	2.38	1.47	1.42			2.02	0.421	5.34	1.34	1.01	-0.0195	-0.0312
-0.0611	7.2	-0.00773	2.16	1.21	1.69			0.89	0.179	5.83	1.45	1.31	-0.0154	0.22
0.326	6.9	0.907	0.398	0.36	2.36			1.84	0.492	6.47	1.64	1.24	0.175	-0.0638
-0.188	5.97	0.669	0.148	0.544	2.11			1.35	0.5	6.17	1.34	1.38	-0.158	0.6
-0.266	4.09	-1.15	3.1	0.527	3.1			2.06	1.36	6.46	2.11	1.11	0.16	1.28
-0.73	5.31	-2.21	0.629	0.211	2.38			4.18	1.19	6.28	1.83	0.19	-0.105	0.701
-0.544	5.57	-1.29	2.03	0.363	3.72			3.65	1.15	6.69	1.71	-0.12	-0.326	2.71
-1.34	5.68	0.236	1.38	1.7	3.19			3.35	0.506	7.97	1.37	-0.146	-1.22	1.5
-1.68	7.22	-0.59	1.99	1.35	3.77			2.96	1.93	6.48	1.58	0.533	-1.01	-0.591
-1.28	5.66	0.406	0.285	0.909	2.03			2.72	0.549	8.55	1.59	1.59	-0.553	0.748
-0.649	4.43	0.15	1.68	0.441	3.21			2.41	1.33	7.28	1.48	1.39	-0.188	0.517
-0.591	7.93	0.444	1.64	0.207	2.73			2.08	1.36	6.96	1.56	1.75	-0.384	0.745
-0.909	5.98	0.0732	2.45	-0.95	2.37			1.91	1.33	6.55	2.76	1.89	0.286	2.12
-0.883	5.19	-0.372	2.75	-0.826	1.22			2.67	1.36	7.9	3.71	0.214	-0.667	1.35
-1.4	5.17	-0.157	3.15	-0.0677	1.07			3.22	1.3	7.16	2.82	0.323	-0.493	1.72
-0.901	7.46	-0.587	4	-0.345	1.67			3.48	0.523	6.73	2.94	0.709	-1	2.09
-1.73	3.83	-1.1	2.35	-0.283	1.28			4.75	1.26	6.73	1.79	2.13	0.335	0.0917
-1.21	4.8	-0.53	1.32	0.0394	3.88			4.29	0.895	6.71	1.57	1.8	-0.958	-1.73
-0.654	4.95	1.87	-0.181	-0.383	1.96			3.19	1.12	8.59	1.2	0.77	-0.393	0.0145
-0.503	5.28	-1.03	0.163	-0.2	3.61			4.22	0.836	7.81	0.64	1.1	-0.329	-0.287
-0.206	6.39	-0.229	1.29	-0.657	2.22			3.21	0.848	7.92	1.02	1.89	0.241	1.02
0.318	5.28	0.74	1.05	-0.334	1.77			4.02	0.819	8.23	0.439	2.36	-0.162	1.62
0.416	5.68	0.878	2.04	0.064	1.98			3.93	0.967	7.47	0.109	2.72	-0.3	0.604
0.0077	7.52	0.122	0.754	0.11	2.24			4.53	0.26	7.61	0.292	2.02	-0.169	-0.625
-0.81	6.72	-0.442	1.12	0.265	2.76			3.71	1.16	8.87	-0.0406	1.89	-0.139	0.773
-0.655	5.43	-1.12	1.59	-0.194	1.24			3.69	1.36	6.93	1.05	0.757	0.115	0.709
-1.15	6.53	-1.42	2.84	-0.0576	1.45			3.31	1.08	8.43	0.259	1.42	-0.455	1.68
-1.47	7.49	-0.272	2.37	-0.972	3.04			2.22	1.17	5.96	-0.107	1.42	0.25	-1.02
-1.68	4.82	-0.925	1.98	-0.449	1.13			2.01	0.747	6.78	0.446	1.06	0.296	-0.638
-2.14	6.18	0.595	2.33	0.173	0.956			2.09	0.866	7.18	0.241	0.489	0.052	0.0944
-2.85	7.35	0.66	0.268	1.07	1.18			2.19	1.42	7.14	-0.0449	0.322	-0.493	-0.131
-2.01	4.28	-0.506	0.356	-0.261	1.25			2.29	1.58	8.18	0.308	-0.631	0.47	-0.296
-1.66	8.17	-0.594	2.36	0.225	1.03			3.11	0.897	8.37	-0.301	-0.178	0.56	0.683
-2.51	7.27	-0.826	2.02	-0.476	1.7			3.28	0.596	9.71	-1.01	-0.244	-0.347	-0.972
-2.08	4.85	-0.174	1.49	1	0.213			2.5	1.1	6.02	-0.59	-0.0972	-0.131	-1.59
-2.05	5.29	-0.669	1.02	0.984	0.769			2.63	1.21	6.54	-1.09	1.15	-0.0529	0.899
-2.19	7.05	-0.551	2.77	1.3	0.687			3.43	1.33	7.56	-0.881	1.62	-0.549	1.82
-1.87	6.04	-1.95	2.53	2.67	0.827			4.26	1.16	7.06	-1.39	1.48	-0.321	-0.861
-1.28	6.14	-1.33	-0.00695	2.17	0.468			3.45	0.837	6.41	-0.985	2.49	-0.475	0.344
-0.723	5.19	-2.08	1.49	1.66	1.28			3.74	0.439	7.04	0.753	1.27	-0.146	0.688
-0.276	5.53	-2.23	2.22	1.59	2.62			3.92	1.65	7.74	0.0581	0.933	-0.0629	0.0629
0.236	5	-0.662	2.54	1.73	1.79			3.3	1.22	6.51	-1.45	0.455	-0.855	-0.273
-0.554	6.4	-2.33	2.64	1.7	0.67			3.55	0.694	6.83	-0.0546	1.11	0.0499	0.681
-0.85	4.74	-2.5	2.37	0.942	0.903			3.09	1.51	6.94	-0.232	1.71	-1.4	0.975
-0.752	6.21	-2.61	1.53	0.856	0.876			3.62	0.951	8.65	-0.368	3.88	-0.992	-0.271
-0.506	5.61	-0.138	1.74	2.53	1.8			2.57	1.22	7.84	-1.11	4.02	-0.655	-0.0386
-0.206	5.44	-0.261	0.828	3.34	2.38			3.03	1.16	6.05	-0.649	3.65	0.204	0.0308
-0.3	5.65	-1.04	1.94	2.35	1.08			3.15	1.16	6.11	-0.914	3.61	0.0241	1.38
-0.121	5.81	-0.657	0.91	2.6	1.5			3.51	0.77	6.57	-1.16	2.47	-1.59	0.0798
-1.07	4.65	-0.0774	0.982	3.43	1.45			2.97	1.28	6.86	-0.684	2.12	-0.892	1.55
-1.4	5.27	0.242	1.42	2.77	0.0372			2.25	1.04	4.98	-0.463	1.33	-0.87	-0.556
-2.21	4.27	-1.35	1.12	1.77	1.33			2.01	1.29	5.86	-1.21	1.05	-0.3	1.46
-2.26	4.81	-1.08	1.94	0.973	1.93			1.45	0.897	5.48	-1.16	-0.471	-0.324	0.226
-2.14	5.32	-0.33	0.55	0.683	0.988			2.05	0.308	6.14	0.0878	-0.948	-0.305	2.14
-2.89	6.03	-0.852	0.409	0.481	1.37			1.99	1.02	6.95	0.82	-0.491	-1.24	0.938
-3.18	4.68	-1.08	0.61	0.49	2.7			0.984	0.23	5.66	0.372	-0.499	0.539	1.59
-3.48	4.38	-0.973	0.889	0.344	0.948			1.22	0.116	5.16	0.548	-0.425	-1.09	1.94
-3.81	6.24	0.0261	0.724	1.1	2.42			1.69	1.55	4.65	0.542	-0.266	-1.92	2.4
-3.4	3.73	-0.993	0.944	1.63	3.18			3.43	0.937	5.83	0.253	0.14	-1.19	1.51
-3.73	4.13	-1.9	0.626	2.75	2.23			4.37	0.163	7.25	1.27	-0.105	-0.736	0.969
-4.4	6.41	-0.802	0.572	2.92	1.77			4.54	0.95	7.12	1.48	-0.718	-0.797	3.58
-4.07	6.57	-0.868	-1.52	2	1.76			3.84	0.731	5.49	0.568	-0.123	-0.595	4.21
-2.91	6.57	-1.8	-1.51	1.02	2.4			3.53	0.9	7.77	0.655	-0.233	0.093	3.38
-3.19	6.51	-3.68	-1.57	1.11	2.61			2.85	0.493	7.75	0.895	-0.347	-0.193	2.87
-3.15	5.23	-3.97	-1.37	0.168	2.19			2.43	0.838	6.15	1.03	-0.417	-0.154	3.02
-3.25	5.36	-0.397	-0.623	1.14	3.12			3.08	0.598	5.03	0.391	0.286	-0.154	1.91
-3.73	5.69	-0.544	-0.648	-0.228	3.62			3.89	1.12	6.84	0.392	0.369	-0.063	2.2
-4.15	4.81	-0.36	0.0485	-0.917	3.98			3.37	-0.156	4.51	0.964	0.0186	0.544	2.77
-4.29	4.91	-1.15	-0.551	-0.0194	2.99			4.38	0.538	7.46	0.92	0.559	0.688	1.69
-4.79	7.3	-1.29	-1.44	-0.277	2.25			3.39	0.609	6.41	0.196	0.105	-0.329	1.1
-4.96	4.28	-0.687	-0.0584	-0.409	2.79			2.66	0.255	6.72	0.116	0.824	0.387	1.99
-5.4	4.87	-2.23	0.49	0.32	2.56			3.04	0.13	6.68	0.262	0.844	-0.121	4.63
-5.01	5.94	-0.603	-0.277	0.816	3.18			4.98	-0.231	6.11	-0.169	0.279	0.302	2.58
-5.57	5.76	-1.51	0.332	0.539	3.52			3.81	0.0319	6.07	-0.0341	0.773	0.838	1.83
-4.72	4.46	-0.264	-0.0304	1.05	1.99			3.27	-0.317	7.44	-0.804	1.52	0.178	3.01
-4.65	5.48	-0.572	0.459	1.41	2.84			6.1	0.392	4.71	0.496	2.22	0.00709	2.11
-4.89	4.51	-0.627	-1.19	0.683	2.08			3.34	0.184	6.38	1.2	1.6	0.0835	1.5
-5.16	4.78	-1.33	-1.84	0.145	2.29			3.89	1.31	5.72	1.52	1.65	0.0715	-0.0358
-5.86	5.58	-0.445	-0.0318	0.0931	2.57			4.75	1.79	6.48	0.567	1.92	-0.413	1.22
-6.04	4.01	-2.36	0.106	0.129	1.79			4.01	1.76	5.91	0.968	0.772	-1.04	3.6
-5.18	4.67	-0.806	-0.131	-0.0409	2.22			3.83	1.89	5.16	2	0.377	0.798	5
-5.19	5.69	0.524	0.939	-0.0644	2.5			2.58	1.5	6.15	0.598	-0.31	-0.646	4.22
-4.27	4.87	-0.253	-0.395	0.705	3.09			0.726	1.19	6.04	1.04	1.06	0.052	3.23
-3.45	5.04	0.276	-0.753	0.987	1.22			1.31	0.742	5.26	1.31	0.752	0.427	4.36
-3.12	5.24	-1.01	-1.14	0.437	2.23			0.846	1.22	5.72	0.577	0.374	0.351	5.86
-3.08	4.03	-1.47	-1.16	0.822	2.14			1.46	1.27	5.67	0.922	1.01	-0.269	2.91
-3.05	6.79	-0.977	-0.0539	0.861	2.38			0.74	0.999	4.3	1.12	1.4	-0.861	3.59
-2.73	6.51	-0.545	-0.393	-0.594	2.48			0.259	0.814	5.56	0.105	2.5	-0.538	3.86
-2.79	6.65	0.888	0.354	0.0615	2.43			0.648	1.43	5.81	0.85	2.21	-1.75	1.68
-2.8	5.39	2.14	-0.0387	-0.183	2.64			1.16	1.04	3.29	0.647	2.54	-1.35	4.61
-2.95	6.12	-0.458	0.856	0.73	2.24			0.72	1.24	5.75	1.79	1.35	-1.68	2.17
-2.79	4.61	1.69	0.562	1.09	1.69			1.59	1.6	4.65	1.15	1.21	-1.04	3.59
-2.61	6.29	0.713	3.55	0.479	2.3			3.42	0.56	7.21	1.19	0.241	-0.189	3.4
-2.13	7.11	-0.37	4.24	2.55	2.3			3.37	0.281	4.98	1.54	0.123	-0.0755	3.15
-2.76	5.63	1.73	4.32	1.95	1.73			2.25	0.181	4.97	1.15	-0.437	-1.04	3.86
-3.43	5.76	-0.796	3.32	0.842	1.19			2.75	0.778	4.15	1.39	-0.176	-1.3	3.73
-3.52	5.61	0.631	3.27	0.00266	1.36			2.07	0.932	3.43	0.868	-1.13	-1.07	4.51
-2.93	6.42	0.254	2.69	-0.0442	1.57			2.55	0.33	5.36	0.519	-0.255	-1.24	3.9
-3.28	5.7	-2.46	1.8	-0.357	2.56			2.84	1.04	4.87	1.06	0.387	-0.71	3.24
-3.85	6.25	-0.562	1.99	0.323	2.89			3.29	0.842	6.34	-0.0593	2.31	-0.554	2.93
-3.57	5.14	-0.345	1.79	0.129	3.22			3.44	1.05	6.83	0.69	2.51	-0.883	2.54
-3.75	4.28	-1.15	2.34	0.363	3.25			2.14	0.7	5.38	0.0282	3.32	-0.751	2.01
-4.16	4.69	0.375	1.47	-0.22	2.73			0.912	0.848	5.49	0.117	2.82	-0.448	1.94
-4.42	5.34	-1.07	2.03	0.0581	3.28			-0.249	0.182	5.34	0.0825	2.51	-0.52	3.52
-4.19	5.6	-1.66	1.03	0.379	2.15			2.33	0.47	5.76	1.38	2.89	-0.477	1.83
-4.98	4.92	-1.22	1.59	0.557	1.86			4.62	0.248	6.1	0.347	2.65	-1.04	3.61
-4.92	4.99	-0.688	0.168	0.986	2.89			6.68	-0.382	3.99	0.521	2.45	-0.115	4.24
-4.29	6.84	-0.236	1.23	1.23	2.19			6.06	-0.432	4.19	0.707	2.04	-0.404	3.77
-3.24	5.82	-0.798	1.29	0.802	1.03			4.44	-0.872	4.35	0.203	1.73	-0.648	2.51
-2.89	5.42	-1.9	2.31	0.0688	2.64			4.58	0.369	3.89	-0.417	1.54	-0.508	2.12
-2.62	5.44	-0.894	4.05	0.369	2.35			4.67	0.755	5.1	0.582	4.12	-1.23	3.34
-2.27	5.64	0.488	2.32	-0.239	2.89			4.3	0.859	4.25	0.939	4.28	-0.943	2.98
-2.7	5.58	-1.5	2.65	-0.249	4.41			4.99	1.02	6.15	0.758	3.78	-0.926	2.53
-2.31	4.51	-1.54	1.99	0.158	3.89			4.57	0.47	3.19	-0.0852	3.76	-1.66	3.09
-1.62	4.52	-1.53	2.7	-1.4	3.62			3.83	0.832	1.59	-0.0611	3.73	-1.83	6.3
-1.85	4.73	-1.93	2.05	-1.45	3.94			4.05	0.275	2.04	0.373	2.49	-0.906	1.33
-1.92	5.79	-3.25	2.37	-1.14	3.23			4.81	-0.105	2.73	0.27	1.78	-1.03	2.69
-1.7	5.01	-2.05	2.38	-0.219	3.71			4.59	0.464	2.8	0.384	1.9	-0.695	2.16
-1.43	2.9	-1.07	3.04	-0.773	2.96			3.96	0.0659	3.28	0.606	1.55	-0.614	2.36
-1.37	4.07	-0.906	3.72	-0.512	2.19			3.57	0.317	2.43	0.936	1.26	-0.767	1.53
-1.7	3.95	-0.592	3.22	0.281	1.97			2.79	-0.22	2.18	0.591	0.339	-0.627	1.93
-2.07	4.6	-0.807	2.86	0.554	1.78			1.04	0.558	3.43	0.612	1.17	-0.592	2.19
-1.82	6.04	-1.09	1.69	-0.232	0.536			1.99	0.036	4.48	1.01	0.695	-0.44	2.46
-2.27	3.4	-2.53	1.83	0.918	1.09			2.58	1.22	4.41	0.446	0.721	-0.241	1.15
-3.23	4.2	-1.19	1	2.13	0.688			4	0.926	3.31	-0.304	0.322	-0.0524	3.28
-2.98	6.17	-0.941	1.28	2.02	0.893			3.39	1.61	3.38	0.552	-0.383	-0.378	3.69
-2.81	4.2	-2.19	2.14	1.62	1.01			4.28	0.843	3.12	0.223	-0.00153	-0.228	2.09
-3.06	5.93	-2.07	1.92	0.323	0.0477			4.24	0.18	2.43	0.653	-0.457	-0.393	3.78
-3.55	3.95	-1.21	1.48	0.547	0.722			4.42	-0.384	2.44	0.182	0.356	-0.71	2.78
-3.82	5.13	-2.03	3.54	0.297	1.22			4.98	1.62	3.41	0.237	-0.0532	-0.815	2.54
-3.61	4.62	-1.9	3.8	0.0204	-0.0812			4.49	1.68	1.36	0.62	0.673	-1.75	2.87
-3.86	6.34	-0.538	3.87	0.111	0.678			4.08	1.67	2.08	0.524	0.454	-0.775	2.37
-4.39	7.12	0.112	2.2	0.258	0.268			2.43	1.35	3.53	0.749	-0.203	-1.35	2.86
-4.39	5.97	0.938	2	0.611	1.11			1.79	1.1	5.43	1.75	-0.582	-0.634	2.42
-4.48	5.36	-0.263	2.35	0.272	1.15			2.07	0.471	4.05	1.58	0.577	-0.514	2.64
-4.06	3.62	1.03	2.09	0.329	0.677			2.38	0.741	4.6	1.13	-0.471	-1.6	2.13
-4.3	4.25	-0.588	1.79	0.375	0.0324			1.99	0.44	4.07	0.494	-0.769	-1.41	2.21
-4.56	4.47	-1.98	2.75	-0.382	1.05			1.14	0.313	2.52	0.497	-1.33	-0.19	2.89
-4.37	6.17	-1.85	2.85	0.533	3.3			-0.131	0.296	5.01	0.672	-1.41	-1.1	3.39
-3.81	3.28	-1.26	3.38	-0.226	1.33			0.503	0.615	3.32	0.166	-1.29	-0.266	0.536
-2.9	4.92	-1.7	1.55	0.656	1.46			-0.64	0.969	3.87	0.866	-1.45	-1.02	1.83
-2.52	4.7	-3.71	1.7	-0.00383	2.34			0.595	1.13	4.01	0.764	-1.54	-1.1	2.91
-2.33	4.21	-1.26	4.64	-0.325	2.17			2.02	1.65	4.66	0.668	0.0138	-1.8	2.17
-0.9	4.18	-0.377	4.75	-0.208	2.28			1.64	1.29	4.65	0.477	0.556	-1.05	-0.0399
-1.09	3.37	-0.431	4.86	0.134	2.09			3.54	1.48	5.23	-0.397	0.33	-1.36	2.08
-2	2.74	-1.54	5.1	-0.523	2.38			2.01	1.38	3.13	-0.294	-0.105	-0.603	0.846
-2.78	4.07	-1.56	4.01	-0.648	2.54			0.905	0.249	2.6	-0.37	1.27	-0.541	2.51
-3.2	2.55	-0.83	4.52	-0.598	2.35			0.692	1.71	1.71	0.602	0.183	-1.21	4.49
-3.28	2.8	-1.12	3.6	0.433	2.41			0.301	0.904	2.93	2.67	0.845	-1.77	2.84
-2.86	3.92	-1.12	3.21	1.65	1.3			-0.864	1.79	3.43	2.05	1.67	-1.57	2.07
-3.09	2.03	-1.45	1.41	0.826	1.13			0.284	2.31	3.16	1.85	2.69	-1.5	3.33
-3.97	2.89	-1.25	0.834	1.01	1.56			1.53	1.54	1.87	1.51	1.72	-1.58	4.09
-3.97	5.32	-0.813	1.45	1.13	2.47			2.66	1.14	2.4	0.803	0.804	-0.667	2.98
-3.98	2.72	-1.67	-0.0526	0.601	0.998			3.38	1.17	2.22	0.897	0.654	-1.07	4.17
-2.79	4.4	-0.0902	1.63	0.551	1.24			3.7	1.46	2.19	0.55	0.526	-0.904	2.28
-2.29	4.78	-1.5	2.43	0.312	1.4			3.51	1.18	1.14	1.42	-0.13	-1.05	2.94
-2.72	5.03	-1.55	2.56	-0.0656	0.298			1.69	1.01	2.82	1.73	0.518	-0.624	2.97
-2.91	4.92	-0.671	0.949	-0.219	2.29			0.94	1.06	4.33	1.79	0.0224	-0.0119	3.68
-2.65	4.45	-1.54	0.382	-0.0168	1.71			0.829	0.94	5.18	0.938	-0.306	-0.315	2.03
-3.37	3.3	-1.9	2.75	0.713	1.4			1.38	0.902	4.01	1.04	-0.469	0.128	2.56
-3.4	3.72	-1.21	4.02	2.27	1.87			2.46	0.208	4.25	-0.132	0.188	-0.902	1.07
-2.65	2.44	0.0964	3.92	1.86	2.2			1.74	0.903	3.85	0.104	0.511	-0.715	1.35
-2.99	2.78	0.0736	3.63	1.29	1.23			2.53	0.632	3.72	-0.961	0.65	-0.449	1.78
-3.91	3.98	0.21	2.69	1.15	0.712			1.88	0.599	4.68	-0.688	0.384	-0.652	2.31
-4.45	3.86	-0.461	2.27	0.164	1.91			0.972	0.268	2.8	-0.847	0.183	-1.15	1.49
-5.18	2.19	-1.42	0.802	0.918	-0.137			-0.243	0.35	3.92	-0.776	-0.0588	-1.22	-0.0265
-5.34	4.04	-2.58	0.659	0.0965	0.943			0.254	0.723	4.46	-0.697	-0.447	-1.42	1.85
-6.08	2.73	-2.36	1.67	0.601	1.07			0.959	1.2	3.49	-1.04	0.532	-1.63	0.861
-6.12	5.03	-1.18	1.46	0.0193	2.64			1.59	0.473	5.31	-0.613	0.408	-1.18	1.47
-5.16	2.52	-1.94	0.281	-0.0681	1.67			2.57	1	4.48	-0.192	0.586	-0.556	3.2
-2.7	3.14	-1	-0.949	-0.308	1.23			1.64	1.44	2.51	0.415	0.251	0.223	2.2
-2.1	2.63	-1.28	1.74	0.606	2.76			2.16	1.6	4.23	0.738	0.325	-1.49	1.31
-3.52	5.24	-0.211	2.26	1.22	2.23			1.08	0.577	2.53	0.61	0.22	-0.716	2.52
-4.12	3.9	-1.74	0.422	0.949	2.65			1.27	0.548	4.41	0.0797	0.334	-0.812	1.74
-5.51	2.45	-1.19	0.808	0.679	0.137			0.507	1.38	5.09	1.04	-0.346	-0.828	1.73
-5.44	3.62	-2	-0.0965	0.294	3.01			0.912	0.0281	2.88	0.678	-0.456	-0.713	0.277
-5.1	3.39	-3.56	-0.197	0.709	1.73			0.558	1.21	3.64	1.57	-1.45	-0.111	3.36
-1.53	3.77	-2.17	0.309	-0.351	2.83			0.761	5.42	4.71	0.693	-1.41	-0.392	2.54
-0.683	2.77	-2.14	-1.11	-0.372	2.79			0.685	-0.808	5.81	0.618	-1.04	0.208	2.29
-1.91	4.57	-2.29	-0.18	-0.516	3.07			0.773	1.12	5.35	2.41	-0.718	-0.327	1.91
-2.48	4.2	-1.4	0.397	-0.409	5.26			0.655	0.764	4.17	0.471	-0.406	-0.453	0.83
-2.24	5.64	-1.02	1.63	0.41	3.75			1.04	-0.148	4.84	0.787	-0.323	-0.875	0.987
-2.66	5.59	-3.51	2.67	0.227	2.12			0.781	0.238	5.42	1.3	0.442	-0.526	0.99
-1.93	4.83	-0.976	1.89	0.749	3.19			1.71	0.321	4.15	2.11	-0.705	0.584	2.37
-1.16	2.18	-1.48	1.26	0.797	3.77			0.198	0.399	5.74	1.61	-0.53	-0.08	1.38
1.4	4.17	-2.23	0.494	0.793	1.79			-0.532	0.259	4.31	1.21	-0.556	0.0798	0.84
1.03	5.71	-1.06	0.92	0.292	3.44			1.47	-0.294	3.48	1.7	-1.57	-0.756	3.17
-0.557	3.22	0.317	0.78	0.554	4.64			0.852	-0.653	5.53	2.19	-1.59	-0.353	2.04
-2.05	5.02	-2.3	1.55	0.572	3.71			0.859	0.546	5.03	1.63	-0.798	-0.669	1.96
-2.9	3.37	-3.22	0.577	1.02	3.01			0.517	0.471	4.78	1.85	-2.12	-0.182	2.43
-3.66	2.99	-1.91	-1.31	1.03	2.53			1.8	0.212	3.78	0.526	-1.35	-0.562	1.79
-4.12	3.38	-1.19	-1.15	1.34	2			2.18	-0.369	2.39	0.979	-0.597	-0.321	3.72
-4.2	5.66	-0.737	-0.571	0.536	3.8			1.85	0.89	3.18	0.76	-0.0381	-1.47	1.14
-4.7	5.75	-0.871	-0.434	0.896	5.05			0.772	0.194	5.08	0.527	-0.778	-1.16	2.61
-4.35	3.14	-0.607	-2.59	0.583	2.95			-0.104	-0.616	3.74	0.589	-0.286	-1.37	2.56
-4.41	3.87	-2.2	-2.24	0.519	3.57			-0.0598	0.388	4.43	1.32	-0.117	-0.88	4.2
-4.61	2.53	-1.83	-1.48	0.686	3.65			0.276	-0.301	3.59	0.513	-0.728	-1.82	2.15
-4.38	4	-1.28	-1.43	0.557	2.67			1.45	0.353	3.49	0.419	-0.573	-1.59	1.72
-4.05	1.99	-1.69	2.04	0.662	2.8			3.6	-0.387	1.89	1.09	-0.257	-2.25	1.29
-3.35	3.76	-1.61	0.919	0.451	3.38			2.71	0.363	4.53	1.1	-0.017	-1.69	0.161
-3.81	2.97	-1.7	0.926	1.28	3.15			3.64	0.917	0.885	1.32	0.597	-2.27	2.06
-4.31	2.31	-2.91	2.94	0.647	2.43			1.81	0.306	0.584	0.317	0.919	-1.17	2.4
-4.36	2.96	-1.54	2.54	0.487	3.16			2.03	-0.135	-0.672	0.996	0.275	-1.24	1.09
-3.25	2.85	-2.85	3.03	0.515	2.55			1.7	0.275	3.51	1.37	0.232	-0.824	2.51
-2.08	5.75	-1.76	2.48	0.237	3.53			3.18	0.678	2.99	1.03	0.649	-0.476	2.37
-1.81	3.26	-0.475	2.8	-0.215	2.73			2.01	0.222	5.48	0.419	0.761	0.08	1.59
-1.94	3.16	-0.905	0.00704	-0.572	2.25			2.85	0.7	6.35	0.0667	0.979	-0.111	1.11
-1.54	4.69	-0.438	0.617	-0.846	3.47			1.57	0.339	2.92	-0.166	0.0585	-1.08	0.76
-1.41	5.26	-0.419	0.667	-1.1	3.09			0.991	-0.135	3.83	-0.272	0.148	-0.983	1.71
-2.51	3.93	-1.72	0.97	-1.23	3.47			1.03	0.339	4.75	-0.445	-0.362	-1.14	1.57
-2.97	2.19	0.0657	2.78	-0.689	3.22			1.59	-0.061	2.54	1.04	0.0114	-0.958	-0.368
-2.77	1.62	0.0396	0.653	-0.609	3.75			0.78	0.33	2.49	1.18	0.222	-0.928	2.51
-2.61	4.01	-1.63	0.645	0.185	3.43			-0.718	0.596	4.01	2.53	0.24	-1.3	0.301
-2.66	5.05	-0.435	-0.839	0.864	4.08			-0.231	1.13	3.27	1.98	0.321	-0.835	1.05
-2.66	3.31	1.5	0.839	0.554	2.57			-1.18	0.21	4.03	2.06	0.283	-0.571	1.14
-3.59	1.91	0.0251	-0.0581	0.454	3.2			-1.42	0.388	3.69	1.76	0.937	-1.54	1.99
-4.31	2.85	-0.523	0.00935	-0.0825	3.44			-0.963	0.0722	5.06	1.13	0.24	-1.73	2.58
-4.81	2.54	0.914	-0.772	-0.149	4.11			-0.382	0.556	4.87	0.516	1.25	-1.63	2.91
-5.01	1.98	1.39	-0.635	-0.363	3.72			0.267	-0.463	4.84	1.2	2.12	-0.504	1.58
-3.9	2.15	0.909	0.0183	-0.234	2.17			-0.135	-0.111	3.94	2.12	2.61	-0.334	0.631
-2.72	2.9	-0.298	2.26	0.278	4.14			1.35	0.281	3.58	3.05	2.77	-1.11	0.328
-2.8	2.26	1.03	1.4	-0.0849	4			0.487	-0.105	4.41	3.82	2.55	-1.14	2.91
-3.22	3.71	1.77	1.35	0.381	4.41			1.87	0.75	3.29	3.99	2.23	-0.414	1.64
-3.39	3.23	1.78	0.598	0.941	3.73			2.85	0.345	3.16	2.56	1.74	0.185	3.64
-3.58	3.45	0.291	0.59	2.99	3.26			1.78	0.217	1	1.34	0.35	-1.09	4.04
-2.92	2.17	-0.143	0.296	3.09	3.1			1.83	0.214	2.51	1.98	1.76	-0.531	2.52
-2.99	1.43	1.93	0.26	2.08	5.04			2.12	-0.151	4.14	1.45	1.81	-2	1.93
-3.24	3.04	0.671	1.45	1.55	2.76			2.12	-0.184	3.17	0.715	1.49	-2.2	2.08
-4.51	1.62	-0.86	1.17	1.78	4.18			1.71	-0.986	4.47	0.556	0.403	-2.26	2.35
-4.57	3.22	-0.501	1.63	0.397	3.92			1.16	-0.757	4.06	0.701	0.968	-1.79	1.08
-3.8	1.17	1.02	2.47	-0.0634	3.63			1.56	-0.296	3.42	1.09	-0.0281	-0.926	0.966
-2.57	2.26	1.62	1.82	1.05	2.6			0.817	-0.232	2.57	0.623	-0.303	-1.51	0.166
-1.74	2.24	0.834	2.01	0.0583	3.32			-0.555	-0.677	1.87	-0.0202	0.58	-0.0947	1.49
-2.05	4.43	0.998	0.307	0.536	3.91			-1.06	-0.481	1.26	0.0957	0.758	-0.652	2.28
-2.89	2.86	1.63	0.262	2.28	3.53			-0.307	-0.466	3.13	0.796	0.0191	-0.399	1.72
-3.65	1.59	0.0892	-0.229	2.06	4.31			-1.62	-0.278	2.59	0.93	1.11	-0.287	2.52
-4.26	0.332	0.577	-0.294	1.78	3.93			-0.687	0.348	1.58	1.37	1.75	-0.522	1.47
-4.69	0.21	-0.254	1.47	0.942	4.29			-0.409	0.605	2.05	0.257	1.89	-0.776	0.465
-4.85	1.28	0.868	-0.0869	0.647	4.82			-0.442	0.585	0.482	-0.32	1.52	-1.13	1.85
-4.72	1.91	-0.0496	-0.35	2.25	5.06			-0.477	0.246	0.98	0.633	1.28	-0.305	1.58
-4.69	1.68	-0.361	-0.0984	1.58	3.01			-0.106	-0.276	1.33	1.26	1.32	-0.832	0.934
-3.9	3.25	-0.884	0.134	0.423	3.37			-0.621	-0.724	2.58	2.43	2.73	-0.594	3.52
-3.78	3.41	-0.182	1.14	0.536	4.54			-0.258	-0.824	1.41	1.48	1.88	-0.637	0.431
-3.94	2.42	0.0968	2.61	0.399	3.23			0.0905	0.248	1.01	1.96	2.46	-1.44	2.5
-4.67	3.04	-0.171	2	0.885	3.27			1.04	0.142	0.595	1.76	2.24	-1.19	2.46
-4.24	2.37	-0.601	2.01	0.0435	3.27			1.47	0.637	2.54	1.31	1.49	-0.305	2.12
-3.7	3.75	0.398	1.66	-0.499	4.24			2.07	-0.64	1.88	1.98	2.72	-0.0208	1.63
-4.3	2.7	0.219	3.24	-0.222	4.45			2.47	-0.321	2.04	1.38	3.18	-0.701	1.5
-4.76	1	-2.09	2.6	-0.161	5.96			1.85	-0.154	1.02	1.34	5.26	0.00434	0.852
-5.17	3.18	-1.11	2.65	-0.136	4.62			1.78	-0.921	1.44	0.991	7.97	-1.08	1.28
-5.09	1.64	-1.22	2	0.464	3.6			0.653	-1.04	1.78	0.733	9.08	-0.772	2.76
-5.14	2.23	-1.8	1.48	0.946	4.09			-0.0978	-0.264	4.37	1.46	8.73	-1.01	2.41
-5.32	1.42	0.0467	2.83	1.01	5.27			-0.527	0.553	3.28	0.822	8.65	-1.21	1.89
-6.15	3.57	0.273	2.69	0.619	5.1			-0.86	0.914	3.93	0.132	7.74	-2	1.53
-5.97	2.99	0.0692	1.6	0.623	3.54			0.325	1.11	4.21	0.0238	6.02	-1.53	1.13
-5.93	2.93	1.39	2.74	0.482	4.48			-0.839	0.698	3.17	-0.755	5.7	-0.881	2.66
-3.89	2.41	0.142	-0.656	0.494	4.95			-0.746	0.922	5.08	0.356	5.5	-0.64	1.12
-1.12	2.74	-0.152	0.0189	0.784	3.48			-0.459	0.864	5.42	0.256	4.19	-0.849	0.254
-0.493	2.33	-0.0294	-0.096	0.363	3.57			2.04	0.732	3.98	-0.0454	3.36	-0.83	1.29
-0.953	3.14	-0.506	0.132	0.448	2.93			0.327	-0.826	6.69	-0.737	3.15	-1.36	1.78
-1.82	1.27	-0.698	-1.64	0.0507	4.18			1.5	-1.29	5.06	-0.811	2.78	-0.549	0.27
-2.1	3.64	-0.91	-1.43	0.475	4.33			0.00201	-0.217	6.59	-0.75	1.32	-1.49	2.44
-1.47	4.18	-0.21	-0.646	-0.0159	4.07			-0.29	-0.632	4.59	-0.434	1.53	-2.11	1.25
-1.41	4.13	-0.271	-0.948	0.0828	1.94			0.0609	0.453	7.21	-0.0802	3.41	-2.09	2.24
-1.49	3.08	-0.31	-1.36	0.36	3.84			0.921	0.494	5.78	0.404	3.82	-1.81	1.24
-0.0603	3.68	-0.0294	-2.84	0.195	4.77			-0.155	0.515	5.34	0.0965	3.85	-1.47	1.73
-1.51	4.83	-2.08	-2.26	0.0958	4.11			1.18	0.488	4.19	-0.0542	3.21	-0.161	1.75
-1.31	2.76	-1.34	-2.58	0.329	4.57			1.9	-0.366	4.41	0.127	2.86	-0.952	1.99
-1.87	2.5	-0.212	-1.24	0.223	4.9			2.16	0.161	6.04	0.38	3.14	-1.28	2.8
-2.17	3.08	-1.54	-1.02	1.36	4.13			1.87	0.417	5.24	1.25	3.17	-0.526	1.27
-2.28	2.06	-0.465	-0.589	0.357	3.92			1.19	0.719	4.44	1.33	3.06	-1.24	1.57
-2.5	1.58	2.01	0.855	1.3	4.22			2.14	1.59	6.02	1.24	2.21	-2.54	2.3
-2.35	2.36	1.29	1.41	0.606	3.9			0.467	1.53	3.69	0.525	1.55	-1.1	1.34
-2.08	3.47	0.483	0.785	0.575	3.82			0.0154	0.235	3.19	0.95	0.958	-1.74	2.05
-2.99	3.18	-2.17	1.31	-0.039	5.26			0.336	0.357	2.4	0.0178	1.25	-1.88	0.649
-3.14	4.01	-0.093	-0.0113	-0.286	4.78			-0.308	0.105	1.95	0.99	0.901	-1.53	-0.324
-3.15	1.79	1.47	0.0284	0.245	4.26			1.26	0.739	4.14	0.482	1.84	-0.856	0.595
-3.82	3.81	2.19	-1.03	0.562	5.13			0.565	1.15	4.79	1.66	1.52	-1.14	1.41
-4.24	2.39	0.937	-1.42	0.746	5.24			-0.868	0.708	5.42	2.67	2.69	-0.98	3.9
-4.08	2.5	0.0199	-0.182	0.862	5.44			-0.702	0.338	6.33	1.27	1.74	-0.772	2.92
-3.04	1.58	0.218	0.84	0.55	5.58			-2.13	0.343	5.48	1.35	2.4	-1.48	1.67
-1.76	2.55	0.753	0.275	0.303	4.04			-2.45	0.477	4.38	0.835	1.93	-0.229	-0.528
-2.14	1.7	-0.899	-0.845	0.2	3.98			-2.14	1.02	4.52	1.18	2.47	-0.792	-0.837
-1.99	2.51	-2.01	-0.0169	0.559	4.07			-2.05	0.174	4.74	0.582	2.98	-2.27	0.844
-1.22	3.98	-0.607	0.295	-0.148	3.16			-2.48	0.83	5.17	0.815	2.42	-2	1.12
-1.53	3.36	-1.06	-0.308	-0.544	5.5			-1.97	0.242	5.32	1.32	3.53	-1.81	2.21
-1.94	2.36	1.41	0.142	-0.428	3.26			-2.16	0.708	5.09	0.211	4.32	-2.34	0.657
-2.65	3.71	-0.578	-1.69	-0.675	4.8			-0.902	0.443	4.48	-0.062	4.25	-2.71	2.41
-2.3	2.92	0.151	-1.12	-0.502	2.6			-0.935	0.445	4.58	0.205	3.93	-3.03	0.607
0.106	3.43	1.33	-1.41	0.041	4.19			0.251	0.531	3.84	0.0936	4.06	-1.47	1.01
1.15	3.19	-0.333	0.304	-0.636	4.52			-0.0984	0.546	4.94	0.118	4.29	-1.95	0.239
0.184	2.48	-0.979	-2.14	-0.853	4.81			-1.43	0.703	4.51	0.574	4.87	-1.21	0.282
-0.492	3.33	-2.15	-2.31	-0.66	4.13			-1.42	0.639	4.03	-0.518	3.4	-1.75	1.2
-0.95	2.17	-0.464	-1.62	0.0598	5.21			-0.911	1.09	5.15	0.189	3.86	-1.86	1.72
-1.98	2.68	-0.397	-2.38	-0.648	4.11			-1.89	-0.0701	4.57	0.678	3.99	-1.66	0.57
-2.94	2.47	-1.77	-1.4	-0.547	4.19			-1.7	0.454	4.21	1.3	4.17	-2.11	1.33
-2.77	3.06	-1.09	-1.74	-0.0553	5.07			-2.57	0.415	3.31	0.89	4.71	-2.45	0.49
-3	2.01	-0.844	-2.15	1.31	4.1			-2.32	-0.0309	4.11	0.509	5.38	-2.86	0.442
-3.96	1.52	-0.994	-1.71	0.565	5.35			-1.17	1.64	5.12	0.134	5.43	-2.18	1.32
-3.91	2.3	-0.279	-1.17	1.29	5.3			-3	0.852	5.73	0.425	4.83	-1.61	1.89
-3.26	2.85	-0.748	-0.436	0.71	4.76			-1.89	0.901	5.73	0.768	5.02	-1.92	0.966
-1.59	1.95	-0.844	-1.21	1.05	4.55			-2.14	0.991	4.78	0.868	5.24	-1.55	0.982
-0.233	2.7	-0.845	-2.08	0.887	4.31			-0.724	1.48	3.9	1.36	5.32	-0.597	0.934
-0.0671	3.17	-1.38	-0.374	0.144	5.63			-1.07	0.639	4.39	0.77	4.59	-1.19	-1.49
-1.23	1.12	-1.92	-2.11	-0.16	4.39			0.0066	0.543	4.75	0.901	4.54	-1.59	0.971
-1.98	1.85	-1.92	-1.43	0.219	4.23			-1.51	-0.137	4.55	0.711	4.17	-1.06	1.54
-1.66	4.22	-1.09	-2.61	0.1	4.97			-0.606	0.662	5.84	-0.0267	3.8	-1.54	-1.42
-1.35	2.15	-1.67	-1.93	0.291	4.29			-1.74	-0.00478	4.98	0.176	3.46	-1.74	2.07
-1.68	4.51	-1.17	-0.837	1.19	4.11			-1.27	0.122	4.96	0.0751	3.56	-1.34	0.469
-1.73	2.87	-2.36	0.237	1.93	2.86			-1.87	0.281	5.21	0.435	3.53	-1.18	0.379
-2.23	1.98	-3.16	-0.981	2.69	4.52			-0.64	-0.0149	4.21	-0.0778	4.21	-1.49	0.873
-2.49	0.4	-2.42	0.422	2.26	4.97			-0.673	0.423	4.68	0.428	4	-1.23	2.4
-3.3	2.91	-2.66	-0.817	2.23	4.66			-1.01	-0.0994	4.12	0.458	3.97	-1.64	-0.291
-3.06	4.11	-0.772	-0.638	1.73	4.56			-1.58	0.28	4.3	0.211	3.04	-2.91	1.23
-3.25	3.19	-0.72	-0.68	2.21	3.77			-2.75	0.717	5.04	1.25	2.59	-2.17	0.829
-1.75	2.52	-1.94	-0.106	1.59	3.08			-3.16	0.603	5.11	1.28	2.55	-3.28	1.52
-2.03	2.46	-0.509	1.45	1.52	4.91			-3.3	0.132	5.19	1.16	2.98	-2.59	-0.0539
-2.09	1.48	-1.85	-1.27	1.06	3.55			-3.59	0.686	4.98	1.15	1.86	-2.33	0.602
-2.02	1.86	0.0181	-1.33	0.0764	5.62			-3.59	0.621	5	1.1	2.29	-1.39	0.265
-2.44	1.09	-0.81	-1.66	0.133	5.16			-3.44	0.569	3.99	0.767	1.96	-1.58	0.354
-3.15	2.7	-1.32	-0.551	0.341	4.02			-4.56	0.537	3.63	0.865	1.87	-2.12	-0.997
-3.27	3.3	-0.98	-0.19	0.403	3.21			-5.2	1.14	4.33	0.565	1.9	-1.66	0.238
-3.11	2.25	-2.14	-0.968	-0.513	4.15			-4.42	0.788	4.15	0.302	1.47	-1.45	1.91
-2.94	3.11	-1.56	-0.936	0.286	1.59			-3.79	-0.513	3.77	0.228	1.72	-1.81	0.184
-2.43	2.6	-1.39	-0.426	0.556	4.25			-3.56	0.447	6.98	0.0299	1.7	-1.38	-0.129
-2.07	1.24	-0.651	-0.51	0.678	3.17			-3.41	0.418	3.77	1.03	1.22	-1.11	-0.0742
-2.17	1.55	-0.678	-0.229	0.968	2.73			-3.16	0.961	3.3	-0.343	1.88	0.0919	0.00833
-2.24	1.8	0.49	0.328	0.781	3.73			-3.98	-0.0829	4.42	-0.0976	2.08	-1.5	2.21
-2.63	2.99	-0.382	0.524	1.21	2.59			-3.74	0.582	4.74	0.962	2.35	-2.64	0.904
-3.09	3.12	-0.9	-0.0789	0.56	2.15			-3.61	0.0907	4.66	0.167	2.15	0.632	0.791
-3.62	2.76	-0.632	-0.744	0.118	2.87			-4.4	-0.208	5.18	0.624	2.24	-0.693	1.26
-4.1	2.66	-1.23	0.761	1.06	2.74			-4.29	-0.0232	5.44	0.862	1.73	-0.776	1.42
-3.86	4.07	-0.338	1.89	0.129	2.64			-3.37	-0.0823	4.6	1.49	0.474	-1.24	-0.137
-3.73	2.35	-0.744	0.421	-0.389	2.8			-4.35	-0.141	4.01	0.627	0.393	-1.75	-0.0141
-2.54	2.28	1.05	0.363	0.232	2.89			-3.95	-0.303	4.85	0.358	0.247	-0.817	0.343
-2.66	2.17	0.239	0.0489	1.33	1.94			-2.3	-0.312	6.16	1.82	-0.333	-1.51	-0.323
-2.2	2.3	-1.15	0.366	1.01	2.2			-1.81	-0.0752	5.65	1.49	0.337	-1.3	-1.6
-1.94	2.86	-5.84	-0.484	1.36	1.05			-0.252	-0.37	6.08	1.33	1.73	-1.69	-0.289
-1.58	4.57	-3.33	0.35	1.02	1.66			0.0292	-0.293	6.01	1.44	1.52	-1.71	-0.193
-2.52	1.82	-3.56	1.16	0.588	2			-1.39	-0.109	4.5	1.44	1.43	-1.26	-1.36
-3.17	1.08	-2.8	0.622	0.456	2.11			-1.43	0.0116	5.83	1.57	1.03	-0.619	0.377
-4.83	2.85	-2.68	0.0801	0.538	4.1			-1.52	-0.179	3.93	1.65	1.14	-0.867	-0.367
-5.49	1.94	-1.21	1.07	1.2	2.95			-1.6	-0.577	3.97	0.982	0.561	0.229	-0.38
-5.65	0.726	-2.75	1.35	-0.159	3.12			-0.609	0.0355	4.08	2.04	-0.154	-0.204	0.798
-5	2.46	-3.02	2.06	-0.166	2.28			-0.542	0.88	3.05	1.85	-0.219	-1.3	-0.617
-5.01	2.05	-2.6	2.37	-0.711	2.24			-1.32	0.959	4.04	1.61	0.525	-1.35	0.315
-5.48	2.07	-1.83	1.07	-1.23	2.38			-1.07	0.84	3.59	0.795	0.101	-1.77	0.657
-5.6	3.48	-2.4	0.591	-0.82	4.43			-2.59	0.0524	3.4	0.817	0.123	-2.01	0.207
-5.16	1.62	-2.33	0.626	-0.83	1.36			-2.93	-0.0967	3.56	0.957	-0.063	-1.84	-1.93
-4.23	0.989	-3.01	1.88	0.285	2.58			-3.88	1.01	3.02	1.29	0.898	-1.6	-2.79
-4.09	3.68	-3.66	0.941	0.305	3.04			-2.23	0.925	5.16	1.6	1.78	-1.51	0.651
-3.49	1.52	-2.65	0.339	0.943	1.4			-2.68	0.674	3.37	0.83	2.24	-1.6	1.23
-2.85	2.02	-2.54	0.112	0.42	3.68			-2.72	1.09	3.07	1.52	2.19	-1.71	1.74
-0.477	3.3	-2.6	1.22	0.154	2.86			-3.22	0.543	3.63	1.54	2.14	-1.62	1.73
-1.2	2.88	-2.54	0.0699	-0.263	2.26			-2.5	1.04	4.82	0.782	1.47	-0.905	0.333
-1.2	3.51	-3.13	0.159	-0.465	3.44			-2.13	0.457	4.34	0.408	0.173	-1.72	3.46
-1.52	3.29	-2.32	1.2	-1.23	5.11			-2.9	0.126	3.73	0.498	-0.147	-1.44	2.2
-2.67	0.622	-3.88	-0.181	-0.669	3.42			-1.41	0.595	3.59	0.016	0.134	-2.13	1.66
-2.8	2.24	-1.94	3.54	-0.221	3.53			-1.5	0.789	2.16	-0.0798	1.11	-1.52	-0.891
-3.44	1.38	-2.11	3.55	0.0447	4.54			-0.693	0.475	3.21	-0.202	2.15	-0.368	1.51
-4.44	2.74	-2.21	2.52	-0.243	5.4			-1.99	-0.153	2.43	0.133	1.71	-1	2.37
-4.82	1.95	-2.24	3	-0.614	4.71			-0.945	0.179	2	0.97	2.2	-1.39	0.516
-5.07	1.68	-3.85	1.51	-0.523	3.25			-2.47	0.522	4.19	1.19	2.67	-2.16	2.74
-3.9	1.89	-4.63	1.71	-0.54	3.88			-4.15	0.182	2.6	0.294	1.76	-1.4	2.56
-2.99	3.72	-4.99	2.53	0.0921	4.15			-4	0.88	1.92	0.488	1.13	-1.74	2.43
-2.68	0.902	-3.99	2.37	0.554	5.01			-4.47	0.735	4	0.198	1.72	-1.63	3.29
-3.41	3.09	-2.81	1.12	1.49	4.33			-4.63	-0.0317	4.56	0.492	1.63	-0.853	2.91
-3.96	1.28	-2.35	1.52	0.76	4.44			-3.14	0.307	2.57	1.01	2.19	-0.801	3.17
-4.21	0.544	-4.31	-0.642	0.63	3.75			-3.93	-0.316	0.557	1.62	2.2	-0.392	2.15
-4.37	1.7	-4.09	0.59	0.64	5.44			-4.77	0.223	2.91	0.455	1.5	-0.659	1.38
-4.14	1.87	-3.4	1.63	0.726	4.14			-4.09	-0.468	2.47	0.821	0.74	-1.88	1.9
-4.29	3.16	-2.87	0.395	0.869	3.77			-2.89	1.01	2.91	0.492	0.748	-1.62	2.44
-4.35	2.02	-0.505	0.142	0.857	3.49			0.445	0.711	4.2	-0.156	0.0242	-1.57	1.14
-3.58	0.516	-0.902	0.972	1.56	4.12			1.37	-0.0117	3.15	0.113	-0.0232	-1.98	0.317
-3.88	-0.846	0.88	1.03	1.5	4.15			2.88	0.0641	3.12	-0.147	-0.511	-2.14	0.16
-2.7	-0.0708	2.03	2.15	1.33	4.22			1.21	0.669	2.82	-0.951	-1.25	-2.05	1.45
-1.47	0.374	-0.203	2.35	1.73	3.54			0.234	-0.19	4.21	0.0987	-1.35	-1.89	-0.496
-2.03	1.55	-0.272	2.8	1.36	3.84			-0.411	0.0601	3.61	0.745	-0.851	-2.56	0.0258
-2.09	-0.0077	-0.908	2.73	0.712	4.38			1.1	0.235	3.83	0.785	-0.97	-2.92	0.395
-0.294	-0.0152	0.72	4	0.683	2.91			1.55	-0.313	2.42	0.0894	-0.24	-3.36	1.96
-0.532	1.71	3.13	3.21	0.71	3.25			1.33	1.09	4.54	-0.123	-0.54	-2.14	1.9
-1.68	1.27	1.44	3.34	1.12	3.82			-0.909	-0.122	3.39	0.325	-0.412	-1.85	0.244
-3.59	2.06	1.91	2.51	0.989	5.72			-2.04	0.877	3.41	0.139	0.0779	-1.98	-2.17
-3.81	3.63	2.42	2.73	1.35	4.26			-2.13	0.064	1.41	0.429	0.18	-2.07	-0.775
-3.21	1.82	2.54	0.701	0.604	4.38			-1.71	0.119	2.62	0.578	0.684	-1.45	0.598
-2.37	-0.0569	1.37	0.436	0.888	5.68			-1.77	-0.243	2.81	0.489	0.478	-1.73	0.515
-2.45	1.84	0.789	1.69	1.28	5.23			-0.809	-0.309	4.46	1.15	0.692	-1.72	1.07
-2.51	1.95	1.15	1.86	1.49	3.42			-0.846	-0.364	3.75	0.321	1.39	-1.59	0.0096
-2.9	0.38	2.64	1.36	0.588	4.26			-0.252	0.386	3.2	1.09	0.555	-1.08	-1.72
-2.74	3.14	1.63	0.939	1.32	4.94			-0.827	-0.0245	2.46	0.801	0.358	-1.58	-1.21
-2.48	1.88	1.83	0.395	0.177	3.84			-1.38	0.338	2.11	1.03	-0.337	-1.65	-1.08
-2.86	1.87	1.3	-1.17	0.484	4.44			-2.02	0.544	3.23	1.48	-0.938	-1.46	0.336
-2.44	1.8	0.644	-1.95	0.0179	2.65			-2.4	-0.0579	1.07	1.01	-0.0446	-1.56	-1.23
-2.15	1.36	2.87	-1.13	0.882	3.15			-2.25	-0.67	2.47	0.142	-0.14	-1.65	-0.706
-1.42	2.44	3.92	-1.73	-0.234	2.79			-3.55	-0.819	2.63	0.41	-0.506	-1.81	-0.214
-2.61	3.25	1.81	-2.07	0.428	3.66			-1.65	0.0588	2.02	0.196	-0.89	-1.98	-1.24
-2.79	1.84	2.08	-2.05	0.728	3.36			-2.66	-0.286	4.28	0.431	-0.964	-2.15	0.628
-3.37	-0.644	1.2	-0.684	0.359	3.28			-3.26	-0.416	4.12	0.52	-0.15	-1.71	1.46
-3.18	1.21	4.05	0.35	-0.0243	2.08			-4.78	-0.106	4.08	0.929	-0.764	-1.79	0.646
-1.98	2.63	3.75	-2.03	-0.0597	2.32			-4.1	0.499	1.81	0.137	-0.165	-1.7	1.42
-1.19	1.67	2.13	-1.32	-0.495	3.97			-2.87	0.312	2.73	0.413	0.691	-1.73	-1.46
-0.833	0.545	-0.26	0.686	0.123	2.54			-2.34	0.486	2.83	-0.29	0.299	-0.501	-0.523
-1.93	2.43	-1.96	-0.441	-0.496	3.84			-1.76	-0.0562	3.4	-0.68	-0.756	-1.54	0.674
-2.5	2.39	0.946	-0.0865	-0.657	3.17			-0.845	-0.381	3.37	-0.118	-0.708	-1.13	-0.265
-3.49	1.79	-0.251	0.362	-0.313	3.34			-1.21	-0.368	2.6	-0.273	0.82	-1.58	-0.443
-3.61	1.34	-0.54	0.421	-0.259	2.9			-3.14	0.396	1.81	0.62	0.925	-1.89	-0.364
-4.76	2.67	0.863	0.322	-1.01	2.82			-2.68	0.567	2.66	0.142	1.79	-1.29	-0.278
-4.97	0.776	-0.457	-0.973	-0.992	2.22			-4.45	0.35	1.55	0.805	1.17	-2.18	-1.61
-4.2	1.55	0.196	-1.04	-0.566	3.86			-4.53	-0.306	2.83	1.5	1.51	-1.19	0.33
-3.06	1.15	-1.36	-1.55	-0.0946	3.15			-3.77	-0.0454	2.43	2.39	1.56	-1.52	-0.263
-2.27	1.87	-0.284	-0.445	-0.325	2.08			-2.49	0.828	2.93	1.84	2.35	-1.62	-0.759
-2.42	2.36	0.301	-1.67	-0.246	2.77			-3.51	0.897	1.74	1.2	2.16	-2.46	-0.543
-3.31	1.24	-0.745	-1.22	-0.016	2.09			-2.14	-0.0906	3.17	1.67	2.71	-1.34	0.999
-3.47	1.73	-2.04	-1.13	-0.164	3.2			-1.63	0.642	2.19	1.05	2.03	-1.25	-0.0621
-3.64	1.86	-2.61	-1.87	-0.604	2.16			-2.11	1.11	2.77	0.778	0.728	-2.09	0.0788
-2.96	1.48	-1	-1.07	-0.572	4.07			-2.81	0.296	4.61	0.435	0.517	-1.92	0.923
-2.78	1.83	-1.93	-0.856	-0.724	3.97			-3.75	0.403	4.01	0.481	0.581	-2.08	1.46
-2.46	0.108	-1.97	-0.718	-0.955	4.6			-2.68	0.607	1.18	0.23	0.813	-1.81	1.3
-2.59	1.61	-1.77	-0.523	-0.503	4.25			-2.63	-0.529	2	-0.148	2.61	-1.21	2.41
-3.32	1.55	-2.06	-0.177	-0.738	2.64			-2.97	-0.0381	2.8	0.247	3.43	-0.18	0.908
-3.35	0.0459	-0.979	-1.24	-0.154	4.05			-3.35	-0.395	5.37	1.33	3.14	-1.21	0.728
-3.27	-0.301	-3.92	-1.48	-0.119	3.76			-2.69	0.657	3.8	1.65	2.91	-2.32	0.788
-1.66	1.96	-3.22	-1.6	0.724	4.63			-2.79	0.396	3.25	1.21	3.29	-1.32	1.83
-0.704	1.87	-1.84	-1.3	0.615	4.73			-2.2	0.585	3.42	0.494	3.16	-0.704	-0.409
-1.95	0.575	-2.29	-0.756	0.292	4.2			-3.94	0.678	3.58	0.503	2.73	-0.489	2.34
-3.01	2.69	-0.673	-1.45	0.105	4.86			-2.81	0.279	2.58	0.785	3.02	-1.26	2.08
-3.94	1.66	-1.24	-2.19	-0.279	2.36			-1.74	1.41	1.92	1.74	2.6	-1.15	0.666
-3.97	1.78	-1.36	-3.22	-0.377	3.07			-0.309	1.14	1.46	3.51	2.73	-0.386	-0.497
-3.64	1.54	-0.594	-2.03	0.165	2.81			-0.938	0.399	2.45	3.7	2.16	-1.47	0.157
-3.38	1.99	-0.0192	-2.65	-0.165	4.1			-1.12	1.55	2.09	2.22	2.03	0.0257	1.83
-3.32	1.12	-1.13	-3.04	-0.582	3.95			-1.15	1.47	0.327	2.31	2.47	-1.37	1.33
-3.64	0.478	1.25	-2.07	-0.925	3.58			0.558	0.815	3.16	1.04	2.25	-1.44	2.08
-3.33	0.626	0.767	-3.03	-0.942	2.79			0.609	0.498	1.63	1.72	2.6	-1.52	2.37
-2.36	1.59	-0.535	-1.6	-0.294	2.66			2.05	0.375	1.56	2.03	2.99	-1.28	0.336
-2.24	0.205	0.878	-0.207	-0.299	3.36			-0.314	0.0937	2.12	1.35	4.66	-3.11	0.159
-2.67	2.76	-0.811	-0.157	-0.503	3.91			-1.88	0.838	5.24	1.98	3.72	-2.14	1.42
-2.98	2.3	-1.13	-0.976	-0.397	3.53			-1.99	0.263	4.25	1.7	3.77	-2.82	0.712
-1.46	1.85	-0.912	-0.123	0.0677	4.59			-1.65	1.11	2.86	1.09	4.83	-2.16	0.653
-0.275	0.668	-0.612	-0.76	-0.554	3.38			-2.8	0.223	2.42	0.466	5.21	-1.2	-0.346
-0.53	1.22	-0.832	0.143	-0.599	4.09			-2.92	-0.259	2.81	0.368	3.62	-2.06	0.589
-1.31	3.3	-1.41	-0.298	-0.0486	3.59			-4.15	-0.00919	2.01	0.486	3.91	-1.98	0.801
-0.666	2.38	-2.42	-0.197	-0.979	3.9			-3.38	0.395	1.74	0.835	1.91	-2.31	1.21
-0.762	2.5	-1.81	-1.8	-0.0494	3.95			-3.83	1.12	2.62	0.979	2.69	-2.56	0.0916
-1.05	3.94	-3.84	-0.816	-0.465	3.6			-3.55	0.934	3.69	-0.304	2.13	-2.57	2.24
-0.768	1.67	-3.47	-1.22	-0.809	3.23			-2.92	0.604	3.23	0.951	2.6	-1.69	-0.129
0.173	1.67	-2.2	1.21	-0.281	3.04			-1.14	0.883	3.16	0.986	2.65	-3.02	-0.0513
0.992	1.25	-1.62	1.04	-0.56	3.35			-0.684	1.13	1.99	0.359	1.8	-1.82	-1.37
2.4	2.3	-1.05	2.51	0.16	2.54			-0.628	0.88	1.97	-0.169	2.34	-1.86	0.00306
2.06	3.25	-2.35	1.59	-0.802	2.76			-2.01	0.962	3.73	-0.394	2.87	-1.86	0.93
1.05	3.09	-3.42	1.57	0.171	1.85			-3.32	1.51	2.82	-0.768	2.79	-1.54	1.11
0.188	0.993	-4.62	1.76	0.656	4			-0.863	0.771	3.02	0.809	2.2	-1.74	0.923
-0.166	3.08	-2.61	1.58	0.631	3.08			0.289	1.43	3.04	0.962	2.78	-1.68	0.687
-1.05	0.239	-3.94	1.84	-0.253	2.36			-0.296	0.865	2.9	0.905	1.43	-1.58	0.883
-2.08	1.66	-2.19	2.42	-0.217	4.08			-0.594	0.784	3.47	0.335	2.16	0.0989	0.478
-1.97	0.842	-3.17	0.908	0.299	2.66			0.743	0.0153	1.87	0.697	2.06	-0.79	-0.664
-0.89	3.29	-2.82	-0.541	0.0486	2.76			-0.278	0.123	1.88	0.167	1.81	-0.887	-0.438
-1.35	0.96	-3.73	-0.205	-0.0265	2.49			0.643	1.2	1.15	0.633	2.22	0.519	0.0165
-2.16	2.51	-2.2	-0.967	-0.637	2.2			1.14	1.14	2.31	-0.177	2.25	0.678	0.311
-0.592	0.192	-2.97	0.433	0.0497	3.93			0.848	1.34	2.27	0.615	1.97	-0.0151	-1.04
-1.69	1.61	-3.08	0.137	0.614	3.1			1.49	0.534	4.42	1.15	2.84	-0.558	-0.188
-2.3	0.083	-0.937	-0.612	0.16	2.66			1.68	1.13	1.68	0.829	1.95	-0.569	1.96
-2.53	1.02	-2.01	-0.555	-0.409	4.11			0.444	0.683	3.32	1.92	2.88	0.475	0.0388
-2.1	2.67	-0.0264	-1.89	0.113	3.81			1.52	1.06	4.16	1.03	2.65	-1.75	1.38
-1.81	2.72	-1.81	0.506	0.934	4.41			-0.397	1.29	2.23	0.652	1.69	-0.013	-1.29
-2.54	1.04	-2.44	-0.444	0.708	4.02			-0.36	0.365	2.35	-0.136	1.17	-0.177	0.729
-1.86	0.933	-1.66	-1.44	0.565	5.76			0.0112	0.0606	2.09	0.995	1.7	-0.0231	-0.55
-0.319	0.271	-1.13	0.986	0.849	4.83			0.0164	1.5	0.821	-0.113	1.65	0.0124	-0.391
0.395	2.33	-1.64	-0.158	0.542	3.13			-0.12	1.25	1.69	-0.0635	1.89	-1.13	-0.997
-1.49	0.362	-1.94	0.12	0.448	4.31			-1.04	0.797	1.7	0.102	1.62	-0.427	-0.74
-2.57	1.52	-0.505	0.347	0.514	4.87			-0.715	0.642	1.14	0.895	1.85	-0.232	0.514
-3	1.79	-1.31	-0.623	0.192	3.33			-1.1	1.23	2.83	0.336	1.51	-0.621	-1.54
-2.75	0.496	0.157	-1.14	-0.332	3.73			-0.373	1.16	4.13	0.286	1.03	0.576	-0.183
-3.66	2.51	-0.584	-0.56	0.023	3.57			-1.77	0.594	3.3	-0.0107	2.44	-0.893	-0.308
-4.13	2	-2.87	0.11	0.28	3.42			-0.862	1.42	3.06	0.179	2.61	-0.278	1.9
-4.72	3.69	-1.87	0.138	0.441	3.24			-1.06	0.569	3.06	-0.154	2.04	-1.14	-1.3
-3.95	0.000901	-2	-0.524	0.227	1.95			-0.338	0.56	2.68	0.391	3.08	-1.23	0.448
-3.56	1.36	-1.37	0.369	0.49	2.61			-1.12	0.964	1.8	0.468	2.61	-2.63	0.85
-3.78	2.43	-0.841	-0.443	-0.128	4.08			-2.56	0.734	3.52	0.806	1.81	-2.48	-0.641
-4.08	3.23	-0.678	0.386	-0.373	4.31			-1.75	0.604	1.99	0.341	1.84	-2	-1.72
-4.73	-0.819	-1.41	-0.847	-0.716	4.71			0.935	0.166	3.07	-0.385	2.94	-2.15	0.728
-4.81	2.17	-1.49	0.404	0.49	3.24			-0.176	1.33	4.37	-0.124	2.06	-1.25	0.0273
-5.17	2.3	-2.2	0.561	0.288	2.88			-1.47	1.67	2.92	0.658	1.51	-2.5	-0.305
-4.97	3.56	-0.546	1.83	-0.0211	2.51			0.548	0.595	3.16	-0.0628	1.63	-2.55	-0.853
-4.63	3.08	-1.79	0.612	0.226	3.33			-1.6	0.179	3.58	-0.0653	1.36	-1.73	-1.58
-4.39	0.658	-2.35	0.239	-0.628	3.43			-1.17	0.678	2.03	-0.244	0.866	-2.23	-3.9
-4.47	3.57	-0.739	0.129	-0.881	3.07			-0.0444	1.42	1.54	0.0747	0.536	-1.64	-1.88
-5.26	2.78	0.671	0.0466	-0.77	2.37			-1.22	0.526	0.53	0.334	1.14	-2.03	0.163
-5.45	-0.471	0.553	0.00732	-0.241	3.09			-2.53	1.39	2.62	0.112	1.67	-2.12	-1.4
-5.25	0.6	-0.529	1.34	0.0139	3.01			-1.65	0.633	3.46	0.718	1.53	-1.67	-1.69
-5.52	1.19	-2.62	0.645	0.278	2.57			-2.55	1.21	0.997	0.741	1.44	-1.78	-2.1
-5.31	2.04	-2.75	1.33	0.495	1.86			-1.8	1.1	1.96	0.11	0.813	-1.61	-1.17
-4.97	1.33	-1.71	0.732	1.57	3.58			-2.3	0.886	2.87	0.367	0.791	-2.27	-2.48
-5.05	1.36	-1.77	1.71	1.31	3.72			-1.64	1.17	0.693	0.17	0.752	-2.27	-1.41
-5.36	0.225	-3.03	5.23	0.642	3.89			-2.45	0.906	2.98	0.704	1.09	-1.76	-2.11
-6.26	2.65	-1.44	5.57	0.976	3.45			-1.26	0.974	3.04	-0.271	0.55	-2.34	-1.6
-5.74	1.1	-1.55	4.72	0.178	2.14			1.27	0.636	3.23	0.53	0.875	-2.61	-2.8
-3.61	4.04	-2.3	4.12	1.03	2.35			0.762	0.529	2.97	0.609	1.37	-2.33	0.54
-3.28	2.7	-1.43	2.26	0.226	3.72			-0.692	0.797	4.01	-0.211	1.35	-2.64	1.1
-1.77	1.13	-1.62	1.65	0.226	3.13			-0.46	0.505	3.48	0.697	1.42	-2.79	0.629
-1.28	1.47	-1.66	0.912	-0.26	3.44			-0.0744	0.43	3.44	0.0677	2.41	-2.7	-1.6
-1.53	0.921	-2.15	1.32	-0.148	2.73			-0.603	0.819	2.95	-0.615	1.91	-2.62	-2.2
-2.66	2.79	-2.05	-0.0182	0.237	3.02			-0.735	-0.405	2.57	-0.319	2.04	-2.75	-1.14
-3.29	1.98	0.0555	0.556	-0.288	4.06			-2.7	1.16	3.9	0.165	1.35	-2.81	-1.38
-2.68	1.02	-1.4	0.876	0.0282	3.22			-2.73	0.325	2.47	-0.116	1.6	-3.24	-0.128
-2.87	0.468	-2.85	0.822	0.2	4.07			-2.03	1.23	2.95	-0.661	1.83	-3.41	-1.37
-2.96	0.0939	-2.43	1.91	0.421	2.68			0.074	-0.437	2.89	0.0198	2.6	-3.53	-1.48
-3.27	1.37	-2	4.08	0.506	3.14			0.381	0.239	3.07	-0.166	1.87	-3.8	-0.942
-3.61	0.884	-1.11	2.77	0.421	3.93			1.05	0.243	2.23	-0.181	1.51	-3.38	-0.612
-3.28	0.233	-1.54	2.22	0.702	2.73			0.593	-0.0486	3.35	0.765	0.801	-2.94	-1.89
-3.26	0.991	-2.31	3.39	0.765	2.4			1.26	0.89	1.36	0.248	1.99	-3.2	-1.59
-3.35	1.75	-1.65	3.1	0.736	2.84			2.02	0.961	1.99	0.262	2.81	-2.55	-1.74
-4.12	1.79	-2	2.02	0.534	1.55			0.689	0.442	3.27	0.0835	2.38	-2.83	-1.92
-4.3	0.0194	-1.26	1.33	0.0409	2.43			0.283	0.598	2.14	-0.0686	1.29	-2.56	-1.35
-4.02	-0.763	-2.47	0.253	-0.344	2.02			-0.39	0.912	3.64	-0.429	0.942	-3.16	0.0489
-2.15	-1.64	-1.56	-0.0146	0.578	2.25			0.665	0.263	3.93	-0.848	0.96	-2.6	-0.705
-0.597	3.25	-1.11	1.83	0.171	0.173			0.351	1.27	3.42	0.321	-0.098	-2.28	-1.7
-0.328	2.61	-0.726	0.226	-0.727	2.24			-0.639	0.85	3.4	0.423	0.0271	-2.14	-2.28
0.0394	2.18	-1.16	-0.0576	-0.554	1.24			0.0689	0.0126	2.73	0.405	0.575	-3.21	0.482
-0.0448	2.87	-1.43	0.936	-0.177	2.72			1.93	0.901	2.58	-0.312	1.71	-2.96	-0.367
-1.88	1.09	-0.94	-0.132	-0.982	2.74			1.9	0.56	2.31	-0.182	3.35	-2.6	-1.91
-3.24	1.22	-1.6	-0.709	-1.3	3.34			2.54	1.34	3.9	-0.497	3.76	-2.4	-1.34
-4.55	1.95	-1.57	2.3	-0.673	2.11			1.58	1.29	2.11	0.13	3.63	-2.97	-2.16
-4.8	2.5	-1.48	3.75	-0.771	2.21			0.616	1.8	2.82	-0.0865	3.52	-2.83	-2.59
-4.81	1.1	-1.15	3.46	0.0471	1.61			1.07	1.3	3.41	-0.056	2.98	-1.83	0.257
-4.3	2.48	-1.41	3.65	0.315	3			1.62	1.03	1.83	0.164	3.62	-1.83	0.0239
-3.61	1.91	-1.3	3.48	0.253	2.71			2.04	1.45	3.17	0.256	2.32	-2.24	1.13
-3.39	1.89	-1.44	4.57	0.743	4.35			0.421	1.27	2.46	-0.199	1.55	-2	-1.25
-3.18	1.6	-1.32	3.5	0.444	2.5			0.953	1.34	3.7	-0.108	2.52	-1.55	-0.752
-4.6	0.535	-1.34	2.59	0.631	2			1.53	0.42	2.42	0.0238	2.57	-0.803	-1.84
-4.13	1.58	-1.05	3.29	0.287	2.51			0.646	0.268	4.2	-0.0865	2.38	-0.936	-2.82
-3.5	1.15	0.719	3.31	0.594	1.55			0.149	-0.177	2.14	0.0841	2.94	-2.79	-3.54
-3.22	2.53	-0.109	3.57	1.01	1.27			-0.693	-0.304	2.33	-0.478	1.24	-2.07	-2.03
