# Supplementary material for: Metabolic sensing in AgRP neurons integrates homeostatic state with dopamine signalling in the striatum
Source: eLife journal article supplement (doi:10.7554/elife.72668), 2022-01-12
Supplement: fig5-data1 [file Fig5O.xlsx]

## Sheet: Sheet1
	WT									KO
-20-0	0.501437	-0.0215321	0.643713	-0.692186	0.236907	0.0335266				0.398643	0.212965	0.29177	0.71722	0.194711
0-30	2.71735	2.59109	1.49074	-1.43753	0.591973	0.225403				0.353283	2.36768	-0.158003	1.89912	1.65623
30-60	0.943312	0.359234	0.158287	-1.62024	0.0663283	-0.0581501				0.42496	1.62939	0.0993642	-0.793829	0.371217
