# Supplementary material for: Metabolic sensing in AgRP neurons integrates homeostatic state with dopamine signalling in the striatum
Source: eLife journal article supplement (doi:10.7554/elife.72668), 2022-01-12
Supplement: fig5-data1 [file Fig5P.xlsx]

## Sheet: Sheet1
	WT									KO
-20-0	-0.619585	0.294219	-0.176649	0.809831	0.20283	0.584221				0.160995	0.438273	1.14304	0.337066	0.336927	-0.265558	0.597704
0-30	-2.16994	4.67315	-0.673138	1.0943	0.550602	2.45579				2.47326	0.912777	5.18553	0.954112	0.969937	-0.404292	1.8478
30-60	-2.84895	2.00445	-0.996885	0.37227	0.298613	3.57398				-1.11155	0.435124	3.36584	0.600988	2.05569	-1.56721	0.421938
