# Supplementary material for: Metabolic sensing in AgRP neurons integrates homeostatic state with dopamine signalling in the striatum
Source: eLife journal article supplement (doi:10.7554/elife.72668), 2022-01-12
Supplement: fig5-data1 [file Fig5Q.xlsx]

## Sheet: Sheet1
	WT								KO
fed	15.502	8.298	9.6	5.393	9.406	10.101			8.203	7.599	9	11.699	7.296
fasted	15.506	13.296	10.901	14.903	5.607	36.594			14.997	11.601	16.6	16.998	9.103	27.205	9.1
