# Supplementary material for: Metabolic sensing in AgRP neurons integrates homeostatic state with dopamine signalling in the striatum
Source: eLife journal article supplement (doi:10.7554/elife.72668), 2022-01-12
Supplement: fig5-data1 [file Fig5R.xlsx]

## Sheet: Sheet1
	WT								KO
fed	3.401	6.898	7.199	22.905	1.791	11.299			10.292	9	7	7.499	2.502
fasted	4.099	5.006	2.398	8.803	11.599	2.804			8.699	19.699	5.805	6.195	12.798	6.594	10.996
