# Supplementary material for: Metabolic sensing in AgRP neurons integrates homeostatic state with dopamine signalling in the striatum
Source: eLife journal article supplement (doi:10.7554/elife.72668), 2022-01-12
Supplement: fig6-data1 [file Fig6O.xlsx]

## Sheet: Sheet1
	WT								KO
2.5	0.99183	1.02895	0.967735	1.00013	1.04736	0.887758	1.1061	1.11463	1.24051	1.05788	0.903532	1.17122	0.976056	0.921732	1.00119	0.948992
10	0.984938	0.9462	1.00612	1.03487	1.00023	0.950503	0.925473	1	0.91895	1.03635	0.812139	0.846481	0.813025	0.864162	1.05339	1.08594
30	1.14496	1.11944	0.996713	1.10774	1.01802	1.04246	1.1194	1.18182	1.14597	1.07406	0.936164	0.973444	0.939716	0.825772	1.19914	1.08883
