# Supplementary material for: Metabolic sensing in AgRP neurons integrates homeostatic state with dopamine signalling in the striatum
Source: eLife journal article supplement (doi:10.7554/elife.72668), 2022-01-12
Supplement: fig6-data1 [file Fig6P.xlsx]

## Sheet: Sheet1
	WT								KO
2.5	1.07909	1.02977	0.999835	1.1012	1.02149	0.91132	0.956098	1.06951	1.03981	1.31294	0.914875	1.07101	1.14346	0.895949	0.876631	1.00593
10	0.997238	0.984434	1.07078	0.995198	1.05241	1.04012	1	1.06229	1.00591	1.0739	0.988439	0.975053	1.22258	0.893064	1.05078	1.00651
30	1.1306	1.09994	0.949524	1.23552	1.03433	1.12743	1.27408	1.18589	1.07216	1.00251	0.949462	1.00376	0.992601	0.895884	1.1404	1.10888
