# Supplementary material for: Metabolic sensing in AgRP neurons integrates homeostatic state with dopamine signalling in the striatum
Source: eLife journal article supplement (doi:10.7554/elife.72668), 2022-01-12
Supplement: fig6-figsupp1-data1 [file elife-72668-fig6-figsupp1-data1-v2.zip]

## Sheet: Sheet1
		WT						KO
0.5*	0:00:30*	0.537289462*	0.616057389*	0.334603235*	0.174671539*	0.249517053*	0.883940652*	0.812054057*	0.51669365*	0.822184989*	1.579540939*
1.5	0:01:30	0.62439	0.802589	0.772952	0.603419	0.726447	0.79013	0.989192	0.528013	1.09729	0.367026
2.5	0:02:30	0.674176	0.779711	0.746243	0.852184	0.891033	0.84977	0.789081	0.979236	0.916077	1.05401
3.5	0:03:30	0.63654	0.866477	0.903366	0.894631	0.877749	0.82228	0.870728	0.819488	1.04477	0.986536
4.5	0:04:30	0.591295	0.785226	0.691553	1.00177	1.01986	0.711953	0.88472	0.788947	0.907696	0.950403
5.5	0:05:30	0.892742	1.0293	0.916554	0.912654	0.989977	0.881457	0.827196	1.14579	0.866767	0.932865
7.5	0:07:30	0.848947	0.893284	0.748498	1.13374	0.964427	0.787159	1.03879	0.997091	0.982808	1.04311
10.5	0:10:00	0.918178	0.997951	0.84648	0.927588	0.979398	0.911663	0.938015	0.903063	0.935675	0.824645
13.5	0:13:30	0.908505	0.898823	0.913088	0.98011	0.945187	0.869762	0.958914	0.957677	0.96476	0.835197
17.5	0:17:30	1.00252	0.92172	1.00592	0.895279	0.938529	0.902841	0.913796	1.0351	0.941652	1.00094
22.5	0:22:30	0.910128	0.959463	0.947967	0.972968	0.874664	0.916229	1.02866	0.998745	0.974789	1.07675
27.5	0:27:30	1.0289	0.988293	0.939977	0.914435	0.865075	0.930334	0.977879	1.03424	0.963127	1.05979
32.5	0:32:30	0.964218	1.03701	0.965017	1.10332	0.95172	0.936025	1.07194	0.860057	1.0732	1.00082
37.5	0:37:30	0.984478	0.919095	1.09343	0.898904	0.984262	1.1605	0.976619	1.01455	0.973563	1.19797
45	0:45:00	1.08572	1.03788	0.96801	0.934677	1.05402	1.05893	1.12251	1.07548	1.21603	1.27483
55	0:55:00	1.08147	1.02716	1.145	1.13814	1.09431	1.13368	1.10403	1.09071	1.13368	1.22428
