# Supplementary material for: Metabolic sensing in AgRP neurons integrates homeostatic state with dopamine signalling in the striatum
Source: eLife journal article supplement (doi:10.7554/elife.72668), 2022-01-12
Supplement: fig6-figsupp1-data1 [file FigS3B.xlsx]

## Sheet: Sheet1
		WT						KO
0.5*	0:00:30*	0.062003497*	0.527314337*	0.34266871*	0.18555014*	0.26798938*	0.33334411*	0.83791215*	0.21498093*	1.240738423*	0.373313634*
1.5	0:01:30	0.42092	0.623454	0.804209	0.443861	0.829435	1.16062	1.13158	0.348029	1.17112	0.439607
2.5	0:02:30	0.873629	0.820592	0.853414	0.898073	0.744752	0.758422	1.01436	0.883491	1.2312	0.941062
3.5	0:03:30	0.633214	0.956641	0.826136	0.739771	0.78256	1.07969	1.08335	0.774756	1.17031	0.951157
4.5	0:04:30	1.03044	0.784734	0.815161	0.859746	0.727938	0.771114	1.15729	0.673393	1.03966	0.862299
5.5	0:05:30	0.870612	1.02836	0.886743	0.806113	1.00065	1.03577	0.918698	0.834665	1.04012	0.834791
7.5	0:07:30	0.916073	0.835222	0.880618	0.946954	0.883137	0.942888	1.04417	1.00512	1.10308	1.18834
10.5	0:10:00	0.979437	0.922313	0.807345	0.915306	0.905118	0.939866	1.03814	0.825245	1.07958	0.856676
13.5	0:13:30	0.968861	1.00027	0.987362	1.0538	0.919759	0.946164	1.04653	0.864315	1.09778	0.985796
17.5	0:17:30	0.984503	0.907466	0.89521	1.18935	0.847021	0.959518	0.944823	1.00712	0.97386	1.136
22.5	0:22:30	0.906125	0.903512	0.975667	0.976805	0.855208	0.996524	1.00192	0.987573	0.991426	1.02367
27.5	0:27:30	0.982367	0.91786	0.930806	1.0702	0.825325	0.957794	0.925186	0.976756	0.987062	1.0413
32.5	0:32:30	0.968909	0.964121	0.97431	1.02688	0.938243	0.969128	0.993705	0.96213	1.00937	0.956171
37.5	0:37:30	1.07243	1.05519	1.12037	1.08259	0.988528	1.15705	1.06228	1.1997	0.986134	1.2329
45	0:45:00	1.13288	1.02311	0.997805	1.03408	1.0325	1.04568	1.01308	1.24672	1.00887	1.23274
55	0:55:00	1.08186	0.961131	1.18323	1.02591	1.02831	1.13015	1.00569	1.19556	1.00293	1.19999
